# Supplementary material for: Tumour ischaemia by interferon-γ resembles physiological blood vessel regression
Source: Springer Nature journal article supplement (doi:10.1038/nature22311), 2017-04-25
Supplement: 41586_2017_BFnature22311_MOESM1_ESM.pdf [file 41586_2017_BFnature22311_MOESM1_ESM.pdf]

Supplementary Information Table 1a | Recombination frequencies in PBMC.

| GFP expression in % of (n) | PIG <sup>Cmv-Cre</sup><br>(11) |      | PIG <sup>Lys-Cre</sup><br>(8) |      | PIG <sup>Fsp-Cre</sup><br>(11) |     | PIG <sup>Pdgfb-Cre-IFN<math>\gamma</math>-del</sup> +tamoxifen<br>(4) |     | PIG <sup>Pdgfb-Cre-IFN<math>\gamma</math>-del</sup> +tamoxifen tumour-bearing<br>(4) |     |
|----------------------------|--------------------------------|------|-------------------------------|------|--------------------------------|-----|-----------------------------------------------------------------------|-----|--------------------------------------------------------------------------------------|-----|
|                            | M                              | SD   | M                             | SD   | M                              | SD  | M                                                                     | SD  | M                                                                                    | SD  |
| CD11b                      | <b>83.5</b>                    | 11.4 | <b>40.7</b>                   | 10.5 | <b>80.1</b>                    | 1.6 | <b>0.2</b>                                                            | 0.2 | <b>1.8</b>                                                                           | 0.3 |
| Gr-1                       | <b>75.4</b>                    | 11.1 | <b>41.7</b>                   | 12.6 | <b>70.9</b>                    | 4.9 | <b>0.0</b>                                                            | 0.0 | <b>0.1</b>                                                                           | 0.1 |
| CD11c                      | <b>88.5</b>                    | 11.4 | <b>23.2</b>                   | 6.5  | <b>84.8</b>                    | 6.3 | <b>0.6</b>                                                            | 0.3 | <b>9.8</b>                                                                           | 0.7 |
| NK1.1                      | <b>91.6</b>                    | 12.4 | <b>0.5</b>                    | 0.3  | <b>96.5</b>                    | 1.0 | <b>0.2</b>                                                            | 0.1 | <b>11.3</b>                                                                          | 5.3 |
| CD19                       | <b>27.4</b>                    | 5.6  | <b>0.3</b>                    | 0.2  | <b>18.7</b>                    | 3.2 | <b>0.0</b>                                                            | 0.0 | <b>0.2</b>                                                                           | 0.2 |
| CD4                        | <b>42.7</b>                    | 6.0  | <b>0.2</b>                    | 0.1  | <b>35.7</b>                    | 2.5 | <b>0.1</b>                                                            | 0.2 | <b>0.9</b>                                                                           | 0.4 |
| CD8                        | <b>37.5</b>                    | 5.7  | <b>0.2</b>                    | 0.1  | <b>29.0</b>                    | 4.0 | <b>0.2</b>                                                            | 0.3 | <b>0.4</b>                                                                           | 0.3 |

Percentage of recombination as % GFP<sup>+</sup> cells of the respective PBMC subpopulation is shown. (Mean  $\pm$  Standard Deviation). PIG x IFN $\gamma$ -R<sup>del</sup> mice backcrossed to the respective Cre-transgenic mice shown in the 1<sup>st</sup> row. In the last column PBMC from PIG x IFN $\gamma$ -R<sup>del</sup> mice backcrossed to PDGFB-CreER-IRES-GFP x IFN $\gamma$ <sup>del</sup> + tamoxifen bearing MCA313<sup>IFN $\gamma$ -IND</sup> tumours are shown. (n) = number of mice analysed.

Supplementary Information Table 1b | Recombination frequencies in tumour stroma cells.

|                       | PIG <sup>Cmv-Cre</sup> |      |   | PIG <sup>Lys-Cre</sup> |      |   | PIG <sup>Fsp-Cre</sup> |      |   | PIG <sup>Pdgfb-Cre-IFN<math>\gamma</math>-del</sup> |     |   | PIG <sup>IFN<math>\gamma</math>R-del</sup> (no cre) |      |   | WT          |     |   |
|-----------------------|------------------------|------|---|------------------------|------|---|------------------------|------|---|-----------------------------------------------------|-----|---|-----------------------------------------------------|------|---|-------------|-----|---|
|                       | M                      | SD   | n | M                      | SD   | n | M                      | SD   | n | M                                                   | SD  | n | M                                                   | SD   | n | M           | SD  | n |
| % CD11b of total      | <b>42.9</b>            | 6.7  | 6 | <b>28.5</b>            | 7.6  | 6 | <b>40.9</b>            | 4.1  | 5 | <b>28.9</b>                                         | 7.8 | 8 | <b>35.5</b>                                         | 15.5 | 5 | <b>39.1</b> | 6.1 | 8 |
| % GFP+ of CD11b       | <b>89.5</b>            | 2.5  |   | <b>58.5</b>            | 10.2 |   | <b>88.9</b>            | 4.2  |   | <b>7.5</b>                                          | 3.2 |   | <b>0.1</b>                                          | 0.2  |   | <b>0.1</b>  | 0.1 |   |
| % Gr-1 of total       | <b>5.7</b>             | 1.9  | 6 | <b>2.9</b>             | 1.8  | 6 | <b>3.3</b>             | 1.1  | 5 | <b>3.3</b>                                          | 2.5 | 8 | <b>3.8</b>                                          | 1.7  | 5 | <b>3.3</b>  | 1.6 | 8 |
| % GFP+ of Gr-1        | <b>75.3</b>            | 9.7  |   | <b>58.5</b>            | 10.2 |   | <b>81.6</b>            | 3.6  |   | <b>0.5</b>                                          | 0.4 |   | <b>0.0</b>                                          | 0.0  |   | <b>0.0</b>  | 0.0 |   |
| % CD11c of total      | <b>2.0</b>             | 1.1  | 6 | <b>2.7</b>             | 0.8  | 5 | <b>1.8</b>             | 1.1  | 6 | <b>2.6</b>                                          | 1.7 | 8 | <b>3.0</b>                                          | 1.2  | 6 | <b>2.0</b>  | 0.8 | 7 |
| % GFP+ of CD11c       | <b>63.5</b>            | 16.9 |   | <b>31.3</b>            | 11.0 |   | <b>54.7</b>            | 31.6 |   | <b>3.8</b>                                          | 3.2 |   | <b>0.1</b>                                          | 0.1  |   | <b>0.0</b>  | 0.1 |   |
| % NK1.1 of total      | <b>0.5</b>             | 0.1  | 3 | <b>0.9</b>             | 0.3  | 6 | <b>0.9</b>             | 0.3  | 6 | <b>0.4</b>                                          | 0.1 | 6 | <b>0.6</b>                                          | 0.4  | 6 | <b>1.1</b>  | 0.7 | 4 |
| % GFP+ of NK1.1       | <b>72.6</b>            | 12.3 |   | <b>0.5</b>             | 0.3  |   | <b>31.9</b>            | 6.5  |   | <b>4.2</b>                                          | 2.2 |   | <b>0.2</b>                                          | 0.3  |   | <b>0.1</b>  | 0.2 |   |
| % CD19 of total       | <b>2.2</b>             | 1.9  | 4 | <b>1.3</b>             | 1.2  | 5 | <b>1.2</b>             | 1.4  | 4 | <b>1.7</b>                                          | 2.3 | 4 | <b>1.0</b>                                          | 0.4  | 4 | <b>1.0</b>  | 0.9 | 7 |
| % GFP+ of CD19        | <b>9.3</b>             | 8.4  |   | <b>0.6</b>             | 1.1  |   | <b>1.4</b>             | 1.7  |   | <b>0.6</b>                                          | 1.3 |   | <b>0.0</b>                                          | 0.0  |   | <b>0.0</b>  | 0.0 |   |
| % CD4 of total        | <b>0.2</b>             | 0.2  | 5 | <b>0.4</b>             | 0.2  | 5 | <b>0.7</b>             | 0.3  | 4 | <b>0.8</b>                                          | 0.5 | 4 | <b>0.6</b>                                          | 0.3  | 4 | <b>0.5</b>  | 0.1 | 5 |
| % GFP+ of CD4         | <b>24.8</b>            | 8.1  |   | <b>0.3</b>             | 0.1  |   | <b>20.7</b>            | 12.3 |   | <b>0.2</b>                                          | 0.3 |   | <b>0.2</b>                                          | 0.1  |   | <b>0.0</b>  | 0.0 |   |
| % CD8 of total        | <b>0.4</b>             | 0.8  | 4 | <b>1.9</b>             | 1.1  | 3 | <b>2.4</b>             | 0.5  | 3 | <b>1.7</b>                                          | 0.3 | 4 | <b>1.2</b>                                          | 0.3  | 4 | <b>1.7</b>  | 0.8 | 5 |
| % GFP+ of CD8         | <b>37.4</b>            | 20.8 |   | <b>0.1</b>             | 0.1  |   | <b>5.8</b>             | 1.0  |   | <b>0.0</b>                                          | 0.0 |   | <b>0.0</b>                                          | 0.1  |   | <b>0.0</b>  | 0.0 |   |
| % GFP+ of CD31+CD146+ | <b>85.7</b>            | 7.0  | 3 | <b>0.0</b>             | 0.0  | 4 | <b>0.3</b>             | 0.5  | 6 | <b>89.9</b>                                         | 6.7 | 8 | <b>0.0</b>                                          | 0.0  | 3 | <b>0.0</b>  | 0.0 | 5 |

Percentage of stroma population in relation to total tumour cells, and % recombination as % GFP<sup>+</sup> cells of the respective stroma population is shown. (Means  $\pm$  Standard Deviation). MCA313<sup>IFN $\gamma$ -IND</sup> were grown in WT and PIG x IFN $\gamma$ -R<sup>del</sup> mice backcrossed to the respective Cre-transgenic mouse lines described in 1b. "% of total cells" not given for CD31<sup>+</sup>/CD146<sup>+</sup> cells, since by magnetic enrichment via MACSQuant the relative numbers from the same measurement are not obtained. n = number of tumours analysed.

**Supplementary Table 2 | Gene expression profiling of tumour endothelial cells after exposure to IFN $\gamma$**

Shown are the differentially expressed genes in endothelial cells of J558L<sup>IFN $\gamma$ -GFP-IND</sup> tumours, MCA313<sup>IFN $\gamma$ -IND</sup> tumours (dox-treated vs. untreated) and of 16.113 tumours after treatment with IFN $\gamma^{\text{del}}$  versus WT T cells. Tumour endothelial cells were isolated by fluorescence-activated cell sorting. RNA was isolated and cDNA was synthesized. cDNA was hybridized to Affymetrix MOGENE 2.0 ST arrays. GeneChips were scanned, image data was normalized and quality controlled using Affymetrix software. Bioinformatics analysis of the gene expression data was performed. Shown are relative expression (log fold change) and adjusted p-values.

| Gene name     | MCA313_24h_vs_0h_LogFC | MCA313_24h_vs_0h_adj.P-value | J558_24h_vs_0h_LogFC | J558_24h_v_0h_adj.P-value | T_cell_ifng/-_vs_wt_LogFC | T_cell_ifng/-_vs_wt_adj.P-value | 0h_J558_tumor_vs_kidney_LogFC | 0h_J558_tumor_vs_kidney adj.P-value | Kidney_24h_vs_0h_LogFC | Kidney_24h_vs_0h adj.P-value |
|---------------|------------------------|------------------------------|----------------------|---------------------------|---------------------------|---------------------------------|-------------------------------|-------------------------------------|------------------------|------------------------------|
| 0610005C13Rik | -0,03                  | 0,98069346                   | -0,07                | 0,934592657               | -0,09                     | 0,897233315                     | 0,16                          | 0,762561024                         | 0,11                   | 0,91404265                   |
| 0610007P14Rik | -0,17                  | 0,859564191                  | -0,32                | 0,621731873               | 0,42                      | 0,573830674                     | 0,12                          | 0,840946891                         | -0,57                  | 0,446990293                  |
| 0610009B22Rik | 0,03                   | 0,964894892                  | 0,1                  | 0,89081665                | 0,05                      | 0,9680319                       | 0,24                          | 0,632440348                         | -0,17                  | 0,816652525                  |
| 0610009E02Rik | 0,74                   | 0,557114011                  | -1,52                | 0,077861305               | -0,3                      | 0,830541787                     | 0,73                          | 0,597332937                         | -0,46                  | 0,824727805                  |
| 0610009L18Rik | 0,2                    | 0,717407143                  | 0,29                 | 0,674468926               | 0,03                      | 0,978207511                     | -1,07                         | 0,11586496                          | -0,31                  | 0,77959286                   |
| 0610009O20Rik | 0,25                   | 0,613243355                  | -0,09                | 0,880259895               | -0,14                     | 0,846622244                     | -0,94                         | 0,041009258                         | -0,47                  | 0,444753614                  |
| 0610010F05Rik | 0,41                   | 0,453061353                  | -0,08                | 0,915282997               | 1,56                      | 0,186321498                     | 0,22                          | 0,848431901                         | 0,5                    | 0,671059641                  |
| 0610010K14Rik | 0,26                   | 0,602160482                  | 0,21                 | 0,720667099               | 0,06                      | 0,940543595                     | -0,42                         | 0,212450485                         | 0,05                   | 0,947901649                  |
| 0610011F06Rik | -0,46                  | 0,451795632                  | -0,4                 | 0,525873177               | 0,71                      | 0,273645359                     | -0,5                          | 0,397304103                         | -0,1                   | 0,890797922                  |

|               |       |             |       |             |       |             |       |             |       |             |
|---------------|-------|-------------|-------|-------------|-------|-------------|-------|-------------|-------|-------------|
| 0610012D04Rik | -0,05 | 0,946346081 | 0,14  | 0,771760467 | -0,24 | 0,613433145 | -0,08 | 0,871435673 | 0,08  | 0,905581898 |
| 0610012G03Rik | 0,11  | 0,892124736 | -0,27 | 0,501438027 | 0,32  | 0,633037349 | 0,77  | 0,112183607 | -0,07 | 0,936447878 |
| 0610025J13Rik | -0,02 | 0,985932979 | 0,21  | 0,807175471 | -0,29 | 0,691647896 | -0,26 | 0,504625503 | -0,04 | 0,96738578  |
| 0610030E20Rik | 0,05  | 0,943079514 | 0,33  | 0,654485156 | 0     | 0,997268369 | -0,98 | 0,117584986 | 0,16  | 0,833124162 |
| 0610031O16Rik | -0,08 | 0,892974912 | -0,06 | 0,928134372 | 0,05  | 0,954453764 | 0,18  | 0,578090005 | 0,79  | 0,394654462 |
| 0610037L13Rik | 0,06  | 0,953003466 | 0,08  | 0,972366161 | -0,5  | 0,637962156 | -0,49 | 0,655842156 | 0,07  | 0,954565959 |
| 0610038B21Rik | 0,23  | 0,755116147 | -0,31 | 0,664818804 | -0,2  | 0,880706627 | 0,39  | 0,591139075 | 0,61  | 0,550083777 |
| 0610039K10Rik | 0,31  | 0,610151921 | 0,25  | 0,807175471 | 0,32  | 0,699337799 | 0,48  | 0,831253708 | 0,23  | 0,947559952 |
| 0610040B10Rik | -0,05 | 0,948926586 | -0,01 | 1           | 0,58  | 0,374108836 | -0,4  | 0,840831398 | -0,63 | 0,713744672 |
| 0610040F04Rik | -0,51 | 0,37023946  | -0,07 | 0,949364802 | -0,08 | 0,917137836 | -0,43 | 0,676010477 | 0,19  | 0,8897371   |
| 0610040J01Rik | 0,01  | 0,990894139 | 0,23  | 0,792350281 | -0,56 | 0,419537272 | -0,18 | 0,91199183  | -0,17 | 0,913274952 |
| 0610042G04Rik | -0,04 | 0,942991177 | -0,02 | 0,970832543 | 0,04  | 0,957152002 | 0,12  | 0,750080232 | 0,23  | 0,70345696  |
| 0610043K17Rik | 0,22  | 0,783591449 | 0,22  | 0,700297886 | -0,52 | 0,345258871 | -0,66 | 0,284968897 | 1,11  | 0,185914462 |
| 1010001B22Rik | -0,08 | 0,922118639 | 0,21  | 0,697261844 | -0,13 | 0,890499122 | -0,2  | 0,704099655 | -0,29 | 0,654872635 |
| 1010001N08Rik | 0,16  | 0,718059583 | -0,21 | 0,652687886 | 0,11  | 0,90283613  | -0,3  | 0,374723126 | 0,51  | 0,338315706 |
| 1110001J03Rik | -0,99 | 0,354419277 | -1,35 | 0,424403073 | 0,54  | 0,377624172 | 0,36  | 0,455407679 | -0,06 | 0,975441362 |
| 1110002J07Rik | -0,01 | 0,991919022 | -0,35 | 0,541518605 | 0,04  | 0,968393958 | -0,01 | 0,994269239 | -0,1  | 0,904836805 |
| 1110002L01Rik | -0,74 | 0,179335832 | 0,14  | 0,883145635 | 0,19  | 0,884553705 | -0,11 | 0,964374587 | -0,04 | 0,988324279 |
| 1110004E09Rik | -0,49 | 0,301230942 | -0,2  | 0,886286684 | -0,08 | 0,894239558 | 0,27  | 0,774826947 | 0,16  | 0,899825706 |
| 1110004F10Rik | -0,31 | 0,49964886  | -0,01 | 0,997207127 | 0,17  | 0,86895058  | 0,44  | 0,633611025 | -0,25 | 0,765340194 |
| 1110006O24Rik | 0,42  | 0,503332622 | -0,06 | 0,950660794 | 0,01  | 0,997268369 | 0,37  | 0,550483161 | 0,26  | 0,80577425  |
| 1110008E08Rik | 0,08  | 0,859481811 | -0,12 | 0,827228251 | -0,06 | 0,938864861 | -0,02 | 0,98283761  | -0,03 | 0,979420282 |
| 1110008F13Rik | -0,5  | 0,303126461 | -0,43 | 0,277253387 | 0,66  | 0,440550754 | 0,82  | 0,051116277 | -0,23 | 0,710098871 |
| 1110008L16Rik | 0,09  | 0,958395861 | -0,15 | 0,904258936 | -0,1  | 0,91803923  | 0,49  | 0,669700739 | -0,27 | 0,845218636 |
| 1110008P14Rik | 0,04  | 0,962660554 | 0,03  | 0,974580396 | -0,11 | 0,844258774 | -0,38 | 0,512305128 | -0,27 | 0,736245281 |
| 1110012L19Rik | -0,14 | 0,743136843 | 0,05  | 0,917256002 | -0,07 | 0,936852355 | 0,21  | 0,707902199 | -0,02 | 0,982175252 |
| 1110015O18Rik | -0,16 | 0,755234272 | -0,01 | 0,993789602 | 0,04  | 0,96500395  | -0,04 | 0,922740736 | 0,01  | 0,991628025 |
| 1110017D15Rik | 0,27  | 0,589327047 | 0,33  | 0,508154692 | 0,29  | 0,545465016 | -0,35 | 0,569594794 | -0,53 | 0,6754671   |
| 1110018N20Rik | 0,41  | 0,419591944 | -0,08 | 0,891532732 | -0,31 | 0,509966427 | -1,12 | 0,100777201 | -0,12 | 0,909596996 |
| 1110019D14Rik | -0,08 | 0,90778289  | 0,43  | 0,541301427 | 0,29  | 0,737241227 | -0,33 | 0,709570719 | 0     | 0,99888749  |
| 1110020A21Rik | 0,09  | 0,914758024 | -0,54 | 0,35381781  | -0,05 | 0,960492934 | -0,12 | 0,816912202 | -0,37 | 0,499989818 |
| 1110020C17Rik | -0,04 | 0,950837484 | -0,06 | 0,917821097 | -0,01 | 0,991378753 | -0,14 | 0,726287112 | -0,15 | 0,836715889 |
| 1110025L11Rik | 0,07  | 0,921813401 | -0,05 | 0,935329426 | 0,36  | 0,433585844 | 0,22  | 0,511754943 | -0,08 | 0,927296036 |
| 1110028F11Rik | 0,58  | 0,28720526  | 0,42  | 0,532161121 | -0,02 | 0,985977985 | -0,06 | 0,900529161 | -0,09 | 0,887859063 |
| 1110028F18Rik | 0,26  | 0,631448839 | -0,06 | 0,93451524  | 0,01  | 0,991568687 | 0,12  | 0,742706747 | 0,01  | 0,991980521 |

|               |       |             |       |             |       |             |       |             |       |             |
|---------------|-------|-------------|-------|-------------|-------|-------------|-------|-------------|-------|-------------|
| 1110032A03Rik | -0,32 | 0,718901325 | 0,62  | 0,416087106 | -0,76 | 0,295720005 | -1,33 | 0,027401066 | -1,18 | 0,556366004 |
| 1110032F04Rik | -0,14 | 0,81630789  | -0,3  | 0,646170664 | 0,28  | 0,620837479 | 0,57  | 0,301051081 | 0,2   | 0,832781095 |
| 1110034G24Rik | 0,17  | 0,897717279 | 0,27  | 0,828219939 | -0,52 | 0,412103362 | -0,09 | 0,891253074 | 1,03  | 0,223330086 |
| 1110036E04Rik | 0,12  | 0,899660614 | -0,06 | 0,929692416 | 0,28  | 0,715497532 | 0,07  | 0,948745074 | -0,33 | 0,738412365 |
| 1110037F02Rik | -0,26 | 0,495249753 | -0,37 | 0,661976216 | 0,68  | 0,443772465 | -0,05 | 0,952342947 | -0,27 | 0,674843991 |
| 1110038B12Rik | 0,61  | 0,231101726 | 0,15  | 0,763005394 | -0,38 | 0,683305382 | 0,37  | 0,713579222 | 0,65  | 0,556903104 |
| 1110038F14Rik | 0,53  | 0,172698611 | 0,93  | 0,094366643 | -0,96 | 0,060293803 | -0,2  | 0,718510867 | 0,64  | 0,222441818 |
| 1110046J04Rik | 0,55  | 0,491560172 | 0,23  | 0,705845461 | 0     | 0,999002132 | 1,06  | 0,453365821 | 0,34  | 0,887969996 |
| 1110051M20Rik | -0,06 | 0,950829291 | -0,18 | 0,747707816 | -0,22 | 0,870377336 | -0,09 | 0,943864463 | 0,01  | 0,995298243 |
| 1110057P08Rik | 0,03  | 0,966287119 | -0,22 | 0,69562011  | -0,13 | 0,837489148 | -0,07 | 0,878455911 | 0,04  | 0,956585095 |
| 1110059E24Rik | -0,08 | 0,9231839   | 0,28  | 0,716445657 | 0,04  | 0,977967694 | 0,07  | 0,926535979 | -0,01 | 0,9939542   |
| 1110059G10Rik | 0,1   | 0,892124736 | -0,28 | 0,828464327 | 0,35  | 0,712697139 | -0,56 | 0,204285479 | -0,45 | 0,587013563 |
| 1110065P20Rik | -0,23 | 0,665901437 | -0,14 | 0,804868131 | 0,39  | 0,59595639  | 0,24  | 0,516384455 | -0,27 | 0,591592435 |
| 1190002N15Rik | -0,5  | 0,420942329 | 0,34  | 0,432744348 | -0,04 | 0,971467554 | -0,57 | 0,495340036 | 0,48  | 0,551972106 |
| 1190003K10Rik | -0,14 | 0,854588321 | -0,19 | 0,7296094   | -0,15 | 0,842620973 | -0,51 | 0,266957726 | -0,05 | 0,956610289 |
| 1190005I06Rik | 0,03  | 0,96364139  | -0,06 | 0,885885817 | 0,22  | 0,70387644  | -0,1  | 0,895836916 | 0     | 0,996197742 |
| 1190007I07Rik | -0,51 | 0,275938194 | 0,24  | 0,827496723 | 0     | 0,999846116 | -0,33 | 0,485770197 | -0,42 | 0,551972106 |
| 1200007C13Rik | -0,08 | 0,877096932 | 0,18  | 0,727848017 | 0,13  | 0,868609956 | 0,07  | 0,854613369 | -0,01 | 0,986971861 |
| 1200015M12Rik | 0,3   | 0,481501442 | -0,24 | 0,664787536 | -0,6  | 0,397409278 | 2,45  | 0,02663501  | -0,19 | 0,876418697 |
| 1300002E11Rik | -0,68 | 0,357222153 | -0,26 | 0,841665238 | -0,31 | 0,830336321 | -0,3  | 0,778817721 | 0,39  | 0,684110202 |
| 1300017J02Rik | -0,24 | 0,724976228 | -0,08 | 0,934294134 | -0,08 | 0,932577939 | -0,14 | 0,778212842 | 0,01  | 0,9939542   |
| 1500002C15Rik | 0,19  | 0,840515514 | -0,56 | 0,471355059 | 0,17  | 0,723987482 | -0,08 | 0,961022022 | -0,83 | 0,499287915 |
| 1500002F19Rik | 0,32  | 0,769716601 | 0,01  | 0,996455272 | -0,12 | 0,87140695  | 0,29  | 0,428855564 | -0,15 | 0,945776926 |
| 1500004A13Rik | -0,04 | 0,962660554 | 0,06  | 0,907235638 | 0,08  | 0,909728993 | -0,03 | 0,944802384 | 0,27  | 0,757562438 |
| 1500009C09Rik | 0,18  | 0,701086418 | -0,06 | 0,919762719 | -0,03 | 0,97548193  | 0,05  | 0,914640741 | 0,27  | 0,629938775 |
| 1500009L16Rik | -0,28 | 0,78074129  | 0,53  | 0,453958512 | 0,77  | 0,216706491 | -0,2  | 0,777972613 | -0,86 | 0,275129528 |
| 1500011B03Rik | -0,34 | 0,5976608   | -0,09 | 0,908448947 | -0,24 | 0,800107725 | 1,47  | 0,376960876 | 0,11  | 0,969994712 |
| 1500011K16Rik | -0,01 | 0,984660167 | -0,43 | 0,514781187 | -0,1  | 0,902086463 | -0,17 | 0,779892615 | -0,14 | 0,874717264 |
| 1500012K07Rik | -0,06 | 0,959218841 | 0,38  | 0,690169085 | -0,08 | 0,938771378 | -0,65 | 0,264486163 | -0,27 | 0,739121045 |
| 1500015A07Rik | 0,08  | 0,903666411 | 0     | 1           | -0,4  | 0,532626868 | -0,09 | 0,918795752 | 0,6   | 0,673120647 |
| 1500015L24Rik | 0,05  | 0,948926586 | -0,15 | 0,831647298 | -0,17 | 0,835677021 | 0,13  | 0,861730701 | 0,18  | 0,772124176 |
| 1500015O10Rik | -0,19 | 0,875890831 | 0,24  | 0,794404033 | 0,2   | 0,846795397 | -0,01 | 0,984266596 | -0,18 | 0,884047752 |
| 1500017E21Rik | 0,39  | 0,504073888 | 0,08  | 0,938088718 | -0,32 | 0,556463781 | 0,22  | 0,569727028 | -0,09 | 0,900321652 |
| 1500026H17Rik | 0,04  | 0,964272364 | 0,09  | 0,938485291 | -0,14 | 0,884829622 | -0,64 | 0,079847849 | -0,07 | 0,936775555 |
| 1500035N22Rik | -0,02 | 0,98456417  | -0,21 | 0,686540452 | 0,08  | 0,923781798 | 0,29  | 0,512902457 | 0,23  | 0,701887274 |

|               |       |             |       |             |       |             |       |             |       |             |
|---------------|-------|-------------|-------|-------------|-------|-------------|-------|-------------|-------|-------------|
| 1520401A03Rik | 0,01  | 0,990894139 | 0,11  | 0,927073711 | -0,42 | 0,598076555 | 0,64  | 0,391671251 | 0,31  | 0,743424157 |
| 1600002D24Rik | -0,01 | 0,993728727 | 0,27  | 0,824372931 | 0,3   | 0,640924712 | 0,26  | 0,65757228  | 0,01  | 0,991980521 |
| 1600002H07Rik | -0,4  | 0,404788556 | 0,15  | 0,906678859 | 0,03  | 0,976522658 | -0,13 | 0,847627021 | -0,44 | 0,651930786 |
| 1600002K03Rik | 0,05  | 0,959985598 | 0,42  | 0,781665479 | -0,28 | 0,757498725 | -0,17 | 0,777673386 | 0,25  | 0,72895078  |
| 1600010F14Rik | -0,39 | 0,664247638 | 0,33  | 0,53407368  | 0,09  | 0,895434884 | -0,36 | 0,467700021 | -0,15 | 0,877454343 |
| 1600010M07Rik | 0,23  | 0,600246297 | 0,1   | 0,92941827  | -0,17 | 0,772008734 | -0,02 | 0,959958662 | 0,4   | 0,565817768 |
| 1600012H06Rik | -0,34 | 0,446685156 | -0,22 | 0,677128722 | 0,09  | 0,938795886 | 0,45  | 0,46207446  | -0,03 | 0,981913783 |
| 1600012P17Rik | 0,07  | 0,954517543 | 0,02  | 0,984812702 | 0,07  | 0,92807676  | -0,07 | 0,942937835 | -0,04 | 0,968952017 |
| 1600014C10Rik | 0,16  | 0,839471353 | 0,8   | 0,138139271 | -0,3  | 0,777810365 | 0,25  | 0,656052937 | 0,7   | 0,337960521 |
| 1600014C23Rik | 0,01  | 0,99461916  | -0,14 | 0,78645186  | 0,04  | 0,9617386   | 0,15  | 0,774826947 | 0,01  | 0,992864414 |
| 1600015I10Rik | -0,4  | 0,424894511 | 0,04  | 0,971464245 | -0,29 | 0,600469932 | 0,16  | 0,772670973 | 0,06  | 0,95750634  |
| 1600019K03Rik | -0,24 | 0,606922012 | 0,16  | 0,867265251 | 0,2   | 0,776930578 | 0,15  | 0,811187324 | 0,36  | 0,546863793 |
| 1600020E01Rik | 0,61  | 0,333403216 | 0,29  | 0,728434379 | 0,05  | 0,967767582 | -0,89 | 0,055073402 | 0,21  | 0,765809384 |
| 1600025M17Rik | 0,19  | 0,773711275 | -0,08 | 0,928134372 | 0,01  | 0,997268369 | -0,05 | 0,963591485 | -0,07 | 0,953297732 |
| 1600029I14Rik | -0,11 | 0,838220858 | -0,07 | 0,907186434 | -0,03 | 0,973802765 | 0,26  | 0,801235182 | 0,17  | 0,835191    |
| 1600029O15Rik | 0,34  | 0,705014612 | -0,16 | 0,883639748 | -0,53 | 0,337509636 | 0,13  | 0,757184832 | 0,05  | 0,96738578  |
| 1700001C02Rik | 0,46  | 0,605377261 | 0,09  | 0,965413567 | -0,22 | 0,800493831 | -0,65 | 0,388085052 | -0,36 | 0,520240481 |
| 1700001C19Rik | -0,6  | 0,64866902  | -0,94 | 0,490123797 | 0,38  | 0,720069267 | 1,42  | 0,097755932 | -0,07 | 0,950267521 |
| 1700001D01Rik | -0,35 | 0,370100167 | 0,02  | 0,979750716 | -0,16 | 0,858001959 | 0,02  | 0,976294623 | 0,08  | 0,938205574 |
| 1700001F09Rik | -0,19 | 0,764288636 | -0,12 | 0,823407957 | -0,27 | 0,861877024 | -0,22 | 0,746580621 | 0,06  | 0,962574501 |
| 1700001G01Rik | 0,18  | 0,824399257 | 0,35  | 0,473359428 | -0,09 | 0,909963525 | -0,38 | 0,266921098 | 0,15  | 0,889035645 |
| 1700001G11Rik | -0,01 | 0,996219097 | -0,3  | 0,443318093 | 0,08  | 0,918167758 | 0,25  | 0,530719525 | 0,36  | 0,562348217 |
| 1700001G17Rik | 0,28  | 0,78476082  | -0,02 | 0,992024201 | 0,75  | 0,606295906 | -0,35 | 0,668263661 | -0,3  | 0,856900046 |
| 1700001J04Rik | 0,25  | 0,633940882 | 0,13  | 0,902830091 | -0,16 | 0,789396261 | -0,11 | 0,835442904 | 0,22  | 0,744368684 |
| 1700001J11Rik | -0,31 | 0,525854282 | 0,2   | 0,670902144 | -0,09 | 0,906602658 | -0,01 | 0,983166423 | -0,2  | 0,828278125 |
| 1700001K19Rik | 0,17  | 0,793637667 | 0,45  | 0,424805929 | -0,04 | 0,972847253 | -0,93 | 0,295360318 | 0,2   | 0,91964702  |
| 1700001K23Rik | -0,02 | 0,98608257  | 0,03  | 0,985291538 | -0,33 | 0,661089127 | 0,15  | 0,789291893 | 0,04  | 0,960974478 |
| 1700001L05Rik | -0,05 | 0,95290436  | 0,12  | 0,940269529 | -0,35 | 0,750383766 | 0,32  | 0,560982663 | 0,06  | 0,969617491 |
| 1700001L19Rik | 0,01  | 0,994938595 | 0,22  | 0,704681588 | -0,22 | 0,718448905 | 0,11  | 0,853648629 | 0,3   | 0,675830386 |
| 1700001O22Rik | 0,03  | 0,956744159 | -0,34 | 0,703255839 | -0,1  | 0,896728577 | -0,63 | 0,296435377 | -0,51 | 0,469148703 |
| 1700001P01Rik | 0,12  | 0,932531737 | 0,54  | 0,51825831  | 0     | 0,99879674  | 0,6   | 0,270511921 | 0,47  | 0,708898543 |
| 1700003D09Rik | 0,04  | 0,956705598 | 0     | 0,998818332 | -0,24 | 0,726329241 | -0,08 | 0,885417869 | -0,02 | 0,983469081 |
| 1700003E16Rik | 0,26  | 0,742823915 | 0,08  | 0,88212984  | 0,12  | 0,900266142 | 0,28  | 0,715850858 | 0,01  | 0,99505496  |
| 1700003E24Rik | 0,03  | 0,959458865 | 0,18  | 0,719093262 | 0,14  | 0,919116989 | 0,01  | 0,988718521 | 0,09  | 0,918589668 |
| 1700003F12Rik | -0,13 | 0,834672627 | 0,23  | 0,763005394 | 0,16  | 0,868609956 | -0,01 | 0,992906132 | 0,33  | 0,567199217 |

|               |       |             |       |             |       |             |       |             |       |             |
|---------------|-------|-------------|-------|-------------|-------|-------------|-------|-------------|-------|-------------|
| 1700003G13Rik | -0,02 | 0,975949545 | 0,11  | 0,831580851 | 0,1   | 0,878035827 | -0,09 | 0,838825534 | -0,18 | 0,767310323 |
| 1700003G18Rik | 0,13  | 0,892154362 | -0,18 | 0,694017753 | -0,2  | 0,71840079  | -0,13 | 0,845617958 | -0,12 | 0,916128059 |
| 1700003H04Rik | 0,23  | 0,706900702 | 0,06  | 0,980518468 | -0,07 | 0,959505445 | 0,66  | 0,324103294 | 0,61  | 0,586214748 |
| 1700003L19Rik | 0,29  | 0,687662951 | 0,1   | 0,945190369 | -0,6  | 0,278012027 | -0,3  | 0,523334515 | 0,14  | 0,86229485  |
| 1700003M07Rik | 0,52  | 0,600861507 | 0,26  | 0,682018994 | -0,15 | 0,818595679 | -0,35 | 0,477972946 | 0,48  | 0,418941717 |
| 1700003P14Rik | -0,21 | 0,656034838 | 0,26  | 0,578145584 | -0,07 | 0,922971065 | 0,11  | 0,754460294 | 0,14  | 0,87343011  |
| 1700006A11Rik | -0,51 | 0,372219772 | 0,21  | 0,629493333 | -0,16 | 0,832199519 | -0,07 | 0,939024066 | -0,1  | 0,939127163 |
| 1700006E09Rik | -0,04 | 0,948926586 | 0,11  | 0,912379377 | -0,16 | 0,789802954 | -0,24 | 0,551726228 | 0     | 0,995682364 |
| 1700006F04Rik | 0,15  | 0,838208309 | 0,19  | 0,832369851 | -0,48 | 0,465281406 | -0,29 | 0,738799802 | 0,15  | 0,910083563 |
| 1700006H21Rik | 0,03  | 0,972736855 | 0,2   | 0,821227978 | -0,21 | 0,688126003 | -0,08 | 0,927360713 | -0,1  | 0,940149515 |
| 1700006J14Rik | -0,69 | 0,325246268 | -0,03 | 0,994137877 | -0,3  | 0,666305832 | 0,57  | 0,515908704 | 0,42  | 0,715879151 |
| 1700007B14Rik | -0,53 | 0,312439966 | 0,5   | 0,490741614 | -0,36 | 0,663029337 | -0,27 | 0,418568872 | 0,09  | 0,89529118  |
| 1700007E05Rik | -0,17 | 0,867243066 | -0,14 | 0,74760299  | 0,28  | 0,707447086 | 0,73  | 0,265954717 | 0,61  | 0,498598092 |
| 1700007F19Rik | -0,23 | 0,682574629 | -0,09 | 0,903214753 | 0,02  | 0,987003605 | -0,06 | 0,908141892 | 0,08  | 0,939448119 |
| 1700007G11Rik | 0,38  | 0,327393932 | 0,1   | 0,84526289  | -0,03 | 0,982305856 | -0,49 | 0,315746559 | -0,19 | 0,824725869 |
| 1700007J10Rik | 0,33  | 0,663318436 | 0,07  | 0,932628106 | -0,07 | 0,921956183 | 0,03  | 0,959165274 | 0,01  | 0,994270272 |
| 1700007K09Rik | 0,14  | 0,844531783 | 0,06  | 0,958314419 | 0,08  | 0,904057901 | -0,23 | 0,500410075 | 0,02  | 0,983784263 |
| 1700007K13Rik | 0,45  | 0,597519827 | 0,45  | 0,702254725 | 0,11  | 0,91344763  | -0,16 | 0,655780295 | -0,22 | 0,697757911 |
| 1700007L15Rik | 0     | 0,999549745 | -0,11 | 0,839283725 | -0,03 | 0,980815071 | -0,02 | 0,961123444 | -0,13 | 0,845351686 |
| 1700007M16Rik | 0,15  | 0,794174532 | 0,09  | 0,859295689 | -0,08 | 0,914320423 | -0,09 | 0,820103742 | -0,14 | 0,85508146  |
| 1700007P06Rik | 0,12  | 0,784951771 | -0,16 | 0,762295026 | 0,22  | 0,747847718 | -0,04 | 0,954910308 | 0,22  | 0,726042963 |
| 1700008J07Rik | -0,36 | 0,597082878 | 0,32  | 0,518546531 | 0,01  | 0,995401448 | -0,44 | 0,371690362 | -0,08 | 0,944668238 |
| 1700008K24Rik | 0,23  | 0,689725397 | 0,23  | 0,808498635 | -0,13 | 0,880706627 | -0,14 | 0,87811903  | 0,29  | 0,734821787 |
| 1700008O03Rik | 0,39  | 0,465553333 | 0,25  | 0,687235749 | 0,16  | 0,894229514 | 0,15  | 0,884352208 | -0,06 | 0,963190583 |
| 1700008P02Rik | 0,06  | 0,932354771 | 0,17  | 0,678753304 | -0,32 | 0,503838324 | -0,29 | 0,41423684  | -0,03 | 0,973428839 |
| 1700009C05Rik | -0,07 | 0,943079514 | 0,44  | 0,629493333 | -0,3  | 0,58672573  | 0,2   | 0,635869722 | -0,18 | 0,823098095 |
| 1700009J07Rik | -0,13 | 0,820785667 | 0,11  | 0,843698635 | 0,07  | 0,914134206 | 0,22  | 0,607023631 | 0,16  | 0,818825401 |
| 1700009N14Rik | 0,19  | 0,662416763 | 0,14  | 0,853569707 | -0,29 | 0,705820501 | 0,26  | 0,650323576 | 0,48  | 0,475893781 |
| 1700010B08Rik | 0,38  | 0,595245851 | -0,02 | 0,994137877 | 0,09  | 0,919754592 | -0,21 | 0,680412411 | -0,5  | 0,377059128 |
| 1700010B13Rik | -0,1  | 0,816465857 | 0,3   | 0,598307698 | -0,13 | 0,852249671 | -0,34 | 0,331002618 | -0,07 | 0,955499131 |
| 1700010H22Rik | 0,04  | 0,947630317 | -0,03 | 0,961939203 | -0,42 | 0,404120029 | 0,06  | 0,886149988 | -0,08 | 0,929300486 |
| 1700010I02Rik | 0,07  | 0,908636374 | -0,08 | 0,904698551 | -0,02 | 0,984655026 | 0,16  | 0,612106507 | 0,11  | 0,884248437 |
| 1700010I14Rik | -0,25 | 0,758094656 | 0,51  | 0,746613401 | 0,31  | 0,76370647  | -0,07 | 0,968211182 | 0,36  | 0,765809384 |
| 1700010J16Rik | 0,35  | 0,436086286 | -0,11 | 0,827496723 | -0,01 | 0,997220401 | 0,29  | 0,538165751 | 0,17  | 0,858111751 |
| 1700010K23Rik | -0,05 | 0,945461182 | 0,43  | 0,424031137 | -0,12 | 0,854115638 | -0,52 | 0,340897191 | 0,09  | 0,893064058 |

|               |       |             |       |             |       |             |       |             |       |             |
|---------------|-------|-------------|-------|-------------|-------|-------------|-------|-------------|-------|-------------|
| 1700010K24Rik | 0,27  | 0,476711439 | 0,11  | 0,856600114 | -0,02 | 0,982648972 | 0,18  | 0,695751747 | 0,29  | 0,673145862 |
| 1700010L04Rik | -0,12 | 0,854564641 | -0,26 | 0,837035571 | -0,03 | 0,973802765 | -0,3  | 0,687014375 | 0,23  | 0,751268314 |
| 1700011A15Rik | 0,33  | 0,433469829 | 0,23  | 0,699281555 | 0,27  | 0,725190648 | 0,15  | 0,690659674 | 0,05  | 0,96414204  |
| 1700011B04Rik | 0,13  | 0,793209485 | 0,2   | 0,758387553 | -0,14 | 0,816081776 | -0,29 | 0,483390695 | 0,32  | 0,573593985 |
| 1700011E24Rik | -0,07 | 0,937878545 | -0,12 | 0,84748177  | -0,15 | 0,904057901 | 0,39  | 0,473552953 | 0,25  | 0,6754671   |
| 1700011H14Rik | 0     | 0,997888714 | -0,15 | 0,781665479 | 0,13  | 0,867152476 | -1,84 | 0,022522121 | -0,91 | 0,272986942 |
| 1700011I03Rik | -0,12 | 0,833900133 | -0,35 | 0,754578715 | 0,15  | 0,848462153 | -0,06 | 0,90213506  | 0,15  | 0,835191    |
| 1700011L22Rik | 0,37  | 0,472544689 | -0,08 | 0,946182573 | -0,28 | 0,535260652 | 0,14  | 0,77238043  | -0,17 | 0,840952901 |
| 1700011M02Rik | -0,12 | 0,897455401 | 0,16  | 0,727848017 | -0,45 | 0,340783964 | -0,19 | 0,768036061 | -0,24 | 0,819345755 |
| 1700012A03Rik | -0,04 | 0,948376096 | -0,16 | 0,863033637 | 0,1   | 0,887446966 | -0,11 | 0,894288849 | 0,21  | 0,745574572 |
| 1700012B07Rik | -0,27 | 0,546026761 | 0,23  | 0,786640757 | -0,54 | 0,484247864 | -0,17 | 0,857066028 | 0,04  | 0,978604922 |
| 1700012B09Rik | 0,17  | 0,879087883 | -0,2  | 0,789445098 | 0,05  | 0,971479752 | 0,16  | 0,730754402 | 0,09  | 0,919558406 |
| 1700012C14Rik | -0,04 | 0,953324702 | -0,4  | 0,424068004 | 0,34  | 0,504588394 | 0,21  | 0,583447596 | -0,04 | 0,9651757   |
| 1700012D01Rik | 0,32  | 0,723283046 | 0,56  | 0,732044571 | -0,35 | 0,600488294 | -0,87 | 0,392145468 | 0,86  | 0,252802304 |
| 1700012D14Rik | -0,58 | 0,771904131 | 0,1   | 0,938944149 | 0,74  | 0,36121902  | -2,53 | 0,009344805 | -0,08 | 0,927536545 |
| 1700012I11Rik | -0,15 | 0,829299665 | 0,31  | 0,765325717 | -0,24 | 0,725191296 | -0,38 | 0,534925304 | -0,27 | 0,739121045 |
| 1700012L04Rik | 0,34  | 0,496123406 | -0,01 | 0,994608602 | -0,22 | 0,716743339 | -0,16 | 0,699454706 | -0,26 | 0,682929195 |
| 1700012P22Rik | -0,13 | 0,822107047 | 0,04  | 0,956555856 | 0,06  | 0,955049676 | 0,26  | 0,572577303 | 0,17  | 0,792343964 |
| 1700013D24Rik | -0,05 | 0,932061055 | 0,31  | 0,571667144 | 0,25  | 0,84859269  | -0,35 | 0,537315465 | 0,11  | 0,907121694 |
| 1700013F07Rik | -0,03 | 0,964154899 | 0,15  | 0,763005394 | 0,13  | 0,854432422 | 0,02  | 0,981332523 | 0,11  | 0,907249663 |
| 1700013G24Rik | 0,27  | 0,680520303 | -0,1  | 0,824372931 | -0,03 | 0,983471086 | 0,07  | 0,909976349 | -0,41 | 0,535065209 |
| 1700013H16Rik | 0,28  | 0,534498513 | -0,35 | 0,510894317 | 0,13  | 0,861307315 | 0,18  | 0,823963621 | -0,13 | 0,887943873 |
| 1700013N06Rik | -0,31 | 0,597519827 | 0,19  | 0,810470037 | -0,01 | 0,990836784 | -0,11 | 0,886445412 | 0,2   | 0,791694696 |
| 1700015E13Rik | 0,37  | 0,370574974 | 0,02  | 0,994137877 | -0,18 | 0,82162081  | 0,01  | 0,999054177 | -0,48 | 0,606912008 |
| 1700015F17Rik | 0,06  | 0,94881239  | 0,45  | 0,472167576 | 0,02  | 0,987584135 | -0,13 | 0,734587328 | -0,04 | 0,96738578  |
| 1700015G11Rik | -0,03 | 0,975949545 | 0,14  | 0,867265251 | -0,13 | 0,832199519 | -0,29 | 0,680503649 | 0,19  | 0,794273741 |
| 1700015O11Rik | 0,52  | 0,321181267 | -0,28 | 0,58591598  | -0,07 | 0,936053792 | 0,43  | 0,243126142 | 0,54  | 0,258378279 |
| 1700016C15Rik | 0,04  | 0,955200574 | 0,15  | 0,825192868 | -0,09 | 0,899913569 | -0,3  | 0,490353906 | 0,17  | 0,826379382 |
| 1700016D06Rik | -0,28 | 0,544177375 | -0,14 | 0,860602717 | -0,18 | 0,712697139 | 0,14  | 0,849346065 | 0,1   | 0,910083563 |
| 1700016G14Rik | 0,08  | 0,856375297 | -0,01 | 0,989521494 | -0,02 | 0,975448682 | -0,23 | 0,469374878 | 0     | 0,996463857 |
| 1700016G22Rik | -0,3  | 0,594945461 | 0     | 1           | 0,32  | 0,618711263 | -0,93 | 0,33154626  | 0,68  | 0,561628849 |
| 1700016H13Rik | 0,4   | 0,473648333 | 0,24  | 0,559617305 | -0,16 | 0,823823322 | 0,27  | 0,532480497 | 0,5   | 0,393153734 |
| 1700016K19Rik | 0,12  | 0,816534187 | 0,48  | 0,426168855 | -0,24 | 0,659555232 | -0,31 | 0,502094633 | 0,09  | 0,902540251 |
| 1700016L04Rik | -0,24 | 0,59553883  | 0,02  | 0,979002922 | -0,16 | 0,794194778 | -0,05 | 0,932315462 | 0,08  | 0,918865935 |
| 1700016L21Rik | 0,09  | 0,877096932 | -0,27 | 0,774278866 | -0,1  | 0,922971065 | 0,19  | 0,824364287 | 0,23  | 0,830268209 |



|               |       |             |       |             |       |             |       |             |       |             |
|---------------|-------|-------------|-------|-------------|-------|-------------|-------|-------------|-------|-------------|
| 1700016P03Rik | 0,23  | 0,697992827 | 0,54  | 0,742730285 | 0,27  | 0,704279802 | -1,95 | 0,085135828 | -0,22 | 0,843383597 |
| 1700016P04Rik | 0,06  | 0,937251448 | -0,05 | 0,921249611 | -0,08 | 0,903366838 | 0,02  | 0,963752888 | -0,02 | 0,984125319 |
| 1700017B05Rik | -0,51 | 0,378158452 | -0,18 | 0,760679726 | 0,74  | 0,378741497 | 1,01  | 0,087686967 | 0,32  | 0,753328965 |
| 1700017D01Rik | 0,17  | 0,739893701 | 0,16  | 0,807175471 | -0,4  | 0,49657001  | -0,21 | 0,671991774 | -0,17 | 0,779162003 |
| 1700017G19Rik | 0,11  | 0,844505959 | 0,14  | 0,75380926  | -0,18 | 0,74662944  | 0,23  | 0,729857506 | 0,12  | 0,880202418 |
| 1700017J07Rik | -0,03 | 0,965703244 | -0,05 | 0,922703368 | -0,42 | 0,683285574 | 0,14  | 0,760770274 | -0,07 | 0,934344891 |
| 1700017N19Rik | -0,04 | 0,948926586 | 0,19  | 0,829238025 | -0,15 | 0,801482277 | -0,18 | 0,785767773 | 0,17  | 0,853800738 |
| 1700018A04Rik | -0,01 | 0,991789918 | -0,6  | 0,418712141 | 0,09  | 0,890473147 | 0,65  | 0,060562357 | 0,2   | 0,744316995 |
| 1700018A14Rik | -0,06 | 0,915348445 | 0,06  | 0,902148738 | -0,26 | 0,624057916 | 0,32  | 0,471733727 | 0     | 0,999522712 |
| 1700018B08Rik | 0,16  | 0,7914678   | 0,08  | 0,894022563 | 0,11  | 0,898935616 | -0,18 | 0,692483691 | 0,09  | 0,908325715 |
| 1700018B24Rik | 0,24  | 0,690823898 | 0,15  | 0,826290896 | 0,09  | 0,941256033 | 0,35  | 0,622236905 | 0,29  | 0,78512653  |
| 1700018C11Rik | -0,31 | 0,449740126 | 0,32  | 0,664787536 | 0,07  | 0,935986892 | 0,2   | 0,67828223  | 0,49  | 0,433531721 |
| 1700018F24Rik | -0,05 | 0,983516046 | -0,64 | 0,599495018 | -0,07 | 0,922971065 | 0,15  | 0,893255574 | 0,42  | 0,690741737 |
| 1700018G05Rik | -0,24 | 0,598965932 | 0,12  | 0,868839934 | -0,23 | 0,774812688 | 0,06  | 0,935478757 | 0     | 0,999956454 |
| 1700018L02Rik | -0,06 | 0,914090929 | 0,04  | 0,940046211 | 0,04  | 0,950725218 | -0,14 | 0,791822555 | -0,15 | 0,868660245 |
| 1700019A02Rik | 0,14  | 0,806884829 | -0,2  | 0,807175471 | 0,05  | 0,946201063 | 0,02  | 0,974617862 | -0,03 | 0,975441362 |
| 1700019B03Rik | 0,11  | 0,830031987 | 0,92  | 0,314703215 | -0,1  | 0,939684708 | -0,08 | 0,893641164 | -0,14 | 0,878456345 |
| 1700019B21Rik | 0,2   | 0,678433901 | 0,51  | 0,49125334  | -0,16 | 0,797537534 | -0,06 | 0,897792452 | -0,26 | 0,724432778 |
| 1700019D03Rik | 0,35  | 0,434641897 | -0,27 | 0,738762579 | -0,45 | 0,446493846 | -0,47 | 0,257431881 | 0,16  | 0,839969557 |
| 1700019E08Rik | 0,14  | 0,738714467 | -0,05 | 0,961709816 | -0,01 | 0,990293767 | 0,02  | 0,981203009 | -0,05 | 0,948117662 |
| 1700019G24Rik | -0,57 | 0,222236104 | -0,25 | 0,664502462 | -0,07 | 0,938771378 | 0,16  | 0,741608871 | 0,09  | 0,892355748 |
| 1700019M22Rik | 0,25  | 0,713609161 | -0,38 | 0,728434379 | 0,07  | 0,94940954  | 0,25  | 0,540991857 | -0,18 | 0,84970727  |
| 1700019N19Rik | 0,16  | 0,841584453 | -0,16 | 0,82505545  | -0,07 | 0,936840991 | 0,1   | 0,807561855 | -0,15 | 0,878966527 |
| 1700019O17Rik | -0,08 | 0,864526424 | -0,01 | 0,989873399 | -0,15 | 0,785858646 | 0,22  | 0,483188822 | -0,02 | 0,97994127  |
| 1700019P21Rik | 0,04  | 0,944969851 | 0,23  | 0,637452806 | 0,02  | 0,984778342 | -0,06 | 0,936549959 | -0,09 | 0,917075631 |
| 1700020A23Rik | 0,09  | 0,891309235 | -0,04 | 0,952937385 | 0,43  | 0,725191296 | 0,08  | 0,914828446 | 0,01  | 0,991437885 |
| 1700020D05Rik | 0,07  | 0,903817676 | -0,02 | 0,98459889  | 0,08  | 0,880706627 | -0,57 | 0,186919907 | -0,22 | 0,719430166 |
| 1700020G17Rik | 0,18  | 0,691942071 | 0,35  | 0,671319666 | 0,04  | 0,958851839 | 0,25  | 0,648473202 | 0,34  | 0,731527639 |
| 1700020I14Rik | 0,01  | 0,992615147 | -0,29 | 0,552962413 | -0,48 | 0,37686469  | 0,23  | 0,599626473 | -0,27 | 0,699060093 |
| 1700020L24Rik | -0,08 | 0,902861556 | 0,36  | 0,618087796 | -0,22 | 0,821229302 | -0,24 | 0,597332937 | -0,31 | 0,621590361 |
| 1700020M21Rik | 0,27  | 0,648798662 | 0,15  | 0,715625699 | 0,55  | 0,475944471 | -0,45 | 0,169830178 | 0,21  | 0,772721451 |
| 1700020N01Rik | -0,06 | 0,954930706 | -0,23 | 0,672956641 | -0,52 | 0,421026326 | 0,1   | 0,765492742 | 0,14  | 0,847312006 |
| 1700020N15Rik | 0,24  | 0,589783488 | 0     | 1           | -0,18 | 0,904057901 | -0,45 | 0,473389984 | 0,06  | 0,949544475 |
| 1700020N18Rik | 0,07  | 0,922591969 | 0,34  | 0,540711    | -0,04 | 0,965775869 | 0,31  | 0,6876055   | 0,14  | 0,909596996 |
| 1700021A07Rik | -0,17 | 0,67806773  | 0,21  | 0,834508568 | 0,1   | 0,903119522 | 0,12  | 0,845813504 | -0,11 | 0,887784388 |

|               |       |             |       |             |       |             |       |             |       |             |
|---------------|-------|-------------|-------|-------------|-------|-------------|-------|-------------|-------|-------------|
| 1700021F05Rik | -0,08 | 0,895359408 | -0,02 | 0,972150454 | -0,12 | 0,87140695  | 0,14  | 0,827764222 | 0,12  | 0,92425943  |
| 1700021F07Rik | 0,24  | 0,676800971 | 0,45  | 0,402332077 | -0,48 | 0,350153743 | 0,08  | 0,909873635 | 0,02  | 0,97934071  |
| 1700021J08Rik | 0,19  | 0,728739942 | 0,1   | 0,880892852 | 0,03  | 0,97548193  | -0,15 | 0,812048135 | -0,5  | 0,47367248  |
| 1700021L23Rik | 0,36  | 0,357233557 | 0     | 1           | -0,01 | 0,995401448 | -0,01 | 0,988205241 | 0,17  | 0,860292816 |
| 1700021N21Rik | -0,05 | 0,960597621 | 0,01  | 0,996333613 | -0,1  | 0,884861819 | -0,06 | 0,920640884 | -0,06 | 0,947559952 |
| 1700021P04Rik | 0,22  | 0,673516656 | -0,03 | 0,966717367 | -0,19 | 0,741623367 | 0,02  | 0,969257044 | 0,12  | 0,868660245 |
| 1700022A21Rik | 0,11  | 0,867243066 | -0,13 | 0,817110093 | -0,08 | 0,915447788 | -0,05 | 0,908792069 | -0,07 | 0,939339071 |
| 1700022A22Rik | 0,16  | 0,695313784 | 0,24  | 0,551120107 | 0     | 0,996414422 | -0,11 | 0,818711104 | 0,06  | 0,951471487 |
| 1700022E09Rik | 0,33  | 0,655952547 | -0,22 | 0,65041955  | -0,05 | 0,939026015 | 0,19  | 0,766983048 | -0,09 | 0,917030581 |
| 1700022H16Rik | 0,27  | 0,480319644 | -0,16 | 0,816543137 | -0,28 | 0,64045424  | 0,01  | 0,986721193 | 0,09  | 0,909363599 |
| 1700022I11Rik | 0,04  | 0,950897622 | -0,01 | 0,992929085 | 0,13  | 0,862869965 | -1    | 0,473230276 | -0,59 | 0,712967777 |
| 1700022N22Rik | -0,05 | 0,923749064 | -0,17 | 0,6619882   | 0     | 0,99992754  | 0,06  | 0,877531735 | -0,23 | 0,702558142 |
| 1700023C21Rik | 0,16  | 0,784951771 | 0,29  | 0,639419375 | -0,1  | 0,868609956 | 0,01  | 0,989498622 | 0,1   | 0,907602054 |
| 1700023F02Rik | -0,02 | 0,973117883 | -0,17 | 0,855632384 | 0,14  | 0,818205188 | 0,14  | 0,825332212 | 0,11  | 0,874342066 |
| 1700023F06Rik | 0,08  | 0,914323958 | -0,3  | 0,752804236 | 0,08  | 0,923350407 | -0,07 | 0,883425466 | 0,01  | 0,990839896 |
| 1700023H06Rik | 0,09  | 0,887422496 | 0,2   | 0,745921616 | -0,55 | 0,465281406 | -0,23 | 0,810508503 | 0,26  | 0,765809384 |
| 1700024B05Rik | 0,08  | 0,878548823 | 0,22  | 0,785153081 | -0,25 | 0,902637441 | 0,27  | 0,603611964 | -0,09 | 0,939448119 |
| 1700024B18Rik | 0,29  | 0,664803559 | -0,17 | 0,832117565 | 0,17  | 0,780072407 | 0,34  | 0,528134657 | 0,23  | 0,807287081 |
| 1700024F13Rik | 0,16  | 0,774822327 | -0,08 | 0,953198116 | -0,11 | 0,902672106 | -0,17 | 0,680884988 | -0,22 | 0,788761628 |
| 1700024F20Rik | 0,08  | 0,89081819  | -0,03 | 0,954343854 | 0,1   | 0,867589536 | -0,64 | 0,098577249 | -0,75 | 0,195288262 |
| 1700024G13Rik | -0,01 | 0,989019536 | -0,09 | 0,931416337 | -0,06 | 0,936840991 | -0,09 | 0,819132612 | 0,17  | 0,807975342 |
| 1700024P04Rik | 0,12  | 0,792192816 | 0,3   | 0,459417799 | 0,08  | 0,90914497  | 0,05  | 0,904662918 | 0,17  | 0,786221459 |
| 1700024P16Rik | 0,37  | 0,417308876 | 0,12  | 0,852455068 | -0,16 | 0,8785896   | 0,25  | 0,534841007 | 0,22  | 0,706206883 |
| 1700025B11Rik | 0,02  | 0,993728727 | 0,13  | 0,902154431 | -0,64 | 0,4814931   | -0,53 | 0,178931682 | -0,27 | 0,642782255 |
| 1700025C18Rik | 0,43  | 0,419591944 | -0,03 | 0,975959817 | -0,35 | 0,616978696 | 0,25  | 0,546561292 | 0,07  | 0,939607682 |
| 1700025D23Rik | 0,19  | 0,744500908 | -0,01 | 0,98859071  | -0,07 | 0,904132011 | -0,04 | 0,926612444 | 0,14  | 0,836061657 |
| 1700025F22Rik | 0,08  | 0,889978058 | 0,21  | 0,703923817 | -0,24 | 0,6410789   | 0,07  | 0,886272776 | -0,04 | 0,960300979 |
| 1700025F24Rik | 0,16  | 0,748619201 | 0,3   | 0,602956592 | -0,1  | 0,854432422 | -0,2  | 0,595510906 | 0,21  | 0,732679577 |
| 1700025G04Rik | 0,01  | 0,993175772 | 0     | 1           | 0,22  | 0,747767515 | 0,47  | 0,570038672 | 0,16  | 0,902638028 |
| 1700025H01Rik | 0,15  | 0,770347758 | 0     | 0,99691664  | -0,07 | 0,920828015 | -0,22 | 0,572579421 | 0,02  | 0,983453096 |
| 1700025K24Rik | 0,03  | 0,970875252 | 0,31  | 0,649611595 | -0,17 | 0,86935713  | 0,14  | 0,830299574 | 0,04  | 0,966951657 |
| 1700025M24Rik | 0,56  | 0,36631183  | 0,38  | 0,41028104  | -0,1  | 0,941627748 | -0,34 | 0,404293645 | -0,25 | 0,665621345 |
| 1700025N21Rik | 0,03  | 0,950669622 | 0,16  | 0,698886888 | -0,06 | 0,930069312 | -0,02 | 0,964356596 | 0,06  | 0,952971656 |
| 1700025N23Rik | 0,29  | 0,797534003 | 0,46  | 0,62956907  | 0,22  | 0,849746747 | -0,57 | 0,394279742 | 0,76  | 0,400708488 |
| 1700025O08Rik | 0,12  | 0,819752457 | -0,12 | 0,869488567 | 0,19  | 0,715166059 | 0,09  | 0,84134133  | 0,17  | 0,784020399 |

|               |       |             |       |             |       |             |       |             |       |             |
|---------------|-------|-------------|-------|-------------|-------|-------------|-------|-------------|-------|-------------|
| 1700026D11Rik | -0,18 | 0,838825457 | -0,15 | 0,89081665  | -0,31 | 0,628427952 | -0,19 | 0,556481849 | -0,05 | 0,953744167 |
| 1700026F02Rik | 0,14  | 0,755100499 | 0,32  | 0,647475869 | -0,4  | 0,398303268 | 0,1   | 0,830247309 | 0,6   | 0,311282724 |
| 1700026J12Rik | -0,14 | 0,813220024 | -0,02 | 0,982332924 | -0,12 | 0,905209657 | 0,17  | 0,665933714 | 0,12  | 0,861056054 |
| 1700026J14Rik | 0,14  | 0,7818044   | -0,09 | 0,87981455  | -0,26 | 0,665715167 | -0,14 | 0,685305109 | 0,11  | 0,877669996 |
| 1700026L06Rik | -0,22 | 0,656034838 | 0,14  | 0,817367084 | 0,16  | 0,837177015 | 0,24  | 0,648081222 | 0,13  | 0,890957032 |
| 1700027A07Rik | -0,08 | 0,869565514 | 0,32  | 0,487097639 | -0,21 | 0,688643408 | -0,18 | 0,596699221 | 0,07  | 0,948163009 |
| 1700027A15Rik | 0,22  | 0,681657169 | -0,2  | 0,846706536 | -0,15 | 0,809137779 | 0,26  | 0,712887618 | 0,34  | 0,518659138 |
| 1700027F09Rik | 0,01  | 0,993728727 | 0,23  | 0,606605405 | -0,02 | 0,978012085 | -0,18 | 0,662721978 | -0,31 | 0,529853591 |
| 1700027H10Rik | 0,29  | 0,61660035  | -0,02 | 0,984812702 | -0,13 | 0,834069966 | -0,15 | 0,722601477 | 0,23  | 0,823191628 |
| 1700027I24Rik | 0,07  | 0,976870178 | -1,09 | 0,450692213 | 0,15  | 0,861307315 | 0,82  | 0,536344767 | -0,48 | 0,55605211  |
| 1700027J07Rik | 0     | 0,999288019 | -0,05 | 0,92585897  | -0,43 | 0,277822049 | -0,05 | 0,950435641 | 0,04  | 0,976743304 |
| 1700028B04Rik | 0,07  | 0,899359458 | -0,01 | 0,991507752 | -0,1  | 0,896223208 | -0,1  | 0,806596364 | 0,44  | 0,503212672 |
| 1700028D13Rik | -0,56 | 0,433061959 | -0,72 | 0,362188015 | -0,21 | 0,791940256 | 0,12  | 0,818693228 | 0,1   | 0,92741476  |
| 1700028E10Rik | 0,35  | 0,740087572 | 0,07  | 0,971118451 | -0,51 | 0,506787649 | -0,39 | 0,42854479  | 0,07  | 0,962959172 |
| 1700028I16Rik | 0,16  | 0,891730562 | 0,43  | 0,367816638 | 0,1   | 0,903366838 | -0,32 | 0,498372058 | -0,16 | 0,858872204 |
| 1700028J19Rik | -0,06 | 0,964154899 | -0,17 | 0,800067055 | 0,36  | 0,709317317 | 0,29  | 0,720492101 | -0,72 | 0,393448838 |
| 1700028K03Rik | 0,15  | 0,8347788   | 0,38  | 0,683412015 | -0,43 | 0,399470425 | -0,21 | 0,745782308 | -0,56 | 0,38432665  |
| 1700028M03Rik | -0,06 | 0,918891606 | 0,31  | 0,709977463 | -0,13 | 0,834069966 | 0     | 0,999809258 | 0,11  | 0,90813354  |
| 1700028N14Rik | -0,2  | 0,875890831 | -0,97 | 0,693547757 | -0,89 | 0,433353965 | -1,01 | 0,359236888 | -0,39 | 0,792404969 |
| 1700028P14Rik | 0,19  | 0,808947569 | -0,17 | 0,729741948 | -0,08 | 0,911628908 | 0,27  | 0,602479929 | 0,21  | 0,734575767 |
| 1700028P15Rik | 0,07  | 0,928103232 | -0,04 | 0,985151214 | -0,19 | 0,786838878 | -0,11 | 0,907439841 | 0,04  | 0,973162988 |
| 1700029B22Rik | 0,13  | 0,834881357 | -0,18 | 0,795258708 | 0     | 0,999931921 | 0,4   | 0,228384791 | 0,22  | 0,715879151 |
| 1700029E06Rik | -0,05 | 0,942119638 | -0,15 | 0,765325717 | -0,04 | 0,955984004 | -0,06 | 0,900918368 | -0,03 | 0,979456872 |
| 1700029F12Rik | 0,66  | 0,324263351 | 0,51  | 0,643955364 | -0,54 | 0,30182317  | -0,3  | 0,654567375 | 0,13  | 0,940438527 |
| 1700029H14Rik | 0,15  | 0,840218728 | 0,55  | 0,389273523 | 0,02  | 0,989491273 | 0,26  | 0,690659674 | 0,28  | 0,726042963 |
| 1700029I15Rik | 0,17  | 0,869225685 | 0,18  | 0,880107273 | 0,36  | 0,628978443 | -0,3  | 0,647230442 | 0,07  | 0,967325392 |
| 1700029J03Rik | 0,09  | 0,869565514 | 0,18  | 0,855632384 | 0,31  | 0,631855861 | -0,2  | 0,697336477 | -0,08 | 0,912250982 |
| 1700029J07Rik | 0,32  | 0,680520303 | 0,35  | 0,638366221 | -0,6  | 0,426442479 | -0,84 | 0,353513451 | 0,32  | 0,784872568 |
| 1700029M03Rik | -0,11 | 0,785400637 | -0,02 | 0,980518468 | -0,16 | 0,775492921 | -0,01 | 0,991453278 | 0,15  | 0,835191    |
| 1700029M20Rik | -0,17 | 0,661945783 | 0,11  | 0,794404033 | 0,17  | 0,844191447 | 0,07  | 0,903739255 | -0,06 | 0,953502969 |
| 1700029N11Rik | 0,09  | 0,900167606 | -0,19 | 0,809967664 | -0,32 | 0,70398922  | 0,03  | 0,966701307 | 0,41  | 0,444327869 |
| 1700029P11Rik | 0,1   | 0,903268859 | -0,65 | 0,503302069 | 0,05  | 0,958214619 | 0,3   | 0,571686947 | 0,1   | 0,91314596  |
| 1700030A11Rik | 0,29  | 0,460231397 | -0,12 | 0,823530278 | 0,29  | 0,680612866 | 0,13  | 0,786955272 | 0,14  | 0,878914713 |
| 1700030C10Rik | 0,22  | 0,851543807 | -0,2  | 0,695689103 | -0,17 | 0,806102885 | 0,06  | 0,898626578 | -0,17 | 0,823098095 |
| 1700030C12Rik | -0,01 | 0,991919022 | -0,25 | 0,839277519 | 0,08  | 0,911921787 | -0,13 | 0,85567266  | 0,27  | 0,694233384 |

|               |       |             |       |             |       |             |       |             |       |             |
|---------------|-------|-------------|-------|-------------|-------|-------------|-------|-------------|-------|-------------|
| 1700030C14Rik | 0,15  | 0,771381752 | -0,09 | 0,876503933 | 0,1   | 0,906602658 | -0,17 | 0,773739766 | -0,41 | 0,476763678 |
| 1700030F04Rik | -0,04 | 0,970938013 | -0,07 | 0,935329426 | -0,42 | 0,516309915 | -0,11 | 0,839333217 | -0,25 | 0,763240477 |
| 1700030F18Rik | 0,14  | 0,867243066 | 0,11  | 0,896581126 | -0,42 | 0,379231825 | -0,09 | 0,88824149  | 0,05  | 0,955654991 |
| 1700030J22Rik | -0,14 | 0,803761785 | 0,09  | 0,9537156   | 0,22  | 0,661089127 | -0,12 | 0,89901572  | -0,15 | 0,911850421 |
| 1700030K09Rik | -0,08 | 0,932324918 | 0,16  | 0,83095935  | -0,27 | 0,660610212 | -0,08 | 0,901423712 | 0,31  | 0,677687906 |
| 1700030L20Rik | 0,12  | 0,820023436 | 0,05  | 0,958856577 | 0,04  | 0,964493666 | 0,07  | 0,903138764 | 0,19  | 0,788112596 |
| 1700030M09Rik | 0,31  | 0,493929    | 0,16  | 0,788759447 | -0,48 | 0,305948438 | -0,07 | 0,91319766  | 0,02  | 0,991628025 |
| 1700030N03Rik | -0,09 | 0,856118781 | 0,05  | 0,926157704 | 0,17  | 0,806102885 | -0,04 | 0,925262953 | -0,02 | 0,982816728 |
| 1700030O20Rik | 0,14  | 0,915575695 | 0,07  | 0,928402591 | 0,1   | 0,90672161  | -0,11 | 0,880931781 | 0,07  | 0,938113617 |
| 1700031A10Rik | 0,46  | 0,354776657 | 0,3   | 0,697570036 | -0,17 | 0,851593229 | 0,25  | 0,798893106 | 0,56  | 0,461371951 |
| 1700031F05Rik | 0,22  | 0,71735409  | 0,03  | 0,957841921 | -0,29 | 0,588775075 | -0,13 | 0,718323562 | -0,15 | 0,864163536 |
| 1700031F10Rik | 0,04  | 0,950669622 | -0,01 | 0,985764487 | 0,02  | 0,987208663 | 0,11  | 0,768542495 | 0,08  | 0,928724353 |
| 1700031L13Rik | 0,13  | 0,796396177 | 0,01  | 0,995296075 | -0,04 | 0,965703516 | -0,12 | 0,77523305  | 0,05  | 0,951125195 |
| 1700031M16Rik | 0,08  | 0,89081819  | 0,18  | 0,638366221 | -0,01 | 0,997581017 | -0,18 | 0,799360693 | -0,06 | 0,953971867 |
| 1700031P21Rik | -0,11 | 0,829299665 | -0,22 | 0,750555245 | -0,29 | 0,702677589 | 0,55  | 0,450283107 | 0,2   | 0,731211225 |
| 1700034E13Rik | -0,03 | 0,976574175 | 0,22  | 0,767178812 | -0,16 | 0,90672161  | 0,09  | 0,926680685 | 0,32  | 0,679993881 |
| 1700034G24Rik | 0,49  | 0,264937591 | 0,01  | 0,997104363 | -0,3  | 0,599648113 | 0,26  | 0,495340036 | 0,16  | 0,801987865 |
| 1700034H15Rik | 0,16  | 0,906413574 | 0,24  | 0,80678645  | 0,28  | 0,729592327 | 0,19  | 0,640272921 | -0,63 | 0,362275161 |
| 1700034I23Rik | 0,09  | 0,865263482 | -0,42 | 0,463318914 | 0,07  | 0,932986275 | 0,07  | 0,883769238 | 0,37  | 0,545166604 |
| 1700034J04Rik | -0,21 | 0,600589233 | -0,09 | 0,884434898 | 0,21  | 0,720590502 | 0,01  | 0,984136649 | 0,12  | 0,861056054 |
| 1700034J05Rik | 0,16  | 0,750362144 | 0,49  | 0,73495822  | -0,08 | 0,935970536 | -0,12 | 0,784621098 | 0,2   | 0,792305774 |
| 1700034K08Rik | 0,52  | 0,537345693 | 0,21  | 0,728434379 | 0,1   | 0,911634383 | -0,09 | 0,90213506  | 0,24  | 0,767285294 |
| 1700034O15Rik | 0,2   | 0,656726345 | -0,12 | 0,882847123 | -0,09 | 0,905049931 | -0,07 | 0,907108675 | 0,03  | 0,976743304 |
| 1700034P13Rik | 0,18  | 0,725228866 | -0,05 | 0,953198116 | -0,39 | 0,512312279 | 0,26  | 0,392278451 | -0,27 | 0,60404893  |
| 1700036A12Rik | 0,16  | 0,7699479   | 0,08  | 0,952427593 | -0,43 | 0,382532767 | 0,36  | 0,409914151 | 0,21  | 0,791071778 |
| 1700036G14Rik | 0,25  | 0,693610566 | 0,32  | 0,776548278 | -0,22 | 0,836625711 | 0,58  | 0,267042203 | 0,29  | 0,796146369 |
| 1700036O09Rik | 0,08  | 0,865689677 | 0,22  | 0,764289173 | -0,14 | 0,809137779 | -0,11 | 0,765911385 | -0,09 | 0,9013159   |
| 1700037C06Rik | 0,34  | 0,495249753 | 0,09  | 0,906234611 | -0,21 | 0,736837174 | 0,29  | 0,414123109 | 0,16  | 0,7911784   |
| 1700037C18Rik | -0,12 | 0,798689514 | -0,1  | 0,829490026 | 0,19  | 0,817808747 | -0,34 | 0,470901759 | -0,21 | 0,788112596 |
| 1700037F24Rik | -0,06 | 0,909026717 | 0,09  | 0,847943015 | -0,36 | 0,475398917 | -0,01 | 0,983166423 | 0,13  | 0,858314976 |
| 1700037H04Rik | -0,55 | 0,355622782 | -0,71 | 0,36721823  | 0,92  | 0,07304149  | -0,26 | 0,671346789 | 0     | 0,996267405 |
| 1700039E15Rik | 0,14  | 0,810208393 | -0,07 | 0,923044405 | 0,23  | 0,770526999 | 0,37  | 0,635482645 | 0,14  | 0,888182112 |
| 1700039E22Rik | 0,12  | 0,813220024 | -0,17 | 0,859954464 | -0,35 | 0,616978696 | -0,04 | 0,937086421 | -0,09 | 0,925226919 |
| 1700039M10Rik | 0,19  | 0,633889248 | 0,11  | 0,80192513  | -0,07 | 0,926982123 | -0,37 | 0,345009795 | -0,42 | 0,443268905 |
| 1700040D17Rik | -0,06 | 0,90685932  | 0,07  | 0,911148146 | 0,11  | 0,835131237 | -0,01 | 0,981610833 | -0,07 | 0,921873336 |

|                |       |             |       |             |       |             |       |             |       |             |
|----------------|-------|-------------|-------|-------------|-------|-------------|-------|-------------|-------|-------------|
| 1700040F15Rik  | 0,05  | 0,940936429 | 0,33  | 0,540394017 | -0,04 | 0,959437564 | -0,38 | 0,476414891 | 0,19  | 0,840952901 |
| 1700040F17Rik  | 0,08  | 0,897717279 | 0,03  | 0,950643414 | -0,16 | 0,757498725 | 0,22  | 0,647770751 | 0,4   | 0,487064794 |
| 1700040L02Rik  | 0,03  | 0,966775766 | 0,34  | 0,703291096 | -0,4  | 0,514700536 | -0,05 | 0,932803079 | 0,54  | 0,622910734 |
| 1700041C23Rik  | -0,03 | 0,964154899 | -0,04 | 0,955475499 | -0,11 | 0,929871006 | 0,06  | 0,899335603 | 0,09  | 0,912119712 |
| 1700041G16Rik  | -0,15 | 0,860773832 | -0,4  | 0,818644275 | -0,34 | 0,777918093 | 0,3   | 0,800322194 | 0,83  | 0,639071244 |
| 1700041M05Rik  | 0,22  | 0,679257396 | 0,11  | 0,842663656 | -0,37 | 0,431861347 | 0,08  | 0,870113725 | -0,23 | 0,751267508 |
| 1700041M19Rik  | 0,41  | 0,376797035 | 0,32  | 0,436747749 | -0,12 | 0,891365932 | 0     | 1           | -0,08 | 0,933827144 |
| 1700042G07Rik  | -0,01 | 0,984972115 | -0,1  | 0,828818891 | 0,08  | 0,891365932 | 0,12  | 0,781552067 | -0,06 | 0,952299975 |
| 1700042G15Rik  | 0,39  | 0,524085673 | -0,15 | 0,781046971 | 0,32  | 0,737241227 | -0,53 | 0,204120985 | -0,42 | 0,537393108 |
| 1700042O10Rik  | 0,23  | 0,66331039  | 0,11  | 0,915213759 | -0,06 | 0,940099524 | 0,2   | 0,65327421  | -0,22 | 0,779920985 |
| 1700044C05Rik  | 0,07  | 0,907554012 | -0,24 | 0,832841509 | 0,06  | 0,941627748 | 0,08  | 0,846857252 | 0,07  | 0,928724353 |
| 1700044K03Rik  | 0,24  | 0,642618049 | 0,09  | 0,868010263 | -0,19 | 0,76370647  | -0,23 | 0,564917798 | 0     | 0,997876986 |
| 1700045H11Rik  | 0,26  | 0,741182094 | 0,11  | 0,905051067 | -0,29 | 0,657545855 | -0,02 | 0,977864608 | 0,16  | 0,875421436 |
| 1700045I11Rik  | 0,04  | 0,947732835 | 0,17  | 0,720902851 | -0,27 | 0,675674731 | -0,29 | 0,496236806 | -0,2  | 0,763240477 |
| 1700046C09Rik  | -0,15 | 0,785012364 | 0,44  | 0,557547869 | 0,06  | 0,929395646 | -0,02 | 0,980883383 | 0,12  | 0,883885544 |
| 1700047A11Rik  | 0     | 0,998927419 | 0,11  | 0,912137323 | -0,32 | 0,574447952 | -0,39 | 0,580120569 | -0,14 | 0,864006331 |
| 1700047F07Rik  | 0,07  | 0,963914207 | 0,21  | 0,836404534 | -0,02 | 0,985326269 | -0,12 | 0,830378065 | 0,01  | 0,994774512 |
| 1700047G03Rik  | -0,12 | 0,827116244 | -0,33 | 0,544554841 | -0,27 | 0,681398968 | 0,31  | 0,339289548 | -0,32 | 0,605541773 |
| 1700047G07Rik  | 0,43  | 0,592989013 | 0,15  | 0,730338344 | -0,36 | 0,715497532 | 0,41  | 0,392579767 | -0,33 | 0,560964387 |
| 1700047K16Rik  | 0,17  | 0,680520303 | 0,08  | 0,911968718 | -0,14 | 0,8128837   | 0,23  | 0,603302092 | 0,31  | 0,566533257 |
| 1700047L14Rik  | 0,23  | 0,595204995 | 0,17  | 0,725935658 | 0,08  | 0,894018349 | -0,13 | 0,747126843 | 0,11  | 0,861763071 |
| 1700047M11Rik  | 0,06  | 0,923749064 | 0,1   | 0,829923566 | 0,11  | 0,889879507 | -0,02 | 0,971338071 | -0,09 | 0,942469511 |
| 1700048M11Rik  | 0,12  | 0,792732549 | -0,09 | 0,839789639 | 0,04  | 0,958214619 | -0,01 | 0,983166423 | -0,01 | 0,992980215 |
| 1700048O20Rik  | 0,26  | 0,734863705 | -0,25 | 0,832841509 | -0,35 | 0,497737228 | -0,17 | 0,669457175 | 0,21  | 0,823098095 |
| 1700049E15Rik  | -0,04 | 0,958535933 | -0,02 | 0,977422441 | -0,1  | 0,901657462 | -0,07 | 0,882243971 | -0,26 | 0,682139425 |
| 1700049E17Rik1 | -0,83 | 0,355779967 | 0,27  | 0,615756725 | 0,07  | 0,948637233 | -0,2  | 0,871321071 | -0,19 | 0,892349039 |
| 1700049E22Rik  | 0,03  | 0,966775766 | -0,1  | 0,927804354 | 0,24  | 0,658721799 | 0,05  | 0,960885529 | 0,02  | 0,983617617 |
| 1700049G17Rik  | 0,41  | 0,59710379  | -0,26 | 0,88632917  | 0,25  | 0,775367269 | -0,39 | 0,518117909 | 0,38  | 0,730951829 |
| 1700049J03Rik  | 0,03  | 0,958355747 | 0     | 1           | -0,15 | 0,787299582 | -0,21 | 0,764819621 | -0,32 | 0,616321633 |
| 1700049L16Rik  | 0,04  | 0,956452501 | -0,28 | 0,761404909 | -0,11 | 0,9113279   | 0,27  | 0,71050512  | 0,29  | 0,740020498 |
| 1700051A21Rik  | -0,35 | 0,460231397 | -0,62 | 0,514683597 | -0,19 | 0,817106175 | 0,05  | 0,946205705 | -0,13 | 0,853041033 |
| 1700052I22Rik  | 0,09  | 0,848847477 | 0,05  | 0,940046211 | -0,03 | 0,964654526 | 0,09  | 0,819184097 | -0,07 | 0,922921816 |
| 1700052K11Rik  | -0,05 | 0,962399085 | 0,33  | 0,537678815 | -0,02 | 0,987356432 | -0,54 | 0,165268429 | -0,06 | 0,947257087 |
| 1700054A03Rik  | 0,05  | 0,932654105 | 0,01  | 0,996105203 | 0,01  | 0,993379272 | -0,33 | 0,62736758  | -0,05 | 0,956610289 |
| 1700054K19Rik  | -0,08 | 0,90742841  | -0,5  | 0,490650707 | 0,02  | 0,981207238 | 0,18  | 0,688341079 | 0,2   | 0,762256548 |

|               |       |             |       |             |       |             |       |             |       |             |
|---------------|-------|-------------|-------|-------------|-------|-------------|-------|-------------|-------|-------------|
| 1700054M17Rik | 0,16  | 0,764824121 | 0,19  | 0,657429109 | -0,14 | 0,829285065 | -0,12 | 0,730493593 | 0,08  | 0,915395762 |
| 1700054O19Rik | 0,03  | 0,972989101 | 0,17  | 0,86828753  | -0,33 | 0,715407764 | -1,13 | 0,373655368 | -0,25 | 0,907903208 |
| 1700055C04Rik | 0,15  | 0,773356367 | -0,09 | 0,86724871  | -0,14 | 0,825914825 | 0,22  | 0,474687875 | -0,06 | 0,947437555 |
| 1700055D18Rik | -0,23 | 0,779331628 | 0,27  | 0,879312033 | -1,1  | 0,343594254 | -0,2  | 0,803104662 | 0,19  | 0,906189244 |
| 1700056E22Rik | -0,19 | 0,81630789  | 0,36  | 0,739345787 | -0,28 | 0,56948206  | 0,51  | 0,453228367 | 0,13  | 0,891925115 |
| 1700056N10Rik | -0,01 | 0,996998625 | 0,14  | 0,842793123 | 1,45  | 0,02204647  | 0,29  | 0,628027498 | 0,25  | 0,825697364 |
| 1700057G04Rik | -0,01 | 0,996219097 | -0,26 | 0,814293929 | -0,69 | 0,172062354 | 0,29  | 0,699348716 | -0,18 | 0,899686886 |
| 1700057H15Rik | -0,74 | 0,312439966 | 0,2   | 0,840044986 | -0,36 | 0,609295984 | -0,64 | 0,297209799 | -0,25 | 0,734515607 |
| 1700057H21Rik | 0,06  | 0,94727537  | 0,47  | 0,590722193 | 0,12  | 0,901410016 | -0,58 | 0,493485636 | 0,11  | 0,910829332 |
| 1700058P15Rik | -0,15 | 0,754095492 | 0,05  | 0,932292974 | -0,23 | 0,70398922  | 0,25  | 0,539796706 | 0,29  | 0,628127128 |
| 1700060C16Rik | -0,06 | 0,939308558 | 0,24  | 0,72665096  | -0,04 | 0,969570532 | -0,1  | 0,839678553 | -0,1  | 0,924766813 |
| 1700060C20Rik | 0,59  | 0,432237541 | -0,07 | 0,956504634 | 0,2   | 0,821593262 | 0,31  | 0,4307836   | 0,17  | 0,776907684 |
| 1700060J05Rik | 0     | 0,998449912 | 0,03  | 0,96172404  | -0,04 | 0,959990799 | -0,07 | 0,874607411 | 0,14  | 0,859185944 |
| 1700060O08Rik | 0,28  | 0,503332622 | 0,15  | 0,738762579 | -0,21 | 0,685772252 | -0,21 | 0,548228115 | 0,07  | 0,933307994 |
| 1700061E17Rik | -0,27 | 0,59648949  | 0,31  | 0,800591362 | 0,08  | 0,924910686 | -0,13 | 0,848743408 | 0,29  | 0,71621363  |
| 1700061E18Rik | 0,18  | 0,666546952 | -0,08 | 0,856132795 | 0,11  | 0,874098993 | 0,09  | 0,834417359 | 0,21  | 0,715879151 |
| 1700061F12Rik | 0     | 0,996998625 | 0,13  | 0,851610126 | 0,15  | 0,811424918 | 0,14  | 0,740510034 | 0,17  | 0,830077903 |
| 1700061G19Rik | -0,02 | 0,972112267 | 0,17  | 0,811280211 | 0,04  | 0,962766843 | 0,12  | 0,837974367 | 0,03  | 0,97683359  |
| 1700061H18Rik | 0,01  | 0,995438679 | -0,17 | 0,732044571 | -0,09 | 0,906678445 | -0,29 | 0,58838089  | -0,09 | 0,91339829  |
| 1700061I17Rik | -0,29 | 0,639478916 | -0,16 | 0,807175471 | 0,04  | 0,953282634 | 0,28  | 0,487256882 | 0,47  | 0,439284732 |
| 1700061J23Rik | 0,09  | 0,842297453 | -0,15 | 0,82532734  | 0,03  | 0,964509282 | 0,15  | 0,799699845 | -0,19 | 0,780146072 |
| 1700063A18Rik | 0,67  | 0,328119497 | 0,19  | 0,790958831 | 0,15  | 0,887053637 | 0,02  | 0,95852873  | 0,19  | 0,778593926 |
| 1700063D05Rik | 0,03  | 0,98297164  | -0,23 | 0,677026666 | -0,29 | 0,671222427 | 0,21  | 0,858956727 | -0,07 | 0,955247021 |
| 1700063H04Rik | 0,2   | 0,757032046 | 0,24  | 0,664818804 | 0,01  | 0,993379272 | -0,18 | 0,833013516 | 0,27  | 0,696732699 |
| 1700063O14Rik | 0,11  | 0,856118781 | 0,23  | 0,664787536 | -0,27 | 0,514610288 | 0,07  | 0,870647811 | -0,08 | 0,92741476  |
| 1700064E03Rik | 0,05  | 0,918014667 | 0,16  | 0,761929694 | -0,19 | 0,757498725 | -0,15 | 0,732310808 | 0,02  | 0,983613958 |
| 1700064H15Rik | 0,11  | 0,84900712  | 0,03  | 0,956998711 | 0,06  | 0,955742302 | 0,05  | 0,912078518 | 0     | 0,996625245 |
| 1700064J06Rik | -0,09 | 0,892062603 | -0,08 | 0,893090183 | 0,21  | 0,746677927 | 0,22  | 0,596819415 | -0,13 | 0,865258929 |
| 1700064M15Rik | 0,07  | 0,892974912 | 0,02  | 0,969216924 | 0     | 0,999931921 | -0,1  | 0,839567244 | -0,09 | 0,914498972 |
| 1700065D16Rik | 0,57  | 0,374743123 | 0,04  | 0,928134372 | 0,39  | 0,570755021 | 0     | 0,99441878  | 0,01  | 0,994766532 |
| 1700065I16Rik | 0,17  | 0,779331628 | 0,09  | 0,911148146 | 0,11  | 0,937222375 | -0,5  | 0,27642685  | -0,63 | 0,15734187  |
| 1700065J11Rik | 0,22  | 0,573661766 | 0,05  | 0,908677592 | -0,15 | 0,808747196 | -0,17 | 0,696837631 | 0,06  | 0,939448119 |
| 1700065J18Rik | 0,15  | 0,858977038 | 0     | 1           | 0,19  | 0,754138555 | 0,26  | 0,379392822 | -0,04 | 0,962631948 |
| 1700065O20Rik | 0,37  | 0,260869907 | 0,24  | 0,827098118 | 0,06  | 0,946528842 | -0,11 | 0,841644929 | 0,05  | 0,960774794 |
| 1700066B17Rik | 0,4   | 0,401159049 | -0,04 | 0,980518468 | -0,09 | 0,889371168 | 0,33  | 0,456643406 | 0     | 0,99981982  |

|               |       |             |       |             |       |             |       |             |       |             |
|---------------|-------|-------------|-------|-------------|-------|-------------|-------|-------------|-------|-------------|
| 1700066B19Rik | -0,16 | 0,7494877   | 0,23  | 0,663288343 | -0,28 | 0,705811313 | -0,09 | 0,888393876 | 0,08  | 0,952718905 |
| 1700066C05Rik | 0,24  | 0,518267881 | 0,06  | 0,937424389 | 0,39  | 0,668690906 | -0,09 | 0,932834598 | -0,37 | 0,692895938 |
| 1700066J03Rik | 0,24  | 0,594945461 | 0,21  | 0,653306667 | -0,37 | 0,570755021 | 0,01  | 0,991962381 | 0,15  | 0,902899311 |
| 1700066M21Rik | -0,16 | 0,804417792 | -0,06 | 0,932292974 | 0,59  | 0,599202081 | 0,1   | 0,8214961   | -0,32 | 0,4940585   |
| 1700066N21Rik | -0,41 | 0,357054834 | 0,04  | 0,969314504 | 0,27  | 0,672490033 | 0,7   | 0,106958367 | 0,1   | 0,947437555 |
| 1700066O22Rik | 0,55  | 0,319558444 | 0,04  | 0,959837002 | -0,4  | 0,617232872 | 0,16  | 0,830691057 | 0,11  | 0,939948423 |
| 1700067G17Rik | 0,4   | 0,594113632 | -0,24 | 0,818072947 | -0,2  | 0,73501607  | 0,05  | 0,942739047 | -0,22 | 0,765340194 |
| 1700067K01Rik | 0,11  | 0,906830225 | 0,51  | 0,555906531 | -0,28 | 0,707447086 | -0,49 | 0,609350605 | -0,3  | 0,788112596 |
| 1700067P10Rik | 0,12  | 0,91803437  | 0,16  | 0,934602811 | 0,23  | 0,620837479 | -0,17 | 0,87148686  | 0,4   | 0,547589359 |
| 1700069B07Rik | 0,27  | 0,575887113 | -0,1  | 0,832841509 | -0,2  | 0,736837174 | 0,01  | 0,992906132 | -0,02 | 0,978981442 |
| 1700069L16Rik | -0,19 | 0,840515514 | 0,51  | 0,673542391 | -0,13 | 0,94178334  | -0,56 | 0,59638298  | -0,06 | 0,977599806 |
| 1700069P05Rik | -0,24 | 0,61897512  | -0,17 | 0,869495185 | -0,03 | 0,963725374 | 0,02  | 0,985865561 | 0,13  | 0,869710279 |
| 1700071G01Rik | -0,16 | 0,699044216 | 0,24  | 0,617747556 | -0,18 | 0,740195645 | 0,05  | 0,917220021 | -0,21 | 0,729457433 |
| 1700071K01Rik | -0,13 | 0,850491134 | -0,42 | 0,664710351 | -0,46 | 0,514610288 | 0,17  | 0,76520917  | 0,17  | 0,853098245 |
| 1700071M16Rik | -0,01 | 0,992748202 | 0,09  | 0,936414321 | -0,01 | 0,990836784 | -0,04 | 0,973848105 | -0,08 | 0,946463658 |
| 1700072B07Rik | -0,28 | 0,645014997 | -0,22 | 0,794036677 | 0,05  | 0,956894731 | -0,32 | 0,697953188 | -0,27 | 0,712793529 |
| 1700072O05Rik | 0,04  | 0,953702758 | 0,07  | 0,89081665  | -0,35 | 0,457592846 | -0,03 | 0,956803614 | 0,05  | 0,958856121 |
| 1700073E17Rik | 0,02  | 0,972752401 | -0,05 | 0,919602924 | -0,1  | 0,879316358 | 0,04  | 0,935076398 | -0,04 | 0,966951657 |
| 1700074H08Rik | 0,52  | 0,28269058  | 0,11  | 0,831404974 | -0,45 | 0,465936592 | -0,05 | 0,900918368 | -0,18 | 0,763240477 |
| 1700074P13Rik | -0,25 | 0,673367834 | -0,05 | 0,956049982 | -0,32 | 0,723154215 | -0,17 | 0,74230922  | 0,2   | 0,887719506 |
| 1700080E11Rik | 0,48  | 0,586458491 | 0,13  | 0,910284662 | -0,14 | 0,928376443 | -0,25 | 0,584151489 | -0,39 | 0,689780577 |
| 1700080G11Rik | 0,15  | 0,795567544 | 0,41  | 0,641952023 | -0,08 | 0,921817943 | 0,07  | 0,9130534   | -0,14 | 0,868494821 |
| 1700080N15Rik | 0,38  | 0,562609036 | 0,43  | 0,748874675 | -0,02 | 0,983471086 | 0,38  | 0,676010477 | -0,12 | 0,884248437 |
| 1700080O16Rik | 0,08  | 0,897717279 | 0,33  | 0,531718087 | -0,47 | 0,483761569 | 0,37  | 0,349146791 | 0,53  | 0,386796948 |
| 1700081H04Rik | -0,02 | 0,986502345 | 0,08  | 0,899496232 | -0,06 | 0,929871006 | 0,26  | 0,637350063 | 0,09  | 0,91398047  |
| 1700082M22Rik | 0,23  | 0,78706718  | -0,73 | 0,223537    | -0,25 | 0,813110365 | 0,63  | 0,270815366 | 0,25  | 0,692665626 |
| 1700083H02Rik | 0,07  | 0,889411759 | 0,08  | 0,856719574 | 0     | 0,999796402 | 0,02  | 0,972656417 | 0,08  | 0,91339829  |
| 1700084C06Rik | 0,02  | 0,971479319 | 0,23  | 0,826349245 | 0,22  | 0,764615262 | -0,05 | 0,931392535 | -0,24 | 0,78981976  |
| 1700084E18Rik | -0,46 | 0,398161473 | -0,32 | 0,478338    | 0,25  | 0,861307315 | -0,3  | 0,736730464 | -0,79 | 0,341238778 |
| 1700084F23Rik | 0,08  | 0,927866076 | -0,28 | 0,758387553 | -0,27 | 0,788878413 | 0,14  | 0,799699845 | 0,03  | 0,97683359  |
| 1700084J12Rik | 0,38  | 0,70561613  | 0,24  | 0,922828409 | -0,45 | 0,543696688 | -0,36 | 0,667408547 | 0,06  | 0,961780852 |
| 1700084M14Rik | 0,17  | 0,749658322 | -0,03 | 0,959685428 | 0,04  | 0,957267292 | -0,15 | 0,673534755 | -0,12 | 0,884640084 |
| 1700085C21Rik | 0,12  | 0,799477555 | 0,08  | 0,928134372 | -0,34 | 0,663585217 | -0,01 | 0,985936439 | -0,2  | 0,730951829 |
| 1700086D15Rik | 0,27  | 0,753493732 | 0,32  | 0,738762579 | 0     | 0,999329448 | -0,47 | 0,664457643 | 0,52  | 0,604239727 |
| 1700086L19Rik | 0,02  | 0,973458531 | -0,02 | 0,984006421 | 0,2   | 0,700061351 | 0,52  | 0,338457192 | 0,47  | 0,442579293 |

|               |       |             |       |             |       |             |       |             |       |             |
|---------------|-------|-------------|-------|-------------|-------|-------------|-------|-------------|-------|-------------|
| 1700086O06Rik | -0,06 | 0,959985598 | -0,07 | 0,957957101 | -0,77 | 0,494467165 | -0,02 | 0,984136649 | -0,23 | 0,728388857 |
| 1700086P04Rik | 0,58  | 0,29523865  | 0,46  | 0,352228531 | -0,19 | 0,785542164 | -0,54 | 0,287693828 | 0,02  | 0,984125319 |
| 1700087M22Rik | 0,01  | 0,993728727 | 0,07  | 0,912535732 | 0,2   | 0,709222239 | -0,14 | 0,691869626 | -0,13 | 0,85776935  |
| 1700088E04Rik | -0,44 | 0,486906643 | -0,23 | 0,857531371 | -0,09 | 0,931220124 | -0,03 | 0,973986088 | 0,11  | 0,91353356  |
| 1700091H14Rik | 0,36  | 0,600589233 | -0,42 | 0,356588917 | -0,15 | 0,877115707 | 0,24  | 0,553928159 | -0,12 | 0,90197982  |
| 1700092C02Rik | 0,19  | 0,815219917 | 0,3   | 0,796106258 | 0,14  | 0,837003818 | -0,02 | 0,983462169 | 0,14  | 0,86809582  |
| 1700092C10Rik | -0,09 | 0,883988952 | 0,31  | 0,689265519 | -0,2  | 0,791940256 | -0,3  | 0,575912901 | 0,39  | 0,591728671 |
| 1700092E19Rik | 0,24  | 0,663556512 | 0,72  | 0,5008494   | -0,67 | 0,171676052 | -0,28 | 0,603611964 | -0,2  | 0,829280608 |
| 1700092K14Rik | -0,03 | 0,968500829 | -0,18 | 0,804868131 | -0,09 | 0,927950027 | 0,17  | 0,690302851 | 0,11  | 0,884244347 |
| 1700092M07Rik | 0,08  | 0,938024826 | 0,2   | 0,718366863 | -0,24 | 0,676708199 | 0,14  | 0,696542281 | 0,21  | 0,736118877 |
| 1700093J21Rik | 0,18  | 0,815931826 | 0,78  | 0,453958512 | 0,3   | 0,816360932 | 0,57  | 0,404359472 | 0,35  | 0,602231893 |
| 1700093K21Rik | 0,19  | 0,700358581 | -0,15 | 0,916496897 | 0,18  | 0,807786405 | 0,04  | 0,941644811 | -0,03 | 0,974553568 |
| 1700094D03Rik | 0,73  | 0,214139353 | 0,22  | 0,807402015 | 0,33  | 0,574656919 | -0,86 | 0,097755932 | 0,56  | 0,446990293 |
| 1700094J05Rik | 0,05  | 0,966775766 | -0,06 | 0,932292974 | -0,03 | 0,981848891 | -0,05 | 0,937855929 | -0,05 | 0,961749007 |
| 1700094M24Rik | 0,14  | 0,777335496 | 0,07  | 0,894575535 | 0,02  | 0,985675844 | -0,12 | 0,765338637 | -0,05 | 0,949178165 |
| 1700095A13Rik | 0,16  | 0,727684698 | 0,05  | 0,934468159 | -0,13 | 0,854432422 | -0,02 | 0,972656417 | -0,13 | 0,846526184 |
| 1700095A21Rik | 0,07  | 0,892823025 | 0,54  | 0,353649732 | -0,09 | 0,919055276 | -0,2  | 0,567742338 | -0,13 | 0,83637573  |
| 1700095B10Rik | 0,46  | 0,605533951 | 0,09  | 0,903089182 | 0,06  | 0,944266382 | 0,33  | 0,50808678  | 0,46  | 0,457844384 |
| 1700095J03Rik | 0,09  | 0,864526424 | 0,03  | 0,98230594  | -0,15 | 0,894018349 | -0,05 | 0,926612444 | -0,04 | 0,962585122 |
| 1700095J07Rik | 0,02  | 0,984040323 | 0,17  | 0,715688609 | -0,35 | 0,598378377 | -0,21 | 0,588433913 | 0,36  | 0,549951038 |
| 1700095J12Rik | -0,18 | 0,67647563  | 0,08  | 0,85726965  | -0,13 | 0,825782434 | 0,01  | 0,978728328 | 0,29  | 0,577335813 |
| 1700096J18Rik | 0,02  | 0,975949545 | 0,06  | 0,907186434 | -0,31 | 0,465949919 | -0,01 | 0,979829655 | -0,04 | 0,959155532 |
| 1700096K18Rik | -0,77 | 0,19218105  | 0,28  | 0,680709276 | -0,53 | 0,644476432 | -0,52 | 0,550483161 | 0,39  | 0,796235338 |
| 1700097N02Rik | 0,26  | 0,697053625 | -0,08 | 0,935984823 | -0,08 | 0,926667299 | 0,15  | 0,735574482 | -0,1  | 0,893786534 |
| 1700099I09Rik | -0,05 | 0,967892992 | 0,25  | 0,701492683 | -0,02 | 0,987356432 | 0,1   | 0,936482652 | -0,29 | 0,752873495 |
| 1700100L14Rik | 0,38  | 0,540951867 | 0,05  | 0,954107225 | 0,08  | 0,942112992 | -0,03 | 0,954312136 | 0,26  | 0,721825544 |
| 1700101G07Rik | 0,6   | 0,321600657 | 0,04  | 0,96497149  | 0,31  | 0,579159818 | -0,14 | 0,81044145  | 0,02  | 0,984675109 |
| 1700101I11Rik | 0,04  | 0,948926586 | 0,25  | 0,664787536 | -0,08 | 0,932932843 | -0,03 | 0,967866794 | 0,4   | 0,523184505 |
| 1700101I19Rik | 0,16  | 0,721797378 | 0     | 1           | -0,3  | 0,54913284  | 0,2   | 0,629256751 | 0,16  | 0,815693459 |
| 1700101O22Rik | -0,03 | 0,966775766 | -0,13 | 0,862024138 | -0,12 | 0,890039178 | -0,04 | 0,94180692  | -0,05 | 0,950021061 |
| 1700102H20Rik | -0,18 | 0,745514605 | -0,15 | 0,849913233 | 0,05  | 0,95204022  | 0,1   | 0,839333217 | 0,36  | 0,750359224 |
| 1700102P08Rik | 0,72  | 0,489042022 | 0,37  | 0,70753686  | -0,23 | 0,856046789 | -1,03 | 0,143071117 | 0,34  | 0,812818127 |
| 1700104B16Rik | 0,34  | 0,556438284 | 0,12  | 0,792112243 | 0,22  | 0,782269098 | -0,17 | 0,74458215  | 0,17  | 0,844265172 |
| 1700105P06Rik | -0,09 | 0,839881823 | -0,01 | 0,982332924 | -0,65 | 0,453052815 | -0,69 | 0,665234661 | -0,39 | 0,831815586 |
| 1700108F19Rik | -0,19 | 0,899646477 | -0,01 | 0,999546856 | 0,1   | 0,954550124 | 0,55  | 0,657996279 | 0,47  | 0,682929195 |



|               |       |             |       |             |       |             |       |             |       |             |
|---------------|-------|-------------|-------|-------------|-------|-------------|-------|-------------|-------|-------------|
| 1700108J01Rik | 0,04  | 0,945504973 | 0     | 1           | -0,19 | 0,709630666 | 0,08  | 0,864633859 | 0     | 0,997070668 |
| 1700108N11Rik | 0,11  | 0,78682706  | -0,26 | 0,672871026 | -0,32 | 0,59595639  | -0,02 | 0,974910687 | -0,15 | 0,833124162 |
| 1700109G14Rik | 0,04  | 0,945762129 | 0,49  | 0,274811602 | -0,34 | 0,745291191 | -0,07 | 0,875307679 | 0,38  | 0,469148703 |
| 1700109G15Rik | 0,61  | 0,46904598  | -0,34 | 0,772036397 | -0,26 | 0,855096189 | -0,12 | 0,849702189 | -0,05 | 0,975200543 |
| 1700109H08Rik | 0,58  | 0,225666136 | 0,09  | 0,946885634 | 0,28  | 0,777918093 | 0,64  | 0,406892645 | 0,39  | 0,694233384 |
| 1700109I08Rik | 0,02  | 0,973698017 | 0,17  | 0,805949528 | 0,2   | 0,688643408 | 0,08  | 0,89346159  | 0,34  | 0,507234235 |
| 1700109K24Rik | 0,36  | 0,696873129 | 0,54  | 0,824691053 | -0,13 | 0,867580642 | 0,39  | 0,252992148 | -0,03 | 0,979456872 |
| 1700110C19Rik | 0,31  | 0,801386084 | 0,59  | 0,626813483 | 0,17  | 0,917637235 | -1,15 | 0,235558038 | -0,09 | 0,954565959 |
| 1700110I01Rik | 0,14  | 0,898116888 | 0,21  | 0,688925545 | 0,11  | 0,899913569 | -0,2  | 0,799835488 | -0,02 | 0,980945466 |
| 1700110K17Rik | 0,25  | 0,611894855 | -0,29 | 0,723842223 | -0,02 | 0,986406216 | -0,02 | 0,971151107 | 0,21  | 0,735152891 |
| 1700111E14Rik | -0,12 | 0,778869381 | 0,2   | 0,793842674 | -0,09 | 0,901047389 | 0,02  | 0,974813898 | 0,13  | 0,91159625  |
| 1700111N16Rik | -0,16 | 0,827552513 | 0,1   | 0,932586913 | -0,48 | 0,4814931   | 0     | 0,993869623 | 0     | 0,998444219 |
| 1700112D23Rik | 0,1   | 0,923033769 | -0,2  | 0,88928164  | -0,25 | 0,703468807 | 0,28  | 0,668940488 | 0,25  | 0,651690564 |
| 1700112E06Rik | 0,21  | 0,749209475 | 0,11  | 0,884434898 | 0,12  | 0,887998113 | -0,11 | 0,890879327 | 0,03  | 0,983469081 |
| 1700112H15Rik | -0,02 | 0,988414371 | -1,43 | 0,04808815  | -0,02 | 0,993686224 | 1,51  | 0,013168458 | 0,22  | 0,697336851 |
| 1700112J05Rik | 0     | 0,996998625 | -0,12 | 0,855632384 | -0,1  | 0,894229514 | -0,01 | 0,993869623 | 0,16  | 0,844105751 |
| 1700112J16Rik | -0,38 | 0,614774993 | -0,44 | 0,674468926 | 0,17  | 0,783928849 | 0,19  | 0,80718406  | 0,05  | 0,977945762 |
| 1700112K13Rik | -0,11 | 0,839881823 | -0,04 | 0,941811651 | 0,07  | 0,912299263 | 0,03  | 0,93756856  | 0,1   | 0,885872093 |
| 1700113A16Rik | -0,25 | 0,770891276 | -0,36 | 0,842824184 | -0,5  | 0,445150751 | -0,54 | 0,695517571 | 0,16  | 0,953764773 |
| 1700113H08Rik | 0,02  | 0,991027737 | 0,1   | 0,831404974 | -0,37 | 0,415635321 | -0,15 | 0,859466831 | -0,07 | 0,961281513 |
| 1700116B05Rik | 0,05  | 0,932061055 | -0,16 | 0,877770697 | -0,05 | 0,95204022  | 0,13  | 0,732505868 | 0,05  | 0,952435416 |
| 1700119H24Rik | -0,11 | 0,811748448 | -0,22 | 0,712500402 | -0,28 | 0,654328013 | -0,04 | 0,943361276 | 0,07  | 0,936246118 |
| 1700119I11Rik | 0,06  | 0,946792769 | -0,07 | 0,99305294  | 0,39  | 0,433481425 | 0,78  | 0,604464705 | -0,41 | 0,66608849  |
| 1700120B22Rik | 0,33  | 0,387558354 | 0,57  | 0,398684036 | 0,28  | 0,64473731  | -0,14 | 0,703087471 | 0,39  | 0,510444912 |
| 1700120C14Rik | 0,21  | 0,669220209 | 0,12  | 0,803158498 | -0,16 | 0,764964006 | 0,23  | 0,692483691 | -0,31 | 0,643580968 |
| 1700120E14Rik | 0,48  | 0,316149395 | 0,72  | 0,186259968 | -0,02 | 0,983759267 | -0,9  | 0,064951915 | -0,41 | 0,550083777 |
| 1700120G07Rik | 0,04  | 0,956518553 | -0,05 | 0,956502806 | 0,02  | 0,985326269 | 0,04  | 0,967866794 | -0,13 | 0,876418697 |
| 1700120G11Rik | 0,03  | 0,956194544 | -0,04 | 0,948496432 | 0,2   | 0,736669204 | 0,18  | 0,609350605 | 0,25  | 0,6668249   |
| 1700120K04Rik | 0,04  | 0,955276549 | -0,17 | 0,732044571 | 0     | 0,997689307 | -0,51 | 0,402823171 | -0,77 | 0,276728769 |
| 1700121L16Rik | -0,46 | 0,397504196 | -0,24 | 0,74081606  | -0,19 | 0,864411302 | 0,51  | 0,392579767 | 0,26  | 0,694233384 |
| 1700121N20Rik | -0,07 | 0,902306009 | -0,11 | 0,819120994 | 0,08  | 0,934813979 | 0,08  | 0,849242587 | -0,07 | 0,931519966 |
| 1700122E12Rik | -0,11 | 0,841140165 | -0,28 | 0,614530823 | -0,32 | 0,660920525 | 0,35  | 0,401899137 | -0,02 | 0,985269236 |
| 1700122O11Rik | -0,23 | 0,728643996 | 0,09  | 0,890945229 | -0,06 | 0,961337501 | -0,34 | 0,514446    | -0,14 | 0,885777129 |
| 1700123I01Rik | 1,49  | 0,03843489  | 1,5   | 0,046017935 | -1,74 | 0,004621866 | -0,32 | 0,690664654 | 3,06  | 0,003719857 |
| 1700123K08Rik | -0,26 | 0,691658566 | -0,5  | 0,670629152 | -0,51 | 0,430507107 | 0,36  | 0,522230981 | 0,11  | 0,924618962 |

|               |       |             |       |             |       |             |       |             |       |             |
|---------------|-------|-------------|-------|-------------|-------|-------------|-------|-------------|-------|-------------|
| 1700123L14Rik | 0,2   | 0,814444163 | 0,07  | 0,943915456 | -0,3  | 0,744387748 | -0,11 | 0,935478757 | -0,15 | 0,925858284 |
| 1700123M08Rik | 0,19  | 0,748637664 | 0,11  | 0,926210163 | 0,04  | 0,972285775 | -0,69 | 0,322519882 | -0,09 | 0,953056817 |
| 1700123O12Rik | 0,6   | 0,178589155 | 0,17  | 0,804298342 | -0,33 | 0,780072407 | -0,43 | 0,561277618 | -0,78 | 0,541316402 |
| 1700123O20Rik | -0,03 | 0,970286316 | 0,17  | 0,702251293 | 0,56  | 0,452410597 | 0,19  | 0,726529864 | -0,21 | 0,784872568 |
| 1700123O21Rik | 0,22  | 0,761457464 | -0,05 | 0,970832543 | 0,3   | 0,584205245 | -0,21 | 0,665775786 | -0,28 | 0,642152163 |
| 1700124L16Rik | -0,48 | 0,306829062 | -0,12 | 0,901000778 | 0,03  | 0,974628464 | -0,52 | 0,599633602 | -0,55 | 0,579739537 |
| 1700125G02Rik | -0,03 | 0,981660925 | -0,23 | 0,750160982 | -0,39 | 0,423708884 | -0,13 | 0,857910103 | -0,12 | 0,902802615 |
| 1700125G22Rik | 0,13  | 0,80226019  | 0,15  | 0,830481143 | -0,13 | 0,861307315 | -0,25 | 0,648154714 | -0,17 | 0,838679773 |
| 1700125H03Rik | 0,21  | 0,80135729  | -0,19 | 0,783677427 | -0,04 | 0,975055092 | 0,13  | 0,869148815 | -0,1  | 0,894623317 |
| 1700125H20Rik | 0,09  | 0,933912196 | -0,28 | 0,666450149 | 0,02  | 0,987208663 | 0,26  | 0,72371857  | -0,01 | 0,994865893 |
| 1700126H18Rik | 0,25  | 0,743873094 | -0,18 | 0,804611595 | -0,31 | 0,599202081 | 0,06  | 0,891968912 | -0,11 | 0,884640084 |
| 1700128A07Rik | 0,07  | 0,919129818 | -0,01 | 0,996259587 | -0,21 | 0,700413691 | -0,12 | 0,792001973 | -0,24 | 0,765809384 |
| 1700128E19Rik | 0,14  | 0,779331628 | 0,09  | 0,845822338 | 0,09  | 0,882540073 | 0,01  | 0,976361058 | -0,18 | 0,781325829 |
| 1700128F08Rik | 0,52  | 0,578621914 | -0,06 | 0,974306445 | -0,09 | 0,940335002 | -0,12 | 0,922778648 | -0,27 | 0,857116684 |
| 1700129C05Rik | 0,18  | 0,76050225  | -0,07 | 0,936792848 | -0,15 | 0,828129261 | 0,24  | 0,571641129 | 0,24  | 0,76521225  |
| 1810006J02Rik | -0,49 | 0,6753408   | -0,07 | 0,93451524  | 0,22  | 0,867543859 | 0,79  | 0,596087826 | -0,95 | 0,465002838 |
| 1810007C17Rik | -0,11 | 0,852363306 | 0,25  | 0,499331692 | 0,11  | 0,84917539  | -0,07 | 0,858877782 | 0,09  | 0,91314596  |
| 1810007D17Rik | 0,09  | 0,882500171 | -0,02 | 0,983694775 | -0,23 | 0,808016398 | -0,14 | 0,784149512 | -0,17 | 0,835191    |
| 1810008B01Rik | 0,05  | 0,931028755 | 0,07  | 0,93163271  | -0,1  | 0,880706627 | -0,13 | 0,715825968 | -0,03 | 0,973428839 |
| 1810008I18Rik | -0,54 | 0,438932987 | 0,04  | 0,956145324 | 0,88  | 0,324768767 | 0,11  | 0,859957181 | 0,61  | 0,583631554 |
| 1810009A15Rik | -0,35 | 0,631688937 | -0,02 | 0,993789602 | -0,57 | 0,290123118 | 0,4   | 0,665033778 | 0,06  | 0,969927511 |
| 1810009J06Rik | 0,63  | 0,509512499 | -0,68 | 0,317755212 | 0,73  | 0,194619745 | -0,01 | 0,981610833 | -0,1  | 0,950267521 |
| 1810009N02Rik | -0,08 | 0,844104386 | 0,04  | 0,939289739 | 0,02  | 0,97548193  | -0,31 | 0,40933447  | -0,16 | 0,824818547 |
| 1810010D01Rik | 0,05  | 0,9577869   | -0,15 | 0,817661434 | -0,16 | 0,862441091 | -0,06 | 0,900530968 | 0,01  | 0,992607235 |
| 1810010H24Rik | -0,27 | 0,642618049 | -0,3  | 0,65931908  | 0,11  | 0,873457545 | -0,2  | 0,77073646  | -0,04 | 0,969617491 |
| 1810010K12Rik | -0,09 | 0,893283341 | 0,07  | 0,928565454 | 0,08  | 0,917981605 | 0,15  | 0,706623607 | 0,01  | 0,992694729 |
| 1810011H11Rik | 0,53  | 0,600349738 | 0,01  | 0,996259587 | 0,13  | 0,870377336 | 0,21  | 0,799669326 | 0,18  | 0,861002679 |
| 1810011O10Rik | -0,09 | 0,893361577 | 0,1   | 0,818301748 | -0,43 | 0,61190379  | -0,32 | 0,660110505 | -0,08 | 0,949544475 |
| 1810012K08Rik | 0,12  | 0,859435615 | -0,18 | 0,817110093 | -0,02 | 0,983337402 | 0,19  | 0,602857619 | 0,06  | 0,934615324 |
| 1810012K16Rik | -0,05 | 0,982432452 | -0,18 | 0,951395028 | 0,45  | 0,71593256  | -1,22 | 0,310394717 | -0,16 | 0,925858284 |
| 1810013A23Rik | -0,02 | 0,984124693 | 0,3   | 0,490650707 | -0,04 | 0,97548193  | -0,19 | 0,667849424 | -0,06 | 0,949014999 |
| 1810013D15Rik | 0,52  | 0,443299253 | 0,29  | 0,540719119 | -0,24 | 0,650169259 | -0,05 | 0,932268668 | 0,1   | 0,915067495 |
| 1810013L24Rik | 0,33  | 0,422668323 | 0,24  | 0,555906531 | 0,16  | 0,767502035 | -0,37 | 0,273505119 | 0,02  | 0,979392852 |
| 1810014B01Rik | -0,44 | 0,51964789  | -0,52 | 0,424068004 | -0,3  | 0,709317317 | -0,66 | 0,141647436 | -0,47 | 0,575543402 |
| 1810018F18Rik | 0,18  | 0,764189777 | -0,01 | 0,99605452  | -0,34 | 0,401236843 | 0,11  | 0,774181256 | 0,04  | 0,961432235 |

|               |       |             |       |             |       |             |       |             |       |             |
|---------------|-------|-------------|-------|-------------|-------|-------------|-------|-------------|-------|-------------|
| 1810019D21Rik | -0,13 | 0,829299665 | 0,03  | 0,975103597 | 0,15  | 0,825361067 | 0,66  | 0,380761582 | 0,29  | 0,697818445 |
| 1810019N24Rik | 0,1   | 0,820785667 | 0,18  | 0,734199028 | 0,16  | 0,783006    | -0,65 | 0,173600687 | -0,31 | 0,682139425 |
| 1810020O05Rik | 0,32  | 0,561790032 | 0,21  | 0,622191337 | 0,16  | 0,861307315 | 0,11  | 0,808985118 | 0,58  | 0,192994246 |
| 1810021B22Rik | 0,04  | 0,950343479 | -0,09 | 0,934294134 | 0,36  | 0,638965268 | -0,3  | 0,747440364 | -0,45 | 0,432621109 |
| 1810022K09Rik | -0,89 | 0,493024489 | 0,38  | 0,882847123 | 0,91  | 0,56948206  | 0,52  | 0,647287835 | -0,07 | 0,939948423 |
| 1810024B03Rik | -0,16 | 0,801665973 | -0,31 | 0,408512216 | 0,26  | 0,775163644 | -0,71 | 0,239185309 | -0,23 | 0,860591136 |
| 1810026B05Rik | -0,24 | 0,751534367 | 0,54  | 0,309506828 | -0,17 | 0,806044178 | -0,92 | 0,099292323 | -0,12 | 0,916297433 |
| 1810026J23Rik | -0,46 | 0,557053469 | 0     | 1           | -0,22 | 0,70635953  | 0,07  | 0,879866481 | -0,22 | 0,745574572 |
| 1810030O07Rik | -0,59 | 0,28727702  | -0,26 | 0,640836969 | 0,04  | 0,973732268 | 0,45  | 0,71158821  | 0,38  | 0,799495162 |
| 1810032O08Rik | -0,41 | 0,52707495  | -0,02 | 0,990759242 | 0,1   | 0,887358721 | 0,32  | 0,418568872 | 0,59  | 0,166595171 |
| 1810034E14Rik | -0,11 | 0,84900712  | -0,39 | 0,546432214 | 0,07  | 0,948687906 | -0,92 | 0,066195604 | -0,8  | 0,158178509 |
| 1810037I17Rik | 0,1   | 0,819634768 | -0,11 | 0,824407967 | 0,27  | 0,558908463 | -0,37 | 0,308923754 | 0     | 0,999775166 |
| 1810041L15Rik | 0,16  | 0,805837457 | 0,16  | 0,797170823 | -0,4  | 0,406287436 | -0,01 | 0,98283761  | 0     | 0,995918051 |
| 1810043G02Rik | 0,05  | 0,96177183  | -0,69 | 0,228792007 | 0,32  | 0,615059269 | 0,07  | 0,895892607 | -0,66 | 0,198575493 |
| 1810043H04Rik | -0,13 | 0,803761785 | -0,32 | 0,755498335 | -0,55 | 0,305677184 | 0,2   | 0,793134304 | 0,3   | 0,708051749 |
| 1810044D09Rik | 0,14  | 0,794063226 | 0,15  | 0,802979985 | 0,01  | 0,990554477 | -0,64 | 0,174313619 | -0,36 | 0,586214748 |
| 1810046K07Rik | -0,6  | 0,376305612 | -0,41 | 0,704681588 | -0,21 | 0,82622365  | -0,23 | 0,814570338 | 0,13  | 0,91339829  |
| 1810053B23Rik | 0,28  | 0,563164645 | 0,11  | 0,882847123 | -0,43 | 0,318952901 | 0,14  | 0,776545078 | 0,02  | 0,981913783 |
| 1810055G02Rik | -0,71 | 0,109547175 | -0,05 | 0,954343854 | 0,32  | 0,665094542 | 0,21  | 0,676010477 | -0,14 | 0,849391132 |
| 1810058I24Rik | 0,37  | 0,546826053 | 0,04  | 0,95021587  | 0,27  | 0,589859931 | 0,15  | 0,869497105 | -0,32 | 0,716979399 |
| 1810059C17Rik | 0,5   | 0,53686867  | 0,04  | 0,956934125 | 0,42  | 0,420501729 | -0,23 | 0,909634629 | -0,61 | 0,683840525 |
| 1810059H22Rik | -0,1  | 0,888840601 | -0,25 | 0,732044571 | -1,1  | 0,490661923 | 0     | 1           | -0,09 | 0,90992791  |
| 1810062G17Rik | -0,14 | 0,799145501 | 0,05  | 0,945241217 | 0,43  | 0,321969908 | 0,41  | 0,372816893 | 0,17  | 0,855354002 |
| 1810062O18Rik | 0,07  | 0,939858259 | 0,37  | 0,623157194 | -0,1  | 0,887072314 | -0,35 | 0,480288448 | 0,17  | 0,852954345 |
| 1810063I02Rik | -0,15 | 0,733583213 | -0,25 | 0,644516897 | 0,11  | 0,85092959  | 0,29  | 0,545372369 | -0,33 | 0,647876293 |
| 1810064F22Rik | 0,51  | 0,279256257 | 0,03  | 0,979002922 | -0,18 | 0,774393816 | 0,11  | 0,90213506  | 0,02  | 0,984125319 |
| 1810065E05Rik | 0,56  | 0,403771843 | 0,15  | 0,938825548 | 0,18  | 0,784475468 | 0,12  | 0,834083716 | 0,41  | 0,442579293 |
| 2010001A14Rik | -0,14 | 0,842326483 | -0,11 | 0,903595287 | -0,19 | 0,813783917 | -0,33 | 0,612756217 | -0,6  | 0,226701712 |
| 2010003K11Rik | 0,18  | 0,756091915 | 0,13  | 0,87189957  | 0,04  | 0,957402023 | 0,07  | 0,883783927 | -0,3  | 0,637685701 |
| 2010005H15Rik | -0,16 | 0,859481811 | 0,16  | 0,711237219 | -0,21 | 0,909717677 | -0,87 | 0,301663719 | 1,05  | 0,246887418 |
| 2010009K17Rik | -0,05 | 0,958624429 | -0,02 | 0,979002922 | -0,22 | 0,802192013 | 0,03  | 0,955119589 | 0,17  | 0,823098095 |
| 2010010A06Rik | 0,41  | 0,277692472 | 0,1   | 0,88185269  | -0,35 | 0,576939208 | -0,07 | 0,912516335 | -0,22 | 0,763240477 |
| 2010013B24Rik | 0,06  | 0,932324918 | 0,02  | 0,982047684 | -0,08 | 0,904884293 | 0,02  | 0,961864701 | 0,09  | 0,904931004 |
| 2010015M23Rik | 0,68  | 0,446811495 | -0,19 | 0,848631392 | -0,17 | 0,762549825 | 0,19  | 0,828361053 | 0,18  | 0,830268209 |
| 2010016I18Rik | 0,25  | 0,68349407  | -0,21 | 0,754578715 | -0,16 | 0,82162081  | 0,3   | 0,335755837 | 0,22  | 0,766069824 |

|               |       |             |       |             |       |             |       |             |       |             |
|---------------|-------|-------------|-------|-------------|-------|-------------|-------|-------------|-------|-------------|
| 2010106C02Rik | -0,06 | 0,925148331 | 0,01  | 0,990380046 | 0,24  | 0,749456891 | 0,15  | 0,688634619 | -0,24 | 0,793759742 |
| 2010106E10Rik | 0,02  | 0,976314749 | 0,24  | 0,763796207 | -0,23 | 0,767822182 | -0,2  | 0,842748629 | 0     | 0,997769477 |
| 2010107E04Rik | 0,06  | 0,944309453 | -0,38 | 0,75247655  | 0,31  | 0,789802954 | 1,08  | 0,06824225  | 0,48  | 0,486708315 |
| 2010107G12Rik | 0,5   | 0,307798337 | -0,53 | 0,654719935 | 0,22  | 0,740579016 | 0,44  | 0,314102154 | 0,55  | 0,321199383 |
| 2010107G23Rik | 0,9   | 0,321543483 | 0,54  | 0,631050084 | 0,08  | 0,899144679 | -0,72 | 0,126864633 | 0,1   | 0,889613878 |
| 2010109A12Rik | -0,1  | 0,928770547 | -0,37 | 0,670859269 | -0,13 | 0,887769873 | 0,1   | 0,932512513 | 0,52  | 0,496305418 |
| 2010109I03Rik | -0,18 | 0,718996404 | 0,27  | 0,765974961 | -0,19 | 0,8026742   | -0,54 | 0,349197576 | 0,11  | 0,905446784 |
| 2010110K18Rik | 0,02  | 0,982781318 | -0,3  | 0,752804236 | -0,21 | 0,753966565 | 0,17  | 0,715808932 | -0,19 | 0,752420653 |
| 2010111I01Rik | 0,24  | 0,748619201 | 0,33  | 0,597944986 | 0,01  | 0,993379272 | -0,82 | 0,12570607  | -0,24 | 0,753273319 |
| 2010204K13Rik | 0,08  | 0,930847983 | 0,03  | 0,985291538 | -0,18 | 0,836633803 | 0,21  | 0,686521503 | 0,3   | 0,737843954 |
| 2010300C02Rik | -0,16 | 0,822107047 | 0,16  | 0,905517116 | 0,23  | 0,72230278  | 1,03  | 0,055569548 | -0,04 | 0,97425848  |
| 2010300F17Rik | -0,18 | 0,814888638 | -0,22 | 0,787930579 | 0,63  | 0,574125052 | 0,34  | 0,351646843 | -0,1  | 0,936246118 |
| 2010308F09Rik | 0,06  | 0,926316023 | -0,23 | 0,800636573 | -0,52 | 0,38497941  | 0,59  | 0,177192888 | 0,57  | 0,317622551 |
| 2010309G21Rik | 0,29  | 0,597519827 | 0,08  | 0,925922661 | -0,33 | 0,552409541 | 0,05  | 0,931477012 | -0,15 | 0,864292286 |
| 2010310C07Rik | -0,04 | 0,972682121 | 0,56  | 0,664787536 | 0,27  | 0,842919139 | 0,32  | 0,782152758 | 0,12  | 0,947257087 |
| 2010315B03Rik | -0,23 | 0,892124736 | -0,08 | 0,979551751 | 0,17  | 0,892560908 | -0,19 | 0,813216198 | -0,29 | 0,765809384 |
| 2010320M18Rik | -0,38 | 0,371554727 | -0,12 | 0,841820909 | 0,31  | 0,6976409   | -0,09 | 0,867215413 | -0,4  | 0,527807778 |
| 2010320O07Rik | 0,03  | 0,975179875 | 0,09  | 0,856242883 | 0,07  | 0,924234896 | -0,04 | 0,937348194 | 0,08  | 0,913274952 |
| 2200002D01Rik | -0,12 | 0,87242447  | 0,15  | 0,863064855 | 0,12  | 0,890702663 | 1,38  | 0,140865327 | 0,22  | 0,8897371   |
| 2200002J24Rik | -0,01 | 0,98297164  | 0,3   | 0,440042155 | -0,18 | 0,791940256 | -0,22 | 0,547796639 | 0,06  | 0,947287491 |
| 2210008F06Rik | 0,28  | 0,598107971 | 0,01  | 0,987162042 | -0,01 | 0,990975207 | 0,16  | 0,710116369 | 0,03  | 0,97425848  |
| 2210010C04Rik | 0,21  | 0,714127381 | 0,15  | 0,891566803 | -0,38 | 0,701508321 | 0,32  | 0,630721816 | 0,16  | 0,905581898 |
| 2210011C24Rik | 0,16  | 0,809583841 | 0,11  | 0,895578147 | -0,17 | 0,861307315 | 0,32  | 0,561656192 | 0,03  | 0,980961333 |
| 2210013O21Rik | -0,04 | 0,942119638 | -0,05 | 0,928277437 | 0,21  | 0,773365699 | -0,08 | 0,849839285 | -0,24 | 0,650292523 |
| 2210016F16Rik | 0,15  | 0,774822327 | -0,05 | 0,965147491 | -0,25 | 0,683917899 | 0,29  | 0,438416463 | -0,04 | 0,973026298 |
| 2210016L21Rik | 0,21  | 0,596655034 | 0,18  | 0,818072947 | -0,11 | 0,877023506 | -0,28 | 0,371983631 | 0     | 0,998444219 |
| 2210019I11Rik | -0,07 | 0,897077512 | -0,12 | 0,853855782 | -0,17 | 0,896181325 | 0,22  | 0,658281831 | -0,04 | 0,965244101 |
| 2210039B01Rik | -0,03 | 0,973545171 | 0,32  | 0,580257061 | 0,07  | 0,909371204 | -0,03 | 0,97785074  | 0,05  | 0,969617491 |
| 2210404O09Rik | -0,22 | 0,753012482 | 0,48  | 0,39909134  | 0,3   | 0,791504463 | 0,32  | 0,76898268  | 0,43  | 0,699060093 |
| 2210406O10Rik | 0,25  | 0,864526424 | -0,23 | 0,864989815 | -0,09 | 0,911894304 | 0,18  | 0,777673386 | 0,23  | 0,819072786 |
| 2210407C18Rik | -0,41 | 0,420942329 | 0,15  | 0,894022563 | -0,15 | 0,859411859 | -0,1  | 0,775780803 | -0,04 | 0,969617491 |
| 2210408F21Rik | 0,15  | 0,888962766 | 0,21  | 0,695689103 | 0,04  | 0,979791644 | -0,66 | 0,215784507 | -0,35 | 0,631201077 |
| 2210408I21Rik | -0,21 | 0,834551395 | -0,48 | 0,626354464 | 0,62  | 0,475398917 | 0,23  | 0,845164782 | 0,09  | 0,970895331 |
| 2210409D07Rik | -0,17 | 0,846360756 | -0,05 | 0,962717715 | -0,4  | 0,542758274 | -0,03 | 0,97666971  | -0,16 | 0,907804083 |
| 2210409E12Rik | 0,09  | 0,842187558 | 0,05  | 0,929634547 | -0,14 | 0,891365932 | -0,54 | 0,393354297 | 0,55  | 0,655956123 |

|               |       |             |       |             |       |             |       |             |       |             |
|---------------|-------|-------------|-------|-------------|-------|-------------|-------|-------------|-------|-------------|
| 2210411M09Rik | 0,63  | 0,272619186 | 0,06  | 0,926210163 | -0,33 | 0,549836783 | 0,01  | 0,987192038 | 0,2   | 0,827150612 |
| 2210414B05Rik | -0,18 | 0,703606438 | -0,03 | 0,962888726 | -0,03 | 0,972847253 | -0,03 | 0,961003273 | 0,05  | 0,958068117 |
| 2210416O15Rik | 0,07  | 0,944309453 | -0,15 | 0,896003756 | -0,5  | 0,599127793 | -0,31 | 0,679235449 | -0,33 | 0,769081996 |
| 2210417A02Rik | 0,03  | 0,968770284 | 0,01  | 0,98954147  | -0,28 | 0,660920525 | -0,01 | 0,987810417 | -0,13 | 0,85885432  |
| 2210418O10Rik | -0,24 | 0,701624105 | -0,29 | 0,666450149 | -0,07 | 0,962321429 | 0,22  | 0,632009342 | -0,24 | 0,682032151 |
| 2210420H20Rik | -0,17 | 0,755984234 | 0,14  | 0,764672565 | -0,26 | 0,602775092 | 0     | 1           | 0,15  | 0,859050817 |
| 2300002M23Rik | -0,24 | 0,665821492 | -0,03 | 0,954295809 | 0,08  | 0,944266382 | 0,11  | 0,899335603 | -0,09 | 0,944318268 |
| 2300003K06Rik | 0,15  | 0,74140155  | 0,01  | 0,988550087 | -0,04 | 0,96736975  | 0,16  | 0,659409324 | -0,1  | 0,891138902 |
| 2300005B03Rik | 0,03  | 0,966775766 | 0,01  | 0,994376785 | -0,05 | 0,943934563 | 0,07  | 0,894977334 | 0,04  | 0,96176496  |
| 2300009A05Rik | -0,04 | 0,947630317 | -0,1  | 0,965147491 | 0,72  | 0,162456758 | 0,44  | 0,597834482 | 0,21  | 0,763240477 |
| 2310001H17Rik | -0,34 | 0,727930362 | 0,95  | 0,59555731  | -0,32 | 0,661747229 | -0,96 | 0,594189106 | 0,57  | 0,715879151 |
| 2310001K24Rik | 0,25  | 0,568104198 | 0,02  | 0,977103763 | -0,32 | 0,577789393 | 0,05  | 0,921731995 | -0,18 | 0,840952901 |
| 2310002D06Rik | 0,14  | 0,83702976  | -0,26 | 0,565456041 | -0,58 | 0,399470425 | 0,55  | 0,178670884 | 0,19  | 0,779912857 |
| 2310002F09Rik | -0,67 | 0,262000203 | 0,07  | 0,932822524 | 0,15  | 0,837177015 | 0,39  | 0,274729291 | -0,02 | 0,981873577 |
| 2310002L09Rik | -0,05 | 0,925510521 | 0,04  | 0,955998286 | -0,05 | 0,95204022  | 0,34  | 0,655842156 | 0,29  | 0,716229308 |
| 2310003L06Rik | 0,02  | 0,980913066 | -0,13 | 0,781665479 | -0,07 | 0,906709737 | -0,21 | 0,529366123 | -0,05 | 0,950965682 |
| 2310005A03Rik | -0,22 | 0,796396177 | -0,01 | 0,994148616 | -0,03 | 0,968742139 | -0,08 | 0,894805454 | -0,42 | 0,590339443 |
| 2310005E17Rik | 0,21  | 0,780773609 | -0,07 | 0,919475021 | -0,33 | 0,612793695 | -0,06 | 0,922740736 | 0,25  | 0,755982506 |
| 2310007B03Rik | -0,25 | 0,613387484 | 0,45  | 0,551072171 | 0,37  | 0,675674731 | 0,04  | 0,95852873  | 0,09  | 0,915587326 |
| 2310008N11Rik | -0,43 | 0,484387088 | -0,14 | 0,807100558 | -0,18 | 0,8026742   | -0,32 | 0,513261302 | -0,17 | 0,80222716  |
| 2310009A05Rik | 0,17  | 0,820070818 | -0,12 | 0,842663656 | 0,21  | 0,746232547 | 0,06  | 0,921731995 | -0,15 | 0,844105751 |
| 2310009B15Rik | -0,08 | 0,873017028 | -0,16 | 0,702120344 | 0,21  | 0,837376222 | 0,31  | 0,437515574 | -0,37 | 0,711637936 |
| 2310010J17Rik | -0,39 | 0,813220024 | 0,32  | 0,85154774  | -0,64 | 0,548523454 | -0,26 | 0,873305583 | -0,1  | 0,953971867 |
| 2310011J03Rik | -0,24 | 0,714662474 | -0,35 | 0,593777931 | 0,12  | 0,868590766 | 0     | 0,998945465 | -0,26 | 0,625751363 |
| 2310014F06Rik | -0,03 | 0,964154899 | 0,24  | 0,880110005 | 0,15  | 0,923350407 | -0,69 | 0,760021979 | -0,49 | 0,828679046 |
| 2310015A10Rik | -0,41 | 0,376151377 | 0,13  | 0,883093763 | 0,22  | 0,702541777 | -0,29 | 0,666828628 | 0,38  | 0,596554523 |
| 2310015D24Rik | 0,14  | 0,782876517 | 0,4   | 0,457889449 | -0,23 | 0,750624323 | -0,4  | 0,407097145 | -0,13 | 0,847758238 |
| 2310016D03Rik | 0,05  | 0,93113484  | 0,1   | 0,827496723 | 0,27  | 0,567742157 | -0,21 | 0,608277682 | -0,18 | 0,811321326 |
| 2310016D23Rik | 0,1   | 0,927072151 | -0,91 | 0,478635678 | 0,03  | 0,982305856 | -0,19 | 0,824325005 | -0,63 | 0,40189401  |
| 2310016G11Rik | 0,07  | 0,928944712 | -0,18 | 0,752804236 | 0,29  | 0,483530969 | 0,32  | 0,375975276 | 0,16  | 0,838679773 |
| 2310020H05Rik | -0,07 | 0,908108677 | 0,02  | 0,991344729 | 0,05  | 0,955303601 | -0,17 | 0,767703032 | 0,18  | 0,807266043 |
| 2310022A10Rik | -0,54 | 0,260451778 | -0,69 | 0,423104914 | 0,03  | 0,982305856 | 0,32  | 0,295171068 | -0,38 | 0,753141533 |
| 2310022B05Rik | -0,36 | 0,474777426 | -0,41 | 0,523089565 | -0,13 | 0,91596537  | 0,28  | 0,546225053 | -0,23 | 0,822818919 |
| 2310026I22Rik | -0,17 | 0,768194374 | 0,01  | 0,991023942 | 0,54  | 0,434276266 | 0,44  | 0,234389555 | 0,38  | 0,499989818 |
| 2310026L22Rik | 0,34  | 0,663119768 | -0,25 | 0,662017898 | -0,28 | 0,602775092 | 0,67  | 0,428855564 | -0,17 | 0,886154125 |

|               |       |             |       |             |       |             |       |             |       |             |
|---------------|-------|-------------|-------|-------------|-------|-------------|-------|-------------|-------|-------------|
| 2310030A07Rik | 0,51  | 0,160128708 | 0,3   | 0,514781187 | -0,33 | 0,576592414 | -0,42 | 0,372769987 | -0,28 | 0,631872562 |
| 2310030G06Rik | 0,1   | 0,816710776 | 0,35  | 0,448711076 | 0,24  | 0,655152569 | -0,7  | 0,273455433 | -0,14 | 0,911780802 |
| 2310031A07Rik | -0,36 | 0,585780254 | 0,33  | 0,679900421 | -0,05 | 0,950278774 | 0,11  | 0,75555626  | 0,64  | 0,224070009 |
| 2310033P09Rik | -0,47 | 0,253544953 | 0,19  | 0,742043497 | 0,71  | 0,164627016 | -0,12 | 0,774826947 | -0,08 | 0,922086387 |
| 2310034C09Rik | 0,07  | 0,892559851 | -0,04 | 0,943915456 | -0,05 | 0,947316802 | -0,08 | 0,828361053 | 0,06  | 0,949178165 |
| 2310034G01Rik | 0,19  | 0,750127363 | -0,13 | 0,874633803 | 0,22  | 0,759119898 | 0,13  | 0,765492221 | -0,34 | 0,627047332 |
| 2310034O05Rik | 0,14  | 0,83826579  | -0,14 | 0,892916262 | -0,65 | 0,446135567 | 0,13  | 0,818568089 | -0,03 | 0,979643119 |
| 2310035C23Rik | 0,18  | 0,789421274 | 0,09  | 0,956504634 | 0,35  | 0,744375175 | 0,18  | 0,807489629 | 0,51  | 0,503166372 |
| 2310036O22Rik | 0,16  | 0,732191837 | 0,06  | 0,958545812 | 0,14  | 0,879141223 | 0,27  | 0,500865663 | -0,02 | 0,979456872 |
| 2310039H08Rik | -0,24 | 0,54401985  | -0,15 | 0,807471759 | 0,07  | 0,91344763  | 0,27  | 0,543714405 | 0,39  | 0,456564217 |
| 2310039L15Rik | 0,18  | 0,702017115 | 0,16  | 0,783487161 | -0,14 | 0,82104737  | 0,09  | 0,841689802 | -0,16 | 0,828288883 |
| 2310040G07Rik | -0,23 | 0,727137147 | -0,12 | 0,811092266 | -0,01 | 0,991240121 | -0,14 | 0,823146103 | 0,36  | 0,640616198 |
| 2310040G24Rik | 0,29  | 0,571904456 | 0,3   | 0,495742596 | 0,24  | 0,688643408 | -0,54 | 0,147211892 | -0,1  | 0,882728747 |
| 2310043L19Rik | 0,33  | 0,520667704 | -0,3  | 0,770004485 | -0,28 | 0,815567598 | 0,31  | 0,739149218 | 0,28  | 0,804576732 |
| 2310043M15Rik | 0,15  | 0,761457464 | -0,14 | 0,782712411 | -0,06 | 0,932706021 | 0,02  | 0,965565431 | 0,03  | 0,969117862 |
| 2310043O21Rik | 0     | 0,999288019 | 0,17  | 0,689892054 | -0,5  | 0,514067718 | -0,14 | 0,691147947 | -0,54 | 0,292189647 |
| 2310044K18Rik | 0,66  | 0,268112899 | -0,12 | 0,855632384 | -0,24 | 0,725314316 | 0,11  | 0,769374738 | 0,01  | 0,994974941 |
| 2310047D07Rik | -0,11 | 0,823117065 | 0,19  | 0,697830948 | 0,05  | 0,955761087 | -0,14 | 0,68521004  | -0,1  | 0,904836805 |
| 2310050C09Rik | 0,13  | 0,792328154 | -0,02 | 0,969296652 | -0,22 | 0,661747229 | 0,06  | 0,887937123 | -0,04 | 0,968952017 |
| 2310057J18Rik | 0,07  | 0,972112267 | -0,19 | 0,853458666 | -0,42 | 0,554933299 | -0,31 | 0,675727528 | 0,31  | 0,728530603 |
| 2310057M21Rik | -0,09 | 0,911158473 | 0,02  | 0,987162042 | 0,46  | 0,343594254 | 0,17  | 0,87613802  | 0,27  | 0,789505562 |
| 2310057N15Rik | 0,13  | 0,78999702  | 0,07  | 0,920385588 | 0,2   | 0,775963444 | -0,1  | 0,928002892 | 0,07  | 0,954118891 |
| 2310058D17Rik | 0,03  | 0,981669483 | 0,05  | 0,972336944 | -0,4  | 0,540549412 | -0,6  | 0,138140977 | -0,53 | 0,549449827 |
| 2310061I04Rik | -0,22 | 0,797266879 | -0,22 | 0,664787536 | 0,16  | 0,910060392 | 0,08  | 0,904690757 | -0,25 | 0,720844381 |
| 2310061N02Rik | 0,3   | 0,778869381 | -0,22 | 0,671319666 | 0,21  | 0,77496373  | 0,27  | 0,727532726 | -0,21 | 0,820657685 |
| 2310065F04Rik | 0,19  | 0,794063226 | 0,11  | 0,918694468 | 0,09  | 0,887446966 | -0,24 | 0,80795564  | 0,64  | 0,45731544  |
| 2310067E19Rik | -0,04 | 0,970660999 | -0,05 | 0,981853964 | -0,04 | 0,973186233 | 0,22  | 0,860410443 | 0,43  | 0,709224776 |
| 2310068J16Rik | -0,07 | 0,919567534 | -0,02 | 0,985151214 | 0,07  | 0,952005428 | -0,06 | 0,896893    | -0,43 | 0,573405587 |
| 2310069B03Rik | 0,12  | 0,845495686 | 0,06  | 0,927073711 | 0,14  | 0,876684089 | -0,07 | 0,895892607 | -0,13 | 0,862867603 |
| 2310069G16Rik | 0,33  | 0,613990129 | 0,17  | 0,789363581 | 0,11  | 0,864598204 | -0,12 | 0,81705773  | 0,06  | 0,947870845 |
| 2310075C17Rik | 0,26  | 0,675654683 | 0,03  | 0,965147491 | -0,15 | 0,816360932 | 0,33  | 0,346106379 | 0,38  | 0,442579293 |
| 2310079G19Rik | 0,07  | 0,911523794 | 0,19  | 0,697111597 | 0,13  | 0,819509208 | -0,1  | 0,864379203 | -0,21 | 0,840952901 |
| 2310081J21Rik | 0,37  | 0,465168175 | -0,15 | 0,857388191 | -0,2  | 0,865148119 | -0,06 | 0,92695491  | -0,01 | 0,993293923 |
| 2310081O03Rik | 0,16  | 0,684541418 | -0,09 | 0,855632384 | -0,36 | 0,548750983 | -0,06 | 0,896599656 | 0,02  | 0,977117612 |
| 2410002F23Rik | -0,27 | 0,748637664 | -0,78 | 0,242593184 | 0,28  | 0,712506769 | 0,39  | 0,437773588 | -0,08 | 0,933307994 |

|               |       |             |       |             |       |             |       |             |       |             |
|---------------|-------|-------------|-------|-------------|-------|-------------|-------|-------------|-------|-------------|
| 2410003L11Rik | -0,03 | 0,975949545 | 0,22  | 0,815112249 | 0,13  | 0,867152476 | -0,03 | 0,978782666 | 0,01  | 0,990633766 |
| 2410004B18Rik | 0,05  | 0,935737948 | 0,02  | 0,98548055  | -0,22 | 0,804821595 | 0,36  | 0,48546658  | 0,34  | 0,562698193 |
| 2410004I01Rik | -0,31 | 0,673291416 | -0,16 | 0,892218437 | 0,01  | 0,991240121 | -0,13 | 0,814810741 | -0,17 | 0,793952361 |
| 2410004P03Rik | -0,07 | 0,931456925 | -0,02 | 0,98410255  | -0,14 | 0,923135714 | 0,14  | 0,703751395 | 0,05  | 0,966630025 |
| 2410006H16Rik | 0,9   | 0,084647125 | 0,42  | 0,302028989 | -0,38 | 0,427293731 | 0,51  | 0,138701324 | 0,44  | 0,319597889 |
| 2410012E07Rik | 0,13  | 0,761457464 | -0,11 | 0,818871477 | -0,12 | 0,881924837 | -0,15 | 0,741769627 | 0,03  | 0,979456872 |
| 2410015M20Rik | -0,04 | 0,941388557 | -0,19 | 0,832968521 | 0,21  | 0,798320169 | 0,49  | 0,208693312 | 0,04  | 0,96334532  |
| 2410016O06Rik | -0,02 | 0,98456417  | -0,55 | 0,505731706 | -0,21 | 0,73437591  | 0,45  | 0,627687724 | 0,33  | 0,823098095 |
| 2410017I17Rik | 0,1   | 0,919110324 | 0,47  | 0,428093777 | -0,52 | 0,483761569 | -0,24 | 0,718323562 | 0,24  | 0,823776279 |
| 2410021H03Rik | 0,14  | 0,750407278 | 0,09  | 0,858860016 | -0,21 | 0,62907199  | -0,11 | 0,77859184  | 0,03  | 0,97425848  |
| 2410022M11Rik | -0,04 | 0,937232549 | 0,05  | 0,932292974 | -0,17 | 0,787905724 | -0,05 | 0,893609448 | -0,25 | 0,716979399 |
| 2410089E03Rik | -0,13 | 0,90799109  | -0,18 | 0,855713502 | -0,02 | 0,987789451 | -0,17 | 0,811871922 | -0,26 | 0,705006196 |
| 2410124H12Rik | -0,17 | 0,700019125 | 0,22  | 0,653492327 | 0,07  | 0,929871006 | 0,03  | 0,966197507 | 0,01  | 0,993785683 |
| 2410131K14Rik | 0,13  | 0,886725624 | 0,44  | 0,731621986 | 0,52  | 0,641764537 | -0,7  | 0,190917389 | -0,62 | 0,381160171 |
| 2410137M14Rik | 0,53  | 0,576879913 | 0,02  | 0,996333613 | 0,32  | 0,661538963 | -0,19 | 0,778212842 | -0,38 | 0,574285481 |
| 2410141K09Rik | 0,08  | 0,892124736 | 0,2   | 0,802979985 | 0,07  | 0,94665439  | 0,01  | 0,992353899 | -0,1  | 0,890933993 |
| 2410152P15Rik | 0,04  | 0,950780433 | 0,03  | 0,947671895 | 0,05  | 0,95106142  | 0,14  | 0,730951567 | 0,23  | 0,694233384 |
| 2500002B13Rik | 0,13  | 0,935632377 | -0,22 | 0,715688609 | 0,34  | 0,733092626 | 1,01  | 0,206059207 | -0,29 | 0,726349309 |
| 2500004C02Rik | -0,07 | 0,950532575 | -0,24 | 0,568002061 | 0,16  | 0,880314343 | -0,13 | 0,87148686  | -0,54 | 0,450543672 |
| 2510002D24Rik | -0,16 | 0,779331628 | -0,29 | 0,582605692 | 0,15  | 0,845993227 | -0,19 | 0,609023716 | -0,16 | 0,821517568 |
| 2510009E07Rik | -0,55 | 0,656726345 | -1,35 | 0,109267475 | 0,63  | 0,432912125 | -0,38 | 0,708398184 | 0,3   | 0,848977077 |
| 2510039O18Rik | 0,29  | 0,504735703 | -0,09 | 0,868234125 | 0,26  | 0,697383223 | 0,15  | 0,649456235 | -0,19 | 0,841160223 |
| 2600006K01Rik | -0,1  | 0,892559851 | 0,12  | 0,817979104 | -0,07 | 0,926365431 | 0     | 0,997014319 | 0,38  | 0,608004947 |
| 2610001J05Rik | -0,2  | 0,803761785 | -0,13 | 0,882847123 | 0     | 0,999931921 | 0,29  | 0,514962191 | 0,25  | 0,635612479 |
| 2610002M06Rik | -0,19 | 0,901980679 | 0,76  | 0,510061856 | -0,16 | 0,914134206 | 0,48  | 0,625944412 | 0,54  | 0,535470748 |
| 2610005L07Rik | 0,18  | 0,841947762 | -0,73 | 0,457713517 | -0,47 | 0,507095234 | 0,41  | 0,430056151 | 0,21  | 0,789505562 |
| 2610008E11Rik | -0,06 | 0,937251448 | 0,26  | 0,692189927 | -0,89 | 0,302861841 | -0,34 | 0,357261043 | -0,53 | 0,40189401  |
| 2610016A17Rik | -0,08 | 0,873876924 | -0,03 | 0,949729668 | -0,05 | 0,956947968 | 0,13  | 0,733598985 | 0,06  | 0,941241684 |
| 2610019N06Rik | -0,22 | 0,803557792 | 0,54  | 0,781665479 | 1,1   | 0,628978443 | -1,92 | 0,028722506 | -0,36 | 0,746672639 |
| 2610020C07Rik | -0,48 | 0,599095051 | -0,28 | 0,790350061 | -0,49 | 0,630204762 | -0,07 | 0,953399024 | -0,7  | 0,558284622 |
| 2610020F03Rik | 0,13  | 0,804417792 | -0,2  | 0,691058901 | 0,06  | 0,9346616   | 0,3   | 0,377338868 | 0,21  | 0,755677288 |
| 2610020H08Rik | 0,36  | 0,769716601 | -0,28 | 0,638366221 | 1,02  | 0,312094279 | 0,32  | 0,690223391 | -0,82 | 0,257751018 |
| 2610021A01Rik | -0,53 | 0,597519827 | 0,64  | 0,474106654 | -0,63 | 0,700186861 | -0,59 | 0,471429555 | -0,06 | 0,979456872 |
| 2610027K06Rik | 0,17  | 0,854682965 | 0,05  | 0,956049982 | -0,24 | 0,674079328 | 0,05  | 0,947809027 | 0,27  | 0,698115018 |
| 2610028E06Rik | 0,04  | 0,957398577 | -0,35 | 0,733269724 | -0,6  | 0,382042571 | 0,26  | 0,676010477 | -0,03 | 0,979392852 |

|                |       |             |       |             |       |             |       |             |       |             |
|----------------|-------|-------------|-------|-------------|-------|-------------|-------|-------------|-------|-------------|
| 2610028H24Rik  | 0,41  | 0,591725454 | 0,46  | 0,645617414 | 0,34  | 0,661747229 | -0,33 | 0,626029171 | 0,14  | 0,904280267 |
| 2610035D17Rik  | 0,18  | 0,8870224   | 0,2   | 0,800821935 | 0,15  | 0,894229514 | -1,41 | 0,057868203 | -0,66 | 0,287590871 |
| 2610035F20Rik  | 0,34  | 0,399240334 | 0,15  | 0,910022982 | 0,15  | 0,902637441 | 0,19  | 0,75257554  | -0,1  | 0,948163009 |
| 2610037D02Rik  | 0,09  | 0,897512359 | 0     | 0,999567982 | 0,12  | 0,836779352 | 0,24  | 0,790298453 | -0,02 | 0,985266733 |
| 2610037P13Rik  | 0,13  | 0,952540667 | -0,14 | 0,901000778 | -0,24 | 0,89916929  | -0,33 | 0,690442683 | 0,67  | 0,525188239 |
| 2610042L04Rik  | 0,63  | 0,149941264 | 0,4   | 0,500510261 | -0,65 | 0,301616442 | 0,01  | 0,986768223 | 0,2   | 0,815693459 |
| 2610044O15Rik8 | 0     | 0,999963707 | -0,93 | 0,619807116 | 0,84  | 0,334583767 | -0,17 | 0,896784368 | -1,41 | 0,160155445 |
| 2610100L16Rik  | 0,06  | 0,907008083 | -0,06 | 0,916496897 | -0,44 | 0,497993154 | -0,07 | 0,872022622 | -0,02 | 0,980961333 |
| 2610203C22Rik  | -0,63 | 0,353593061 | -0,4  | 0,674679234 | 1,29  | 0,097897914 | 0,75  | 0,283658136 | -0,1  | 0,939169005 |
| 2610204G07Rik  | -0,07 | 0,895871179 | 0,04  | 0,956049982 | -0,22 | 0,714796589 | -0,04 | 0,931477012 | -0,06 | 0,947287491 |
| 2610206C17Rik  | -0,31 | 0,389268664 | -0,07 | 0,954324398 | 0,19  | 0,777417583 | 0,47  | 0,381974077 | 0,1   | 0,872242794 |
| 2610209C05Rik  | -0,2  | 0,701086418 | -0,13 | 0,781665479 | 0,02  | 0,991456043 | -0,11 | 0,835573451 | -0,08 | 0,940092696 |
| 2610301B20Rik  | -0,18 | 0,892092463 | -0,2  | 0,88632917  | 0,24  | 0,909963525 | 0,05  | 0,982534991 | 0,5   | 0,765809384 |
| 2610303G11Rik  | -0,17 | 0,828910401 | 0,38  | 0,646170664 | 0,69  | 0,298956409 | -0,27 | 0,551847199 | -0,15 | 0,850599661 |
| 2610306M01Rik  | -0,19 | 0,768194374 | 0,19  | 0,858064544 | -0,3  | 0,611144549 | -0,77 | 0,122551381 | 0,15  | 0,827532593 |
| 2610307P16Rik  | -0,45 | 0,440266426 | 0     | 1           | 0,19  | 0,877023506 | -0,08 | 0,886164589 | -0,13 | 0,863544853 |
| 2610316D01Rik  | -0,3  | 0,519823113 | -0,01 | 0,989036108 | -0,32 | 0,7297329   | 0,22  | 0,676136168 | 0,26  | 0,590339443 |
| 2610318N02Rik  | -0,16 | 0,827830958 | -1,2  | 0,354604974 | 0,23  | 0,672490033 | 1,88  | 0,026588488 | 0,03  | 0,987910986 |
| 2610507B11Rik  | -0,15 | 0,820885722 | 0,4   | 0,359483031 | -0,33 | 0,450605545 | 0,83  | 0,235558038 | 0,85  | 0,238847493 |
| 2610507I01Rik  | -0,21 | 0,623941869 | 0,18  | 0,816018979 | 0,28  | 0,859411859 | 0,1   | 0,908141892 | -0,52 | 0,521069462 |
| 2610524H06Rik  | -0,16 | 0,78682706  | -0,34 | 0,601295905 | 0,44  | 0,717856288 | 1,58  | 0,044055596 | -0,66 | 0,608004947 |
| 2610528A11Rik  | 0,41  | 0,460231397 | 0,03  | 0,991131565 | -0,19 | 0,855320495 | -0,21 | 0,726795266 | -0,11 | 0,912250982 |
| 2610528J11Rik  | -0,1  | 0,897717279 | -0,53 | 0,354667412 | 0,03  | 0,982305856 | 0,2   | 0,799176054 | -0,21 | 0,859663155 |
| 2700029M09Rik  | -0,49 | 0,490731724 | -0,43 | 0,466954112 | 0,19  | 0,861307315 | 0,18  | 0,855041248 | -0,32 | 0,731865047 |
| 2700033N17Rik  | 0,27  | 0,659879365 | -0,2  | 0,661566887 | -0,29 | 0,750624323 | -1,24 | 0,029700829 | -0,04 | 0,96377007  |
| 2700038G22Rik  | 0,44  | 0,59648949  | 0,29  | 0,71865307  | -0,27 | 0,777918093 | 0,07  | 0,945487259 | 0,72  | 0,411012096 |
| 2700046A07Rik  | 0,43  | 0,573661766 | -0,03 | 0,975765252 | -0,05 | 0,978207511 | -0,99 | 0,087952172 | -0,88 | 0,443067005 |
| 2700046G09Rik  | -0,17 | 0,760872819 | -0,07 | 0,89081665  | -0,5  | 0,517667372 | -0,05 | 0,949669541 | 0,15  | 0,830086988 |
| 2700049A03Rik  | -0,1  | 0,928103232 | -0,29 | 0,664787536 | 0,29  | 0,760857618 | -0,32 | 0,553029193 | -0,59 | 0,32285712  |
| 2700054A10Rik  | -0,09 | 0,923002711 | 0,03  | 0,966717367 | -0,2  | 0,756274956 | -0,01 | 0,979212436 | 0,14  | 0,854369491 |
| 2700060E02Rik  | 0,49  | 0,239601221 | 0,14  | 0,855632384 | -0,36 | 0,824460336 | 0,7   | 0,271968186 | 0,28  | 0,744840641 |
| 2700062C07Rik  | -0,49 | 0,61200942  | -0,92 | 0,538283657 | 0,46  | 0,753280744 | -0,18 | 0,920589831 | 0,24  | 0,885777129 |
| 2700068H02Rik  | 0,21  | 0,571059837 | 0,26  | 0,667502888 | -0,05 | 0,95204022  | -0,19 | 0,586887461 | -0,16 | 0,816986247 |
| 2700069I18Rik  | -0,87 | 0,197931266 | 0,01  | 0,995205602 | -0,12 | 0,841563482 | -0,18 | 0,785329999 | -0,28 | 0,697818445 |
| 2700070H01Rik  | 0,14  | 0,742958309 | 0,05  | 0,949729668 | -0,34 | 0,613222642 | -0,11 | 0,768596385 | 0,56  | 0,274700497 |



|                |       |             |       |             |       |             |       |             |       |             |
|----------------|-------|-------------|-------|-------------|-------|-------------|-------|-------------|-------|-------------|
| 2700081O15Rik  | 0,18  | 0,774473335 | 0,12  | 0,908181649 | -0,63 | 0,412477493 | 0,43  | 0,414331052 | 0,82  | 0,241439356 |
| 2700089I24Rik  | 0,1   | 0,950532575 | 0,08  | 0,911020075 | 0,18  | 0,841053092 | -0,2  | 0,701120598 | -0,4  | 0,597080822 |
| 2700094K13Rik  | -0,47 | 0,281648139 | -0,48 | 0,467443634 | 0,68  | 0,145335521 | 1,65  | 0,023392296 | -0,54 | 0,219224272 |
| 2700097O09Rik  | 0     | 1           | -0,13 | 0,785128233 | -0,64 | 0,435556279 | -0,19 | 0,770163338 | 0,07  | 0,94250983  |
| 2700099C18Rik  | -0,14 | 0,881128854 | -0,99 | 0,300191093 | 0,48  | 0,618146048 | 1,21  | 0,200210053 | 0,97  | 0,198284174 |
| 2810001G20Rik  | 0,01  | 0,995165528 | -0,26 | 0,544380607 | -0,02 | 0,982330717 | -0,42 | 0,233129138 | 0,47  | 0,356465925 |
| 2810002D19Rik  | -0,09 | 0,907391935 | 0,12  | 0,807175471 | -0,29 | 0,663029337 | -0,33 | 0,455822826 | -0,23 | 0,761747464 |
| 2810004N23Rik  | 0,05  | 0,934482351 | -0,06 | 0,930554123 | 0,73  | 0,114280228 | 0,56  | 0,090439001 | -0,03 | 0,976743304 |
| 2810006K23Rik  | -0,27 | 0,559714431 | -0,4  | 0,387812651 | 0,16  | 0,868054401 | -0,58 | 0,357477395 | -0,46 | 0,537706015 |
| 2810013P06Rik  | 0,01  | 0,990894139 | 0,16  | 0,71865307  | -0,38 | 0,62535327  | -1,94 | 0,009073953 | -0,13 | 0,83005877  |
| 2810021J22Rik  | -0,08 | 0,912338018 | -0,02 | 0,982137548 | 0,06  | 0,953074345 | -0,08 | 0,896599656 | -0,39 | 0,4077475   |
| 2810025M15Rik  | -0,47 | 0,302364386 | -0,52 | 0,302028989 | 0,44  | 0,465282583 | 0,72  | 0,214242928 | -0,72 | 0,257446296 |
| 2810029C07Rik  | 0     | 0,997205466 | 0,05  | 0,940111449 | 0,18  | 0,814441474 | -0,29 | 0,74417234  | -0,31 | 0,835191    |
| 2810030D12Rik  | 0,04  | 0,95837965  | -0,04 | 0,958545812 | -0,17 | 0,76370647  | 0,42  | 0,32504036  | 0,07  | 0,916297433 |
| 2810032G03Rik  | 0,48  | 0,305258141 | -0,06 | 0,920755087 | -0,12 | 0,914096988 | 0,25  | 0,732505868 | -0,24 | 0,823098095 |
| 2810039B14Rik  | 0     | 0,998449912 | 0,06  | 0,906678859 | -0,09 | 0,90647897  | -0,25 | 0,549383468 | 0,2   | 0,719285827 |
| 2810047C21Rik1 | 1,04  | 0,358366747 | 0,46  | 0,696259711 | 0,22  | 0,847402011 | 0,97  | 0,325923875 | 1,47  | 0,075825829 |
| 2810049E08Rik  | 0,23  | 0,651619238 | 0,07  | 0,873446866 | -0,08 | 0,922318683 | -0,07 | 0,882715112 | -0,18 | 0,794769197 |
| 2810402E24Rik  | 0,05  | 0,960720096 | -0,07 | 0,952352299 | 0,31  | 0,736203613 | -0,1  | 0,767482309 | 0,02  | 0,984187689 |
| 2810403A07Rik  | 0,44  | 0,226269901 | 0,56  | 0,171919858 | -0,78 | 0,179552168 | -0,14 | 0,805452009 | 0,24  | 0,777221651 |
| 2810403D21Rik  | -0,34 | 0,673270664 | -0,26 | 0,894022563 | -0,76 | 0,271482188 | -0,2  | 0,920929266 | -0,74 | 0,552810377 |
| 2810404F17Rik  | -0,1  | 0,859600103 | 0,01  | 0,994567885 | 0,02  | 0,984778342 | 0,23  | 0,639108834 | 0,2   | 0,823125838 |
| 2810404M03Rik  | 0,29  | 0,662416763 | -0,14 | 0,882847123 | 0,39  | 0,406392004 | 0,26  | 0,81096279  | -0,28 | 0,76521225  |
| 2810405F15Rik  | 0,11  | 0,794147852 | -0,03 | 0,952211046 | -0,17 | 0,746570045 | -0,03 | 0,936218995 | 0,26  | 0,640213665 |
| 2810407A14Rik  | 0,18  | 0,870145675 | 0,26  | 0,748123243 | 0,02  | 0,99147958  | 0,04  | 0,967585908 | 0,41  | 0,630151021 |
| 2810408A11Rik  | -0,23 | 0,794588318 | 0,57  | 0,245917773 | 0,64  | 0,222261109 | 0,14  | 0,8914104   | 0,04  | 0,978604922 |
| 2810408I11Rik  | -0,17 | 0,774473335 | -0,84 | 0,256819283 | 0,4   | 0,337509636 | 1,16  | 0,034158722 | -0,02 | 0,986418729 |
| 2810410L24Rik  | -0,3  | 0,659175711 | 0,32  | 0,796482292 | 0,15  | 0,88128606  | -0,19 | 0,621558242 | 0,25  | 0,694233384 |
| 2810417H13Rik  | -1,43 | 0,048513596 | -3,3  | 0,043236689 | 1,52  | 0,048189455 | 3,89  | 0,004853653 | -0,21 | 0,745134899 |
| 2810428I15Rik  | 0,08  | 0,882119027 | -0,4  | 0,428093777 | 0,12  | 0,86834176  | -0,08 | 0,878417314 | -0,24 | 0,705203579 |
| 2810429I04Rik  | 0,07  | 0,936611783 | -0,39 | 0,656768093 | 0,94  | 0,037381207 | 1,14  | 0,017429369 | 0,34  | 0,585244465 |
| 2810430I11Rik  | 0,11  | 0,840654169 | -0,14 | 0,847592787 | 0,07  | 0,947117869 | 0,11  | 0,849242587 | 0,01  | 0,990091016 |
| 2810433D01Rik  | -0,01 | 0,995973965 | 0,04  | 0,937424389 | 0,19  | 0,76370647  | 0,25  | 0,443794356 | -0,11 | 0,879165851 |
| 2810442N19Rik  | 0,03  | 0,968500829 | -0,12 | 0,825210924 | -0,22 | 0,741249056 | 0,14  | 0,747830911 | 0,23  | 0,75103789  |
| 2810454H06Rik  | 0,14  | 0,791503902 | 0     | 1           | 0,06  | 0,931836661 | -0,04 | 0,940891309 | 0,33  | 0,649846438 |

|               |       |             |       |             |       |             |       |             |       |             |
|---------------|-------|-------------|-------|-------------|-------|-------------|-------|-------------|-------|-------------|
| 2810455O05Rik | -0,17 | 0,783576927 | -0,49 | 0,557875295 | 0,33  | 0,473574592 | 0,21  | 0,658281831 | -0,51 | 0,381160171 |
| 2810459M11Rik | 0,36  | 0,446685156 | 0,37  | 0,442884795 | -0,25 | 0,62103113  | 0,01  | 0,996195661 | 0,35  | 0,523298401 |
| 2810468N07Rik | 0,13  | 0,851366054 | 0,14  | 0,791426435 | -0,1  | 0,894018349 | -0,23 | 0,59109005  | -0,06 | 0,947437555 |
| 2810471M01Rik | 0,54  | 0,46799262  | -0,16 | 0,932918674 | 0,15  | 0,938291859 | 0,48  | 0,567629835 | 0,39  | 0,655941103 |
| 2810474O19Rik | 0,26  | 0,747211305 | 0,37  | 0,637232635 | 0,65  | 0,689058581 | -0,79 | 0,055692769 | 0,12  | 0,877577668 |
| 2900005J15Rik | -0,33 | 0,600313897 | -0,04 | 0,940111449 | -0,37 | 0,62332895  | -0,24 | 0,661916932 | 0,21  | 0,824818547 |
| 2900009J06Rik | 0,17  | 0,813460438 | 0,17  | 0,814499098 | -0,08 | 0,938322304 | 0,21  | 0,560982663 | -0,05 | 0,948935854 |
| 2900011O08Rik | -0,32 | 0,531080123 | 0,31  | 0,472042875 | -0,15 | 0,823823322 | -0,22 | 0,542020162 | -0,04 | 0,970154126 |
| 2900026A02Rik | -0,69 | 0,185196531 | -0,76 | 0,283522096 | 0,3   | 0,638965268 | 0,27  | 0,563786734 | -1,18 | 0,055347292 |
| 2900041M22Rik | 0,14  | 0,81124357  | -0,04 | 0,955382206 | -0,3  | 0,62560624  | -0,82 | 0,382558073 | 0,16  | 0,884640084 |
| 2900052L18Rik | -0,07 | 0,92366013  | 0,25  | 0,707806354 | 0     | 0,997637749 | -0,67 | 0,183385622 | -0,05 | 0,952753183 |
| 2900052N01Rik | 0,01  | 0,990581355 | 0,21  | 0,666450149 | -0,27 | 0,616951972 | -0,07 | 0,895988154 | -0,23 | 0,656756924 |
| 2900055J20Rik | 0,1   | 0,86074926  | 0,01  | 0,985172298 | 0,06  | 0,941254389 | 0,15  | 0,710455726 | 0,28  | 0,636784137 |
| 2900057B20Rik | 0,1   | 0,829299665 | 0,04  | 0,95905116  | -0,31 | 0,565399055 | -0,09 | 0,902657593 | 0,04  | 0,97425848  |
| 2900060B14Rik | 0,13  | 0,829299665 | 0,26  | 0,65582744  | -0,56 | 0,584320897 | -1,15 | 0,117589332 | 0,24  | 0,715928244 |
| 2900072N19Rik | -0,1  | 0,847439855 | 0,04  | 0,938903337 | -0,24 | 0,723896318 | 0,1   | 0,827764222 | 0,02  | 0,983469081 |
| 2900076A07Rik | 0,05  | 0,946346081 | 0,67  | 0,324694411 | -0,45 | 0,500343254 | -1,47 | 0,111509942 | -0,2  | 0,900126162 |
| 2900079G21Rik | -0,35 | 0,701086418 | -0,29 | 0,561035617 | -0,3  | 0,693655482 | -0,12 | 0,8785865   | -0,13 | 0,879059954 |
| 2900089D17Rik | 0,04  | 0,969486005 | 0,18  | 0,818871477 | 0,09  | 0,946237452 | -0,15 | 0,78342209  | -0,29 | 0,608004947 |
| 2900092C05Rik | -0,2  | 0,672882915 | 0,22  | 0,691896895 | -0,05 | 0,953951069 | -0,1  | 0,77038356  | 0,16  | 0,866693394 |
| 2900092D14Rik | 0,15  | 0,701297763 | -0,07 | 0,88741189  | 0,14  | 0,836625711 | 0,03  | 0,952060403 | 0,35  | 0,641887778 |
| 2900097C17Rik | -0,19 | 0,664953069 | -0,04 | 0,93451524  | 0,1   | 0,859578966 | 0,11  | 0,742706747 | -0,15 | 0,808079104 |
| 3000002C10Rik | -0,03 | 0,962364809 | -0,15 | 0,732847182 | 0,05  | 0,955257293 | 0,36  | 0,31191739  | -0,19 | 0,727066601 |
| 3010001F23Rik | -0,12 | 0,919567534 | -0,32 | 0,832841509 | -0,31 | 0,725725788 | 0,86  | 0,504754586 | 0,42  | 0,673145862 |
| 3010003L21Rik | -0,12 | 0,910211895 | 0,08  | 0,882847123 | 0,45  | 0,715403033 | 0,77  | 0,166243072 | 0,76  | 0,256989438 |
| 3010026O09Rik | -0,73 | 0,200222183 | -0,1  | 0,92731256  | 0,53  | 0,243511638 | 0,21  | 0,677265557 | -0,45 | 0,391113982 |
| 3100002H09Rik | 0,43  | 0,354465879 | 0,11  | 0,94330471  | -0,09 | 0,913639858 | 0,02  | 0,985865561 | 0     | 0,999184909 |
| 3100003L05Rik | 0,03  | 0,969486005 | 0,22  | 0,785128233 | -0,13 | 0,813180174 | 0,01  | 0,991453278 | 0,23  | 0,786434393 |
| 3110001I22Rik | 0,15  | 0,817598796 | -0,17 | 0,819516105 | -0,18 | 0,901410016 | 0,23  | 0,623972583 | 0,37  | 0,477604107 |
| 3110002H16Rik | 0,34  | 0,410773729 | 0,01  | 0,998239324 | 1,15  | 0,044715282 | 0,62  | 0,409576257 | -0,74 | 0,326522052 |
| 3110004A20Rik | 0,2   | 0,633127066 | 0,02  | 0,981758111 | -0,29 | 0,571405665 | -0,1  | 0,886903189 | -0,24 | 0,763277172 |
| 3110006O06Rik | -0,07 | 0,912991344 | 0,06  | 0,903674951 | -0,11 | 0,911115541 | 0,04  | 0,932803079 | 0,3   | 0,830086988 |
| 3110009E18Rik | -0,4  | 0,600952042 | 0,41  | 0,565603216 | -0,08 | 0,969247498 | -0,14 | 0,89865617  | 0,22  | 0,888182112 |
| 3110009F21Rik | 0,21  | 0,600392256 | 0,06  | 0,954024651 | -0,21 | 0,712220746 | -0,6  | 0,40199632  | -0,11 | 0,891011128 |
| 3110009M11Rik | 0,21  | 0,826457489 | 0,4   | 0,528720196 | -0,08 | 0,921090652 | 0,02  | 0,977322993 | 0,21  | 0,848472475 |

|               |       |             |       |             |       |             |       |             |       |             |
|---------------|-------|-------------|-------|-------------|-------|-------------|-------|-------------|-------|-------------|
| 3110015C05Rik | 0,47  | 0,22556036  | -0,31 | 0,746178828 | 0,08  | 0,930193129 | 0,5   | 0,548190684 | 0,36  | 0,545102028 |
| 3110018I06Rik | 0,3   | 0,434641897 | 0,18  | 0,736348756 | -0,05 | 0,947460329 | 0,17  | 0,687560664 | 0,13  | 0,864540232 |
| 3110021A11Rik | 0,12  | 0,829299665 | -0,04 | 0,933981654 | -0,18 | 0,715497532 | 0,09  | 0,886959671 | 0,28  | 0,686520061 |
| 3110021N24Rik | 0,04  | 0,961694454 | 0,03  | 0,959837002 | -0,04 | 0,975119638 | -0,14 | 0,905100368 | 0,2   | 0,869765418 |
| 3110035E14Rik | 0,34  | 0,435472666 | 0,27  | 0,781665479 | 0,03  | 0,984407511 | -0,33 | 0,499384622 | -0,21 | 0,753328965 |
| 3110039I08Rik | -0,07 | 0,95290436  | 0,14  | 0,816938367 | 0,43  | 0,544907596 | -1,31 | 0,060016564 | -0,72 | 0,272986942 |
| 3110039M20Rik | -0,66 | 0,651732317 | 0,17  | 0,794404033 | 1,6   | 0,247304394 | -0,52 | 0,543144223 | 0,05  | 0,977775233 |
| 3110040M04Rik | 0,07  | 0,879499432 | 0,05  | 0,92855984  | -0,3  | 0,591404136 | 0     | 1           | 0     | 0,998746436 |
| 3110040N11Rik | 0,05  | 0,942948768 | -0,28 | 0,602028255 | 0,07  | 0,933825205 | 0,3   | 0,510589408 | -0,47 | 0,511300791 |
| 3110043O21Rik | 0,6   | 0,249194174 | 0,45  | 0,314703215 | -0,28 | 0,76994964  | 0,76  | 0,204120985 | 0,5   | 0,450585402 |
| 3110045C21Rik | -0,28 | 0,551578148 | -0,71 | 0,688450928 | 0     | 0,998071906 | -0,14 | 0,921731995 | -0,43 | 0,735796038 |
| 3110052M02Rik | 0,37  | 0,761120978 | -0,44 | 0,35804906  | -0,67 | 0,174936325 | -0,91 | 0,089837193 | -0,35 | 0,651862586 |
| 3110056K07Rik | 0,11  | 0,867574449 | 0,28  | 0,854940418 | -0,11 | 0,921956183 | -0,71 | 0,475272978 | 0,17  | 0,894623317 |
| 3110062M04Rik | -0,11 | 0,854494118 | -0,08 | 0,889785563 | 0,11  | 0,933384842 | -0,59 | 0,112780918 | -0,39 | 0,505746761 |
| 3110070M22Rik | 0,25  | 0,746776941 | 0     | 1           | 0,26  | 0,626023926 | 0,02  | 0,966701307 | -0,31 | 0,590396118 |
| 3110079O15Rik | -0,08 | 0,898269435 | -0,09 | 0,932292974 | -0,06 | 0,941627748 | -0,1  | 0,908141892 | -0,03 | 0,984125319 |
| 3110082I17Rik | -0,01 | 0,99658     | -0,52 | 0,585443341 | -0,05 | 0,97868016  | -0,75 | 0,075762884 | -0,07 | 0,939248399 |
| 3110082J24Rik | -0,19 | 0,728539265 | -0,17 | 0,888542987 | 0,18  | 0,830860598 | -0,32 | 0,598473186 | -0,4  | 0,445196556 |
| 3110083C13Rik | -0,19 | 0,689966234 | 0,01  | 0,998237793 | -0,09 | 0,929395646 | 0,06  | 0,914828446 | -0,18 | 0,862867603 |
| 3110099E03Rik | 0,27  | 0,718996404 | -0,33 | 0,49125334  | -0,28 | 0,623526739 | -2,28 | 0,031574061 | -0,74 | 0,535065209 |
| 3200001D21Rik | -0,25 | 0,67806773  | 0,18  | 0,797648417 | -0,12 | 0,870263371 | -0,07 | 0,903739255 | 0,2   | 0,757342197 |
| 3222401L13Rik | 0,21  | 0,776839834 | 0,04  | 0,980385701 | 0     | 0,998479656 | -1,36 | 0,086968945 | -0,37 | 0,535927957 |
| 3300002A11Rik | 0,27  | 0,714127381 | -0,16 | 0,83095935  | -0,4  | 0,431722201 | -0,01 | 0,994761295 | 0,12  | 0,916893579 |
| 3300002I08Rik | -0,1  | 0,946976046 | -0,27 | 0,879693148 | 0,27  | 0,746232547 | 0,06  | 0,897599603 | -0,22 | 0,73862837  |
| 3300005D01Rik | -0,13 | 0,892154362 | -0,08 | 0,887752277 | -0,45 | 0,363565369 | 0,2   | 0,73574774  | 0,15  | 0,881943508 |
| 3425401B19Rik | 0,08  | 0,921565185 | -0,09 | 0,86814383  | 0,05  | 0,944441051 | 0     | 1           | 0,07  | 0,942854766 |
| 3632451O06Rik | -0,12 | 0,895400682 | -0,11 | 0,935041212 | -0,05 | 0,959376967 | 0,19  | 0,690664654 | -0,05 | 0,961406182 |
| 3632454L22Rik | 0,66  | 0,189684245 | 0,32  | 0,7439672   | -0,37 | 0,552331473 | -0,23 | 0,744237266 | -0,25 | 0,79265811  |
| 3830403N18Rik | 0,31  | 0,791284141 | -0,34 | 0,792086001 | 0,45  | 0,709846532 | 1,09  | 0,409576257 | -0,23 | 0,859663155 |
| 3830406C13Rik | -0,16 | 0,857971313 | 0,19  | 0,896065393 | 0,91  | 0,305294072 | -0,45 | 0,700431952 | 0     | 0,999775166 |
| 3830408C21Rik | 0,06  | 0,953269094 | 0,11  | 0,901000778 | -0,21 | 0,778229134 | -0,59 | 0,789594992 | -0,73 | 0,681597394 |
| 3830417A13Rik | -0,18 | 0,793209485 | 0,09  | 0,948496432 | 0,01  | 0,993379272 | -0,21 | 0,854342596 | -0,39 | 0,754099916 |
| 3930402G23Rik | -0,11 | 0,84900712  | 0,13  | 0,911024505 | -0,26 | 0,75200406  | 0,61  | 0,335213853 | 0,44  | 0,365979988 |
| 4430402I18Rik | 0,49  | 0,568455852 | -0,41 | 0,842430108 | -0,54 | 0,527929204 | -0,6  | 0,364250425 | -1    | 0,086460103 |
| 4631405J19Rik | 0,21  | 0,808947569 | 0     | 0,999546856 | 0,18  | 0,841563482 | -0,37 | 0,454418988 | -0,06 | 0,962631948 |

|               |       |             |       |             |       |             |       |             |       |             |
|---------------|-------|-------------|-------|-------------|-------|-------------|-------|-------------|-------|-------------|
| 4631405K08Rik | 0,06  | 0,931445059 | 0,24  | 0,664787536 | -0,18 | 0,709222239 | -0,49 | 0,4043538   | -0,4  | 0,585118808 |
| 4632404H12Rik | -0,46 | 0,421378808 | -0,41 | 0,703255839 | -1,1  | 0,068894819 | -0,75 | 0,249114503 | 0,43  | 0,682929195 |
| 4632411P08Rik | 0,23  | 0,750634506 | -0,12 | 0,803595683 | -0,01 | 0,990836784 | 0,02  | 0,975687196 | 0,21  | 0,744868254 |
| 4632415L05Rik | 0,34  | 0,687662951 | 0,04  | 0,974072832 | -0,2  | 0,851593229 | -1,04 | 0,190359582 | -0,04 | 0,980945466 |
| 4632427E13Rik | 0,74  | 0,175572914 | 0,55  | 0,276578805 | -0,25 | 0,753482144 | -0,62 | 0,089694324 | 0,31  | 0,619885789 |
| 4632428C04Rik | -0,01 | 0,993810522 | 0,21  | 0,781046971 | -0,22 | 0,701414584 | 0,25  | 0,549053352 | 0,07  | 0,944229706 |
| 4632433K11Rik | 0,24  | 0,64776317  | 0,24  | 0,541518605 | 0,14  | 0,856218874 | -0,64 | 0,249212736 | -0,71 | 0,341238778 |
| 4731417B20Rik | 0,19  | 0,663309422 | -0,02 | 0,970020205 | 0,22  | 0,712697139 | 0,03  | 0,946205705 | -0,06 | 0,943977375 |
| 4731419I09Rik | -0,11 | 0,821541936 | 0,08  | 0,868839934 | -0,01 | 0,993379272 | 0,06  | 0,892023383 | 0,01  | 0,992370267 |
| 4732414G09Rik | -0,09 | 0,844187741 | -0,04 | 0,95830747  | -0,01 | 0,995568713 | -0,03 | 0,957674095 | 0,07  | 0,937446198 |
| 4732416N19Rik | 0,07  | 0,907391935 | 0,04  | 0,952427593 | -0,03 | 0,967304745 | -0,35 | 0,41855272  | 0,25  | 0,736140152 |
| 4732419C18Rik | 0,06  | 0,925910825 | 0,06  | 0,958545812 | -0,04 | 0,964659521 | -0,02 | 0,981262363 | -0,29 | 0,729876686 |
| 4732440D04Rik | 0,61  | 0,573098005 | -0,26 | 0,487771533 | 0     | 0,998631121 | -0,33 | 0,640127733 | 0,2   | 0,792732275 |
| 4732456N10Rik | -0,23 | 0,785012364 | 0,01  | 0,998848007 | -0,3  | 0,628048897 | -0,56 | 0,111487533 | -0,48 | 0,424134691 |
| 4732463B04Rik | 0,28  | 0,72711401  | 0,17  | 0,747707816 | -0,15 | 0,808233186 | -0,12 | 0,82581314  | 0,01  | 0,994774512 |
| 4732465J04Rik | 0,16  | 0,801669411 | 0,26  | 0,818301748 | -0,04 | 0,968067891 | 0,17  | 0,825899927 | -0,26 | 0,796146369 |
| 4732471J01Rik | -0,27 | 0,569100385 | -0,26 | 0,790939978 | -0,3  | 0,760374956 | -0,44 | 0,4276043   | -0,03 | 0,980961333 |
| 4732490B19Rik | -0,03 | 0,979962175 | -0,31 | 0,518533895 | 0,19  | 0,829543101 | 0,44  | 0,328062759 | -0,09 | 0,905581898 |
| 4732491K20Rik | -0,36 | 0,513299782 | -0,25 | 0,622588096 | -0,19 | 0,792384474 | 0,09  | 0,855041248 | -0,13 | 0,885777129 |
| 4831410D14    | -0,04 | 0,961223059 | -0,02 | 0,975864019 | 0,08  | 0,903366838 | 0,38  | 0,235443733 | 0,47  | 0,412253278 |
| 4831440D22Rik | -0,23 | 0,62872508  | 0,18  | 0,696454519 | -0,04 | 0,961293403 | -0,21 | 0,563573506 | 0,07  | 0,93992804  |
| 4831440E17Rik | -0,42 | 0,552940583 | -0,64 | 0,176214568 | -0,07 | 0,954453764 | -0,21 | 0,70138957  | 0,14  | 0,880202418 |
| 4833411C07Rik | -0,29 | 0,496008309 | -0,18 | 0,729194445 | 0,17  | 0,750874251 | -0,17 | 0,716805615 | 0,14  | 0,900126162 |
| 4833412C05Rik | 0,45  | 0,465168175 | -0,17 | 0,868912646 | 0,07  | 0,932706021 | -0,05 | 0,967866794 | 0,12  | 0,929312654 |
| 4833413E03Rik | 0,29  | 0,601340174 | -0,03 | 0,984454324 | -0,04 | 0,962459789 | -0,03 | 0,94835703  | -0,15 | 0,804576732 |
| 4833417C18Rik | -0,17 | 0,851226042 | 0,29  | 0,620236896 | 0,14  | 0,809137779 | -0,96 | 0,248620467 | -0,2  | 0,868529339 |
| 4833418N02Rik | -0,35 | 0,785491059 | -0,7  | 0,561035617 | 0,42  | 0,595675775 | -0,74 | 0,406029112 | -0,44 | 0,701874538 |
| 4833419F23Rik | -0,04 | 0,98225675  | 0,7   | 0,424403073 | -1,09 | 0,230173776 | -1,78 | 0,015382857 | 0,35  | 0,583064152 |
| 4833420G17Rik | -0,05 | 0,962857082 | -0,17 | 0,834124745 | 0,1   | 0,902637441 | -0,15 | 0,742706747 | -0,38 | 0,54267439  |
| 4833422C13Rik | 0,18  | 0,845909731 | -0,12 | 0,934286493 | 0,2   | 0,746588628 | 0,04  | 0,949239972 | -0,01 | 0,988334908 |
| 4833422M21Rik | -0,18 | 0,720712211 | 0,19  | 0,800191117 | -0,29 | 0,657033969 | -0,06 | 0,952410955 | 0,42  | 0,547497757 |
| 4833423E24Rik | 0,05  | 0,959985598 | 0,02  | 0,980518468 | -0,14 | 0,843623661 | -0,11 | 0,909892931 | 0,15  | 0,876418697 |
| 4833423F13Rik | -0,07 | 0,940936429 | 0     | 1           | -0,37 | 0,625745801 | 0,22  | 0,71158821  | 0,26  | 0,745574572 |
| 4833427F10Rik | 0,31  | 0,726465939 | -0,6  | 0,203321969 | -0,51 | 0,558381363 | -0,01 | 0,998810504 | 0,07  | 0,955654991 |
| 4833427G06Rik | 0,44  | 0,68161851  | 0,9   | 0,244058374 | -0,32 | 0,727548313 | -0,15 | 0,702700394 | 0,05  | 0,953608718 |

|               |       |             |       |             |       |             |       |             |       |             |
|---------------|-------|-------------|-------|-------------|-------|-------------|-------|-------------|-------|-------------|
| 4833428L15Rik | 0,02  | 0,988879185 | 0,05  | 0,959837002 | -0,52 | 0,38556796  | 0,28  | 0,695201039 | -0,44 | 0,673287161 |
| 4833432E10Rik | 0,08  | 0,869225685 | -0,11 | 0,816018979 | -0,26 | 0,599430082 | -0,57 | 0,234246727 | -0,11 | 0,900126162 |
| 4833438C02Rik | -0,03 | 0,972682121 | -0,19 | 0,74583457  | 0,08  | 0,932577939 | -0,06 | 0,943143586 | -0,05 | 0,973428839 |
| 4833439L19Rik | -0,09 | 0,84900712  | -0,09 | 0,854940418 | 0,33  | 0,625578952 | -0,05 | 0,901395825 | -0,11 | 0,865258929 |
| 4921501E09Rik | 0,01  | 0,98701986  | -0,13 | 0,902965381 | -0,11 | 0,876684089 | -0,15 | 0,743170266 | -0,35 | 0,566999867 |
| 4921504A21Rik | 0,06  | 0,931445059 | -0,03 | 0,949201983 | 0,1   | 0,877115707 | -0,67 | 0,562134102 | -0,66 | 0,495872282 |
| 4921504E06Rik | -0,07 | 0,928103232 | 0,39  | 0,389996405 | 0,08  | 0,909371204 | -0,1  | 0,845813504 | 0,35  | 0,569237041 |
| 4921507G05Rik | 0,41  | 0,239022235 | -0,14 | 0,786394409 | -0,14 | 0,836650725 | 0,17  | 0,656052937 | -0,13 | 0,849001489 |
| 4921507P07Rik | 0,6   | 0,327798253 | 0,14  | 0,937377463 | -0,13 | 0,891208206 | -0,94 | 0,217476034 | 0,94  | 0,083452514 |
| 4921508D12Rik | 0,22  | 0,600313897 | -0,31 | 0,540928505 | -0,15 | 0,777810365 | 0,17  | 0,805452009 | -0,02 | 0,980932608 |
| 4921508M14Rik | 0,17  | 0,795113863 | 0,06  | 0,892869412 | 0,02  | 0,979791644 | 0,17  | 0,586887461 | 0,23  | 0,783490449 |
| 4921509A06Rik | 0,28  | 0,65525391  | -0,16 | 0,732834316 | -0,09 | 0,914134206 | 0,12  | 0,846112956 | 0,14  | 0,881968395 |
| 4921509C19Rik | 0,52  | 0,460231397 | 0,3   | 0,807463629 | 0,5   | 0,501058575 | -0,13 | 0,861140391 | -0,23 | 0,835833283 |
| 4921509O07Rik | -0,09 | 0,902619571 | -0,07 | 0,970020205 | -0,43 | 0,475690033 | -0,26 | 0,846461609 | -0,44 | 0,674408371 |
| 4921511C10Rik | 0,23  | 0,597297093 | -0,13 | 0,87462784  | -0,01 | 0,993716437 | 0,15  | 0,83373219  | -0,19 | 0,758052028 |
| 4921511C20Rik | 0,1   | 0,88090997  | 0,11  | 0,829839151 | 0,03  | 0,970969012 | -0,11 | 0,771144265 | -0,07 | 0,927536545 |
| 4921511H03Rik | 0,19  | 0,832696131 | 0,13  | 0,882847123 | -0,1  | 0,90345282  | -0,25 | 0,747854799 | -0,24 | 0,824727805 |
| 4921511I17Rik | 0,14  | 0,772859736 | 0,05  | 0,940507154 | -0,32 | 0,463843173 | 0,1   | 0,90529096  | -0,32 | 0,608072805 |
| 4921513H07Rik | -0,14 | 0,747663533 | 0,03  | 0,945143056 | -0,01 | 0,990836784 | -0,08 | 0,838270726 | 0     | 0,99981982  |
| 4921513I03Rik | 0,02  | 0,972667767 | 0,26  | 0,615288453 | -0,32 | 0,446493846 | 0     | 1           | 0,01  | 0,992607235 |
| 4921514A10Rik | -0,05 | 0,933689638 | -0,03 | 0,9554581   | 0,23  | 0,661747229 | 0,16  | 0,669350316 | -0,04 | 0,960974478 |
| 4921515E04Rik | 0     | 0,997266885 | 0,07  | 0,902847035 | -0,08 | 0,914354795 | -0,19 | 0,683774467 | -0,11 | 0,903639913 |
| 4921517D16Rik | -0,1  | 0,85335611  | 0,13  | 0,74287552  | -0,13 | 0,821984166 | -0,09 | 0,837304726 | -0,13 | 0,872431573 |
| 4921517D22Rik | -0,16 | 0,835016158 | 0,47  | 0,377007015 | -0,03 | 0,987007223 | -0,48 | 0,546183688 | -0,29 | 0,844265172 |
| 4921518K17Rik | -0,29 | 0,751456663 | 0,09  | 0,926157704 | -0,41 | 0,471873683 | 0,01  | 0,991001566 | 0,1   | 0,922921816 |
| 4921522P10Rik | 0     | 0,998027251 | -0,17 | 0,750160982 | -0,13 | 0,841563482 | 0,18  | 0,786015622 | 0,23  | 0,755677288 |
| 4921524J17Rik | 0,16  | 0,758094656 | 0,38  | 0,690169085 | -0,23 | 0,816081776 | 0,14  | 0,876758879 | -0,17 | 0,879072575 |
| 4921524L21Rik | 0,41  | 0,619165619 | 1,01  | 0,100428178 | -0,23 | 0,823890116 | -0,29 | 0,504754586 | 0,22  | 0,688557987 |
| 4921525O09Rik | 0,34  | 0,64625581  | 0,02  | 0,984812702 | -0,82 | 0,194619745 | -0,28 | 0,597350222 | -0,28 | 0,730951829 |
| 4921528I07Rik | -0,31 | 0,785012364 | 0,48  | 0,750160982 | -0,55 | 0,547368463 | -0,71 | 0,270790452 | 0,13  | 0,895304656 |
| 4921530L21Rik | 0,13  | 0,841140165 | -0,11 | 0,804868131 | -0,22 | 0,652745075 | 0,13  | 0,817162214 | -0,02 | 0,984632256 |
| 4921531C22Rik | -0,16 | 0,785491059 | -0,07 | 0,928036933 | -0,55 | 0,505038995 | -0,28 | 0,508104523 | 0,3   | 0,643580968 |
| 4921531P14Rik | -0,03 | 0,963614875 | 0,08  | 0,88928164  | 0,12  | 0,868609956 | -0,07 | 0,895892607 | -0,12 | 0,866693394 |
| 4921533I20Rik | 0,01  | 0,988846353 | 0,04  | 0,942250059 | 0,13  | 0,866309246 | -0,15 | 0,752301508 | -0,26 | 0,783490449 |
| 4921534H16Rik | 0,05  | 0,95290436  | 0,21  | 0,708684603 | -0,03 | 0,975055092 | -0,26 | 0,525409031 | -0,15 | 0,825311688 |

|               |       |             |       |             |       |             |       |             |       |             |
|---------------|-------|-------------|-------|-------------|-------|-------------|-------|-------------|-------|-------------|
| 4921536K21Rik | -0,09 | 0,875046718 | -0,93 | 0,408909651 | -0,07 | 0,952104131 | 0,25  | 0,77073646  | -0,16 | 0,924972484 |
| 4921539E11Rik | 0,34  | 0,577809864 | 0,03  | 0,965147491 | -0,09 | 0,887741841 | -0,12 | 0,768796094 | 0,06  | 0,937446198 |
| 4922502B01Rik | 0,25  | 0,648571601 | 0,04  | 0,972336944 | -0,07 | 0,917508513 | -0,09 | 0,829589733 | 0,25  | 0,638349312 |
| 4922502D21Rik | -0,09 | 0,911714617 | -0,31 | 0,561562373 | 0,09  | 0,930645703 | 0,19  | 0,71158821  | 0,3   | 0,66875229  |
| 4922502H24Rik | 0,09  | 0,926316023 | 0,08  | 0,909329669 | -0,26 | 0,709317317 | -0,75 | 0,132238421 | 0,04  | 0,963903981 |
| 4922502N22Rik | 0,34  | 0,621995081 | -0,08 | 0,926157704 | -0,11 | 0,836633803 | 0,07  | 0,908650462 | 0,1   | 0,92741476  |
| 4930401C15Rik | 0,02  | 0,966775766 | -0,01 | 0,992383215 | -0,12 | 0,864151343 | 0,3   | 0,4272539   | 0,25  | 0,669861917 |
| 4930401G09Rik | 0,11  | 0,858977038 | 0,1   | 0,867613043 | -0,09 | 0,882540073 | 0,04  | 0,922246542 | 0,13  | 0,840952901 |
| 4930401O10Rik | 0,15  | 0,821721324 | 0,19  | 0,77667467  | -0,01 | 0,996397104 | 0,55  | 0,21936569  | 0,04  | 0,977967676 |
| 4930401O12Rik | 0,15  | 0,782823969 | 0,16  | 0,753410517 | 0,06  | 0,939921221 | -0,15 | 0,657542921 | 0,22  | 0,707081609 |
| 4930402F06Rik | 0,21  | 0,742823915 | -0,1  | 0,832655657 | 0,15  | 0,827697368 | -0,59 | 0,412205005 | -0,43 | 0,720432404 |
| 4930402F11Rik | 0,21  | 0,689253784 | -0,09 | 0,864363741 | 0,12  | 0,888717425 | -0,18 | 0,77370302  | 0,11  | 0,91314596  |
| 4930402H24Rik | -0,23 | 0,717407143 | -0,34 | 0,538642201 | 0,32  | 0,753863135 | 0,5   | 0,519312395 | -0,04 | 0,976743304 |
| 4930402I19Rik | -0,15 | 0,898024085 | 0,31  | 0,825210924 | -0,34 | 0,552970779 | -0,18 | 0,8914104   | -0,21 | 0,850611225 |
| 4930402K13Rik | 0,07  | 0,902619571 | -0,16 | 0,817110093 | -0,23 | 0,667178291 | 0,01  | 0,992183086 | 0,13  | 0,860591136 |
| 4930403D09Rik | 0,03  | 0,949833417 | 0,02  | 0,986782918 | 0,08  | 0,909975745 | 0,21  | 0,598657551 | -0,04 | 0,971098748 |
| 4930403O15Rik | 0,11  | 0,877849931 | -0,24 | 0,644818618 | -0,59 | 0,13589176  | -0,61 | 0,296322125 | -0,27 | 0,807816401 |
| 4930404A05Rik | 0,24  | 0,684674757 | -0,1  | 0,909975293 | -0,09 | 0,902672106 | -0,13 | 0,823045201 | 0,08  | 0,924431292 |
| 4930404H11Rik | 0,04  | 0,942596004 | 0,06  | 0,916176914 | -0,38 | 0,399585442 | -0,01 | 0,98922569  | 0,06  | 0,949544475 |
| 4930404H24Rik | 0,31  | 0,464939452 | -0,17 | 0,817367084 | -0,22 | 0,79007666  | 0,2   | 0,734501094 | 0,44  | 0,530072156 |
| 4930404I05Rik | -0,26 | 0,576339674 | -0,3  | 0,714236324 | -0,11 | 0,899609928 | 0,18  | 0,692059018 | -0,27 | 0,720312918 |
| 4930404N11Rik | 0,2   | 0,735596307 | 0,07  | 0,88483892  | -0,14 | 0,845993227 | 0,07  | 0,87811903  | -0,11 | 0,868583076 |
| 4930405A10Rik | -0,03 | 0,955200574 | -0,19 | 0,626671465 | -0,09 | 0,889881053 | 0,09  | 0,865829889 | 0,2   | 0,718299139 |
| 4930405A21Rik | 0,61  | 0,189684245 | -0,03 | 0,982786635 | 0,03  | 0,974100764 | -0,64 | 0,493583818 | -0,15 | 0,89288875  |
| 4930405D11Rik | -0,09 | 0,932531737 | 0,27  | 0,631908313 | -0,13 | 0,866988945 | -0,32 | 0,582827953 | -0,31 | 0,738260196 |
| 4930405H06Rik | 0,15  | 0,742823915 | 0,01  | 0,996259587 | -0,21 | 0,654328013 | 0,21  | 0,564749161 | 0,43  | 0,423057196 |
| 4930405J17Rik | 0,38  | 0,485159825 | -0,09 | 0,83443949  | -0,01 | 0,990836784 | 0,16  | 0,707060319 | 0,05  | 0,967314981 |
| 4930406D18Rik | -0,1  | 0,87510428  | -0,38 | 0,317962714 | 0,24  | 0,760075811 | 0,1   | 0,807101657 | 0,24  | 0,738853855 |
| 4930407G08Rik | 0,2   | 0,724736278 | -0,18 | 0,856371788 | 0,07  | 0,921956183 | 0,16  | 0,724713448 | 0,37  | 0,573405587 |
| 4930407I10Rik | 0     | 0,998769353 | -0,2  | 0,842663656 | 0,33  | 0,771789829 | 0,23  | 0,452631406 | -0,06 | 0,947257087 |
| 4930408O17Rik | -0,07 | 0,919567534 | 0,49  | 0,551072171 | -0,08 | 0,915096866 | 0,34  | 0,635482645 | 0,32  | 0,765002083 |
| 4930412B13Rik | 0,19  | 0,850851423 | 0,13  | 0,888679468 | 0,1   | 0,911921787 | -0,05 | 0,93866369  | 0,16  | 0,876418697 |
| 4930412C18Rik | 0,04  | 0,963329626 | -0,25 | 0,867324954 | -0,02 | 0,993280531 | 0,04  | 0,955666315 | 0,49  | 0,456564217 |
| 4930412F09Rik | 0,18  | 0,803059866 | 0,09  | 0,938711163 | -0,01 | 0,991568687 | 0,07  | 0,910986771 | 0,05  | 0,960974478 |
| 4930412F12Rik | 0,12  | 0,816710776 | -0,02 | 0,965147491 | -0,12 | 0,831266864 | -0,12 | 0,793134304 | -0,08 | 0,922921816 |

|               |       |             |       |             |       |             |       |             |       |             |
|---------------|-------|-------------|-------|-------------|-------|-------------|-------|-------------|-------|-------------|
| 4930412L05Rik | 0,33  | 0,619472973 | 0,06  | 0,926157704 | -0,23 | 0,770526999 | 0,28  | 0,440023857 | 0,04  | 0,960974478 |
| 4930412M03Rik | 0,25  | 0,493770513 | 0,11  | 0,864363741 | -0,12 | 0,887630371 | -0,24 | 0,632939682 | 0     | 0,999303691 |
| 4930412O13Rik | 0,42  | 0,527110616 | 0,03  | 0,964894023 | -0,78 | 0,242013904 | 0,17  | 0,763720205 | -0,24 | 0,718299139 |
| 4930413E15Rik | -0,05 | 0,936029756 | 0,18  | 0,866523301 | -0,01 | 0,991168026 | -0,22 | 0,67892809  | 0,67  | 0,363675571 |
| 4930413F20Rik | -0,15 | 0,739191661 | 0,48  | 0,44688209  | -0,06 | 0,929272323 | -0,11 | 0,833964527 | -0,06 | 0,941487908 |
| 4930413G21Rik | -0,08 | 0,865055523 | -0,14 | 0,798458472 | -0,46 | 0,246581083 | 0,12  | 0,818849811 | 0,48  | 0,517659304 |
| 4930413M19Rik | -0,12 | 0,84241758  | 0,2   | 0,791442364 | -0,14 | 0,830336321 | 0     | 0,997598211 | 0,06  | 0,948335766 |
| 4930414N06Rik | 0,09  | 0,848664927 | -0,04 | 0,97875059  | -0,07 | 0,921956183 | 0,12  | 0,89741409  | 0,21  | 0,841160223 |
| 4930415F15Rik | -0,5  | 0,156998083 | 0,55  | 0,615311543 | -0,14 | 0,894018349 | -0,08 | 0,932315462 | 0,31  | 0,858314976 |
| 4930415L06Rik | -0,26 | 0,526237328 | 0,47  | 0,74760299  | -0,55 | 0,303590987 | -0,1  | 0,920929266 | 0,1   | 0,899196564 |
| 4930415O20Rik | 0,09  | 0,939858259 | -0,1  | 0,935041212 | -0,63 | 0,462643491 | 0,24  | 0,838806433 | 0,59  | 0,598963515 |
| 4930417H01Rik | 1,09  | 0,124239016 | -0,05 | 0,977107705 | 0,09  | 0,938322304 | 0,06  | 0,953429272 | 0,06  | 0,961130067 |
| 4930417O13Rik | 0,24  | 0,757032046 | -0,49 | 0,622161495 | -0,24 | 0,715166059 | 0,63  | 0,268275619 | 0,34  | 0,566248044 |
| 4930417O22Rik | 0,68  | 0,302609278 | -0,07 | 0,919602924 | -0,15 | 0,856046789 | -0,11 | 0,855218474 | -0,09 | 0,939448119 |
| 4930419G24Rik | 0,1   | 0,905179176 | -0,07 | 0,875768275 | -0,07 | 0,921956183 | -0,03 | 0,958589414 | 0,05  | 0,948911009 |
| 4930420G21Rik | 0,28  | 0,557114011 | 0,21  | 0,732044571 | 0,13  | 0,8290371   | -0,13 | 0,76291338  | -0,08 | 0,920312156 |
| 4930421P07Rik | 0     | 0,998769353 | -0,07 | 0,873628464 | -0,02 | 0,982305856 | 0,14  | 0,690709163 | -0,07 | 0,921263496 |
| 4930423M02Rik | 0,29  | 0,541618134 | 0,01  | 0,998766432 | 0,17  | 0,79007666  | 0,06  | 0,926006808 | 0,37  | 0,567199217 |
| 4930423O20Rik | 0,01  | 0,988431763 | -0,07 | 0,879427032 | 0     | 0,998779926 | -0,04 | 0,935764294 | 0,09  | 0,919558406 |
| 4930425F17Rik | 0,12  | 0,848780666 | 0,01  | 0,994730653 | -0,11 | 0,830639813 | 0,01  | 0,978056041 | 0,08  | 0,918797466 |
| 4930425K10Rik | 0,43  | 0,53686867  | -0,12 | 0,851830452 | -0,25 | 0,697890099 | -0,17 | 0,787615739 | -0,12 | 0,915395762 |
| 4930425O10Rik | -0,2  | 0,754029145 | -0,05 | 0,944438314 | 0,14  | 0,800493831 | -0,05 | 0,937079845 | -0,2  | 0,75509516  |
| 4930426I24Rik | -0,21 | 0,74672311  | -0,11 | 0,8697832   | -0,19 | 0,876684089 | -0,42 | 0,4430986   | -0,34 | 0,84701421  |
| 4930426L09Rik | 0,18  | 0,801665973 | -0,15 | 0,787758076 | 0,15  | 0,798711591 | -0,62 | 0,29786927  | -0,24 | 0,798808741 |
| 4930427A07Rik | -0,78 | 0,154960518 | -0,78 | 0,2862434   | 0,29  | 0,714346477 | 0,63  | 0,238841966 | 0,22  | 0,792343964 |
| 4930428E07Rik | -0,04 | 0,944969851 | 0,02  | 0,989873399 | -0,22 | 0,683975246 | -0,07 | 0,891773132 | 0,22  | 0,673120647 |
| 4930428G15Rik | 0,02  | 0,989349635 | -0,35 | 0,804868131 | 0,55  | 0,813983152 | 0,5   | 0,593856968 | -0,35 | 0,711387654 |
| 4930428N03Rik | -0,14 | 0,848837214 | -0,08 | 0,952529598 | 0,03  | 0,969269701 | 0,19  | 0,678934155 | 0,06  | 0,975986697 |
| 4930428O21Rik | 0,35  | 0,64621704  | -0,15 | 0,823736554 | 0,04  | 0,959650277 | -0,53 | 0,144210353 | -0,23 | 0,666434112 |
| 4930429B21Rik | -0,49 | 0,689253784 | -0,13 | 0,88741189  | 0,13  | 0,871603067 | -0,16 | 0,847641912 | -0,45 | 0,586118577 |
| 4930429D17Rik | -0,4  | 0,494649125 | -0,2  | 0,62733885  | 0,16  | 0,876199546 | -0,05 | 0,945619692 | 0,06  | 0,97683359  |
| 4930429F11Rik | 0,4   | 0,301896345 | 0,05  | 0,934480412 | -0,25 | 0,625745801 | -0,08 | 0,854764036 | 0,25  | 0,734230208 |
| 4930429F24Rik | -0,28 | 0,597519827 | -0,12 | 0,814467082 | -0,25 | 0,773646012 | -0,11 | 0,797527363 | 0,12  | 0,871015717 |
| 4930430A15Rik | -0,09 | 0,87350924  | -0,42 | 0,463318914 | -0,14 | 0,843091338 | 0,4   | 0,357560472 | 0,39  | 0,576909127 |
| 4930430E12Rik | 0,16  | 0,820023436 | 0,23  | 0,602956592 | -0,4  | 0,531403203 | -0,2  | 0,763593883 | -0,25 | 0,86809582  |

|               |       |             |       |             |       |             |       |             |       |             |
|---------------|-------|-------------|-------|-------------|-------|-------------|-------|-------------|-------|-------------|
| 4930430F08Rik | -1,23 | 0,059686542 | 0,47  | 0,531152378 | -0,02 | 0,993280531 | 0,33  | 0,692059018 | -0,12 | 0,920355527 |
| 4930430F21Rik | 0,1   | 0,825701426 | 0,1   | 0,921800269 | 0,09  | 0,877325054 | -0,14 | 0,671346789 | 0,05  | 0,950151148 |
| 4930430J02Rik | 0,18  | 0,841134954 | -0,07 | 0,897732014 | -0,02 | 0,985326269 | 0,26  | 0,461412838 | 0,2   | 0,824818547 |
| 4930430M16Rik | -0,28 | 0,517419496 | -0,17 | 0,792112243 | -0,3  | 0,588460338 | 0,13  | 0,899335603 | -0,03 | 0,978325984 |
| 4930430O22Rik | -0,11 | 0,798561927 | -0,08 | 0,882589938 | -0,09 | 0,894239558 | 0,15  | 0,729782299 | -0,06 | 0,948902333 |
| 4930431F12Rik | -0,03 | 0,972950186 | 0,08  | 0,859917649 | -0,33 | 0,574962107 | 0,43  | 0,332781724 | -0,15 | 0,861977667 |
| 4930431P03Rik | 0,63  | 0,409977631 | 0,55  | 0,609977513 | -0,6  | 0,444017304 | -0,01 | 0,991001566 | 0,31  | 0,693449612 |
| 4930432B10Rik | 0,1   | 0,963738499 | 0,21  | 0,769052742 | 0,31  | 0,80546411  | -0,18 | 0,748470342 | 0,2   | 0,830932154 |
| 4930432J09Rik | 0,28  | 0,703606438 | 0,12  | 0,900801202 | -0,01 | 0,994130625 | -1,33 | 0,452631406 | -1,12 | 0,462513936 |
| 4930432K21Rik | -0,62 | 0,194613044 | 0,19  | 0,872187376 | 0,39  | 0,391889599 | -0,67 | 0,070668962 | -0,2  | 0,832818376 |
| 4930432L08Rik | 0,05  | 0,960720096 | 0,1   | 0,953355735 | -0,05 | 0,953456022 | 0,04  | 0,95852873  | 0,05  | 0,955836352 |
| 4930432M17Rik | 0,18  | 0,751568489 | -0,14 | 0,866523301 | -0,11 | 0,838289412 | 0,12  | 0,728067633 | 0,3   | 0,555509871 |
| 4930433B08Rik | -0,06 | 0,93370499  | -0,06 | 0,927205716 | 0,02  | 0,976752996 | -0,13 | 0,737615978 | 0,01  | 0,991437885 |
| 4930433N12Rik | -0,25 | 0,832696131 | -0,97 | 0,712696597 | -0,14 | 0,866141679 | 0,12  | 0,92289757  | 0,04  | 0,979338129 |
| 4930434J06Rik | 0,45  | 0,583196213 | -0,33 | 0,611052267 | -0,2  | 0,804607903 | 0,24  | 0,574496617 | -0,11 | 0,89529118  |
| 4930435E12Rik | 0,17  | 0,762984952 | 0,1   | 0,95429671  | 0,17  | 0,823823322 | 0,18  | 0,890793693 | -0,39 | 0,750470312 |
| 4930438A08Rik | 0,51  | 0,481677041 | -0,13 | 0,836620305 | 0,03  | 0,981207238 | 0,25  | 0,648154714 | 0,04  | 0,974447247 |
| 4930438E09Rik | 0,29  | 0,756145616 | -0,12 | 0,831404974 | -0,16 | 0,791504463 | -0,15 | 0,783528833 | -0,42 | 0,637294627 |
| 4930439A04Rik | 0,22  | 0,687662951 | 0,84  | 0,419795665 | 0,01  | 0,991240121 | -0,4  | 0,476999373 | 0,28  | 0,675282484 |
| 4930440C22Rik | 0,29  | 0,60348583  | 0,25  | 0,575260771 | -0,11 | 0,868409802 | -0,08 | 0,85301747  | 0,04  | 0,958778604 |
| 4930440I19Rik | 0,2   | 0,751534367 | 0,28  | 0,75824583  | 0,02  | 0,979791644 | 0,38  | 0,598756532 | 0,25  | 0,728388857 |
| 4930441J16Rik | 0,41  | 0,422033372 | -0,43 | 0,677026666 | 0,19  | 0,838289412 | 0,26  | 0,810252407 | -0,02 | 0,987527273 |
| 4930442H23Rik | 0,4   | 0,568479459 | -0,01 | 0,996105203 | -0,43 | 0,313065218 | -0,19 | 0,646776742 | -0,57 | 0,207567334 |
| 4930442L01Rik | -0,08 | 0,875555348 | 0     | 0,999677133 | 0,08  | 0,932577939 | 0,01  | 0,986287953 | -0,15 | 0,830086988 |
| 4930443O20Rik | -0,15 | 0,795286609 | -0,06 | 0,928134372 | 0,24  | 0,698004823 | 0,04  | 0,933715908 | -0,01 | 0,985816839 |
| 4930444E06Rik | -0,05 | 0,925737471 | 0,1   | 0,828219939 | -0,19 | 0,684455958 | -0,04 | 0,924303497 | -0,05 | 0,951429597 |
| 4930444F02Rik | 0,07  | 0,943576038 | -0,37 | 0,729741948 | -0,19 | 0,793934609 | 0,25  | 0,755234779 | 0,18  | 0,864004866 |
| 4930444G20Rik | -0,08 | 0,937369106 | -0,26 | 0,628971    | -0,28 | 0,654328013 | 0,17  | 0,768880868 | 0,03  | 0,977903513 |
| 4930444M15Rik | 0,08  | 0,890184407 | 0,39  | 0,438764825 | 0,08  | 0,926091985 | -0,27 | 0,640879926 | 0,01  | 0,992406971 |
| 4930444P10Rik | -0,02 | 0,987965359 | 0,05  | 0,978528738 | 0,13  | 0,900068203 | 0,23  | 0,753242411 | 0,61  | 0,332695011 |
| 4930445B16Rik | -0,1  | 0,878941099 | -0,19 | 0,703923817 | -0,21 | 0,745313546 | 0,02  | 0,974206181 | -0,01 | 0,994774512 |
| 4930445N08Rik | 0,17  | 0,735860437 | 0,08  | 0,888318748 | -0,22 | 0,685933617 | 0,09  | 0,830816671 | -0,03 | 0,97425848  |
| 4930445N18Rik | 0,37  | 0,441176207 | -0,21 | 0,719093262 | -0,08 | 0,944468902 | 0,35  | 0,30750518  | 0,32  | 0,587440076 |
| 4930447A16Rik | 0,22  | 0,638590242 | -0,35 | 0,644516897 | 0     | 0,997268369 | -0,14 | 0,718299331 | -0,03 | 0,976743304 |
| 4930447C04Rik | -0,18 | 0,815219917 | 0,44  | 0,565603216 | -0,13 | 0,823823322 | -0,06 | 0,87811903  | 0,17  | 0,80222716  |



|               |       |             |       |             |       |             |       |             |       |             |
|---------------|-------|-------------|-------|-------------|-------|-------------|-------|-------------|-------|-------------|
| 4930447F04Rik | 0,09  | 0,865776054 | 0,22  | 0,618450333 | -0,07 | 0,930910609 | -0,07 | 0,88017942  | 0,09  | 0,9039404   |
| 4930447J18Rik | 0,16  | 0,832940722 | -0,22 | 0,697863432 | 0,1   | 0,88306802  | -0,02 | 0,983166423 | -0,14 | 0,910507369 |
| 4930447K03Rik | 0,43  | 0,558017944 | 0,01  | 1           | 1,17  | 0,124912754 | 0,06  | 0,975687196 | -0,06 | 0,95587699  |
| 4930447M23Rik | 0,04  | 0,963914207 | 0,35  | 0,486945738 | -0,12 | 0,878636183 | -0,19 | 0,748723514 | 0     | 0,995841966 |
| 4930447N08Rik | 0,03  | 0,970154743 | -0,28 | 0,56209327  | -0,33 | 0,674253263 | 0,3   | 0,412187247 | 0,02  | 0,989300476 |
| 4930448C13Rik | 0,09  | 0,858269816 | 0,26  | 0,697354745 | -0,17 | 0,822325505 | -0,1  | 0,876545851 | 0,16  | 0,871038748 |
| 4930448D08Rik | 0,1   | 0,825389612 | -0,04 | 0,928780248 | -0,24 | 0,653835785 | 0,09  | 0,820706211 | 0,08  | 0,916173996 |
| 4930448F12Rik | 0,22  | 0,761457464 | -0,17 | 0,69917278  | -0,23 | 0,638965268 | 0,27  | 0,554518175 | 0,05  | 0,960065122 |
| 4930448H16Rik | 0,06  | 0,921115842 | 0,25  | 0,538971484 | -0,27 | 0,712697139 | -0,21 | 0,637798711 | 0,05  | 0,950308536 |
| 4930448I06Rik | 0,04  | 0,956334715 | 0,09  | 0,862088357 | -0,21 | 0,660517013 | -0,21 | 0,490447708 | -0,05 | 0,959573673 |
| 4930448I18Rik | 0,04  | 0,976314749 | 0,21  | 0,641804702 | 0,08  | 0,916362962 | 0,11  | 0,774181256 | 0,1   | 0,91339829  |
| 4930448K20Rik | -0,09 | 0,90693652  | -0,04 | 0,941572153 | -0,28 | 0,501664412 | -0,13 | 0,778817721 | -0,15 | 0,830415283 |
| 4930448N21Rik | 0,14  | 0,768310499 | 0,2   | 0,82485467  | 0,03  | 0,981848891 | -0,05 | 0,923403061 | -0,23 | 0,728388857 |
| 4930449A18Rik | 0,37  | 0,520609641 | 0,01  | 0,997700959 | 0,31  | 0,556463781 | 0,07  | 0,907662772 | 0,24  | 0,795033998 |
| 4930449C09Rik | -0,03 | 0,959985598 | 0,03  | 0,965413567 | -0,08 | 0,895434884 | 0,05  | 0,924553446 | -0,07 | 0,925623537 |
| 4930449E01Rik | 0,23  | 0,687662951 | 0,16  | 0,854940418 | -0,08 | 0,914965671 | 0,05  | 0,944051993 | -0,17 | 0,836697963 |
| 4930449E18Rik | 0,36  | 0,488619512 | 0,19  | 0,785153081 | 0,11  | 0,944078985 | -0,25 | 0,804185549 | -0,25 | 0,848679763 |
| 4930451E10Rik | 0,43  | 0,594901042 | -0,2  | 0,748874675 | 0,29  | 0,558415544 | -0,05 | 0,902706786 | -0,09 | 0,951429597 |
| 4930451G09Rik | 0,02  | 0,976574175 | 0,09  | 0,889215021 | 0,11  | 0,864411302 | 0     | 1           | 0,07  | 0,932621093 |
| 4930451I11Rik | 0,07  | 0,919567534 | -0,09 | 0,888318748 | -0,1  | 0,901410016 | -0,02 | 0,979516321 | 0,02  | 0,984125319 |
| 4930452A19Rik | -0,21 | 0,618752114 | 0,19  | 0,915570447 | -0,08 | 0,924196538 | -0,26 | 0,397551382 | -0,29 | 0,583952152 |
| 4930452B06Rik | -0,56 | 0,438315603 | -0,24 | 0,921610565 | 0,64  | 0,283649705 | 0,55  | 0,644043374 | -0,31 | 0,794054354 |
| 4930452G13Rik | 0,06  | 0,89763852  | -0,4  | 0,441593532 | -0,09 | 0,887446966 | 0,16  | 0,77267305  | -0,24 | 0,760657649 |
| 4930452N14Rik | 0,07  | 0,919567534 | -0,2  | 0,731603396 | 0,12  | 0,835492222 | 0,03  | 0,970931237 | -0,43 | 0,549452244 |
| 4930453H23Rik | 0,14  | 0,874136558 | 0,19  | 0,912535732 | -0,5  | 0,33015201  | -0,02 | 0,976503337 | 0,08  | 0,914176188 |
| 4930453N24Rik | -0,33 | 0,55158132  | 0,21  | 0,875220537 | 0,02  | 0,987896358 | 0,02  | 0,982534991 | 0,23  | 0,795612563 |
| 4930453O03Rik | -0,29 | 0,630387279 | 0,5   | 0,385387329 | 0,38  | 0,415701757 | -0,17 | 0,893841279 | -0,17 | 0,904830156 |
| 4930455B14Rik | 0,15  | 0,840218728 | 0,3   | 0,461427698 | -0,37 | 0,412103362 | -0,24 | 0,644604394 | 0,09  | 0,932268703 |
| 4930455C13Rik | 0,1   | 0,895031891 | -0,05 | 0,937424389 | -0,16 | 0,834406595 | 0     | 0,999943958 | 0,01  | 0,988516531 |
| 4930455D15Rik | 0,06  | 0,926962211 | 0,59  | 0,561562373 | 0,2   | 0,871176083 | -0,24 | 0,865727381 | -0,09 | 0,947437555 |
| 4930455F16Rik | 0,94  | 0,091826925 | -0,29 | 0,494858163 | 0     | 0,999931921 | 0,04  | 0,943143586 | -0,03 | 0,981439632 |
| 4930455G09Rik | 0,04  | 0,966775766 | 0,06  | 0,889183282 | 0,39  | 0,602259493 | -0,41 | 0,397216038 | -0,49 | 0,387633714 |
| 4930455H04Rik | 0,26  | 0,672753295 | 0,32  | 0,695689103 | 0,03  | 0,978554254 | 0,29  | 0,367104963 | 0,1   | 0,939448119 |
| 4930455J16Rik | 0,02  | 0,975402839 | -0,35 | 0,589994463 | -0,26 | 0,775964228 | 0,19  | 0,62296101  | -0,22 | 0,814438115 |
| 4930456L15Rik | 0,18  | 0,757251078 | -0,11 | 0,946885634 | -0,11 | 0,904239687 | 0,4   | 0,24980285  | -0,05 | 0,953297732 |

|               |       |             |       |             |       |             |       |             |       |             |
|---------------|-------|-------------|-------|-------------|-------|-------------|-------|-------------|-------|-------------|
| 4930458D05Rik | 0,09  | 0,840882072 | 0,25  | 0,568822223 | 0,25  | 0,772008734 | -0,38 | 0,324591518 | -0,25 | 0,666547591 |
| 4930459I23Rik | 0,1   | 0,84241758  | 0,09  | 0,896187678 | -0,22 | 0,68573346  | -0,05 | 0,94180692  | -0,12 | 0,860469017 |
| 4930459L07Rik | 0,07  | 0,898086998 | 0,3   | 0,606272752 | 0,04  | 0,958077939 | -0,21 | 0,57372642  | -0,31 | 0,586214748 |
| 4930461C15Rik | 0     | 0,998210173 | 0,25  | 0,599008089 | -0,04 | 0,959650277 | -0,06 | 0,8914104   | -0,02 | 0,979456872 |
| 4930461G14Rik | 0,24  | 0,74140155  | -0,43 | 0,268436493 | 1,27  | 0,300310474 | -0,01 | 0,994761295 | -0,04 | 0,979392852 |
| 4930463O16Rik | -0,01 | 0,988509744 | -0,05 | 0,935329426 | -0,06 | 0,94550347  | 0,03  | 0,971151107 | 0,17  | 0,861977667 |
| 4930465K10Rik | -0,02 | 0,974144325 | 0,15  | 0,800636573 | -0,19 | 0,713620433 | -0,14 | 0,796130334 | 0,25  | 0,745134899 |
| 4930465M20Rik | -0,23 | 0,539953121 | 0,06  | 0,912900791 | -0,2  | 0,771729329 | 0,09  | 0,879527088 | -0,23 | 0,765419939 |
| 4930466F19Rik | 0,2   | 0,637135317 | -0,01 | 0,984812702 | -0,08 | 0,922318683 | -0,13 | 0,706937999 | 0,04  | 0,961642558 |
| 4930466I24Rik | -0,43 | 0,214139353 | -0,1  | 0,855394007 | 0,09  | 0,905233024 | 0,06  | 0,915691108 | -0,17 | 0,763240477 |
| 4930467D21Rik | -0,1  | 0,892124736 | 0,15  | 0,827403767 | 0     | 0,997779809 | 0     | 0,996363405 | 0,06  | 0,953297732 |
| 4930467E23Rik | 0,04  | 0,962660554 | -0,13 | 0,871370631 | -0,09 | 0,931899359 | -0,3  | 0,420008152 | -0,46 | 0,416896732 |
| 4930467K11Rik | 0,34  | 0,70137787  | 0,31  | 0,599008089 | -0,5  | 0,270419876 | -0,3  | 0,618453093 | -0,28 | 0,740020498 |
| 4930469G21Rik | -0,01 | 0,98659023  | 0,04  | 0,955891382 | 0,01  | 0,99452103  | -0,01 | 0,985865561 | 0,05  | 0,951646452 |
| 4930469K13Rik | -0,05 | 0,924873476 | 0,32  | 0,775914311 | -0,54 | 0,315962019 | 0,28  | 0,810891431 | -0,27 | 0,831612519 |
| 4930470H14Rik | 0,47  | 0,321300953 | -0,17 | 0,688091301 | 0,2   | 0,743904341 | -0,23 | 0,508963388 | -0,06 | 0,948163009 |
| 4930470P17Rik | 0,06  | 0,946212585 | 0,27  | 0,663197975 | 0,07  | 0,930308787 | 0,04  | 0,961123444 | 0,2   | 0,859686493 |
| 4930471C04Rik | -0,02 | 0,98225675  | -0,11 | 0,904698551 | -0,2  | 0,777918093 | 0,62  | 0,373249226 | 0,07  | 0,961929311 |
| 4930471D02Rik | 0,08  | 0,869565514 | -0,18 | 0,782652703 | 0,06  | 0,949135765 | -0,11 | 0,833964527 | -0,06 | 0,944911045 |
| 4930471G03Rik | -0,03 | 0,946485591 | 0,03  | 0,969296652 | 0,03  | 0,9701931   | -0,08 | 0,847627021 | 0,06  | 0,95150664  |
| 4930471L23Rik | 0,15  | 0,774822327 | -0,58 | 0,538283657 | -0,26 | 0,800142198 | 0,17  | 0,822583643 | -0,6  | 0,565817768 |
| 4930471M09Rik | 0,13  | 0,791150064 | 0,35  | 0,530207532 | -0,2  | 0,823823322 | -0,03 | 0,970768272 | -0,27 | 0,675282484 |
| 4930473A02Rik | 0,28  | 0,627641756 | 0,5   | 0,566337065 | -0,06 | 0,944791988 | -0,6  | 0,282769221 | -0,43 | 0,640333106 |
| 4930473D10Rik | 0,1   | 0,84900712  | -0,01 | 0,991507752 | -0,16 | 0,82162081  | 0,07  | 0,900334233 | -0,16 | 0,811321326 |
| 4930473O22Rik | 0,08  | 0,892141122 | 0,01  | 0,994137877 | -0,17 | 0,800565527 | -0,15 | 0,696843539 | 0,01  | 0,984125319 |
| 4930474G06Rik | 0,62  | 0,470166881 | 0,07  | 0,954710608 | 0,04  | 0,973006385 | -0,24 | 0,726631011 | 0,3   | 0,716859687 |
| 4930474H20Rik | 0     | 1           | 0,11  | 0,818072947 | 0,06  | 0,936852355 | -0,04 | 0,967866794 | 0,04  | 0,974924379 |
| 4930474M22Rik | -0,12 | 0,844968554 | 0,07  | 0,940758747 | -0,28 | 0,754881832 | 0,12  | 0,797914158 | 0,23  | 0,80155635  |
| 4930474N05Rik | -0,12 | 0,878236686 | 0,12  | 0,863359785 | -0,17 | 0,809980205 | -0,17 | 0,813792791 | 0,12  | 0,906031862 |
| 4930474N09Rik | -0,24 | 0,582313604 | -0,05 | 0,952099316 | 0,05  | 0,942666004 | -0,01 | 0,981203009 | -0,03 | 0,974553568 |
| 4930477E14Rik | 0,06  | 0,906885053 | 0     | 0,999661053 | -0,17 | 0,726142253 | 0,03  | 0,957250237 | -0,03 | 0,978604922 |
| 4930478K11Rik | -0,21 | 0,631523843 | 0,04  | 0,96497149  | 0,05  | 0,953292736 | 0,25  | 0,5508774   | -0,1  | 0,884640084 |
| 4930478L05Rik | -0,03 | 0,966775766 | -0,13 | 0,82505545  | -0,21 | 0,733092626 | 0,52  | 0,381877273 | 0,23  | 0,794586838 |
| 4930478P22Rik | 0,38  | 0,287459734 | 0,19  | 0,732847182 | -0,45 | 0,236782648 | 0,06  | 0,917183011 | 0,28  | 0,689647206 |
| 4930479D17Rik | -0,13 | 0,794063226 | 0,04  | 0,965147491 | -0,29 | 0,661860407 | -0,26 | 0,601996277 | 0,02  | 0,985982505 |

|               |       |             |       |             |       |             |       |             |       |             |
|---------------|-------|-------------|-------|-------------|-------|-------------|-------|-------------|-------|-------------|
| 4930480E11Rik | 0,15  | 0,80226019  | 0,03  | 0,974975867 | 0,24  | 0,618711263 | -0,28 | 0,464815834 | 0,09  | 0,905446784 |
| 4930480G23Rik | 0,24  | 0,597080663 | 0,14  | 0,758114521 | -0,35 | 0,547221473 | -0,28 | 0,376165713 | 0,12  | 0,854084773 |
| 4930480K15Rik | 0,12  | 0,793616893 | -0,03 | 0,977107705 | 0     | 0,997268369 | 0,31  | 0,523255995 | 0,19  | 0,76457584  |
| 4930480K23Rik | 0,36  | 0,803410478 | 0,21  | 0,9381453   | -0,79 | 0,340783964 | -0,46 | 0,553357202 | -0,16 | 0,936333982 |
| 4930480M12Rik | 0,2   | 0,718996404 | -0,01 | 0,992929085 | 0,01  | 0,987390039 | -0,34 | 0,521552997 | 0,05  | 0,971193667 |
| 4930481A15Rik | -0,59 | 0,657124524 | 1,03  | 0,336433977 | -0,43 | 0,543696688 | -1,77 | 0,2831039   | -0,49 | 0,8311636   |
| 4930481B07Rik | 0,11  | 0,848780666 | 0,27  | 0,861919761 | -0,02 | 0,985326269 | -0,06 | 0,897576959 | 0,12  | 0,893589566 |
| 4930483J18Rik | -0,13 | 0,7914678   | 0,12  | 0,862088357 | -0,06 | 0,941137337 | 0,16  | 0,654016303 | 0,28  | 0,731527639 |
| 4930483K19Rik | 0,17  | 0,822613889 | -0,21 | 0,784841983 | -0,03 | 0,963775512 | 0,23  | 0,754808755 | 0,3   | 0,666758661 |
| 4930483O08Rik | 0,01  | 0,990168789 | 0,06  | 0,932292974 | -0,23 | 0,721952929 | -0,08 | 0,889890514 | -0,05 | 0,961281513 |
| 4930486F22Rik | 0,28  | 0,683267007 | 0,05  | 0,933943587 | -0,1  | 0,882359468 | -0,18 | 0,71383199  | -0,09 | 0,948163009 |
| 4930486I03Rik | 0,13  | 0,764189777 | 0,22  | 0,627205829 | -0,12 | 0,821229302 | -0,34 | 0,477988362 | 0,16  | 0,835191    |
| 4930486L24Rik | 0,84  | 0,16527332  | -1,02 | 0,15948775  | -0,62 | 0,37686469  | -1,42 | 0,067975729 | 0,3   | 0,729457433 |
| 4930487D11Rik | 0,14  | 0,782889069 | 0,15  | 0,792434694 | -0,21 | 0,709846532 | 0,11  | 0,868743047 | -0,06 | 0,951236192 |
| 4930487H11Rik | 0,21  | 0,888623724 | 0,04  | 0,95830747  | -0,23 | 0,742758388 | -0,3  | 0,531725862 | 0     | 0,999595686 |
| 4930488B22Rik | -0,07 | 0,91614216  | -0,05 | 0,919602924 | -0,25 | 0,68573346  | 0,12  | 0,74136915  | -0,05 | 0,963820292 |
| 4930488L21Rik | 0     | 0,999536558 | 0,05  | 0,928134372 | -0,06 | 0,929042102 | 0,03  | 0,947551542 | -0,15 | 0,80222716  |
| 4930488N24Rik | -0,18 | 0,691942071 | 0,22  | 0,677026666 | -0,06 | 0,947881687 | 0,04  | 0,958889858 | 0,29  | 0,730289864 |
| 4930500F04Rik | 0,48  | 0,369418071 | 0,32  | 0,54867175  | -0,17 | 0,800107725 | -0,1  | 0,864379203 | 0,13  | 0,864373858 |
| 4930500F10Rik | 0,07  | 0,907726087 | 0,12  | 0,786074087 | 0,16  | 0,763233047 | 0,2   | 0,578867273 | 0,36  | 0,471919432 |
| 4930500L23Rik | 0,16  | 0,784951771 | 0,06  | 0,912758263 | -0,23 | 0,666060145 | 0,06  | 0,943143586 | 0,33  | 0,638349312 |
| 4930502A04Rik | -0,02 | 0,984747015 | 0,04  | 0,951375162 | 0,04  | 0,967930981 | -0,21 | 0,662828907 | 0,05  | 0,961233897 |
| 4930502E09Rik | 0,08  | 0,900892804 | 0,14  | 0,840976412 | -0,25 | 0,607641251 | -0,27 | 0,535627157 | -0,04 | 0,954657649 |
| 4930502E18Rik | -0,8  | 0,373844376 | -1,14 | 0,219055424 | 1,48  | 0,237889028 | 4,46  | 0,001901534 | 0,43  | 0,449856486 |
| 4930503B20Rik | 0,53  | 0,609158244 | 0,08  | 0,973945454 | -0,01 | 0,996260936 | 0,06  | 0,964356596 | -0,28 | 0,61355523  |
| 4930503E14Rik | 0,04  | 0,958188047 | -0,15 | 0,885939034 | -0,14 | 0,816749833 | -0,08 | 0,837974367 | -0,16 | 0,791071778 |
| 4930503E24Rik | -0,06 | 0,9116164   | 0,08  | 0,881171171 | -0,36 | 0,389841181 | -0,02 | 0,973848105 | 0,2   | 0,78512653  |
| 4930503H13Rik | 0,19  | 0,676906193 | -0,02 | 0,980518468 | 0,17  | 0,80874731  | 0,33  | 0,270661824 | 0,14  | 0,836715889 |
| 4930503L19Rik | -0,05 | 0,955999577 | 0,46  | 0,562374094 | -0,73 | 0,280580035 | 0,85  | 0,300673159 | 0,87  | 0,288158558 |
| 4930503O07Rik | -0,19 | 0,74672311  | 0,36  | 0,475500358 | 0,03  | 0,979848588 | 0,16  | 0,743170266 | 0,27  | 0,794570285 |
| 4930504O13Rik | -0,21 | 0,600680579 | -0,09 | 0,954378914 | -0,1  | 0,935877713 | 0,08  | 0,92123654  | -0,13 | 0,883592868 |
| 4930505A04Rik | -0,04 | 0,970286316 | 0,03  | 0,95622676  | 0,25  | 0,702928613 | 0,03  | 0,976361058 | -0,02 | 0,984125319 |
| 4930505G20Rik | -0,03 | 0,966775766 | 0,3   | 0,610506494 | -0,34 | 0,574656919 | -0,13 | 0,729786741 | 0,05  | 0,947257087 |
| 4930505K14Rik | 0,14  | 0,810208393 | 0,2   | 0,594415097 | -0,31 | 0,483761569 | -0,2  | 0,695365891 | 0,08  | 0,913978885 |
| 4930505M18Rik | -0,17 | 0,687662951 | 0,09  | 0,852719676 | 0,02  | 0,984879454 | -0,17 | 0,672331878 | -0,29 | 0,650995474 |

|               |       |             |       |             |       |             |       |             |       |             |
|---------------|-------|-------------|-------|-------------|-------|-------------|-------|-------------|-------|-------------|
| 4930505N22Rik | 0,09  | 0,844104386 | 0,1   | 0,83670177  | -0,18 | 0,707447086 | 0,05  | 0,914828446 | -0,02 | 0,982779069 |
| 4930505O20Rik | 0,11  | 0,831548328 | 0,18  | 0,716070721 | -0,21 | 0,721083003 | -0,27 | 0,417204885 | -0,14 | 0,826379382 |
| 4930506C21Rik | 0,07  | 0,931934508 | -0,01 | 0,998513452 | -0,09 | 0,875486206 | 0,15  | 0,709570719 | -0,36 | 0,587735967 |
| 4930507D05Rik | 0,04  | 0,932324918 | -0,14 | 0,768085304 | -0,09 | 0,89906051  | 0,12  | 0,740792457 | 0,1   | 0,91398047  |
| 4930507D10Rik | 0,33  | 0,628835616 | 0,78  | 0,450538273 | 0,12  | 0,90345282  | -0,44 | 0,591978406 | 0,22  | 0,864415219 |
| 4930509E16Rik | 0,35  | 0,580909375 | -0,39 | 0,470112519 | -0,12 | 0,899171797 | 0,23  | 0,808985118 | 0,07  | 0,951429597 |
| 4930509J09Rik | 0,26  | 0,606922012 | -0,03 | 0,963168371 | -0,38 | 0,339425194 | 0,1   | 0,798441226 | 0,04  | 0,966951657 |
| 4930509K18Rik | 0,08  | 0,897077512 | -0,16 | 0,666450149 | -0,18 | 0,742758388 | 0,23  | 0,557596043 | 0,16  | 0,866231214 |
| 4930510E17Rik | -0,32 | 0,545805455 | -0,24 | 0,641792237 | -0,38 | 0,522643974 | 0,23  | 0,56246056  | 0,37  | 0,639785525 |
| 4930511A02Rik | 0     | 0,998027251 | 0,04  | 0,951768918 | -0,01 | 0,991477426 | 0,24  | 0,543292867 | -0,23 | 0,700280961 |
| 4930511E03Rik | -0,14 | 0,886680488 | -0,38 | 0,781665479 | -0,18 | 0,841669036 | 0     | 1           | 0,16  | 0,833124162 |
| 4930511M06Rik | 0,02  | 0,988674093 | -0,18 | 0,785128233 | 0,12  | 0,870263371 | -0,39 | 0,351707132 | -0,13 | 0,900126162 |
| 4930511O05Rik | 0,08  | 0,919779774 | 0,14  | 0,871370631 | -0,11 | 0,951209773 | -0,19 | 0,831135822 | -0,02 | 0,99004065  |
| 4930512B01Rik | 0,01  | 0,992533909 | 0,3   | 0,608664258 | -0,19 | 0,861877024 | -0,23 | 0,677875835 | 0,27  | 0,738266197 |
| 4930512H18Rik | 0,03  | 0,966775766 | 0,08  | 0,880892852 | -0,12 | 0,846868626 | 0,21  | 0,779275245 | -0,26 | 0,808526606 |
| 4930512M02Rik | 0,6   | 0,327334001 | -0,12 | 0,906040916 | 0,42  | 0,498349888 | 0,49  | 0,4066494   | 0,47  | 0,530072156 |
| 4930513D17Rik | 0,12  | 0,850952988 | -0,15 | 0,909658961 | -0,61 | 0,245030155 | -0,05 | 0,962670023 | 0,19  | 0,864415219 |
| 4930513N10Rik | 0,1   | 0,929347036 | -1,15 | 0,146050887 | -0,24 | 0,753966565 | 0,86  | 0,270537099 | -0,28 | 0,830576267 |
| 4930513O06Rik | -0,02 | 0,970154743 | 0,05  | 0,944864292 | -0,18 | 0,715166059 | -0,05 | 0,929835301 | -0,05 | 0,950048707 |
| 4930515B02Rik | 0,11  | 0,892823025 | -0,04 | 0,965276877 | -0,19 | 0,721952929 | 0,19  | 0,723887166 | 0,01  | 0,993293923 |
| 4930515G01Rik | 0,31  | 0,681652607 | -0,34 | 0,492896389 | -0,89 | 0,395373936 | 0,04  | 0,966701307 | -0,3  | 0,694233384 |
| 4930515G16Rik | 0,06  | 0,89546421  | -0,03 | 0,948314657 | -0,07 | 0,924214358 | 0,37  | 0,454948356 | -0,1  | 0,913414593 |
| 4930515L03Rik | 0,2   | 0,694699901 | 0,13  | 0,750555245 | -0,6  | 0,161469949 | -0,06 | 0,92123654  | 0,01  | 0,99004065  |
| 4930515L19Rik | -0,09 | 0,867025523 | 0,13  | 0,791426435 | -0,23 | 0,637321546 | -0,08 | 0,881575533 | -0,15 | 0,835191    |
| 4930516K23Rik | 0,15  | 0,718369124 | 0,04  | 0,942422049 | -0,44 | 0,387573388 | 0,11  | 0,812675438 | -0,04 | 0,974697564 |
| 4930517E11Rik | -0,17 | 0,932354771 | -0,44 | 0,615288453 | 0,12  | 0,810518763 | 0,23  | 0,607553507 | 0,29  | 0,835191    |
| 4930517O19Rik | -0,24 | 0,778869381 | -0,04 | 0,970020205 | 0,25  | 0,631233313 | -0,08 | 0,927867778 | -0,23 | 0,823098095 |
| 4930518C09Rik | 0,06  | 0,907391935 | 0,01  | 0,989873399 | -0,23 | 0,660920525 | -0,07 | 0,854971757 | 0,08  | 0,916173996 |
| 4930518I15Rik | 0,5   | 0,767083571 | 0,2   | 0,703291096 | 0,35  | 0,70365819  | -1,74 | 0,036218009 | -0,77 | 0,390679549 |
| 4930518P08Rik | 0,23  | 0,652260778 | 0,02  | 0,994148616 | -0,06 | 0,94110925  | -0,05 | 0,947940753 | 0,06  | 0,950211199 |
| 4930519A11Rik | -0,13 | 0,782889069 | -0,05 | 0,917821097 | 0,05  | 0,951720733 | 0,15  | 0,812625466 | -0,03 | 0,979152939 |
| 4930519D14Rik | 0,57  | 0,306829062 | 0,03  | 0,987162042 | 0,14  | 0,832412808 | 0,21  | 0,783297354 | 0,19  | 0,7983507   |
| 4930519F09Rik | 0,2   | 0,680713069 | 0,35  | 0,470112519 | -0,15 | 0,847506224 | -0,16 | 0,602492142 | 0,27  | 0,65571214  |
| 4930519F16Rik | 0,15  | 0,869565514 | -0,13 | 0,919314886 | -0,31 | 0,628048897 | 0,33  | 0,335755837 | -0,24 | 0,73350509  |
| 4930519F24Rik | 0,18  | 0,651984728 | -0,01 | 0,989174687 | 0     | 0,999931921 | 0,16  | 0,73327254  | 0,07  | 0,940438527 |

|               |       |             |       |             |       |             |       |             |       |             |
|---------------|-------|-------------|-------|-------------|-------|-------------|-------|-------------|-------|-------------|
| 4930519G04Rik | -0,04 | 0,958188047 | 0,16  | 0,882589938 | -0,05 | 0,94940954  | 0,07  | 0,914500436 | 0,2   | 0,742080065 |
| 4930519H02Rik | 0,36  | 0,513761113 | 0,45  | 0,43731683  | 0,04  | 0,950846671 | -0,31 | 0,703831158 | -0,24 | 0,818378473 |
| 4930520O04Rik | 0,3   | 0,655624944 | -0,31 | 0,816132656 | -0,08 | 0,906747817 | -0,12 | 0,87811903  | 0,03  | 0,97425848  |
| 4930520P13Rik | -0,06 | 0,915803561 | -0,18 | 0,87095497  | -0,07 | 0,943170329 | 0,34  | 0,499564387 | -0,12 | 0,901178326 |
| 4930521E06Rik | -0,05 | 0,928544937 | 0,2   | 0,606999442 | -0,05 | 0,95106142  | 0,13  | 0,721084098 | 0,07  | 0,931482657 |
| 4930521O11Rik | 0,57  | 0,428049245 | -0,33 | 0,720902851 | 0,87  | 0,57717258  | 0,22  | 0,753513962 | 0,06  | 0,969957863 |
| 4930522H14Rik | -0,21 | 0,758636946 | 0,1   | 0,855187815 | -0,02 | 0,981764312 | -0,04 | 0,94167689  | -0,22 | 0,774518756 |
| 4930522N08Rik | 0,26  | 0,579444251 | -0,18 | 0,732071998 | -0,15 | 0,818840027 | 0,16  | 0,718193921 | 0,13  | 0,883791272 |
| 4930522O17Rik | 0,13  | 0,778678404 | 0,14  | 0,927073711 | -0,21 | 0,702677589 | -0,12 | 0,774543695 | -0,16 | 0,799199452 |
| 4930523C07Rik | -0,09 | 0,906252401 | 0,13  | 0,776768299 | 0,79  | 0,275144779 | -0,79 | 0,075520945 | -0,14 | 0,861056054 |
| 4930523O13Rik | -0,14 | 0,779671753 | -0,26 | 0,569949876 | 0,15  | 0,772397144 | 0,29  | 0,411913475 | -0,01 | 0,991977803 |
| 4930524B15Rik | 0,11  | 0,898496299 | 0,47  | 0,277568816 | -0,02 | 0,983471086 | -0,4  | 0,392145468 | 0,05  | 0,961406182 |
| 4930524C18Rik | 0,51  | 0,465168175 | 0,12  | 0,806502732 | -0,03 | 0,973732268 | -0,09 | 0,855513966 | -0,19 | 0,807816401 |
| 4930524J08Rik | -0,29 | 0,54401985  | -0,02 | 0,982272343 | -0,01 | 0,99147958  | 0,37  | 0,597342466 | -0,09 | 0,937446198 |
| 4930524N10Rik | -0,08 | 0,872356025 | -0,14 | 0,790939978 | 0,07  | 0,941627748 | -0,08 | 0,909873635 | 0,11  | 0,917851608 |
| 4930524O05Rik | 0,03  | 0,972701787 | -0,41 | 0,760742789 | 0,14  | 0,857676485 | -0,14 | 0,87811903  | 0,07  | 0,948935854 |
| 4930524O07Rik | 0,05  | 0,94815841  | -0,14 | 0,901606646 | -0,25 | 0,723987482 | -0,42 | 0,581595063 | -0,55 | 0,462558109 |
| 4930524O08Rik | -0,12 | 0,854494118 | -0,07 | 0,941624351 | 0,08  | 0,899609928 | 0,29  | 0,388620368 | -0,07 | 0,925858284 |
| 4930525D18Rik | 0,36  | 0,49964886  | 0,09  | 0,948048585 | 0,52  | 0,346714942 | -0,18 | 0,932315462 | 0,48  | 0,817563348 |
| 4930525G20Rik | -0,07 | 0,903817676 | 0,27  | 0,661566887 | 0,05  | 0,941142802 | -0,37 | 0,53209785  | 0,03  | 0,980945466 |
| 4930526F13Rik | 0,13  | 0,880456078 | -0,39 | 0,335724646 | 0,02  | 0,989491273 | 0,22  | 0,577608469 | 0,23  | 0,796765717 |
| 4930526I15Rik | -0,26 | 0,680794685 | -0,14 | 0,777369073 | -0,02 | 0,987356432 | -0,2  | 0,57095196  | 0,39  | 0,416349602 |
| 4930526L06Rik | 0,28  | 0,487571132 | 0,01  | 0,994137877 | -0,1  | 0,874098993 | -0,04 | 0,919668684 | 0,11  | 0,906338603 |
| 4930527A07Rik | 0,22  | 0,665037431 | 0,24  | 0,653526959 | 0,14  | 0,804607903 | -0,16 | 0,67545976  | -0,02 | 0,985577364 |
| 4930527B05Rik | -0,08 | 0,917467935 | 0,16  | 0,752537667 | -0,13 | 0,821229302 | 0,17  | 0,676740124 | -0,07 | 0,939127163 |
| 4930527E20Rik | 0,29  | 0,48872187  | 0,03  | 0,978547588 | 0,03  | 0,967767582 | -0,1  | 0,829087694 | 0,16  | 0,833568614 |
| 4930527F14Rik | 0,65  | 0,406810971 | 0,38  | 0,536246395 | -0,24 | 0,697918847 | -0,12 | 0,804567514 | 0,27  | 0,626540936 |
| 4930527G23Rik | 0,13  | 0,790449291 | -0,12 | 0,787758076 | 0,05  | 0,95106142  | -0,21 | 0,601868312 | -0,1  | 0,917075631 |
| 4930527J03Rik | -0,14 | 0,74672311  | 0,02  | 0,981196932 | -0,14 | 0,79007666  | 0,11  | 0,778748785 | -0,15 | 0,840036408 |
| 4930528A17Rik | 0,01  | 0,982842179 | 0,07  | 0,873628464 | -0,12 | 0,869115866 | -0,29 | 0,477503193 | -0,23 | 0,719122515 |
| 4930528D03Rik | 0,17  | 0,720829271 | -0,06 | 0,938767983 | -0,2  | 0,695930773 | 0,16  | 0,716994919 | 0,11  | 0,881943508 |
| 4930528G23Rik | -0,19 | 0,717407143 | -0,05 | 0,937377463 | 0,1   | 0,910160525 | -0,03 | 0,960747562 | 0,1   | 0,890957032 |
| 4930528P14Rik | -0,25 | 0,622436248 | 0,1   | 0,927073711 | -0,08 | 0,920858287 | 0,05  | 0,908916282 | 0,17  | 0,807725933 |
| 4930529C04Rik | 0,09  | 0,869565514 | -0,03 | 0,954948291 | -0,25 | 0,688298291 | -0,08 | 0,838806433 | -0,13 | 0,885441916 |
| 4930529K09Rik | 0,13  | 0,878587671 | -0,12 | 0,803870841 | -0,16 | 0,866683512 | -0,12 | 0,753242411 | 0,01  | 0,990091016 |

|               |       |             |       |             |       |             |       |             |       |             |
|---------------|-------|-------------|-------|-------------|-------|-------------|-------|-------------|-------|-------------|
| 4930529L06Rik | -0,06 | 0,948926586 | 0,47  | 0,598307698 | 0,38  | 0,483761569 | -0,62 | 0,276210999 | 0,02  | 0,985448733 |
| 4930532G15Rik | 0,06  | 0,948926586 | -0,17 | 0,842793123 | -0,49 | 0,710465251 | -0,02 | 0,982577837 | 0,18  | 0,797293554 |
| 4930533B01Rik | 0,08  | 0,922591969 | -0,6  | 0,424068004 | -0,41 | 0,441931734 | 0,79  | 0,157087317 | 0,04  | 0,970154126 |
| 4930533K18Rik | 0,28  | 0,603330883 | -0,26 | 0,781665479 | -0,14 | 0,849342965 | 0,48  | 0,575492019 | 0,52  | 0,433531721 |
| 4930533L02Rik | 0,11  | 0,892559851 | 0,26  | 0,694759677 | -0,01 | 0,990836784 | -0,23 | 0,835661179 | -0,24 | 0,84326434  |
| 4930533P14Rik | 0     | 0,996998625 | -0,01 | 0,994137877 | -0,2  | 0,776071062 | -0,17 | 0,679389108 | 0,11  | 0,88288747  |
| 4930535I16Rik | 0,06  | 0,925626077 | -0,08 | 0,926134516 | -0,43 | 0,551581802 | 0,25  | 0,652092536 | 0,33  | 0,677687906 |
| 4930538E20Rik | -0,17 | 0,661579518 | 0,17  | 0,732044571 | -0,26 | 0,660517013 | -0,07 | 0,908141892 | -0,19 | 0,806478588 |
| 4930538K18Rik | 0,23  | 0,779680378 | 0,46  | 0,667502888 | -0,49 | 0,436827113 | -0,12 | 0,873610553 | -0,06 | 0,962094947 |
| 4930539C22Rik | 0,02  | 0,976574175 | -0,02 | 0,989873399 | 0     | 0,99879674  | -0,11 | 0,884713104 | -0,19 | 0,848577027 |
| 4930539E08Rik | 0,12  | 0,850851423 | 0,05  | 0,966717367 | -0,33 | 0,51127708  | 0,03  | 0,971544081 | 0,07  | 0,951429597 |
| 4930539J05Rik | 0,51  | 0,665625405 | 0,3   | 0,897038013 | 0,38  | 0,510468874 | -1,22 | 0,041065603 | -0,89 | 0,45194553  |
| 4930539M17Rik | 0,02  | 0,973883276 | 0,29  | 0,643955364 | 0,08  | 0,930489319 | -0,08 | 0,884799739 | -0,55 | 0,389151645 |
| 4930539N22Rik | -0,04 | 0,963914207 | -0,19 | 0,781013517 | -0,05 | 0,948966065 | -0,11 | 0,815924634 | -0,06 | 0,947437555 |
| 4930540M03Rik | 0,39  | 0,782859495 | 0,08  | 0,87571112  | -0,11 | 0,904057901 | -0,56 | 0,483445334 | -0,17 | 0,876666201 |
| 4930540M05Rik | 0,23  | 0,80260514  | 0,34  | 0,44265541  | 0,02  | 0,991168026 | -0,04 | 0,972244785 | 0,32  | 0,720432404 |
| 4930542C12Rik | -0,03 | 0,955999577 | -0,11 | 0,823625246 | 0,04  | 0,953917674 | -0,07 | 0,878417314 | -0,25 | 0,667535157 |
| 4930542C16Rik | -0,07 | 0,909529233 | -0,07 | 0,913777818 | -0,16 | 0,855887253 | 0,3   | 0,473230276 | 0,29  | 0,671041952 |
| 4930542C21Rik | 0,15  | 0,767388996 | 0,29  | 0,653526959 | -0,1  | 0,909233941 | -0,08 | 0,823045201 | 0,18  | 0,851265372 |
| 4930542D17Rik | -0,13 | 0,839471353 | -0,39 | 0,640299669 | 0     | 0,998959099 | -0,48 | 0,314683063 | 1,3   | 0,168532878 |
| 4930543E12Rik | 0,33  | 0,421378808 | -0,49 | 0,316289337 | 0,31  | 0,552093103 | 0,2   | 0,699348716 | 0,21  | 0,796046747 |
| 4930544D05Rik | 0,24  | 0,770629351 | -0,14 | 0,809683705 | 0     | 0,998479656 | 0,25  | 0,56246056  | 0,08  | 0,939930189 |
| 4930544G11Rik | -0,01 | 0,990894139 | -0,52 | 0,268436493 | -0,1  | 0,901410016 | 0,11  | 0,810243982 | -0,04 | 0,96963338  |
| 4930544I03Rik | 0,36  | 0,513412557 | 0,03  | 0,972482322 | 0,08  | 0,90577997  | 0     | 1           | 0,14  | 0,843846988 |
| 4930544L04Rik | 0     | 0,999134159 | -0,35 | 0,687527972 | -0,09 | 0,909985189 | 0,39  | 0,509274266 | 0,08  | 0,918465043 |
| 4930544M13Rik | 0,19  | 0,84900712  | 0,34  | 0,771641267 | -0,09 | 0,939946915 | -0,04 | 0,970555418 | 0,11  | 0,921720089 |
| 4930545E07Rik | -0,08 | 0,879432304 | -0,28 | 0,603359081 | -0,17 | 0,777568498 | 0,03  | 0,96316807  | -0,29 | 0,574486952 |
| 4930545H06Rik | -0,27 | 0,66821532  | 0,21  | 0,706671369 | 0,19  | 0,76370647  | -0,16 | 0,740394763 | -0,02 | 0,984125319 |
| 4930545L23Rik | 0,12  | 0,884230844 | 0,22  | 0,58591598  | 0,2   | 0,774337646 | 0,13  | 0,802239788 | -0,19 | 0,78512653  |
| 4930546C10Rik | 0,06  | 0,943736931 | 0,25  | 0,671302172 | -0,35 | 0,473499244 | -0,41 | 0,305351657 | -0,17 | 0,794006294 |
| 4930546K05Rik | 0,19  | 0,850491134 | -0,15 | 0,818072947 | -0,05 | 0,961337501 | -0,02 | 0,983241076 | 0,38  | 0,567926374 |
| 4930547E08Rik | 0,19  | 0,673291416 | -0,06 | 0,922703368 | 0,08  | 0,928115273 | 0,12  | 0,78925905  | 0,21  | 0,720844381 |
| 4930547E14Rik | 0,2   | 0,769736014 | -0,27 | 0,785573503 | 0,17  | 0,742758388 | 0,44  | 0,346570636 | -0,01 | 0,992370267 |
| 4930547M16Rik | 0,34  | 0,423395139 | -0,07 | 0,8910846   | -0,04 | 0,963199274 | 0,34  | 0,270815366 | 0,33  | 0,619416028 |
| 4930548G14Rik | -0,04 | 0,959985598 | 0,31  | 0,664403089 | -0,47 | 0,387362229 | -0,26 | 0,447060315 | -0,29 | 0,628242993 |

|               |       |             |       |             |       |             |       |             |       |             |
|---------------|-------|-------------|-------|-------------|-------|-------------|-------|-------------|-------|-------------|
| 4930548H24Rik | 0,71  | 0,087910462 | -0,24 | 0,728339186 | -0,38 | 0,545324726 | 0,68  | 0,171856639 | 0,15  | 0,825098047 |
| 4930548J01Rik | -0,14 | 0,864922165 | 0,15  | 0,733180951 | 0,01  | 0,9954711   | -0,14 | 0,747789123 | 0,12  | 0,889613878 |
| 4930548K13Rik | -0,06 | 0,947474694 | 0,11  | 0,826722506 | -0,18 | 0,709105622 | 0,34  | 0,37282017  | 0,31  | 0,565817768 |
| 4930549C01Rik | -0,11 | 0,833275012 | -0,19 | 0,880473303 | 0,21  | 0,830336321 | 0,11  | 0,932315462 | -0,15 | 0,823098095 |
| 4930549G23Rik | 0,04  | 0,957218699 | -0,12 | 0,936792848 | 0,23  | 0,803829333 | -0,04 | 0,952740331 | -0,51 | 0,32673984  |
| 4930550C14Rik | 1,05  | 0,089282283 | 0,06  | 0,893276569 | -0,05 | 0,961464515 | 1,07  | 0,042893515 | 1,76  | 0,024119434 |
| 4930550C17Rik | 0,1   | 0,87143427  | 0,05  | 0,958545812 | -0,16 | 0,802757077 | -0,28 | 0,692059018 | -0,04 | 0,979152939 |
| 4930550L24Rik | 0,29  | 0,464825261 | -0,1  | 0,908448947 | -0,23 | 0,783006    | -0,14 | 0,692732236 | -0,2  | 0,781405349 |
| 4930551L18Rik | 0,07  | 0,882794094 | 0,29  | 0,494161701 | 0,35  | 0,598179126 | -0,19 | 0,700442604 | -0,17 | 0,891925115 |
| 4930551O13Rik | 0,29  | 0,424255302 | 0,22  | 0,607367758 | -0,17 | 0,762284261 | -0,14 | 0,70136857  | -0,12 | 0,872302501 |
| 4930552N02Rik | -0,26 | 0,662416763 | 0,02  | 0,981635653 | 0,09  | 0,911634383 | 0,08  | 0,857884225 | 0,37  | 0,518216192 |
| 4930552P12Rik | 0,37  | 0,617280733 | 0,03  | 0,970020205 | 0,03  | 0,980423952 | -0,21 | 0,7178715   | -0,14 | 0,853107295 |
| 4930553E22Rik | -0,17 | 0,869565514 | 0,25  | 0,73623784  | -0,08 | 0,915713144 | 0,19  | 0,877391482 | 0,36  | 0,708898543 |
| 4930553J12Rik | 0,57  | 0,168541702 | 0,03  | 0,965039248 | -0,2  | 0,721083003 | 0,02  | 0,962043341 | 0,1   | 0,908748301 |
| 4930553M12Rik | -0,07 | 0,886889675 | 0     | 1           | -0,05 | 0,950052494 | 0     | 1           | 0,1   | 0,890396963 |
| 4930554C24Rik | 0,35  | 0,468008776 | -0,37 | 0,463954617 | 0,01  | 0,994530858 | 0,15  | 0,800853287 | 0,02  | 0,980961333 |
| 4930554G24Rik | -0,02 | 0,984747015 | -0,1  | 0,873446866 | -0,08 | 0,919754592 | -0,32 | 0,390641873 | 0,05  | 0,960175192 |
| 4930554H23Rik | 0,24  | 0,71129252  | 0,18  | 0,773094512 | 0,05  | 0,966414094 | 0,11  | 0,848348725 | -0,31 | 0,697818445 |
| 4930555A03Rik | 0,02  | 0,976977482 | -0,09 | 0,874195024 | -0,02 | 0,984655026 | -0,5  | 0,353697839 | -0,12 | 0,890957032 |
| 4930555B11Rik | 0,13  | 0,803737003 | 0,18  | 0,694759677 | -0,12 | 0,846458227 | 0,25  | 0,587649542 | 0,1   | 0,900611003 |
| 4930555B12Rik | 0,14  | 0,749756723 | 0,15  | 0,738199172 | -0,22 | 0,643853175 | 0,08  | 0,84134133  | 0,24  | 0,638780444 |
| 4930555F03Rik | 0,07  | 0,931340184 | -0,45 | 0,596331741 | 0,22  | 0,70635953  | 0,07  | 0,899003207 | -0,24 | 0,70740752  |
| 4930555G01Rik | 0,89  | 0,187868882 | 1,23  | 0,081051183 | -1,1  | 0,084679044 | 1,17  | 0,041009258 | 0,34  | 0,705953802 |
| 4930555O08Rik | -0,21 | 0,656726345 | -0,01 | 0,996113371 | -0,24 | 0,628427952 | 0     | 0,998710655 | 0,03  | 0,975200543 |
| 4930556C24Rik | 0,19  | 0,744500908 | 0,19  | 0,771641267 | -0,04 | 0,955770074 | 0,07  | 0,889143988 | 0,1   | 0,913274952 |
| 4930556G01Rik | -0,05 | 0,944291635 | 0,06  | 0,963631809 | 0,4   | 0,660610212 | -0,2  | 0,785027978 | -0,26 | 0,770282628 |
| 4930556J02Rik | 0,2   | 0,704646948 | 0,02  | 0,969314504 | -0,48 | 0,290123118 | 0,17  | 0,694368504 | 0,02  | 0,980693349 |
| 4930556J24Rik | 0,02  | 0,983807636 | -0,4  | 0,518998821 | 0,28  | 0,598179126 | -0,02 | 0,96939036  | -0,07 | 0,940878193 |
| 4930556L07Rik | -0,31 | 0,530808572 | -0,3  | 0,624589692 | 0,05  | 0,949243931 | 0,21  | 0,497490252 | -0,12 | 0,860058375 |
| 4930556M19Rik | -0,26 | 0,687662951 | 0,18  | 0,827496723 | -0,38 | 0,433682567 | -1,01 | 0,048295711 | -0,26 | 0,805072752 |
| 4930556N09Rik | 0,19  | 0,816316218 | 0,46  | 0,637958543 | 0,07  | 0,938771378 | 0,38  | 0,616285736 | 0,43  | 0,660989136 |
| 4930556N13Rik | -0,13 | 0,761120978 | -0,2  | 0,614746724 | -0,26 | 0,638965268 | -0,22 | 0,698568816 | 0,04  | 0,96539383  |
| 4930557A04Rik | -0,05 | 0,964358894 | -0,04 | 0,973945454 | -0,1  | 0,905724637 | 0,18  | 0,64875897  | -0,38 | 0,608004947 |
| 4930557F10Rik | 0,01  | 0,979130815 | 0,02  | 0,98230594  | -0,03 | 0,968008918 | 0,05  | 0,923775458 | 0     | 0,994636468 |
| 4930557J02Rik | 0,12  | 0,830575431 | 0,04  | 0,956504634 | -0,18 | 0,798711591 | 0,19  | 0,780158307 | -0,32 | 0,639785525 |

|               |       |             |       |             |       |             |       |             |       |             |
|---------------|-------|-------------|-------|-------------|-------|-------------|-------|-------------|-------|-------------|
| 4930558C23Rik | 0,2   | 0,625047645 | -0,01 | 0,99422201  | -0,17 | 0,798320169 | 0,01  | 0,985865561 | 0,05  | 0,954694993 |
| 4930558G05Rik | 0,06  | 0,922341271 | 0,27  | 0,664787536 | -0,1  | 0,903345253 | 0,27  | 0,572573031 | 0,39  | 0,545995133 |
| 4930558J18Rik | -0,1  | 0,856118781 | -0,02 | 0,985909622 | 0,02  | 0,984879454 | 0,25  | 0,512935647 | -0,1  | 0,909363599 |
| 4930558J22Rik | 0,18  | 0,785864159 | 0,25  | 0,493580894 | -0,14 | 0,889818596 | -0,26 | 0,523255995 | 0,12  | 0,904836805 |
| 4930558K02Rik | 0,36  | 0,392217599 | -1,07 | 0,511452313 | -0,31 | 0,697582993 | 0,77  | 0,266021355 | 0,01  | 0,992694729 |
| 4930562A09Rik | 0,11  | 0,852358078 | 0,17  | 0,732044571 | -0,05 | 0,950278774 | -0,18 | 0,639359737 | 0,11  | 0,872431573 |
| 4930562C15Rik | 0,04  | 0,968370059 | 0,05  | 0,956049982 | -0,11 | 0,878636183 | -0,04 | 0,963752888 | 0     | 0,998424441 |
| 4930562D21Rik | -0,05 | 0,932654105 | -0,25 | 0,628442147 | -0,05 | 0,936097567 | 0,09  | 0,856184745 | -0,17 | 0,788112596 |
| 4930562F07Rik | 0,23  | 0,714662474 | 0,11  | 0,894479886 | -0,04 | 0,974836642 | 0,2   | 0,6876055   | 0,05  | 0,955499131 |
| 4930563D23Rik | 0,14  | 0,866788377 | 0,26  | 0,726534004 | -0,22 | 0,804785961 | -0,22 | 0,631049468 | 0,08  | 0,953297732 |
| 4930563E18Rik | -0,22 | 0,757032046 | -0,46 | 0,591305258 | -0,54 | 0,437676086 | 0,33  | 0,483420195 | 0,06  | 0,969720149 |
| 4930563E22Rik | 0,28  | 0,739000204 | 0,12  | 0,853162838 | 0,32  | 0,809137779 | -0,21 | 0,825166016 | 0,2   | 0,923951087 |
| 4930563F08Rik | -0,2  | 0,81630789  | -0,44 | 0,688435265 | -0,23 | 0,736630059 | 0,21  | 0,742291133 | 0,19  | 0,823098095 |
| 4930563I02Rik | 0,19  | 0,729108809 | 0,23  | 0,859954464 | -0,33 | 0,562169896 | -0,05 | 0,909632442 | -0,14 | 0,825966687 |
| 4930563M20Rik | -0,1  | 0,858869926 | -0,24 | 0,864989815 | 0,09  | 0,913228427 | 0,17  | 0,775197231 | 0,1   | 0,890957032 |
| 4930563M21Rik | 0,19  | 0,767230044 | -0,37 | 0,515826726 | -0,4  | 0,446493846 | 0,13  | 0,837974367 | -0,12 | 0,875906643 |
| 4930564C03Rik | -0,02 | 0,982721718 | -0,13 | 0,776548278 | 0,1   | 0,857100866 | 0,05  | 0,908141892 | 0,05  | 0,951223734 |
| 4930564D02Rik | 0,11  | 0,818182081 | -0,14 | 0,847821325 | -0,04 | 0,9617386   | 0,23  | 0,548063783 | -0,09 | 0,924618962 |
| 4930565D16Rik | 0     | 0,998769353 | -0,37 | 0,457889449 | -0,07 | 0,940276719 | -0,13 | 0,768620889 | -0,39 | 0,612711737 |
| 4930565N06Rik | 0,17  | 0,776721795 | 0,18  | 0,886286684 | -0,15 | 0,823823322 | 0,3   | 0,506792594 | 0,28  | 0,678938588 |
| 4930566F21Rik | 0,06  | 0,932531737 | -0,33 | 0,755498335 | 0,13  | 0,861009818 | 0,44  | 0,305351657 | 0,25  | 0,726042963 |
| 4930566N20Rik | 0,03  | 0,965116762 | -0,35 | 0,459231649 | 0     | 0,997145286 | 0,23  | 0,615181679 | 0,29  | 0,717616723 |
| 4930567H12Rik | 0,13  | 0,858977038 | -0,04 | 0,965147491 | 0,12  | 0,880706627 | -0,13 | 0,85301747  | 0,2   | 0,740522769 |
| 4930567H17Rik | 0,1   | 0,864995222 | -0,14 | 0,787375724 | 0,05  | 0,95204022  | -0,05 | 0,908141892 | 0,02  | 0,97872616  |
| 4930567J20Rik | 0,16  | 0,764288636 | 0,14  | 0,905566075 | 0,11  | 0,867543859 | 0,12  | 0,7975866   | 0,23  | 0,726042963 |
| 4930567K20Rik | 0,52  | 0,640002115 | 0,06  | 0,961657201 | 0,13  | 0,875106368 | 0,12  | 0,854971757 | 0,14  | 0,85945887  |
| 4930568D16Rik | -0,21 | 0,733583213 | 0,12  | 0,842793123 | 0,02  | 0,985187368 | -0,4  | 0,212925448 | -0,14 | 0,872242794 |
| 4930568E12Rik | 0,03  | 0,972701787 | -0,12 | 0,853388981 | -0,17 | 0,867109522 | 0,28  | 0,522230981 | 0,36  | 0,599124106 |
| 4930568G15Rik | 0,06  | 0,934106306 | -0,05 | 0,9152526   | -0,28 | 0,578938863 | 0,34  | 0,517178455 | 0,6   | 0,551563576 |
| 4930569F06Rik | 0,08  | 0,859825896 | -0,1  | 0,838275022 | 0,1   | 0,913333366 | 0,07  | 0,942182477 | -0,04 | 0,969910415 |
| 4930570D08Rik | -0,78 | 0,106666298 | -0,52 | 0,373555617 | 0,26  | 0,680127367 | 0,82  | 0,183972008 | 0,12  | 0,901007891 |
| 4930570E03Rik | -0,13 | 0,756942192 | 0,03  | 0,980518468 | -0,13 | 0,844709981 | -0,18 | 0,697364261 | 0,29  | 0,613640075 |
| 4930570G19Rik | 0,27  | 0,661993372 | -0,02 | 0,982053677 | -0,06 | 0,937245525 | 0,14  | 0,778212842 | -0,11 | 0,925731979 |
| 4930570N18Rik | 0,12  | 0,763511241 | -0,1  | 0,815791007 | 0     | 0,999931921 | 0,25  | 0,575492019 | -0,29 | 0,584694999 |
| 4930571B16Rik | 0,5   | 0,311022075 | 0,2   | 0,614530823 | -0,27 | 0,519796196 | -0,14 | 0,782985879 | 0,15  | 0,87753185  |



|               |       |             |       |             |       |             |       |             |       |             |
|---------------|-------|-------------|-------|-------------|-------|-------------|-------|-------------|-------|-------------|
| 4930571K23Rik | 0,1   | 0,891156481 | -0,03 | 0,977204386 | 0,02  | 0,977827235 | -0,3  | 0,431967511 | -0,07 | 0,920672776 |
| 4930571N24Rik | 0,2   | 0,827055517 | -0,87 | 0,583200444 | -0,03 | 0,990836784 | 1,03  | 0,230515663 | 0,04  | 0,977991682 |
| 4930572K03Rik | 0,32  | 0,750634506 | -0,19 | 0,808863849 | 0,08  | 0,946237452 | 0,23  | 0,698586319 | -0,15 | 0,893064058 |
| 4930572O03Rik | 0,09  | 0,905410816 | 0,31  | 0,836404534 | 0,26  | 0,733423502 | -0,37 | 0,835175707 | -0,67 | 0,654872635 |
| 4930572O13Rik | -0,18 | 0,78120519  | -0,08 | 0,880597826 | -0,51 | 0,37721644  | -0,09 | 0,816912202 | 0,1   | 0,931191187 |
| 4930573C08Rik | 0,18  | 0,682102965 | 0,11  | 0,897867961 | -0,2  | 0,721952929 | -0,01 | 0,994422152 | 0,16  | 0,865258929 |
| 4930573O16Rik | -0,25 | 0,708991824 | -0,13 | 0,912137323 | -0,38 | 0,584320897 | 0,17  | 0,891764078 | 0,28  | 0,745134899 |
| 4930577H14Rik | -0,12 | 0,825618574 | 0,18  | 0,717340497 | 0     | 0,997581017 | -0,31 | 0,455867586 | 0,16  | 0,797699757 |
| 4930577N17Rik | -0,59 | 0,374743123 | 0,12  | 0,861862086 | 0,14  | 0,812611111 | 0,17  | 0,909976349 | -0,02 | 0,990633766 |
| 4930578C19Rik | -0,4  | 0,455714377 | -1,1  | 0,235116318 | 0,64  | 0,609295984 | 0,36  | 0,574796787 | -0,81 | 0,391113982 |
| 4930578E11Rik | -0,26 | 0,612955561 | -0,34 | 0,525463389 | -0,58 | 0,304899885 | -0,16 | 0,866760121 | 0,13  | 0,924867043 |
| 4930578G10Rik | -0,22 | 0,617280733 | -0,25 | 0,647274288 | -0,2  | 0,806102885 | -0,17 | 0,716196962 | 0,09  | 0,916173996 |
| 4930578I06Rik | -0,06 | 0,937129467 | 0,34  | 0,674832256 | 0,14  | 0,864411302 | -0,31 | 0,509274266 | 0,03  | 0,981677577 |
| 4930578I07Rik | 0,28  | 0,617280733 | 0,01  | 0,989873399 | -0,29 | 0,640464842 | -0,05 | 0,900641924 | 0,48  | 0,272986942 |
| 4930578L24Rik | -0,24 | 0,711172699 | -0,21 | 0,839789639 | -0,21 | 0,821229302 | -0,21 | 0,639359737 | -0,16 | 0,813490069 |
| 4930578M01Rik | 0,02  | 0,978605616 | -0,12 | 0,912137323 | -0,12 | 0,889371168 | 0,17  | 0,663121129 | -0,01 | 0,991977803 |
| 4930578N18Rik | -0,19 | 0,799974873 | 0,06  | 0,938711163 | -0,11 | 0,844854601 | 0,59  | 0,256184646 | -0,03 | 0,976743304 |
| 4930579D07Rik | 0,07  | 0,903817676 | 0     | 0,999395995 | -0,24 | 0,628048897 | -0,07 | 0,885020399 | -0,07 | 0,939127163 |
| 4930579D09Rik | 0,25  | 0,49976831  | 0,1   | 0,882847123 | 0,01  | 0,989252542 | -0,02 | 0,975687196 | 0,02  | 0,983469081 |
| 4930579F01Rik | -0,11 | 0,822684568 | -0,12 | 0,775914311 | -0,12 | 0,8255493   | -0,03 | 0,965565431 | -0,24 | 0,718869886 |
| 4930579G18Rik | 0,04  | 0,958188047 | 0,4   | 0,76510477  | -0,31 | 0,550662565 | -0,25 | 0,74940601  | 0,18  | 0,764124978 |
| 4930579G24Rik | -0,71 | 0,315075741 | -0,22 | 0,772415321 | 1,29  | 0,093530523 | -0,05 | 0,961963439 | -1,2  | 0,206819215 |
| 4930579K19Rik | -0,5  | 0,562609036 | -0,23 | 0,74245372  | 0,16  | 0,898684568 | 0,11  | 0,799497793 | 0,14  | 0,849560772 |
| 4930579K21    | 0,11  | 0,7987021   | 0,03  | 0,94581674  | 0,01  | 0,995985283 | 0,13  | 0,822506204 | 0,08  | 0,940878193 |
| 4930579M01Rik | 0,11  | 0,858748956 | 0,3   | 0,538179428 | -0,11 | 0,871531251 | -0,08 | 0,85072326  | 0,09  | 0,899825706 |
| 4930579O11Rik | -0,19 | 0,667813356 | 0,07  | 0,928134372 | -0,09 | 0,889239165 | 0,14  | 0,816723217 | 0,19  | 0,843629889 |
| 4930581F22Rik | 0,13  | 0,915575695 | 0,7   | 0,531460115 | -0,24 | 0,786630361 | -0,69 | 0,253294027 | 0,04  | 0,967314981 |
| 4930583I09Rik | 0,26  | 0,707480624 | 0,44  | 0,640737293 | 0,1   | 0,919309335 | 0,04  | 0,960547981 | -0,19 | 0,82482852  |
| 4930583K01Rik | -0,03 | 0,963329626 | 0     | 1           | -0,12 | 0,904057901 | 0,04  | 0,93194747  | 0,1   | 0,898872516 |
| 4930583P06Rik | 0,22  | 0,66331039  | -0,13 | 0,808222835 | 0,13  | 0,797422121 | -0,06 | 0,874701048 | -0,03 | 0,975441362 |
| 4930584F24Rik | 0,1   | 0,895870455 | -0,23 | 0,626813472 | -0,04 | 0,962549125 | -0,34 | 0,368347396 | -0,34 | 0,480475596 |
| 4930586N03Rik | -0,45 | 0,493455979 | 0     | 1           | 0,02  | 0,987390039 | 0     | 1           | -0,42 | 0,625751363 |
| 4930587A21Rik | 0,08  | 0,902034157 | 0,14  | 0,785065747 | -0,01 | 0,994120125 | -0,06 | 0,896599656 | -0,13 | 0,874554354 |
| 4930588J15Rik | 0,13  | 0,839881823 | 0,07  | 0,89545828  | -0,15 | 0,770526999 | 0,17  | 0,623313665 | 0,17  | 0,796586414 |
| 4930588K23Rik | 0,08  | 0,889776123 | 0,02  | 0,984006421 | -0,06 | 0,922318683 | 0,08  | 0,87811903  | 0,16  | 0,83923583  |

|               |       |             |       |             |       |             |       |             |       |             |
|---------------|-------|-------------|-------|-------------|-------|-------------|-------|-------------|-------|-------------|
| 4930589L23Rik | 0,08  | 0,958512892 | 0     | 1           | 0,33  | 0,500849254 | -0,86 | 0,593753839 | -0,2  | 0,912326206 |
| 4930589P08Rik | -0,02 | 0,98456417  | -0,05 | 0,965413567 | -0,04 | 0,969570532 | 0,05  | 0,95602452  | -0,12 | 0,905753594 |
| 4930590J08Rik | 0,43  | 0,554731565 | 0,24  | 0,725904452 | 0,38  | 0,497851498 | -0,27 | 0,644491109 | -0,42 | 0,484545257 |
| 4930590L20Rik | -0,19 | 0,616848846 | -0,24 | 0,750555245 | -0,08 | 0,888371896 | 0,37  | 0,389492505 | -0,19 | 0,824818547 |
| 4930591A17Rik | 0,4   | 0,508688727 | -0,09 | 0,90164068  | -0,08 | 0,953074345 | -0,3  | 0,460307888 | 0,13  | 0,868494821 |
| 4930592A05Rik | 0,15  | 0,865689677 | 0,04  | 0,959837002 | -0,02 | 0,982648972 | -0,21 | 0,691869626 | -0,09 | 0,920757629 |
| 4930592I03Rik | 0,32  | 0,661747653 | 0,66  | 0,458770201 | -0,64 | 0,420501729 | -0,69 | 0,097913459 | 0,67  | 0,353136904 |
| 4930593A02Rik | 0,03  | 0,966363948 | 0,08  | 0,936792848 | -0,04 | 0,96858449  | -0,27 | 0,739388845 | -0,13 | 0,912683275 |
| 4930593C16Rik | 0,1   | 0,863067773 | 0,01  | 0,993398521 | -0,18 | 0,785858646 | -0,05 | 0,910007668 | 0,17  | 0,819072786 |
| 4930594C11Rik | 0,6   | 0,546065357 | -0,31 | 0,450538273 | -0,64 | 0,581742447 | 2,35  | 0,023573716 | 0,16  | 0,885726941 |
| 4930594M22Rik | -0,04 | 0,969949459 | 0     | 1           | 0,28  | 0,809137779 | -0,7  | 0,572928314 | 0,36  | 0,866693394 |
| 4930594O21Rik | -0,26 | 0,755421284 | -0,11 | 0,901888996 | 0,24  | 0,693902137 | 0,36  | 0,468490835 | 0     | 0,998746436 |
| 4930595D18Rik | 0,51  | 0,662948451 | 0,01  | 0,990052916 | 0,21  | 0,786016454 | 0,26  | 0,665832193 | 0,51  | 0,515021287 |
| 4930595M18Rik | 0,68  | 0,398157125 | 0,39  | 0,42852265  | -0,43 | 0,462643491 | -0,31 | 0,567266717 | 0,2   | 0,808077941 |
| 4930596D02Rik | 0,19  | 0,706274249 | -0,05 | 0,917821097 | -0,13 | 0,853888307 | 0,03  | 0,971338071 | -0,12 | 0,873506336 |
| 4930596I21Rik | 0,25  | 0,705404186 | 0,09  | 0,897574732 | -0,39 | 0,657033969 | -0,58 | 0,597350222 | -0,33 | 0,746512314 |
| 4930597A21Rik | -0,21 | 0,754711559 | -0,31 | 0,763005394 | -0,11 | 0,903675834 | 0,2   | 0,713579222 | 0,06  | 0,955247021 |
| 4930597G03Rik | 0,02  | 0,966775766 | -0,31 | 0,5291312   | 0,21  | 0,76994964  | -0,04 | 0,957573971 | -0,17 | 0,851637639 |
| 4930597O21Rik | -0,65 | 0,727413551 | 1,31  | 0,464360937 | -0,24 | 0,906602658 | -1    | 0,308923754 | 0,54  | 0,571122283 |
| 4930598A11Rik | 0,12  | 0,90308793  | -0,21 | 0,824691053 | 0,11  | 0,896728577 | -0,14 | 0,820418236 | 0,22  | 0,853107295 |
| 4930598F16Rik | 0,25  | 0,685823963 | 0,18  | 0,706028548 | 0,09  | 0,891390587 | 0,17  | 0,726641891 | 0,16  | 0,857606999 |
| 4930599N23Rik | 0,56  | 0,576406658 | 0,57  | 0,235239236 | -0,51 | 0,473499244 | -0,92 | 0,136974257 | 0,53  | 0,470021545 |
| 4931400O07Rik | 0,04  | 0,962660554 | -0,32 | 0,614530823 | -0,19 | 0,746677927 | 0,35  | 0,502610783 | 0,17  | 0,836209924 |
| 4931402G19Rik | -0,36 | 0,510737023 | -0,32 | 0,612645853 | -0,5  | 0,436827113 | 0,03  | 0,962670023 | -0,24 | 0,789358981 |
| 4931403E22Rik | -0,02 | 0,98225675  | 0,18  | 0,754479452 | -0,01 | 0,99394877  | -0,4  | 0,467341604 | -0,34 | 0,61355523  |
| 4931403G20Rik | 0,02  | 0,98659023  | 0,11  | 0,807175471 | 0,1   | 0,884651037 | 0,2   | 0,55023817  | 0,45  | 0,332300903 |
| 4931403M11Rik | 0,22  | 0,692490424 | 0     | 1           | 0,02  | 0,976937619 | 0,24  | 0,561974208 | 0,21  | 0,706246121 |
| 4931406B18Rik | 0,26  | 0,7677402   | -0,43 | 0,353346153 | 0,68  | 0,161486984 | 0,5   | 0,12331627  | 0,04  | 0,97425848  |
| 4931406C07Rik | 0,08  | 0,925737471 | -0,31 | 0,579092842 | 0,64  | 0,435556279 | 0,24  | 0,536893933 | -0,09 | 0,928199957 |
| 4931406H21Rik | 0,02  | 0,98225675  | -0,18 | 0,801020395 | -0,39 | 0,661538963 | -0,74 | 0,375975276 | -0,16 | 0,884640084 |
| 4931406P16Rik | -0,25 | 0,534017117 | -0,33 | 0,389589881 | -0,07 | 0,940489823 | -0,14 | 0,74524486  | -0,41 | 0,451817916 |
| 4931408C20Rik | -0,1  | 0,835830248 | 0,17  | 0,879427032 | 0,02  | 0,989336214 | -0,06 | 0,90213506  | -0,09 | 0,914498972 |
| 4931408D14Rik | -0,04 | 0,949241841 | -0,22 | 0,564387918 | 0,08  | 0,917981605 | 0,07  | 0,921103595 | -0,15 | 0,855281866 |
| 4931409K22Rik | 0,11  | 0,846360756 | 0,01  | 0,997537323 | 0,34  | 0,527929204 | -0,18 | 0,71158821  | -0,27 | 0,758052028 |
| 4931413I07Rik | -0,01 | 0,99658     | 0,08  | 0,906777728 | -0,28 | 0,576592414 | 0,19  | 0,67498969  | -0,01 | 0,99004065  |

|               |       |             |       |             |       |             |       |             |       |             |
|---------------|-------|-------------|-------|-------------|-------|-------------|-------|-------------|-------|-------------|
| 4931413K12Rik | -0,11 | 0,822613889 | 0,15  | 0,832841509 | 0,03  | 0,973802765 | 0,02  | 0,968162501 | -0,11 | 0,866285506 |
| 4931414P19Rik | 0,3   | 0,770273483 | -0,07 | 0,944306982 | -0,27 | 0,840284573 | -0,32 | 0,624319809 | -0,31 | 0,721825544 |
| 4931415C17Rik | 0,17  | 0,704720946 | 0,23  | 0,690142458 | 0,14  | 0,86085314  | -0,34 | 0,653702454 | -0,2  | 0,89529118  |
| 4931417E11Rik | 0,17  | 0,681277603 | 0,01  | 0,994802028 | -0,15 | 0,818840027 | 0,11  | 0,840946891 | -0,15 | 0,80222716  |
| 4931419H13Rik | 0,46  | 0,416909288 | -0,12 | 0,876459111 | 0,69  | 0,264710295 | -0,46 | 0,342459451 | -0,14 | 0,883418056 |
| 4931420L22Rik | 0,02  | 0,972989101 | 0,02  | 0,982047684 | -0,26 | 0,701878082 | -0,31 | 0,598858826 | -0,15 | 0,871007445 |
| 4931422A03Rik | 0,11  | 0,878883585 | 0,21  | 0,84619405  | -0,23 | 0,755781659 | 0,12  | 0,872201717 | 0,29  | 0,69059025  |
| 4931423N10Rik | 0,4   | 0,625573018 | -0,29 | 0,681843831 | 0,05  | 0,963287567 | 0,31  | 0,540951246 | 0,78  | 0,136515453 |
| 4931428F04Rik | -0,06 | 0,967225725 | 0,16  | 0,757087521 | 0,16  | 0,90555701  | 0,1   | 0,923959343 | -0,14 | 0,945776926 |
| 4931428L18Rik | 0,13  | 0,898024085 | -0,06 | 0,938711163 | 0     | 0,998119479 | -0,01 | 0,988777946 | 0,03  | 0,975200543 |
| 4931429L15Rik | -0,14 | 0,835208982 | -0,07 | 0,947107147 | -0,22 | 0,725191296 | -0,03 | 0,967047406 | -0,3  | 0,745260223 |
| 4931429P17Rik | -0,15 | 0,847070804 | 0,14  | 0,816121519 | 0,3   | 0,693459873 | 0,05  | 0,967866794 | 0,4   | 0,72210597  |
| 4931430N09Rik | -0,16 | 0,750334502 | 0,15  | 0,75380926  | 0,01  | 0,990836784 | -0,14 | 0,81613843  | 0,13  | 0,906338603 |
| 4931431B13Rik | -0,14 | 0,839375532 | -0,09 | 0,919144578 | 0,34  | 0,599127793 | -0,1  | 0,807489629 | -0,2  | 0,735152891 |
| 4931431C16Rik | 0,2   | 0,777898015 | -0,01 | 0,994424327 | -0,13 | 0,861307315 | 0,29  | 0,709570719 | -0,05 | 0,967807075 |
| 4931431F19Rik | 0     | 0,997487069 | -0,35 | 0,707806354 | -0,29 | 0,688126003 | 0,46  | 0,367482816 | -0,12 | 0,886277205 |
| 4931440F15Rik | 0,28  | 0,621995081 | 0,21  | 0,845712013 | -0,33 | 0,666715303 | 0,09  | 0,906676611 | 0,36  | 0,646919634 |
| 4931440J10Rik | 0,11  | 0,815872958 | -0,18 | 0,882931058 | -0,01 | 0,993935103 | -0,34 | 0,437635562 | -0,11 | 0,900611003 |
| 4931440P22Rik | 0,04  | 0,964272364 | 0,52  | 0,606999442 | 0,16  | 0,841563482 | -0,55 | 0,601687553 | 0,06  | 0,961749007 |
| 4932407I05    | -0,15 | 0,832696131 | -0,01 | 0,992175086 | 0,3   | 0,644778361 | 0,13  | 0,779059536 | -0,34 | 0,612054078 |
| 4932411E22Rik | 0,01  | 0,990894139 | -0,16 | 0,897684193 | -0,11 | 0,909371204 | 0,46  | 0,375934472 | 0,32  | 0,730951829 |
| 4932411N23Rik | 0,25  | 0,729108809 | 0,1   | 0,84966379  | -0,31 | 0,501664412 | -0,3  | 0,661554419 | 0,13  | 0,881943508 |
| 4932412D23Rik | -0,22 | 0,642385552 | -0,14 | 0,790939978 | -0,1  | 0,887998113 | 0,1   | 0,828955037 | -0,03 | 0,975029906 |
| 4932413F04Rik | 0,13  | 0,885303047 | -0,02 | 0,98047115  | 0,07  | 0,913814191 | -0,16 | 0,75485675  | -0,14 | 0,861977667 |
| 4932414J04Rik | 0,38  | 0,434641897 | -0,26 | 0,849511429 | -0,61 | 0,324705558 | 0,13  | 0,886806548 | -0,02 | 0,988369133 |
| 4932414N04Rik | 0,54  | 0,253512837 | -0,33 | 0,724759867 | 0,13  | 0,880706627 | -0,02 | 0,981751892 | -0,31 | 0,698816716 |
| 4932415M13Rik | -0,02 | 0,971586153 | 0,06  | 0,904698551 | -0,27 | 0,590228748 | -0,68 | 0,561781814 | -0,85 | 0,410369443 |
| 4932416H05Rik | -0,35 | 0,687662951 | 0,02  | 0,969481475 | 0,08  | 0,887630371 | -0,12 | 0,735636507 | -0,28 | 0,652971149 |
| 4932416K20Rik | 0,03  | 0,955200574 | 0,1   | 0,823859284 | -0,06 | 0,926974012 | 0,02  | 0,969963471 | 0,23  | 0,716229308 |
| 4932422M17Rik | 0,23  | 0,60280879  | 0,08  | 0,880473303 | -0,25 | 0,705811313 | 0,07  | 0,855036345 | 0,27  | 0,633449435 |
| 4932429P05Rik | 0,27  | 0,596550801 | -0,21 | 0,774463829 | 0,36  | 0,452731181 | 0,22  | 0,588987424 | 0,3   | 0,639451374 |
| 4932430I15Rik | -0,07 | 0,885397656 | 0,04  | 0,940150914 | -0,18 | 0,694298594 | -0,04 | 0,931477012 | -0,12 | 0,874716101 |
| 4932435O22Rik | -0,27 | 0,689991112 | -0,59 | 0,459417799 | 0,19  | 0,775282779 | 0,28  | 0,517178455 | -0,21 | 0,735152891 |
| 4932438A13Rik | 0,58  | 0,179001759 | 0,5   | 0,219055424 | -0,83 | 0,13589176  | -0,12 | 0,792730628 | 0,75  | 0,104257693 |
| 4932438H23Rik | -0,16 | 0,728739942 | -0,01 | 0,994148616 | -0,2  | 0,775964228 | -0,1  | 0,860889912 | -0,18 | 0,806250058 |

|               |       |             |       |             |       |             |       |             |       |             |
|---------------|-------|-------------|-------|-------------|-------|-------------|-------|-------------|-------|-------------|
| 4932441J04Rik | 0,18  | 0,786654245 | 0,21  | 0,789004397 | 0,25  | 0,641439342 | -0,04 | 0,959921588 | 0,16  | 0,884640084 |
| 4932442E05Rik | -0,14 | 0,773899768 | -0,02 | 0,981086576 | -0,16 | 0,751090942 | 0,01  | 0,988441991 | 0,11  | 0,875421436 |
| 4932443I19Rik | -0,17 | 0,778323101 | -0,08 | 0,915282997 | 0,2   | 0,811669636 | -0,07 | 0,878358153 | 0,23  | 0,797167184 |
| 4932443L11Rik | -0,15 | 0,740529913 | -0,48 | 0,594415097 | -0,44 | 0,370554673 | 0,34  | 0,406068033 | 0,01  | 0,991559961 |
| 4932702P03Rik | 0,03  | 0,976574175 | 0,01  | 0,9860901   | -0,19 | 0,827761588 | 0,38  | 0,543475623 | 0,03  | 0,983469081 |
| 4933400A11Rik | -0,24 | 0,596973853 | 0     | 1           | -0,11 | 0,885800676 | 0,05  | 0,914137643 | 0,11  | 0,886328419 |
| 4933400B14Rik | -0,01 | 0,98297164  | 0,06  | 0,892896673 | -0,16 | 0,817818413 | -0,07 | 0,924492971 | -0,02 | 0,981927774 |
| 4933400C23Rik | -0,12 | 0,84357861  | 0,31  | 0,674643073 | -0,34 | 0,501664412 | -0,08 | 0,89300063  | -0,03 | 0,975441362 |
| 4933400F21Rik | 0,17  | 0,793637667 | -0,45 | 0,408512216 | -0,08 | 0,921956183 | -0,02 | 0,984136649 | -0,11 | 0,899196564 |
| 4933400L20Rik | 0,09  | 0,908516629 | -0,13 | 0,82505545  | -0,23 | 0,775282779 | -0,34 | 0,482244044 | 0,13  | 0,875520848 |
| 4933401B06Rik | 0,16  | 0,840515514 | 0,17  | 0,785573503 | 0,09  | 0,916690816 | 0,07  | 0,880011866 | 0,38  | 0,526122398 |
| 4933401D09Rik | 0,12  | 0,793793954 | 0,01  | 0,988550087 | 0,02  | 0,982241391 | 0,32  | 0,387710318 | 0,39  | 0,704150863 |
| 4933401H06Rik | -0,15 | 0,795567544 | -0,22 | 0,586955568 | 0,02  | 0,987356432 | 0,28  | 0,638507554 | -0,17 | 0,844265172 |
| 4933402C06Rik | 0,11  | 0,834744248 | 0,03  | 0,969314504 | -0,07 | 0,922807267 | 0,33  | 0,359799486 | 0,24  | 0,735796038 |
| 4933402D24Rik | 0,01  | 0,997229565 | -0,04 | 0,930192503 | -0,05 | 0,956894731 | 0,06  | 0,887559686 | 0,18  | 0,77360786  |
| 4933402E13Rik | 0,15  | 0,749910873 | 0,19  | 0,784199242 | -0,11 | 0,853040826 | -0,12 | 0,787778344 | -0,19 | 0,844265172 |
| 4933402J07Rik | -0,44 | 0,611339325 | -0,4  | 0,628779499 | -0,09 | 0,922318683 | 0,27  | 0,572854044 | 0,35  | 0,686759431 |
| 4933402J10Rik | 0,13  | 0,766705553 | -0,08 | 0,943915456 | -0,04 | 0,953975807 | 0,05  | 0,921600281 | 0,41  | 0,454357813 |
| 4933402J15Rik | 0,58  | 0,279256257 | 0,06  | 0,919762719 | -0,31 | 0,71649249  | -0,14 | 0,783961371 | -0,03 | 0,973381854 |
| 4933402N03Rik | -0,12 | 0,882027826 | 0,04  | 0,965147491 | 0,06  | 0,925245169 | 0,1   | 0,858956727 | -0,13 | 0,873997452 |
| 4933402P03Rik | 0,19  | 0,787157782 | -0,26 | 0,514781187 | 0,71  | 0,13589176  | 0,07  | 0,870153216 | -0,14 | 0,879075155 |
| 4933403O08Rik | 0,14  | 0,829889828 | -0,09 | 0,917821097 | -0,3  | 0,509127778 | -0,07 | 0,899335603 | 0,2   | 0,787304651 |
| 4933404G15Rik | 0,18  | 0,814888638 | 0     | 1           | -0,04 | 0,957152002 | -0,33 | 0,506761087 | -0,53 | 0,396968694 |
| 4933404K08Rik | 0,32  | 0,491385648 | -0,22 | 0,763299388 | 0,03  | 0,973732268 | 0,1   | 0,849242587 | -0,19 | 0,767669883 |
| 4933404O12Rik | -0,37 | 0,616256614 | 0,15  | 0,837480636 | -0,14 | 0,842022578 | 0,08  | 0,902095386 | -0,32 | 0,746512314 |
| 4933405D12Rik | -0,05 | 0,958821517 | 0,09  | 0,965589332 | -0,07 | 0,957041977 | -0,46 | 0,62733822  | -0,2  | 0,86809582  |
| 4933405E24Rik | 0,02  | 0,976574175 | 0,16  | 0,815973308 | -0,13 | 0,856046789 | 0,08  | 0,830299574 | 0,08  | 0,917710291 |
| 4933405L10Rik | 0,21  | 0,750634506 | 0,52  | 0,474106654 | 0,03  | 0,982813314 | -0,29 | 0,419896928 | -0,16 | 0,846526184 |
| 4933405O20Rik | -0,02 | 0,977336014 | -0,1  | 0,829892665 | 0,24  | 0,617613613 | 0,03  | 0,954905673 | -0,11 | 0,886027227 |
| 4933406C10Rik | 0,39  | 0,701297763 | -0,39 | 0,568282579 | -0,39 | 0,660920525 | 0,43  | 0,451721309 | 0,25  | 0,80155635  |
| 4933406D12Rik | 0,03  | 0,96869339  | -0,08 | 0,930192503 | 0,11  | 0,856046789 | -0,05 | 0,950913753 | -0,21 | 0,767285294 |
| 4933406F09Rik | 0,06  | 0,928435159 | 0,08  | 0,894205636 | -0,06 | 0,931761333 | -0,35 | 0,31057284  | -0,3  | 0,579739537 |
| 4933406G16Rik | -0,04 | 0,95538722  | -0,05 | 0,930253753 | -0,05 | 0,953828271 | -0,27 | 0,767568252 | -0,36 | 0,589271906 |
| 4933406I18Rik | -0,17 | 0,714127381 | -0,08 | 0,930849936 | -0,02 | 0,974887915 | -0,08 | 0,840946891 | 0,03  | 0,97507737  |
| 4933406J08Rik | 0,76  | 0,22556036  | -0,18 | 0,909735125 | 0,24  | 0,806102885 | 0,56  | 0,422508427 | 0,08  | 0,955910202 |

|               |       |             |       |             |       |             |       |             |       |             |
|---------------|-------|-------------|-------|-------------|-------|-------------|-------|-------------|-------|-------------|
| 4933406J10Rik | 0,46  | 0,305893528 | 0,24  | 0,672416139 | -0,06 | 0,944266382 | 0,02  | 0,974813898 | -0,04 | 0,961780852 |
| 4933406K04Rik | -0,17 | 0,829299665 | -0,32 | 0,646170664 | -0,32 | 0,660920525 | 0,05  | 0,952133471 | 0,09  | 0,932846086 |
| 4933406M09Rik | 0,81  | 0,356810943 | 0,66  | 0,51825831  | 0,01  | 0,995669314 | -0,72 | 0,192164723 | -0,11 | 0,917844354 |
| 4933406P04Rik | -0,06 | 0,941798404 | 0,6   | 0,37605316  | -0,1  | 0,937096585 | -0,53 | 0,222359759 | 0,42  | 0,583279373 |
| 4933407E24Rik | 0,1   | 0,874676538 | 0,09  | 0,853569707 | -0,08 | 0,904057901 | 0,15  | 0,691668858 | 0,26  | 0,601481833 |
| 4933407G14Rik | 0,22  | 0,735086653 | -0,12 | 0,785573503 | -0,3  | 0,578720052 | 0,16  | 0,667513021 | 0,11  | 0,883885544 |
| 4933407I05Rik | 0,23  | 0,756541917 | -0,09 | 0,855632384 | -0,27 | 0,725314316 | -0,13 | 0,836891857 | -0,18 | 0,851207222 |
| 4933407I08Rik | -0,12 | 0,807062435 | 0,23  | 0,582478031 | 0,04  | 0,958851839 | 0,01  | 0,988205241 | 0,1   | 0,889954957 |
| 4933407I18Rik | -0,02 | 0,990162934 | 0     | 1           | 0,2   | 0,844191447 | 0,07  | 0,873610553 | 0,25  | 0,731865047 |
| 4933407K13Rik | -0,4  | 0,59648949  | -0,59 | 0,310525594 | -0,01 | 0,997220401 | 0,53  | 0,228907634 | 0,53  | 0,336646728 |
| 4933407L21Rik | 0,5   | 0,235108656 | 0,49  | 0,582502577 | 0,02  | 0,991240121 | 2,57  | 0,030723399 | -0,82 | 0,665054064 |
| 4933408B17Rik | 0,08  | 0,914090929 | 0,38  | 0,61193546  | -0,07 | 0,933880691 | -0,26 | 0,71429877  | -0,04 | 0,977991682 |
| 4933408J17Rik | 0,05  | 0,927080959 | -0,14 | 0,807175471 | -0,11 | 0,874098993 | 0,18  | 0,616012245 | -0,11 | 0,872242794 |
| 4933408N05Rik | -0,08 | 0,870052902 | -0,12 | 0,869444586 | -0,15 | 0,815942732 | 0,23  | 0,549014569 | 0,05  | 0,948163009 |
| 4933409D19Rik | 0,2   | 0,61023876  | 0,06  | 0,934294134 | -0,09 | 0,904057901 | 0,19  | 0,635482645 | -0,09 | 0,89761151  |
| 4933409G03Rik | 0,07  | 0,955999577 | 0,35  | 0,730794426 | 0,46  | 0,505038995 | -0,25 | 0,692732236 | -0,01 | 0,9939542   |
| 4933409K07Rik | 0,17  | 0,702313432 | -0,44 | 0,495742596 | 0,26  | 0,773365699 | 0,06  | 0,906329012 | -0,25 | 0,825518917 |
| 4933411E08Rik | -0,14 | 0,777131306 | -0,28 | 0,677026666 | -0,05 | 0,955257293 | 0,15  | 0,839567244 | -0,1  | 0,922921816 |
| 4933411G06Rik | -0,05 | 0,946792769 | 0,07  | 0,930849936 | 0,11  | 0,898935616 | -0,19 | 0,706937999 | -0,12 | 0,907285011 |
| 4933411K16Rik | 0,14  | 0,762299052 | -0,29 | 0,619501651 | 0,28  | 0,736630059 | 0,28  | 0,539032331 | 0,12  | 0,881613493 |
| 4933411O13Rik | 0,24  | 0,766541178 | 0,03  | 0,959673534 | 0,05  | 0,974202294 | -0,25 | 0,617822539 | -0,07 | 0,952296554 |
| 4933412E12Rik | 1,14  | 0,11435382  | 1,03  | 0,087315688 | -1,51 | 0,044715282 | 0,18  | 0,785121965 | 1,44  | 0,021111626 |
| 4933412E24Rik | -0,08 | 0,867664049 | 0,03  | 0,958515609 | 0     | 0,997581017 | 0,05  | 0,920828834 | -0,13 | 0,893064058 |
| 4933412O06Rik | 0,36  | 0,717407143 | 0,05  | 0,948314657 | -0,1  | 0,911506558 | 0,12  | 0,853463459 | 0,04  | 0,977707446 |
| 4933413C19Rik | 0,14  | 0,7830424   | -0,16 | 0,763796207 | -0,24 | 0,828643779 | 0,12  | 0,785589543 | -0,12 | 0,865258929 |
| 4933413G19Rik | -0,4  | 0,322531238 | 0,15  | 0,898952381 | 0,01  | 0,99416325  | -0,28 | 0,665890635 | 0,23  | 0,876418697 |
| 4933413J09Rik | 0,42  | 0,521669024 | -0,26 | 0,622499716 | -0,11 | 0,853756449 | 0,01  | 0,986287953 | -0,17 | 0,836061657 |
| 4933413L06Rik | 0,12  | 0,877581958 | -0,32 | 0,641792237 | -0,01 | 0,993379272 | -0,02 | 0,973326391 | -0,11 | 0,878471553 |
| 4933414I15Rik | -0,06 | 0,9183905   | 0,29  | 0,568304052 | -0,1  | 0,89935302  | 0,01  | 0,986427508 | -0,06 | 0,947568028 |
| 4933415A04Rik | -0,3  | 0,720783705 | 0,04  | 0,988922072 | 0,05  | 0,970913247 | -0,39 | 0,771874401 | -0,69 | 0,653769438 |
| 4933415F23Rik | -0,16 | 0,793209485 | -0,05 | 0,945143056 | -0,25 | 0,657150555 | 0,12  | 0,803625091 | 0,36  | 0,557898588 |
| 4933416C03Rik | -0,04 | 0,928944712 | -0,32 | 0,622603765 | -0,01 | 0,993379272 | 0,29  | 0,607090688 | 0,09  | 0,940438527 |
| 4933416E03Rik | -0,03 | 0,964086001 | -0,21 | 0,86245211  | -0,24 | 0,752196529 | -0,13 | 0,85301747  | -0,16 | 0,850105869 |
| 4933416E14Rik | 0,13  | 0,820460368 | 0,05  | 0,912137323 | 0,01  | 0,99129124  | 0,12  | 0,798665923 | 0,08  | 0,922781074 |
| 4933416I08Rik | 0,7   | 0,187534389 | -0,09 | 0,932338539 | 0,12  | 0,922807267 | 0,18  | 0,753045394 | -0,42 | 0,616680786 |

|               |       |             |       |             |       |             |       |             |       |             |
|---------------|-------|-------------|-------|-------------|-------|-------------|-------|-------------|-------|-------------|
| 4933416M06Rik | 0,17  | 0,791297234 | -0,07 | 0,92856048  | -0,31 | 0,73501607  | 0,42  | 0,486912097 | -0,13 | 0,886027227 |
| 4933416M07Rik | -0,01 | 0,991919022 | -0,02 | 0,989873399 | -0,33 | 0,582669192 | -0,21 | 0,664315959 | 0,11  | 0,9162287   |
| 4933416O17Rik | 0,18  | 0,761425175 | 0     | 0,998513452 | -0,2  | 0,71856412  | 0,1   | 0,800447608 | 0,08  | 0,921720089 |
| 4933417A18Rik | -0,02 | 0,975949545 | -0,14 | 0,810635763 | 0,11  | 0,883173062 | 0,1   | 0,795215066 | 0,19  | 0,73865672  |
| 4933417D19Rik | -0,11 | 0,843671042 | -0,29 | 0,565639972 | 0,04  | 0,953699244 | 0,1   | 0,806596364 | 0,22  | 0,765809384 |
| 4933417E11Rik | 0,45  | 0,377372764 | -0,24 | 0,781665479 | -0,26 | 0,69669808  | 0,29  | 0,38317051  | 0,35  | 0,639785525 |
| 4933417G07Rik | 0,01  | 0,9832678   | 0,42  | 0,511804764 | -0,6  | 0,417464557 | -0,24 | 0,571327126 | 0,17  | 0,786813214 |
| 4933417O13Rik | -0,01 | 0,993728727 | -0,23 | 0,682821791 | 0,13  | 0,838289412 | 0,37  | 0,466493746 | -0,21 | 0,852757557 |
| 4933421A08Rik | -0,12 | 0,820273676 | 0,01  | 0,985151214 | -0,36 | 0,446493846 | -0,07 | 0,884352208 | 0,21  | 0,814098688 |
| 4933421I07Rik | 0,01  | 0,991919022 | 0,01  | 0,987162042 | 0,17  | 0,791940256 | -0,13 | 0,777533468 | -0,22 | 0,742982183 |
| 4933421O10Rik | 0,1   | 0,810129283 | -0,17 | 0,743861199 | -0,09 | 0,902403617 | 0,13  | 0,711746438 | -0,1  | 0,904636459 |
| 4933422A05Rik | -0,3  | 0,783672142 | -0,41 | 0,903504389 | 0,3   | 0,700439997 | 1,2   | 0,306583276 | 0,24  | 0,848977077 |
| 4933423P22Rik | 0,09  | 0,935203545 | -0,12 | 0,88741189  | 0,01  | 0,992201196 | 0,22  | 0,521206029 | 0,18  | 0,755533447 |
| 4933424G05Rik | -0,14 | 0,839375532 | -0,12 | 0,857531371 | -0,09 | 0,935978536 | 0,14  | 0,886903189 | 0,45  | 0,562557824 |
| 4933424G06Rik | 0,2   | 0,686076441 | 0,06  | 0,934294134 | -0,09 | 0,939153693 | 0,27  | 0,583295223 | 0,13  | 0,879165851 |
| 4933424L21Rik | -0,17 | 0,693610566 | 0,18  | 0,777136304 | -0,16 | 0,80546411  | -0,13 | 0,725169198 | 0,01  | 0,992607235 |
| 4933424M12Rik | -0,55 | 0,506476054 | -1,03 | 0,107449087 | -0,16 | 0,828643779 | 1,22  | 0,012175785 | 0,1   | 0,890957032 |
| 4933425L06Rik | -0,04 | 0,969486005 | 0,13  | 0,899496232 | -0,17 | 0,750624323 | -0,09 | 0,915691108 | 0,14  | 0,912022175 |
| 4933426K07Rik | 0,09  | 0,869225685 | 0,08  | 0,861862086 | -0,13 | 0,813104232 | 0,01  | 0,982534991 | -0,05 | 0,955784619 |
| 4933427D06Rik | 0,1   | 0,833275012 | 0,15  | 0,802616913 | -0,03 | 0,974299326 | 0,14  | 0,77523305  | 0,08  | 0,939448119 |
| 4933427D14Rik | -0,15 | 0,90742841  | -0,07 | 0,941811651 | 0,16  | 0,855523214 | 0,09  | 0,920767405 | -0,07 | 0,968134101 |
| 4933427E11Rik | -0,11 | 0,806353432 | -0,02 | 0,981914565 | 0,1   | 0,865361912 | -0,06 | 0,891584797 | -0,1  | 0,885777129 |
| 4933427E13Rik | -0,16 | 0,783200207 | -0,31 | 0,804868131 | -0,01 | 0,993379272 | 0,02  | 0,978782666 | -0,02 | 0,981913783 |
| 4933427G17Rik | -0,31 | 0,630710347 | -0,1  | 0,902830091 | 0,33  | 0,716352322 | -0,87 | 0,717367013 | -0,92 | 0,716659497 |
| 4933427I04Rik | -0,05 | 0,944291635 | 0,18  | 0,842663656 | -0,07 | 0,925417014 | 0,03  | 0,971062704 | 0,16  | 0,809875334 |
| 4933427I22Rik | 0,34  | 0,397787626 | -0,17 | 0,86245211  | 0,14  | 0,838718162 | 0,03  | 0,960547981 | -0,06 | 0,948163009 |
| 4933427J07Rik | 0,07  | 0,889776123 | -0,18 | 0,696329013 | -0,09 | 0,909233941 | 0,17  | 0,71158821  | -0,12 | 0,906876904 |
| 4933428C19Rik | 0,03  | 0,972720447 | 0,68  | 0,140858993 | -0,26 | 0,57717258  | -0,23 | 0,55067293  | -0,17 | 0,792305774 |
| 4933428G20Rik | 0,17  | 0,856984761 | -0,11 | 0,910203909 | -0,35 | 0,435556279 | 0,86  | 0,05386085  | 0,17  | 0,844265172 |
| 4933428M09Rik | 0,18  | 0,802029256 | -0,11 | 0,87075785  | -0,05 | 0,949334141 | -0,21 | 0,685309997 | 0     | 0,996614425 |
| 4933429K18Rik | -0,03 | 0,964272364 | 0,06  | 0,978904487 | -0,24 | 0,725191296 | 0,11  | 0,782026274 | -0,4  | 0,469148703 |
| 4933429O19Rik | 0,22  | 0,683531628 | 0,15  | 0,891533665 | -0,04 | 0,953951069 | -0,62 | 0,132361628 | -0,32 | 0,566248044 |
| 4933430H16Rik | 0,03  | 0,970463755 | -0,16 | 0,770136737 | -0,14 | 0,791955135 | 0,08  | 0,85301747  | -0,01 | 0,988214203 |
| 4933430I17Rik | 0,16  | 0,841086941 | -0,26 | 0,745130453 | -0,05 | 0,971479752 | -0,29 | 0,648160347 | -0,44 | 0,753328965 |
| 4933430M04Rik | 0,09  | 0,928103232 | -0,35 | 0,680709276 | 0,01  | 0,990836784 | 0,09  | 0,8914104   | 0,14  | 0,832848337 |

|               |       |             |       |             |       |             |       |             |       |             |
|---------------|-------|-------------|-------|-------------|-------|-------------|-------|-------------|-------|-------------|
| 4933430N04Rik | -0,01 | 0,984972115 | -0,1  | 0,850282029 | -0,07 | 0,912578398 | -0,19 | 0,722766722 | 0     | 0,999363756 |
| 4933431E20Rik | 0,15  | 0,733658446 | 0,2   | 0,754470335 | 0,05  | 0,953074345 | 0,21  | 0,504625503 | 0,55  | 0,412193279 |
| 4933431G14Rik | -0,09 | 0,867243066 | 0,48  | 0,688559379 | -0,03 | 0,9780054   | 0,17  | 0,736730464 | 0,63  | 0,223717572 |
| 4933431K23Rik | 0,1   | 0,885454906 | 0,21  | 0,738762579 | 0,17  | 0,842022578 | 0,21  | 0,679886975 | 0,49  | 0,408816602 |
| 4933432G23Rik | 0,15  | 0,841140165 | 0,19  | 0,678357594 | -0,21 | 0,818765944 | -0,02 | 0,983166423 | 0,33  | 0,664512023 |
| 4933432I03Rik | 0,31  | 0,793209485 | 0,05  | 0,973541589 | -0,63 | 0,477461651 | 0,06  | 0,902632056 | -0,4  | 0,518593772 |
| 4933432I09Rik | 0,58  | 0,494679097 | -0,23 | 0,767178812 | -0,12 | 0,855381787 | -0,67 | 0,581161639 | -1,1  | 0,34327492  |
| 4933432K03Rik | 0,12  | 0,791295946 | -0,24 | 0,670629152 | 0,32  | 0,751090942 | 0,07  | 0,882715112 | -0,11 | 0,874829878 |
| 4933433C11Rik | 0,35  | 0,764288636 | -0,1  | 0,970832543 | -0,9  | 0,383161457 | -1,78 | 0,037061245 | -0,31 | 0,78512653  |
| 4933433F19Rik | 0,09  | 0,882119027 | -0,22 | 0,79122505  | -0,14 | 0,834979811 | 0,41  | 0,33965898  | 0,32  | 0,562960086 |
| 4933433G08Rik | 0,14  | 0,751552741 | -0,05 | 0,930242005 | -0,08 | 0,891482131 | 0,02  | 0,973754184 | 0,01  | 0,989665382 |
| 4933433G15Rik | 0,42  | 0,571404655 | 0,49  | 0,693345761 | -0,4  | 0,676418104 | -0,15 | 0,829591443 | 0,62  | 0,291856934 |
| 4933433G19Rik | -0,09 | 0,92251864  | -0,34 | 0,604972798 | -0,15 | 0,835677021 | 0,28  | 0,678116565 | 0,04  | 0,973576804 |
| 4933433H22Rik | -0,24 | 0,66273792  | -0,13 | 0,874448335 | -0,16 | 0,854115638 | 0,24  | 0,566653262 | 0,3   | 0,708898543 |
| 4933434E20Rik | 0,03  | 0,969486005 | -0,03 | 0,986013411 | -0,03 | 0,988395474 | 0,41  | 0,655788245 | 0,24  | 0,860591136 |
| 4933434M16Rik | 0,25  | 0,738169244 | 0,12  | 0,820806352 | -0,39 | 0,580049353 | -0,16 | 0,721603753 | -0,16 | 0,814438115 |
| 4933435F18Rik | 0,09  | 0,853594835 | 0,16  | 0,709432782 | 0,02  | 0,987003605 | 0,12  | 0,764489444 | 0,22  | 0,728388857 |
| 4933436E23Rik | 0,49  | 0,468111704 | 0,46  | 0,485712513 | 0,13  | 0,876684089 | -0,1  | 0,849421375 | 0,62  | 0,266832581 |
| 4933436H12Rik | 0,45  | 0,270816598 | -0,02 | 0,970762922 | -0,24 | 0,629520505 | 0,14  | 0,768796094 | 0,24  | 0,762105118 |
| 4933436I01Rik | -0,22 | 0,654060539 | 0,09  | 0,897574732 | -0,37 | 0,456499094 | -0,2  | 0,71158821  | -0,35 | 0,58512161  |
| 4933438A12Rik | 0,12  | 0,81630789  | 0,33  | 0,781665479 | 0,25  | 0,709885771 | 0,2   | 0,698921024 | -0,14 | 0,881943508 |
| 4933438B17Rik | 0,22  | 0,824728873 | 0,25  | 0,795638071 | -0,32 | 0,770526999 | 0,03  | 0,975687196 | 0,14  | 0,907903208 |
| 4933438K21Rik | 0,14  | 0,728643996 | -0,04 | 0,945012055 | 0,21  | 0,704122998 | 0,02  | 0,967866794 | 0     | 0,99888749  |
| 4933439C10Rik | 0,11  | 0,921722224 | 0,2   | 0,742131414 | 0,78  | 0,448143106 | 0,79  | 0,418317818 | -0,61 | 0,587915673 |
| 4933439G19Rik | 0,08  | 0,943079514 | 0,04  | 0,961149754 | 0,01  | 0,993379272 | -0,38 | 0,688152796 | -0,59 | 0,48288529  |
| 4933439K11Rik | 0,48  | 0,378598836 | -0,39 | 0,666450149 | -0,14 | 0,867543859 | -0,15 | 0,700603284 | -0,28 | 0,647258599 |
| 4933440J02Rik | 0,08  | 0,909060375 | -0,26 | 0,488817827 | -0,31 | 0,6410789   | 0,19  | 0,571829331 | 0,07  | 0,9281639   |
| 4933440M02Rik | -0,2  | 0,869225685 | -0,32 | 0,837035571 | 0,02  | 0,987390039 | -0,27 | 0,908141892 | 0,49  | 0,701874538 |
| 4933440N22Rik | 0,12  | 0,835208982 | -0,01 | 0,994658805 | -0,2  | 0,79541037  | 0,07  | 0,861506076 | 0,31  | 0,592505698 |
| 5031410I06Rik | 0,32  | 0,564943427 | 0,1   | 0,910184435 | -0,21 | 0,688187934 | -0,33 | 0,612909689 | -0,08 | 0,942935749 |
| 5031414D18Rik | -0,19 | 0,764189777 | 0,07  | 0,949561659 | 0,04  | 0,973802765 | 0,07  | 0,940948462 | 0,19  | 0,871038748 |
| 5031415H12Rik | 1,15  | 0,04197452  | 0,6   | 0,459231649 | 0,31  | 0,844191447 | 0,94  | 0,154672674 | -0,52 | 0,55605211  |
| 5031425E22Rik | -0,09 | 0,849354728 | -0,07 | 0,877913067 | -0,18 | 0,823705452 | -0,25 | 0,642906557 | -0,04 | 0,975441362 |
| 5031425F14Rik | -0,21 | 0,824390658 | 0,07  | 0,887493001 | -0,41 | 0,532868478 | -0,21 | 0,547681234 | 0     | 0,999572304 |
| 5031426D15Rik | 0,08  | 0,886389404 | -0,15 | 0,703291096 | -0,17 | 0,777918093 | 0,08  | 0,828125777 | 0     | 0,996627573 |

|               |       |             |       |             |       |             |       |             |       |             |
|---------------|-------|-------------|-------|-------------|-------|-------------|-------|-------------|-------|-------------|
| 5031434C07Rik | 0,35  | 0,449740126 | 0,04  | 0,989873399 | 0,36  | 0,501664412 | -0,79 | 0,306016644 | 0,07  | 0,952971656 |
| 5031434O11Rik | -0,64 | 0,458591721 | -0,51 | 0,537678815 | -0,96 | 0,340237423 | -1,55 | 0,441190012 | 0,62  | 0,843383597 |
| 5031439G07Rik | -0,41 | 0,474293292 | -0,26 | 0,532181703 | 0,04  | 0,975448682 | -0,23 | 0,804335789 | -0,39 | 0,695575424 |
| 5033403F01Rik | 0,28  | 0,70137787  | 0,24  | 0,628779499 | -0,29 | 0,747767515 | -0,28 | 0,73327254  | 0,59  | 0,399414645 |
| 5033403H07Rik | -0,05 | 0,954510692 | -0,23 | 0,671319666 | 0,36  | 0,649733839 | 0,2   | 0,642212952 | -0,39 | 0,600332767 |
| 5033404E19Rik | -0,14 | 0,762765215 | -0,02 | 0,982378957 | -0,06 | 0,936059691 | 0,03  | 0,95296745  | 0,02  | 0,983613958 |
| 5033406O09Rik | -0,34 | 0,639478916 | 0     | 0,999692079 | 0,05  | 0,950862176 | 0,56  | 0,41819556  | -0,2  | 0,889620489 |
| 5033417F24Rik | 0,07  | 0,909885273 | -0,1  | 0,87892334  | 0,05  | 0,944078985 | 0,09  | 0,907550485 | -0,03 | 0,979152939 |
| 5033428I22Rik | -0,01 | 0,995850917 | 0,01  | 0,994376785 | -0,54 | 0,260131517 | 0,07  | 0,932315462 | -0,14 | 0,9281639   |
| 5033430I15Rik | 0,08  | 0,899079341 | 0,08  | 0,878334357 | -0,09 | 0,925406374 | 0     | 1           | 0,12  | 0,910829332 |
| 5330411J11Rik | -0,02 | 0,983663467 | -0,38 | 0,673912079 | -0,06 | 0,957152002 | 0,27  | 0,451761058 | -0,32 | 0,626176831 |
| 5330413P13Rik | 0,12  | 0,844095084 | -0,38 | 0,792434435 | 0,09  | 0,932063061 | 0,32  | 0,340577298 | 0,07  | 0,945776926 |
| 5330416C01Rik | -0,16 | 0,747914748 | -0,13 | 0,836568137 | -0,24 | 0,725191296 | 0,41  | 0,41499679  | -0,11 | 0,931519966 |
| 5330417C22Rik | -0,26 | 0,639478916 | 0,01  | 0,988550087 | 0,11  | 0,918441706 | -0,11 | 0,896599656 | -0,51 | 0,497446382 |
| 5330417H12Rik | -0,08 | 0,849571502 | 0,16  | 0,883145635 | -0,22 | 0,749607234 | -0,06 | 0,961123444 | -0,07 | 0,934398907 |
| 5330427O13Rik | 0,17  | 0,770347758 | -0,05 | 0,932292974 | 0,1   | 0,863043834 | -0,05 | 0,943143586 | -0,05 | 0,969617491 |
| 5330429C05Rik | -0,13 | 0,810879711 | 0,11  | 0,840864779 | -0,31 | 0,529883113 | 0,01  | 0,99282298  | 0,05  | 0,967747124 |
| 5330432E05Rik | 0,07  | 0,898603809 | -0,07 | 0,881339866 | -0,2  | 0,74662944  | 0,03  | 0,957345393 | 0,15  | 0,844842508 |
| 5330434G04Rik | 0,31  | 0,368250771 | 0,27  | 0,752804236 | -0,1  | 0,910766724 | -0,47 | 0,45691565  | -0,34 | 0,62728046  |
| 5330438D12Rik | -0,01 | 0,997202263 | -0,14 | 0,774567202 | 0,11  | 0,907606546 | -0,2  | 0,662587743 | -0,09 | 0,939948423 |
| 5330439A09Rik | 0,16  | 0,778869381 | 0,25  | 0,789051952 | 0,05  | 0,948637233 | 0,2   | 0,710917023 | 0,06  | 0,953297732 |
| 5330439B14Rik | -0,08 | 0,857602647 | 0,29  | 0,45420995  | 0,01  | 0,989491273 | -0,09 | 0,828586564 | 0     | 0,994980093 |
| 5330439K02Rik | 0,11  | 0,902939265 | -0,06 | 0,905051067 | -0,32 | 0,727262258 | -0,06 | 0,89150663  | 0,12  | 0,925858284 |
| 5430400D12Rik | 0,21  | 0,683531628 | -0,04 | 0,956145324 | 0,04  | 0,966414094 | -0,21 | 0,624759661 | -0,09 | 0,905581898 |
| 5430401F13Rik | 0,84  | 0,343763562 | 0,14  | 0,915358263 | 0,38  | 0,655046595 | -0,09 | 0,928315881 | 0,49  | 0,671441327 |
| 5430401H09Rik | 0,18  | 0,704646948 | -0,07 | 0,887752277 | -0,18 | 0,733423502 | 0,04  | 0,920036779 | -0,01 | 0,991559961 |
| 5430402E10Rik | -0,38 | 0,480721497 | 0,16  | 0,740590062 | 0,09  | 0,894018349 | -0,02 | 0,976330091 | 0,2   | 0,861056054 |
| 5430402O13Rik | 0,07  | 0,884230844 | -0,05 | 0,915213759 | -0,2  | 0,675674731 | 0,4   | 0,31536212  | 0,23  | 0,721148879 |
| 5430403N17Rik | 0,03  | 0,971302729 | -0,18 | 0,722938629 | 0,13  | 0,867126357 | 0,03  | 0,975819972 | 0,09  | 0,933390378 |
| 5430405H02Rik | 0,19  | 0,665460488 | -0,26 | 0,606866408 | -0,46 | 0,31338379  | -0,13 | 0,774826947 | 0,06  | 0,956585095 |
| 5430416N02Rik | 0,13  | 0,774822327 | -0,04 | 0,9381453   | -0,06 | 0,944078985 | 0,21  | 0,532957431 | 0,43  | 0,383178627 |
| 5430416O09Rik | 0,1   | 0,922988869 | -0,25 | 0,752804236 | -0,33 | 0,688373708 | -2,06 | 0,011231663 | -0,53 | 0,338128716 |
| 5430419D17Rik | 0,34  | 0,54401985  | 0,07  | 0,972706967 | -0,3  | 0,783006    | 0,45  | 0,185569123 | 0,22  | 0,774885677 |
| 5430421F17Rik | 0,11  | 0,870145675 | 0,13  | 0,912137323 | 0,1   | 0,888101179 | 0,43  | 0,522155259 | 0,37  | 0,720844381 |
| 5430421N21Rik | -0,2  | 0,818079591 | -0,26 | 0,842663656 | -1,04 | 0,085429661 | 0,11  | 0,947028438 | 0,16  | 0,939448119 |



|               |       |             |       |             |       |             |       |             |       |             |
|---------------|-------|-------------|-------|-------------|-------|-------------|-------|-------------|-------|-------------|
| 5430427M07Rik | 0,11  | 0,914180919 | -0,11 | 0,954866231 | 0,48  | 0,616398569 | -0,23 | 0,78049009  | -0,12 | 0,879075155 |
| 5430427O19Rik | 0,28  | 0,718369124 | 0,16  | 0,796669003 | 0,26  | 0,667037569 | 0,32  | 0,61015424  | -0,04 | 0,977212067 |
| 5430428K19Rik | -0,3  | 0,575887113 | -0,35 | 0,561928606 | 0,06  | 0,932866273 | 0,31  | 0,376988783 | 0,35  | 0,474179271 |
| 5430434I15Rik | 0,34  | 0,554519131 | 0,07  | 0,969019461 | 0,36  | 0,544227041 | 0,82  | 0,11232717  | 0,33  | 0,738901324 |
| 5430437J10Rik | 0,32  | 0,593510013 | 0,07  | 0,93163271  | -0,27 | 0,679339536 | -0,26 | 0,575492019 | 0,19  | 0,765342998 |
| 5430440P10Rik | 0,41  | 0,272619186 | 0,01  | 0,983071427 | -0,29 | 0,662451176 | -0,18 | 0,733638583 | -0,07 | 0,939948423 |
| 5530400C23Rik | -0,05 | 0,922118639 | -0,11 | 0,81505161  | -0,2  | 0,791814863 | 0,14  | 0,778773256 | -0,22 | 0,765419939 |
| 5530401A14Rik | -0,01 | 0,991516118 | -0,15 | 0,896448954 | -0,1  | 0,89004987  | -0,1  | 0,87348536  | 0,17  | 0,821140509 |
| 5530601H04Rik | -0,29 | 0,749209475 | 0,39  | 0,643182627 | -0,56 | 0,427329305 | -0,02 | 0,983166423 | 0,06  | 0,958259949 |
| 5730403I07Rik | 0,61  | 0,237286068 | 0,23  | 0,677026666 | -0,07 | 0,940489823 | -0,26 | 0,492852061 | -0,25 | 0,680340254 |
| 5730405O15Rik | -0,22 | 0,752042687 | 0,7   | 0,367968212 | 0,09  | 0,934206194 | -1,09 | 0,100777201 | 0,04  | 0,977599806 |
| 5730408K05Rik | -0,49 | 0,172698611 | -0,39 | 0,496223407 | 0,29  | 0,744122364 | 0,59  | 0,598024603 | 0,77  | 0,457522975 |
| 5730409E04Rik | -0,79 | 0,163088889 | -0,52 | 0,732044571 | 0,26  | 0,813180174 | 0,25  | 0,448670175 | -0,4  | 0,442579293 |
| 5730409K12Rik | -0,13 | 0,757940032 | -0,08 | 0,873628464 | 0,09  | 0,870377336 | 0     | 0,994512187 | -0,38 | 0,548884611 |
| 5730412P04Rik | 0,89  | 0,150740163 | -0,16 | 0,707524747 | -0,3  | 0,57717258  | 0,05  | 0,957674095 | 0,17  | 0,764679653 |
| 5730416F02Rik | -0,3  | 0,613387484 | -0,2  | 0,715688609 | -0,2  | 0,86459621  | 0,1   | 0,864379203 | 0,07  | 0,954694993 |
| 5730420D15Rik | 0,36  | 0,673291416 | -0,17 | 0,748345069 | 0,52  | 0,665034403 | 0,26  | 0,69151142  | 0,09  | 0,939948423 |
| 5730422E09Rik | 0,02  | 0,983564276 | 0,01  | 0,989873399 | 0,1   | 0,880645887 | -0,17 | 0,698459607 | -0,03 | 0,977421828 |
| 5730435O14Rik | 0,11  | 0,801386084 | 0,18  | 0,732847182 | -0,39 | 0,404120029 | -0,02 | 0,979509623 | 0,18  | 0,823098095 |
| 5730437C11Rik | 0,09  | 0,884190046 | 0,03  | 0,963631809 | -0,22 | 0,693619157 | 0,09  | 0,81096279  | 0,21  | 0,710368081 |
| 5730455P16Rik | 0,32  | 0,711274014 | 0,33  | 0,682189381 | 0,14  | 0,904057901 | -0,42 | 0,18825829  | -0,03 | 0,978972169 |
| 5730457N03Rik | -0,18 | 0,701391957 | 0     | 1           | -0,43 | 0,481504499 | 0,52  | 0,254784646 | 0,12  | 0,873357312 |
| 5730460C07Rik | 0,1   | 0,925195044 | 0,13  | 0,84786877  | -0,08 | 0,939479315 | -0,39 | 0,464698596 | 0,04  | 0,973162988 |
| 5730480H06Rik | 0,45  | 0,533189619 | 0,18  | 0,838368852 | 0,05  | 0,982449079 | -0,42 | 0,725722347 | -0,53 | 0,731865047 |
| 5730507C01Rik | 0,18  | 0,701624105 | 0,48  | 0,847189568 | 0,1   | 0,956894731 | 1,02  | 0,112298858 | -0,09 | 0,933741854 |
| 5730508B09Rik | 0,75  | 0,076026669 | 0,95  | 0,135303558 | -0,23 | 0,809062815 | 0,72  | 0,229859806 | 1,03  | 0,094398721 |
| 5730522E02Rik | -0,23 | 0,805438081 | 0,35  | 0,752804236 | 0,29  | 0,697080187 | -0,13 | 0,841834974 | -0,39 | 0,608004947 |
| 5730559C18Rik | 0,53  | 0,29417186  | -0,12 | 0,855632384 | 0,06  | 0,953951069 | -0,21 | 0,680245242 | -0,33 | 0,578675445 |
| 5730596B20Rik | -0,37 | 0,683399093 | 0,17  | 0,870989562 | 0,13  | 0,847506224 | 0,14  | 0,846112956 | -0,33 | 0,650015281 |
| 5830411N06Rik | 0,19  | 0,758636946 | -0,01 | 0,992365556 | -0,32 | 0,740611352 | 0,25  | 0,833013516 | 0,08  | 0,966951657 |
| 5830416I19Rik | -0,14 | 0,799493751 | 0,05  | 0,94576641  | 0,13  | 0,917637235 | 0,23  | 0,610149813 | 0,08  | 0,925574673 |
| 5830417I10Rik | 0,21  | 0,769138738 | 0,12  | 0,882589938 | 1,18  | 0,533023142 | -0,09 | 0,908723463 | -0,51 | 0,43487403  |
| 5830418P13Rik | 0,1   | 0,840654169 | 0     | 1           | -0,03 | 0,977967694 | -0,3  | 0,674665764 | 0,06  | 0,97425848  |
| 5830428M24Rik | 0,15  | 0,7830424   | 0,28  | 0,770521007 | -0,57 | 0,436827113 | -0,28 | 0,517354168 | -0,29 | 0,688610532 |
| 5830432E09Rik | 0,2   | 0,740529913 | -0,19 | 0,716668427 | -0,64 | 0,48758342  | 0,11  | 0,866757253 | 0,57  | 0,349292788 |

|               |       |             |       |             |       |             |       |             |       |             |
|---------------|-------|-------------|-------|-------------|-------|-------------|-------|-------------|-------|-------------|
| 5830444B04Rik | 0,29  | 0,660482793 | -0,17 | 0,837480636 | -0,29 | 0,800142198 | 0,27  | 0,600327117 | 0,52  | 0,770810685 |
| 5830454E08Rik | 0,57  | 0,474777426 | -0,01 | 0,989873399 | 0,27  | 0,60719027  | -1,02 | 0,074454367 | -0,77 | 0,385014622 |
| 5830462I19Rik | 0,19  | 0,741385133 | 0,59  | 0,378400442 | 0,13  | 0,873046397 | -0,5  | 0,379728504 | 0,13  | 0,929312654 |
| 5830472F04Rik | 0,41  | 0,704641551 | 0,07  | 0,934294134 | -1,33 | 0,508055997 | -0,93 | 0,144473977 | 0,48  | 0,59665978  |
| 5830473C10Rik | -0,02 | 0,978215049 | 0,16  | 0,800821935 | 0,02  | 0,979791644 | 0,18  | 0,762182866 | 0,6   | 0,368554903 |
| 5930403L14Rik | -0,02 | 0,971963261 | 0,05  | 0,923044405 | -0,39 | 0,3483474   | -0,73 | 0,11232717  | 0,05  | 0,953297732 |
| 5930412G12Rik | 0,28  | 0,800851935 | -0,22 | 0,722601778 | -0,05 | 0,971087234 | -0,16 | 0,83280418  | -0,18 | 0,865258929 |
| 5930422O12Rik | 0,3   | 0,764288636 | 0,12  | 0,915293265 | -0,3  | 0,533790057 | -0,61 | 0,563332477 | -0,04 | 0,983617617 |
| 5930430L01Rik | -0,09 | 0,910199365 | 0,12  | 0,873446866 | -0,27 | 0,82622365  | -1,11 | 0,095449678 | -0,38 | 0,64934615  |
| 5930438M14Rik | -0,12 | 0,895278749 | -0,22 | 0,614530823 | 0,06  | 0,939885989 | 0,06  | 0,932834598 | 0,18  | 0,840952901 |
| 6030407O03Rik | -0,35 | 0,500597481 | -0,28 | 0,796482292 | -0,01 | 0,993772233 | 0,54  | 0,521206029 | 0,01  | 0,991980521 |
| 6030408B16Rik | 0,44  | 0,434641897 | 0,01  | 0,995592294 | -0,04 | 0,969591499 | -0,1  | 0,889515057 | -0,01 | 0,98771772  |
| 6030419C18Rik | 0,1   | 0,898572877 | -0,05 | 0,938944149 | -0,25 | 0,694702606 | 0,13  | 0,772322357 | -0,18 | 0,82794257  |
| 6030426L16Rik | -0,16 | 0,777335496 | 0,08  | 0,886077932 | -0,02 | 0,984778342 | 0,18  | 0,579333727 | 0,54  | 0,321199383 |
| 6030440G07Rik | -0,38 | 0,672882915 | 0,05  | 0,955872959 | -0,18 | 0,834069966 | 0,42  | 0,476999373 | 0,29  | 0,607874711 |
| 6030443J06Rik | 0,01  | 0,995778597 | 0,27  | 0,818301748 | -0,27 | 0,631323805 | -0,5  | 0,271257495 | -0,5  | 0,581731268 |
| 6030445D17Rik | -0,51 | 0,329339382 | 0,07  | 0,903089182 | -0,28 | 0,841669036 | -1,17 | 0,045932432 | -0,48 | 0,61650525  |
| 6030452D12Rik | -0,05 | 0,942710063 | -0,47 | 0,49563014  | 0,1   | 0,907130828 | -0,28 | 0,440183438 | 0,02  | 0,984125319 |
| 6030458C11Rik | 0,03  | 0,971963261 | 0,37  | 0,669006523 | -0,04 | 0,97556224  | 0,14  | 0,880348219 | 0,84  | 0,183548436 |
| 6030466F02Rik | -0,21 | 0,611339325 | 0,4   | 0,490598951 | 0,04  | 0,963775512 | -0,33 | 0,486817461 | -0,08 | 0,92519473  |
| 6030468B19Rik | 0,39  | 0,673291416 | 0,28  | 0,865420265 | 0,09  | 0,941627748 | -0,57 | 0,609540227 | -0,08 | 0,94989088  |
| 6030469F06Rik | -0,22 | 0,680794685 | 0,01  | 0,984962061 | -0,12 | 0,836625711 | 0,15  | 0,825899927 | -0,14 | 0,884640084 |
| 6030471H07Rik | -0,09 | 0,88552442  | -0,04 | 0,95245564  | -0,09 | 0,89906051  | 0,02  | 0,975492206 | -0,08 | 0,916458035 |
| 6030498E09Rik | -0,05 | 0,953175228 | 0,26  | 0,750777564 | -0,14 | 0,856046789 | 0,08  | 0,855094874 | 0     | 0,997303118 |
| 6230400D17Rik | -0,19 | 0,761120978 | -0,32 | 0,486104864 | -0,4  | 0,659694447 | -0,36 | 0,325202655 | 0,09  | 0,928671864 |
| 6230416C02Rik | 0,79  | 0,311635012 | 0,45  | 0,80097084  | -0,57 | 0,628902187 | -1,01 | 0,424096716 | -0,96 | 0,509461732 |
| 6230426M11Rik | -0,12 | 0,816465857 | 0,03  | 0,972482322 | -0,14 | 0,862246043 | 0,03  | 0,945619692 | -0,19 | 0,80155635  |
| 6330403A02Rik | -0,04 | 0,964154899 | -0,07 | 0,954948291 | -0,1  | 0,927301763 | 0,04  | 0,958939766 | -0,16 | 0,85508146  |
| 6330403K07Rik | 0     | 0,998210173 | 0,08  | 0,875546225 | -0,25 | 0,64759465  | -0,09 | 0,805452009 | -0,01 | 0,991559961 |
| 6330403L08Rik | 0,04  | 0,962399085 | 0,11  | 0,839673299 | -0,1  | 0,894109709 | 0,01  | 0,979241392 | -0,15 | 0,84597948  |
| 6330403N20Rik | -0,33 | 0,642618049 | 0,15  | 0,855632384 | 0,12  | 0,871259835 | 0,52  | 0,345959296 | 0,41  | 0,590339443 |
| 6330407A03Rik | -0,05 | 0,965991176 | -0,18 | 0,897811179 | -0,08 | 0,96858449  | -0,12 | 0,88524189  | -0,12 | 0,919058983 |
| 6330408A02Rik | 0,06  | 0,940051958 | 0,2   | 0,651604719 | -0,34 | 0,559176058 | -0,03 | 0,960747562 | -0,12 | 0,853198358 |
| 6330409D20Rik | 0,49  | 0,356134523 | 0,04  | 0,963369162 | 0,06  | 0,962980161 | 0,13  | 0,815939904 | 0,17  | 0,839481607 |
| 6330410L21Rik | 0,01  | 0,989017567 | 0,27  | 0,807175471 | -0,16 | 0,744387748 | 0,15  | 0,87148686  | 0,22  | 0,731211225 |

|               |       |             |       |             |       |             |       |             |       |             |
|---------------|-------|-------------|-------|-------------|-------|-------------|-------|-------------|-------|-------------|
| 6330411D24Rik | -0,04 | 0,946082673 | 0,14  | 0,807175471 | -0,23 | 0,628448141 | -0,07 | 0,879787528 | 0     | 0,996316932 |
| 6330415B21Rik | -0,05 | 0,928499167 | -0,13 | 0,86695983  | -0,1  | 0,86834176  | 0,04  | 0,923775458 | -0,01 | 0,991628025 |
| 6330415G19Rik | -0,29 | 0,507090099 | 0,03  | 0,957348889 | -0,2  | 0,787919415 | -0,2  | 0,646746982 | 0     | 0,996733137 |
| 6330416G13Rik | 0,45  | 0,214430522 | -0,02 | 0,990385801 | 0,57  | 0,280780716 | 0,69  | 0,3780827   | 0,45  | 0,650667979 |
| 6330418K02Rik | 0,23  | 0,808572184 | -0,2  | 0,870380105 | 0,07  | 0,943934563 | -0,05 | 0,944769683 | 0,32  | 0,586518737 |
| 6330420H09Rik | 0,16  | 0,749756723 | 0,08  | 0,863364159 | 0,16  | 0,737821076 | -0,07 | 0,871910826 | -0,11 | 0,868885122 |
| 6330549D23Rik | -0,24 | 0,733583213 | 0,12  | 0,884434898 | 0     | 0,997220401 | -0,12 | 0,761112157 | -0,1  | 0,895385476 |
| 6330562C20Rik | -0,19 | 0,859044359 | -0,22 | 0,831647298 | 0,05  | 0,959505445 | 0,37  | 0,357261043 | 0,4   | 0,476476367 |
| 6430411K18Rik | 0,17  | 0,840909921 | 0,33  | 0,627120896 | -0,14 | 0,876684089 | -0,71 | 0,282174447 | -0,07 | 0,932542111 |
| 6430503K07Rik | 0,37  | 0,572353292 | -0,27 | 0,810418074 | -0,1  | 0,952019801 | -0,12 | 0,874607411 | 0,14  | 0,879075155 |
| 6430531B16Rik | -0,26 | 0,85029103  | -0,15 | 0,903595287 | 0,6   | 0,352312788 | 0,1   | 0,816901896 | 0,48  | 0,462558109 |
| 6430548M08Rik | -0,74 | 0,503972678 | -0,55 | 0,430154065 | -0,02 | 0,982305856 | -2,51 | 0,011121575 | -0,82 | 0,202503357 |
| 6430550D23Rik | -0,08 | 0,948926586 | 0,01  | 0,996113371 | 0,16  | 0,791940256 | -0,09 | 0,920640884 | 0,43  | 0,693672681 |
| 6430562O15Rik | 0,44  | 0,49976831  | 0,61  | 0,16121328  | -0,01 | 0,993379272 | 0,45  | 0,450283107 | -0,36 | 0,726042963 |
| 6430571L13Rik | 0,29  | 0,580784638 | -0,02 | 0,98459889  | 0,03  | 0,974887915 | -0,21 | 0,606219578 | -0,06 | 0,942649328 |
| 6430573F11Rik | 0,07  | 0,928435159 | 0,21  | 0,892137343 | -0,54 | 0,433585844 | -0,32 | 0,679295468 | -0,32 | 0,566248044 |
| 6430584L05Rik | 0,24  | 0,691033117 | -0,28 | 0,745921616 | -0,22 | 0,624489093 | -0,06 | 0,911442206 | 0,34  | 0,483068417 |
| 6430590A07Rik | 0     | 0,998769353 | 0,32  | 0,765705056 | -0,03 | 0,963725374 | -0,82 | 0,099292323 | 0,15  | 0,879206646 |
| 6430628N08Rik | -0,25 | 0,514290686 | 0,04  | 0,937424389 | -0,11 | 0,85952125  | 0,15  | 0,686521503 | 0,09  | 0,913274952 |
| 6430710C18Rik | -0,21 | 0,824728873 | 0,38  | 0,729203925 | 0,01  | 0,995614743 | 0,15  | 0,936955674 | 0,43  | 0,790424343 |
| 6530401F13Rik | -0,01 | 0,98225675  | -0,22 | 0,658862137 | -0,01 | 0,990836784 | 0,22  | 0,603302092 | 0,05  | 0,950151148 |
| 6530402F18Rik | 0,19  | 0,859044359 | -0,19 | 0,820251798 | 0,31  | 0,715497532 | 0,03  | 0,988205241 | 0,36  | 0,840878005 |
| 6530409C15Rik | -0,21 | 0,841140165 | -0,99 | 0,228891409 | -0,74 | 0,138915123 | 0,48  | 0,483445334 | 0,22  | 0,825966687 |
| 6530411M01Rik | -0,11 | 0,792367608 | -0,11 | 0,817110093 | -0,4  | 0,527689832 | 0,07  | 0,871925977 | 0,09  | 0,909024113 |
| 6720468P15Rik | 0,02  | 0,978347418 | 0,06  | 0,956441911 | -0,31 | 0,637444183 | 0,18  | 0,661554419 | 0,23  | 0,845491405 |
| 6720483E21Rik | -0,04 | 0,972813908 | -0,43 | 0,738762579 | 0,03  | 0,979196406 | 0,45  | 0,567980006 | -0,54 | 0,503463069 |
| 6720489N17Rik | -0,37 | 0,567190014 | -0,38 | 0,623534166 | 0,02  | 0,982065419 | -0,09 | 0,936279921 | -0,25 | 0,824225979 |
| 6820408C15Rik | -0,29 | 0,612955561 | 0,02  | 0,98410255  | 0,06  | 0,956894731 | 0,02  | 0,983166423 | -0,18 | 0,823098095 |
| 6820426E19Rik | 0,01  | 0,98456417  | -0,24 | 0,674948431 | -0,03 | 0,973095129 | 0,16  | 0,679235449 | 0,08  | 0,919867638 |
| 6820431F20Rik | 0,3   | 0,424529546 | -0,09 | 0,862293956 | -0,17 | 0,788263753 | -0,23 | 0,559278753 | 0,01  | 0,986971861 |
| 7330404K18Rik | 0,2   | 0,671908315 | -0,02 | 0,984011449 | -0,25 | 0,602398215 | -0,11 | 0,768880868 | -0,28 | 0,583279373 |
| 7420426K07Rik | 0,01  | 0,991919022 | -0,15 | 0,882847123 | 0,42  | 0,660080472 | 0,32  | 0,522028354 | 0,4   | 0,600332767 |
| 7420461P10Rik | -0,09 | 0,892124736 | 0,49  | 0,45373941  | -0,31 | 0,77571553  | -0,08 | 0,898605649 | 0,31  | 0,612321677 |
| 7420700N18Rik | 0,08  | 0,905414735 | -0,16 | 0,785128233 | 0,13  | 0,853753298 | 0,15  | 0,797805401 | -0,28 | 0,662790079 |
| 7420701I03Rik | -0,08 | 0,886741208 | -0,03 | 0,981415366 | 0,05  | 0,941254389 | -0,09 | 0,819537084 | 0,05  | 0,954565959 |

|               |       |             |       |             |       |             |       |             |       |             |
|---------------|-------|-------------|-------|-------------|-------|-------------|-------|-------------|-------|-------------|
| 7530414M10Rik | 0,34  | 0,62872508  | -0,23 | 0,790939978 | -0,56 | 0,560191012 | 0,26  | 0,745759073 | -0,06 | 0,97425848  |
| 7530416G11Rik | 0,1   | 0,862124608 | 0,11  | 0,828818891 | -0,18 | 0,862441091 | -0,02 | 0,975687196 | -0,14 | 0,871038748 |
| 7630403G23Rik | -0,05 | 0,95241665  | 0,27  | 0,619606652 | 0,31  | 0,606950829 | -0,1  | 0,823812306 | 0,22  | 0,6754671   |
| 8030411F24Rik | -0,01 | 0,991919022 | 0,07  | 0,955475499 | 0,03  | 0,977511821 | 0,19  | 0,826933755 | -0,05 | 0,953228765 |
| 8030423F21Rik | 0,64  | 0,359025965 | -0,5  | 0,587634717 | -0,09 | 0,925417014 | 0,46  | 0,363947177 | 0,2   | 0,763240477 |
| 8030423J24Rik | 0,02  | 0,988414371 | -0,07 | 0,903089182 | 0,03  | 0,982097988 | -0,37 | 0,308317338 | -0,35 | 0,597080822 |
| 8030442B05Rik | -0,03 | 0,972164346 | 0,08  | 0,927205716 | 0,41  | 0,455889638 | 0     | 1           | 0,08  | 0,910829332 |
| 8030443G20Rik | -0,37 | 0,576879913 | -0,06 | 0,941258271 | 0,05  | 0,967767582 | 0,01  | 0,993337409 | 0,18  | 0,840531579 |
| 8030451A03Rik | 0,21  | 0,790580834 | -0,21 | 0,732847182 | -0,47 | 0,610632059 | 0,42  | 0,468546081 | 0,4   | 0,574430275 |
| 8030453O22Rik | -0,07 | 0,91938052  | 0,18  | 0,793842674 | -0,14 | 0,845993227 | -0,2  | 0,668471362 | 0,08  | 0,926008345 |
| 8030462N17Rik | 0,24  | 0,816465857 | 0,26  | 0,68433825  | -0,01 | 0,997268369 | 0,11  | 0,944654585 | 0,1   | 0,952296554 |
| 8030474K03Rik | -0,18 | 0,790497738 | 0,43  | 0,496223407 | -0,31 | 0,647988621 | -0,26 | 0,767933258 | -0,17 | 0,886693819 |
| 8430408G22Rik | -1,03 | 0,099229964 | -0,73 | 0,614530823 | -0,12 | 0,944468902 | 0,59  | 0,386397947 | -1,18 | 0,047747467 |
| 8430415O14Rik | 0,1   | 0,879437525 | -0,06 | 0,891099    | 0,01  | 0,989491273 | 0,33  | 0,312458821 | 0,04  | 0,961749007 |
| 8430419K02Rik | -0,08 | 0,922118639 | -0,07 | 0,88741189  | -0,27 | 0,659221613 | -0,43 | 0,587616882 | -0,37 | 0,755804272 |
| 8430422H06Rik | 0,18  | 0,718901325 | 0,19  | 0,823564094 | 0,01  | 0,993379272 | -0,02 | 0,963752888 | 0,12  | 0,854602258 |
| 8430423G03Rik | -0,29 | 0,556438284 | 0,55  | 0,244639773 | 0,09  | 0,914134206 | -0,28 | 0,50808678  | 0,03  | 0,979152939 |
| 8430426J06Rik | 0,24  | 0,575127945 | -0,2  | 0,638366221 | -0,08 | 0,923350407 | 0,01  | 0,992538313 | -0,28 | 0,744117522 |
| 8430429K09Rik | -0,01 | 0,993728727 | 0,3   | 0,695823136 | 0,03  | 0,980713449 | -0,81 | 0,575026413 | -0,46 | 0,697757911 |
| 8430431K14Rik | 0,12  | 0,79498488  | 0     | 1           | 0,22  | 0,715497532 | -0,28 | 0,561656192 | 0,59  | 0,498598092 |
| 8430432A02Rik | -0,04 | 0,944291635 | -0,06 | 0,898123848 | -0,36 | 0,622546805 | -0,26 | 0,665933714 | 0,08  | 0,952686875 |
| 8430436N08Rik | 0,09  | 0,866609637 | 0,29  | 0,471247707 | -0,39 | 0,570919064 | -0,05 | 0,950082402 | 0,06  | 0,973861565 |
| 8430437L04Rik | -0,01 | 0,991919022 | -0,68 | 0,239894522 | -0,28 | 0,735843035 | 0,31  | 0,538969551 | -0,37 | 0,583631554 |
| 9030025P20Rik | 0,34  | 0,651732317 | 0     | 1           | 0,02  | 0,991568687 | -1,95 | 0,082537014 | 0,15  | 0,932521789 |
| 9030204H09Rik | 0,85  | 0,524322664 | 0,15  | 0,824372931 | -0,62 | 0,294972378 | -1,14 | 0,288788965 | -0,15 | 0,950267521 |
| 9030404E10Rik | 0,12  | 0,839375532 | 0,23  | 0,735554037 | -0,69 | 0,13589176  | -0,14 | 0,736560404 | 0,12  | 0,915659009 |
| 9030407P20Rik | 0,02  | 0,982432452 | 0,01  | 0,996105203 | -0,02 | 0,990836784 | 0,08  | 0,8914104   | -0,23 | 0,789358981 |
| 9030612E09Rik | -0,06 | 0,894365171 | -0,05 | 0,927839254 | -0,16 | 0,823739692 | -0,02 | 0,968311421 | 0,19  | 0,790215612 |
| 9030617O03Rik | -1,18 | 0,187868882 | -1,02 | 0,654217577 | 0,74  | 0,209534486 | 0,14  | 0,708905739 | -0,56 | 0,330314966 |
| 9030619P08Rik | 0,35  | 0,479242832 | 0,02  | 0,979002922 | -0,33 | 0,584320897 | -0,17 | 0,739261742 | 0,09  | 0,915356549 |
| 9030622O22Rik | -0,07 | 0,926614242 | -0,26 | 0,75380926  | -0,38 | 0,505038995 | 0,23  | 0,731471845 | 0,04  | 0,978604922 |
| 9030624G23Rik | 0,15  | 0,886889675 | -0,59 | 0,432687588 | -0,29 | 0,571405665 | 0,35  | 0,509774032 | -0,24 | 0,669149621 |
| 9030624J02Rik | -0,01 | 0,984967814 | -0,01 | 0,992949484 | 0,58  | 0,452731181 | 0,1   | 0,868743047 | -0,47 | 0,374616846 |
| 9130004J05Rik | 0,56  | 0,397822993 | 0,24  | 0,719308025 | -0,14 | 0,89248624  | -0,37 | 0,43212345  | 0,11  | 0,937446198 |
| 9130008F23Rik | 0,44  | 0,600313897 | -0,05 | 0,945012055 | 0,51  | 0,637321546 | 1,01  | 0,451779583 | 0,63  | 0,685316571 |

|               |       |             |       |             |       |             |       |             |       |             |
|---------------|-------|-------------|-------|-------------|-------|-------------|-------|-------------|-------|-------------|
| 9130011E15Rik | -0,44 | 0,485617228 | -0,24 | 0,789363581 | 0,62  | 0,568619313 | -0,33 | 0,496611442 | -0,12 | 0,883592868 |
| 9130015A21Rik | 0,41  | 0,391196608 | 0,16  | 0,79336039  | 0,28  | 0,549195078 | -0,08 | 0,915532343 | -0,32 | 0,731865047 |
| 9130015L21Rik | -0,01 | 0,993728727 | 0,14  | 0,751116121 | 0,15  | 0,846495171 | -0,13 | 0,873221641 | -0,14 | 0,860292816 |
| 9130017K11Rik | 0,08  | 0,892124736 | 0,09  | 0,932292974 | 0,24  | 0,878636183 | -0,5  | 0,202259491 | -0,47 | 0,308256382 |
| 9130019O22Rik | -0,09 | 0,927556979 | 0,43  | 0,46025541  | 0,04  | 0,966359868 | -0,58 | 0,578729685 | -0,29 | 0,813475751 |
| 9130019P16Rik | 0,26  | 0,607696343 | 0,11  | 0,807463629 | 0,39  | 0,585672186 | -0,43 | 0,27328094  | -0,15 | 0,853107295 |
| 9130020K20Rik | -0,1  | 0,877498793 | -0,01 | 0,995350053 | -0,34 | 0,702677589 | -0,41 | 0,455883516 | -0,02 | 0,991216325 |
| 9130023H24Rik | -0,03 | 0,976574175 | -0,25 | 0,535950767 | 0,51  | 0,457506381 | -0,18 | 0,884341714 | 0,32  | 0,823098095 |
| 9130024F11Rik | 0,24  | 0,746818781 | -0,68 | 0,314497565 | -0,12 | 0,88783743  | 0,95  | 0,086968945 | 0,15  | 0,814427046 |
| 9130204K15Rik | -0,15 | 0,942213575 | -0,77 | 0,324369036 | -0,89 | 0,245030155 | 0,42  | 0,461412838 | -0,02 | 0,991980521 |
| 9130204L05Rik | -0,37 | 0,307912135 | -0,07 | 0,935299542 | -0,05 | 0,967930981 | -0,29 | 0,547681234 | -0,03 | 0,973428839 |
| 9130209A04Rik | -0,13 | 0,828767158 | -0,37 | 0,438549879 | -0,12 | 0,909233941 | 0,39  | 0,393759175 | -0,03 | 0,982779069 |
| 9130213A22Rik | 0     | 0,999125643 | 0     | 1           | -0,41 | 0,302861841 | -0,05 | 0,914628115 | 0,18  | 0,823098095 |
| 9130221F21Rik | -0,01 | 0,986636441 | -0,37 | 0,729172466 | -0,17 | 0,775290551 | 0     | 0,995454239 | -0,58 | 0,324093515 |
| 9130221H12Rik | 0,05  | 0,954163725 | 0,12  | 0,931316337 | -0,65 | 0,321560439 | -0,37 | 0,522511755 | -0,26 | 0,716229308 |
| 9130227L01Rik | 0,31  | 0,586458491 | -0,24 | 0,849473761 | -0,14 | 0,890702663 | 0,42  | 0,392575443 | 0,08  | 0,939127163 |
| 9130230L23Rik | 0,07  | 0,926692467 | 0,03  | 0,979002922 | 0,13  | 0,859411859 | 0,21  | 0,721611115 | 0,21  | 0,765809384 |
| 9130230N09Rik | 0,63  | 0,412428444 | 1,34  | 0,0535509   | 0,06  | 0,973802765 | -0,59 | 0,179012087 | 1,34  | 0,040259622 |
| 9130401M01Rik | -0,12 | 0,844285362 | -0,24 | 0,816543137 | 0,36  | 0,534181832 | 0,2   | 0,733028982 | -0,06 | 0,948117662 |
| 9130409I23Rik | 0,15  | 0,867243066 | 0,31  | 0,786394409 | 0,15  | 0,796904065 | -0,24 | 0,635378562 | 0,04  | 0,979456872 |
| 9130409J20Rik | -0,22 | 0,738714467 | 0,18  | 0,857388191 | -0,39 | 0,497205965 | -0,02 | 0,967866794 | 0,06  | 0,95284634  |
| 9130410C08Rik | -0,13 | 0,84241758  | 0,35  | 0,49599855  | 0,05  | 0,952005428 | -0,15 | 0,685226398 | -0,02 | 0,980961333 |
| 9230009I02Rik | 0,13  | 0,908272477 | 0,11  | 0,928134372 | -0,17 | 0,875434047 | 0,1   | 0,900987927 | 0,28  | 0,655941103 |
| 9230019H11Rik | -0,02 | 0,98456417  | -0,03 | 0,967833514 | -0,23 | 0,736837174 | 0     | 0,999809258 | 0,27  | 0,694233384 |
| 9230020A06Rik | 0,47  | 0,362991427 | -0,01 | 0,994137877 | -0,49 | 0,326707568 | -0,16 | 0,766679066 | -0,17 | 0,880202418 |
| 9230102K24Rik | -0,13 | 0,93534828  | -0,67 | 0,537678815 | 0,5   | 0,669266652 | 3,04  | 0,003907268 | -0,21 | 0,746672639 |
| 9230102O04Rik | 0,21  | 0,818240052 | 0,46  | 0,666450149 | 0,19  | 0,873457545 | -0,39 | 0,488287457 | -0,19 | 0,864415219 |
| 9230104L09Rik | -0,27 | 0,517149278 | 0,11  | 0,880892852 | -0,19 | 0,811187914 | -0,02 | 0,972827389 | -0,04 | 0,960974478 |
| 9230105E05Rik | 0,17  | 0,66946372  | -0,13 | 0,794404033 | -0,14 | 0,825963783 | 0,2   | 0,597350222 | 0,23  | 0,697818445 |
| 9230109A22Rik | 0,03  | 0,971922167 | 0,17  | 0,668133718 | -0,16 | 0,788233735 | -0,04 | 0,941639261 | 0     | 0,998332822 |
| 9230110C19Rik | 1,23  | 0,212230215 | 0,16  | 0,931596594 | 0,3   | 0,599648113 | 0,7   | 0,405021536 | 0,45  | 0,741456572 |
| 9230110F15Rik | -0,18 | 0,808882471 | 0     | 1           | -0,43 | 0,318542207 | 0,03  | 0,961123444 | 0,03  | 0,975986697 |
| 9230112D13Rik | 0,27  | 0,593346967 | -0,39 | 0,526182879 | -0,26 | 0,780077469 | -0,05 | 0,947717007 | -0,03 | 0,984125319 |
| 9230112E08Rik | -0,23 | 0,832696131 | -0,45 | 0,75247655  | -0,48 | 0,611550275 | 0,47  | 0,692059018 | -0,29 | 0,858534673 |
| 9230112J17Rik | 0,1   | 0,823793867 | -0,47 | 0,403364852 | 0,26  | 0,644036028 | 0,2   | 0,660484052 | 0,07  | 0,947437555 |

|               |       |             |       |             |       |             |       |             |       |             |
|---------------|-------|-------------|-------|-------------|-------|-------------|-------|-------------|-------|-------------|
| 9230114K14Rik | -0,26 | 0,794953851 | -1,02 | 0,479120651 | 0,55  | 0,546928756 | 0,97  | 0,254458714 | 0,67  | 0,383782065 |
| 9230116N13Rik | -0,19 | 0,748867208 | 0,08  | 0,926210163 | 0,11  | 0,882540073 | 0,34  | 0,48505774  | 1,05  | 0,155716667 |
| 9230117E06Rik | -0,04 | 0,948926586 | -0,06 | 0,956049982 | 0,09  | 0,896728577 | 0,01  | 0,993337409 | -0,04 | 0,960974478 |
| 9330020H09Rik | 0,24  | 0,705461486 | -0,49 | 0,213731156 | -0,24 | 0,764964006 | 0,44  | 0,285133875 | 0,09  | 0,910186167 |
| 9330102E08Rik | 0,3   | 0,628200732 | 0,1   | 0,882931058 | -0,08 | 0,928115273 | -0,08 | 0,8914104   | -0,14 | 0,847312006 |
| 9330104G04Rik | -0,13 | 0,789775503 | 0,55  | 0,284547318 | 0,03  | 0,970939073 | -0,55 | 0,492934459 | 0,09  | 0,947901649 |
| 9330111N05Rik | -0,17 | 0,773356367 | -0,05 | 0,97875059  | 0,41  | 0,75008597  | -0,1  | 0,932489351 | 0,54  | 0,442372286 |
| 9330117O12Rik | 0,46  | 0,388392471 | 0,4   | 0,411059412 | -0,08 | 0,912334731 | 0,18  | 0,702077739 | 0,24  | 0,764124978 |
| 9330121J05Rik | 0,03  | 0,966775766 | -0,01 | 0,991131565 | -0,33 | 0,777417583 | 0     | 1           | 0,44  | 0,554975763 |
| 9330133O14Rik | -0,32 | 0,49976831  | -0,2  | 0,650921274 | 0,2   | 0,742758388 | 0,05  | 0,950597099 | -0,41 | 0,479454706 |
| 9330136K24Rik | -0,24 | 0,600952042 | -0,22 | 0,615288453 | 0,1   | 0,912659748 | -0,43 | 0,212629775 | -0,19 | 0,782160293 |
| 9330151L19Rik | 0,14  | 0,796396177 | -0,04 | 0,938711163 | -0,41 | 0,343594254 | -0,03 | 0,959171727 | 0,05  | 0,960974478 |
| 9330154J02Rik | 0,02  | 0,98297164  | -0,25 | 0,683839266 | -0,25 | 0,784775459 | 0,05  | 0,920160883 | -0,2  | 0,765340194 |
| 9330154K18Rik | 0,29  | 0,637135317 | 0,46  | 0,572334793 | -0,05 | 0,956340132 | -0,36 | 0,616285736 | 0,07  | 0,931519966 |
| 9330158H04Rik | 0,26  | 0,620468351 | -0,49 | 0,475367149 | 0,18  | 0,777417583 | -0,18 | 0,630272941 | -0,21 | 0,786434393 |
| 9330159F19Rik | 0,29  | 0,68161851  | -0,51 | 0,500935318 | -0,28 | 0,744243675 | 0,35  | 0,588854558 | 0,39  | 0,66855342  |
| 9330159M07Rik | -0,06 | 0,905834527 | 0,3   | 0,563746321 | -0,34 | 0,741150371 | -0,05 | 0,92289757  | -0,17 | 0,810276195 |
| 9330160F10Rik | -0,06 | 0,941218573 | 0,01  | 0,994944319 | -0,32 | 0,675257552 | -0,04 | 0,959958662 | 0,06  | 0,974553568 |
| 9330161L09Rik | 0,05  | 0,969738799 | 0,89  | 0,300832923 | -0,17 | 0,890632058 | -1,78 | 0,077830921 | 0,13  | 0,934615324 |
| 9330162012Rik | 0,15  | 0,803557792 | -0,32 | 0,527123873 | -0,05 | 0,961337501 | 0,07  | 0,905468987 | 0     | 0,99981982  |
| 9330162B11Rik | 0,24  | 0,701414945 | 0,03  | 0,98459889  | 0,16  | 0,776071062 | 0,03  | 0,952797297 | 0,13  | 0,875421436 |
| 9330171B17Rik | -0,29 | 0,607568823 | 0,02  | 0,983496065 | 0,22  | 0,736445534 | 0     | 0,998900166 | 0,32  | 0,681597394 |
| 9330175E14Rik | 1,49  | 0,074890017 | 1,27  | 0,087265444 | -1,43 | 0,124647743 | 0,87  | 0,192469959 | 1,49  | 0,060986193 |
| 9330175M20Rik | 0,6   | 0,636165386 | -0,07 | 0,972121186 | -0,21 | 0,750850422 | 0,49  | 0,446844848 | 0,07  | 0,972590168 |
| 9330178D15Rik | -0,31 | 0,676800971 | 0,07  | 0,938711163 | -0,02 | 0,985347628 | -0,09 | 0,916455982 | 0,37  | 0,524086785 |
| 9330179D12Rik | 0,33  | 0,520609641 | 0,08  | 0,935439333 | -0,04 | 0,969476711 | -0,24 | 0,661076387 | 0,19  | 0,851207222 |
| 9330182L06Rik | 0,2   | 0,832696131 | 0,01  | 0,9957438   | -0,42 | 0,452053355 | 0,18  | 0,812048135 | 0,2   | 0,858872204 |
| 9330182O14Rik | 0,46  | 0,363597602 | 0,18  | 0,752804236 | -0,1  | 0,938710861 | -0,04 | 0,962341312 | -0,04 | 0,969617491 |
| 9330185C12Rik | -0,03 | 0,953003466 | 0,14  | 0,840420543 | 0,22  | 0,70398922  | 0,01  | 0,98427899  | 0,03  | 0,981030324 |
| 9330188P03Rik | -0,32 | 0,705173108 | 0,3   | 0,517288934 | 1,53  | 0,379638471 | 0,55  | 0,441582774 | 0,22  | 0,813405251 |
| 9330198N18Rik | -0,11 | 0,859630951 | 0,22  | 0,84786877  | 0,06  | 0,958214619 | 0,35  | 0,594372954 | 0,13  | 0,916083812 |
| 9330210C06    | 0,31  | 0,602160482 | -0,13 | 0,880892852 | 0,28  | 0,703045192 | 0,02  | 0,959836864 | 0,2   | 0,831446445 |
| 9430002A10Rik | -0,04 | 0,977909343 | -0,71 | 0,344340083 | 0,39  | 0,37721644  | 0,25  | 0,899335603 | -0,3  | 0,885318142 |
| 9430007A20Rik | 0,47  | 0,429087715 | -0,16 | 0,837480636 | 0,14  | 0,881463812 | 0,07  | 0,937889158 | 0,09  | 0,916173996 |
| 9430014N10Rik | 0,04  | 0,939317944 | 0,28  | 0,594415097 | 0,06  | 0,929871006 | 0,11  | 0,751676175 | 0,05  | 0,960065122 |

|               |       |             |       |             |       |             |       |             |       |             |
|---------------|-------|-------------|-------|-------------|-------|-------------|-------|-------------|-------|-------------|
| 9430015G10Rik | -0,14 | 0,843101965 | -0,01 | 0,996259587 | 0,72  | 0,418083387 | 0,5   | 0,391327185 | 0,01  | 0,986971861 |
| 9430016H08Rik | -0,07 | 0,955200574 | -0,21 | 0,633883634 | 0,11  | 0,966359868 | 1,06  | 0,606787549 | 0,77  | 0,728827118 |
| 9430018G01Rik | 0,37  | 0,513512947 | 0,19  | 0,763796207 | -0,31 | 0,799623739 | -0,02 | 0,977710969 | -0,01 | 0,992370267 |
| 9430019J16Rik | 0,01  | 0,993175772 | -0,13 | 0,802979985 | -0,04 | 0,95106142  | 0     | 1           | 0,09  | 0,890944793 |
| 9430020K01Rik | 0,03  | 0,959774806 | 0,24  | 0,637595325 | -0,17 | 0,720590502 | -0,04 | 0,958056332 | -0,29 | 0,634515023 |
| 9430021M05Rik | 0,17  | 0,779331628 | -0,14 | 0,724649414 | 0,24  | 0,654841851 | 0,25  | 0,680951303 | 0,1   | 0,890833196 |
| 9430024E24Rik | -0,13 | 0,890974575 | 0,11  | 0,828219939 | 0,06  | 0,941007091 | 0,06  | 0,909873635 | 0,25  | 0,655010871 |
| 9430032J07Rik | 0,26  | 0,601533006 | -0,06 | 0,919172338 | -0,03 | 0,973732268 | 0,09  | 0,849421375 | -0,08 | 0,913553402 |
| 9430037G07Rik | 0,6   | 0,4124022   | 0,06  | 0,918400751 | 0,2   | 0,868938606 | -0,08 | 0,939275881 | -0,31 | 0,817914157 |
| 9430038I01Rik | 0     | 0,998017023 | 0,05  | 0,949561659 | 0,21  | 0,752157341 | -0,14 | 0,760654154 | 0,11  | 0,91314596  |
| 9430041J12Rik | -0,29 | 0,63233256  | 0,43  | 0,449389394 | -0,11 | 0,892881818 | -0,21 | 0,50808678  | 0,06  | 0,951429597 |
| 9430060I03Rik | -0,05 | 0,950669622 | 0,19  | 0,651611182 | 0,12  | 0,899171797 | -0,17 | 0,678790333 | 0,04  | 0,961406182 |
| 9430065F17Rik | -0,08 | 0,932531737 | 0     | 1           | -0,08 | 0,923520317 | 0,05  | 0,948515439 | 0,24  | 0,780016298 |
| 9430069I07Rik | 0,29  | 0,638305806 | 0,31  | 0,631460903 | 0,16  | 0,85163752  | 0,08  | 0,940197763 | 0,11  | 0,935708361 |
| 9430076C15Rik | -0,5  | 0,503482921 | -0,15 | 0,840322563 | -0,06 | 0,952366216 | 0,92  | 0,087326688 | -0,31 | 0,72670171  |
| 9430077A04Rik | 0,07  | 0,892882966 | -0,08 | 0,882847123 | 0,07  | 0,915713144 | 0     | 1           | -0,06 | 0,940878193 |
| 9430083A17Rik | 0,2   | 0,600313897 | 0,14  | 0,842953835 | -0,01 | 0,990836784 | 0,02  | 0,970163463 | -0,16 | 0,815106351 |
| 9430091E24Rik | 0,45  | 0,558017944 | -0,6  | 0,49941722  | 0,08  | 0,947881687 | -0,9  | 0,390808076 | -0,85 | 0,360726287 |
| 9430093N23Rik | -0,16 | 0,724502628 | -0,07 | 0,89081665  | 0,03  | 0,965364164 | 0,16  | 0,685226398 | 0,13  | 0,859025777 |
| 9430097D07Rik | -0,06 | 0,934722335 | 0,18  | 0,701043773 | -0,15 | 0,777585537 | -0,08 | 0,903561251 | -0,1  | 0,912499071 |
| 9530002B09Rik | 0,16  | 0,679648318 | 0,08  | 0,909079807 | 0,12  | 0,819509208 | -0,29 | 0,50447234  | -0,2  | 0,811975973 |
| 9530003J23Rik | 0,21  | 0,761457464 | 0,01  | 0,999395995 | -0,09 | 0,921956183 | -0,36 | 0,629699859 | -0,79 | 0,122922652 |
| 9530026F06Rik | 0,4   | 0,481677041 | 0,18  | 0,823445142 | -0,16 | 0,809137779 | -0,11 | 0,834521829 | -0,04 | 0,973576804 |
| 9530026P05Rik | 0,45  | 0,65525391  | 0,38  | 0,690515082 | -0,16 | 0,791940256 | -2,46 | 0,013206462 | 0     | 0,998444219 |
| 9530027J09Rik | 0,07  | 0,936051646 | -0,18 | 0,747707816 | 0,37  | 0,546810675 | -1,07 | 0,40628762  | -0,21 | 0,923846654 |
| 9530034E10Rik | 0,04  | 0,958535933 | 0,01  | 0,990052916 | -0,11 | 0,867543859 | -0,43 | 0,555946907 | 0,68  | 0,351364129 |
| 9530036M11Rik | -0,19 | 0,722504009 | -0,43 | 0,377274412 | -0,15 | 0,792133267 | 0,31  | 0,467580023 | -0,15 | 0,860058375 |
| 9530036O11Rik | 0,3   | 0,510737023 | 0,17  | 0,853388981 | -0,2  | 0,687268336 | 0,13  | 0,849351031 | -0,01 | 0,989183416 |
| 9530046B11Rik | -0,15 | 0,813281676 | -0,34 | 0,708928713 | -0,1  | 0,922318683 | 0,03  | 0,958939766 | -0,16 | 0,852287138 |
| 9530051G07Rik | -0,11 | 0,89763852  | -0,06 | 0,932292974 | 0,04  | 0,95204022  | 0,2   | 0,649456235 | 0,26  | 0,726042963 |
| 9530052C20Rik | 0,01  | 0,984972115 | -0,15 | 0,903595287 | -0,25 | 0,576939208 | 0,31  | 0,443514966 | -0,19 | 0,748900673 |
| 9530052E02Rik | 0,52  | 0,237911715 | -0,3  | 0,73623784  | -0,44 | 0,530318769 | 0,47  | 0,225406554 | 0,63  | 0,256989438 |
| 9530053A07Rik | 0     | 0,996925522 | 0,17  | 0,717428048 | -0,21 | 0,665379478 | -0,15 | 0,821341232 | -0,28 | 0,767310323 |
| 9530059O14Rik | -0,12 | 0,864526424 | 0,86  | 0,583200444 | 0,08  | 0,973834631 | 1,69  | 0,095252368 | -0,06 | 0,935708361 |
| 9530068E07Rik | 0,03  | 0,969577981 | 0,27  | 0,572365708 | -0,45 | 0,368620918 | 0,57  | 0,307458691 | 0,36  | 0,578445432 |

|                |       |             |       |             |       |             |       |             |       |             |
|----------------|-------|-------------|-------|-------------|-------|-------------|-------|-------------|-------|-------------|
| 9530077C05Rik  | 0,26  | 0,638456995 | 0,29  | 0,823530278 | -0,69 | 0,379638471 | -1,21 | 0,279779407 | 0,27  | 0,885318142 |
| 9530080O11Rik  | 0,52  | 0,172698611 | 0     | 1           | -0,81 | 0,400880567 | 0,12  | 0,747854799 | 0,39  | 0,596602457 |
| 9530082P21Rik  | 0,3   | 0,71214723  | 0,23  | 0,730075625 | -0,35 | 0,602775092 | -1,08 | 0,050779204 | 0,26  | 0,734958502 |
| 9530085L02Rik  | 0,23  | 0,597297093 | 0,06  | 0,917821097 | -0,07 | 0,935168506 | 0,16  | 0,695466651 | 0,13  | 0,860877067 |
| 9530091C08Rik  | -0,08 | 0,858269816 | 0,04  | 0,932338539 | 0,19  | 0,717856288 | -0,62 | 0,276827466 | -0,13 | 0,885872093 |
| 9630001P10Rik  | -0,11 | 0,869565514 | 0,25  | 0,731912687 | -0,14 | 0,83346229  | 0,06  | 0,945953123 | 0,38  | 0,587305934 |
| 9630013A20Rik  | -0,03 | 0,968370059 | 0,15  | 0,817367084 | -0,06 | 0,941627748 | -0,1  | 0,873221641 | 0,17  | 0,84701421  |
| 9630013D21Rik  | -0,11 | 0,925510521 | -0,3  | 0,829892665 | 0,28  | 0,802534871 | 0,21  | 0,789082749 | -0,14 | 0,872429951 |
| 9630013K17Rik  | -0,12 | 0,815649066 | -0,12 | 0,850762872 | -0,02 | 0,990836784 | 0,21  | 0,581261175 | -0,02 | 0,984065984 |
| 9630014M24Rik  | 0,34  | 0,598549484 | 0,21  | 0,739064074 | -0,34 | 0,620837479 | 0,17  | 0,727132895 | 0,27  | 0,677222415 |
| 9630028B13Rik  | 0,08  | 0,858748956 | 0,11  | 0,807175471 | -0,23 | 0,63335587  | 0,12  | 0,761591561 | 0,19  | 0,765340194 |
| 9630028H03Rik  | 0,1   | 0,81629489  | -0,11 | 0,882931058 | -0,01 | 0,989491273 | -0,05 | 0,910229233 | 0,28  | 0,623304657 |
| 9630041A04Rik  | 0,33  | 0,584255942 | -0,05 | 0,941811651 | -0,11 | 0,904844142 | 0,15  | 0,776736641 | -0,05 | 0,960065122 |
| 9830107B12Rik  | -0,75 | 0,11435382  | -0,33 | 0,639603025 | 0,23  | 0,761826181 | 0,08  | 0,947105413 | -0,14 | 0,918865935 |
| 9830132P13Rik  | -0,14 | 0,874143247 | 0,06  | 0,900280666 | -0,28 | 0,660920525 | 0,1   | 0,805452009 | 0,04  | 0,969117862 |
| 9830144P21Rik  | 0,11  | 0,842216945 | 0,14  | 0,88741189  | 0,08  | 0,901816517 | 0,11  | 0,829714145 | 0,04  | 0,978882303 |
| 9830147E19Rik  | -0,5  | 0,621890075 | -0,34 | 0,917304408 | -0,16 | 0,909233941 | -0,12 | 0,959566803 | -0,9  | 0,653769438 |
| 9830166K06Rik  | 0,09  | 0,836049999 | 0,07  | 0,890385783 | 0,15  | 0,793687326 | 0,05  | 0,949606416 | 0,48  | 0,453749913 |
| 9930012K11Rik  | -0,45 | 0,69801847  | -0,83 | 0,158696948 | 0,69  | 0,379638471 | -0,04 | 0,96047559  | -0,63 | 0,466753993 |
| 9930014A18Rik  | -0,37 | 0,419591944 | -0,27 | 0,68959766  | -0,11 | 0,921090652 | -1,31 | 0,137515028 | -0,92 | 0,265523913 |
| 9930017N22Rik  | 0,27  | 0,842851909 | 0,41  | 0,588252324 | 0,96  | 0,280958182 | 0,05  | 0,963694658 | 0,16  | 0,910829332 |
| 9930021J03Rik  | 0,23  | 0,730826092 | 0,31  | 0,421720178 | -0,37 | 0,70635953  | -0,66 | 0,28351096  | -0,02 | 0,986579193 |
| 9930022D16Rik  | 0,36  | 0,460654094 | -0,18 | 0,785128233 | -0,27 | 0,622546805 | 0,14  | 0,789616492 | 0,04  | 0,973685182 |
| 9930038B18Rik  | -0,06 | 0,931456925 | 0,01  | 0,990380046 | -0,07 | 0,922318683 | -0,35 | 0,501744293 | -0,67 | 0,307816931 |
| 9930104L06Rik  | -0,49 | 0,420134534 | -0,11 | 0,897645724 | 0,09  | 0,935877713 | -0,23 | 0,85301747  | -0,2  | 0,874717264 |
| 9930111J21Rik1 | 1,12  | 0,024768323 | 0,79  | 0,261025347 | -0,97 | 0,114934178 | -0,44 | 0,414539918 | 0,84  | 0,117149411 |
| 9930111J21Rik2 | 1,9   | 0,06958443  | 0,86  | 0,10752682  | -1,69 | 0,09059546  | -0,55 | 0,595510906 | 1,02  | 0,287590871 |
| a              | 0,22  | 0,685972631 | 0,45  | 0,483304821 | 0,31  | 0,804716642 | -0,33 | 0,701167068 | 0,14  | 0,885872093 |
| A030001D20Rik  | -0,93 | 0,365716768 | 0,32  | 0,507971236 | 0,02  | 0,98999309  | -0,04 | 0,958056332 | -0,6  | 0,354557431 |
| A130010J15Rik  | -0,08 | 0,928544937 | 0,51  | 0,214321569 | 0,44  | 0,513446928 | -1,02 | 0,211730122 | -0,62 | 0,566316175 |
| A130015J22Rik  | 0,23  | 0,551166082 | 0,1   | 0,832655657 | -0,06 | 0,931918382 | -0,03 | 0,945953123 | 0,09  | 0,886328419 |
| A130023I24Rik  | -0,2  | 0,755984234 | 0,01  | 0,994161588 | -0,03 | 0,963287567 | -0,07 | 0,899003207 | -0,1  | 0,904737757 |
| A130030D18Rik  | -0,16 | 0,679451519 | -0,04 | 0,943915456 | 0     | 0,997581017 | -0,2  | 0,688041015 | 0,06  | 0,947257087 |
| A130040M12Rik  | 0,4   | 0,314847433 | -0,04 | 0,943132331 | -0,57 | 0,371992214 | 2,77  | 0,015053787 | -0,31 | 0,712121015 |
| A130050O07Rik  | -0,01 | 0,996219097 | -0,27 | 0,720902851 | 0,58  | 0,559616081 | 0,28  | 0,602597253 | -0,63 | 0,518216192 |



|               |       |             |       |             |       |             |       |             |       |             |
|---------------|-------|-------------|-------|-------------|-------|-------------|-------|-------------|-------|-------------|
| A130051J06Rik | -0,01 | 0,992489804 | -0,39 | 0,645950583 | 0,07  | 0,914134206 | 0,18  | 0,828955037 | -0,16 | 0,884244347 |
| A130077B15Rik | -0,22 | 0,757032046 | -0,23 | 0,667054721 | 0,78  | 0,412643917 | -0,43 | 0,382691377 | -0,26 | 0,816216407 |
| A1bg          | -0,06 | 0,947630317 | 0,11  | 0,929380585 | -0,3  | 0,574125052 | 0,02  | 0,970931237 | 0,06  | 0,939930189 |
| A1cf          | -0,59 | 0,279793863 | 0,27  | 0,671319666 | 0,01  | 0,991568687 | -0,8  | 0,112183607 | -0,51 | 0,622910734 |
| A230001M10Rik | 0,09  | 0,886680488 | -0,17 | 0,790350061 | 0,05  | 0,956232887 | 0,17  | 0,729857506 | 0,09  | 0,932268703 |
| A230004M16Rik | 0,11  | 0,88700256  | -0,15 | 0,796752633 | 0,33  | 0,640464842 | 0,31  | 0,624319809 | 0,27  | 0,739121045 |
| A230005M16Rik | -0,13 | 0,900340189 | -0,19 | 0,8656311   | 0,12  | 0,842767638 | -0,34 | 0,490353906 | -0,27 | 0,718869886 |
| A230006K03Rik | 0,41  | 0,560461791 | 0,28  | 0,829203986 | -0,4  | 0,651825599 | -0,1  | 0,89869397  | 0,24  | 0,715879151 |
| A230009B12Rik | 0,02  | 0,979130815 | -0,03 | 0,96497149  | -0,27 | 0,605049228 | 0,21  | 0,556282326 | 0,04  | 0,969117862 |
| A230020J21Rik | 0,12  | 0,806884829 | 0,03  | 0,971499809 | 0,15  | 0,871001035 | -0,19 | 0,695517571 | 0,3   | 0,571139447 |
| A230028O05Rik | -0,5  | 0,34052888  | 0     | 0,999951794 | 0,35  | 0,700061351 | 0,21  | 0,628025679 | -0,24 | 0,744014314 |
| A230045G11Rik | -0,15 | 0,924139727 | 0,04  | 0,9860901   | 0,4   | 0,78634406  | -0,66 | 0,186888387 | -0,3  | 0,729457433 |
| A230046K03Rik | -0,11 | 0,871087325 | 0,24  | 0,756267547 | -0,55 | 0,470938481 | -0,39 | 0,391327185 | 0,37  | 0,481762055 |
| A230050P20Rik | 0,2   | 0,663447662 | 0,37  | 0,409204827 | -0,89 | 0,097897914 | -0,36 | 0,637588177 | 0,63  | 0,32673984  |
| A230051N06Rik | -0,06 | 0,905414735 | -0,16 | 0,815808041 | 0,01  | 0,990836784 | 0,23  | 0,62163258  | 0,07  | 0,939930189 |
| A230052G05Rik | 0,27  | 0,62872508  | -0,19 | 0,740003931 | -0,04 | 0,955761087 | 0,2   | 0,679577544 | 0,27  | 0,593413326 |
| A230056J06Rik | 0,1   | 0,882060783 | 0,36  | 0,494858163 | -0,27 | 0,622546805 | 0,09  | 0,875254989 | 0,06  | 0,939127163 |
| A230056P14Rik | -0,19 | 0,889788892 | 0,48  | 0,370515616 | -0,06 | 0,966297296 | -0,86 | 0,15935962  | -0,95 | 0,099401996 |
| A230057D06Rik | 0,8   | 0,195505211 | 0,33  | 0,65041955  | -0,06 | 0,969247498 | -0,56 | 0,548879405 | -0,07 | 0,974553568 |
| A230059L01Rik | 0,47  | 0,589079174 | 0,01  | 0,991108041 | -0,14 | 0,816934675 | -0,17 | 0,599633602 | 0,15  | 0,860292816 |
| A230065H16Rik | 0,16  | 0,89763852  | 0,19  | 0,761404909 | 0,17  | 0,836625711 | -0,01 | 0,981332523 | 0,09  | 0,91824793  |
| A230065N10Rik | -0,38 | 0,602160482 | 0,29  | 0,894274965 | -0,04 | 0,965775869 | -0,21 | 0,700712852 | 0,34  | 0,587305934 |
| A230070E04Rik | 0,04  | 0,957398577 | -0,07 | 0,911024505 | 0,32  | 0,420043356 | 0     | 1           | 0,44  | 0,419557334 |
| A230072C01Rik | -0,43 | 0,522076759 | 0,53  | 0,629493333 | -0,52 | 0,742758388 | -0,34 | 0,789717483 | 0,09  | 0,962525821 |
| A230072E10Rik | 0,05  | 0,950669622 | -0,26 | 0,646170664 | -0,01 | 0,992114185 | -0,07 | 0,919126119 | 0,11  | 0,884248437 |
| A230072I06Rik | -0,07 | 0,920244507 | -0,05 | 0,956504634 | 0,04  | 0,969262382 | 0,06  | 0,871972247 | 0,1   | 0,90992791  |
| A230077H06Rik | 0,16  | 0,818182081 | -0,2  | 0,853569707 | -0,02 | 0,987356432 | 0,63  | 0,567941581 | 0,14  | 0,92261128  |
| A230083G16Rik | 0,05  | 0,929279372 | -0,06 | 0,917821097 | -0,22 | 0,702072682 | -0,08 | 0,927735789 | 0,07  | 0,962877841 |
| A230087F16Rik | -0,26 | 0,639960063 | -0,16 | 0,693906911 | 0     | 0,997268369 | 0,37  | 0,597332937 | -0,02 | 0,986849867 |
| A230098N10Rik | 0,28  | 0,597618709 | -0,13 | 0,894669822 | -0,05 | 0,945504473 | 0,32  | 0,563573506 | 0,09  | 0,948935854 |
| A230103J11Rik | -0,05 | 0,94727537  | 0     | 0,998215982 | 0,49  | 0,401629068 | -0,27 | 0,729786741 | -0,15 | 0,879072575 |
| A230107N01Rik | 0,1   | 0,874467978 | 0,23  | 0,812713089 | 0,11  | 0,902549288 | -0,03 | 0,972627967 | 0,16  | 0,8311636   |
| A230108P19Rik | 0,1   | 0,914090929 | -0,04 | 0,956049982 | -0,21 | 0,79007666  | -0,14 | 0,726609135 | -0,1  | 0,903142209 |
| A2m           | 0,26  | 0,874688734 | 0,53  | 0,521714319 | 0,33  | 0,753193013 | -0,88 | 0,104613149 | -0,76 | 0,111570414 |
| A330008L17Rik | 0,2   | 0,828126649 | -0,39 | 0,4666291   | -0,05 | 0,94665439  | 0,31  | 0,560351221 | 0,04  | 0,97872616  |

|               |       |             |       |             |       |             |       |             |       |             |
|---------------|-------|-------------|-------|-------------|-------|-------------|-------|-------------|-------|-------------|
| A330009N23Rik | -0,22 | 0,689253784 | 0,09  | 0,907169389 | 0,25  | 0,646158787 | 0,16  | 0,79070696  | -0,23 | 0,768768194 |
| A330017A19Rik | 0,09  | 0,917014629 | 0,06  | 0,945937822 | -0,37 | 0,528322067 | -0,3  | 0,522613994 | -0,19 | 0,820234867 |
| A330023F24Rik | 0,4   | 0,637102753 | 0,15  | 0,910688765 | -0,05 | 0,98232645  | -1,45 | 0,365687993 | 0,77  | 0,657070737 |
| A330032B11Rik | 0,13  | 0,764288636 | -0,02 | 0,988922072 | -0,24 | 0,687268336 | 0     | 0,996578101 | -0,2  | 0,759161888 |
| A330033J07Rik | 0,4   | 0,570769939 | -0,12 | 0,79336039  | -0,22 | 0,683331533 | 0,15  | 0,899815539 | 0,53  | 0,566248044 |
| A330035P11Rik | 0,19  | 0,828767158 | 0,65  | 0,341114606 | -0,12 | 0,842316119 | -0,66 | 0,279653873 | 0,28  | 0,780418062 |
| A330040F15Rik | 0,15  | 0,721484809 | -0,09 | 0,882847123 | -0,09 | 0,870377336 | 0,13  | 0,729857506 | 0,02  | 0,97975493  |
| A330041J22Rik | -0,09 | 0,903666411 | -0,03 | 0,970762922 | -0,14 | 0,832665595 | 0,25  | 0,545884348 | -0,23 | 0,698525207 |
| A330043C09Rik | 0,14  | 0,800851935 | -0,08 | 0,888070462 | 0,05  | 0,949553487 | -0,03 | 0,955671442 | -0,16 | 0,830086988 |
| A330048O09Rik | -0,1  | 0,897481914 | -0,34 | 0,668737729 | -0,52 | 0,425782502 | -0,01 | 0,981957534 | -0,12 | 0,885777129 |
| A330049N07Rik | 0     | 0,999042849 | 0,07  | 0,904698551 | -0,2  | 0,769583333 | -0,14 | 0,831252023 | 0,09  | 0,92489713  |
| A330050F15Rik | 0,31  | 0,54401985  | -0,02 | 0,980888227 | 0,02  | 0,990836784 | 0,09  | 0,873610553 | -0,03 | 0,980961333 |
| A330069E16Rik | 0,44  | 0,389268664 | 0,06  | 0,901000778 | -0,26 | 0,765490406 | -0,04 | 0,95852873  | 0,26  | 0,697818445 |
| A330070K13Rik | -0,07 | 0,89763852  | 0,09  | 0,920577656 | 0,02  | 0,987390039 | 0,29  | 0,580192488 | 0,6   | 0,440295586 |
| A330076C08Rik | 0,09  | 0,894680136 | -0,27 | 0,751116121 | 0,15  | 0,822887916 | 0,04  | 0,953429313 | 0,3   | 0,60105426  |
| A330076H08Rik | 0,37  | 0,425529405 | 0,03  | 0,987632176 | 0,16  | 0,729031049 | -0,2  | 0,809498568 | -0,23 | 0,829615181 |
| A330093E20Rik | 0,31  | 0,584696696 | -0,25 | 0,615311543 | -0,03 | 0,976042637 | 0,21  | 0,712115859 | -0,11 | 0,912164806 |
| A330094K24Rik | 0,08  | 0,910211895 | -0,1  | 0,855632384 | 0,01  | 0,990836784 | 0,2   | 0,635869722 | 0,36  | 0,524086785 |
| A330102I10Rik | 0,39  | 0,676438091 | 0,07  | 0,954502447 | -0,31 | 0,765490406 | -0,28 | 0,673976823 | -0,07 | 0,932268703 |
| A3galt2       | 0,42  | 0,814150754 | 1,18  | 0,46415666  | -0,23 | 0,898935616 | -1,47 | 0,134105227 | -0,35 | 0,592505698 |
| A430005L14Rik | -0,16 | 0,856984761 | 0,05  | 0,936792848 | -0,15 | 0,903942509 | -0,2  | 0,756331836 | -0,01 | 0,992370267 |
| A430010J10Rik | 0,02  | 0,983516046 | 0,42  | 0,546908088 | 0,29  | 0,702677589 | -0,11 | 0,763366023 | 0,3   | 0,568291477 |
| A430018G15Rik | 0,42  | 0,511167568 | 0,19  | 0,818072947 | 0,33  | 0,669266652 | -1,54 | 0,34722487  | -0,68 | 0,736133095 |
| A430027H14Rik | -0,13 | 0,86343981  | -0,03 | 0,972448487 | -0,13 | 0,8305335   | -0,1  | 0,805169421 | 0,09  | 0,903153151 |
| A430033K04Rik | -0,44 | 0,698332739 | 0,04  | 0,966078321 | -0,03 | 0,985977985 | -1,31 | 0,019615463 | -0,25 | 0,767310323 |
| A430035B10Rik | -0,14 | 0,793209485 | 0,3   | 0,629493333 | -0,17 | 0,819509208 | -0,14 | 0,865534768 | 0,06  | 0,968348427 |
| A430046D13Rik | 0,1   | 0,892823025 | -0,23 | 0,62432723  | -0,08 | 0,913333366 | 0,13  | 0,830247309 | -0,28 | 0,720844381 |
| A430048G15Rik | 0,05  | 0,948538969 | 0,28  | 0,63903111  | -0,16 | 0,802534871 | -0,08 | 0,922740736 | 0,04  | 0,980945466 |
| A430057M04Rik | 0,26  | 0,672934635 | 0,39  | 0,600926833 | -0,12 | 0,899913569 | 0,27  | 0,777673386 | 0,03  | 0,984632256 |
| A430060F13Rik | 0,23  | 0,600952042 | -0,5  | 0,539322374 | 0,12  | 0,916403684 | 0,49  | 0,431974229 | 0,29  | 0,587305934 |
| A430072P03Rik | 0,01  | 0,984972115 | 0,21  | 0,808222835 | -0,18 | 0,742758388 | -0,15 | 0,72440892  | 0,13  | 0,858872204 |
| A430078G23Rik | 0,3   | 0,622541886 | -0,4  | 0,565603216 | -0,25 | 0,640703366 | 0,18  | 0,785411    | 0,01  | 0,993413582 |
| A430078I02Rik | -0,21 | 0,702406672 | 0,36  | 0,859954464 | -0,58 | 0,501664412 | -0,11 | 0,908916282 | 0,34  | 0,823098095 |
| A430088P11Rik | 0,05  | 0,950897622 | 0,23  | 0,589994463 | 0,02  | 0,985977985 | -0,15 | 0,736730464 | 0,64  | 0,382239908 |
| A430089I19Rik | -0,26 | 0,87446603  | 0,44  | 0,809683705 | 0,13  | 0,955984004 | -0,9  | 0,229440004 | 0,16  | 0,792305774 |

|               |       |             |       |             |       |             |       |             |       |             |
|---------------|-------|-------------|-------|-------------|-------|-------------|-------|-------------|-------|-------------|
| A430090L17Rik | -0,26 | 0,704646948 | -0,46 | 0,604972798 | -0,12 | 0,932022751 | 0,42  | 0,477503193 | -0,07 | 0,952718905 |
| A430093F15Rik | 0,35  | 0,467970288 | 0,15  | 0,884239192 | -0,68 | 0,209534486 | -0,62 | 0,085628571 | -0,57 | 0,395499484 |
| A430105I19Rik | -0,33 | 0,59108421  | 0,17  | 0,812459283 | 0,03  | 0,983917018 | 0,77  | 0,48728376  | 0,38  | 0,784547507 |
| A430105J06Rik | 0,41  | 0,568473441 | -0,11 | 0,89205859  | -0,08 | 0,926566777 | -0,15 | 0,865444639 | 0,19  | 0,816663211 |
| A430107J10Rik | 0,94  | 0,321181267 | -0,28 | 0,499573414 | 0,04  | 0,95633676  | 0     | 1           | 0,65  | 0,429206436 |
| A430108G06Rik | -0,41 | 0,487756981 | -0,04 | 0,970437908 | 0,03  | 0,976042637 | -0,18 | 0,804895826 | -0,61 | 0,394310393 |
| A430110L20Rik | -0,2  | 0,801984719 | 0,28  | 0,729957667 | 0,32  | 0,777417583 | -0,71 | 0,534683089 | 0,58  | 0,631479776 |
| A4galt        | 0,2   | 0,811215544 | -0,1  | 0,855632384 | -0,11 | 0,953975807 | 2,34  | 0,021725991 | -0,9  | 0,113935413 |
| A4gnt         | -0,08 | 0,90742841  | 0,14  | 0,774278866 | -0,13 | 0,879018166 | -0,05 | 0,910298592 | -0,06 | 0,955910202 |
| A530006G24Rik | -0,4  | 0,477363665 | -0,44 | 0,568187167 | 0,15  | 0,887630371 | 0,31  | 0,350852228 | 0,26  | 0,657070737 |
| A530010F05Rik | 0,17  | 0,654324758 | -0,1  | 0,847885195 | -0,07 | 0,922318683 | 0,18  | 0,70813238  | -0,07 | 0,933307994 |
| A530010L16Rik | 0,14  | 0,802251636 | 0,16  | 0,934627513 | -0,06 | 0,961354621 | 0,13  | 0,889515057 | 0,52  | 0,537589934 |
| A530013C23Rik | -0,21 | 0,786363142 | 0,1   | 0,836702334 | 0,3   | 0,668408831 | 0,09  | 0,900691702 | 0,07  | 0,928724353 |
| A530016L24Rik | -0,01 | 0,991919022 | 0,02  | 0,991847268 | -0,32 | 0,61736568  | -0,1  | 0,841644929 | -0,08 | 0,91314596  |
| A530017D24Rik | 0,23  | 0,702135398 | 0,2   | 0,747707816 | 0,17  | 0,83900004  | -0,59 | 0,287663994 | -0,25 | 0,768823429 |
| A530020G20Rik | 0,08  | 0,90651164  | 0,29  | 0,647475869 | -0,47 | 0,530603857 | -0,18 | 0,756850607 | -0,38 | 0,587305934 |
| A530021J07Rik | 0,37  | 0,336543382 | 0,32  | 0,699023364 | -0,28 | 0,693655482 | -0,42 | 0,241841256 | 0,21  | 0,825990389 |
| A530032D15Rik | 0,13  | 0,792735264 | -0,01 | 1           | -1,28 | 0,068894819 | -0,1  | 0,917756311 | 0,59  | 0,551972106 |
| A530040E14Rik | 1,46  | 0,101905306 | -0,69 | 0,490467294 | 0,17  | 0,898382247 | 0,44  | 0,700924597 | 1,32  | 0,206231263 |
| A530046M15Rik | 0,3   | 0,663447662 | -0,47 | 0,281146408 | 0,28  | 0,674635384 | 0,22  | 0,603611964 | 0,17  | 0,861977667 |
| A530050N04Rik | 0,38  | 0,357553901 | 0,19  | 0,807463629 | -0,15 | 0,861837147 | -0,02 | 0,980724248 | -0,04 | 0,969617491 |
| A530053G22Rik | 0,12  | 0,890406845 | 0,11  | 0,909329669 | -0,15 | 0,791955135 | 0,08  | 0,932800758 | -0,1  | 0,928724353 |
| A530058N18Rik | -0,03 | 0,970078059 | -0,13 | 0,936428009 | 0,44  | 0,549895527 | -0,02 | 0,971544081 | 0,28  | 0,664771836 |
| A530064D06Rik | 0,77  | 0,277154156 | 0,49  | 0,637134628 | 0,37  | 0,887630371 | -0,15 | 0,871925977 | 0,16  | 0,904656948 |
| A530065N20Rik | 0,21  | 0,67806773  | -0,03 | 0,97829024  | 0,25  | 0,660610212 | 0,04  | 0,943143586 | 0,04  | 0,973428839 |
| A530072M11Rik | 0,3   | 0,480468471 | 0,23  | 0,732847182 | 0,09  | 0,926566777 | 0,08  | 0,94649023  | 0,5   | 0,699996356 |
| A530076I17Rik | 0,1   | 0,858748956 | -0,03 | 0,948287251 | -0,08 | 0,898382247 | 0,08  | 0,855472984 | 0,1   | 0,890833196 |
| A530079E22Rik | 0,08  | 0,854588321 | 0     | 1           | -0,01 | 0,992919703 | -0,01 | 0,976503337 | -0,09 | 0,89529118  |
| A530083I20Rik | 0,01  | 0,989030713 | -0,22 | 0,804394095 | -0,34 | 0,507425636 | -0,17 | 0,809775652 | -0,12 | 0,890297784 |
| A530088E08Rik | 0,03  | 0,975788214 | 0,2   | 0,664787536 | -0,37 | 0,479168256 | -0,03 | 0,959399629 | 0     | 0,996197742 |
| A530095I07Rik | 0,18  | 0,869225685 | -0,16 | 0,89034555  | 0,04  | 0,960677449 | -0,61 | 0,50154653  | -0,61 | 0,267361963 |
| A530099J19Rik | 0,1   | 0,888284012 | 0     | 1           | -0,03 | 0,970482174 | 0,29  | 0,52143909  | -0,09 | 0,920803929 |
| A630001G21Rik | 0,18  | 0,790008568 | -0,16 | 0,934075438 | -0,12 | 0,905799178 | 0,2   | 0,815089205 | 0,54  | 0,308639941 |
| A630001O12Rik | 0,11  | 0,805313174 | 0,1   | 0,856242883 | -0,23 | 0,716743339 | -0,04 | 0,929835301 | -0,06 | 0,947559952 |
| A630009H07Rik | 0,18  | 0,806491264 | 0,11  | 0,831404974 | 0,17  | 0,777417583 | -1,48 | 0,074454367 | -0,74 | 0,31972789  |

|               |       |             |       |             |       |             |       |             |       |             |
|---------------|-------|-------------|-------|-------------|-------|-------------|-------|-------------|-------|-------------|
| A630010A05Rik | 0,01  | 0,991516118 | -0,09 | 0,9502116   | -0,03 | 0,976092199 | 0,12  | 0,748470342 | -0,1  | 0,88282824  |
| A630012P03Rik | -0,26 | 0,533189619 | -0,13 | 0,859954464 | 0,33  | 0,569619692 | 0,24  | 0,816901896 | 0,15  | 0,919507597 |
| A630014C17Rik | 0,23  | 0,707070061 | -0,04 | 0,958545812 | -0,24 | 0,684455958 | -0,02 | 0,970163463 | -0,36 | 0,57707001  |
| A630019I02Rik | -0,02 | 0,978666542 | -0,17 | 0,839673299 | -0,37 | 0,370554673 | 0,02  | 0,974835696 | -0,14 | 0,866285506 |
| A630020A06    | -0,04 | 0,937251448 | 0,01  | 0,993800088 | -0,17 | 0,770526999 | -0,17 | 0,743170266 | -0,02 | 0,990091016 |
| A630023A22Rik | 0,32  | 0,540631711 | 0,84  | 0,138101221 | -0,02 | 0,982305856 | 0,47  | 0,597332937 | 0,3   | 0,795434285 |
| A630023P12Rik | 0,22  | 0,734622176 | 0,1   | 0,86297915  | 0,04  | 0,95204022  | 0,05  | 0,914500436 | 0,52  | 0,490805598 |
| A630031M04Rik | 0,01  | 0,991216662 | 0,28  | 0,716437544 | -0,48 | 0,48646529  | -0,08 | 0,879527088 | -0,22 | 0,74624632  |
| A630033H20Rik | 0     | 0,999288019 | -0,37 | 0,852910484 | 0,67  | 0,372318571 | -2,31 | 0,097710906 | -1,8  | 0,172959768 |
| A630038E17Rik | 0,12  | 0,764288636 | 0,02  | 0,982420791 | -0,06 | 0,93077684  | -0,01 | 0,982534991 | 0,03  | 0,972590168 |
| A630050E04Rik | 0,07  | 0,897759442 | 0,11  | 0,82263744  | -0,21 | 0,699814824 | -0,18 | 0,680241524 | -0,04 | 0,969617491 |
| A630052C17Rik | -0,14 | 0,799290107 | -0,01 | 0,994486533 | -0,35 | 0,591420507 | 0     | 0,997598211 | 0,38  | 0,498598092 |
| A630066F11Rik | -0,19 | 0,788231572 | -0,27 | 0,672585032 | 0,12  | 0,909963525 | -0,34 | 0,889364462 | 0,01  | 0,996463857 |
| A630072L19Rik | -0,04 | 0,970286316 | 0,1   | 0,881113709 | -0,34 | 0,621644149 | 0,22  | 0,647539037 | -0,1  | 0,885872093 |
| A630072M18Rik | 0,05  | 0,96063273  | 0,11  | 0,815973308 | 0,22  | 0,740220539 | 0,2   | 0,588987424 | 0,07  | 0,933307994 |
| A630073D07Rik | -0,04 | 0,950532575 | 0,51  | 0,623550133 | -0,22 | 0,837959918 | -0,26 | 0,680245242 | 0,13  | 0,916912141 |
| A630075F10Rik | -0,05 | 0,94739162  | 0,11  | 0,894274965 | -0,33 | 0,582116339 | -0,15 | 0,748258647 | 0,23  | 0,728388857 |
| A630076J17Rik | 0,01  | 0,996063797 | -0,1  | 0,853874506 | -0,11 | 0,85833551  | 0,19  | 0,694114946 | -0,35 | 0,566248044 |
| A630077J23Rik | -0,3  | 0,66609472  | -0,32 | 0,615968604 | -0,12 | 0,867152476 | -1,32 | 0,500410075 | -0,4  | 0,885872093 |
| A630089N07Rik | 0,11  | 0,945677516 | -1,09 | 0,359483031 | -0,52 | 0,628048897 | 0,39  | 0,562086134 | 0,11  | 0,956585095 |
| A630091E08Rik | 0,25  | 0,577809864 | -0,16 | 0,769360279 | 0,04  | 0,974887915 | 0,24  | 0,617056035 | -0,26 | 0,782909838 |
| A630095E13Rik | -0,24 | 0,568473441 | 0,59  | 0,536246395 | 0,71  | 0,452731181 | -0,23 | 0,747451487 | -0,14 | 0,918288793 |
| A630095N17Rik | 0,19  | 0,735596307 | -0,09 | 0,910193022 | -0,36 | 0,518028029 | -0,1  | 0,785670539 | -0,07 | 0,932846086 |
| A730009L09Rik | 0,06  | 0,906587855 | -0,03 | 0,958856577 | -0,03 | 0,965320334 | 0,08  | 0,85301747  | 0,04  | 0,961406182 |
| A730011C13Rik | -0,06 | 0,922541012 | 0,22  | 0,837480636 | -0,21 | 0,798047198 | -0,06 | 0,908141892 | 0,11  | 0,883732171 |
| A730013G03Rik | -0,01 | 0,983500773 | 0,21  | 0,831580851 | -0,07 | 0,928438649 | -0,14 | 0,71158821  | 0,19  | 0,785640104 |
| A730015C16Rik | 0,22  | 0,785400637 | 0,27  | 0,738762579 | -0,33 | 0,628978443 | 0,35  | 0,299250778 | 0,56  | 0,217859301 |
| A730017C20Rik | 0,29  | 0,473832525 | 0,19  | 0,804576975 | -0,22 | 0,881924837 | -0,53 | 0,46809054  | -0,21 | 0,877020459 |
| A730017L22Rik | 0,07  | 0,925019201 | -0,1  | 0,940269529 | -0,86 | 0,128854948 | -0,23 | 0,819736952 | -0,72 | 0,424301504 |
| A730018C14Rik | -0,07 | 0,915858963 | 0,08  | 0,903682621 | -0,15 | 0,872844733 | -0,11 | 0,859783    | -0,68 | 0,381160171 |
| A730020E08Rik | 0,08  | 0,946082673 | -0,14 | 0,932292974 | 0,41  | 0,578081257 | 0,85  | 0,346825441 | -0,39 | 0,550083777 |
| A730020M07Rik | -0,11 | 0,886680488 | 0,57  | 0,655607331 | -0,3  | 0,588987171 | -0,15 | 0,841644929 | 0,17  | 0,799638391 |
| A730028G07Rik | -0,81 | 0,279256257 | 0,13  | 0,802440628 | 0,73  | 0,32492577  | -0,57 | 0,446858732 | -0,27 | 0,80222716  |
| A730036I17Rik | 0,29  | 0,642618049 | 0,14  | 0,928824349 | -0,32 | 0,582354254 | -0,28 | 0,730274025 | -0,24 | 0,765327693 |
| A730043L09Rik | 0,17  | 0,737459992 | 0,15  | 0,877840602 | -0,65 | 0,420728336 | -0,14 | 0,794119968 | 0,4   | 0,583434544 |

|               |       |             |       |             |       |             |       |             |       |             |
|---------------|-------|-------------|-------|-------------|-------|-------------|-------|-------------|-------|-------------|
| A730045E13Rik | 0,36  | 0,551534138 | 0,04  | 0,956555856 | -0,05 | 0,959981309 | -0,09 | 0,87630843  | 0,02  | 0,982611614 |
| A730046J19Rik | -0,1  | 0,910480686 | 0,09  | 0,892869412 | -0,03 | 0,973302481 | -0,18 | 0,660476554 | -0,32 | 0,676132909 |
| A730049H05Rik | -0,36 | 0,321181267 | 0,11  | 0,855632384 | -0,07 | 0,920828015 | 0,32  | 0,52980423  | -0,11 | 0,887859063 |
| A730056A06Rik | 0,36  | 0,412607475 | 0,33  | 0,764299173 | -0,1  | 0,941718633 | -0,67 | 0,135162516 | -0,09 | 0,950211199 |
| A730060N03Rik | 0,19  | 0,708991824 | -0,08 | 0,847166413 | 0,01  | 0,991018097 | 0,05  | 0,899335603 | -0,06 | 0,939448119 |
| A730061H03Rik | -0,03 | 0,966775766 | -0,61 | 0,428913843 | 0,59  | 0,446117324 | 0,94  | 0,114189779 | 0     | 0,99981982  |
| A730063M14Rik | 0,15  | 0,822613889 | -0,37 | 0,317962714 | 0,26  | 0,68573346  | 0,39  | 0,642796926 | 0,03  | 0,983469081 |
| A730081D07Rik | 0,26  | 0,848780666 | 0,08  | 0,9369583   | -0,07 | 0,973439668 | -0,19 | 0,886769103 | -0,05 | 0,986971861 |
| A730082K24Rik | 0,41  | 0,3398247   | -0,15 | 0,944438314 | -0,2  | 0,705811313 | 0,01  | 0,992906132 | -0,04 | 0,9651757   |
| A730085E03Rik | -0,27 | 0,533225477 | -0,01 | 0,992175086 | -0,06 | 0,94031086  | -0,07 | 0,875265854 | 0,06  | 0,939948423 |
| A730085K08Rik | -0,03 | 0,969592977 | 0,05  | 0,925981858 | -0,17 | 0,798348773 | 0,29  | 0,42767181  | 0,12  | 0,909363599 |
| A730089K16Rik | 0,07  | 0,885072489 | 0,03  | 0,954378914 | -0,15 | 0,79541037  | 0     | 1           | -0,07 | 0,92741476  |
| A730090N16Rik | 0,09  | 0,933352858 | -0,16 | 0,910022982 | -0,2  | 0,773365699 | 0,52  | 0,570883779 | 0,12  | 0,901341817 |
| A730099G02Rik | 0,07  | 0,898269435 | 0,09  | 0,869927431 | -0,03 | 0,963199274 | -0,04 | 0,932275591 | 0,01  | 0,985269236 |
| A830005F24Rik | -0,06 | 0,913425276 | 0,02  | 0,985764487 | 0,02  | 0,985347628 | 0,27  | 0,561656192 | 0,16  | 0,861977667 |
| A830009L08Rik | 0,03  | 0,963378584 | 0,46  | 0,520091555 | -0,33 | 0,53364134  | 0,19  | 0,658351901 | 0,19  | 0,782889048 |
| A830010M20Rik | -0,06 | 0,968252417 | -0,64 | 0,60727944  | 0,49  | 0,548288344 | -0,52 | 0,204285479 | -0,22 | 0,814438115 |
| A830011I04    | 0,18  | 0,865100674 | -0,13 | 0,831404974 | -0,01 | 0,992208176 | 0,21  | 0,62733822  | 0,62  | 0,337492586 |
| A830011K09Rik | 0,28  | 0,558653062 | 0,05  | 0,916176914 | -0,3  | 0,571271301 | -0,06 | 0,949342852 | -0,05 | 0,962820357 |
| A830012C17Rik | 0,01  | 0,990717834 | -0,07 | 0,932292974 | 0,09  | 0,880706627 | 0,18  | 0,660110505 | 0,12  | 0,890411926 |
| A830018L16Rik | 0,48  | 0,357036798 | -0,21 | 0,824927818 | 0,1   | 0,906097666 | 0,42  | 0,420230025 | 0,2   | 0,796910241 |
| A830019L24Rik | 0,17  | 0,713788238 | 0,07  | 0,935041212 | -0,18 | 0,794194778 | -0,04 | 0,941639261 | -0,2  | 0,754213422 |
| A830029E22Rik | -0,05 | 0,932059519 | 0,07  | 0,870103107 | -0,28 | 0,683917899 | -0,05 | 0,908792069 | 0,02  | 0,980961333 |
| A830031A19Rik | -0,23 | 0,613990129 | 0,05  | 0,97193242  | -0,01 | 0,991456043 | 0,14  | 0,87148686  | 0,29  | 0,765419939 |
| A830035A12Rik | -0,01 | 0,991216662 | -0,27 | 0,57861935  | -0,24 | 0,659712518 | -0,08 | 0,839534014 | -0,11 | 0,928724353 |
| A830036E02Rik | 0,46  | 0,615064142 | -0,35 | 0,761929694 | 0,02  | 0,987504853 | 0,43  | 0,289154208 | -0,16 | 0,789358981 |
| A830039N20Rik | -0,13 | 0,747663533 | -0,02 | 0,970832543 | -0,09 | 0,873756849 | 0,06  | 0,88335157  | 0,09  | 0,952299975 |
| A830052D11Rik | -0,06 | 0,911399028 | -0,2  | 0,824372931 | 0,31  | 0,647928093 | -0,01 | 0,984196571 | -0,36 | 0,6754671   |
| A830073O21Rik | 0,07  | 0,909257268 | 0,03  | 0,977103763 | -0,16 | 0,877598693 | -0,12 | 0,749715866 | 0,12  | 0,928724353 |
| A830080D01Rik | 0,27  | 0,860773832 | 0,68  | 0,363919957 | -0,61 | 0,379638471 | -1,19 | 0,02663501  | 0,45  | 0,715879151 |
| A830082K12Rik | 0,65  | 0,645057952 | -0,26 | 0,823530278 | -0,46 | 0,621644149 | -0,25 | 0,629687493 | 0,46  | 0,536721752 |
| A830082N09Rik | -0,04 | 0,955200574 | -0,22 | 0,646984591 | -0,18 | 0,789969951 | 0,02  | 0,95956355  | -0,15 | 0,82517732  |
| A830092H15Rik | 0,01  | 0,991919022 | -0,15 | 0,796482292 | -0,37 | 0,452731181 | -0,19 | 0,771144265 | -0,34 | 0,550083777 |
| A930001A20Rik | 0,01  | 0,983516046 | -0,25 | 0,716661568 | -0,13 | 0,83818085  | 0,14  | 0,716994919 | 0,1   | 0,918797466 |
| A930001C03Rik | 0,1   | 0,934675994 | -0,01 | 0,999210601 | -0,25 | 0,74783501  | 0     | 1           | 0,26  | 0,711637936 |

|               |       |             |       |             |       |             |       |             |       |             |
|---------------|-------|-------------|-------|-------------|-------|-------------|-------|-------------|-------|-------------|
| A930002C04Rik | -0,11 | 0,849751597 | -0,19 | 0,813516293 | -0,03 | 0,977897176 | -0,07 | 0,866172892 | -0,04 | 0,977903513 |
| A930002H24Rik | 0,42  | 0,302006612 | -0,13 | 0,747960694 | -0,19 | 0,809137779 | 0,4   | 0,598473186 | 0,49  | 0,567306543 |
| A930002I21Rik | -0,04 | 0,94326605  | -0,02 | 0,984710854 | -0,12 | 0,872366734 | 0,36  | 0,387999282 | 0,17  | 0,770722314 |
| A930003A15Rik | 0,19  | 0,823462545 | -0,33 | 0,661976216 | 0,42  | 0,562427034 | -0,03 | 0,982534991 | -0,34 | 0,799584228 |
| A930003O13Rik | -0,06 | 0,954349573 | 0,57  | 0,370515616 | -0,42 | 0,563650445 | -0,12 | 0,837258999 | -0,13 | 0,90945413  |
| A930004D18Rik | -0,07 | 0,899079341 | -0,01 | 0,99305294  | 0,03  | 0,986853659 | -0,01 | 0,98922569  | -0,16 | 0,880556628 |
| A930005H10Rik | 0,25  | 0,727387897 | 0,93  | 0,680709276 | -0,28 | 0,841942589 | -1,55 | 0,285871943 | 0,25  | 0,813513601 |
| A930006D01Rik | 0,2   | 0,623941869 | -0,02 | 0,97875059  | -0,36 | 0,465949919 | 0,11  | 0,814762053 | 0,3   | 0,605542836 |
| A930006I01Rik | 0,21  | 0,64776317  | 0,09  | 0,849511429 | 0     | 0,996397104 | 0,01  | 0,991717124 | 0,19  | 0,736133095 |
| A930006K02Rik | -0,5  | 0,454356317 | -0,44 | 0,665191395 | 0,21  | 0,894239558 | 0,13  | 0,876468647 | -0,35 | 0,662029815 |
| A930007A09Rik | -0,39 | 0,563324448 | 0,3   | 0,585443341 | -0,25 | 0,772829778 | -0,33 | 0,69892094  | -0,56 | 0,713218958 |
| A930007I19Rik | -0,1  | 0,898572877 | -0,12 | 0,892727342 | 0,12  | 0,879801478 | 0,05  | 0,958240929 | 0,12  | 0,917844354 |
| A930009A15Rik | 0,17  | 0,786363142 | 0,13  | 0,900801202 | -0,34 | 0,448792101 | -0,02 | 0,968211182 | 0,01  | 0,991559961 |
| A930011G23Rik | -0,08 | 0,907472618 | -0,22 | 0,839789639 | -0,22 | 0,694941328 | 0,31  | 0,595204565 | -0,04 | 0,971058066 |
| A930012L18Rik | -0,54 | 0,386425394 | -0,15 | 0,804868131 | -0,81 | 0,299010171 | -0,91 | 0,414522125 | -0,3  | 0,860591136 |
| A930012O16Rik | -0,25 | 0,736648392 | 0     | 1           | -0,14 | 0,830336321 | -0,51 | 0,178191962 | -0,12 | 0,885872093 |
| A930013F10Rik | -0,04 | 0,957820843 | 0,38  | 0,494858163 | -0,32 | 0,634936323 | -0,42 | 0,258984285 | -0,19 | 0,728455827 |
| A930015D03Rik | 0,14  | 0,919129818 | 0,52  | 0,582502577 | 0,08  | 0,94940954  | -0,31 | 0,565906862 | 0,99  | 0,103208118 |
| A930016O22Rik | -0,09 | 0,936611783 | -0,37 | 0,638366221 | -0,09 | 0,916690816 | -0,05 | 0,958172386 | -0,04 | 0,975441362 |
| A930017K11Rik | 0,45  | 0,279583729 | 0,5   | 0,396204581 | -0,13 | 0,834406595 | 0,35  | 0,463963073 | 0,19  | 0,757674948 |
| A930017M01Rik | -0,02 | 0,966306117 | -0,06 | 0,915565977 | -0,13 | 0,856046789 | 0,05  | 0,915691108 | -0,15 | 0,831834722 |
| A930018M24Rik | 0,05  | 0,944759048 | -0,18 | 0,785065747 | 0,06  | 0,938771378 | 0,24  | 0,571158422 | -0,01 | 0,991559961 |
| A930018P22Rik | -0,24 | 0,619769947 | 0,17  | 0,815317911 | 0,05  | 0,952104131 | -0,35 | 0,522565631 | -0,77 | 0,331553232 |
| A930019D19Rik | -0,02 | 0,976574175 | 0,15  | 0,738762579 | -0,07 | 0,919754592 | 0,08  | 0,818485589 | 0,06  | 0,937446198 |
| A930024E05Rik | 0,1   | 0,878548823 | 0,07  | 0,943713379 | 0,05  | 0,953645406 | -0,02 | 0,983166423 | 0,16  | 0,811290509 |
| A930024N18Rik | -0,31 | 0,580909375 | -0,23 | 0,600385993 | -0,29 | 0,555425727 | 0,04  | 0,942537062 | -0,25 | 0,701874538 |
| A930029G22Rik | 0,27  | 0,6226265   | -0,19 | 0,715688609 | 0,11  | 0,912060708 | 0,2   | 0,672057557 | 0,37  | 0,570939418 |
| A930031H19Rik | 0,16  | 0,744352714 | 0,71  | 0,312857159 | -0,55 | 0,341648319 | -0,17 | 0,810891431 | -0,01 | 0,990654438 |
| A930033H14Rik | -0,49 | 0,392723343 | 0,07  | 0,911283399 | -0,27 | 0,850171327 | 0,02  | 0,983166423 | 0,13  | 0,937446198 |
| A930038B10Rik | -0,68 | 0,214430522 | -0,17 | 0,866844066 | -0,11 | 0,902672106 | 0,12  | 0,882842038 | -0,01 | 0,992370267 |
| A930041C12Rik | -0,16 | 0,804352651 | -0,03 | 0,983071427 | -0,31 | 0,641775458 | -0,04 | 0,94835703  | -0,07 | 0,951544448 |
| A930104D05Rik | 0,06  | 0,95176371  | -0,12 | 0,818485287 | 0,02  | 0,987390039 | 0,02  | 0,965653854 | 0,15  | 0,793839436 |
| AA066038      | 0,03  | 0,966775766 | 0,03  | 0,955424071 | -0,09 | 0,874098993 | 0,1   | 0,838806433 | 0,17  | 0,827532593 |
| AA386476      | -0,31 | 0,593540946 | -0,06 | 0,955891382 | -0,34 | 0,508726004 | -0,16 | 0,741026165 | -0,2  | 0,823922673 |
| AA387200      | 0,21  | 0,723825599 | 0,01  | 0,987867499 | -0,32 | 0,588987171 | 0,16  | 0,68478797  | 0,14  | 0,824818547 |

|          |       |             |       |             |       |             |       |             |       |             |
|----------|-------|-------------|-------|-------------|-------|-------------|-------|-------------|-------|-------------|
| AA387883 | 0,34  | 0,414026998 | 0,24  | 0,651587568 | -0,17 | 0,775367269 | -0,05 | 0,896599656 | 0,09  | 0,909363599 |
| AA388235 | 0     | 0,999246496 | -0,06 | 0,894278094 | 0,14  | 0,841563482 | 0,19  | 0,794327559 | -0,07 | 0,956274648 |
| AA414992 | 0,14  | 0,758067417 | 0,07  | 0,884239192 | -0,08 | 0,908400411 | 0,09  | 0,822355466 | -0,09 | 0,891759018 |
| AA415398 | 0,49  | 0,460654094 | 0,58  | 0,49252156  | -0,04 | 0,982305856 | -0,77 | 0,173600687 | 0     | 0,998748098 |
| AA465934 | -0,07 | 0,948926586 | 0,72  | 0,65041955  | 0,45  | 0,654328013 | -0,68 | 0,449202754 | -0,2  | 0,883592868 |
| AA467197 | 1,5   | 0,074890017 | 1,25  | 0,081051183 | -1,83 | 0,03294007  | 3,57  | 0,003907268 | 3,35  | 0,001206177 |
| AA474408 | 0,11  | 0,922118639 | 0,38  | 0,400515868 | -0,25 | 0,73635252  | -1,31 | 0,074454367 | 0,12  | 0,914577351 |
| AA536875 | 0,09  | 0,910353958 | -0,01 | 0,9860901   | 0,15  | 0,831275588 | 0,01  | 0,986768223 | -0,04 | 0,97872616  |
| AA543186 | -0,25 | 0,66331039  | -0,52 | 0,404698188 | 0,25  | 0,729031049 | 0,02  | 0,97291242  | -0,45 | 0,740213618 |
| AA545190 | 0,2   | 0,78999702  | -0,04 | 0,966717367 | -0,05 | 0,948386318 | -0,18 | 0,76240803  | -0,07 | 0,93957001  |
| AA619741 | -0,12 | 0,797024882 | 0,14  | 0,853193813 | -0,18 | 0,828046841 | -0,09 | 0,81096279  | -0,39 | 0,54819971  |
| AA623943 | 0,25  | 0,709394567 | -0,15 | 0,882589938 | -0,06 | 0,946777487 | 0,18  | 0,679463308 | 0,02  | 0,985448733 |
| AA666905 | 0,07  | 0,890332011 | 0,18  | 0,738010919 | 0,01  | 0,990836784 | -0,11 | 0,794165367 | 0     | 0,994270272 |
| AA667203 | 0,81  | 0,365873297 | 0,03  | 0,954024651 | -0,37 | 0,641439342 | 0,3   | 0,402419143 | -0,06 | 0,96216784  |
| AA672651 | -0,14 | 0,755761347 | 0     | 0,999661053 | 0,03  | 0,960492934 | 0,02  | 0,980883383 | 0,02  | 0,990091016 |
| AA684185 | -0,05 | 0,935767468 | -0,22 | 0,680709276 | 0,05  | 0,961776439 | 0,63  | 0,300803292 | 0,41  | 0,518861147 |
| AA692955 | 0,15  | 0,824728873 | -0,78 | 0,446315327 | -0,07 | 0,922751355 | 1,28  | 0,036841765 | 0,35  | 0,696450271 |
| AA792892 | 1,09  | 0,455526465 | 0,46  | 0,751382934 | -0,65 | 0,691268573 | -0,92 | 0,502230334 | -0,46 | 0,711198511 |
| AA986860 | 0,36  | 0,536274184 | -0,34 | 0,746439988 | 0,1   | 0,929395646 | -0,65 | 0,092120463 | 0,12  | 0,922151079 |
| Aaas     | -0,8  | 0,104092085 | -0,87 | 0,22001825  | 0,48  | 0,689348317 | 0,8   | 0,151229081 | -0,38 | 0,697818445 |
| Aacs     | -0,05 | 0,946792769 | -0,22 | 0,683761476 | 0,59  | 0,179552168 | 0,71  | 0,168967728 | 0,06  | 0,952971656 |
| Aadac    | 0,08  | 0,921111827 | -0,47 | 0,517288934 | -0,33 | 0,552356597 | -0,12 | 0,879527088 | 0,26  | 0,885318142 |
| Aadacl2  | 0,27  | 0,689991112 | 0,06  | 0,912773944 | 0,04  | 0,979791644 | -0,57 | 0,230415121 | -0,13 | 0,885919236 |
| Aadacl3  | -0,13 | 0,782843376 | 0,3   | 0,491209341 | 0,27  | 0,729031049 | -0,24 | 0,752708491 | 0,03  | 0,979643119 |
| Aadat    | 0,18  | 0,807188427 | 0,28  | 0,700297886 | -0,32 | 0,647014995 | -1,87 | 0,116376826 | 0,05  | 0,983469081 |
| Aaed1    | -0,16 | 0,842639118 | 0,09  | 0,926157704 | 0,47  | 0,700200486 | 0,5   | 0,481322888 | -0,47 | 0,587019749 |
| Aagab    | -0,81 | 0,418094374 | 0,27  | 0,777979675 | -0,81 | 0,534543192 | -0,13 | 0,90213506  | -0,36 | 0,776892362 |
| Aak1     | -0,51 | 0,548019473 | 0,35  | 0,688450928 | 0,2   | 0,824571648 | -0,34 | 0,473035898 | -0,36 | 0,574285481 |
| Aamdc    | -0,36 | 0,553920143 | -0,01 | 0,994567885 | -0,05 | 0,956894731 | -0,52 | 0,356776772 | 0,23  | 0,791499339 |
| Aamp     | -0,12 | 0,787272049 | -0,15 | 0,796752633 | 0,18  | 0,689968482 | 0,33  | 0,476414891 | 0,02  | 0,979456872 |
| Aanat    | 0,56  | 0,356353147 | -0,15 | 0,776548278 | -0,05 | 0,957152002 | 0,44  | 0,254212331 | 0,38  | 0,545867782 |
| Aar2     | -0,01 | 0,992069427 | 0,37  | 0,680709276 | -0,41 | 0,656894717 | -0,41 | 0,523255995 | 0,03  | 0,975441362 |
| Aard     | 0,17  | 0,701391957 | -0,11 | 0,798684194 | -0,33 | 0,606153306 | 0,06  | 0,919889648 | 0,04  | 0,973428839 |
| Aars     | 0,09  | 0,864368309 | 0,14  | 0,842145037 | 0,33  | 0,624235852 | 0,87  | 0,152664843 | 1,11  | 0,063347582 |
| Aars2    | -0,43 | 0,278121865 | -0,32 | 0,505971523 | 0,11  | 0,882385071 | 0,55  | 0,134275521 | -0,1  | 0,890833196 |

|          |       |             |       |             |       |             |       |             |       |             |
|----------|-------|-------------|-------|-------------|-------|-------------|-------|-------------|-------|-------------|
| Aarsd1   | -0,36 | 0,391793671 | -0,64 | 0,508633526 | 0,46  | 0,570360359 | 0,36  | 0,34029034  | -0,17 | 0,799584228 |
| Aasdh    | -0,05 | 0,964124037 | -0,05 | 0,95775423  | 0,05  | 0,969269701 | -0,41 | 0,387328067 | -0,2  | 0,755982506 |
| Aasdhppt | -0,11 | 0,915803561 | -0,21 | 0,831404974 | 0,58  | 0,570743031 | 0,34  | 0,604842873 | 0,44  | 0,592505698 |
| Aass     | 0,15  | 0,818587047 | -0,97 | 0,31758873  | -0,11 | 0,904132011 | -0,3  | 0,690442683 | 0,18  | 0,844455252 |
| Aatf     | -0,42 | 0,608455671 | 0,06  | 0,959209847 | -0,08 | 0,921956183 | 0,16  | 0,753242411 | 0,14  | 0,84597948  |
| Aatk     | -0,13 | 0,863205581 | -0,06 | 0,945374636 | 0,04  | 0,958885013 | -0,44 | 0,443508321 | -0,62 | 0,26930748  |
| AB010352 | -0,5  | 0,419591944 | 0,69  | 0,775483469 | -0,41 | 0,809137779 | -1,67 | 0,382952883 | -0,03 | 0,991977803 |
| AB041806 | 0,11  | 0,891955146 | -0,09 | 0,903595287 | 0,08  | 0,949553487 | 0,18  | 0,805169421 | -0,07 | 0,949295857 |
| AB124611 | -0,07 | 0,937444361 | 0,22  | 0,747707816 | -0,05 | 0,976741515 | -0,18 | 0,814701375 | -0,3  | 0,705047619 |
| Abat     | -0,3  | 0,687662951 | 0,3   | 0,823434568 | -0,63 | 0,435266489 | -1,18 | 0,224359102 | 0,21  | 0,860591136 |
| Abca1    | -0,1  | 0,870052902 | -0,12 | 0,873628464 | -0,01 | 0,993379272 | 1,32  | 0,073347505 | -0,71 | 0,281633932 |
| Abca12   | -0,2  | 0,79795086  | -0,21 | 0,792234642 | 0,1   | 0,87734396  | 0,22  | 0,787959914 | -0,09 | 0,942187522 |
| Abca13   | 0,09  | 0,892823025 | 0,12  | 0,898952381 | -0,13 | 0,847178115 | -0,44 | 0,31391139  | -0,12 | 0,91314596  |
| Abca14   | 0,33  | 0,692923111 | -0,03 | 0,989205598 | -0,52 | 0,300988698 | -0,34 | 0,596621995 | 0,31  | 0,598277181 |
| Abca15   | -0,04 | 0,975506993 | 0     | 1           | 0,01  | 0,995669314 | -0,28 | 0,541253959 | -0,09 | 0,955924863 |
| Abca16   | 0,28  | 0,59648949  | 0,18  | 0,837500541 | 0,08  | 0,901032944 | 0,16  | 0,646645335 | 0,27  | 0,602231893 |
| Abca17   | -0,22 | 0,78476082  | -0,18 | 0,698459103 | -0,02 | 0,990836784 | 0,63  | 0,290272891 | 0,1   | 0,934185668 |
| Abca2    | -0,26 | 0,584577768 | -0,36 | 0,530808197 | 0,53  | 0,458880539 | -0,96 | 0,035685356 | -0,92 | 0,043727018 |
| Abca3    | -0,45 | 0,351518071 | -0,02 | 0,979551751 | -0,31 | 0,713620433 | 0,73  | 0,068554942 | -0,26 | 0,673577848 |
| Abca4    | -0,76 | 0,357059906 | -0,61 | 0,302845725 | 0,3   | 0,746397133 | 1,58  | 0,030256257 | -0,22 | 0,779699075 |
| Abca5    | 0,52  | 0,471980619 | -0,26 | 0,638366221 | 0,9   | 0,211244596 | 1,03  | 0,217079936 | 0,01  | 0,992370267 |
| Abca6    | -0,48 | 0,273563517 | 0,33  | 0,533646692 | 0,19  | 0,783643428 | -0,2  | 0,709632549 | 0,02  | 0,990839896 |
| Abca7    | -0,46 | 0,444003532 | -0,48 | 0,314703215 | 0,38  | 0,662451176 | -1,04 | 0,021262879 | -0,1  | 0,883592868 |
| Abca8a   | -0,11 | 0,870865472 | 0,11  | 0,906777728 | -0,52 | 0,361580981 | -0,21 | 0,793863317 | -0,23 | 0,826379382 |
| Abca8b   | -0,16 | 0,746052863 | 0,2   | 0,89081665  | -0,47 | 0,541296354 | -0,9  | 0,265477862 | -0,98 | 0,188623626 |
| Abca9    | 0,59  | 0,189280964 | 0,01  | 0,994447711 | -0,06 | 0,952424681 | 0,05  | 0,92289757  | 0,03  | 0,976743304 |
| Abcb10   | -0,26 | 0,757032046 | -0,43 | 0,574785371 | 0,23  | 0,886994263 | 0,27  | 0,709815402 | 0,29  | 0,678938588 |
| Abcb11   | 0,27  | 0,822511836 | 0,06  | 0,965039248 | -0,1  | 0,888921789 | -0,32 | 0,661662084 | -0,3  | 0,730289864 |
| Abcb1a   | -0,74 | 0,433848441 | -0,98 | 0,318261487 | 0,49  | 0,696484631 | 1,49  | 0,01121436  | -0,63 | 0,456564217 |
| Abcb1b   | 0,12  | 0,91917614  | 0,33  | 0,78645186  | 0,47  | 0,770634498 | 0,14  | 0,907406741 | 0,05  | 0,976393169 |
| Abcb4    | -0,6  | 0,319596051 | -0,53 | 0,280972546 | 0,08  | 0,910151906 | 0,68  | 0,078997606 | 0,51  | 0,250313297 |
| Abcb5    | 0,4   | 0,374675659 | 0,28  | 0,714037771 | 0,38  | 0,445255789 | -0,08 | 0,909976349 | 0,27  | 0,763240477 |
| Abcb6    | -0,38 | 0,690928973 | -1,02 | 0,257624607 | 0,88  | 0,138993675 | 0,56  | 0,400087173 | -0,29 | 0,84352881  |
| Abcb7    | -0,64 | 0,508688727 | -0,58 | 0,214321569 | 0,84  | 0,490720691 | 0,94  | 0,313701653 | 0,27  | 0,920355527 |
| Abcb8    | -0,59 | 0,202030668 | -0,35 | 0,649542145 | 0,13  | 0,837156771 | 0,16  | 0,845813504 | -0,1  | 0,918865935 |



|          |       |             |       |             |       |             |       |             |       |             |
|----------|-------|-------------|-------|-------------|-------|-------------|-------|-------------|-------|-------------|
| Abcb9    | 0,11  | 0,910211895 | -0,31 | 0,600116417 | 0,02  | 0,988661889 | -0,86 | 0,098577249 | -0,22 | 0,780016298 |
| Abcc1    | 0,02  | 0,982432452 | -0,24 | 0,771847912 | 0,68  | 0,460039867 | 0,28  | 0,603286711 | -0,36 | 0,540143194 |
| Abcc10   | -0,27 | 0,786709661 | -0,09 | 0,938233008 | -0,06 | 0,940550094 | -0,31 | 0,477330342 | 0,14  | 0,890957032 |
| Abcc12   | 0,11  | 0,895278749 | 0,16  | 0,849473761 | -0,31 | 0,66225859  | -0,16 | 0,714767529 | -0,31 | 0,674381312 |
| Abcc2    | 0,49  | 0,306829062 | -0,08 | 0,943915456 | 0,07  | 0,946810097 | -0,1  | 0,915403777 | 0,77  | 0,456658287 |
| Abcc3    | -0,96 | 0,233235566 | -0,23 | 0,630975718 | 0,12  | 0,919165023 | 0,38  | 0,637125181 | -1,06 | 0,325920244 |
| Abcc4    | -0,15 | 0,823402057 | -0,03 | 0,975959817 | 0,09  | 0,937566473 | -0,33 | 0,420869535 | 0,24  | 0,671441327 |
| Abcc5    | -0,36 | 0,593540946 | 0,08  | 0,901000778 | 0,12  | 0,921956183 | -0,76 | 0,11422533  | -0,37 | 0,47741376  |
| Abcc6    | -0,21 | 0,617280733 | 0,02  | 0,980349721 | -0,22 | 0,791083767 | 0,09  | 0,92123654  | 0,02  | 0,985269236 |
| Abcc8    | -0,13 | 0,903817676 | -0,46 | 0,438974253 | 0,06  | 0,955257293 | 0,51  | 0,320390847 | -0,26 | 0,788295661 |
| Abcc9    | -0,64 | 0,410757607 | -0,89 | 0,279092572 | 1,71  | 0,035830876 | 3,47  | 0,002324024 | -1,03 | 0,032750472 |
| Abcd1    | -0,1  | 0,865689677 | 0,13  | 0,842793123 | -0,3  | 0,792556971 | -0,48 | 0,428412395 | -0,16 | 0,844157219 |
| Abcd2    | -0,33 | 0,600120467 | 0,12  | 0,919873208 | 0,23  | 0,811418904 | -0,97 | 0,444137162 | -0,65 | 0,608072805 |
| Abcd3    | -0,72 | 0,490893229 | -0,44 | 0,491696913 | 0,64  | 0,366234911 | 0,87  | 0,420561017 | -0,14 | 0,951544448 |
| Abcd4    | -0,4  | 0,379326218 | -0,05 | 0,954308643 | -0,23 | 0,653810439 | -0,07 | 0,898801714 | -0,24 | 0,662029815 |
| Abce1    | -0,21 | 0,730710327 | -0,1  | 0,882847123 | 0,27  | 0,591404136 | 0,61  | 0,130495864 | 0,1   | 0,896985943 |
| Abcf1    | -0,36 | 0,371554727 | -0,03 | 0,9714703   | 0,08  | 0,909963525 | 0,51  | 0,285462518 | -0,13 | 0,890947281 |
| Abcf2    | -0,54 | 0,181672845 | -0,82 | 0,17827498  | 0,39  | 0,638689491 | 0,9   | 0,035664228 | 0,13  | 0,864004866 |
| Abcf3    | -0,31 | 0,63699384  | 0,21  | 0,649542145 | -0,43 | 0,440449142 | -0,11 | 0,885417869 | 0,07  | 0,962408022 |
| Abcg1    | -0,46 | 0,392900129 | -0,82 | 0,466954112 | 0,53  | 0,237889028 | 0,96  | 0,190150791 | -0,12 | 0,927536545 |
| Abcg2    | -1,25 | 0,106547713 | -1,02 | 0,203805905 | 1,34  | 0,218776606 | -1,23 | 0,016138119 | -0,58 | 0,269636334 |
| Abcg3    | -0,37 | 0,537345693 | -0,14 | 0,812432185 | -0,35 | 0,456595062 | -0,52 | 0,392579767 | 0,48  | 0,51715199  |
| Abcg4    | 0,16  | 0,839871081 | 0,18  | 0,893804228 | 0,44  | 0,697734862 | 0,19  | 0,836619631 | -0,11 | 0,940438527 |
| Abcg5    | 0,2   | 0,761457464 | -0,1  | 0,861828582 | -0,21 | 0,755042381 | 0     | 1           | 0,26  | 0,627047332 |
| Abcg8    | 0     | 1           | -0,42 | 0,58591598  | -0,55 | 0,418282008 | 0,15  | 0,855813607 | 0,31  | 0,708898543 |
| Abhd1    | 0,13  | 0,932324918 | -0,32 | 0,782652703 | 0,02  | 0,989506262 | -0,64 | 0,515788764 | -0,21 | 0,844455252 |
| Abhd10   | -0,05 | 0,973255755 | -0,19 | 0,637224838 | 1,06  | 0,358191681 | -0,01 | 0,997129538 | 0,74  | 0,25854927  |
| Abhd11   | -0,08 | 0,914090929 | 0,49  | 0,310802741 | -0,45 | 0,588145967 | -0,33 | 0,564693464 | 0,21  | 0,804576732 |
| Abhd11os | -0,02 | 0,981400637 | -0,38 | 0,367816638 | -0,39 | 0,605402838 | 0,16  | 0,682573611 | -0,14 | 0,822709063 |
| Abhd12   | -0,28 | 0,744352714 | -0,31 | 0,69170392  | 0,26  | 0,830541787 | 0,01  | 0,980883383 | -0,46 | 0,316401979 |
| Abhd12b  | 0,02  | 0,989784447 | -0,32 | 0,637452806 | -0,08 | 0,922318683 | 0,47  | 0,434295291 | 0,05  | 0,969617491 |
| Abhd13   | -0,59 | 0,30122822  | 0,35  | 0,519915586 | -0,6  | 0,468007943 | -0,25 | 0,515329684 | 0,11  | 0,872943048 |
| Abhd14a  | -0,6  | 0,595594347 | -0,61 | 0,457889449 | -0,13 | 0,917694073 | 1,04  | 0,291342407 | -0,32 | 0,858526809 |
| Abhd14b  | -0,01 | 0,993175772 | 0,04  | 0,969314504 | -0,42 | 0,534288874 | -0,73 | 0,102906058 | -0,08 | 0,954106364 |
| Abhd15   | 0,08  | 0,925510521 | -0,3  | 0,679872735 | -0,04 | 0,965775869 | 0,34  | 0,387666712 | 0,18  | 0,844079844 |

|         |       |             |       |             |       |             |       |             |       |             |
|---------|-------|-------------|-------|-------------|-------|-------------|-------|-------------|-------|-------------|
| Abhd16a | 0,68  | 0,206075224 | 0,41  | 0,599008089 | -0,78 | 0,224747376 | -0,23 | 0,592313668 | 0,92  | 0,047245067 |
| Abhd16b | -0,07 | 0,944722622 | -0,23 | 0,666450149 | 0,06  | 0,956570063 | 0,35  | 0,661977311 | -0,01 | 0,991628025 |
| Abhd17a | -0,25 | 0,670509411 | -0,69 | 0,29534854  | 1,65  | 0,012126285 | 0,64  | 0,358502795 | -0,52 | 0,490247948 |
| Abhd17b | 0,03  | 0,97382475  | 0,76  | 0,267378853 | 0,66  | 0,701374092 | 0,74  | 0,149073408 | 0,65  | 0,48418382  |
| Abhd17c | -0,22 | 0,648730873 | -0,59 | 0,270746473 | -0,1  | 0,941063967 | 1,72  | 0,142413174 | 0,5   | 0,712786855 |
| Abhd18  | -0,01 | 0,995482647 | 1,02  | 0,467853942 | 0,58  | 0,727262258 | -0,34 | 0,620676152 | -0,02 | 0,989300476 |
| Abhd2   | -0,29 | 0,611339325 | -0,24 | 0,753256548 | 0,4   | 0,526901752 | 0,39  | 0,633102107 | 0,19  | 0,859686493 |
| Abhd3   | 0,59  | 0,214430522 | 0     | 1           | -0,32 | 0,636722883 | -0,79 | 0,133183454 | 0,02  | 0,985577364 |
| Abhd4   | -0,45 | 0,338168327 | -0,35 | 0,43310124  | -0,26 | 0,777417583 | 0,43  | 0,390424873 | -0,59 | 0,327302459 |
| Abhd5   | -0,29 | 0,511327214 | -0,16 | 0,784664932 | 0,21  | 0,697776023 | 0,1   | 0,83477205  | 0,13  | 0,879517285 |
| Abhd6   | 0,15  | 0,831697563 | 0,28  | 0,488525923 | 0,8   | 0,695306228 | -0,15 | 0,679886975 | 0,74  | 0,084101113 |
| Abhd8   | -0,42 | 0,608067727 | -0,78 | 0,228728406 | -0,32 | 0,695765206 | 0,46  | 0,523255995 | -0,55 | 0,4940585   |
| Abi1    | 0,17  | 0,697992827 | 0,23  | 0,57304063  | 0,28  | 0,583808777 | 0,28  | 0,378311377 | 0,24  | 0,640223591 |
| Abi2    | -0,96 | 0,14232546  | -0,09 | 0,938711163 | 0,51  | 0,271623872 | -0,61 | 0,123015352 | -0,72 | 0,220649277 |
| Abi3    | -0,11 | 0,856118781 | 0,03  | 0,965147491 | -0,59 | 0,183788478 | -0,69 | 0,323318359 | -0,46 | 0,587915673 |
| Abi3bp  | -0,09 | 0,944291635 | 0,42  | 0,785153081 | -1,34 | 0,083068472 | -2,03 | 0,057215016 | -0,24 | 0,836061657 |
| Abi1    | -0,35 | 0,488619512 | -0,37 | 0,561842393 | 0,15  | 0,87140695  | -0,06 | 0,955808624 | -0,5  | 0,572917283 |
| Abi2    | 0,38  | 0,350577556 | 0,26  | 0,750160982 | -0,53 | 0,300310474 | 0,99  | 0,060994198 | 1,09  | 0,036867459 |
| Ablim1  | -0,1  | 0,898269435 | 0,35  | 0,56444197  | -0,17 | 0,905209657 | 0,65  | 0,202270341 | -0,5  | 0,414033358 |
| Ablim2  | 0,45  | 0,441176207 | 0,09  | 0,935329426 | -0,17 | 0,809062815 | -1,03 | 0,142537954 | 0,03  | 0,979456872 |
| Ablim3  | -1,31 | 0,159480198 | -1,11 | 0,224596043 | -0,11 | 0,948637233 | 1,2   | 0,085320087 | -1,32 | 0,039082761 |
| Abo     | 0,12  | 0,898912077 | -0,02 | 0,98859071  | -0,07 | 0,946810097 | 0,6   | 0,098547104 | 0,04  | 0,971911885 |
| Abr     | -0,35 | 0,397054492 | -0,2  | 0,730794426 | 0,32  | 0,548288344 | -2,24 | 0,007440514 | -0,9  | 0,113514806 |
| Abra    | -0,11 | 0,89081819  | -0,12 | 0,838368852 | 0,06  | 0,94940954  | 0,13  | 0,821094483 | 0,49  | 0,46173543  |
| Abracl  | -0,37 | 0,413477239 | -0,24 | 0,693906911 | 0,72  | 0,124912754 | 1,48  | 0,018041423 | 0,23  | 0,732849974 |
| Abt1    | -0,24 | 0,727334514 | -0,2  | 0,654719935 | 0,65  | 0,105164466 | 0,31  | 0,780418936 | -0,1  | 0,947559952 |
| Abtb1   | -0,74 | 0,391246185 | -0,48 | 0,747707816 | -0,34 | 0,812319246 | 0,78  | 0,53378351  | 0,32  | 0,78931193  |
| Abtb2   | 0,88  | 0,228694841 | 1,4   | 0,213731156 | 0,52  | 0,773365699 | 1,1   | 0,151857581 | 1     | 0,05100134  |
| Acaa1a  | 0,07  | 0,915575695 | 0,32  | 0,484308011 | -0,05 | 0,933664248 | -0,79 | 0,059484256 | 0,31  | 0,684349871 |
| Acaa1b  | 0,17  | 0,738714467 | 0,46  | 0,415359425 | -0,08 | 0,924836701 | -0,65 | 0,164154995 | 0,19  | 0,825966687 |
| Acaa2   | -0,57 | 0,222262142 | -0,2  | 0,831928565 | 0,73  | 0,327976309 | -1,28 | 0,116198977 | -0,8  | 0,266832581 |
| Acaca   | -0,67 | 0,439008948 | -0,61 | 0,36062169  | 0,55  | 0,503030845 | -0,84 | 0,102737589 | -0,67 | 0,33753085  |
| Acacb   | -0,23 | 0,628474488 | 0,21  | 0,615311543 | -0,32 | 0,783052291 | -1,6  | 0,039721616 | -0,91 | 0,200801504 |
| Acad10  | 0,07  | 0,956705598 | -0,12 | 0,821664771 | -0,24 | 0,85092959  | -0,35 | 0,453228367 | 0,12  | 0,950308536 |
| Acad11  | 0,14  | 0,887147128 | 0,06  | 0,972706967 | 0,29  | 0,821229302 | -0,1  | 0,942235848 | -0,26 | 0,835191    |

|        |       |             |       |             |       |             |       |             |       |             |
|--------|-------|-------------|-------|-------------|-------|-------------|-------|-------------|-------|-------------|
| Acad8  | 0,02  | 0,989017567 | 0,24  | 0,854940418 | 0,67  | 0,541560473 | -0,45 | 0,509615221 | -0,03 | 0,978330214 |
| Acad9  | -0,23 | 0,872034336 | -0,59 | 0,302028989 | 0,52  | 0,650894386 | 0,58  | 0,41855272  | -0,58 | 0,576337996 |
| Acadl  | 0,15  | 0,764288636 | 0,2   | 0,680709276 | -0,26 | 0,830514771 | 0,31  | 0,428855564 | 0,71  | 0,122233155 |
| Acadm  | -0,49 | 0,622436248 | -0,26 | 0,729741948 | 0,83  | 0,528035003 | -0,02 | 0,988216128 | -0,27 | 0,84701421  |
| Acads  | -0,61 | 0,353539338 | -0,34 | 0,555906531 | -0,38 | 0,675548701 | 0,77  | 0,043065797 | -0,52 | 0,327053938 |
| Acadsb | -0,1  | 0,846313357 | -0,1  | 0,922123472 | 0,21  | 0,789802954 | -0,01 | 0,997771107 | 0,02  | 0,991977803 |
| Acadvl | -0,16 | 0,7494877   | 0,38  | 0,582478031 | -0,11 | 0,903366838 | -0,42 | 0,244334606 | 0,17  | 0,796146369 |
| Acan   | -0,33 | 0,715591802 | -0,04 | 0,937432848 | 0,05  | 0,960677449 | -0,07 | 0,873610553 | 0,11  | 0,890957032 |
| Acap1  | -0,04 | 0,970463755 | -0,05 | 0,975959817 | 0,11  | 0,940310753 | 1,13  | 0,28265533  | 0,01  | 0,997240132 |
| Acap2  | -0,31 | 0,640002115 | 0,2   | 0,794404033 | 0,24  | 0,752157341 | -0,72 | 0,231238597 | -0,14 | 0,910829332 |
| Acap3  | -0,76 | 0,153824107 | -0,78 | 0,148275042 | 0,65  | 0,209863447 | -0,53 | 0,148049519 | -0,28 | 0,619978756 |
| Acat1  | -0,35 | 0,516626659 | -0,55 | 0,538642201 | 0,71  | 0,475398917 | 0,37  | 0,541830172 | 0,07  | 0,95587699  |
| Acat2  | 0,15  | 0,871927625 | 0,47  | 0,444234915 | 0,01  | 0,994700527 | -0,06 | 0,915888138 | 0,15  | 0,905842374 |
| Acat3  | 0,49  | 0,685826767 | -0,34 | 0,906758475 | 0,63  | 0,570743031 | 1,25  | 0,522894482 | -0,12 | 0,956610289 |
| Acbd3  | -0,05 | 0,91774858  | -0,1  | 0,834788124 | -0,1  | 0,878636183 | 0,78  | 0,049706483 | 0,38  | 0,426549004 |
| Acbd4  | -0,14 | 0,775384541 | 0,14  | 0,821056656 | -0,59 | 0,225213429 | -0,26 | 0,459625812 | -0,17 | 0,790424343 |
| Acbd5  | -0,53 | 0,261843547 | -0,15 | 0,811472247 | -0,09 | 0,919754592 | -0,2  | 0,555564163 | -0,26 | 0,736872759 |
| Acbd6  | -0,15 | 0,846313357 | -0,18 | 0,801609076 | 0,12  | 0,950725218 | 0,37  | 0,501757134 | -0,11 | 0,901341817 |
| Acbd7  | -0,11 | 0,899079341 | 0,05  | 0,949299949 | 0,1   | 0,945886808 | -0,31 | 0,585853386 | -0,34 | 0,629683647 |
| Accs   | -0,26 | 0,720829271 | -0,17 | 0,873601941 | 0,38  | 0,671215692 | -0,76 | 0,132562498 | -0,74 | 0,131273838 |
| Accsl  | -0,24 | 0,808947569 | -0,27 | 0,649611595 | -0,32 | 0,678468552 | 0,03  | 0,967463999 | 0,08  | 0,947254077 |
| Acd    | -0,24 | 0,708991824 | 0,14  | 0,85597055  | 0,24  | 0,727119276 | -0,2  | 0,793099857 | 0,24  | 0,802027955 |
| Ace    | -1,31 | 0,110252498 | -0,52 | 0,406817158 | 0,15  | 0,914301036 | 0,91  | 0,073982423 | -1,31 | 0,060986193 |
| Ace2   | 0,1   | 0,892823025 | -0,13 | 0,828034932 | 0,03  | 0,969476711 | -0,05 | 0,914828446 | -0,19 | 0,789985499 |
| Acer1  | 0,37  | 0,471980619 | 0,29  | 0,765180904 | -0,68 | 0,370554673 | -0,35 | 0,730493593 | 0,34  | 0,747614877 |
| Acer2  | 0,02  | 0,986940612 | 0,43  | 0,601390176 | -0,26 | 0,850015443 | -2,51 | 0,004990007 | -0,33 | 0,524829864 |
| Acer3  | -0,15 | 0,847070804 | 0     | 1           | 0,34  | 0,772782651 | 2,41  | 0,008674249 | 0,41  | 0,471979791 |
| Ache   | -0,06 | 0,959985598 | -0,21 | 0,680709276 | 0,06  | 0,946627221 | -0,83 | 0,124923887 | -0,8  | 0,318985547 |
| Acin1  | -0,01 | 0,993175772 | 0,2   | 0,635735492 | -0,22 | 0,783006    | 0,07  | 0,870043183 | 0,2   | 0,747614877 |
| Ackr1  | -0,58 | 0,731184324 | -0,4  | 0,529278426 | 0,28  | 0,878636183 | 1,88  | 0,119211211 | -0,14 | 0,953989345 |
| Ackr2  | 1,44  | 0,098762365 | 0,54  | 0,643631572 | -0,54 | 0,57717258  | -0,4  | 0,74633873  | 1,79  | 0,044184099 |
| Ackr3  | -0,04 | 0,964951393 | -0,4  | 0,547180632 | -0,38 | 0,733092626 | 0,92  | 0,08184053  | -0,3  | 0,723883531 |
| Ackr4  | -0,04 | 0,972667767 | 0,11  | 0,869488567 | 0,07  | 0,940489823 | -0,22 | 0,721363271 | -0,31 | 0,631872562 |
| Acly   | -0,49 | 0,241021853 | -0,17 | 0,716668427 | 0,21  | 0,742758388 | -0,07 | 0,8914104   | -0,67 | 0,356187156 |
| Acmsd  | 0,16  | 0,843029805 | 0,3   | 0,826349245 | 0,24  | 0,700061351 | -0,02 | 0,978341553 | -0,09 | 0,936278784 |

|        |       |             |       |             |       |             |       |             |       |             |
|--------|-------|-------------|-------|-------------|-------|-------------|-------|-------------|-------|-------------|
| Acnat2 | 0,4   | 0,506476054 | 0,12  | 0,919169439 | -0,41 | 0,319105917 | -0,24 | 0,567510982 | 0,32  | 0,77143728  |
| Aco1   | -0,24 | 0,66609472  | -0,18 | 0,693906911 | 0,93  | 0,490489841 | 0,16  | 0,653801322 | -0,88 | 0,047245067 |
| Aco2   | -0,37 | 0,353022744 | -0,33 | 0,534340854 | 0,31  | 0,589451508 | 0,3   | 0,511493252 | -0,26 | 0,683306186 |
| Acot1  | 0,39  | 0,703606438 | -0,09 | 0,910688765 | -0,52 | 0,219362501 | -1,09 | 0,111785406 | 0,49  | 0,654732327 |
| Acot10 | 0,3   | 0,47665759  | 0,05  | 0,919762719 | -0,14 | 0,923258105 | 0,32  | 0,455936565 | 0,33  | 0,541316402 |
| Acot11 | -0,22 | 0,602160482 | -0,27 | 0,714081487 | 0,23  | 0,647047222 | -0,37 | 0,272762279 | -0,26 | 0,699996356 |
| Acot12 | 0,12  | 0,785491059 | 0,08  | 0,887889466 | -0,39 | 0,443039118 | -0,38 | 0,460281746 | -0,07 | 0,966027625 |
| Acot13 | 0,04  | 0,951126982 | -0,06 | 0,970020205 | 0,16  | 0,922318683 | 0,3   | 0,785027978 | 0     | 0,999775166 |
| Acot2  | 0,16  | 0,777335496 | -0,26 | 0,651587568 | -0,33 | 0,688643408 | -0,04 | 0,9704566   | 0,53  | 0,456564217 |
| Acot3  | -0,05 | 0,962492281 | 0,08  | 0,868538818 | -0,02 | 0,978012085 | 0,3   | 0,600519686 | 0,1   | 0,92519473  |
| Acot4  | 0,31  | 0,539754131 | 0,07  | 0,956555856 | -0,1  | 0,915136374 | -0,28 | 0,490205919 | 0,56  | 0,548871936 |
| Acot5  | 0,29  | 0,486906643 | -0,25 | 0,732044571 | -0,1  | 0,885777396 | 0,18  | 0,776545078 | -0,13 | 0,86809582  |
| Acot6  | 0,09  | 0,867953985 | -0,13 | 0,850001559 | 0,17  | 0,884898822 | -0,9  | 0,207023714 | -1,19 | 0,137167994 |
| Acot7  | -0,26 | 0,588986046 | -0,73 | 0,156759607 | 0,62  | 0,424172432 | 2,65  | 0,004331967 | -0,44 | 0,404727018 |
| Acot8  | -0,01 | 0,994072289 | -0,26 | 0,606538925 | -0,04 | 0,960485809 | -0,2  | 0,715220925 | -0,15 | 0,833124162 |
| Acox1  | -0,8  | 0,242987368 | -0,36 | 0,724196236 | -0,15 | 0,79678698  | -0,37 | 0,667849424 | -0,23 | 0,794253181 |
| Acox2  | -0,05 | 0,941126856 | -0,09 | 0,880259895 | 0,57  | 0,401621802 | -0,23 | 0,744531065 | 0,06  | 0,95985938  |
| Acox3  | -0,39 | 0,358823255 | -0,09 | 0,897574732 | 0,32  | 0,66160962  | -0,35 | 0,43471443  | -1,07 | 0,055051035 |
| Acox1  | 0,09  | 0,892823025 | 0     | 1           | -0,25 | 0,568619313 | 0,32  | 0,284243483 | 0,05  | 0,954321967 |
| Acp1   | -0,26 | 0,496018519 | -1    | 0,316289337 | 0,32  | 0,69636251  | 1,01  | 0,084269547 | 0,09  | 0,939930189 |
| Acp2   | -0,02 | 0,989374982 | 0     | 1           | 0,26  | 0,572115538 | 0     | 1           | -0,55 | 0,499998316 |
| Acp5   | 0,38  | 0,434641897 | -0,88 | 0,373487552 | 0,05  | 0,963199274 | 1,05  | 0,140538478 | -0,2  | 0,797293554 |
| Acp6   | -0,07 | 0,903817676 | -0,51 | 0,270911305 | 0,14  | 0,822554757 | 0,29  | 0,421861887 | -0,06 | 0,951544448 |
| Acp7   | 0,06  | 0,948926586 | 0,11  | 0,869444586 | -0,21 | 0,660920525 | 0,13  | 0,716941679 | 0,07  | 0,939448119 |
| Acpp   | -1,4  | 0,023653665 | -1,2  | 0,518494408 | 0,98  | 0,057900017 | 2,3   | 0,023267289 | 0,12  | 0,878966527 |
| Acpt   | 0,38  | 0,413984382 | 0,33  | 0,765370871 | -0,09 | 0,935854369 | -0,08 | 0,907108675 | 0,24  | 0,786745037 |
| Acr    | 0,37  | 0,449899679 | 0,16  | 0,891532732 | -0,6  | 0,645159648 | -0,54 | 0,407916841 | 0,34  | 0,695024336 |
| Acrbp  | 0,45  | 0,620468351 | 0,16  | 0,815791007 | -0,46 | 0,593455611 | -0,6  | 0,234473469 | 0,16  | 0,884640084 |
| Acrv1  | 0,17  | 0,703606438 | 0,06  | 0,951163365 | -0,16 | 0,863964732 | 0,27  | 0,534841007 | 0,08  | 0,940092696 |
| Acsbg1 | -0,38 | 0,353845099 | 0,06  | 0,927424229 | 1,67  | 0,076696168 | 0,26  | 0,545177609 | 0,31  | 0,649846438 |
| Acsbg2 | 0,31  | 0,491833357 | 0,12  | 0,940046211 | 0,03  | 0,973186233 | -0,06 | 0,916687126 | -0,22 | 0,794006294 |
| Acsf2  | -0,74 | 0,374743123 | -0,75 | 0,231499374 | 0,59  | 0,11553742  | -0,09 | 0,93510539  | -0,35 | 0,757342197 |
| Acsf3  | -0,19 | 0,821541936 | 0,02  | 0,988550087 | 0,11  | 0,921289719 | 0,11  | 0,887001654 | -0,38 | 0,635102193 |
| Acsl1  | -0,34 | 0,768809729 | 0,81  | 0,250942254 | 0,18  | 0,908400411 | -0,11 | 0,943565161 | -0,51 | 0,6754671   |
| Acsl3  | -0,74 | 0,316599006 | -0,21 | 0,854999866 | 1,14  | 0,369024533 | 0,22  | 0,763593883 | 0,39  | 0,633084591 |

|         |       |             |       |             |       |             |       |             |       |             |
|---------|-------|-------------|-------|-------------|-------|-------------|-------|-------------|-------|-------------|
| Acsl4   | 0,32  | 0,444864485 | 0,44  | 0,353346153 | -0,15 | 0,841669036 | 1,26  | 0,094014104 | 0,21  | 0,830813323 |
| Acsl5   | -0,18 | 0,743090353 | -0,17 | 0,693906911 | -0,23 | 0,67264966  | 0,66  | 0,18825829  | 0,4   | 0,530072156 |
| Acsl6   | 0,45  | 0,575887113 | 0,26  | 0,509013394 | -0,57 | 0,201434717 | 0,68  | 0,171625869 | 0,65  | 0,241922199 |
| Acsm1   | -0,08 | 0,928944712 | -0,04 | 0,958545812 | 0,13  | 0,898935616 | 0,13  | 0,800853287 | 0,35  | 0,63990854  |
| Acsm2   | -0,21 | 0,713441163 | -0,4  | 0,314646132 | -0,08 | 0,933732147 | -0,1  | 0,855784146 | -0,21 | 0,811290509 |
| Acsm3   | 0,08  | 0,928499167 | 0,38  | 0,530207532 | -0,43 | 0,361346847 | -0,24 | 0,694368504 | -0,18 | 0,848899219 |
| Acsm4   | 0,06  | 0,942331022 | 0,08  | 0,95021587  | -0,26 | 0,716019776 | -0,2  | 0,689043845 | -0,4  | 0,499998316 |
| Acsm5   | -0,01 | 0,992748202 | 0,06  | 0,968620079 | -0,14 | 0,809137779 | 0,2   | 0,804185549 | 0,11  | 0,910083563 |
| Acss1   | -0,17 | 0,83300368  | 0,51  | 0,638366221 | -0,32 | 0,541560473 | -1,76 | 0,013836074 | -0,06 | 0,964621851 |
| Acss2   | -0,58 | 0,448008565 | 0,14  | 0,922399849 | -0,51 | 0,465949919 | -1,09 | 0,189130106 | -0,58 | 0,590396118 |
| Acss2os | 0,47  | 0,276037739 | 0,19  | 0,703291096 | 0,34  | 0,558908463 | -0,33 | 0,545177609 | -0,43 | 0,445533492 |
| Acss3   | -0,18 | 0,719765184 | 0,05  | 0,958856577 | -0,14 | 0,83053335  | -0,19 | 0,800853287 | -0,26 | 0,763130301 |
| Acta1   | -0,02 | 0,978126898 | 0,11  | 0,88899358  | 0,04  | 0,967930981 | 0,16  | 0,718932219 | 0,05  | 0,953297732 |
| Acta2   | -0,23 | 0,850491134 | -0,16 | 0,764886087 | -0,01 | 0,997268369 | -0,5  | 0,442630753 | -0,39 | 0,605912145 |
| Actbl2  | 0,05  | 0,96781605  | -0,24 | 0,778494423 | 0,43  | 0,526512749 | 0,36  | 0,644043374 | -0,17 | 0,860292816 |
| Actc1   | -0,09 | 0,9231839   | 0,04  | 0,957957101 | -0,11 | 0,904057901 | -0,24 | 0,62296101  | 0,32  | 0,59705803  |
| Actg1   | -0,23 | 0,526856715 | 0,09  | 0,834031961 | 0,15  | 0,778116825 | 0,5   | 0,169538994 | 0,04  | 0,966157079 |
| Actg2   | -0,21 | 0,794063226 | -0,32 | 0,501917143 | 0,06  | 0,959201928 | 0,26  | 0,583447596 | -0,06 | 0,951429597 |
| Actl10  | 0,28  | 0,72989626  | 0,03  | 0,97872179  | 0     | 0,99989524  | 0,05  | 0,976115775 | -0,33 | 0,819072786 |
| Actl11  | 0,1   | 0,862322913 | 0,06  | 0,950576066 | -0,11 | 0,856246709 | -0,12 | 0,801091541 | 0,06  | 0,932846086 |
| Actl6a  | -0,34 | 0,545635346 | -0,43 | 0,436759792 | 0,56  | 0,453275578 | 1,01  | 0,175089773 | -0,28 | 0,774826589 |
| Actl6b  | 0,08  | 0,928396151 | 0,03  | 0,972706967 | -0,43 | 0,36356264  | 0,17  | 0,703341582 | 0,22  | 0,765342998 |
| Actl7a  | -0,37 | 0,488512756 | 0,06  | 0,945143056 | -0,45 | 0,428128781 | 0,29  | 0,511016709 | 0,01  | 0,993293923 |
| Actl7b  | 0,25  | 0,610509826 | -0,57 | 0,609977513 | -0,33 | 0,683975246 | 0,11  | 0,947551542 | -0,19 | 0,889106241 |
| Actl9   | 0,22  | 0,805638542 | -0,61 | 0,418712141 | 0,37  | 0,402409115 | 0     | 0,993869623 | 0,1   | 0,911850421 |
| Actn1   | -0,27 | 0,595245851 | -0,14 | 0,749674871 | 0,09  | 0,914522109 | 2,34  | 0,005176161 | 0,6   | 0,281761956 |
| Actn2   | -0,35 | 0,641357042 | 0,26  | 0,748874675 | -0,52 | 0,374422909 | -0,05 | 0,972244785 | 0,38  | 0,716229308 |
| Actn3   | 0,04  | 0,957820843 | -0,19 | 0,754479452 | 0,18  | 0,724360024 | 0,29  | 0,661916932 | -0,27 | 0,720440621 |
| Actn4   | -0,64 | 0,177431156 | -0,39 | 0,317755212 | 0,36  | 0,473499244 | 0,08  | 0,82581314  | -0,46 | 0,381257197 |
| Actr10  | -0,32 | 0,600120467 | -0,46 | 0,359450941 | 0,6   | 0,380860544 | 0,67  | 0,571146871 | 0,79  | 0,518216192 |
| Actr1a  | -0,18 | 0,744352714 | -0,17 | 0,777805564 | 0,36  | 0,599202081 | 0,22  | 0,71050512  | -0,41 | 0,499998316 |
| Actr1b  | -0,6  | 0,246849525 | -0,6  | 0,491478704 | 0,49  | 0,337509636 | 0,55  | 0,75555577  | -0,26 | 0,900126162 |
| Actr2   | -0,26 | 0,524729738 | -0,01 | 0,994486533 | 0,1   | 0,871283127 | 0,59  | 0,135706181 | 0,07  | 0,927536545 |
| Actr3   | -0,23 | 0,561977827 | 0,03  | 0,962354093 | -0,01 | 0,989500801 | 0,98  | 0,048470627 | 0,28  | 0,623304657 |
| Actr3b  | 0,28  | 0,589442341 | 0,41  | 0,692189927 | 0,95  | 0,235612389 | -0,52 | 0,596892735 | 0,42  | 0,792305774 |

|        |       |             |       |             |       |             |       |             |       |             |
|--------|-------|-------------|-------|-------------|-------|-------------|-------|-------------|-------|-------------|
| Actr5  | 0,31  | 0,636840455 | -0,23 | 0,835100355 | 0,08  | 0,907580464 | -0,14 | 0,827315876 | 0,21  | 0,859801406 |
| Actr6  | -0,56 | 0,249479695 | -0,31 | 0,448796542 | 1,04  | 0,269226294 | 0,12  | 0,943846121 | 0,54  | 0,710368081 |
| Actr8  | -0,39 | 0,493192804 | 0,09  | 0,88928164  | 0,49  | 0,36121902  | -0,7  | 0,37338484  | -0,26 | 0,809378825 |
| Actrt1 | -0,29 | 0,782876517 | 0,22  | 0,801259805 | -0,17 | 0,825782434 | -0,16 | 0,75983637  | 0,3   | 0,649575152 |
| Actrt2 | 0,02  | 0,978017159 | 0,24  | 0,797338097 | 0,07  | 0,943788892 | 0,19  | 0,765893203 | 0,08  | 0,933011676 |
| Actrt3 | -0,01 | 0,986795639 | -0,28 | 0,612645853 | -0,45 | 0,433328303 | -0,05 | 0,931250259 | -0,01 | 0,991480325 |
| Acvr1  | -0,75 | 0,344959365 | 0,35  | 0,761267765 | 0,25  | 0,624057916 | 0,21  | 0,8914104   | 0,24  | 0,872302501 |
| Acvr1b | 0,68  | 0,513313111 | 0,36  | 0,594180716 | 0,23  | 0,873259893 | -0,72 | 0,583138901 | -0,19 | 0,931519966 |
| Acvr1c | 0,8   | 0,27687302  | -0,01 | 0,994624814 | -0,24 | 0,693217111 | 0,32  | 0,743070986 | 0,69  | 0,394310393 |
| Acvr2a | -0,09 | 0,880074728 | -0,1  | 0,938162151 | 0,02  | 0,993379272 | 0,36  | 0,690664654 | 0,46  | 0,607522533 |
| Acvr2b | 0,04  | 0,967277212 | -0,24 | 0,690169085 | -0,08 | 0,949135765 | -0,02 | 0,989616509 | 0,05  | 0,976393169 |
| Acvr1  | 0,16  | 0,71602861  | -0,07 | 0,943915456 | 0,29  | 0,628048897 | -0,65 | 0,276093686 | -0,61 | 0,346861365 |
| Acy1   | -0,31 | 0,480721497 | -0,13 | 0,842663656 | 1,01  | 0,290123118 | 0,32  | 0,372962599 | -0,3  | 0,699671375 |
| Acy3   | -0,8  | 0,096574264 | -0,07 | 0,940633551 | 0,46  | 0,568619313 | -0,5  | 0,404293645 | -0,41 | 0,537240604 |
| Acyp1  | 0,46  | 0,312439966 | 0,6   | 0,609903902 | 0,44  | 0,53405345  | -0,69 | 0,323377855 | -0,34 | 0,603423878 |
| Acyp2  | 0,25  | 0,600680579 | 0,08  | 0,907052756 | -0,19 | 0,798711591 | -0,58 | 0,134275521 | 0,3   | 0,549181666 |
| Ada    | -0,27 | 0,762798673 | 0,01  | 0,998237793 | -1,04 | 0,055773356 | -2,34 | 0,052975479 | 0,12  | 0,947300798 |
| Adad1  | 0,07  | 0,891309235 | 0,03  | 0,972706967 | 0,43  | 0,479037325 | -0,13 | 0,7433032   | -0,02 | 0,979456872 |
| Adad2  | -0,01 | 0,991125401 | 0,29  | 0,785244931 | -0,45 | 0,429182409 | 0,2   | 0,534621072 | 0,21  | 0,746672639 |
| Adal   | -1,07 | 0,251014805 | -1,16 | 0,432687588 | 0,03  | 0,987003605 | 0,54  | 0,799835488 | -0,41 | 0,853838452 |
| Adam10 | 0,05  | 0,939858259 | -0,12 | 0,856319127 | 0,25  | 0,779970041 | 0,6   | 0,086890299 | -0,48 | 0,271576025 |
| Adam11 | 0,18  | 0,757032046 | 0,14  | 0,898952381 | -0,08 | 0,929871006 | 0,08  | 0,917846549 | -0,13 | 0,902540251 |
| Adam12 | -1,07 | 0,058225809 | -0,82 | 0,261054232 | 0,08  | 0,946627221 | 3,14  | 0,015893503 | -0,65 | 0,536721752 |
| Adam15 | -0,77 | 0,093379419 | -0,6  | 0,212039473 | 0,43  | 0,47647024  | -0,57 | 0,154588425 | -0,31 | 0,571122283 |
| Adam17 | -0,18 | 0,79249191  | 0,19  | 0,751382934 | 0,04  | 0,977827235 | 0,31  | 0,449837129 | -0,27 | 0,677702328 |
| Adam18 | 0     | 0,998210173 | 0,05  | 0,956934125 | -0,17 | 0,821229302 | -0,26 | 0,404359472 | -0,15 | 0,874352206 |
| Adam19 | -1,37 | 0,077161113 | -1,21 | 0,060440503 | 1,52  | 0,002978188 | 2,7   | 0,008795556 | -0,91 | 0,263026379 |
| Adam1a | -0,08 | 0,941798404 | -0,31 | 0,66248025  | -0,17 | 0,840836808 | -0,49 | 0,369402121 | -0,24 | 0,827032122 |
| Adam1b | -0,03 | 0,963251906 | 0,07  | 0,880048264 | -0,21 | 0,72316448  | -0,03 | 0,95852873  | 0     | 0,994637097 |
| Adam2  | 0,18  | 0,758136438 | -0,21 | 0,796482292 | -0,32 | 0,61483831  | 0,67  | 0,192516739 | 0,39  | 0,508734134 |
| Adam20 | 0,18  | 0,79795086  | 0,37  | 0,599495018 | -0,18 | 0,787905724 | -0,4  | 0,496598311 | -0,07 | 0,939448119 |
| Adam21 | -0,58 | 0,316599006 | -0,47 | 0,441083677 | -0,08 | 0,957564506 | 0,61  | 0,287840988 | 0,43  | 0,516721132 |
| Adam22 | -0,28 | 0,665460488 | 0,29  | 0,729880381 | -0,21 | 0,824460336 | -0,29 | 0,747440364 | 0,43  | 0,69655779  |
| Adam23 | -0,06 | 0,945504973 | 0,18  | 0,789299495 | 0,14  | 0,867543859 | -0,86 | 0,067623231 | -0,27 | 0,836715889 |
| Adam24 | 0,2   | 0,666546952 | 0,02  | 0,990052916 | -0,27 | 0,75008597  | 0,21  | 0,62296101  | 0,34  | 0,552810377 |

|          |       |             |       |             |       |             |       |             |       |             |
|----------|-------|-------------|-------|-------------|-------|-------------|-------|-------------|-------|-------------|
| Adam25   | 0,05  | 0,925089986 | 0,19  | 0,725431195 | -0,29 | 0,6021281   | -0,52 | 0,499390583 | -0,19 | 0,857136358 |
| Adam26a  | -0,05 | 0,931282908 | 0,04  | 0,958621018 | 0,1   | 0,889371168 | 0,13  | 0,778566413 | 0,2   | 0,743416848 |
| Adam26b  | 0,09  | 0,86343981  | -0,02 | 0,979551751 | -0,08 | 0,901816517 | -0,19 | 0,598473186 | -0,29 | 0,566248044 |
| Adam28   | -0,08 | 0,959458865 | 0,48  | 0,600177044 | -0,05 | 0,976092199 | -0,44 | 0,291638584 | 0,37  | 0,503212672 |
| Adam29   | 0,1   | 0,843029805 | -0,04 | 0,955382206 | -0,12 | 0,847506224 | 0,07  | 0,861959213 | 0,16  | 0,794586838 |
| Adam3    | 0,38  | 0,455001921 | 0,36  | 0,693906911 | 0,22  | 0,858393835 | -0,13 | 0,858632076 | -0,09 | 0,938464659 |
| Adam30   | -0,23 | 0,708175799 | -0,15 | 0,712500402 | 0,02  | 0,982607315 | 0,52  | 0,518532579 | 0,56  | 0,612054078 |
| Adam32   | 0,07  | 0,960597621 | -0,2  | 0,800821935 | -0,14 | 0,801262194 | 0,3   | 0,415968391 | 0,35  | 0,524829864 |
| Adam33   | -0,3  | 0,717603132 | 0,22  | 0,724479197 | -0,3  | 0,598179126 | -0,07 | 0,90300812  | 0,13  | 0,878966527 |
| Adam34   | 0,27  | 0,761364679 | 0,17  | 0,823246376 | 0,04  | 0,963199274 | 0,12  | 0,756738618 | 0,26  | 0,627798845 |
| Adam39   | 0,37  | 0,355118268 | -0,13 | 0,843162191 | 0,09  | 0,904057901 | 0,13  | 0,700431952 | 0,07  | 0,934185668 |
| Adam4    | 0,17  | 0,892823025 | -0,04 | 0,958621018 | -0,53 | 0,462643491 | 0,02  | 0,967883559 | -0,05 | 0,948935854 |
| Adam5    | 0,15  | 0,827788214 | 0,12  | 0,855389993 | 0,04  | 0,976138805 | 0,13  | 0,747537506 | 0,1   | 0,89204841  |
| Adam6a   | -0,06 | 0,954648978 | 0,23  | 0,703923817 | 0,12  | 0,88783743  | -0,3  | 0,699435233 | -0,31 | 0,784900163 |
| Adam6b   | -0,16 | 0,827055517 | -0,28 | 0,540905261 | -0,23 | 0,695930773 | 0,27  | 0,569280911 | 0,18  | 0,859663155 |
| Adam7    | 0,22  | 0,666546952 | -0,19 | 0,68442935  | -0,28 | 0,527929204 | 0,11  | 0,819236182 | -0,08 | 0,932742551 |
| Adam8    | 0,06  | 0,959218841 | 0,17  | 0,804394095 | 0,51  | 0,637321546 | -0,23 | 0,607543815 | -0,45 | 0,666758661 |
| Adam9    | 0,46  | 0,239601221 | 0,42  | 0,4977769   | -0,67 | 0,086523219 | 1,22  | 0,053873365 | 0,42  | 0,55356248  |
| Adamdec1 | 0,48  | 0,270547821 | 0,04  | 0,972776489 | 0,25  | 0,715403033 | 0,32  | 0,568512757 | 0,03  | 0,979392852 |
| Adamts1  | -0,15 | 0,734863705 | 0,23  | 0,68442935  | -0,17 | 0,777918093 | -0,03 | 0,963678375 | 0,01  | 0,991522479 |
| Adamts10 | -0,82 | 0,222236104 | -0,29 | 0,715847814 | 0,19  | 0,877162521 | -0,48 | 0,153721985 | -0,18 | 0,860058375 |
| Adamts12 | -0,89 | 0,297241742 | -0,7  | 0,196295439 | 0,87  | 0,264273523 | 3,17  | 0,033148792 | 0,1   | 0,959848565 |
| Adamts13 | -0,12 | 0,904043614 | 0,02  | 0,9860901   | -0,17 | 0,82162081  | -0,06 | 0,92561382  | -0,12 | 0,869765418 |
| Adamts14 | -0,12 | 0,911300691 | 0,32  | 0,615311543 | 0     | 0,997268369 | 0,06  | 0,930942343 | 0,21  | 0,765340194 |
| Adamts15 | 0,12  | 0,832696131 | 0,2   | 0,695689103 | -0,04 | 0,964493666 | -0,42 | 0,548190684 | -0,23 | 0,792343964 |
| Adamts16 | -0,04 | 0,965726777 | 0,34  | 0,778715283 | 0,29  | 0,751090942 | -0,37 | 0,821268181 | -0,63 | 0,628127128 |
| Adamts17 | -0,32 | 0,504621759 | -0,26 | 0,638366221 | 0,31  | 0,747599709 | 0,19  | 0,716478691 | -0,13 | 0,881943508 |
| Adamts18 | -0,06 | 0,95378345  | -0,36 | 0,573877973 | 0,6   | 0,361580981 | 0,02  | 0,989926105 | 0,03  | 0,982577187 |
| Adamts19 | 0,04  | 0,949362206 | 0     | 1           | 0,17  | 0,815794427 | 0,08  | 0,906588327 | 0     | 0,999340062 |
| Adamts2  | 0,11  | 0,934675994 | -0,01 | 0,994137877 | -0,03 | 0,9701931   | 0,47  | 0,415968391 | 0     | 0,997769477 |
| Adamts20 | 0,05  | 0,929470074 | -0,17 | 0,745130453 | -0,17 | 0,770526999 | 0,46  | 0,197764396 | 0,03  | 0,981913783 |
| Adamts3  | -0,65 | 0,36075848  | 0,93  | 0,642318146 | -0,13 | 0,922318683 | -0,14 | 0,907715509 | 1,75  | 0,097560409 |
| Adamts4  | -0,11 | 0,834744248 | 0,04  | 0,959837002 | 0,17  | 0,728270776 | 2,03  | 0,017429369 | 0,13  | 0,88282824  |
| Adamts5  | -1,41 | 0,132779189 | -1,21 | 0,24128832  | -0,21 | 0,903638403 | -0,32 | 0,81096279  | -0,95 | 0,395174487 |
| Adamts6  | -0,43 | 0,665037431 | -0,59 | 0,383872218 | 0,52  | 0,720069267 | -1,82 | 0,012175785 | 0,79  | 0,137167994 |

|          |       |             |       |             |       |             |       |             |       |             |
|----------|-------|-------------|-------|-------------|-------|-------------|-------|-------------|-------|-------------|
| Adamts7  | -0,81 | 0,096219097 | -0,46 | 0,572250784 | 1,36  | 0,186321498 | 3,55  | 0,016782885 | -1,08 | 0,286600165 |
| Adamts8  | -0,67 | 0,263813845 | 0,08  | 0,976423495 | -0,42 | 0,548288344 | 0,03  | 0,978717209 | 0,23  | 0,780016298 |
| Adamts9  | -0,25 | 0,591294109 | -0,01 | 0,992175086 | -0,28 | 0,775282779 | 1,93  | 0,02296991  | -0,11 | 0,917844354 |
| AdamtsI1 | -0,44 | 0,761120978 | -1,27 | 0,153524445 | -0,02 | 0,987094761 | -1,79 | 0,012175785 | -0,65 | 0,182387717 |
| AdamtsI2 | -0,15 | 0,835016158 | 0,4   | 0,301487527 | 0,62  | 0,169619185 | -2,37 | 0,01114554  | -0,31 | 0,675958562 |
| AdamtsI3 | 0,23  | 0,53593124  | -0,09 | 0,904361564 | -0,18 | 0,789802954 | -0,27 | 0,647770751 | -0,49 | 0,436708262 |
| AdamtsI4 | 0,88  | 0,088192224 | 0,97  | 0,222263752 | -1,02 | 0,033860713 | -0,8  | 0,19247613  | -0,08 | 0,937558003 |
| AdamtsI5 | -0,16 | 0,77354324  | 0,08  | 0,890738011 | 0,43  | 0,599127793 | -1,4  | 0,032162353 | -0,91 | 0,185914462 |
| Adap1    | 0,21  | 0,847613888 | -0,25 | 0,666450149 | -0,04 | 0,977177918 | 0,38  | 0,371151329 | 1,12  | 0,023869051 |
| Adap2    | 0,23  | 0,831697563 | 0,18  | 0,762968641 | 0,05  | 0,975982548 | -0,4  | 0,305854272 | -0,11 | 0,949544475 |
| Adap2os  | -0,17 | 0,809762393 | 0,33  | 0,449430056 | -0,05 | 0,946777487 | -0,35 | 0,597332937 | -0,04 | 0,978604922 |
| Adar     | 0,13  | 0,793209485 | 0,52  | 0,446315327 | -0,36 | 0,507058256 | 0,18  | 0,873093341 | 0,76  | 0,363127424 |
| Adarb1   | -0,34 | 0,430173798 | -0,5  | 0,346384135 | -0,17 | 0,79500424  | 0,53  | 0,188844849 | -0,26 | 0,6441349   |
| Adarb2   | -0,09 | 0,895870455 | -0,25 | 0,641035273 | 0,05  | 0,962766843 | 0,72  | 0,550164397 | 0     | 0,998444219 |
| Adat1    | -0,21 | 0,809201957 | -0,31 | 0,818072947 | 0,32  | 0,701508321 | -1,07 | 0,113007982 | -1,09 | 0,210614146 |
| Adat2    | 0,11  | 0,893283341 | -0,2  | 0,707806354 | 0,78  | 0,194619745 | 0,18  | 0,785618505 | -0,09 | 0,913274952 |
| Adat3    | -0,56 | 0,460693987 | 0,1   | 0,857211054 | 0,62  | 0,465936592 | 0,31  | 0,415968391 | 0,1   | 0,951429597 |
| Adck1    | -0,37 | 0,648730873 | -0,03 | 0,978904487 | 0,06  | 0,95204022  | 0,17  | 0,884707915 | 0,33  | 0,792234713 |
| Adck2    | 0,29  | 0,600392256 | -0,37 | 0,649611595 | 0,13  | 0,922274387 | -0,2  | 0,858632076 | -0,03 | 0,985269236 |
| Adck3    | -0,01 | 0,995778597 | -0,37 | 0,704013569 | -0,68 | 0,14251251  | -0,54 | 0,593121153 | -0,82 | 0,443763251 |
| Adck4    | 0,22  | 0,803557792 | 0,77  | 0,136079737 | 0,2   | 0,872180056 | -0,4  | 0,340065443 | -0,31 | 0,654129233 |
| Adck5    | -0,23 | 0,853962146 | 0,11  | 0,946885634 | 0,49  | 0,429975157 | -0,42 | 0,583935228 | -0,61 | 0,449599789 |
| Adcy1    | 0,3   | 0,636714456 | 0,38  | 0,411125721 | -0,05 | 0,949465404 | -0,63 | 0,097755932 | -0,06 | 0,935732697 |
| Adcy10   | -0,12 | 0,801811475 | -0,02 | 0,997700959 | 0,02  | 0,989772079 | 0,56  | 0,284968897 | 0,41  | 0,429106643 |
| Adcy2    | 0,5   | 0,176589418 | -0,37 | 0,472137499 | -0,13 | 0,869952072 | -0,01 | 0,996605641 | -0,1  | 0,943179098 |
| Adcy3    | -0,66 | 0,530329583 | -0,82 | 0,187729631 | 1,21  | 0,042407993 | 0,29  | 0,720870706 | -0,5  | 0,76521225  |
| Adcy4    | 0,31  | 0,409977631 | 0,36  | 0,4009169   | -0,52 | 0,260200895 | 0,14  | 0,692059018 | 0,07  | 0,939448119 |
| Adcy5    | 0,08  | 0,934458125 | 0,25  | 0,782652703 | 0,39  | 0,552356597 | -0,66 | 0,292303436 | -0,56 | 0,487945047 |
| Adcy6    | -1,11 | 0,116437486 | -0,35 | 0,487771533 | 0,91  | 0,116607178 | -0,52 | 0,471850373 | -0,68 | 0,376217331 |
| Adcy7    | 0,07  | 0,947193703 | 0,03  | 0,980796811 | 0,24  | 0,779428    | -0,5  | 0,234277327 | -0,01 | 0,989838283 |
| Adcy8    | 0,27  | 0,593540946 | 0,58  | 0,212039473 | -0,09 | 0,921956183 | -0,37 | 0,367967781 | -0,03 | 0,97425848  |
| Adcy9    | 0,07  | 0,934482351 | -0,85 | 0,15478032  | 0,36  | 0,720389578 | -0,56 | 0,367209881 | -0,24 | 0,775465662 |
| Adcyp1   | 0,07  | 0,932671813 | 0,14  | 0,861828582 | -0,01 | 0,993379272 | -0,23 | 0,609249924 | -0,2  | 0,825966687 |
| Adcyp1r1 | 0,35  | 0,465168175 | 0,02  | 0,988074738 | -0,2  | 0,767681595 | -0,19 | 0,647789119 | -0,02 | 0,980932608 |
| Add1     | -0,39 | 0,272587269 | -0,06 | 0,938991098 | 0,26  | 0,81808517  | -0,01 | 0,992636995 | -0,37 | 0,673577848 |



|           |       |             |       |             |       |             |       |             |       |             |
|-----------|-------|-------------|-------|-------------|-------|-------------|-------|-------------|-------|-------------|
| Add2      | -0,77 | 0,260634235 | -0,48 | 0,499573414 | -0,48 | 0,497205965 | -0,78 | 0,126608574 | -0,53 | 0,327246128 |
| Add3      | -0,24 | 0,605354232 | -0,63 | 0,353933074 | -0,44 | 0,744336237 | -1,23 | 0,028172198 | -1,2  | 0,044184099 |
| Adgb      | 0,04  | 0,969949459 | 0,18  | 0,73623784  | -0,16 | 0,806044178 | -0,01 | 0,981226068 | 0,12  | 0,853225105 |
| Adgra1    | 0,11  | 0,858063681 | -0,08 | 0,941624351 | 0,06  | 0,949135765 | -0,11 | 0,871972247 | 0,16  | 0,871038748 |
| Adgra2    | -0,87 | 0,077161113 | -0,08 | 0,953747513 | 0,05  | 0,952019801 | -0,05 | 0,951697927 | -0,09 | 0,939948423 |
| Adgra3    | -0,3  | 0,69184055  | 0,07  | 0,945366485 | 0,59  | 0,536368741 | -0,18 | 0,900918368 | -0,08 | 0,965141509 |
| Adgrb1    | -0,04 | 0,953269094 | 0,1   | 0,912535732 | -0,37 | 0,544452468 | -0,26 | 0,41668212  | -0,32 | 0,510946331 |
| Adgrb2    | -0,21 | 0,595596483 | -0,2  | 0,809683705 | -0,17 | 0,793369986 | 0,12  | 0,864719338 | -0,13 | 0,879206646 |
| Adgrb3    | -0,22 | 0,766541178 | 0,13  | 0,827141394 | 0,21  | 0,727554633 | -1,19 | 0,439173785 | -0,67 | 0,714477719 |
| Adgrd1    | -0,49 | 0,412575527 | 0,52  | 0,493391321 | 0,29  | 0,641366948 | -1,01 | 0,175666582 | -0,24 | 0,7983507   |
| Adgrd2-ps | 0,22  | 0,698332739 | 0,11  | 0,850762872 | -0,25 | 0,700186861 | -0,07 | 0,932633294 | 0,03  | 0,976743304 |
| Adgre1    | -0,18 | 0,816710776 | -0,4  | 0,518621692 | -0,04 | 0,973732268 | 0,82  | 0,208729417 | -0,42 | 0,642493829 |
| Adgre4    | 0,15  | 0,839881823 | 0,22  | 0,748345069 | 0,01  | 0,993379272 | -0,27 | 0,592584946 | -0,23 | 0,74349504  |
| Adgre5    | -0,46 | 0,285699243 | -0,71 | 0,158579743 | 0,84  | 0,180296439 | -1,15 | 0,015975596 | -0,46 | 0,290947419 |
| Adgrf1    | 0,49  | 0,541259525 | 0,17  | 0,855632384 | -0,18 | 0,84847388  | -0,04 | 0,957427513 | 0,47  | 0,406238373 |
| Adgrf2    | 0,31  | 0,55640978  | -0,09 | 0,912535732 | 0,17  | 0,736837174 | 0,5   | 0,422937251 | 0,03  | 0,979456872 |
| Adgrf3    | 0,09  | 0,907419323 | 0,57  | 0,323743964 | -0,02 | 0,985347628 | -0,35 | 0,601996277 | 0,14  | 0,889106241 |
| Adgrf4    | 0,45  | 0,418088138 | 0,36  | 0,430154065 | 0,15  | 0,835677021 | -0,49 | 0,212666842 | 0,2   | 0,723103887 |
| Adgrf5    | 0,19  | 0,661010124 | 0,1   | 0,812483316 | -0,13 | 0,807926482 | -0,32 | 0,301051081 | -0,08 | 0,912326206 |
| Adgrg1    | -0,17 | 0,656318528 | -0,3  | 0,473163236 | 0,04  | 0,962766843 | -0,94 | 0,026139775 | -0,79 | 0,061556069 |
| Adgrg2    | -0,2  | 0,815489016 | -1,03 | 0,314334578 | 0,62  | 0,492530241 | 1,04  | 0,200892667 | -0,1  | 0,948163009 |
| Adgrg3    | -0,78 | 0,221302977 | -0,34 | 0,544440118 | -0,35 | 0,516254562 | 0,21  | 0,556481849 | -0,36 | 0,596092228 |
| Adgrg5    | 0,13  | 0,797024882 | 0,32  | 0,459417799 | 0,49  | 0,645600121 | -0,08 | 0,95852873  | -0,01 | 0,992694729 |
| Adgrg6    | -0,28 | 0,683423361 | -0,02 | 0,994137877 | 1,05  | 0,387573388 | -3,03 | 0,010913137 | 0,54  | 0,69655779  |
| Adgrg7    | 0,37  | 0,597519827 | 0,09  | 0,902148738 | -0,23 | 0,778707372 | -0,02 | 0,978782666 | -0,01 | 0,990633766 |
| Adgrl1    | -0,31 | 0,645057952 | -0,15 | 0,828219939 | 0,63  | 0,507988847 | -1,09 | 0,031868323 | -0,48 | 0,46881734  |
| Adgrl2    | 0,46  | 0,269151748 | 0,43  | 0,446735639 | -0,42 | 0,569973916 | 1,18  | 0,065831648 | 0,84  | 0,128620629 |
| Adgrl3    | -0,57 | 0,597519827 | -0,11 | 0,929324024 | -0,17 | 0,78426978  | -0,38 | 0,298021209 | -0,12 | 0,930302738 |
| Adgrl4    | 0,07  | 0,867953985 | 0,04  | 0,953044648 | -0,6  | 0,404404953 | -1,19 | 0,021420271 | -0,2  | 0,740830591 |
| Adgrv1    | -0,28 | 0,39502332  | 0,24  | 0,622742911 | 0     | 0,996286252 | 0,06  | 0,914640741 | 0,03  | 0,979392852 |
| Adh1      | -0,33 | 0,541417213 | -1,01 | 0,353692234 | -0,15 | 0,967304745 | -2,65 | 0,009399265 | -1,46 | 0,430924058 |
| Adh4      | 0,02  | 0,984972115 | 0,03  | 0,978689001 | 0     | 0,997596521 | -0,53 | 0,332395451 | -0,54 | 0,603798473 |
| Adh5      | -0,28 | 0,757722858 | 0,11  | 0,855461386 | 1,12  | 0,201394322 | 0,11  | 0,924110762 | 0,24  | 0,861977667 |
| Adh6a     | 0,11  | 0,819752457 | 0,08  | 0,916730432 | -0,04 | 0,964851619 | 0,19  | 0,8429154   | 0,18  | 0,838957343 |
| Adh6b     | -0,38 | 0,496008309 | -1,42 | 0,276405631 | -0,18 | 0,902672106 | 1,94  | 0,036676931 | 0,08  | 0,949544475 |

|          |       |             |       |             |       |             |       |             |       |             |
|----------|-------|-------------|-------|-------------|-------|-------------|-------|-------------|-------|-------------|
| Adh6-ps1 | 0,07  | 0,926452636 | 0,16  | 0,667502888 | 0,02  | 0,984778342 | 0,05  | 0,942032046 | 0,29  | 0,697336851 |
| Adh7     | 0,32  | 0,667813356 | -0,2  | 0,810875398 | -0,28 | 0,668690906 | -3,96 | 0,007965753 | -1,49 | 0,20963273  |
| Adhfe1   | 1,86  | 0,05916852  | 1,54  | 0,087315688 | -0,16 | 0,867571963 | 1,07  | 0,52828854  | 0,8   | 0,703496918 |
| Adi1     | -0,4  | 0,751235961 | 0,08  | 0,920755087 | -0,09 | 0,969247498 | -0,67 | 0,336899263 | -0,89 | 0,199441919 |
| Adig     | 0,09  | 0,909477787 | 0,07  | 0,96172404  | -0,13 | 0,907951869 | -0,59 | 0,447808471 | -0,06 | 0,977903513 |
| Adipoq   | 0,26  | 0,62872508  | 0,28  | 0,572692182 | 0,24  | 0,709317317 | -0,98 | 0,250076047 | -0,96 | 0,328821044 |
| Adipor1  | -0,24 | 0,54401985  | -0,11 | 0,88741189  | 0,1   | 0,914867655 | 0,51  | 0,186116773 | -0,24 | 0,655956123 |
| Adipor2  | -0,18 | 0,667152425 | -0,34 | 0,49252156  | 0,4   | 0,452410597 | -0,97 | 0,058668905 | -0,34 | 0,535065209 |
| Adk      | -0,71 | 0,544177375 | -0,39 | 0,845936068 | 0,88  | 0,062420645 | -0,66 | 0,522511755 | -0,58 | 0,474007701 |
| Adm      | -0,1  | 0,870145675 | 0,3   | 0,636773912 | -0,15 | 0,908269557 | 1,26  | 0,241841256 | -0,72 | 0,549785483 |
| Adm2     | 0,18  | 0,761457464 | -0,01 | 0,994137877 | -0,31 | 0,565822909 | 0,18  | 0,71853109  | -0,23 | 0,699060093 |
| Adnp     | 0,53  | 0,696425185 | -0,29 | 0,818301748 | 0,14  | 0,911634383 | 0,21  | 0,948968934 | -0,72 | 0,811975973 |
| Adnp2    | -0,42 | 0,638305806 | 0,02  | 0,982332924 | -0,38 | 0,422289002 | -0,38 | 0,581624426 | -0,37 | 0,623214829 |
| Ado      | -0,19 | 0,729638783 | 0,01  | 0,985413376 | 0,48  | 0,321560439 | 0,29  | 0,407916841 | -0,28 | 0,649846438 |
| Adora1   | 0,3   | 0,488690976 | -0,06 | 0,933320126 | 0,24  | 0,772749182 | 0,23  | 0,779017952 | 0,07  | 0,947437555 |
| Adora2a  | -0,22 | 0,617833707 | 0,29  | 0,735689605 | 0,44  | 0,495166869 | 0,02  | 0,986768223 | 0,04  | 0,969617491 |
| Adora2b  | 0,09  | 0,897717279 | 0,06  | 0,927470288 | 0,23  | 0,814575035 | -0,32 | 0,435927433 | -0,09 | 0,932270271 |
| Adora3   | -0,08 | 0,968500829 | -0,44 | 0,854940418 | -0,46 | 0,550662565 | -0,06 | 0,967866794 | -0,96 | 0,472839454 |
| Adpgk    | -0,16 | 0,832947001 | -0,06 | 0,942593581 | -0,04 | 0,97548193  | 0,3   | 0,438416463 | -0,2  | 0,853041033 |
| Adprh    | 0,1   | 0,85309792  | -0,06 | 0,912535732 | -0,23 | 0,693217111 | 0,17  | 0,665766782 | -0,19 | 0,773718691 |
| Adprh1   | 0,11  | 0,902861556 | -0,23 | 0,756778611 | -0,2  | 0,674869152 | 0,33  | 0,549998965 | 0,16  | 0,864004866 |
| Adprh2   | -0,03 | 0,984972115 | -0,23 | 0,643895096 | 0,35  | 0,779970041 | -0,65 | 0,159190886 | -0,28 | 0,745574572 |
| Adprm    | 0,35  | 0,632053719 | 0,3   | 0,66315423  | -0,5  | 0,497205965 | -1,36 | 0,029229383 | -0,33 | 0,540089233 |
| Adra1a   | 0,16  | 0,728530978 | 0,04  | 0,977480225 | -0,11 | 0,900961103 | 0     | 1           | 0,09  | 0,932268703 |
| Adra1b   | -0,34 | 0,730258012 | -0,04 | 0,980518468 | -0,31 | 0,565632648 | 0,18  | 0,735358224 | -0,16 | 0,91314596  |
| Adra1d   | -0,3  | 0,565823399 | 0     | 0,998237793 | -0,29 | 0,702689055 | 0,04  | 0,932489351 | 0,21  | 0,789294096 |
| Adra2a   | 0,36  | 0,777335496 | -0,39 | 0,668463436 | 0,43  | 0,407156845 | 0,54  | 0,607090688 | -0,27 | 0,808079104 |
| Adra2b   | 1,51  | 0,029958398 | 0,72  | 0,448796542 | -0,28 | 0,68693754  | 0,76  | 0,29786927  | -0,1  | 0,944318268 |
| Adra2c   | -0,35 | 0,622541886 | -0,16 | 0,855190552 | 0,28  | 0,744387748 | -1,07 | 0,151723743 | 0,06  | 0,975441362 |
| Adrb1    | 0,05  | 0,922118639 | 0,02  | 0,974580396 | -0,13 | 0,798711591 | -0,6  | 0,298756888 | -0,04 | 0,97425848  |
| Adrb2    | -0,24 | 0,600800451 | 0,18  | 0,849876561 | -0,84 | 0,332065223 | -1,26 | 0,173468279 | 0,36  | 0,763240477 |
| Adrb3    | 0,1   | 0,887389217 | 0,21  | 0,807175471 | -0,18 | 0,784439184 | 0,11  | 0,90213506  | -0,13 | 0,898128203 |
| Adrbk1   | -0,15 | 0,700358581 | -0,15 | 0,751316952 | 0,64  | 0,328190621 | -0,05 | 0,921036173 | 0,09  | 0,927536545 |
| Adrbk2   | 0,73  | 0,186493119 | 0,55  | 0,594415097 | -0,17 | 0,809137779 | -0,93 | 0,182972024 | -0,38 | 0,550083777 |
| Adrm1    | 0,05  | 0,964154899 | -0,17 | 0,792541703 | -0,09 | 0,940213182 | 0,26  | 0,534171194 | 0,01  | 0,988374688 |

|          |       |             |       |             |       |             |       |             |       |             |
|----------|-------|-------------|-------|-------------|-------|-------------|-------|-------------|-------|-------------|
| Adsl     | -0,89 | 0,129299808 | -0,22 | 0,781046971 | 0,13  | 0,873457545 | 0,32  | 0,514547594 | -0,05 | 0,960233569 |
| Adss     | -0,19 | 0,758067417 | -0,04 | 0,942965593 | 0,15  | 0,892894631 | 0,9   | 0,080032206 | 0,66  | 0,218199508 |
| Adssl1   | 0,67  | 0,639070738 | 0,32  | 0,715688609 | 1,11  | 0,081005692 | -0,25 | 0,677875835 | 0,05  | 0,962155794 |
| Adtrp    | 0,5   | 0,571153956 | -0,14 | 0,824916914 | 0,01  | 0,99383354  | -0,07 | 0,911302302 | -0,38 | 0,714477719 |
| Aebp1    | -0,69 | 0,36075848  | -0,39 | 0,589100557 | 0,53  | 0,337509636 | 1,53  | 0,008180428 | -0,71 | 0,198832044 |
| Aebp2    | 0,39  | 0,596550801 | -0,14 | 0,790939978 | 0,08  | 0,937901585 | 0,34  | 0,523262994 | 0,18  | 0,821140509 |
| Aen      | -0,15 | 0,793209485 | -0,13 | 0,85329997  | -0,11 | 0,895520077 | 0,39  | 0,379854512 | -0,16 | 0,830813323 |
| Aes      | -0,39 | 0,316599006 | -0,39 | 0,641792237 | 0,16  | 0,791504463 | 0,48  | 0,203390007 | -0,39 | 0,46990734  |
| AF067061 | -0,02 | 0,984183188 | 0,15  | 0,89647435  | -0,23 | 0,777417583 | 0,08  | 0,908535783 | 0,6   | 0,364606685 |
| AF067063 | 0,07  | 0,946792769 | -0,11 | 0,919873208 | 0,06  | 0,938702388 | -0,33 | 0,412390686 | -0,18 | 0,816435488 |
| AF251705 | -0,1  | 0,926007268 | 0,01  | 0,998345861 | 0,04  | 0,960666071 | 0,23  | 0,810172317 | 0,55  | 0,481873486 |
| AF357341 | -0,08 | 0,91207777  | -0,02 | 0,975103597 | 0,09  | 0,893086995 | 0,02  | 0,973617916 | -0,23 | 0,759161888 |
| AF357355 | 0,34  | 0,579630863 | 0     | 1           | -0,03 | 0,985326269 | -0,03 | 0,980890499 | -0,01 | 0,993472868 |
| AF357399 | -0,23 | 0,828767158 | 0,12  | 0,896322235 | 0,38  | 0,772008734 | -0,1  | 0,909976349 | -0,06 | 0,973348024 |
| AF357425 | 1,01  | 0,718098617 | -0,31 | 0,786394409 | 0,08  | 0,980746701 | -1,02 | 0,457747879 | -1,2  | 0,559845734 |
| AF357426 | 0,36  | 0,706208727 | 0,03  | 0,947782681 | -0,06 | 0,923350407 | -0,17 | 0,673534755 | -0,1  | 0,913553402 |
| AF357428 | 0,26  | 0,656034838 | 0,14  | 0,781665479 | -0,06 | 0,923350407 | 0,07  | 0,855041248 | 0,21  | 0,829444633 |
| AF366264 | 0,47  | 0,597519827 | 0,1   | 0,965147491 | -0,79 | 0,114280228 | -0,59 | 0,490447708 | 0,03  | 0,984125319 |
| AF529169 | -0,03 | 0,968370059 | -0,18 | 0,763005394 | -0,11 | 0,867020304 | 0,79  | 0,229859806 | 0,21  | 0,860058375 |
| Afap1    | -0,07 | 0,932826874 | 0,28  | 0,508154692 | -0,03 | 0,978840171 | 0,59  | 0,552672695 | 0,19  | 0,898194603 |
| Afap1l1  | -0,88 | 0,083335073 | -0,68 | 0,18701686  | 0,78  | 0,180205458 | 0,07  | 0,894580364 | -0,46 | 0,286600165 |
| Afap1l2  | 0,01  | 0,995150704 | 0,85  | 0,228451204 | -0,44 | 0,622546805 | -3,09 | 0,017754177 | 0,08  | 0,968130547 |
| Aff1     | 0,59  | 0,233235566 | 0,26  | 0,594415097 | -0,41 | 0,43706094  | -0,81 | 0,055073402 | -0,08 | 0,916173996 |
| Aff2     | 0,55  | 0,193980646 | -0,03 | 0,973945454 | -0,11 | 0,89916929  | 0,13  | 0,839333217 | 0,06  | 0,956610289 |
| Aff3     | -0,63 | 0,20299588  | -0,07 | 0,906201358 | 0,19  | 0,766194875 | -0,2  | 0,631857992 | -0,28 | 0,844105751 |
| Aff4     | 0,21  | 0,68412924  | 0,11  | 0,829923566 | -0,22 | 0,678840444 | -0,31 | 0,340897191 | -0,08 | 0,91314596  |
| Afg3l1   | -0,12 | 0,839375532 | -0,08 | 0,87020091  | -0,16 | 0,876005604 | 0,92  | 0,097559299 | 0,32  | 0,681597394 |
| Afg3l2   | -0,75 | 0,295679441 | 0,18  | 0,789051952 | 0,86  | 0,261966689 | 0,07  | 0,909976349 | 0,28  | 0,749887358 |
| Afm      | 0,13  | 0,7987021   | -0,37 | 0,664787536 | -0,13 | 0,818840027 | 0,48  | 0,183183685 | 0,04  | 0,979456872 |
| Afmid    | -0,32 | 0,738714467 | -0,03 | 0,978528738 | 0,51  | 0,683917899 | 0,18  | 0,87148686  | 0,07  | 0,969994712 |
| Afp      | 0,14  | 0,866609637 | -0,12 | 0,832194263 | -0,21 | 0,800107725 | 0,35  | 0,313267381 | 0,15  | 0,849560772 |
| Aftph    | 0,63  | 0,176884717 | 1,03  | 0,153524445 | 0     | 0,997220401 | -0,73 | 0,095061758 | 0,03  | 0,97425848  |
| Aga      | -0,11 | 0,828498045 | 0,02  | 0,9860901   | -0,08 | 0,963221639 | -0,77 | 0,160911751 | -0,42 | 0,419557334 |
| Agap1    | -0,26 | 0,568067613 | -0,09 | 0,923044405 | 0,22  | 0,749607234 | 0,12  | 0,858877782 | -0,23 | 0,744117522 |
| Agap2    | -0,4  | 0,443068183 | -0,04 | 0,979551751 | -0,26 | 0,74860644  | -0,25 | 0,651916561 | -0,64 | 0,395349481 |

|         |       |             |       |             |       |             |       |             |       |             |
|---------|-------|-------------|-------|-------------|-------|-------------|-------|-------------|-------|-------------|
| Agap3   | -0,6  | 0,111150557 | -0,35 | 0,561035617 | 0,36  | 0,543291636 | 1,05  | 0,045541547 | 0,06  | 0,940438527 |
| Agbl1   | 0,35  | 0,676906193 | -0,37 | 0,765982952 | -0,3  | 0,779970041 | 1,18  | 0,05745194  | 0,72  | 0,311343214 |
| Agbl2   | 0,13  | 0,854532238 | -0,03 | 0,965039248 | -0,2  | 0,840915336 | 0,08  | 0,944337552 | 0,2   | 0,861506431 |
| Agbl3   | -0,46 | 0,537473384 | -0,19 | 0,731621986 | 0,62  | 0,253176605 | -0,33 | 0,315877703 | -0,34 | 0,553650211 |
| Agbl4   | 0,37  | 0,465168175 | -0,05 | 0,956217122 | -0,37 | 0,597165314 | -0,05 | 0,95852873  | -0,03 | 0,979456872 |
| Agbl5   | -0,07 | 0,948732503 | 0     | 0,999395995 | 0,1   | 0,92807676  | -0,19 | 0,625019874 | -0,14 | 0,861056054 |
| Ager    | 0,58  | 0,526856715 | 0     | 0,999210601 | 0,06  | 0,950846671 | 0,09  | 0,923119077 | -0,24 | 0,794586838 |
| Agfg1   | 0,06  | 0,923500418 | 0,14  | 0,816673187 | -0,07 | 0,904057901 | 0,29  | 0,441112475 | 0,56  | 0,203422529 |
| Agfg2   | 0,14  | 0,859062559 | -0,64 | 0,314703215 | -0,29 | 0,757498725 | -0,12 | 0,882646915 | -0,52 | 0,469148703 |
| Aggf1   | 0,16  | 0,731184324 | 0,05  | 0,979338536 | 0,71  | 0,512679769 | -0,24 | 0,61232125  | -0,93 | 0,360726287 |
| Agk     | -0,56 | 0,463686701 | -0,57 | 0,363298292 | -0,2  | 0,744043627 | 0,04  | 0,945637088 | -0,24 | 0,696953886 |
| AgI     | 0,27  | 0,805603729 | -0,6  | 0,286908359 | 0,47  | 0,577789393 | -0,57 | 0,483554745 | -0,77 | 0,338461772 |
| Agmat   | 0,2   | 0,867692799 | -0,05 | 0,974580396 | 0     | 0,998479656 | 0,07  | 0,927735789 | -0,12 | 0,894958623 |
| Agmo    | -0,94 | 0,472847723 | -0,7  | 0,415740305 | -0,22 | 0,890842571 | 1,17  | 0,19000759  | -0,53 | 0,684349871 |
| Ago1    | -0,4  | 0,417009267 | -0,03 | 0,984812702 | 0,04  | 0,976991108 | -0,26 | 0,623313665 | -0,93 | 0,065968102 |
| Ago2    | -0,08 | 0,892124736 | -0,16 | 0,741529472 | 0,17  | 0,759636126 | 0,47  | 0,367209881 | 0,13  | 0,878966527 |
| Ago3    | -0,62 | 0,461113298 | 0,06  | 0,954024651 | 0,39  | 0,660920525 | -0,44 | 0,471397735 | -0,25 | 0,826632866 |
| Ago4    | -0,15 | 0,923937847 | -0,8  | 0,605851161 | -0,03 | 0,970387898 | 0,16  | 0,874607411 | -0,5  | 0,583279373 |
| Agpat1  | -0,27 | 0,586458491 | -0,06 | 0,963478322 | 0,36  | 0,433481425 | 0,03  | 0,961963439 | -0,18 | 0,872665918 |
| Agpat2  | 0,2   | 0,84900712  | 0,69  | 0,586721336 | -0,04 | 0,978554254 | -1,32 | 0,096120954 | 0,1   | 0,925858284 |
| Agpat3  | -0,41 | 0,600952042 | -0,26 | 0,564634931 | 0,42  | 0,411265008 | 0,19  | 0,84134133  | 0,13  | 0,912250982 |
| Agpat4  | 0,05  | 0,948926586 | -0,52 | 0,396493445 | 0,32  | 0,465936592 | 0,61  | 0,476999373 | -0,04 | 0,979341305 |
| Agpat5  | 0,1   | 0,919129818 | -0,19 | 0,674468926 | -0,5  | 0,548288344 | 1,26  | 0,017388467 | 0,48  | 0,328082125 |
| Agpat9  | 0,29  | 0,778869381 | 0,17  | 0,808498635 | -0,16 | 0,840193995 | 0,98  | 0,026588488 | 0,01  | 0,992607235 |
| Agps    | 0,17  | 0,764189777 | 0,15  | 0,79295936  | 0,88  | 0,163016798 | 0,73  | 0,0864017   | 0,66  | 0,168781914 |
| Agr2    | -0,13 | 0,826568449 | 0,03  | 0,96752568  | -0,35 | 0,591404136 | -0,12 | 0,859917636 | 0,06  | 0,947901649 |
| Agr3    | -0,44 | 0,217539055 | 0,05  | 0,959837002 | 0,11  | 0,854115638 | -0,17 | 0,826437156 | 0,17  | 0,873357312 |
| Agrn    | -0,2  | 0,625617202 | 0,31  | 0,674709201 | -0,06 | 0,946478083 | -0,45 | 0,402631598 | -0,31 | 0,561985704 |
| Agpr    | -0,14 | 0,838208309 | -0,1  | 0,927804354 | -0,16 | 0,847506224 | 0,07  | 0,922246542 | 0,42  | 0,427311219 |
| Agt     | -0,19 | 0,742618851 | -0,08 | 0,894022563 | -0,28 | 0,628978443 | -0,08 | 0,8556361   | -0,63 | 0,164923725 |
| Agtbpb1 | -0,06 | 0,955200574 | -0,12 | 0,808110364 | 0,2   | 0,794542194 | -0,16 | 0,700126136 | 0,21  | 0,765809384 |
| Agtr1a  | -0,38 | 0,757032046 | -0,24 | 0,817110093 | -0,34 | 0,727874974 | -1,15 | 0,090583584 | -0,61 | 0,313564306 |
| Agtr1b  | -0,34 | 0,595222504 | 0,6   | 0,703929085 | -0,62 | 0,345313881 | -0,65 | 0,650844426 | 0,32  | 0,813308036 |
| Agtr2   | 0,05  | 0,966775766 | 0,07  | 0,932292974 | 0,15  | 0,823823322 | 0,46  | 0,55067293  | 0,71  | 0,226271585 |
| Agtrap  | 1,15  | 0,111767257 | 1,16  | 0,131076642 | -0,38 | 0,705074309 | -0,28 | 0,692179512 | 0,52  | 0,363127424 |

|          |       |             |       |             |       |             |       |             |       |             |
|----------|-------|-------------|-------|-------------|-------|-------------|-------|-------------|-------|-------------|
| Agxt     | 0,17  | 0,782889069 | 0,03  | 0,973945454 | 0,21  | 0,763233047 | 0,29  | 0,791056607 | 0,26  | 0,838219021 |
| Agxt2    | 0,15  | 0,846313357 | 0,28  | 0,834031961 | -0,15 | 0,838289412 | -0,26 | 0,548798637 | -0,08 | 0,948935854 |
| Ahctf1   | -0,13 | 0,883923631 | -0,27 | 0,810340604 | 0,15  | 0,865827123 | -0,03 | 0,968211182 | -0,07 | 0,940092696 |
| Ahcy     | -0,27 | 0,840909921 | -0,53 | 0,485712513 | 0,76  | 0,190867064 | 0,52  | 0,233129138 | 0,02  | 0,988369133 |
| Ahcyl1   | 0,03  | 0,969577981 | 0,2   | 0,698293004 | 0,66  | 0,610650844 | -0,67 | 0,253851097 | -0,25 | 0,789358981 |
| Ahcyl2   | -0,37 | 0,600861507 | 0,13  | 0,857503073 | 0,57  | 0,462822883 | -0,03 | 0,957596559 | 0,12  | 0,86570087  |
| Ahdc1    | -0,26 | 0,531163951 | 0,06  | 0,920577656 | 0,32  | 0,597555586 | -0,78 | 0,051749824 | -0,3  | 0,546863793 |
| Ahi1     | 0     | 0,999536558 | -1    | 0,106620181 | 0,7   | 0,449013439 | 0,72  | 0,334703896 | 0,36  | 0,718869886 |
| Ahnak    | 0,01  | 0,987754269 | -0,25 | 0,668839557 | 0,11  | 0,897233315 | -0,2  | 0,569599525 | -0,32 | 0,641928139 |
| Ahnak2   | 0,25  | 0,630905267 | 0,72  | 0,360324171 | -0,1  | 0,919116989 | -1,36 | 0,011245132 | -0,18 | 0,760555206 |
| Ahr      | -0,31 | 0,597519827 | 0,31  | 0,569612894 | 0,23  | 0,841563482 | -0,83 | 0,221467894 | 0,03  | 0,986767228 |
| Ahrr     | -0,08 | 0,9231839   | -0,22 | 0,787285346 | -0,12 | 0,911506558 | -0,3  | 0,630104458 | -0,15 | 0,853107295 |
| Ahsa1    | 0     | 0,999457246 | -0,22 | 0,733759208 | 0,14  | 0,892858294 | 0,38  | 0,367163544 | 0,17  | 0,849295769 |
| Ahsa2    | -0,05 | 0,957118942 | 0,02  | 0,987162285 | -0,18 | 0,866424417 | 0,64  | 0,383645892 | 0,75  | 0,294789365 |
| Ahsg     | 0,11  | 0,846447446 | -0,2  | 0,697354745 | -0,17 | 0,963199274 | -0,23 | 0,572854044 | -0,49 | 0,533119029 |
| Ahsp     | -0,02 | 0,964894892 | -0,01 | 0,982993454 | -0,06 | 0,923396625 | -0,03 | 0,943143586 | -0,17 | 0,765809384 |
| AI115009 | -0,26 | 0,534017117 | -0,15 | 0,772036397 | -0,09 | 0,89906051  | 0,15  | 0,705635022 | -0,22 | 0,708533352 |
| AI182371 | -0,07 | 0,923035054 | 0,34  | 0,765356458 | 0,12  | 0,883337105 | -0,96 | 0,319845549 | 0,08  | 0,961749007 |
| AI197445 | -0,05 | 0,972667767 | 0,46  | 0,514920042 | -0,37 | 0,60848236  | 0,1   | 0,869855587 | -0,09 | 0,912890826 |
| AI314180 | -0,19 | 0,761120978 | 0,06  | 0,914014028 | -0,16 | 0,84847388  | 0,11  | 0,757370183 | 0,34  | 0,551972106 |
| AI314278 | 0,15  | 0,747211305 | -0,06 | 0,913619068 | 0,18  | 0,711135497 | -0,25 | 0,571686947 | -0,21 | 0,735192953 |
| AI413582 | 0,7   | 0,186426897 | 0,2   | 0,764157038 | -0,43 | 0,497205965 | -0,9  | 0,044580337 | 1,06  | 0,044250711 |
| AI414108 | -0,12 | 0,839375532 | 0,07  | 0,883843639 | -0,25 | 0,686440052 | -0,09 | 0,822372301 | -0,12 | 0,902101131 |
| AI427809 | -0,07 | 0,926181408 | -0,04 | 0,953198116 | -0,55 | 0,404341148 | 0,13  | 0,708945614 | -0,43 | 0,446722891 |
| AI429214 | 0,09  | 0,937862138 | 0,25  | 0,74245372  | 0     | 0,99879674  | 0,19  | 0,939446012 | 0,52  | 0,843351909 |
| AI450353 | -0,3  | 0,882943798 | -1    | 0,611052267 | 0,58  | 0,560191012 | -0,92 | 0,079389418 | -0,43 | 0,559794251 |
| AI463170 | 0,06  | 0,948926586 | -0,08 | 0,859954464 | 0,04  | 0,967430627 | -0,05 | 0,907662772 | -0,2  | 0,765565207 |
| AI463229 | 0,11  | 0,832696131 | -0,13 | 0,752804236 | -0,17 | 0,783326867 | -0,02 | 0,965664624 | 0,11  | 0,875421436 |
| AI464131 | 0,34  | 0,430696208 | -0,43 | 0,614530823 | 0,13  | 0,859819846 | -0,05 | 0,920640884 | -0,17 | 0,847142068 |
| AI467606 | 0,41  | 0,574398567 | 0,39  | 0,673973128 | -0,06 | 0,953282634 | -0,95 | 0,166170594 | -0,05 | 0,969937563 |
| AI480526 | 0,12  | 0,942736399 | -0,58 | 0,459231649 | 0,13  | 0,940489823 | -1,28 | 0,234882575 | -0,24 | 0,86811326  |
| AI481877 | -0,22 | 0,857999549 | 0,44  | 0,795638071 | -0,51 | 0,471873683 | 0,26  | 0,561291465 | -0,09 | 0,932268703 |
| AI504432 | 0,01  | 0,980258754 | 0,46  | 0,261025347 | 0     | 0,997268369 | 0,08  | 0,913974287 | 0,03  | 0,980961333 |
| AI506816 | -0,55 | 0,491150313 | -1,32 | 0,143349998 | -0,07 | 0,957152002 | 0,99  | 0,656261393 | -0,57 | 0,824727805 |
| AI507597 | -0,51 | 0,288338498 | -0,06 | 0,940507154 | 0,34  | 0,694294141 | -0,31 | 0,460307888 | -0,88 | 0,229389194 |

|          |       |             |       |             |       |             |       |             |       |             |
|----------|-------|-------------|-------|-------------|-------|-------------|-------|-------------|-------|-------------|
| AI593442 | 0,03  | 0,969376455 | 0,12  | 0,882589938 | -0,3  | 0,706842882 | -0,1  | 0,90213506  | 0,07  | 0,948163009 |
| AI597479 | 0     | 0,999700495 | 0,38  | 0,368735451 | 0,03  | 0,980423952 | -0,92 | 0,553357202 | -0,37 | 0,881575036 |
| AI606181 | -0,2  | 0,865776054 | -0,33 | 0,707524747 | -0,18 | 0,840187016 | 0,56  | 0,595862706 | -0,28 | 0,763240477 |
| AI606473 | 0     | 0,998210173 | 0,11  | 0,812664394 | 0,02  | 0,98439351  | 0,13  | 0,805169421 | 0,29  | 0,654732327 |
| AI607873 | 3,38  | 0,016666769 | 2,89  | 0,071348422 | -2,53 | 0,00623332  | -2,1  | 0,066910258 | 1,86  | 0,024119434 |
| AI646519 | 0,11  | 0,841086941 | -0,01 | 0,997289115 | -0,04 | 0,959437564 | -0,07 | 0,859492961 | -0,14 | 0,825311688 |
| AI661453 | 0,06  | 0,959985598 | -0,33 | 0,832194263 | 0,3   | 0,816710945 | 0,03  | 0,979829655 | -0,41 | 0,686411448 |
| AI662270 | 0,09  | 0,93786481  | 0,29  | 0,609790301 | -0,5  | 0,58160408  | -0,64 | 0,15285746  | 0,7   | 0,214069406 |
| AI837181 | -0,03 | 0,956452501 | -0,06 | 0,915282997 | -0,05 | 0,944266382 | -0,09 | 0,843512544 | -0,15 | 0,819072786 |
| AI839979 | 0,02  | 0,980833817 | 0,82  | 0,411740524 | -0,16 | 0,834017354 | -0,43 | 0,250749402 | 0,08  | 0,947437555 |
| AI846148 | -0,44 | 0,321798414 | -0,32 | 0,763005394 | 0,46  | 0,548288344 | 1,23  | 0,013215765 | 0,32  | 0,530072156 |
| AI847159 | -0,27 | 0,707480624 | 0,57  | 0,49125334  | -0,13 | 0,879127552 | -0,22 | 0,77433033  | 0,3   | 0,811321326 |
| AI854517 | 0,06  | 0,932354771 | 0,08  | 0,937345521 | -0,04 | 0,966921005 | -0,21 | 0,529965498 | 0,08  | 0,918797466 |
| AI854703 | 0,02  | 0,986382476 | -0,25 | 0,629397507 | -0,11 | 0,909233941 | 0,02  | 0,969859375 | -0,44 | 0,563077271 |
| AI987944 | 0,11  | 0,914801568 | 0,82  | 0,587897801 | 0,48  | 0,82104737  | -0,38 | 0,676010477 | 0,62  | 0,163177787 |
| Aicda    | -0,14 | 0,768809729 | -0,26 | 0,792112243 | -0,41 | 0,364663958 | 0,24  | 0,510589408 | -0,03 | 0,979152939 |
| Aida     | 0,51  | 0,398566631 | 0,48  | 0,243936374 | -0,53 | 0,370399672 | 0,6   | 0,149673996 | 1,19  | 0,025725405 |
| Aif1     | 0,26  | 0,598075174 | 0,25  | 0,661976216 | -0,27 | 0,683917899 | 0,36  | 0,368725311 | -0,07 | 0,943267656 |
| Aif1l    | -0,37 | 0,472847723 | 0,44  | 0,585443341 | 0,24  | 0,791940256 | -1,84 | 0,04686281  | -0,77 | 0,311906172 |
| Aifm1    | -0,34 | 0,764288636 | -0,69 | 0,181283332 | -0,31 | 0,735507379 | 0,78  | 0,229621542 | 0,03  | 0,982175252 |
| Aifm2    | 0,1   | 0,925315048 | 0,45  | 0,51825831  | 0,03  | 0,972847253 | -0,18 | 0,678790333 | 0,53  | 0,375162254 |
| Aifm3    | 0,11  | 0,883674476 | 0,03  | 0,990088847 | -0,05 | 0,963199274 | -0,34 | 0,61358606  | -0,19 | 0,776814504 |
| Aig1     | 1,15  | 0,049493804 | 0,82  | 0,133464285 | -0,75 | 0,154586266 | 1,04  | 0,057045858 | 0,76  | 0,198832044 |
| Aim1     | 0,83  | 0,453318919 | 0,83  | 0,499573414 | -0,2  | 0,9241587   | 0,29  | 0,780509374 | 1,68  | 0,066861241 |
| Aim1l    | 0,27  | 0,660482793 | 0,16  | 0,883093763 | 0,22  | 0,660517013 | -0,11 | 0,810172317 | 0,38  | 0,438444904 |
| Aim2     | -0,2  | 0,795890481 | 0,44  | 0,831404974 | 2,04  | 0,076620682 | 1,39  | 0,250749402 | 0,49  | 0,597174646 |
| Aimp1    | 0,07  | 0,932531737 | 0,04  | 0,965147491 | -0,08 | 0,943788892 | 0,41  | 0,408177638 | 0,33  | 0,645198541 |
| Aimp2    | 0,01  | 0,995778597 | -0,15 | 0,876406533 | 0,84  | 0,092337758 | 0,91  | 0,170353959 | 0,13  | 0,878930105 |
| Aip      | 0,02  | 0,982589459 | -0,11 | 0,806262668 | -0,15 | 0,880622107 | -0,11 | 0,854139775 | -0,14 | 0,864166878 |
| Aipl1    | 0,33  | 0,706274249 | -0,04 | 0,945920068 | -0,11 | 0,91805082  | 0,35  | 0,295827464 | 0,21  | 0,783021682 |
| Aire     | -0,12 | 0,865154688 | 0,09  | 0,912535732 | -0,07 | 0,936167504 | 0,09  | 0,891300791 | 0,32  | 0,587305934 |
| Airn     | 0,07  | 0,953269094 | -0,39 | 0,565914475 | -0,53 | 0,343594254 | 0,27  | 0,68319623  | -0,13 | 0,91314596  |
| Ajap1    | 0,1   | 0,897481914 | -0,04 | 0,97888414  | -0,1  | 0,893010661 | -0,12 | 0,726953267 | -0,26 | 0,754898455 |
| Ajuba    | -0,7  | 0,53095942  | -0,05 | 0,93867339  | 0,21  | 0,863964732 | 0,89  | 0,42636999  | -0,51 | 0,677687906 |
| AK010878 | 0,42  | 0,423395139 | 0,48  | 0,489673761 | -0,24 | 0,798838043 | -0,27 | 0,688800416 | 0,09  | 0,928764431 |

|         |       |             |       |             |       |             |       |             |       |             |
|---------|-------|-------------|-------|-------------|-------|-------------|-------|-------------|-------|-------------|
| Ak1     | -0,34 | 0,758636946 | -0,33 | 0,594415097 | -0,17 | 0,89237939  | -0,04 | 0,964972461 | -0,05 | 0,97425848  |
| Ak2     | -0,3  | 0,60715329  | -0,24 | 0,599495018 | 0,49  | 0,264885341 | 2,13  | 0,006833849 | 0,44  | 0,363914943 |
| Ak3     | -0,68 | 0,19218105  | -0,45 | 0,638366221 | 0,17  | 0,765553408 | 0,32  | 0,561182346 | -0,42 | 0,48229889  |
| Ak4     | 0,37  | 0,554057576 | 0,42  | 0,767178812 | -0,31 | 0,859517858 | 2,26  | 0,219427412 | 0,54  | 0,830813323 |
| Ak5     | -0,02 | 0,98600909  | -0,11 | 0,884370593 | 0,1   | 0,908400411 | 0,07  | 0,953429313 | -0,1  | 0,948759136 |
| Ak6     | -0,01 | 0,992774066 | -0,35 | 0,466871612 | 0,4   | 0,794567505 | 0,96  | 0,038935822 | 0,28  | 0,655912577 |
| Ak7     | 0     | 0,999147318 | -0,03 | 0,955302758 | -0,12 | 0,827761588 | 0,05  | 0,902579405 | 0,01  | 0,992980215 |
| Ak8     | 0,06  | 0,963036332 | 0,22  | 0,829325045 | -0,46 | 0,327261817 | 0,45  | 0,57887634  | 0,64  | 0,484545257 |
| Ak9     | 0,02  | 0,988414371 | 0,09  | 0,882589938 | -0,15 | 0,829543101 | -0,32 | 0,453295658 | 0,07  | 0,932268703 |
| Akap1   | -0,68 | 0,328294281 | -0,15 | 0,790350061 | 0,49  | 0,615286789 | -0,55 | 0,292135405 | 0,11  | 0,932268703 |
| Akap10  | 0,07  | 0,915348445 | -0,12 | 0,909079807 | 0,04  | 0,986800862 | 0,32  | 0,625866438 | 0,08  | 0,953297732 |
| Akap11  | -0,3  | 0,651732317 | -0,01 | 0,997167971 | 0,27  | 0,780754838 | -0,2  | 0,728155097 | 0,49  | 0,493771962 |
| Akap12  | -0,66 | 0,138092806 | -0,39 | 0,359483031 | 0,01  | 0,993680788 | 0,13  | 0,738834503 | -0,29 | 0,61906783  |
| Akap13  | 0,18  | 0,754711147 | 0,1   | 0,853388981 | -0,37 | 0,505588174 | -0,05 | 0,911258809 | -0,24 | 0,649849091 |
| Akap14  | -0,3  | 0,59648949  | -0,33 | 0,605851161 | -0,14 | 0,911205034 | 0,69  | 0,172314351 | 0,63  | 0,682929195 |
| Akap17b | -0,66 | 0,180557096 | -0,55 | 0,507567651 | 0,15  | 0,820780835 | -0,49 | 0,325137997 | 0,13  | 0,865258929 |
| Akap2   | -0,23 | 0,630905267 | 0,09  | 0,902148738 | 0,21  | 0,845986297 | 0,14  | 0,849200944 | 0,37  | 0,587305934 |
| Akap3   | 0,14  | 0,858670539 | -0,36 | 0,556926763 | -0,31 | 0,597538718 | 0,23  | 0,763366023 | 0,07  | 0,937558003 |
| Akap4   | 0,06  | 0,948087131 | 0,19  | 0,629355436 | 0,01  | 0,99407001  | 0,11  | 0,85293288  | 0,16  | 0,85508146  |
| Akap5   | 0,04  | 0,958512892 | 0,06  | 0,927073711 | -0,08 | 0,949334141 | 0,01  | 0,985517003 | -0,11 | 0,916173996 |
| Akap6   | 0,04  | 0,980048619 | -0,12 | 0,858860016 | 0,03  | 0,976042637 | -0,63 | 0,143311797 | -0,61 | 0,337492586 |
| Akap7   | -0,79 | 0,180356049 | 0,48  | 0,41640882  | 0,33  | 0,80874731  | -1,29 | 0,031845614 | -0,01 | 0,992671375 |
| Akap8   | -0,41 | 0,668945193 | -0,04 | 0,958545812 | 0,18  | 0,832791528 | -0,28 | 0,555470395 | 0,41  | 0,451070574 |
| Akap8l  | -0,19 | 0,678364564 | -0,05 | 0,935984823 | -0,23 | 0,678468552 | -0,6  | 0,141794466 | -0,04 | 0,970154126 |
| Akap9   | 0,5   | 0,192598084 | 0,39  | 0,583200444 | -0,34 | 0,490661923 | -0,06 | 0,926704232 | 0,82  | 0,122922652 |
| Akip1   | -0,07 | 0,893666478 | -0,43 | 0,745921616 | 0,26  | 0,80014996  | 0,76  | 0,494062739 | -0,08 | 0,962585122 |
| Akirin1 | -0,09 | 0,911334539 | 0,22  | 0,807175471 | -0,06 | 0,952104131 | 0,43  | 0,465446267 | 0,24  | 0,728530603 |
| Akirin2 | 0,68  | 0,261843547 | 0,28  | 0,644818618 | -0,24 | 0,809137779 | -0,02 | 0,987229847 | 0,16  | 0,911182359 |
| Akna    | -0,27 | 0,642385552 | -0,13 | 0,878240984 | 0,44  | 0,65528516  | -0,56 | 0,093488367 | 0,15  | 0,816435488 |
| Aknad1  | -0,34 | 0,541249982 | -0,33 | 0,765325717 | 0,17  | 0,797462082 | 0,17  | 0,750283421 | -0,41 | 0,518944192 |
| Aknaos  | -0,2  | 0,660482793 | -0,02 | 0,969296652 | -0,48 | 0,332905005 | -0,05 | 0,920158794 | 0,3   | 0,605694037 |
| Akp3    | 0,34  | 0,696702094 | -0,28 | 0,659928401 | 0,06  | 0,943788892 | 0,2   | 0,880094514 | -0,13 | 0,944318268 |
| Akr1a1  | 0,16  | 0,701624105 | 0,06  | 0,906234611 | 0,09  | 0,912268947 | -0,01 | 0,984966598 | -0,09 | 0,899196564 |
| Akr1b10 | 0,11  | 0,918693402 | 0,01  | 0,998513452 | 0,09  | 0,959136836 | 0,5   | 0,439173785 | 0,62  | 0,177475386 |
| Akr1b7  | -0,19 | 0,895400682 | -0,27 | 0,836049992 | 0,05  | 0,955257293 | -1,78 | 0,099114371 | -0,08 | 0,97448664  |

|          |       |             |       |             |       |             |       |             |       |             |
|----------|-------|-------------|-------|-------------|-------|-------------|-------|-------------|-------|-------------|
| Akr1b8   | -0,45 | 0,302609278 | -0,86 | 0,126231471 | 0,59  | 0,345313881 | 6,78  | 0,001139257 | -0,18 | 0,876418697 |
| Akr1c12  | 0,34  | 0,764288636 | -1,16 | 0,138101221 | 0,79  | 0,336474867 | 1,56  | 0,012175785 | 0,78  | 0,313577247 |
| Akr1c13  | -1,74 | 0,375510622 | -1,53 | 0,159045025 | 1,2   | 0,370554673 | 0,75  | 0,471235268 | 0,71  | 0,726042963 |
| Akr1c14  | 0,78  | 0,673568684 | 1,07  | 0,664765388 | -1,02 | 0,172601112 | -1,86 | 0,158665205 | 1,38  | 0,246245872 |
| Akr1c18  | 0,91  | 0,445733746 | 0,19  | 0,792112243 | -0,38 | 0,665727181 | -0,52 | 0,567607684 | 0,1   | 0,948163009 |
| Akr1c19  | 0,39  | 0,657124524 | -0,14 | 0,846045334 | 0,15  | 0,785676028 | -0,17 | 0,729857506 | 0     | 0,997116417 |
| Akr1c20  | 0,39  | 0,500870793 | -0,07 | 0,980518468 | -0,28 | 0,660517013 | 0,06  | 0,926317009 | 0,85  | 0,265692442 |
| Akr1c21  | -0,05 | 0,965703244 | -0,09 | 0,861862086 | 0,1   | 0,867580642 | -0,93 | 0,165463258 | 0,81  | 0,416134174 |
| Akr1cl   | 0,46  | 0,613764916 | -0,3  | 0,698886888 | -0,58 | 0,27041915  | -0,52 | 0,600327117 | -0,5  | 0,627973105 |
| Akr1d1   | 0,2   | 0,78851504  | 0     | 1           | 0,13  | 0,902637441 | 0,44  | 0,154588425 | 0,23  | 0,766559546 |
| Akr1e1   | -0,31 | 0,66331039  | -0,31 | 0,756778611 | 0,23  | 0,779114798 | 0,18  | 0,830691057 | -0,43 | 0,579739537 |
| Akr7a5   | -0,55 | 0,376305612 | -0,26 | 0,615311543 | 0,24  | 0,714820695 | -0,03 | 0,971338071 | -0,63 | 0,465292641 |
| Akt1     | -0,69 | 0,110762724 | -0,11 | 0,878701681 | 0,12  | 0,862480223 | 1     | 0,058393538 | 0     | 0,996733137 |
| Akt1s1   | -0,12 | 0,840446684 | -0,16 | 0,900801202 | -0,06 | 0,956810799 | 0,4   | 0,224460633 | 0,22  | 0,733488478 |
| Akt2     | 0,01  | 0,993728727 | 0,24  | 0,775914311 | 0,14  | 0,864598204 | -0,06 | 0,964393358 | 0,83  | 0,362980572 |
| Akt3     | 0,54  | 0,218614193 | 0,79  | 0,103513448 | -0,91 | 0,069580567 | 0,07  | 0,904825569 | 0,99  | 0,053873233 |
| Aktip    | -0,18 | 0,820785667 | -0,15 | 0,799971382 | 0,49  | 0,377624172 | -0,6  | 0,332865107 | -0,12 | 0,920803929 |
| Alad     | -0,3  | 0,65761852  | -0,39 | 0,725935658 | -0,26 | 0,720590502 | 0,06  | 0,947809027 | 0,06  | 0,951429597 |
| Alas1    | -0,27 | 0,589181066 | 0,6   | 0,304034247 | 0,29  | 0,789802954 | 0,33  | 0,771294754 | 0,23  | 0,868965616 |
| Alas2    | -0,26 | 0,897481914 | -0,11 | 0,970432192 | -0,54 | 0,6976409   | 0,14  | 0,885417869 | 0,16  | 0,9162287   |
| Alb      | 0,3   | 0,413043282 | -0,24 | 0,794404033 | -0,36 | 0,419537272 | 0,54  | 0,50447234  | -0,01 | 0,992406971 |
| Alcam    | 0,63  | 0,274753163 | 0,24  | 0,842663656 | 1,17  | 0,034637859 | 0,13  | 0,863504483 | 0,02  | 0,984125319 |
| Aldh16a1 | -0,31 | 0,586458491 | -0,1  | 0,86695983  | -0,14 | 0,840824939 | -0,08 | 0,831151724 | -0,09 | 0,910083563 |
| Aldh18a1 | -0,17 | 0,837953479 | 0     | 1           | 0,13  | 0,923135714 | 2,31  | 0,022522121 | 1,01  | 0,223294439 |
| Aldh1a1  | 0,49  | 0,659983324 | 0,33  | 0,747928263 | -0,74 | 0,116607178 | 0,39  | 0,529965498 | 0,15  | 0,880202418 |
| Aldh1a2  | 0,28  | 0,493929    | -0,27 | 0,493580894 | -0,08 | 0,922971065 | -0,21 | 0,87630843  | 0,31  | 0,835191    |
| Aldh1a3  | 0,44  | 0,559593618 | -0,02 | 0,991124451 | -0,19 | 0,835186359 | -0,37 | 0,525244441 | -0,9  | 0,108598701 |
| Aldh1a7  | 0,33  | 0,837846916 | 0,56  | 0,797338097 | -0,08 | 0,935887545 | -0,15 | 0,817976855 | 0,43  | 0,628728585 |
| Aldh1b1  | 0,44  | 0,296031134 | -0,18 | 0,816543137 | -0,17 | 0,823396412 | 0,2   | 0,589663381 | -0,01 | 0,993865559 |
| Aldh1l1  | 0,13  | 0,900798242 | 0,61  | 0,277253387 | -0,01 | 0,996013326 | 0,89  | 0,111880248 | 0,59  | 0,278096307 |
| Aldh1l2  | -0,04 | 0,963378584 | -0,68 | 0,424068004 | -0,09 | 0,959981309 | 1,38  | 0,116220387 | 0,84  | 0,429112259 |
| Aldh2    | -0,37 | 0,567957149 | 0,22  | 0,820806352 | 1,2   | 0,067624618 | -0,66 | 0,453588169 | -0,4  | 0,649387403 |
| Aldh3a1  | 0,19  | 0,805982344 | -0,08 | 0,956559486 | -0,26 | 0,807521381 | 0,42  | 0,45945795  | 0,36  | 0,64350521  |
| Aldh3a2  | -0,31 | 0,752886371 | -0,14 | 0,804543872 | -0,22 | 0,850171327 | -0,35 | 0,357869114 | -0,24 | 0,654732327 |
| Aldh3b1  | 0,18  | 0,735860437 | -0,17 | 0,826814267 | 0,82  | 0,572115538 | 0,41  | 0,531023057 | 0,4   | 0,602231893 |



|           |       |             |       |             |       |             |       |             |       |             |
|-----------|-------|-------------|-------|-------------|-------|-------------|-------|-------------|-------|-------------|
| Aldh3b2   | -0,28 | 0,692923111 | -0,33 | 0,6547161   | -0,28 | 0,729796531 | 0,11  | 0,80174822  | -0,08 | 0,941733247 |
| Aldh3b3   | 0,04  | 0,975949545 | 0,52  | 0,508633526 | 0,14  | 0,846176253 | -0,64 | 0,511044878 | -0,11 | 0,951236192 |
| Aldh4a1   | -0,49 | 0,364497258 | 0,06  | 0,969481475 | 0,09  | 0,953951069 | 0,32  | 0,829854055 | 0,27  | 0,880202418 |
| Aldh5a1   | -0,26 | 0,754029145 | -0,07 | 0,885546436 | -0,06 | 0,946777487 | -0,15 | 0,814830396 | -0,83 | 0,219561794 |
| Aldh6a1   | -0,42 | 0,658795779 | 0,33  | 0,699039887 | -0,3  | 0,770526999 | -1,5  | 0,038935822 | -0,34 | 0,582299997 |
| Aldh7a1   | -0,1  | 0,902628825 | -0,07 | 0,954948291 | 0,16  | 0,853753298 | -0,3  | 0,590307186 | -0,3  | 0,654016085 |
| Aldh8a1   | 0,14  | 0,846447446 | 0,06  | 0,989873399 | 0,01  | 0,99407001  | -0,36 | 0,461824013 | 0,21  | 0,752873495 |
| Aldh9a1   | -0,82 | 0,149941264 | -0,12 | 0,932292974 | 0,79  | 0,348136125 | 0,58  | 0,495507466 | -0,11 | 0,935812103 |
| Aldoart1  | -0,05 | 0,981042688 | 0,13  | 0,910184435 | 0,08  | 0,955820582 | -0,31 | 0,52857458  | -0,47 | 0,832736649 |
| Aldoart2  | -0,02 | 0,981669483 | -0,07 | 0,938233008 | -0,33 | 0,560376292 | -0,04 | 0,932252521 | 0,04  | 0,97206128  |
| Aldob     | 0,05  | 0,972736855 | 0     | 1           | -0,36 | 0,588145967 | -2,73 | 0,027443269 | 0,76  | 0,498803884 |
| Aldoc     | 0,15  | 0,892124736 | -0,07 | 0,969296652 | 1,05  | 0,224747376 | 0,26  | 0,807661309 | -0,19 | 0,864166878 |
| Alg1      | -0,35 | 0,436086286 | -0,26 | 0,65582744  | -0,18 | 0,723037215 | -0,3  | 0,560311751 | 0,03  | 0,980945466 |
| Alg10b    | -0,36 | 0,580117138 | 0,18  | 0,647475869 | 0,47  | 0,571405665 | 0,04  | 0,949166455 | -0,53 | 0,619978756 |
| Alg11     | 0,11  | 0,911662466 | -0,2  | 0,81146258  | 0,27  | 0,806102885 | 0,54  | 0,796446137 | 0,68  | 0,760042789 |
| Alg12     | -0,52 | 0,580117138 | -0,03 | 0,983071427 | -0,55 | 0,569943085 | 0,15  | 0,800156503 | 0,23  | 0,740927196 |
| Alg13     | -0,51 | 0,576879913 | -0,53 | 0,758932518 | 0,11  | 0,957152002 | 0,39  | 0,743625096 | -0,86 | 0,214056891 |
| Alg14     | 0,16  | 0,794953851 | 0,14  | 0,752537667 | 0,78  | 0,393736455 | 0,13  | 0,842365354 | 0,39  | 0,558284622 |
| Alg2      | -0,23 | 0,66331039  | -0,45 | 0,428798015 | 0,94  | 0,203549298 | 0,4   | 0,70705842  | -0,2  | 0,895756587 |
| Alg3      | -0,18 | 0,719691888 | -0,68 | 0,261075905 | 0,65  | 0,343153229 | 0,54  | 0,370819816 | -0,32 | 0,736229974 |
| Alg5      | 0,11  | 0,820023436 | -0,09 | 0,883145635 | 0,6   | 0,299010171 | -0,06 | 0,909976349 | -0,28 | 0,583279373 |
| Alg6      | -0,48 | 0,327961872 | -0,72 | 0,620803951 | 1,64  | 0,046547259 | -0,01 | 0,994761295 | -0,29 | 0,84147389  |
| Alg8      | -0,17 | 0,888652674 | -0,92 | 0,21279397  | 0,52  | 0,37686469  | 1,51  | 0,086714621 | 0,13  | 0,916602165 |
| Alg9      | 0,26  | 0,535827944 | -0,07 | 0,935329426 | 0,17  | 0,864411302 | 0,05  | 0,923775458 | 0,14  | 0,846837131 |
| Alk       | -0,24 | 0,849571502 | -0,09 | 0,917256002 | 0,5   | 0,498349888 | -0,21 | 0,647287835 | -0,1  | 0,913934839 |
| Alkbh1    | -0,31 | 0,53095942  | 0,03  | 0,986535927 | 0,4   | 0,705811313 | 0,99  | 0,215252719 | 0,04  | 0,980945466 |
| Alkbh2    | 0,24  | 0,716985606 | 0,14  | 0,853306685 | -0,35 | 0,62535327  | -0,21 | 0,522986431 | -0,03 | 0,983469081 |
| Alkbh3    | 0,14  | 0,866989155 | -0,27 | 0,521146823 | -0,12 | 0,932866273 | -0,18 | 0,712917628 | -0,06 | 0,948860137 |
| Alkbh3os1 | -0,1  | 0,850571655 | -0,13 | 0,824372931 | -0,34 | 0,559725128 | -0,27 | 0,730951567 | 0,14  | 0,917844354 |
| Alkbh4    | 0,2   | 0,793021679 | 0,15  | 0,857388191 | -0,09 | 0,940543595 | 0,31  | 0,581988484 | 0,36  | 0,513517573 |
| Alkbh5    | -0,23 | 0,576555049 | -0,06 | 0,930849936 | 0,22  | 0,743900482 | 0,02  | 0,975687196 | 0,01  | 0,993413582 |
| Alkbh6    | 0,27  | 0,66169701  | -0,54 | 0,529586111 | -0,21 | 0,718159923 | -0,33 | 0,595698174 | -0,46 | 0,583434544 |
| Alkbh7    | -0,2  | 0,832513798 | -0,1  | 0,952327737 | 0,4   | 0,737236132 | -0,48 | 0,444041732 | 0,16  | 0,840952901 |
| Alkbh8    | -0,42 | 0,59710379  | -0,42 | 0,470454944 | 0,69  | 0,425721333 | 0,45  | 0,698730957 | -0,01 | 0,992607235 |
| Allc      | 0,21  | 0,778869381 | 0,29  | 0,733191772 | 0,13  | 0,885042765 | -0,03 | 0,979535553 | 0,07  | 0,948163009 |

|           |       |             |       |             |       |             |       |             |       |             |
|-----------|-------|-------------|-------|-------------|-------|-------------|-------|-------------|-------|-------------|
| Alms1     | 0,11  | 0,928499167 | -0,21 | 0,783325809 | 1,16  | 0,264885341 | 0,78  | 0,548775366 | 0,26  | 0,887719506 |
| Alms1-ps2 | -0,28 | 0,551572626 | -0,43 | 0,790939978 | -0,32 | 0,705811313 | 0,57  | 0,373655368 | -0,02 | 0,979456872 |
| Alox12    | 1,04  | 0,172698611 | 1,49  | 0,159045025 | -0,99 | 0,288999089 | -1,96 | 0,023992865 | 1,59  | 0,016505887 |
| Alox12b   | 0,28  | 0,433492052 | 0,06  | 0,95429671  | 0,1   | 0,910160525 | 0,27  | 0,563573506 | -0,16 | 0,829380863 |
| Alox12e   | -0,31 | 0,697496197 | -0,15 | 0,833407873 | -0,08 | 0,922318683 | 0,29  | 0,447768328 | -0,15 | 0,872996382 |
| Alox15    | 0,08  | 0,935767468 | 0,97  | 0,200336704 | 0     | 0,997394645 | 0,04  | 0,932315462 | 0,34  | 0,748710615 |
| Alox5     | -0,21 | 0,754881276 | 0,16  | 0,716668427 | -0,58 | 0,566099777 | -0,31 | 0,374214073 | -0,21 | 0,735152891 |
| Alox5ap   | 0,25  | 0,63695891  | -0,55 | 0,575260771 | 0,63  | 0,618146048 | -0,83 | 0,13538661  | -0,44 | 0,721620565 |
| Alox8     | 0,01  | 0,991919022 | 0,04  | 0,93163271  | -0,26 | 0,658290431 | 0,17  | 0,681713688 | 0,4   | 0,555864261 |
| Aloxe3    | 0,77  | 0,268596151 | 0,09  | 0,950643414 | 0,18  | 0,898497659 | 0,45  | 0,331469785 | -0,16 | 0,890957032 |
| Alpi      | 0,53  | 0,666297306 | 0,16  | 0,895486883 | 0,22  | 0,665818173 | -0,19 | 0,744252152 | 0,1   | 0,947559952 |
| Alpk1     | 0,5   | 0,319031761 | 0,33  | 0,671319666 | 0,03  | 0,983471086 | -0,13 | 0,900618083 | 0,84  | 0,279515684 |
| Alpk2     | 0,15  | 0,799477555 | -0,04 | 0,962114544 | -0,32 | 0,500278506 | 0,2   | 0,676740124 | -0,16 | 0,887154982 |
| Alpk3     | 0,33  | 0,723916994 | 0,52  | 0,359483031 | -0,31 | 0,638066726 | -0,02 | 0,970771707 | 0,05  | 0,955836352 |
| Alpl      | -0,55 | 0,407591936 | 0,47  | 0,469636055 | -0,48 | 0,640464842 | -4,36 | 0,003907268 | -0,22 | 0,861056054 |
| Alppl2    | -0,04 | 0,95737766  | 0     | 0,999395995 | 0     | 0,998030531 | 0,41  | 0,561112642 | 0,32  | 0,735565325 |
| Als2      | 0,09  | 0,914447453 | 0,35  | 0,637452806 | 0,37  | 0,700558277 | 0,2   | 0,68467538  | 0,62  | 0,26978787  |
| Als2cl    | -0,42 | 0,666038024 | -0,12 | 0,824471857 | 0,32  | 0,646567565 | -1,71 | 0,006048812 | -0,15 | 0,817563348 |
| Als2cr11  | 0,01  | 0,991919022 | -0,01 | 0,99357702  | -0,43 | 0,515832206 | 0,34  | 0,500410075 | 0,27  | 0,677838252 |
| Als2cr12  | 0,12  | 0,866989155 | 0,58  | 0,59429727  | 0,12  | 0,904057901 | 0,1   | 0,881829784 | 0,57  | 0,450543672 |
| Alx1      | 0,31  | 0,546065357 | 0,08  | 0,905636829 | -0,27 | 0,770526999 | 0,03  | 0,988205241 | 0,32  | 0,849251807 |
| Alx3      | -0,35 | 0,493929    | -0,31 | 0,605851161 | -0,22 | 0,751090942 | -0,17 | 0,787569987 | -0,5  | 0,442929147 |
| Alx4      | -0,3  | 0,689966234 | 0,01  | 0,995605655 | -0,07 | 0,922318683 | -0,23 | 0,678665676 | -0,01 | 0,987261287 |
| Alyref    | -0,49 | 0,46648982  | -0,15 | 0,916255958 | 0,02  | 0,993389213 | -1,03 | 0,339095785 | 0,05  | 0,980961333 |
| Alyref2   | 0,32  | 0,449740126 | 0,28  | 0,505089058 | -0,01 | 0,995401448 | -0,41 | 0,22307663  | 0,22  | 0,677838252 |
| Amacr     | -0,49 | 0,537345693 | 0,23  | 0,753679288 | -0,16 | 0,930193129 | -0,65 | 0,357261043 | -0,24 | 0,786434393 |
| Ambn      | -0,18 | 0,719691888 | -0,15 | 0,726302218 | -0,06 | 0,957740058 | 0,23  | 0,628027498 | 0,06  | 0,95985938  |
| Ambp      | 0,26  | 0,738591386 | 0,53  | 0,353531646 | -0,29 | 0,557758269 | -0,29 | 0,649891314 | 0,6   | 0,399058218 |
| Ambra1    | 0,08  | 0,925510521 | -0,05 | 0,965090893 | -0,04 | 0,963287567 | -0,12 | 0,746580621 | -0,16 | 0,801385411 |
| Amd1      | -0,67 | 0,268855987 | -0,37 | 0,410641926 | 0,38  | 0,62535327  | 0,14  | 0,768880868 | 0,58  | 0,223717572 |
| Amd2      | -0,81 | 0,163088889 | -0,19 | 0,750273889 | 0,26  | 0,795021405 | 0,29  | 0,669653978 | 0,1   | 0,91314596  |
| Amdhd1    | -0,43 | 0,423395139 | -0,6  | 0,365968146 | -0,06 | 0,959475549 | 0,7   | 0,121231601 | 0,18  | 0,829541704 |
| Amdhd2    | 0,27  | 0,674700312 | -0,04 | 0,949201983 | 0,33  | 0,476843186 | 0,12  | 0,778212842 | 0,01  | 0,993903627 |
| Amelx     | -0,32 | 0,700094318 | 0,22  | 0,882589938 | -0,06 | 0,954453764 | 0,15  | 0,881829784 | 0,16  | 0,868167014 |
| Amer1     | 0,08  | 0,903666411 | 0,07  | 0,910193022 | 0,64  | 0,237167284 | -0,03 | 0,978782666 | -0,18 | 0,860143251 |

|          |       |             |       |             |       |             |       |             |       |             |
|----------|-------|-------------|-------|-------------|-------|-------------|-------|-------------|-------|-------------|
| Amer2    | -0,04 | 0,944291635 | 0,06  | 0,932292974 | 0,06  | 0,935887545 | 0,17  | 0,628879523 | -0,05 | 0,950308536 |
| Amer3    | 0,11  | 0,820023436 | -0,04 | 0,945374636 | -0,17 | 0,817106175 | 0,13  | 0,740192523 | 0,13  | 0,833049562 |
| Amfr     | -0,43 | 0,315801833 | -0,05 | 0,926353869 | 0,84  | 0,145630055 | 0,56  | 0,271503715 | 0,29  | 0,668706357 |
| Amh      | 0,26  | 0,6753408   | 0,4   | 0,467856397 | -0,54 | 0,285226958 | -0,13 | 0,758588473 | -0,03 | 0,969720149 |
| Amhr2    | 0,3   | 0,610509826 | 0,41  | 0,664787536 | 0,25  | 0,715403033 | -0,6  | 0,342715092 | 0,08  | 0,91314596  |
| Amica1   | -0,34 | 0,70137787  | -0,04 | 0,980518468 | 0,3   | 0,697868704 | -0,57 | 0,244334606 | -0,1  | 0,939448119 |
| Amigo1   | 0,04  | 0,957398577 | 0,35  | 0,622499716 | 0,56  | 0,370554673 | -1,31 | 0,129433069 | -0,09 | 0,951471487 |
| Amigo2   | 0,34  | 0,547547046 | 0,05  | 0,935984823 | 0,11  | 0,909963525 | -1,82 | 0,013925099 | -0,5  | 0,361463997 |
| Amigo3   | -0,22 | 0,62279387  | -0,48 | 0,297047741 | 0,48  | 0,486238146 | 0,94  | 0,069034086 | -0,25 | 0,789057162 |
| Ammecr1  | 0,06  | 0,972180409 | -0,64 | 0,489608385 | 0,77  | 0,445922881 | 2,28  | 0,05155344  | -0,48 | 0,808777689 |
| Ammecr11 | -0,79 | 0,257958071 | -0,23 | 0,539582132 | 0,2   | 0,852194581 | 0,4   | 0,296127415 | -0,79 | 0,134201411 |
| Amn      | -0,12 | 0,907726087 | -0,09 | 0,943713379 | 0     | 0,997581017 | 0,16  | 0,801091541 | 0,1   | 0,906838979 |
| Amn1     | -0,09 | 0,913546177 | 0,45  | 0,649542145 | -0,03 | 0,984879454 | -1,11 | 0,178451816 | 0,51  | 0,553137867 |
| Amot     | -0,25 | 0,823793867 | -0,17 | 0,896065393 | 0,18  | 0,831266864 | -0,27 | 0,805452009 | 0,1   | 0,942990206 |
| Amotl1   | -0,3  | 0,496123406 | -0,16 | 0,728434379 | 0,02  | 0,985148717 | -0,26 | 0,451374183 | -0,48 | 0,389664866 |
| Amotl2   | -0,19 | 0,809583841 | 0,37  | 0,444058759 | 0,25  | 0,737241227 | 0     | 0,999811182 | 0,06  | 0,943463914 |
| Ampd1    | 0,34  | 0,740095184 | 0,5   | 0,49125334  | 0,03  | 0,983471086 | 0,59  | 0,397216038 | 0,34  | 0,779912857 |
| Ampd2    | -0,7  | 0,488619512 | -0,16 | 0,727460838 | 0,44  | 0,427646555 | 0,63  | 0,367143682 | -0,13 | 0,931519966 |
| Ampd3    | -0,12 | 0,800023642 | -0,38 | 0,311099792 | 0,02  | 0,984778342 | -0,15 | 0,676581905 | -0,13 | 0,843403563 |
| Amph     | -0,06 | 0,9231839   | 0,02  | 0,989873399 | -0,4  | 0,443039118 | -0,39 | 0,555880182 | -0,45 | 0,538811506 |
| Amt      | 0,18  | 0,892882966 | -0,52 | 0,561842393 | 0,02  | 0,982736769 | -0,11 | 0,917369655 | -0,84 | 0,217512582 |
| Amtn     | -0,08 | 0,953969637 | -0,01 | 0,997700959 | 0,15  | 0,857466061 | -0,59 | 0,351120263 | -0,54 | 0,253878435 |
| Amy1     | 0,18  | 0,818135259 | 0,29  | 0,783487161 | -0,4  | 0,502179025 | -1,23 | 0,156911911 | 0,74  | 0,527807778 |
| Amy2a2   | 0,59  | 0,698231814 | -0,47 | 0,536486337 | 0,25  | 0,813287877 | 0,38  | 0,298756888 | 0,1   | 0,917710291 |
| Amy2b    | -0,11 | 0,867664049 | 0,51  | 0,641804702 | -0,29 | 0,716743339 | -0,28 | 0,686514009 | -0,07 | 0,948117662 |
| Amz1     | -0,04 | 0,948926586 | 0,11  | 0,845663274 | 0,3   | 0,72066129  | 0,1   | 0,789846024 | 0,29  | 0,669149621 |
| Amz2     | 0,35  | 0,316599006 | 0,22  | 0,682827437 | -0,54 | 0,543291636 | 0,25  | 0,750588436 | -0,24 | 0,837447794 |
| Anapc1   | -0,27 | 0,559636965 | -0,15 | 0,776563849 | 0,4   | 0,539159914 | 0,38  | 0,336206487 | -0,09 | 0,918529364 |
| Anapc10  | 0,26  | 0,778869381 | -0,07 | 0,936792848 | -0,26 | 0,724675525 | -0,03 | 0,987138922 | 0,26  | 0,823098095 |
| Anapc11  | -0,26 | 0,630558551 | -0,18 | 0,674643073 | 0,25  | 0,589451508 | -0,04 | 0,962670023 | -0,39 | 0,573562455 |
| Anapc13  | 0,11  | 0,840552045 | -0,07 | 0,900801202 | 0,06  | 0,939468746 | -0,3  | 0,352086999 | -0,33 | 0,568291477 |
| Anapc15  | -0,53 | 0,717407143 | -0,22 | 0,903748773 | -0,31 | 0,712697139 | -0,38 | 0,800853287 | 0,39  | 0,752900829 |
| Anapc16  | -0,12 | 0,857233165 | -0,1  | 0,821387717 | 0,56  | 0,555425727 | 0,24  | 0,5360377   | -0,12 | 0,872440961 |
| Anapc2   | -0,52 | 0,430696208 | -0,44 | 0,46932439  | 0,05  | 0,964509282 | 0,56  | 0,36373875  | -0,02 | 0,984632256 |
| Anapc4   | -0,61 | 0,305407475 | -0,17 | 0,717942902 | 0,73  | 0,179552168 | 0,38  | 0,206297098 | -0,26 | 0,651690564 |

|         |       |             |       |             |       |             |       |             |       |             |
|---------|-------|-------------|-------|-------------|-------|-------------|-------|-------------|-------|-------------|
| Anapc5  | -0,55 | 0,154393404 | -0,4  | 0,350749298 | 0,8   | 0,164756979 | 0,22  | 0,509774032 | -0,25 | 0,622484124 |
| Anapc7  | -0,44 | 0,399567294 | -0,21 | 0,756998297 | 0,5   | 0,375756922 | 0,59  | 0,446844848 | -0,05 | 0,976743304 |
| Ang     | 0,13  | 0,840515514 | -0,26 | 0,882847123 | 0,44  | 0,876229428 | 0,93  | 0,56514466  | 0,86  | 0,623214829 |
| Ang2    | -0,02 | 0,970078059 | 0,09  | 0,883145635 | 0,01  | 0,986795152 | -0,17 | 0,68648892  | 0,07  | 0,933307994 |
| Ang4    | -0,19 | 0,785400637 | 0,11  | 0,810146573 | 0,07  | 0,939681612 | -0,14 | 0,879866481 | 0,43  | 0,517887746 |
| Ang5    | 0,07  | 0,892124736 | 0,04  | 0,960358892 | 0,04  | 0,961125841 | 0,17  | 0,667619249 | 0,18  | 0,738412365 |
| Ang6    | -0,37 | 0,482077988 | 0,08  | 0,946599376 | 0,12  | 0,880702563 | 0,18  | 0,782526829 | 0,47  | 0,408409206 |
| Angel1  | -0,11 | 0,909885273 | -0,32 | 0,54867175  | -0,29 | 0,74860644  | 0,79  | 0,314856134 | -0,88 | 0,237975091 |
| Angel2  | -0,12 | 0,891774463 | -0,09 | 0,920580358 | -0,18 | 0,867543859 | -0,02 | 0,982744094 | 0,21  | 0,809710619 |
| Angpt1  | 0,68  | 0,421957622 | 0,43  | 0,802616913 | 0,14  | 0,903366838 | -3    | 0,017698482 | 0,04  | 0,984125319 |
| Angpt2  | 0,04  | 0,970134229 | 0,05  | 0,924342001 | -0,16 | 0,867571963 | 2,35  | 0,009344805 | 0,7   | 0,222541675 |
| Angpt4  | -0,13 | 0,883923631 | -0,02 | 0,994137877 | -0,29 | 0,542870329 | -0,07 | 0,899335603 | 0,32  | 0,742982183 |
| Angptl1 | 0,08  | 0,910211895 | 0,2   | 0,817367084 | -0,3  | 0,530318769 | -0,31 | 0,741769627 | -0,42 | 0,679072594 |
| Angptl2 | -0,24 | 0,888366049 | 0,13  | 0,918694468 | 0,43  | 0,532446034 | -0,6  | 0,300673159 | -1,28 | 0,031308457 |
| Angptl3 | -0,01 | 0,994104887 | -0,23 | 0,563746321 | -0,3  | 0,604802745 | 0,14  | 0,805239179 | -0,08 | 0,929780699 |
| Angptl4 | -0,2  | 0,851515432 | -0,47 | 0,363298292 | -0,18 | 0,868525712 | 3,56  | 0,00219426  | -0,99 | 0,102946429 |
| Angptl6 | 0     | 0,998769353 | 0,77  | 0,448796542 | -0,33 | 0,798320169 | -0,55 | 0,212124969 | 0,03  | 0,979392852 |
| Angptl7 | -0,09 | 0,898269435 | 0,34  | 0,572692182 | -0,21 | 0,744387748 | -0,01 | 0,997129538 | -0,5  | 0,545532754 |
| Angptl8 | 0,02  | 0,965116762 | -0,07 | 0,876459111 | -0,29 | 0,541560473 | -0,05 | 0,898801714 | 0,01  | 0,993903627 |
| Ank     | -0,3  | 0,664036618 | -0,69 | 0,256702217 | 0     | 0,999796402 | -0,17 | 0,788480681 | 0,04  | 0,979456872 |
| Ank1    | 0     | 0,996998625 | -0,35 | 0,454679117 | 0,36  | 0,647988621 | 0,19  | 0,740997825 | -0,35 | 0,654872635 |
| Ank2    | -0,15 | 0,897757972 | 0,14  | 0,817593898 | -0,54 | 0,454508443 | -0,07 | 0,887824091 | -0,38 | 0,464952461 |
| Ank3    | -0,43 | 0,423859346 | 0,28  | 0,686776838 | -0,42 | 0,595014792 | -0,97 | 0,27494172  | -0,62 | 0,498803884 |
| Ankar   | 0,24  | 0,771117787 | 0,2   | 0,890945229 | -0,56 | 0,359711139 | 0,27  | 0,654230107 | 0,16  | 0,819072786 |
| Ankdd1a | 0,56  | 0,264937591 | 0,46  | 0,495742596 | 0,36  | 0,659973133 | -0,06 | 0,929604905 | -0,01 | 0,9939542   |
| Ankdd1b | 0,15  | 0,810208393 | -0,56 | 0,501521671 | 0,4   | 0,393592213 | -0,36 | 0,80341881  | -0,28 | 0,859801406 |
| Ankef1  | -0,61 | 0,421957622 | 0,51  | 0,664787536 | 0,08  | 0,959621074 | -0,03 | 0,970534463 | -0,07 | 0,939448119 |
| Ankfn1  | 0     | 0,999288019 | 0,34  | 0,578409465 | -0,27 | 0,722775581 | -0,36 | 0,651601597 | 0,1   | 0,943772196 |
| Ankfy1  | -0,49 | 0,397054492 | -0,16 | 0,846624873 | 0,22  | 0,716352322 | 0,45  | 0,437773588 | 0,78  | 0,186064144 |
| Ankhd1  | 0,03  | 0,967892992 | 0,01  | 0,994802028 | 0,04  | 0,977827235 | -0,6  | 0,28755453  | 0,02  | 0,984675109 |
| Ankib1  | -0,15 | 0,892195063 | -0,05 | 0,955055373 | 0,07  | 0,943144399 | 0,65  | 0,12167813  | 0,03  | 0,97206128  |
| Ankk1   | -0,17 | 0,800959144 | -0,11 | 0,946885634 | 0,1   | 0,943788892 | -0,21 | 0,638528838 | -0,08 | 0,933011676 |
| Ankle1  | 0,48  | 0,54401985  | -0,66 | 0,325242663 | 0,17  | 0,830541787 | 0,7   | 0,149197029 | 0,27  | 0,671838073 |
| Ankle2  | -0,28 | 0,61964213  | -0,28 | 0,664765388 | 0,24  | 0,750624323 | -0,44 | 0,307744759 | -0,52 | 0,277185147 |
| Ankmy1  | 0,32  | 0,559521725 | 0,28  | 0,782652703 | -0,16 | 0,814956693 | -0,63 | 0,206310992 | -0,08 | 0,944318268 |

|          |       |             |       |             |       |             |       |             |       |             |
|----------|-------|-------------|-------|-------------|-------|-------------|-------|-------------|-------|-------------|
| Ankmy2   | -0,49 | 0,316599006 | -0,52 | 0,644818618 | 0,3   | 0,560191012 | -0,21 | 0,863483464 | -0,21 | 0,860058375 |
| Ankra2   | -0,13 | 0,892823025 | 0,29  | 0,670859269 | 0,38  | 0,556704323 | -0,3  | 0,478731976 | -0,21 | 0,814049306 |
| Ankrd1   | -0,38 | 0,685826767 | 0,13  | 0,850048209 | 1,17  | 0,210696948 | 0,55  | 0,151396301 | 0,16  | 0,825272094 |
| Ankrd10  | 0,08  | 0,910211895 | 0,36  | 0,602549494 | 0,14  | 0,869749258 | 0,49  | 0,430289476 | 0,13  | 0,91597137  |
| Ankrd11  | 0,05  | 0,949362206 | -0,17 | 0,765325717 | -0,03 | 0,969476711 | 0,15  | 0,73014748  | -0,19 | 0,777437869 |
| Ankrd12  | 0,04  | 0,973545171 | 0,39  | 0,666450149 | 0,52  | 0,509702247 | -1,41 | 0,057868203 | 0,73  | 0,246316824 |
| Ankrd13a | -0,64 | 0,263040496 | -0,57 | 0,35496087  | 0,14  | 0,826849099 | 0,16  | 0,683901621 | -0,48 | 0,423787085 |
| Ankrd13b | -0,12 | 0,849354728 | 0,05  | 0,943436096 | 0,12  | 0,897383719 | 0,41  | 0,436661219 | 0,04  | 0,977775233 |
| Ankrd13c | -0,13 | 0,887555241 | 0,14  | 0,818613446 | -0,08 | 0,9241587   | 0,25  | 0,55864576  | 0,02  | 0,981677577 |
| Ankrd13d | -0,04 | 0,959985598 | 0,24  | 0,788759447 | 0,2   | 0,782988471 | -0,93 | 0,186368589 | -0,33 | 0,713289272 |
| Ankrd16  | 0,2   | 0,855421712 | -0,55 | 0,593605226 | -0,12 | 0,911560317 | -0,4  | 0,532951388 | -0,66 | 0,345202025 |
| Ankrd17  | 0,26  | 0,548321322 | 0,42  | 0,322591012 | -0,08 | 0,932866273 | 0,19  | 0,604127556 | 0,44  | 0,375162254 |
| Ankrd2   | 0,26  | 0,765643907 | -0,48 | 0,748345069 | 0,26  | 0,665914215 | 0,16  | 0,873610553 | -0,27 | 0,765419939 |
| Ankrd22  | 0,44  | 0,575127945 | 0,24  | 0,638366221 | 0,23  | 0,82622365  | -0,04 | 0,962167676 | 0,4   | 0,638619485 |
| Ankrd23  | -0,01 | 0,997842309 | 0,16  | 0,852563873 | -0,45 | 0,750624323 | -0,64 | 0,149673996 | -0,89 | 0,235574745 |
| Ankrd24  | 0,26  | 0,682574629 | -0,41 | 0,377007015 | -0,5  | 0,359756591 | 0,46  | 0,262386327 | -0,01 | 0,991628025 |
| Ankrd26  | -0,03 | 0,98456417  | 0,05  | 0,971464245 | 0,58  | 0,462123525 | -0,03 | 0,982450636 | 0,59  | 0,520240481 |
| Ankrd27  | -0,47 | 0,414026998 | -0,07 | 0,927776381 | 0,34  | 0,602775092 | 0,1   | 0,854188679 | -0,48 | 0,428613647 |
| Ankrd28  | -0,23 | 0,682425445 | -0,42 | 0,565215819 | 0,79  | 0,203549298 | 0,54  | 0,351434419 | 0,1   | 0,928764431 |
| Ankrd29  | -1,02 | 0,2345878   | -0,97 | 0,271257402 | -0,17 | 0,925248877 | -1,34 | 0,106958367 | -0,29 | 0,673577848 |
| Ankrd33  | 0,15  | 0,760032001 | 0,21  | 0,792112243 | -0,15 | 0,785676028 | -0,23 | 0,813912487 | 0,05  | 0,970815167 |
| Ankrd33b | 0,46  | 0,45143667  | -0,19 | 0,671319666 | -0,23 | 0,878636183 | -0,14 | 0,758688054 | 0,53  | 0,313571933 |
| Ankrd34a | 0,26  | 0,615064142 | 0,16  | 0,829892665 | -0,01 | 0,993379272 | 0,13  | 0,781249605 | -0,16 | 0,866966085 |
| Ankrd34b | 0,08  | 0,938708479 | 0,27  | 0,820851855 | -0,15 | 0,840836808 | -0,25 | 0,608644901 | 0,27  | 0,758160723 |
| Ankrd34c | -0,08 | 0,89546421  | -0,28 | 0,567985291 | -0,52 | 0,475629395 | 0,19  | 0,567607684 | 0,38  | 0,446071089 |
| Ankrd35  | 0,48  | 0,328445973 | 0,01  | 0,999438768 | -0,75 | 0,280958182 | -0,44 | 0,466099396 | -0,22 | 0,844265172 |
| Ankrd36  | -0,02 | 0,976574175 | 0,4   | 0,747707816 | -0,4  | 0,555425727 | -0,45 | 0,560707084 | 0,03  | 0,982779069 |
| Ankrd37  | 0,04  | 0,95538722  | 0,3   | 0,815959578 | 0,29  | 0,794830621 | 2,29  | 0,057215016 | -0,38 | 0,844428433 |
| Ankrd39  | -0,46 | 0,611339325 | 0,24  | 0,641094649 | -0,01 | 0,997123949 | 0,26  | 0,468562522 | 0,27  | 0,720844381 |
| Ankrd40  | -0,26 | 0,640236418 | 0,21  | 0,600432986 | 0,26  | 0,703647945 | -0,29 | 0,465045754 | -0,04 | 0,974110019 |
| Ankrd42  | 0,62  | 0,378428594 | -0,35 | 0,811472247 | 0,02  | 0,977126842 | 0,43  | 0,571484457 | 0,03  | 0,980306863 |
| Ankrd44  | -0,36 | 0,79498488  | -0,29 | 0,748874675 | 0,26  | 0,797779047 | -2,08 | 0,033579739 | -0,68 | 0,34046371  |
| Ankrd45  | -0,03 | 0,964076631 | 0,25  | 0,781046971 | 0,05  | 0,967304745 | -0,11 | 0,854613369 | 0,04  | 0,97425848  |
| Ankrd46  | -0,23 | 0,762798673 | -0,23 | 0,599437663 | 0,1   | 0,911894304 | -0,02 | 0,992906132 | -0,27 | 0,86437594  |
| Ankrd49  | -0,19 | 0,852363306 | -0,47 | 0,547143296 | 0,18  | 0,861837147 | 0,13  | 0,800853287 | 0,55  | 0,297671786 |

|         |       |             |       |             |       |             |       |             |       |             |
|---------|-------|-------------|-------|-------------|-------|-------------|-------|-------------|-------|-------------|
| Ankrd50 | -0,29 | 0,549420541 | -0,08 | 0,909329669 | -0,17 | 0,770315793 | 0,37  | 0,484129767 | -0,13 | 0,882103239 |
| Ankrd52 | -0,71 | 0,259797168 | -0,56 | 0,406273247 | 0,63  | 0,421026326 | 1,12  | 0,041009258 | -0,45 | 0,604611676 |
| Ankrd53 | 0,11  | 0,839881823 | -0,07 | 0,953419196 | -0,24 | 0,660920525 | -0,25 | 0,759281029 | -0,4  | 0,530072156 |
| Ankrd54 | 0,08  | 0,920050311 | -0,64 | 0,638366221 | -0,45 | 0,602259493 | -0,6  | 0,401001462 | -0,5  | 0,682929195 |
| Ankrd55 | 0,39  | 0,541397536 | 0,05  | 0,975103597 | 0,16  | 0,888677583 | 0,43  | 0,515908704 | 0,13  | 0,914218722 |
| Ankrd6  | 0,02  | 0,987884793 | -0,75 | 0,420739829 | 0,06  | 0,969992596 | -0,36 | 0,501683233 | -0,32 | 0,708533352 |
| Ankrd60 | -0,64 | 0,238657627 | -0,47 | 0,394443755 | -0,24 | 0,761207281 | -0,01 | 0,997129538 | 0,18  | 0,86811326  |
| Ankrd61 | 0,18  | 0,85053963  | -0,01 | 0,996341424 | 0,19  | 0,904573436 | -0,22 | 0,658373543 | 0,02  | 0,984675109 |
| Ankrd63 | 0,45  | 0,464085315 | 0,04  | 0,965147491 | -0,29 | 0,543309542 | -0,34 | 0,308181516 | -0,29 | 0,663851605 |
| Ankrd65 | 0,35  | 0,538001428 | -0,07 | 0,929289366 | -0,33 | 0,660517013 | -0,05 | 0,953228555 | 0,03  | 0,983886537 |
| Ankrd66 | 0,15  | 0,786831697 | 0,04  | 0,958621018 | -0,2  | 0,715547198 | -0,23 | 0,770622324 | -0,03 | 0,976743304 |
| Ankrd7  | -0,02 | 0,973883276 | 0,11  | 0,934602811 | 0,18  | 0,751758339 | -0,05 | 0,947477693 | -0,09 | 0,913274952 |
| Ankrd9  | -0,43 | 0,539226089 | -0,04 | 0,966717367 | 0,51  | 0,588145967 | 0,02  | 0,979516321 | -0,96 | 0,385851299 |
| Anks1   | 0,09  | 0,933912196 | -0,45 | 0,348856843 | 0,18  | 0,847688308 | 0,18  | 0,768373748 | -0,05 | 0,958259949 |
| Anks1b  | -0,12 | 0,881663401 | -0,39 | 0,446315327 | -0,03 | 0,976042637 | -0,19 | 0,732480354 | 0,93  | 0,375162254 |
| Anks3   | -0,1  | 0,928103232 | 0,01  | 0,996105203 | -0,5  | 0,390133092 | -0,48 | 0,128119399 | -0,16 | 0,876719251 |
| Anks4b  | 0,15  | 0,802311542 | 0,06  | 0,937424389 | -0,33 | 0,584107565 | -0,19 | 0,566165959 | 0,01  | 0,99004065  |
| Anks6   | -0,09 | 0,907222447 | -0,34 | 0,688585656 | 0,08  | 0,940335002 | 0,19  | 0,703803198 | -0,11 | 0,914903084 |
| Ankub1  | -0,24 | 0,69656531  | 0,09  | 0,938991098 | 0,3   | 0,6021281   | 0,23  | 0,699435233 | 0     | 0,998184923 |
| Ankzf1  | -0,14 | 0,836158068 | 0,34  | 0,672509572 | 0,5   | 0,420043356 | -0,74 | 0,191596155 | -0,27 | 0,723883531 |
| Anln    | -1,21 | 0,082959998 | -1,78 | 0,100428178 | 1,98  | 0,043040739 | 3,46  | 0,008249806 | 0,22  | 0,799638391 |
| Ano1    | -0,13 | 0,907407857 | 0,43  | 0,821227978 | 0,69  | 0,324602896 | -2,1  | 0,048145525 | -1,39 | 0,095653625 |
| Ano10   | 0,08  | 0,895871179 | 0,03  | 0,981630855 | -0,01 | 0,99394877  | -0,08 | 0,841739069 | -0,2  | 0,752420653 |
| Ano2    | 0,06  | 0,964272364 | -0,24 | 0,90164068  | -0,21 | 0,830336321 | -0,23 | 0,529426866 | 0,33  | 0,646441901 |
| Ano3    | -0,2  | 0,738714467 | 0,06  | 0,958974534 | 0,16  | 0,78228281  | -0,37 | 0,672331878 | -0,2  | 0,882728747 |
| Ano4    | 0,2   | 0,701086418 | 0,34  | 0,701492683 | -0,15 | 0,838242917 | -0,51 | 0,224533543 | -0,26 | 0,66855342  |
| Ano5    | 0,04  | 0,959878618 | 0,17  | 0,845231127 | -0,25 | 0,675674731 | 0,16  | 0,823146103 | 0,32  | 0,638113984 |
| Ano6    | -0,22 | 0,615259942 | -0,01 | 0,990105879 | 0,27  | 0,628048897 | -0,44 | 0,191243536 | 0,01  | 0,990091016 |
| Ano7    | 0,52  | 0,537473384 | -0,41 | 0,593351321 | -0,01 | 0,993071391 | 0,08  | 0,8914104   | -0,12 | 0,894623317 |
| Ano8    | -0,42 | 0,500794842 | 0,68  | 0,23919586  | 0,4   | 0,599127793 | 0,27  | 0,547903259 | -0,15 | 0,820657685 |
| Ano9    | 0,52  | 0,407175373 | 0,07  | 0,9554581   | 0,26  | 0,736837174 | 0,02  | 0,990388217 | -0,12 | 0,952718905 |
| Anp32a  | -0,66 | 0,15490509  | -0,46 | 0,448431001 | 0,16  | 0,846176253 | 0,36  | 0,25487338  | -0,07 | 0,947437555 |
| Anp32b  | -0,14 | 0,738714467 | -0,24 | 0,611052267 | 0,19  | 0,709317317 | 0,49  | 0,17421446  | 0,06  | 0,933827144 |
| Anp32e  | -0,28 | 0,762798673 | -0,46 | 0,587634717 | 0,22  | 0,756336225 | 0,39  | 0,744107161 | 0,13  | 0,947559952 |
| Anpep   | -0,14 | 0,907844906 | -0,84 | 0,453958512 | 0,18  | 0,743185545 | -1,08 | 0,057946059 | -1,37 | 0,13519802  |

|        |       |             |       |             |       |             |       |             |       |             |
|--------|-------|-------------|-------|-------------|-------|-------------|-------|-------------|-------|-------------|
| Antxr1 | 0,64  | 0,175830295 | 0,18  | 0,857503073 | 0,01  | 0,990836784 | 1,14  | 0,168862238 | -0,61 | 0,587305934 |
| Antxr2 | 0,47  | 0,517149278 | 0,89  | 0,38136997  | 0,57  | 0,62463782  | 2,15  | 0,132339591 | -1,8  | 0,235574745 |
| Antxrl | 0,07  | 0,91743747  | -0,16 | 0,728434379 | -0,23 | 0,777810365 | 0,31  | 0,369310497 | 0,18  | 0,776251218 |
| Anxa1  | -0,02 | 0,968252417 | -0,37 | 0,596930496 | 0,59  | 0,326707568 | 1,05  | 0,086452922 | 0,45  | 0,493920965 |
| Anxa10 | -0,27 | 0,600800451 | 0,16  | 0,782652703 | 0,04  | 0,964509282 | 0,3   | 0,730493593 | 0,4   | 0,698795718 |
| Anxa11 | -0,55 | 0,32228759  | -0,57 | 0,420239705 | 0,74  | 0,57242912  | 0,52  | 0,336611912 | -0,36 | 0,712786855 |
| Anxa13 | -0,08 | 0,911392142 | 0,38  | 0,318079221 | 0,35  | 0,712697139 | -0,07 | 0,913112922 | -0,1  | 0,928724353 |
| Anxa2  | -0,15 | 0,736503749 | -0,43 | 0,302028989 | 0,35  | 0,504430384 | 0,68  | 0,11232717  | -0,18 | 0,85508146  |
| Anxa3  | -0,19 | 0,687662951 | 0,08  | 0,887873798 | 0,19  | 0,829099961 | 0,19  | 0,599459623 | 0,08  | 0,918797466 |
| Anxa4  | 0,85  | 0,063885139 | 0,49  | 0,326075089 | -0,03 | 0,978840171 | 0,44  | 0,172485486 | 0,85  | 0,168781914 |
| Anxa5  | -0,31 | 0,416909288 | 0     | 1           | 0,48  | 0,332905005 | 0,37  | 0,244769083 | 0,12  | 0,864166878 |
| Anxa6  | -1,17 | 0,148685247 | -0,66 | 0,235116318 | 0,92  | 0,064246958 | 0,72  | 0,267639393 | -0,36 | 0,639345637 |
| Anxa7  | 0,04  | 0,958535933 | -0,14 | 0,895974641 | -0,22 | 0,698170879 | 0,3   | 0,425733622 | 0,79  | 0,083660756 |
| Anxa8  | -0,07 | 0,961223504 | 0,11  | 0,861862086 | 1,78  | 0,047971461 | 0,44  | 0,418317818 | 0,52  | 0,420215404 |
| Anxa9  | 0,25  | 0,766990396 | 0,04  | 0,974640063 | 0,35  | 0,683305382 | 0,36  | 0,604842873 | -0,46 | 0,699060093 |
| Aoah   | -0,01 | 0,990894139 | -0,34 | 0,810875398 | -0,83 | 0,289606812 | -0,09 | 0,93219157  | -0,55 | 0,493920965 |
| Aoc1   | -0,17 | 0,839375532 | -0,27 | 0,804659186 | -0,34 | 0,600349331 | -0,21 | 0,5925472   | -0,26 | 0,669233648 |
| Aoc2   | 0,26  | 0,703034582 | 0,08  | 0,945143056 | 0,45  | 0,493193538 | 0,53  | 0,366105968 | -0,37 | 0,697757911 |
| Aoc3   | -0,35 | 0,720829271 | -0,06 | 0,986782918 | 0,45  | 0,720069267 | -0,49 | 0,651440131 | -1,07 | 0,218199508 |
| Aox1   | -0,6  | 0,290080288 | -0,42 | 0,519915586 | 0,11  | 0,911506558 | 0,65  | 0,111146959 | -0,53 | 0,251771039 |
| Aox2   | -0,07 | 0,931976704 | 0,17  | 0,861862086 | -0,4  | 0,498419585 | 0,02  | 0,986768223 | 0,21  | 0,794586838 |
| Aox3   | 0,54  | 0,487185115 | -0,24 | 0,622161495 | 0,04  | 0,978012085 | -0,12 | 0,810508503 | -0,08 | 0,938932704 |
| Aox4   | -0,26 | 0,648730873 | 0,37  | 0,495742596 | -0,41 | 0,436382905 | -0,41 | 0,392579767 | 0,13  | 0,911850421 |
| Ap1ar  | 0,24  | 0,786831697 | 1,01  | 0,45420995  | 0,05  | 0,950862176 | -0,41 | 0,619134782 | 0,47  | 0,423787085 |
| Ap1b1  | -0,3  | 0,640236418 | -0,05 | 0,942410245 | 0,48  | 0,437315481 | 0,43  | 0,343134297 | -0,01 | 0,991418175 |
| Ap1g1  | -0,12 | 0,792743726 | 0,08  | 0,897645724 | 0,29  | 0,628048897 | 0,08  | 0,864335447 | 0,17  | 0,811290509 |
| Ap1g2  | -0,68 | 0,380066167 | -0,09 | 0,933320126 | 0,34  | 0,661089127 | -0,42 | 0,581932021 | 0,09  | 0,955897803 |
| Ap1m1  | -0,16 | 0,730258012 | -0,09 | 0,899496232 | -0,01 | 0,995401448 | -0,41 | 0,351012911 | -0,34 | 0,511300791 |
| Ap1m2  | 0,15  | 0,742958309 | 0,26  | 0,812459283 | -0,05 | 0,950278774 | -0,11 | 0,873610553 | 0,44  | 0,419557334 |
| Ap1s1  | -0,2  | 0,69656531  | -0,67 | 0,200128522 | 0,74  | 0,120754101 | 1,28  | 0,085510162 | 0,06  | 0,954657649 |
| Ap1s2  | -0,08 | 0,941762472 | -0,62 | 0,464689086 | 0,23  | 0,72066129  | 1,38  | 0,126608574 | 0,09  | 0,949751787 |
| Ap1s3  | -0,33 | 0,622175371 | -0,07 | 0,943915456 | 0,25  | 0,841464759 | -0,37 | 0,816899875 | -0,6  | 0,68601056  |
| Ap2a1  | -0,5  | 0,321600657 | -0,19 | 0,787758076 | 0,46  | 0,535940975 | 0,94  | 0,123325952 | -0,06 | 0,960974478 |
| Ap2a2  | -0,34 | 0,533055802 | -0,6  | 0,200674509 | 0,84  | 0,249821562 | 0,16  | 0,696542281 | -0,36 | 0,447760429 |
| Ap2b1  | -0,25 | 0,515830448 | -0,13 | 0,758276181 | 0,07  | 0,913132002 | 0,01  | 0,986427508 | -0,25 | 0,601077802 |

|         |       |             |       |             |       |             |       |             |       |             |
|---------|-------|-------------|-------|-------------|-------|-------------|-------|-------------|-------|-------------|
| Ap2m1   | -0,32 | 0,468767852 | -0,18 | 0,68442935  | 0,15  | 0,805083999 | 0,5   | 0,296643088 | -0,26 | 0,697336851 |
| Ap2s1   | -0,14 | 0,739263859 | -0,34 | 0,461889809 | 0,56  | 0,191706163 | 1,35  | 0,015885055 | -0,1  | 0,885389289 |
| Ap3b1   | -0,39 | 0,627433534 | -0,02 | 0,994666786 | 0,08  | 0,906709737 | 0,49  | 0,418317818 | 0     | 0,99981982  |
| Ap3b2   | -0,58 | 0,270547821 | 0,16  | 0,927073711 | -0,27 | 0,748973263 | -0,39 | 0,341092706 | 0,17  | 0,823098095 |
| Ap3d1   | -0,13 | 0,784951771 | 0,22  | 0,664787536 | 0,07  | 0,932706021 | -0,09 | 0,887977289 | -0,06 | 0,94758725  |
| Ap3m1   | -0,17 | 0,754092173 | -0,57 | 0,583200444 | 0,06  | 0,96043738  | 0,07  | 0,903152864 | 0,04  | 0,962820357 |
| Ap3m2   | -0,1  | 0,890974575 | 0,64  | 0,485749642 | 0,25  | 0,808847447 | -0,45 | 0,302947477 | 0,31  | 0,650806881 |
| Ap3s1   | 0,22  | 0,729108809 | 0     | 1           | -0,31 | 0,748973263 | 0,73  | 0,244334606 | 0,06  | 0,95985938  |
| Ap3s2   | -0,24 | 0,678857468 | -0,01 | 0,994376785 | 0,54  | 0,76370647  | -0,36 | 0,654309147 | -0,82 | 0,342250812 |
| Ap4b1   | 0,4   | 0,540504193 | 0,14  | 0,753858951 | 0,96  | 0,326707568 | 0,24  | 0,556403549 | 0,28  | 0,643370567 |
| Ap4e1   | -0,03 | 0,973545171 | 0,31  | 0,472042875 | 0,27  | 0,7674045   | 0,43  | 0,437576429 | 0,68  | 0,46173543  |
| Ap4m1   | -0,8  | 0,508328254 | -0,2  | 0,88928164  | 0,54  | 0,483761569 | 0,12  | 0,887045509 | -0,68 | 0,203117576 |
| Ap4s1   | -0,52 | 0,305623485 | 0,17  | 0,781665479 | 0,12  | 0,894339966 | -0,58 | 0,106889752 | 0,32  | 0,606740281 |
| Ap5b1   | 0,48  | 0,440729347 | 0,04  | 0,965796793 | -0,18 | 0,798838043 | -0,15 | 0,846491238 | 0     | 0,998444219 |
| Ap5m1   | -0,41 | 0,349376114 | 0,15  | 0,882730533 | 0,81  | 0,448209774 | -0,38 | 0,665208114 | 0,06  | 0,969239137 |
| Ap5s1   | 0,01  | 0,995788785 | 0,1   | 0,855187815 | 0,04  | 0,976098568 | -0,15 | 0,907662772 | -0,29 | 0,854135221 |
| Ap5z1   | -0,46 | 0,520667704 | 0,21  | 0,664710351 | -0,07 | 0,911634383 | -0,52 | 0,18955159  | -0,24 | 0,673145862 |
| Apaf1   | 0,07  | 0,937415031 | 0,58  | 0,439108392 | -0,05 | 0,956894731 | 0,65  | 0,18074023  | 0,67  | 0,197214574 |
| Apba1   | -0,51 | 0,346475096 | -0,05 | 0,980125137 | -0,02 | 0,984778342 | -1,49 | 0,110182152 | -0,27 | 0,840952901 |
| Apba2   | 0,28  | 0,751456663 | 0,38  | 0,66120517  | -0,35 | 0,667037569 | -0,4  | 0,490176405 | 0,27  | 0,72670171  |
| Apba3   | 0,34  | 0,538001428 | 0,52  | 0,375222297 | -0,24 | 0,832387201 | -0,07 | 0,928203787 | 0,11  | 0,909363599 |
| Apbb1   | -0,15 | 0,722415783 | 0,16  | 0,742730285 | 0     | 0,998479656 | -0,91 | 0,058564376 | -0,59 | 0,231974094 |
| Apbb1ip | -0,45 | 0,422033372 | 0,19  | 0,841470552 | 0,14  | 0,9122363   | 0,38  | 0,758772982 | -0,43 | 0,750359224 |
| Apbb2   | -0,27 | 0,507090099 | -0,13 | 0,812664394 | 0,07  | 0,938771378 | 0,12  | 0,763690382 | -0,47 | 0,349150128 |
| Apbb3   | -0,07 | 0,957427783 | -0,08 | 0,891749049 | 0,45  | 0,66170364  | -0,46 | 0,530723335 | -0,26 | 0,859050817 |
| Apc     | -0,65 | 0,219672614 | -0,03 | 0,989873399 | -0,7  | 0,404341148 | 0,19  | 0,80174822  | 0,25  | 0,712121015 |
| Apc2    | -0,15 | 0,784951771 | -0,11 | 0,825662099 | -0,28 | 0,740600774 | 0,1   | 0,840108835 | -0,15 | 0,839779961 |
| Apcdd1  | -0,17 | 0,807246565 | -0,26 | 0,664765388 | 0,76  | 0,211244596 | -0,06 | 0,920158794 | -0,14 | 0,848977077 |
| Apcs    | 0,28  | 0,593540946 | -0,22 | 0,619501651 | -0,1  | 0,868131096 | 0,03  | 0,962043341 | -0,09 | 0,92741476  |
| Apeh    | -0,05 | 0,958188047 | -0,05 | 0,962617743 | 0,57  | 0,371992214 | 0,6   | 0,54787739  | 0,05  | 0,97694481  |
| Apela   | -0,31 | 0,461113298 | 0,24  | 0,827228251 | -0,25 | 0,804785961 | -1,16 | 0,292303436 | 0,53  | 0,626176831 |
| Apex1   | 0,01  | 0,994389926 | -0,23 | 0,716437544 | 0,6   | 0,41090242  | 0,75  | 0,181651374 | -0,1  | 0,946170694 |
| Apex2   | -0,14 | 0,895031891 | -0,09 | 0,942965593 | -0,32 | 0,72132637  | 0,96  | 0,129125759 | 0,31  | 0,716229308 |
| Aph1a   | -0,4  | 0,268112899 | -0,14 | 0,755498335 | 0,24  | 0,637321546 | 0,86  | 0,129977346 | -0,22 | 0,810820885 |
| Aph1b   | -0,06 | 0,948926586 | -0,39 | 0,705532323 | -0,33 | 0,661089127 | -1,06 | 0,079184178 | -0,56 | 0,566248044 |



|         |       |             |       |             |       |             |       |             |       |             |
|---------|-------|-------------|-------|-------------|-------|-------------|-------|-------------|-------|-------------|
| Aph1c   | -0,24 | 0,765643907 | 0,35  | 0,509013394 | 0,37  | 0,564103482 | 0,24  | 0,695155091 | -0,08 | 0,940774655 |
| Api5    | -0,1  | 0,846360756 | -0,33 | 0,591305258 | 1,35  | 0,169619185 | 0,34  | 0,5236293   | 0,29  | 0,671059641 |
| Apip    | -0,16 | 0,819634768 | -0,06 | 0,945980281 | 0,24  | 0,767822182 | 0,3   | 0,417563418 | -0,13 | 0,913414593 |
| Apitd1  | -0,86 | 0,187868882 | -0,47 | 0,656204868 | 1,62  | 0,006900627 | 0,81  | 0,180808692 | -0,56 | 0,368554903 |
| Aplf    | -0,02 | 0,983564276 | -0,47 | 0,435170839 | 0,11  | 0,922724053 | 0,98  | 0,079076467 | 0,22  | 0,78369432  |
| Apln    | -0,36 | 0,534017117 | -0,59 | 0,314703215 | 0,22  | 0,797912282 | 2,69  | 0,019068241 | -2,01 | 0,044184099 |
| Aplnr   | -1,91 | 0,077161113 | -1,05 | 0,083214618 | 1,91  | 0,046579559 | 1,94  | 0,014323597 | -2,21 | 0,013202628 |
| Aplp1   | -0,47 | 0,531156352 | -0,18 | 0,812664394 | 0,46  | 0,46169561  | -0,76 | 0,090670213 | -0,2  | 0,763277172 |
| Aplp2   | -0,34 | 0,306829062 | -0,16 | 0,7122758   | 0,23  | 0,807786405 | -0,37 | 0,267147508 | -0,27 | 0,602366706 |
| Apmap   | 0,27  | 0,600952042 | -0,54 | 0,642214918 | -0,78 | 0,247700466 | -0,37 | 0,588158097 | -0,08 | 0,919135849 |
| Apoa1   | -0,08 | 0,888817163 | 0,03  | 0,983071427 | 0,04  | 0,959862254 | 0,4   | 0,3780827   | 0,21  | 0,71265105  |
| Apoa1bp | 0,13  | 0,793209485 | -0,36 | 0,395321178 | 0,62  | 0,242696778 | 0,32  | 0,577360837 | -0,09 | 0,935289427 |
| Apoa2   | 0,43  | 0,439550201 | -0,52 | 0,691863875 | 0,12  | 0,906275304 | 1,01  | 0,066698831 | -0,28 | 0,796713037 |
| Apoa4   | -0,17 | 0,716161525 | -0,36 | 0,490650707 | -0,18 | 0,797779047 | 0,17  | 0,707902199 | 0,08  | 0,937558003 |
| Apoa5   | -0,4  | 0,600952042 | -0,26 | 0,674643073 | 0     | 0,998479656 | 0,14  | 0,708927801 | -0,61 | 0,338653241 |
| Apob    | 0,09  | 0,917711503 | -0,14 | 0,839283725 | -0,35 | 0,660920525 | -0,05 | 0,95852873  | 0,22  | 0,835191    |
| Apobec1 | -1,14 | 0,352898728 | -0,2  | 0,813150671 | 0,09  | 0,967767582 | -0,89 | 0,097710906 | -0,53 | 0,566999867 |
| Apobec2 | -0,13 | 0,766575514 | 0,22  | 0,825162812 | 0,01  | 0,992510518 | 0,14  | 0,857884225 | 0,09  | 0,916410813 |
| Apobec3 | 0,54  | 0,358933591 | 0,58  | 0,20454514  | -0,87 | 0,034271974 | -0,11 | 0,832609779 | 0,64  | 0,216981201 |
| Apobec4 | 0,34  | 0,54401985  | 0,11  | 0,828137336 | 0,02  | 0,982305856 | -0,18 | 0,759204304 | -0,07 | 0,934393574 |
| Apobr   | 0,31  | 0,495249753 | 0,06  | 0,919659005 | 0,35  | 0,438417402 | 0,5   | 0,295360318 | 0,02  | 0,984125319 |
| Apoc1   | 0,21  | 0,700358581 | -0,13 | 0,809683705 | 0,1   | 0,880706627 | -0,07 | 0,907539958 | -0,1  | 0,909024113 |
| Apoc2   | 0,04  | 0,953627422 | 0,12  | 0,933597858 | 0,16  | 0,880706627 | -0,15 | 0,805908965 | -0,14 | 0,885673683 |
| Apoc3   | 0,22  | 0,79721511  | -0,04 | 0,949168867 | -0,26 | 0,817808747 | 0,03  | 0,969193633 | -0,35 | 0,729208209 |
| Apoc4   | 0,08  | 0,929432086 | -0,55 | 0,341083995 | 0,01  | 0,99452103  | 0,27  | 0,48505774  | 0,23  | 0,795118541 |
| Apod    | -0,23 | 0,815599419 | 0,4   | 0,446315327 | -0,58 | 0,810518763 | -1,2  | 0,308218931 | -0,03 | 0,990633766 |
| Apoe    | -0,56 | 0,26600215  | -0,32 | 0,635138707 | 0,48  | 0,353905777 | -2,54 | 0,003907268 | -0,34 | 0,484862172 |
| Apof    | 0,04  | 0,960052101 | 0,3   | 0,571596794 | 0,09  | 0,896181325 | -0,11 | 0,767937787 | 0,57  | 0,33502287  |
| Apoh    | -0,28 | 0,648730873 | 0,27  | 0,613344994 | 0,46  | 0,38497941  | 0,01  | 0,988205241 | -0,29 | 0,80155635  |
| Apol10b | 1,47  | 0,196478065 | 1,21  | 0,185367049 | -2,31 | 0,007762683 | 0,88  | 0,038935822 | 1,63  | 0,013431226 |
| Apol11a | -0,04 | 0,958512892 | 0,19  | 0,764886087 | -0,27 | 0,610141978 | 0,02  | 0,968370516 | -0,07 | 0,921263496 |
| Apol11b | -0,24 | 0,807576242 | 0,98  | 0,43105638  | -1,22 | 0,275682956 | -1,46 | 0,36184569  | 1,11  | 0,466023738 |
| Apol6   | 2,62  | 0,045473481 | 0,82  | 0,125546981 | -0,98 | 0,27041915  | 0,02  | 0,980469902 | 0,43  | 0,471919432 |
| Apol7a  | 0     | 0,998027251 | 0,25  | 0,492900462 | 0,18  | 0,805783058 | -0,39 | 0,540951246 | -1,1  | 0,048272729 |
| Apol7b  | 0,13  | 0,802334341 | 0,26  | 0,656204868 | -0,55 | 0,509702247 | 0,25  | 0,711725901 | 1     | 0,123111339 |

|          |       |             |       |             |       |             |       |             |       |             |
|----------|-------|-------------|-------|-------------|-------|-------------|-------|-------------|-------|-------------|
| Apol7c   | 0,01  | 0,998769353 | 0,12  | 0,932292974 | 0,06  | 0,95572014  | 2,52  | 0,239185309 | 2,41  | 0,251199318 |
| Apol7d   | -0,01 | 0,997205466 | 0     | 1           | -0,1  | 0,921956183 | 0,02  | 0,985865561 | -0,07 | 0,948935854 |
| Apol7e   | 0,06  | 0,945677516 | 1,02  | 0,564387918 | -0,32 | 0,842919139 | 0,04  | 0,92678264  | 2,41  | 0,052098414 |
| Apol8    | 0,82  | 0,421957622 | 0,32  | 0,808765248 | -0,19 | 0,947117869 | 0,78  | 0,490176405 | -0,35 | 0,654022675 |
| Apol9a   | 1,29  | 0,059511737 | 1,37  | 0,087315688 | -0,35 | 0,774292895 | -1,06 | 0,031119782 | 1,43  | 0,01494486  |
| Apol9b   | 1,16  | 0,08143898  | 1,48  | 0,087315688 | -0,88 | 0,21874589  | -1,19 | 0,045711543 | 1,33  | 0,016672287 |
| Apold1   | -0,04 | 0,946792769 | 0     | 1           | -0,11 | 0,889075746 | 0,59  | 0,13326442  | 0,25  | 0,654732327 |
| Apom     | 0,19  | 0,807062435 | -0,4  | 0,593777931 | -0,21 | 0,743645863 | 0,04  | 0,969193633 | 0,06  | 0,977599806 |
| Apon     | 0,45  | 0,242076986 | 0,35  | 0,632756037 | -0,98 | 0,033719197 | -0,53 | 0,504357302 | 0,2   | 0,917710291 |
| Apoo     | 0,14  | 0,803557792 | 0,17  | 0,818072947 | 0,28  | 0,711057635 | -0,24 | 0,631067875 | -0,04 | 0,955654991 |
| Apool    | -0,06 | 0,946472896 | 0,26  | 0,568304052 | 0,21  | 0,827945197 | 0,72  | 0,047606739 | -0,09 | 0,930575749 |
| Apopt1   | -0,26 | 0,7830424   | 0,05  | 0,965796793 | -0,7  | 0,186321498 | -0,39 | 0,43453729  | -0,16 | 0,864415219 |
| App      | 0,09  | 0,892124736 | 0,25  | 0,564501034 | -0,32 | 0,628978443 | -0,5  | 0,195221568 | 0,08  | 0,923040447 |
| Appbp2   | -0,02 | 0,983663467 | 0,16  | 0,864027191 | 0,47  | 0,624087446 | 0,34  | 0,453365821 | 0,4   | 0,447019099 |
| Appbp2os | -0,43 | 0,473883942 | -0,21 | 0,829892665 | -0,35 | 0,714109192 | 0,14  | 0,794165367 | -0,47 | 0,675830386 |
| App11    | 0,25  | 0,683444889 | -0,01 | 0,995205602 | 0,15  | 0,853998055 | -0,11 | 0,845785501 | 0,18  | 0,808079104 |
| App12    | 0,05  | 0,956736151 | -0,04 | 0,963369162 | -0,01 | 0,997220401 | 0,62  | 0,353241029 | -0,5  | 0,587305934 |
| Aprt     | -0,11 | 0,781662737 | -0,54 | 0,274811602 | 0,38  | 0,481896699 | 1,58  | 0,02129127  | -0,63 | 0,32673984  |
| Aptx     | 0,01  | 0,996219097 | 0,22  | 0,62078382  | -0,28 | 0,637444183 | -0,15 | 0,675727528 | 0,33  | 0,643580968 |
| Aqp1     | -0,8  | 0,253309987 | -0,17 | 0,738762579 | 0,24  | 0,804816042 | -1,1  | 0,047695121 | -0,26 | 0,699060093 |
| Aqp11    | 0,14  | 0,815872958 | 0,34  | 0,642214918 | 0,59  | 0,507095234 | -2,79 | 0,018342746 | -0,8  | 0,276013963 |
| Aqp12    | 0,25  | 0,717407143 | -0,06 | 0,940269529 | -0,38 | 0,598179126 | 0,1   | 0,896599656 | 0,01  | 0,985515704 |
| Aqp2     | -0,26 | 0,577023672 | -0,19 | 0,891604584 | -0,03 | 0,967127816 | 0,26  | 0,604127556 | 0,22  | 0,788112596 |
| Aqp3     | -0,03 | 0,969553502 | -0,19 | 0,75380926  | 0,02  | 0,985326269 | -0,09 | 0,866757253 | 0,28  | 0,716229308 |
| Aqp4     | -0,05 | 0,963914207 | 0,06  | 0,960900214 | 0,03  | 0,968399063 | 0,06  | 0,905746179 | 0,06  | 0,95539912  |
| Aqp5     | 0,31  | 0,493929    | -0,16 | 0,74717977  | 0,11  | 0,909221198 | -0,02 | 0,9704566   | -0,09 | 0,904040121 |
| Aqp6     | 0,23  | 0,662416763 | -0,04 | 0,950654933 | -0,57 | 0,368286481 | -0,06 | 0,927265002 | -0,23 | 0,763240477 |
| Aqp7     | -0,29 | 0,704601647 | 0,09  | 0,982053677 | -1,86 | 0,099237376 | -2,56 | 0,044115677 | -1,97 | 0,056246954 |
| Aqp8     | 0,45  | 0,475428823 | 0,3   | 0,736459323 | -0,4  | 0,503819492 | 0,29  | 0,44804832  | 0,04  | 0,969957863 |
| Aqp9     | 0,14  | 0,843281524 | -0,2  | 0,83754738  | 0,12  | 0,86935713  | -0,07 | 0,882936813 | -0,37 | 0,42691385  |
| Aqr      | -0,25 | 0,626534172 | -0,11 | 0,809963911 | 0,12  | 0,880140788 | -0,28 | 0,49298547  | -0,38 | 0,611322816 |
| Ar       | 0,85  | 0,322835282 | 0,97  | 0,208445991 | 0,09  | 0,94178334  | -4,67 | 0,005310772 | 0,16  | 0,906117814 |
| Araf     | -0,1  | 0,864598944 | -0,04 | 0,948195136 | -0,06 | 0,932577939 | 0,06  | 0,91243333  | -0,09 | 0,91314596  |
| Arap1    | -0,18 | 0,776006017 | -0,11 | 0,897867961 | -0,29 | 0,762462025 | -0,03 | 0,960747562 | 0,08  | 0,926505783 |
| Arap2    | -0,01 | 0,995122815 | 0,18  | 0,934294134 | 0,72  | 0,379638471 | -3    | 0,022988345 | 0,81  | 0,395174487 |

|            |       |             |       |             |       |             |       |             |       |             |
|------------|-------|-------------|-------|-------------|-------|-------------|-------|-------------|-------|-------------|
| Arap3      | 0,04  | 0,946792769 | 0,1   | 0,919873208 | -0,1  | 0,904057901 | -0,04 | 0,961558651 | -0,33 | 0,562557824 |
| Arc        | 0,25  | 0,721512947 | -0,33 | 0,732847182 | -0,17 | 0,876684089 | -2,63 | 0,004853653 | 0,02  | 0,982316618 |
| Arcn1      | -0,04 | 0,941765459 | -0,06 | 0,926157704 | 0,01  | 0,990836784 | 0,7   | 0,204370449 | 0,14  | 0,884640084 |
| Areg       | -0,15 | 0,882060783 | 0,14  | 0,911148146 | 0,8   | 0,321560439 | -1,73 | 0,219211103 | 1,1   | 0,506874725 |
| Arel1      | 0,55  | 0,234445333 | 0,84  | 0,153524445 | -0,89 | 0,101336106 | 0,4   | 0,610095355 | 0,81  | 0,242630806 |
| Arf1       | 0,05  | 0,93591031  | -0,07 | 0,955475499 | 0,09  | 0,911560317 | 0,61  | 0,246858658 | 0,15  | 0,879398898 |
| Arf2       | -0,23 | 0,714127381 | 0     | 1           | -0,19 | 0,813180174 | -0,74 | 0,089200879 | 0,09  | 0,902899311 |
| Arf3       | -0,24 | 0,600246297 | 0,29  | 0,536246395 | 0,01  | 0,997220401 | 0,74  | 0,207857778 | 0,59  | 0,330314966 |
| Arf4       | -0,12 | 0,764288636 | 0,13  | 0,772167537 | -0,02 | 0,985326269 | 0,6   | 0,111785406 | 0,64  | 0,220159635 |
| Arf4os     | 0,41  | 0,421957622 | 0,25  | 0,747707816 | -0,4  | 0,628963172 | 0,74  | 0,072977347 | 0,54  | 0,422772645 |
| Arf5       | -0,05 | 0,927051853 | -0,12 | 0,86297915  | 0,24  | 0,670631235 | 0,51  | 0,17736213  | -0,39 | 0,498803884 |
| Arf6       | -0,08 | 0,932713291 | 0,14  | 0,821227978 | 0,52  | 0,609800212 | 0,83  | 0,19247613  | -0,15 | 0,856534656 |
| Arfgap1    | -0,21 | 0,712570929 | 0,05  | 0,963662843 | 0,22  | 0,804434463 | 0,57  | 0,32916006  | 0,03  | 0,97683359  |
| Arfgap2    | -0,56 | 0,353022744 | -0,22 | 0,839789639 | 0,33  | 0,569097406 | -0,01 | 0,978056041 | -0,07 | 0,923039028 |
| Arfgap3    | 0,13  | 0,853439426 | -0,33 | 0,622855078 | 0,49  | 0,547221473 | 0,97  | 0,085668841 | 0,06  | 0,952753183 |
| Arfgef1    | 0,06  | 0,936871609 | 0,52  | 0,223066162 | 0,03  | 0,979196406 | 0     | 1           | 0,77  | 0,076939475 |
| Arfgef2    | -0,39 | 0,515770167 | -0,12 | 0,85726965  | 0,28  | 0,590123815 | -0,51 | 0,140709023 | -0,14 | 0,85508146  |
| Arfgef3    | 0,12  | 0,897481914 | 0,04  | 0,962600054 | 1,03  | 0,012240129 | -0,16 | 0,71158821  | -0,19 | 0,840567186 |
| Arfip1     | -0,47 | 0,701240709 | -0,12 | 0,900801202 | 1,07  | 0,225514917 | 0,05  | 0,921929178 | -0,15 | 0,819072786 |
| Arfip2     | -0,7  | 0,161204556 | -0,17 | 0,656294004 | 0,45  | 0,368620918 | 0,17  | 0,682271527 | -0,17 | 0,796586414 |
| Arfrp1     | -0,05 | 0,958188047 | 0,03  | 0,958449675 | -0,57 | 0,469053827 | -0,18 | 0,653400029 | -0,03 | 0,973428839 |
| Arg1       | -0,35 | 0,592209611 | -0,01 | 0,997700959 | 1,13  | 0,381006373 | 0,66  | 0,17854439  | 0,13  | 0,913553402 |
| Arg2       | 0,14  | 0,827055517 | -0,35 | 0,748874675 | 0,02  | 0,991568687 | 0     | 1           | 0,02  | 0,99004065  |
| Arglu1     | -0,31 | 0,598597881 | 0     | 1           | -0,19 | 0,720389578 | 0,24  | 0,594574312 | 0,16  | 0,786585036 |
| Arhgap1    | -0,3  | 0,469692532 | -0,09 | 0,867265251 | 0,87  | 0,10424513  | 0,15  | 0,701244174 | -0,23 | 0,715424689 |
| Arhgap10   | -0,46 | 0,692841452 | -0,47 | 0,271145766 | 0,45  | 0,543291636 | 1,28  | 0,066910258 | -0,41 | 0,637300707 |
| Arhgap11a  | -1,04 | 0,328021998 | -1,07 | 0,314703215 | 1,47  | 0,002978188 | 2,44  | 0,013556826 | 0,05  | 0,973026298 |
| Arhgap12   | -0,04 | 0,98120593  | 0,11  | 0,961657201 | 0,48  | 0,59976087  | -0,48 | 0,485770197 | -0,32 | 0,84147389  |
| Arhgap15   | -0,04 | 0,964124037 | 0,11  | 0,915213759 | -0,47 | 0,30134516  | -0,11 | 0,902914467 | 0,11  | 0,901132475 |
| Arhgap15os | 0,53  | 0,190706898 | 0     | 1           | -0,02 | 0,982241391 | 0,15  | 0,825258543 | 0,27  | 0,587915673 |
| Arhgap17   | 0,1   | 0,844095084 | 0     | 1           | 0,06  | 0,94665439  | -0,35 | 0,415968391 | -0,12 | 0,874342066 |
| Arhgap18   | -1,04 | 0,154960518 | -0,47 | 0,322591012 | 0,51  | 0,472399709 | 1,78  | 0,032044874 | -0,07 | 0,953297732 |
| Arhgap19   | -0,84 | 0,417482906 | -1,39 | 0,094438943 | 1,21  | 0,027133603 | -0,32 | 0,687560664 | -0,88 | 0,433785775 |
| Arhgap20   | -0,01 | 0,991125401 | -0,42 | 0,598373122 | 0,28  | 0,755588608 | -1,04 | 0,224042353 | -0,1  | 0,947257087 |
| Arhgap20os | 0,04  | 0,959985598 | 0,51  | 0,467937133 | -0,21 | 0,777918093 | -0,27 | 0,490176405 | -0,07 | 0,935548264 |

|             |       |             |       |             |       |             |       |             |       |             |
|-------------|-------|-------------|-------|-------------|-------|-------------|-------|-------------|-------|-------------|
| Arhgap21    | -0,03 | 0,950229645 | 0     | 0,999395995 | 0,31  | 0,599198745 | 0,95  | 0,075762884 | 0,2   | 0,801385411 |
| Arhgap22    | 0,23  | 0,60097232  | -0,13 | 0,823922494 | 0,39  | 0,661747229 | 0,55  | 0,242730241 | -0,21 | 0,809383333 |
| Arhgap23    | -0,11 | 0,875121421 | -0,26 | 0,54678282  | 0,21  | 0,777918093 | 0,03  | 0,957427513 | -0,14 | 0,884244347 |
| Arhgap24    | -0,29 | 0,689253784 | -0,04 | 0,958663163 | 0,15  | 0,839096359 | -0,64 | 0,284940277 | -0,08 | 0,948935854 |
| Arhgap25    | -0,51 | 0,56312242  | 0,34  | 0,649611595 | 0,31  | 0,721369858 | 0,97  | 0,057215016 | 0,12  | 0,860919132 |
| Arhgap26    | 0,04  | 0,958535933 | 0,01  | 0,993221425 | -0,43 | 0,613433145 | -0,34 | 0,398550194 | 0,11  | 0,865258929 |
| Arhgap27    | -0,84 | 0,194977962 | -1,04 | 0,120465463 | 0,45  | 0,605650778 | -0,14 | 0,792680799 | -0,48 | 0,392028688 |
| Arhgap27os1 | 0,04  | 0,933039985 | 0,04  | 0,950735391 | -0,33 | 0,671012215 | -0,24 | 0,579333727 | 0,1   | 0,892202797 |
| Arhgap27os2 | -0,19 | 0,631184136 | 0,04  | 0,938088718 | -0,3  | 0,475944471 | 0,08  | 0,862217405 | 0,08  | 0,921349205 |
| Arhgap27os3 | 0,27  | 0,716985606 | 0,3   | 0,469596239 | 0,14  | 0,824306509 | -0,01 | 0,995978707 | 0,07  | 0,9687351   |
| Arhgap28    | 0,04  | 0,969577981 | 0,53  | 0,282493214 | -0,29 | 0,737241227 | 2,52  | 0,010315712 | 0,9   | 0,20389911  |
| Arhgap29    | -0,18 | 0,641357042 | -0,15 | 0,824372931 | -0,1  | 0,920926565 | 0,55  | 0,13605776  | -0,53 | 0,272652221 |
| Arhgap30    | 0,35  | 0,593510013 | -0,03 | 0,980518468 | -0,37 | 0,493193538 | 0,07  | 0,921774207 | -0,27 | 0,738853855 |
| Arhgap31    | -0,38 | 0,469692532 | -0,3  | 0,519915586 | 0,21  | 0,806086881 | -0,26 | 0,552840446 | -0,27 | 0,674843991 |
| Arhgap32    | -0,33 | 0,803761785 | -0,09 | 0,965147491 | -0,87 | 0,14354218  | -2,52 | 0,004579459 | -0,39 | 0,544355542 |
| Arhgap33    | -0,08 | 0,905119661 | -0,15 | 0,87981455  | -0,34 | 0,679486325 | 0,04  | 0,956015204 | -0,19 | 0,735152891 |
| Arhgap33os  | 0,06  | 0,937129467 | 0,18  | 0,661976216 | 0     | 0,997268369 | -0,23 | 0,546558562 | 0,13  | 0,865866242 |
| Arhgap35    | -0,26 | 0,721378796 | -0,44 | 0,615058004 | 0,94  | 0,26478657  | -0,04 | 0,941093315 | -0,36 | 0,487871064 |
| Arhgap36    | -0,16 | 0,837433306 | -0,22 | 0,731503149 | -0,03 | 0,967903907 | 0,27  | 0,678790333 | 0,19  | 0,825862506 |
| Arhgap39    | -0,02 | 0,978394906 | 0,41  | 0,732847182 | -0,37 | 0,57152691  | -0,83 | 0,18074023  | -0,62 | 0,23680437  |
| Arhgap4     | 0,18  | 0,900059952 | 0,45  | 0,750325684 | -0,3  | 0,772397144 | -0,06 | 0,969624323 | 0,22  | 0,872242794 |
| Arhgap40    | 0,15  | 0,796294922 | -0,08 | 0,95830747  | -0,15 | 0,861623247 | -0,26 | 0,766343388 | -0,09 | 0,932268703 |
| Arhgap42    | -0,19 | 0,8993604   | 0,49  | 0,69562011  | 0,43  | 0,730738549 | -2,13 | 0,005310772 | -0,95 | 0,076574892 |
| Arhgap44    | -0,31 | 0,689966234 | -0,3  | 0,562637628 | 0,08  | 0,922318683 | -1,27 | 0,051689358 | -0,22 | 0,799638391 |
| Arhgap5     | 0,49  | 0,536711466 | -0,23 | 0,809683705 | 0,84  | 0,610689584 | -0,57 | 0,48485622  | -0,28 | 0,808989975 |
| Arhgap6     | -0,52 | 0,278797445 | 0,3   | 0,614530823 | -0,81 | 0,229527092 | -0,85 | 0,348919596 | -0,38 | 0,749100093 |
| Arhgap8     | 0,5   | 0,511005771 | 1,41  | 0,341114606 | -1,67 | 0,010827278 | -1,05 | 0,33402875  | 0,39  | 0,698795718 |
| Arhgap9     | 0,4   | 0,493929    | 0,24  | 0,628776172 | -0,07 | 0,953007693 | -0,5  | 0,390823877 | -0,11 | 0,91398047  |
| Arhgdia     | -0,26 | 0,491195939 | -0,13 | 0,761820188 | -0,03 | 0,969992596 | 0,34  | 0,284257659 | 0,02  | 0,979338129 |
| Arhgdib     | -0,48 | 0,5543272   | -0,4  | 0,537538565 | 0,2   | 0,888377256 | -0,26 | 0,679463308 | -0,84 | 0,098490291 |
| Arhgdig     | -0,25 | 0,620468351 | -0,2  | 0,725256393 | -0,07 | 0,937245525 | -0,36 | 0,393171849 | -0,38 | 0,603475681 |
| Arhgef1     | -0,35 | 0,394571141 | -0,64 | 0,291180284 | -0,11 | 0,902759684 | -0,02 | 0,966701307 | -0,59 | 0,188748194 |
| Arhgef10    | -1,06 | 0,214430522 | -0,55 | 0,506403012 | 0,04  | 0,969269701 | -1,46 | 0,032032534 | -0,58 | 0,397481272 |
| Arhgef10l   | -0,09 | 0,919126404 | -0,37 | 0,420739829 | 0,4   | 0,436827113 | -0,67 | 0,093220352 | -0,45 | 0,34276619  |
| Arhgef11    | 0,21  | 0,617280733 | 0,23  | 0,716437544 | 0,24  | 0,674349954 | -0,21 | 0,672331878 | -0,05 | 0,950308536 |

|          |       |             |       |             |       |             |       |             |       |             |
|----------|-------|-------------|-------|-------------|-------|-------------|-------|-------------|-------|-------------|
| Arhgef12 | -0,34 | 0,515553718 | -0,16 | 0,851610126 | 0,15  | 0,797422121 | -0,1  | 0,886903189 | -0,34 | 0,585118808 |
| Arhgef15 | -0,82 | 0,110762724 | -0,07 | 0,89474699  | 0,14  | 0,870999154 | -0,73 | 0,112352626 | -0,31 | 0,575004207 |
| Arhgef16 | -0,15 | 0,844688163 | 0,03  | 0,974580396 | 0,16  | 0,811155677 | -0,11 | 0,873812847 | -0,07 | 0,946463658 |
| Arhgef17 | -0,26 | 0,840218728 | 0,01  | 0,994486533 | 0,93  | 0,206505714 | -1,65 | 0,024040886 | -0,61 | 0,217859301 |
| Arhgef18 | -0,11 | 0,870052902 | -0,4  | 0,695689103 | -0,2  | 0,730738549 | -0,25 | 0,699348716 | -0,4  | 0,699402944 |
| Arhgef19 | -0,3  | 0,575887113 | 0,61  | 0,395397848 | -0,13 | 0,882540073 | -0,7  | 0,285133875 | -0,29 | 0,770769597 |
| Arhgef2  | -0,33 | 0,547739213 | 0,03  | 0,978547588 | -0,24 | 0,746570045 | -0,37 | 0,39527702  | -0,69 | 0,166595171 |
| Arhgef25 | -0,21 | 0,778869381 | -0,25 | 0,806802876 | 0,72  | 0,344676655 | -0,72 | 0,35953164  | -0,65 | 0,409720233 |
| Arhgef26 | -0,17 | 0,796967364 | -0,09 | 0,847081019 | 0,51  | 0,624057916 | 0,15  | 0,830299574 | -0,5  | 0,536721752 |
| Arhgef28 | -0,39 | 0,537345693 | -0,05 | 0,948767477 | 0,63  | 0,352312788 | 0,29  | 0,618453093 | -0,33 | 0,640213665 |
| Arhgef3  | 0,5   | 0,36240006  | 0,7   | 0,263577661 | -0,64 | 0,285602719 | -0,99 | 0,081926117 | 0,09  | 0,927296036 |
| Arhgef33 | -0,5  | 0,403771843 | 0,12  | 0,824372931 | -0,08 | 0,922318683 | -0,07 | 0,920317721 | -0,07 | 0,952296554 |
| Arhgef37 | 0,03  | 0,964154899 | -0,19 | 0,815142707 | -0,26 | 0,694206736 | -0,18 | 0,82406667  | 0,41  | 0,728388857 |
| Arhgef38 | -0,17 | 0,749904144 | -0,08 | 0,922703368 | -0,02 | 0,993379272 | 0,32  | 0,40183189  | 0,19  | 0,80222716  |
| Arhgef39 | 0,08  | 0,907008083 | -0,36 | 0,673912079 | 0,37  | 0,582602275 | 0,42  | 0,55067293  | -0,11 | 0,909363599 |
| Arhgef4  | 0,34  | 0,59710379  | 0,2   | 0,909079807 | 0,3   | 0,660567041 | 0,35  | 0,716627025 | -0,05 | 0,97206128  |
| Arhgef40 | -0,75 | 0,336543382 | -0,74 | 0,289402333 | 0,62  | 0,399470425 | -0,75 | 0,146690702 | -1,12 | 0,117149411 |
| Arhgef5  | -0,29 | 0,568290671 | 0,16  | 0,747707816 | 0,42  | 0,545567013 | 0,61  | 0,13409404  | 0,04  | 0,966951657 |
| Arhgef6  | -0,33 | 0,674821764 | -0,79 | 0,495742596 | 0,03  | 0,984778342 | -0,33 | 0,676580591 | -0,06 | 0,953297732 |
| Arhgef7  | -0,31 | 0,559210112 | 0,04  | 0,974702154 | 0,08  | 0,905967183 | 0,44  | 0,625605007 | 0,2   | 0,845667625 |
| Arhgef9  | -0,12 | 0,910211895 | -0,15 | 0,926134516 | 0,11  | 0,91344763  | -1,6  | 0,094579932 | -0,77 | 0,545166604 |
| Arid1a   | -0,22 | 0,586423493 | 0,04  | 0,935984823 | 0,34  | 0,555899224 | -0,48 | 0,142666892 | -0,29 | 0,59741971  |
| Arid1b   | 0,23  | 0,640414995 | 0,13  | 0,80678645  | 0,16  | 0,790468311 | -0,26 | 0,526158086 | 0,09  | 0,902802615 |
| Arid2    | 0,36  | 0,587011701 | 0,11  | 0,827496723 | 0,55  | 0,410239762 | -0,08 | 0,907662772 | -0,04 | 0,97425848  |
| Arid3a   | -0,17 | 0,830204798 | -0,01 | 0,996113371 | 0,17  | 0,887429895 | 0,25  | 0,745782308 | -0,15 | 0,887702206 |
| Arid3b   | 0,41  | 0,486906643 | 0,44  | 0,493080796 | -0,4  | 0,68845998  | -0,12 | 0,911611841 | -0,04 | 0,979456872 |
| Arid3c   | -0,36 | 0,648730873 | -0,18 | 0,809683705 | -0,04 | 0,976042637 | 0,15  | 0,797527363 | 0,12  | 0,884248437 |
| Arid4a   | 0,41  | 0,413477239 | 1,1   | 0,16121328  | -0,79 | 0,132478136 | -0,41 | 0,486660202 | 1,1   | 0,060191534 |
| Arid4b   | 0,32  | 0,558653062 | 0,08  | 0,912535732 | -0,19 | 0,777387225 | 0,17  | 0,789082749 | 0,37  | 0,581802025 |
| Arid5a   | 0,65  | 0,351518071 | 0,4   | 0,574767565 | -0,47 | 0,576592414 | -0,42 | 0,437001704 | 0,35  | 0,576308364 |
| Arid5b   | 0,69  | 0,260729979 | 0,66  | 0,152199284 | -0,67 | 0,20524088  | -0,64 | 0,073909416 | 0,16  | 0,791971532 |
| Arih1    | 0,11  | 0,864403632 | 0,52  | 0,459231649 | -0,29 | 0,648315091 | -0,22 | 0,800669343 | 0,49  | 0,563077271 |
| Arih2    | -0,22 | 0,806491264 | -0,01 | 0,998513452 | 0,21  | 0,765570799 | 0,64  | 0,086968945 | -0,07 | 0,949244147 |
| Arih2os  | 0,13  | 0,867103186 | 0,26  | 0,590119384 | -0,18 | 0,853040826 | -0,3  | 0,549014569 | -0,04 | 0,970154126 |
| Arl1     | 0,04  | 0,947195768 | -0,07 | 0,903682621 | 1,09  | 0,181137546 | 0,39  | 0,343177173 | 0,16  | 0,839824817 |

|          |       |             |       |             |       |             |       |             |       |             |
|----------|-------|-------------|-------|-------------|-------|-------------|-------|-------------|-------|-------------|
| Arl10    | 0,06  | 0,914596376 | -0,05 | 0,961709816 | 0,63  | 0,589916271 | -0,19 | 0,628658299 | 0,33  | 0,619416028 |
| Arl11    | -0,1  | 0,856341563 | 0,01  | 0,9951682   | -0,05 | 0,967119607 | 0,02  | 0,98283761  | 0,08  | 0,938573877 |
| Arl13a   | -0,28 | 0,476711439 | -0,24 | 0,599008089 | 0,09  | 0,906709737 | 0,29  | 0,501683233 | -0,24 | 0,741670129 |
| Arl13b   | 0,18  | 0,757386964 | 0,13  | 0,832748574 | 0,5   | 0,316019354 | -0,11 | 0,811723478 | 0,11  | 0,916173996 |
| Arl14    | 0,02  | 0,970286316 | -0,07 | 0,896707162 | 0,3   | 0,669548016 | 0,04  | 0,932315462 | -0,05 | 0,952718905 |
| Arl14ep  | 0,26  | 0,531163951 | 0,35  | 0,509013394 | -0,41 | 0,588879542 | -0,08 | 0,894076875 | 0,34  | 0,529853591 |
| Arl14epI | 0,16  | 0,67806773  | -0,06 | 0,936792848 | 0,03  | 0,968742139 | -0,07 | 0,889039593 | 0,04  | 0,961281513 |
| Arl15    | -0,02 | 0,985209506 | -0,13 | 0,882589938 | -0,66 | 0,380830666 | -0,44 | 0,2422298   | -0,8  | 0,075407914 |
| Arl16    | -0,08 | 0,938106189 | -0,25 | 0,804868131 | -0,05 | 0,980713449 | 0     | 1           | 0,01  | 0,992696955 |
| Arl2     | 0,51  | 0,203168309 | 0,39  | 0,431022747 | -0,29 | 0,706714392 | -0,31 | 0,50536399  | 1,06  | 0,045311431 |
| Arl2bp   | -0,78 | 0,183172541 | -0,49 | 0,341083995 | 0,69  | 0,686625108 | 0,08  | 0,898060855 | -0,54 | 0,647258599 |
| Arl3     | 0,07  | 0,887555241 | -0,03 | 0,959837002 | 0,04  | 0,972847253 | -0,25 | 0,455201302 | -0,21 | 0,801720063 |
| Arl4a    | 0,07  | 0,909885273 | 0,54  | 0,406817158 | -0,86 | 0,206505714 | -0,74 | 0,061906738 | 1,06  | 0,053570529 |
| Arl4aos  | 0,29  | 0,793209485 | 0,08  | 0,884978392 | 0,04  | 0,956164479 | -0,07 | 0,864719338 | -0,22 | 0,69063878  |
| Arl4c    | -0,31 | 0,620305961 | 0,49  | 0,611813884 | 0,49  | 0,519796196 | 0,79  | 0,208737189 | 0,07  | 0,95587699  |
| Arl4d    | 0,03  | 0,98456417  | 0,65  | 0,570441768 | 0     | 0,999329448 | -2,27 | 0,00517713  | -0,25 | 0,726042963 |
| Arl5a    | -0,34 | 0,433697955 | 0,14  | 0,718810401 | 0,6   | 0,235612389 | 0,85  | 0,153265608 | -0,19 | 0,890957032 |
| Arl5b    | 0,43  | 0,302609278 | 0,03  | 0,970832543 | -0,01 | 0,997268369 | -0,07 | 0,890741892 | 0,11  | 0,866473253 |
| Arl5c    | -0,34 | 0,738714467 | 0,25  | 0,735852142 | 0,29  | 0,688643408 | -0,35 | 0,469470813 | -0,14 | 0,907002987 |
| Arl6     | -0,22 | 0,665320629 | -0,16 | 0,897811179 | 0,23  | 0,834017354 | 0,71  | 0,510816298 | -0,16 | 0,913414593 |
| Arl6ip1  | 0,15  | 0,773271414 | -0,09 | 0,850001559 | -0,59 | 0,188458261 | -0,13 | 0,690997007 | 0,36  | 0,512907543 |
| Arl6ip4  | -0,17 | 0,77911408  | -0,31 | 0,442648588 | 0,34  | 0,414922527 | 0,17  | 0,625074198 | -0,14 | 0,865258929 |
| Arl6ip5  | 0,18  | 0,664871761 | 0,41  | 0,325242663 | 0,1   | 0,883534784 | -0,28 | 0,442767186 | 0,51  | 0,286436347 |
| Arl6ip6  | -0,45 | 0,373935464 | -0,67 | 0,434358293 | -0,12 | 0,903366838 | 0,43  | 0,285826337 | 0,15  | 0,867317374 |
| Arl8a    | -0,11 | 0,863048221 | 0,05  | 0,912379377 | -0,2  | 0,760721308 | 0,38  | 0,236937742 | 0,03  | 0,968952017 |
| Arl8b    | -0,01 | 0,98297164  | 0,05  | 0,915784454 | 0,21  | 0,796904065 | -0,13 | 0,796985281 | 0,25  | 0,702558142 |
| Arl9     | 0,22  | 0,839118329 | 0,15  | 0,855702031 | -0,13 | 0,918668428 | 0,38  | 0,262003551 | 0,13  | 0,866693394 |
| Armc1    | -0,09 | 0,907391935 | -0,17 | 0,729423334 | 0,27  | 0,832500603 | -0,08 | 0,897599603 | -0,2  | 0,840952901 |
| Armc10   | -0,38 | 0,587789605 | 0,05  | 0,947992182 | 0,4   | 0,483761569 | -0,11 | 0,857805737 | -0,24 | 0,799340413 |
| Armc12   | 0,68  | 0,239601221 | -0,07 | 0,926353869 | -0,02 | 0,973341568 | -0,31 | 0,496598311 | 0,24  | 0,773401088 |
| Armc2    | -0,05 | 0,945173755 | 0,11  | 0,89081665  | 0,42  | 0,46169561  | -0,12 | 0,870331513 | -0,38 | 0,578362973 |
| Armc3    | 0,45  | 0,453653527 | 0     | 1           | -0,14 | 0,805783058 | -0,08 | 0,902706786 | -0,09 | 0,925858284 |
| Armc4    | 0,26  | 0,666546952 | -0,3  | 0,594415097 | -0,06 | 0,949039966 | 0,14  | 0,745782308 | 0,1   | 0,887722358 |
| Armc5    | -0,14 | 0,841140165 | 0,09  | 0,853388981 | 0,33  | 0,517516134 | 0,35  | 0,729857506 | -0,37 | 0,727849883 |
| Armc6    | 0,09  | 0,88252993  | 0,39  | 0,6817338   | 0,09  | 0,909717677 | -0,13 | 0,734587328 | -0,3  | 0,571139447 |

|        |       |             |       |             |       |             |       |             |       |             |
|--------|-------|-------------|-------|-------------|-------|-------------|-------|-------------|-------|-------------|
| Armc7  | 0,09  | 0,900340189 | 0,13  | 0,807674009 | -0,34 | 0,727262258 | 0,76  | 0,215692564 | -0,19 | 0,882728747 |
| Armc8  | 0,17  | 0,764982594 | 0,46  | 0,615698474 | -0,25 | 0,681836204 | -0,69 | 0,222147307 | 0,39  | 0,421404776 |
| Armc9  | 0     | 0,999288019 | -0,07 | 0,958545812 | -0,16 | 0,840308671 | -0,18 | 0,710912745 | -0,41 | 0,626176831 |
| Armcx1 | -0,7  | 0,330325888 | -1,27 | 0,389273523 | -0,05 | 0,988640659 | 0,87  | 0,225406554 | -0,93 | 0,240846227 |
| Armcx2 | -0,5  | 0,563109302 | -0,4  | 0,782576432 | 0,32  | 0,696253875 | 1,35  | 0,172485486 | 0,07  | 0,974950753 |
| Armcx3 | 0,21  | 0,836344315 | -0,22 | 0,878725004 | 0,28  | 0,760075811 | 0,29  | 0,754131064 | -0,5  | 0,653769438 |
| Armcx4 | -0,19 | 0,80121651  | -0,31 | 0,654099591 | -0,08 | 0,947316802 | 1,14  | 0,074540949 | 0,44  | 0,39916841  |
| Armcx5 | 0,67  | 0,280769812 | 0,15  | 0,911024505 | 0,82  | 0,52450618  | -0,76 | 0,195518972 | 0,22  | 0,826389381 |
| Armcx6 | -0,41 | 0,547914659 | 0,33  | 0,733708652 | 0,46  | 0,689058581 | 1,3   | 0,021644799 | 0,73  | 0,292204779 |
| Armt1  | -0,86 | 0,318041432 | -0,01 | 0,996113371 | 0,48  | 0,504482377 | 0,15  | 0,949342852 | -0,15 | 0,952141995 |
| Arnt   | 0,12  | 0,83702976  | 0,04  | 0,964757836 | 0,49  | 0,302861841 | -0,05 | 0,942259386 | -0,05 | 0,953744167 |
| Arnt2  | -0,13 | 0,795481466 | -0,3  | 0,770521007 | 0,14  | 0,865545635 | 0,09  | 0,923119077 | -0,12 | 0,912250982 |
| Arntl  | 0,05  | 0,960720096 | 0,33  | 0,602549494 | -0,22 | 0,849387534 | -1,1  | 0,242691189 | 0,28  | 0,830268209 |
| Arntl2 | 0,3   | 0,706900702 | 0,34  | 0,533804963 | 0,26  | 0,72220454  | 0,95  | 0,22589377  | 0,83  | 0,321751898 |
| Arpc1a | 0,12  | 0,901101215 | -0,05 | 0,945143056 | 0,42  | 0,377987263 | 0,15  | 0,650385638 | -0,05 | 0,952190189 |
| Arpc1b | -0,08 | 0,871717973 | -0,03 | 0,943915456 | 0,02  | 0,985347628 | 0,6   | 0,099090657 | 0,09  | 0,909363599 |
| Arpc2  | 0,02  | 0,976574175 | 0,02  | 0,982786635 | 0,06  | 0,932600584 | 0,16  | 0,673428333 | 0,19  | 0,745574572 |
| Arpc3  | -0,23 | 0,68194299  | 0,06  | 0,910041634 | -0,32 | 0,523654532 | 0,63  | 0,073958223 | 0,35  | 0,524829864 |
| Arpc4  | -0,08 | 0,85617916  | -0,05 | 0,954343854 | 0,25  | 0,702072682 | 0,63  | 0,122555303 | 0,03  | 0,976743304 |
| Arpc5  | -0,39 | 0,382845839 | -0,18 | 0,661734303 | 0,68  | 0,237167284 | 0,49  | 0,262658709 | -0,14 | 0,869148467 |
| Arpc5l | -0,58 | 0,193440782 | -0,18 | 0,66616142  | 0,44  | 0,565500456 | 0,19  | 0,597331286 | 0,05  | 0,955836352 |
| Arpin  | -0,18 | 0,871717973 | 0,18  | 0,89034555  | 0,31  | 0,804576742 | -1,2  | 0,202877508 | -0,52 | 0,378505645 |
| Arpp19 | 0,06  | 0,939308558 | -0,47 | 0,487477927 | 0,14  | 0,817106175 | 0,98  | 0,146784762 | -0,19 | 0,854369491 |
| Arpp21 | -0,02 | 0,984024351 | 0,43  | 0,316289337 | 0     | 0,997268369 | -0,12 | 0,767743609 | 0     | 0,997254437 |
| Arr3   | 0,02  | 0,981308673 | 0,2   | 0,855974935 | -0,05 | 0,970398339 | -0,32 | 0,619079614 | -0,26 | 0,754511071 |
| Arrb1  | -0,05 | 0,909022395 | -0,03 | 0,974159037 | -0,4  | 0,498531839 | 0,8   | 0,094488825 | -0,53 | 0,214056891 |
| Arrb2  | -0,3  | 0,70137787  | -0,58 | 0,410361591 | 0,79  | 0,141461562 | -0,38 | 0,650385638 | -0,56 | 0,450989685 |
| Arrdc1 | -0,59 | 0,109113269 | -0,32 | 0,600177044 | 0,37  | 0,709222239 | 0,32  | 0,569392715 | -0,05 | 0,958856121 |
| Arrdc2 | -0,68 | 0,157853388 | -0,75 | 0,468035796 | 0,47  | 0,661747229 | -0,04 | 0,962616064 | 0,14  | 0,913553402 |
| Arrdc3 | -0,21 | 0,597954095 | -0,16 | 0,836404534 | -0,21 | 0,753966565 | 1,33  | 0,057435078 | -0,2  | 0,832781095 |
| Arrdc4 | 1     | 0,374225652 | 1,61  | 0,077861305 | -1,44 | 0,076696168 | 0,08  | 0,895701762 | 1,23  | 0,021111626 |
| Arrdc5 | 0,02  | 0,974976131 | -0,14 | 0,791549354 | 0,12  | 0,865318296 | 0,05  | 0,926317009 | -0,09 | 0,912145714 |
| Arsa   | 0,04  | 0,960720096 | -0,04 | 0,970135967 | 0,26  | 0,661747229 | 0,73  | 0,171625869 | 0,14  | 0,879075155 |
| Arsb   | -1,05 | 0,14504251  | -1,19 | 0,090425426 | 0,92  | 0,149228124 | -0,63 | 0,399965011 | -1,05 | 0,082468962 |
| Arsg   | 0,04  | 0,963919902 | 0,06  | 0,956504634 | -0,23 | 0,815567598 | 0,44  | 0,350852228 | -0,17 | 0,836061657 |

|          |       |             |       |             |       |             |       |             |       |             |
|----------|-------|-------------|-------|-------------|-------|-------------|-------|-------------|-------|-------------|
| Arsi     | 0,34  | 0,469665838 | 0,04  | 0,932292974 | -0,03 | 0,975686446 | -0,21 | 0,638514768 | -0,03 | 0,976743304 |
| Arsj     | -0,42 | 0,45544471  | -0,15 | 0,850135665 | 0,27  | 0,767317239 | -0,23 | 0,768368149 | -0,5  | 0,563077271 |
| Arsk     | 0,44  | 0,775296013 | 0,34  | 0,803629137 | -0,85 | 0,33075776  | -0,9  | 0,223115921 | -0,15 | 0,928724353 |
| Art1     | -0,01 | 0,996043336 | 0,13  | 0,907410387 | 0,29  | 0,739945591 | -0,25 | 0,656052937 | -0,03 | 0,979152939 |
| Art2a-ps | 0,14  | 0,809560399 | -0,07 | 0,920933203 | -0,38 | 0,576505498 | 0,24  | 0,57879104  | -0,06 | 0,947437555 |
| Art2b    | -0,02 | 0,981889402 | 0,12  | 0,883687585 | -0,07 | 0,936840991 | -0,19 | 0,771294754 | -0,03 | 0,980932608 |
| Art3     | 0,06  | 0,966775766 | 0,27  | 0,503791751 | -0,91 | 0,30134516  | 0,23  | 0,71158821  | 1,18  | 0,051676996 |
| Art4     | 0,01  | 0,984738554 | -0,08 | 0,939289739 | -0,26 | 0,712697139 | -0,61 | 0,260724934 | -0,41 | 0,799510708 |
| Art5     | 0,1   | 0,902127776 | 0,26  | 0,750378621 | -0,01 | 0,993146041 | 0,33  | 0,4435721   | -0,21 | 0,774826589 |
| Artn     | -0,08 | 0,903666411 | 0,13  | 0,932292974 | -0,2  | 0,800162809 | 0,03  | 0,978782666 | -0,3  | 0,697818445 |
| Arv1     | -0,02 | 0,98297164  | 0,1   | 0,944864292 | -0,17 | 0,875486206 | 0,32  | 0,794368434 | 0,34  | 0,840952901 |
| Arvcf    | -0,02 | 0,989316531 | 0,06  | 0,962028658 | 0,05  | 0,96043738  | -0,98 | 0,160911751 | -1,19 | 0,151397408 |
| Arx      | -0,04 | 0,976495648 | 0,08  | 0,901000778 | 0,03  | 0,985093393 | -0,02 | 0,979516321 | 0,18  | 0,799510708 |
| Arxes1   | 0,06  | 0,9231839   | -0,1  | 0,855632384 | 0,03  | 0,968638834 | 0,08  | 0,835797486 | 0,1   | 0,90813354  |
| Arxes2   | 0,49  | 0,6019256   | -0,43 | 0,725783826 | -0,41 | 0,702685484 | 0,4   | 0,577432583 | -0,55 | 0,447019099 |
| As3mt    | -0,33 | 0,593861914 | 0,23  | 0,602549494 | 0,73  | 0,242790302 | -0,02 | 0,979535553 | -0,24 | 0,720432404 |
| Asah1    | -0,11 | 0,786922555 | 0,13  | 0,738762579 | -0,22 | 0,777417583 | -0,41 | 0,395943526 | 0,27  | 0,713632359 |
| Asah2    | -0,17 | 0,761425175 | 0,05  | 0,959685428 | 0,09  | 0,912299263 | -0,11 | 0,80795564  | -0,5  | 0,328082125 |
| Asap1    | 0,09  | 0,898116888 | 0,3   | 0,529278426 | -0,17 | 0,775294502 | -0,2  | 0,684896871 | 0,03  | 0,975889128 |
| Asap2    | -0,21 | 0,721378796 | 0     | 1           | -0,24 | 0,817818413 | -0,3  | 0,560385097 | 0,08  | 0,962872595 |
| Asap3    | -0,51 | 0,422033372 | 0,04  | 0,956555856 | 0,23  | 0,742758388 | 0,25  | 0,773791919 | 0,01  | 0,992406971 |
| Asb1     | -0,24 | 0,648730873 | -0,36 | 0,517288934 | 0,64  | 0,270049721 | -0,5  | 0,254784646 | -0,16 | 0,898309858 |
| Asb10    | -0,49 | 0,189684245 | 0,26  | 0,776548278 | -0,02 | 0,982648972 | -0,38 | 0,37252791  | -0,18 | 0,773996551 |
| Asb11    | 0,15  | 0,764288636 | -0,06 | 0,930849936 | 0,1   | 0,911601881 | 0,2   | 0,758905782 | 0,28  | 0,731865047 |
| Asb12    | 0,12  | 0,818587047 | 0,39  | 0,490814009 | 0,11  | 0,904057901 | -0,13 | 0,891975149 | -0,09 | 0,935006901 |
| Asb13    | 0,14  | 0,833275012 | 0,47  | 0,433699131 | -0,32 | 0,811424918 | -0,6  | 0,305660203 | 0,98  | 0,098490291 |
| Asb14    | -0,09 | 0,903817676 | -0,26 | 0,828818891 | -0,17 | 0,844493581 | 0,24  | 0,52218381  | -0,03 | 0,97425848  |
| Asb15    | -0,06 | 0,944652244 | 0,21  | 0,916338327 | -0,1  | 0,914134206 | -0,08 | 0,923587701 | -0,1  | 0,922086387 |
| Asb16    | -0,11 | 0,821712184 | -0,04 | 0,956504634 | -0,16 | 0,85952125  | 0,23  | 0,684639535 | 0,33  | 0,650995474 |
| Asb17    | 0,14  | 0,762798673 | 0,09  | 0,852719676 | -0,29 | 0,715497532 | 0,25  | 0,498381722 | -0,01 | 0,991628025 |
| Asb17os  | -0,01 | 0,993810522 | 0,17  | 0,912379377 | -0,07 | 0,927986051 | 0,23  | 0,607553507 | 0,29  | 0,726042963 |
| Asb18    | 0     | 1           | -0,33 | 0,474106654 | -0,15 | 0,807786405 | -0,09 | 0,823045201 | 0,1   | 0,926943218 |
| Asb2     | 0,41  | 0,514360833 | -0,07 | 0,925520621 | -0,22 | 0,717387525 | -0,12 | 0,871321071 | -0,14 | 0,888252054 |
| Asb3     | -0,26 | 0,761457464 | 0,1   | 0,924342001 | 1,4   | 0,115278859 | 0,08  | 0,85304807  | 0,28  | 0,574722307 |
| Asb4     | 0,69  | 0,444590242 | 0,61  | 0,214321569 | -0,22 | 0,887429895 | 1,85  | 0,05133893  | 1,67  | 0,049254019 |



|        |       |             |       |             |       |             |       |             |       |             |
|--------|-------|-------------|-------|-------------|-------|-------------|-------|-------------|-------|-------------|
| Asb5   | -0,2  | 0,764288636 | 0,21  | 0,864363741 | -0,03 | 0,97041109  | 0,16  | 0,81442626  | 0,94  | 0,217512582 |
| Asb6   | -0,66 | 0,490830665 | -0,9  | 0,104457339 | 0,04  | 0,982664533 | 0,89  | 0,375052818 | -0,15 | 0,931132966 |
| Asb7   | -0,5  | 0,304072657 | -0,16 | 0,867613043 | 0,18  | 0,841143044 | 0,55  | 0,438757434 | -0,02 | 0,991437885 |
| Asb8   | -0,59 | 0,222236104 | -0,25 | 0,687051869 | 0,24  | 0,70365819  | 0,17  | 0,768880868 | -0,01 | 0,994270272 |
| Asb9   | 0,11  | 0,909022395 | 0,19  | 0,839789639 | 0,07  | 0,95295976  | -0,37 | 0,538165751 | -0,69 | 0,419557334 |
| Ascc1  | -0,26 | 0,586458491 | -0,1  | 0,934294134 | -0,34 | 0,660920525 | -0,39 | 0,25955285  | -0,31 | 0,590196048 |
| Ascc2  | -0,13 | 0,800023642 | -0,05 | 0,957659362 | -0,58 | 0,196670902 | -0,14 | 0,780675133 | -0,22 | 0,752813867 |
| Ascc3  | 0,49  | 0,249740343 | 0,56  | 0,216491969 | -0,22 | 0,814441474 | 0,15  | 0,798441226 | 0,79  | 0,139276863 |
| Ascl1  | -0,01 | 0,98456417  | -0,02 | 0,981475625 | -0,13 | 0,880706627 | 0,11  | 0,835780773 | 0,06  | 0,959573673 |
| Ascl2  | 0,52  | 0,395628811 | -0,07 | 0,903504389 | -0,08 | 0,906275304 | -0,15 | 0,726463293 | 0     | 0,999775166 |
| Ascl3  | -0,14 | 0,778869381 | -0,19 | 0,934294134 | -0,1  | 0,906747817 | -0,3  | 0,908141892 | 0,27  | 0,907046137 |
| Ascl4  | 0,21  | 0,795286609 | 0,05  | 0,964633661 | -0,11 | 0,865148119 | 0,15  | 0,801930792 | -0,05 | 0,961406182 |
| Asf1a  | 0,15  | 0,807246565 | -0,29 | 0,664787536 | -0,23 | 0,758675564 | 0,25  | 0,564245683 | 0,47  | 0,450543672 |
| Asf1b  | -0,84 | 0,208520513 | -1,93 | 0,146075743 | 1,4   | 0,046681909 | 2,92  | 0,006154414 | 0,01  | 0,990935486 |
| Asgr1  | 0,03  | 0,976574175 | -0,22 | 0,862079816 | -0,03 | 0,979569273 | 0,39  | 0,427171447 | 0,07  | 0,939948423 |
| Asgr2  | 0,04  | 0,969486005 | -0,17 | 0,882847123 | -0,09 | 0,901071918 | -0,36 | 0,362347224 | -0,07 | 0,957010996 |
| Ash1l  | 0,24  | 0,663447662 | 0,19  | 0,695823136 | 0,2   | 0,75128761  | -0,27 | 0,580120569 | 0,14  | 0,879075155 |
| Ash2l  | -0,29 | 0,53997031  | -0,07 | 0,935984823 | 1,13  | 0,211244596 | 0,31  | 0,740434535 | -0,11 | 0,939667345 |
| Asic1  | -0,29 | 0,546019769 | -0,01 | 0,999951794 | -0,09 | 0,88128606  | 0,37  | 0,289958384 | 0,2   | 0,735052158 |
| Asic2  | -0,08 | 0,898572877 | 0,22  | 0,783487161 | 0,03  | 0,974227544 | 0,29  | 0,589132295 | -0,01 | 0,992890723 |
| Asic3  | -0,07 | 0,928344482 | -0,09 | 0,932390453 | 0,08  | 0,908332409 | -0,83 | 0,231923386 | -0,39 | 0,728578071 |
| Asic4  | -0,2  | 0,762165257 | -0,08 | 0,902830091 | -0,01 | 0,993379272 | 0,06  | 0,904080014 | 0,01  | 0,989016067 |
| Asic5  | 0,25  | 0,508688727 | -0,11 | 0,824372931 | -0,08 | 0,932866273 | 0,31  | 0,477503193 | 0,14  | 0,89529118  |
| Asl    | -0,69 | 0,409977631 | -0,18 | 0,825210924 | -0,21 | 0,856605654 | 0,62  | 0,382504768 | 0,24  | 0,7911784   |
| Asmt   | 0,22  | 0,794097262 | 0     | 1           | 0,13  | 0,817780561 | 0,09  | 0,851024901 | -0,34 | 0,618620818 |
| Asna1  | -0,01 | 0,982165888 | -0,03 | 0,979551751 | -0,04 | 0,978877446 | 0,26  | 0,504754586 | -0,16 | 0,792346596 |
| Asns   | 0,64  | 0,157853388 | 0,56  | 0,286881805 | -0,15 | 0,85431991  | 1,65  | 0,013724651 | 2,26  | 0,003093895 |
| Asnsd1 | -0,24 | 0,778869381 | -0,48 | 0,567985291 | 0,57  | 0,416568861 | 0,71  | 0,280695943 | -0,09 | 0,973382116 |
| Aspa   | -0,47 | 0,580909375 | -0,25 | 0,650621274 | -0,11 | 0,946267064 | -0,17 | 0,61105561  | 0,77  | 0,303013355 |
| Aspdh  | 0,81  | 0,459989765 | 0,04  | 0,948409105 | 0,34  | 0,492393393 | -0,12 | 0,836277934 | -0,41 | 0,551972106 |
| Aspg   | 0,01  | 0,991514562 | -0,01 | 0,996069467 | -0,01 | 0,993379272 | -0,07 | 0,936549959 | -0,33 | 0,70189716  |
| Asph   | -0,11 | 0,881803092 | -0,32 | 0,51825831  | 0,21  | 0,801755243 | -0,62 | 0,429684199 | 0,52  | 0,537706015 |
| Asphd1 | 0,21  | 0,701391957 | -0,32 | 0,505089058 | 0,18  | 0,715497532 | 0,23  | 0,619611108 | 0,1   | 0,929297544 |
| Asphd2 | 0,46  | 0,279386788 | 0,21  | 0,690317074 | -0,16 | 0,870263371 | 0,18  | 0,80174822  | -0,15 | 0,861977667 |
| Aspm   | -1,15 | 0,074890017 | -1,04 | 0,178138688 | 1,2   | 0,203107553 | 1,56  | 0,015457806 | 0,02  | 0,980945466 |

|          |       |             |       |             |       |             |       |             |       |             |
|----------|-------|-------------|-------|-------------|-------|-------------|-------|-------------|-------|-------------|
| Aspn     | -0,5  | 0,827055517 | 0,53  | 0,772036397 | -0,14 | 0,864598204 | -2,17 | 0,073275727 | 0,49  | 0,668607331 |
| Asprv1   | 0,25  | 0,603330883 | 0,36  | 0,459231649 | -0,1  | 0,950846671 | -0,29 | 0,690229649 | -0,14 | 0,89529118  |
| Aspscr1  | -0,13 | 0,776721795 | 0,08  | 0,945920068 | 0,51  | 0,353905777 | 0,22  | 0,75485675  | -0,23 | 0,801385411 |
| Asrgl1   | -0,38 | 0,559910758 | -0,31 | 0,900801202 | 0,1   | 0,94930407  | -1,45 | 0,207023714 | -0,33 | 0,787304651 |
| Aste1    | 0,9   | 0,087910462 | 0,54  | 0,493580894 | 0,14  | 0,909963525 | -0,4  | 0,304512629 | 0,49  | 0,555864261 |
| Astl     | 1,13  | 0,121261083 | 0,38  | 0,589051408 | 0,08  | 0,943788892 | 0,73  | 0,122308247 | 0,16  | 0,810820885 |
| Astn1    | 0,11  | 0,869565514 | 0,26  | 0,699652464 | -0,1  | 0,901410016 | -0,65 | 0,276093686 | -0,36 | 0,600332767 |
| Astn2    | 0,19  | 0,822613889 | 0,12  | 0,808708576 | -0,13 | 0,833493578 | -0,02 | 0,966322744 | 0,17  | 0,82840392  |
| Astx3    | 0,08  | 0,944969851 | 0,05  | 0,915265253 | -0,24 | 0,77857305  | 0,31  | 0,448106246 | 0,25  | 0,674381312 |
| Astx6    | -0,6  | 0,397054492 | -0,55 | 0,486279052 | -0,3  | 0,548599327 | -0,04 | 0,937742175 | -0,13 | 0,878419072 |
| Asun     | 0,02  | 0,978853388 | -0,01 | 0,988922072 | 0,21  | 0,766234611 | -0,23 | 0,659819838 | -0,28 | 0,668747774 |
| Asxl1    | -0,18 | 0,808947569 | 0,03  | 0,974580396 | 0,11  | 0,939026015 | 0,43  | 0,313652591 | 0,12  | 0,930575749 |
| Asxl2    | -0,26 | 0,515770167 | 0,03  | 0,9860901   | -0,08 | 0,944497706 | -0,16 | 0,826418045 | -0,28 | 0,728483022 |
| Asxl3    | 0     | 0,998210173 | -0,09 | 0,932292974 | 0,49  | 0,555443611 | -1,16 | 0,156217103 | 0,06  | 0,968952017 |
| Asz1     | 0,24  | 0,695932247 | 0,4   | 0,526459535 | -0,01 | 0,99444437  | -0,2  | 0,774647829 | -0,11 | 0,934185668 |
| Atad1    | -0,18 | 0,752654071 | 0     | 1           | 0,15  | 0,869115866 | 0,13  | 0,951235707 | 0,95  | 0,478404767 |
| Atad2    | -0,74 | 0,455714377 | -0,47 | 0,627386884 | 1,15  | 0,206505714 | 1,41  | 0,172314351 | -0,06 | 0,973428839 |
| Atad2b   | -0,12 | 0,908796202 | -0,21 | 0,842663656 | 0,05  | 0,963221639 | 0,19  | 0,761031448 | 0,06  | 0,949178165 |
| Atad3a   | -0,82 | 0,206370928 | -0,53 | 0,397833962 | 0,55  | 0,573669385 | 0,56  | 0,357869114 | -0,12 | 0,923040447 |
| Atad3aos | -0,41 | 0,489042022 | 0,24  | 0,589281517 | 0,14  | 0,887630371 | -1,13 | 0,044757829 | -0,21 | 0,752900829 |
| Atad5    | -0,73 | 0,194613044 | -0,02 | 0,9951682   | 0,68  | 0,492721892 | 0,42  | 0,695515516 | -0,14 | 0,913097962 |
| Atat1    | 0,34  | 0,521669024 | -0,02 | 0,984006421 | -0,28 | 0,609745487 | -0,17 | 0,789516436 | -0,06 | 0,957130917 |
| Atcay    | -0,6  | 0,437618775 | -0,03 | 0,992175086 | 0     | 0,998779926 | 0,25  | 0,736730464 | 0,4   | 0,661829904 |
| Atcayos  | -0,11 | 0,882119027 | 0,26  | 0,832834655 | 0,08  | 0,921956183 | -0,64 | 0,555564163 | -0,63 | 0,571269331 |
| Ate1     | -0,28 | 0,593510013 | -0,12 | 0,901688898 | 0,37  | 0,665727181 | -0,25 | 0,831764227 | -0,23 | 0,864292286 |
| Atf1     | 0,3   | 0,670731389 | 0,17  | 0,843162191 | 0,6   | 0,326707568 | -0,73 | 0,146784762 | -0,13 | 0,867093565 |
| Atf2     | 0,05  | 0,950532575 | 0,35  | 0,414880247 | 0,34  | 0,744899116 | -0,21 | 0,720275463 | 0,47  | 0,495345787 |
| Atf3     | 0,15  | 0,787452068 | 0,53  | 0,231499374 | -0,13 | 0,856218874 | -0,14 | 0,715808932 | 0,43  | 0,354221316 |
| Atf4     | 0,51  | 0,161661656 | 0,5   | 0,394704573 | -0,43 | 0,412643917 | -0,17 | 0,734034893 | 0,51  | 0,297779648 |
| Atf5     | 0,37  | 0,577287933 | 0,19  | 0,718810401 | -0,31 | 0,579926336 | -0,21 | 0,647220477 | -0,05 | 0,968130547 |
| Atf6     | 0,01  | 0,989017567 | 0,1   | 0,873601941 | -0,15 | 0,785676028 | 0,34  | 0,332246461 | 0,2   | 0,755066705 |
| Atf6b    | -0,6  | 0,290377514 | -0,37 | 0,704389345 | 0,4   | 0,395340836 | -0,22 | 0,696843539 | -0,59 | 0,271713687 |
| Atf7     | -0,48 | 0,471753362 | -0,28 | 0,625875078 | 0,08  | 0,939590181 | -0,25 | 0,658373543 | -0,17 | 0,844407367 |
| Atf7ip   | 0     | 0,996998625 | 0,08  | 0,88741189  | 0,11  | 0,925365058 | -0,26 | 0,466203005 | -0,01 | 0,990633766 |
| Atf7ip2  | -0,02 | 0,970268108 | 0,45  | 0,467853942 | -0,02 | 0,987003605 | -0,38 | 0,441112475 | -0,32 | 0,662758219 |

|         |       |             |       |             |       |             |       |             |       |             |
|---------|-------|-------------|-------|-------------|-------|-------------|-------|-------------|-------|-------------|
| Atg10   | -0,36 | 0,63934846  | 1,14  | 0,393560091 | 0,1   | 0,94930407  | -0,87 | 0,039380954 | 0,21  | 0,773125975 |
| Atg101  | 0,21  | 0,635313145 | 0,07  | 0,884434898 | 0,28  | 0,825782434 | 0,21  | 0,664457643 | -0,49 | 0,335679372 |
| Atg12   | 0,38  | 0,358570801 | -0,19 | 0,880473303 | 0,14  | 0,906275304 | -0,13 | 0,879532647 | -0,13 | 0,869403669 |
| Atg13   | -0,31 | 0,520948125 | 0,15  | 0,826722506 | 0,45  | 0,451210623 | -0,24 | 0,800899563 | -0,29 | 0,784939247 |
| Atg14   | -0,31 | 0,754348172 | 0,41  | 0,390751508 | -0,11 | 0,906097666 | -0,23 | 0,825899927 | -0,16 | 0,909363599 |
| Atg16l1 | -0,41 | 0,501682835 | -0,36 | 0,516048664 | 0,28  | 0,774412908 | 0,79  | 0,349309585 | 0,1   | 0,947559952 |
| Atg16l2 | -0,17 | 0,822107047 | 0,07  | 0,934602811 | 0,27  | 0,712697139 | -0,33 | 0,673131686 | -0,07 | 0,958259949 |
| Atg2a   | 0,04  | 0,944311955 | 0,08  | 0,912394814 | 0,2   | 0,809137779 | -0,03 | 0,958056332 | -0,67 | 0,21219118  |
| Atg2b   | -0,16 | 0,786654245 | -0,59 | 0,308187511 | 0,35  | 0,637896954 | 0,45  | 0,43355222  | -0,28 | 0,745574572 |
| Atg3    | 0     | 0,998449912 | 0     | 0,999395995 | 0,03  | 0,973186233 | -0,03 | 0,964115527 | 0,25  | 0,732679577 |
| Atg4a   | -0,42 | 0,306829062 | 0,05  | 0,968851247 | 0,16  | 0,823683141 | -0,65 | 0,393737712 | -0,39 | 0,652437121 |
| Atg4b   | -0,53 | 0,264937591 | -0,03 | 0,97499093  | -0,01 | 0,993379272 | -0,28 | 0,549326509 | -0,38 | 0,447019099 |
| Atg4c   | -0,36 | 0,796082921 | -0,94 | 0,371529423 | -0,53 | 0,470938481 | 0,83  | 0,345529914 | 0,8   | 0,420470441 |
| Atg4d   | 0,01  | 0,991919022 | -0,24 | 0,729880381 | 0,29  | 0,738804472 | -0,26 | 0,5508774   | -0,31 | 0,570044827 |
| Atg5    | 0     | 0,999041198 | -0,43 | 0,478589292 | -0,08 | 0,940489823 | 0,18  | 0,696558026 | -0,2  | 0,827979441 |
| Atg7    | -0,06 | 0,933969365 | -0,5  | 0,357085199 | -0,41 | 0,508823731 | 0,14  | 0,717305989 | -0,56 | 0,39916841  |
| Atg9a   | -0,33 | 0,730710327 | -0,44 | 0,614233457 | 0,92  | 0,076696168 | -0,02 | 0,981631718 | -0,59 | 0,282689685 |
| Atg9b   | -0,89 | 0,241021853 | -0,61 | 0,213731156 | 1,05  | 0,079577415 | 0,31  | 0,641461166 | -0,07 | 0,956610289 |
| Athl1   | 0,04  | 0,978347418 | 0,6   | 0,514920042 | 0,2   | 0,85952125  | -1,57 | 0,159846013 | 0,07  | 0,970154126 |
| Atic    | -0,78 | 0,236944071 | -0,81 | 0,153524445 | 0,59  | 0,565632648 | 1,81  | 0,024799147 | -0,14 | 0,928724353 |
| Atl1    | -0,83 | 0,461113298 | 0,13  | 0,946599376 | 0,63  | 0,264436932 | 0,13  | 0,893841279 | -0,69 | 0,292707282 |
| Atl2    | -0,24 | 0,706208727 | 0,11  | 0,842663656 | 0,25  | 0,740346788 | -0,93 | 0,141647436 | -0,13 | 0,902484718 |
| Atl3    | -0,9  | 0,47606703  | 0     | 0,998504901 | 0,46  | 0,470938481 | 0,04  | 0,970897388 | -0,21 | 0,869675527 |
| Atm     | -0,5  | 0,568473441 | -0,07 | 0,934583827 | 0,51  | 0,568619313 | 0,11  | 0,922740736 | -0,19 | 0,885777129 |
| Atmin   | -0,56 | 0,329577496 | 0,08  | 0,86198859  | 0,47  | 0,340783964 | 0,27  | 0,536344767 | -0,01 | 0,9939542   |
| Atn1    | -0,52 | 0,52707495  | 0,02  | 0,988548122 | 0,14  | 0,862480223 | 0,17  | 0,73934834  | 0,19  | 0,845667625 |
| Atoh1   | 0     | 0,997486729 | 0,09  | 0,888759454 | -0,12 | 0,922318683 | 0,16  | 0,690442683 | 0,34  | 0,681187459 |
| Atoh7   | -0,18 | 0,634129153 | -0,01 | 0,98504146  | -0,04 | 0,953292736 | -0,07 | 0,883783927 | 0,01  | 0,988084587 |
| Atoh8   | 0,06  | 0,940822026 | -0,01 | 0,995205602 | -0,66 | 0,419845061 | -0,08 | 0,970768272 | 0,78  | 0,601481833 |
| Atox1   | -0,17 | 0,68225825  | -0,4  | 0,369646462 | 0,36  | 0,413379282 | 0,21  | 0,588576174 | -0,35 | 0,452376077 |
| Atp10a  | 0,03  | 0,972736855 | 0     | 1           | 0,52  | 0,502965724 | -1,04 | 0,149394025 | 0,21  | 0,842793141 |
| Atp10b  | 0,23  | 0,714662474 | 0,29  | 0,841184864 | 0,6   | 0,471873683 | -0,65 | 0,296435377 | -0,45 | 0,570939418 |
| Atp10d  | 0,11  | 0,948926586 | 0,45  | 0,582478031 | -0,61 | 0,435556279 | -0,2  | 0,674464701 | 0,96  | 0,061793369 |
| Atp11a  | -0,15 | 0,755100499 | 0,06  | 0,934480412 | -0,41 | 0,509774432 | 0,08  | 0,889835466 | -0,38 | 0,498598092 |
| Atp11b  | 0,34  | 0,557995141 | 0,62  | 0,317755212 | 0,05  | 0,968008918 | 0,27  | 0,522511755 | 0,17  | 0,823098095 |

|           |       |             |       |             |       |             |       |             |       |             |
|-----------|-------|-------------|-------|-------------|-------|-------------|-------|-------------|-------|-------------|
| Atp11c    | 0,04  | 0,947630317 | 0,36  | 0,646170664 | -0,21 | 0,823823322 | -0,7  | 0,267397453 | 0,47  | 0,551972106 |
| Atp12a    | -0,13 | 0,803737003 | -0,02 | 0,970832543 | 0,03  | 0,971100209 | -0,15 | 0,797527363 | 0,02  | 0,986849867 |
| Atp13a1   | -0,51 | 0,377549804 | 0,54  | 0,366553312 | 0,08  | 0,940982335 | -0,21 | 0,718299331 | 0,17  | 0,813490069 |
| Atp13a2   | -0,19 | 0,905414735 | -0,05 | 0,949201983 | -0,09 | 0,946893165 | 0,03  | 0,983000881 | 0,07  | 0,960108878 |
| Atp13a3   | 0,51  | 0,242729396 | 0,7   | 0,162405391 | -0,34 | 0,663029337 | 0,07  | 0,945619692 | 0,4   | 0,600537288 |
| Atp13a4   | -0,45 | 0,355690795 | -0,18 | 0,855632384 | -0,05 | 0,959650277 | 0,29  | 0,646589882 | 0,01  | 0,9969305   |
| Atp13a5   | -0,34 | 0,673270664 | -0,12 | 0,857386929 | -0,08 | 0,923135714 | 0,06  | 0,944602937 | -0,04 | 0,978604922 |
| Atp1a1    | -0,02 | 0,966775766 | -0,16 | 0,712500402 | 0,44  | 0,427338848 | -0,12 | 0,80396214  | -0,04 | 0,96439553  |
| Atp1a2    | -0,08 | 0,970938013 | 0,3   | 0,829892665 | -0,32 | 0,823823322 | -1,47 | 0,026972102 | -1,32 | 0,188623626 |
| Atp1a3    | -0,21 | 0,764288636 | -0,49 | 0,664787536 | 0,19  | 0,841563482 | -0,05 | 0,952162883 | 0,03  | 0,981913783 |
| Atp1a4    | -0,15 | 0,815649066 | -0,1  | 0,933320126 | 0,06  | 0,963357998 | 0,74  | 0,300989263 | 0,47  | 0,486097511 |
| Atp1b1    | -0,39 | 0,332488001 | 0,16  | 0,873107937 | 0,88  | 0,337509636 | -2,38 | 0,413553771 | 0,2   | 0,952141995 |
| Atp1b2    | -0,67 | 0,59710379  | -0,09 | 0,897574732 | 0,24  | 0,868497826 | -2,35 | 0,011690384 | -1,57 | 0,026270409 |
| Atp1b3    | -0,06 | 0,918945711 | -0,09 | 0,842663656 | -0,26 | 0,714762936 | 0,56  | 0,421989207 | 0,74  | 0,335679372 |
| Atp1b4    | -0,25 | 0,648798662 | -0,22 | 0,903089182 | -0,21 | 0,727262258 | 0,3   | 0,737607953 | -0,04 | 0,961749007 |
| Atp2a1    | -0,24 | 0,856959665 | 0,13  | 0,932390453 | 0,09  | 0,940550094 | -0,24 | 0,7327433   | -0,52 | 0,295414542 |
| Atp2a2    | -0,39 | 0,252887273 | -0,09 | 0,925359981 | 0,31  | 0,558381363 | -0,2  | 0,6439398   | -0,02 | 0,983469081 |
| Atp2a3    | -0,26 | 0,772855197 | -0,12 | 0,914962572 | 0,36  | 0,631855861 | -3,81 | 0,003863434 | -1,15 | 0,05100134  |
| Atp2b1    | -0,02 | 0,978017159 | 0,21  | 0,595173657 | 0,01  | 0,991121051 | 0,18  | 0,71622756  | 0,16  | 0,836697963 |
| Atp2b2    | 0,02  | 0,983663467 | 0,2   | 0,715348909 | -0,07 | 0,943571321 | -1,51 | 0,018041423 | -0,36 | 0,58512161  |
| Atp2b3    | 0,19  | 0,879350261 | -0,48 | 0,605851161 | -0,17 | 0,837156771 | 0,53  | 0,388229379 | 0,07  | 0,965244101 |
| Atp2b4    | -1,17 | 0,33226893  | -1,47 | 0,100303734 | 0,75  | 0,411208684 | -0,35 | 0,484166794 | -1,3  | 0,050495377 |
| Atp2c1    | 0,06  | 0,942440481 | 0,08  | 0,910013125 | 0,44  | 0,470538686 | -0,6  | 0,122878937 | 0,06  | 0,953585538 |
| Atp2c2    | 0,47  | 0,461113298 | -0,1  | 0,923174593 | 0,25  | 0,760930184 | 0,39  | 0,6292184   | 0,1   | 0,932268703 |
| Atp4a     | 0,12  | 0,832947001 | 0,06  | 0,952352299 | -0,39 | 0,457506381 | -0,02 | 0,985105116 | -0,08 | 0,946155238 |
| Atp4b     | 0,15  | 0,770394365 | -0,13 | 0,901410401 | 0,42  | 0,323768621 | -0,02 | 0,971100918 | 0,23  | 0,692178867 |
| Atp5a1    | -0,41 | 0,286967047 | -0,38 | 0,353649732 | 0,58  | 0,292557534 | 0,61  | 0,122878937 | 0,09  | 0,921903839 |
| Atp5b     | -0,28 | 0,422033372 | -0,25 | 0,523627609 | 0,53  | 0,278260113 | 0,31  | 0,468765073 | -0,05 | 0,956901602 |
| Atp5c1    | 0,23  | 0,724489935 | 0,1   | 0,943915456 | 0,18  | 0,830336321 | -0,03 | 0,980724248 | -0,06 | 0,974553568 |
| Atp5c1-ps | 0,62  | 0,222262142 | -0,57 | 0,333537535 | -0,11 | 0,894339966 | 0,45  | 0,308136957 | 0,01  | 0,991206114 |
| Atp5d     | 0,14  | 0,758067417 | -0,29 | 0,456323011 | 0,57  | 0,296820624 | 0,27  | 0,665832473 | -0,17 | 0,844213516 |
| Atp5e     | 0,12  | 0,811332828 | -0,05 | 0,9381453   | 0,44  | 0,526901752 | 0,56  | 0,185796276 | 0,01  | 0,986849867 |
| Atp5f1    | -0,11 | 0,861297634 | -0,18 | 0,692810551 | -0,28 | 0,601500839 | 0,71  | 0,122878937 | 0,32  | 0,583279373 |
| Atp5g1    | -0,03 | 0,98225675  | -0,16 | 0,808498635 | 0     | 0,997268369 | 0,09  | 0,911611841 | -0,11 | 0,932846086 |
| Atp5g2    | -0,06 | 0,923180948 | -0,18 | 0,67874014  | 0,29  | 0,61212685  | 0,2   | 0,66396234  | -0,29 | 0,706086004 |

|          |       |             |       |             |       |             |       |             |       |             |
|----------|-------|-------------|-------|-------------|-------|-------------|-------|-------------|-------|-------------|
| Atp5g3   | -0,4  | 0,299107037 | -0,14 | 0,834428925 | 0,32  | 0,51912977  | 0,48  | 0,202960417 | 0,27  | 0,600086602 |
| Atp5h    | 0,06  | 0,902360903 | -0,05 | 0,9369583   | 0,44  | 0,329525512 | 0,04  | 0,950563899 | -0,03 | 0,975441362 |
| Atp5j    | 0,2   | 0,644811155 | 0,03  | 0,958974534 | 0,03  | 0,981707295 | 0,11  | 0,773756106 | 0,08  | 0,910507369 |
| Atp5k    | 0,04  | 0,960887583 | -0,31 | 0,565639972 | 0,05  | 0,973000462 | 0,75  | 0,132238421 | -0,41 | 0,574722307 |
| Atp5l    | 0,05  | 0,925460743 | -0,1  | 0,849211072 | 0,17  | 0,736154599 | 0,19  | 0,613304675 | -0,08 | 0,904836805 |
| Atp5s    | 0,33  | 0,770528465 | -0,81 | 0,360136287 | 0,12  | 0,952005428 | 0,47  | 0,45422519  | -0,11 | 0,947437555 |
| Atp5sl   | 0,02  | 0,981669483 | -0,01 | 0,992017084 | 0,06  | 0,974887915 | -0,08 | 0,839256491 | -0,03 | 0,975441362 |
| Atp6ap1  | -0,01 | 0,986382476 | -0,33 | 0,543900329 | 0,25  | 0,689480832 | -0,28 | 0,452631406 | -0,12 | 0,8597045   |
| Atp6ap11 | -0,24 | 0,702313432 | -0,09 | 0,880597826 | -0,18 | 0,879127552 | 0,75  | 0,304619829 | -0,13 | 0,865258929 |
| Atp6ap2  | -0,13 | 0,801665973 | 0,33  | 0,589281517 | 0,41  | 0,657277431 | -1,08 | 0,046121729 | 0,16  | 0,836898158 |
| Atp6v0a1 | -0,3  | 0,575746847 | -0,29 | 0,651942972 | 0,78  | 0,490489841 | -0,05 | 0,942739047 | -0,7  | 0,149017743 |
| Atp6v0a2 | -0,57 | 0,261843547 | -0,23 | 0,716668427 | 0,4   | 0,62103113  | 0,49  | 0,300900254 | -0,04 | 0,974553568 |
| Atp6v0a4 | 0,05  | 0,949144327 | -0,11 | 0,929289366 | -0,46 | 0,370554673 | -0,35 | 0,768796094 | 0,12  | 0,95154963  |
| Atp6v0b  | 0,51  | 0,287459734 | 0,43  | 0,493391321 | -0,57 | 0,326971869 | -0,76 | 0,086968945 | 0,15  | 0,85938715  |
| Atp6v0c  | -0,03 | 0,966145098 | 0,05  | 0,926157704 | 0,06  | 0,939684708 | 0,38  | 0,269556487 | 0,11  | 0,897038698 |
| Atp6v0d1 | -0,07 | 0,922118639 | -0,23 | 0,677981098 | -0,26 | 0,816081776 | 0,27  | 0,604706394 | -0,11 | 0,904836805 |
| Atp6v0d2 | 0,08  | 0,907844906 | -0,27 | 0,713825982 | -0,08 | 0,901032944 | 0,13  | 0,845966819 | 0,12  | 0,883592868 |
| Atp6v0e  | 0,12  | 0,827896405 | -0,07 | 0,89545828  | 0,36  | 0,641366948 | 0,19  | 0,810980147 | -0,25 | 0,765809384 |
| Atp6v0e2 | 0,11  | 0,91803437  | 0,13  | 0,832460257 | -0,49 | 0,377624172 | -1,52 | 0,231598803 | -0,37 | 0,825680274 |
| Atp6v1a  | -0,35 | 0,43904576  | -0,02 | 0,980549664 | 0,24  | 0,772883091 | 0,73  | 0,139123694 | 0,13  | 0,884248437 |
| Atp6v1b1 | -0,04 | 0,963914207 | 0,23  | 0,702517334 | -0,25 | 0,709846532 | -0,36 | 0,394279742 | -0,03 | 0,979456872 |
| Atp6v1b2 | -0,05 | 0,94881239  | 0,46  | 0,280779553 | 0,09  | 0,939963707 | 0,03  | 0,980359749 | 0,21  | 0,843351909 |
| Atp6v1c1 | 0,27  | 0,739638841 | -0,06 | 0,965147491 | -0,85 | 0,27037497  | -0,31 | 0,57819548  | 0,07  | 0,930287169 |
| Atp6v1c2 | -0,08 | 0,929129568 | -0,26 | 0,823987654 | -0,34 | 0,570233796 | 0,21  | 0,524105498 | -0,34 | 0,597080822 |
| Atp6v1d  | 0,34  | 0,546166185 | 0,59  | 0,2014299   | -0,73 | 0,24320522  | -0,25 | 0,674846812 | 0,78  | 0,190971132 |
| Atp6v1e1 | 0,19  | 0,680794685 | 0,1   | 0,880473303 | -0,18 | 0,804607903 | 0,1   | 0,888599451 | 0,43  | 0,506874725 |
| Atp6v1e2 | 0,03  | 0,969577981 | -0,19 | 0,677000136 | -0,02 | 0,982664533 | 0,24  | 0,48505774  | -0,12 | 0,880552266 |
| Atp6v1g1 | 0,1   | 0,828332985 | 0,11  | 0,870380105 | 0,11  | 0,872968292 | 0,5   | 0,254784646 | 0,31  | 0,590396118 |
| Atp6v1g2 | -0,63 | 0,390708496 | 0,29  | 0,868234125 | 0,35  | 0,658724614 | 0,37  | 0,698748695 | 0,14  | 0,885872093 |
| Atp6v1g3 | -0,06 | 0,947175493 | -0,1  | 0,887493001 | -0,22 | 0,713314296 | 0,25  | 0,694368504 | 0,05  | 0,971975122 |
| Atp6v1h  | 0,12  | 0,866609637 | 0,4   | 0,470517622 | 0     | 0,997581017 | 0,1   | 0,935478757 | 0,14  | 0,925858284 |
| Atp7a    | -0,08 | 0,93190403  | 0,34  | 0,459417799 | -0,16 | 0,860094776 | 0,66  | 0,129233305 | 1,21  | 0,053074184 |
| Atp7b    | 0,1   | 0,935607349 | 0,18  | 0,852719676 | -0,49 | 0,236638242 | 0,15  | 0,857672322 | -0,06 | 0,964033368 |
| Atp8a1   | 0,31  | 0,483395607 | 0,1   | 0,859223551 | -0,27 | 0,714893141 | -1,5  | 0,076138952 | 0,23  | 0,842079755 |
| Atp8a2   | 0,28  | 0,565823399 | 0,16  | 0,768690422 | 0,2   | 0,8290371   | -0,2  | 0,690223391 | 0,05  | 0,973026298 |

|            |       |             |       |             |       |             |       |             |       |             |
|------------|-------|-------------|-------|-------------|-------|-------------|-------|-------------|-------|-------------|
| Atp8b1     | 0,46  | 0,226511547 | 0,33  | 0,671319666 | -0,27 | 0,599648113 | 2,38  | 0,006593374 | -0,52 | 0,313142021 |
| Atp8b2     | -0,29 | 0,514370213 | 0,49  | 0,227702012 | -0,12 | 0,884597715 | 0,77  | 0,051245222 | 0,47  | 0,335236545 |
| Atp8b3     | 0,45  | 0,469692532 | 0,06  | 0,941751202 | -0,05 | 0,966965904 | -0,05 | 0,953228555 | -0,08 | 0,936841734 |
| Atp8b4     | -0,06 | 0,936611783 | 0,01  | 0,999395995 | -0,29 | 0,868806739 | 0     | 1           | -0,2  | 0,874554354 |
| Atp8b5     | -0,36 | 0,68558206  | 0,2   | 0,891930795 | -0,26 | 0,654328013 | -0,04 | 0,957432042 | -0,42 | 0,43624048  |
| Atp9a      | -0,8  | 0,287459734 | -0,77 | 0,354667412 | 0,32  | 0,727938217 | 0,35  | 0,525248327 | -0,51 | 0,4940585   |
| Atp9b      | 0,29  | 0,539953121 | -0,14 | 0,871595298 | -0,21 | 0,826526709 | 0,34  | 0,671576377 | 0,28  | 0,803980674 |
| Atpaf1     | -0,4  | 0,652819827 | -0,12 | 0,897867961 | -0,09 | 0,935384072 | 0,02  | 0,979212436 | -0,42 | 0,414033358 |
| Atpaf2     | -0,64 | 0,247254947 | -0,25 | 0,6547161   | 0,6   | 0,464354581 | -0,5  | 0,353797054 | -0,58 | 0,361715831 |
| Atpif1     | -0,38 | 0,311316821 | -0,62 | 0,17827498  | 0,77  | 0,092184596 | 0,86  | 0,115358142 | -0,01 | 0,992607235 |
| Atr        | -1,13 | 0,214430522 | -0,39 | 0,605851161 | 0,65  | 0,447140999 | 0,33  | 0,514790164 | -0,03 | 0,96738578  |
| Atraid     | -0,08 | 0,864400092 | -0,06 | 0,964757836 | 0,36  | 0,576939208 | -0,67 | 0,127103549 | -0,27 | 0,639021453 |
| Atrip      | -0,69 | 0,333403216 | -0,19 | 0,763005394 | -0,11 | 0,883534784 | -0,24 | 0,655334071 | -0,45 | 0,442579293 |
| Atrn       | -0,61 | 0,492894586 | -0,29 | 0,677000136 | 0,65  | 0,415635321 | -0,2  | 0,720107733 | -0,16 | 0,86811326  |
| Atrnl1     | -0,4  | 0,476595145 | -0,14 | 0,764299173 | 0,31  | 0,665727181 | 0,44  | 0,376631277 | -0,55 | 0,316401979 |
| Atrx       | 0,43  | 0,387870168 | 0,33  | 0,701043773 | -0,01 | 0,994130625 | 0,47  | 0,183195004 | 0,34  | 0,555864261 |
| Atxn1      | -0,06 | 0,915306261 | -0,12 | 0,860629851 | -0,01 | 0,99407001  | -0,15 | 0,675042385 | -0,26 | 0,635612479 |
| Atxn10     | -0,54 | 0,377974891 | 0,13  | 0,845351675 | 0,69  | 0,145322964 | 0,08  | 0,953756227 | -0,08 | 0,95539912  |
| Atxn11     | -0,13 | 0,86274599  | -0,32 | 0,46025541  | 0,01  | 0,991568687 | 0,28  | 0,60893729  | 0,09  | 0,927536545 |
| Atxn2      | -0,32 | 0,601038547 | -0,3  | 0,481171271 | 0,13  | 0,862869965 | 0,16  | 0,678790333 | -0,04 | 0,968038677 |
| Atxn2l     | -0,02 | 0,97114796  | 0,09  | 0,909735125 | -0,07 | 0,932866273 | -0,12 | 0,778212842 | -0,07 | 0,933759514 |
| Atxn3      | -0,37 | 0,413781809 | -0,11 | 0,892727342 | 0,75  | 0,269852927 | 1     | 0,305400624 | -0,33 | 0,826492226 |
| Atxn7      | 0,32  | 0,489042022 | 0,31  | 0,508633526 | -0,39 | 0,329525512 | 0,09  | 0,866054559 | 0,18  | 0,823098095 |
| Atxn7l1    | 1,15  | 0,077012562 | 1,25  | 0,109267475 | -0,97 | 0,278260113 | -0,46 | 0,337568585 | -0,01 | 0,991980521 |
| Atxn7l1os1 | 0,55  | 0,373974741 | -0,13 | 0,773969614 | -0,18 | 0,727262258 | 0     | 0,997598211 | -0,13 | 0,869113953 |
| Atxn7l1os2 | 0,15  | 0,850962002 | -0,35 | 0,421720178 | -0,36 | 0,628427952 | 0,64  | 0,181651374 | 0,42  | 0,572917283 |
| Atxn7l2    | -0,26 | 0,780020938 | -0,15 | 0,918694468 | 0,31  | 0,762549825 | -0,19 | 0,759918031 | -0,82 | 0,357561487 |
| Atxn7l3    | -0,11 | 0,879743728 | 0,24  | 0,716668427 | 0,1   | 0,931088475 | 0,5   | 0,313701653 | 0,36  | 0,581626555 |
| Atxn7l3b   | -0,41 | 0,512599573 | 0,06  | 0,943915456 | -0,19 | 0,804012085 | 0,03  | 0,967405057 | -0,1  | 0,937446198 |
| AU015228   | 0,04  | 0,94815841  | 0,13  | 0,786190103 | -0,15 | 0,777918093 | 0,03  | 0,939275881 | 0,12  | 0,843846988 |
| AU015336   | -0,09 | 0,899359458 | -0,58 | 0,579849423 | -0,2  | 0,654402247 | 0,52  | 0,52218381  | -0,23 | 0,763240477 |
| AU015836   | -0,12 | 0,84900712  | -0,39 | 0,77046207  | -0,39 | 0,503729732 | 0,18  | 0,711311852 | 0,08  | 0,948759136 |
| AU016765   | 0,04  | 0,963914207 | 0,25  | 0,88741189  | -0,09 | 0,899296785 | 0,01  | 0,990233026 | -0,04 | 0,970154126 |
| AU018091   | 0,19  | 0,687662951 | -0,25 | 0,808498635 | -0,52 | 0,410239762 | 0,3   | 0,601996277 | 0,38  | 0,71265105  |
| AU019823   | 0,48  | 0,493444352 | 0,33  | 0,755498335 | -0,27 | 0,777568498 | -0,34 | 0,514962191 | 0,64  | 0,32673984  |

|          |       |             |       |             |       |             |       |             |       |             |
|----------|-------|-------------|-------|-------------|-------|-------------|-------|-------------|-------|-------------|
| AU019990 | 0,04  | 0,950669622 | 0,07  | 0,948771582 | 0,26  | 0,58363268  | -0,05 | 0,917580503 | -0,08 | 0,918290969 |
| AU020206 | 0,81  | 0,231191495 | 1,3   | 0,087315688 | -0,68 | 0,379638471 | -1,5  | 0,01328151  | 0,59  | 0,187022034 |
| AU021063 | -0,15 | 0,886813669 | 0,47  | 0,812459283 | -0,21 | 0,791876238 | -0,53 | 0,6282575   | -0,6  | 0,73486361  |
| AU021092 | 0,25  | 0,758636946 | -0,02 | 0,989873399 | 0,6   | 0,367992729 | -3,3  | 0,003009221 | -0,55 | 0,257751018 |
| AU022252 | -0,1  | 0,853695324 | 0,14  | 0,772558681 | 0,47  | 0,530603857 | 0,49  | 0,253124162 | -0,44 | 0,434163214 |
| AU022751 | -0,36 | 0,58079696  | 0,12  | 0,829981547 | 0,11  | 0,904239687 | 0,1   | 0,873610553 | 0,42  | 0,536639649 |
| AU022754 | -0,05 | 0,951007775 | 0,14  | 0,863233628 | 0,06  | 0,936425237 | -0,03 | 0,949432584 | -0,23 | 0,757562438 |
| AU022793 | -0,04 | 0,971922167 | -0,04 | 0,954378914 | -0,16 | 0,807786405 | -0,12 | 0,758772982 | 0,11  | 0,912594881 |
| AU023762 | -0,16 | 0,828837975 | -0,18 | 0,775155136 | -0,29 | 0,642117883 | 0,07  | 0,936482652 | -0,26 | 0,745463091 |
| AU040320 | -0,55 | 0,226887858 | 0,2   | 0,756267547 | -0,49 | 0,503267519 | 0,29  | 0,669860197 | 0,05  | 0,968944162 |
| AU040972 | 0,01  | 0,99276206  | -0,05 | 0,937587693 | 0,01  | 0,995985283 | -0,13 | 0,813910235 | -0,21 | 0,779680122 |
| AU041133 | 0,04  | 0,978126898 | -0,14 | 0,952099316 | -0,33 | 0,712697139 | 0,25  | 0,644043374 | -0,46 | 0,562557824 |
| Auh      | -0,46 | 0,384432433 | 0,25  | 0,789363581 | -0,25 | 0,74662944  | -0,99 | 0,215551139 | -0,16 | 0,898309858 |
| Aunip    | -1,66 | 0,135369075 | -1,88 | 0,18376765  | 1,31  | 0,12691088  | 2,32  | 0,028737348 | 0,3   | 0,819497528 |
| Aup1     | 0,36  | 0,333032831 | 0,1   | 0,831580851 | 0,16  | 0,808264821 | -0,12 | 0,785767773 | 0,02  | 0,984125319 |
| Aurka    | -0,82 | 0,102058516 | -0,99 | 0,104971247 | 0,84  | 0,264885341 | 1,73  | 0,01851295  | -0,09 | 0,953297732 |
| Aurkaip1 | -0,32 | 0,589547327 | -0,13 | 0,794423608 | 0,13  | 0,852194581 | -0,42 | 0,187937224 | -0,42 | 0,628274636 |
| Aurkb    | -1,43 | 0,154447523 | -2,04 | 0,098272554 | 1,89  | 0,038411212 | 3,1   | 0,011041643 | -0,34 | 0,765809384 |
| Aurkc    | 0,01  | 0,993728727 | -0,07 | 0,898238238 | -0,19 | 0,794194778 | 0,3   | 0,474127813 | 0,01  | 0,992629177 |
| Auts2    | -1,01 | 0,098520786 | -0,43 | 0,613344994 | -0,37 | 0,755490461 | 0,38  | 0,727197341 | -0,28 | 0,814438115 |
| AV039307 | -0,5  | 0,363930021 | -0,06 | 0,932144238 | -0,09 | 0,917355305 | -0,3  | 0,313562807 | 0,18  | 0,881968395 |
| AV051173 | -0,12 | 0,803761785 | -0,16 | 0,677000136 | -0,92 | 0,151352948 | 0,12  | 0,739388845 | 0,55  | 0,535063818 |
| AV064505 | -0,53 | 0,481675386 | -0,01 | 0,992929085 | 0,13  | 0,877598693 | 0     | 1           | 0,07  | 0,969994712 |
| AV320801 | -0,1  | 0,882500171 | -0,04 | 0,954024651 | 0,03  | 0,974856067 | 0,29  | 0,515350021 | 0,23  | 0,728483022 |
| Aven     | -0,17 | 0,802195677 | -0,09 | 0,947513208 | 0,16  | 0,868798569 | 0,59  | 0,551132041 | 0,31  | 0,829437698 |
| Avil     | 0,89  | 0,277154156 | 0,57  | 0,565603216 | -0,55 | 0,353905777 | -0,49 | 0,276093686 | 0,14  | 0,888634933 |
| Avl9     | 0,82  | 0,08143898  | 0,62  | 0,335724646 | -0,27 | 0,693217111 | 0,09  | 0,853331689 | 0,44  | 0,389664866 |
| Avp      | 0,16  | 0,785491059 | -0,06 | 0,89647435  | 0,1   | 0,912968686 | 0,05  | 0,938689944 | 0,18  | 0,875421436 |
| Avpi1    | -0,62 | 0,412575527 | -0,19 | 0,812664394 | 0,15  | 0,881318437 | -0,19 | 0,730590656 | -0,14 | 0,84509819  |
| Avpr1a   | 0,36  | 0,760032001 | -0,22 | 0,905517116 | 0,12  | 0,890499122 | 0,8   | 0,212441993 | -0,46 | 0,452376077 |
| Avpr1b   | -0,11 | 0,832583186 | 0,12  | 0,842953835 | -0,31 | 0,599364835 | 0,03  | 0,949967419 | -0,43 | 0,46663731  |
| Avpr2    | 0,46  | 0,470219488 | 0,12  | 0,82505545  | -0,23 | 0,764671707 | -0,56 | 0,187709521 | -0,01 | 0,990633766 |
| AW011738 | -0,13 | 0,850899383 | 0,31  | 0,615288453 | -0,5  | 0,303368469 | -0,01 | 0,985341609 | 0,25  | 0,715879151 |
| AW011956 | 0,25  | 0,832071722 | 0,52  | 0,746998924 | -0,3  | 0,700593426 | 0,5   | 0,437496982 | 0,34  | 0,83296791  |
| AW046200 | 0,18  | 0,866720868 | -0,04 | 0,989873399 | -0,68 | 0,313378726 | -1,08 | 0,348369974 | -0,83 | 0,448887062 |

|               |       |             |       |             |       |             |       |             |       |             |
|---------------|-------|-------------|-------|-------------|-------|-------------|-------|-------------|-------|-------------|
| AW047730      | -0,42 | 0,725916534 | -0,2  | 0,708738408 | 0,02  | 0,993379272 | 0,13  | 0,903739255 | -0,19 | 0,890957032 |
| AW112010      | 1,54  | 0,175830295 | 1,24  | 0,068939596 | -2,53 | 0,000516499 | 0,82  | 0,088735103 | 1,48  | 0,011688351 |
| AW121686      | 0,1   | 0,824728873 | -0,26 | 0,493391321 | 0,16  | 0,772920623 | 0     | 0,993337409 | -0,24 | 0,681597394 |
| AW146154      | 0,2   | 0,826457489 | 0,15  | 0,750160982 | -0,25 | 0,686061973 | 0,16  | 0,665832473 | 0,2   | 0,818041383 |
| AW209491      | -0,41 | 0,48622865  | -0,28 | 0,657157409 | 0,01  | 0,992510518 | 0,05  | 0,931250259 | 0,17  | 0,845607427 |
| AW495222      | 0,14  | 0,750634506 | 0,32  | 0,58591598  | -0,12 | 0,864598204 | -0,05 | 0,949239972 | -0,1  | 0,890833196 |
| AW549542      | -0,26 | 0,833900133 | -0,57 | 0,640465998 | -1,01 | 0,199678278 | -0,54 | 0,397315282 | 0,04  | 0,982175252 |
| AW549877      | 0,26  | 0,65761852  | 0,44  | 0,517903951 | -0,59 | 0,457740325 | -0,63 | 0,308597515 | 0,19  | 0,846075697 |
| AW551984      | -0,21 | 0,783929127 | 0,24  | 0,810875398 | -0,73 | 0,436186409 | -0,86 | 0,135560136 | -0,39 | 0,601753447 |
| AW554918      | -0,55 | 0,498518473 | -0,29 | 0,625404791 | 0,23  | 0,834948218 | -1,07 | 0,113657145 | -0,49 | 0,488888835 |
| AW822252      | 0,18  | 0,869367353 | -0,51 | 0,49761736  | -0,11 | 0,932932843 | 0,93  | 0,193697655 | 0,38  | 0,619455895 |
| Awat1         | -0,07 | 0,936871609 | -0,01 | 0,995199255 | 0,32  | 0,700433004 | -0,06 | 0,957573971 | -0,18 | 0,832781095 |
| Awat2         | -0,08 | 0,921628755 | -0,39 | 0,487771533 | 0,11  | 0,894239558 | -0,03 | 0,978728328 | -0,06 | 0,969994712 |
| Axdnd1        | 0,33  | 0,717407143 | 0,33  | 0,887889466 | 0,2   | 0,817780561 | -0,02 | 0,994638711 | -0,34 | 0,833369653 |
| Axin1         | 0,15  | 0,84900712  | 0,32  | 0,637224838 | -0,05 | 0,965703516 | -0,14 | 0,87613802  | -0,39 | 0,600537288 |
| Axin2         | 0,87  | 0,089531229 | 0,54  | 0,414656674 | -0,76 | 0,260408634 | -1,32 | 0,046473133 | 0,38  | 0,587576064 |
| Axl           | -0,52 | 0,481048148 | 0,54  | 0,229092429 | 1,34  | 0,109746514 | -1,75 | 0,006455698 | -0,09 | 0,921720089 |
| AY074887      | 0,07  | 0,93786481  | 0,25  | 0,510091302 | -0,16 | 0,794194778 | -0,08 | 0,886806548 | -0,14 | 0,850707658 |
| AY358078      | 0,59  | 0,35419917  | 0,01  | 0,999395995 | -0,18 | 0,882540073 | 0,1   | 0,944967857 | -0,06 | 0,977707446 |
| AY512915      | -0,17 | 0,782876517 | 0,54  | 0,671319666 | -0,53 | 0,216719297 | -0,06 | 0,914640741 | -0,14 | 0,859663155 |
| AY512931      | -0,17 | 0,788594325 | -0,3  | 0,600657191 | -0,19 | 0,775492921 | 0,57  | 0,165050366 | 0,33  | 0,616700013 |
| AY702102      | 0,25  | 0,69656531  | -0,42 | 0,560787311 | 0,2   | 0,823823322 | 0,32  | 0,482526814 | -0,08 | 0,939765685 |
| AY702103      | -0,1  | 0,923035054 | -0,24 | 0,832968521 | 0,1   | 0,902637441 | 0,4   | 0,497932899 | 0,04  | 0,974145774 |
| AY761184      | 0,28  | 0,574608525 | 0,24  | 0,601295905 | -0,29 | 0,646210295 | -0,02 | 0,986768223 | 0,56  | 0,649339908 |
| AY761185      | 0,14  | 0,756443747 | -0,18 | 0,827237618 | 0,03  | 0,977897176 | 0,14  | 0,785603422 | 0,08  | 0,916297433 |
| Aym1          | 0,21  | 0,721484809 | 0,02  | 0,982328934 | 0,09  | 0,940619966 | -0,14 | 0,694650822 | -0,11 | 0,901886776 |
| Azgp1         | 0,07  | 0,902628825 | 0,52  | 0,389273523 | -0,09 | 0,908428015 | -0,04 | 0,932512513 | 0,25  | 0,68177827  |
| Azi2          | 0,26  | 0,622478997 | 0,15  | 0,852913682 | -0,83 | 0,069458102 | 0,05  | 0,966701307 | 0,68  | 0,450543672 |
| Azin1         | -0,15 | 0,813460438 | 0,2   | 0,607209439 | 0,31  | 0,635864143 | -0,2  | 0,701007758 | 0,39  | 0,54819971  |
| Azin2         | 1,24  | 0,104092085 | 0,57  | 0,244905942 | -0,1  | 0,885705243 | 0,2   | 0,687560664 | -0,33 | 0,676744294 |
| B020004C17Rik | 0,36  | 0,687662951 | 0,33  | 0,643895096 | -0,31 | 0,779569296 | 0,1   | 0,900529161 | 0,71  | 0,226701712 |
| B020004J07Rik | 0,13  | 0,923180948 | -0,13 | 0,89034555  | 0,01  | 0,996260936 | 0,08  | 0,924520726 | -0,11 | 0,912890826 |
| B020010K11Rik | -0,85 | 0,107118805 | 0,02  | 0,998237793 | 0,31  | 0,533023142 | -0,28 | 0,549974055 | -0,29 | 0,646672171 |
| B020014A21Rik | 0,18  | 0,810573349 | -0,28 | 0,728434379 | -0,02 | 0,983094261 | -0,13 | 0,783528833 | -0,14 | 0,826323876 |
| B020018J22Rik | 0,06  | 0,923180948 | 0,13  | 0,795850594 | 0,07  | 0,921956183 | 0,09  | 0,829478092 | 0,08  | 0,919325625 |



|               |       |             |       |             |       |             |       |             |       |             |
|---------------|-------|-------------|-------|-------------|-------|-------------|-------|-------------|-------|-------------|
| B020031M17Rik | 0,09  | 0,84900712  | 0,1   | 0,847363727 | -0,3  | 0,542398079 | -0,37 | 0,265568899 | -0,11 | 0,879854771 |
| B130006D01Rik | -0,08 | 0,972418196 | 0,06  | 0,9860901   | 0,44  | 0,404341148 | -0,25 | 0,828361053 | 0,88  | 0,558488093 |
| B130011K05Rik | -0,09 | 0,866550319 | 0,19  | 0,638535584 | -0,11 | 0,881793393 | -0,04 | 0,935525116 | -0,07 | 0,934344891 |
| B130024G19Rik | 0,44  | 0,556745354 | -0,52 | 0,277253387 | 0,01  | 0,997394645 | -1,19 | 0,037448594 | -0,12 | 0,915356549 |
| B130034C11Rik | -0,19 | 0,642618049 | -0,42 | 0,496584866 | 0,57  | 0,473293361 | 0,42  | 0,456445735 | -0,16 | 0,863819335 |
| B130046B21Rik | -0,35 | 0,526856715 | -0,2  | 0,809166651 | -0,29 | 0,686061973 | 0,08  | 0,927735789 | -0,45 | 0,408862062 |
| B130055M24Rik | 0,21  | 0,656095444 | 0,5   | 0,628604582 | -0,13 | 0,807486378 | 0,2   | 0,664421412 | -0,01 | 0,991980521 |
| B230104I21Rik | 0,47  | 0,239601221 | -0,04 | 0,954009845 | -0,08 | 0,899292348 | 0,05  | 0,943143586 | 0,02  | 0,981913783 |
| B230110C06Rik | 0,07  | 0,918693402 | -0,12 | 0,868234125 | -0,04 | 0,980845215 | 0,19  | 0,868743047 | -0,04 | 0,981755394 |
| B230112J18Rik | -0,16 | 0,808947569 | -0,5  | 0,667684858 | 0,59  | 0,448782702 | 1,29  | 0,130690458 | 0,03  | 0,98519668  |
| B230118H07Rik | -0,35 | 0,603814354 | 0,1   | 0,841090266 | 0,63  | 0,595036513 | -0,81 | 0,134491611 | -0,43 | 0,587305934 |
| B230119M05Rik | 0,08  | 0,887555241 | -0,25 | 0,652391899 | 0,15  | 0,777918093 | 0,34  | 0,48505774  | 0,08  | 0,918897359 |
| B230206H07Rik | 0,03  | 0,976920494 | -0,32 | 0,616812784 | -0,12 | 0,86101526  | -0,31 | 0,523255995 | -0,06 | 0,948935854 |
| B230206L02Rik | 0,29  | 0,613677025 | -0,18 | 0,752804236 | -0,13 | 0,875486206 | 0     | 1           | -0,44 | 0,582943922 |
| B230208H11Rik | 0,18  | 0,774822327 | 0,27  | 0,646170664 | 0,03  | 0,973732268 | -0,6  | 0,326491036 | 0,04  | 0,975441362 |
| B230209E15Rik | 0,08  | 0,944291635 | -0,01 | 0,999951794 | 0,16  | 0,836625711 | 0,34  | 0,428295778 | 0,08  | 0,954694993 |
| B230214G05Rik | -0,33 | 0,555679313 | -0,21 | 0,808222835 | -0,12 | 0,862869965 | 0,08  | 0,908141892 | 0,21  | 0,81543634  |
| B230216N24Rik | 0,17  | 0,764288636 | -0,55 | 0,488489865 | 0,19  | 0,819410193 | 0,83  | 0,069351821 | 0,85  | 0,083660756 |
| B230217C12Rik | 0,1   | 0,925084264 | 0,13  | 0,828219939 | -0,04 | 0,977511821 | 0,04  | 0,97581815  | 0,44  | 0,695702232 |
| B230217O12Rik | -0,81 | 0,352898728 | -0,43 | 0,771641267 | 0,39  | 0,579159818 | 0,62  | 0,454948356 | 0,3   | 0,626176831 |
| B230219D22Rik | 0,19  | 0,698332739 | -0,21 | 0,770521007 | 0,15  | 0,834205123 | -0,17 | 0,716752012 | -0,19 | 0,742614391 |
| B230303O12Rik | 0,2   | 0,626036023 | 0,29  | 0,506579276 | 0,02  | 0,987563007 | -0,45 | 0,17421446  | -0,1  | 0,893033668 |
| B230307C23Rik | -0,3  | 0,5976608   | -0,44 | 0,307323396 | -0,51 | 0,703031073 | 0,19  | 0,900285116 | 0,75  | 0,535065209 |
| B230312C02Rik | -0,57 | 0,417482906 | -0,55 | 0,785128233 | -0,5  | 0,500343254 | -0,04 | 0,966197507 | -0,32 | 0,582633868 |
| B230317F23Rik | 0,09  | 0,90742841  | 0,12  | 0,882847123 | 0,04  | 0,983471086 | 0,15  | 0,827764222 | 0,29  | 0,696227639 |
| B230319C09Rik | 0,03  | 0,968370059 | -0,04 | 0,959837002 | -0,15 | 0,870311951 | 0,29  | 0,449617998 | 0,21  | 0,734230208 |
| B230323A14Rik | 0,29  | 0,52372418  | -0,12 | 0,876397305 | 0,2   | 0,819577283 | 0,09  | 0,85301747  | -0,09 | 0,922577223 |
| B230325K18Rik | 0,17  | 0,80226019  | 0,03  | 0,987867499 | -0,54 | 0,638965268 | -0,49 | 0,428038494 | -0,14 | 0,848679763 |
| B230344G16Rik | -0,03 | 0,972720447 | -0,3  | 0,715733316 | -0,19 | 0,782022139 | -0,47 | 0,418568872 | -1,19 | 0,055520994 |
| B230354K17Rik | -0,5  | 0,412607475 | -0,53 | 0,444058759 | 0,23  | 0,789802954 | 0,25  | 0,677419781 | -0,18 | 0,843226911 |
| B230369F24Rik | 0,5   | 0,329577496 | 0     | 1           | 0,16  | 0,770526999 | -0,71 | 0,176649178 | -0,21 | 0,89630096  |
| B230398E01Rik | -0,09 | 0,908658974 | 0,11  | 0,87566343  | -0,19 | 0,743900482 | 0,25  | 0,596670571 | 0,06  | 0,945776926 |
| B2m           | 0,39  | 0,494679097 | 0,06  | 0,903595287 | -0,26 | 0,530318769 | -0,07 | 0,864379203 | 0,12  | 0,836061657 |
| B330016D10Rik | -0,26 | 0,534079959 | 0,04  | 0,938638797 | 0,22  | 0,706842882 | -1,2  | 0,062574017 | -0,9  | 0,102038175 |
| B3galnt1      | 0,02  | 0,982842179 | 0,99  | 0,131421541 | -0,21 | 0,877598693 | -0,44 | 0,419529062 | -0,12 | 0,916173996 |

|               |       |             |       |             |       |             |       |             |       |             |
|---------------|-------|-------------|-------|-------------|-------|-------------|-------|-------------|-------|-------------|
| B3galnt2      | -0,29 | 0,642494937 | -0,15 | 0,85154774  | 0,86  | 0,15569544  | -0,29 | 0,524018746 | 0,11  | 0,906338603 |
| B3galt1       | 0,88  | 0,121359553 | 0,24  | 0,854580121 | -0,14 | 0,86182019  | -0,9  | 0,382691377 | 0,55  | 0,666758661 |
| B3galt2       | -0,22 | 0,663447662 | 0,06  | 0,921610565 | 0,02  | 0,97548193  | 0,11  | 0,799256118 | -0,02 | 0,986020537 |
| B3galt4       | -0,19 | 0,819903887 | 0,06  | 0,937377463 | -0,02 | 0,985347628 | 0,16  | 0,701150944 | 0     | 0,999572304 |
| B3galt5       | -0,16 | 0,878562194 | 0,45  | 0,620290002 | 0,04  | 0,96043738  | -0,05 | 0,946065261 | 0,11  | 0,915238726 |
| B3galt6       | -0,05 | 0,942948768 | -0,2  | 0,73495822  | 0,74  | 0,206505714 | 0,17  | 0,653400029 | -0,2  | 0,750504485 |
| B3gat1        | -0,4  | 0,370606588 | 0,19  | 0,797179996 | -0,06 | 0,940489823 | -0,38 | 0,37176143  | -0,42 | 0,462918176 |
| B3gat2        | -0,01 | 0,990404752 | 0,26  | 0,738984063 | -0,21 | 0,821276482 | -0,27 | 0,464215931 | -0,25 | 0,721622418 |
| B3gat3        | 0,12  | 0,803557792 | -0,18 | 0,851085879 | 0,24  | 0,606705146 | 0,26  | 0,550724115 | -0,03 | 0,973428839 |
| B3glct        | -0,37 | 0,319628888 | -0,25 | 0,73408402  | 1,02  | 0,169619185 | -0,23 | 0,639108834 | -0,49 | 0,549450339 |
| B3gnt2        | 0,13  | 0,865689677 | 0,06  | 0,932338539 | -0,52 | 0,347987056 | -0,05 | 0,944769683 | 0,74  | 0,269243865 |
| B3gnt3        | -0,17 | 0,72711401  | -0,12 | 0,859954464 | -0,01 | 0,991240121 | 1,07  | 0,053923118 | 0,55  | 0,354557431 |
| B3gnt4        | 0,03  | 0,970660999 | -0,09 | 0,926157704 | 0,11  | 0,90672161  | -0,38 | 0,690443005 | 0,42  | 0,639785525 |
| B3gnt5        | 0,14  | 0,892141122 | 0,42  | 0,748874675 | 0,34  | 0,590619197 | 1     | 0,037556953 | 0,49  | 0,684658891 |
| B3gnt6        | 0,04  | 0,959985598 | -0,82 | 0,620187279 | -0,24 | 0,76031147  | 1     | 0,315850243 | 0,19  | 0,909024113 |
| B3gnt7        | 0,22  | 0,642385552 | -0,09 | 0,917256002 | -0,38 | 0,470650375 | 0,01  | 0,990868391 | -0,19 | 0,814864454 |
| B3gnt8        | -0,31 | 0,519597081 | -0,4  | 0,641804702 | 0,19  | 0,744387748 | -0,83 | 0,407758202 | -0,49 | 0,738412365 |
| B3gnt9        | 0,13  | 0,892062603 | 0,12  | 0,937424389 | 0,23  | 0,702851783 | 1,4   | 0,06195481  | 0,49  | 0,479585604 |
| B3gnt1        | -0,05 | 0,970463755 | 0,49  | 0,518546531 | 0,02  | 0,985187368 | -0,44 | 0,51910611  | -0,36 | 0,587576064 |
| B430010I23Rik | 0,03  | 0,972112267 | 0,16  | 0,824372931 | -0,33 | 0,469544898 | -0,13 | 0,711878469 | 0,16  | 0,840952901 |
| B430119L08Rik | -0,14 | 0,766451086 | -0,07 | 0,892869412 | -0,25 | 0,713433657 | -0,15 | 0,719124768 | -0,11 | 0,904371266 |
| B430203G13Rik | -0,43 | 0,427486466 | 0,24  | 0,869488567 | 0,1   | 0,898305096 | 0,18  | 0,681233185 | 0,22  | 0,825408041 |
| B430212C06Rik | 0,32  | 0,680863515 | -0,27 | 0,703863321 | 0,28  | 0,70834039  | 0,18  | 0,663350016 | -0,01 | 0,993958324 |
| B430305J03Rik | -0,38 | 0,460231397 | 0,04  | 0,948314657 | -0,07 | 0,959650277 | 0,3   | 0,432105069 | -0,4  | 0,571042732 |
| B430306N03Rik | -0,04 | 0,94881239  | 0,04  | 0,945143056 | -0,78 | 0,307649242 | 0,28  | 0,477972946 | 0,21  | 0,793110939 |
| B430319F04Rik | -0,04 | 0,953269094 | -0,03 | 0,96497149  | -0,26 | 0,702149525 | -0,11 | 0,884326814 | 0,01  | 0,99257599  |
| B430319G15Rik | -0,32 | 0,455526465 | 0,09  | 0,918101209 | 0,3   | 0,806044178 | -0,39 | 0,416071305 | 0,29  | 0,718925476 |
| B430319H21Rik | 0,15  | 0,815649066 | -0,29 | 0,596827853 | -0,13 | 0,864321711 | -0,12 | 0,891975149 | -0,23 | 0,868167014 |
| B4galnt1      | -0,08 | 0,906413574 | -0,19 | 0,860602717 | 0,4   | 0,641439342 | -0,74 | 0,119316814 | -0,68 | 0,253125485 |
| B4galnt2      | 0,22  | 0,633940882 | 0,29  | 0,750709388 | -0,53 | 0,392070042 | -0,02 | 0,971422407 | 0,39  | 0,488152824 |
| B4galnt3      | 0,15  | 0,812059531 | -0,02 | 0,978177636 | -0,53 | 0,467503988 | 0,66  | 0,161626639 | 0,26  | 0,773981116 |
| B4galnt4      | 0,04  | 0,970463755 | 0,22  | 0,75380926  | 1,4   | 0,054936135 | -0,16 | 0,810508503 | 0,43  | 0,573801069 |
| B4galt1       | -0,34 | 0,428049245 | -0,02 | 0,983694775 | 0,64  | 0,302861841 | 0,04  | 0,957432042 | 0,34  | 0,629481302 |
| B4galt2       | -0,8  | 0,153824107 | -0,82 | 0,10752682  | 0,57  | 0,334270696 | 0,4   | 0,716228493 | -0,32 | 0,840036408 |
| B4galt3       | -0,2  | 0,649012144 | 0,45  | 0,413220409 | -0,29 | 0,740579016 | 2,35  | 0,005310772 | 0,24  | 0,796586414 |

|               |       |             |       |             |       |             |       |             |       |             |
|---------------|-------|-------------|-------|-------------|-------|-------------|-------|-------------|-------|-------------|
| B4galt4       | -0,91 | 0,394325842 | -0,27 | 0,770521007 | 0,11  | 0,841563482 | -0,64 | 0,138701324 | -0,73 | 0,216124082 |
| B4galt5       | 0,08  | 0,945655294 | 0,22  | 0,690689459 | 0,12  | 0,938291859 | 0,73  | 0,332144678 | 1,18  | 0,091661588 |
| B4galt6       | -0,64 | 0,264905455 | 0,36  | 0,346384135 | 0,62  | 0,443341184 | 0,68  | 0,348565724 | -0,08 | 0,939448119 |
| B4galt7       | -0,26 | 0,722860586 | -0,18 | 0,891785313 | -0,17 | 0,903918012 | 0,63  | 0,645516445 | -0,06 | 0,979456872 |
| B4gat1        | 0,05  | 0,922118639 | -0,11 | 0,845231127 | 0,14  | 0,872313115 | 0,05  | 0,965565431 | -0,01 | 0,992629177 |
| B530045E10Rik | 0,26  | 0,657723995 | 0,25  | 0,59879204  | 0,22  | 0,771789829 | 0,06  | 0,916072825 | -0,07 | 0,936834819 |
| B630005N14Rik | -0,32 | 0,619127292 | 0,19  | 0,928134372 | 0,39  | 0,494247309 | 0,07  | 0,923119077 | 0,17  | 0,835191    |
| B630019A10Rik | 0,23  | 0,664249163 | 0,2   | 0,615311543 | -0,29 | 0,618711263 | 0,09  | 0,902841605 | -0,28 | 0,708898543 |
| B630019K06Rik | -0,35 | 0,37178952  | -0,26 | 0,790939978 | 0,33  | 0,648438146 | -0,05 | 0,911958998 | -0,05 | 0,956610289 |
| B830017H08Rik | 0,21  | 0,608307071 | -0,05 | 0,915265253 | -0,34 | 0,540782039 | 0,06  | 0,906729008 | 0,28  | 0,626540936 |
| B930018H19Rik | -0,21 | 0,789385646 | -0,09 | 0,934280572 | -0,21 | 0,721952929 | 0,14  | 0,80391105  | -0,05 | 0,951429597 |
| B930025P03Rik | 0,21  | 0,703129517 | 0,13  | 0,823922494 | 0,02  | 0,988204404 | 0,07  | 0,917424194 | 0,36  | 0,628127128 |
| B930036N10Rik | -0,07 | 0,900340189 | 0,02  | 0,987282412 | -0,05 | 0,969546385 | 0,41  | 0,428746344 | 0,15  | 0,876418697 |
| B930041F14Rik | -0,07 | 0,924139727 | -0,18 | 0,724572503 | -0,22 | 0,660920525 | -0,2  | 0,690659674 | -0,3  | 0,608004947 |
| B930054O08    | -0,02 | 0,984972115 | -0,04 | 0,980385701 | -0,28 | 0,715547198 | 0,3   | 0,373068637 | 0,27  | 0,602192799 |
| B930059L03Rik | 0,34  | 0,522076759 | 0,09  | 0,857880695 | -0,07 | 0,935460375 | -0,48 | 0,36212016  | 0,37  | 0,588641763 |
| B930071A02    | -0,11 | 0,79795086  | -0,17 | 0,792086001 | 0,16  | 0,783881696 | 0,05  | 0,922275195 | 0,27  | 0,765809384 |
| B930082K07Rik | 0,06  | 0,948926586 | 0,19  | 0,735554037 | -0,38 | 0,435556279 | -0,35 | 0,555853138 | -0,02 | 0,985772016 |
| B930092H01Rik | 0,14  | 0,803557792 | -0,52 | 0,405773884 | -0,54 | 0,370554673 | 0,03  | 0,95906327  | 0,35  | 0,463963526 |
| B930094E09Rik | 0,06  | 0,944722622 | -0,04 | 0,973715143 | -0,1  | 0,899913569 | 0,23  | 0,668471362 | 0,1   | 0,943668392 |
| B930094L07Rik | 0,15  | 0,8282842   | -0,14 | 0,842809435 | 0     | 0,998294229 | -0,43 | 0,509774032 | -0,25 | 0,800540569 |
| B930095G15Rik | 0,02  | 0,986831213 | -0,35 | 0,48645383  | 0,49  | 0,343192409 | 0,08  | 0,915532343 | -0,2  | 0,783658895 |
| B9d1          | -0,01 | 0,993175772 | -0,09 | 0,916042399 | 0,18  | 0,857331197 | -0,06 | 0,929314989 | -0,62 | 0,265342858 |
| B9d1os        | 0,15  | 0,736614041 | 0,13  | 0,892473006 | 0,17  | 0,794194778 | -0,03 | 0,970931237 | 0,1   | 0,937446198 |
| B9d2          | 0,23  | 0,8634587   | -0,01 | 0,989544005 | 0,3   | 0,656925539 | -0,3  | 0,646432393 | -0,04 | 0,973369302 |
| Baalc         | 0,12  | 0,892124736 | -0,38 | 0,654778612 | 0,3   | 0,794522895 | -0,67 | 0,495340036 | -1,29 | 0,178218223 |
| Baat          | -0,14 | 0,764057486 | 0,03  | 0,98230594  | -0,12 | 0,858001959 | 0,17  | 0,776545078 | 0,51  | 0,404813316 |
| Babam1        | 0,31  | 0,613387484 | -0,1  | 0,916730432 | 0,78  | 0,161469949 | 0,82  | 0,183972008 | 0,06  | 0,950308536 |
| Bace1         | -0,68 | 0,178589155 | -0,86 | 0,138101221 | 0,46  | 0,529144245 | 0,04  | 0,985370891 | -0,19 | 0,91795047  |
| Bace2         | -0,65 | 0,253333488 | -0,74 | 0,249103754 | 0,21  | 0,845321518 | 0,48  | 0,710855553 | -0,85 | 0,454039023 |
| Bach1         | 0,48  | 0,269151748 | 0,48  | 0,457889449 | -0,28 | 0,700061351 | 0,56  | 0,179012087 | 1,07  | 0,043727018 |
| Bach2         | 0,34  | 0,761524022 | 0,61  | 0,296064095 | -0,83 | 0,445150751 | -1,6  | 0,021172356 | -0,59 | 0,368554903 |
| Bach2it1      | 0,23  | 0,85617916  | 0,43  | 0,774933784 | 0,2   | 0,77568242  | 0,13  | 0,940891309 | 0,85  | 0,576777161 |
| Bach2os       | -0,02 | 0,985842627 | 0,4   | 0,792086001 | -0,35 | 0,573350883 | -0,26 | 0,480493327 | -0,6  | 0,155052166 |
| Bad           | 0,01  | 0,991125401 | -0,41 | 0,340300574 | 0,48  | 0,501664412 | 0,28  | 0,367131023 | -0,58 | 0,193796626 |

|           |       |             |       |             |       |             |       |             |       |             |
|-----------|-------|-------------|-------|-------------|-------|-------------|-------|-------------|-------|-------------|
| Bag1      | -0,24 | 0,56461489  | -0,25 | 0,664787536 | 0,3   | 0,610313044 | 0,43  | 0,191338088 | -0,02 | 0,979392852 |
| Bag2      | -0,27 | 0,68194299  | -0,07 | 0,939419844 | 0,69  | 0,36401558  | 0,03  | 0,968311421 | -0,31 | 0,71621363  |
| Bag3      | -0,12 | 0,787080461 | 0,14  | 0,814548536 | -0,07 | 0,904057901 | -0,11 | 0,831919183 | 0,18  | 0,825990389 |
| Bag4      | -0,05 | 0,964272364 | 0,56  | 0,179411793 | 0,77  | 0,420043356 | -0,6  | 0,143383775 | -0,31 | 0,726339638 |
| Bag5      | -0,39 | 0,325818963 | 0,03  | 0,978547588 | 0,2   | 0,759690405 | -0,54 | 0,310358435 | -0,3  | 0,58443135  |
| Bag6      | -0,09 | 0,874467978 | -0,28 | 0,664844961 | 0,35  | 0,543291636 | -0,27 | 0,418317818 | -0,4  | 0,484862172 |
| Bahcc1    | -0,54 | 0,303907037 | -0,55 | 0,229092429 | 0,7   | 0,193794324 | 0,16  | 0,709465672 | -0,23 | 0,741456572 |
| Bahd1     | 0,1   | 0,919758492 | 0,23  | 0,689193472 | -0,46 | 0,379957289 | -0,13 | 0,713232512 | 0,03  | 0,976743304 |
| Baiap2    | -0,8  | 0,154000736 | -0,83 | 0,115555997 | 0,72  | 0,26430961  | -0,71 | 0,085065241 | -0,85 | 0,160991723 |
| Baiap2l1  | 0,57  | 0,616144081 | -0,66 | 0,526182879 | 1,67  | 0,041414494 | -0,87 | 0,392950833 | -0,05 | 0,976743304 |
| Baiap2l2  | 0,05  | 0,948926586 | 0,16  | 0,868538818 | 0,32  | 0,720069267 | -0,15 | 0,748929665 | -0,04 | 0,967036726 |
| Baiap3    | -0,4  | 0,469049834 | 0,06  | 0,943436096 | -0,29 | 0,660920525 | -0,44 | 0,19952262  | -0,15 | 0,817201767 |
| Bak1      | -0,1  | 0,869565514 | 0,26  | 0,549998267 | -0,2  | 0,766796774 | 1,88  | 0,027443269 | 0,83  | 0,225203212 |
| Bambi     | -0,36 | 0,612107783 | 0,44  | 0,43310124  | -0,24 | 0,708876309 | -0,52 | 0,103449425 | 0,27  | 0,590339443 |
| Bambi-ps1 | 0,24  | 0,593908972 | 0,16  | 0,864288349 | 0,45  | 0,459684945 | -0,27 | 0,472790446 | 0,51  | 0,272223679 |
| Banf1     | -0,33 | 0,491833357 | -0,3  | 0,620187279 | 0,4   | 0,602775092 | 1,11  | 0,071713131 | 0,4   | 0,502522199 |
| Banf2     | -0,26 | 0,782889069 | 0,38  | 0,617497649 | -0,09 | 0,926399742 | -0,29 | 0,504114639 | 0,17  | 0,859663155 |
| Banf2os   | -0,43 | 0,306829062 | -0,18 | 0,782652703 | -0,21 | 0,652112262 | 0,5   | 0,236604274 | 0,02  | 0,980961333 |
| Bank1     | 0,16  | 0,865055523 | 0,22  | 0,786394409 | -0,5  | 0,442143315 | -0,01 | 0,993337409 | -0,23 | 0,864292286 |
| Banp      | -0,02 | 0,978022183 | 0,27  | 0,534012937 | 0,09  | 0,925417014 | -0,29 | 0,546591132 | -0,2  | 0,808989975 |
| Bap1      | -0,41 | 0,455001921 | -0,11 | 0,892727342 | 0,18  | 0,703045192 | -0,12 | 0,767714535 | -0,21 | 0,758810523 |
| Bard1     | -0,03 | 0,973545171 | -0,36 | 0,828498885 | 0,52  | 0,210837457 | 0,78  | 0,128217003 | 0,15  | 0,846526184 |
| Barhl1    | -0,36 | 0,698332739 | 0,28  | 0,896322235 | -0,36 | 0,484120719 | 0,31  | 0,631534972 | 0,11  | 0,885318142 |
| Barhl2    | 0,39  | 0,458591721 | 0,25  | 0,708738408 | 0,28  | 0,538035883 | -0,06 | 0,920158794 | -0,03 | 0,977903513 |
| Barx1     | 0,15  | 0,766898048 | -0,12 | 0,818889977 | -0,27 | 0,547368463 | 0,08  | 0,909976349 | 0,41  | 0,633801825 |
| Barx2     | 0,02  | 0,973083901 | 0,18  | 0,750555245 | -0,28 | 0,621628579 | 0,03  | 0,966197507 | -0,03 | 0,979456872 |
| Basp1     | 1,08  | 0,318041432 | -0,15 | 0,895983785 | 0,03  | 0,973732268 | 1,07  | 0,24812886  | 1,47  | 0,067219139 |
| Batf      | 0,04  | 0,948087131 | -0,06 | 0,944060616 | -0,12 | 0,906747817 | 0,51  | 0,380741558 | 0,25  | 0,755677288 |
| Batf2     | 2,25  | 0,058225809 | 2,15  | 0,02262722  | -3,34 | 2,76692E-05 | 0,22  | 0,553928159 | 2,41  | 0,003331129 |
| Batf3     | 1,55  | 0,052930433 | 1,09  | 0,084290601 | -0,84 | 0,216361039 | 2,03  | 0,007919254 | 2,82  | 0,003659564 |
| Bax       | -0,1  | 0,832645049 | -0,15 | 0,731905282 | 0,33  | 0,570568062 | 0,62  | 0,088393639 | 0,09  | 0,903479163 |
| Baz1a     | 0,06  | 0,949362206 | 0,07  | 0,897574732 | -0,21 | 0,712697139 | 1,25  | 0,050184587 | 0,45  | 0,476496602 |
| Baz1b     | -0,07 | 0,910169157 | 0,29  | 0,480808447 | 0,37  | 0,532626868 | -0,23 | 0,603302092 | -0,12 | 0,897348919 |
| Baz2a     | 0,13  | 0,795659022 | 0,14  | 0,797124845 | 0,27  | 0,741623367 | 0,53  | 0,332781724 | 0,15  | 0,860919132 |
| Baz2b     | 0,21  | 0,669214167 | 0,24  | 0,581340358 | -0,03 | 0,973998536 | 0,06  | 0,889364462 | 0,16  | 0,792234713 |

|          |       |             |       |             |       |             |       |             |       |             |
|----------|-------|-------------|-------|-------------|-------|-------------|-------|-------------|-------|-------------|
| BB014433 | 0,01  | 0,988674093 | 0,11  | 0,854940418 | -0,15 | 0,821593262 | 0     | 1           | 0,01  | 0,987527273 |
| BB019430 | -0,21 | 0,816465857 | 0     | 1           | -0,1  | 0,952104131 | 0,28  | 0,742291133 | -0,14 | 0,869675527 |
| BB031773 | 0,07  | 0,919758492 | -0,3  | 0,582502577 | 0,11  | 0,906097666 | 0,19  | 0,682070739 | 0,11  | 0,887491686 |
| BB123696 | -0,13 | 0,773356367 | -0,12 | 0,828219939 | -0,22 | 0,70398922  | -0,22 | 0,520771029 | 0,25  | 0,703670469 |
| BB218582 | -0,1  | 0,927266332 | 0,49  | 0,793603525 | -0,26 | 0,765783874 | 0,11  | 0,947809027 | 0,23  | 0,862867603 |
| BB283400 | 0     | 0,998113653 | -0,1  | 0,829839151 | -0,04 | 0,955586257 | 0,41  | 0,378308626 | 0,21  | 0,732679577 |
| BB287469 | -0,18 | 0,779331628 | -0,38 | 0,384803204 | 0,18  | 0,710981763 | 0,02  | 0,969377207 | 0     | 0,9969305   |
| BB557941 | -0,08 | 0,958188047 | 0,59  | 0,360136287 | 0,16  | 0,832665595 | -0,17 | 0,706937999 | 0,17  | 0,830813323 |
| Bbc3     | 0,04  | 0,962442672 | 0,04  | 0,96172404  | -0,3  | 0,671012215 | 0,11  | 0,774826947 | 0,16  | 0,78512653  |
| Bbip1    | 0,37  | 0,449066873 | 0,45  | 0,467362999 | -0,29 | 0,779970041 | -0,03 | 0,971140825 | 0,28  | 0,720844381 |
| Bbof1    | 0,08  | 0,941218573 | 0,42  | 0,585330659 | -0,25 | 0,730738549 | -0,11 | 0,932800758 | 0,2   | 0,869517909 |
| Bbox1    | -0,05 | 0,917836966 | -0,31 | 0,785521672 | -0,12 | 0,891500876 | 0     | 1           | 0,51  | 0,48288529  |
| Bbs1     | -0,08 | 0,884230844 | -0,24 | 0,716668427 | 0,3   | 0,654328013 | -0,1  | 0,874558483 | -0,05 | 0,960974478 |
| Bbs10    | 0,32  | 0,687662951 | -0,47 | 0,517071375 | 0,43  | 0,642904349 | 0,31  | 0,393354297 | 0,04  | 0,968952017 |
| Bbs12    | 0,14  | 0,922591969 | 0,21  | 0,790939978 | 0,1   | 0,932577939 | -0,56 | 0,157598782 | -0,35 | 0,60760438  |
| Bbs2     | -0,26 | 0,663556512 | 0,51  | 0,401208626 | 0,03  | 0,986692159 | -1,74 | 0,017221956 | -0,2  | 0,798598035 |
| Bbs4     | -0,49 | 0,476180777 | 0,05  | 0,983363427 | 0,49  | 0,548190257 | -1,13 | 0,12574562  | -0,6  | 0,442639471 |
| Bbs5     | -0,28 | 0,803492493 | 0,05  | 0,984710854 | 1,19  | 0,049061241 | -0,5  | 0,561974365 | -0,54 | 0,653769438 |
| Bbs7     | -0,51 | 0,660558184 | 0,17  | 0,88928164  | 0,7   | 0,419537272 | -0,29 | 0,581788426 | -0,21 | 0,823098095 |
| Bbs9     | 0,2   | 0,874688734 | -0,22 | 0,87330769  | -0,02 | 0,991568687 | -0,07 | 0,965593428 | -0,55 | 0,623304657 |
| Bbx      | 0,6   | 0,241021853 | 0,91  | 0,280972546 | -0,3  | 0,692591179 | -0,55 | 0,369402121 | 0,84  | 0,145746841 |
| BC002059 | -0,96 | 0,178589155 | 0,24  | 0,693906911 | 0,33  | 0,905393221 | -0,53 | 0,393759175 | 0,65  | 0,353651444 |
| BC003331 | 0,08  | 0,944546118 | -0,12 | 0,852461907 | 0     | 0,99989524  | -0,91 | 0,203580306 | -0,54 | 0,590396118 |
| BC003965 | 0,03  | 0,963914207 | 0,05  | 0,928134372 | 0,3   | 0,576775067 | -0,53 | 0,376919105 | -0,18 | 0,840952901 |
| BC004004 | 0,1   | 0,882060783 | 0,03  | 0,966717367 | -0,01 | 0,996946245 | -0,21 | 0,548989121 | -0,29 | 0,583279373 |
| BC005512 | -0,02 | 0,962492281 | 0,05  | 0,914353074 | -0,07 | 0,915836302 | -0,06 | 0,896599656 | 0,2   | 0,765419939 |
| BC005537 | 0,19  | 0,652260778 | -0,1  | 0,839789639 | 0,14  | 0,822658666 | -0,03 | 0,949669541 | 0,13  | 0,838634367 |
| BC005561 | -0,5  | 0,306829062 | -0,21 | 0,839277519 | -0,21 | 0,83442082  | 0,2   | 0,800853287 | -0,09 | 0,937446198 |
| BC005624 | 0,04  | 0,959985598 | -0,31 | 0,49599855  | 0,07  | 0,936616368 | -0,38 | 0,215551139 | -0,48 | 0,525980128 |
| BC006965 | -0,08 | 0,892195063 | -0,44 | 0,589733014 | -0,11 | 0,916403684 | 0,48  | 0,649891314 | 0,21  | 0,876188515 |
| BC016548 | 0,35  | 0,436489637 | 0,04  | 0,966717367 | -0,11 | 0,884597715 | -0,09 | 0,913170886 | -0,18 | 0,879072575 |
| BC016579 | -0,26 | 0,717407143 | -0,06 | 0,969314504 | -0,38 | 0,597838033 | -0,3  | 0,546387172 | -0,11 | 0,935812103 |
| BC017158 | -0,16 | 0,820023436 | -0,39 | 0,706028548 | 0,33  | 0,571405665 | -0,16 | 0,879005234 | -0,51 | 0,53021194  |
| BC017643 | -0,34 | 0,632053719 | 0,71  | 0,115392055 | 0,64  | 0,401632073 | 0,23  | 0,838806433 | 0,47  | 0,651895091 |
| BC018473 | 0,43  | 0,376305612 | 0,09  | 0,912516873 | -0,15 | 0,787094995 | -0,13 | 0,829193043 | -0,12 | 0,917419507 |

|          |       |             |       |             |       |             |       |             |       |             |
|----------|-------|-------------|-------|-------------|-------|-------------|-------|-------------|-------|-------------|
| BC020402 | 0,01  | 0,996233334 | -0,09 | 0,876503933 | 0,44  | 0,492973363 | -0,49 | 0,321541431 | -0,5  | 0,317687905 |
| BC021614 | -0,37 | 0,310965981 | -0,09 | 0,910284662 | 0,81  | 0,342804036 | 2,45  | 0,01346145  | 0,42  | 0,587011728 |
| BC021767 | -0,07 | 0,945042239 | 0,01  | 0,992585488 | -0,16 | 0,904057901 | 0,09  | 0,810891431 | -0,01 | 0,993413582 |
| BC021891 | 0,41  | 0,407591936 | 0     | 0,999395995 | -0,2  | 0,770526999 | 0,7   | 0,140538478 | -0,06 | 0,950308536 |
| BC022687 | -0,44 | 0,637411708 | 0,49  | 0,517288934 | 0,5   | 0,552461756 | -0,16 | 0,81394192  | -0,43 | 0,481524365 |
| BC023105 | 1,52  | 0,132709492 | 0,51  | 0,321992901 | -1,32 | 0,055398111 | 0,02  | 0,981057922 | 1,24  | 0,058814936 |
| BC023719 | 0,3   | 0,737256032 | -0,26 | 0,620803951 | 0,03  | 0,974628464 | 0,06  | 0,884707915 | -0,27 | 0,6818898   |
| BC023829 | -0,05 | 0,943538971 | -0,21 | 0,612645853 | -0,32 | 0,703372614 | 0,12  | 0,83420397  | -0,28 | 0,715928244 |
| BC024139 | 0,35  | 0,433427344 | 0     | 0,999210601 | -0,18 | 0,800555491 | -0,18 | 0,696746088 | -0,21 | 0,786434393 |
| BC024386 | -0,19 | 0,701048903 | -0,04 | 0,948597122 | -0,14 | 0,840187016 | 0,12  | 0,878239453 | 0,02  | 0,985982505 |
| BC024978 | 0,26  | 0,75819156  | 0,02  | 0,986782918 | 0,26  | 0,661089127 | -0,27 | 0,576859946 | 0,11  | 0,950056013 |
| BC025446 | 0,11  | 0,858269816 | -0,04 | 0,961709816 | -0,33 | 0,716743339 | 0,31  | 0,577799811 | -0,01 | 0,992694729 |
| BC025920 | -0,13 | 0,791225618 | 0,1   | 0,932292974 | -0,36 | 0,562677627 | -0,03 | 0,972656417 | -0,28 | 0,763240477 |
| BC026585 | -0,28 | 0,633127066 | 0,03  | 0,970832543 | -0,06 | 0,963551811 | -0,21 | 0,646950929 | -0,3  | 0,742069647 |
| BC027072 | 0,25  | 0,629458832 | -0,43 | 0,545116169 | -0,09 | 0,923135714 | 0,32  | 0,520512304 | -0,05 | 0,961406182 |
| BC028471 | -0,25 | 0,742089645 | -0,09 | 0,956049982 | 0,18  | 0,846135198 | 0,06  | 0,958889858 | -0,01 | 0,991559961 |
| BC028528 | -0,03 | 0,957427783 | -0,1  | 0,882918801 | 0,03  | 0,977827235 | 1,09  | 0,118847866 | -0,8  | 0,340006862 |
| BC028777 | -0,01 | 0,990894139 | 0,11  | 0,881138991 | 0,09  | 0,912371358 | -0,2  | 0,667849424 | 0,2   | 0,765340194 |
| BC029214 | 0,04  | 0,95718608  | -0,22 | 0,88899358  | -0,08 | 0,904057901 | -0,73 | 0,136046497 | -0,57 | 0,406605038 |
| BC029722 | 0,38  | 0,716161525 | 0,1   | 0,952099316 | 0,27  | 0,607318275 | -0,39 | 0,437940337 | 0,02  | 0,982779069 |
| BC030336 | -0,09 | 0,882943798 | 0,18  | 0,678944484 | -0,41 | 0,395304536 | -0,42 | 0,444591744 | 0,12  | 0,890957032 |
| BC030499 | -0,08 | 0,964272364 | 0,53  | 0,731621986 | -1,34 | 0,141461562 | -0,93 | 0,391465744 | -0,99 | 0,330057248 |
| BC030500 | -0,11 | 0,907748757 | 0,28  | 0,842793123 | -0,44 | 0,575554281 | 0,16  | 0,813612209 | -0,07 | 0,956610289 |
| BC030867 | -0,62 | 0,306829062 | -0,67 | 0,304034247 | 0,54  | 0,271482188 | 0,93  | 0,142452679 | 0,09  | 0,928724353 |
| BC030870 | -0,14 | 0,838892004 | 0,04  | 0,970832543 | 0,03  | 0,967304745 | -0,14 | 0,771388917 | 0,14  | 0,87343011  |
| BC031181 | 0,16  | 0,786786652 | 0,11  | 0,794036677 | -0,13 | 0,846689137 | -0,06 | 0,886071047 | -0,24 | 0,694233384 |
| BC031361 | 0,21  | 0,700221543 | 0,51  | 0,517778851 | -0,08 | 0,928065911 | -0,5  | 0,420894607 | 0,4   | 0,493919589 |
| BC034090 | 0,14  | 0,9023969   | -0,01 | 0,999395995 | -0,16 | 0,858001959 | -0,73 | 0,536277668 | -0,79 | 0,525018839 |
| BC034902 | 0,37  | 0,386379088 | 0,01  | 0,997344247 | -0,7  | 0,193145507 | 0,02  | 0,979829655 | 0,11  | 0,930575749 |
| BC035044 | 0,16  | 0,761716597 | -0,08 | 0,857503073 | -0,09 | 0,877598693 | -0,12 | 0,85301747  | -0,07 | 0,947257087 |
| BC035947 | -0,03 | 0,956452501 | -0,2  | 0,729172466 | -0,08 | 0,921119153 | 0,27  | 0,441201512 | -0,01 | 0,9939542   |
| BC037032 | 0,03  | 0,980635616 | 0     | 1           | 0,25  | 0,70635953  | 0,05  | 0,957427513 | -0,6  | 0,436708262 |
| BC037034 | 0,05  | 0,959458865 | -0,47 | 0,532629904 | 0,5   | 0,628142669 | 0,51  | 0,422943572 | -0,31 | 0,735152891 |
| BC037438 | 0,08  | 0,936871609 | -0,47 | 0,558993973 | -0,04 | 0,967767582 | 0,44  | 0,666316377 | 0,22  | 0,751718552 |
| BC037704 | 0,02  | 0,98456417  | -0,05 | 0,966717367 | -0,29 | 0,658477739 | -1,23 | 0,1122689   | -0,4  | 0,675021583 |

|          |       |             |       |             |       |             |       |             |       |             |
|----------|-------|-------------|-------|-------------|-------|-------------|-------|-------------|-------|-------------|
| BC039771 | 0     | 0,996219097 | 0,05  | 0,919841135 | -0,13 | 0,822852885 | -0,06 | 0,91152705  | -0,02 | 0,981079016 |
| BC039966 | -0,29 | 0,622436248 | 0,11  | 0,825120426 | 0,12  | 0,823823322 | -0,09 | 0,850309966 | -0,36 | 0,576337996 |
| BC043934 | 0,21  | 0,56461489  | 0,01  | 0,997344247 | -0,02 | 0,973802765 | -0,38 | 0,299182807 | -0,53 | 0,33353181  |
| BC046251 | -0,25 | 0,661336918 | -0,01 | 0,990088847 | -0,17 | 0,814066398 | 0     | 0,99962598  | 0,08  | 0,927536545 |
| BC046401 | 0,22  | 0,633989663 | 0,13  | 0,793603525 | -0,05 | 0,964509282 | 0,22  | 0,612792072 | 0,13  | 0,864373858 |
| BC048403 | 0,37  | 0,597519827 | -0,08 | 0,910688765 | -0,54 | 0,436626688 | -0,37 | 0,288067607 | -0,24 | 0,76521225  |
| BC048502 | 0,28  | 0,692490424 | -0,2  | 0,693906911 | 0,1   | 0,908390194 | 0,04  | 0,96847881  | 0,03  | 0,983469081 |
| BC048507 | -0,59 | 0,602160482 | 0,17  | 0,861862086 | 1,22  | 0,060293803 | -0,14 | 0,780675133 | 0,3   | 0,730951829 |
| BC048546 | -0,21 | 0,757499328 | 0,11  | 0,912137323 | -0,23 | 0,813287877 | -0,19 | 0,740451724 | -0,48 | 0,42351018  |
| BC048562 | -0,36 | 0,38528369  | 0,04  | 0,976594855 | -0,18 | 0,878636183 | 0,72  | 0,174662697 | 0,17  | 0,871876889 |
| BC048594 | 0,13  | 0,834886413 | -0,11 | 0,869515524 | -0,24 | 0,872313115 | -0,67 | 0,543829463 | -0,17 | 0,917844354 |
| BC048602 | 0,34  | 0,546019769 | 0,12  | 0,804543872 | -0,4  | 0,542385406 | 0,13  | 0,849190278 | -0,21 | 0,820657685 |
| BC048609 | -0,43 | 0,558440576 | 0,11  | 0,906777728 | 0,07  | 0,950076566 | 0,07  | 0,920094781 | -0,26 | 0,74506541  |
| BC048644 | 0,09  | 0,842326483 | 0,08  | 0,928920047 | -0,11 | 0,840541537 | 0,05  | 0,925025576 | -0,02 | 0,983469081 |
| BC048671 | 0,73  | 0,189684245 | 0,02  | 0,990380046 | -0,52 | 0,484661972 | 0,01  | 0,980883383 | 0,08  | 0,934344891 |
| BC048679 | -0,3  | 0,422033372 | -0,06 | 0,928134372 | 0     | 0,998080686 | 0,02  | 0,971338071 | 0,21  | 0,770769597 |
| BC049265 | 0,06  | 0,924973401 | -0,34 | 0,35381781  | -0,21 | 0,733053207 | 0,21  | 0,682210385 | -0,03 | 0,979152939 |
| BC049352 | 0,22  | 0,820023436 | -0,08 | 0,97291119  | 0,15  | 0,899771478 | 1     | 0,20602105  | 0,2   | 0,839474287 |
| BC049692 | 0,05  | 0,975949545 | -0,07 | 0,989873399 | -0,46 | 0,81820534  | 0,33  | 0,77372709  | -0,86 | 0,507222763 |
| BC049702 | -0,06 | 0,944291635 | -0,13 | 0,839789639 | -0,29 | 0,691268573 | 0,34  | 0,490835105 | -0,05 | 0,968799126 |
| BC049715 | 0,25  | 0,701627731 | 0,13  | 0,869553    | 0,25  | 0,803963753 | 0,04  | 0,926085733 | 0,05  | 0,96176496  |
| BC049730 | 0,05  | 0,963228289 | -0,05 | 0,932292974 | 0,19  | 0,713746744 | -0,01 | 0,989790023 | 0,13  | 0,844213516 |
| BC049762 | -0,26 | 0,574398567 | -0,35 | 0,377669413 | -0,14 | 0,897932497 | 0,47  | 0,350852228 | 0,21  | 0,833976816 |
| BC050972 | 0,54  | 0,328119497 | 0     | 1           | 0,03  | 0,96551342  | 0,19  | 0,683901621 | 0,36  | 0,524829864 |
| BC051019 | -0,07 | 0,910211895 | 0,04  | 0,970020205 | 0     | 0,999931921 | 0,08  | 0,899003207 | -0,03 | 0,978604922 |
| BC051076 | 0,32  | 0,348336283 | -0,06 | 0,921036877 | -0,06 | 0,935887545 | -0,02 | 0,960885529 | -0,09 | 0,912683275 |
| BC051077 | 0,12  | 0,87282087  | 0,09  | 0,897574732 | 0,32  | 0,512312279 | -0,13 | 0,829087694 | 0,07  | 0,943668392 |
| BC051142 | -0,06 | 0,959985598 | 0,24  | 0,853247128 | -0,15 | 0,862246043 | -0,48 | 0,655202878 | 0,96  | 0,424134691 |
| BC051226 | -0,23 | 0,585780254 | -0,2  | 0,667684858 | -0,48 | 0,258028442 | 0,06  | 0,884326814 | 0,07  | 0,940438527 |
| BC051537 | 0,28  | 0,698332739 | -0,07 | 0,957348889 | -0,18 | 0,720590502 | -0,15 | 0,75622456  | 0,35  | 0,646022757 |
| BC051628 | 0,11  | 0,865776054 | -0,42 | 0,413220409 | 0,13  | 0,86935713  | -1,01 | 0,072972272 | -0,95 | 0,08920403  |
| BC051665 | 0,06  | 0,96177183  | -0,55 | 0,292069687 | -0,55 | 0,293468784 | 0,51  | 0,139474809 | 0,15  | 0,836697963 |
| BC052040 | 0,07  | 0,965991176 | 0,31  | 0,615311543 | 0,14  | 0,903948251 | -1,85 | 0,01842722  | -0,35 | 0,606740281 |
| BC052688 | 0,02  | 0,979006273 | -0,28 | 0,832686271 | -0,2  | 0,739945591 | 0,15  | 0,85072326  | 0,25  | 0,695556052 |
| BC053393 | 0,01  | 0,993175772 | 0,31  | 0,609632892 | -0,41 | 0,591404136 | -0,18 | 0,694650822 | -0,03 | 0,983713871 |

|          |       |             |       |             |       |             |       |             |       |             |
|----------|-------|-------------|-------|-------------|-------|-------------|-------|-------------|-------|-------------|
| BC055324 | 0,16  | 0,867243066 | -1,03 | 0,310525594 | 1,6   | 0,202473029 | 0,47  | 0,647512496 | -0,74 | 0,55254983  |
| BC055402 | 0,07  | 0,900892804 | -0,12 | 0,861884077 | -0,08 | 0,918291931 | 0,54  | 0,154588425 | 0,25  | 0,723861142 |
| BC061237 | -0,37 | 0,464939452 | 0,7   | 0,345535775 | -0,16 | 0,863043834 | -0,38 | 0,451721309 | 0,24  | 0,684349871 |
| BC064078 | 0,2   | 0,738676622 | 0,28  | 0,547180632 | 0,04  | 0,970969012 | 0,11  | 0,834736527 | 0,16  | 0,846526184 |
| BC065397 | 0,39  | 0,618093813 | -0,09 | 0,935329426 | -0,2  | 0,884553705 | -0,61 | 0,36963992  | 0,47  | 0,623304657 |
| BC065403 | 0,08  | 0,90742841  | 0,45  | 0,501438027 | 0,12  | 0,902672106 | -0,2  | 0,81720595  | -0,21 | 0,748678485 |
| BC067074 | -0,09 | 0,903817676 | -0,29 | 0,669154864 | -0,51 | 0,387489243 | 0,16  | 0,722307071 | 0,12  | 0,904684159 |
| BC068281 | 0,09  | 0,904709865 | 0,19  | 0,783487161 | 0,27  | 0,599585318 | -0,48 | 0,225020537 | -0,03 | 0,980961333 |
| BC080695 | -0,34 | 0,481677041 | 0,45  | 0,354667412 | 0,11  | 0,910991892 | -0,24 | 0,554988456 | -0,07 | 0,947584441 |
| BC089491 | 0,11  | 0,913425276 | 0,16  | 0,824853794 | 0,01  | 0,995401448 | 0,2   | 0,546558562 | 0,41  | 0,504201737 |
| BC089597 | 0,4   | 0,287459734 | -0,07 | 0,933941404 | 0,36  | 0,648224778 | -0,5  | 0,293243809 | 0,21  | 0,914498972 |
| BC094916 | 0,31  | 0,729202777 | 0,77  | 0,556442436 | -0,46 | 0,512398053 | -0,07 | 0,90213506  | -0,06 | 0,954892212 |
| BC100451 | -0,17 | 0,800023642 | -0,24 | 0,816121519 | 0,39  | 0,777568498 | 0,16  | 0,779558647 | 0,05  | 0,977236465 |
| BC100530 | 0,11  | 0,823462545 | -0,16 | 0,874195024 | 0,08  | 0,911634383 | 0,14  | 0,736730464 | 0,29  | 0,674861155 |
| BC106175 | 0,31  | 0,497555755 | 0,17  | 0,804868131 | -0,02 | 0,989336214 | -0,15 | 0,798893106 | 0,09  | 0,952296554 |
| BC106179 | 0,02  | 0,982480253 | 0,25  | 0,74245372  | 0,26  | 0,757306958 | -0,08 | 0,87613802  | -0,15 | 0,845142293 |
| BC107364 | 0,25  | 0,774822327 | -0,54 | 0,476383101 | 0,16  | 0,895520077 | 0,18  | 0,611632616 | 0,12  | 0,845642121 |
| BC117090 | -0,1  | 0,955200574 | 0,35  | 0,862153944 | 0,05  | 0,984879454 | -0,56 | 0,365195906 | 0,73  | 0,217859301 |
| BC147527 | -0,43 | 0,264905455 | -0,46 | 0,599353083 | 0,14  | 0,902637441 | 0     | 0,999793787 | -0,29 | 0,729788112 |
| Bcam     | -0,34 | 0,471408054 | -0,25 | 0,587634717 | 0,1   | 0,907028836 | -2,1  | 0,005176161 | -0,25 | 0,646672171 |
| Bcan     | -0,29 | 0,647271981 | -0,02 | 0,985151214 | -0,17 | 0,864411302 | -0,11 | 0,813711032 | -0,32 | 0,563213699 |
| Bcap29   | -0,97 | 0,153575717 | -0,62 | 0,44159262  | 0,63  | 0,651101233 | -0,19 | 0,909976349 | -0,15 | 0,932268703 |
| Bcap31   | 0,14  | 0,707070061 | -0,02 | 0,981586987 | 0,17  | 0,823823322 | 0     | 0,999811182 | 0,04  | 0,968038677 |
| Bcar1    | -0,22 | 0,645863119 | 0,31  | 0,57952147  | 0,28  | 0,618146048 | -0,28 | 0,575297022 | -0,03 | 0,979643119 |
| Bcar3    | 0,05  | 0,94881239  | 0,33  | 0,673542391 | -0,53 | 0,551995502 | 0,39  | 0,763366023 | 1,12  | 0,271713687 |
| Bcas1    | -0,01 | 0,996998625 | 0,03  | 0,98230594  | -0,01 | 0,995985283 | 0,71  | 0,204370449 | 0,33  | 0,566248044 |
| Bcas1os2 | 0,16  | 0,790580834 | -0,03 | 0,981853964 | -0,09 | 0,94930407  | 0,6   | 0,48546658  | 0,24  | 0,673245336 |
| Bcas2    | 0,04  | 0,964272364 | -0,49 | 0,511081219 | 0,38  | 0,530318769 | 0,3   | 0,604127556 | 0,21  | 0,739804907 |
| Bcas3    | -0,19 | 0,799807765 | -0,18 | 0,786394409 | 0,21  | 0,824752217 | -0,16 | 0,743093921 | -0,46 | 0,582411164 |
| Bcas3os1 | -0,06 | 0,932324918 | 0,07  | 0,928402591 | -0,38 | 0,539473373 | -0,58 | 0,490176405 | 0,04  | 0,982175252 |
| Bcas3os2 | -0,05 | 0,963329626 | 0,45  | 0,615058004 | 0,01  | 0,99394877  | 0,4   | 0,555857861 | -0,07 | 0,932846086 |
| Bcat1    | -0,02 | 0,989536427 | 0,19  | 0,81188891  | -0,06 | 0,960285359 | 1,12  | 0,039739447 | 0,2   | 0,759682279 |
| Bcat2    | -0,13 | 0,866720868 | 0,27  | 0,568304052 | -0,06 | 0,969570532 | 0,5   | 0,2484156   | 0,29  | 0,786979275 |
| Bccip    | -0,48 | 0,180356049 | -0,44 | 0,390751508 | 0,2   | 0,861567666 | 0,38  | 0,382025024 | -0,22 | 0,740069683 |
| Bcdin3d  | -0,3  | 0,758721455 | 0,17  | 0,832117565 | 0,34  | 0,757498725 | -0,28 | 0,505160623 | -0,14 | 0,894623317 |



|         |       |             |       |             |       |             |       |             |       |             |
|---------|-------|-------------|-------|-------------|-------|-------------|-------|-------------|-------|-------------|
| Bche    | -0,08 | 0,935203545 | 0,3   | 0,720990608 | -0,04 | 0,974836642 | -0,24 | 0,740889124 | -0,03 | 0,979456872 |
| Bckdha  | -0,4  | 0,373935464 | -0,3  | 0,684980945 | 0,53  | 0,665249213 | -0,19 | 0,559653635 | -0,43 | 0,521776411 |
| Bckdhb  | -0,61 | 0,343763562 | -0,58 | 0,45420995  | 0,7   | 0,259585201 | 0,19  | 0,707865877 | -0,74 | 0,166187239 |
| Bckdk   | -0,6  | 0,655624944 | -0,18 | 0,873942925 | 1,14  | 0,35180566  | 0,38  | 0,591908615 | 0,08  | 0,934242963 |
| Bcl10   | 0,28  | 0,54514459  | 0,21  | 0,599353083 | 0,15  | 0,872180056 | 1,02  | 0,027627599 | -0,12 | 0,932268703 |
| Bcl11a  | -0,28 | 0,594646081 | 0,02  | 0,989327073 | -0,36 | 0,453446323 | 0,14  | 0,832134224 | -0,17 | 0,835191    |
| Bcl11b  | -0,14 | 0,793710109 | -0,04 | 0,963095468 | -0,18 | 0,777918093 | 0,32  | 0,674325331 | 0,21  | 0,861977667 |
| Bcl2    | -0,7  | 0,220541198 | -0,76 | 0,224596043 | 0,51  | 0,598179126 | 1,11  | 0,154581191 | 0,17  | 0,891375716 |
| Bcl2a1a | 0,74  | 0,337173147 | -0,15 | 0,932338539 | 1,01  | 0,70635953  | 0,38  | 0,792595018 | 0,26  | 0,855741842 |
| Bcl2a1b | -0,58 | 0,702313432 | -0,47 | 0,790939978 | -1,52 | 0,096515102 | -0,08 | 0,955808624 | -0,09 | 0,948163009 |
| Bcl2a1c | 0,29  | 0,635690098 | 0,44  | 0,525626411 | 0,09  | 0,941063967 | -0,38 | 0,430092953 | 0,25  | 0,765762541 |
| Bcl2l1  | 0,18  | 0,758636946 | -0,05 | 0,9369583   | -0,43 | 0,563934293 | -1,17 | 0,131032989 | -0,92 | 0,271576025 |
| Bcl2l10 | -0,02 | 0,976574175 | -0,27 | 0,678753304 | 0,12  | 0,856246709 | 0,3   | 0,539425652 | -0,01 | 0,992607235 |
| Bcl2l11 | 0,36  | 0,545805455 | 0,11  | 0,89474699  | -0,11 | 0,920825845 | 1,5   | 0,023054096 | -0,12 | 0,885777129 |
| Bcl2l12 | -0,02 | 0,972180409 | -0,33 | 0,584125383 | -0,32 | 0,61483831  | 0,22  | 0,686014055 | -0,06 | 0,953056817 |
| Bcl2l13 | -0,21 | 0,779920475 | -0,09 | 0,936502479 | 0,26  | 0,783749875 | 0,21  | 0,856184745 | 0,01  | 0,995930023 |
| Bcl2l14 | 0,13  | 0,874676538 | -0,06 | 0,950001985 | -0,19 | 0,823823322 | 0,22  | 0,711746438 | 0,11  | 0,922709938 |
| Bcl2l15 | 0,25  | 0,801665973 | -0,25 | 0,817110093 | 0,02  | 0,991107468 | 0,72  | 0,106060853 | 0,46  | 0,395115041 |
| Bcl2l2  | 0,23  | 0,75052114  | -0,12 | 0,812664394 | 0,24  | 0,772397144 | 0,27  | 0,600977706 | 0,31  | 0,740020498 |
| Bcl3    | 0,42  | 0,239601221 | 0,37  | 0,548847572 | 0,07  | 0,932577939 | -0,26 | 0,673173015 | 0,25  | 0,728483022 |
| Bcl6    | 0,29  | 0,846840544 | 0,62  | 0,487771533 | 0,38  | 0,713620433 | -0,9  | 0,066524162 | 0,58  | 0,208771188 |
| Bcl6b   | -0,12 | 0,764189777 | 0,25  | 0,625418479 | 0,22  | 0,675047768 | 0,86  | 0,080032206 | 0,42  | 0,437625388 |
| Bcl7a   | 0,17  | 0,829299665 | -0,61 | 0,393855735 | 0,26  | 0,712697139 | -1,56 | 0,035124962 | -0,39 | 0,633801825 |
| Bcl7b   | 0,11  | 0,889013209 | 0,1   | 0,891627071 | -0,03 | 0,974856067 | -0,15 | 0,669860197 | 0,2   | 0,755677288 |
| Bcl7c   | -0,06 | 0,948926586 | -0,09 | 0,930253753 | -0,27 | 0,702448924 | -0,05 | 0,957427513 | 0,02  | 0,991559961 |
| Bcl9    | -0,17 | 0,757032046 | 0,35  | 0,487477927 | 0,4   | 0,688126003 | -0,21 | 0,630104458 | 0,75  | 0,094398721 |
| Bcl9l   | -0,47 | 0,298209271 | 0,08  | 0,934294134 | 0,43  | 0,570233796 | -0,98 | 0,18458304  | -0,16 | 0,825871709 |
| Bclaf1  | -0,09 | 0,858748956 | -0,19 | 0,611052267 | 0,13  | 0,83171127  | 0,37  | 0,702534189 | 0,25  | 0,838061344 |
| Bco1    | 0,24  | 0,728516314 | -0,42 | 0,435223036 | -0,1  | 0,924196538 | 0,41  | 0,371970704 | 0,07  | 0,948163009 |
| Bco2    | 0,26  | 0,54401985  | -0,2  | 0,806456132 | -0,17 | 0,863833849 | -0,19 | 0,744701893 | -0,25 | 0,792404969 |
| Bcor    | 0,33  | 0,597519827 | 0,37  | 0,615311543 | -0,31 | 0,656878693 | -0,23 | 0,6282575   | 0,1   | 0,899196564 |
| Bcorl1  | -0,28 | 0,634151103 | 0     | 1           | 0,35  | 0,475629395 | 0,54  | 0,564624106 | 0,4   | 0,726687847 |
| Bcr     | -0,29 | 0,498030624 | -0,14 | 0,775914311 | -0,31 | 0,473499244 | 0,92  | 0,053460395 | 0,08  | 0,918465043 |
| Bcs1l   | -0,34 | 0,783591449 | -0,36 | 0,462629989 | 0,16  | 0,906097666 | 0,57  | 0,146784762 | 0,13  | 0,893715127 |
| Bdh1    | 0,02  | 0,986795639 | 0,11  | 0,825210924 | -0,08 | 0,943365715 | -0,34 | 0,323689065 | -0,38 | 0,493595965 |

|          |       |             |       |             |       |             |       |             |       |             |
|----------|-------|-------------|-------|-------------|-------|-------------|-------|-------------|-------|-------------|
| Bdh2     | -0,1  | 0,8634587   | -0,26 | 0,656204868 | 0,28  | 0,727100456 | -0,69 | 0,465171044 | 0,01  | 0,9939542   |
| Bdkrb1   | -0,1  | 0,959466597 | -0,04 | 0,985764487 | 0,32  | 0,740220539 | 0,86  | 0,357167871 | 0,16  | 0,84147389  |
| Bdkrb2   | -0,58 | 0,178589155 | -0,19 | 0,842793123 | -0,04 | 0,964509282 | 1,14  | 0,176064655 | -0,95 | 0,169601895 |
| Bdnf     | -0,17 | 0,744352714 | 0,18  | 0,717052006 | -0,42 | 0,366128799 | -0,19 | 0,711746438 | -0,06 | 0,963903981 |
| Bdp1     | -0,02 | 0,981669483 | 0,12  | 0,818613446 | 0,15  | 0,865145801 | 0,01  | 0,985865561 | 0,28  | 0,678938588 |
| BE692007 | -0,27 | 0,504081209 | -0,31 | 0,582478031 | 0,02  | 0,982984296 | 0,15  | 0,684777287 | 0,1   | 0,888858935 |
| BE949265 | -0,32 | 0,567790521 | 0,1   | 0,912535732 | -0,08 | 0,897233315 | -0,08 | 0,910640253 | 0,33  | 0,63620555  |
| Bean1    | -0,14 | 0,862360472 | 0,19  | 0,872388615 | 0,15  | 0,809137779 | 1,05  | 0,298407511 | -0,05 | 0,972231257 |
| Becn1    | -0,31 | 0,617280733 | 0,42  | 0,6208481   | 0,09  | 0,955761087 | -0,09 | 0,884352208 | -0,18 | 0,812745094 |
| Begain   | -0,17 | 0,794318183 | 0,19  | 0,831404974 | -0,32 | 0,517379736 | -0,21 | 0,758588473 | -0,06 | 0,952971656 |
| Bend3    | -0,25 | 0,651614017 | -0,19 | 0,853162838 | 0,35  | 0,533790057 | -0,1  | 0,89461226  | 0     | 0,998184923 |
| Bend4    | -0,24 | 0,778869381 | -0,85 | 0,585443341 | 0,47  | 0,580049353 | 1,89  | 0,013836074 | 0,36  | 0,74933755  |
| Bend5    | 0,43  | 0,657670764 | -0,28 | 0,88483892  | 0,13  | 0,946627221 | -0,11 | 0,831151724 | 0,24  | 0,864373858 |
| Bend6    | -0,53 | 0,470166881 | -0,75 | 0,508850947 | -0,17 | 0,920926565 | 2,16  | 0,013556826 | 0,53  | 0,512907543 |
| Bend7    | -0,32 | 0,757032046 | -0,68 | 0,254708337 | -0,19 | 0,938317564 | -0,23 | 0,597331286 | -0,07 | 0,935708361 |
| Best1    | -0,17 | 0,683444889 | -0,1  | 0,910955776 | 0,37  | 0,397324055 | -1,48 | 0,075379341 | -1    | 0,197214574 |
| Best2    | 0,41  | 0,652385491 | 0,41  | 0,581950526 | 0,15  | 0,791940256 | 0,11  | 0,768620889 | 0,08  | 0,914498972 |
| Best3    | 0,14  | 0,839881823 | 0,16  | 0,826814267 | -0,1  | 0,911634383 | -0,1  | 0,900530968 | -0,07 | 0,94946865  |
| Bet1     | 0,15  | 0,862213586 | -0,6  | 0,589266926 | -0,24 | 0,805435479 | 0,79  | 0,363947177 | -0,05 | 0,970154126 |
| Bet1l    | 0,01  | 0,989925592 | -0,17 | 0,747707816 | -0,25 | 0,714907683 | -0,47 | 0,148514477 | -0,06 | 0,939248399 |
| Bex1     | 0,16  | 0,744352714 | -0,14 | 0,781934928 | -0,11 | 0,87140695  | -0,51 | 0,599213254 | -0,6  | 0,499998316 |
| Bex2     | 0,3   | 0,381895665 | -0,13 | 0,810418074 | -0,16 | 0,808065828 | 0,25  | 0,671932624 | 0,16  | 0,829437698 |
| Bex4     | 0,22  | 0,606922012 | 0,06  | 0,89647435  | -0,34 | 0,632673506 | -0,05 | 0,899737654 | -0,13 | 0,898821988 |
| Bex6     | 0,4   | 0,653178836 | 0,49  | 0,291972553 | 0,03  | 0,982305856 | -0,11 | 0,884326814 | -0,03 | 0,979456872 |
| Bfar     | 0,28  | 0,475761281 | 0,02  | 0,988550087 | -0,56 | 0,391222812 | 0,14  | 0,819940884 | 0,04  | 0,974803886 |
| Bfsp1    | -0,36 | 0,419591944 | 0,51  | 0,339372592 | 0,38  | 0,561834635 | -0,14 | 0,762176736 | -0,01 | 0,993413582 |
| Bfsp2    | -0,04 | 0,950837484 | 0,01  | 1           | 0,27  | 0,822554757 | 0,34  | 0,472803467 | 0,16  | 0,852954345 |
| Bglap    | 0,11  | 0,850491134 | -0,2  | 0,695689103 | 0,11  | 0,873980509 | 0,03  | 0,952549047 | -0,17 | 0,768823429 |
| Bglap2   | 0,47  | 0,808097659 | 0,58  | 0,705845461 | 0,14  | 0,95136091  | -0,26 | 0,622236905 | -0,44 | 0,561760517 |
| Bgn      | -0,69 | 0,214430522 | -0,05 | 0,952099316 | -0,15 | 0,808065828 | -1,72 | 0,010957756 | -0,43 | 0,411828104 |
| Bhlha15  | -0,29 | 0,515030131 | -0,04 | 0,946864476 | -0,25 | 0,785676028 | 0,06  | 0,920158794 | 0,03  | 0,979643119 |
| Bhlha9   | 0,07  | 0,932671813 | -0,15 | 0,825210924 | 0,12  | 0,90345282  | -0,14 | 0,765822989 | -0,13 | 0,887894733 |
| Bhlhb9   | -0,19 | 0,813824216 | -0,06 | 0,970437908 | -0,12 | 0,921400372 | 0,1   | 0,874701048 | 1,1   | 0,363127424 |
| Bhlhe22  | 0,26  | 0,7528306   | 0,37  | 0,632756037 | 0,07  | 0,940489823 | -0,44 | 0,327156631 | -0,03 | 0,976743304 |
| Bhlhe23  | -0,26 | 0,664017318 | 0,07  | 0,923402647 | 0,26  | 0,715497532 | 0,27  | 0,631652163 | 0,05  | 0,969617491 |

|           |       |             |       |             |       |             |       |             |       |             |
|-----------|-------|-------------|-------|-------------|-------|-------------|-------|-------------|-------|-------------|
| Bhlhe40   | 0,18  | 0,718996404 | -0,06 | 0,932628106 | 0,17  | 0,783424344 | -0,06 | 0,954910308 | -0,4  | 0,639431703 |
| Bhlhe41   | -0,26 | 0,7494877   | -0,08 | 0,894557207 | 0,51  | 0,43434836  | -0,13 | 0,869535136 | 0,25  | 0,74324214  |
| Bhmt      | 0,46  | 0,238140392 | 0,06  | 0,946885634 | -0,21 | 0,767492577 | -0,15 | 0,780675133 | 0,13  | 0,859663155 |
| Bhmt2     | 0,21  | 0,662948451 | 0,24  | 0,703558337 | 0,11  | 0,874666506 | 0,16  | 0,793438229 | 0,17  | 0,861977667 |
| Bicc1     | -0,16 | 0,831656655 | 0,27  | 0,667097376 | -0,29 | 0,727262258 | 1,11  | 0,10235621  | -0,39 | 0,617249007 |
| Bicd1     | -0,03 | 0,976808481 | 0,61  | 0,2432648   | -0,16 | 0,811187914 | -0,97 | 0,19354502  | 0,32  | 0,745934858 |
| Bicd2     | -0,65 | 0,187534389 | -0,4  | 0,385935063 | 0,43  | 0,493193538 | -0,07 | 0,897334554 | -0,47 | 0,466753993 |
| Bid       | 0,11  | 0,862360472 | 0,6   | 0,230688117 | -0,1  | 0,943144399 | 0,46  | 0,217079936 | 1,53  | 0,008397664 |
| Bik       | -0,41 | 0,376151377 | -0,39 | 0,388579184 | 0,07  | 0,939252014 | 0,29  | 0,578090005 | -0,21 | 0,793839436 |
| Bin1      | -0,98 | 0,155659036 | -0,48 | 0,525834836 | 0,6   | 0,540090307 | 0,86  | 0,334699048 | -0,22 | 0,8736151   |
| Bin2      | 0,53  | 0,443047489 | 0,47  | 0,654719935 | -0,37 | 0,777417583 | -0,05 | 0,9704566   | -0,19 | 0,916530193 |
| Bin3      | -0,71 | 0,156158686 | -0,26 | 0,586775333 | -0,55 | 0,154586266 | 0,04  | 0,932489351 | -0,22 | 0,684349871 |
| Birc2     | 0,39  | 0,482077988 | 0,79  | 0,322806958 | 0,12  | 0,952888594 | 0,17  | 0,870146827 | 1,16  | 0,119856586 |
| Birc3     | 0,51  | 0,424550317 | 0,95  | 0,180373449 | -0,28 | 0,732540375 | 0,33  | 0,630512659 | 0,32  | 0,655912577 |
| Birc5     | -1,78 | 0,144707871 | -1,92 | 0,179411793 | 2,28  | 0,042643426 | 3,28  | 0,019526471 | -0,52 | 0,621207762 |
| Birc6     | -0,26 | 0,494884125 | -0,11 | 0,83670177  | 0,13  | 0,829099961 | 0,09  | 0,87148686  | -0,1  | 0,903241997 |
| Birc7     | 0,09  | 0,909291259 | 0,38  | 0,541301427 | -0,26 | 0,737821076 | -0,29 | 0,699241845 | -0,47 | 0,557205756 |
| Bivm      | -0,44 | 0,611339325 | 0,19  | 0,82485467  | 1,13  | 0,242752144 | 0,15  | 0,896599656 | -0,35 | 0,735622087 |
| Blk       | -0,57 | 0,434641897 | 0,29  | 0,559577499 | -0,08 | 0,944078985 | 0,01  | 0,98423292  | 0,38  | 0,484862172 |
| Blm       | -0,95 | 0,316599006 | -1,12 | 0,314697645 | 1,5   | 0,148382962 | 1,39  | 0,164446341 | -0,2  | 0,865866242 |
| Blmh      | -0,51 | 0,328445973 | -0,34 | 0,653910717 | 0,25  | 0,797165207 | 0     | 0,996287679 | -0,51 | 0,320588885 |
| Blnk      | 0,24  | 0,594412087 | -0,19 | 0,912137323 | -0,02 | 0,984119559 | 0,42  | 0,5508774   | 0,26  | 0,712786855 |
| Bloc1s1   | 0,1   | 0,881136396 | 0,26  | 0,691974226 | -0,26 | 0,654987556 | -0,04 | 0,960747562 | -0,12 | 0,872998211 |
| Bloc1s2   | 0,15  | 0,783200207 | -0,07 | 0,900801202 | 0,11  | 0,891689344 | 0,27  | 0,40238013  | 0,13  | 0,875713596 |
| Bloc1s3   | -0,02 | 0,984133097 | 0     | 0,998685228 | 0,23  | 0,763286976 | -0,35 | 0,501038134 | -0,19 | 0,823098095 |
| Bloc1s4   | -0,37 | 0,617280733 | 0,03  | 0,966078321 | -0,03 | 0,976042637 | 0,26  | 0,640127733 | -0,06 | 0,955836352 |
| Bloc1s5   | -0,68 | 0,470397003 | -0,4  | 0,902056427 | 0,79  | 0,440550754 | -0,25 | 0,912228914 | 0,4   | 0,802027955 |
| Bloc1s6   | -0,51 | 0,57672557  | 0,73  | 0,626825146 | 0,56  | 0,777918093 | 0,46  | 0,660443663 | 1,49  | 0,024119434 |
| Bloc1s6os | -0,19 | 0,630558551 | -0,5  | 0,706671369 | 0,08  | 0,928115273 | 0,33  | 0,669653978 | -0,14 | 0,828278125 |
| Blvra     | -0,25 | 0,65558562  | -0,06 | 0,916176914 | -0,19 | 0,76937959  | 0,43  | 0,308218931 | 0,06  | 0,954657649 |
| Blvrb     | -0,3  | 0,673291416 | -0,2  | 0,765222557 | -0,47 | 0,589103152 | -0,81 | 0,384319247 | 0,06  | 0,97425848  |
| Blzf1     | -0,19 | 0,755234272 | -0,12 | 0,787322926 | 0,88  | 0,161469949 | 0,71  | 0,270207359 | -0,45 | 0,601753447 |
| Bmf       | -0,02 | 0,982877855 | 0,11  | 0,88483892  | 0,01  | 0,993379272 | -0,86 | 0,36159963  | -0,11 | 0,953822902 |
| Bmp1      | -0,36 | 0,532523475 | -0,4  | 0,550164999 | 0,65  | 0,142272657 | 1,57  | 0,046206622 | -0,42 | 0,654129233 |
| Bmp10     | -0,1  | 0,840882072 | -0,06 | 0,915727653 | -0,32 | 0,600679499 | -0,51 | 0,747854799 | -0,79 | 0,66875229  |

|        |       |             |       |             |       |             |       |             |       |             |
|--------|-------|-------------|-------|-------------|-------|-------------|-------|-------------|-------|-------------|
| Bmp15  | -0,98 | 0,14504251  | -0,43 | 0,290322318 | 0,35  | 0,684002106 | -0,26 | 0,672057557 | 0     | 0,998704075 |
| Bmp2   | 1,67  | 0,128385553 | 1,27  | 0,093211392 | -1,67 | 0,046000486 | 3,98  | 0,006194852 | 0,86  | 0,47756273  |
| Bmp2k  | 0,75  | 0,067204873 | 0,98  | 0,090262898 | -0,71 | 0,162456758 | 1,13  | 0,063241598 | 0,44  | 0,542009846 |
| Bmp3   | 0,48  | 0,494679097 | 0,27  | 0,767178812 | 0,38  | 0,702928613 | -0,11 | 0,894503389 | -0,62 | 0,212051906 |
| Bmp4   | 2     | 0,024858795 | 1,02  | 0,143349998 | 0,21  | 0,821033224 | 0,01  | 0,996209911 | 1,22  | 0,136651693 |
| Bmp5   | -0,21 | 0,781674999 | -0,14 | 0,918694468 | 0,14  | 0,850171327 | -0,39 | 0,535895689 | -0,3  | 0,790424343 |
| Bmp6   | -0,15 | 0,918758168 | -0,33 | 0,808498635 | -0,79 | 0,343594254 | -2,98 | 0,008795556 | -1,53 | 0,019059155 |
| Bmp7   | -0,42 | 0,504621759 | -0,09 | 0,896322235 | 0,48  | 0,663029337 | 0,35  | 0,490749995 | -0,12 | 0,9039404   |
| Bmp8a  | -0,59 | 0,462016742 | -0,13 | 0,923051261 | -0,13 | 0,90665     | 0,28  | 0,709757811 | 0,4   | 0,549449827 |
| Bmp8b  | 0,27  | 0,654363277 | -0,19 | 0,765325717 | -0,48 | 0,476781249 | 0,12  | 0,80341881  | -0,21 | 0,870167038 |
| Bmper  | 0,02  | 0,984124693 | -0,06 | 0,946537754 | -0,35 | 0,71018068  | -1,76 | 0,041009258 | -0,94 | 0,187714252 |
| Bmpr1a | 0,29  | 0,71726775  | 0,37  | 0,436556718 | 1,32  | 0,043735621 | 0,2   | 0,779547737 | 1,01  | 0,404727018 |
| Bmpr1b | 0,3   | 0,622541886 | 0,03  | 0,989873399 | -0,19 | 0,806102885 | 0,09  | 0,894609842 | 0,23  | 0,746431548 |
| Bmpr2  | -0,09 | 0,838220858 | -0,04 | 0,94021592  | 0,11  | 0,891782315 | -0,35 | 0,266659455 | -0,07 | 0,918077524 |
| Bms1   | -0,32 | 0,728516314 | -0,14 | 0,826290896 | 0,21  | 0,786838878 | -0,17 | 0,665933714 | -0,25 | 0,713599145 |
| Bmx    | -0,31 | 0,586458491 | -0,42 | 0,639906666 | -0,01 | 0,996286252 | -2,93 | 0,003907268 | -0,8  | 0,18003283  |
| Bmyc   | -0,12 | 0,820270238 | 0,13  | 0,787285346 | -0,24 | 0,725191296 | -0,2  | 0,584770669 | 0,13  | 0,9039404   |
| Bnc1   | 0,05  | 0,938003782 | -0,17 | 0,785573503 | -0,22 | 0,782022139 | 0,32  | 0,53378351  | 0,19  | 0,853880519 |
| Bnc2   | -0,48 | 0,592940873 | -0,62 | 0,510894317 | 0,35  | 0,801755243 | -0,34 | 0,703803198 | -0,21 | 0,848679763 |
| Bnip1  | -0,16 | 0,829299665 | 0,17  | 0,82505545  | -0,1  | 0,935887545 | -0,31 | 0,426802119 | -0,19 | 0,876714296 |
| Bnip2  | -0,01 | 0,988846353 | 0     | 1           | 0,17  | 0,849027937 | -0,26 | 0,677203644 | -0,37 | 0,666758661 |
| Bnip3  | 1,33  | 0,067204873 | 0,62  | 0,607752929 | -0,46 | 0,688643408 | 0,34  | 0,669934454 | -0,07 | 0,947901649 |
| Bnip3l | 0,18  | 0,676429707 | 0,11  | 0,84526289  | 0,06  | 0,961800548 | -0,24 | 0,420848492 | -0,35 | 0,429112259 |
| Bnipl  | 0,73  | 0,436084979 | 0,26  | 0,736703575 | -0,29 | 0,716743339 | -0,23 | 0,729857506 | -0,49 | 0,545134155 |
| Boc    | -0,09 | 0,92366013  | 0,16  | 0,774758897 | 0,01  | 0,993379272 | -3,27 | 0,00720411  | -0,14 | 0,887367245 |
| Bod1   | 0,25  | 0,55640978  | 0,23  | 0,748345069 | -0,18 | 0,803963753 | -0,1  | 0,893841279 | -0,59 | 0,428613647 |
| Bod1l  | 0,17  | 0,758094656 | 0,04  | 0,974580396 | 0,15  | 0,806102885 | -0,17 | 0,815995523 | 0,41  | 0,549450339 |
| Bok    | -0,74 | 0,263105607 | -1,04 | 0,098105096 | 0,6   | 0,235003402 | 1,07  | 0,021644799 | -0,64 | 0,159047845 |
| Bola1  | -0,04 | 0,973545171 | -0,09 | 0,930849936 | -0,09 | 0,927016405 | -0,4  | 0,291551173 | -0,14 | 0,85508146  |
| Bola2  | -0,12 | 0,805603729 | -0,22 | 0,658998976 | 0,2   | 0,763933957 | 1,47  | 0,020614785 | 0,22  | 0,731865047 |
| Bola3  | -0,03 | 0,97114796  | -0,12 | 0,90891146  | 0,17  | 0,777918093 | 0,9   | 0,177747639 | 0,35  | 0,7408747   |
| Boll   | -0,19 | 0,738448626 | -0,17 | 0,80097084  | -0,19 | 0,773365699 | 0,01  | 0,994269239 | -0,01 | 0,9939542   |
| Bop1   | -0,54 | 0,233500023 | -0,59 | 0,194990095 | 0,65  | 0,233719695 | 0,74  | 0,068895949 | -0,06 | 0,952971656 |
| Bora   | -0,69 | 0,143037124 | 0,22  | 0,728083849 | 0,86  | 0,308914223 | 1,62  | 0,024366222 | -0,11 | 0,948494058 |
| Borcs5 | -0,03 | 0,978126898 | -0,14 | 0,786394409 | 0,29  | 0,691786117 | 0,04  | 0,943143586 | 0,13  | 0,928724353 |

|         |       |             |       |             |       |             |       |             |       |             |
|---------|-------|-------------|-------|-------------|-------|-------------|-------|-------------|-------|-------------|
| Borcs6  | -0,04 | 0,935744129 | 0,31  | 0,514228058 | -0,03 | 0,976092199 | -0,29 | 0,397216038 | -0,2  | 0,742982183 |
| Borcs7  | 0,01  | 0,996998625 | -0,24 | 0,807197907 | -0,05 | 0,975866042 | 0,62  | 0,410999285 | -0,1  | 0,927536545 |
| Borcs8  | 0,01  | 0,991919022 | -0,12 | 0,849334395 | 0,08  | 0,943365715 | -0,16 | 0,723887166 | -0,64 | 0,265342858 |
| Borg    | -0,07 | 0,877707741 | 0,06  | 0,904346817 | -0,07 | 0,904057901 | 0,03  | 0,946369406 | 0,06  | 0,931191187 |
| Bpgm    | -0,71 | 0,232916935 | -0,35 | 0,792112243 | 0,4   | 0,671012215 | 0,35  | 0,648488024 | -0,34 | 0,757695841 |
| Bphl    | -0,29 | 0,771252343 | 0,08  | 0,88586665  | 0,66  | 0,483761569 | -0,87 | 0,243963114 | -0,9  | 0,159047845 |
| Bpi     | -0,09 | 0,927899995 | -0,32 | 0,642545139 | -0,39 | 0,526883623 | 0,43  | 0,161985142 | 0,06  | 0,962525821 |
| Bpifa1  | 0,45  | 0,279793863 | 0,16  | 0,716668427 | 0,04  | 0,9617386   | 0,07  | 0,893220936 | -0,02 | 0,984632256 |
| Bpifa2  | 0,07  | 0,944291635 | 0,38  | 0,694422914 | 0,05  | 0,946810097 | -0,19 | 0,764536401 | -0,31 | 0,712121015 |
| Bpifa3  | 0,04  | 0,937251448 | 0,26  | 0,631534856 | -0,14 | 0,878365741 | -0,05 | 0,935469638 | 0,02  | 0,980961333 |
| Bpifa5  | -0,14 | 0,858748956 | 0,43  | 0,304034247 | 0,02  | 0,983471086 | 0,12  | 0,78403004  | 0,49  | 0,600537288 |
| Bpifa6  | 0,25  | 0,570836179 | 0,41  | 0,715688609 | 0,07  | 0,919116989 | -0,03 | 0,970406067 | -0,06 | 0,954980387 |
| Bpifb1  | 0,43  | 0,525216441 | 0,17  | 0,857388191 | -0,32 | 0,648438146 | 0,14  | 0,830213552 | 0,03  | 0,978981442 |
| Bpifb2  | 0,04  | 0,967141984 | 0,03  | 0,984962061 | -0,46 | 0,433481425 | -0,06 | 0,962652083 | 0,16  | 0,909363599 |
| Bpifb3  | -0,1  | 0,902628825 | 0,13  | 0,916042399 | 0,02  | 0,991456043 | 0,03  | 0,947936692 | -0,14 | 0,860591136 |
| Bpifb4  | -0,2  | 0,813220024 | 0,07  | 0,949561659 | 0,26  | 0,717856288 | -0,21 | 0,733903742 | 0,02  | 0,985448733 |
| Bpifb5  | -0,11 | 0,883230961 | 0,06  | 0,91395667  | -0,34 | 0,680127367 | 0,26  | 0,501092949 | 0,14  | 0,843351909 |
| Bpifb6  | -0,2  | 0,828389885 | 0,1   | 0,851085879 | -0,12 | 0,889818596 | 0,26  | 0,709465672 | 0,25  | 0,85508146  |
| Bpifb9a | 0,13  | 0,81266486  | 0,25  | 0,556442436 | -0,26 | 0,791940256 | 0,17  | 0,700924597 | 0,2   | 0,840952901 |
| Bpifb9b | -0,21 | 0,827161869 | -0,02 | 0,995205602 | 0,11  | 0,934813979 | 0,22  | 0,709580416 | -0,13 | 0,887815327 |
| Bpifc   | 0,01  | 0,991027737 | 0,07  | 0,94892312  | -0,25 | 0,725673422 | 0,12  | 0,876439802 | 0,35  | 0,529853591 |
| Bpnt1   | -0,25 | 0,614250688 | -0,69 | 0,354604974 | 0,06  | 0,963357998 | 0,41  | 0,473764408 | -0,51 | 0,508751714 |
| Bptf    | -0,09 | 0,918758168 | 0,4   | 0,445693656 | 0,27  | 0,604499935 | -0,59 | 0,309401951 | 0,04  | 0,969617491 |
| Braf    | 0,06  | 0,899079341 | 0,13  | 0,82485467  | -0,15 | 0,85952125  | 0,21  | 0,733284121 | 0,11  | 0,900126162 |
| Brap    | -0,17 | 0,682102965 | -0,36 | 0,526101975 | 0,72  | 0,462643491 | -0,09 | 0,899335603 | -0,41 | 0,558284622 |
| Brat1   | -0,04 | 0,958535933 | -0,02 | 0,991023942 | 0,23  | 0,771789829 | -0,12 | 0,869234665 | -0,28 | 0,642726581 |
| Brca1   | -0,84 | 0,520948125 | -1    | 0,44688209  | 0,3   | 0,844191447 | 1,86  | 0,089266623 | -0,18 | 0,904040121 |
| Brca2   | -0,85 | 0,172300604 | -1,59 | 0,14467302  | 1,79  | 0,121033211 | 0,99  | 0,458415694 | -0,13 | 0,956823512 |
| Brcc3   | 0     | 0,999288019 | 0,73  | 0,173488446 | -0,55 | 0,374422909 | -0,68 | 0,186240088 | 0,67  | 0,25297993  |
| Brd1    | -0,32 | 0,574608525 | 0,08  | 0,93451524  | 0,38  | 0,469102587 | 0,4   | 0,497194901 | 0,18  | 0,840952901 |
| Brd2    | 0,43  | 0,227753128 | 0,31  | 0,463954617 | -0,36 | 0,500343254 | -0,43 | 0,190749766 | 0,29  | 0,554828063 |
| Brd3    | -0,59 | 0,422033372 | -0,19 | 0,80192513  | 0,28  | 0,715497532 | -0,11 | 0,907662772 | 0,04  | 0,976743304 |
| Brd4    | 0,04  | 0,946792769 | 0     | 1           | 0,35  | 0,446493846 | -0,12 | 0,839333217 | -0,36 | 0,560130813 |
| Brd7    | -0,33 | 0,54401985  | -0,21 | 0,655607331 | 0,45  | 0,28687759  | 0,08  | 0,87613802  | 0,11  | 0,883732171 |
| Brd8    | 0,02  | 0,979006273 | -0,19 | 0,666450149 | 0,3   | 0,732318987 | 0,35  | 0,576607546 | -0,06 | 0,956610289 |

|         |       |             |       |             |       |             |       |             |       |             |
|---------|-------|-------------|-------|-------------|-------|-------------|-------|-------------|-------|-------------|
| Brd9    | -0,43 | 0,614878886 | -0,27 | 0,539700767 | -0,25 | 0,77571553  | -0,5  | 0,205657692 | 0,02  | 0,984632256 |
| Brdt    | 0,37  | 0,513512947 | 0,04  | 0,972546149 | -0,21 | 0,814575035 | -0,08 | 0,92678264  | -0,17 | 0,866285506 |
| Bre     | -0,01 | 0,986829217 | -0,01 | 0,993789602 | -0,16 | 0,856605654 | 0,01  | 0,986544789 | 0,08  | 0,9162287   |
| Brf1    | 0,18  | 0,805837457 | -0,17 | 0,774204028 | -0,18 | 0,863181793 | 0,1   | 0,833841414 | -0,05 | 0,958856121 |
| Brf2    | -0,18 | 0,735971668 | -0,13 | 0,89474305  | 0,45  | 0,64743984  | 0,28  | 0,669653978 | 0,55  | 0,508708397 |
| Bri3    | 0,21  | 0,844548423 | 0,34  | 0,667757755 | 0,4   | 0,51912977  | 0,37  | 0,733598985 | 0,47  | 0,629683647 |
| Bri3bp  | -0,26 | 0,548019473 | -0,46 | 0,606495775 | 0,14  | 0,861307315 | 1,12  | 0,052298342 | -0,06 | 0,966630025 |
| Bricd5  | -0,46 | 0,363597602 | 0,49  | 0,559617305 | -0,24 | 0,844281668 | -0,31 | 0,758588473 | -0,16 | 0,815693459 |
| Brinp1  | 0,29  | 0,536798145 | -0,1  | 0,869822923 | -0,22 | 0,733423502 | -0,25 | 0,553572261 | -0,34 | 0,586214748 |
| Brinp2  | 0,09  | 0,926316023 | -0,14 | 0,855822577 | -0,14 | 0,841563482 | -0,09 | 0,828655456 | -0,11 | 0,876666201 |
| Brinp3  | 0,2   | 0,782709989 | 0,22  | 0,726534004 | -0,28 | 0,660567041 | 0,37  | 0,37252791  | 0,3   | 0,699402944 |
| Brip1   | -1,04 | 0,37816731  | -0,15 | 0,882847123 | 0,95  | 0,420043356 | 0,4   | 0,814810741 | 1,05  | 0,434347686 |
| Brip1os | -0,21 | 0,816527996 | -0,11 | 0,854940418 | 0,14  | 0,843091338 | 0,22  | 0,551681549 | -0,05 | 0,955776547 |
| Brix1   | -0,2  | 0,699193038 | -0,07 | 0,918694468 | 0,61  | 0,70365819  | 0,88  | 0,324755836 | 0,9   | 0,290347499 |
| Brk1    | -0,21 | 0,648730873 | 0,11  | 0,917256002 | 0,67  | 0,512312279 | 0,76  | 0,043091321 | 0,18  | 0,823098095 |
| Brms1   | 0,16  | 0,758636946 | -0,05 | 0,954823222 | 0,31  | 0,527929204 | -0,04 | 0,946205705 | 0,05  | 0,954694993 |
| Brms1l  | -0,17 | 0,9231839   | 0,17  | 0,824372931 | 0,32  | 0,74153462  | 0,28  | 0,721657141 | 0,13  | 0,888634933 |
| Brox    | 0,11  | 0,841714806 | -0,05 | 0,963369162 | -0,02 | 0,990836784 | -0,19 | 0,619079614 | -0,31 | 0,545166604 |
| Brpf1   | 0,02  | 0,985240551 | 0,22  | 0,709502365 | 0,28  | 0,640464842 | 0,28  | 0,510106322 | 0,12  | 0,855281866 |
| Brpf3   | -0,34 | 0,712552818 | 0,04  | 0,969314504 | 0,84  | 0,300988698 | -0,28 | 0,710917023 | -0,21 | 0,838679773 |
| Brs3    | 0,03  | 0,965380249 | 0,22  | 0,766425161 | 0,08  | 0,922318683 | 0,25  | 0,606522367 | 0,19  | 0,843199194 |
| Brsk1   | 0,11  | 0,914009222 | -0,28 | 0,622499716 | 0,16  | 0,758434325 | -0,75 | 0,071053431 | -0,61 | 0,253125485 |
| Brsk2   | -0,48 | 0,466960111 | 0     | 1           | -0,41 | 0,602775092 | -0,18 | 0,736730464 | -0,48 | 0,571269331 |
| Brwd1   | 0,16  | 0,882119027 | 0,15  | 0,800262513 | 0,3   | 0,760374956 | 0,27  | 0,559653635 | 0,01  | 0,992499729 |
| Brwd3   | 0,03  | 0,983516046 | 0,23  | 0,757266657 | 0,34  | 0,727262258 | 0,8   | 0,690659674 | 0,63  | 0,782610109 |
| Bscl2   | -0,1  | 0,882943798 | -0,14 | 0,912535732 | 0,36  | 0,685838081 | -0,33 | 0,685226398 | -0,48 | 0,507234235 |
| Bsdc1   | -0,06 | 0,908281692 | 0,29  | 0,626130765 | -0,05 | 0,939963707 | -0,51 | 0,304896332 | -0,46 | 0,403887774 |
| Bsg     | 0,52  | 0,213935959 | -0,11 | 0,824916914 | 0,07  | 0,95633676  | 0,4   | 0,244678297 | -0,27 | 0,610726014 |
| Bsn     | -0,04 | 0,962810563 | 0,37  | 0,62580345  | -0,31 | 0,725191296 | -0,09 | 0,907406741 | 0,15  | 0,893439982 |
| Bsnd    | 0,42  | 0,434641897 | -0,61 | 0,152199284 | 0,22  | 0,803209705 | 0,14  | 0,846857252 | 0,1   | 0,916510826 |
| Bsph1   | 0,17  | 0,693801088 | -0,02 | 0,985151214 | 0,11  | 0,850868333 | -0,19 | 0,661579252 | 0,05  | 0,956800412 |
| Bsph2   | 0,1   | 0,874838456 | -0,17 | 0,888963925 | 0,04  | 0,966647226 | -0,07 | 0,940708339 | -0,03 | 0,97206128  |
| Bspry   | -0,51 | 0,479545376 | 0,33  | 0,733785399 | -0,53 | 0,264621497 | -0,41 | 0,466105465 | 0,08  | 0,943463914 |
| Bst1    | 1,79  | 0,069444308 | 1,67  | 0,040620931 | -2,26 | 0,000890763 | 1,13  | 0,132323945 | 2,32  | 0,010363315 |
| Bst2    | 0,49  | 0,363239969 | 0,14  | 0,774278866 | -0,6  | 0,212877741 | 0,11  | 0,75629951  | 0,45  | 0,319597889 |

|          |       |             |       |             |       |             |       |             |       |             |
|----------|-------|-------------|-------|-------------|-------|-------------|-------|-------------|-------|-------------|
| Bsx      | -0,06 | 0,904019418 | -0,22 | 0,615058004 | -0,01 | 0,995635443 | -0,06 | 0,947551542 | -0,06 | 0,968226707 |
| Btaf1    | 0,35  | 0,611644482 | 0,38  | 0,424031137 | 0,04  | 0,975363558 | 0,25  | 0,786750698 | -0,02 | 0,990380783 |
| Btbd1    | 0,12  | 0,805603729 | -0,32 | 0,857388191 | 0,25  | 0,858001959 | -0,09 | 0,920710348 | 0,44  | 0,486708315 |
| Btbd10   | -0,35 | 0,739638841 | 0,18  | 0,900776574 | 0,38  | 0,749607234 | 0,12  | 0,837985327 | 0,03  | 0,97872616  |
| Btbd11   | -0,3  | 0,605524692 | -0,1  | 0,923044405 | 0,38  | 0,628427952 | -0,39 | 0,559278753 | -0,49 | 0,471406593 |
| Btbd16   | -0,3  | 0,576406658 | -0,19 | 0,786394409 | -0,07 | 0,929395646 | 0,25  | 0,450450069 | -0,26 | 0,673159487 |
| Btbd17   | 0,81  | 0,203168309 | 0,3   | 0,637712719 | -0,22 | 0,808747196 | -0,05 | 0,939275881 | 0,36  | 0,551380136 |
| Btbd18   | 0,14  | 0,803761785 | -0,24 | 0,752038109 | -0,16 | 0,829543101 | 0,06  | 0,9274274   | 0,28  | 0,600622169 |
| Btbd19   | -0,05 | 0,959392819 | 0,19  | 0,905963572 | 0,15  | 0,905967183 | -0,28 | 0,535573932 | -0,35 | 0,616797608 |
| Btbd2    | -0,01 | 0,991516118 | -0,02 | 0,974580396 | 0,51  | 0,467503988 | -0,47 | 0,248595843 | -0,35 | 0,518216192 |
| Btbd3    | -0,04 | 0,973255755 | 0,79  | 0,19625137  | 0,34  | 0,760930184 | 1,2   | 0,299499224 | -0,11 | 0,952659646 |
| Btbd6    | -0,31 | 0,638456995 | -0,13 | 0,818072947 | 0,19  | 0,785190083 | 0,01  | 0,984966598 | -0,14 | 0,845218636 |
| Btbd7    | -0,19 | 0,760872819 | 0,41  | 0,457814259 | -0,24 | 0,617592492 | -0,67 | 0,118283887 | 0,05  | 0,952190189 |
| Btbd8    | -0,35 | 0,59130483  | 0,21  | 0,700297886 | 0,17  | 0,791940256 | -0,52 | 0,402472168 | -0,49 | 0,681597394 |
| Btbd9    | 0,32  | 0,567957149 | 0,17  | 0,783862212 | -0,4  | 0,517379736 | 0,64  | 0,087391739 | 0,62  | 0,328547214 |
| Btc      | -0,29 | 0,601533006 | 0,23  | 0,664787536 | 0,58  | 0,595395621 | 0,39  | 0,235275284 | 0,31  | 0,559845734 |
| Btd      | -0,15 | 0,848783415 | 0,1   | 0,894167102 | 0,95  | 0,209005345 | -0,11 | 0,903739255 | -0,2  | 0,859686493 |
| Btf3     | 0,02  | 0,98456417  | -0,45 | 0,666450149 | 0,25  | 0,783326867 | 0,59  | 0,395313129 | -0,62 | 0,445260584 |
| Btf3l4   | -0,47 | 0,561405935 | 0,12  | 0,895950162 | 0,54  | 0,340237423 | -0,57 | 0,635726217 | -0,24 | 0,86570087  |
| Btg1     | 0,37  | 0,373794253 | 0,1   | 0,816723225 | -0,7  | 0,302861841 | -0,16 | 0,829087694 | 0,17  | 0,843351909 |
| Btg1-ps1 | -0,44 | 0,397054492 | 0,2   | 0,855894037 | -0,54 | 0,260479447 | -0,23 | 0,646583871 | -0,16 | 0,894771226 |
| Btg1-ps2 | -0,39 | 0,483395607 | -0,02 | 0,979406438 | -0,39 | 0,446135567 | 0,05  | 0,969016842 | 0,24  | 0,797167184 |
| Btg2     | -0,46 | 0,260634235 | 0,14  | 0,791442364 | -0,24 | 0,715403033 | -0,86 | 0,044112346 | 0     | 0,9969305   |
| Btg3     | -0,01 | 0,995904992 | 0,21  | 0,841007084 | -0,41 | 0,444372412 | -0,49 | 0,564245683 | -0,12 | 0,877021938 |
| Btg4     | 0,06  | 0,926007268 | -0,08 | 0,919119519 | 0,06  | 0,953917674 | -0,07 | 0,95852873  | -0,12 | 0,907634098 |
| Btk      | -0,05 | 0,972164346 | 0,2   | 0,864680059 | 0,14  | 0,86462271  | 0,32  | 0,726609135 | 0,74  | 0,501729646 |
| Btla     | -0,04 | 0,940822026 | 0,5   | 0,664787536 | -0,09 | 0,943170329 | -0,64 | 0,476999373 | 0,33  | 0,732769706 |
| Btn1a1   | 0,51  | 0,570883508 | -0,12 | 0,820137069 | -0,04 | 0,964509282 | 0,01  | 0,987316384 | -0,06 | 0,959573673 |
| Btn2a2   | 0,22  | 0,743548475 | -0,16 | 0,893952182 | -0,35 | 0,450605545 | 0,24  | 0,657589788 | 0,03  | 0,979392852 |
| Btnl1    | 0,17  | 0,844880277 | 0,1   | 0,893035824 | 0,05  | 0,957152002 | -0,37 | 0,32544186  | -0,5  | 0,328821044 |
| Btnl10   | 0,04  | 0,960720096 | -0,27 | 0,703291096 | 0,1   | 0,881461218 | 0,43  | 0,415968391 | 0,21  | 0,866598006 |
| Btnl2    | 0,26  | 0,720914253 | 0,64  | 0,260289589 | -0,29 | 0,712697139 | 0,2   | 0,792371216 | 0,01  | 0,991628025 |
| Btnl5-ps | -0,99 | 0,174631079 | 0,29  | 0,767178812 | -0,3  | 0,574149818 | -0,04 | 0,963343418 | 0,16  | 0,88288747  |
| Btnl9    | -0,63 | 0,460231397 | -1,39 | 0,094438943 | 0,46  | 0,532416491 | -0,87 | 0,055958675 | -1,97 | 0,002557385 |
| Btrc     | -0,2  | 0,766705553 | 0,24  | 0,593777931 | 0,46  | 0,435916963 | -0,85 | 0,137777394 | -0,3  | 0,765340194 |

|               |       |             |       |             |       |             |       |             |       |             |
|---------------|-------|-------------|-------|-------------|-------|-------------|-------|-------------|-------|-------------|
| Bub1          | -1,44 | 0,189684245 | -2,99 | 0,10752682  | 1,27  | 0,103030088 | 3,36  | 0,039645631 | -0,05 | 0,973609004 |
| Bub1b         | -1,24 | 0,077161113 | -1,83 | 0,152199284 | 1,41  | 0,012752998 | 2,68  | 0,009959417 | -0,03 | 0,97872616  |
| Bub3          | -0,39 | 0,423395139 | -0,25 | 0,667316705 | 0,52  | 0,419537272 | 0,44  | 0,690664654 | 0,01  | 0,997044214 |
| Bud13         | -0,52 | 0,65761852  | -0,23 | 0,664787536 | -0,24 | 0,819410193 | 0,39  | 0,697953188 | 0,16  | 0,912250982 |
| Bud31         | 0,3   | 0,532619839 | -0,09 | 0,868538818 | 0,17  | 0,775964228 | 0,43  | 0,264097924 | 0,15  | 0,823776279 |
| Bves          | -0,17 | 0,909325137 | 0,21  | 0,801259805 | 0,12  | 0,898935616 | -0,02 | 0,97581815  | 0,28  | 0,628999683 |
| Bvht          | -0,27 | 0,501334077 | -0,47 | 0,551515746 | 0,05  | 0,953917674 | -0,66 | 0,113087943 | -0,52 | 0,268016026 |
| Bysl          | -0,78 | 0,26418498  | -0,01 | 0,999395995 | 0,17  | 0,913333366 | 0,66  | 0,097755932 | 0,08  | 0,961879805 |
| Bzrap1        | -0,04 | 0,960597621 | -0,07 | 0,902294619 | -0,09 | 0,873457545 | 0,31  | 0,339455217 | 0,02  | 0,983469081 |
| Bzw1          | -0,09 | 0,832696131 | -0,04 | 0,954948291 | 0,09  | 0,913378619 | 0,7   | 0,184757317 | 0,38  | 0,567306543 |
| Bzw2          | -0,41 | 0,423859346 | -0,21 | 0,76677473  | 1,15  | 0,064246958 | 2,1   | 0,124610859 | 0,4   | 0,807620467 |
| C030005K06Rik | -0,21 | 0,764288636 | -0,33 | 0,789363581 | -0,08 | 0,923258105 | 0,26  | 0,643029225 | 0,2   | 0,788611988 |
| C030005K15Rik | 0,04  | 0,958512892 | -0,03 | 0,947986685 | -0,04 | 0,956851735 | 0,01  | 0,984351412 | 0,08  | 0,923951087 |
| C030006K11Rik | -0,12 | 0,902504843 | -0,07 | 0,946599376 | 0,29  | 0,827945197 | -0,47 | 0,322699984 | -0,29 | 0,592053999 |
| C030007H22Rik | -0,05 | 0,956095057 | -0,12 | 0,886728509 | 0,25  | 0,757498725 | -0,35 | 0,45869835  | -0,23 | 0,811183541 |
| C030010L15Rik | 0,35  | 0,436086286 | 0,1   | 0,834836889 | 0,05  | 0,942150325 | -0,08 | 0,832265679 | -0,17 | 0,766162221 |
| C030013C21Rik | 0,86  | 0,235085039 | 0,69  | 0,565640559 | 0     | 0,999931921 | -0,09 | 0,947809027 | 0,89  | 0,366079495 |
| C030013D06Rik | 0,26  | 0,683531628 | -0,35 | 0,622499716 | 0,05  | 0,964792312 | -0,62 | 0,115795315 | -0,15 | 0,845218636 |
| C030013G03Rik | -0,01 | 0,986380203 | 0,03  | 0,965878839 | 0,02  | 0,973641476 | 0,13  | 0,764489444 | 0,23  | 0,718869886 |
| C030014I23Rik | -0,05 | 0,937935576 | -0,04 | 0,94572783  | -0,01 | 0,990836784 | -0,29 | 0,501068696 | -0,2  | 0,765809384 |
| C030016D13Rik | 0,17  | 0,726734184 | -0,03 | 0,952293161 | -0,07 | 0,931288933 | -0,18 | 0,744192679 | 0,49  | 0,512907543 |
| C030017D09Rik | 0,01  | 0,986639953 | -0,15 | 0,774850673 | -0,05 | 0,941437449 | 0,02  | 0,959958662 | 0,11  | 0,883592868 |
| C030018K13Rik | 0,19  | 0,707502054 | 0,36  | 0,654621987 | -0,16 | 0,807926482 | -0,23 | 0,539777286 | 0,01  | 0,994270272 |
| C030023E24Rik | 0,1   | 0,813220024 | 0,13  | 0,765325717 | 0     | 0,999931921 | -0,04 | 0,932489351 | -0,03 | 0,97425848  |
| C030029H02Rik | 0,05  | 0,949101284 | 0,06  | 0,927029684 | -0,12 | 0,860094776 | -0,03 | 0,965524724 | -0,06 | 0,950267521 |
| C030034I22Rik | 0,08  | 0,94815841  | -0,08 | 0,911036659 | -0,45 | 0,641439342 | 0     | 0,999997968 | 0     | 0,999595686 |
| C030034L19Rik | 0,2   | 0,818611891 | 0,16  | 0,723339619 | -0,63 | 0,430424599 | 0,15  | 0,807985473 | -0,1  | 0,940878193 |
| C030037D09Rik | 0,14  | 0,903817676 | 0,2   | 0,905189352 | -0,39 | 0,620538077 | -1,05 | 0,152725073 | -0,29 | 0,765256761 |
| C030037F17Rik | -0,1  | 0,830717662 | 0,24  | 0,810418074 | 0,22  | 0,757740418 | -0,02 | 0,97666971  | 0,15  | 0,828679046 |
| C030039L03Rik | -0,07 | 0,946472896 | 0,18  | 0,786405071 | -0,29 | 0,695705149 | -0,07 | 0,95296745  | 0,18  | 0,868117988 |
| C030047K22Rik | 0,12  | 0,869565514 | -0,23 | 0,855632384 | -0,04 | 0,963214977 | 0,45  | 0,185838203 | 0,6   | 0,274394155 |
| C130021I20Rik | 0,16  | 0,833275012 | -0,56 | 0,242002134 | -0,22 | 0,770581496 | 0,59  | 0,206291305 | 0,47  | 0,413879396 |
| C130023O10Rik | 0     | 1           | -0,06 | 0,910184435 | -0,08 | 0,932866273 | 0,03  | 0,946205705 | 0,02  | 0,984125319 |
| C130026L21Rik | -0,15 | 0,792328154 | 0,05  | 0,972706967 | -0,09 | 0,948637233 | -0,01 | 0,985580087 | -0,01 | 0,992370267 |
| C130030K03Rik | 0,52  | 0,38389262  | 0     | 1           | -0,05 | 0,949274534 | -0,05 | 0,951235707 | 0,07  | 0,936204843 |



|               |       |             |       |             |       |             |       |             |       |             |
|---------------|-------|-------------|-------|-------------|-------|-------------|-------|-------------|-------|-------------|
| C130036L24Rik | -0,14 | 0,874676538 | -0,33 | 0,609580302 | -0,36 | 0,747950844 | 0,7   | 0,110890014 | -0,15 | 0,816305974 |
| C130040N14Rik | -0,1  | 0,862160773 | 0,12  | 0,857503073 | -0,06 | 0,953856731 | -0,09 | 0,935326628 | 0     | 0,99888749  |
| C130046K22Rik | 0,29  | 0,505856084 | -0,07 | 0,887752277 | -0,18 | 0,71593256  | -1,2  | 0,092516401 | -0,64 | 0,324447163 |
| C130050O18Rik | 0,14  | 0,778817886 | -0,14 | 0,810146573 | -0,04 | 0,955119997 | -0,41 | 0,436661219 | -0,34 | 0,699060093 |
| C130060C02Rik | -0,36 | 0,430173798 | -0,16 | 0,819120994 | -0,22 | 0,787264391 | 0,01  | 0,996769706 | -0,4  | 0,615859063 |
| C130060K24Rik | -0,08 | 0,959458865 | -0,09 | 0,926157704 | -0,04 | 0,97041109  | -0,01 | 0,988205241 | 0,29  | 0,704903041 |
| C130071C03Rik | 0,21  | 0,689767004 | 0,25  | 0,589281517 | -0,22 | 0,793435658 | -0,08 | 0,887045509 | 0,34  | 0,623852053 |
| C130073F10Rik | 0,4   | 0,552331623 | 0,42  | 0,496400123 | -0,18 | 0,787216636 | -0,73 | 0,272379663 | 0,01  | 0,990448047 |
| C130074G19Rik | -0,57 | 0,272587269 | -0,36 | 0,493391321 | 0,37  | 0,602775092 | -0,12 | 0,83280418  | -0,05 | 0,955910202 |
| C130079G13Rik | -0,13 | 0,864526424 | -0,25 | 0,572265683 | 0,08  | 0,909728993 | 0,31  | 0,397216038 | 0,02  | 0,980961333 |
| C130080G10Rik | -0,18 | 0,897717279 | -0,16 | 0,804576975 | 0,03  | 0,985326269 | 0,81  | 0,290774064 | 0,23  | 0,806478588 |
| C130083M11Rik | 0,02  | 0,98225675  | 0,05  | 0,9714703   | -0,15 | 0,835250977 | -0,08 | 0,912193677 | -0,14 | 0,880404482 |
| C1d           | 0,37  | 0,42677652  | 0,1   | 0,856600114 | 0,46  | 0,349038781 | 0,14  | 0,716805615 | 0,19  | 0,806478588 |
| C1galt1       | -0,6  | 0,2687193   | -0,4  | 0,653323136 | 1,62  | 0,124912754 | 1,15  | 0,29766037  | 0,4   | 0,763240477 |
| C1galt1c1     | 0,11  | 0,807612551 | 0,09  | 0,874448335 | 0,01  | 0,991240121 | -0,06 | 0,885417869 | 0,32  | 0,584694999 |
| C1qa          | 0,36  | 0,341657259 | -0,19 | 0,702991386 | -0,12 | 0,906301115 | 0,89  | 0,099090657 | 0,19  | 0,836061657 |
| C1qb          | 0     | 0,999652707 | -0,29 | 0,680709276 | 0,32  | 0,66424919  | 0,73  | 0,175189563 | -0,23 | 0,765809384 |
| C1qbp         | -0,27 | 0,820785667 | -0,48 | 0,468827889 | 0,91  | 0,26430961  | 0,79  | 0,099321276 | 0,03  | 0,975441362 |
| C1qc          | 0,19  | 0,770640793 | 0,25  | 0,582976316 | 0,15  | 0,804910036 | -0,02 | 0,990388217 | -0,13 | 0,920355527 |
| C1ql1         | -0,07 | 0,897717279 | -0,09 | 0,858860016 | -0,48 | 0,598179126 | -0,08 | 0,912706869 | -0,31 | 0,734445655 |
| C1ql2         | 0,26  | 0,65875307  | -0,43 | 0,49125334  | -0,27 | 0,589007939 | -0,01 | 0,994638711 | 0,02  | 0,982175252 |
| C1ql3         | -0,13 | 0,905410659 | 0,18  | 0,708022183 | -0,22 | 0,816883729 | 0,25  | 0,545036178 | -0,03 | 0,983613958 |
| C1ql4         | -0,41 | 0,511005771 | -0,19 | 0,790939978 | -0,85 | 0,045360114 | 0,04  | 0,921063977 | -0,04 | 0,975441362 |
| C1qtnf1       | -0,49 | 0,419591944 | -0,45 | 0,483436169 | -0,14 | 0,938771378 | 1,39  | 0,009073953 | -0,48 | 0,335365079 |
| C1qtnf2       | 0     | 0,998584113 | 0,21  | 0,912773944 | 0     | 0,997581017 | -1,73 | 0,17421446  | -0,91 | 0,334365666 |
| C1qtnf3       | 0,22  | 0,840515514 | -0,21 | 0,829391238 | -0,07 | 0,934354994 | -0,51 | 0,310183343 | -0,32 | 0,6754671   |
| C1qtnf4       | 0,18  | 0,703606438 | 0,05  | 0,969019461 | -0,27 | 0,6021281   | 0,06  | 0,873812847 | -0,08 | 0,916297433 |
| C1qtnf6       | -0,65 | 0,35419917  | -0,44 | 0,6106804   | -0,09 | 0,953456022 | 1,36  | 0,053218753 | -0,39 | 0,664771836 |
| C1qtnf7       | -0,05 | 0,949362206 | 0,11  | 0,893005076 | -0,12 | 0,905393221 | -2,44 | 0,029669157 | -1,08 | 0,220159635 |
| C1qtnf9       | -0,27 | 0,678433901 | 0,14  | 0,732044571 | 0,09  | 0,935446084 | 0,5   | 0,263608051 | 0,37  | 0,526122398 |
| C1rb          | 0,01  | 0,995850917 | -0,61 | 0,753292938 | -0,11 | 0,909233941 | -0,13 | 0,790298453 | 0,03  | 0,975441362 |
| C1rl          | 0,36  | 0,545805455 | 0,11  | 0,807175471 | -0,57 | 0,26430961  | -0,25 | 0,739388845 | -0,03 | 0,984632256 |
| C1s2          | 0,67  | 0,554731565 | 0,74  | 0,39525858  | -0,02 | 0,985675844 | -0,17 | 0,786906799 | -0,23 | 0,763240477 |
| C2            | 3,68  | 0,018738684 | 3,82  | 0,008008239 | -2,47 | 0,001356557 | 1,22  | 0,017698482 | 3,3   | 0,001769815 |
| C230004F18Rik | 0,2   | 0,778817886 | 0,22  | 0,733708652 | -0,18 | 0,706714392 | 0,11  | 0,823045201 | 0,15  | 0,823098095 |

|               |       |             |       |             |       |             |       |             |       |             |
|---------------|-------|-------------|-------|-------------|-------|-------------|-------|-------------|-------|-------------|
| C230012O17Rik | 0,13  | 0,777335496 | 0,27  | 0,742043497 | -0,36 | 0,568205473 | 0,19  | 0,596557578 | -0,03 | 0,972302312 |
| C230013L11Rik | 0,09  | 0,877096932 | -0,11 | 0,800067055 | 0,12  | 0,872180056 | 0,14  | 0,784077644 | -0,34 | 0,714308672 |
| C230014O12Rik | 0,44  | 0,520609641 | 0,09  | 0,926157704 | 0,13  | 0,84847388  | 0,56  | 0,390823877 | 0,17  | 0,859412704 |
| C230021G24Rik | -0,25 | 0,5837369   | 0,01  | 0,992175086 | -0,04 | 0,963221639 | -0,06 | 0,912985122 | -0,35 | 0,524829864 |
| C230024C17Rik | -0,1  | 0,856887426 | -0,43 | 0,271145766 | 0,19  | 0,823823322 | 0,18  | 0,75983637  | 0,13  | 0,866285506 |
| C230029F24Rik | 0,66  | 0,250472061 | 0,14  | 0,917139029 | -0,4  | 0,698662367 | 0,05  | 0,931477012 | -0,34 | 0,601753447 |
| C230030N03Rik | -0,17 | 0,9231839   | 0,62  | 0,583200444 | 0,68  | 0,440550754 | -0,79 | 0,422943572 | -0,29 | 0,738260196 |
| C230035I16Rik | 0,22  | 0,761457464 | 0,15  | 0,893592517 | -0,22 | 0,817780561 | -0,05 | 0,968211182 | -0,03 | 0,983514531 |
| C230037L18Rik | 0,05  | 0,969486005 | 0,59  | 0,48761393  | -0,81 | 0,354246016 | -0,76 | 0,04745196  | 0,27  | 0,6425144   |
| C230057M02Rik | -0,25 | 0,82256632  | 0,15  | 0,847885195 | 0,12  | 0,876005604 | -0,05 | 0,9274274   | 0,08  | 0,947437555 |
| C230062I16Rik | -0,16 | 0,832696131 | -0,58 | 0,627205829 | -0,01 | 0,993379272 | 0,64  | 0,464215931 | -0,06 | 0,973576804 |
| C230072F16Rik | -0,23 | 0,853351904 | -0,06 | 0,956049982 | 0,17  | 0,86459621  | 0,01  | 0,997766493 | -0,24 | 0,682134021 |
| C230073G13Rik | 0,29  | 0,783200207 | -0,65 | 0,418279074 | -0,37 | 0,61483831  | 1,35  | 0,528813844 | -0,11 | 0,975986697 |
| C230079O03Rik | 0,25  | 0,546019769 | 0,19  | 0,855607772 | -0,1  | 0,917355383 | -0,36 | 0,27328094  | -0,37 | 0,469148703 |
| C230091D08Rik | -0,02 | 0,98120593  | 0,05  | 0,946885634 | -0,14 | 0,80874731  | 0,13  | 0,76520917  | 0,04  | 0,965798481 |
| C230098j07rik | -0,22 | 0,663318436 | 0,17  | 0,897645724 | 0,2   | 0,820892001 | 0,01  | 0,981610833 | 0,1   | 0,891925115 |
| C2cd2         | -0,3  | 0,443047489 | -0,44 | 0,731912687 | 0,25  | 0,825174342 | -0,94 | 0,044758603 | -0,32 | 0,710368081 |
| C2cd2l        | -0,34 | 0,488619512 | -0,34 | 0,590722193 | -0,07 | 0,929871006 | -0,39 | 0,283608652 | -0,12 | 0,872242794 |
| C2cd3         | -0,29 | 0,602197374 | -0,09 | 0,920386453 | 0,62  | 0,533790057 | -0,28 | 0,394167729 | -0,07 | 0,935708361 |
| C2cd4a        | 0     | 0,998584113 | -0,03 | 0,98845779  | 0,17  | 0,870263371 | -0,22 | 0,671576377 | -0,53 | 0,464042598 |
| C2cd4b        | -0,09 | 0,877610332 | 0,13  | 0,861905894 | 0,01  | 0,991568687 | 0,15  | 0,696004652 | 0,2   | 0,74933755  |
| C2cd4c        | -0,23 | 0,673291416 | 0,06  | 0,954307545 | 0     | 0,9985941   | -0,07 | 0,908141892 | -0,23 | 0,799490171 |
| C2cd4d        | -0,01 | 0,990162934 | 0,01  | 0,998237793 | -0,01 | 0,993379272 | 0,19  | 0,726852263 | 0,01  | 0,991628025 |
| C2cd5         | -0,14 | 0,773475811 | 0,51  | 0,471225184 | 0,62  | 0,292927353 | -1    | 0,078988145 | 0,38  | 0,462513936 |
| C3            | -0,41 | 0,781671022 | 0,38  | 0,689645531 | 0,65  | 0,599364835 | -1,17 | 0,11053945  | -0,32 | 0,730289864 |
| C330002G04Rik | 0,49  | 0,519823113 | -0,19 | 0,869831712 | -0,33 | 0,585645978 | 0,17  | 0,744405911 | 0     | 0,996085757 |
| C330006A16Rik | -0,65 | 0,178589155 | -0,28 | 0,828219939 | 0,34  | 0,542758274 | -0,22 | 0,796985281 | -0,36 | 0,763240477 |
| C330007P06Rik | 0     | 0,997842309 | 0,04  | 0,9554581   | 0,25  | 0,825782434 | -0,32 | 0,549053352 | 0,08  | 0,947300798 |
| C330011F03Rik | 0,42  | 0,538001428 | -0,18 | 0,640299669 | -0,04 | 0,96043738  | 0,17  | 0,715821479 | 0,06  | 0,940092696 |
| C330011M18Rik | -0,3  | 0,706900702 | -0,12 | 0,882847123 | -0,28 | 0,647928093 | 0,02  | 0,982985345 | -0,13 | 0,903832364 |
| C330013E15Rik | 0,06  | 0,897583596 | 0,13  | 0,804576975 | 0,09  | 0,891500876 | 0,05  | 0,943143586 | 0,18  | 0,800360265 |
| C330018A13Rik | 0,06  | 0,906459256 | -0,1  | 0,859816636 | 0,02  | 0,984407511 | -0,11 | 0,751801424 | 0,18  | 0,765340194 |
| C330018D20Rik | -0,35 | 0,597519827 | 1,28  | 0,187729631 | -0,46 | 0,746397133 | -1,4  | 0,092198119 | 0,51  | 0,54877753  |
| C330019F10Rik | 0,11  | 0,902994032 | -0,16 | 0,683509429 | -0,24 | 0,775492921 | -0,08 | 0,92678264  | 0,11  | 0,935493196 |
| C330021F23Rik | 0,07  | 0,94727537  | 0,17  | 0,855632384 | 0,09  | 0,910455531 | 0,1   | 0,885417869 | 0,15  | 0,872998211 |

|               |       |             |       |             |       |             |       |             |       |             |
|---------------|-------|-------------|-------|-------------|-------|-------------|-------|-------------|-------|-------------|
| C330022C24Rik | 0,03  | 0,971724975 | 0,28  | 0,702406882 | 0,26  | 0,616398569 | -0,24 | 0,480982028 | -0,1  | 0,881968395 |
| C330024C12Rik | 0,3   | 0,595466702 | -0,22 | 0,72545882  | -0,32 | 0,513446928 | -0,06 | 0,924569336 | -0,16 | 0,783490449 |
| C330024D21Rik | 0,19  | 0,848780666 | 0,59  | 0,656320481 | -0,02 | 0,984778342 | -0,02 | 0,971539135 | 0,38  | 0,459584226 |
| C330027C09Rik | -1,62 | 0,16527332  | -2,34 | 0,159848438 | 0,88  | 0,603407852 | 2,93  | 0,017667572 | -0,15 | 0,887815327 |
| C3ar1         | -0,26 | 0,701086418 | 0,13  | 0,837480636 | -0,18 | 0,846975965 | 0,11  | 0,810508503 | -0,01 | 0,992022739 |
| C430002N11Rik | -0,08 | 0,899550586 | -0,16 | 0,906201358 | -0,47 | 0,432776468 | -0,11 | 0,852596465 | 0,06  | 0,952811332 |
| C430014B12Rik | 0,05  | 0,932354771 | -0,04 | 0,944864292 | 0,22  | 0,749254864 | 0,62  | 0,325178213 | -0,23 | 0,825518917 |
| C430039J16Rik | 0,08  | 0,922118639 | 0,09  | 0,882589938 | -0,25 | 0,620837479 | 0,04  | 0,940771365 | 0,43  | 0,38913846  |
| C430042M11Rik | 0,18  | 0,772855197 | 0,06  | 0,930849936 | 0,23  | 0,628978443 | 0,57  | 0,128566603 | 0,33  | 0,488058712 |
| C430049B03Rik | -0,54 | 0,378598836 | -0,18 | 0,680709276 | -0,32 | 0,856605654 | 0,04  | 0,97666971  | 0,19  | 0,913274952 |
| C4a           | -0,64 | 0,576406658 | -0,08 | 0,920204975 | 0,04  | 0,982305856 | -0,43 | 0,469017496 | 0,3   | 0,723103887 |
| C4b           | 0,51  | 0,419591944 | 0,03  | 0,98459889  | -0,57 | 0,62535327  | -0,32 | 0,391227301 | 1     | 0,068668324 |
| C4bp          | 0,61  | 0,412607475 | -0,53 | 0,538642201 | 0,01  | 0,990836784 | 0,32  | 0,768880868 | 0,17  | 0,909024113 |
| C4bp-ps1      | -0,06 | 0,911800803 | -0,13 | 0,949830192 | -0,09 | 0,926974012 | 0,19  | 0,784479261 | 0,17  | 0,859663155 |
| C530005A16Rik | 0,24  | 0,751774469 | 0,17  | 0,786190103 | 0,47  | 0,742605945 | -0,81 | 0,221934349 | -0,77 | 0,218199508 |
| C530008M17Rik | -0,27 | 0,652819827 | 0,04  | 0,984812702 | 0,02  | 0,990836784 | 0,03  | 0,977864608 | -0,43 | 0,459584226 |
| C530025M09Rik | -0,24 | 0,602160482 | -0,02 | 0,9777932   | -0,2  | 0,722149463 | -0,06 | 0,902828239 | -0,02 | 0,985269236 |
| C530030P08Rik | 0,41  | 0,61300824  | 0,12  | 0,804166367 | 1,26  | 0,22657669  | 0,57  | 0,541971276 | 0,57  | 0,685602077 |
| C530044C16Rik | 0,07  | 0,946792769 | -0,04 | 0,966717367 | 0,43  | 0,503650142 | 0,41  | 0,378056559 | 0,29  | 0,632781943 |
| C530047H08Rik | 0,5   | 0,202613112 | -0,24 | 0,673542391 | 0,04  | 0,961464515 | -0,02 | 0,967205035 | -0,27 | 0,741766428 |
| C530050E15Rik | 0,04  | 0,94815841  | 0,12  | 0,781046971 | -0,06 | 0,926566777 | -0,51 | 0,249096321 | -0,42 | 0,435713401 |
| C5ar1         | 0,02  | 0,984759626 | -0,07 | 0,916730432 | 0,18  | 0,837098462 | 0,22  | 0,694343512 | -0,18 | 0,859050817 |
| C5ar2         | 0,09  | 0,934675994 | -0,02 | 0,989873399 | 0,04  | 0,987094761 | -0,36 | 0,371647848 | -0,03 | 0,980961333 |
| C6            | -0,31 | 0,522853411 | -0,09 | 0,893512326 | -0,57 | 0,27278296  | 0,17  | 0,852055663 | 0,3   | 0,765340194 |
| C630004L07Rik | 0,16  | 0,829299665 | -0,03 | 0,967932183 | -0,17 | 0,823823322 | 0,16  | 0,652134405 | 0,26  | 0,708898543 |
| C630028M04Rik | -0,22 | 0,666297306 | 0,1   | 0,873872616 | -0,09 | 0,916749895 | 0,24  | 0,739831108 | -0,23 | 0,708592278 |
| C630031E19Rik | 0,02  | 0,97159365  | 0,14  | 0,811472247 | -0,32 | 0,505038995 | -0,01 | 0,983918723 | 0,06  | 0,954657649 |
| C630043F03Rik | -0,26 | 0,648730873 | 0,38  | 0,519837094 | 0,34  | 0,750624323 | -0,6  | 0,162687892 | 0,48  | 0,296737231 |
| C630050I24Rik | 0,29  | 0,662416763 | -0,03 | 0,978879174 | -0,17 | 0,845321518 | 0,24  | 0,769518226 | 0,09  | 0,969617491 |
| C7            | 0,15  | 0,839375532 | -0,13 | 0,839789639 | -0,13 | 0,83442082  | 0,24  | 0,658866873 | 0,01  | 0,991628025 |
| C730002L08Rik | 0,13  | 0,856094086 | 0,01  | 0,993577607 | -0,11 | 0,875486206 | 0,42  | 0,40199632  | 0,26  | 0,725669526 |
| C730014E05Rik | 0,04  | 0,950532575 | 0,02  | 0,981411052 | 0,09  | 0,926633738 | -0,68 | 0,471405206 | -0,4  | 0,668008337 |
| C730027H18Rik | -0,04 | 0,956484595 | -0,19 | 0,855974935 | 0,16  | 0,82104737  | -0,41 | 0,468562522 | -0,57 | 0,280324145 |
| C730034F03Rik | -0,47 | 0,42935185  | -0,19 | 0,639618506 | 0,22  | 0,750624323 | -0,47 | 0,167163782 | -0,44 | 0,41929965  |
| C730036E19Rik | -0,34 | 0,526089634 | 0,03  | 0,988550087 | -0,02 | 0,984407511 | -0,06 | 0,909697685 | 0,34  | 0,48837696  |

|               |       |             |       |             |       |             |       |             |       |             |
|---------------|-------|-------------|-------|-------------|-------|-------------|-------|-------------|-------|-------------|
| C77080        | 0,12  | 0,84900712  | 0,08  | 0,945375109 | 0,26  | 0,785866476 | 0,91  | 0,080032206 | -0,01 | 0,993116602 |
| C77370        | 0,03  | 0,976558607 | 0,22  | 0,903595287 | -0,18 | 0,817106175 | -0,53 | 0,535672313 | -0,33 | 0,760401775 |
| C78197        | 0,29  | 0,50667946  | 0,1   | 0,941628939 | -0,11 | 0,885042765 | 0,43  | 0,390843975 | 0,02  | 0,987603478 |
| C78653        | 0,12  | 0,825229678 | 0     | 1           | -0,33 | 0,502718751 | -0,01 | 0,996363405 | 0,15  | 0,887719506 |
| C79798        | 0,13  | 0,824639882 | -0,02 | 0,987282412 | 0,06  | 0,935945983 | 0,01  | 0,981631718 | -0,04 | 0,969994712 |
| C820005J03Rik | 0,08  | 0,88090997  | 0,07  | 0,905229684 | -0,22 | 0,736837174 | -0,1  | 0,835708275 | 0,13  | 0,861236592 |
| C86187        | -0,09 | 0,872280465 | 0,13  | 0,832020509 | -0,16 | 0,848485609 | -0,07 | 0,876658566 | 0,14  | 0,868602248 |
| C87198        | -0,28 | 0,764189777 | -0,01 | 0,997935558 | -0,27 | 0,676418104 | 0,11  | 0,805169421 | 0,37  | 0,505456212 |
| C87414        | 1,22  | 0,154960518 | 0,57  | 0,595287483 | 0,19  | 0,903942509 | -0,7  | 0,499384622 | -0,48 | 0,688557987 |
| C87436        | 0,25  | 0,720783705 | 0,07  | 0,969010894 | -0,36 | 0,745291191 | -1,43 | 0,09733564  | -0,41 | 0,412253278 |
| C87499        | 0,45  | 0,511972838 | -0,36 | 0,691433995 | -0,4  | 0,527929204 | 0,46  | 0,555650162 | 0,01  | 0,992499729 |
| C8a           | 0,37  | 0,391383296 | 0,37  | 0,3679706   | 0,21  | 0,791940256 | -0,08 | 0,89461226  | 0,1   | 0,948759136 |
| C8b           | -0,21 | 0,679099276 | -0,05 | 0,964419013 | 0,13  | 0,840730961 | 0,46  | 0,225406554 | -0,41 | 0,539230722 |
| C8g           | 0,09  | 0,914090929 | -0,08 | 0,916255958 | 0,35  | 0,723037215 | 0,25  | 0,626350257 | 0,07  | 0,940092696 |
| C9            | 0,38  | 0,553849378 | -0,94 | 0,152328045 | -0,16 | 0,855887253 | 0,71  | 0,084982243 | -0,38 | 0,58512161  |
| C920006O11Rik | 0,15  | 0,784630487 | 0,19  | 0,790939978 | 0,01  | 0,996286252 | -0,64 | 0,072977347 | -0,05 | 0,966062799 |
| C920008G01Rik | 0,11  | 0,897717279 | -0,09 | 0,841090266 | -0,03 | 0,973732268 | 0,2   | 0,759281029 | -0,2  | 0,85945887  |
| C920009B18Rik | -0,41 | 0,559760851 | -0,7  | 0,494445434 | 0,46  | 0,685970854 | 1,02  | 0,231612783 | 0,02  | 0,990091016 |
| C920021L13Rik | 0,03  | 0,964154899 | -0,03 | 0,983071427 | -0,31 | 0,736837174 | 0,11  | 0,953222061 | 0,76  | 0,593298551 |
| Caap1         | -0,03 | 0,98297164  | -0,03 | 0,989327073 | -0,53 | 0,30528316  | 0,06  | 0,920036779 | 0,62  | 0,211018037 |
| Cab39         | -0,09 | 0,898672447 | -0,01 | 0,998237793 | -0,01 | 0,997581017 | 0,17  | 0,733247988 | 0,03  | 0,980801729 |
| Cab39l        | -0,27 | 0,790562605 | -0,15 | 0,828219939 | -0,72 | 0,209534486 | -0,12 | 0,862828669 | -0,03 | 0,981677577 |
| Cabin1        | -0,07 | 0,905414735 | -0,39 | 0,553056965 | -0,03 | 0,982305856 | 0,01  | 0,988205241 | -0,39 | 0,601753447 |
| Cables1       | -1,07 | 0,185196531 | -1,48 | 0,158696948 | 0,95  | 0,37721644  | -1,4  | 0,072026883 | -0,63 | 0,467165141 |
| Cables2       | 0,02  | 0,989346684 | 0,06  | 0,975427696 | 0,43  | 0,786933951 | -0,66 | 0,163529439 | -0,41 | 0,681187459 |
| Cabp1         | -0,08 | 0,922118639 | 0,02  | 0,992929085 | 0,25  | 0,777417583 | -0,89 | 0,220685038 | -0,39 | 0,749887358 |
| Cabp2         | 0,22  | 0,655130976 | -0,24 | 0,600177044 | -0,12 | 0,856605654 | -0,15 | 0,713260063 | -0,11 | 0,910185187 |
| Cabp4         | -0,03 | 0,983184832 | -0,12 | 0,864680059 | -0,26 | 0,771873685 | 0,11  | 0,855472984 | -0,41 | 0,376385479 |
| Cabp5         | 0,61  | 0,100798028 | -0,07 | 0,95775423  | -0,07 | 0,911921787 | 0,33  | 0,562084072 | 0,1   | 0,911736306 |
| Cabp7         | 0,35  | 0,597080663 | 0,22  | 0,772167537 | 0,53  | 0,308851346 | 0,13  | 0,729857506 | 0,62  | 0,286600165 |
| Cabs1         | 0,03  | 0,963914207 | 0,1   | 0,849473761 | -0,22 | 0,717856288 | 0,17  | 0,789931282 | 0,01  | 0,989300476 |
| Cabyr         | -0,32 | 0,687662951 | -0,13 | 0,915282997 | 0,01  | 0,996265665 | -0,33 | 0,639481438 | 0,07  | 0,949544475 |
| Cacfd1        | -0,46 | 0,492894586 | 0,19  | 0,885593556 | 0,56  | 0,478503279 | -0,09 | 0,883059585 | 0,38  | 0,525018839 |
| Cachd1        | -0,26 | 0,621078695 | 0,07  | 0,929717517 | 0,35  | 0,504024124 | -0,26 | 0,764489444 | -0,23 | 0,811975973 |
| Cacna1a       | 0,19  | 0,690172436 | -0,18 | 0,827141893 | -0,32 | 0,720069267 | -1,65 | 0,065973786 | -0,4  | 0,663140989 |

|          |       |             |       |             |       |             |       |             |       |             |
|----------|-------|-------------|-------|-------------|-------|-------------|-------|-------------|-------|-------------|
| Cacna1b  | 0,6   | 0,218444456 | 0,66  | 0,200639194 | 0,21  | 0,793014016 | 1,18  | 0,042082146 | 0,06  | 0,956755884 |
| Cacna1c  | -0,26 | 0,873484207 | -0,49 | 0,422003695 | -0,25 | 0,732675311 | -1,33 | 0,038615658 | -0,58 | 0,328817797 |
| Cacna1d  | -0,28 | 0,537473384 | 0,26  | 0,701492683 | -0,02 | 0,986800862 | -1,37 | 0,091159146 | 0,56  | 0,655814782 |
| Cacna1e  | 0,22  | 0,802334341 | 0,17  | 0,916496897 | -0,1  | 0,923350407 | -0,27 | 0,841445973 | -0,35 | 0,765256761 |
| Cacna1f  | -0,25 | 0,770273483 | -0,14 | 0,87095497  | -0,27 | 0,611911041 | -0,12 | 0,860889912 | -0,18 | 0,820234867 |
| Cacna1g  | -0,13 | 0,943079514 | -0,04 | 0,978904487 | 0,13  | 0,926183194 | 0,33  | 0,501004985 | 0,34  | 0,744888681 |
| Cacna1h  | 0,64  | 0,178589155 | 1,39  | 0,121175304 | -0,4  | 0,536255497 | -0,5  | 0,448106246 | -0,76 | 0,287590871 |
| Cacna1i  | -0,15 | 0,845508806 | 0,1   | 0,932292974 | 0,38  | 0,701085423 | 0,44  | 0,599213254 | -0,12 | 0,940438527 |
| Cacna1s  | -0,17 | 0,7494877   | -0,14 | 0,89081665  | -0,36 | 0,650759853 | 0,39  | 0,55864576  | 0,22  | 0,743227586 |
| Cacna2d1 | 0,24  | 0,892062603 | 0,47  | 0,830133019 | -0,11 | 0,955742302 | -0,38 | 0,812244154 | -0,67 | 0,590396118 |
| Cacna2d2 | -0,44 | 0,500832169 | 0,41  | 0,468865033 | -0,23 | 0,702677589 | -0,55 | 0,309985864 | -0,01 | 0,990091016 |
| Cacna2d3 | 0,3   | 0,597519827 | -0,1  | 0,906470847 | 0,21  | 0,687268336 | 0,19  | 0,802803581 | -0,07 | 0,949751787 |
| Cacna2d4 | 0,11  | 0,909036289 | -0,22 | 0,844512244 | 0,1   | 0,939807731 | 0,13  | 0,834736527 | 0,13  | 0,890957032 |
| Cacnb1   | 0,22  | 0,718996404 | 0,07  | 0,9554581   | 0,56  | 0,391984774 | -0,72 | 0,304619829 | 0,22  | 0,769280739 |
| Cacnb2   | -0,39 | 0,656726345 | 0,13  | 0,916340617 | 0,69  | 0,321761132 | -1,02 | 0,188844849 | -0,16 | 0,948163009 |
| Cacnb3   | -0,04 | 0,980913066 | -0,12 | 0,926178529 | 0,62  | 0,440550754 | -0,51 | 0,268683697 | -0,66 | 0,287590871 |
| Cacnb4   | 0,16  | 0,728608769 | -0,22 | 0,813516293 | -0,13 | 0,892881818 | 0,46  | 0,415968391 | -0,09 | 0,913414593 |
| Cacng1   | -0,02 | 0,991919022 | -0,59 | 0,200336704 | 0,11  | 0,944497706 | 0,57  | 0,393038798 | 0,34  | 0,661829904 |
| Cacng2   | -0,16 | 0,713874683 | -0,04 | 0,961370411 | -0,13 | 0,852858312 | 0,41  | 0,34029034  | 0,13  | 0,859663155 |
| Cacng3   | -0,01 | 0,986195087 | -0,31 | 0,663630296 | 0,12  | 0,887977305 | 0,11  | 0,95852873  | -0,5  | 0,766559546 |
| Cacng4   | -0,38 | 0,434470332 | -0,49 | 0,450538273 | 0,33  | 0,451450652 | 0,19  | 0,873221641 | -0,3  | 0,840952901 |
| Cacng5   | -0,43 | 0,32982243  | -0,06 | 0,970762922 | -0,07 | 0,922318683 | -0,33 | 0,539032331 | -0,29 | 0,587305934 |
| Cacng6   | 0,07  | 0,898116888 | -0,08 | 0,916255958 | 0,12  | 0,867543859 | -0,06 | 0,938144553 | -0,18 | 0,764656525 |
| Cacng7   | -0,21 | 0,829299665 | 0,44  | 0,719463865 | -0,03 | 0,985977985 | -0,68 | 0,245208151 | -0,37 | 0,63990854  |
| Cacng8   | -0,01 | 0,993175772 | -0,15 | 0,7561623   | -0,05 | 0,966910505 | 0,18  | 0,716994919 | 0,05  | 0,958259949 |
| Cactin   | -0,66 | 0,209702499 | -0,32 | 0,50179538  | -0,18 | 0,809137779 | -0,21 | 0,718299331 | -0,12 | 0,904931004 |
| Cacul1   | 0,05  | 0,960118288 | 0,31  | 0,541469535 | 0,36  | 0,628048897 | 0,69  | 0,260735009 | 0,1   | 0,940438527 |
| Cacybp   | -0,07 | 0,909304056 | 0,12  | 0,919762719 | 0,09  | 0,952888594 | 0,16  | 0,836992584 | 0,85  | 0,188623626 |
| Cad      | -0,67 | 0,220541198 | -1,14 | 0,12411466  | 0,72  | 0,225514917 | 1,01  | 0,03784406  | -0,6  | 0,268285941 |
| Cadm1    | 0,16  | 0,81630789  | 0,59  | 0,536246395 | 0,99  | 0,154586266 | -1,07 | 0,037337273 | 1,22  | 0,111687177 |
| Cadm2    | 0,11  | 0,897717279 | 0,14  | 0,87189957  | -0,2  | 0,743900482 | -0,52 | 0,490835105 | -0,29 | 0,731865047 |
| Cadm3    | -0,58 | 0,574608525 | -0,38 | 0,571596794 | -0,15 | 0,906275304 | 1,45  | 0,043143025 | 0,02  | 0,983613958 |
| Cadm4    | -0,01 | 0,994619271 | -0,1  | 0,882589938 | 0,29  | 0,697383223 | -0,22 | 0,587616882 | -0,03 | 0,978604922 |
| Cadps    | -0,01 | 0,994865169 | -0,21 | 0,693906911 | -0,29 | 0,723987482 | 0,59  | 0,327017947 | 0,1   | 0,936447878 |
| Cadps2   | 0,12  | 0,848224885 | 0,6   | 0,538702745 | -0,03 | 0,985347628 | -2,14 | 0,009182057 | 0,81  | 0,136921503 |

|          |       |             |       |             |       |             |       |             |       |             |
|----------|-------|-------------|-------|-------------|-------|-------------|-------|-------------|-------|-------------|
| Cage1    | 0,15  | 0,848780666 | 0,21  | 0,842145037 | 0,09  | 0,926192931 | -0,13 | 0,803725693 | 0,43  | 0,666758661 |
| Cahm     | 0,01  | 0,989017567 | -0,35 | 0,469990602 | -0,5  | 0,58363268  | -0,94 | 0,296322125 | -0,98 | 0,293516714 |
| Calb1    | -0,13 | 0,834148274 | 0,38  | 0,810418074 | -0,23 | 0,809062815 | -1,06 | 0,452966368 | -0,06 | 0,981927774 |
| Calb2    | 0,04  | 0,981747173 | 0,07  | 0,927205716 | -0,17 | 0,793687326 | -0,03 | 0,948836682 | -0,05 | 0,955910202 |
| Calca    | -0,03 | 0,981889402 | 0,16  | 0,855632384 | -0,31 | 0,562169896 | -1,5  | 0,01328151  | -0,53 | 0,334365666 |
| Calcb    | 1     | 0,183670641 | 0,11  | 0,849235875 | 0,48  | 0,550662565 | -0,37 | 0,407097145 | -0,41 | 0,559794251 |
| Calcoco1 | 0,02  | 0,976870178 | 0,4   | 0,485712513 | 0,42  | 0,60848236  | -0,88 | 0,110461589 | -0,59 | 0,32673984  |
| Calcoco2 | -0,14 | 0,874676538 | -0,13 | 0,932292974 | -0,18 | 0,868798569 | -0,26 | 0,80027497  | 0,1   | 0,949751787 |
| Calcr    | 0,13  | 0,832798869 | -0,14 | 0,802440628 | -0,23 | 0,805108461 | 0,02  | 0,966197507 | -0,25 | 0,757268602 |
| Calcrl   | -0,13 | 0,816534187 | -0,1  | 0,890945229 | 0,25  | 0,817818413 | -0,93 | 0,047627833 | 0,05  | 0,95985938  |
| Cald1    | -0,28 | 0,557855331 | 0,39  | 0,441083677 | -0,18 | 0,783326867 | -0,61 | 0,131960301 | -0,52 | 0,266985815 |
| Calhm1   | 0,18  | 0,72989626  | 0,24  | 0,518494408 | -0,27 | 0,572839142 | -0,08 | 0,878624064 | 0,14  | 0,830086988 |
| Calhm2   | -0,08 | 0,943079514 | -0,9  | 0,564039685 | 0,11  | 0,885556448 | -0,42 | 0,482571177 | -0,38 | 0,653551273 |
| Calm1    | -0,4  | 0,279941758 | -0,28 | 0,488817827 | 0,45  | 0,223806963 | 0,24  | 0,49016197  | 0,03  | 0,977247356 |
| Calm2    | -0,28 | 0,459857102 | -0,21 | 0,594415097 | 0,62  | 0,130504362 | -0,46 | 0,161975548 | -0,08 | 0,913274952 |
| Calm3    | -0,27 | 0,554603293 | -0,33 | 0,370515616 | 0,42  | 0,443039118 | 0,61  | 0,159021607 | -0,37 | 0,484862172 |
| Calm4    | 0,2   | 0,62872508  | 0,02  | 0,979113657 | -0,04 | 0,95907725  | 0,16  | 0,743625096 | -0,09 | 0,940084779 |
| Calm5    | 0,01  | 0,993735766 | 0,04  | 0,954024651 | -0,26 | 0,737241227 | -0,01 | 0,986768223 | 0,18  | 0,827150612 |
| Calml3   | -0,67 | 0,317205194 | 0,11  | 0,961370411 | -0,24 | 0,661089127 | -0,38 | 0,653147698 | 0     | 0,998332822 |
| Calml4   | 0,53  | 0,394018642 | -0,01 | 0,996336736 | 0,04  | 0,971268254 | -2,54 | 0,007149669 | 0,31  | 0,616961632 |
| Caln1    | 0,17  | 0,751568489 | 0,07  | 0,912535732 | -0,5  | 0,409295824 | -0,48 | 0,379160985 | -0,2  | 0,85806566  |
| Calr     | 0,04  | 0,94913976  | 0,06  | 0,943713379 | -0,1  | 0,885680687 | 0,48  | 0,276093686 | 0,4   | 0,365693467 |
| Calr3    | 0,27  | 0,568831614 | -0,09 | 0,919841135 | -0,63 | 0,24320522  | -0,11 | 0,830816671 | 0     | 0,996506997 |
| Calr4    | -0,04 | 0,97092604  | 0,38  | 0,726204935 | -0,28 | 0,628427952 | -0,11 | 0,903744147 | 0,15  | 0,887815327 |
| Calu     | -0,48 | 0,240534922 | -0,23 | 0,629175882 | 0,28  | 0,698662367 | 1,28  | 0,020395018 | -0,57 | 0,286600165 |
| Caly     | -0,11 | 0,859481811 | 0,24  | 0,532316439 | 0,13  | 0,877598693 | -0,21 | 0,671576377 | -0,16 | 0,833767072 |
| Camk1    | -0,11 | 0,840882072 | 0,21  | 0,765325717 | 0,66  | 0,278260113 | 0,13  | 0,708013098 | -0,05 | 0,953297732 |
| Camk1d   | -0,54 | 0,358591061 | -0,23 | 0,793476974 | -0,8  | 0,34148526  | -0,94 | 0,291158594 | -0,54 | 0,58294608  |
| Camk1g   | -0,14 | 0,823225169 | -0,02 | 0,992017084 | -0,38 | 0,597763422 | -0,19 | 0,768880868 | -0,49 | 0,323249283 |
| Camk2a   | 0,14  | 0,840446684 | 0,1   | 0,873640843 | -0,13 | 0,846689137 | -0,36 | 0,388936123 | -0,01 | 0,991628025 |
| Camk2b   | -0,39 | 0,652197824 | -0,04 | 0,960071209 | -0,21 | 0,864830074 | -0,14 | 0,746580621 | -0,14 | 0,838679773 |
| Camk2d   | 0     | 0,998873583 | 0,35  | 0,509013394 | -0,24 | 0,73893881  | 0,11  | 0,825017636 | 0,85  | 0,083181116 |
| Camk2g   | -0,41 | 0,379426903 | -0,08 | 0,901000778 | -0,27 | 0,757498725 | -0,46 | 0,433057586 | -0,24 | 0,765565207 |
| Camk2n1  | 0,07  | 0,903817676 | 0,43  | 0,360218206 | 0     | 0,997268369 | -0,46 | 0,329098653 | 0,07  | 0,933759514 |
| Camk2n2  | -0,28 | 0,728739942 | 0,11  | 0,920978856 | 0,66  | 0,474169312 | 0,35  | 0,59247939  | 0,14  | 0,861977667 |

|         |       |             |       |             |       |             |       |             |       |             |
|---------|-------|-------------|-------|-------------|-------|-------------|-------|-------------|-------|-------------|
| Camk4   | -0,48 | 0,239601221 | -0,24 | 0,660121081 | 0,34  | 0,797422121 | 0,12  | 0,779616632 | 0,11  | 0,895204987 |
| Camkk1  | -0,79 | 0,148685247 | -0,09 | 0,974159037 | 0,26  | 0,694941328 | 0,52  | 0,522565631 | -0,21 | 0,862867603 |
| Camkk2  | -0,38 | 0,339051395 | -0,24 | 0,6840278   | 0,29  | 0,542385406 | -0,67 | 0,254784646 | -0,5  | 0,465936748 |
| Camkmt  | -0,67 | 0,446515613 | -1,1  | 0,145787722 | -0,02 | 0,992972594 | -0,1  | 0,914137643 | -0,27 | 0,860918217 |
| Camkv   | -0,02 | 0,981777139 | 0,11  | 0,868234125 | -0,08 | 0,917694073 | 0,04  | 0,932800758 | 0,14  | 0,897541889 |
| Caml    | 0,12  | 0,799493751 | -0,07 | 0,897574732 | -0,12 | 0,856046789 | 0,05  | 0,926317009 | -0,08 | 0,937558003 |
| Camp    | -0,42 | 0,569203163 | -0,12 | 0,831404974 | -0,05 | 0,964695682 | -0,61 | 0,446858732 | -0,56 | 0,628127128 |
| Camsap1 | 0,01  | 0,992615147 | 0,12  | 0,909161274 | 0,02  | 0,991416175 | 0,27  | 0,545758277 | 0,27  | 0,725001296 |
| Camsap2 | 0,15  | 0,762165257 | 0     | 1           | -0,05 | 0,950076566 | -0,45 | 0,19225115  | -0,02 | 0,982175252 |
| Camsap3 | 0,23  | 0,712552818 | 0,16  | 0,842054694 | 0,82  | 0,174610967 | -0,37 | 0,516674123 | -0,35 | 0,590339443 |
| Camta1  | 0,29  | 0,72711401  | 0,39  | 0,683794132 | 0,13  | 0,922318683 | -0,86 | 0,188842869 | 0,16  | 0,813513601 |
| Camta2  | -0,21 | 0,74764092  | -0,13 | 0,781665479 | 0,23  | 0,805783058 | 0,16  | 0,680778962 | -0,33 | 0,567306543 |
| Cand1   | -0,21 | 0,656095444 | -0,01 | 0,996113371 | 0,19  | 0,823823322 | 1,07  | 0,274576325 | 0,17  | 0,914176188 |
| Cand2   | -0,14 | 0,886741208 | -0,28 | 0,778496491 | 0,64  | 0,565284752 | 0,09  | 0,947809027 | -0,56 | 0,593599703 |
| Cant1   | -0,31 | 0,59710379  | -0,11 | 0,855632384 | 0,3   | 0,702677589 | 0,05  | 0,923775458 | -0,32 | 0,593298551 |
| Canx    | -0,12 | 0,784951771 | -0,05 | 0,917623085 | 0,27  | 0,591404136 | 0,18  | 0,66295728  | 0     | 0,994637097 |
| Cap1    | 0,2   | 0,633989663 | 0,14  | 0,733269724 | 0,12  | 0,872313115 | 0,64  | 0,066910258 | 0,28  | 0,583631554 |
| Cap2    | -0,73 | 0,36631183  | -0,14 | 0,850970384 | -0,29 | 0,541816551 | -1,15 | 0,177649418 | -0,28 | 0,847312006 |
| Capg    | -0,12 | 0,822613889 | 0,07  | 0,904794174 | 0,05  | 0,946842192 | 2,62  | 0,003977829 | 0,55  | 0,440559239 |
| Capn1   | 0     | 0,998584113 | 0,18  | 0,821227978 | 0,51  | 0,328009827 | 0,27  | 0,725819812 | 0,35  | 0,708051749 |
| Capn10  | -0,66 | 0,239601221 | -0,42 | 0,621658056 | -0,34 | 0,654328013 | 0,15  | 0,87630843  | -0,29 | 0,699060093 |
| Capn11  | 0,68  | 0,639364854 | 0,24  | 0,852461907 | 0,01  | 0,996260936 | -0,06 | 0,949578813 | 0,48  | 0,676435667 |
| Capn12  | -0,2  | 0,877942803 | -0,03 | 0,98237484  | -0,25 | 0,723002297 | 0,28  | 0,39058196  | -0,35 | 0,47833296  |
| Capn13  | 0,24  | 0,641715721 | -0,26 | 0,670902144 | -0,17 | 0,83322073  | 0,57  | 0,248903766 | -0,19 | 0,824818547 |
| Capn15  | -0,33 | 0,586970138 | -0,01 | 0,994486533 | 0     | 0,999931921 | 0,19  | 0,732480354 | 0,04  | 0,970428221 |
| Capn2   | -0,46 | 0,417482906 | -0,8  | 0,256702217 | 0,33  | 0,525667021 | -0,27 | 0,432661432 | -0,45 | 0,444327869 |
| Capn3   | 0,08  | 0,945173755 | -0,18 | 0,871465135 | -0,2  | 0,860923344 | 0,2   | 0,752798946 | 0,01  | 0,991216325 |
| Capn5   | 0,32  | 0,692923111 | -0,09 | 0,952352299 | -0,15 | 0,907570167 | -0,52 | 0,362165899 | 0,37  | 0,604239727 |
| Capn6   | -0,32 | 0,662416763 | -0,33 | 0,49941722  | -0,28 | 0,688126003 | 0,2   | 0,650323576 | -0,49 | 0,420209311 |
| Capn7   | -0,02 | 0,975949545 | 0,05  | 0,928036933 | -0,11 | 0,870377336 | -0,33 | 0,600349504 | 0,11  | 0,916173996 |
| Capn8   | 0,39  | 0,467085712 | 0,13  | 0,842054694 | -0,43 | 0,332905005 | 0,19  | 0,627089222 | 0,31  | 0,561876467 |
| Capn9   | -0,07 | 0,927866076 | 0,5   | 0,302028989 | -0,28 | 0,566351122 | -0,62 | 0,239653037 | -0,37 | 0,563213699 |
| Capns1  | -0,19 | 0,617560667 | -0,22 | 0,591276007 | 0,23  | 0,661860407 | 0,14  | 0,737156887 | -0,34 | 0,521841588 |
| Capns2  | 0,27  | 0,697496197 | -0,16 | 0,750555245 | 0,01  | 0,995628179 | -0,1  | 0,875014892 | 0,23  | 0,759953618 |
| Caprin1 | 0,09  | 0,870052902 | 0,08  | 0,910184435 | 0,46  | 0,60025983  | 0,99  | 0,26366409  | 0,48  | 0,617632274 |

|         |       |             |       |             |       |             |       |             |       |             |
|---------|-------|-------------|-------|-------------|-------|-------------|-------|-------------|-------|-------------|
| Caprin2 | -0,79 | 0,555287219 | -0,12 | 0,924138252 | 1,38  | 0,435556279 | -1,63 | 0,038098432 | -0,23 | 0,824818547 |
| Caps2   | 0,09  | 0,911843212 | -0,05 | 0,948441665 | -0,07 | 0,926258799 | -0,15 | 0,824677929 | -0,37 | 0,558284622 |
| Capsl   | 0,09  | 0,869225685 | 0,15  | 0,842663656 | -0,12 | 0,885556448 | -1,99 | 0,087280832 | -1,18 | 0,323249283 |
| Capza1  | -0,05 | 0,925460743 | -0,11 | 0,819802664 | 0,06  | 0,929342362 | 0,95  | 0,026972102 | 0,13  | 0,830813323 |
| Capza2  | 0,18  | 0,743485447 | 0,26  | 0,660121081 | 0,36  | 0,515835379 | 0,01  | 0,996900471 | 0,53  | 0,34132728  |
| Capza3  | 0,17  | 0,687502794 | 0,22  | 0,789363581 | -0,21 | 0,703045192 | -0,16 | 0,642618381 | -0,06 | 0,951471487 |
| Capzb   | -0,22 | 0,571722624 | -0,42 | 0,269454176 | 0,1   | 0,901539354 | 0,77  | 0,041009258 | -0,19 | 0,741456572 |
| Car1    | 0,3   | 0,487571132 | -0,28 | 0,674643073 | 0     | 0,998779926 | -0,14 | 0,8839352   | -0,09 | 0,949178165 |
| Car10   | 0,67  | 0,115796523 | 0,24  | 0,78064709  | -0,08 | 0,909371204 | 0,04  | 0,95852873  | -0,18 | 0,819072786 |
| Car11   | -0,12 | 0,893842739 | 0,31  | 0,66616142  | 0,13  | 0,841563482 | -0,54 | 0,568512757 | -0,5  | 0,684401515 |
| Car12   | 0,33  | 0,613243355 | 0,19  | 0,648582774 | -0,11 | 0,90345282  | -0,44 | 0,334704308 | 0     | 0,997106233 |
| Car13   | 0,27  | 0,511327214 | 0,09  | 0,855111544 | 0,02  | 0,985326269 | 1,49  | 0,064018281 | 0,13  | 0,929780699 |
| Car14   | 0,21  | 0,772271378 | 0,63  | 0,317236181 | -0,49 | 0,418524099 | -0,23 | 0,635869722 | -0,06 | 0,948935854 |
| Car15   | 0,73  | 0,175830295 | -0,42 | 0,630199793 | 0,61  | 0,264885341 | -0,24 | 0,733598985 | -0,35 | 0,574285481 |
| Car2    | 0,61  | 0,400980668 | -0,82 | 0,488692084 | 1,05  | 0,387573388 | 2,77  | 0,005620327 | 1,35  | 0,026743805 |
| Car3    | 0,16  | 0,762383046 | -0,31 | 0,610087096 | -0,63 | 0,500343254 | -1,49 | 0,012175785 | -1,23 | 0,032750472 |
| Car4    | 2,06  | 0,124239016 | 0,03  | 0,972651649 | 1,09  | 0,05895383  | 4     | 0,03784406  | -1,82 | 0,244965154 |
| Car5a   | 0,23  | 0,78476082  | -0,31 | 0,615058004 | -0,04 | 0,971065691 | 0,69  | 0,151254716 | 0,12  | 0,904040121 |
| Car5b   | -0,23 | 0,727413551 | -1,04 | 0,104971247 | -0,31 | 0,654391221 | 0,28  | 0,424862937 | 0,01  | 0,991628025 |
| Car6    | 0,07  | 0,936998246 | 0,05  | 0,935130004 | 0,38  | 0,656894717 | 0,15  | 0,818693228 | -0,15 | 0,860469017 |
| Car7    | -0,5  | 0,337563637 | 0,12  | 0,916730432 | -0,58 | 0,396708254 | -2,71 | 0,009073953 | 0,07  | 0,940092696 |
| Car8    | 0,56  | 0,38528369  | 1,26  | 0,243936374 | -1    | 0,172712848 | -3,33 | 0,00856523  | -0,51 | 0,434238529 |
| Car9    | 0,9   | 0,159480198 | 0,02  | 0,997935558 | -0,12 | 0,934636205 | 0,96  | 0,133760303 | 0,09  | 0,940438527 |
| Card10  | -0,96 | 0,202131121 | -0,28 | 0,548858367 | -0,05 | 0,953951069 | -0,68 | 0,176649178 | -0,39 | 0,554975763 |
| Card11  | -0,24 | 0,635984358 | -0,34 | 0,400515868 | -0,49 | 0,61483831  | 0,33  | 0,62182809  | -0,01 | 0,993413582 |
| Card14  | 0,17  | 0,818587047 | -0,14 | 0,810470037 | -0,59 | 0,225213429 | -0,04 | 0,949763837 | 0,07  | 0,945902963 |
| Card19  | 0,22  | 0,61300824  | -0,07 | 0,881931938 | -0,13 | 0,859198005 | -0,42 | 0,246242665 | 0,3   | 0,574516113 |
| Card6   | 0,07  | 0,951710261 | 0,28  | 0,808772481 | 0,85  | 0,632676478 | -0,36 | 0,776545078 | 0,76  | 0,692016525 |
| Card9   | -0,36 | 0,430696208 | 0,09  | 0,953198116 | -0,21 | 0,805711305 | -0,02 | 0,987801512 | -0,02 | 0,986971861 |
| Carf    | -0,61 | 0,537473384 | 0,39  | 0,382932469 | 1,12  | 0,292557534 | -0,15 | 0,86294121  | -0,04 | 0,981439632 |
| Carhsp1 | 0     | 0,99542017  | 0,09  | 0,852719676 | -0,06 | 0,949334141 | -0,27 | 0,687105021 | 0,22  | 0,815694752 |
| Carkd   | 0,58  | 0,231822698 | -0,02 | 0,978904487 | -0,17 | 0,750624323 | -0,19 | 0,667849424 | -0,09 | 0,923606452 |
| Carm1   | -0,34 | 0,436489637 | -0,27 | 0,468035796 | 0,05  | 0,955079905 | 0,27  | 0,469378969 | -0,36 | 0,482207706 |
| Carnmt1 | -0,11 | 0,897717279 | -0,29 | 0,670412523 | 0,59  | 0,406974641 | 0,41  | 0,351508285 | 0,48  | 0,306747854 |
| Carns1  | 0,03  | 0,968309565 | -0,33 | 0,641804702 | -0,07 | 0,916403684 | 0,6   | 0,219519453 | -0,13 | 0,890957032 |



|           |       |             |       |             |       |             |       |             |       |             |
|-----------|-------|-------------|-------|-------------|-------|-------------|-------|-------------|-------|-------------|
| Cars      | 0,44  | 0,471980619 | 0,55  | 0,176214568 | 0,53  | 0,638965268 | 0,69  | 0,203234246 | 1,19  | 0,043727018 |
| Cars2     | 0,04  | 0,964869618 | 0,06  | 0,934627513 | -0,04 | 0,972847253 | -0,25 | 0,669653978 | -0,68 | 0,321777445 |
| Cartpt    | 0,31  | 0,530808572 | -0,15 | 0,831129237 | 0,3   | 0,637444183 | 0,31  | 0,380179865 | 0,01  | 0,992438465 |
| Casc1     | 0,19  | 0,834363561 | 0,39  | 0,517071375 | 0,1   | 0,921090652 | -0,02 | 0,971334673 | 0,33  | 0,702558142 |
| Casc3     | -0,33 | 0,602723417 | -0,08 | 0,89518658  | 0,19  | 0,746677927 | 0,13  | 0,884326814 | -0,17 | 0,861506431 |
| Casc4     | -0,2  | 0,900340189 | -1,01 | 0,38050231  | 1,83  | 0,044860581 | -1,55 | 0,157847916 | -0,66 | 0,506316926 |
| Casc5     | -0,94 | 0,156998083 | -1,62 | 0,158696948 | 1,05  | 0,483029329 | 2,45  | 0,04743648  | 0,07  | 0,969617491 |
| Casd1     | -0,06 | 0,963354913 | 0,08  | 0,951768918 | 0,37  | 0,659221613 | -0,41 | 0,597332937 | -0,12 | 0,914903084 |
| Cask      | 0,45  | 0,346575965 | 0,74  | 0,193641859 | -0,38 | 0,645449124 | 0,79  | 0,566165959 | 0,56  | 0,708898543 |
| Caskin1   | 0,18  | 0,6594148   | 0,3   | 0,558817769 | -0,22 | 0,779970041 | -0,38 | 0,206882609 | -0,1  | 0,91314596  |
| Caskin2   | -0,01 | 0,993728727 | 0,19  | 0,750160982 | -0,67 | 0,194482851 | -1,27 | 0,029700829 | 0     | 0,999221841 |
| Casp1     | 1,15  | 0,327334452 | 1,06  | 0,107449087 | -1,91 | 0,007179133 | 0,19  | 0,706619788 | 1,08  | 0,044184099 |
| Casp12    | 0,75  | 0,54401985  | 0,76  | 0,356622203 | -1,02 | 0,04780109  | 0,44  | 0,611737807 | 1,06  | 0,135418412 |
| Casp14    | 0,48  | 0,409868128 | 0,99  | 0,080905656 | -0,54 | 0,370554673 | -0,3  | 0,403529227 | -0,14 | 0,923951087 |
| Casp16-ps | 0,24  | 0,68349407  | -0,27 | 0,70313883  | -0,12 | 0,877598693 | 0,08  | 0,886806548 | 0,48  | 0,324281141 |
| Casp2     | 0,04  | 0,966775766 | -0,3  | 0,865660484 | 0,41  | 0,776419989 | -0,46 | 0,152307397 | -0,17 | 0,830813323 |
| Casp3     | -0,1  | 0,853351904 | -0,07 | 0,89474699  | 0,41  | 0,560847022 | 2     | 0,031060548 | 0,22  | 0,824818547 |
| Casp4     | 1,49  | 0,027081255 | 0,84  | 0,138101221 | -1,32 | 0,009960811 | 0,68  | 0,152261034 | 1,46  | 0,014694741 |
| Casp6     | -0,15 | 0,79498488  | -0,08 | 0,936322898 | -0,33 | 0,808747196 | 0,54  | 0,222873292 | -0,62 | 0,415647725 |
| Casp7     | -0,16 | 0,805313174 | 0,39  | 0,469830103 | -0,33 | 0,589982818 | 0,91  | 0,073159365 | 0,92  | 0,104212171 |
| Casp8     | 0,06  | 0,927480617 | 0,2   | 0,620625308 | 0,33  | 0,464103328 | 0,56  | 0,161626639 | 0,38  | 0,435285665 |
| Casp8ap2  | -0,11 | 0,906392346 | -0,34 | 0,841184864 | -0,12 | 0,904132011 | -0,13 | 0,839891505 | 0,15  | 0,844105751 |
| Casp9     | -0,12 | 0,840623963 | -0,08 | 0,893005076 | 0,23  | 0,736445534 | -0,3  | 0,449259448 | -0,32 | 0,530072156 |
| Casq1     | 0,01  | 0,993175772 | -0,32 | 0,783862212 | 0,83  | 0,319105917 | 0,04  | 0,983166423 | -0,6  | 0,655657337 |
| Casq2     | -0,16 | 0,903082893 | -0,17 | 0,794646176 | -0,01 | 0,993379272 | -0,16 | 0,811871922 | -0,45 | 0,558798237 |
| Casr      | -0,19 | 0,80377975  | 0,14  | 0,903089182 | 0,04  | 0,956894731 | -0,69 | 0,124162112 | -0,28 | 0,760587652 |
| Cass4     | 0,17  | 0,764189777 | -0,16 | 0,88052282  | 0,23  | 0,765490406 | -0,06 | 0,950082402 | -0,02 | 0,986720141 |
| Cast      | -0,2  | 0,660425888 | -0,07 | 0,898163027 | 0,27  | 0,548750983 | 0,08  | 0,838352831 | 0,35  | 0,493644751 |
| Casz1     | 0,14  | 0,889978058 | 0,16  | 0,859954464 | -0,09 | 0,918291931 | -0,2  | 0,56514466  | 0,62  | 0,395174487 |
| Cat       | -0,17 | 0,685826767 | -0,43 | 0,532181703 | 0,52  | 0,515467885 | -0,03 | 0,963752888 | -0,47 | 0,361463997 |
| Catip     | -0,04 | 0,953324702 | -0,27 | 0,732847182 | 0,27  | 0,705811313 | 0,52  | 0,390869984 | 0,07  | 0,951429597 |
| Catsper1  | -0,17 | 0,766575514 | 0,47  | 0,277253387 | -0,12 | 0,865145801 | -0,35 | 0,618209904 | -0,04 | 0,977599806 |
| Catsper2  | -0,08 | 0,935927529 | 0,35  | 0,425965031 | 0,14  | 0,911601881 | -0,64 | 0,35762546  | 0,26  | 0,864540232 |
| Catsper3  | 0,31  | 0,640236418 | 0,02  | 0,99605452  | 0,67  | 0,321560439 | -0,27 | 0,858484804 | -0,15 | 0,915363101 |
| Catsper4  | 0,4   | 0,721797378 | 0,29  | 0,704681588 | -0,23 | 0,707539555 | -0,36 | 0,5508774   | 0,1   | 0,958259949 |

|           |       |             |       |             |       |             |       |             |       |             |
|-----------|-------|-------------|-------|-------------|-------|-------------|-------|-------------|-------|-------------|
| Catsperb  | 0,06  | 0,948926586 | -0,3  | 0,773969614 | 0,02  | 0,98773763  | 0,05  | 0,920828834 | -0,13 | 0,885318142 |
| Catsperd  | 0,13  | 0,922118639 | -0,09 | 0,937377463 | -0,27 | 0,645430699 | 0,22  | 0,769374738 | 0,28  | 0,675339958 |
| Catsperg2 | -0,37 | 0,703606438 | -1,23 | 0,0802723   | -0,06 | 0,975866042 | 0,14  | 0,8556361   | -0,52 | 0,581275203 |
| Cav1      | -0,21 | 0,758636946 | -0,17 | 0,771641267 | 0,45  | 0,726640095 | 1,81  | 0,010692197 | -0,82 | 0,279515684 |
| Cav2      | -0,09 | 0,922118639 | -0,1  | 0,91395667  | 0,3   | 0,671012215 | 0,47  | 0,309536931 | -0,47 | 0,405585417 |
| Cav3      | -0,1  | 0,875396151 | 0,02  | 0,981758111 | -0,15 | 0,810187425 | 0,04  | 0,923386035 | -0,02 | 0,980961333 |
| Cbarp     | -0,11 | 0,870367016 | 0,08  | 0,937377463 | 0,54  | 0,309053396 | -0,38 | 0,621784468 | -0,02 | 0,990633766 |
| Cbfa2t2   | -0,4  | 0,588801063 | 0,35  | 0,429168189 | -0,23 | 0,778383291 | 0,18  | 0,921731995 | 0,26  | 0,904770312 |
| Cbfa2t3   | -0,05 | 0,953003466 | -0,3  | 0,511371517 | 0,07  | 0,92936515  | -1,59 | 0,01851295  | -0,56 | 0,32844976  |
| Cbfb      | 0,21  | 0,658266451 | -0,01 | 0,99611256  | -0,33 | 0,661747229 | 0,51  | 0,508183817 | 0,31  | 0,738412365 |
| Cbl       | 0,05  | 0,928103232 | 0,16  | 0,792112243 | 0,05  | 0,96260087  | -0,09 | 0,870713819 | -0,49 | 0,311343214 |
| Cblb      | 0,71  | 0,116800904 | 0,4   | 0,614530823 | -0,68 | 0,304508106 | 1,54  | 0,041009258 | -0,06 | 0,956610289 |
| Cblc      | 0,5   | 0,424529546 | 0,14  | 0,912535732 | 0,05  | 0,966921005 | 0,17  | 0,759084609 | 0,22  | 0,753779416 |
| Cbl1      | -0,1  | 0,894555208 | 0,21  | 0,817110093 | 0,3   | 0,777810365 | -0,05 | 0,958172386 | -0,11 | 0,896074058 |
| Cbln1     | 0,12  | 0,81629489  | -0,04 | 0,954502447 | 0,12  | 0,867571963 | -0,42 | 0,58168661  | -0,35 | 0,703332663 |
| Cbln2     | 0,14  | 0,808572184 | 0,04  | 0,970020205 | -0,11 | 0,933384842 | 0,07  | 0,90038088  | 0,3   | 0,562557824 |
| Cbln3     | 0,36  | 0,576339674 | -0,42 | 0,767405529 | -0,27 | 0,875478207 | 0,35  | 0,463380113 | -0,01 | 0,992499729 |
| Cbln4     | 0,05  | 0,94957731  | 0,27  | 0,488525923 | -0,17 | 0,8290371   | -0,32 | 0,29766037  | 0,14  | 0,908981592 |
| Cbr1      | 0,24  | 0,867243066 | -0,15 | 0,794404033 | -0,07 | 0,959437564 | -0,2  | 0,687073625 | -0,27 | 0,794054354 |
| Cbr2      | -0,22 | 0,797266879 | -0,3  | 0,565914475 | -0,2  | 0,83818085  | -0,78 | 0,301311253 | -0,4  | 0,742614391 |
| Cbr3      | -0,2  | 0,800023642 | -0,35 | 0,669073556 | 0,29  | 0,59851611  | 0,2   | 0,768368149 | 0,17  | 0,88762419  |
| Cbr4      | -0,36 | 0,589124269 | 0,17  | 0,852461907 | 0,31  | 0,770526999 | 0,07  | 0,932312961 | 0,23  | 0,827532593 |
| Cbs       | -0,3  | 0,586708392 | 0,12  | 0,88741189  | 0,13  | 0,82162081  | -0,15 | 0,768880868 | -0,2  | 0,764656525 |
| Cbwd1     | 0,23  | 0,724502628 | -0,26 | 0,649611595 | 0,64  | 0,374422909 | 0,08  | 0,954542487 | -0,33 | 0,788112596 |
| Cbx1      | -0,22 | 0,715493304 | -0,08 | 0,906267371 | 0,41  | 0,70635953  | 0,49  | 0,646776742 | 0,28  | 0,830788023 |
| Cbx2      | 0,06  | 0,929247775 | 0,22  | 0,667502888 | 0,13  | 0,870377336 | -0,23 | 0,601996277 | -0,01 | 0,991980521 |
| Cbx3      | -0,37 | 0,355118268 | -0,58 | 0,541301427 | 0,28  | 0,57717258  | 0,44  | 0,529746075 | -0,1  | 0,89672305  |
| Cbx4      | -0,14 | 0,843029805 | 0,2   | 0,818597532 | 0,22  | 0,688643408 | -0,37 | 0,36015285  | 0,22  | 0,694007461 |
| Cbx5      | -0,74 | 0,179001759 | -1,32 | 0,104971247 | 0,13  | 0,892306682 | 0,35  | 0,468239117 | -0,38 | 0,601481833 |
| Cbx6      | -0,61 | 0,132157697 | -0,27 | 0,720667099 | -0,14 | 0,902707605 | -0,58 | 0,202259491 | -0,7  | 0,272223679 |
| Cbx7      | -0,29 | 0,650052108 | -0,1  | 0,946885634 | -0,01 | 0,997145286 | -2,43 | 0,038569152 | -0,66 | 0,486708315 |
| Cbx8      | 0,06  | 0,936700983 | 0,23  | 0,637448401 | 0,52  | 0,524391219 | -0,91 | 0,266016367 | -0,69 | 0,429206436 |
| Cby1      | 0     | 0,999288019 | 0,13  | 0,781046971 | 0,28  | 0,759124285 | 0,6   | 0,588987424 | -0,16 | 0,934128771 |
| Cby3      | 0,22  | 0,704646948 | 0,05  | 0,957659362 | 0     | 0,997220401 | -0,12 | 0,81096279  | -0,34 | 0,530072156 |
| Cc2d1a    | -0,4  | 0,443047489 | -0,33 | 0,641052915 | 0,14  | 0,861307315 | 0,24  | 0,684777287 | -0,14 | 0,871038748 |

|          |       |             |       |             |       |             |       |             |       |             |
|----------|-------|-------------|-------|-------------|-------|-------------|-------|-------------|-------|-------------|
| Cc2d1b   | -0,71 | 0,155484811 | -0,35 | 0,666450149 | 0,32  | 0,740917728 | 0,49  | 0,476284901 | 0,19  | 0,810820885 |
| Cc2d2a   | -1,33 | 0,062721706 | -0,83 | 0,527716421 | 0,59  | 0,63494846  | -0,4  | 0,566714831 | -0,52 | 0,360718516 |
| Ccar1    | -0,15 | 0,728539265 | -0,28 | 0,695689103 | -0,2  | 0,727809441 | 0,3   | 0,551429713 | -0,13 | 0,865258929 |
| Ccar2    | -0,15 | 0,807062435 | -0,18 | 0,729194445 | 0,05  | 0,95976212  | 0,3   | 0,661795846 | 0,15  | 0,869765418 |
| Ccbe1    | 0,05  | 0,970660999 | 0,74  | 0,20333065  | 0,24  | 0,808269569 | -0,72 | 0,064119729 | 0,18  | 0,875421436 |
| Ccbl1    | -0,52 | 0,402692178 | -0,2  | 0,88741189  | -0,81 | 0,366234911 | -1,6  | 0,136139745 | -1,55 | 0,146960218 |
| Ccbl2    | 1,17  | 0,290507258 | 1,32  | 0,138647411 | -0,5  | 0,478427765 | -0,06 | 0,952797297 | 1,94  | 0,015668823 |
| Ccdc102a | -0,2  | 0,754092173 | 0,21  | 0,832655657 | 0,55  | 0,213356796 | -0,4  | 0,414522125 | -0,4  | 0,591125071 |
| Ccdc103  | 0,14  | 0,867243066 | -0,18 | 0,870776847 | 0,17  | 0,830541787 | -0,21 | 0,859914509 | -1,31 | 0,159047845 |
| Ccdc105  | 0,42  | 0,244269955 | 0,33  | 0,664765388 | -0,56 | 0,282288312 | 0     | 1           | 0,21  | 0,845218636 |
| Ccdc106  | -0,07 | 0,905414735 | 0,12  | 0,857490594 | -0,06 | 0,939807731 | 0,14  | 0,84134133  | 0,15  | 0,864373858 |
| Ccdc107  | 0,06  | 0,924420943 | -0,18 | 0,882847123 | 0,29  | 0,770526999 | -0,21 | 0,765256666 | -0,42 | 0,447019099 |
| Ccdc108  | 0,24  | 0,744352714 | 0,28  | 0,774182449 | -0,07 | 0,925245169 | -0,38 | 0,561656192 | -0,29 | 0,593298551 |
| Ccdc109b | 0,47  | 0,466960111 | 0,63  | 0,388579184 | -0,4  | 0,660394995 | 0,77  | 0,146784762 | 0,42  | 0,428502729 |
| Ccdc110  | -0,41 | 0,733836599 | -0,79 | 0,428093777 | -0,03 | 0,96858449  | 0,3   | 0,608614479 | -0,43 | 0,566248044 |
| Ccdc112  | -0,13 | 0,909291259 | -0,47 | 0,629493333 | 0,47  | 0,491022708 | -0,33 | 0,610149813 | 0,33  | 0,708898543 |
| Ccdc113  | 0,58  | 0,353022744 | -0,56 | 0,373555617 | -0,51 | 0,467503988 | 0,29  | 0,840911664 | 0,09  | 0,921253042 |
| Ccdc114  | -0,03 | 0,962857082 | -0,47 | 0,696259711 | -0,1  | 0,914301036 | 0,15  | 0,885958674 | -0,1  | 0,917844354 |
| Ccdc115  | -0,23 | 0,687662951 | -0,14 | 0,847821325 | 0,39  | 0,799586974 | -0,09 | 0,90213506  | 0,35  | 0,628127128 |
| Ccdc116  | 0,18  | 0,773748538 | 0,02  | 0,985151214 | 0,2   | 0,704593934 | 0,19  | 0,698362346 | -0,11 | 0,891925115 |
| Ccdc117  | 0,02  | 0,984967814 | 0,32  | 0,559315429 | 0,11  | 0,864411302 | 0,38  | 0,418410394 | 0,69  | 0,266819789 |
| Ccdc12   | -0,2  | 0,676906193 | -0,12 | 0,842663656 | 0,24  | 0,764668807 | -0,16 | 0,653627438 | 0,16  | 0,825564898 |
| Ccdc120  | 0,23  | 0,783200207 | -0,19 | 0,669166333 | 0,18  | 0,926286415 | 0,01  | 0,985627977 | -0,22 | 0,797167184 |
| Ccdc121  | 0,02  | 0,983516046 | -0,05 | 0,919602924 | 0,07  | 0,935103428 | 0,01  | 0,987229847 | 0,65  | 0,208442957 |
| Ccdc122  | 0,06  | 0,939989529 | 0,61  | 0,219055424 | 0,94  | 0,099237376 | -0,17 | 0,885417869 | -0,1  | 0,939465567 |
| Ccdc124  | -0,22 | 0,602588901 | -0,35 | 0,436251163 | 0,06  | 0,950846671 | 0,42  | 0,437441721 | -0,06 | 0,959573673 |
| Ccdc125  | -0,51 | 0,602407328 | 0,16  | 0,919762719 | 0,48  | 0,632167655 | -0,18 | 0,900641924 | -0,58 | 0,723861142 |
| Ccdc126  | 0,1   | 0,904763794 | -0,3  | 0,494161701 | 0,53  | 0,65528516  | 0,56  | 0,212666842 | -0,12 | 0,939127163 |
| Ccdc127  | -0,31 | 0,451211285 | -0,15 | 0,852461907 | 0,15  | 0,777417583 | 0,11  | 0,874607411 | -0,1  | 0,936246118 |
| Ccdc129  | 0,38  | 0,54401985  | 0,11  | 0,932628106 | -0,36 | 0,628048897 | -0,04 | 0,97407078  | 0,4   | 0,68987325  |
| Ccdc13   | 0,09  | 0,889252203 | 0,22  | 0,680476065 | 0,08  | 0,929155794 | 0,09  | 0,814810741 | -0,07 | 0,943668392 |
| Ccdc130  | -0,31 | 0,652819827 | 0,75  | 0,162405391 | -0,61 | 0,381630813 | -1,21 | 0,096403516 | -0,08 | 0,958113093 |
| Ccdc134  | 0,32  | 0,604692463 | 0,52  | 0,55011938  | 0,61  | 0,419537272 | -0,48 | 0,443067556 | -0,05 | 0,950267521 |
| Ccdc136  | 0,21  | 0,695344327 | -0,06 | 0,926178529 | 0,21  | 0,815233527 | 0,38  | 0,425620746 | 0,25  | 0,788546035 |
| Ccdc137  | -0,03 | 0,969486005 | -0,28 | 0,756250782 | -0,22 | 0,839319788 | 0,23  | 0,680503649 | -0,42 | 0,503082469 |

|           |       |             |       |             |       |             |       |             |       |             |
|-----------|-------|-------------|-------|-------------|-------|-------------|-------|-------------|-------|-------------|
| Ccdc138   | -0,28 | 0,842297453 | -0,17 | 0,852453028 | 0,06  | 0,969570532 | 0,56  | 0,551171852 | 0,01  | 0,996625245 |
| Ccdc14    | -0,54 | 0,351889801 | -0,47 | 0,479020139 | 0,67  | 0,423157037 | -0,18 | 0,842024152 | -0,64 | 0,461765323 |
| Ccdc141   | -0,02 | 0,993175772 | -0,24 | 0,900474924 | 0,38  | 0,782988471 | -1,24 | 0,346558785 | 0,08  | 0,975441362 |
| Ccdc142   | -0,11 | 0,915927879 | -0,13 | 0,883145635 | -0,11 | 0,925245169 | -1,11 | 0,151396301 | 0,18  | 0,884247878 |
| Ccdc142os | 0,19  | 0,690305869 | -0,04 | 0,953198116 | -0,11 | 0,86459621  | -0,13 | 0,848930763 | 0,32  | 0,6754671   |
| Ccdc144b  | 0,21  | 0,691222142 | 0,12  | 0,802440628 | -0,08 | 0,917108186 | -0,3  | 0,373166026 | -0,36 | 0,583882299 |
| Ccdc146   | -0,08 | 0,883130741 | -0,09 | 0,928402591 | -0,06 | 0,937659487 | 0,36  | 0,447104269 | -0,08 | 0,939930189 |
| Ccdc148   | 0,13  | 0,791150064 | 0,26  | 0,702406882 | -0,28 | 0,597209032 | 0,21  | 0,779547737 | 0,03  | 0,981452448 |
| Ccdc149   | 0,05  | 0,971590029 | 0,25  | 0,793476974 | -0,62 | 0,446493846 | 0,32  | 0,615246275 | -0,2  | 0,815693459 |
| Ccdc15    | -0,36 | 0,465700041 | -0,3  | 0,812664394 | 0,68  | 0,375329939 | -0,14 | 0,718378323 | -0,62 | 0,421255613 |
| Ccdc150   | -0,04 | 0,97382475  | 0,19  | 0,824372931 | -0,32 | 0,713620433 | -0,11 | 0,789705234 | 0,3   | 0,551563576 |
| Ccdc151   | 0,14  | 0,828090765 | -0,27 | 0,761404909 | -0,13 | 0,830336321 | 0,23  | 0,663121129 | -0,08 | 0,936834819 |
| Ccdc152   | -0,31 | 0,54401985  | 0,27  | 0,658998976 | -0,25 | 0,599202081 | 0,27  | 0,666880163 | -0,16 | 0,936834819 |
| Ccdc153   | 0,23  | 0,549437855 | -0,23 | 0,84536438  | 0,06  | 0,944441051 | 0,28  | 0,654510601 | -0,11 | 0,910301996 |
| Ccdc154   | 0,32  | 0,474293292 | 0,4   | 0,531187764 | -0,49 | 0,423586474 | -0,39 | 0,428855564 | -0,18 | 0,89160598  |
| Ccdc155   | -0,02 | 0,978853388 | -0,19 | 0,790939978 | 0,35  | 0,571082984 | 0,27  | 0,557149783 | 0,25  | 0,723883531 |
| Ccdc157   | -0,26 | 0,741815678 | 0,06  | 0,937914967 | -0,05 | 0,973732268 | -0,97 | 0,285133875 | -0,16 | 0,909363599 |
| Ccdc158   | 0,16  | 0,833922235 | -0,42 | 0,677128722 | -0,47 | 0,454399654 | 0,54  | 0,362132663 | 0,2   | 0,885872093 |
| Ccdc159   | -0,04 | 0,976314749 | -0,02 | 0,99460836  | 0,12  | 0,899609928 | -0,8  | 0,253467469 | -0,55 | 0,456450979 |
| Ccdc160   | 0,19  | 0,790008568 | -0,16 | 0,808222835 | -0,39 | 0,569687965 | -0,71 | 0,261816854 | -0,12 | 0,939248399 |
| Ccdc162   | 0,04  | 0,948926586 | -0,22 | 0,785543886 | -0,34 | 0,564193137 | 0,1   | 0,871175376 | -0,01 | 0,991437885 |
| Ccdc163   | 0,21  | 0,724976228 | 0,31  | 0,565639972 | -0,42 | 0,655462574 | -0,55 | 0,460670396 | -0,19 | 0,887719506 |
| Ccdc166   | -0,25 | 0,625573018 | 0,07  | 0,92941827  | -0,05 | 0,95136091  | -0,37 | 0,339858865 | -0,21 | 0,771954227 |
| Ccdc167   | -0,36 | 0,466373218 | 0,07  | 0,908395059 | 0,24  | 0,736196104 | -0,17 | 0,807489629 | -0,12 | 0,895579031 |
| Ccdc168   | -0,1  | 0,814888638 | 0,06  | 0,897840727 | -0,12 | 0,823823322 | -0,2  | 0,651601597 | 0,13  | 0,894192218 |
| Ccdc169   | 0,25  | 0,619127292 | 0,24  | 0,717355605 | -0,27 | 0,543309542 | 0,15  | 0,845617958 | 0,17  | 0,845142293 |
| Ccdc17    | 0,33  | 0,828767158 | 0,27  | 0,674643073 | -0,36 | 0,743213252 | -0,28 | 0,702534189 | -0,23 | 0,776907684 |
| Ccdc170   | 0,32  | 0,760506765 | 0,07  | 0,949561659 | -0,02 | 0,988661889 | -0,23 | 0,71163536  | 0,04  | 0,973428839 |
| Ccdc171   | 0,33  | 0,661993372 | 0,3   | 0,804394095 | -0,87 | 0,209534486 | -0,72 | 0,296127415 | -0,53 | 0,574516113 |
| Ccdc172   | -0,05 | 0,933912196 | -0,1  | 0,896187678 | 0,24  | 0,726539408 | 0,06  | 0,920791334 | 0,18  | 0,776169957 |
| Ccdc173   | -0,26 | 0,739833092 | -0,15 | 0,88741189  | -0,56 | 0,294163114 | 0,14  | 0,87148686  | 0,15  | 0,912733818 |
| Ccdc174   | 0,16  | 0,687472607 | -0,16 | 0,818871477 | 0,44  | 0,402779579 | -0,37 | 0,497490252 | 0,11  | 0,906876904 |
| Ccdc175   | -0,32 | 0,477363665 | 0,09  | 0,887752277 | -0,18 | 0,816934675 | 0,04  | 0,952800885 | 0,22  | 0,739121045 |
| Ccdc177   | 0,09  | 0,914090929 | -0,02 | 0,976014625 | -0,19 | 0,737241227 | -0,24 | 0,507630384 | 0     | 0,99981982  |
| Ccdc178   | 0,25  | 0,673291416 | -0,15 | 0,77148563  | -0,26 | 0,736401647 | 0,28  | 0,688152796 | 0,35  | 0,643580968 |

|          |       |             |       |             |       |             |       |             |       |             |
|----------|-------|-------------|-------|-------------|-------|-------------|-------|-------------|-------|-------------|
| Ccdc18   | -0,11 | 0,802553493 | 0,49  | 0,406140322 | 0,56  | 0,483761569 | 0,45  | 0,243802669 | 0,4   | 0,541844974 |
| Ccdc180  | 0,24  | 0,822676888 | -0,31 | 0,668839557 | -0,47 | 0,321143299 | 0,36  | 0,535597404 | -0,33 | 0,640223591 |
| Ccdc181  | 0,5   | 0,398861055 | 0,65  | 0,666450149 | -0,53 | 0,36356264  | -0,5  | 0,486817461 | -0,16 | 0,808847897 |
| Ccdc182  | 0,13  | 0,810101389 | 0,27  | 0,695689103 | 0,06  | 0,95295976  | 0,11  | 0,75983637  | 0,08  | 0,92741476  |
| Ccdc183  | 0,01  | 0,992533909 | 0,2   | 0,884132993 | -0,39 | 0,507095234 | -0,14 | 0,883051226 | 0,05  | 0,965421285 |
| Ccdc184  | -0,35 | 0,546449654 | -0,55 | 0,587634717 | 0,09  | 0,933384842 | 0,63  | 0,308923754 | -0,21 | 0,796146369 |
| Ccdc185  | -0,1  | 0,808947569 | 0,02  | 0,974159037 | -0,11 | 0,853753298 | -0,15 | 0,783119247 | 0     | 0,996614425 |
| Ccdc186  | -0,11 | 0,858748956 | 0,08  | 0,928134372 | 0,48  | 0,369457035 | 0,37  | 0,522511755 | -0,01 | 0,994637097 |
| Ccdc187  | -0,05 | 0,946792769 | 0,23  | 0,764886087 | 0,33  | 0,663029337 | 0,04  | 0,967866794 | 0,1   | 0,89529118  |
| Ccdc189  | 0,21  | 0,724502628 | 0,12  | 0,877934765 | 0,33  | 0,598063616 | -0,66 | 0,490865019 | -0,51 | 0,638212808 |
| Ccdc190  | -0,08 | 0,865055523 | 0,27  | 0,745130453 | -0,18 | 0,813110365 | 0,2   | 0,739921734 | 0,12  | 0,875713596 |
| Ccdc191  | -0,44 | 0,565115288 | 0,37  | 0,802755902 | -0,12 | 0,864598204 | -0,93 | 0,270537099 | -0,02 | 0,98932552  |
| Ccdc22   | 0,29  | 0,669841006 | 0,16  | 0,796382388 | 0,59  | 0,137294006 | 0,31  | 0,543079385 | 0,44  | 0,45660227  |
| Ccdc24   | -0,17 | 0,786709661 | -0,09 | 0,928134372 | 0,42  | 0,57717258  | 0,4   | 0,564310322 | -0,07 | 0,956610289 |
| Ccdc25   | 0,71  | 0,189644465 | 0,78  | 0,20689584  | -0,42 | 0,621644149 | 0,12  | 0,79009147  | 1,01  | 0,060986193 |
| Ccdc27   | -0,07 | 0,9230183   | -0,31 | 0,640846988 | -0,07 | 0,923396625 | 0,3   | 0,432881311 | 0,18  | 0,823098095 |
| Ccdc28a  | 0,62  | 0,236802372 | 0,33  | 0,426168855 | -0,42 | 0,666575428 | -0,44 | 0,597332937 | 0,12  | 0,946463658 |
| Ccdc28b  | -0,27 | 0,655623232 | -0,15 | 0,766425161 | 0,26  | 0,645611751 | -0,13 | 0,777533468 | -0,34 | 0,570730838 |
| Ccdc3    | -0,12 | 0,831744184 | 0,26  | 0,7091547   | 0,17  | 0,879319538 | -1,07 | 0,045997065 | -0,46 | 0,592460098 |
| Ccdc30   | 0,23  | 0,789239093 | -0,25 | 0,532284649 | -0,24 | 0,744336237 | 0,21  | 0,716752012 | 0,05  | 0,969617491 |
| Ccdc32   | -0,35 | 0,563164645 | 0,04  | 0,968528535 | 0,37  | 0,628048897 | -0,33 | 0,502823627 | -0,29 | 0,674408371 |
| Ccdc33   | -0,13 | 0,9174562   | 0,06  | 0,94892312  | 0,52  | 0,570764191 | 0,42  | 0,534212686 | 0,49  | 0,538864694 |
| Ccdc34   | -0,28 | 0,561068529 | -1,02 | 0,277253387 | 0,87  | 0,140524712 | 1     | 0,231444017 | -0,28 | 0,739804907 |
| Ccdc34os | -0,14 | 0,944291635 | 0,29  | 0,782652703 | -0,16 | 0,814661255 | -0,35 | 0,529804709 | 0,33  | 0,654545258 |
| Ccdc36   | -0,31 | 0,665609782 | -0,25 | 0,785244931 | -0,19 | 0,801755243 | 0,36  | 0,342672804 | -0,26 | 0,68987325  |
| Ccdc38   | 0,11  | 0,891798972 | -0,08 | 0,926353869 | -0,5  | 0,366540243 | 0,22  | 0,588844463 | 0,31  | 0,567590783 |
| Ccdc39   | 0,14  | 0,867025523 | 0,62  | 0,693906911 | -1,17 | 0,112229182 | -0,11 | 0,920640884 | 0,55  | 0,395349481 |
| Ccdc40   | 0,14  | 0,843836953 | 0,32  | 0,576723643 | -0,44 | 0,477258573 | 0,11  | 0,931250259 | -0,07 | 0,97425848  |
| Ccdc42   | 0,01  | 0,996998625 | -0,64 | 0,474106654 | -0,09 | 0,930193129 | 0,61  | 0,212666842 | -0,08 | 0,934636927 |
| Ccdc42os | 0,1   | 0,878405951 | -0,08 | 0,858935338 | -0,14 | 0,812149399 | 0,09  | 0,860201004 | -0,03 | 0,97425848  |
| Ccdc43   | 0,02  | 0,98659811  | -0,11 | 0,859954464 | 0,14  | 0,886000685 | 0,59  | 0,236937742 | -0,05 | 0,957130917 |
| Ccdc47   | -0,39 | 0,562802786 | 0,11  | 0,904258936 | 0,04  | 0,977306521 | -0,26 | 0,637969052 | -0,07 | 0,937558003 |
| Ccdc50   | 0,03  | 0,956452501 | 0,13  | 0,792112243 | -0,03 | 0,978207511 | 0,22  | 0,675727528 | 0,45  | 0,438444904 |
| Ccdc51   | -0,18 | 0,698332739 | -0,08 | 0,918400751 | 0,31  | 0,527689832 | 0,12  | 0,803756713 | -0,26 | 0,606745732 |
| Ccdc53   | 0,04  | 0,975108898 | 0,05  | 0,943915456 | -0,28 | 0,805783058 | 0,12  | 0,741452902 | -0,36 | 0,642152163 |

|         |       |             |       |             |       |             |       |             |       |             |
|---------|-------|-------------|-------|-------------|-------|-------------|-------|-------------|-------|-------------|
| Ccdc54  | 0,1   | 0,873124291 | -0,3  | 0,602956592 | 0,05  | 0,953086812 | 0,2   | 0,669326407 | 0,05  | 0,956610289 |
| Ccdc57  | -0,09 | 0,909885273 | -0,14 | 0,912137323 | -0,28 | 0,656407323 | 0,01  | 0,990985697 | -0,44 | 0,40189401  |
| Ccdc58  | -0,1  | 0,814881268 | 0,28  | 0,85141132  | -0,24 | 0,727913388 | 0,56  | 0,624174584 | -1,01 | 0,306747854 |
| Ccdc59  | 0,36  | 0,559644874 | 0,15  | 0,830864229 | -0,07 | 0,944078985 | 0,08  | 0,907485612 | 0,25  | 0,726639603 |
| Ccdc6   | 0,05  | 0,948087131 | -0,1  | 0,8910846   | -0,11 | 0,895782914 | 0,96  | 0,034713293 | 0,46  | 0,393448838 |
| Ccdc60  | 0,04  | 0,969577981 | -0,25 | 0,831404974 | -0,23 | 0,777810365 | 0,27  | 0,701167068 | -0,1  | 0,894192218 |
| Ccdc61  | -0,33 | 0,529398718 | 0,3   | 0,472137499 | 0,03  | 0,980056794 | -0,94 | 0,125049928 | -0,88 | 0,200646302 |
| Ccdc62  | 0,14  | 0,84357861  | 0,11  | 0,938233008 | 0,5   | 0,41090242  | -0,7  | 0,284374871 | 0,29  | 0,805354959 |
| Ccdc63  | 0,13  | 0,847070804 | 0,4   | 0,470112519 | 0,1   | 0,885042765 | -0,64 | 0,234277327 | 0,33  | 0,618748455 |
| Ccdc64  | 0     | 0,996998625 | -0,08 | 0,924525687 | 0,04  | 0,973998536 | -0,08 | 0,87048472  | -0,05 | 0,960313057 |
| Ccdc64b | 0,11  | 0,892176461 | 0,06  | 0,949299949 | -0,05 | 0,940543595 | 0,53  | 0,234249123 | 0,68  | 0,268285808 |
| Ccdc65  | 0,18  | 0,791517531 | -0,07 | 0,919934184 | -0,27 | 0,616398569 | 0,18  | 0,676010477 | -0,06 | 0,949032619 |
| Ccdc66  | -0,05 | 0,963914207 | -0,05 | 0,954307545 | 1,1   | 0,215429632 | 0,01  | 0,994376209 | -0,1  | 0,942469511 |
| Ccdc67  | -0,43 | 0,62085984  | 0,45  | 0,641792237 | -0,73 | 0,436827113 | -0,56 | 0,55652987  | 0,34  | 0,712793529 |
| Ccdc68  | -0,14 | 0,892974912 | 0,54  | 0,724572503 | 0,72  | 0,396489851 | -1,12 | 0,203580306 | -0,17 | 0,925858284 |
| Ccdc69  | 0,27  | 0,692118638 | 0,34  | 0,840277028 | -0,24 | 0,829285065 | -0,86 | 0,427615276 | 0,29  | 0,859981939 |
| Ccdc70  | 0     | 0,999536558 | 0,29  | 0,664608337 | -0,18 | 0,769906159 | 0,15  | 0,764855242 | -0,2  | 0,765809384 |
| Ccdc71  | -0,02 | 0,988414371 | -0,31 | 0,716661568 | 0,4   | 0,591404136 | -0,78 | 0,061758118 | -0,45 | 0,362980572 |
| Ccdc71l | 0,23  | 0,606922012 | 0,55  | 0,232378975 | 0,1   | 0,941561196 | 0,02  | 0,972584224 | 0,37  | 0,518944192 |
| Ccdc73  | -0,39 | 0,494884125 | 0,43  | 0,501917143 | -0,25 | 0,716894796 | -0,16 | 0,741739891 | 0,33  | 0,600622169 |
| Ccdc74a | -0,19 | 0,837953479 | 0,25  | 0,836652188 | -0,35 | 0,727262258 | -0,36 | 0,536344767 | -0,51 | 0,387227244 |
| Ccdc77  | -0,22 | 0,785012364 | -0,18 | 0,88325516  | 0,6   | 0,216719297 | 0,34  | 0,66382297  | 0,02  | 0,983494749 |
| Ccdc78  | -0,56 | 0,329339382 | 0,49  | 0,428093777 | 0,37  | 0,713122331 | -0,12 | 0,826933755 | -0,39 | 0,587199571 |
| Ccdc79  | 0,2   | 0,746728273 | -0,17 | 0,867512619 | -0,09 | 0,935887545 | 0,16  | 0,846838617 | 0,29  | 0,677687906 |
| Ccdc7a  | -0,06 | 0,963457823 | -0,44 | 0,244522943 | -0,38 | 0,530318769 | 0,14  | 0,858877782 | 0,55  | 0,677687906 |
| Ccdc7b  | 0,1   | 0,923180948 | -0,28 | 0,729172466 | -0,14 | 0,875089034 | 0,06  | 0,939298189 | 0,13  | 0,88288747  |
| Ccdc8   | -0,29 | 0,704720946 | 0,03  | 0,96446565  | -0,2  | 0,777210497 | -0,54 | 0,255585145 | -0,65 | 0,226304133 |
| Ccdc80  | 0,01  | 0,991919022 | 0,51  | 0,666450149 | -0,81 | 0,565622905 | -1,9  | 0,188915451 | 0,81  | 0,599124106 |
| Ccdc81  | -0,35 | 0,641357042 | 0,45  | 0,583200444 | -0,15 | 0,841669036 | -0,49 | 0,415022773 | 0,89  | 0,59389743  |
| Ccdc82  | 0,16  | 0,925510521 | 0,25  | 0,6416563   | 0,13  | 0,938771378 | -0,17 | 0,896599656 | 0,81  | 0,521841588 |
| Ccdc83  | 0,1   | 0,903666411 | -0,35 | 0,397155904 | 0,02  | 0,978012085 | 0,35  | 0,597708995 | 0,23  | 0,799292062 |
| Ccdc84  | 0,28  | 0,625629537 | 0,12  | 0,857624114 | 0,11  | 0,894018349 | -0,38 | 0,524015427 | 0,07  | 0,948835084 |
| Ccdc85a | 0,03  | 0,970463755 | -0,66 | 0,362448332 | 0,63  | 0,427338848 | -0,72 | 0,290356562 | -1,05 | 0,080808405 |
| Ccdc85b | -0,5  | 0,362194539 | -0,3  | 0,624511355 | -0,02 | 0,986912078 | 0,13  | 0,744726132 | -0,16 | 0,790216934 |
| Ccdc85c | -0,51 | 0,515770167 | -0,35 | 0,718431206 | 0,62  | 0,503729732 | 0,41  | 0,588445475 | 0,01  | 0,990091016 |

|         |       |             |       |             |       |             |       |             |       |             |
|---------|-------|-------------|-------|-------------|-------|-------------|-------|-------------|-------|-------------|
| Ccdc86  | -0,62 | 0,708296676 | 0,43  | 0,493580894 | -0,85 | 0,377624172 | -0,2  | 0,859774478 | 0,3   | 0,755982506 |
| Ccdc87  | -0,25 | 0,696379019 | 0     | 1           | -0,17 | 0,743653977 | 0,07  | 0,902636185 | -0,3  | 0,636598087 |
| Ccdc88a | -0,15 | 0,831656655 | -0,26 | 0,756584634 | 0,57  | 0,215429632 | 0,72  | 0,246085743 | 0,3   | 0,704792436 |
| Ccdc88b | -0,14 | 0,848783415 | 0,14  | 0,836404534 | 0,1   | 0,877127326 | -0,47 | 0,321536477 | -0,1  | 0,902802615 |
| Ccdc88c | -0,65 | 0,256112056 | -0,35 | 0,392755621 | 0,44  | 0,487541119 | 0,58  | 0,145215692 | -0,45 | 0,409091862 |
| Ccdc89  | -0,13 | 0,844688163 | 0,11  | 0,858860016 | -0,16 | 0,865545635 | 0,05  | 0,908141892 | 0,34  | 0,777307101 |
| Ccdc9   | -0,26 | 0,636434557 | 0,28  | 0,536246395 | -0,06 | 0,953345773 | -0,55 | 0,15782952  | 0,07  | 0,939448119 |
| Ccdc90b | -0,11 | 0,907748757 | -0,12 | 0,810418074 | 0,44  | 0,514610288 | -0,06 | 0,922338609 | 0,07  | 0,937558003 |
| Ccdc91  | 0,1   | 0,943576038 | -0,04 | 0,974819792 | -0,54 | 0,683917899 | -0,38 | 0,573379312 | 0,15  | 0,85806566  |
| Ccdc92  | -0,04 | 0,94881239  | -0,39 | 0,717074519 | -0,35 | 0,636233777 | 0,41  | 0,68047104  | 0,35  | 0,754537045 |
| Ccdc92b | -0,1  | 0,909529233 | -0,01 | 0,997700959 | -0,48 | 0,607104866 | 0,12  | 0,857884225 | -0,14 | 0,892547331 |
| Ccdc93  | 0,33  | 0,619738681 | 0,18  | 0,82505545  | -0,13 | 0,887630371 | -0,02 | 0,987977078 | -0,32 | 0,713599145 |
| Ccdc94  | -0,35 | 0,496123406 | -0,21 | 0,841007084 | 0,16  | 0,845499357 | 0,05  | 0,897924427 | 0,1   | 0,909555782 |
| Ccdc96  | -0,4  | 0,640236418 | -0,45 | 0,569562625 | 0,07  | 0,926365431 | 0,39  | 0,609597987 | 0,76  | 0,332430866 |
| Ccdc97  | -0,22 | 0,808379727 | -0,15 | 0,725904452 | -0,32 | 0,685933617 | 0,31  | 0,378422508 | 0,12  | 0,9039404   |
| Ccer1   | 0,27  | 0,597519827 | 0,04  | 0,935329426 | -0,37 | 0,580049353 | 0,08  | 0,889401797 | 0,24  | 0,734042268 |
| Ccer2   | -0,02 | 0,975341177 | 0,02  | 0,993221425 | -0,11 | 0,905632058 | -0,16 | 0,856710718 | 0,18  | 0,84597948  |
| Cchcr1  | -0,3  | 0,658350988 | -0,12 | 0,921778312 | 0,43  | 0,36401558  | 0,58  | 0,378056559 | -0,33 | 0,594109073 |
| Ccin    | 0,61  | 0,38838066  | 0,36  | 0,375973804 | -0,43 | 0,554357477 | 0,11  | 0,890879327 | -0,28 | 0,838679773 |
| Cck     | 0,28  | 0,581866911 | -0,35 | 0,399034054 | 0,15  | 0,830300038 | -0,09 | 0,887937123 | 0,3   | 0,728530603 |
| Cckar   | 0,22  | 0,82079172  | 0,11  | 0,941258271 | -0,4  | 0,61483831  | -0,18 | 0,741943198 | 0,19  | 0,791071778 |
| Cckbr   | -0,23 | 0,833900133 | -0,06 | 0,926134516 | -0,11 | 0,902672106 | 0,28  | 0,588844463 | 0,22  | 0,705981778 |
| Ccl1    | -0,01 | 0,98456417  | -0,24 | 0,758114521 | -0,35 | 0,501053983 | 0,1   | 0,868278978 | 0,52  | 0,374439274 |
| Ccl11   | 0,44  | 0,632053719 | 0,16  | 0,728434379 | -0,83 | 0,37686469  | -0,61 | 0,389287255 | -0,68 | 0,47795422  |
| Ccl12   | -0,05 | 0,975506993 | -0,1  | 0,930983876 | 0,14  | 0,836670085 | 0,18  | 0,677607825 | 0,07  | 0,927238751 |
| Ccl17   | 0,35  | 0,436086286 | 0,32  | 0,494858163 | 0,31  | 0,622546805 | -0,11 | 0,787615739 | 0,36  | 0,681597394 |
| Ccl19   | 0,22  | 0,626552209 | 0     | 0,999438768 | -1,17 | 0,016964496 | -0,09 | 0,874701048 | 0,08  | 0,91314596  |
| Ccl2    | -0,53 | 0,470455626 | -0,39 | 0,683632754 | 0,62  | 0,200940485 | 1,63  | 0,090453512 | 0,64  | 0,530763007 |
| Ccl20   | 0,18  | 0,816465857 | 0,47  | 0,594415097 | -0,19 | 0,933464359 | -0,12 | 0,8623545   | -0,26 | 0,724766638 |
| Ccl22   | 0,11  | 0,888623724 | 0,03  | 0,994486533 | -0,07 | 0,929871006 | -0,18 | 0,814570338 | -0,57 | 0,513982313 |
| Ccl24   | 0,06  | 0,944291635 | 0,45  | 0,614530823 | -0,05 | 0,971885204 | -0,21 | 0,813711032 | 0,21  | 0,845218636 |
| Ccl25   | 1,09  | 0,234062181 | 0,42  | 0,769674091 | 0,46  | 0,721369858 | 0,16  | 0,847194434 | 0,67  | 0,419557334 |
| Ccl26   | 0,22  | 0,619165619 | -0,12 | 0,807674009 | -0,14 | 0,911894304 | 0,38  | 0,464318877 | -0,14 | 0,893737959 |
| Ccl27a  | 0     | 0,998927419 | 0,44  | 0,494859861 | -0,09 | 0,904057901 | -0,15 | 0,799360957 | 0,21  | 0,765809384 |
| Ccl28   | -0,42 | 0,591628257 | 0,15  | 0,811472247 | 0,1   | 0,928438649 | -0,05 | 0,943143586 | -0,15 | 0,924811486 |

|          |       |             |       |             |       |             |       |             |       |             |
|----------|-------|-------------|-------|-------------|-------|-------------|-------|-------------|-------|-------------|
| Ccl3     | -0,2  | 0,801665973 | 0,78  | 0,322591012 | 0,63  | 0,867571963 | -0,23 | 0,662467153 | -0,22 | 0,700875396 |
| Ccl4     | -0,27 | 0,735799425 | 0,13  | 0,811014932 | -0,04 | 0,985347628 | 0,14  | 0,763633244 | 0,25  | 0,764823789 |
| Ccl5     | 1,11  | 0,097625832 | 0,46  | 0,629493333 | -0,65 | 0,215153182 | 0     | 1           | 0,68  | 0,24120873  |
| Ccl6     | 0,19  | 0,81630789  | -0,54 | 0,459417799 | 0,62  | 0,71593256  | 0,42  | 0,515329684 | -0,37 | 0,61355523  |
| Ccl7     | 0,34  | 0,61006769  | -0,18 | 0,73623784  | 0,4   | 0,695705149 | 0,08  | 0,943143586 | -0,43 | 0,673120647 |
| Ccl8     | 0,22  | 0,704720946 | -1,11 | 0,647569143 | 0,3   | 0,908400411 | 3,35  | 0,004876398 | 0,38  | 0,596092228 |
| Ccl9     | 0,5   | 0,38910431  | 0,07  | 0,939289739 | 0,79  | 0,330054927 | 0,48  | 0,406187448 | 0,29  | 0,679778012 |
| Ccm2     | -0,11 | 0,842562602 | -0,14 | 0,818613446 | 0,63  | 0,224747376 | 0,38  | 0,626786547 | -0,07 | 0,954657649 |
| Ccm2l    | -0,5  | 0,430723846 | -0,47 | 0,438764825 | -0,05 | 0,949553487 | -0,96 | 0,057435078 | -0,49 | 0,439549311 |
| Ccna1    | 0,42  | 0,404319947 | 0,31  | 0,607281028 | -0,19 | 0,766359141 | -0,16 | 0,78925905  | 0,16  | 0,86229485  |
| Ccna2    | -1,16 | 0,268112899 | -1,47 | 0,271257402 | 0,9   | 0,278260113 | 2,65  | 0,0215358   | -0,87 | 0,236342423 |
| Ccnb1    | -1,98 | 0,074890017 | -2,44 | 0,104971247 | 1,6   | 0,069140783 | 3,94  | 0,02448836  | 0,38  | 0,559999554 |
| Ccnb1ip1 | 0,21  | 0,762165257 | -0,01 | 0,996193845 | 0,02  | 0,974628464 | 0,46  | 0,313562807 | 0,18  | 0,840952901 |
| Ccnb2    | -1,57 | 0,085471154 | -1,28 | 0,210141501 | 1,88  | 0,12691088  | 2,84  | 0,008743376 | -0,86 | 0,145814706 |
| Ccnb3    | 0,21  | 0,79544188  | 0,44  | 0,583200444 | 0,13  | 0,880706627 | -0,51 | 0,144438245 | -0,18 | 0,779762583 |
| Ccnc     | -0,17 | 0,669220209 | 0,4   | 0,554040231 | 0,91  | 0,453294355 | 0,35  | 0,507630384 | 0,7   | 0,257578021 |
| Ccnd1    | -0,65 | 0,135196133 | -0,39 | 0,336330453 | 0,07  | 0,963221639 | 1,04  | 0,023573716 | 0,15  | 0,860591136 |
| Ccnd2    | -0,67 | 0,546019769 | -0,42 | 0,472042875 | -0,39 | 0,737821076 | -3,2  | 0,003009221 | 0,13  | 0,837443824 |
| Ccnd3    | 0,39  | 0,485159825 | -0,21 | 0,802615172 | -0,16 | 0,821961435 | -0,3  | 0,531456449 | -0,53 | 0,32673984  |
| Ccndbp1  | -0,18 | 0,771549051 | 0,38  | 0,738762579 | -0,31 | 0,684455958 | -0,96 | 0,381888505 | -0,33 | 0,872104386 |
| Ccne1    | -0,4  | 0,655006949 | -0,22 | 0,868234125 | -0,32 | 0,751319051 | 1,39  | 0,018656064 | 0,83  | 0,277185147 |
| Ccne2    | -0,44 | 0,648730873 | -1,99 | 0,214378713 | 0,75  | 0,383732583 | 2,79  | 0,028363085 | 0,26  | 0,828679046 |
| Ccnf     | -0,96 | 0,148272667 | -1,67 | 0,143690114 | 0,73  | 0,179552168 | 2,52  | 0,007919254 | 0,08  | 0,913414593 |
| Ccng1    | -0,06 | 0,915547728 | -0,17 | 0,825203842 | 0,64  | 0,680612866 | 0,38  | 0,408787021 | -0,05 | 0,95587699  |
| Ccng2    | 0,51  | 0,234129035 | 0,24  | 0,631728257 | 0,49  | 0,697890099 | 0,69  | 0,118595192 | 0,16  | 0,836061657 |
| Ccnh     | -0,51 | 0,480319644 | -0,39 | 0,545116169 | 0,88  | 0,187549795 | 0,09  | 0,893255574 | 0,06  | 0,952190189 |
| Ccni     | -0,65 | 0,333351712 | -0,3  | 0,732044571 | -0,17 | 0,837156771 | 1,54  | 0,171856639 | 0,29  | 0,871038748 |
| Ccnj     | -0,11 | 0,892124736 | -0,01 | 0,99804971  | 0,03  | 0,987007223 | 0,66  | 0,247809227 | 0,21  | 0,875421436 |
| Ccnjl    | -0,29 | 0,712165686 | -0,21 | 0,643743213 | -0,08 | 0,941254389 | -0,06 | 0,960547981 | -0,88 | 0,20482955  |
| Ccnk     | -0,03 | 0,966287119 | 0,34  | 0,368799475 | -0,04 | 0,978207511 | 0,13  | 0,721611115 | -0,02 | 0,985269236 |
| Ccnl1    | 0,07  | 0,893137556 | 0,3   | 0,670629152 | -0,13 | 0,861307315 | -0,27 | 0,639765346 | 0,53  | 0,316401979 |
| Ccnl2    | 0,36  | 0,598075174 | 0,2   | 0,664710351 | -0,37 | 0,56948206  | 0,11  | 0,859466831 | 0,55  | 0,42051872  |
| Ccno     | 0,23  | 0,707502054 | 0,11  | 0,949201983 | -0,31 | 0,663029337 | -1,04 | 0,298021209 | 0,44  | 0,602853136 |
| Ccnt1    | -0,01 | 0,995150704 | -0,04 | 0,954443581 | -0,13 | 0,883397468 | 0     | 1           | -0,07 | 0,96439553  |
| Ccnt2    | 0,25  | 0,670542104 | 0,39  | 0,612645853 | -0,18 | 0,751090942 | -0,25 | 0,486817461 | -0,01 | 0,992370267 |



|         |       |             |       |             |       |             |       |             |       |             |
|---------|-------|-------------|-------|-------------|-------|-------------|-------|-------------|-------|-------------|
| Ccny    | -0,34 | 0,687662951 | -0,53 | 0,535317887 | -0,35 | 0,720728089 | -0,1  | 0,815929282 | -0,31 | 0,647876293 |
| Ccnyl1  | 0,03  | 0,966775766 | -0,03 | 0,984142489 | -0,52 | 0,550662565 | -0,67 | 0,17731366  | 0,38  | 0,535117422 |
| Ccp110  | 0,07  | 0,944722622 | 0,07  | 0,959209847 | 1,13  | 0,35853328  | -0,05 | 0,949669541 | -0,59 | 0,604249799 |
| Ccpg1   | -0,17 | 0,777335496 | 0,36  | 0,420485441 | 0,72  | 0,238428106 | -1,4  | 0,048368852 | -0,13 | 0,89204841  |
| Ccpg1os | 0,56  | 0,472993837 | 0,08  | 0,883843639 | 1,39  | 0,156156107 | 0,01  | 0,996714438 | -0,22 | 0,884248437 |
| Ccr1    | 0,01  | 0,991919022 | 0,11  | 0,785573503 | 0     | 0,99879674  | -0,06 | 0,914931176 | -0,08 | 0,951223734 |
| Ccr10   | 0,24  | 0,628548235 | -0,02 | 0,983910551 | -0,19 | 0,802795561 | 0,19  | 0,708430738 | -0,11 | 0,912250982 |
| Ccr11   | -0,04 | 0,964976202 | -0,27 | 0,544380607 | -0,13 | 0,830328346 | 0,11  | 0,802512324 | -0,26 | 0,681542126 |
| Ccr2    | 0,3   | 0,757032046 | 0,03  | 0,991289424 | -0,37 | 0,661089127 | -0,16 | 0,893641164 | 0,16  | 0,904830156 |
| Ccr3    | 0,14  | 0,839824168 | -0,03 | 0,983363427 | 0,01  | 0,991477426 | -0,18 | 0,755234779 | 0,04  | 0,975986697 |
| Ccr4    | 0,09  | 0,832513798 | -0,16 | 0,904250818 | 0,37  | 0,546286708 | 0,4   | 0,649891314 | -0,4  | 0,626176831 |
| Ccr5    | 0,43  | 0,489008935 | 0,13  | 0,921036877 | 0,29  | 0,759636126 | 0,47  | 0,563779179 | 0,06  | 0,963903981 |
| Ccr6    | 0,5   | 0,616460255 | -0,29 | 0,706671369 | -0,15 | 0,846795397 | 0,53  | 0,200972441 | 0     | 0,996891855 |
| Ccr7    | 0,25  | 0,822107047 | 0,26  | 0,598307698 | 0,23  | 0,864598204 | 0,05  | 0,945195883 | -0,18 | 0,825564898 |
| Ccr8    | -0,18 | 0,76050225  | -0,05 | 0,952878559 | -0,14 | 0,791390652 | 0,06  | 0,932800758 | -0,01 | 0,990633766 |
| Ccr9    | -0,36 | 0,469692532 | -0,08 | 0,966717367 | 0,06  | 0,949565553 | 0,4   | 0,321953491 | 0,31  | 0,702558142 |
| Ccr12   | 1,81  | 0,079254645 | 1,85  | 0,104392193 | -1,48 | 0,183788478 | -0,78 | 0,221786246 | 0,79  | 0,202369779 |
| Ccs     | -0,51 | 0,420241977 | 0,18  | 0,781665479 | 0,36  | 0,654276436 | -0,19 | 0,578729685 | -0,4  | 0,395115041 |
| Ccsap   | -0,53 | 0,318041432 | -0,22 | 0,77148563  | 0,25  | 0,750624323 | -0,03 | 0,963024916 | -0,4  | 0,493919589 |
| Ccser1  | 0,19  | 0,810202145 | 0,2   | 0,702568161 | 0,67  | 0,70635953  | 1,63  | 0,009334604 | 0,03  | 0,976743304 |
| Ccser2  | 0,1   | 0,849091528 | 0,1   | 0,875032856 | -0,29 | 0,591404136 | 0,28  | 0,393249674 | 0,32  | 0,515067033 |
| Cct2    | -0,42 | 0,316599006 | -0,19 | 0,75247655  | 0,38  | 0,571405665 | 0,82  | 0,070668962 | 0,2   | 0,750167943 |
| Cct3    | -0,17 | 0,758067417 | 0,11  | 0,894571363 | -0,04 | 0,962724714 | 0,77  | 0,225136935 | 0,61  | 0,392307608 |
| Cct4    | -0,28 | 0,679958649 | 0,01  | 0,990251808 | 0,52  | 0,471873683 | 0,65  | 0,417252401 | 0,56  | 0,573405587 |
| Cct5    | -0,46 | 0,259747394 | -0,37 | 0,361859121 | 0,17  | 0,817780561 | 0,98  | 0,067770937 | 0,12  | 0,880656145 |
| Cct6a   | -0,37 | 0,437499565 | -0,37 | 0,619501651 | 0,47  | 0,533023142 | 0,94  | 0,033226903 | 0,2   | 0,73296097  |
| Cct6b   | -0,01 | 0,995106813 | -0,08 | 0,93163271  | -0,14 | 0,8128837   | 0,29  | 0,515329684 | -0,14 | 0,84701421  |
| Cct7    | -0,38 | 0,35419917  | -0,29 | 0,451994343 | 0,74  | 0,103030088 | 0,65  | 0,144190803 | 0,3   | 0,669861917 |
| Cct8    | -0,55 | 0,187868882 | -0,06 | 0,956849804 | 0,89  | 0,103030088 | 0,72  | 0,094011812 | 0,48  | 0,395499484 |
| Cct8l1  | -0,06 | 0,926031265 | 0,06  | 0,90251322  | -0,14 | 0,860524459 | 0,37  | 0,548190684 | 0,23  | 0,837975015 |
| Ccz1    | 0,18  | 0,679451519 | -0,03 | 0,961939203 | 0,32  | 0,72230278  | 0,41  | 0,337528553 | 0,19  | 0,811956957 |
| Cd101   | -0,15 | 0,821267687 | -0,17 | 0,824916914 | -0,17 | 0,856250136 | 0,16  | 0,768212763 | 0     | 0,998332822 |
| Cd109   | -0,86 | 0,244464172 | -0,77 | 0,107449087 | 1,67  | 0,036818657 | 1,8   | 0,023032845 | -0,32 | 0,704271976 |
| Cd14    | -0,07 | 0,96311249  | -1,27 | 0,142400999 | 1,05  | 0,267460228 | -0,38 | 0,756016224 | -0,18 | 0,924431292 |
| Cd151   | -0,03 | 0,955051648 | -0,02 | 0,9860901   | 0,38  | 0,462643491 | 0,02  | 0,962242439 | -0,08 | 0,926308401 |

|         |       |             |       |             |       |             |       |             |       |             |
|---------|-------|-------------|-------|-------------|-------|-------------|-------|-------------|-------|-------------|
| Cd160   | 0,24  | 0,778869381 | 0,15  | 0,921610565 | 0,1   | 0,895591227 | 0,52  | 0,480121746 | 0,17  | 0,88282824  |
| Cd163   | 0,22  | 0,744748605 | -0,22 | 0,794471335 | 0,1   | 0,903225211 | 0,15  | 0,87811903  | 0,25  | 0,791694696 |
| Cd16311 | -0,16 | 0,80501188  | 0,33  | 0,707838131 | -0,38 | 0,777417583 | -0,29 | 0,790111178 | -0,06 | 0,977780345 |
| Cd164   | 0,11  | 0,861941498 | -0,11 | 0,801259805 | 0,08  | 0,926365431 | 0,25  | 0,470051531 | -0,15 | 0,807725933 |
| Cd16412 | 0,37  | 0,458591721 | 0,25  | 0,593605226 | -0,16 | 0,866683512 | 0,21  | 0,68585056  | 0,03  | 0,979456872 |
| Cd177   | 0     | 0,998027251 | 0,13  | 0,799971382 | 0,31  | 0,660561609 | 0,16  | 0,781621482 | -0,05 | 0,962631948 |
| Cd180   | 0,18  | 0,841140165 | 0,1   | 0,938991098 | -0,01 | 0,993379272 | -0,34 | 0,534052725 | -0,51 | 0,606740281 |
| Cd19    | 0,03  | 0,98297164  | 0,13  | 0,789051952 | -0,23 | 0,706178361 | -0,04 | 0,95852873  | 0,17  | 0,868617727 |
| Cd1d1   | 0,17  | 0,903817676 | 0,03  | 0,985764487 | 0,58  | 0,339425194 | 0,22  | 0,900527585 | -0,79 | 0,694233384 |
| Cd1d2   | -0,24 | 0,854484314 | 0,58  | 0,824372931 | 0,22  | 0,779970041 | -0,52 | 0,283327727 | 0,07  | 0,953297732 |
| Cd2     | 0,04  | 0,964154899 | 0,14  | 0,910203909 | -0,57 | 0,205269759 | -0,51 | 0,289306673 | -0,17 | 0,828288883 |
| Cd200   | 0,59  | 0,157941498 | 0,36  | 0,385935063 | -0,94 | 0,036818657 | -0,41 | 0,328981532 | 0,05  | 0,953297732 |
| Cd200r1 | -0,07 | 0,918758168 | -0,25 | 0,817110093 | -0,23 | 0,659204194 | 0,16  | 0,815929282 | 0,15  | 0,830086988 |
| Cd200r2 | 0,15  | 0,844095084 | 0,07  | 0,981635653 | -0,35 | 0,617139025 | -0,45 | 0,753127323 | -0,38 | 0,76942924  |
| Cd200r3 | 0,08  | 0,926039561 | 0,32  | 0,666450149 | 0,22  | 0,757081718 | 0,2   | 0,760047111 | 0,15  | 0,844105751 |
| Cd200r4 | 0,68  | 0,593540946 | 0,15  | 0,883549685 | 0,31  | 0,804716642 | -0,23 | 0,707247444 | 0,29  | 0,724669859 |
| Cd207   | -0,13 | 0,799145501 | -0,15 | 0,808498635 | -0,04 | 0,973186233 | 0,25  | 0,429681877 | 0,05  | 0,953744167 |
| Cd209a  | 0,18  | 0,832513798 | -0,01 | 0,998513452 | -0,13 | 0,909717677 | 0,27  | 0,598657551 | 0,52  | 0,424134691 |
| Cd209b  | 0,11  | 0,864526424 | -0,2  | 0,863233628 | -0,2  | 0,688298291 | -0,13 | 0,758519001 | -0,51 | 0,351148522 |
| Cd209c  | 0,22  | 0,79498488  | 0,08  | 0,916213167 | -0,47 | 0,444017304 | -0,13 | 0,743156626 | 0,24  | 0,735152891 |
| Cd209d  | -0,03 | 0,970875252 | 0,14  | 0,863359785 | 0,08  | 0,939153693 | 0,46  | 0,527555735 | 0,19  | 0,860591136 |
| Cd209e  | -0,23 | 0,809957809 | -0,17 | 0,943915456 | -0,18 | 0,757042745 | 0,02  | 0,988205241 | -0,17 | 0,920803929 |
| Cd209f  | 0,18  | 0,859044359 | 0,01  | 0,999692079 | 0,43  | 0,530587266 | -0,26 | 0,789717483 | -0,66 | 0,340006862 |
| Cd209g  | -0,19 | 0,775326761 | -1,05 | 0,087315688 | 0     | 0,997220401 | 0,63  | 0,177828513 | 0,08  | 0,949751787 |
| Cd22    | 0,31  | 0,622541886 | -0,27 | 0,825662099 | 0,08  | 0,909233941 | 0,31  | 0,47083775  | -0,12 | 0,878683884 |
| Cd226   | -0,21 | 0,694699901 | 0,21  | 0,824372931 | 0,39  | 0,71593256  | -0,63 | 0,117805645 | -0,51 | 0,565817768 |
| Cd244   | -0,22 | 0,744446447 | -0,48 | 0,753679288 | -0,04 | 0,97268496  | 0,36  | 0,559278753 | 0,17  | 0,916173996 |
| Cd247   | 0,06  | 0,937187486 | -0,08 | 0,937377463 | -0,51 | 0,489556221 | -0,61 | 0,607900593 | -0,69 | 0,551971378 |
| Cd248   | -0,4  | 0,785491059 | 0,5   | 0,373642274 | 0,64  | 0,153783119 | 0,41  | 0,195542679 | -0,65 | 0,161829331 |
| Cd24a   | 0,21  | 0,833606844 | -0,28 | 0,825120426 | -0,43 | 0,73657347  | -6,48 | 0,001901534 | 0,18  | 0,81469483  |
| Cd27    | 0,2   | 0,87282087  | -0,25 | 0,83754738  | -0,27 | 0,667037569 | 0,12  | 0,908141892 | 0,25  | 0,80155635  |
| Cd274   | 2,77  | 0,127818524 | 2,5   | 0,035816592 | -4,09 | 1,89286E-05 | 0,21  | 0,687605168 | 3,09  | 0,000566879 |
| Cd276   | -1,39 | 0,097625832 | -0,83 | 0,187729631 | 1,63  | 0,096304296 | 5,41  | 0,005620327 | -0,25 | 0,844105751 |
| Cd28    | -0,17 | 0,840909921 | -0,04 | 0,974580396 | -0,04 | 0,967930981 | 0,23  | 0,824569684 | -0,01 | 0,992997824 |
| Cd2ap   | -0,18 | 0,677390848 | 0,04  | 0,969019461 | 0,94  | 0,197507065 | -0,41 | 0,45796348  | 0,26  | 0,712793529 |

|         |       |             |       |             |       |             |       |             |       |             |
|---------|-------|-------------|-------|-------------|-------|-------------|-------|-------------|-------|-------------|
| Cd2bp2  | -0,48 | 0,269151748 | 0,14  | 0,831404974 | 0,06  | 0,949633833 | 0,33  | 0,347147789 | 0,05  | 0,950308536 |
| Cd300a  | 0,21  | 0,836344315 | 0,14  | 0,893897056 | 0,33  | 0,592823997 | 0,02  | 0,966197507 | 0,04  | 0,962631948 |
| Cd300c  | 0,58  | 0,413946686 | 0,24  | 0,677000136 | -0,05 | 0,947595442 | 0,02  | 0,970373003 | 0,1   | 0,893571479 |
| Cd300e  | 0,24  | 0,617280733 | -0,45 | 0,232378975 | -0,08 | 0,938771378 | 0,15  | 0,710759579 | 0,04  | 0,979456872 |
| Cd300lb | 0,19  | 0,740095184 | -0,29 | 0,645950583 | 0,86  | 0,209024044 | 0,47  | 0,469374878 | 0,13  | 0,906338603 |
| Cd300ld | 0,15  | 0,871580532 | 0,25  | 0,852461907 | -0,05 | 0,987003605 | -0,19 | 0,861140391 | 0,09  | 0,937558003 |
| Cd300lf | 0,05  | 0,964154899 | -0,7  | 0,531460115 | 0,99  | 0,505588174 | 0,37  | 0,81314314  | -0,14 | 0,944318268 |
| Cd300lg | -1,15 | 0,060731662 | -0,22 | 0,842663656 | -0,61 | 0,437376681 | -1,66 | 0,086968945 | -0,88 | 0,177488953 |
| Cd300lh | 0,68  | 0,132779189 | -0,06 | 0,906470847 | -0,06 | 0,956570063 | 0,25  | 0,449259448 | -0,13 | 0,830813323 |
| Cd302   | 0,29  | 0,7494877   | -0,24 | 0,73623784  | 0,28  | 0,742758388 | 0,6   | 0,534171194 | 0,26  | 0,763240477 |
| Cd320   | 0     | 0,997205466 | -0,22 | 0,898910059 | 0,19  | 0,853998055 | 0     | 0,998900166 | -0,36 | 0,623214829 |
| Cd33    | -1    | 0,350457551 | -1,42 | 0,087315688 | 1,35  | 0,305948438 | 4,59  | 0,003907268 | -0,68 | 0,319433013 |
| Cd34    | -0,31 | 0,401159049 | 0,1   | 0,825162812 | 0,38  | 0,530318769 | 0,14  | 0,729857506 | 0,16  | 0,800640803 |
| Cd36    | -0,97 | 0,284652595 | -0,45 | 0,493080796 | -0,18 | 0,858001959 | 0,33  | 0,676116225 | -1,14 | 0,087062852 |
| Cd37    | 0,14  | 0,828837975 | -0,65 | 0,351185018 | -0,27 | 0,790468311 | 0,15  | 0,709570719 | -0,46 | 0,376385479 |
| Cd38    | 0,03  | 0,959218841 | 0,13  | 0,786583797 | 0,09  | 0,921817943 | -0,26 | 0,694674257 | 0,41  | 0,574516113 |
| Cd3d    | 0,15  | 0,824010969 | -0,12 | 0,78280538  | -0,2  | 0,819734466 | 0,07  | 0,916072825 | 0,18  | 0,854602258 |
| Cd3e    | 0,32  | 0,565823399 | 0,17  | 0,761966546 | -0,52 | 0,485917439 | -0,1  | 0,841722279 | 0,19  | 0,790676906 |
| Cd3eap  | -0,16 | 0,764189777 | -0,14 | 0,790939978 | 0,09  | 0,900068203 | 0,51  | 0,288067607 | 0,3   | 0,665054064 |
| Cd3g    | 0,17  | 0,921111827 | 0,14  | 0,952427593 | -0,17 | 0,870377336 | 0,57  | 0,265477862 | 1,1   | 0,038285087 |
| Cd4     | 0,22  | 0,739638841 | 0,17  | 0,842663656 | 0,2   | 0,772397144 | -0,15 | 0,889143988 | -0,03 | 0,983886537 |
| Cd40    | 0,92  | 0,104092085 | 1,17  | 0,292069687 | -0,19 | 0,750826735 | -0,78 | 0,280091537 | 1,7   | 0,008416112 |
| Cd40lg  | -0,06 | 0,95290436  | 0,08  | 0,914353074 | -0,48 | 0,359851071 | 0,01  | 0,98810036  | -0,02 | 0,979456872 |
| Cd44    | 0,19  | 0,893324513 | -0,32 | 0,644516897 | 0,91  | 0,209534486 | 2,11  | 0,009180735 | -0,23 | 0,712793529 |
| Cd46    | 0,46  | 0,553849378 | 0,28  | 0,851610126 | 0,73  | 0,436598911 | -2,13 | 0,1028036   | -0,28 | 0,881968395 |
| Cd47    | 0,45  | 0,354776657 | 0,71  | 0,31069547  | 0,01  | 0,997220401 | 0,07  | 0,937049376 | 0,97  | 0,125980045 |
| Cd48    | 0,36  | 0,425285092 | 0,18  | 0,854067667 | -1,11 | 0,234445998 | 0,3   | 0,592313668 | 0,86  | 0,160991723 |
| Cd5     | 0,32  | 0,538846664 | -0,49 | 0,224939184 | 0,39  | 0,585699407 | 0,28  | 0,582237303 | -0,03 | 0,97872616  |
| Cd52    | 0,23  | 0,737887307 | 0,3   | 0,807175471 | -0,24 | 0,855960795 | -0,16 | 0,774359285 | 0,54  | 0,542678129 |
| Cd53    | 0,71  | 0,600680579 | -0,12 | 0,831404974 | -0,07 | 0,976092199 | -0,06 | 0,963752888 | 0,55  | 0,536721752 |
| Cd55    | -0,58 | 0,296573383 | -0,56 | 0,758387553 | 0,15  | 0,894109709 | -0,07 | 0,94720143  | 0,19  | 0,852678079 |
| Cd55b   | -0,17 | 0,85515494  | 0,58  | 0,395964974 | -0,21 | 0,863181793 | -0,44 | 0,428751011 | -0,15 | 0,840531579 |
| Cd59a   | -0,16 | 0,776721795 | 0,22  | 0,696084119 | -0,03 | 0,982449079 | -1,02 | 0,032929006 | -0,79 | 0,135418412 |
| Cd59b   | 0,01  | 0,997888714 | -0,07 | 0,965413567 | -0,62 | 0,296072904 | -1,03 | 0,33942107  | -0,69 | 0,462558109 |
| Cd5l    | 0,11  | 0,903817676 | -0,21 | 0,758387553 | 0     | 0,999318343 | -0,2  | 0,86253711  | -0,34 | 0,668358769 |

|        |       |             |       |             |       |             |       |             |       |             |
|--------|-------|-------------|-------|-------------|-------|-------------|-------|-------------|-------|-------------|
| Cd6    | -0,01 | 0,98659023  | -0,07 | 0,903814217 | -0,17 | 0,829944316 | -0,12 | 0,808985118 | 0,09  | 0,912890826 |
| Cd63   | 0,29  | 0,486906643 | 0,16  | 0,725783826 | 0,23  | 0,77027744  | 1,25  | 0,01321417  | 0,76  | 0,086657686 |
| Cd68   | 0,33  | 0,483299704 | 0,31  | 0,703291096 | -0,25 | 0,700259013 | 0,21  | 0,850749612 | -0,13 | 0,917766344 |
| Cd69   | 1,12  | 0,218444456 | 0,18  | 0,904399112 | 0,17  | 0,89223455  | -1,74 | 0,113471733 | 0,76  | 0,507412829 |
| Cd7    | 0,21  | 0,774127883 | -0,13 | 0,850001559 | -0,79 | 0,548839869 | -0,57 | 0,158696876 | -0,48 | 0,362275161 |
| Cd70   | 0,16  | 0,840909921 | -0,15 | 0,906267371 | -0,54 | 0,436827113 | 0,81  | 0,525192806 | -0,01 | 0,997769477 |
| Cd72   | 0,13  | 0,765643907 | -0,48 | 0,732044571 | -0,03 | 0,969476711 | 1,12  | 0,129192073 | 0,17  | 0,868299217 |
| Cd74   | 0,92  | 0,453061353 | 1,54  | 0,087315688 | -3,4  | 6,91718E-05 | -0,97 | 0,074829553 | 1,17  | 0,022904601 |
| Cd79a  | -0,19 | 0,903817676 | -0,14 | 0,946599376 | -0,22 | 0,850868333 | 0,04  | 0,989926105 | -1,07 | 0,427487807 |
| Cd79b  | -0,24 | 0,635188524 | 1,14  | 0,260289589 | -0,31 | 0,546286708 | -0,01 | 0,997245643 | 0,35  | 0,792346596 |
| Cd80   | -0,01 | 0,996219097 | 0,25  | 0,589266926 | 0,85  | 0,660920525 | -0,03 | 0,971771171 | -0,02 | 0,984125319 |
| Cd81   | -0,4  | 0,258628084 | -0,32 | 0,420485441 | 0,4   | 0,290996536 | -0,48 | 0,164251214 | -0,19 | 0,735152891 |
| Cd82   | -0,22 | 0,577107031 | 0,08  | 0,930242005 | 1,04  | 0,134988022 | 1,32  | 0,05133893  | -0,17 | 0,83296791  |
| Cd83   | -0,48 | 0,249044729 | 0,1   | 0,882931058 | -0,02 | 0,982241391 | -0,24 | 0,56514466  | -0,3  | 0,693130577 |
| Cd84   | 0,16  | 0,838208309 | 0,87  | 0,414656674 | -0,07 | 0,943788892 | -0,79 | 0,43636337  | 0,16  | 0,922086387 |
| Cd86   | 0,15  | 0,91881793  | -0,1  | 0,915265253 | 0,74  | 0,310532869 | 1,3   | 0,060385323 | 0,88  | 0,162205509 |
| Cd8a   | 0,12  | 0,799493751 | 0     | 0,998754213 | -0,57 | 0,382532767 | 0,16  | 0,784621098 | 0,15  | 0,803566512 |
| Cd8b1  | 0,01  | 0,997842309 | -0,5  | 0,407399379 | 0,63  | 0,675674731 | -0,39 | 0,56246056  | -0,85 | 0,211416778 |
| Cd9    | -0,23 | 0,508191918 | -0,2  | 0,607752929 | 0,11  | 0,907951869 | -0,18 | 0,665334658 | 0,06  | 0,940092696 |
| Cd93   | -0,73 | 0,083421478 | -0,31 | 0,448385091 | 0,61  | 0,1819518   | 0,25  | 0,426759693 | -0,49 | 0,268016026 |
| Cd96   | 0,01  | 0,993728727 | 0,38  | 0,755498335 | -1,04 | 0,196341416 | -0,5  | 0,520109913 | 0,84  | 0,356465925 |
| Cd99   | 0     | 0,998769353 | -0,01 | 0,98459889  | 0,17  | 0,75341132  | -0,03 | 0,952768654 | 0,24  | 0,669861917 |
| Cd99I2 | 0,02  | 0,988447997 | -0,15 | 0,841007084 | 0,16  | 0,854432422 | -0,46 | 0,370452839 | -0,19 | 0,821727352 |
| Cda    | -0,39 | 0,56461489  | -0,42 | 0,608587988 | 0,43  | 0,37970041  | 2,66  | 0,02248719  | -0,24 | 0,823776279 |
| Cdadcl | -0,45 | 0,39120208  | 0,07  | 0,941811651 | -0,26 | 0,761861872 | -0,61 | 0,353191906 | -0,28 | 0,720844381 |
| Cdan1  | -0,37 | 0,784946911 | -0,23 | 0,840048559 | 0,97  | 0,154586266 | 0,23  | 0,561656192 | -0,18 | 0,836697963 |
| Cdc123 | -0,13 | 0,839375532 | -0,38 | 0,564387918 | 0     | 0,999931921 | 0,64  | 0,153380922 | -0,01 | 0,991480325 |
| Cdc14a | 0,03  | 0,972458819 | -0,11 | 0,866248527 | 0,14  | 0,913132002 | -1,75 | 0,006782641 | 0,29  | 0,565817768 |
| Cdc14b | 0,63  | 0,485067976 | -0,07 | 0,959873629 | -0,33 | 0,725725788 | 0,07  | 0,983166423 | 0,22  | 0,942854766 |
| Cdc16  | -0,23 | 0,714793039 | -0,72 | 0,261045839 | 0,57  | 0,507095234 | 1,35  | 0,033579739 | -0,05 | 0,977967676 |
| Cdc20  | -1,57 | 0,126768659 | -1,26 | 0,143113166 | 2,03  | 0,049219704 | 2,12  | 0,083401972 | -0,06 | 0,97872616  |
| Cdc20b | 0,07  | 0,950669622 | -0,23 | 0,802979985 | 0,12  | 0,903876499 | 0,5   | 0,347209883 | 0,25  | 0,711133698 |
| Cdc23  | -0,98 | 0,242651292 | -0,14 | 0,775155136 | 0,28  | 0,752757867 | -0,54 | 0,118283887 | -0,94 | 0,155416583 |
| Cdc25a | -1,27 | 0,089282283 | -0,64 | 0,493580894 | 0,52  | 0,520548688 | 1,65  | 0,088393639 | 0,26  | 0,825990389 |
| Cdc25b | -0,4  | 0,662416763 | -0,2  | 0,751382934 | 0,51  | 0,432229079 | 0,02  | 0,983462169 | 0,19  | 0,858981977 |

|          |       |             |       |             |       |             |       |             |       |             |
|----------|-------|-------------|-------|-------------|-------|-------------|-------|-------------|-------|-------------|
| Cdc25c   | -1,45 | 0,077012562 | -0,81 | 0,426168855 | 1     | 0,169619185 | 2,01  | 0,040803179 | 0,27  | 0,744216956 |
| Cdc26    | -0,27 | 0,653288084 | -0,35 | 0,459417799 | -0,07 | 0,94110925  | 0,38  | 0,29760789  | -0,14 | 0,839779961 |
| Cdc27    | 0,11  | 0,877675489 | 0,13  | 0,765974961 | 0,16  | 0,847688308 | 0,69  | 0,086968945 | -0,18 | 0,813308036 |
| Cdc34    | 0,05  | 0,962442672 | -0,25 | 0,764037194 | -0,25 | 0,662322838 | 0,69  | 0,41346505  | 0,77  | 0,496305418 |
| Cdc37    | -0,63 | 0,168487268 | -0,24 | 0,613449608 | 0,5   | 0,212043073 | 0,57  | 0,125868295 | -0,34 | 0,530072156 |
| Cdc3711  | 0,04  | 0,943063292 | 0,32  | 0,642541818 | -0,45 | 0,46668176  | -0,81 | 0,128937917 | 0,13  | 0,871038748 |
| Cdc40    | 0,24  | 0,664036618 | 0,26  | 0,609632892 | 0,52  | 0,533440698 | -0,44 | 0,253713232 | 0,09  | 0,926593692 |
| Cdc42    | -0,06 | 0,895585982 | -0,14 | 0,791143346 | 0,2   | 0,720389578 | 0,34  | 0,411954534 | 0,23  | 0,690432079 |
| Cdc42bpa | 0,01  | 0,993728727 | 0,24  | 0,639095019 | 0,32  | 0,650759853 | -0,3  | 0,499512231 | -0,4  | 0,469594536 |
| Cdc42bpb | -0,47 | 0,219672614 | -0,23 | 0,568187167 | 0,19  | 0,805598605 | 0,28  | 0,413087419 | -0,26 | 0,62559702  |
| Cdc42bpg | 0,06  | 0,932671813 | -0,08 | 0,954866231 | 0,18  | 0,784475468 | -1,05 | 0,148217352 | -0,73 | 0,2700927   |
| Cdc42ep1 | -0,8  | 0,343457563 | -0,22 | 0,560787311 | -0,11 | 0,913333366 | -0,41 | 0,212299024 | -0,16 | 0,854551549 |
| Cdc42ep2 | 0,23  | 0,664456582 | 0,36  | 0,482507034 | -0,3  | 0,665069549 | -0,27 | 0,501060072 | 0,41  | 0,535113522 |
| Cdc42ep3 | 0,05  | 0,921111827 | 0,17  | 0,705624794 | -0,1  | 0,904057901 | 1,19  | 0,021416936 | 0,32  | 0,559721978 |
| Cdc42ep4 | -0,49 | 0,521448538 | 0,27  | 0,691433995 | 0,06  | 0,947595442 | -0,44 | 0,375669019 | -0,1  | 0,929312654 |
| Cdc42ep5 | -0,33 | 0,561414711 | -0,35 | 0,723883833 | -0,2  | 0,929395646 | -0,86 | 0,440885474 | -0,5  | 0,777223566 |
| Cdc42se1 | -0,32 | 0,337439148 | -0,2  | 0,656294004 | 0,28  | 0,51912977  | 0,53  | 0,121231601 | -0,03 | 0,977212067 |
| Cdc42se2 | -0,4  | 0,436969639 | -0,1  | 0,84536438  | -0,18 | 0,855096189 | 0,34  | 0,6447962   | 0,14  | 0,8897371   |
| Cdc45    | -0,94 | 0,189644465 | -1,51 | 0,104392193 | 1,9   | 0,049219704 | 1,7   | 0,027784672 | -0,06 | 0,948759136 |
| Cdc5l    | -0,2  | 0,787002876 | -0,27 | 0,713854173 | 0,24  | 0,898382247 | 0,11  | 0,862369871 | -0,38 | 0,59705803  |
| Cdc6     | -1,15 | 0,07421389  | -0,92 | 0,416858212 | 1,61  | 0,124647743 | 2,64  | 0,038578722 | 0,24  | 0,863207879 |
| Cdc7     | -0,63 | 0,399240334 | -0,45 | 0,644818618 | 0,77  | 0,385794091 | 1,15  | 0,111750195 | -0,22 | 0,840531579 |
| Cdc73    | -0,04 | 0,969016153 | 0,07  | 0,940897177 | -0,04 | 0,969928932 | -0,04 | 0,953414358 | 0,26  | 0,682139425 |
| Cdca2    | -1,11 | 0,09837244  | -0,77 | 0,35381781  | 1,41  | 0,036818657 | 1,43  | 0,062386604 | -0,06 | 0,968130547 |
| Cdca3    | -0,99 | 0,191659981 | -2,19 | 0,104971247 | 2,02  | 0,033971929 | 2,8   | 0,031624209 | -0,4  | 0,587915673 |
| Cdca4    | 0,09  | 0,864400092 | -0,1  | 0,815022365 | 1,12  | 0,124647743 | 0,7   | 0,06564339  | -0,16 | 0,830086988 |
| Cdca5    | -1,12 | 0,27735801  | -0,82 | 0,501438027 | -0,17 | 0,921956183 | 1,61  | 0,05675691  | -0,13 | 0,890833196 |
| Cdca7    | -1,39 | 0,074890017 | -1,34 | 0,151089141 | 1,87  | 0,095446477 | 2,66  | 0,075379341 | -0,24 | 0,916981889 |
| Cdca7l   | 0,54  | 0,535739637 | 1,74  | 0,222998638 | -0,21 | 0,906097666 | 0,68  | 0,616493273 | 1,61  | 0,225054281 |
| Cdca8    | -1,26 | 0,194451699 | -1,49 | 0,297321006 | 1,33  | 0,264885341 | 3,14  | 0,026972102 | -0,25 | 0,846526184 |
| Cdcp1    | -0,17 | 0,757032046 | 0,32  | 0,664787536 | 0,55  | 0,356868414 | 0,17  | 0,835175707 | 0,14  | 0,905842374 |
| Cdcp2    | 0,15  | 0,757394342 | 0,33  | 0,519915586 | -0,11 | 0,909371204 | 0,24  | 0,675213603 | -0,26 | 0,638780444 |
| Cdh1     | 0,37  | 0,578083153 | -0,4  | 0,467362999 | 1,24  | 0,13589176  | -0,59 | 0,373645618 | -0,32 | 0,765809384 |
| Cdh10    | 0,19  | 0,872967981 | 0,37  | 0,66864205  | 0,05  | 0,961453721 | 0,01  | 0,985817346 | -0,04 | 0,96738578  |
| Cdh11    | 0,28  | 0,846773585 | -0,35 | 0,496704705 | -0,75 | 0,191706163 | 0,6   | 0,27730032  | 0,44  | 0,504445914 |

|        |       |             |       |             |       |             |       |             |       |             |
|--------|-------|-------------|-------|-------------|-------|-------------|-------|-------------|-------|-------------|
| Cdh12  | 0,24  | 0,726446163 | 0,47  | 0,424068004 | -0,7  | 0,206323236 | 0,1   | 0,830616529 | 0,72  | 0,223294439 |
| Cdh13  | -0,2  | 0,639070738 | -0,47 | 0,318079221 | 0,42  | 0,475629395 | 2,29  | 0,006048812 | -0,63 | 0,278096307 |
| Cdh15  | -0,1  | 0,832696131 | 0,01  | 0,990380046 | -0,4  | 0,44845155  | -0,12 | 0,841959572 | -0,24 | 0,79265811  |
| Cdh16  | 0,22  | 0,586458491 | -0,1  | 0,882589938 | -0,18 | 0,773851841 | -0,68 | 0,476284901 | 0,32  | 0,792732275 |
| Cdh17  | 0,06  | 0,925910825 | -0,02 | 0,984006421 | 0,48  | 0,610632059 | 0,11  | 0,864379203 | 0,15  | 0,89529118  |
| Cdh18  | 0,2   | 0,67148567  | 0,02  | 0,969374006 | -0,19 | 0,767492577 | 0,28  | 0,405337222 | -0,06 | 0,940774655 |
| Cdh19  | -0,14 | 0,843101965 | 0,25  | 0,691946755 | -0,05 | 0,961915089 | -0,24 | 0,601688484 | -0,04 | 0,973428839 |
| Cdh2   | 0,22  | 0,878548823 | 0,32  | 0,746239002 | 1,73  | 0,068894819 | -0,33 | 0,774826947 | -0,78 | 0,429206436 |
| Cdh20  | 0,42  | 0,421539482 | 0,17  | 0,772558681 | -0,3  | 0,670137495 | -0,05 | 0,959517097 | 0,37  | 0,668706357 |
| Cdh22  | -0,53 | 0,202131121 | 0,19  | 0,811014932 | -0,26 | 0,66027586  | 0,04  | 0,939446012 | -0,12 | 0,861195094 |
| Cdh23  | 0,11  | 0,837953479 | -0,06 | 0,925569254 | 0     | 0,997268369 | 0,25  | 0,80174822  | -0,7  | 0,419557334 |
| Cdh24  | -0,2  | 0,829299665 | 0,28  | 0,716661568 | 0,34  | 0,625578952 | 0,74  | 0,110770334 | 0,17  | 0,845667625 |
| Cdh26  | 0,36  | 0,438318142 | 0,22  | 0,781665479 | -0,05 | 0,953456022 | -0,64 | 0,205805452 | -0,44 | 0,474415415 |
| Cdh3   | -0,1  | 0,891309235 | 0,07  | 0,940046211 | 0,21  | 0,751758339 | 0,19  | 0,675151978 | -0,09 | 0,932627212 |
| Cdh4   | 0,16  | 0,858159992 | 0,05  | 0,966717367 | -0,21 | 0,71773035  | -0,96 | 0,094014104 | -0,62 | 0,298722773 |
| Cdh5   | -0,23 | 0,498560785 | -0,17 | 0,649611595 | 0,28  | 0,47576046  | 0,3   | 0,348369974 | -0,23 | 0,654016085 |
| Cdh6   | 0,13  | 0,909885273 | -0,08 | 0,920345352 | -0,33 | 0,688126003 | -1,19 | 0,152903153 | -0,75 | 0,39916841  |
| Cdh7   | 0,51  | 0,36075848  | 0,43  | 0,659883931 | -0,24 | 0,824083851 | -0,16 | 0,848542041 | 0,02  | 0,990091016 |
| Cdh8   | -0,15 | 0,790694396 | -0,05 | 0,941609372 | -0,19 | 0,756043917 | -0,02 | 0,983462169 | -0,03 | 0,981913783 |
| Cdh9   | -0,25 | 0,72989626  | 0,49  | 0,383504117 | -0,06 | 0,944774599 | -0,25 | 0,667849424 | 0,41  | 0,583631554 |
| Cdhr1  | 0,19  | 0,687662951 | -0,25 | 0,641804702 | -0,05 | 0,953345773 | 0,12  | 0,77238043  | 0,24  | 0,751268314 |
| Cdhr2  | 0,44  | 0,460103183 | 0,42  | 0,388579184 | -0,21 | 0,766359141 | -0,66 | 0,149241653 | -0,14 | 0,890957032 |
| Cdhr3  | 0,15  | 0,879743728 | 0,07  | 0,910357467 | -0,25 | 0,700061351 | -0,2  | 0,599572973 | -0,21 | 0,731865047 |
| Cdhr4  | 0,83  | 0,221474528 | 0,22  | 0,83754738  | -0,66 | 0,362360659 | 0,03  | 0,968266606 | 0,57  | 0,450543672 |
| Cdhr5  | 0,43  | 0,68194299  | -0,08 | 0,900801202 | -0,24 | 0,733560986 | 0,26  | 0,534841007 | 0,61  | 0,524086785 |
| Cdip1  | -0,18 | 0,832696131 | -0,53 | 0,275147283 | -0,06 | 0,950846671 | -0,13 | 0,799835488 | -0,03 | 0,97425848  |
| Cdip1  | -0,63 | 0,20299588  | -0,13 | 0,751316952 | -0,25 | 0,706638581 | 1     | 0,027856791 | -0,55 | 0,261673634 |
| Cdk1   | -1,41 | 0,094134789 | -1,73 | 0,094438943 | 1,61  | 0,088283242 | 4,43  | 0,04232117  | 0,11  | 0,972103695 |
| Cdk10  | 0,09  | 0,911404262 | 0     | 1           | 0,5   | 0,448903245 | -0,85 | 0,076292801 | -0,27 | 0,716859687 |
| Cdk11b | -0,32 | 0,538942405 | -0,42 | 0,509013394 | -0,21 | 0,808264821 | -0,1  | 0,885417869 | -0,5  | 0,331912927 |
| Cdk12  | 0,89  | 0,08334043  | 0,53  | 0,341083995 | -0,5  | 0,547368463 | 0,16  | 0,833642216 | 0,55  | 0,508254964 |
| Cdk13  | 0,12  | 0,836628681 | 0,01  | 0,990052916 | 0,29  | 0,647707415 | 0,18  | 0,642729506 | 0,22  | 0,765809384 |
| Cdk14  | -0,57 | 0,446039618 | -0,02 | 0,994137877 | 1,54  | 0,036818657 | 0,1   | 0,951697927 | -0,46 | 0,727513567 |
| Cdk15  | -0,27 | 0,628802144 | 0,11  | 0,829626088 | 0,24  | 0,733423502 | -0,26 | 0,532527562 | -0,37 | 0,611234576 |
| Cdk16  | -0,1  | 0,832696131 | -0,31 | 0,461889809 | 0,18  | 0,778811571 | 0,47  | 0,212687534 | -0,31 | 0,559721978 |

|            |       |             |       |             |       |             |       |             |       |             |
|------------|-------|-------------|-------|-------------|-------|-------------|-------|-------------|-------|-------------|
| Cdk17      | -0,15 | 0,834886413 | 0,02  | 0,985373807 | -0,3  | 0,684455958 | 0,52  | 0,390424873 | 0,45  | 0,529128921 |
| Cdk18      | 0,32  | 0,664456582 | -0,12 | 0,920194572 | 0,49  | 0,560960593 | -1,05 | 0,031845614 | -0,11 | 0,907002987 |
| Cdk19      | -0,59 | 0,242446083 | -0,06 | 0,956935029 | 0,41  | 0,678840444 | -0,87 | 0,057215016 | -0,33 | 0,568721515 |
| Cdk19os    | -0,04 | 0,940822026 | -0,05 | 0,928780248 | 0,06  | 0,929871006 | 0,03  | 0,960885529 | -0,11 | 0,885318142 |
| Cdk2       | -0,52 | 0,187671655 | -0,25 | 0,602956592 | 0,27  | 0,70635953  | 0,57  | 0,093785342 | -0,24 | 0,673145862 |
| Cdk20      | 0,05  | 0,963831902 | -0,06 | 0,949561659 | 0,12  | 0,911921787 | 0,25  | 0,832176117 | 0,09  | 0,953297732 |
| Cdk2ap1    | -0,84 | 0,365842999 | -0,29 | 0,829892665 | 0,49  | 0,760679785 | -0,36 | 0,41855272  | -1,37 | 0,025180565 |
| Cdk2ap2    | 0,27  | 0,66331039  | -0,22 | 0,593423633 | 0,18  | 0,803209705 | 1,12  | 0,015523546 | 0,43  | 0,46819866  |
| Cdk3-ps    | -0,38 | 0,375878015 | 0,04  | 0,982786635 | 0,06  | 0,965703516 | 0,11  | 0,923403061 | 0,34  | 0,735152891 |
| Cdk4       | -0,48 | 0,261843547 | -0,52 | 0,228649557 | 0,66  | 0,263873104 | 0,86  | 0,096792741 | 0,23  | 0,733488478 |
| Cdk5       | 0,19  | 0,770273483 | -0,28 | 0,794404033 | 1,48  | 0,13589176  | 0,6   | 0,551209052 | -0,12 | 0,940438527 |
| Cdk5r1     | 0,11  | 0,832513798 | -0,02 | 0,984006421 | -0,12 | 0,856416051 | 0,19  | 0,797123056 | -0,02 | 0,984125319 |
| Cdk5r2     | 0,19  | 0,72915524  | 0,04  | 0,92999728  | -0,19 | 0,781474651 | 0,16  | 0,828955037 | -0,04 | 0,973162988 |
| Cdk5rap1   | 0,26  | 0,791959729 | -0,11 | 0,90164068  | 0,15  | 0,846975965 | 0,04  | 0,958172386 | -0,21 | 0,810276195 |
| Cdk5rap2   | -0,25 | 0,611644482 | -0,55 | 0,518139231 | 0,78  | 0,147248241 | 0,53  | 0,426488138 | -0,41 | 0,662208123 |
| Cdk5rap3   | -0,31 | 0,553849378 | 0,03  | 0,982034937 | -0,44 | 0,611144549 | 0,68  | 0,209491757 | 0,04  | 0,969937563 |
| Cdk6       | 1,22  | 0,277154156 | 0,6   | 0,219055424 | -0,96 | 0,088511698 | 1,46  | 0,011555935 | 0,89  | 0,051651981 |
| Cdk7       | 0,12  | 0,841140165 | -0,08 | 0,887493001 | 0,26  | 0,600679499 | 0,17  | 0,767937787 | -0,12 | 0,906339416 |
| Cdk8       | 0,17  | 0,842216945 | 0,03  | 0,956049982 | -0,42 | 0,740505784 | 0,48  | 0,559000918 | 0,41  | 0,735737121 |
| Cdk9       | -0,3  | 0,690610481 | -0,17 | 0,77875496  | 0,71  | 0,233719695 | 0,12  | 0,745159546 | 0,01  | 0,991315044 |
| Cdkal1     | 0,15  | 0,925510521 | -0,34 | 0,699652464 | -0,13 | 0,945583021 | -0,44 | 0,357720393 | -0,46 | 0,524708288 |
| Cdkl1      | -0,43 | 0,698332739 | -0,37 | 0,792112243 | 0,44  | 0,412477493 | 1,83  | 0,026435879 | -0,18 | 0,836061657 |
| Cdkl2      | 0,35  | 0,647745082 | 0,17  | 0,733708652 | -0,01 | 0,994572791 | 0,43  | 0,267147508 | 1,01  | 0,271713687 |
| Cdkl3      | 0,17  | 0,86343981  | 0,51  | 0,315374657 | 0,14  | 0,898382247 | -0,28 | 0,562758592 | -0,03 | 0,979456872 |
| Cdkl4      | 0,12  | 0,892823025 | 0,35  | 0,878066294 | -0,25 | 0,755102847 | -0,24 | 0,77370302  | 0,02  | 0,985982505 |
| Cdkl5      | -0,06 | 0,950532575 | -0,78 | 0,255252394 | -0,54 | 0,676139587 | -1,42 | 0,03784406  | 0,08  | 0,938191016 |
| Cdkn1a     | 0,26  | 0,662188763 | 0,13  | 0,878725004 | -0,33 | 0,602775092 | -0,49 | 0,506669044 | 0,37  | 0,657070737 |
| Cdkn1b     | -0,03 | 0,972720447 | 0,43  | 0,441733752 | -0,19 | 0,700061351 | -0,49 | 0,351264493 | -0,42 | 0,550388446 |
| Cdkn1c     | -0,39 | 0,420942329 | 0,25  | 0,850001559 | 0,08  | 0,941344852 | -1,03 | 0,052836617 | -0,09 | 0,922921816 |
| Cdkn2a     | -0,04 | 0,964272364 | 0,06  | 0,937348524 | 1,17  | 0,053188498 | -0,28 | 0,406606628 | -0,07 | 0,944241841 |
| Cdkn2aip   | 0,05  | 0,950669622 | -0,32 | 0,73274163  | 0,15  | 0,807402106 | -0,53 | 0,494422413 | -0,28 | 0,639785525 |
| Cdkn2aipnl | -0,41 | 0,421957622 | -0,47 | 0,261025347 | 0,1   | 0,864411302 | 0,12  | 0,774543695 | -0,39 | 0,439301508 |
| Cdkn2b     | 0,08  | 0,886464924 | -0,42 | 0,529410744 | 0,37  | 0,638066726 | 0,98  | 0,076348362 | 0,54  | 0,484545257 |
| Cdkn2c     | 0,43  | 0,784951771 | -0,01 | 0,999395995 | 0,88  | 0,179552168 | 0,3   | 0,530766711 | 0,06  | 0,948759136 |
| Cdkn2d     | -0,09 | 0,908281692 | -0,07 | 0,960071209 | -0,54 | 0,385794091 | -0,7  | 0,186919907 | 0,24  | 0,654271552 |

|          |       |             |       |             |       |             |       |             |       |             |
|----------|-------|-------------|-------|-------------|-------|-------------|-------|-------------|-------|-------------|
| Cdkn3    | -1,58 | 0,017960272 | -0,99 | 0,514880019 | 2,48  | 0,080523802 | 2,32  | 0,018624038 | -0,89 | 0,316401979 |
| Cdnf     | -0,06 | 0,964272364 | 0,17  | 0,771641267 | 0,37  | 0,702689055 | -0,91 | 0,155687636 | 0,14  | 0,937045732 |
| Cdo1     | -0,29 | 0,714662474 | -0,15 | 0,803283255 | -1,02 | 0,404120029 | -0,75 | 0,37252791  | -1,15 | 0,287947035 |
| Cdon     | -0,21 | 0,855593005 | -0,66 | 0,426168855 | 0,02  | 0,990699622 | -0,25 | 0,770622324 | -0,34 | 0,728388857 |
| Cdpf1    | 0,28  | 0,617280733 | -0,04 | 0,948628187 | -0,19 | 0,759598044 | 0,18  | 0,722043125 | -0,07 | 0,946463658 |
| Cdr1     | 0,61  | 0,515764726 | -0,23 | 0,670859269 | -0,01 | 0,987003605 | 0,23  | 0,620071993 | 0,23  | 0,650667979 |
| Cdr2     | -0,11 | 0,838570994 | -0,08 | 0,859585789 | 0,29  | 0,644135796 | 2,03  | 0,014159207 | -0,07 | 0,956610289 |
| Cdr2l    | -0,37 | 0,617280733 | -0,18 | 0,720902851 | 0,22  | 0,785781821 | 0,83  | 0,056533887 | 0,02  | 0,986609475 |
| Cdr4     | -0,04 | 0,948926586 | -0,38 | 0,503791751 | 0,02  | 0,984231899 | 0,25  | 0,655562239 | -0,09 | 0,910721379 |
| Cdr4os1  | -0,01 | 0,991516118 | -0,01 | 0,990088847 | -0,06 | 0,94110925  | 0,21  | 0,651882106 | 0,18  | 0,792404969 |
| Cdr4os2  | 0,11  | 0,791284141 | 0,05  | 0,932628106 | -0,09 | 0,906501943 | -0,1  | 0,794368434 | -0,07 | 0,927536545 |
| Cds1     | 0,14  | 0,914758024 | -0,29 | 0,765325717 | 0,16  | 0,844258774 | 1,17  | 0,106060853 | -0,33 | 0,715928244 |
| Cds2     | -0,42 | 0,471408054 | 0,32  | 0,717074519 | -0,51 | 0,185430653 | -0,41 | 0,259810388 | -0,15 | 0,854369491 |
| Cdsn     | -0,11 | 0,791808536 | -0,14 | 0,84059163  | -0,01 | 0,990836784 | 0,24  | 0,686014055 | -0,24 | 0,735192953 |
| Cdt1     | 0,21  | 0,613859526 | -1,1  | 0,350749298 | 0,37  | 0,485625524 | 1,42  | 0,151723743 | 0,15  | 0,894779776 |
| Cdv3     | -0,35 | 0,412575527 | 0,04  | 0,938711163 | 0,49  | 0,548288344 | 0,44  | 0,254543003 | 0,19  | 0,765419939 |
| Cdx1     | 0,12  | 0,859044359 | 0,12  | 0,86410431  | -0,05 | 0,953951069 | -0,02 | 0,976663465 | 0,07  | 0,925898218 |
| Cdx2     | -0,14 | 0,799472935 | -0,15 | 0,704846734 | 0,04  | 0,973732268 | 0,25  | 0,612817491 | 0,32  | 0,654392084 |
| Cdx4     | 0,27  | 0,619738681 | -0,35 | 0,509013394 | 0,38  | 0,693655482 | 0,36  | 0,272734629 | 0,13  | 0,891991231 |
| Cdyl     | -0,3  | 0,834886413 | 0,02  | 0,991061965 | 0,01  | 0,994130625 | 0,19  | 0,899335603 | -0,37 | 0,757562438 |
| Cdyl2    | -0,1  | 0,8993604   | -0,43 | 0,49125334  | -0,2  | 0,759119898 | 0,56  | 0,093655842 | 0,02  | 0,978579733 |
| Ceacam1  | -0,21 | 0,799145501 | -0,73 | 0,19811774  | 0,39  | 0,787905724 | -1,53 | 0,011850827 | -0,11 | 0,879398898 |
| Ceacam10 | 0,14  | 0,818611891 | 0,18  | 0,683839266 | 0,16  | 0,921956183 | -0,22 | 0,488293987 | 0,02  | 0,981079016 |
| Ceacam11 | -0,34 | 0,523556522 | -0,28 | 0,649104789 | -0,3  | 0,697347038 | 0,01  | 0,98423292  | -0,17 | 0,823098095 |
| Ceacam12 | 0,07  | 0,934802231 | -0,73 | 0,304034247 | -0,29 | 0,775163644 | 0,62  | 0,325265273 | 0,04  | 0,974595412 |
| Ceacam13 | 0,17  | 0,782749939 | -0,29 | 0,670859269 | 0,14  | 0,88485244  | 0,15  | 0,779796922 | 0,08  | 0,938825649 |
| Ceacam14 | 0,14  | 0,934759867 | -0,1  | 0,970832543 | 0,08  | 0,96186488  | 0,26  | 0,911559684 | 0,09  | 0,973382116 |
| Ceacam15 | -0,23 | 0,613990129 | -0,13 | 0,852719676 | -0,05 | 0,946777487 | 0,97  | 0,212269519 | 0,32  | 0,760657649 |
| Ceacam16 | -0,05 | 0,955784723 | -0,04 | 0,958376623 | -0,22 | 0,770526999 | -0,11 | 0,888882608 | -0,04 | 0,968130547 |
| Ceacam18 | -0,37 | 0,476324469 | -0,1  | 0,923022018 | 0,38  | 0,530264141 | 0,21  | 0,79513623  | -0,14 | 0,844265172 |
| Ceacam19 | -0,15 | 0,900892804 | -0,92 | 0,610055593 | -0,14 | 0,903280224 | 0,06  | 0,923587701 | 0,02  | 0,983469081 |
| Ceacam20 | -0,09 | 0,892124736 | -0,2  | 0,819802664 | -0,26 | 0,777918093 | 0,68  | 0,414123109 | 0,15  | 0,905581898 |
| Ceacam3  | 0,46  | 0,392545323 | 0,09  | 0,954699934 | -0,14 | 0,816883729 | 0,34  | 0,728730534 | 0,39  | 0,758052028 |
| Ceacam5  | -0,02 | 0,991216662 | 0,39  | 0,505089058 | -0,26 | 0,721639169 | -0,68 | 0,249057641 | 0,24  | 0,85041485  |
| Ceacam9  | 0,17  | 0,758067417 | 0,09  | 0,935329426 | -0,3  | 0,599127793 | 0,21  | 0,724713441 | 0,08  | 0,918589668 |



|            |       |             |       |             |       |             |       |             |       |             |
|------------|-------|-------------|-------|-------------|-------|-------------|-------|-------------|-------|-------------|
| Ceacam-ps1 | 0,03  | 0,963914207 | 0,25  | 0,750160982 | 0,27  | 0,662451176 | -0,06 | 0,932312961 | 0,28  | 0,641383281 |
| Cebpa      | -0,1  | 0,944291635 | -0,3  | 0,615733281 | -0,37 | 0,705811313 | -0,57 | 0,669457175 | 0,17  | 0,926008345 |
| Cebpb      | 0,03  | 0,963329626 | 0,02  | 0,966717367 | -0,97 | 0,197507065 | 0,08  | 0,852737306 | -0,04 | 0,973428839 |
| Cebpd      | 0,37  | 0,360203842 | 0,33  | 0,654719935 | -0,23 | 0,715403033 | -1,82 | 0,02226654  | 0,05  | 0,952971656 |
| Cebpe      | 0,04  | 0,955200574 | -0,19 | 0,700297886 | 0,02  | 0,988640659 | 0,1   | 0,846467498 | -0,02 | 0,984125319 |
| Cebpg      | 0,14  | 0,787316698 | 0,09  | 0,849511429 | -0,04 | 0,973468842 | 0,64  | 0,270345878 | 0,56  | 0,389664866 |
| Cebpz      | -0,53 | 0,572424452 | -0,17 | 0,872690378 | 0,44  | 0,501826628 | 0,12  | 0,861959213 | 0,37  | 0,608004947 |
| Cebpz05    | 0,08  | 0,85617916  | -0,15 | 0,790939978 | 0,91  | 0,628048897 | 0,22  | 0,50808678  | -0,41 | 0,432691844 |
| Cecr2      | 0,07  | 0,944652244 | -0,73 | 0,166830486 | -0,18 | 0,856046789 | 0,02  | 0,987861066 | 0,22  | 0,899093911 |
| Cecr5      | -0,38 | 0,301180874 | -0,01 | 0,989177405 | 0,11  | 0,921956183 | -0,06 | 0,924110762 | 0,02  | 0,986849867 |
| Cecr6      | 0,06  | 0,909232325 | -0,01 | 0,99074556  | -0,08 | 0,920828015 | -0,1  | 0,830242783 | 0,01  | 0,991480325 |
| Cel        | -0,17 | 0,779331628 | -0,07 | 0,924525687 | 0,49  | 0,37686469  | 0,2   | 0,774421273 | 0,28  | 0,700466496 |
| Cela1      | 0,14  | 0,832696131 | -0,07 | 0,959685428 | -0,16 | 0,811172876 | -0,47 | 0,377338868 | -0,7  | 0,124339356 |
| Cela2a     | 0,29  | 0,624941638 | -0,04 | 0,955302758 | 0,05  | 0,967767582 | 0,37  | 0,451779583 | -0,11 | 0,904730291 |
| Cela3a     | 0,15  | 0,778869381 | -0,07 | 0,932501187 | 0,02  | 0,993280531 | -0,2  | 0,712869858 | -0,24 | 0,738901324 |
| Cela3b     | -0,33 | 0,657131598 | 0,08  | 0,983071427 | 0,14  | 0,904057901 | -0,05 | 0,970425932 | -0,45 | 0,583952152 |
| Celf1      | -0,72 | 0,153824107 | -0,21 | 0,756369219 | 0,12  | 0,878636183 | 0,85  | 0,214389938 | 0,39  | 0,656756924 |
| Celf2      | -0,12 | 0,910176431 | -0,14 | 0,855974935 | -0,6  | 0,471873683 | -0,72 | 0,229859806 | -0,01 | 0,992694729 |
| Celf3      | -0,05 | 0,976855185 | 0,03  | 0,955382206 | -0,14 | 0,897528177 | 0,32  | 0,701128627 | 0,02  | 0,98653183  |
| Celf4      | -0,31 | 0,697356307 | -0,13 | 0,746794144 | -0,35 | 0,628978443 | 2,04  | 0,008419662 | 0,88  | 0,137394562 |
| Celf5      | 0,17  | 0,832193673 | 0,21  | 0,683632754 | 0,06  | 0,962216849 | 0,22  | 0,58874149  | -0,01 | 0,992607235 |
| Celf6      | 0,39  | 0,500602086 | 0,08  | 0,930192503 | 0,21  | 0,766318679 | 0,01  | 0,991962381 | -0,01 | 0,990448047 |
| Celrr      | 0,16  | 0,778723429 | -0,16 | 0,870642739 | -0,02 | 0,990293767 | 0,18  | 0,630653925 | 0,1   | 0,909363599 |
| Celsr1     | -0,26 | 0,794532611 | 0,02  | 0,984006421 | 0,27  | 0,82622365  | -1,63 | 0,010457494 | -0,75 | 0,404813316 |
| Celsr2     | 0     | 0,999732664 | -0,06 | 0,938711163 | -0,13 | 0,874377639 | -0,89 | 0,047050938 | -0,4  | 0,423057196 |
| Celsr3     | -0,28 | 0,482531929 | -0,06 | 0,925843899 | -0,24 | 0,770526999 | 0,08  | 0,846200569 | -0,22 | 0,691243011 |
| Cemip      | 0,23  | 0,775384541 | -0,22 | 0,794404033 | -0,41 | 0,689058581 | -0,27 | 0,671343347 | 0,13  | 0,939127163 |
| Cend1      | 0,01  | 0,996737514 | -0,42 | 0,726652101 | 0     | 0,998229242 | -0,08 | 0,927360713 | -0,21 | 0,840952901 |
| Cenpa      | -1,01 | 0,157853388 | -0,97 | 0,143349998 | 0,45  | 0,379638471 | 0,62  | 0,310584393 | -1,28 | 0,027132913 |
| Cenpb      | -0,25 | 0,546825193 | -0,24 | 0,614530823 | 0,2   | 0,777810365 | -0,12 | 0,823795118 | -0,26 | 0,694233384 |
| Cenpc1     | -0,11 | 0,882500171 | -0,19 | 0,72305906  | 1,11  | 0,109708617 | 0,67  | 0,248595843 | 0,24  | 0,791971532 |
| Cenpe      | -0,98 | 0,094134789 | -1,2  | 0,185477476 | 0,68  | 0,33457605  | 2,3   | 0,013631524 | 0,01  | 0,992370267 |
| Cenpf      | -0,55 | 0,189393924 | -0,89 | 0,113708779 | 0,57  | 0,503729732 | 1,39  | 0,054125889 | 0,22  | 0,811321326 |
| Cenph      | -0,73 | 0,434641897 | -1,02 | 0,517071375 | 1,07  | 0,044715282 | 1,52  | 0,148750062 | -0,09 | 0,948163009 |
| Cenpi      | -1,41 | 0,141256341 | -1,78 | 0,2014299   | 1,23  | 0,225213429 | 1,84  | 0,108473747 | -0,36 | 0,775441452 |

|           |       |             |       |             |       |             |       |             |       |             |
|-----------|-------|-------------|-------|-------------|-------|-------------|-------|-------------|-------|-------------|
| Cenpj     | 0,11  | 0,909257268 | 0,4   | 0,525873177 | -0,15 | 0,926974012 | -0,03 | 0,970163463 | 1,04  | 0,060191534 |
| Cenpk     | -0,96 | 0,14378094  | -1,51 | 0,172703381 | 1,05  | 0,103498913 | 2,05  | 0,02663501  | 0,07  | 0,954565959 |
| Cenpl     | 0,15  | 0,892124736 | -0,25 | 0,8515863   | -0,18 | 0,885263358 | 0,88  | 0,357167871 | -0,07 | 0,97425848  |
| Cenpm     | -1,23 | 0,137844388 | -1,69 | 0,06498412  | 1,04  | 0,231640032 | 1,52  | 0,028052703 | -0,47 | 0,421255613 |
| Cenpn     | -1,18 | 0,279386788 | -1,37 | 0,244759024 | 0,62  | 0,789802954 | 1,67  | 0,147068899 | 0,59  | 0,631261214 |
| Cenpo     | -0,57 | 0,593540946 | -1,16 | 0,297762088 | 0,06  | 0,968170822 | 1,05  | 0,02663501  | 0,72  | 0,174362184 |
| Cenpp     | -0,44 | 0,629848574 | -0,59 | 0,58096097  | 0,46  | 0,665727181 | 1,12  | 0,258695369 | -0,56 | 0,544938455 |
| Cenpq     | -0,7  | 0,460231397 | -2,86 | 0,123957038 | 0,91  | 0,240838269 | 1,93  | 0,128352546 | -1,42 | 0,045311431 |
| Cenpt     | -0,2  | 0,660482793 | -0,67 | 0,19876663  | 0,25  | 0,630056981 | 0,82  | 0,182543552 | -0,38 | 0,673120647 |
| Cenpu     | -1,16 | 0,151560276 | -0,47 | 0,778589117 | 0,32  | 0,641764537 | 0,16  | 0,890793693 | -1,5  | 0,044184099 |
| Cenpv     | 0,04  | 0,965320014 | -0,74 | 0,217093794 | 1,67  | 0,057484592 | -0,06 | 0,869166856 | -0,14 | 0,89308854  |
| Cenpw     | -1,12 | 0,178589155 | -1,29 | 0,228649557 | 1,07  | 0,209534486 | 2,31  | 0,023328447 | -0,31 | 0,684349871 |
| Cep104    | 0,06  | 0,919110324 | -0,25 | 0,617339955 | 0,11  | 0,871603067 | 0,11  | 0,75983637  | -0,37 | 0,593599703 |
| Cep112    | 0,3   | 0,583073591 | -0,05 | 0,96497149  | -0,36 | 0,628978443 | 0,08  | 0,940948462 | -0,02 | 0,98932552  |
| Cep112os2 | 0,12  | 0,823293054 | 0,12  | 0,877840602 | 0,02  | 0,987208663 | -0,25 | 0,694368504 | -0,62 | 0,236669428 |
| Cep120    | 0,29  | 0,567937252 | 0,02  | 0,96455547  | -0,01 | 0,993379272 | 0     | 1           | 0,49  | 0,277658079 |
| Cep126    | 0     | 0,996998625 | -0,89 | 0,271257402 | 0,08  | 0,953312137 | -0,38 | 0,532234359 | -0,26 | 0,808285534 |
| Cep128    | -0,69 | 0,637411708 | -0,67 | 0,434785723 | 0,57  | 0,456286868 | 0,48  | 0,831764227 | -0,28 | 0,91732927  |
| Cep131    | 0,14  | 0,775326761 | -0,11 | 0,885551526 | 0,34  | 0,56948206  | 0,11  | 0,779547737 | -0,14 | 0,817563348 |
| Cep135    | -0,06 | 0,94727537  | 0,17  | 0,874195024 | 0,22  | 0,760992151 | 0,22  | 0,85301747  | 0,01  | 0,993865559 |
| Cep152    | -0,41 | 0,580117138 | -0,21 | 0,789051952 | 0,45  | 0,431170949 | 0,3   | 0,642853869 | 0,05  | 0,969994712 |
| Cep162    | -0,12 | 0,87840123  | 0,31  | 0,574304911 | 0,57  | 0,385794091 | -0,25 | 0,609789473 | 0,25  | 0,763240477 |
| Cep164    | -0,08 | 0,887555241 | -0,19 | 0,808498635 | 0,43  | 0,683285574 | 0,45  | 0,313422523 | -0,35 | 0,56065793  |
| Cep170    | 0,28  | 0,56461489  | 0,19  | 0,745130453 | 0,26  | 0,721628441 | 1,14  | 0,064024514 | 0,21  | 0,792346596 |
| Cep170b   | -0,06 | 0,949868652 | 0,15  | 0,869734155 | 1,45  | 0,085088133 | -0,25 | 0,662587743 | -0,02 | 0,986609475 |
| Cep19     | -0,11 | 0,93348097  | -0,26 | 0,69257537  | -0,15 | 0,856046789 | 0,82  | 0,203649258 | 0,11  | 0,940438527 |
| Cep192    | -0,17 | 0,832513798 | -0,07 | 0,912379377 | 0,43  | 0,376628542 | 1,35  | 0,019053777 | 0,31  | 0,568964607 |
| Cep250    | -0,54 | 0,18094597  | -0,43 | 0,361859121 | 0,13  | 0,868590766 | 0,32  | 0,332144678 | -0,12 | 0,858314976 |
| Cep290    | -0,26 | 0,568455852 | -0,55 | 0,66616142  | 0,16  | 0,87734396  | 0,1   | 0,903744147 | 0,16  | 0,865258929 |
| Cep295    | -0,18 | 0,739638841 | -0,04 | 0,947107147 | 0,5   | 0,340935136 | 0,19  | 0,74821388  | -0,38 | 0,568652709 |
| Cep350    | 0,03  | 0,963694603 | 0,23  | 0,679869741 | 0,11  | 0,929639429 | -0,33 | 0,400002681 | -0,05 | 0,953056817 |
| Cep41     | -0,16 | 0,724736278 | 0,08  | 0,940046211 | 0,27  | 0,705256612 | 0,4   | 0,328848475 | -0,4  | 0,523459737 |
| Cep44     | -0,32 | 0,724502628 | 0,42  | 0,766425161 | 0,48  | 0,568238479 | -0,11 | 0,954741543 | 0,47  | 0,785366989 |
| Cep55     | -1,55 | 0,1582048   | -2,19 | 0,196295439 | 2,05  | 0,009959295 | 3,75  | 0,007515129 | -0,27 | 0,806478588 |
| Cep57     | -0,12 | 0,908272477 | -0,24 | 0,725076224 | 0,29  | 0,689847701 | -0,03 | 0,9624906   | 0,39  | 0,496318298 |

|          |       |             |       |             |       |             |       |             |       |             |
|----------|-------|-------------|-------|-------------|-------|-------------|-------|-------------|-------|-------------|
| Cep571l  | 0,14  | 0,895682399 | -0,07 | 0,938944149 | -0,31 | 0,76370647  | -0,21 | 0,650385638 | -0,33 | 0,677222415 |
| Cep63    | -0,36 | 0,716985606 | 0,45  | 0,615311543 | 0,12  | 0,885680687 | -0,45 | 0,486817461 | -0,01 | 0,994865893 |
| Cep68    | -0,45 | 0,421378808 | -0,09 | 0,899187644 | -0,59 | 0,337509636 | -0,07 | 0,899003207 | -0,55 | 0,442639471 |
| Cep70    | -0,5  | 0,61321357  | 0,56  | 0,469830103 | 0,56  | 0,349068884 | -0,12 | 0,899335603 | 1,02  | 0,12736808  |
| Cep72    | -0,55 | 0,514570193 | -0,99 | 0,302028989 | 0,55  | 0,59976087  | 1,21  | 0,324103294 | 0,48  | 0,78512653  |
| Cep76    | -1,1  | 0,334676974 | -0,14 | 0,815973308 | 0,76  | 0,338287445 | 0,32  | 0,629687493 | -0,35 | 0,70740752  |
| Cep78    | 0,01  | 0,993728727 | 0,06  | 0,971377261 | 0,44  | 0,598179126 | 0,18  | 0,907485612 | -0,22 | 0,922779415 |
| Cep83    | 0,01  | 0,993728727 | -0,4  | 0,558135871 | 0,66  | 0,329911949 | 0,99  | 0,098415856 | 0,3   | 0,735152891 |
| Cep83os  | -0,11 | 0,91409989  | -0,02 | 0,99422201  | 0,42  | 0,741865177 | -0,5  | 0,637125181 | -0,22 | 0,757428993 |
| Cep85    | -0,04 | 0,95736548  | -0,17 | 0,716589077 | 0,26  | 0,74860644  | -0,55 | 0,41499679  | -0,49 | 0,587735967 |
| Cep85l   | -0,61 | 0,513068992 | -0,44 | 0,661566887 | -0,37 | 0,622546805 | -1,09 | 0,087076169 | -0,48 | 0,332695011 |
| Cep89    | -0,46 | 0,655623232 | -0,6  | 0,510894317 | 0,76  | 0,262891996 | 0,01  | 0,996714438 | -0,4  | 0,694233384 |
| Cep95    | -0,02 | 0,984747015 | 0,5   | 0,242002134 | -0,09 | 0,918668428 | -0,1  | 0,921929178 | -0,34 | 0,806478588 |
| Cep97    | 0,17  | 0,722262013 | -0,49 | 0,641792237 | 0,38  | 0,562169896 | -0,68 | 0,074454367 | -1,2  | 0,043015903 |
| Cept1    | 0,22  | 0,66769053  | 0,1   | 0,933320126 | -0,22 | 0,678840444 | -0,47 | 0,287358861 | 0,55  | 0,208152174 |
| Cer1     | -0,12 | 0,844430494 | -0,31 | 0,582741439 | 0,05  | 0,957327097 | -0,07 | 0,898791139 | -0,14 | 0,844265172 |
| Cercam   | -0,1  | 0,898783715 | 0,16  | 0,880935011 | 1,03  | 0,086523219 | 0,34  | 0,382907979 | 0,14  | 0,859663155 |
| Cerk     | -0,42 | 0,357054834 | 0,23  | 0,644516897 | -0,02 | 0,985977985 | 0,49  | 0,574013778 | 0,03  | 0,983506123 |
| Cerkl    | 0,15  | 0,886889675 | -0,02 | 0,993369093 | -0,07 | 0,936059691 | -0,41 | 0,502423774 | -0,24 | 0,825990389 |
| Cers2    | -0,12 | 0,811859636 | -0,11 | 0,83456599  | 0,36  | 0,661089127 | 0,36  | 0,348518558 | 0,01  | 0,992406971 |
| Cers3    | 0,18  | 0,898672447 | -0,75 | 0,664710351 | -0,06 | 0,964509282 | 0,31  | 0,511363068 | 0,02  | 0,986849867 |
| Cers4    | -0,52 | 0,28187256  | 0,07  | 0,890366033 | -0,1  | 0,937952254 | -0,83 | 0,120678525 | 0,25  | 0,708898543 |
| Cers5    | -0,3  | 0,483299704 | -0,14 | 0,766425161 | 0,18  | 0,864311451 | -0,16 | 0,697357121 | -0,2  | 0,780761723 |
| Cers6    | -0,64 | 0,70841898  | 0,95  | 0,618895172 | -1,09 | 0,197159043 | -0,81 | 0,62296101  | 0,07  | 0,977775233 |
| Ces1a    | -0,21 | 0,77354475  | -0,13 | 0,868234125 | 0,03  | 0,983439952 | 0,48  | 0,28569581  | 0,12  | 0,884321797 |
| Ces1b    | -0,04 | 0,962660554 | -0,66 | 0,31069547  | -0,3  | 0,777568498 | 0,36  | 0,530723335 | 0,18  | 0,809633119 |
| Ces1c    | -0,17 | 0,856969531 | -0,48 | 0,735554037 | 0,02  | 0,986912078 | 0,68  | 0,190359582 | 0,42  | 0,518216192 |
| Ces1d    | 0,01  | 0,994017749 | -0,06 | 0,974890527 | -0,92 | 0,120781056 | -0,06 | 0,963024916 | 0,39  | 0,624426919 |
| Ces1e    | 0,08  | 0,901200994 | 0,32  | 0,655345408 | -0,16 | 0,877036149 | -0,04 | 0,937855929 | -0,35 | 0,6754671   |
| Ces1f    | 0,15  | 0,850952988 | 0,19  | 0,785244931 | 0,17  | 0,777810365 | 0,08  | 0,895880186 | -0,04 | 0,969957863 |
| Ces1g    | 0,21  | 0,841686611 | 0,21  | 0,891749049 | -0,18 | 0,831275588 | 0,02  | 0,991662365 | -0,17 | 0,900126162 |
| Ces1h    | 0,02  | 0,989017567 | -0,49 | 0,720902851 | -0,44 | 0,602775092 | 0,26  | 0,792166846 | -0,34 | 0,692027506 |
| Ces2a    | 0,26  | 0,808555679 | -0,03 | 0,989873399 | 0,03  | 0,988730227 | 0,53  | 0,715808932 | 0,41  | 0,809010505 |
| Ces2c    | -0,22 | 0,847000357 | 0,62  | 0,694759677 | -0,53 | 0,684002106 | -0,66 | 0,36212016  | 0,36  | 0,745574572 |
| Ces2d-ps | 0,1   | 0,922118639 | -0,12 | 0,907928685 | -0,09 | 0,946777487 | -0,13 | 0,870202269 | 0,03  | 0,974374062 |

|         |       |             |       |             |       |             |       |             |       |             |
|---------|-------|-------------|-------|-------------|-------|-------------|-------|-------------|-------|-------------|
| Ces2e   | -0,25 | 0,808947569 | -0,35 | 0,505971523 | 0,5   | 0,49582632  | -3,87 | 0,006154414 | -1,98 | 0,043498794 |
| Ces2f   | -0,18 | 0,725966386 | 0,17  | 0,840864779 | -0,57 | 0,471873683 | -0,36 | 0,344978832 | -0,07 | 0,954048928 |
| Ces2g   | -0,03 | 0,984040323 | -0,14 | 0,90164068  | -0,2  | 0,712192503 | -4,18 | 0,010016115 | -0,73 | 0,278240482 |
| Ces2h   | -0,2  | 0,837572712 | -0,16 | 0,934602811 | -0,26 | 0,693217111 | 0,11  | 0,904971257 | -0,2  | 0,9039404   |
| Ces3a   | 0,55  | 0,61300824  | 0,21  | 0,609632892 | 0,05  | 0,944266382 | -0,03 | 0,981226068 | -0,16 | 0,876666201 |
| Ces3b   | -0,15 | 0,869946494 | -0,14 | 0,837500541 | -0,05 | 0,965539887 | -0,1  | 0,817536845 | 0,32  | 0,590339443 |
| Ces4a   | -0,42 | 0,509815996 | -0,07 | 0,919659005 | -0,47 | 0,539159914 | 0,1   | 0,894751046 | 0,13  | 0,885318142 |
| Ces5a   | 0,12  | 0,829909995 | 0,09  | 0,891099    | -0,52 | 0,396645431 | 0,13  | 0,799835488 | -0,22 | 0,797575387 |
| Cetn1   | 0,24  | 0,645863119 | 0,12  | 0,889242944 | 0,22  | 0,826608903 | 0,16  | 0,758519001 | -0,04 | 0,963463844 |
| Cetn2   | -0,36 | 0,374444487 | 0,12  | 0,910184435 | 0,24  | 0,633244842 | -0,21 | 0,728067633 | 0,04  | 0,972231257 |
| Cetn3   | 0,01  | 0,988674093 | -0,28 | 0,589698485 | 0,16  | 0,855887253 | -0,18 | 0,703751395 | 0,08  | 0,928671864 |
| Cetn4   | -0,05 | 0,958512892 | 0,3   | 0,75247655  | -0,18 | 0,889818596 | 0,2   | 0,804692486 | 0,28  | 0,788112596 |
| Cfap100 | -0,1  | 0,9231839   | -0,02 | 0,978127539 | -0,87 | 0,068656869 | -0,06 | 0,943143586 | -0,33 | 0,646022757 |
| Cfap126 | 0,17  | 0,761457464 | -0,5  | 0,681619939 | 0,1   | 0,911921787 | 0,12  | 0,879732899 | -0,19 | 0,786813214 |
| Cfap157 | 0,21  | 0,9023969   | 0,7   | 0,654621987 | -0,14 | 0,906161535 | -0,4  | 0,577360837 | -0,01 | 0,993865559 |
| Cfap161 | 0,87  | 0,208776356 | 0     | 1           | -0,36 | 0,501985335 | 0,84  | 0,125274969 | 0,45  | 0,640974834 |
| Cfap20  | -0,3  | 0,679257396 | 0,01  | 0,998766432 | 0,62  | 0,38497941  | 0,78  | 0,299250778 | 0,46  | 0,578525022 |
| Cfap206 | 0,32  | 0,634129153 | -0,46 | 0,559617305 | -0,25 | 0,658477739 | 0,85  | 0,103099267 | 0,88  | 0,358607257 |
| Cfap221 | -0,38 | 0,507090099 | -0,02 | 0,981586987 | -0,12 | 0,885042765 | -0,14 | 0,729857506 | -0,21 | 0,788569233 |
| Cfap36  | -0,49 | 0,455714377 | -0,68 | 0,568187167 | 1,03  | 0,151352948 | 0,07  | 0,959958662 | -0,69 | 0,387681311 |
| Cfap43  | 0,14  | 0,840446684 | 0,16  | 0,805949528 | 0,01  | 0,989815749 | -0,1  | 0,900334233 | -0,29 | 0,774347354 |
| Cfap44  | 0,48  | 0,468111704 | -0,43 | 0,402975324 | 0,02  | 0,990836784 | 0,53  | 0,639359737 | 0,09  | 0,962094947 |
| Cfap45  | -0,65 | 0,318626395 | -0,09 | 0,959673534 | 0,43  | 0,429076113 | 0,11  | 0,864867788 | -0,44 | 0,496993965 |
| Cfap46  | 0,48  | 0,277692472 | 0,03  | 0,971766055 | 0,09  | 0,920124188 | 0,1   | 0,898641987 | 0,14  | 0,866693394 |
| Cfap52  | -0,26 | 0,702313432 | -0,15 | 0,824691053 | 0,02  | 0,98439351  | 0,27  | 0,700431952 | 0,22  | 0,8024387   |
| Cfap53  | 0,18  | 0,687662951 | 0,44  | 0,251942925 | -0,09 | 0,932706021 | -0,14 | 0,769374738 | 0,9   | 0,299525714 |
| Cfap54  | -0,63 | 0,364262409 | 0,09  | 0,928250778 | -0,16 | 0,901410016 | 0,39  | 0,522511755 | -0,52 | 0,391282293 |
| Cfap57  | -0,08 | 0,916851404 | -0,09 | 0,934480412 | -0,02 | 0,977081417 | 0,28  | 0,53353623  | -0,03 | 0,97206128  |
| Cfap58  | 0,03  | 0,959985598 | 0,03  | 0,958545812 | -0,07 | 0,944941478 | 0,5   | 0,163529439 | 0,25  | 0,633381473 |
| Cfap61  | 0,15  | 0,780084058 | -0,24 | 0,829770627 | -0,05 | 0,95204022  | -0,13 | 0,880219912 | -0,57 | 0,251199318 |
| Cfap69  | 2,03  | 0,27627239  | 0,61  | 0,677026666 | -0,22 | 0,904132011 | 1,58  | 0,151254716 | 0,27  | 0,773401088 |
| Cfap70  | 0,52  | 0,378598836 | 0,29  | 0,733174363 | 0     | 0,998757399 | -0,11 | 0,899335603 | 0,16  | 0,861977667 |
| Cfap73  | -0,47 | 0,277692472 | 0,26  | 0,708156013 | 0,1   | 0,906709737 | 0,06  | 0,938209847 | -0,1  | 0,922151079 |
| Cfap74  | 0,64  | 0,342306182 | -0,55 | 0,604589541 | -0,09 | 0,934813979 | 0,3   | 0,732800129 | 0,46  | 0,723883531 |
| Cfap77  | 0,13  | 0,83892072  | -0,04 | 0,956935029 | -0,05 | 0,957111298 | 0,16  | 0,695515516 | -0,04 | 0,966901476 |

|         |       |             |       |             |       |             |       |             |       |             |
|---------|-------|-------------|-------|-------------|-------|-------------|-------|-------------|-------|-------------|
| Cfap97  | -0,16 | 0,876138432 | 0,08  | 0,954502447 | -0,11 | 0,92422034  | -0,56 | 0,172566906 | -0,4  | 0,477148813 |
| Cfap99  | 0     | 0,996401897 | -0,23 | 0,621112051 | -0,72 | 0,132010837 | 0,37  | 0,424096716 | 0,1   | 0,918288793 |
| Cfb     | 1,85  | 0,189684245 | 2,06  | 0,066139582 | -0,88 | 0,211487686 | -0,5  | 0,302103649 | 1,87  | 0,006269121 |
| Cfc1    | 0,07  | 0,94916801  | -0,1  | 0,918694468 | -0,3  | 0,652428196 | -0,04 | 0,961558651 | -0,17 | 0,878816222 |
| Cfd     | -0,04 | 0,949362206 | -0,19 | 0,677048849 | -0,75 | 0,502960136 | -1,97 | 0,022064327 | -1,24 | 0,083902097 |
| Cfdp1   | -0,35 | 0,38910431  | -0,07 | 0,904651548 | 0,31  | 0,579926336 | 0,98  | 0,036226618 | 0,63  | 0,240119674 |
| Cfh     | -0,08 | 0,97159365  | -0,59 | 0,840725934 | 0,44  | 0,836779352 | -3,43 | 0,062418461 | 0,16  | 0,953971867 |
| Cfhr1   | 0,2   | 0,780020938 | 0,33  | 0,399656446 | -0,2  | 0,734181708 | 0,1   | 0,827764222 | 0,34  | 0,542367521 |
| Cfhr2   | -0,08 | 0,898269435 | 0,18  | 0,815791007 | 0,4   | 0,317122702 | 0,2   | 0,750780744 | 0,76  | 0,423057196 |
| Cfhr3   | 0,13  | 0,892086191 | -0,27 | 0,854906955 | -0,13 | 0,887947732 | 0,09  | 0,961558651 | 0,05  | 0,979456872 |
| Cfi     | 0,05  | 0,948926586 | -0,36 | 0,565881295 | 0,15  | 0,830642571 | 0,54  | 0,121193897 | -0,09 | 0,890957032 |
| Cfl1    | -0,32 | 0,48308516  | 0,04  | 0,967833514 | -0,4  | 0,705148589 | 0,3   | 0,663121129 | -0,25 | 0,745134899 |
| Cfl2    | -0,03 | 0,967288782 | -0,03 | 0,988074738 | -0,41 | 0,736837174 | 1,36  | 0,027129047 | 0,63  | 0,272986942 |
| Cflar   | 0,52  | 0,199385316 | 0,73  | 0,189108904 | -0,65 | 0,470538686 | -0,23 | 0,593358679 | 0,42  | 0,417815739 |
| Cfp     | 0,51  | 0,546545311 | -0,18 | 0,881574142 | 0,49  | 0,565822909 | 0,03  | 0,974202611 | 0,26  | 0,705203579 |
| Cftr    | -0,15 | 0,845909731 | -0,19 | 0,897038013 | -0,06 | 0,928664612 | 0,17  | 0,710855553 | -0,09 | 0,912733818 |
| Cga     | -0,18 | 0,850571655 | -0,27 | 0,613780894 | -0,19 | 0,736401647 | -0,08 | 0,873221641 | -0,31 | 0,553575086 |
| Cggbp1  | 0,2   | 0,697923338 | 0,13  | 0,77148563  | 0,17  | 0,778517881 | 0,29  | 0,363991251 | 0,44  | 0,417467686 |
| Cgn     | -0,12 | 0,918758168 | 0,18  | 0,824372931 | 0,05  | 0,967767582 | 0,11  | 0,907514833 | -0,11 | 0,932942034 |
| Cgnl1   | -0,52 | 0,314465089 | -0,14 | 0,862723152 | 0,3   | 0,688590394 | -0,62 | 0,11053945  | -0,35 | 0,574285481 |
| Cgref1  | 0,5   | 0,589546619 | -0,04 | 0,988550087 | 0,56  | 0,539832022 | 0,54  | 0,742706747 | 0,27  | 0,912890826 |
| Cgrf1   | -0,23 | 0,614878886 | -0,33 | 0,667757755 | 0,47  | 0,639976167 | 0,63  | 0,072977347 | 0,13  | 0,859663155 |
| Ch25h   | 0,96  | 0,138092806 | 1,17  | 0,062155833 | -0,64 | 0,364526955 | -0,04 | 0,930116111 | 0,6   | 0,160155445 |
| Chac1   | 0,38  | 0,652091673 | 0,34  | 0,51781999  | -0,48 | 0,500849254 | -0,88 | 0,117584986 | 0,01  | 0,991164361 |
| Chac2   | -0,21 | 0,840515514 | -0,17 | 0,943915456 | 0,56  | 0,628048897 | 0,29  | 0,679377653 | 0,11  | 0,939948423 |
| Chad    | 0,12  | 0,770273483 | -0,01 | 0,997700959 | 0,12  | 0,891011584 | -0,55 | 0,532906357 | -0,29 | 0,778593926 |
| Chadl   | 0,09  | 0,873036861 | -0,16 | 0,77550712  | -0,18 | 0,760667236 | 0,22  | 0,645709367 | 0,14  | 0,860591136 |
| Chaf1a  | -0,72 | 0,235475031 | -1,38 | 0,229092429 | -0,13 | 0,934636205 | 1,49  | 0,05217804  | 0,26  | 0,788112596 |
| Chaf1b  | -1,06 | 0,03062682  | -1,86 | 0,040620931 | 1,9   | 0,116607178 | 0,93  | 0,300354431 | -0,59 | 0,565817768 |
| Champ1  | -0,37 | 0,642385552 | -0,04 | 0,961709816 | -0,86 | 0,174478394 | -0,77 | 0,135271031 | -0,21 | 0,735152891 |
| Chat    | 0     | 0,998769353 | 0,44  | 0,402721992 | -0,25 | 0,643853175 | -0,18 | 0,690664654 | 0,02  | 0,984125319 |
| Chchd1  | 0,08  | 0,869565514 | -0,11 | 0,83095935  | 0,11  | 0,841563482 | 0,68  | 0,134154088 | 0,31  | 0,642726581 |
| Chchd10 | 0,39  | 0,469049834 | 0,17  | 0,827289479 | 0,02  | 0,987356432 | -1,76 | 0,01517378  | -0,34 | 0,567590783 |
| Chchd2  | 0,09  | 0,871386005 | 0,09  | 0,912535732 | 0,09  | 0,888385577 | -0,04 | 0,9324626   | 0,06  | 0,939448119 |
| Chchd3  | -0,16 | 0,698332739 | -0,37 | 0,362188015 | 0,29  | 0,562334029 | 0,45  | 0,270345878 | -0,14 | 0,847312006 |

|        |       |             |       |             |       |             |       |             |       |             |
|--------|-------|-------------|-------|-------------|-------|-------------|-------|-------------|-------|-------------|
| Chchd4 | 0,24  | 0,641357042 | -0,01 | 0,998766432 | -0,11 | 0,880706627 | -0,14 | 0,828955037 | -0,52 | 0,317406361 |
| Chchd5 | -0,32 | 0,67148567  | 0,59  | 0,262600415 | 0,14  | 0,932706021 | -0,34 | 0,66020673  | 0,11  | 0,932268703 |
| Chchd6 | -0,02 | 0,988846353 | -0,29 | 0,589051408 | 0,16  | 0,883537876 | 0,19  | 0,806596364 | -0,23 | 0,801417796 |
| Chchd7 | 0,14  | 0,7930442   | 0,26  | 0,568187167 | 0,44  | 0,474169312 | -0,86 | 0,073275727 | 0,12  | 0,879069474 |
| Chd1   | -0,34 | 0,520667704 | 0,2   | 0,649104789 | -0,28 | 0,616398569 | 0,49  | 0,260231715 | 0,39  | 0,468757397 |
| Chd11  | -0,05 | 0,963378584 | 0,01  | 0,999210601 | 0,4   | 0,544299103 | -0,5  | 0,318097982 | -0,36 | 0,582458273 |
| Chd2   | -0,06 | 0,948926586 | 0,46  | 0,40412633  | 0,13  | 0,903345253 | -0,49 | 0,239185309 | -0,05 | 0,961749007 |
| Chd3   | -0,4  | 0,36631183  | -0,05 | 0,927582737 | 0,35  | 0,625876541 | -0,55 | 0,128716159 | -1,06 | 0,047951856 |
| Chd3os | 0,07  | 0,932061055 | -0,28 | 0,725317689 | -0,27 | 0,604296986 | -0,07 | 0,898605649 | -0,69 | 0,223448488 |
| Chd4   | -0,11 | 0,84900712  | 0     | 1           | 0,25  | 0,699304262 | 0,43  | 0,241597107 | 0,2   | 0,735152891 |
| Chd5   | 0     | 1           | 0,03  | 0,972706967 | -0,45 | 0,676693033 | 0,27  | 0,42749877  | 0,21  | 0,731865047 |
| Chd6   | 0,07  | 0,909232325 | -0,24 | 0,51825831  | 0,09  | 0,914134206 | -0,76 | 0,117584986 | -0,33 | 0,675282484 |
| Chd7   | 0,8   | 0,074890017 | 0,89  | 0,216838547 | -0,6  | 0,436382905 | 1,53  | 0,015894405 | 0,59  | 0,211018037 |
| Chd8   | -0,07 | 0,899359458 | -0,24 | 0,853388981 | 0,06  | 0,976042637 | -0,12 | 0,85301747  | -0,39 | 0,605541773 |
| Chd9   | -0,21 | 0,67806773  | -0,09 | 0,905720769 | 0,21  | 0,84917539  | -0,08 | 0,954177755 | 0,39  | 0,731527639 |
| Chdh   | -0,04 | 0,949931783 | -0,04 | 0,981075015 | -0,29 | 0,59976087  | -0,3  | 0,359060095 | -0,19 | 0,728421515 |
| Chek1  | -0,66 | 0,583196213 | -1,31 | 0,429168189 | 2,21  | 0,109631339 | 2,85  | 0,066945702 | -0,67 | 0,634076489 |
| Chek2  | -0,63 | 0,657124524 | -0,88 | 0,291180284 | 0,06  | 0,955747585 | 1,53  | 0,149560729 | 0,19  | 0,890797922 |
| Cherp  | -0,39 | 0,334831047 | -0,27 | 0,646170664 | 0,32  | 0,46668176  | -0,16 | 0,72670212  | -0,23 | 0,726042963 |
| Chfr   | -0,42 | 0,324617125 | -0,19 | 0,64546616  | -0,16 | 0,806102885 | 0,15  | 0,798441226 | 0,1   | 0,919867638 |
| Chga   | 0,8   | 0,495413345 | 1,98  | 0,094366643 | -0,82 | 0,309075044 | 3,05  | 0,004464713 | -0,52 | 0,344161192 |
| Chgb   | -0,08 | 0,892974912 | -0,33 | 0,688641724 | -0,66 | 0,240735979 | 0,09  | 0,943565161 | -0,24 | 0,777805633 |
| Chia1  | -0,23 | 0,889630959 | -0,49 | 0,509796824 | 0,41  | 0,661747229 | 0,5   | 0,276311334 | 0,15  | 0,85945887  |
| Chic1  | 0,46  | 0,498867514 | 0,23  | 0,832369851 | -0,03 | 0,984536409 | 0,33  | 0,523669806 | 1,27  | 0,292058998 |
| Chic2  | 0,68  | 0,153824107 | 0,34  | 0,35496087  | -0,29 | 0,746570045 | 0,99  | 0,023672934 | 0,66  | 0,122922652 |
| Chid1  | -0,1  | 0,914868427 | 0,06  | 0,948115189 | -0,52 | 0,349885268 | 0,64  | 0,253294027 | -0,37 | 0,623214829 |
| Chil1  | -0,08 | 0,92152721  | -0,14 | 0,862088357 | 0,03  | 0,991240121 | 0,25  | 0,599213254 | 0,23  | 0,738412365 |
| Chil3  | 0,08  | 0,955200574 | -0,07 | 0,906267371 | 0,94  | 0,270419876 | 0,12  | 0,92123654  | 0,31  | 0,813308036 |
| Chil4  | 0,05  | 0,972112267 | -0,17 | 0,870893497 | 0,04  | 0,967154353 | 0,03  | 0,964803155 | -0,21 | 0,73475246  |
| Chil5  | 0,47  | 0,422033372 | 0,34  | 0,65864372  | -0,11 | 0,923350407 | -0,33 | 0,767903174 | 0,19  | 0,912250982 |
| Chil6  | 0,51  | 0,36631183  | -0,14 | 0,938711163 | -0,08 | 0,956340132 | -0,09 | 0,924453604 | -0,01 | 0,995580672 |
| Chit1  | -0,22 | 0,782210841 | -0,08 | 0,92856048  | 0,64  | 0,399470425 | 0,7   | 0,145484102 | 0,27  | 0,721825544 |
| Chka   | -0,07 | 0,944291635 | 0,42  | 0,453958512 | 0,34  | 0,671012215 | -0,53 | 0,344677184 | 0,38  | 0,587915673 |
| Chl1   | 0,4   | 0,493333209 | -0,45 | 0,493391321 | -0,09 | 0,897233315 | 0,37  | 0,586887461 | 0,17  | 0,885872093 |
| Chm    | 0,07  | 0,932531737 | 0,2   | 0,735554037 | 0,15  | 0,838718162 | -0,31 | 0,708578905 | -0,02 | 0,990633766 |

|          |       |             |       |             |       |             |       |             |       |             |
|----------|-------|-------------|-------|-------------|-------|-------------|-------|-------------|-------|-------------|
| Chml     | -0,36 | 0,675221653 | -0,36 | 0,665268677 | 0,95  | 0,267460228 | -0,8  | 0,075762884 | -0,59 | 0,190971132 |
| Chmp1a   | -0,11 | 0,810208393 | 0,33  | 0,399717386 | 0,03  | 0,969476711 | 0,1   | 0,865235962 | -0,13 | 0,885872093 |
| Chmp1b   | 0,21  | 0,600952042 | -0,14 | 0,84059163  | 0,06  | 0,950846671 | -0,14 | 0,848930763 | -0,1  | 0,916173996 |
| Chmp2a   | 0,1   | 0,814888638 | 0,07  | 0,915282997 | -0,11 | 0,86404468  | -0,25 | 0,662848818 | 0,29  | 0,669225529 |
| Chmp2b   | -0,34 | 0,551166082 | -0,33 | 0,706028548 | -0,54 | 0,548599327 | 0,11  | 0,864633859 | 0,03  | 0,974110019 |
| Chmp3    | 0,08  | 0,880122447 | -0,26 | 0,750555245 | -0,38 | 0,715403033 | -0,07 | 0,911817212 | -0,3  | 0,597798947 |
| Chmp4b   | 0,16  | 0,682398233 | 0,2   | 0,732051286 | -0,33 | 0,527929204 | 0,78  | 0,064460736 | 0,93  | 0,047951856 |
| Chmp4c   | -0,1  | 0,892823025 | 0,73  | 0,314703215 | -0,27 | 0,703507806 | 0,17  | 0,727188146 | -0,24 | 0,659388778 |
| Chmp5    | 0,09  | 0,84900712  | 0,02  | 0,981236932 | 0,17  | 0,811669636 | 0,01  | 0,983861729 | 0,23  | 0,730289864 |
| Chmp6    | -0,15 | 0,818240052 | -0,17 | 0,88705129  | 0,36  | 0,509702247 | 0,25  | 0,596173996 | -0,2  | 0,796747526 |
| Chmp7    | -0,05 | 0,936139343 | 0,05  | 0,961642601 | -0,18 | 0,721083003 | -0,06 | 0,92123654  | -0,79 | 0,149951093 |
| Chn1     | -0,49 | 0,421029929 | 0,1   | 0,930542276 | 0,14  | 0,943472333 | 1,73  | 0,012870879 | 0,7   | 0,253650803 |
| Chn1os3  | -0,53 | 0,328303644 | -0,23 | 0,640299669 | 0,39  | 0,627215481 | 0,12  | 0,758539343 | -0,14 | 0,827532593 |
| Chn2     | 0,03  | 0,958188047 | 0,39  | 0,643955364 | -0,62 | 0,611144549 | -1,1  | 0,03032795  | 0,8   | 0,140018656 |
| Chodl    | 0,19  | 0,701230948 | -0,26 | 0,629493333 | -0,12 | 0,870377336 | 0,65  | 0,228754241 | 0,2   | 0,830889529 |
| Chordc1  | 0,54  | 0,462062718 | 0,05  | 0,919762719 | 0,12  | 0,937026965 | 0,04  | 0,968311421 | 0,33  | 0,830813323 |
| Chp1     | -0,2  | 0,630133896 | 0,35  | 0,654719935 | 0,14  | 0,899913569 | 0,32  | 0,617062785 | -0,12 | 0,870854875 |
| Chp2     | -0,15 | 0,884074379 | 0,11  | 0,963118207 | 1,04  | 0,150922892 | -1,28 | 0,17421446  | -0,35 | 0,879694124 |
| Chpf     | 0,16  | 0,764057486 | -0,02 | 0,993789602 | 0,23  | 0,82622365  | -0,66 | 0,110493709 | 0,08  | 0,940092696 |
| Chpf2    | -0,34 | 0,464543995 | -0,26 | 0,654621987 | 0,75  | 0,270313252 | 0,92  | 0,086452922 | -0,13 | 0,866693394 |
| Chpt1    | -0,51 | 0,341984772 | -0,45 | 0,5451985   | 0,75  | 0,397772487 | -1,98 | 0,018041423 | -0,45 | 0,505443252 |
| Chrac1   | -0,03 | 0,965991176 | -0,06 | 0,940046211 | -0,33 | 0,595253534 | 0,23  | 0,654230107 | 0,16  | 0,848977077 |
| Chrd     | 0,5   | 0,40477934  | 0,05  | 0,943915456 | -0,33 | 0,543696688 | 0,4   | 0,232695925 | 0,3   | 0,772746418 |
| Chrdl1   | 0,39  | 0,489008935 | -0,42 | 0,567348676 | 0,02  | 0,988395474 | 0,26  | 0,664435324 | 0,07  | 0,949544475 |
| Chrdl2   | 0,07  | 0,888840601 | 0,17  | 0,883339921 | -0,36 | 0,47647024  | 0,05  | 0,952409831 | -0,18 | 0,832736649 |
| Chrm1    | 0,39  | 0,489042022 | 0,4   | 0,517288934 | -0,19 | 0,820886854 | 0,22  | 0,682210385 | -0,03 | 0,97425848  |
| Chrm2    | -0,33 | 0,532948347 | 0,21  | 0,76677473  | 0,15  | 0,890249935 | -0,6  | 0,192208553 | -0,24 | 0,794840052 |
| Chrm3    | -0,19 | 0,733257266 | -0,17 | 0,705845461 | -0,12 | 0,950846671 | -4,17 | 0,009073953 | -0,68 | 0,457841521 |
| Chrm4    | 0,07  | 0,931340184 | 0,07  | 0,928824349 | 0,63  | 0,186321498 | 0,25  | 0,482483122 | -0,15 | 0,844842508 |
| Chrm5    | -0,01 | 0,990717834 | -0,24 | 0,797064865 | -0,01 | 0,99407001  | -0,12 | 0,867836735 | -0,22 | 0,712793529 |
| Chrna1   | 0,21  | 0,869565514 | -0,98 | 0,538124718 | -0,2  | 0,85952125  | 0,94  | 0,285133875 | -0,18 | 0,830077903 |
| Chrna10  | 0,04  | 0,969010989 | -0,06 | 0,900801202 | -0,1  | 0,899941244 | 0,14  | 0,749835708 | 0,22  | 0,710368081 |
| Chrna1os | -1    | 0,40518471  | 0,68  | 0,311904351 | 0,85  | 0,624057916 | 0,79  | 0,439173785 | -0,72 | 0,504009987 |
| Chrna2   | 0,05  | 0,950837484 | 0,29  | 0,828818891 | 0,19  | 0,846296601 | -0,43 | 0,487788893 | -0,03 | 0,979456872 |
| Chrna3   | 0,1   | 0,896152991 | -0,09 | 0,915751439 | -0,24 | 0,715497532 | 0,09  | 0,883821307 | 0,08  | 0,928724353 |

|        |       |             |       |             |       |             |       |             |       |             |
|--------|-------|-------------|-------|-------------|-------|-------------|-------|-------------|-------|-------------|
| Chrna4 | 0,19  | 0,736648392 | 0,41  | 0,698123092 | -0,22 | 0,776071062 | -0,64 | 0,69151142  | -0,44 | 0,800540569 |
| Chrna5 | -0,12 | 0,930710746 | 0,25  | 0,642775877 | -0,47 | 0,437315481 | -0,08 | 0,947551542 | 0,45  | 0,587305934 |
| Chrna6 | -0,39 | 0,575887113 | -0,16 | 0,825662099 | -0,41 | 0,628048897 | 0,22  | 0,605823496 | 0,52  | 0,460621168 |
| Chrna7 | 0,27  | 0,720829271 | 0,06  | 0,944306982 | 0,41  | 0,373051052 | -0,71 | 0,15935962  | -0,5  | 0,429206436 |
| Chrna9 | 0,07  | 0,923532124 | -0,23 | 0,728434379 | 0,08  | 0,906709737 | -0,15 | 0,76898268  | -0,19 | 0,818974537 |
| Chrb1  | 0,13  | 0,907748757 | 0,63  | 0,267378853 | -0,53 | 0,462643491 | 0,35  | 0,790298453 | 0,92  | 0,38669303  |
| Chrb2  | -0,24 | 0,865776054 | 0,31  | 0,643955364 | -0,35 | 0,777918093 | -0,18 | 0,768880868 | 0,34  | 0,676744294 |
| Chrb3  | 0,21  | 0,811419663 | 0,36  | 0,786394409 | -0,58 | 0,309053396 | -0,17 | 0,850199995 | -0,03 | 0,982175252 |
| Chrb4  | 0,43  | 0,326487083 | 0,39  | 0,450322524 | 0,16  | 0,849027937 | -0,13 | 0,905282867 | -0,15 | 0,912733818 |
| Chrnd  | 0     | 0,996998625 | -0,11 | 0,956502806 | 0,2   | 0,841563482 | -0,32 | 0,483554745 | -0,12 | 0,93992804  |
| Chrne  | -0,35 | 0,348729432 | 0,05  | 0,973945454 | 0     | 0,998479176 | 0,02  | 0,991962381 | -0,27 | 0,814438115 |
| Chrng  | -0,11 | 0,892124736 | -0,03 | 0,970540424 | -0,09 | 0,91821779  | 0,07  | 0,882538459 | 0,4   | 0,42343154  |
| Chst1  | -0,63 | 0,172698611 | -0,34 | 0,545116169 | 0,74  | 0,146733367 | 4,45  | 0,004264722 | -0,38 | 0,684349871 |
| Chst10 | -0,09 | 0,90269029  | -0,03 | 0,967338233 | 0,07  | 0,941254389 | -0,07 | 0,86946471  | 0,1   | 0,900126162 |
| Chst11 | 0,05  | 0,944969851 | 0,05  | 0,932292974 | 0,75  | 0,15883036  | 0,01  | 0,992833806 | -0,41 | 0,471726692 |
| Chst12 | -0,37 | 0,475761281 | -0,86 | 0,256154202 | 0,24  | 0,732349449 | 0,25  | 0,564693464 | -0,92 | 0,122922652 |
| Chst13 | 0,13  | 0,756942192 | -0,09 | 0,898952381 | -0,01 | 0,994899035 | 0,28  | 0,624318273 | -0,03 | 0,979152939 |
| Chst14 | -0,69 | 0,203168309 | 0,02  | 0,989873399 | -0,13 | 0,876684089 | -0,29 | 0,560311751 | -0,27 | 0,706246121 |
| Chst15 | 0,08  | 0,895087252 | -0,26 | 0,619756114 | -0,18 | 0,841669036 | -0,96 | 0,074454367 | -0,85 | 0,136921503 |
| Chst2  | -0,19 | 0,684541418 | -0,26 | 0,680709276 | 0,04  | 0,982305856 | -0,52 | 0,400009017 | -0,89 | 0,187022034 |
| Chst3  | -0,64 | 0,202613112 | -0,18 | 0,826165513 | -0,11 | 0,892881818 | 0,05  | 0,957596559 | 0,12  | 0,930287169 |
| Chst4  | 0,03  | 0,97114796  | 0,36  | 0,656542439 | 0,63  | 0,418405756 | 0,22  | 0,534825895 | 0,31  | 0,602231893 |
| Chst5  | 0,07  | 0,883644335 | 0,16  | 0,732847182 | -0,17 | 0,806102885 | -0,07 | 0,8556361   | 0,09  | 0,901479265 |
| Chst7  | -0,45 | 0,209394429 | -0,17 | 0,818871477 | 0,31  | 0,711793051 | 1,13  | 0,086968945 | -0,2  | 0,74324214  |
| Chst8  | 0,16  | 0,833900133 | 0,11  | 0,809683705 | 0,05  | 0,956229354 | -2,43 | 0,003907268 | -1,35 | 0,01166388  |
| Chst9  | 0     | 0,998017023 | 0,13  | 0,854580121 | 0,15  | 0,902672106 | 0,23  | 0,628879523 | -0,02 | 0,985714059 |
| Chsy1  | -0,1  | 0,843661553 | 0,23  | 0,728434379 | 0,42  | 0,38575085  | 0,69  | 0,224135088 | -0,18 | 0,835191    |
| Chsy3  | -0,15 | 0,807246565 | -0,32 | 0,556926763 | 0,17  | 0,83900004  | -0,41 | 0,437505539 | -0,33 | 0,566248044 |
| Chtf18 | -0,45 | 0,441176207 | -1,01 | 0,145787722 | 0,53  | 0,57717258  | 1,2   | 0,024698552 | -0,17 | 0,82823489  |
| Chtf8  | -0,06 | 0,957820843 | -0,19 | 0,766425161 | 0,27  | 0,720069267 | -0,1  | 0,791994439 | -0,33 | 0,551239623 |
| Chtop  | -0,07 | 0,919168566 | 0,02  | 0,970832543 | 0,5   | 0,368620918 | -0,32 | 0,338782451 | 0,04  | 0,956013361 |
| Chuk   | 0,11  | 0,89081819  | 0,47  | 0,337618435 | -0,32 | 0,777918093 | -0,43 | 0,560311751 | 0,98  | 0,220159635 |
| Churc1 | -0,44 | 0,279793863 | 0     | 1           | 0,94  | 0,190867064 | -0,53 | 0,473075261 | -0,02 | 0,982175252 |
| Ciao1  | -0,06 | 0,946082673 | -0,35 | 0,410501758 | 0,85  | 0,402679175 | 0,25  | 0,705754144 | -0,12 | 0,911850421 |
| Ciapi1 | -0,51 | 0,351718017 | -0,37 | 0,619025787 | 1,28  | 0,413289204 | -0,19 | 0,74076763  | -0,82 | 0,40189401  |



|          |       |             |       |             |       |             |       |             |       |             |
|----------|-------|-------------|-------|-------------|-------|-------------|-------|-------------|-------|-------------|
| Ciart    | -0,23 | 0,862542626 | 0,39  | 0,527287574 | 0,37  | 0,426442479 | -0,14 | 0,929835301 | -0,12 | 0,943668392 |
| Cib1     | -0,13 | 0,808379727 | -0,06 | 0,916255958 | 0,51  | 0,370554673 | 0,48  | 0,288067607 | 0,02  | 0,98653183  |
| Cib2     | -0,5  | 0,298725818 | 0,22  | 0,706671369 | -0,1  | 0,950846671 | -0,53 | 0,216560476 | 0,32  | 0,511300791 |
| Cib3     | -0,1  | 0,853594835 | 0,18  | 0,767178812 | -0,05 | 0,9617386   | -0,24 | 0,55776895  | -0,2  | 0,853880519 |
| Cib4     | 0,49  | 0,507090099 | 0,22  | 0,785573503 | -0,48 | 0,56948206  | 0,35  | 0,673428333 | 0,11  | 0,937558003 |
| Cic      | 0     | 0,998017023 | 0,27  | 0,656294004 | 0,04  | 0,968008918 | -1    | 0,045030572 | -0,26 | 0,706246121 |
| Cidea    | -0,07 | 0,943079514 | 0,01  | 0,997700959 | 0     | 0,998479176 | 0,12  | 0,920036779 | 0,27  | 0,765342998 |
| Cideb    | 0,49  | 0,59710379  | 0,43  | 0,642545909 | 0,12  | 0,917732371 | 0,01  | 0,995663642 | 0,75  | 0,442205165 |
| Cidec    | -0,04 | 0,972736855 | 0,05  | 0,949561659 | -0,2  | 0,911921787 | 0,05  | 0,983061756 | -0,24 | 0,890833196 |
| Ciita    | 1,36  | 0,156998083 | 2,15  | 0,040620931 | -1,73 | 0,037381207 | -0,2  | 0,900285116 | 3,49  | 0,01012797  |
| Cilp     | 0,16  | 0,937444361 | 0,03  | 0,990715557 | 0,33  | 0,807786405 | -0,36 | 0,614742582 | -0,03 | 0,989016067 |
| Cilp2    | 0,39  | 0,528122544 | -0,08 | 0,919602924 | 0,06  | 0,949553487 | -0,02 | 0,982985345 | -0,22 | 0,75509516  |
| Cinp     | -0,43 | 0,499007529 | -0,45 | 0,362922012 | -0,28 | 0,756336225 | 0,66  | 0,315958307 | -0,01 | 0,996506997 |
| Cipc     | -0,33 | 0,611940588 | 0,15  | 0,879693148 | -0,43 | 0,544136059 | -0,35 | 0,56246056  | -0,49 | 0,533508421 |
| Cir1     | 0,26  | 0,596550801 | 0,3   | 0,813731769 | -0,14 | 0,938291859 | -0,98 | 0,104613149 | -0,47 | 0,459584226 |
| Cirbp    | -0,98 | 0,133476163 | 0,18  | 0,912604822 | 0,24  | 0,702677589 | -1,54 | 0,065441734 | -0,69 | 0,290442698 |
| Cirh1a   | -0,18 | 0,764957267 | -0,08 | 0,919762719 | 0,6   | 0,696714354 | 0,39  | 0,424025922 | -0,09 | 0,924447831 |
| Cisd1    | -0,41 | 0,576009654 | -0,23 | 0,73408402  | 0,48  | 0,423586474 | 0,23  | 0,779547737 | -0,09 | 0,958856121 |
| Cisd2    | -0,11 | 0,902516935 | -0,04 | 0,968420598 | 0,07  | 0,949912807 | 0,96  | 0,091733474 | 0,16  | 0,904040121 |
| Cisd3    | 0,09  | 0,88700256  | 0,17  | 0,781212218 | -0,14 | 0,875089034 | 0,17  | 0,626884812 | 0,2   | 0,726563756 |
| Cish     | 1,64  | 0,049493804 | 1,36  | 0,152199284 | -0,32 | 0,757498725 | -0,93 | 0,166447691 | 0,12  | 0,890957032 |
| Cit      | -0,95 | 0,212230215 | -0,98 | 0,181636532 | 0,89  | 0,145335521 | 0,99  | 0,129539574 | -0,47 | 0,432621109 |
| Cited1   | -0,06 | 0,957277205 | -0,04 | 0,966078321 | -0,24 | 0,732540375 | 0,01  | 0,985897275 | -0,56 | 0,451978873 |
| Cited2   | 0,56  | 0,219672614 | 0,62  | 0,363919957 | 0,2   | 0,828424248 | -0,04 | 0,937633191 | 0,45  | 0,541434584 |
| Cited4   | 0,07  | 0,948926586 | 0,29  | 0,747728608 | -0,28 | 0,695306228 | 0,07  | 0,957551021 | 0,39  | 0,603475681 |
| Ciz1     | 0,17  | 0,824551293 | 0,26  | 0,518494408 | -0,33 | 0,699337799 | -0,49 | 0,176055978 | -0,05 | 0,952190189 |
| CK137956 | 0,27  | 0,707480624 | -0,15 | 0,839789639 | -0,31 | 0,605650778 | -0,01 | 0,996287679 | 0,26  | 0,792305774 |
| Ckap2    | -0,43 | 0,517149278 | -0,24 | 0,819651816 | 0,6   | 0,436827113 | 0,98  | 0,110657093 | -0,65 | 0,195453656 |
| Ckap2l   | -0,26 | 0,840882072 | -0,66 | 0,644516897 | -0,08 | 0,952888594 | 0,64  | 0,561656192 | -0,07 | 0,945291688 |
| Ckap4    | -0,71 | 0,149941264 | -0,76 | 0,213731156 | 0,67  | 0,1819518   | 2,37  | 0,059079504 | 0,07  | 0,969617491 |
| Ckap5    | -0,73 | 0,229301605 | -0,31 | 0,602956592 | -0,04 | 0,957114647 | 0,29  | 0,571112223 | -0,17 | 0,819072786 |
| Ckb      | -0,69 | 0,259993571 | -0,64 | 0,370805218 | -0,05 | 0,976901738 | -0,7  | 0,203580306 | -0,06 | 0,950267521 |
| Cklf     | 0,03  | 0,975506993 | -0,41 | 0,56006264  | -0,05 | 0,957327097 | 0,72  | 0,170353959 | -0,11 | 0,903153151 |
| Ckm      | 0,35  | 0,617087012 | 0     | 1           | -0,24 | 0,757498725 | 0,26  | 0,628399455 | -0,06 | 0,952141995 |
| Ckmt1    | 0,14  | 0,895871179 | 0,3   | 0,766425161 | -0,12 | 0,890039178 | -0,38 | 0,742500851 | -0,25 | 0,876418697 |

|           |       |             |       |             |       |             |       |             |       |             |
|-----------|-------|-------------|-------|-------------|-------|-------------|-------|-------------|-------|-------------|
| Ckmt2     | -0,17 | 0,778869381 | -0,63 | 0,300191093 | -0,5  | 0,352115066 | -0,02 | 0,970931237 | -0,43 | 0,504660722 |
| Cks1brt   | 0,23  | 0,608455671 | 0,05  | 0,947088835 | 0,09  | 0,943788892 | 0,22  | 0,604127556 | 0,21  | 0,720440621 |
| Cks2      | -0,55 | 0,597954095 | -0,24 | 0,855607772 | 0,88  | 0,374983905 | 2,32  | 0,023328447 | 0,25  | 0,748818464 |
| Clasp1    | 0,05  | 0,960887583 | 0,21  | 0,745921616 | 0,11  | 0,8685347   | 0,28  | 0,704798975 | 0,12  | 0,912250982 |
| Clasp2    | 0,07  | 0,955200574 | 0,24  | 0,738647756 | -0,34 | 0,465949919 | 0,08  | 0,920158794 | 0     | 0,999733463 |
| Clasrp    | 0,25  | 0,702017115 | -0,27 | 0,673542391 | 0,37  | 0,743900482 | 0,21  | 0,511044878 | 0,05  | 0,961406182 |
| Clca1     | 0,49  | 0,199385316 | 0,22  | 0,742043497 | -0,15 | 0,82162081  | 0,04  | 0,951697927 | 0,32  | 0,606912008 |
| Clca2     | 0,11  | 0,829070578 | 0,08  | 0,929289366 | 0,2   | 0,811669636 | 4,18  | 0,009534917 | 0,44  | 0,78298775  |
| Clca3a1   | 0,79  | 0,421029929 | 1,71  | 0,234467132 | -1,38 | 0,281101415 | 0,39  | 0,74128357  | 0,57  | 0,689780577 |
| Clca3a2   | -0,1  | 0,949236157 | -0,64 | 0,609903902 | -0,53 | 0,823396412 | 0,38  | 0,81444362  | -1,68 | 0,137167994 |
| Clca3b    | -0,39 | 0,496123406 | 0,29  | 0,895094282 | -0,38 | 0,76722578  | -0,29 | 0,829591443 | -0,4  | 0,777223566 |
| Clca4a    | 0,37  | 0,363807064 | 0,41  | 0,677128722 | 0,49  | 0,402460828 | -0,63 | 0,286823287 | -0,13 | 0,915067495 |
| Clca4b    | 0,09  | 0,933912196 | -0,24 | 0,847821325 | -0,02 | 0,993379272 | 0,09  | 0,876895238 | -0,17 | 0,78512653  |
| Clca4c-ps | 0,15  | 0,85515494  | -0,21 | 0,77325041  | -0,14 | 0,876684089 | -0,66 | 0,121231601 | -0,68 | 0,290271291 |
| Clcc1     | 0     | 0,998385918 | -0,06 | 0,965206586 | 0,71  | 0,264621497 | -0,38 | 0,518223215 | -0,11 | 0,932846086 |
| Clcf1     | -0,33 | 0,6698994   | -0,62 | 0,368799475 | 0,57  | 0,36121902  | 0,09  | 0,869497105 | 0,29  | 0,652073004 |
| Clcn1     | -0,34 | 0,62279387  | 0,2   | 0,783677427 | 0,38  | 0,744387748 | 0,02  | 0,983026977 | -0,48 | 0,431085955 |
| Clcn2     | -0,14 | 0,856887426 | 0,36  | 0,583513521 | 0     | 0,997779809 | -0,53 | 0,200972441 | -0,54 | 0,298559636 |
| Clcn3     | -0,64 | 0,390360486 | -0,35 | 0,882589938 | 0,35  | 0,674349954 | 0,62  | 0,368853364 | 0,58  | 0,354557431 |
| Clcn4     | -0,25 | 0,755279455 | 0,47  | 0,544380607 | 0,33  | 0,546308107 | -1,01 | 0,120131537 | -0,49 | 0,443067005 |
| Clcn5     | -0,77 | 0,17366966  | 0,06  | 0,985413376 | 1,13  | 0,240110915 | 1,23  | 0,249385388 | 0,17  | 0,919473904 |
| Clcn6     | 0,01  | 0,991919022 | 0,22  | 0,765180904 | 0,15  | 0,887630371 | -1,17 | 0,078822979 | 0,07  | 0,948163009 |
| Clcn7     | 0,63  | 0,200967908 | 0,52  | 0,509013394 | -0,35 | 0,600024457 | -0,35 | 0,715825968 | 0,29  | 0,77959286  |
| Clcnka    | -0,06 | 0,922091919 | -0,13 | 0,907928685 | 0,19  | 0,75990504  | -0,18 | 0,866760121 | -0,42 | 0,694233384 |
| Clcnkb    | 0,14  | 0,832947001 | 0,24  | 0,664787536 | 0,28  | 0,684883663 | -1,84 | 0,025644889 | -1,8  | 0,015349051 |
| Cldn1     | 0,47  | 0,460231397 | 0,14  | 0,893262563 | 0     | 0,997394645 | -0,21 | 0,737710335 | -0,24 | 0,68987325  |
| Cldn10    | -0,04 | 0,9489566   | 0,27  | 0,624860312 | -0,15 | 0,804910036 | -2,8  | 0,021262879 | -0,49 | 0,604611676 |
| Cldn11    | 0,41  | 0,481799453 | 0,4   | 0,6416563   | 0,19  | 0,800493831 | -0,59 | 0,226363316 | -0,28 | 0,827032122 |
| Cldn12    | 0,35  | 0,428465662 | 0,94  | 0,17844863  | -0,05 | 0,968742139 | -0,65 | 0,394383519 | -0,07 | 0,968130547 |
| Cldn13    | 0,27  | 0,698889628 | 0,11  | 0,898238238 | 0,34  | 0,549446867 | -0,07 | 0,944769683 | -0,12 | 0,926008345 |
| Cldn14    | -0,01 | 0,986795639 | -0,19 | 0,664787536 | -0,18 | 0,791940256 | -0,18 | 0,740509226 | 0,01  | 0,99476381  |
| Cldn15    | -0,21 | 0,886889675 | -0,41 | 0,529912287 | 0,11  | 0,944441051 | -2,2  | 0,007738248 | -0,24 | 0,733488478 |
| Cldn16    | 0,1   | 0,878384628 | -0,08 | 0,918400751 | 0,35  | 0,516630451 | -0,18 | 0,596553698 | 0,46  | 0,834332046 |
| Cldn17    | -0,25 | 0,658266451 | -0,54 | 0,383504117 | 0,08  | 0,914965671 | 0,37  | 0,325202655 | 0,2   | 0,770148689 |
| Cldn18    | 0,1   | 0,913425276 | -0,13 | 0,892260328 | -0,45 | 0,465949919 | -0,56 | 0,35511395  | -0,16 | 0,829280005 |

|           |       |             |       |             |       |             |       |             |       |             |
|-----------|-------|-------------|-------|-------------|-------|-------------|-------|-------------|-------|-------------|
| Cldn19    | -0,38 | 0,596345622 | -0,2  | 0,733708652 | 0,25  | 0,789981877 | 0,12  | 0,845767749 | 0,3   | 0,583279373 |
| Cldn2     | 0,19  | 0,751534367 | 0,02  | 0,994802028 | -0,08 | 0,945572696 | -0,6  | 0,433359421 | -0,04 | 0,977212067 |
| Cldn20    | 0,05  | 0,923180948 | -0,08 | 0,926178529 | 0,03  | 0,986063579 | 0,05  | 0,972656417 | -0,09 | 0,946133906 |
| Cldn22    | 0,2   | 0,589647393 | 0,02  | 0,978528738 | -0,48 | 0,479660236 | 0,12  | 0,754339703 | 0,33  | 0,574285481 |
| Cldn23    | 0,04  | 0,96263856  | -0,01 | 0,994161588 | 0,26  | 0,710867223 | 0,09  | 0,818711104 | 0,22  | 0,728867732 |
| Cldn24    | -0,15 | 0,768809729 | 0,02  | 0,979002922 | 0,01  | 0,989336214 | -0,01 | 0,983166423 | -0,02 | 0,980961333 |
| Cldn3     | 0,28  | 0,764288636 | -0,11 | 0,824916914 | 0,37  | 0,688643408 | 0,34  | 0,560223278 | 0,21  | 0,853225105 |
| Cldn34a   | 0,1   | 0,834672627 | 0,09  | 0,863359785 | -0,57 | 0,246580815 | 0     | 0,997771107 | 0,05  | 0,947559952 |
| Cldn34b1  | 0,17  | 0,896036407 | -0,6  | 0,436759792 | -0,03 | 0,963357998 | 0,62  | 0,390823877 | 0,1   | 0,933064949 |
| Cldn34b2  | 0,18  | 0,761364679 | -0,3  | 0,643895096 | -0,3  | 0,709222239 | 0,22  | 0,533498808 | 0,23  | 0,726042963 |
| Cldn34b3  | -0,53 | 0,2687193   | 0,58  | 0,583200444 | 0,13  | 0,830336321 | -0,05 | 0,909697685 | 0,35  | 0,629481302 |
| Cldn34b4  | 0,27  | 0,61379872  | 0,12  | 0,785153081 | -0,09 | 0,914354795 | -0,29 | 0,686374896 | -0,04 | 0,973861565 |
| Cldn34c1  | -0,38 | 0,503332622 | 0,41  | 0,655302559 | 0,27  | 0,760679785 | -0,53 | 0,742291133 | -0,26 | 0,900126162 |
| Cldn34c4  | -0,1  | 0,847913893 | 0,18  | 0,828219939 | -0,17 | 0,726640095 | -0,19 | 0,663121129 | 0,1   | 0,879344311 |
| Cldn34d   | 0,2   | 0,676800971 | 0,02  | 0,977731064 | -0,12 | 0,875089034 | -0,08 | 0,897526705 | -0,11 | 0,885777129 |
| Cldn34-ps | 0,88  | 0,663119768 | -0,11 | 0,854999866 | -0,03 | 0,963115643 | 0,01  | 0,976405026 | -0,18 | 0,746065878 |
| Cldn4     | 0,91  | 0,214430522 | 0,68  | 0,594415097 | 0,6   | 0,402409115 | -0,35 | 0,380029536 | -0,19 | 0,791583632 |
| Cldn5     | -0,21 | 0,607403582 | -0,05 | 0,956049982 | -0,12 | 0,86459621  | -0,12 | 0,852423181 | -0,65 | 0,289817815 |
| Cldn6     | -0,02 | 0,972701787 | 0,07  | 0,897574732 | 0,72  | 0,144873701 | 0,26  | 0,577278073 | 0,55  | 0,24120873  |
| Cldn7     | 0,46  | 0,316599006 | -0,35 | 0,703923817 | 0,21  | 0,784734693 | -0,15 | 0,912225028 | -1,19 | 0,274394155 |
| Cldn8     | -0,2  | 0,673291416 | 0,11  | 0,86297915  | 0     | 0,999931921 | -0,24 | 0,780675133 | -0,5  | 0,456327568 |
| Cldn9     | 0,04  | 0,953242941 | 0,25  | 0,664787536 | 0,21  | 0,775163644 | 0,17  | 0,77038356  | 0,52  | 0,475565953 |
| Cldnd1    | 0,13  | 0,757032046 | 0,12  | 0,786394409 | 0,24  | 0,592779276 | 0,1   | 0,799699845 | -0,2  | 0,728483022 |
| Cldnd2    | -0,32 | 0,479545376 | 0,42  | 0,606605405 | -0,46 | 0,549895527 | 0,25  | 0,853864817 | 0,21  | 0,884640084 |
| Clec10a   | 0,03  | 0,983663467 | -0,5  | 0,693906911 | 0,04  | 0,978840171 | 0,31  | 0,825017636 | -0,49 | 0,712477758 |
| Clec11a   | 0,23  | 0,680520303 | -0,17 | 0,772270394 | -0,24 | 0,666305832 | -0,81 | 0,103099267 | -0,09 | 0,916435906 |
| Clec12a   | 0,32  | 0,696026916 | 0,45  | 0,811927268 | 0,2   | 0,846591983 | 0,21  | 0,637976973 | -0,19 | 0,8024387   |
| Clec12b   | 0,59  | 0,631688937 | -0,42 | 0,827468312 | 0,68  | 0,192747337 | -0,96 | 0,391807778 | -0,03 | 0,983886537 |
| Clec14a   | -0,81 | 0,112137562 | -0,2  | 0,732847182 | 0,61  | 0,538676107 | -1,83 | 0,009316702 | -0,35 | 0,536947853 |
| Clec16a   | 0,35  | 0,503788174 | 0,24  | 0,754479452 | 0,18  | 0,778653031 | -0,27 | 0,521014027 | 0,02  | 0,983617617 |
| Clec18a   | -0,24 | 0,593510013 | -0,2  | 0,794404033 | -0,33 | 0,645229485 | -0,06 | 0,929835301 | -0,05 | 0,95985938  |
| Clec1a    | -0,01 | 0,991919022 | -0,05 | 0,928974649 | 0,41  | 0,481504499 | -0,41 | 0,561656192 | -0,43 | 0,551239623 |
| Clec1b    | 0,03  | 0,964021881 | 2,31  | 0,297721516 | 1,26  | 0,293036801 | -1,05 | 0,500808967 | 0,05  | 0,980945466 |
| Clec2d    | 1,68  | 0,03062682  | 0,83  | 0,109267475 | -1,14 | 0,295720005 | -1,57 | 0,018610251 | 0,74  | 0,155132084 |
| Clec2e    | -0,73 | 0,289889876 | 0,43  | 0,495742596 | -0,14 | 0,937802036 | 2,24  | 0,034171201 | 0,4   | 0,699060093 |

|         |       |             |       |             |       |             |       |             |       |             |
|---------|-------|-------------|-------|-------------|-------|-------------|-------|-------------|-------|-------------|
| Clec2g  | -0,26 | 0,839118329 | -0,03 | 0,979551751 | -0,1  | 0,921119153 | -0,11 | 0,864951671 | 0,4   | 0,436967007 |
| Clec2h  | 0,31  | 0,612107783 | -0,22 | 0,86297915  | -0,35 | 0,473574592 | -0,04 | 0,957276819 | -0,21 | 0,884321797 |
| Clec2i  | -0,46 | 0,256718201 | 1,03  | 0,668839557 | -0,39 | 0,684002106 | -0,56 | 0,490835105 | 0,51  | 0,565598886 |
| Clec2l  | -0,09 | 0,905289789 | 0,14  | 0,868234125 | 0,17  | 0,789396261 | 0,05  | 0,943846121 | 0,78  | 0,149879896 |
| Clec3a  | -0,19 | 0,69801847  | -0,3  | 0,725904452 | -0,09 | 0,946845275 | -0,09 | 0,902632056 | 0,27  | 0,677222415 |
| Clec3b  | -0,05 | 0,958512892 | -0,19 | 0,709432782 | -0,18 | 0,808065828 | 0,14  | 0,783708375 | 0,15  | 0,823098095 |
| Clec4a1 | 0,24  | 0,747663533 | 0,28  | 0,816121519 | 0,01  | 0,992919703 | 0,25  | 0,767012515 | 0     | 0,997769477 |
| Clec4a2 | -0,04 | 0,973545171 | -0,02 | 0,989873399 | -0,31 | 0,73657347  | 0,18  | 0,825342232 | 0,33  | 0,835786084 |
| Clec4a3 | 0,11  | 0,914782555 | -0,05 | 0,932429589 | 0,01  | 0,996397104 | 0,36  | 0,665234661 | 0,2   | 0,816940286 |
| Clec4a4 | 0,47  | 0,53293469  | 0,2   | 0,831647298 | 0,07  | 0,941627748 | -0,21 | 0,602240167 | -0,01 | 0,991628025 |
| Clec4b1 | -0,02 | 0,975058635 | -0,09 | 0,936792848 | 0,03  | 0,969247498 | 0,31  | 0,382751556 | 0,45  | 0,415882968 |
| Clec4b2 | 0,61  | 0,208520513 | 0,17  | 0,952745407 | -0,3  | 0,796952474 | -0,02 | 0,979516321 | 0,47  | 0,445849764 |
| Clec4d  | 0,22  | 0,677867423 | -0,32 | 0,565881295 | 0,26  | 0,926399742 | 0,03  | 0,967866794 | 0,38  | 0,649665709 |
| Clec4e  | -0,62 | 0,593540946 | 0,5   | 0,534012937 | 0,33  | 0,914522109 | -0,42 | 0,346362753 | 0,55  | 0,50404638  |
| Clec4f  | 0,05  | 0,969016153 | -0,14 | 0,833938105 | -0,15 | 0,928438649 | 0,05  | 0,923403061 | -0,18 | 0,801987865 |
| Clec4g  | 0,11  | 0,871580532 | -0,54 | 0,493580894 | -0,61 | 0,219362501 | -0,58 | 0,807661309 | -0,29 | 0,958361114 |
| Clec4n  | -0,11 | 0,928246602 | 0,33  | 0,855632384 | 0,66  | 0,638358093 | 0,8   | 0,204332864 | 0,55  | 0,215131944 |
| Clec5a  | 0,08  | 0,915624801 | -0,03 | 0,96497149  | 0,62  | 0,554535106 | -0,01 | 0,993848515 | 0,2   | 0,712968816 |
| Clec7a  | 0,44  | 0,752654071 | -0,36 | 0,812664394 | -0,46 | 0,769826123 | 0,46  | 0,654230107 | 1,29  | 0,347427589 |
| Clec9a  | 0,1   | 0,873439144 | 0,36  | 0,589051408 | 0,02  | 0,976098568 | 0,38  | 0,470236257 | 0,22  | 0,846573391 |
| Clgn    | -0,16 | 0,770273483 | -0,14 | 0,801259805 | -0,9  | 0,174005427 | 0,09  | 0,817972323 | 0,56  | 0,297874265 |
| Clhc1   | -0,23 | 0,752211185 | -0,19 | 0,82736164  | 0     | 0,999931921 | 0,06  | 0,982613682 | -0,33 | 0,869683708 |
| Clc1    | 0,08  | 0,867025523 | -0,03 | 0,954351313 | -0,03 | 0,963882415 | 0,82  | 0,038935822 | 0,32  | 0,518659138 |
| Clc3    | 0,03  | 0,973545171 | 0,06  | 0,938711163 | 0     | 0,997394645 | -0,07 | 0,923775458 | -0,61 | 0,349150128 |
| Clc4    | 0,2   | 0,61660035  | 0,32  | 0,545692353 | -0,35 | 0,478810325 | -0,14 | 0,75629951  | 0,35  | 0,479585604 |
| Clc5    | 1,14  | 0,149002608 | 1,97  | 0,196295439 | -2,12 | 0,005065589 | -5,35 | 0,003009221 | 0,52  | 0,389039445 |
| Clc6    | -0,24 | 0,840909921 | -0,04 | 0,980518468 | 0,31  | 0,653577245 | 1,1   | 0,120688974 | 0,26  | 0,671222633 |
| Clint1  | 0     | 0,999288019 | -0,25 | 0,674832256 | 0,68  | 0,114973056 | 0,87  | 0,045034122 | 0,36  | 0,450543672 |
| Clip1   | -0,51 | 0,357054834 | 0,03  | 0,970832543 | -0,09 | 0,867543859 | -0,76 | 0,1525211   | -0,22 | 0,749887358 |
| Clip2   | 0,1   | 0,922118639 | -0,14 | 0,821387717 | -0,17 | 0,830487056 | 0,8   | 0,05727577  | 0,03  | 0,975441362 |
| Clip3   | -0,29 | 0,81266486  | 0,68  | 0,245917773 | 0,26  | 0,835677021 | -1,58 | 0,037302258 | -0,97 | 0,105052563 |
| Clip4   | 0,09  | 0,898116888 | 0,15  | 0,803395544 | -0,09 | 0,914774845 | -0,17 | 0,837723766 | -0,12 | 0,917075631 |
| Clk1    | 0,12  | 0,786628015 | 0,25  | 0,551515746 | -0,32 | 0,529853952 | -0,36 | 0,290249342 | 0,12  | 0,864415219 |
| Clk2    | -0,16 | 0,807765056 | 0,06  | 0,955382206 | -0,22 | 0,840730961 | -0,68 | 0,117442296 | -0,11 | 0,901139449 |
| Clk3    | 0,09  | 0,865055523 | 0,13  | 0,790939978 | 0,19  | 0,816360932 | -0,07 | 0,872399256 | -0,06 | 0,947254077 |

|         |       |             |       |             |       |             |       |             |       |             |
|---------|-------|-------------|-------|-------------|-------|-------------|-------|-------------|-------|-------------|
| Clk4    | 0,25  | 0,57672557  | 0,52  | 0,297241815 | -0,24 | 0,660920525 | -0,49 | 0,169916512 | 0,38  | 0,452376077 |
| Clmn    | 0,02  | 0,98782208  | 0,08  | 0,944460866 | 0,91  | 0,287512572 | -0,3  | 0,774664674 | 0,15  | 0,917710291 |
| Clmp    | -0,23 | 0,739638841 | 0,06  | 0,932390453 | -0,21 | 0,804784019 | 0,23  | 0,533448124 | -0,05 | 0,960974478 |
| Cln3    | 0,52  | 0,174631079 | 0,66  | 0,325242663 | 0,28  | 0,736837174 | 0,7   | 0,331328372 | -0,23 | 0,823125838 |
| Cln5    | 0,1   | 0,839375532 | 0,25  | 0,726494244 | 0,01  | 0,988721964 | -0,5  | 0,169538994 | -0,02 | 0,989183416 |
| Cln6    | -0,41 | 0,338531311 | 0,68  | 0,264702741 | -0,55 | 0,576712107 | -0,31 | 0,795439286 | -0,64 | 0,589933151 |
| Cln8    | -0,58 | 0,657154622 | -0,53 | 0,446315327 | 0,45  | 0,830541787 | -0,09 | 0,82237355  | 0,01  | 0,9939542   |
| Clnk    | -0,38 | 0,301180874 | 0,2   | 0,731098047 | -0,77 | 0,12691088  | -0,4  | 0,413953044 | -0,29 | 0,741358152 |
| Clnkos  | 0,29  | 0,754512253 | -0,18 | 0,717042838 | -0,07 | 0,959596019 | 0,37  | 0,375830483 | 0,31  | 0,633381473 |
| Clns1a  | -0,2  | 0,622436248 | -0,6  | 0,585138173 | 0,57  | 0,571681705 | 1,3   | 0,308218931 | 0,41  | 0,801385411 |
| Clock   | -0,12 | 0,834886413 | -0,12 | 0,833928567 | 0,17  | 0,852412472 | 0,07  | 0,912439607 | 0     | 0,998164722 |
| Clp1    | 0,66  | 0,104092085 | 0,73  | 0,188301476 | 0,54  | 0,599202081 | -0,78 | 0,146331962 | 0,1   | 0,918030935 |
| Clpb    | -0,01 | 0,992748202 | -0,3  | 0,716437544 | -0,13 | 0,902488931 | -0,05 | 0,950330103 | -0,4  | 0,571122283 |
| Clpp    | -0,45 | 0,362668226 | -0,15 | 0,764299173 | 0,16  | 0,826872735 | -0,35 | 0,310358435 | -0,11 | 0,892912029 |
| Clps    | -0,19 | 0,733572164 | 0,03  | 0,975765252 | -0,07 | 0,923781798 | 0,09  | 0,872394965 | 0,01  | 0,991628025 |
| Clpsl2  | 0,09  | 0,861049109 | 0     | 0,999210601 | -0,21 | 0,732059738 | -0,23 | 0,676390381 | 0,01  | 0,993293923 |
| Clptm1  | -0,13 | 0,754653765 | -0,1  | 0,818485287 | 0,56  | 0,280958182 | -0,28 | 0,49823803  | -0,22 | 0,738260196 |
| Clptm11 | -0,41 | 0,40470849  | -0,26 | 0,532181703 | 0,23  | 0,666715303 | 0,25  | 0,701481618 | -0,07 | 0,951429597 |
| Clpx    | 0,09  | 0,932354771 | 0,02  | 0,991507752 | -0,47 | 0,69871815  | 0,01  | 0,988205241 | -0,18 | 0,828679046 |
| Clrn1   | -0,48 | 0,373844376 | 0,21  | 0,872187376 | -0,15 | 0,884861819 | -0,24 | 0,759473443 | -0,02 | 0,986300139 |
| Clrn2   | -0,02 | 0,983516046 | -0,01 | 0,997600248 | -0,15 | 0,906097666 | -0,17 | 0,727196974 | 0,17  | 0,765144314 |
| Clrn3   | -0,18 | 0,717407143 | 0,31  | 0,786405071 | -0,09 | 0,908030225 | 0,18  | 0,703913685 | 0,29  | 0,64350521  |
| Clspn   | -0,8  | 0,247531815 | -0,61 | 0,153524445 | 0,95  | 0,260217755 | 0,96  | 0,057215016 | -0,06 | 0,953297732 |
| Clstn1  | -0,65 | 0,188527208 | -0,3  | 0,536246395 | -0,03 | 0,963221639 | -0,96 | 0,143071117 | -0,67 | 0,366079495 |
| Clstn2  | -0,24 | 0,631544171 | 0,05  | 0,925583763 | -0,09 | 0,904884293 | -0,4  | 0,545758277 | -0,5  | 0,471919432 |
| Clstn3  | -0,38 | 0,493923359 | 0,25  | 0,740950263 | -0,66 | 0,264920343 | 0,02  | 0,986768223 | -0,32 | 0,732769706 |
| Clta    | -0,03 | 0,970463755 | 0,14  | 0,835533307 | 0,1   | 0,926091985 | 0,1   | 0,848110026 | -0,03 | 0,97683359  |
| Cltb    | 0,01  | 0,98456417  | -0,07 | 0,904698551 | 0,13  | 0,888377256 | -0,63 | 0,16321411  | 0,53  | 0,285422876 |
| Cltc    | -0,38 | 0,287459734 | -0,15 | 0,754479452 | 0,2   | 0,709314442 | 0,52  | 0,25955285  | 0,19  | 0,791775279 |
| Clu     | -0,07 | 0,928944712 | 0,33  | 0,814720451 | 0,32  | 0,732341031 | -0,9  | 0,267446045 | -0,7  | 0,297779648 |
| Cluap1  | 0,13  | 0,89763852  | -0,19 | 0,883843639 | -0,27 | 0,773801432 | -0,1  | 0,936955674 | -0,08 | 0,955654991 |
| Cluh    | -0,67 | 0,170739091 | -0,65 | 0,441593532 | 0,52  | 0,606014837 | 0,45  | 0,404777882 | -0,23 | 0,718925476 |
| Clvs1   | 0,18  | 0,747914748 | -0,59 | 0,40486209  | 0,12  | 0,922274387 | 0,81  | 0,176649178 | -0,36 | 0,583882299 |
| Clvs2   | 0,43  | 0,474293292 | -0,08 | 0,910688765 | -0,11 | 0,901071918 | 0,21  | 0,751187418 | -0,18 | 0,825408041 |
| Clybl   | 0,58  | 0,61379872  | 0,04  | 0,994137877 | 0,79  | 0,712697139 | -0,89 | 0,092685575 | -1,29 | 0,122233155 |

|          |       |             |       |             |       |             |       |             |       |             |
|----------|-------|-------------|-------|-------------|-------|-------------|-------|-------------|-------|-------------|
| Cma1     | 0,17  | 0,776877258 | -0,24 | 0,716070721 | -0,13 | 0,947881687 | 0,02  | 0,969457268 | -0,12 | 0,862456985 |
| Cma2     | -0,35 | 0,702313432 | 0,3   | 0,802788292 | -0,18 | 0,868054401 | -0,68 | 0,121159477 | -0,14 | 0,830086988 |
| Cmah     | -0,47 | 0,648730873 | -0,4  | 0,598969634 | 1,03  | 0,290123118 | -1,32 | 0,025699992 | 0,23  | 0,822709063 |
| Cmas     | 0,01  | 0,993175772 | 0,38  | 0,522440093 | 0,33  | 0,530318769 | 0,86  | 0,050801879 | 0,13  | 0,904371266 |
| Cmbl     | -0,38 | 0,660482793 | -0,15 | 0,826862641 | -0,01 | 0,997220401 | -0,15 | 0,911958998 | -0,99 | 0,272986942 |
| Cmc1     | 0,29  | 0,567102759 | 0,38  | 0,661080964 | -0,48 | 0,379638471 | 0,46  | 0,3487974   | 0,18  | 0,818887323 |
| Cmc2     | 0,29  | 0,616144081 | -0,65 | 0,374404754 | -0,08 | 0,926804212 | 0,48  | 0,725503838 | 0,23  | 0,915356549 |
| Cmc4     | 0,66  | 0,13473547  | 0,81  | 0,277253387 | -0,58 | 0,581366636 | -1,37 | 0,02663501  | 1,04  | 0,035870857 |
| Cmip     | -0,05 | 0,921474899 | -0,08 | 0,894022563 | 0,23  | 0,689058581 | -0,35 | 0,347813972 | -0,51 | 0,272406804 |
| Cmklr1   | -0,55 | 0,318041432 | -1,4  | 0,050349788 | 0,58  | 0,723987482 | -2,77 | 0,005240816 | -0,59 | 0,445839943 |
| Cmpk1    | 0,47  | 0,732196499 | 0,15  | 0,910955776 | 0,28  | 0,837156771 | 1,34  | 0,236329848 | 0,96  | 0,374832618 |
| Cmpk2    | 0,29  | 0,532742416 | 0,61  | 0,187729631 | -0,82 | 0,166067688 | -0,93 | 0,026955373 | 0,97  | 0,03353848  |
| Cmss1    | -0,22 | 0,727413551 | -0,97 | 0,180045682 | 0,9   | 0,291949275 | 0,33  | 0,418317818 | -0,67 | 0,38958828  |
| Cmtm1    | 0,45  | 0,729108809 | 0,06  | 0,981758111 | 0,06  | 0,950052494 | 0,24  | 0,588987424 | 0,25  | 0,643580968 |
| Cmtm2a   | -0,16 | 0,736578609 | -0,52 | 0,532983509 | -0,03 | 0,968742139 | 0,41  | 0,493856127 | 0,11  | 0,930575749 |
| Cmtm2b   | 0,6   | 0,335212152 | 0,07  | 0,928961063 | -0,21 | 0,769583333 | 0,16  | 0,731281458 | 0,02  | 0,983613958 |
| Cmtm3    | -0,1  | 0,829299665 | -0,21 | 0,642214918 | 0,29  | 0,777918093 | 1,08  | 0,069207734 | 0,38  | 0,548820035 |
| Cmtm4    | -0,11 | 0,884302617 | -0,07 | 0,92731256  | 0,39  | 0,555425727 | 0,44  | 0,274925197 | -0,07 | 0,937558003 |
| Cmtm5    | 0,05  | 0,963914207 | -0,06 | 0,944864292 | 0,24  | 0,776071062 | -0,34 | 0,521206029 | -0,16 | 0,861038502 |
| Cmtm6    | 0,11  | 0,90742841  | 0,4   | 0,367968212 | 0     | 0,997779809 | -0,14 | 0,719644697 | 0,13  | 0,85508146  |
| Cmtm7    | 0,33  | 0,515249167 | -0,17 | 0,763005394 | 0     | 0,997581017 | 0,59  | 0,406946214 | 0,19  | 0,883885544 |
| Cmtm8    | -0,88 | 0,190863616 | -0,44 | 0,369363382 | 0,71  | 0,163572561 | -1,59 | 0,025083061 | -1,03 | 0,064929499 |
| Cmtr1    | 0,66  | 0,714662474 | -0,23 | 0,881574142 | 0,03  | 0,990836784 | 0,11  | 0,940948462 | -0,18 | 0,89559535  |
| Cmtr2    | -0,01 | 0,986636441 | 0,12  | 0,937424389 | 0,57  | 0,265846442 | 0,05  | 0,971149993 | 0,09  | 0,939127163 |
| Cmya5    | 0,12  | 0,825308689 | -0,05 | 0,946599376 | 0,06  | 0,944266382 | 0,05  | 0,932315462 | -0,14 | 0,845142293 |
| CN725425 | -0,09 | 0,924502628 | 0,63  | 0,741513368 | 0,03  | 0,975055092 | 0,11  | 0,873610553 | 0,25  | 0,809875334 |
| Cnbd1    | 0,21  | 0,738448626 | 0,25  | 0,725214925 | -0,12 | 0,883788616 | -0,2  | 0,545526881 | 0,14  | 0,822818919 |
| Cnbd2    | 0,35  | 0,537328866 | -0,25 | 0,745921616 | 0,31  | 0,676693033 | -0,32 | 0,656038987 | -0,27 | 0,78960943  |
| Cnbp     | -0,46 | 0,269151748 | -0,25 | 0,728434379 | 0,61  | 0,558908463 | 0,02  | 0,979535553 | 0,29  | 0,618748455 |
| Cndp1    | -0,1  | 0,905474992 | 0,48  | 0,587634717 | 0,01  | 0,994130625 | 0,03  | 0,972244785 | 0,37  | 0,560964387 |
| Cndp2    | -0,49 | 0,262381624 | 0,02  | 0,974580396 | 0,3   | 0,704809914 | 0,9   | 0,141875284 | 0,35  | 0,628999683 |
| Cnep1r1  | 0,08  | 0,914868427 | -0,03 | 0,948409105 | 0,57  | 0,47695455  | 0,44  | 0,623454349 | 0,76  | 0,353136904 |
| Cnfn     | -0,12 | 0,886889675 | 0,06  | 0,974702154 | 0,2   | 0,70398922  | -0,06 | 0,940518964 | -0,04 | 0,975441362 |
| Cnga1    | -0,25 | 0,59710379  | -0,06 | 0,926157704 | -0,04 | 0,964659521 | 0,23  | 0,483554745 | -0,25 | 0,715879151 |
| Cnga2    | -0,28 | 0,761457464 | 0,15  | 0,812432185 | 0,25  | 0,644572045 | 0,16  | 0,736423588 | 0,07  | 0,935006901 |

|        |       |             |       |             |       |             |       |             |       |             |
|--------|-------|-------------|-------|-------------|-------|-------------|-------|-------------|-------|-------------|
| Cnga3  | -0,42 | 0,334676974 | 0,04  | 0,980385701 | -0,29 | 0,661445401 | -0,31 | 0,302947477 | -0,24 | 0,788112596 |
| Cnga4  | 0,42  | 0,325819652 | -0,32 | 0,638598252 | 0,04  | 0,955984004 | 0,21  | 0,669934454 | 0,11  | 0,932521789 |
| Cngb1  | -0,31 | 0,501390979 | 0,03  | 0,979551751 | 0,08  | 0,906656115 | -0,34 | 0,528506752 | -0,35 | 0,623214829 |
| Cngb3  | 0,21  | 0,656726345 | 0,05  | 0,943915456 | -0,16 | 0,825125026 | 0,29  | 0,482775113 | 0,18  | 0,830268209 |
| Cnih1  | 0,2   | 0,817916182 | -0,27 | 0,613344994 | 0,47  | 0,613496662 | 0,96  | 0,146979523 | -0,44 | 0,655956123 |
| Cnih2  | 0,1   | 0,937322082 | 0,28  | 0,859954464 | 0,19  | 0,896181325 | 0,31  | 0,77314251  | -0,4  | 0,702558142 |
| Cnih3  | -0,38 | 0,61379872  | -0,43 | 0,6041496   | 0,22  | 0,705811313 | 0,36  | 0,353797054 | 0,07  | 0,95985938  |
| Cnih4  | 0,26  | 0,635225989 | -0,14 | 0,781046971 | 0,7   | 0,138770182 | -0,07 | 0,877053477 | 0,01  | 0,986971861 |
| Cnksr1 | 1,2   | 0,053789028 | 0,92  | 0,342987643 | 0,39  | 0,712697139 | -0,7  | 0,334704308 | 0,86  | 0,33353181  |
| Cnksr2 | 0,34  | 0,707502054 | 0,35  | 0,809963911 | 0,1   | 0,930645703 | -0,7  | 0,400176197 | -0,65 | 0,354321853 |
| Cnksr3 | -0,12 | 0,839375532 | 0,54  | 0,430665523 | -0,29 | 0,591404136 | -0,08 | 0,921600281 | 0,06  | 0,954565959 |
| Cnn1   | -0,37 | 0,55640978  | -0,12 | 0,861905894 | -0,09 | 0,935978536 | -2,08 | 0,009990534 | -1,44 | 0,228752557 |
| Cnn2   | -0,56 | 0,244269955 | -0,1  | 0,919841135 | 0,65  | 0,29239254  | 0,65  | 0,225764128 | -0,26 | 0,690432079 |
| Cnn3   | 0,34  | 0,346170601 | 0,35  | 0,363298292 | -0,32 | 0,555425727 | 0,23  | 0,523255995 | 0,35  | 0,45660227  |
| Cnnm1  | -0,22 | 0,568902511 | 0,48  | 0,272116352 | -0,17 | 0,755825002 | -0,2  | 0,561974365 | -0,11 | 0,872367819 |
| Cnnm2  | 0,2   | 0,854412004 | -0,22 | 0,825313113 | -0,56 | 0,340237423 | -0,66 | 0,290774064 | 0,19  | 0,777223566 |
| Cnnm3  | -0,51 | 0,260634235 | -0,52 | 0,495742596 | -0,21 | 0,783006    | -0,29 | 0,745247243 | -0,06 | 0,967807075 |
| Cnnm4  | 0,19  | 0,767797797 | -0,21 | 0,859223551 | 0,66  | 0,215153182 | 0,33  | 0,680255321 | -0,19 | 0,869403669 |
| Cnot1  | -0,12 | 0,773899768 | -0,12 | 0,795850594 | 0,39  | 0,39810038  | 0,12  | 0,8175318   | -0,19 | 0,796713037 |
| Cnot10 | -0,39 | 0,618165972 | -0,09 | 0,926178529 | 0,77  | 0,450605545 | 0,14  | 0,829691356 | -0,22 | 0,731527639 |
| Cnot11 | -0,11 | 0,89785374  | -0,24 | 0,696160257 | 0,82  | 0,417043643 | 0,4   | 0,588576174 | -0,19 | 0,833369653 |
| Cnot2  | -0,05 | 0,932654105 | 0,11  | 0,869553    | 0     | 0,998757399 | 0,57  | 0,563131599 | 0,62  | 0,506316926 |
| Cnot3  | -0,12 | 0,825721541 | 0     | 1           | 0,07  | 0,95106142  | 0,05  | 0,903384033 | -0,33 | 0,550083777 |
| Cnot4  | 0,35  | 0,575887113 | 0,35  | 0,615288453 | -0,16 | 0,873660573 | -0,06 | 0,912867628 | 0,42  | 0,427936864 |
| Cnot6  | -0,17 | 0,71726775  | -0,05 | 0,954378914 | 0,35  | 0,543291636 | 0,62  | 0,253124162 | -0,12 | 0,890957032 |
| Cnot6l | -0,06 | 0,921111827 | 0,19  | 0,678357594 | 0,05  | 0,941583656 | 0,19  | 0,632702624 | 0,26  | 0,659780385 |
| Cnot7  | 0,1   | 0,90742841  | 0,14  | 0,804611595 | 0,11  | 0,949396893 | 1,21  | 0,026588488 | 0,43  | 0,516974384 |
| Cnot8  | -0,73 | 0,22137005  | -0,06 | 0,943915456 | 0,13  | 0,917508513 | 0,12  | 0,870331513 | 0,17  | 0,853107295 |
| Cnp    | 0,1   | 0,904541231 | 0,15  | 0,912137323 | 0,01  | 0,995007689 | -0,13 | 0,891204936 | 0,18  | 0,832848337 |
| Cnppd1 | 0,09  | 0,88886575  | 0,25  | 0,729172466 | 0,04  | 0,973000462 | -0,37 | 0,588534092 | -0,46 | 0,592460098 |
| Cnpy1  | 0,17  | 0,765643907 | 0,22  | 0,729172466 | 0,1   | 0,923248239 | 0,09  | 0,900081417 | -0,11 | 0,917356423 |
| Cnpy2  | -0,18 | 0,720829271 | -0,23 | 0,763005394 | 0,78  | 0,4814931   | 0     | 0,996714438 | -0,68 | 0,146071636 |
| Cnpy3  | -0,42 | 0,652819827 | -0,13 | 0,837500541 | 0,23  | 0,829285065 | 0,01  | 0,994512187 | -0,08 | 0,962820357 |
| Cnpy4  | -0,55 | 0,268112899 | -0,3  | 0,778589117 | 0,2   | 0,849342965 | 0,72  | 0,262648423 | -0,25 | 0,830813323 |
| Cnr1   | -0,41 | 0,654968489 | -0,1  | 0,930192503 | -0,17 | 0,819233853 | 0,32  | 0,662899695 | 0,26  | 0,635195583 |

|          |       |             |       |             |       |             |       |             |       |             |
|----------|-------|-------------|-------|-------------|-------|-------------|-------|-------------|-------|-------------|
| Cnr2     | -0,2  | 0,757239936 | 0,34  | 0,732044571 | -0,37 | 0,419537272 | -1,23 | 0,040564476 | -0,79 | 0,505021443 |
| Cnrip1   | 0,1   | 0,923180948 | -0,16 | 0,808110364 | -0,34 | 0,716743339 | -0,08 | 0,847194434 | -0,11 | 0,904040121 |
| Cnst     | -0,38 | 0,394571141 | 0,08  | 0,958545812 | 0,23  | 0,82162081  | -0,59 | 0,251630483 | -0,29 | 0,597394182 |
| Cntd1    | 0,02  | 0,988818464 | -0,15 | 0,894575535 | -0,66 | 0,300988698 | -0,14 | 0,816522198 | -0,18 | 0,853060981 |
| Cntf     | -0,19 | 0,924502628 | 0,25  | 0,838450577 | 1,05  | 0,471873683 | 0,55  | 0,45698422  | -0,19 | 0,939127163 |
| Cntfr    | -0,3  | 0,706900702 | -0,05 | 0,936792848 | 0,74  | 0,27041915  | -1    | 0,216560476 | -0,75 | 0,397952448 |
| Cntln    | -0,15 | 0,823442726 | -0,22 | 0,801259805 | -0,02 | 0,994700527 | -0,3  | 0,702311689 | -0,36 | 0,600537288 |
| Cntn1    | 0,05  | 0,950532575 | 0,08  | 0,926476797 | 0,29  | 0,678840444 | -0,48 | 0,48871055  | -0,27 | 0,767310323 |
| Cntn2    | 0,23  | 0,648730873 | 0,21  | 0,732847182 | -0,34 | 0,524334529 | 0,01  | 0,992752594 | -0,03 | 0,979152939 |
| Cntn3    | 0,2   | 0,673291416 | -0,27 | 0,813423328 | -0,02 | 0,991568687 | -0,17 | 0,757267334 | -0,27 | 0,683155561 |
| Cntn4    | 0,19  | 0,870613574 | -0,38 | 0,51825831  | 0     | 0,997268369 | 0,12  | 0,812244154 | -0,03 | 0,979152939 |
| Cntn5    | -0,46 | 0,474382977 | 0,34  | 0,442884795 | -0,23 | 0,736154599 | -0,54 | 0,166705221 | -0,17 | 0,834671019 |
| Cntn6    | 0,14  | 0,813220024 | -0,09 | 0,872388615 | 0     | 0,999002132 | 0,54  | 0,208187428 | 0,03  | 0,97994127  |
| Cntnap1  | -0,12 | 0,887874421 | -0,65 | 0,265851266 | 0,36  | 0,676693033 | -0,5  | 0,177649418 | -1,03 | 0,145563798 |
| Cntnap2  | -0,05 | 0,944991778 | -0,13 | 0,824372931 | -0,15 | 0,829099961 | 0,07  | 0,883821307 | -0,19 | 0,767285294 |
| Cntnap3  | -0,47 | 0,24433542  | 0,09  | 0,934438798 | -0,1  | 0,923287079 | -0,01 | 0,991962381 | -0,07 | 0,956610289 |
| Cntnap4  | 0,29  | 0,701391957 | 0,1   | 0,948048585 | 0,23  | 0,881463812 | -0,31 | 0,687105021 | -0,08 | 0,95985938  |
| Cntnap5a | 0,14  | 0,836404089 | 0,25  | 0,777999988 | 0,16  | 0,849342965 | 0,07  | 0,970247298 | -0,89 | 0,498598092 |
| Cntnap5b | 0,05  | 0,948926586 | 0,06  | 0,985413376 | 0,27  | 0,679157998 | 0,25  | 0,606590988 | 0,45  | 0,486708315 |
| Cntnap5c | 0,28  | 0,701391957 | -0,4  | 0,782712411 | -0,03 | 0,974887915 | 0,44  | 0,449932456 | 0,12  | 0,911850421 |
| Cntrl    | 0,05  | 0,922411993 | -0,01 | 0,998237793 | 0,02  | 0,989491273 | -0,09 | 0,900918368 | -0,08 | 0,939607682 |
| Cntrob   | -0,14 | 0,826083295 | -0,51 | 0,487477927 | -0,4  | 0,426620673 | 0,5   | 0,334983137 | -0,12 | 0,884762809 |
| Cntrobos | -0,02 | 0,966775766 | -0,01 | 0,996105203 | -0,04 | 0,952366216 | 0,05  | 0,922740736 | 0,27  | 0,654946663 |
| Coa3     | 0,12  | 0,807107762 | -0,27 | 0,637224838 | 0,27  | 0,6410789   | 0,47  | 0,276210999 | 0     | 0,999572304 |
| Coa4     | 0,05  | 0,958512892 | 0,16  | 0,769052742 | -0,35 | 0,736423214 | 0,19  | 0,62344204  | -0,06 | 0,932846086 |
| Coa5     | -0,24 | 0,704646948 | -0,06 | 0,945241217 | 0,44  | 0,501664412 | 0,31  | 0,323830449 | -0,42 | 0,431894609 |
| Coa6     | -0,04 | 0,964358894 | 0,07  | 0,9307541   | 0,43  | 0,72066129  | 0,3   | 0,595892725 | 0,32  | 0,616797608 |
| Coa7     | 0,02  | 0,971418239 | -0,37 | 0,505680918 | 0,47  | 0,456109035 | 0,26  | 0,700370843 | -0,24 | 0,746672639 |
| Coasy    | -0,18 | 0,7494877   | 0,29  | 0,753679288 | 0,25  | 0,732624117 | -0,09 | 0,857884225 | -0,04 | 0,966951657 |
| Cobl     | -0,36 | 0,602160482 | -0,34 | 0,485712513 | 0,48  | 0,374422909 | -0,01 | 0,993646757 | 0,23  | 0,800560035 |
| Cobl1    | -0,3  | 0,61300824  | -1,47 | 0,271145766 | 0,45  | 0,494913817 | 0,02  | 0,989027396 | 0,41  | 0,695992915 |
| Coch     | -0,23 | 0,600118979 | -0,19 | 0,857408462 | -0,24 | 0,870377336 | 0,44  | 0,334437171 | -0,01 | 0,990839896 |
| Cog1     | -0,51 | 0,476494431 | 0,33  | 0,806269536 | 0,23  | 0,851432891 | -0,01 | 0,999809258 | 0,31  | 0,788112596 |
| Cog2     | 0,07  | 0,967145277 | -0,14 | 0,818072947 | 0,73  | 0,308729033 | 0,11  | 0,858632076 | -0,35 | 0,606740281 |
| Cog3     | -0,68 | 0,461401764 | -0,12 | 0,93451524  | 0,38  | 0,732624117 | -0,15 | 0,847627021 | -0,27 | 0,760401775 |



|          |       |             |       |             |       |             |       |             |       |             |
|----------|-------|-------------|-------|-------------|-------|-------------|-------|-------------|-------|-------------|
| Cog4     | -0,14 | 0,853439426 | -0,26 | 0,508633526 | 0,04  | 0,978012085 | 0,65  | 0,172652422 | -0,36 | 0,596092228 |
| Cog5     | -0,04 | 0,971418239 | 0,38  | 0,591305258 | -0,39 | 0,625745801 | -1,06 | 0,153265608 | -1,45 | 0,074994643 |
| Cog6     | -0,21 | 0,762798673 | -0,46 | 0,361859121 | 0,5   | 0,337509636 | 0,4   | 0,463383161 | 0,06  | 0,960175192 |
| Cog7     | -0,12 | 0,877400217 | -0,31 | 0,51825831  | -0,01 | 0,994572791 | -0,14 | 0,829478092 | -0,48 | 0,550083777 |
| Cog8     | -0,19 | 0,629987739 | 0     | 1           | -0,05 | 0,962766843 | 0,36  | 0,665890635 | 0,08  | 0,968799126 |
| Coil     | -0,31 | 0,860985365 | -0,26 | 0,880363126 | -0,37 | 0,712854314 | -0,43 | 0,709459337 | -0,6  | 0,77382007  |
| Col10a1  | -0,27 | 0,54401985  | 0,34  | 0,500152819 | -0,03 | 0,968742139 | -0,05 | 0,912858228 | -0,4  | 0,553650211 |
| Col11a1  | -0,07 | 0,955200574 | -0,16 | 0,802182047 | -0,01 | 0,995401448 | 0,03  | 0,958584066 | 0,18  | 0,799596237 |
| Col11a2  | 0,15  | 0,75201912  | -0,18 | 0,656294004 | -0,13 | 0,894109709 | 0,45  | 0,200064284 | 0,08  | 0,932268703 |
| Col12a1  | 0,19  | 0,889788892 | -0,3  | 0,730536814 | 0,91  | 0,218005052 | -2,52 | 0,061253799 | -1,44 | 0,290947419 |
| Col13a1  | 0,15  | 0,896207658 | -0,1  | 0,882847123 | -0,25 | 0,74860644  | -0,16 | 0,79260405  | -0,84 | 0,142924421 |
| Col14a1  | 0,16  | 0,832696131 | 0,1   | 0,927205716 | -0,45 | 0,500402143 | -0,04 | 0,947570266 | -0,11 | 0,915356549 |
| Col15a1  | -1,79 | 0,027347112 | -1,22 | 0,095215923 | 1,83  | 0,004547033 | 2,21  | 0,006048812 | -2,3  | 0,003659564 |
| Col16a1  | 0,15  | 0,78476082  | 0,23  | 0,639906666 | 0,25  | 0,624057916 | -0,24 | 0,470051531 | -0,03 | 0,975441362 |
| Col17a1  | -0,06 | 0,939317944 | 0,14  | 0,809963911 | -0,04 | 0,963115643 | -0,21 | 0,779359391 | -0,09 | 0,946434441 |
| Col18a1  | -1,18 | 0,024768323 | -1,14 | 0,123464373 | 1,08  | 0,010231053 | 2,05  | 0,004876398 | -0,45 | 0,613836622 |
| Col19a1  | 0,42  | 0,434641897 | 0,07  | 0,935329426 | -0,15 | 0,864053515 | 0,28  | 0,74136915  | 0,44  | 0,633360146 |
| Col1a1   | -0,1  | 0,926468256 | -0,01 | 0,998818332 | 0,61  | 0,36356264  | 1,21  | 0,028737348 | -0,04 | 0,968130547 |
| Col1a2   | -0,27 | 0,840515514 | -0,03 | 0,992175086 | 0,17  | 0,885250819 | 0,66  | 0,365354172 | 0,15  | 0,886027227 |
| Col20a1  | 0,29  | 0,718904956 | -0,07 | 0,952937385 | 0,01  | 0,993379272 | 0,03  | 0,976503337 | -0,33 | 0,668880857 |
| Col22a1  | 0,01  | 0,989017567 | -0,14 | 0,82485467  | 0,18  | 0,821436564 | 0,45  | 0,230237236 | 0,36  | 0,536721752 |
| Col23a1  | 0,17  | 0,771904131 | 0     | 1           | -0,14 | 0,877023506 | 0,03  | 0,97666971  | 0,47  | 0,568603739 |
| Col24a1  | 0,3   | 0,599901527 | -0,32 | 0,625799543 | -0,22 | 0,724675525 | 0,13  | 0,766203596 | 0,01  | 0,991977803 |
| Col25a1  | 0,37  | 0,464717154 | 0,21  | 0,677713323 | -0,31 | 0,520548688 | -0,21 | 0,645719738 | -0,18 | 0,792346596 |
| Col26a1  | -0,13 | 0,78476082  | -0,24 | 0,722938629 | 0,52  | 0,457740325 | 0,37  | 0,243876155 | 0,03  | 0,969937563 |
| Col27a1  | -0,51 | 0,297096518 | 0,23  | 0,752804236 | 0,28  | 0,568619313 | 0,21  | 0,680255321 | 0,07  | 0,946463658 |
| Col28a1  | 0,01  | 0,996219097 | -0,35 | 0,698936953 | -0,16 | 0,922318683 | 0,44  | 0,515329684 | -0,19 | 0,830268209 |
| Col2a1   | 0,18  | 0,721378796 | -0,01 | 0,992017084 | -0,02 | 0,982305856 | 0,29  | 0,594365292 | -0,08 | 0,934185668 |
| Col3a1   | -0,05 | 0,961844317 | -0,33 | 0,609769897 | 0,58  | 0,140802581 | 0,65  | 0,155078111 | -0,15 | 0,862867603 |
| Col4a1   | -0,78 | 0,151560276 | -0,21 | 0,631728257 | 0,29  | 0,760721308 | 2,01  | 0,01888325  | -0,62 | 0,330057248 |
| Col4a2   | -0,61 | 0,165137501 | -0,17 | 0,670204653 | 0,39  | 0,605402838 | 2,12  | 0,004331967 | -0,46 | 0,369835412 |
| Col4a3   | 0,04  | 0,940281494 | -0,27 | 0,682851626 | 0,31  | 0,53951409  | -1,27 | 0,023383443 | -1,21 | 0,064929499 |
| Col4a3bp | 0,31  | 0,583642917 | 0,09  | 0,891566803 | -0,11 | 0,919754592 | 0,29  | 0,378870708 | 0,61  | 0,202369779 |
| Col4a4   | 0,09  | 0,867243066 | 0,01  | 0,996865461 | -0,14 | 0,845651772 | -0,29 | 0,5291456   | -0,16 | 0,799584228 |
| Col4a5   | 0,09  | 0,911399028 | 0,07  | 0,902148738 | 0,17  | 0,845651772 | -1,08 | 0,033579739 | -0,61 | 0,215020606 |

|          |       |             |       |             |       |             |       |             |       |             |
|----------|-------|-------------|-------|-------------|-------|-------------|-------|-------------|-------|-------------|
| Col4a6   | 0,31  | 0,614250688 | 0,03  | 0,980518468 | -0,07 | 0,94665439  | -0,52 | 0,220684416 | -0,37 | 0,53166502  |
| Col5a1   | -0,18 | 0,832696131 | 0,21  | 0,842824184 | 0,21  | 0,714609376 | -0,08 | 0,921731995 | -0,17 | 0,825990389 |
| Col5a2   | -0,48 | 0,532118658 | 0,18  | 0,802308852 | 0,5   | 0,36945384  | -0,68 | 0,125239737 | -0,24 | 0,716670858 |
| Col5a3   | -0,08 | 0,927072151 | -0,26 | 0,582976316 | 0,19  | 0,794542194 | 0,27  | 0,512797637 | 0,15  | 0,84147389  |
| Col6a1   | -0,23 | 0,827974901 | 0,55  | 0,353003818 | 0,24  | 0,780528725 | -0,13 | 0,818693228 | -0,44 | 0,560964387 |
| Col6a2   | -0,14 | 0,874847576 | 0,03  | 0,960908344 | 0,11  | 0,9030272   | -0,01 | 0,983166423 | -0,22 | 0,74933755  |
| Col6a3   | -0,3  | 0,680520303 | 0,06  | 0,963168371 | 0,23  | 0,712697139 | 0,79  | 0,128164731 | 0,17  | 0,813330134 |
| Col6a4   | 0,35  | 0,576400203 | 0,12  | 0,900801202 | -0,28 | 0,75200406  | 0,47  | 0,317152726 | 0,16  | 0,857606999 |
| Col6a5   | -0,11 | 0,91960004  | -0,03 | 0,958663163 | 0,06  | 0,963357998 | 0,22  | 0,654230107 | -0,18 | 0,827532593 |
| Col6a6   | 0,26  | 0,557865885 | -0,09 | 0,880892852 | -0,41 | 0,490661923 | 0     | 0,997771107 | -0,3  | 0,666026291 |
| Col7a1   | 0,27  | 0,572663199 | 0,01  | 0,996333613 | 0,47  | 0,299940362 | -0,09 | 0,840831398 | -0,15 | 0,82823489  |
| Col8a1   | 1,35  | 0,12351475  | 0,83  | 0,123975096 | -1,09 | 0,218776606 | 1,4   | 0,015037702 | -0,34 | 0,572768596 |
| Col8a2   | 0,96  | 0,188872409 | -0,2  | 0,84314495  | -0,57 | 0,557612538 | -0,09 | 0,868452088 | -0,07 | 0,939248399 |
| Col9a1   | 0,56  | 0,214430522 | 0,37  | 0,59236258  | -0,19 | 0,792016423 | -0,07 | 0,853963723 | 0,41  | 0,427029911 |
| Col9a2   | -0,15 | 0,77521874  | 0,05  | 0,926178529 | -0,08 | 0,916362962 | 0,26  | 0,684247831 | 0,18  | 0,839968098 |
| Col9a3   | 0,18  | 0,778869381 | 0,21  | 0,738199172 | -0,04 | 0,973186233 | -0,21 | 0,716055856 | 0,19  | 0,82794257  |
| Colec10  | -0,03 | 0,972418196 | -0,47 | 0,464689086 | 0,31  | 0,703045192 | 0,23  | 0,742500851 | 0,03  | 0,980945466 |
| Colec11  | -0,08 | 0,897614401 | -0,33 | 0,614530823 | -0,19 | 0,791876238 | 0,1   | 0,855511807 | -0,33 | 0,628127128 |
| Colec12  | 0,03  | 0,982842179 | -0,05 | 0,987162042 | -0,57 | 0,772829778 | -1,99 | 0,007936109 | -0,53 | 0,257751018 |
| Colgalt1 | -0,64 | 0,11435382  | -0,62 | 0,143113166 | 0,98  | 0,090445769 | 0,89  | 0,037448594 | -0,34 | 0,567496057 |
| Colgalt2 | -0,89 | 0,077012562 | -1,14 | 0,282115927 | 0,59  | 0,461600894 | -1,55 | 0,086127301 | -0,96 | 0,137394562 |
| Colq     | -0,15 | 0,829070578 | -0,14 | 0,867324954 | -0,08 | 0,938771378 | 0,11  | 0,882948779 | -0,14 | 0,860292816 |
| Commd1   | 0,09  | 0,895870455 | -0,05 | 0,979876012 | 0,19  | 0,841723111 | 0,2   | 0,725169198 | 0,1   | 0,917766344 |
| Commd10  | -0,42 | 0,543834558 | -0,22 | 0,638366221 | 0,41  | 0,544756897 | 0,61  | 0,111319515 | 0,05  | 0,954892212 |
| Commd2   | -0,26 | 0,74672311  | -0,31 | 0,578047349 | 0,36  | 0,715497532 | 1,04  | 0,405933953 | 0,21  | 0,908003593 |
| Commd3   | -0,17 | 0,788032377 | -0,37 | 0,559630539 | 0,93  | 0,184686828 | 0,35  | 0,285728598 | 0,08  | 0,928764431 |
| Commd4   | 0,08  | 0,936354359 | -0,28 | 0,618895172 | 0,81  | 0,100828672 | 0,48  | 0,22844695  | -0,28 | 0,665405183 |
| Commd5   | 0,07  | 0,94881239  | -0,28 | 0,657423013 | 0,26  | 0,633398113 | 0,08  | 0,864263756 | -0,13 | 0,886027227 |
| Commd6   | 0,09  | 0,892559851 | 0,02  | 0,9777932   | 0,08  | 0,943788892 | 0,37  | 0,342248018 | 0,01  | 0,994774512 |
| Commd7   | -0,41 | 0,440729347 | -0,22 | 0,73274163  | 0,78  | 0,473293361 | 0,34  | 0,284374871 | -0,3  | 0,692784012 |
| Commd8   | -0,18 | 0,890205603 | 0,27  | 0,774567202 | 0,14  | 0,94110925  | 0,33  | 0,658373543 | -0,27 | 0,686695429 |
| Commd9   | 0,24  | 0,798227708 | -0,39 | 0,42942911  | 0,06  | 0,953975807 | 0,44  | 0,555564163 | -0,48 | 0,525387388 |
| Comp     | -0,04 | 0,970286316 | -0,02 | 0,982466032 | 0,06  | 0,954027146 | -0,18 | 0,795215066 | -0,2  | 0,824818547 |
| Comt     | -0,31 | 0,551155038 | 0,02  | 0,984831454 | -0,14 | 0,868609956 | 0,42  | 0,563131599 | 0,07  | 0,958361114 |
| Comtd1   | 0,02  | 0,98414566  | -0,34 | 0,785244931 | 0,05  | 0,959862254 | 0,32  | 0,759084609 | -0,25 | 0,62559702  |

|          |       |             |       |             |       |             |       |             |       |             |
|----------|-------|-------------|-------|-------------|-------|-------------|-------|-------------|-------|-------------|
| Copa     | -0,31 | 0,494884125 | -0,05 | 0,928134372 | 0,48  | 0,271482188 | 0,71  | 0,083359087 | -0,24 | 0,695556052 |
| Copb1    | -0,14 | 0,791021845 | -0,11 | 0,842663656 | 0,55  | 0,291085312 | 0,59  | 0,258593349 | 0,01  | 0,992694729 |
| Copb2    | -0,27 | 0,61932158  | -0,35 | 0,450412216 | 0,44  | 0,563934293 | 1,01  | 0,065441734 | 0,1   | 0,910083563 |
| Cope     | -0,13 | 0,752970477 | -0,12 | 0,842663656 | 0,48  | 0,308691805 | 0,34  | 0,532393687 | -0,11 | 0,897611151 |
| Copg1    | -0,41 | 0,412607475 | -0,34 | 0,436556718 | 0,68  | 0,134988022 | 0,72  | 0,060016564 | -0,27 | 0,590396118 |
| Copg2    | -0,05 | 0,941126856 | 0,29  | 0,676903594 | 0,44  | 0,374422909 | -0,14 | 0,87811903  | -0,3  | 0,789019303 |
| Copg2os2 | 0,09  | 0,856969531 | -0,26 | 0,702517334 | -0,02 | 0,989923808 | -0,11 | 0,783119247 | 0,24  | 0,750359224 |
| Coprs    | -0,35 | 0,682398233 | -0,14 | 0,827098118 | 0,5   | 0,433585844 | 0,13  | 0,84547151  | 0,19  | 0,84547704  |
| Cops2    | 0,06  | 0,906885053 | 0,16  | 0,790939978 | 0,38  | 0,589451508 | 0,58  | 0,123780343 | 0,95  | 0,043727018 |
| Cops3    | -0,08 | 0,858977038 | -0,18 | 0,672635059 | 0,52  | 0,508055997 | 0,02  | 0,977630854 | -0,14 | 0,828679046 |
| Cops4    | -0,29 | 0,50199908  | -0,22 | 0,752804236 | -0,06 | 0,935854369 | 0,45  | 0,514962191 | 0,19  | 0,842569065 |
| Cops5    | -0,15 | 0,768809729 | -0,25 | 0,627230934 | 0,38  | 0,420623892 | 1,24  | 0,013836074 | 0,25  | 0,613672291 |
| Cops6    | -0,17 | 0,720829271 | -0,31 | 0,487525834 | 0,28  | 0,715497532 | 0,63  | 0,276093686 | -0,11 | 0,916173996 |
| Cops7a   | -0,24 | 0,682102965 | -0,27 | 0,726652101 | 0,44  | 0,543291636 | 0,97  | 0,256722381 | -0,05 | 0,973685182 |
| Cops7b   | -0,15 | 0,918428949 | -0,22 | 0,707524747 | 0,15  | 0,918291931 | 0,41  | 0,279653873 | -0,32 | 0,64328563  |
| Cops8    | -0,4  | 0,340216054 | -0,07 | 0,912302387 | 0,57  | 0,55165888  | -0,26 | 0,555416428 | -0,65 | 0,215131944 |
| Copz1    | 0,15  | 0,793209485 | -0,15 | 0,804868131 | 0,54  | 0,545465016 | 0,98  | 0,069351821 | 0,1   | 0,954694993 |
| Copz2    | 0,02  | 0,989110761 | -0,19 | 0,80097084  | 0,19  | 0,882540073 | 0,41  | 0,370819816 | 0,19  | 0,832848337 |
| Coq10a   | -0,34 | 0,743090353 | 0,43  | 0,689193472 | -0,3  | 0,786838878 | -0,75 | 0,403948528 | -0,48 | 0,600537288 |
| Coq10b   | 0,13  | 0,848780666 | 0,03  | 0,977204386 | 0,09  | 0,930223445 | 0,25  | 0,676390381 | 0,22  | 0,807467277 |
| Coq2     | 0,15  | 0,8465448   | -0,37 | 0,715733316 | -0,52 | 0,702689055 | 0,79  | 0,738834503 | 0,62  | 0,802618378 |
| Coq3     | 0,05  | 0,951885977 | 0,38  | 0,483436169 | 0,27  | 0,859411859 | 0,09  | 0,915532343 | -0,4  | 0,640616198 |
| Coq4     | -0,07 | 0,896207658 | -0,2  | 0,825662099 | 0,1   | 0,920268328 | 0,2   | 0,671343347 | -0,43 | 0,42760723  |
| Coq5     | -0,76 | 0,194613044 | -0,6  | 0,333537535 | 0,45  | 0,742758388 | -0,1  | 0,929816391 | 0,04  | 0,979456872 |
| Coq6     | 0,03  | 0,970911991 | -0,01 | 0,997700959 | -0,3  | 0,628978443 | -0,11 | 0,825166016 | -0,41 | 0,459584226 |
| Coq7     | -0,32 | 0,642248731 | -0,79 | 0,35466662  | 0,78  | 0,37686469  | 0,01  | 0,986768223 | -0,66 | 0,391113982 |
| Coq9     | -0,11 | 0,849610824 | 0,02  | 0,98410255  | 0,06  | 0,965231065 | 0,1   | 0,882463873 | -0,19 | 0,830813323 |
| Corin    | 0,27  | 0,799145501 | 0,08  | 0,892869412 | 0,07  | 0,932577939 | -0,35 | 0,406444051 | -0,27 | 0,644393869 |
| Coro1a   | 0,08  | 0,924233976 | -0,36 | 0,608017374 | -0,22 | 0,816883729 | 0,63  | 0,083872642 | -0,2  | 0,769027593 |
| Coro1b   | -0,15 | 0,794033774 | 0,11  | 0,817661434 | 0,36  | 0,462123525 | 0,85  | 0,048593875 | 0,03  | 0,973428839 |
| Coro1c   | -0,39 | 0,401988646 | -0,4  | 0,385322607 | 0,37  | 0,362792817 | 0,74  | 0,171260893 | -0,48 | 0,498803884 |
| Coro2a   | 0,08  | 0,934482351 | 0,04  | 0,982786635 | 1,01  | 0,273645359 | -1,86 | 0,059841623 | -1,15 | 0,182703692 |
| Coro2b   | -0,77 | 0,151560276 | -0,98 | 0,35496087  | 0,51  | 0,493193538 | -1,31 | 0,026972102 | -0,99 | 0,058814936 |
| Coro6    | -0,2  | 0,764288636 | -0,17 | 0,825120426 | 0,49  | 0,576505498 | -1,46 | 0,131199513 | -1,42 | 0,172149526 |
| Coro7    | -0,04 | 0,956306223 | -0,23 | 0,587634717 | 0,35  | 0,478427765 | -0,07 | 0,929835301 | -0,59 | 0,307816931 |

|         |       |             |       |             |       |             |       |             |       |             |
|---------|-------|-------------|-------|-------------|-------|-------------|-------|-------------|-------|-------------|
| Cort    | 0,08  | 0,889867231 | -0,01 | 0,999395995 | -0,02 | 0,987563007 | -0,28 | 0,768796094 | 0,09  | 0,93957001  |
| Cotl1   | -0,72 | 0,156720401 | -0,81 | 0,129214485 | 0,76  | 0,17378444  | 1,88  | 0,011121575 | -0,18 | 0,792305774 |
| Cox10   | -0,96 | 0,270816598 | 0,06  | 0,948496432 | -0,04 | 0,984778342 | 0,99  | 0,191726739 | 0,02  | 0,992022739 |
| Cox11   | -0,32 | 0,757032046 | -0,82 | 0,493580894 | 0,85  | 0,34148526  | 0,21  | 0,696837631 | -0,15 | 0,864166878 |
| Cox14   | 0,4   | 0,354776657 | -0,03 | 0,950876136 | 0,27  | 0,659138896 | -0,15 | 0,807101657 | 0,23  | 0,75695866  |
| Cox15   | -0,82 | 0,137221178 | 0,09  | 0,935041212 | -0,15 | 0,907570167 | 0,1   | 0,890704966 | -0,18 | 0,813151491 |
| Cox16   | -0,13 | 0,894248924 | 0,02  | 0,985764487 | 0,48  | 0,330054927 | -0,06 | 0,900662145 | 0,05  | 0,95421799  |
| Cox17   | 0,39  | 0,36631183  | 0,16  | 0,725783826 | -0,22 | 0,727131283 | 0,08  | 0,886383641 | 0,28  | 0,661160894 |
| Cox18   | 0,44  | 0,521257161 | 0,44  | 0,609361686 | -0,41 | 0,542385406 | 0,67  | 0,409576257 | -0,19 | 0,885318142 |
| Cox19   | -0,16 | 0,856118781 | -0,08 | 0,932628106 | -0,17 | 0,859411859 | -0,07 | 0,920158794 | -0,14 | 0,861218943 |
| COX2    | 0,06  | 0,902939265 | -0,09 | 0,869734155 | -0,01 | 0,99147958  | -0,05 | 0,911768604 | -0,07 | 0,924431292 |
| Cox4i1  | 0,05  | 0,936139343 | -0,09 | 0,86411353  | 0,29  | 0,611144549 | -0,02 | 0,970931237 | -0,17 | 0,765809384 |
| Cox4i2  | -0,18 | 0,778869381 | 0,44  | 0,526101975 | -0,07 | 0,938378434 | -0,55 | 0,429195336 | 0,06  | 0,97206128  |
| Cox5a   | -0,05 | 0,926007268 | -0,24 | 0,630199793 | 0,52  | 0,326054745 | 0,56  | 0,169538994 | -0,07 | 0,939127163 |
| Cox5b   | -0,05 | 0,922464758 | -0,22 | 0,678357594 | 0,29  | 0,674253263 | 0,31  | 0,461824013 | -0,01 | 0,988084587 |
| Cox6a1  | 0,07  | 0,863441234 | -0,14 | 0,756369219 | 0,26  | 0,57717258  | 0,04  | 0,955434247 | -0,15 | 0,846003361 |
| Cox6a2  | 0,17  | 0,81313264  | 0,09  | 0,872911699 | -0,21 | 0,782182029 | 0,26  | 0,547475705 | 0,47  | 0,495065595 |
| Cox6b1  | -0,04 | 0,962810563 | -0,18 | 0,729194445 | 0,41  | 0,631951499 | 0,52  | 0,181859963 | -0,18 | 0,776907684 |
| Cox6b2  | -0,15 | 0,843206054 | -0,5  | 0,424863079 | -0,06 | 0,927978381 | -0,09 | 0,88283334  | -0,04 | 0,979152939 |
| Cox6c   | -0,02 | 0,971245076 | -0,06 | 0,899624796 | 0,32  | 0,537929759 | 0,52  | 0,184464257 | -0,14 | 0,854369491 |
| Cox7a1  | 0,35  | 0,692923111 | -0,27 | 0,750574439 | 0,31  | 0,66225859  | -0,44 | 0,627687724 | 0,38  | 0,657180823 |
| Cox7a2  | 0,01  | 0,98297164  | -0,08 | 0,855974935 | 0,13  | 0,82622365  | 0,08  | 0,830247309 | 0,2   | 0,702558142 |
| Cox7a2l | 0,09  | 0,839471353 | 0,46  | 0,250869803 | -0,2  | 0,742758388 | -0,25 | 0,707865877 | -0,06 | 0,951236192 |
| Cox7b   | 0,24  | 0,602743235 | -0,03 | 0,9588885   | 0,25  | 0,727262258 | 0,93  | 0,067995935 | 0,44  | 0,431243614 |
| Cox7b2  | 0,36  | 0,419481733 | 0,13  | 0,852461907 | 0,05  | 0,955257293 | -0,04 | 0,947551542 | 0,13  | 0,885149287 |
| Cox8a   | -0,01 | 0,984759626 | -0,07 | 0,910041634 | 0,28  | 0,602259493 | 0,22  | 0,48728376  | -0,21 | 0,722548628 |
| Cox8b   | -0,08 | 0,934081073 | -0,32 | 0,860987237 | 0,09  | 0,925195648 | 0,16  | 0,884352208 | 0,21  | 0,861977667 |
| Cox8c   | 0,36  | 0,430723846 | 0,12  | 0,815973308 | 0,1   | 0,922971065 | -0,37 | 0,249212736 | 0,21  | 0,778656578 |
| Cp      | -0,06 | 0,970660999 | 1,88  | 0,153524445 | -0,41 | 0,727131283 | -3,91 | 0,007066851 | 0,39  | 0,651690564 |
| Cpa1    | 0     | 0,998075139 | -0,34 | 0,716437544 | 0,1   | 0,931899359 | -0,09 | 0,832134224 | 0,03  | 0,978550794 |
| Cpa2    | -0,96 | 0,501682835 | -0,35 | 0,792112243 | 1,01  | 0,399470425 | 0,83  | 0,288257045 | -0,32 | 0,789505562 |
| Cpa3    | 0,77  | 0,487025111 | 0,21  | 0,897859783 | -1,04 | 0,805783058 | -0,28 | 0,767937787 | -0,27 | 0,693130577 |
| Cpa4    | 0,29  | 0,450520646 | 0,01  | 0,994137877 | -0,08 | 0,941627748 | -0,03 | 0,967866794 | -0,11 | 0,917356423 |
| Cpa5    | 0,53  | 0,52759316  | -0,12 | 0,898952381 | -0,08 | 0,906709737 | 0,2   | 0,789717483 | 0,01  | 0,994774512 |
| Cpa6    | -0,2  | 0,819634768 | -0,45 | 0,66616142  | 0,2   | 0,829543101 | 0,73  | 0,113007982 | -0,03 | 0,977945762 |

|        |       |             |       |             |       |             |       |             |       |             |
|--------|-------|-------------|-------|-------------|-------|-------------|-------|-------------|-------|-------------|
| Cpb1   | -0,11 | 0,812230622 | -0,13 | 0,805522187 | -0,07 | 0,94930407  | -0,03 | 0,944769683 | -0,13 | 0,865258929 |
| Cpb2   | 0,24  | 0,865055523 | 0,14  | 0,928961063 | 0,18  | 0,844854601 | -0,35 | 0,62296101  | -0,44 | 0,590196048 |
| Cpd    | -0,32 | 0,42717379  | -0,05 | 0,928134372 | 0,32  | 0,491022708 | -0,82 | 0,094204582 | -0,11 | 0,904371266 |
| Cpe    | -0,73 | 0,083335073 | 0,66  | 0,728434379 | 0,71  | 0,528008802 | -0,11 | 0,94744694  | 0,09  | 0,974110019 |
| Cpeb1  | -0,48 | 0,824525908 | -0,34 | 0,843162191 | 0,73  | 0,635864143 | 0,87  | 0,380397997 | 0,37  | 0,699059557 |
| Cpeb2  | 0,44  | 0,268283142 | 0,61  | 0,345535775 | -0,28 | 0,806044178 | 0,07  | 0,907425361 | -0,18 | 0,827532593 |
| Cpeb3  | 0,04  | 0,957398577 | 0,56  | 0,568282579 | -0,1  | 0,940550094 | -0,03 | 0,983166423 | -0,2  | 0,91314596  |
| Cpeb4  | 0,06  | 0,955200574 | 0,13  | 0,827496723 | 0,1   | 0,930193129 | 0,35  | 0,552176956 | 0,4   | 0,619416028 |
| Cped1  | -0,27 | 0,705314696 | -0,39 | 0,728434379 | -0,17 | 0,926974012 | -3,91 | 0,007738248 | -0,4  | 0,633801825 |
| Cphx1  | -0,02 | 0,976574175 | 0,09  | 0,888802342 | -0,05 | 0,933297829 | -0,14 | 0,715042501 | 0,05  | 0,957981129 |
| Cplx1  | -0,5  | 0,234648085 | -0,16 | 0,716668427 | -0,18 | 0,73484021  | 0,3   | 0,677674923 | -0,19 | 0,860292816 |
| Cplx2  | -0,05 | 0,932324918 | 0,04  | 0,945143056 | -0,05 | 0,955245684 | 0,35  | 0,28093028  | 0,08  | 0,915531686 |
| Cplx3  | 0     | 0,999536558 | -0,38 | 0,432039457 | -0,42 | 0,475944471 | 0,32  | 0,657996279 | -0,16 | 0,862466319 |
| Cplx4  | 0,12  | 0,807062435 | 0,15  | 0,864989815 | 0,05  | 0,963775512 | -0,16 | 0,770010922 | 0,1   | 0,917844354 |
| Cpm    | 0,28  | 0,785864159 | -0,16 | 0,911024505 | 0,72  | 0,227929911 | -1,13 | 0,480910924 | -0,26 | 0,922921816 |
| Cpn1   | 0,04  | 0,976314749 | -0,15 | 0,789748414 | -0,43 | 0,323246778 | -0,08 | 0,91064124  | 0,21  | 0,848977077 |
| Cpn2   | 0,07  | 0,930612466 | 0,34  | 0,620187279 | -0,34 | 0,628978443 | 0,01  | 0,996714438 | 0,22  | 0,771923129 |
| Cpne1  | -0,49 | 0,244269955 | 0     | 1           | 0,5   | 0,387573388 | -0,16 | 0,816053567 | -0,56 | 0,332695011 |
| Cpne2  | -0,31 | 0,596550801 | 0,13  | 0,808498635 | -0,29 | 0,823478881 | -1,01 | 0,02067712  | -0,54 | 0,213778544 |
| Cpne3  | 0,01  | 0,989017567 | 0,33  | 0,41640882  | 0,2   | 0,720891444 | -0,52 | 0,169686402 | 0,1   | 0,904684159 |
| Cpne4  | -0,2  | 0,733257266 | 0,25  | 0,710843986 | -0,28 | 0,641439342 | 0,03  | 0,960747562 | -0,12 | 0,890957032 |
| Cpne5  | 0,39  | 0,673516656 | 0,33  | 0,774089094 | -0,35 | 0,672766751 | -0,29 | 0,535627157 | 0,06  | 0,97206128  |
| Cpne6  | -0,07 | 0,914090929 | -0,13 | 0,785244931 | -0,11 | 0,918644218 | -0,29 | 0,563786734 | -0,24 | 0,713744672 |
| Cpne7  | -0,4  | 0,475668819 | 0,47  | 0,485712513 | -0,38 | 0,82162081  | -0,13 | 0,87148686  | -0,1  | 0,937495642 |
| Cpne8  | -0,57 | 0,237786455 | -0,11 | 0,800739778 | -0,28 | 0,702978742 | -0,44 | 0,266921098 | 0,13  | 0,86229485  |
| Cpne9  | 0,56  | 0,608307071 | 0,41  | 0,641094649 | -0,24 | 0,69423863  | 0,05  | 0,944769683 | -0,17 | 0,825272094 |
| Cpox   | -0,5  | 0,673291416 | 0,03  | 0,992383215 | 0,3   | 0,760531859 | -0,51 | 0,467733865 | -0,72 | 0,42105078  |
| Cpped1 | -0,53 | 0,228584744 | -0,43 | 0,474106654 | 0,24  | 0,871603067 | 0,36  | 0,679521333 | -0,29 | 0,800540569 |
| Cpq    | 0,2   | 0,833900133 | 0,12  | 0,852461907 | -0,24 | 0,907926202 | 0,6   | 0,351862282 | -0,07 | 0,950267521 |
| Cps1   | 0,32  | 0,663318436 | 0,19  | 0,773044896 | -0,22 | 0,738804472 | -0,01 | 0,992906132 | 0,3   | 0,590396118 |
| Cpsf1  | -0,51 | 0,377372764 | -0,16 | 0,765325717 | 0,04  | 0,963221639 | 0,05  | 0,926386785 | -0,3  | 0,583535515 |
| Cpsf2  | -0,35 | 0,482077988 | -0,11 | 0,923620953 | -0,11 | 0,907353858 | 1,07  | 0,406444051 | 0,65  | 0,649846438 |
| Cpsf3  | -0,28 | 0,631448839 | -0,21 | 0,639737089 | 0,31  | 0,676936654 | 0,1   | 0,830299574 | -0,41 | 0,424134691 |
| Cpsf3l | -0,06 | 0,922118639 | -0,18 | 0,784390856 | 0,89  | 0,116607178 | 0,25  | 0,577722004 | -0,4  | 0,421255613 |
| Cpsf4  | -0,21 | 0,786654245 | -0,2  | 0,702804107 | 0,42  | 0,563650445 | -0,02 | 0,986544789 | -0,18 | 0,855281866 |

|         |       |             |       |             |       |             |       |             |       |             |
|---------|-------|-------------|-------|-------------|-------|-------------|-------|-------------|-------|-------------|
| Cpsf4l  | -0,53 | 0,322835282 | -0,61 | 0,410501758 | -0,14 | 0,904057901 | 0,76  | 0,256929145 | -0,06 | 0,954657649 |
| Cpsf6   | -0,35 | 0,430723846 | 0,32  | 0,515486999 | 0,1   | 0,921228738 | 0,45  | 0,389365602 | 0,41  | 0,574285481 |
| Cpsf7   | -0,15 | 0,750694068 | 0,15  | 0,828219939 | -0,18 | 0,737528157 | -0,38 | 0,336483286 | 0,17  | 0,822709063 |
| Cpt1a   | -0,12 | 0,876935395 | -0,15 | 0,831580851 | 0,13  | 0,939590181 | -0,69 | 0,171299356 | -0,28 | 0,663851605 |
| Cpt1b   | -0,21 | 0,820023436 | 0,31  | 0,761413306 | 0,59  | 0,65482519  | -0,9  | 0,197760953 | -0,37 | 0,707881039 |
| Cpt1c   | -0,27 | 0,659879365 | 0,41  | 0,503738642 | 0,09  | 0,90672161  | -0,26 | 0,687065334 | -0,07 | 0,951236192 |
| Cpt2    | -0,11 | 0,79498488  | -0,03 | 0,970762922 | 0,36  | 0,684455958 | 0,31  | 0,632632139 | -0,05 | 0,969994712 |
| Cptp    | 0,02  | 0,981400637 | 0,08  | 0,927205716 | 0,6   | 0,543291636 | 0,71  | 0,345820261 | 0,35  | 0,574285481 |
| Cpvl    | -0,12 | 0,867243066 | 0,15  | 0,844512244 | 0,12  | 0,894040977 | -0,63 | 0,161809117 | 0,52  | 0,697336851 |
| Cpxcr1  | 0,07  | 0,897455401 | -0,09 | 0,895283798 | 0,22  | 0,670651232 | 0,11  | 0,809705788 | 0,04  | 0,962525821 |
| Cpxm1   | 0,2   | 0,841140165 | 0,39  | 0,610418322 | 0,27  | 0,779859477 | 0,22  | 0,691600442 | 0,27  | 0,640213665 |
| Cpxm2   | -0,33 | 0,69373851  | 0,18  | 0,877840602 | 0,18  | 0,856863069 | -1,64 | 0,106129389 | -1,15 | 0,277447641 |
| Cpz     | 0,02  | 0,98456417  | -0,01 | 0,998370003 | -0,24 | 0,726640095 | -0,15 | 0,763593883 | -0,24 | 0,6689305   |
| Cr1l    | 0,53  | 0,269906821 | 0,02  | 0,980385701 | -0,15 | 0,83442082  | -0,38 | 0,235946696 | -0,09 | 0,890957032 |
| Cr2     | 0,27  | 0,739638841 | -0,02 | 0,996113371 | 0,18  | 0,865145801 | 0,22  | 0,80718406  | -0,1  | 0,946155238 |
| Crabp1  | -0,31 | 0,834694985 | -0,54 | 0,468402736 | 0,36  | 0,68989337  | 0,38  | 0,535573932 | 0,11  | 0,937558003 |
| Crabp2  | 0,29  | 0,853594835 | 0,59  | 0,43063312  | 0,42  | 0,750826735 | 0,08  | 0,939446012 | 0,26  | 0,853369265 |
| Cracr2a | -0,16 | 0,801386084 | -0,22 | 0,695689103 | -0,15 | 0,788534186 | -0,16 | 0,720771459 | -0,29 | 0,587735967 |
| Cracr2b | 0,32  | 0,51395421  | 0,29  | 0,688122654 | -0,28 | 0,574149818 | -0,28 | 0,688800416 | -0,59 | 0,497822977 |
| Cradd   | -0,45 | 0,699193038 | 0,43  | 0,737619279 | 0,31  | 0,770581496 | -1,73 | 0,023891409 | -0,39 | 0,669861917 |
| Cramp1l | -0,09 | 0,909477787 | 0,25  | 0,604952735 | -0,11 | 0,907951869 | -0,22 | 0,779547737 | -0,46 | 0,561977785 |
| Crat    | -0,09 | 0,886889675 | 0,28  | 0,547271497 | 0,34  | 0,660920525 | -0,64 | 0,078238769 | -0,73 | 0,104257693 |
| Crb1    | -0,03 | 0,966775766 | -0,21 | 0,808772481 | -0,01 | 0,99416325  | 0,21  | 0,746580621 | 0,08  | 0,939448119 |
| Crb2    | 0,11  | 0,869203411 | -0,14 | 0,862088357 | -0,04 | 0,963199274 | -0,13 | 0,900618083 | -0,2  | 0,84970727  |
| Crb3    | 0,44  | 0,210748322 | -0,06 | 0,945980281 | 1,15  | 0,109746514 | -0,15 | 0,854211942 | -0,33 | 0,679432447 |
| Crbn    | 0,12  | 0,863048221 | 0,45  | 0,399286015 | -0,81 | 0,229595171 | -0,64 | 0,19247613  | 0,14  | 0,861506431 |
| Crcp    | -0,68 | 0,38838066  | -0,08 | 0,906953729 | 0,23  | 0,791940256 | 0,75  | 0,487556882 | 0,16  | 0,928724353 |
| Crct1   | 0,27  | 0,474484584 | 0,6   | 0,314703215 | 0,28  | 0,698492886 | 0,2   | 0,679072518 | 0,37  | 0,728455827 |
| Creb1   | 0,04  | 0,949868652 | 0,41  | 0,439108392 | -0,13 | 0,836328669 | -0,19 | 0,645842474 | 0,1   | 0,884248437 |
| Creb3   | 0,54  | 0,357036798 | 0,14  | 0,786405071 | 0     | 0,997394645 | 0,35  | 0,653400029 | 0,26  | 0,801087157 |
| Creb3l1 | 0,55  | 0,36631183  | 0,45  | 0,571014364 | 0,33  | 0,714376082 | -0,1  | 0,877956522 | -0,51 | 0,287947035 |
| Creb3l2 | -0,37 | 0,402954668 | -0,53 | 0,324369036 | 0,26  | 0,654328013 | 1,45  | 0,014532437 | -0,32 | 0,565381364 |
| Creb3l3 | -0,29 | 0,792735264 | 0,16  | 0,696346398 | 0,07  | 0,927950027 | 0,42  | 0,287208765 | 0,01  | 0,9939542   |
| Creb3l4 | 0,24  | 0,80548452  | 0,97  | 0,200639194 | -0,48 | 0,503729732 | -1,42 | 0,342811747 | -0,48 | 0,765809384 |
| Creb5   | -0,05 | 0,963914207 | 0,08  | 0,930242005 | 0,72  | 0,309719239 | 0,5   | 0,715821479 | -0,72 | 0,469148703 |

|          |       |             |       |             |       |             |       |             |       |             |
|----------|-------|-------------|-------|-------------|-------|-------------|-------|-------------|-------|-------------|
| Crebbp   | 0,18  | 0,642618049 | 0,08  | 0,891749049 | 0,18  | 0,773365699 | -0,4  | 0,256328572 | 0,06  | 0,940125698 |
| Crebl2   | -0,49 | 0,184172097 | -0,15 | 0,839195196 | 0,09  | 0,920858287 | -0,43 | 0,503737108 | 0,16  | 0,884640084 |
| Crebrf   | 0,56  | 0,244943537 | 0,33  | 0,89034555  | -0,93 | 0,395119584 | -1,47 | 0,203390007 | 0,78  | 0,258820768 |
| Crebzf   | -0,67 | 0,207578337 | -0,17 | 0,74882322  | -0,02 | 0,991255289 | 0,88  | 0,280843942 | 0,36  | 0,772971095 |
| Creg1    | -0,52 | 0,641357042 | -0,57 | 0,459417799 | 0,13  | 0,914354795 | -0,06 | 0,929298927 | -0,21 | 0,801087157 |
| Creg2    | -0,35 | 0,566131631 | -0,19 | 0,767178812 | 0,32  | 0,620445455 | -0,03 | 0,97666971  | 0,03  | 0,979392852 |
| Creld1   | 0,65  | 0,314547808 | -0,15 | 0,885546436 | -0,24 | 0,838718162 | 0,34  | 0,525192806 | 0,43  | 0,541900717 |
| Creld2   | 0,62  | 0,321181267 | 0,08  | 0,907186434 | 0,03  | 0,970338547 | 0,67  | 0,524330238 | 1,05  | 0,276336726 |
| Crem     | -0,02 | 0,985980321 | 0,06  | 0,915282997 | -0,9  | 0,199678278 | 0,15  | 0,691147947 | 0,83  | 0,074506144 |
| Crh      | 0,09  | 0,844505959 | -0,27 | 0,717526173 | -0,14 | 0,785676028 | 0,08  | 0,8914104   | 0,13  | 0,845872843 |
| Crhbp    | -0,07 | 0,948926586 | -0,15 | 0,779768602 | -0,12 | 0,934813979 | 1,05  | 0,062904502 | -0,17 | 0,827532593 |
| Crhr1    | -0,05 | 0,948926586 | -0,07 | 0,936322898 | -0,16 | 0,873625536 | -0,18 | 0,736251815 | 0,28  | 0,632512973 |
| Crhr2    | 0,14  | 0,874688734 | -0,2  | 0,812432185 | -0,17 | 0,800162809 | 0,21  | 0,831218851 | -0,04 | 0,976743304 |
| Crim1    | 0,03  | 0,963738499 | -0,08 | 0,884434898 | -0,22 | 0,633244842 | -0,14 | 0,686761475 | 0,36  | 0,445533492 |
| Crip1    | -0,72 | 0,231812139 | -1,24 | 0,104457339 | 1,18  | 0,077626926 | -0,8  | 0,121231601 | -0,65 | 0,202369779 |
| Crip2    | -0,25 | 0,624610207 | -0,5  | 0,261045839 | 0,62  | 0,371125662 | -0,17 | 0,660660272 | -0,5  | 0,262468548 |
| Crip3    | 0     | 0,998027251 | -0,23 | 0,764289173 | -0,25 | 0,700259013 | 0,2   | 0,688152796 | 0,01  | 0,992370267 |
| Cript    | 0,13  | 0,836559066 | 0,04  | 0,936693859 | 0,32  | 0,541560473 | 0,44  | 0,261475442 | 0,27  | 0,6441349   |
| Crisp1   | 0,2   | 0,672934635 | 0,29  | 0,656542439 | -0,17 | 0,847564027 | -0,26 | 0,580513589 | -0,09 | 0,939127163 |
| Crisp2   | 0,15  | 0,898269435 | 0,2   | 0,702457452 | 0,01  | 0,997268369 | -0,06 | 0,968266606 | 0,28  | 0,841763929 |
| Crisp3   | 0,24  | 0,686076441 | 0,16  | 0,871482791 | -0,27 | 0,56948206  | 0,17  | 0,744192679 | 0,47  | 0,592992867 |
| Crisp4   | 0,36  | 0,531315808 | 0,36  | 0,651587568 | 0,21  | 0,770526999 | 0,38  | 0,557215591 | 0,13  | 0,891011128 |
| Crispld1 | -0,26 | 0,615961193 | -0,17 | 0,699782231 | 0,03  | 0,976092199 | -3    | 0,003907268 | -0,61 | 0,420494653 |
| Crispld2 | 0,25  | 0,814334273 | 0,06  | 0,934280572 | 0,05  | 0,959981309 | -0,61 | 0,171282602 | -0,35 | 0,554975763 |
| Crk      | -0,04 | 0,94918265  | -0,04 | 0,935329426 | 0,23  | 0,680127367 | 0,71  | 0,069836293 | 0,25  | 0,757342197 |
| Crkl     | 0,03  | 0,958821517 | 0,31  | 0,514228058 | -0,37 | 0,375777962 | -0,07 | 0,891773132 | 0,35  | 0,46990734  |
| Crif1    | -0,29 | 0,606922012 | -0,08 | 0,883093763 | 0,08  | 0,947117869 | 0,17  | 0,744773464 | -0,03 | 0,981079016 |
| Crif2    | 0,5   | 0,269151748 | 0,17  | 0,74245372  | -0,35 | 0,611144549 | 0,32  | 0,626545838 | 0,37  | 0,601126121 |
| Crif3    | -0,05 | 0,927051853 | 0,07  | 0,956441911 | 0,1   | 0,896854446 | 0,19  | 0,893958719 | 0,01  | 0,996197742 |
| Crls1    | -0,3  | 0,620361515 | 0,28  | 0,509013394 | 0,33  | 0,770526999 | -0,19 | 0,617807402 | 0,37  | 0,59665978  |
| Crmp1    | -1,32 | 0,266774747 | 0,27  | 0,610418322 | 0,22  | 0,8290371   | 1,01  | 0,035771101 | 0,14  | 0,874829878 |
| Crnde    | 0,65  | 0,255702287 | 0,14  | 0,763005394 | -0,39 | 0,554933299 | -2,42 | 0,010692197 | -0,19 | 0,83638448  |
| Crnkl1   | -0,1  | 0,910211895 | -0,01 | 0,998923508 | 0,28  | 0,786553108 | -1,01 | 0,043613742 | -0,56 | 0,664197122 |
| Cmn      | -0,21 | 0,656726345 | -0,21 | 0,708738408 | 0,09  | 0,932577939 | -0,09 | 0,891790388 | -0,04 | 0,976743304 |
| Crocc    | 0,06  | 0,912573929 | -0,33 | 0,610894291 | -0,2  | 0,746397133 | -0,05 | 0,947028438 | -0,2  | 0,832736649 |

|        |       |             |       |             |       |             |       |             |       |             |
|--------|-------|-------------|-------|-------------|-------|-------------|-------|-------------|-------|-------------|
| Crocc2 | 0     | 0,997979962 | -0,07 | 0,935329426 | -0,06 | 0,943934563 | 0,13  | 0,777673386 | -0,13 | 0,864540232 |
| Crot   | -0,13 | 0,923937847 | 1,22  | 0,16297303  | 0,89  | 0,475629395 | -0,26 | 0,417679727 | 0,07  | 0,967522546 |
| Crp    | -0,11 | 0,856118781 | 0,23  | 0,558135871 | -0,17 | 0,849342965 | -0,23 | 0,530656838 | 0     | 0,998883409 |
| Crtac1 | 0,4   | 0,508006897 | 0,1   | 0,925982374 | 0,06  | 0,948192096 | -0,29 | 0,606342076 | -0,42 | 0,558817182 |
| Crtam  | 0,04  | 0,97382475  | 0,24  | 0,756267547 | -0,26 | 0,608702079 | -0,02 | 0,986768223 | -0,02 | 0,989240648 |
| Crtap  | -0,22 | 0,622175371 | -0,33 | 0,419795665 | 0,46  | 0,446493846 | 0,38  | 0,31191739  | -0,99 | 0,163177787 |
| Crtc1  | 0,18  | 0,851543807 | 0     | 1           | 0,07  | 0,967767582 | -0,87 | 0,046473133 | -0,56 | 0,246735173 |
| Crtc2  | -0,02 | 0,98297164  | 0,11  | 0,89545828  | -0,28 | 0,61190379  | -0,5  | 0,601996277 | 0,08  | 0,954694993 |
| Crtc3  | -0,27 | 0,578185633 | -0,48 | 0,305866517 | 0,38  | 0,557290334 | 0,81  | 0,043583743 | -0,25 | 0,677222415 |
| Crx    | -0,03 | 0,98225675  | -0,91 | 0,669338008 | -0,13 | 0,899296785 | 0,37  | 0,855511381 | -0,03 | 0,982321176 |
| Crxos  | 0,03  | 0,98456417  | 0,05  | 0,980743334 | -0,65 | 0,36401558  | 0,14  | 0,943143586 | -0,05 | 0,980961333 |
| Cry1   | -0,04 | 0,98456417  | 0,12  | 0,894571363 | 0,08  | 0,947460329 | 0,44  | 0,466105465 | 0,05  | 0,973685182 |
| Cry2   | -0,42 | 0,419137666 | -0,05 | 0,973449551 | 0,18  | 0,856382208 | -0,2  | 0,741452902 | -0,73 | 0,268703371 |
| Cryaa  | -0,03 | 0,964154899 | -0,21 | 0,837500541 | 0,04  | 0,964423425 | 0,14  | 0,800853287 | 0,02  | 0,98502805  |
| Cryab  | -0,27 | 0,832696131 | 0,07  | 0,983071427 | -0,29 | 0,68098106  | -3,53 | 0,013116308 | 0,42  | 0,759432231 |
| Cryba1 | -0,48 | 0,600316691 | -0,31 | 0,725431195 | -0,32 | 0,485917439 | 0,48  | 0,373645618 | -0,26 | 0,734230208 |
| Cryba2 | -0,2  | 0,7494877   | 0,14  | 0,818301748 | 0,03  | 0,973813725 | 0,15  | 0,808330986 | 0,29  | 0,696704247 |
| Cryba4 | 0,15  | 0,764288636 | -0,1  | 0,827228251 | -0,07 | 0,944441051 | -0,82 | 0,16197969  | -0,65 | 0,374616846 |
| Crybb1 | 0,09  | 0,903817676 | 0,15  | 0,910702605 | -0,18 | 0,807402106 | 0,03  | 0,967758979 | 0,04  | 0,965244101 |
| Crybb2 | -0,23 | 0,652819827 | 0,03  | 0,985764487 | 0,09  | 0,941254389 | 0,07  | 0,924178857 | 0,18  | 0,757239026 |
| Crybb3 | 0,08  | 0,921628755 | -0,6  | 0,51825831  | 0,46  | 0,452410597 | 0,51  | 0,267446045 | -0,33 | 0,655956123 |
| Crybg3 | 0,42  | 0,399257539 | 0,01  | 0,99460836  | 0,1   | 0,955376265 | 0,14  | 0,889279498 | -0,03 | 0,984125319 |
| Cryga  | 0,16  | 0,882943798 | -0,02 | 0,998513452 | -0,07 | 0,945583021 | 0,56  | 0,412205005 | -0,1  | 0,932627212 |
| Crygb  | -0,16 | 0,81630789  | 0,21  | 0,698886888 | 0,18  | 0,72902724  | 0,27  | 0,373645618 | 0,43  | 0,435285665 |
| Crygc  | 0,01  | 0,994126393 | -0,23 | 0,775481608 | -0,13 | 0,864478769 | 0,23  | 0,642906557 | -0,23 | 0,745574572 |
| Crygd  | 0,15  | 0,783200207 | 0,52  | 0,656204868 | -0,27 | 0,628048897 | -0,77 | 0,171773102 | 0,31  | 0,578214087 |
| Cryge  | -0,26 | 0,688964688 | -0,39 | 0,421936856 | 0,04  | 0,961573489 | 0,29  | 0,648210507 | -0,11 | 0,913274952 |
| Crygf  | 0,15  | 0,717407143 | 0,05  | 0,92798337  | -0,16 | 0,803333635 | 0,02  | 0,961864701 | 0,15  | 0,838458737 |
| Crygn  | -0,12 | 0,869225685 | -0,11 | 0,927582737 | 0,02  | 0,990836784 | -0,5  | 0,330198303 | -0,18 | 0,811975973 |
| Crygs  | 0,13  | 0,847070804 | 0,41  | 0,436556718 | 0,11  | 0,888956864 | -0,13 | 0,73667158  | 0,24  | 0,673577848 |
| Cryl1  | -1,1  | 0,06958443  | -0,92 | 0,329880449 | -0,04 | 0,985326269 | -0,12 | 0,912078518 | -0,02 | 0,991437885 |
| Crym   | -0,2  | 0,765464964 | -0,04 | 0,951375162 | -0,24 | 0,663785582 | 0,17  | 0,696449006 | 0,26  | 0,647876293 |
| Cryz   | 0,5   | 0,282939873 | 0,2   | 0,843313499 | 0,38  | 0,788263753 | 0,64  | 0,461182914 | -0,6  | 0,5803138   |
| Cryzl1 | -0,19 | 0,797266879 | -0,15 | 0,86297915  | 0,02  | 0,993379272 | 0     | 0,999809258 | 0,28  | 0,765809384 |
| Cs     | -0,05 | 0,948926586 | -0,37 | 0,571026746 | 0,31  | 0,63450037  | 0,67  | 0,501725635 | -0,13 | 0,936278784 |



|            |       |             |       |             |       |             |       |             |       |             |
|------------|-------|-------------|-------|-------------|-------|-------------|-------|-------------|-------|-------------|
| Csad       | -0,21 | 0,764288636 | -0,14 | 0,804543872 | 0,6   | 0,512398053 | -0,59 | 0,168511724 | -0,53 | 0,38958828  |
| Csdc2      | -0,13 | 0,832889444 | -0,19 | 0,74583457  | -0,26 | 0,746397133 | -0,07 | 0,960617931 | 0     | 0,998746436 |
| Csde1      | 0,01  | 0,9852886   | 0,03  | 0,978741224 | -0,03 | 0,972847253 | 0,12  | 0,811006924 | 0,31  | 0,562557824 |
| Cse1l      | -0,32 | 0,617280733 | -0,94 | 0,325242663 | 0,52  | 0,26430961  | 0,61  | 0,252858677 | -0,22 | 0,779920985 |
| Csf1       | 0,43  | 0,647055678 | 0,66  | 0,164189612 | -0,41 | 0,598179126 | -0,54 | 0,297818144 | 0,71  | 0,221194817 |
| Csf1r      | 0,09  | 0,948926586 | -0,32 | 0,765982952 | 0,72  | 0,509702247 | 0,5   | 0,371291585 | -0,4  | 0,447019099 |
| Csf2       | -0,73 | 0,41159936  | -0,93 | 0,609522549 | 2,58  | 0,061544289 | 0,84  | 0,08326794  | 0,27  | 0,697757911 |
| Csf2ra     | -0,1  | 0,871580532 | -0,02 | 0,982420791 | 0,34  | 0,605049228 | -0,18 | 0,740510034 | 0,11  | 0,91252831  |
| Csf2rb     | -0,32 | 0,54401985  | -0,15 | 0,735554037 | 0,29  | 0,777417583 | 0,42  | 0,572577303 | -0,04 | 0,978556079 |
| Csf2rb2    | -0,25 | 0,649182131 | -0,32 | 0,667097376 | 0,1   | 0,942067055 | -0,13 | 0,883783927 | -0,03 | 0,981677577 |
| Csf3       | -0,73 | 0,338600476 | -0,59 | 0,554897489 | 1,32  | 0,046696595 | -0,28 | 0,6447962   | -0,16 | 0,935732697 |
| Csf3r      | -0,37 | 0,509142316 | 0,42  | 0,510894317 | 0,66  | 0,737821076 | -0,83 | 0,103839511 | 0,11  | 0,950308536 |
| Csgalnact1 | 0,09  | 0,939422298 | -0,12 | 0,927205716 | 0,11  | 0,956894731 | 0,31  | 0,730222814 | -0,68 | 0,481292339 |
| Csgalnact2 | 0,32  | 0,829299665 | -0,17 | 0,826636886 | 0,56  | 0,476920529 | -0,57 | 0,461824013 | 0,09  | 0,955151093 |
| Csk        | -0,12 | 0,798561927 | 0,02  | 0,989873399 | 0,2   | 0,805783058 | 0,16  | 0,891204936 | -0,07 | 0,961406182 |
| Csl        | -0,2  | 0,847575977 | -0,13 | 0,859998034 | 0,26  | 0,835677021 | -0,15 | 0,901395825 | 0,52  | 0,68987325  |
| Csmd1      | 0,05  | 0,964272364 | 0,02  | 0,990088847 | -0,13 | 0,867543859 | -0,3  | 0,482313559 | -0,05 | 0,958361114 |
| Csmd2      | 0,09  | 0,888623724 | 0,29  | 0,674709201 | 0,15  | 0,82104737  | 0,42  | 0,503825028 | 0,42  | 0,507222763 |
| Csmd2os    | 0,29  | 0,619769947 | -0,01 | 0,994424327 | 0,05  | 0,963199274 | 0,2   | 0,726463293 | -0,14 | 0,849670841 |
| Csmd3      | -0,04 | 0,960720096 | -0,03 | 0,968437059 | -0,09 | 0,89935302  | -0,13 | 0,800384828 | 0,05  | 0,954657649 |
| Csn1s1     | -0,1  | 0,87840123  | 0,17  | 0,800850449 | -0,06 | 0,940543595 | -0,1  | 0,870284642 | 0,01  | 0,992370267 |
| Csn1s2a    | 0,27  | 0,791959729 | 0,56  | 0,393855735 | -0,21 | 0,841669036 | -0,64 | 0,433167307 | 0,02  | 0,984125319 |
| Csn1s2b    | 0,01  | 0,991967566 | -0,11 | 0,874448335 | -0,25 | 0,66602791  | -0,3  | 0,482327842 | -0,41 | 0,498803884 |
| Csn2       | 0,02  | 0,992615147 | -0,3  | 0,900801202 | -0,53 | 0,650923782 | 0,42  | 0,80341881  | 0,85  | 0,554975763 |
| Csn3       | 2,1   | 0,053226128 | 1,19  | 0,229092429 | 0,88  | 0,328009827 | 0,31  | 0,562163333 | -0,29 | 0,747104009 |
| Csnk1a1    | -0,25 | 0,579444251 | 0,07  | 0,892869412 | 0,15  | 0,765816672 | -0,02 | 0,972627967 | -0,24 | 0,649849091 |
| Csnk1d     | -0,05 | 0,921306075 | 0,03  | 0,958545812 | -0,02 | 0,975055092 | 0,4   | 0,18591252  | -0,1  | 0,890555696 |
| Csnk1e     | -0,36 | 0,577809864 | -0,28 | 0,613344994 | 0,12  | 0,852856006 | -0,05 | 0,934698507 | -0,43 | 0,376421964 |
| Csnk1g1    | -0,16 | 0,809438501 | -0,31 | 0,638366221 | -0,06 | 0,946267064 | 1,26  | 0,19354502  | 0,09  | 0,953297732 |
| Csnk1g2    | -0,5  | 0,403771843 | -0,51 | 0,210141501 | 0,6   | 0,252464368 | 0,31  | 0,298877642 | -0,45 | 0,305995061 |
| Csnk1g3    | 0,11  | 0,894248924 | -0,26 | 0,646693191 | 0,15  | 0,870542909 | 1,12  | 0,059484256 | 0,32  | 0,677838252 |
| Csnk2a1    | -0,37 | 0,292909773 | -0,17 | 0,764672565 | -0,14 | 0,875760186 | 0,03  | 0,952797297 | -0,01 | 0,991291007 |
| Csnk2a2    | 0,14  | 0,793209485 | -0,09 | 0,877128773 | 0,43  | 0,387442723 | 0,54  | 0,169830178 | 0,09  | 0,916173996 |
| Csnk2b     | -0,02 | 0,982526085 | -0,03 | 0,95830747  | -0,04 | 0,967304745 | 0,49  | 0,166705221 | -0,12 | 0,849867444 |
| Csnka2ip   | 0,47  | 0,520609641 | -0,18 | 0,800986193 | -0,2  | 0,71705844  | 0,21  | 0,837974367 | -0,12 | 0,89529118  |

|         |       |             |       |             |       |             |       |             |       |             |
|---------|-------|-------------|-------|-------------|-------|-------------|-------|-------------|-------|-------------|
| Cspg4   | -0,22 | 0,664803559 | -0,03 | 0,985151214 | 0,14  | 0,86459621  | -0,54 | 0,182485182 | -0,34 | 0,578436824 |
| Cspg5   | 0,2   | 0,856984761 | 0,59  | 0,664502462 | 0,21  | 0,705702078 | -0,95 | 0,139769231 | 0,23  | 0,845433784 |
| Cspp1   | -0,3  | 0,669214167 | 0     | 1           | 0,67  | 0,36356264  | 0,07  | 0,915360964 | 0,28  | 0,628499989 |
| Csprs   | 0,19  | 0,648730873 | 0,23  | 0,765705056 | -0,3  | 0,649118316 | -0,81 | 0,140882367 | 0,58  | 0,4940585   |
| Csrnp1  | 0,78  | 0,134562678 | 0,71  | 0,200674509 | -0,61 | 0,235638652 | -0,29 | 0,482171449 | 0,14  | 0,829280005 |
| Csrnp2  | 0,13  | 0,839375532 | 0,24  | 0,825192868 | -0,06 | 0,953074345 | -0,99 | 0,267639393 | -0,22 | 0,865258929 |
| Csrnp3  | 0,02  | 0,991919022 | 0,15  | 0,893340254 | -0,08 | 0,948637233 | -0,23 | 0,625226301 | 0,07  | 0,937558003 |
| Csrp1   | -0,12 | 0,785268526 | 0,27  | 0,541518605 | 0,01  | 0,993379272 | 0,92  | 0,036167532 | 0,83  | 0,089607313 |
| Csrp2   | 0,64  | 0,146504462 | 0,23  | 0,665727371 | 0,21  | 0,777918093 | 1,5   | 0,050259357 | 0,21  | 0,776286347 |
| Csrp2bp | -0,11 | 0,867692799 | -0,04 | 0,975103597 | 0,29  | 0,661747229 | -0,05 | 0,932315462 | -0,28 | 0,702402249 |
| Csrp3   | -0,18 | 0,824010969 | 0,1   | 0,832841509 | -0,37 | 0,425782502 | -0,07 | 0,916072825 | -0,15 | 0,910185187 |
| Cst10   | -0,17 | 0,735697265 | -0,05 | 0,956504634 | -0,3  | 0,640924712 | -0,09 | 0,921731995 | -0,01 | 0,992980215 |
| Cst11   | 0,27  | 0,738676622 | 0,49  | 0,619709049 | -0,33 | 0,598179126 | -0,07 | 0,893846627 | -0,05 | 0,953971867 |
| Cst12   | 0,02  | 0,986795639 | 0,22  | 0,817110093 | 0,05  | 0,957152002 | 0,12  | 0,852665444 | -0,15 | 0,843383597 |
| Cst13   | 0,29  | 0,447068257 | -0,16 | 0,686540452 | -0,58 | 0,324705558 | 0,23  | 0,733028982 | 0,39  | 0,661829904 |
| Cst3    | 0,34  | 0,389909576 | -0,06 | 0,898981556 | 0,03  | 0,971479752 | -0,86 | 0,032346574 | -0,26 | 0,592505698 |
| Cst6    | 0,02  | 0,992715178 | 0,01  | 0,996113371 | -0,33 | 0,692145032 | 0,08  | 0,818849811 | -0,39 | 0,723883531 |
| Cst7    | -0,31 | 0,36240006  | 0,09  | 0,845663274 | -0,33 | 0,686475917 | 0,1   | 0,912525855 | -0,01 | 0,992607235 |
| Cst8    | 0,24  | 0,694699901 | 0,01  | 0,995205602 | -0,58 | 0,443039118 | -0,05 | 0,967866794 | 0,21  | 0,859663155 |
| Cst9    | 0,43  | 0,593540946 | -0,05 | 0,958449675 | -0,85 | 0,189460036 | -0,28 | 0,711746438 | 0,09  | 0,925858284 |
| Csta1   | 0,39  | 0,4543817   | -0,33 | 0,677026666 | 0,06  | 0,953456022 | 0,15  | 0,859914509 | -0,12 | 0,891925115 |
| Cstad   | -0,16 | 0,783200207 | 0,42  | 0,664787536 | 0,24  | 0,791572073 | -0,02 | 0,987138922 | 0,06  | 0,94919447  |
| Cstb    | 0,7   | 0,247254947 | 0,09  | 0,829391238 | 0,79  | 0,286051973 | 0,41  | 0,296165331 | 0,28  | 0,665051452 |
| Cstf1   | -0,18 | 0,761457464 | 0,05  | 0,940046211 | 0,26  | 0,81893984  | 0,63  | 0,166748255 | -0,05 | 0,96963338  |
| Cstf2   | -0,75 | 0,229301605 | -0,51 | 0,625264161 | -0,46 | 0,342225898 | 0,98  | 0,059856882 | 0,28  | 0,697226565 |
| Cstf2t  | 0,14  | 0,761630454 | -0,06 | 0,915282997 | -0,07 | 0,940213182 | 0     | 1           | -0,15 | 0,874491434 |
| Cstf3   | 0     | 0,998017023 | 0,05  | 0,956998711 | 0,64  | 0,302861841 | 0,45  | 0,383637494 | 0,05  | 0,969617491 |
| Cstl1   | 0,58  | 0,469517139 | -0,22 | 0,946843873 | -0,05 | 0,964145359 | 0,62  | 0,559599448 | 0,21  | 0,910212022 |
| Ctag2   | 0,55  | 0,485159825 | 0,12  | 0,840864779 | -0,38 | 0,669266652 | 0,49  | 0,462394854 | 0,69  | 0,319952112 |
| Ctage5  | -0,57 | 0,24782842  | -0,16 | 0,703923817 | 0,54  | 0,591404136 | 0,18  | 0,692483691 | 0,08  | 0,927296036 |
| Ctbp1   | -0,14 | 0,793637667 | -0,19 | 0,664502462 | 0,05  | 0,963199274 | 0,19  | 0,618453093 | 0,08  | 0,930863234 |
| Ctbp2   | 0     | 0,999536558 | 0,26  | 0,785244931 | 0,45  | 0,56948206  | -1,14 | 0,16909689  | 0,06  | 0,966157079 |
| Ctbs    | 0,1   | 0,884171483 | -0,26 | 0,487771533 | 0,59  | 0,642712802 | -0,23 | 0,524739765 | -0,28 | 0,740069683 |
| Ctc1    | -0,15 | 0,905025251 | -0,62 | 0,426168855 | 0,34  | 0,702928613 | 0,11  | 0,868828239 | -1,01 | 0,061085652 |
| Ctcf    | -0,53 | 0,376820355 | -0,37 | 0,55011938  | 0,12  | 0,90345282  | -0,22 | 0,814810741 | 0,07  | 0,954892212 |

|          |       |             |       |             |       |             |       |             |       |             |
|----------|-------|-------------|-------|-------------|-------|-------------|-------|-------------|-------|-------------|
| Ctcf1    | 0,07  | 0,89763852  | 0,1   | 0,829391238 | 0,26  | 0,514700536 | 0,11  | 0,824364287 | 0,13  | 0,903241997 |
| Ctcf1os  | 0,12  | 0,877200555 | -0,34 | 0,677026666 | -0,32 | 0,572810613 | -0,06 | 0,902706786 | -0,3  | 0,573106355 |
| Ctdnep1  | -0,01 | 0,985602819 | 0,26  | 0,783325809 | -0,14 | 0,899941244 | 0,55  | 0,281289215 | 0,05  | 0,953297732 |
| Ctdp1    | 0,03  | 0,964154899 | -0,01 | 0,992175086 | -0,03 | 0,981110887 | 0,17  | 0,85301747  | -0,34 | 0,694233384 |
| Ctdsp1   | -0,41 | 0,507111846 | -0,36 | 0,490916298 | 0,24  | 0,60848236  | -0,25 | 0,543989546 | 0,07  | 0,92741476  |
| Ctdsp2   | -0,07 | 0,907419323 | 0,04  | 0,928134372 | -0,01 | 0,990836784 | -0,11 | 0,815868457 | -0,06 | 0,950267521 |
| Ctdspl   | -0,44 | 0,593413618 | -0,4  | 0,457889449 | 0,19  | 0,836625711 | -3,4  | 0,003863434 | -1,49 | 0,015349051 |
| Ctdspl2  | -0,03 | 0,971922167 | -0,16 | 0,843162191 | 0,08  | 0,946541303 | -0,53 | 0,270661824 | -0,23 | 0,735152891 |
| Ctf1     | 0,19  | 0,767083571 | 0     | 1           | 0,02  | 0,987003605 | -0,03 | 0,961123444 | -0,01 | 0,994865893 |
| Ctf2     | -0,24 | 0,813604928 | 0,29  | 0,633883634 | 0,18  | 0,794542194 | -0,2  | 0,599774385 | 0,1   | 0,949544475 |
| Ctgf     | 0,29  | 0,71028187  | 0,55  | 0,362188015 | -0,02 | 0,99129124  | 0,02  | 0,979829655 | 0,14  | 0,841160223 |
| Cth      | -0,02 | 0,983516046 | 0,05  | 0,943915456 | -0,08 | 0,935877713 | -0,56 | 0,36825505  | -0,13 | 0,910665092 |
| Cthrc1   | -0,55 | 0,369418071 | -0,37 | 0,565640559 | -0,37 | 0,566375328 | -0,74 | 0,220883241 | -0,84 | 0,268285808 |
| Ctif     | -0,42 | 0,298236836 | 0     | 1           | 0,63  | 0,49280728  | 0,31  | 0,546274162 | 0,22  | 0,788295661 |
| Ctla2a   | 0,07  | 0,892124736 | -0,07 | 0,882589938 | -0,13 | 0,85833551  | 0,51  | 0,144391192 | 0,07  | 0,925400252 |
| Ctla2b   | 0,13  | 0,795659022 | -0,26 | 0,51825831  | -0,36 | 0,469053827 | 0,98  | 0,033601178 | 0,1   | 0,887943873 |
| Ctla4    | 5,47  | 0,002092986 | 0,69  | 0,618203657 | -0,31 | 0,642345332 | -0,17 | 0,904690757 | 0,09  | 0,966951657 |
| Ctnna1   | -0,09 | 0,886741208 | 0,09  | 0,896003756 | -0,04 | 0,961464515 | 0,79  | 0,129101197 | 0,17  | 0,859025777 |
| Ctnna2   | 0,31  | 0,673291416 | -0,21 | 0,767178812 | 0,2   | 0,772397144 | 0,51  | 0,219489403 | -0,08 | 0,925858284 |
| Ctnna3   | -0,36 | 0,617280733 | 0,05  | 0,965147491 | -0,09 | 0,899913569 | -1,05 | 0,068144917 | -0,64 | 0,532421192 |
| Ctnnal1  | -1,5  | 0,074890017 | -0,47 | 0,318079221 | 0,97  | 0,209201872 | 0,17  | 0,817536845 | -0,59 | 0,744850786 |
| Ctnnb1   | -0,54 | 0,226936501 | -0,23 | 0,541469535 | 0,31  | 0,532429434 | 0,49  | 0,178527394 | -0,1  | 0,911850421 |
| Ctnnbip1 | -0,03 | 0,972896061 | -0,61 | 0,421936856 | 0,22  | 0,777417583 | 1,5   | 0,017059793 | -0,6  | 0,421255613 |
| Ctnnbl1  | -0,64 | 0,194613044 | -0,22 | 0,627228272 | 0,68  | 0,337509636 | 0,29  | 0,60387757  | -0,22 | 0,782889048 |
| Ctnnd1   | -0,25 | 0,739727324 | -0,03 | 0,960128117 | 0,58  | 0,48646529  | 0,12  | 0,85301747  | -0,54 | 0,389664866 |
| Ctnnd2   | 0,17  | 0,769138738 | 0,31  | 0,666450149 | -0,22 | 0,661747229 | -0,11 | 0,892186579 | -0,47 | 0,454357813 |
| Ctns     | -0,19 | 0,713035711 | 0,2   | 0,918694468 | 0,87  | 0,287792787 | -1,12 | 0,302824836 | -0,41 | 0,670382259 |
| Ctps     | -0,39 | 0,664456582 | 0,37  | 0,551650198 | -0,07 | 0,945482    | 1,74  | 0,02037398  | 0,64  | 0,565817768 |
| Ctps2    | -0,3  | 0,792735264 | 0,15  | 0,856287448 | -0,51 | 0,611653838 | -0,22 | 0,688188576 | -0,11 | 0,922577223 |
| Ctr9     | -0,25 | 0,61379872  | -0,07 | 0,954948291 | 0,53  | 0,305655785 | 0,55  | 0,522511755 | -0,15 | 0,911780802 |
| Ctrb1    | 0,02  | 0,973545171 | 0,03  | 0,965147491 | 0,03  | 0,984119559 | 0,04  | 0,952768654 | -0,18 | 0,817201767 |
| Ctrc     | 0,27  | 0,627571008 | -0,22 | 0,839636434 | 0,27  | 0,712697139 | 0,19  | 0,785027978 | 0,02  | 0,984125319 |
| Ctrcos   | 0,3   | 0,535827944 | 0,11  | 0,872562549 | -0,39 | 0,516062803 | 0,29  | 0,598657551 | 0,1   | 0,906031862 |
| Ctrl     | 0,75  | 0,173739614 | 0,86  | 0,379721127 | -0,69 | 0,290256469 | 0,35  | 0,286855307 | 1,14  | 0,04542389  |
| Cts3     | -0,19 | 0,825308689 | -0,19 | 0,882931058 | -0,14 | 0,909728993 | -0,24 | 0,717305989 | -0,53 | 0,40189401  |

|           |       |             |       |             |       |             |       |             |       |             |
|-----------|-------|-------------|-------|-------------|-------|-------------|-------|-------------|-------|-------------|
| Cts6      | -0,13 | 0,882500171 | 0,48  | 0,599495018 | -0,05 | 0,963199274 | -0,43 | 0,391807778 | 0,03  | 0,978604922 |
| Cts7      | 0,55  | 0,337563637 | -0,2  | 0,910184435 | 0,13  | 0,88485244  | 0,09  | 0,832080727 | -0,3  | 0,669861917 |
| Cts8      | -0,02 | 0,986639953 | 0,53  | 0,671319666 | -0,11 | 0,909963525 | 0,17  | 0,809652356 | 0,67  | 0,298614079 |
| Cts8-ps   | 0,14  | 0,861354123 | 0,17  | 0,794404033 | -0,07 | 0,946201063 | 0,26  | 0,740792457 | -0,27 | 0,860591136 |
| Ctsa      | 0,14  | 0,803291325 | -0,04 | 0,962980292 | -0,07 | 0,922318683 | 0,25  | 0,431688255 | -0,25 | 0,721546325 |
| Ctsb      | -0,13 | 0,743650884 | -0,05 | 0,927073711 | 0,32  | 0,436827113 | 0,82  | 0,053763228 | -0,52 | 0,27453763  |
| Ctsc      | -0,01 | 0,996552452 | 0,29  | 0,774377142 | 1,44  | 0,062420645 | 0,09  | 0,958889858 | -0,33 | 0,811191768 |
| Ctsd      | 0,06  | 0,959443704 | 0,13  | 0,892727342 | 0,12  | 0,922318683 | -0,66 | 0,144044949 | -0,05 | 0,960974478 |
| Ctse      | 0,16  | 0,840909921 | 0,06  | 0,946885634 | 0,38  | 0,542398079 | -0,03 | 0,940891309 | 0,03  | 0,974553568 |
| Ctsf      | -0,12 | 0,918758168 | 0,19  | 0,802979985 | 0,31  | 0,725314316 | -2,49 | 0,005240816 | -0,88 | 0,117901431 |
| Ctsg      | -0,23 | 0,68161851  | 0,23  | 0,762657778 | 0,18  | 0,821177365 | 0,33  | 0,339455217 | 0,16  | 0,844105751 |
| Ctsh      | -0,21 | 0,840909921 | -0,45 | 0,582478031 | 0,53  | 0,552093103 | -2,79 | 0,003440207 | -0,96 | 0,066502011 |
| Ctsj      | 0,26  | 0,777833654 | -0,41 | 0,651581125 | -0,43 | 0,660610212 | 0,07  | 0,940708339 | 0,39  | 0,86244757  |
| Ctsk      | 0,14  | 0,857585372 | 0,53  | 0,812605205 | 0,8   | 0,350941357 | -0,13 | 0,869148815 | 0,03  | 0,982718    |
| Ctsl      | -0,12 | 0,820785667 | 0,34  | 0,539700767 | 0,36  | 0,542470051 | 0,42  | 0,394817626 | -0,24 | 0,731865047 |
| Ctll3     | -0,09 | 0,922118639 | 0,04  | 0,970020205 | -0,16 | 0,884553705 | 0,22  | 0,75629951  | -0,32 | 0,790424343 |
| Ctism     | 0,35  | 0,607696343 | -0,4  | 0,703041962 | 0,26  | 0,653810439 | 0,16  | 0,831385555 | -0,35 | 0,725475933 |
| Ctso      | -0,11 | 0,928103232 | -0,14 | 0,882589938 | 0,28  | 0,591420507 | -1,14 | 0,041009258 | -0,56 | 0,637958817 |
| Ctsq      | 0,68  | 0,310965981 | -0,19 | 0,815317911 | -0,24 | 0,734556263 | 0,11  | 0,857522633 | 0     | 0,999775166 |
| Ctsr      | 0,72  | 0,190677329 | 0,71  | 0,163435114 | -0,36 | 0,76031147  | -0,75 | 0,253294027 | -0,36 | 0,673120647 |
| Ctss      | 1,36  | 0,286058681 | 0,96  | 0,403364852 | -0,38 | 0,798320169 | 0,59  | 0,579663223 | 1,49  | 0,027387595 |
| Ctsw      | -0,32 | 0,735860437 | 0,84  | 0,425798637 | 0,84  | 0,584320897 | -0,7  | 0,182249359 | 0,28  | 0,702558142 |
| Ctsz      | 0,03  | 0,966775766 | -0,27 | 0,599783551 | 0,88  | 0,046696595 | -0,05 | 0,924427393 | -0,7  | 0,267361963 |
| Cttn      | -0,11 | 0,865776054 | -0,03 | 0,966078321 | 0,39  | 0,474190776 | 0,47  | 0,347557572 | -0,45 | 0,484862172 |
| Cttntp2   | 1,87  | 0,077161113 | 2,31  | 0,0535509   | -2,6  | 0,003325389 | 0,81  | 0,348518558 | 1,7   | 0,047123864 |
| Cttntp2nl | 0,56  | 0,211368511 | 0,43  | 0,506768978 | -0,63 | 0,260587376 | 0,37  | 0,40199632  | 0,28  | 0,643382128 |
| Ctu1      | 0,22  | 0,764189777 | 0,09  | 0,932292974 | 0,14  | 0,914725972 | -0,31 | 0,512935647 | -0,16 | 0,860591136 |
| Ctu2      | -0,32 | 0,474293292 | -0,11 | 0,828818891 | 0,3   | 0,49623905  | 0,44  | 0,266659455 | 0,01  | 0,990091016 |
| Ctxn1     | -0,52 | 0,247582979 | -0,45 | 0,565603216 | 1,73  | 0,063243606 | 1,31  | 0,232954672 | -0,25 | 0,889884382 |
| Ctxn2     | 0,3   | 0,54723302  | 0,03  | 0,975836193 | 0,02  | 0,984407511 | -0,09 | 0,811006924 | -0,2  | 0,827532593 |
| Ctxn3     | 0,18  | 0,692637141 | 0,07  | 0,900801202 | -0,15 | 0,831214914 | -0,18 | 0,808019987 | -0,37 | 0,616797608 |
| Cubn      | -1,34 | 0,020486771 | -0,69 | 0,490814009 | 0,23  | 0,794830621 | -0,42 | 0,45945795  | 0,07  | 0,954350222 |
| Cuedc1    | -0,89 | 0,083335073 | -0,39 | 0,467853942 | -0,33 | 0,770526999 | -1,07 | 0,035685356 | -0,37 | 0,609111981 |
| Cuedc2    | -0,11 | 0,787157782 | -0,04 | 0,947107147 | 0,23  | 0,659694447 | 0,1   | 0,900618083 | -0,19 | 0,844265172 |
| Cul1      | -0,19 | 0,699151242 | -0,22 | 0,76665257  | 0,22  | 0,716743339 | 0,09  | 0,850699918 | 0,41  | 0,424354738 |

|         |       |             |       |             |       |             |       |             |       |             |
|---------|-------|-------------|-------|-------------|-------|-------------|-------|-------------|-------|-------------|
| Cul2    | 0,2   | 0,701297763 | 0,06  | 0,928780248 | 0,3   | 0,838359141 | 0,9   | 0,428295778 | 1,24  | 0,236342423 |
| Cul3    | -0,15 | 0,764189777 | 0,21  | 0,649611595 | 0,32  | 0,548839869 | 0,37  | 0,530903386 | 0,36  | 0,605912145 |
| Cul4a   | -0,47 | 0,446805179 | -0,31 | 0,579543516 | 0,18  | 0,82104737  | 0,52  | 0,243226517 | 0,23  | 0,724669859 |
| Cul4b   | 0,2   | 0,826574109 | -0,09 | 0,937377463 | 1,09  | 0,190808146 | 0,68  | 0,172485486 | -0,6  | 0,518593772 |
| Cul5    | -0,46 | 0,678857468 | -0,04 | 0,988550087 | 0,35  | 0,684455958 | -0,26 | 0,810591071 | -0,44 | 0,684349871 |
| Cul7    | -0,75 | 0,241021853 | -0,31 | 0,518494408 | 0,01  | 0,992510518 | 1,1   | 0,026400331 | -0,09 | 0,917710291 |
| Cul9    | 0,48  | 0,535827944 | 0,61  | 0,445693656 | -0,1  | 0,901920544 | -0,75 | 0,096085093 | -0,26 | 0,625087577 |
| Cuta    | 0,11  | 0,838208309 | -0,23 | 0,614530823 | -0,08 | 0,932838243 | -0,11 | 0,854824898 | -0,02 | 0,984632256 |
| Cutal   | 0,08  | 0,89763852  | 0,19  | 0,758387553 | -0,16 | 0,807786405 | 0,43  | 0,348565724 | 0,15  | 0,855741842 |
| Cutc    | 0,23  | 0,698695861 | 0,28  | 0,711237219 | -0,17 | 0,790112485 | 0,16  | 0,799696249 | 0,11  | 0,918170806 |
| Cux1    | -0,34 | 0,374431896 | -0,46 | 0,373555617 | -0,06 | 0,946201063 | -0,09 | 0,847253572 | -0,45 | 0,352006036 |
| Cux2    | -0,4  | 0,591725454 | 0,01  | 0,997935558 | -0,18 | 0,859460126 | -0,06 | 0,95852873  | 0,01  | 0,991628025 |
| Cuzd1   | 0,26  | 0,663915113 | 0,23  | 0,7010322   | -0,36 | 0,613380041 | 0,01  | 0,995031034 | 0,33  | 0,733979012 |
| Cwc15   | 0,03  | 0,956152533 | -0,19 | 0,738762579 | 0,23  | 0,677766266 | 0,27  | 0,468239117 | 0,01  | 0,985982505 |
| Cwc22   | -0,02 | 0,97362463  | 0,16  | 0,756952478 | 0,11  | 0,872180056 | -0,01 | 0,996287679 | -0,01 | 0,9939542   |
| Cwc25   | 0,08  | 0,906885053 | -0,06 | 0,942593581 | 0,49  | 0,302861841 | 0,07  | 0,947477693 | 0,17  | 0,867083528 |
| Cwc27   | -0,34 | 0,421957622 | 0,22  | 0,732044571 | -0,51 | 0,406287171 | -0,33 | 0,590307186 | 0,08  | 0,939258449 |
| Cwf19I1 | -0,43 | 0,407600798 | -0,01 | 0,994137877 | 0,24  | 0,651825599 | -0,24 | 0,781621482 | -0,16 | 0,871015717 |
| Cwf19I2 | 0,61  | 0,262163101 | 0,15  | 0,902847035 | 0,01  | 0,996322566 | 0,39  | 0,490472574 | 0,74  | 0,241261852 |
| Cwh43   | 0,09  | 0,868121038 | -0,08 | 0,890136254 | -0,24 | 0,721952929 | 0,16  | 0,741452902 | 0,01  | 0,993293923 |
| Cx3cl1  | 1,59  | 0,06958443  | 1,64  | 0,051918634 | -0,85 | 0,062420645 | -1,64 | 0,038099863 | 1,15  | 0,108900542 |
| Cx3cr1  | -0,02 | 0,969486005 | -0,07 | 0,940111449 | 0,2   | 0,823823322 | 0,18  | 0,801315811 | 0     | 0,999572304 |
| Cxadr   | 0,25  | 0,809289933 | 0,29  | 0,610793533 | 1,77  | 0,008511047 | -0,45 | 0,470236257 | -0,32 | 0,78960943  |
| Cxcl1   | -0,33 | 0,468284568 | -0,44 | 0,429168189 | 0,35  | 0,758675564 | 1,3   | 0,064177589 | 0,25  | 0,684045812 |
| Cxcl10  | 3,21  | 0,013567256 | 2,07  | 0,035816592 | -2,4  | 0,000366151 | -0,28 | 0,376757421 | 1,95  | 0,003129313 |
| Cxcl11  | 3,17  | 0,016301923 | 3,63  | 0,040620931 | -3,46 | 0,001411704 | -0,15 | 0,884326814 | 4,49  | 0,003940056 |
| Cxcl12  | -0,2  | 0,887059322 | 0     | 0,999395995 | -0,12 | 0,934235869 | 0,51  | 0,206540971 | 0,13  | 0,874554354 |
| Cxcl13  | -0,22 | 0,602160482 | -0,32 | 0,672871026 | 0,01  | 0,996322566 | 0,1   | 0,928002892 | -0,51 | 0,354557431 |
| Cxcl14  | 0,25  | 0,662854107 | 0,27  | 0,618087796 | 0,33  | 0,904132011 | -0,22 | 0,695502157 | -0,29 | 0,738853855 |
| Cxcl15  | 0,44  | 0,490731724 | -0,34 | 0,507925771 | 0,17  | 0,839319788 | 0,12  | 0,813541536 | 0,39  | 0,604599251 |
| Cxcl16  | 0,7   | 0,421029929 | 0,84  | 0,22001825  | -0,3  | 0,660610212 | -0,01 | 0,994661585 | 0,46  | 0,550083777 |
| Cxcl17  | 0,61  | 0,194613044 | 0,3   | 0,456323011 | -0,6  | 0,421026326 | -0,52 | 0,269345673 | 0,06  | 0,969117862 |
| Cxcl3   | -0,53 | 0,621037557 | -0,26 | 0,765325717 | 1,98  | 0,399470425 | -0,36 | 0,431657795 | -0,08 | 0,962820357 |
| Cxcl5   | -0,2  | 0,786069531 | -0,1  | 0,942166578 | 0,44  | 0,531023255 | -0,39 | 0,683901621 | -0,84 | 0,442729468 |
| Cxcl9   | 0,92  | 0,214139353 | 0,79  | 0,153524445 | -2,75 | 6,91718E-05 | 3,6   | 0,008674249 | 3,74  | 0,001408836 |

|          |       |             |       |             |       |             |       |             |       |             |
|----------|-------|-------------|-------|-------------|-------|-------------|-------|-------------|-------|-------------|
| Cxcr1    | 0,01  | 0,986216037 | 0,07  | 0,89034555  | -0,6  | 0,27041915  | 0,18  | 0,635378562 | 0,45  | 0,433940975 |
| Cxcr2    | -0,14 | 0,854197474 | -0,13 | 0,912535732 | -0,28 | 0,888371896 | 0,19  | 0,801930792 | -0,04 | 0,973609004 |
| Cxcr3    | -0,4  | 0,535737059 | -0,21 | 0,735689605 | -0,47 | 0,326622843 | 0,69  | 0,126774995 | 0,1   | 0,917844354 |
| Cxcr4    | -0,13 | 0,798333389 | -0,28 | 0,657849224 | 0,31  | 0,737241227 | 2,41  | 0,009399265 | -1,16 | 0,039850854 |
| Cxcr5    | 0,13  | 0,772859736 | 0,06  | 0,905051067 | -0,16 | 0,77955403  | -0,15 | 0,656038987 | 0,02  | 0,987603478 |
| Cxcr6    | 0,04  | 0,959940727 | 0,22  | 0,716769193 | -1,5  | 0,318952901 | -0,92 | 0,051726972 | 1,07  | 0,122922652 |
| Cxx1a    | -0,03 | 0,947630317 | -0,36 | 0,564634931 | 0,07  | 0,911634383 | 0,29  | 0,588576174 | -0,25 | 0,641371301 |
| Cxx1b    | -0,27 | 0,557855331 | -0,35 | 0,542153202 | 0,21  | 0,740824238 | 0,64  | 0,128119399 | 0,45  | 0,431894609 |
| Cxx1c    | -0,97 | 0,083335073 | -0,4  | 0,641052915 | 0,3   | 0,684455958 | 0,18  | 0,838236207 | -0,17 | 0,877207052 |
| Cxxc1    | -0,57 | 0,355202115 | -0,41 | 0,297762088 | 0,21  | 0,757498725 | 0,19  | 0,837974367 | -0,12 | 0,924867043 |
| Cxxc4    | 0,05  | 0,949931783 | 0,16  | 0,678357594 | 0,19  | 0,791940256 | -0,76 | 0,329957507 | -0,17 | 0,861056054 |
| Cxxc5    | -0,33 | 0,60348583  | -0,13 | 0,898952381 | 0,73  | 0,180608933 | 1,32  | 0,433348093 | 0,46  | 0,792889876 |
| Cyb561   | -1,1  | 0,22717479  | -0,41 | 0,806959399 | 0,01  | 0,997268369 | 0,82  | 0,564717186 | -0,42 | 0,728483022 |
| Cyb561a3 | 0,38  | 0,59710379  | -0,03 | 0,959685428 | -0,48 | 0,580911166 | -0,15 | 0,721611115 | -0,35 | 0,559794251 |
| Cyb561d1 | 0,32  | 0,701624105 | -0,26 | 0,556442436 | -0,06 | 0,928085218 | 0,02  | 0,979212436 | 0,08  | 0,949544475 |
| Cyb561d2 | -0,18 | 0,761457464 | 0,09  | 0,930192503 | 0,53  | 0,464092846 | -0,47 | 0,441112475 | -0,53 | 0,427936864 |
| Cyb5a    | 0     | 1           | 0,23  | 0,62432723  | -0,07 | 0,920828015 | 0,11  | 0,740451724 | -0,01 | 0,991418175 |
| Cyb5b    | -0,57 | 0,198434305 | 0,09  | 0,932292974 | 0,25  | 0,830541787 | -0,7  | 0,502230334 | -0,33 | 0,774255591 |
| Cyb5d2   | 0,04  | 0,978126898 | -0,2  | 0,840275737 | -0,08 | 0,950846671 | 0,57  | 0,695337192 | 0,19  | 0,929780699 |
| Cyb5r1   | -0,11 | 0,873799393 | -0,82 | 0,152199284 | 0,56  | 0,444017304 | 0,32  | 0,58874149  | -0,27 | 0,726339638 |
| Cyb5r2   | 0,05  | 0,930509569 | 0,01  | 0,991131565 | -0,04 | 0,955217689 | -0,02 | 0,978056041 | -0,15 | 0,839824817 |
| Cyb5r3   | -0,28 | 0,597519827 | -0,15 | 0,80192513  | 0,25  | 0,555158385 | 0,08  | 0,877635359 | -0,73 | 0,137394562 |
| Cyb5r4   | -0,21 | 0,80260514  | -0,24 | 0,750555245 | -0,12 | 0,926633738 | 0,33  | 0,538229097 | -0,35 | 0,623555129 |
| Cyb5rl   | 0,01  | 0,996043336 | -0,41 | 0,565639972 | 0,08  | 0,922318683 | -0,25 | 0,690442683 | -0,73 | 0,291469914 |
| Cyba     | 0,06  | 0,906252401 | 0,21  | 0,661566887 | 0,2   | 0,767822182 | 0,26  | 0,498979274 | -0,02 | 0,979456872 |
| Cybb     | 0,2   | 0,856118781 | -0,58 | 0,677208272 | 0,25  | 0,823396412 | 0,76  | 0,109546855 | 0,1   | 0,912250982 |
| Cybrd1   | 0,47  | 0,312439966 | -0,39 | 0,379294339 | 0,08  | 0,938323709 | -0,32 | 0,618254643 | -0,36 | 0,726687847 |
| Cyc1     | -0,15 | 0,755023721 | -0,42 | 0,388337768 | 0,51  | 0,514700536 | 0,43  | 0,311719969 | 0,18  | 0,80484971  |
| Cycs     | -0,03 | 0,954517543 | -0,22 | 0,609977513 | 0,12  | 0,914134206 | 0,32  | 0,415022773 | 0,57  | 0,244965154 |
| Cyct     | -0,05 | 0,956452501 | -0,06 | 0,935329426 | 0,06  | 0,938771378 | 0,27  | 0,455353649 | 0,03  | 0,968130547 |
| Cyfp1    | -0,31 | 0,532965036 | -0,18 | 0,777124795 | 0,36  | 0,652745075 | 0,4   | 0,56693064  | 0,07  | 0,952141995 |
| Cyfp2    | -0,41 | 0,464939452 | 0,36  | 0,490814009 | -0,52 | 0,577789393 | -1,29 | 0,093966892 | 0,19  | 0,881968395 |
| Cygb     | -0,6  | 0,717407143 | 0,69  | 0,507925771 | 0,32  | 0,659973133 | -0,66 | 0,220050801 | -1,11 | 0,027132913 |
| Cyhr1    | -0,22 | 0,637102753 | 0,37  | 0,626130765 | 0,6   | 0,545465016 | -0,6  | 0,259973988 | -0,73 | 0,188623626 |
| Cylc1    | -0,14 | 0,732747802 | 0,07  | 0,900801202 | 0,31  | 0,561271294 | -0,05 | 0,909968264 | -0,01 | 0,991291007 |

|            |       |             |       |             |       |             |       |             |       |             |
|------------|-------|-------------|-------|-------------|-------|-------------|-------|-------------|-------|-------------|
| Cylc2      | -0,39 | 0,419180544 | 0,21  | 0,883145635 | -0,35 | 0,628048897 | -0,37 | 0,546558562 | 0,01  | 0,991437885 |
| Cyld       | 0,24  | 0,68161851  | 0,7   | 0,250902933 | -0,11 | 0,940489823 | 0,13  | 0,769870404 | 0,74  | 0,290610657 |
| Cym        | -0,05 | 0,9231839   | 0,09  | 0,879693148 | -0,08 | 0,924808211 | -0,1  | 0,912858228 | -0,09 | 0,915238726 |
| Cyp11a1    | 0,25  | 0,62872508  | 0,18  | 0,804868131 | -0,38 | 0,636233777 | -0,16 | 0,77930256  | 0,18  | 0,832848337 |
| Cyp11b1    | 0,15  | 0,838825457 | -0,29 | 0,851329652 | -0,05 | 0,960275507 | 0,29  | 0,575912901 | 0,42  | 0,635612479 |
| Cyp11b2    | 0,38  | 0,687662951 | 0,73  | 0,456156525 | -0,37 | 0,760930184 | 0,03  | 0,984966598 | -0,08 | 0,952753183 |
| Cyp17a1    | -0,09 | 0,911399028 | -0,26 | 0,753679288 | 0,27  | 0,693655482 | -0,14 | 0,867953377 | -0,7  | 0,177261751 |
| Cyp19a1    | 0     | 0,996219097 | 0,02  | 0,981586987 | 0,08  | 0,919818907 | 0,1   | 0,871925977 | 0,19  | 0,846455859 |
| Cyp1a1     | -0,09 | 0,893283341 | -0,04 | 0,965147491 | -0,18 | 0,783052291 | -2,25 | 0,01517378  | -1,47 | 0,029071378 |
| Cyp1a2     | 0,16  | 0,906885053 | -0,1  | 0,956934125 | -0,3  | 0,724922679 | 0,36  | 0,40199632  | 0,44  | 0,61355523  |
| Cyp1b1     | 0,08  | 0,941218573 | -0,03 | 0,983852643 | -0,62 | 0,542385406 | -2,05 | 0,01965347  | 0,8   | 0,096471856 |
| Cyp20a1    | 0     | 0,999700495 | 0,15  | 0,826127202 | 0,41  | 0,468808344 | -1,21 | 0,085392524 | -0,2  | 0,825697364 |
| Cyp21a1    | 0,07  | 0,901768047 | 0,15  | 0,876503933 | -0,17 | 0,776419989 | 0,06  | 0,952133471 | 0,02  | 0,987404034 |
| Cyp24a1    | 0,53  | 0,500870793 | 0,34  | 0,582719433 | -0,36 | 0,682309944 | -0,44 | 0,570133312 | 0,09  | 0,961281513 |
| Cyp26a1    | 0,15  | 0,780773609 | 0,12  | 0,819802664 | 1,17  | 0,076416888 | 0,06  | 0,957432042 | -0,06 | 0,96738578  |
| Cyp26b1    | -0,04 | 0,964086001 | 0,17  | 0,68330349  | 0,39  | 0,443902407 | -2,48 | 0,004331967 | -1,43 | 0,300311649 |
| Cyp26c1    | 0,2   | 0,679409957 | 0,43  | 0,442884795 | 0,05  | 0,956894731 | -0,19 | 0,603611964 | 0,09  | 0,912890826 |
| Cyp27a1    | 0,03  | 0,958535933 | 0,14  | 0,912535732 | 0,13  | 0,885680687 | -0,66 | 0,535828309 | -0,14 | 0,9162287   |
| Cyp27b1    | 0,18  | 0,845495686 | -0,2  | 0,867512619 | -0,19 | 0,826069312 | 0,36  | 0,538165751 | 0,16  | 0,840515079 |
| Cyp2a12    | 0,29  | 0,699168612 | -0,25 | 0,769659826 | -0,5  | 0,261763372 | 0,02  | 0,979477685 | -0,03 | 0,983469081 |
| Cyp2a22    | 0,49  | 0,701391957 | -0,55 | 0,531280356 | -0,31 | 0,566351122 | 0,65  | 0,507978879 | 0,33  | 0,815693459 |
| Cyp2a4     | -0,5  | 0,701624105 | 0,64  | 0,561004864 | 0,11  | 0,938323709 | -0,58 | 0,253738266 | 0,39  | 0,845218636 |
| Cyp2ab1    | 0,16  | 0,774127883 | 0,04  | 0,967383815 | 0,56  | 0,418168039 | -0,5  | 0,581523188 | -0,1  | 0,956610289 |
| Cyp2b13    | -0,03 | 0,976314749 | 0,05  | 0,925520621 | 0,11  | 0,878636183 | -0,31 | 0,46207446  | -0,06 | 0,96918257  |
| Cyp2b19    | 0,19  | 0,813201941 | 0,34  | 0,765180904 | -0,08 | 0,934206194 | 0,13  | 0,929835301 | 0,27  | 0,864373858 |
| Cyp2b23    | 0,21  | 0,80226019  | -0,35 | 0,750325684 | -0,03 | 0,983471086 | 0,47  | 0,615861279 | 0,16  | 0,896355106 |
| Cyp2b9     | -0,35 | 0,644756656 | 0,09  | 0,948409105 | 0,04  | 0,963199274 | 0,02  | 0,973294863 | 0,23  | 0,754135698 |
| Cyp2c29    | 0,37  | 0,475955974 | -0,67 | 0,600432986 | 0,18  | 0,878636183 | 0,38  | 0,513261302 | 0,13  | 0,927536545 |
| Cyp2c37    | 0,19  | 0,818611891 | -0,01 | 0,997711184 | -0,57 | 0,385794091 | -0,63 | 0,682210385 | -0,08 | 0,974427541 |
| Cyp2c38    | -0,01 | 0,998027251 | 0     | 1           | -0,15 | 0,813180174 | 0,41  | 0,567919709 | 0,2   | 0,786221459 |
| Cyp2c39    | -0,14 | 0,863048221 | -0,64 | 0,424863079 | 0     | 0,997581017 | 0,81  | 0,206698166 | 0,16  | 0,864257719 |
| Cyp2c44    | -0,23 | 0,692490424 | 0,17  | 0,669713758 | -0,27 | 0,733092626 | -0,92 | 0,045135351 | -1,02 | 0,062213168 |
| Cyp2c53-ps | 0,21  | 0,657723995 | -0,02 | 0,984710854 | 0,27  | 0,546286708 | 0,1   | 0,814029933 | -0,03 | 0,975441362 |
| Cyp2c54    | 0,05  | 0,976200957 | -0,08 | 0,965147491 | -0,38 | 0,532868478 | -0,01 | 0,999221046 | 0,32  | 0,869148467 |
| Cyp2c55    | 0,07  | 0,934802231 | 0,35  | 0,844295989 | 0,13  | 0,85952125  | 0,03  | 0,986412644 | 0,13  | 0,912279488 |

|            |       |             |       |             |       |             |       |             |       |             |
|------------|-------|-------------|-------|-------------|-------|-------------|-------|-------------|-------|-------------|
| Cyp2c65    | -0,63 | 0,217539055 | -0,17 | 0,750000576 | -0,03 | 0,974887915 | -0,17 | 0,804193987 | -0,34 | 0,675519772 |
| Cyp2c66    | -0,1  | 0,832696131 | 0,28  | 0,826165513 | -0,19 | 0,73437591  | -0,09 | 0,919668684 | 0,09  | 0,953297732 |
| Cyp2c67    | 0,32  | 0,657723995 | 0,3   | 0,495742596 | 0,25  | 0,67074385  | -0,27 | 0,502288046 | 0,51  | 0,507600858 |
| Cyp2c68    | -0,07 | 0,905511846 | -0,23 | 0,805949528 | -0,31 | 0,59744325  | 0,45  | 0,420992187 | 0,5   | 0,59413838  |
| Cyp2c69    | -0,31 | 0,68549519  | -0,38 | 0,489608385 | -0,2  | 0,809137779 | -0,33 | 0,651395269 | -0,63 | 0,378505645 |
| Cyp2c70    | 0,04  | 0,964154899 | 0,29  | 0,61590901  | 0,06  | 0,956570063 | -0,25 | 0,649456235 | -0,56 | 0,404123968 |
| Cyp2d10    | 0,44  | 0,466960111 | -0,51 | 0,400515868 | -0,13 | 0,905177737 | 0,3   | 0,546481508 | -0,28 | 0,76529609  |
| Cyp2d11    | 0,15  | 0,887389217 | 0,38  | 0,695823136 | -0,24 | 0,714376082 | -0,23 | 0,560385097 | -0,02 | 0,987603478 |
| Cyp2d12    | -0,12 | 0,894913576 | 0,34  | 0,844500324 | 0,05  | 0,963381531 | -1,75 | 0,449729778 | -1,4  | 0,553650211 |
| Cyp2d13    | 0,39  | 0,701627731 | 0,18  | 0,872330696 | -0,13 | 0,864598204 | 0,13  | 0,857910103 | 0,33  | 0,590396118 |
| Cyp2d22    | -0,34 | 0,764432229 | -0,04 | 0,970762922 | -0,22 | 0,80107055  | -1,87 | 0,01121436  | -0,71 | 0,140794982 |
| Cyp2d26    | 0,41  | 0,663447662 | 0,42  | 0,514920042 | -0,23 | 0,849697489 | -0,58 | 0,51577838  | 0,4   | 0,587915673 |
| Cyp2d34    | 0,45  | 0,617280733 | -0,4  | 0,666450149 | -0,08 | 0,943069255 | -0,06 | 0,957573971 | -0,57 | 0,426549004 |
| Cyp2d37-ps | 0,23  | 0,755498004 | -0,65 | 0,466405695 | 0,24  | 0,743604411 | 0,43  | 0,314150802 | -0,1  | 0,951125195 |
| Cyp2d40    | 0,29  | 0,828090765 | 0     | 1           | -0,11 | 0,922318683 | 0,02  | 0,981332523 | 0,14  | 0,885777129 |
| Cyp2d9     | -0,01 | 0,991919022 | 0,28  | 0,61590901  | 0,16  | 0,867580642 | -0,39 | 0,425424221 | -0,07 | 0,935812103 |
| Cyp2e1     | 0,04  | 0,971245076 | -0,23 | 0,855632384 | -0,43 | 0,50984952  | 0,21  | 0,839755684 | -0,21 | 0,816940286 |
| Cyp2f2     | -0,36 | 0,423049032 | -0,27 | 0,657429109 | -0,26 | 0,727809441 | 0,05  | 0,932177251 | 0,12  | 0,876418697 |
| Cyp2g1     | 0,32  | 0,654324758 | 0,01  | 0,995205602 | -0,01 | 0,994838841 | 0,39  | 0,535443302 | 0,11  | 0,930287169 |
| Cyp2j11    | 0,58  | 0,6226265   | 0,61  | 0,19876663  | 0,03  | 0,98722236  | -0,94 | 0,338873926 | 0,57  | 0,586987425 |
| Cyp2j12    | 0,73  | 0,312360753 | 0,11  | 0,914952205 | -0,13 | 0,920858287 | 0,04  | 0,979516321 | 0,1   | 0,947437555 |
| Cyp2j13    | 0,01  | 0,995533999 | 0,09  | 0,935329426 | -0,83 | 0,293036801 | -0,11 | 0,84557239  | -0,35 | 0,563751143 |
| Cyp2j5     | 0,06  | 0,961367996 | 0,37  | 0,692810551 | -0,1  | 0,904057901 | -1,24 | 0,284940277 | 0,29  | 0,885318142 |
| Cyp2j6     | 0,3   | 0,804578767 | -0,12 | 0,861862086 | 0     | 0,999931921 | 0,54  | 0,371970704 | -0,08 | 0,952753183 |
| Cyp2j8     | 0,14  | 0,863067773 | -0,58 | 0,490650707 | -0,05 | 0,959990799 | 0,29  | 0,776545078 | -0,53 | 0,582734169 |
| Cyp2j9     | 0,03  | 0,983563899 | 0,05  | 0,973945454 | -0,41 | 0,678840444 | -0,63 | 0,635651049 | 0,22  | 0,901132475 |
| Cyp2r1     | 0,13  | 0,922118639 | -0,44 | 0,44688209  | 0,15  | 0,910766724 | 0,83  | 0,291638584 | 0,31  | 0,781777975 |
| Cyp2s1     | -0,2  | 0,801665973 | -0,06 | 0,967833514 | 0,6   | 0,30134516  | 0,36  | 0,538165751 | 0,26  | 0,667316609 |
| Cyp2t4     | 0,54  | 0,409977631 | 0,29  | 0,582741439 | -0,24 | 0,775478253 | -0,8  | 0,203223269 | 0,01  | 0,991216325 |
| Cyp2u1     | -0,82 | 0,339051395 | 0,25  | 0,631728257 | 0,01  | 0,997268369 | -1,77 | 0,09826494  | -0,24 | 0,845218636 |
| Cyp2w1     | -0,41 | 0,470166881 | -0,44 | 0,693906911 | 0,2   | 0,772008734 | 0,21  | 0,720870706 | -0,09 | 0,957644416 |
| Cyp39a1    | -1,41 | 0,089282283 | -0,87 | 0,48206644  | 1,24  | 0,227608482 | -0,66 | 0,543475623 | -1,72 | 0,039784019 |
| Cyp3a11    | -0,21 | 0,892358883 | -0,08 | 0,959209847 | 0,28  | 0,830336321 | -0,77 | 0,276715285 | -0,21 | 0,821727352 |
| Cyp3a13    | 0,21  | 0,717407143 | 0     | 1           | -0,22 | 0,725191296 | -0,15 | 0,826101288 | 0,56  | 0,35507605  |
| Cyp3a16    | 0,32  | 0,534017117 | -0,55 | 0,637595325 | -0,15 | 0,867152476 | 0,36  | 0,311276982 | -0,09 | 0,916297433 |



|            |       |             |       |             |       |             |       |             |       |             |
|------------|-------|-------------|-------|-------------|-------|-------------|-------|-------------|-------|-------------|
| Cyp3a41b   | 0,01  | 0,996219097 | -0,45 | 0,486203165 | 0,31  | 0,62453143  | 0,22  | 0,703073711 | 0,25  | 0,688608911 |
| Cyp3a44    | 0,14  | 0,829299665 | -0,17 | 0,945143056 | -0,16 | 0,867152476 | -0,04 | 0,971149993 | 0,1   | 0,933827144 |
| Cyp3a57    | 0,12  | 0,886889675 | -0,07 | 0,902154431 | 0,24  | 0,675674731 | -0,22 | 0,72415648  | 0,22  | 0,789685904 |
| Cyp3a59    | -0,18 | 0,782369077 | -0,03 | 0,989873399 | -0,77 | 0,542758274 | -0,08 | 0,893255574 | 0,09  | 0,92577365  |
| Cyp4a1     | 0,25  | 0,613990129 | 0,02  | 0,981586987 | 0,01  | 0,99383354  | 0,15  | 0,665832473 | -0,08 | 0,950211199 |
| Cyp4a10    | 0,39  | 0,666546952 | -0,6  | 0,457889449 | -0,79 | 0,37686469  | -0,02 | 0,991453278 | 2,34  | 0,326307411 |
| Cyp4a12a   | 0,15  | 0,887055951 | -0,02 | 0,9860901   | -0,42 | 0,706714392 | 0,29  | 0,519603656 | 0,01  | 0,991206114 |
| Cyp4a12b   | 0,35  | 0,70257166  | 0,14  | 0,91627477  | 0,3   | 0,723987482 | 0,4   | 0,522511755 | 0,34  | 0,705549506 |
| Cyp4a14    | 0,01  | 0,994910518 | -0,07 | 0,958545812 | -0,22 | 0,770526999 | -0,8  | 0,201962253 | 1,89  | 0,490706572 |
| Cyp4a29    | 0,19  | 0,707480624 | 0,24  | 0,817110093 | 0,3   | 0,787905724 | -0,19 | 0,795376505 | 0,47  | 0,708898543 |
| Cyp4a30b   | 0,08  | 0,94727537  | -0,4  | 0,746204894 | 0,15  | 0,897203344 | 1,01  | 0,122555303 | 0,58  | 0,445805207 |
| Cyp4a31    | 0,56  | 0,479545376 | -0,07 | 0,892727342 | -0,75 | 0,11637989  | -1,15 | 0,561974365 | 1,23  | 0,625087577 |
| Cyp4a32    | 0,01  | 0,994380399 | 0,2   | 0,625784044 | 0,35  | 0,470538686 | -0,07 | 0,859908469 | 0,53  | 0,584730932 |
| Cyp4b1     | 0,51  | 0,604403643 | -0,49 | 0,341980182 | -0,14 | 0,94178334  | -4,21 | 0,007876985 | -0,54 | 0,674843991 |
| Cyp4b1-ps2 | 0,04  | 0,932324918 | 0,07  | 0,887005798 | -0,07 | 0,918291931 | -0,2  | 0,617056035 | 0,35  | 0,568291477 |
| Cyp4f13    | 1,1   | 0,197271952 | 1,04  | 0,471640287 | 0     | 0,999931921 | -2,29 | 0,027443269 | -0,17 | 0,854369491 |
| Cyp4f14    | 0,05  | 0,966775766 | -0,51 | 0,256702217 | -0,19 | 0,770526999 | 0,24  | 0,532596579 | -0,21 | 0,741766428 |
| Cyp4f15    | 0,17  | 0,808572184 | -0,21 | 0,842320315 | 0,12  | 0,909717677 | 0,15  | 0,761591561 | -0,14 | 0,848679763 |
| Cyp4f16    | 0,21  | 0,597519827 | 0,22  | 0,691433995 | 0,36  | 0,621644149 | 0,03  | 0,979829655 | -0,15 | 0,890833196 |
| Cyp4f17    | -0,3  | 0,67148567  | 0,34  | 0,80192513  | 0,58  | 0,435912023 | -0,26 | 0,841644929 | 0,05  | 0,980961333 |
| Cyp4f18    | 0,2   | 0,691292423 | 0,29  | 0,823859284 | -0,38 | 0,803963753 | -0,06 | 0,968548873 | 0,56  | 0,431894609 |
| Cyp4f37    | 0,21  | 0,847575977 | 0,07  | 0,935329426 | 0,75  | 0,2805701   | 0,24  | 0,522894482 | 0,1   | 0,902899311 |
| Cyp4f39    | 0,07  | 0,920798295 | -0,17 | 0,800636573 | -0,19 | 0,845856494 | 0,04  | 0,967216871 | -0,55 | 0,508153495 |
| Cyp4f40    | -0,25 | 0,673270664 | 0,22  | 0,828818891 | 0,27  | 0,724249583 | -0,06 | 0,931552941 | 0,34  | 0,471406593 |
| Cyp4f41-ps | 0,36  | 0,562609036 | 0,3   | 0,667097376 | -0,39 | 0,542385406 | -0,02 | 0,974617862 | 0,21  | 0,841160223 |
| Cyp4v3     | -0,13 | 0,944652244 | 0,27  | 0,586770731 | -0,03 | 0,985347628 | 0,1   | 0,963392781 | 0,76  | 0,64934615  |
| Cyp4x1     | -0,01 | 0,985460502 | 0,6   | 0,383504117 | -0,03 | 0,978012085 | -0,16 | 0,904979598 | 0,15  | 0,921063662 |
| Cyp4x1os   | 0,11  | 0,851004463 | -0,22 | 0,79020104  | -0,02 | 0,979374279 | -0,06 | 0,915691108 | 0,06  | 0,950211199 |
| Cyp51      | -1,36 | 0,059686542 | -0,8  | 0,561842393 | 0,72  | 0,552774574 | 0,49  | 0,617560575 | 0,14  | 0,91314596  |
| Cyp7a1     | 0,1   | 0,926452636 | 0,29  | 0,708684603 | -0,23 | 0,757125097 | -0,3  | 0,712701339 | 0,32  | 0,700037168 |
| Cyp7b1     | 0,17  | 0,743090353 | 0,02  | 0,998237793 | -0,01 | 0,994420875 | -1,45 | 0,060016564 | 0,51  | 0,450543672 |
| Cyp8b1     | 0,19  | 0,728608769 | -0,04 | 0,954307545 | -0,36 | 0,538035883 | -0,04 | 0,9579816   | -0,13 | 0,911850421 |
| Cypt12     | 0,04  | 0,958188047 | 0,15  | 0,794706906 | -0,12 | 0,845062212 | -0,07 | 0,874701048 | 0,01  | 0,991628025 |
| Cypt14     | 0     | 0,996622621 | 0,08  | 0,957659362 | -0,33 | 0,483761569 | 0,35  | 0,399865469 | 0,48  | 0,388247203 |
| Cypt15     | 0,13  | 0,829299665 | 0,57  | 0,607752929 | -0,21 | 0,782988471 | 0,06  | 0,913578312 | 0,35  | 0,538868128 |

|               |       |             |       |             |       |             |       |             |       |             |
|---------------|-------|-------------|-------|-------------|-------|-------------|-------|-------------|-------|-------------|
| Cypt2         | 0,03  | 0,966775766 | -0,26 | 0,609576972 | -0,03 | 0,974522248 | -0,14 | 0,749835708 | -0,16 | 0,846306738 |
| Cypt3         | 0,36  | 0,268700978 | 0,15  | 0,826165513 | -0,22 | 0,816883729 | -0,01 | 0,994638711 | 0,47  | 0,341238778 |
| Cypt4         | -0,09 | 0,949241841 | 0,57  | 0,703923817 | -0,13 | 0,898181847 | -0,88 | 0,118734164 | -0,15 | 0,818974537 |
| Cyr61         | -0,51 | 0,306829062 | 0,29  | 0,470430135 | -0,03 | 0,978012085 | 1,66  | 0,032645128 | -0,46 | 0,620783704 |
| Cys1          | -0,31 | 0,828910401 | 0,41  | 0,56994226  | -0,17 | 0,921956183 | -0,75 | 0,536893933 | 0,16  | 0,952971656 |
| Cysltr1       | 0,37  | 0,613990129 | 0,67  | 0,70212029  | -0,47 | 0,757081718 | 0,04  | 0,967866794 | -0,18 | 0,823098095 |
| Cysltr2       | -0,62 | 0,545805455 | -1,07 | 0,43611358  | -1,09 | 0,398303268 | -1,11 | 0,105500593 | 0,08  | 0,947437555 |
| Cysrt1        | 0,06  | 0,970286316 | 0,31  | 0,585221306 | 0     | 0,998071906 | 0,1   | 0,921036173 | -0,1  | 0,938464659 |
| Cystm1        | -0,03 | 0,977315534 | 0,17  | 0,813150671 | 0,39  | 0,484876845 | -1,06 | 0,025514128 | 0,13  | 0,876747929 |
| Cyth1         | -0,1  | 0,903666411 | 0     | 1           | 0,52  | 0,390003485 | -0,53 | 0,393025946 | -0,37 | 0,560939362 |
| Cyth2         | 0,18  | 0,714662474 | 0,03  | 0,970762922 | 0,12  | 0,867704245 | 0,05  | 0,945619692 | -0,22 | 0,700466496 |
| Cyth3         | 0,09  | 0,891156481 | 0,03  | 0,969019461 | 0,05  | 0,96043738  | -0,91 | 0,03497605  | -0,47 | 0,272986942 |
| Cyth4         | -0,29 | 0,752654071 | -0,47 | 0,756514853 | 0,21  | 0,926365431 | 0,37  | 0,588755637 | 0,24  | 0,83628627  |
| Cytip         | 0,41  | 0,393169325 | -0,19 | 0,818597532 | -0,52 | 0,457114777 | 0,23  | 0,682802576 | 0,16  | 0,841522773 |
| Cytl1         | -0,43 | 0,513822814 | -0,51 | 0,705845461 | -1,24 | 0,240270395 | -5,05 | 0,003907268 | -0,59 | 0,275129528 |
| Cyyr1         | 0,31  | 0,486017278 | 0,05  | 0,918694468 | -0,75 | 0,16105114  | -0,08 | 0,896391839 | 0,01  | 0,994116818 |
| D030018L15Rik | -0,06 | 0,94881239  | -0,23 | 0,656294004 | -0,22 | 0,715403033 | 0,28  | 0,52237415  | 0,15  | 0,871104963 |
| D030024E09Rik | 0,32  | 0,490517442 | -0,39 | 0,619501651 | -0,23 | 0,740600774 | -0,38 | 0,499022095 | 0,14  | 0,810276195 |
| D030025E07Rik | 0,11  | 0,846313357 | 0,28  | 0,742043497 | -0,11 | 0,873867385 | 0,08  | 0,886769103 | 0,08  | 0,91461345  |
| D030025P21Rik | -0,06 | 0,913473467 | 0,13  | 0,80192513  | -0,16 | 0,835677021 | -0,21 | 0,522511755 | 0,14  | 0,845510422 |
| D030028A08Rik | 0,04  | 0,973083012 | -0,64 | 0,58096097  | 0,01  | 0,994130625 | 0,28  | 0,566653262 | 0,12  | 0,888378798 |
| D030029J20Rik | -0,25 | 0,572824243 | -0,25 | 0,644819232 | 0,65  | 0,275656366 | 0,19  | 0,714574186 | -0,63 | 0,192448699 |
| D030040B21Rik | -0,03 | 0,960597621 | -0,04 | 0,955360838 | -0,05 | 0,949135765 | -0,75 | 0,07392351  | -0,95 | 0,05100134  |
| D030045P18Rik | -0,13 | 0,84900712  | 0,2   | 0,86198859  | 0,06  | 0,938771378 | -0,37 | 0,581261175 | 0,17  | 0,943179098 |
| D030046N08Rik | 0,56  | 0,269151748 | 0,12  | 0,826782465 | -0,33 | 0,509702247 | -0,03 | 0,95852873  | 0,46  | 0,32673984  |
| D030047H15Rik | -0,18 | 0,785669218 | 0,2   | 0,661734303 | -0,04 | 0,962401213 | 0,06  | 0,910298592 | -0,01 | 0,986917751 |
| D030055H07Rik | -0,1  | 0,897717279 | 0,39  | 0,549813959 | -0,3  | 0,676708199 | -0,45 | 0,246085743 | 0,24  | 0,72393858  |
| D030056L22Rik | 0,44  | 0,496123406 | -0,28 | 0,548847572 | 0,01  | 0,993379272 | 0,13  | 0,803756713 | 0,15  | 0,832266888 |
| D030068K23Rik | -0,33 | 0,822107047 | -0,29 | 0,600955386 | 0,18  | 0,881461218 | 0,63  | 0,23980845  | 0,03  | 0,981677577 |
| D10Jhu81e     | -0,4  | 0,561911764 | -0,09 | 0,953507825 | -0,04 | 0,96736975  | -0,1  | 0,949669541 | 0     | 0,997876986 |
| D10Wsu102e    | -0,63 | 0,536274184 | 0,23  | 0,878725004 | 0,41  | 0,603407852 | 0,52  | 0,661579252 | -0,15 | 0,934745577 |
| D11Wsu47e     | -0,08 | 0,92878551  | -0,1  | 0,938987331 | 0,04  | 0,963591725 | 0,13  | 0,85846312  | 0,09  | 0,936181394 |
| D130007C19Rik | 0,03  | 0,95859912  | 0,01  | 0,9827117   | -0,19 | 0,698662367 | -0,33 | 0,522767386 | 0,09  | 0,940438527 |
| D130009I18Rik | 0,15  | 0,80501188  | -0,23 | 0,702517334 | 0     | 0,998223057 | 0,09  | 0,859503753 | -0,22 | 0,783523817 |
| D130012P04Rik | 0,11  | 0,933239585 | 0,12  | 0,831404974 | 0,07  | 0,959990799 | 0,58  | 0,245208151 | -0,12 | 0,884248437 |

|               |       |             |       |             |       |             |       |             |       |             |
|---------------|-------|-------------|-------|-------------|-------|-------------|-------|-------------|-------|-------------|
| D130017N08Rik | -0,49 | 0,649412093 | -0,42 | 0,696259711 | 0,39  | 0,628427952 | -0,93 | 0,067036636 | -0,51 | 0,601996517 |
| D130020L05Rik | 0,2   | 0,736456663 | 0,27  | 0,670859269 | 0,21  | 0,806102885 | -0,53 | 0,27328094  | -0,82 | 0,307250018 |
| D130040H23Rik | -0,39 | 0,596550801 | 0,5   | 0,666450149 | -0,64 | 0,340237423 | 0,25  | 0,843512544 | 0,4   | 0,681187197 |
| D130043K22Rik | 0,21  | 0,845495686 | -0,11 | 0,897684193 | 0,09  | 0,933825205 | 0,12  | 0,753783861 | -0,05 | 0,967036726 |
| D130046C19Rik | 0,18  | 0,777335496 | -0,79 | 0,200336704 | 0,36  | 0,733983895 | 0,11  | 0,772462401 | 0,24  | 0,843332198 |
| D130050E23Rik | 0,08  | 0,855421712 | -0,05 | 0,916042399 | 0,19  | 0,71649249  | 0,1   | 0,792680799 | -0,01 | 0,993645187 |
| D130052B06Rik | -0,37 | 0,387629943 | 0,06  | 0,906267371 | -0,62 | 0,27037497  | -0,11 | 0,892186579 | -0,28 | 0,802002876 |
| D130062J21Rik | 0,52  | 0,311316821 | -0,29 | 0,793842674 | 0,37  | 0,64759465  | -0,14 | 0,866389915 | -0,36 | 0,699059557 |
| D130079A08Rik | 0,2   | 0,775283193 | -0,16 | 0,733785399 | -0,15 | 0,783406599 | 0,23  | 0,570038672 | 0,09  | 0,914498972 |
| D13ErtD608e   | 0,08  | 0,925510521 | 0,43  | 0,527287574 | -0,13 | 0,836650725 | -0,2  | 0,729835365 | -0,24 | 0,817563348 |
| D16ErtD472e   | 0,3   | 0,599901527 | 0,37  | 0,505731706 | -0,45 | 0,359756591 | 0,28  | 0,388085052 | 0,81  | 0,070081217 |
| D16ErtD519e   | -0,12 | 0,783200207 | 0,03  | 0,968620079 | -0,03 | 0,965539887 | -0,12 | 0,78342209  | -0,05 | 0,954895283 |
| D17ErtD648e   | 0,22  | 0,553849378 | 0,33  | 0,487451484 | -0,11 | 0,861567666 | 0,07  | 0,860025847 | 0,32  | 0,587915673 |
| D17H6S53E     | -0,39 | 0,374579343 | -0,08 | 0,952427593 | 0,12  | 0,930645703 | 0,34  | 0,761558115 | 0,15  | 0,92741476  |
| D17H6S56E-5   | 0,07  | 0,895278749 | 0,05  | 0,919659005 | 0,5   | 0,375756922 | 2,33  | 0,016282847 | 0,39  | 0,640213665 |
| D17Wsu92e     | 0,3   | 0,437618775 | 0,62  | 0,167128192 | -0,77 | 0,142403989 | 0,14  | 0,712869858 | 0,72  | 0,131805653 |
| D1ErtD448e    | -0,24 | 0,714127381 | -0,27 | 0,493580894 | 0,09  | 0,907570167 | -0,19 | 0,716805615 | -0,21 | 0,806799849 |
| D1ErtD622e    | -0,11 | 0,801984719 | 0,1   | 0,901965279 | 0,07  | 0,943788892 | 0,66  | 0,299101502 | 0,4   | 0,619885789 |
| D1Pas1        | 0,07  | 0,942601436 | -0,09 | 0,84786877  | -0,15 | 0,813110365 | 0,01  | 0,988205241 | 0,36  | 0,461371951 |
| D230017M19Rik | 0,1   | 0,928961361 | -0,22 | 0,786394409 | -0,36 | 0,660785678 | -0,12 | 0,905796409 | 0,08  | 0,952753183 |
| D230022J07Rik | -0,14 | 0,784951771 | -0,4  | 0,560787311 | -0,24 | 0,77548994  | 0,05  | 0,945195883 | 0,71  | 0,374439274 |
| D230025D16Rik | 0,07  | 0,95718608  | -0,55 | 0,508112801 | 0,07  | 0,968874924 | -0,26 | 0,71158821  | -0,65 | 0,392707153 |
| D230030E09Rik | -0,28 | 0,461113298 | 0,06  | 0,912535732 | 0,05  | 0,955984004 | -0,03 | 0,948705706 | -0,11 | 0,913274952 |
| D2Bwg1423e    | -0,46 | 0,707502054 | 0,32  | 0,599495018 | -0,44 | 0,707662594 | -0,43 | 0,707579987 | -0,19 | 0,928775639 |
| D2hgdh        | -0,4  | 0,705457389 | -0,01 | 0,995592294 | 0,03  | 0,97915111  | -0,83 | 0,290774064 | -0,44 | 0,779912857 |
| D2Wsu81e      | -0,58 | 0,412300299 | -0,73 | 0,23919586  | 0,64  | 0,210914225 | 0,61  | 0,096085093 | -0,58 | 0,349899668 |
| D330023K18Rik | 0,22  | 0,771904131 | -0,47 | 0,628604582 | -0,26 | 0,707539555 | -0,06 | 0,970534463 | -0,23 | 0,884640084 |
| D330025C20Rik | -0,01 | 0,990894139 | -0,07 | 0,88928164  | 0,18  | 0,710981763 | 0,05  | 0,908141892 | 0,15  | 0,866285506 |
| D330041H03Rik | 0,07  | 0,941549609 | 0,62  | 0,363349607 | -0,06 | 0,950846671 | -0,6  | 0,114764321 | -0,42 | 0,571139447 |
| D330045A20Rik | 0,02  | 0,984124693 | -0,29 | 0,837035571 | 0,22  | 0,815942732 | 0,25  | 0,81096279  | 0,09  | 0,939948423 |
| D330050G23Rik | -0,01 | 0,99027618  | 0,26  | 0,652758123 | -0,48 | 0,598378377 | 0,26  | 0,593121153 | -0,07 | 0,944229706 |
| D330050I16Rik | 0,15  | 0,840909921 | 0,06  | 0,951418475 | -0,03 | 0,971668287 | -0,46 | 0,420008152 | -0,66 | 0,245859871 |
| D3ErtD254e    | -0,41 | 0,535408688 | 0,3   | 0,866917828 | -0,37 | 0,8315526   | 0,32  | 0,734587328 | -0,03 | 0,982779069 |
| D3ErtD751e    | 0,55  | 0,460231397 | -0,17 | 0,900801202 | -0,04 | 0,97209334  | -1,27 | 0,202877508 | -0,61 | 0,593599703 |
| D430001F17Rik | 0,26  | 0,648730873 | 0,3   | 0,71865307  | 0,17  | 0,868054401 | -0,18 | 0,796750321 | -0,27 | 0,765327693 |

|               |       |             |       |             |       |             |       |             |       |             |
|---------------|-------|-------------|-------|-------------|-------|-------------|-------|-------------|-------|-------------|
| D430006K04    | -0,05 | 0,944652244 | -0,26 | 0,7152443   | -0,39 | 0,436827113 | 0,52  | 0,284374871 | 0,55  | 0,34327492  |
| D430018E03Rik | -0,1  | 0,877354681 | -0,07 | 0,889814333 | -0,41 | 0,628048897 | -0,37 | 0,69986269  | -0,12 | 0,939607682 |
| D430019H16Rik | 0,17  | 0,714662474 | -0,01 | 0,996259587 | -0,05 | 0,950862176 | -0,13 | 0,754318983 | -0,19 | 0,767367828 |
| D430020J02Rik | -0,52 | 0,470397003 | -0,69 | 0,223066162 | 1,01  | 0,24320522  | 0,28  | 0,560115638 | -0,06 | 0,97425848  |
| D430036J16Rik | 0     | 0,999288019 | 0,04  | 0,955872959 | -0,03 | 0,981207238 | -0,57 | 0,661916932 | -0,71 | 0,520240481 |
| D430040D24Rik | 0,02  | 0,984124693 | 0,39  | 0,499573414 | -0,11 | 0,908039911 | -0,8  | 0,08482213  | 0,35  | 0,452989679 |
| D430041D05Rik | -0,2  | 0,70137787  | 0,35  | 0,615733281 | 0,04  | 0,959437564 | -0,33 | 0,529366123 | 0,04  | 0,976045403 |
| D430042O09Rik | -0,5  | 0,7494877   | 0,51  | 0,472042875 | 0,31  | 0,713620433 | -0,75 | 0,260892616 | -0,49 | 0,469594536 |
| D430050E20Rik | 0,03  | 0,959985598 | -0,02 | 0,981536227 | 0,15  | 0,796272987 | -0,07 | 0,851926687 | -0,21 | 0,768884521 |
| D4Ertd617e    | 0,41  | 0,651352627 | -0,28 | 0,84786877  | -0,05 | 0,975055092 | -0,05 | 0,96956918  | -0,12 | 0,912250982 |
| D530049I02Rik | -0,13 | 0,856118781 | -0,12 | 0,927073711 | -0,38 | 0,705492321 | -0,2  | 0,698921024 | -0,21 | 0,791800359 |
| D5Ertd577e    | 0,27  | 0,514661743 | 0,36  | 0,599471467 | 0,15  | 0,867543859 | -0,32 | 0,499022095 | -0,18 | 0,830889529 |
| D5Ertd579e    | -0,48 | 0,604692463 | -0,02 | 0,989873399 | -0,46 | 0,692509177 | -0,15 | 0,873610553 | -0,6  | 0,424185651 |
| D5Ertd605e    | -0,09 | 0,908108677 | -0,19 | 0,703041962 | 0,14  | 0,867571963 | 0,1   | 0,80174822  | -0,11 | 0,871978187 |
| D5Ertd615e    | 0,86  | 0,173359555 | 0,26  | 0,80678645  | -0,17 | 0,926971487 | -0,68 | 0,390424873 | 0,98  | 0,417370658 |
| D5Ertd683e    | 0,21  | 0,84900712  | 0,22  | 0,838450577 | 0,16  | 0,911860447 | 0,1   | 0,909873635 | 0,27  | 0,754606703 |
| D630003M21Rik | 0,4   | 0,334676974 | 0,08  | 0,917695989 | -0,18 | 0,867543859 | -0,2  | 0,698921024 | -0,36 | 0,697818445 |
| D630004N19Rik | -0,32 | 0,778869381 | -0,62 | 0,540772465 | 0     | 0,999931921 | -0,75 | 0,324722413 | -0,6  | 0,432720148 |
| D630008O14Rik | 0,01  | 0,991919022 | 0,05  | 0,937377463 | -0,13 | 0,85952125  | 0,34  | 0,35134637  | 0     | 0,995462242 |
| D630010B17Rik | 0,15  | 0,783200207 | -0,06 | 0,95554321  | -0,32 | 0,506209899 | 0,16  | 0,677203644 | 0,21  | 0,731527639 |
| D630013N20Rik | -0,17 | 0,751456663 | 0,02  | 0,994735911 | 0,27  | 0,705980414 | 0,22  | 0,814810741 | 0,66  | 0,555858496 |
| D630014O11Rik | -0,03 | 0,964124037 | -0,04 | 0,953971373 | -0,03 | 0,972482452 | -0,01 | 0,991332249 | -0,1  | 0,899873771 |
| D630022N01Rik | 0,03  | 0,949236157 | 0,01  | 0,994879351 | -0,03 | 0,968742139 | -0,04 | 0,941639261 | -0,12 | 0,887392561 |
| D630023F18Rik | 0,06  | 0,901611846 | 0,24  | 0,723522606 | -0,15 | 0,835677021 | -0,13 | 0,779093746 | 0,36  | 0,631138048 |
| D630024D03Rik | 0,31  | 0,757032046 | -0,25 | 0,593777931 | -0,56 | 0,400488322 | 0,04  | 0,943143586 | 0,28  | 0,723103887 |
| D630029K05Rik | 0,27  | 0,770491977 | -0,15 | 0,748605628 | -0,14 | 0,873457545 | 0,28  | 0,695502157 | 0,36  | 0,746612966 |
| D630033O11Rik | -0,52 | 0,59710379  | 0,05  | 0,919873208 | -0,31 | 0,589982818 | 0,51  | 0,153265608 | 0,08  | 0,923530475 |
| D630036H23Rik | -0,45 | 0,46691413  | 0,29  | 0,812291215 | 0,34  | 0,697504849 | -0,96 | 0,691668858 | 0,61  | 0,829280608 |
| D630039A03Rik | 0,44  | 0,494884125 | 0,18  | 0,696463777 | 0,26  | 0,785676028 | -0,13 | 0,735958592 | -0,07 | 0,940438527 |
| D630041G03Rik | 0,13  | 0,897717279 | 0,4   | 0,589733014 | -0,04 | 0,961800548 | -0,33 | 0,415968391 | -0,06 | 0,960897996 |
| D630044L22Rik | 0,26  | 0,665037431 | -0,31 | 0,748605628 | 0,75  | 0,142173005 | 0,35  | 0,357880396 | 0,2   | 0,820657685 |
| D630045J12Rik | -0,4  | 0,632481896 | -0,27 | 0,708451303 | 0,51  | 0,557758269 | -0,04 | 0,960061698 | 0,02  | 0,984632256 |
| D630045M09Rik | 0,38  | 0,489042022 | 0,12  | 0,841184864 | -0,04 | 0,97372148  | -0,66 | 0,14015932  | -0,62 | 0,241394095 |
| D6Ertd474e    | 0,23  | 0,717407143 | 0     | 1           | 0,27  | 0,552409541 | 0,21  | 0,556095986 | -0,04 | 0,959077429 |
| D6Ertd527e    | 0,14  | 0,764288636 | -0,01 | 0,990294709 | -0,23 | 0,708876309 | 0,07  | 0,868680052 | 0,2   | 0,766085463 |

|               |       |             |       |             |       |             |       |             |       |             |
|---------------|-------|-------------|-------|-------------|-------|-------------|-------|-------------|-------|-------------|
| D6Wsu163e     | -0,16 | 0,845482826 | -0,28 | 0,561842393 | -0,51 | 0,571082984 | -0,45 | 0,262094624 | 0,19  | 0,776907684 |
| D730001G18Rik | -0,07 | 0,937444361 | -0,1  | 0,886149824 | 0,07  | 0,936616368 | 0     | 1           | -0,04 | 0,975441362 |
| D730002M21Rik | 0,09  | 0,888623724 | -0,12 | 0,829391238 | 0,02  | 0,982305856 | 0,19  | 0,619079614 | -0,13 | 0,850383834 |
| D730003I15Rik | -0,11 | 0,903817676 | 0,12  | 0,947107147 | -0,4  | 0,487870604 | -0,98 | 0,036676931 | 0,01  | 0,984638538 |
| D730005E14Rik | 1,06  | 0,08334043  | 0,5   | 0,302028989 | -0,24 | 0,792384474 | -1,88 | 0,009259921 | 0,37  | 0,462558109 |
| D730045A05Rik | 0,07  | 0,896108463 | -0,25 | 0,635138707 | 0,07  | 0,940335002 | 0,02  | 0,979420434 | 0     | 0,998444219 |
| D730045B01Rik | 0,21  | 0,701086418 | 0,09  | 0,884239192 | 0,24  | 0,751758339 | -0,01 | 0,983166423 | 0,02  | 0,982577187 |
| D730048I06Rik | 0,07  | 0,939858259 | 0,23  | 0,808222835 | -0,15 | 0,901032944 | -0,5  | 0,545758277 | -0,36 | 0,587305934 |
| D730050B12Rik | 0,19  | 0,738448626 | -0,1  | 0,937377463 | -0,42 | 0,387442723 | -0,1  | 0,774421273 | 0,23  | 0,694233384 |
| D7ErtD143e    | 0,22  | 0,810101389 | -0,19 | 0,667097376 | 0,28  | 0,707539555 | -0,21 | 0,745759073 | -0,11 | 0,914498972 |
| D7ErtD443e    | 0,13  | 0,879367259 | -0,05 | 0,946885634 | -0,08 | 0,940196318 | -0,01 | 0,978782666 | -0,16 | 0,796586414 |
| D830005E20Rik | 0,13  | 0,865776054 | 0,26  | 0,82256886  | -0,33 | 0,654276436 | -0,01 | 0,993337409 | -0,26 | 0,843351909 |
| D830013O20Rik | 0,09  | 0,854988906 | 0,11  | 0,952427593 | -0,17 | 0,797974252 | 0,62  | 0,0778811   | 0,46  | 0,32673984  |
| D830014E11Rik | 0,6   | 0,376151377 | -0,48 | 0,566263948 | 0,74  | 0,507425636 | -0,17 | 0,868619473 | -0,15 | 0,933011676 |
| D830024N08Rik | -0,03 | 0,959985598 | 0     | 1           | -0,2  | 0,804576742 | -0,16 | 0,726287112 | 0,08  | 0,916297433 |
| D830026I12Rik | -0,94 | 0,148685247 | 0,01  | 0,993789602 | 0,42  | 0,666575428 | -0,12 | 0,834439251 | 0,1   | 0,955137605 |
| D830031N03Rik | -0,15 | 0,862160773 | -0,24 | 0,781665479 | -0,29 | 0,695800929 | 0,09  | 0,854613369 | -0,16 | 0,827404608 |
| D830039M14Rik | -0,12 | 0,821263492 | -0,12 | 0,882847123 | 0,07  | 0,934813979 | 0,12  | 0,736730464 | -0,04 | 0,97425848  |
| D830044D21Rik | -0,04 | 0,949160714 | -0,03 | 0,960071209 | 0,06  | 0,932986275 | 0,17  | 0,635869722 | 0,1   | 0,902226626 |
| D830044I16Rik | -0,44 | 0,381895665 | 0,31  | 0,592596016 | 0,03  | 0,96858449  | 0,1   | 0,932257349 | -0,18 | 0,86811326  |
| D830046C22Rik | 0,29  | 0,632635324 | -0,06 | 0,930192503 | 0,17  | 0,800516313 | -0,82 | 0,063315723 | -0,21 | 0,703079104 |
| D8ErtD738e    | -0,03 | 0,949362206 | -0,21 | 0,583200444 | 0,15  | 0,777417583 | -0,14 | 0,665208114 | -0,14 | 0,824818547 |
| D8ErtD82e     | -0,12 | 0,898783715 | -0,45 | 0,609632892 | 0,83  | 0,194492398 | 1,48  | 0,050515292 | -1,01 | 0,142924421 |
| D930007P13Rik | -0,13 | 0,86343981  | 0,96  | 0,520395205 | 0,03  | 0,986800862 | -0,67 | 0,545177609 | -0,28 | 0,629127591 |
| D930015E06Rik | -0,58 | 0,549437855 | -0,29 | 0,429168189 | 0,92  | 0,264273523 | 0,84  | 0,120821576 | -0,99 | 0,125109483 |
| D930015M05Rik | -0,39 | 0,435472666 | -0,81 | 0,308971244 | -0,17 | 0,899171797 | 0,1   | 0,900529161 | -0,44 | 0,587011728 |
| D930016D06Rik | 0,54  | 0,494787323 | 0,21  | 0,628779499 | -0,11 | 0,894018349 | 0,68  | 0,171625869 | 0,18  | 0,806239654 |
| D930019O06Rik | -0,15 | 0,710008429 | 0,06  | 0,91753901  | -0,09 | 0,873583602 | -0,04 | 0,917720451 | 0,02  | 0,982813638 |
| D930020B18Rik | 0,13  | 0,816710776 | 0,08  | 0,902148738 | 0,03  | 0,973732268 | 0,33  | 0,550164397 | -0,14 | 0,86809582  |
| D930028M14Rik | 0,19  | 0,778869381 | 0,07  | 0,896381982 | -0,03 | 0,977081417 | 0,05  | 0,932489351 | -0,28 | 0,680326767 |
| D930030D11Rik | 0,14  | 0,751534367 | 0,05  | 0,974159037 | 0,23  | 0,798605244 | -0,31 | 0,666001651 | 0,08  | 0,939948423 |
| D930030I03Rik | -0,02 | 0,970938013 | 0,25  | 0,660878613 | -0,24 | 0,755802952 | 0,18  | 0,782438695 | 0,11  | 0,881968395 |
| D930032P07Rik | 0,44  | 0,414793895 | 0,21  | 0,840976412 | 0,29  | 0,749504017 | 0,39  | 0,575996155 | 0,56  | 0,463963526 |
| D930048G16Rik | -0,26 | 0,534498513 | -0,09 | 0,897811179 | 0     | 0,997439771 | 0,13  | 0,726641891 | -0,06 | 0,953297732 |
| D930048N14Rik | 0,03  | 0,981357422 | -0,24 | 0,778589117 | 0,23  | 0,779859477 | 0,18  | 0,873872972 | 0,07  | 0,968130547 |

|        |       |             |       |             |       |             |       |             |       |             |
|--------|-------|-------------|-------|-------------|-------|-------------|-------|-------------|-------|-------------|
| Daam1  | 0,37  | 0,455714377 | 0,39  | 0,296064095 | 0,23  | 0,7674045   | 1,18  | 0,044461135 | -0,03 | 0,980945466 |
| Daam2  | 1     | 0,142684805 | 0,25  | 0,797699451 | 0,09  | 0,909233941 | -1,1  | 0,120266637 | -0,51 | 0,614411697 |
| Dab1   | 0     | 0,999732664 | -0,19 | 0,737558317 | -0,53 | 0,523680014 | 0,33  | 0,414727575 | -0,31 | 0,586118577 |
| Dab2   | -0,7  | 0,15490509  | -0,53 | 0,367968212 | -0,04 | 0,964695682 | 0,56  | 0,21936569  | -0,47 | 0,320055089 |
| Dab2ip | -0,3  | 0,500467644 | -0,75 | 0,229092429 | 0,16  | 0,8096564   | -0,38 | 0,363922515 | -0,9  | 0,083118156 |
| Dach1  | -0,2  | 0,801665973 | -0,21 | 0,839673299 | 0,5   | 0,483029329 | 1,39  | 0,123015352 | 0,05  | 0,977903513 |
| Dach2  | -0,24 | 0,616256614 | -0,21 | 0,672509572 | 0,07  | 0,923350407 | 0,17  | 0,625074198 | -0,4  | 0,392028688 |
| Dact1  | -0,62 | 0,365873297 | -0,25 | 0,670204653 | -0,28 | 0,660920525 | -1,27 | 0,138586782 | 1,4   | 0,043177854 |
| Dact2  | -0,2  | 0,783591449 | 0,55  | 0,352955911 | -0,49 | 0,350755245 | -0,17 | 0,74236057  | -0,03 | 0,975441362 |
| Dact3  | -0,19 | 0,861015375 | 0,03  | 0,972097743 | 0,08  | 0,928065911 | 0,1   | 0,900918368 | -0,15 | 0,881968395 |
| Dad1   | 0,09  | 0,848783415 | -0,08 | 0,882847123 | 0,4   | 0,343594254 | 0,36  | 0,283477648 | -0,06 | 0,942854766 |
| Dag1   | -0,31 | 0,362668226 | -0,11 | 0,855713502 | 0,04  | 0,969570532 | -0,44 | 0,4729993   | -0,26 | 0,754511071 |
| Dagla  | 0,69  | 0,301230942 | 0,74  | 0,30567226  | -0,03 | 0,990836784 | 0,49  | 0,413068386 | -0,05 | 0,967522546 |
| Daglb  | -0,02 | 0,991125401 | -0,82 | 0,224997739 | 0,35  | 0,689058581 | 0,14  | 0,899335603 | -0,07 | 0,95985938  |
| Dalrd3 | 0,23  | 0,691658566 | -0,51 | 0,258971929 | -0,38 | 0,667006799 | 0,12  | 0,847627021 | -0,1  | 0,916173996 |
| Dancr  | 0,52  | 0,707440816 | 1,32  | 0,080905656 | 0,43  | 0,837003818 | 1,85  | 0,042421897 | 0,24  | 0,865866242 |
| Dand5  | 0,75  | 0,109027365 | 0,56  | 0,64119235  | 0,53  | 0,495166869 | -0,29 | 0,515788764 | 0,34  | 0,805875294 |
| Dao    | -0,1  | 0,910863397 | -0,15 | 0,845241534 | -0,21 | 0,786933951 | 0,24  | 0,69151142  | 0,29  | 0,728578071 |
| Dap    | -0,09 | 0,830575431 | -0,5  | 0,385935063 | 0,21  | 0,70782742  | -1,28 | 0,040875837 | -1,22 | 0,026270409 |
| Dap3   | -0,01 | 0,984692479 | -0,75 | 0,432687588 | 0,22  | 0,729031049 | 0,57  | 0,185796276 | -0,27 | 0,767729389 |
| Dapk1  | -0,57 | 0,631544171 | -0,39 | 0,789051952 | -0,99 | 0,251844613 | -0,73 | 0,422943572 | -0,26 | 0,874554354 |
| Dapk2  | -0,91 | 0,376820355 | -1,4  | 0,276578805 | 0,9   | 0,203107553 | 0,73  | 0,321229024 | -1,37 | 0,053685785 |
| Dapk3  | 0,36  | 0,719989394 | 0,21  | 0,702324895 | 0,63  | 0,448189249 | 0,53  | 0,151254716 | 0,01  | 0,991559961 |
| Dapl1  | -0,05 | 0,969707672 | 0,1   | 0,927582737 | 0,04  | 0,97548193  | -1,16 | 0,307127293 | -0,66 | 0,597080822 |
| Dapp1  | -0,16 | 0,912510949 | -0,19 | 0,895950162 | 0,52  | 0,771789829 | 0,81  | 0,605823496 | -0,32 | 0,912250982 |
| Dars   | -0,52 | 0,37286883  | -0,01 | 0,989036108 | 0,6   | 0,488218852 | 0,53  | 0,189130106 | -0,15 | 0,82415332  |
| Dars2  | -0,39 | 0,707502054 | -0,44 | 0,839673299 | 0,12  | 0,940489823 | 0,46  | 0,628020135 | -0,64 | 0,700280961 |
| Daw1   | 0,42  | 0,347321093 | -0,11 | 0,82485467  | -0,04 | 0,973006385 | 0,51  | 0,466105465 | 0,44  | 0,570469434 |
| Daxx   | 1,36  | 0,03062682  | 1,12  | 0,162894971 | -0,94 | 0,235934355 | 0,11  | 0,839333217 | 1,66  | 0,010413745 |
| Dazap1 | -0,57 | 0,279256257 | 0,19  | 0,756369219 | 0,37  | 0,517379736 | 0,15  | 0,905468987 | -0,24 | 0,839824817 |
| Dazap2 | 0,31  | 0,552940583 | 0,1   | 0,825120426 | -0,03 | 0,980644134 | 0,03  | 0,960916827 | -0,11 | 0,891925115 |
| Dazl   | 0,28  | 0,455001921 | -0,18 | 0,703027444 | -0,23 | 0,681506338 | -0,09 | 0,911916626 | -0,29 | 0,740020498 |
| Dbf4   | -0,04 | 0,972418196 | -0,89 | 0,543685328 | 1,17  | 0,287401098 | 2,51  | 0,00507961  | -0,02 | 0,986971861 |
| Dbh    | -0,06 | 0,948538969 | 0,19  | 0,750160982 | 0,23  | 0,772008734 | -0,77 | 0,226196019 | -0,35 | 0,653769438 |
| Dbhos  | -0,47 | 0,311022075 | -0,04 | 0,977204386 | 0,13  | 0,882540073 | 0,05  | 0,94585489  | -0,03 | 0,982321176 |

|          |       |             |       |             |       |             |       |             |       |             |
|----------|-------|-------------|-------|-------------|-------|-------------|-------|-------------|-------|-------------|
| Dbi      | -0,15 | 0,839871081 | -0,44 | 0,352137531 | 0,32  | 0,560376292 | 0,41  | 0,290613738 | -0,07 | 0,947559952 |
| Dbil5    | -0,12 | 0,906952455 | -0,04 | 0,955891382 | -0,03 | 0,971087234 | -0,17 | 0,860201004 | -0,26 | 0,830813323 |
| Dbn1     | -0,12 | 0,802427928 | -0,24 | 0,606605405 | 0,35  | 0,520631989 | 3,44  | 0,006869809 | 0,01  | 0,992370267 |
| Dbnndd1  | 0     | 0,997408426 | -0,18 | 0,750328852 | -0,12 | 0,875385259 | -0,16 | 0,696558026 | -0,01 | 0,992607235 |
| Dbnndd2  | 0,22  | 0,719941262 | 0,55  | 0,602956592 | 0,62  | 0,280727626 | -0,75 | 0,218830021 | 0,16  | 0,879206646 |
| Dbnl     | 0,21  | 0,690305869 | 0,33  | 0,508633526 | -0,39 | 0,583734191 | 0,35  | 0,566129713 | 0,71  | 0,291178873 |
| Dbp      | 0,68  | 0,111767257 | 0,18  | 0,785153081 | 0,23  | 0,889687519 | -1,02 | 0,399678653 | 0,18  | 0,858526809 |
| Dbpht2   | 0,18  | 0,701086418 | 0,24  | 0,802979985 | -0,36 | 0,709814408 | 0,18  | 0,733470088 | 0,16  | 0,866285506 |
| Dbr1     | 0,37  | 0,721378796 | 0,3   | 0,725431195 | 0,76  | 0,215429632 | -0,2  | 0,684716525 | 0,02  | 0,984125319 |
| Dbt      | -0,23 | 0,834886413 | -0,19 | 0,855555857 | 0,76  | 0,658477739 | -0,02 | 0,984136649 | -0,32 | 0,746672639 |
| Dbx1     | 0,02  | 0,971963261 | -0,14 | 0,886728509 | -0,27 | 0,742758388 | 0,05  | 0,915691108 | -0,1  | 0,917844354 |
| Dbx2     | -0,13 | 0,830031987 | 0,24  | 0,712546063 | 0,09  | 0,896728577 | 0,25  | 0,709570719 | 0,21  | 0,762105118 |
| Dcaf10   | -0,43 | 0,536802237 | -0,05 | 0,980615989 | 0,82  | 0,210914225 | 0,5   | 0,395715359 | -0,09 | 0,929780699 |
| Dcaf11   | -0,24 | 0,81354165  | 0,29  | 0,538124718 | -0,31 | 0,678840444 | -0,67 | 0,144044949 | -0,1  | 0,936181394 |
| Dcaf12   | -0,31 | 0,546019769 | -0,05 | 0,944438314 | 0,55  | 0,332937857 | 0,72  | 0,204926783 | 0,04  | 0,975441362 |
| Dcaf12l1 | -0,14 | 0,785012364 | -0,14 | 0,832832099 | -0,21 | 0,740220539 | 0,16  | 0,671346789 | -0,07 | 0,94780268  |
| Dcaf12l2 | 0,1   | 0,879432304 | -0,31 | 0,651587568 | -0,16 | 0,834979811 | 0,3   | 0,362165899 | 0,01  | 0,993925538 |
| Dcaf13   | -0,27 | 0,74764092  | 0,12  | 0,767178812 | 0,5   | 0,522487326 | 0,56  | 0,173468279 | 0,7   | 0,243677524 |
| Dcaf15   | -0,3  | 0,472499405 | -0,26 | 0,668839557 | 0,6   | 0,332958465 | 0,28  | 0,3645238   | -0,11 | 0,864292286 |
| Dcaf17   | -0,65 | 0,539226089 | -0,07 | 0,910688765 | -0,45 | 0,676708199 | -0,37 | 0,612464969 | -0,14 | 0,905842374 |
| Dcaf4    | -0,3  | 0,705457389 | -0,25 | 0,732044571 | 0,84  | 0,135463064 | -0,56 | 0,404221407 | -0,74 | 0,35853581  |
| Dcaf5    | 0,46  | 0,470579894 | 0,3   | 0,41640882  | -0,13 | 0,873303163 | -0,33 | 0,33402875  | -0,15 | 0,825871709 |
| Dcaf6    | -0,06 | 0,911714617 | 0,37  | 0,505971523 | 0,35  | 0,613433145 | 0,11  | 0,813034756 | 0,15  | 0,82515515  |
| Dcaf7    | -0,61 | 0,161688656 | -0,17 | 0,732044571 | 0,01  | 0,994130625 | 0,34  | 0,414522125 | 0,1   | 0,913553402 |
| Dcaf8    | 0,08  | 0,869565514 | -0,15 | 0,882847123 | 0,29  | 0,619328985 | -0,57 | 0,121389007 | -0,55 | 0,268016026 |
| Dcakd    | -0,49 | 0,302609278 | -0,1  | 0,883895522 | 0,06  | 0,955303601 | 0,84  | 0,160306785 | 0,11  | 0,94758725  |
| Dcbld1   | -0,65 | 0,458591721 | -0,71 | 0,209392987 | 0,75  | 0,374422909 | 0,82  | 0,135560136 | -0,78 | 0,202625792 |
| Dcbld2   | 0,84  | 0,179203767 | 0,36  | 0,696303123 | -0,38 | 0,640924712 | 0,29  | 0,670673114 | -0,04 | 0,969927511 |
| Dcc      | -0,44 | 0,249044729 | -0,01 | 1           | -0,43 | 0,483761569 | 0,23  | 0,827764222 | 0,47  | 0,479727901 |
| Dcdc2a   | 0,36  | 0,417261157 | -0,01 | 0,998923508 | 0,07  | 0,932866273 | 0,23  | 0,839567244 | 0,08  | 0,943379679 |
| Dcdc2b   | 0,19  | 0,824667268 | 0,53  | 0,548214384 | -0,27 | 0,689058581 | -0,68 | 0,330267762 | 0,04  | 0,975441362 |
| Dcdc2c   | 0,33  | 0,619165619 | -0,04 | 0,959275482 | -0,41 | 0,571405665 | 0,06  | 0,943143586 | -0,09 | 0,913537201 |
| Dcdc5    | 0     | 0,998769353 | -0,43 | 0,28836262  | -0,18 | 0,834017354 | -0,2  | 0,711624826 | -0,36 | 0,716191367 |
| Dchs1    | -0,66 | 0,151560276 | -0,69 | 0,230051929 | 0,78  | 0,076696168 | 0,52  | 0,339455217 | -0,47 | 0,459584226 |
| Dck      | -0,09 | 0,932546706 | 0,06  | 0,929692416 | -0,96 | 0,193368921 | 0,85  | 0,27199617  | 1,24  | 0,153253301 |

|         |       |             |       |             |       |             |       |             |       |             |
|---------|-------|-------------|-------|-------------|-------|-------------|-------|-------------|-------|-------------|
| Dclk1   | -0,4  | 0,484960336 | 0,07  | 0,980518468 | 0,7   | 0,11588832  | 0,02  | 0,988205241 | -0,13 | 0,872367819 |
| Dclk2   | 0,82  | 0,16010257  | 0,62  | 0,345409693 | -0,56 | 0,509702247 | 0,59  | 0,171665142 | -0,42 | 0,468672987 |
| Dclk3   | -0,1  | 0,903817676 | -0,03 | 0,994137877 | -0,41 | 0,44641331  | -0,07 | 0,917703489 | -0,13 | 0,890833196 |
| Dclre1a | 0,15  | 0,856984761 | 0,13  | 0,751116121 | 0,88  | 0,153175442 | -0,57 | 0,0889583   | 0,03  | 0,980961333 |
| Dclre1b | -0,68 | 0,372648236 | -0,44 | 0,70435132  | 0,1   | 0,961800548 | 0,06  | 0,95906327  | -0,28 | 0,796642361 |
| Dclre1c | 0,05  | 0,970660999 | 0,35  | 0,615698474 | 0,6   | 0,661747229 | -0,76 | 0,084374314 | -0,36 | 0,603671069 |
| Dcn     | 0,3   | 0,854412004 | -0,08 | 0,979338536 | 1,24  | 0,326054745 | -1,83 | 0,276093686 | 0,69  | 0,765419939 |
| Dcp1a   | 0,18  | 0,888623724 | -0,03 | 0,982053677 | 0,41  | 0,700186861 | 0,64  | 0,384120617 | -0,08 | 0,953764773 |
| Dcp1b   | 0,03  | 0,964124037 | 0,28  | 0,624860312 | -0,56 | 0,436827113 | -1,1  | 0,145110841 | -0,16 | 0,859025777 |
| Dcp2    | 0,34  | 0,465708507 | 0,41  | 0,359483031 | -0,51 | 0,472273933 | 0,46  | 0,150463702 | 0,96  | 0,034868271 |
| Dcpp1   | -0,18 | 0,898572877 | 0,39  | 0,842793123 | -0,53 | 0,786838878 | -0,39 | 0,20749844  | 0,66  | 0,36183804  |
| Dcpp2   | 0,11  | 0,890399821 | -0,12 | 0,772977288 | -0,17 | 0,859517858 | -0,02 | 0,967047406 | 0,26  | 0,825680274 |
| Dcpp3   | -0,11 | 0,806351733 | -0,05 | 0,93351279  | -0,41 | 0,777810365 | 0,24  | 0,703627304 | 0,18  | 0,864004866 |
| Dcps    | -0,26 | 0,615931169 | -0,17 | 0,812664394 | 0,36  | 0,747761625 | 0,18  | 0,876895238 | 0,34  | 0,800540569 |
| Dcst1   | -0,36 | 0,667813356 | 0,19  | 0,816543137 | -0,1  | 0,919116989 | 0,1   | 0,825258543 | 0,78  | 0,15148605  |
| Dcst2   | -0,39 | 0,422051509 | 0,19  | 0,689193472 | 0,04  | 0,983471086 | 0,62  | 0,347209883 | 0,31  | 0,852080109 |
| Dcstamp | -0,09 | 0,927051853 | -0,22 | 0,696259711 | -0,35 | 0,549895527 | -0,1  | 0,796446137 | -0,59 | 0,325920244 |
| Dct     | 0,01  | 0,994971889 | 0,2   | 0,769551285 | 0,03  | 0,966359868 | -0,02 | 0,985897275 | 0,02  | 0,986436695 |
| Dctd    | -0,72 | 0,188870392 | -0,35 | 0,35804906  | 0,21  | 0,801755243 | 2,87  | 0,003977829 | -0,69 | 0,503085341 |
| Dctn1   | -0,64 | 0,184710243 | -0,1  | 0,827876494 | 0,26  | 0,732318987 | 0,09  | 0,864719338 | -0,55 | 0,271713687 |
| Dctn2   | -0,03 | 0,966769047 | 0,04  | 0,945374636 | 0,1   | 0,921817943 | 0,27  | 0,667849424 | -0,05 | 0,963675274 |
| Dctn3   | 0,19  | 0,656216055 | -0,05 | 0,940252512 | 0,17  | 0,772782651 | 0,09  | 0,879339892 | -0,1  | 0,911561712 |
| Dctn4   | -0,17 | 0,746776941 | -0,17 | 0,827496723 | 0,27  | 0,636357295 | -0,44 | 0,338457192 | -0,5  | 0,335268519 |
| Dctn5   | -0,1  | 0,886741208 | -0,17 | 0,670859269 | 0,14  | 0,885042765 | 0,13  | 0,706534382 | -0,05 | 0,953297732 |
| Dctn6   | 0,09  | 0,919567534 | -0,47 | 0,493580894 | 0,09  | 0,947847915 | -0,59 | 0,337546712 | -0,36 | 0,625751363 |
| Dctpp1  | -0,32 | 0,560461791 | -1,1  | 0,087315688 | 0,59  | 0,37686469  | 1,28  | 0,025393164 | -0,06 | 0,949140184 |
| Dcun1d2 | 0,37  | 0,600680579 | -0,12 | 0,933320126 | -0,54 | 0,371125662 | -0,45 | 0,643335664 | -0,36 | 0,666758661 |
| Dcun1d3 | 0,12  | 0,839881823 | 0,13  | 0,849511429 | 0,23  | 0,730738549 | 1,1   | 0,036676931 | 0,06  | 0,947559952 |
| Dcun1d4 | 0,32  | 0,729192619 | 0,62  | 0,306414872 | -1,09 | 0,24320522  | -0,11 | 0,843906148 | 0,72  | 0,319920559 |
| Dcun1d5 | 0,17  | 0,743593944 | -0,12 | 0,880821694 | 0,66  | 0,332905005 | 1,28  | 0,021644799 | 0,28  | 0,629100064 |
| Dcx     | 0,28  | 0,421957622 | -0,51 | 0,493580894 | 0,04  | 0,968874924 | 0,09  | 0,832609779 | 0,13  | 0,835191    |
| Dcxr    | -0,4  | 0,554582942 | -0,73 | 0,159624954 | 0,29  | 0,71705844  | -0,76 | 0,04470267  | -1,04 | 0,174362184 |
| Dda1    | -0,1  | 0,835338549 | -0,18 | 0,689924866 | 0,28  | 0,590832576 | 0,52  | 0,325265273 | 0,07  | 0,946463658 |
| Ddah1   | -0,25 | 0,597519827 | -0,39 | 0,48326573  | 0,4   | 0,525871472 | 2,69  | 0,003907268 | -0,21 | 0,832848337 |
| Ddah2   | -0,29 | 0,568104198 | -0,01 | 0,989873399 | 0,39  | 0,451450652 | 0,09  | 0,860410443 | -0,19 | 0,765809384 |



|        |       |             |       |             |       |             |       |             |       |             |
|--------|-------|-------------|-------|-------------|-------|-------------|-------|-------------|-------|-------------|
| Ddb1   | -0,51 | 0,191492041 | -0,57 | 0,24128832  | 0,22  | 0,640924712 | 1,29  | 0,0193598   | -0,12 | 0,864415219 |
| Ddb2   | -0,12 | 0,94727537  | -0,29 | 0,847821325 | 0,45  | 0,430507107 | -0,82 | 0,404009989 | -0,38 | 0,675282484 |
| Ddc    | 0,18  | 0,695486797 | -0,01 | 0,996105203 | -0,25 | 0,719386001 | -0,61 | 0,172485486 | 0,08  | 0,950308536 |
| Ddhd1  | 0,58  | 0,420942329 | 0,68  | 0,644818618 | 0,45  | 0,657277431 | -2,09 | 0,07172877  | -0,31 | 0,789358981 |
| Ddhd2  | 0,19  | 0,877549799 | -0,13 | 0,812677132 | 0,67  | 0,303590987 | -0,91 | 0,150227287 | -0,71 | 0,376217331 |
| Ddi1   | -0,36 | 0,576009654 | 0,11  | 0,855632384 | -0,19 | 0,70365819  | 0,06  | 0,908862851 | 0,22  | 0,778000995 |
| Ddi2   | -0,54 | 0,194613044 | -0,55 | 0,573232957 | 0,34  | 0,685933617 | 0,79  | 0,245505889 | -0,18 | 0,855281866 |
| Ddias  | -0,49 | 0,717112407 | -2,11 | 0,185367049 | 0,79  | 0,60025983  | 2,05  | 0,016626616 | 0,42  | 0,479585604 |
| Ddit3  | 0,34  | 0,477874411 | 0,65  | 0,216491969 | -0,1  | 0,894018349 | -0,85 | 0,227359898 | 0,5   | 0,505746761 |
| Ddit4  | -1,33 | 0,048513596 | -0,01 | 0,999395995 | 0,01  | 0,997394645 | -1,02 | 0,073035707 | -0,68 | 0,280324145 |
| Ddit4l | 0     | 0,998927419 | -0,11 | 0,912137323 | -0,13 | 0,89916929  | -1,37 | 0,022044005 | -0,16 | 0,906338603 |
| Ddn    | 0,09  | 0,909284689 | 0,05  | 0,943713379 | -0,05 | 0,954984367 | 0,06  | 0,928002892 | -0,13 | 0,878471553 |
| Ddo    | -0,12 | 0,853351904 | -0,04 | 0,965042946 | -0,2  | 0,715497532 | -0,18 | 0,827219751 | 0,12  | 0,894958623 |
| Ddost  | -0,17 | 0,676906193 | -0,48 | 0,441593532 | 0,48  | 0,541560473 | 0,64  | 0,237045249 | -0,16 | 0,83415023  |
| Ddr1   | 1,61  | 0,087125838 | 2,31  | 0,046017935 | 0,13  | 0,876483959 | -1,89 | 0,012013815 | -0,19 | 0,795723327 |
| Ddr2   | 0,19  | 0,922118639 | 0,01  | 1           | 0,61  | 0,397772487 | -1,01 | 0,092592682 | -1,53 | 0,016505887 |
| Ddrgk1 | 0,07  | 0,923035054 | 0,17  | 0,84526289  | 0,08  | 0,95633676  | -0,67 | 0,223017467 | 0,17  | 0,792337112 |
| Ddt    | 0,34  | 0,412575527 | -0,02 | 0,994137877 | -0,37 | 0,721369858 | 1,17  | 0,116706163 | 0,28  | 0,899689405 |
| Ddx1   | -0,63 | 0,123013731 | -0,68 | 0,231499374 | 0,27  | 0,698662367 | 0,57  | 0,266071385 | -0,18 | 0,814438115 |
| Ddx10  | -0,17 | 0,753576419 | 0,01  | 0,996105203 | -0,31 | 0,608702079 | 0,45  | 0,375316219 | 0,38  | 0,574017037 |
| Ddx11  | -0,59 | 0,416909288 | -0,85 | 0,284441239 | 0,83  | 0,373051052 | 0,86  | 0,097396401 | -0,88 | 0,166595171 |
| Ddx17  | -0,04 | 0,947732835 | 0,11  | 0,796482292 | -0,32 | 0,484876845 | -0,06 | 0,899335603 | -0,05 | 0,950308536 |
| Ddx18  | -0,84 | 0,184710243 | -0,55 | 0,354667412 | 0,49  | 0,447140999 | 0,33  | 0,29760789  | 0,05  | 0,950965682 |
| Ddx19a | -0,22 | 0,67905469  | -0,24 | 0,796482292 | 0,45  | 0,295720005 | 0,81  | 0,190359582 | 0,34  | 0,586214748 |
| Ddx19b | -0,14 | 0,864995222 | -0,2  | 0,849511429 | 0,4   | 0,751090942 | 0,29  | 0,718237629 | 0,04  | 0,97425848  |
| Ddx20  | -0,26 | 0,854858973 | -0,06 | 0,956491124 | -0,24 | 0,840187016 | -0,23 | 0,733754009 | 0,12  | 0,950158399 |
| Ddx21  | -0,1  | 0,869225685 | -0,16 | 0,826349245 | 0,15  | 0,879319538 | 0,82  | 0,095324781 | 0,4   | 0,4940585   |
| Ddx23  | -0,47 | 0,455001921 | -0,01 | 0,992024201 | 0,15  | 0,909963525 | 0,41  | 0,314372916 | -0,14 | 0,841160223 |
| Ddx24  | 0,21  | 0,68161851  | 0,09  | 0,883093763 | 0,14  | 0,865318296 | 0,13  | 0,859695995 | 0,24  | 0,77360786  |
| Ddx25  | 0,19  | 0,676800971 | -0,37 | 0,487771533 | -0,13 | 0,86935713  | 0,42  | 0,239185309 | 0,19  | 0,838679773 |
| Ddx26b | -0,75 | 0,076386406 | -0,01 | 0,994802028 | 0,38  | 0,730738549 | -1,18 | 0,222276123 | 0,13  | 0,935548264 |
| Ddx27  | -0,62 | 0,355118268 | -0,23 | 0,809683705 | 0,04  | 0,975597943 | 0,53  | 0,192025746 | -0,03 | 0,978981442 |
| Ddx28  | -0,03 | 0,973117883 | 0,04  | 0,95830747  | -0,32 | 0,707539555 | 0,12  | 0,861959213 | -0,38 | 0,638113984 |
| Ddx31  | -0,15 | 0,762249044 | -0,42 | 0,585138173 | 0     | 0,999571656 | 0,21  | 0,799835488 | -0,1  | 0,936246118 |
| Ddx39  | 0,25  | 0,710008429 | 0,16  | 0,889437471 | 0,24  | 0,772008734 | 0,15  | 0,670240531 | 0,34  | 0,512907543 |

|        |       |             |       |             |       |             |       |             |       |             |
|--------|-------|-------------|-------|-------------|-------|-------------|-------|-------------|-------|-------------|
| Ddx39b | 0,58  | 0,557114011 | -0,26 | 0,501997442 | 0,53  | 0,618654041 | 1,05  | 0,025040776 | 0,62  | 0,432621109 |
| Ddx3x  | 0,11  | 0,892124736 | 0,11  | 0,89081665  | -0,42 | 0,57717258  | -0,7  | 0,201268815 | 0,36  | 0,642845938 |
| Ddx3y  | -0,03 | 0,970938013 | 0,3   | 0,842824184 | -0,15 | 0,894239558 | -0,64 | 0,57372642  | -0,36 | 0,763240477 |
| Ddx4   | -0,12 | 0,923180948 | 0,43  | 0,74717977  | 0,03  | 0,970939073 | -0,01 | 0,991962381 | 0,45  | 0,546559718 |
| Ddx41  | -0,06 | 0,909885273 | -0,34 | 0,60183173  | 0,07  | 0,929312183 | 1,2   | 0,060385323 | -0,11 | 0,937446198 |
| Ddx42  | -0,15 | 0,844994243 | -0,02 | 0,981214034 | 0,17  | 0,909963525 | 0,17  | 0,710724384 | -0,23 | 0,721622418 |
| Ddx43  | -0,17 | 0,761457464 | 0,02  | 0,972336944 | -0,2  | 0,747599709 | 0     | 1           | 0,42  | 0,326586862 |
| Ddx46  | -0,52 | 0,25394728  | -0,16 | 0,89081665  | 0,23  | 0,757498725 | 0,57  | 0,308619545 | -0,06 | 0,949751787 |
| Ddx47  | -0,38 | 0,585250756 | 0,24  | 0,666450149 | 0,3   | 0,798320169 | 0,08  | 0,832162054 | -0,12 | 0,867093565 |
| Ddx49  | -0,31 | 0,432091361 | -0,12 | 0,811280211 | 0,2   | 0,712697139 | 0,69  | 0,281862954 | 0,23  | 0,802618378 |
| Ddx5   | 0,04  | 0,950532575 | 0,13  | 0,80192513  | -0,2  | 0,779486228 | -0,26 | 0,447905925 | 0,28  | 0,590339443 |
| Ddx50  | -0,1  | 0,867692799 | -0,33 | 0,549188732 | 0,07  | 0,923350407 | 0,23  | 0,507570518 | 0,14  | 0,898125699 |
| Ddx51  | -0,64 | 0,36631183  | -0,43 | 0,367968212 | 0,22  | 0,844101872 | 0,12  | 0,906675262 | 0     | 0,999595686 |
| Ddx52  | -0,11 | 0,867692799 | 0,08  | 0,93451524  | 0,33  | 0,609745487 | -0,27 | 0,57819548  | 0,03  | 0,97683359  |
| Ddx54  | -0,52 | 0,215932459 | -0,07 | 0,926157704 | 0,11  | 0,878365741 | 0,26  | 0,535443302 | -0,07 | 0,932345053 |
| Ddx55  | -0,03 | 0,983516046 | 0,21  | 0,597797624 | -0,6  | 0,227551434 | 0,37  | 0,546441525 | 0,62  | 0,343706058 |
| Ddx56  | -0,3  | 0,527262065 | -0,41 | 0,314703215 | 0,18  | 0,82622365  | 0,13  | 0,728291963 | -0,27 | 0,668008337 |
| Ddx58  | 0,04  | 0,948926586 | 0,51  | 0,226105092 | -0,49 | 0,386334316 | -0,27 | 0,528195194 | 0,3   | 0,592460098 |
| Ddx59  | -0,02 | 0,991919022 | 0,33  | 0,728434379 | 0,34  | 0,675674731 | -0,92 | 0,127800767 | -0,09 | 0,925747738 |
| Ddx6   | -0,01 | 0,993175772 | 0,2   | 0,680709276 | 0,01  | 0,997220401 | 0,09  | 0,900530968 | -0,07 | 0,94920559  |
| Ddx60  | 0,13  | 0,93348097  | 0,53  | 0,699652464 | -1,01 | 0,13589176  | -1,14 | 0,219519453 | 0,5   | 0,377468998 |
| Deaf1  | -0,1  | 0,864995222 | -0,23 | 0,655693341 | 0,31  | 0,647804826 | 0,22  | 0,50215632  | 0     | 0,994116818 |
| Dear1  | 0,05  | 0,928318035 | 0     | 1           | -0,11 | 0,881441308 | 0,27  | 0,461824013 | 0,1   | 0,876666201 |
| Deb1   | -0,14 | 0,895278749 | -0,41 | 0,559718502 | 0,66  | 0,298160873 | 0,29  | 0,799905633 | -0,01 | 0,9939542   |
| Decr1  | -0,58 | 0,179001759 | -0,32 | 0,765325717 | 0,03  | 0,987208663 | 0,3   | 0,389492505 | -0,2  | 0,794570285 |
| Decr2  | -0,13 | 0,859481811 | -0,18 | 0,824372931 | 0,91  | 0,399585442 | 0,24  | 0,849520464 | -0,46 | 0,708898543 |
| Dedd   | -0,13 | 0,799359492 | 0,36  | 0,450997698 | 0,37  | 0,659204194 | -0,13 | 0,895878968 | 0,21  | 0,853251097 |
| Dedd2  | -0,42 | 0,327798253 | -0,33 | 0,686776838 | 0,09  | 0,95328517  | -0,37 | 0,66966958  | 0,06  | 0,953297732 |
| Def6   | -0,28 | 0,531870009 | 0,51  | 0,56342776  | -0,14 | 0,881803555 | -0,75 | 0,13409404  | -0,57 | 0,452376077 |
| Def8   | -0,54 | 0,343457563 | -0,18 | 0,836620305 | 0,38  | 0,71773035  | 0,76  | 0,460307888 | -0,51 | 0,681597394 |
| Defa17 | 0,28  | 0,493455979 | -0,15 | 0,909329669 | -0,17 | 0,757980709 | 0,02  | 0,970931237 | -0,04 | 0,96176496  |
| Defa21 | -0,22 | 0,717369508 | -0,21 | 0,765180904 | -0,12 | 0,876684089 | 0,27  | 0,609350605 | -0,16 | 0,861056054 |
| Defa22 | -0,03 | 0,965482773 | 0,07  | 0,882847123 | -0,2  | 0,818840027 | 0,22  | 0,577432583 | 0,35  | 0,681924457 |
| Defa24 | -0,32 | 0,617280733 | -0,08 | 0,93451524  | 0,14  | 0,806102885 | 0,07  | 0,942121869 | 0,13  | 0,864166878 |
| Defa25 | 0,15  | 0,701627731 | 0,14  | 0,761929694 | 0,07  | 0,916366871 | 0,12  | 0,795196848 | -0,03 | 0,97425848  |

|           |       |             |       |             |       |             |       |             |       |             |
|-----------|-------|-------------|-------|-------------|-------|-------------|-------|-------------|-------|-------------|
| Defa26    | -0,15 | 0,828767158 | 0,25  | 0,609361686 | -0,36 | 0,674253263 | -0,27 | 0,778559088 | 0,06  | 0,980961333 |
| Defa3     | -0,04 | 0,957273909 | -0,13 | 0,862565349 | 0,43  | 0,637321546 | -0,24 | 0,630104458 | -0,11 | 0,904745788 |
| Defa-ps1  | 0,19  | 0,742958309 | 0,19  | 0,761404909 | 0,04  | 0,963221639 | 0,08  | 0,832162054 | 0,28  | 0,608004947 |
| Defa-ps12 | -0,02 | 0,978126898 | 0,12  | 0,898952381 | -0,35 | 0,465936592 | -0,08 | 0,866054559 | -0,28 | 0,616797608 |
| Defa-ps13 | 0,18  | 0,758067417 | 0,14  | 0,862088357 | 0,11  | 0,853753298 | 0,15  | 0,691668858 | 0,54  | 0,22704245  |
| Defa-rs1  | -0,22 | 0,770656127 | -0,37 | 0,527789901 | 0,29  | 0,677766266 | 0,11  | 0,849012867 | -0,07 | 0,947559952 |
| Defa-rs10 | 0,23  | 0,614878886 | -0,03 | 0,952099316 | -0,15 | 0,824743005 | 0,02  | 0,963392781 | 0,32  | 0,551972106 |
| Defa-rs12 | -0,04 | 0,957563967 | 0,09  | 0,885711977 | -0,26 | 0,751201307 | 0,48  | 0,229859806 | 0,21  | 0,743091876 |
| Defb1     | -0,03 | 0,956072199 | -0,02 | 0,983071427 | 0,04  | 0,956894731 | 0,09  | 0,885417869 | -0,05 | 0,969617491 |
| Defb10    | 0,17  | 0,803291325 | 0     | 1           | 0,11  | 0,864411302 | 0,08  | 0,923775458 | -0,35 | 0,631872562 |
| Defb11    | 0,07  | 0,958535933 | 0,29  | 0,88741189  | 0,29  | 0,69297088  | 0,25  | 0,809831647 | 0,54  | 0,735152891 |
| Defb12    | 0,23  | 0,664456582 | 0,41  | 0,714148439 | 0,05  | 0,964708966 | -0,42 | 0,418849726 | 0,18  | 0,849560772 |
| Defb13    | 0,39  | 0,546449654 | -0,24 | 0,70423886  | 0,24  | 0,744387748 | 0,14  | 0,747003908 | 0,25  | 0,781289353 |
| Defb14    | 0,03  | 0,964378908 | -0,03 | 0,958856577 | -0,22 | 0,711678713 | -0,1  | 0,832587841 | -0,11 | 0,891925115 |
| Defb15    | 0,02  | 0,989017567 | 0,04  | 0,964264505 | -0,11 | 0,867543859 | -0,74 | 0,134154088 | -0,05 | 0,96176496  |
| Defb18    | 0,24  | 0,632420805 | 0,06  | 0,915784454 | 0,12  | 0,823823322 | 0,01  | 0,983166423 | 0,12  | 0,862867603 |
| Defb19    | 0,18  | 0,712165686 | 0,11  | 0,855261337 | -0,14 | 0,879319538 | -0,39 | 0,472069042 | -0,17 | 0,797293554 |
| Defb2     | 0,05  | 0,939308558 | -0,21 | 0,829770627 | 0,05  | 0,956894731 | -0,44 | 0,547475705 | 0,11  | 0,900126162 |
| Defb20    | 0,09  | 0,902876393 | 0,16  | 0,849511429 | 0     | 0,999931921 | -0,41 | 0,234549057 | 0,1   | 0,937280132 |
| Defb21    | -0,16 | 0,898086998 | 0,47  | 0,371260597 | -0,04 | 0,965656549 | 0,63  | 0,685043191 | 0,31  | 0,869113953 |
| Defb22    | -0,07 | 0,9231839   | 0,33  | 0,487477927 | 0     | 0,997237286 | -0,26 | 0,483514634 | 0,29  | 0,803654898 |
| Defb23    | -0,19 | 0,759147139 | -0,24 | 0,703923817 | -0,41 | 0,724675525 | 0,02  | 0,985095612 | -0,29 | 0,808947208 |
| Defb25    | 0,4   | 0,43796507  | 0,2   | 0,781665479 | -0,68 | 0,163016798 | -0,14 | 0,85301747  | 0,28  | 0,68987325  |
| Defb26    | 0     | 0,997888714 | -0,03 | 0,958545812 | -0,22 | 0,708522391 | 0,08  | 0,827219751 | 0,05  | 0,954118891 |
| Defb28    | -0,18 | 0,644756656 | -0,27 | 0,661304553 | 0,48  | 0,546857162 | -0,14 | 0,866054559 | -0,31 | 0,591481433 |
| Defb29    | 0,24  | 0,54401985  | 0,03  | 0,965039248 | -0,16 | 0,838280035 | 0,24  | 0,718237629 | -0,09 | 0,947901649 |
| Defb3     | -0,07 | 0,895871179 | 0,05  | 0,926157704 | -0,31 | 0,567918713 | 0,06  | 0,941093315 | 0,21  | 0,800540569 |
| Defb30    | -0,28 | 0,682117535 | -0,01 | 0,996105203 | -0,17 | 0,853976176 | 0,27  | 0,553528754 | 0,12  | 0,889518182 |
| Defb33    | -0,09 | 0,85110723  | 0,11  | 0,893671357 | -0,06 | 0,946478083 | -0,14 | 0,795911056 | -0,1  | 0,920933839 |
| Defb34    | 0,16  | 0,845137004 | 0,05  | 0,934294134 | -0,16 | 0,780285009 | -0,03 | 0,94870165  | 0,2   | 0,760401775 |
| Defb35    | 0,23  | 0,714127381 | -0,02 | 0,981758111 | -0,04 | 0,956894731 | 0,5   | 0,121193897 | 0,31  | 0,541403235 |
| Defb36    | 0,15  | 0,741182094 | 0,3   | 0,664787536 | -0,28 | 0,640810851 | -0,13 | 0,808887294 | 0,05  | 0,956610289 |
| Defb37    | -0,06 | 0,913744801 | -0,07 | 0,891533665 | -0,03 | 0,973732268 | 0     | 0,996578101 | 0,19  | 0,78532501  |
| Defb38    | 0,01  | 0,995165528 | -0,09 | 0,850776298 | -0,18 | 0,762549825 | -0,05 | 0,930079385 | -0,09 | 0,911780802 |
| Defb39    | 0,05  | 0,947577073 | -0,01 | 0,996259587 | 0,08  | 0,935978536 | 0     | 1           | -0,21 | 0,752321406 |

|           |       |             |       |             |       |             |       |             |       |             |
|-----------|-------|-------------|-------|-------------|-------|-------------|-------|-------------|-------|-------------|
| Defb4     | -0,28 | 0,469049834 | 0,02  | 0,981906101 | -0,04 | 0,959862254 | -0,07 | 0,87148686  | -0,33 | 0,569309426 |
| Defb40    | 0,04  | 0,964124037 | 0,33  | 0,524532064 | -0,27 | 0,698473929 | 0,16  | 0,780811379 | 0,26  | 0,762196407 |
| Defb41    | 0,16  | 0,892124736 | -0,04 | 0,958856577 | -0,09 | 0,911634383 | -0,17 | 0,728249817 | -0,12 | 0,847312006 |
| Defb42    | -0,04 | 0,944546118 | 0,17  | 0,83443949  | -0,01 | 0,993379272 | -0,43 | 0,471387138 | 0,14  | 0,911780802 |
| Defb43    | -0,41 | 0,527262065 | -0,11 | 0,839277519 | -0,26 | 0,792964271 | 0     | 1           | -0,09 | 0,918891648 |
| Defb44-ps | -0,07 | 0,882539359 | -0,01 | 0,992017084 | -0,1  | 0,883534784 | 0,02  | 0,970931237 | 0,02  | 0,979392852 |
| Defb45    | -0,2  | 0,670542104 | 0,21  | 0,756778611 | -0,12 | 0,925245169 | -0,34 | 0,486374283 | -0,12 | 0,865866242 |
| Defb46    | 0,1   | 0,803761785 | 0,01  | 0,992175086 | -0,04 | 0,965656549 | 0,11  | 0,763279048 | 0,01  | 0,992890723 |
| Defb47    | -0,05 | 0,962030279 | -0,17 | 0,77148563  | -0,03 | 0,989772079 | 0,11  | 0,785767773 | -0,12 | 0,865258929 |
| Defb48    | 0,15  | 0,7830424   | -0,11 | 0,855632384 | -0,24 | 0,723585366 | 0,23  | 0,548754369 | 0,25  | 0,682113443 |
| Defb5     | -0,42 | 0,427971395 | -0,09 | 0,897645724 | 0,07  | 0,94665439  | 0,21  | 0,572994509 | -0,04 | 0,955836352 |
| Defb50    | 0,04  | 0,959985598 | -0,24 | 0,611052267 | -0,34 | 0,501058575 | 0,11  | 0,899413504 | -0,02 | 0,990633766 |
| Defb6     | 0,07  | 0,904491579 | 0,23  | 0,77148563  | -0,41 | 0,327214144 | -0,33 | 0,431967511 | -0,32 | 0,638780444 |
| Defb7     | 0,07  | 0,923532124 | 0,71  | 0,218471516 | -0,02 | 0,986800862 | -0,21 | 0,591646397 | 0,24  | 0,790424343 |
| Defb8     | -0,63 | 0,151560276 | -0,17 | 0,866255683 | -0,19 | 0,745684811 | 0,32  | 0,532243296 | -0,11 | 0,913934839 |
| Defb9     | 0,06  | 0,926692467 | -0,03 | 0,970020205 | 0,01  | 0,991568687 | 0,12  | 0,742291133 | 0,04  | 0,957620856 |
| Degs1     | -0,05 | 0,922118639 | 0,06  | 0,904309723 | 0,16  | 0,797422121 | 1,97  | 0,012175785 | 0,23  | 0,843403563 |
| Degs2     | -0,05 | 0,965991176 | 0,01  | 0,993221425 | -0,42 | 0,501664412 | -0,38 | 0,220608748 | -0,17 | 0,765419939 |
| Dek       | -0,6  | 0,25387015  | -0,7  | 0,50268955  | 0,37  | 0,633671846 | -0,13 | 0,896070119 | 0,26  | 0,69845137  |
| Dennd1a   | 0,07  | 0,926007268 | 0,02  | 0,994137877 | -0,16 | 0,820614211 | -0,87 | 0,094807104 | -0,24 | 0,748710615 |
| Dennd1b   | 0,34  | 0,600313897 | 0,91  | 0,590722193 | 0,02  | 0,99155492  | -0,68 | 0,35134637  | -0,42 | 0,586214748 |
| Dennd1c   | 0,52  | 0,496123406 | 0,58  | 0,716437544 | 0,04  | 0,987208663 | -0,86 | 0,074231799 | -0,18 | 0,923040447 |
| Dennd2a   | -0,08 | 0,955200574 | 0,08  | 0,95021587  | 0,22  | 0,76318151  | -0,41 | 0,560158352 | -0,01 | 0,993958324 |
| Dennd2c   | 0,47  | 0,419180544 | 0,14  | 0,904748854 | -0,44 | 0,619328985 | -0,91 | 0,301663719 | 0,09  | 0,942990206 |
| Dennd2d   | -0,38 | 0,566856976 | 0,1   | 0,878240984 | 0,53  | 0,404341148 | -0,31 | 0,610149813 | 0,63  | 0,50754323  |
| Dennd3    | 0,56  | 0,201327965 | 0,39  | 0,438549879 | -0,73 | 0,201202557 | -1,4  | 0,014795086 | -0,09 | 0,912513224 |
| Dennd4a   | 0,13  | 0,883130741 | 0,15  | 0,889110254 | -0,01 | 0,993379272 | 0,91  | 0,167766415 | -0,13 | 0,861174316 |
| Dennd4b   | -0,13 | 0,84241758  | -0,28 | 0,771864179 | 0,22  | 0,791504463 | -0,88 | 0,266021355 | -0,65 | 0,499998316 |
| Dennd4c   | 0,06  | 0,944311955 | -0,07 | 0,914962572 | 0,16  | 0,856218874 | 0,1   | 0,827219751 | 0,13  | 0,853107295 |
| Dennd5a   | -0,35 | 0,720440968 | -0,1  | 0,864989815 | 0,24  | 0,628048897 | -0,32 | 0,380649619 | -0,53 | 0,36077464  |
| Dennd5b   | -0,2  | 0,803737003 | -0,06 | 0,957382941 | 0,24  | 0,712697139 | -0,44 | 0,308619545 | -0,32 | 0,593298551 |
| Dennd6a   | 0,01  | 0,996233334 | -0,06 | 0,962980292 | 0,88  | 0,375756922 | -0,69 | 0,159341719 | -0,16 | 0,791840213 |
| Dennd6b   | 0,96  | 0,174679822 | 1,37  | 0,147949735 | -1,25 | 0,077917903 | -0,57 | 0,6502939   | 0,24  | 0,875713596 |
| Denr      | -0,09 | 0,874146026 | 0,04  | 0,981415366 | 0,45  | 0,4814931   | 0,09  | 0,829768734 | 0,26  | 0,658322776 |
| Depdc1a   | -0,93 | 0,226269901 | -1,45 | 0,196295439 | 1,61  | 0,114280228 | 2,07  | 0,093220352 | -1,29 | 0,066861241 |

|         |       |             |       |             |       |             |       |             |       |             |
|---------|-------|-------------|-------|-------------|-------|-------------|-------|-------------|-------|-------------|
| Depdc1b | -0,23 | 0,540504193 | -0,25 | 0,790939978 | 0,14  | 0,861307315 | 0,76  | 0,320191783 | 0,02  | 0,990633766 |
| Depdc5  | -0,39 | 0,530325922 | 0,42  | 0,406817158 | 0,37  | 0,630805418 | -0,62 | 0,27273748  | -0,21 | 0,800540569 |
| Depdc7  | 0,04  | 0,97454391  | 0,22  | 0,882847123 | 1,72  | 0,087990365 | -0,7  | 0,600327117 | -0,2  | 0,952753183 |
| Deptor  | -0,81 | 0,138092806 | -0,02 | 0,994137877 | 0,64  | 0,321761132 | -0,8  | 0,252992148 | -0,14 | 0,83990694  |
| Dera    | -0,17 | 0,819613702 | -0,76 | 0,277568816 | 0,33  | 0,560191012 | 1,73  | 0,081353857 | -1,17 | 0,201664516 |
| Derl1   | -0,25 | 0,575127945 | -0,07 | 0,89034555  | -0,07 | 0,928438649 | 0,25  | 0,667849424 | 0,16  | 0,844265172 |
| Derl2   | 0,22  | 0,840909921 | -0,19 | 0,868538818 | 0,27  | 0,857100866 | 0,18  | 0,770901637 | 0,08  | 0,943913544 |
| Derl3   | -0,06 | 0,932826874 | 0,22  | 0,87892334  | -0,39 | 0,744020247 | -0,28 | 0,74417234  | -0,17 | 0,876418697 |
| Des     | -0,56 | 0,640236418 | 0,45  | 0,747928263 | -0,39 | 0,823823322 | -1,4  | 0,069737057 | -0,97 | 0,210816646 |
| Desi1   | -0,23 | 0,738714467 | -0,26 | 0,545116169 | 0,78  | 0,151177488 | 0,91  | 0,156363909 | -0,33 | 0,703670469 |
| Desi2   | -0,07 | 0,919482942 | -0,31 | 0,436556718 | 0,43  | 0,688126003 | 1,24  | 0,133487735 | 0,01  | 0,992406971 |
| Det1    | -0,21 | 0,884369316 | -0,42 | 0,561562373 | 0,25  | 0,843617662 | -0,17 | 0,767714535 | -0,5  | 0,606740281 |
| Dexi    | 0,25  | 0,545426845 | -0,07 | 0,925981858 | 0,26  | 0,814376912 | 0,43  | 0,496635806 | 0,13  | 0,885872093 |
| Dffa    | -0,58 | 0,153824107 | -0,23 | 0,689645531 | 0,23  | 0,821418477 | -0,11 | 0,827764222 | -0,68 | 0,193796626 |
| Dffb    | 0,49  | 0,422775151 | 0,58  | 0,599495018 | 0,19  | 0,874098993 | 0,12  | 0,939446012 | 0,09  | 0,940092696 |
| Dfna5   | 0,5   | 0,287459734 | -0,22 | 0,68640574  | -0,32 | 0,473499244 | 0,05  | 0,963392781 | 0,25  | 0,874342066 |
| Dfnb59  | 0,33  | 0,586458491 | 0,12  | 0,809651957 | -0,17 | 0,833493578 | -0,35 | 0,51910611  | 0,43  | 0,726042963 |
| Dgat1   | -0,17 | 0,68556695  | 0,27  | 0,615288453 | -0,65 | 0,116395149 | -0,69 | 0,209577674 | 0,51  | 0,421550906 |
| Dgat2   | -0,02 | 0,982877855 | -0,72 | 0,548864888 | 1,32  | 0,230761043 | -0,02 | 0,99361557  | -0,06 | 0,973999283 |
| Dgat2l6 | 0,52  | 0,696950475 | 0,09  | 0,927323556 | 0,21  | 0,811424918 | 0,54  | 0,197646348 | 0,26  | 0,684732512 |
| Dgcr14  | 0,05  | 0,950532575 | -0,19 | 0,780639887 | 0,41  | 0,37970041  | -0,04 | 0,953211513 | -0,27 | 0,607874711 |
| Dgcr2   | -0,34 | 0,621890075 | -0,65 | 0,22001825  | 0,78  | 0,286316311 | -0,17 | 0,62296101  | -0,77 | 0,167679595 |
| Dgcr6   | -0,24 | 0,705404186 | 0,02  | 0,994802028 | 0,78  | 0,427062305 | 0,35  | 0,581624426 | -0,46 | 0,673120647 |
| Dgcr8   | -0,19 | 0,824010969 | -0,69 | 0,548864888 | 0,79  | 0,198485832 | 0,16  | 0,899335603 | -0,63 | 0,466753993 |
| Dgka    | -0,32 | 0,634165685 | 0,01  | 0,994390365 | 0,17  | 0,809062815 | -0,69 | 0,10079856  | -0,29 | 0,583434544 |
| Dgkb    | 0,19  | 0,854532238 | -0,22 | 0,793682143 | -0,3  | 0,660517013 | -2,64 | 0,010913137 | -1,62 | 0,026772305 |
| Dgkd    | -0,4  | 0,562327928 | -0,23 | 0,767178812 | 0,05  | 0,969570532 | 0,53  | 0,319234181 | -0,24 | 0,789861425 |
| Dgke    | -0,88 | 0,336447809 | 0,1   | 0,940046211 | 0,08  | 0,920926565 | 0,12  | 0,874150982 | -0,48 | 0,549951038 |
| Dgkeos  | 0,56  | 0,227753128 | -0,29 | 0,609769897 | -0,01 | 0,99407001  | 0,16  | 0,743891682 | -0,18 | 0,887719506 |
| Dgkg    | -0,06 | 0,964154899 | 0,43  | 0,402975324 | -0,03 | 0,987208663 | -1,74 | 0,141866757 | -0,89 | 0,445839943 |
| Dgkh    | 0,58  | 0,132779189 | 0,26  | 0,686540452 | -0,5  | 0,506222058 | 0,85  | 0,165842841 | 0,18  | 0,853107295 |
| Dgki    | -0,06 | 0,959466597 | -0,16 | 0,775155136 | 0,04  | 0,959681116 | 0,63  | 0,146781548 | -0,12 | 0,885872093 |
| Dgkk    | 0,1   | 0,93115708  | -0,04 | 0,966078321 | -0,27 | 0,715497532 | -0,16 | 0,838806433 | -0,34 | 0,588258068 |
| Dgkq    | 0,29  | 0,822107047 | -0,16 | 0,894557207 | 0     | 0,998425248 | -0,37 | 0,684777287 | 0,18  | 0,902802615 |
| Dgkz    | -0,44 | 0,348159587 | -0,32 | 0,389273523 | -0,04 | 0,967032016 | -0,06 | 0,91104652  | -0,62 | 0,321751898 |

|          |       |             |       |             |       |             |       |             |       |             |
|----------|-------|-------------|-------|-------------|-------|-------------|-------|-------------|-------|-------------|
| Dguok    | -0,03 | 0,95736548  | 0,28  | 0,635138707 | -0,13 | 0,824306509 | -1,23 | 0,039439849 | -0,08 | 0,938464659 |
| Dhcr24   | -1,04 | 0,099229964 | -1,25 | 0,310525594 | 1,84  | 0,069490259 | 0,61  | 0,701007758 | 0,33  | 0,884047752 |
| Dhcr7    | -0,76 | 0,376305612 | -0,82 | 0,214378713 | 1,65  | 0,19907753  | 0,39  | 0,698243632 | -0,89 | 0,677687906 |
| Dhdds    | -0,2  | 0,701230948 | -0,02 | 0,983071427 | 1,01  | 0,225246975 | 0,41  | 0,686374896 | -0,28 | 0,825564898 |
| Dhdh     | 0,13  | 0,820023436 | 0,53  | 0,387812651 | 0,15  | 0,913228427 | -0,59 | 0,339455217 | -0,36 | 0,66411916  |
| Dhfr     | -1,08 | 0,111767257 | -1,52 | 0,273317646 | 0,55  | 0,339833202 | 2,44  | 0,048170582 | -0,15 | 0,952619747 |
| Dhh      | -0,2  | 0,836503781 | -0,05 | 0,989873399 | -0,34 | 0,713314296 | -2,25 | 0,038569152 | -0,02 | 0,991216325 |
| Dhodh    | 0,18  | 0,8993604   | -0,45 | 0,842663656 | -0,13 | 0,890499122 | 0,17  | 0,807561419 | 0,13  | 0,952718905 |
| Dhps     | -0,3  | 0,588801063 | 0,06  | 0,944864292 | 0,62  | 0,409295824 | -0,35 | 0,323020866 | 0,4   | 0,48837696  |
| Dhrs1    | -0,11 | 0,850491134 | 0,08  | 0,877660987 | 0,68  | 0,509702247 | 0,52  | 0,158478976 | -0,44 | 0,335679372 |
| Dhrs11   | -0,48 | 0,676906193 | 0,06  | 0,927496936 | -0,08 | 0,950846671 | -0,45 | 0,633611025 | -0,63 | 0,518593772 |
| Dhrs13   | -0,1  | 0,909885273 | 0,21  | 0,790939978 | 0,06  | 0,922971065 | 0,01  | 0,99804571  | 0,09  | 0,954298589 |
| Dhrs13os | -0,01 | 0,986604551 | -0,14 | 0,785128233 | -0,44 | 0,404341148 | 0,02  | 0,971100918 | -0,16 | 0,819072786 |
| Dhrs2    | 0,39  | 0,546026761 | -0,4  | 0,656542439 | 0,21  | 0,761861872 | 0,38  | 0,548057593 | 0,2   | 0,859412704 |
| Dhrs3    | -0,57 | 0,430723846 | -0,23 | 0,88741189  | -0,78 | 0,240270395 | -3,11 | 0,004464713 | -0,4  | 0,559845734 |
| Dhrs4    | -0,7  | 0,271043284 | -0,53 | 0,619501651 | 0,15  | 0,782903557 | 0,32  | 0,688041015 | -0,12 | 0,916173996 |
| Dhrs7    | -0,54 | 0,239601221 | 0,15  | 0,845663274 | -0,16 | 0,841563482 | -1,24 | 0,157704641 | 0,32  | 0,758052028 |
| Dhrs7b   | -0,36 | 0,452266722 | -0,35 | 0,683509429 | 0,6   | 0,637732179 | 0,18  | 0,646409335 | -0,49 | 0,313564306 |
| Dhrs7c   | 0,17  | 0,818182081 | 0,02  | 0,989873399 | 0,09  | 0,937096585 | 0,24  | 0,661916932 | 0,06  | 0,961880445 |
| Dhrs9    | -0,14 | 0,771261237 | -0,14 | 0,901000778 | -0,18 | 0,894040977 | -0,25 | 0,75555577  | -0,35 | 0,552530097 |
| Dhrsx    | 0,03  | 0,963228289 | 0,18  | 0,726538201 | 0,22  | 0,691590466 | -0,02 | 0,967866794 | 0     | 0,996891855 |
| Dhtkd1   | -0,2  | 0,778869381 | 0,33  | 0,807100558 | -0,08 | 0,911601881 | -0,33 | 0,649391541 | -0,1  | 0,934185668 |
| Dhx15    | -0,43 | 0,239601221 | -0,18 | 0,712546063 | 0,39  | 0,401629068 | 0,29  | 0,498825358 | -0,07 | 0,946185373 |
| Dhx16    | 0,13  | 0,836503781 | -0,03 | 0,974159037 | 0,08  | 0,94930407  | 0,37  | 0,567607684 | 0,3   | 0,706246121 |
| Dhx29    | -0,33 | 0,61651614  | -0,47 | 0,323938334 | 0,15  | 0,911634383 | 0,6   | 0,207804372 | -0,11 | 0,910725246 |
| Dhx30    | -0,17 | 0,783200207 | -0,21 | 0,587454369 | 0,31  | 0,543291636 | -0,12 | 0,716709772 | -0,22 | 0,724153471 |
| Dhx32    | -0,12 | 0,862908528 | -0,12 | 0,769360279 | 0,79  | 0,160003543 | 1,26  | 0,076599442 | -0,03 | 0,978604922 |
| Dhx33    | -0,35 | 0,477363665 | -0,3  | 0,666285906 | 0,34  | 0,487127071 | 0,76  | 0,143673923 | -0,07 | 0,940878193 |
| Dhx34    | -0,36 | 0,360052826 | -0,06 | 0,944276524 | -0,04 | 0,978012085 | -0,21 | 0,706198355 | -0,25 | 0,72221917  |
| Dhx35    | 0     | 0,996998625 | 0,31  | 0,716661568 | 0,48  | 0,672766751 | 0,38  | 0,708430738 | 0,49  | 0,590396118 |
| Dhx36    | -0,73 | 0,146504462 | 0,1   | 0,840864779 | 0,26  | 0,602259493 | -0,1  | 0,91152705  | 0,04  | 0,97206128  |
| Dhx37    | -0,6  | 0,36631183  | -0,64 | 0,314697645 | 0,31  | 0,744387748 | 0,66  | 0,088827418 | -0,27 | 0,634076489 |
| Dhx38    | -0,38 | 0,473521576 | 0,22  | 0,608053892 | 0,77  | 0,18605319  | 0,52  | 0,134425757 | -0,11 | 0,894192218 |
| Dhx40    | 0,03  | 0,964124037 | -0,02 | 0,980518468 | 0,23  | 0,634936323 | 0,18  | 0,857884225 | 0,37  | 0,705726166 |
| Dhx57    | -0,06 | 0,937076069 | -0,09 | 0,897732014 | 0,79  | 0,28504607  | 0,31  | 0,438811787 | 0,02  | 0,980961333 |

|        |       |             |       |             |       |             |       |             |       |             |
|--------|-------|-------------|-------|-------------|-------|-------------|-------|-------------|-------|-------------|
| Dhx58  | 1,33  | 0,03843489  | 1     | 0,096469633 | -1,19 | 0,116663281 | -0,25 | 0,810891431 | 1,07  | 0,193796626 |
| Dhx8   | -0,1  | 0,899663752 | -0,52 | 0,322806958 | 0,41  | 0,473499244 | 0,3   | 0,604127556 | -0,15 | 0,879264989 |
| Dhx9   | -0,43 | 0,277463991 | -0,2  | 0,629493333 | 0,51  | 0,174007047 | 0,65  | 0,144438245 | 0,26  | 0,681597394 |
| Diablo | -0,03 | 0,966775766 | 0,28  | 0,745095842 | -0,18 | 0,747599709 | -0,43 | 0,444671197 | 0,06  | 0,951646452 |
| Diaph1 | -0,25 | 0,69656531  | 0,04  | 0,963662843 | -0,07 | 0,922807267 | -0,38 | 0,597350222 | -0,02 | 0,983613958 |
| Diaph2 | -0,09 | 0,901747703 | 0,17  | 0,758387553 | -0,17 | 0,792384474 | 1,11  | 0,102597032 | 0,39  | 0,657339897 |
| Diaph3 | -0,85 | 0,291870242 | -1,31 | 0,219055424 | 1,44  | 0,069458102 | 2,58  | 0,009035652 | 0,25  | 0,652022884 |
| Dicer1 | -0,42 | 0,487756981 | -0,05 | 0,975427696 | 0,24  | 0,807926482 | -0,47 | 0,419027572 | -0,4  | 0,499998316 |
| Dido1  | -0,02 | 0,981042688 | 0,01  | 0,992024201 | 0,41  | 0,38758276  | -0,09 | 0,810891431 | -0,19 | 0,757855068 |
| Diexf  | -1,47 | 0,079135571 | -0,52 | 0,717082896 | 0,27  | 0,776071062 | 0,33  | 0,673546458 | 0,2   | 0,90197982  |
| Dimt1  | -0,33 | 0,553849378 | -0,28 | 0,794646176 | 0,94  | 0,187379123 | -0,22 | 0,829591443 | 0,4   | 0,673577848 |
| Dio1   | 0,01  | 0,993810522 | 0,11  | 0,930192503 | -0,16 | 0,897932497 | 0,59  | 0,441112475 | 0,57  | 0,300866365 |
| Dio2   | 0,35  | 0,559636965 | -0,08 | 0,945241217 | -0,1  | 0,921817943 | 0,26  | 0,726463293 | 0,53  | 0,454305247 |
| Dio3   | 0,26  | 0,536947342 | -0,03 | 0,966717367 | 0,01  | 0,993686224 | 0,01  | 0,98186142  | -0,16 | 0,825861385 |
| Dio3os | 0,32  | 0,795659022 | 0,09  | 0,926157704 | -0,37 | 0,6410789   | -0,09 | 0,902657593 | 0,1   | 0,901174282 |
| Dip2a  | -0,12 | 0,882246744 | -0,19 | 0,698886888 | 0,28  | 0,807786405 | 0,64  | 0,174848313 | -0,12 | 0,906989203 |
| Dip2b  | -0,25 | 0,652819827 | -0,17 | 0,776548278 | -0,05 | 0,94665439  | -0,36 | 0,391807778 | -0,25 | 0,724669859 |
| Dip2c  | -0,49 | 0,630698959 | 0,09  | 0,880473303 | 0,06  | 0,963199274 | -0,47 | 0,247679503 | 0,04  | 0,96738578  |
| Diras1 | 0,24  | 0,684541418 | -0,31 | 0,726494244 | -0,41 | 0,389841181 | 0,23  | 0,54787739  | -0,14 | 0,840952901 |
| Diras2 | 0,06  | 0,930509569 | -0,05 | 0,943713379 | -0,36 | 0,691701606 | 0,08  | 0,845813504 | 0,12  | 0,869148467 |
| Dirc2  | -0,31 | 0,429961007 | -0,14 | 0,841184864 | 0,4   | 0,619594696 | -0,3  | 0,483390695 | -0,49 | 0,32673984  |
| Dis3   | -0,55 | 0,374743123 | -0,46 | 0,730536814 | 0,84  | 0,198968857 | 0,61  | 0,469017496 | 0,3   | 0,725587145 |
| Dis3l  | -0,2  | 0,766106295 | 0,02  | 0,990294709 | -0,14 | 0,938323709 | 0,2   | 0,868656077 | 0,16  | 0,912890826 |
| Dis3l2 | -0,38 | 0,262010777 | -0,1  | 0,948645482 | 0,01  | 0,994130625 | -0,44 | 0,581624426 | -0,28 | 0,636153935 |
| Disc1  | 0,35  | 0,706299381 | 0,19  | 0,843313499 | -0,11 | 0,862892093 | 0,28  | 0,513195999 | -0,06 | 0,948759136 |
| Disp1  | -0,72 | 0,218933879 | -0,01 | 0,997167971 | 0,82  | 0,319105917 | 0,16  | 0,825265029 | -0,84 | 0,244965154 |
| Disp2  | -0,03 | 0,966703421 | -0,02 | 0,994137877 | 0,49  | 0,604588937 | 2,31  | 0,018462689 | 0,38  | 0,666758661 |
| Dixdc1 | 0,28  | 0,627387895 | -0,32 | 0,805522187 | 0,02  | 0,986912078 | -0,13 | 0,883425466 | 0,35  | 0,650104155 |
| Dkc1   | -0,38 | 0,790694396 | -1,74 | 0,06498412  | 0,63  | 0,324321658 | 1,32  | 0,030664256 | -0,39 | 0,648593384 |
| Dkk1   | 0,19  | 0,76205049  | 0,21  | 0,792112243 | -0,08 | 0,934813979 | 0,09  | 0,908141892 | 0,21  | 0,865258929 |
| Dkk2   | -1,32 | 0,111767257 | -0,87 | 0,230051929 | 0,79  | 0,193368921 | -3,78 | 0,003561179 | -0,94 | 0,053907225 |
| Dkk3   | 0,02  | 0,979130815 | 0,01  | 0,991131565 | -0,17 | 0,837999835 | -0,35 | 0,327054708 | -0,05 | 0,952190189 |
| Dkk4   | -0,06 | 0,910211895 | 0,35  | 0,438549879 | 0,27  | 0,661089127 | -0,21 | 0,594488072 | -0,3  | 0,631872562 |
| Dkkl1  | -0,1  | 0,916074217 | 0,78  | 0,668839557 | 0,57  | 0,516728404 | -0,46 | 0,295171068 | 0,39  | 0,696378681 |
| Dlat   | -0,6  | 0,327697709 | -0,35 | 0,660058778 | 0,36  | 0,641366948 | 0,19  | 0,736117007 | 0,28  | 0,776907684 |

|         |       |             |       |             |       |             |       |             |       |             |
|---------|-------|-------------|-------|-------------|-------|-------------|-------|-------------|-------|-------------|
| Dlc1    | -0,14 | 0,862908528 | -0,16 | 0,818072947 | -0,06 | 0,943788892 | -0,28 | 0,738240486 | -0,43 | 0,629869282 |
| Dld     | -0,06 | 0,92812108  | -0,12 | 0,935041212 | 0,07  | 0,973789361 | 0,74  | 0,664161531 | 0,3   | 0,893358521 |
| Dlec1   | 0,52  | 0,305893528 | -0,28 | 0,709757852 | 0     | 0,999931921 | -0,22 | 0,696607541 | -0,12 | 0,87343011  |
| Dleu2   | 0,17  | 0,879088386 | 0,79  | 0,244905942 | -0,8  | 0,224747376 | -1,27 | 0,085666079 | 0,33  | 0,731527639 |
| Dleu7   | -0,1  | 0,841140165 | 0,35  | 0,508633526 | 0,13  | 0,922751355 | -0,67 | 0,60250696  | -0,13 | 0,944318268 |
| Dlg1    | -0,04 | 0,971465817 | -0,32 | 0,540905261 | -0,53 | 0,541560473 | -0,04 | 0,93808802  | 0,05  | 0,962820357 |
| Dlg2    | -0,16 | 0,78851504  | 0,02  | 0,98459889  | -0,33 | 0,462643491 | -0,12 | 0,854613369 | -0,19 | 0,820657685 |
| Dlg3    | -0,29 | 0,718996404 | -0,11 | 0,855607772 | -0,31 | 0,63276105  | -0,03 | 0,958172386 | 0,4   | 0,531168722 |
| Dlg4    | -0,15 | 0,817603984 | 0,37  | 0,619709049 | 0,12  | 0,876402129 | -0,48 | 0,329109694 | -0,08 | 0,939948423 |
| Dlg5    | -0,55 | 0,277154156 | -0,18 | 0,782652703 | 0,28  | 0,605402838 | 0,16  | 0,716994919 | -0,38 | 0,412253278 |
| Dlgap1  | -0,21 | 0,657723995 | -0,17 | 0,815708197 | -0,3  | 0,714346477 | 0,35  | 0,357560472 | -0,37 | 0,641928139 |
| Dlgap2  | 0,15  | 0,76826087  | -0,09 | 0,89081665  | 0,1   | 0,882072486 | 0,35  | 0,407310322 | -0,11 | 0,906338603 |
| Dlgap3  | -0,06 | 0,94918265  | 0     | 1           | 0,1   | 0,935978536 | 0,11  | 0,845966819 | -0,07 | 0,951544448 |
| Dlgap4  | 0,36  | 0,537459076 | 0,45  | 0,597396722 | -0,12 | 0,856046789 | 0,04  | 0,979829655 | 0,37  | 0,74495703  |
| Dlgap5  | -1,51 | 0,178589155 | -1,8  | 0,109267475 | 1,34  | 0,068656869 | 2,85  | 0,006048812 | -0,18 | 0,766559546 |
| Dlk1    | 0,11  | 0,911404262 | -0,22 | 0,88325516  | -0,1  | 0,902063109 | -1,04 | 0,19225115  | -0,94 | 0,266832581 |
| Dlk2    | -0,09 | 0,879514284 | -0,13 | 0,792112243 | -0,08 | 0,908428015 | 0,07  | 0,952615547 | -0,06 | 0,962820357 |
| Dll1    | -0,64 | 0,269151748 | -0,02 | 0,969019461 | 0,93  | 0,107458786 | -0,83 | 0,068101636 | -0,38 | 0,554975763 |
| Dll3    | -0,18 | 0,846344799 | 0,49  | 0,74245372  | 0,28  | 0,725191296 | -0,58 | 0,380438463 | -0,28 | 0,724153471 |
| Dll4    | -0,11 | 0,856079724 | 0,18  | 0,832194263 | -0,1  | 0,926974012 | 0,36  | 0,536344767 | -0,54 | 0,450543672 |
| Dlst    | -0,59 | 0,11435382  | -0,48 | 0,335724646 | -0,12 | 0,887630371 | 0,81  | 0,100873888 | -0,1  | 0,919325625 |
| Dlx1    | -0,16 | 0,866574136 | -0,46 | 0,712500402 | 0,09  | 0,931510936 | 0,29  | 0,758588473 | -0,26 | 0,771829552 |
| Dlx1as  | -0,06 | 0,902628825 | 0,12  | 0,890945229 | -0,25 | 0,638689491 | 0,11  | 0,804185549 | 0,11  | 0,864257719 |
| Dlx2    | -0,17 | 0,801386084 | 0,06  | 0,959209847 | 0,1   | 0,906602658 | 0,36  | 0,620676152 | 0,36  | 0,728827118 |
| Dlx3    | 0,3   | 0,606638547 | -0,09 | 0,926574484 | 0,44  | 0,500849254 | 0,04  | 0,968037302 | -0,46 | 0,351364129 |
| Dlx4    | 0,2   | 0,790497738 | 0,21  | 0,732847182 | 0,08  | 0,935854369 | -0,06 | 0,895809967 | 0,03  | 0,980961333 |
| Dlx4os  | -0,03 | 0,964272364 | -0,09 | 0,872911699 | -0,22 | 0,745313546 | -0,05 | 0,942313638 | 0     | 0,994821569 |
| Dlx5    | -0,31 | 0,713205475 | 0,17  | 0,82505545  | 0,02  | 0,983471086 | 0     | 1           | 0,14  | 0,916489445 |
| Dlx6    | 0,02  | 0,9719433   | -0,12 | 0,91395667  | -0,31 | 0,547368463 | 0,11  | 0,924110762 | 0     | 0,9969305   |
| Dlx6os1 | 0,04  | 0,947630317 | 0,04  | 0,945143056 | -0,19 | 0,665914215 | -0,12 | 0,768880868 | 0,17  | 0,815560342 |
| Dlx6os2 | 0,17  | 0,687694204 | -0,01 | 0,994735911 | -0,39 | 0,542398079 | 0     | 0,999809258 | -0,21 | 0,708051749 |
| Dmap1   | -0,12 | 0,900892804 | -0,57 | 0,716668427 | -0,25 | 0,729031049 | -0,19 | 0,77512999  | -0,31 | 0,726042963 |
| Dmbt1   | 0,4   | 0,738714467 | 0,41  | 0,664710351 | -0,01 | 0,995401448 | -0,26 | 0,675151978 | -0,34 | 0,647175712 |
| Dmbx1   | 0,33  | 0,647443044 | -0,32 | 0,644818618 | 0,06  | 0,963018377 | -0,05 | 0,943143586 | -0,22 | 0,741766428 |
| Dmc1    | -0,17 | 0,820023436 | 0,33  | 0,666450149 | -0,03 | 0,976042637 | -0,39 | 0,208693312 | 0,44  | 0,465936748 |



|          |       |             |       |             |       |             |       |             |       |             |
|----------|-------|-------------|-------|-------------|-------|-------------|-------|-------------|-------|-------------|
| Dmd      | 0,05  | 0,929634271 | 0,25  | 0,729194445 | 0,2   | 0,740220539 | -0,37 | 0,604127556 | -0,23 | 0,816729947 |
| Dmgdh    | 0,34  | 0,59710379  | -0,12 | 0,882589938 | 0,19  | 0,82162081  | -0,17 | 0,88307886  | -0,1  | 0,955910202 |
| Dmkn     | 0,43  | 0,546546904 | 0,09  | 0,936792848 | -0,15 | 0,90665     | 0,51  | 0,609540227 | 0,29  | 0,828610818 |
| Dmp1     | 0,01  | 0,994377387 | -0,46 | 0,747649252 | -0,03 | 0,969570532 | 0,85  | 0,159163116 | 0,13  | 0,890833196 |
| Dmpk     | 0,08  | 0,948926586 | -0,32 | 0,693906911 | 0,04  | 0,971303102 | -0,1  | 0,870547745 | -0,44 | 0,518538899 |
| Dmrt1    | 0,1   | 0,882374641 | 0,12  | 0,826509792 | -0,04 | 0,96858449  | 0,08  | 0,842789866 | 0,1   | 0,907903208 |
| Dmrt2    | -0,15 | 0,762791743 | 0,05  | 0,948771582 | -0,31 | 0,634936323 | 0,47  | 0,42507631  | -0,03 | 0,96738578  |
| Dmrt3    | 0,08  | 0,906075104 | -0,34 | 0,493525791 | 0,19  | 0,726539408 | 0,35  | 0,405337222 | -0,2  | 0,810276195 |
| Dmrta1   | 0,06  | 0,912674203 | 0,16  | 0,841184864 | -0,26 | 0,55495646  | 0,28  | 0,637125181 | 0,42  | 0,766559546 |
| Dmrta2   | 0,02  | 0,972112267 | 0,18  | 0,672585032 | -0,3  | 0,606696556 | -0,08 | 0,878757115 | 0,17  | 0,823098095 |
| Dmrta2os | 0,19  | 0,657723995 | 0,02  | 0,980518468 | 0,03  | 0,980423952 | 0,2   | 0,764855242 | 0,16  | 0,807816401 |
| Dmrtb1   | -0,05 | 0,957427783 | -0,04 | 0,943915456 | -0,24 | 0,787905724 | 0,58  | 0,138899159 | 0,13  | 0,864166878 |
| Dmrta1a  | -0,11 | 0,874467978 | 0,08  | 0,883373776 | 0,16  | 0,86935713  | -0,1  | 0,900250284 | -0,03 | 0,980961333 |
| Dmrta1b  | -0,68 | 0,402954668 | -0,08 | 0,972299902 | 0,09  | 0,948637233 | -0,01 | 0,99420889  | -0,11 | 0,94775051  |
| Dmrta2   | -0,01 | 0,996219097 | -0,03 | 0,972150454 | 0,03  | 0,983439952 | 0,05  | 0,960061698 | 0,37  | 0,671305308 |
| Dmtf1    | 0,32  | 0,403771843 | 0,13  | 0,874837295 | -0,31 | 0,746514932 | 0,59  | 0,465446267 | 0,7   | 0,359252386 |
| Dmtn     | -0,41 | 0,64776317  | -0,06 | 0,918041124 | -0,2  | 0,814956693 | -1,01 | 0,025391702 | -0,57 | 0,291856934 |
| Dmwd     | -0,27 | 0,596550801 | 0,08  | 0,880892852 | 0,15  | 0,821418477 | 0,41  | 0,357167871 | 0,05  | 0,959171847 |
| Dmxl1    | -0,07 | 0,932531737 | 0,23  | 0,577638608 | 0,04  | 0,966910505 | -0,34 | 0,733028982 | 0,57  | 0,566248044 |
| Dmxl2    | -1,04 | 0,242446083 | -0,48 | 0,729172466 | 0,65  | 0,534240899 | -0,98 | 0,188842869 | 0,21  | 0,845769651 |
| Dna2     | -0,46 | 0,423395139 | 0,05  | 0,958580194 | 0,2   | 0,727548313 | 0,37  | 0,461824013 | 0,12  | 0,879517285 |
| Dnaaf1   | -0,01 | 0,992748202 | -0,37 | 0,7091547   | 0,25  | 0,833890488 | 0,23  | 0,623678563 | -0,18 | 0,879788924 |
| Dnaaf2   | -0,21 | 0,728643996 | 0,14  | 0,852453028 | 0,53  | 0,32527167  | 0,23  | 0,599626473 | 0,51  | 0,362462346 |
| Dnaaf3   | 0,19  | 0,803557792 | 0,16  | 0,855632384 | -0,37 | 0,721952929 | 0,43  | 0,616640859 | 0,86  | 0,376276167 |
| Dnaaf5   | 0,04  | 0,94916801  | -0,09 | 0,904193329 | 0,23  | 0,720603806 | 0,12  | 0,849190278 | -0,45 | 0,4940585   |
| Dnah1    | -0,21 | 0,722415783 | -0,19 | 0,793509146 | -0,59 | 0,311256331 | 0,23  | 0,716994919 | 0,17  | 0,823098095 |
| Dnah10   | -0,16 | 0,816710776 | 0,25  | 0,49941722  | -0,01 | 0,993379272 | -0,86 | 0,050512846 | -0,02 | 0,981079016 |
| Dnah11   | -0,14 | 0,824390658 | 0,17  | 0,737997126 | -0,12 | 0,868590766 | 0,04  | 0,947477693 | 0,03  | 0,979392852 |
| Dnah12   | -0,22 | 0,796840392 | 0,35  | 0,855632384 | 0,22  | 0,773793654 | -0,34 | 0,810172317 | -0,01 | 0,993865559 |
| Dnah14   | -0,81 | 0,375111414 | 0,22  | 0,732847182 | -0,16 | 0,901816517 | -0,09 | 0,911258809 | 0,18  | 0,899597352 |
| Dnah17   | -0,1  | 0,887555241 | -0,27 | 0,703923817 | -0,03 | 0,975705913 | -0,06 | 0,943143586 | 0,08  | 0,939948423 |
| Dnah2    | -0,14 | 0,805438081 | 0,14  | 0,763796207 | 0,18  | 0,741623367 | -0,46 | 0,276093686 | -0,02 | 0,979456872 |
| Dnah2os  | 0,69  | 0,092891216 | 0,74  | 0,106620181 | -0,67 | 0,267663626 | 0,47  | 0,202042321 | 0,23  | 0,708895088 |
| Dnah3    | 0,1   | 0,892124736 | 0,67  | 0,574304911 | -0,35 | 0,686625108 | -0,44 | 0,396250826 | 0,08  | 0,930041752 |
| Dnah5    | 0,22  | 0,685823963 | -0,14 | 0,816554499 | 0,09  | 0,898659686 | -0,04 | 0,962043341 | -0,22 | 0,745574572 |

|         |       |             |       |             |       |             |       |             |       |             |
|---------|-------|-------------|-------|-------------|-------|-------------|-------|-------------|-------|-------------|
| Dnah6   | -0,21 | 0,714793039 | -0,14 | 0,894174458 | -0,45 | 0,345313881 | 0,41  | 0,25955285  | -0,32 | 0,541137006 |
| Dnah7a  | 0,14  | 0,774127883 | -0,25 | 0,735554037 | 0,44  | 0,550662565 | 0,98  | 0,077266344 | 0,6   | 0,508032539 |
| Dnah7b  | 0,02  | 0,984967814 | -0,21 | 0,700464647 | -0,61 | 0,506222058 | 0,33  | 0,62631082  | 0,54  | 0,583952152 |
| Dnah7c  | -0,09 | 0,897717279 | -0,17 | 0,735852142 | -0,33 | 0,543291636 | -0,01 | 0,994279933 | -0,11 | 0,874554354 |
| Dnah8   | -0,45 | 0,398157125 | -0,14 | 0,810875398 | -0,02 | 0,982305856 | 1,35  | 0,029813704 | 0,19  | 0,824727805 |
| Dnah9   | 0,12  | 0,832513798 | 0,07  | 0,949561659 | -0,14 | 0,820608584 | -0,38 | 0,299499224 | -0,07 | 0,933667736 |
| Dnaic1  | -0,03 | 0,971922167 | 0,14  | 0,865248202 | -0,09 | 0,923350407 | -0,29 | 0,586887461 | -0,14 | 0,864540232 |
| Dnaic2  | 0,01  | 0,991919022 | -0,01 | 0,996259587 | 0,03  | 0,977126842 | 0,01  | 0,993757224 | 0,1   | 0,89630096  |
| Dnaja1  | 0,14  | 0,778869381 | 0,41  | 0,306324212 | -0,48 | 0,371125662 | -1,15 | 0,033579739 | 0,71  | 0,143610682 |
| Dnaja2  | 0,09  | 0,897747251 | 0,1   | 0,866844066 | -0,07 | 0,923396625 | 0,5   | 0,120568928 | 0,6   | 0,171989528 |
| Dnaja3  | -0,57 | 0,40477934  | -0,17 | 0,897574732 | 0,95  | 0,30644042  | -0,18 | 0,869497105 | -0,18 | 0,859185944 |
| Dnaja4  | -0,28 | 0,74672311  | 0,16  | 0,85154774  | -0,49 | 0,420043356 | -0,47 | 0,447905925 | 0,55  | 0,378150627 |
| Dnajb1  | -0,21 | 0,819634768 | 0,62  | 0,145709196 | -0,11 | 0,917694073 | -1,45 | 0,018915917 | 0,16  | 0,855741842 |
| Dnajb11 | -0,11 | 0,850491134 | 0,03  | 0,976406273 | 0,2   | 0,798605244 | 0,2   | 0,646776742 | 0,14  | 0,889106241 |
| Dnajb12 | -0,13 | 0,810101389 | -0,1  | 0,85597055  | 0,32  | 0,681398968 | 0,2   | 0,757176349 | 0,01  | 0,992370267 |
| Dnajb13 | 0,24  | 0,776006017 | 0,03  | 0,974580396 | 0,2   | 0,742757109 | -0,06 | 0,938950727 | -0,07 | 0,948080686 |
| Dnajb14 | -0,48 | 0,272587269 | -0,1  | 0,912137323 | 0,11  | 0,935945983 | -0,29 | 0,596439563 | -0,6  | 0,214123599 |
| Dnajb2  | -0,11 | 0,864526424 | -0,04 | 0,949526533 | -0,22 | 0,730738549 | -0,12 | 0,896599656 | 0,29  | 0,765342998 |
| Dnajb3  | -0,29 | 0,629541289 | 0,59  | 0,454735704 | -0,92 | 0,235612389 | -0,79 | 0,204405333 | -0,25 | 0,827032122 |
| Dnajb4  | -0,81 | 0,196537415 | 0,39  | 0,697939485 | -0,52 | 0,565822909 | -1,1  | 0,10920153  | 0,13  | 0,907634098 |
| Dnajb5  | 0,08  | 0,931964207 | 0,33  | 0,526101975 | 0,17  | 0,823823322 | -0,44 | 0,545758277 | -0,3  | 0,77848427  |
| Dnajb6  | 0,36  | 0,33868538  | 0,24  | 0,619501651 | -0,44 | 0,56948206  | -0,04 | 0,947167456 | 0,18  | 0,78960943  |
| Dnajb7  | -0,21 | 0,571404655 | -0,11 | 0,894022563 | -0,22 | 0,635864143 | -0,26 | 0,5090515   | -0,18 | 0,820234867 |
| Dnajb8  | -0,29 | 0,645041159 | 0     | 0,997700959 | 0,02  | 0,987390039 | 0     | 1           | -0,06 | 0,948163009 |
| Dnajb9  | 0,26  | 0,489112201 | 0,07  | 0,884434898 | -0,2  | 0,789799931 | -0,89 | 0,056433439 | 0,05  | 0,952206434 |
| Dnajc1  | -0,07 | 0,946792769 | 0,05  | 0,936792848 | 0,32  | 0,488112233 | 0,08  | 0,868829975 | 0,24  | 0,677838252 |
| Dnajc10 | -0,33 | 0,661945783 | -0,34 | 0,669154864 | 1,54  | 0,124912754 | 0,44  | 0,585277734 | 0,21  | 0,840952901 |
| Dnajc11 | 0,06  | 0,947630317 | 0,01  | 0,994137877 | 0,52  | 0,260217755 | 0,32  | 0,676740124 | 0,12  | 0,918865935 |
| Dnajc12 | 0,35  | 0,632053719 | -0,22 | 0,815791007 | -0,02 | 0,991451381 | -1,13 | 0,119127648 | -0,79 | 0,328082125 |
| Dnajc13 | -0,04 | 0,950532575 | 0,12  | 0,837500541 | 0,36  | 0,465463155 | 1,12  | 0,038121171 | 0,49  | 0,355561977 |
| Dnajc14 | 0,08  | 0,884369316 | -0,01 | 0,994390365 | 0,73  | 0,452731181 | 0,08  | 0,905568716 | -0,03 | 0,979456872 |
| Dnajc15 | 0,18  | 0,7471174   | -0,5  | 0,269454176 | 0,09  | 0,907951869 | 0,59  | 0,247845465 | 0,21  | 0,734725045 |
| Dnajc16 | -0,25 | 0,713856222 | 0,44  | 0,377007015 | -0,06 | 0,977827235 | -0,07 | 0,902632056 | -0,07 | 0,953971867 |
| Dnajc17 | -0,26 | 0,69184055  | -0,37 | 0,666450149 | 0,18  | 0,911634383 | -0,06 | 0,95852873  | -0,4  | 0,628728585 |
| Dnajc18 | -0,34 | 0,470166881 | -0,32 | 0,489766492 | 0,9   | 0,246580815 | 0,83  | 0,144210353 | -0,39 | 0,602231893 |

|          |       |             |       |             |       |             |       |             |       |             |
|----------|-------|-------------|-------|-------------|-------|-------------|-------|-------------|-------|-------------|
| Dnajc19  | -0,57 | 0,353022744 | 0,63  | 0,507054817 | -0,81 | 0,64743984  | -1,62 | 0,108083426 | 0,34  | 0,807725933 |
| Dnajc2   | -0,38 | 0,49834954  | -0,15 | 0,816554499 | 0,22  | 0,777417583 | 0,6   | 0,274415093 | 0,02  | 0,987913292 |
| Dnajc21  | 0,4   | 0,314465089 | 0,07  | 0,912535732 | -0,18 | 0,842919139 | 0,19  | 0,733028982 | 0,6   | 0,389664866 |
| Dnajc22  | 0     | 0,999732664 | -0,15 | 0,801787438 | 0,8   | 0,273327632 | 0,08  | 0,90213506  | -0,39 | 0,665051452 |
| Dnajc24  | -0,06 | 0,963378584 | -0,65 | 0,475024915 | -0,28 | 0,78634406  | 0,32  | 0,68709897  | 0,1   | 0,937593816 |
| Dnajc25  | -0,3  | 0,514163426 | -0,75 | 0,213731156 | 0,26  | 0,772397144 | 0,91  | 0,24925385  | -0,14 | 0,918465043 |
| Dnajc27  | -0,8  | 0,465168175 | -0,47 | 0,526101975 | 0,19  | 0,862869965 | 0,33  | 0,718553452 | -0,28 | 0,89104084  |
| Dnajc28  | -0,03 | 0,975506993 | -0,01 | 0,993068441 | 0,15  | 0,841563482 | -0,1  | 0,932268668 | -0,37 | 0,791071778 |
| Dnajc3   | -0,01 | 0,991216662 | -0,13 | 0,780049389 | -0,17 | 0,78168172  | -0,14 | 0,681233185 | -0,01 | 0,991437885 |
| Dnajc30  | 0,15  | 0,805438081 | -0,04 | 0,933320126 | 0,03  | 0,982648972 | 0,12  | 0,807859739 | -0,07 | 0,949544475 |
| Dnajc4   | 0,14  | 0,740529913 | -0,28 | 0,756778611 | -0,11 | 0,841563482 | -0,3  | 0,448670175 | -0,24 | 0,666758661 |
| Dnajc5   | -0,04 | 0,945762129 | 0,07  | 0,9369583   | 0,2   | 0,840148544 | 0,37  | 0,255370924 | -0,06 | 0,940878193 |
| Dnajc5b  | -0,07 | 0,928001641 | -0,25 | 0,825162812 | -0,59 | 0,174607192 | 0,09  | 0,910298592 | -0,52 | 0,275090914 |
| Dnajc5g  | 0,18  | 0,809583841 | 0,09  | 0,900801202 | -0,17 | 0,729446768 | 0,09  | 0,877717342 | 0,16  | 0,827032122 |
| Dnajc6   | -0,43 | 0,302609278 | -0,25 | 0,844839484 | -0,17 | 0,907580464 | 0,47  | 0,601688484 | 0,08  | 0,960313057 |
| Dnajc7   | 0,04  | 0,949297999 | 0,11  | 0,882931058 | 0,3   | 0,665034403 | -0,31 | 0,366547936 | 0,1   | 0,885986069 |
| Dnajc8   | -0,18 | 0,741182094 | -0,22 | 0,722523151 | 0,22  | 0,680127367 | 0,06  | 0,92289757  | 0,04  | 0,958259949 |
| Dnajc9   | -0,44 | 0,469733058 | -1,06 | 0,30567226  | 0,25  | 0,794567505 | -0,09 | 0,922740736 | -0,35 | 0,675282484 |
| Dnal1    | -0,48 | 0,206370928 | -0,32 | 0,807674009 | 0,38  | 0,719386001 | 0,39  | 0,420393348 | -0,12 | 0,909550161 |
| Dnal4    | -0,34 | 0,626822535 | -0,4  | 0,823246376 | 0,12  | 0,92422034  | 0,29  | 0,811412241 | -0,25 | 0,829584311 |
| Dnali1   | -0,3  | 0,744352714 | 0,1   | 0,820802586 | 0,04  | 0,968677508 | -0,01 | 0,992906132 | -0,02 | 0,980961333 |
| Dnase1   | 0,02  | 0,98456417  | -0,03 | 0,975864019 | 0,04  | 0,968330792 | -0,68 | 0,253467469 | 0,3   | 0,694233384 |
| Dnase11  | 0,16  | 0,818587047 | 0,02  | 0,987282412 | 1,26  | 0,158695441 | -1,44 | 0,041977017 | -0,57 | 0,3397798   |
| Dnase112 | -0,22 | 0,795936199 | -0,31 | 0,718769238 | -0,31 | 0,720728089 | -0,19 | 0,724738045 | -0,15 | 0,871038748 |
| Dnase113 | -0,38 | 0,81064821  | 0,29  | 0,788059863 | 0,55  | 0,229067599 | 0,22  | 0,831289571 | 0,12  | 0,969617491 |
| Dnase2a  | -0,61 | 0,231812139 | 0,58  | 0,518494408 | 0,79  | 0,369527192 | -1,41 | 0,01323279  | -0,63 | 0,368554903 |
| Dnase2b  | 0,13  | 0,869751287 | 0,13  | 0,772977288 | -0,11 | 0,903468504 | 0,53  | 0,650385638 | 0,16  | 0,920748161 |
| Dnd1     | 0,09  | 0,882500171 | -0,27 | 0,582502577 | 0,54  | 0,475944471 | 0,33  | 0,522894482 | 0,09  | 0,947300798 |
| Dner     | -0,14 | 0,821096279 | 0,1   | 0,927367017 | -0,45 | 0,260200895 | 0,03  | 0,967050017 | 0,07  | 0,948494058 |
| Dnhd1    | 0,72  | 0,153824107 | 0,22  | 0,645950583 | -0,88 | 0,425782502 | 0,11  | 0,884352208 | 0,72  | 0,217820134 |
| Dnlz     | 0,1   | 0,886741208 | -0,25 | 0,732044571 | -0,44 | 0,622546805 | 0,07  | 0,889515057 | -0,01 | 0,992370267 |
| Dnm1     | -0,28 | 0,623941869 | -0,04 | 0,970020205 | 0,41  | 0,662451176 | -0,88 | 0,162281276 | 0,05  | 0,974595412 |
| Dnm11    | -0,18 | 0,712165686 | -0,13 | 0,889431157 | 0,14  | 0,859411859 | -0,04 | 0,969311675 | -0,09 | 0,93992804  |
| Dnm2     | -0,37 | 0,33868538  | -0,3  | 0,579053234 | -0,07 | 0,950725218 | -0,26 | 0,666557102 | -0,48 | 0,431894609 |
| Dnm3     | 0,22  | 0,762308711 | 0,48  | 0,371450754 | -0,82 | 0,274899716 | -2,35 | 0,006689209 | 0,01  | 0,990633766 |

|          |       |             |       |             |       |             |       |             |       |             |
|----------|-------|-------------|-------|-------------|-------|-------------|-------|-------------|-------|-------------|
| Dnm3os   | -0,17 | 0,848780666 | 0,42  | 0,666450149 | 0,07  | 0,929042102 | 0,82  | 0,078332465 | 0,05  | 0,967807075 |
| Dnmbp    | -0,24 | 0,616144081 | 0,02  | 0,990088847 | 0,58  | 0,472574346 | -0,2  | 0,713440433 | -0,34 | 0,679432447 |
| Dnmt1    | -0,6  | 0,154960518 | -1,35 | 0,110541472 | 0,55  | 0,491256345 | 1,2   | 0,05133893  | -0,06 | 0,952296554 |
| Dnmt3a   | -0,95 | 0,048513596 | -0,14 | 0,86297915  | 0,4   | 0,659677885 | -0,65 | 0,15935962  | -0,3  | 0,734575767 |
| Dnmt3aos | 0,05  | 0,9231839   | -0,08 | 0,87189957  | 0,12  | 0,844258774 | 0,16  | 0,771144265 | 0,07  | 0,936841734 |
| Dnmt3b   | -0,73 | 0,244269955 | -0,16 | 0,828137336 | 0,26  | 0,834042944 | -0,99 | 0,129101197 | -0,27 | 0,792404969 |
| Dnmt3bos | -0,04 | 0,94756262  | 0,04  | 0,949251792 | -0,07 | 0,927978381 | 0,04  | 0,928002892 | 0,05  | 0,952296554 |
| Dnmt3l   | -0,03 | 0,963378584 | 0,08  | 0,938711163 | 0,37  | 0,376588922 | -0,05 | 0,942182477 | 0,01  | 0,992370267 |
| Dnpep    | -0,03 | 0,953675344 | 0,05  | 0,934037853 | -0,06 | 0,937802036 | 0,03  | 0,97320925  | -0,08 | 0,93732195  |
| Dnph1    | -0,01 | 0,998017023 | -0,86 | 0,420739829 | 0,71  | 0,374422909 | 1,1   | 0,038935822 | 0,04  | 0,971975122 |
| Dntt     | -0,02 | 0,976574175 | -0,41 | 0,695823136 | -0,14 | 0,820614211 | 0,35  | 0,526051835 | 0,37  | 0,465002838 |
| Dnttip1  | -0,03 | 0,962660554 | 0,05  | 0,945374636 | 0,56  | 0,2967399   | -0,12 | 0,87811903  | -0,1  | 0,918288793 |
| Dnttip2  | -0,22 | 0,724502628 | 0,09  | 0,92006016  | 0,27  | 0,743001036 | -0,24 | 0,628879523 | 0,09  | 0,932268703 |
| Doc2a    | -0,03 | 0,972139799 | -0,17 | 0,709432782 | -0,3  | 0,613380041 | 0,17  | 0,853578956 | 0,01  | 0,991977803 |
| Doc2b    | -0,36 | 0,551325356 | -0,58 | 0,554897489 | 0,03  | 0,970939073 | -0,39 | 0,217432811 | -0,55 | 0,268295085 |
| Doc2g    | 0,33  | 0,619738681 | 0,24  | 0,718165046 | -0,21 | 0,721369858 | -0,08 | 0,884352208 | -0,44 | 0,419557334 |
| Dock1    | -0,24 | 0,70841898  | -0,14 | 0,739605822 | 0,2   | 0,775290551 | -0,07 | 0,87148686  | -0,24 | 0,642726581 |
| Dock10   | -0,3  | 0,817356919 | 0,45  | 0,530207532 | 0,13  | 0,940464217 | -1,3  | 0,080547108 | -0,1  | 0,94250983  |
| Dock11   | -0,26 | 0,763907846 | 1,02  | 0,212383403 | 0,68  | 0,314111609 | -1,63 | 0,103970767 | 0,19  | 0,903241997 |
| Dock2    | 0,25  | 0,783200207 | 0,33  | 0,702804107 | -0,36 | 0,79692015  | -0,68 | 0,443238713 | 0,5   | 0,706960107 |
| Dock3    | 0,44  | 0,321600657 | 0,19  | 0,756778611 | -0,07 | 0,922807267 | 0,1   | 0,895383945 | 0,2   | 0,77684009  |
| Dock4    | 0,11  | 0,792735264 | 0,21  | 0,700297886 | -0,18 | 0,845993227 | 0,2   | 0,640449047 | -0,01 | 0,989665382 |
| Dock5    | -0,44 | 0,38838066  | -0,19 | 0,765705056 | 0,48  | 0,386648382 | 1,01  | 0,306414254 | -0,41 | 0,728578071 |
| Dock6    | -0,33 | 0,455001921 | -0,31 | 0,500669815 | 0,09  | 0,934486236 | -0,55 | 0,134154088 | -0,87 | 0,056563384 |
| Dock7    | -0,61 | 0,68194299  | 0,77  | 0,693906911 | 0,64  | 0,344676655 | -2,18 | 0,007919254 | -0,24 | 0,712121015 |
| Dock8    | -0,56 | 0,149941264 | -0,09 | 0,900801202 | 0,72  | 0,097897304 | 1,14  | 0,026951225 | -0,5  | 0,524708288 |
| Dock9    | 0,23  | 0,586970138 | -0,22 | 0,582502577 | -0,33 | 0,500343254 | 0,07  | 0,896599656 | -0,24 | 0,738260196 |
| Dohh     | -0,5  | 0,451211285 | -0,51 | 0,362584617 | 0,82  | 0,374422909 | 0,7   | 0,522511755 | 0,57  | 0,63362558  |
| Dok1     | -0,21 | 0,71176205  | 1,14  | 0,288456022 | 0,14  | 0,940335002 | 0,1   | 0,917426171 | -0,17 | 0,907121694 |
| Dok2     | 0,17  | 0,822613889 | 0     | 1           | -0,3  | 0,823890116 | 0,14  | 0,932800758 | -0,01 | 0,994774512 |
| Dok3     | 0,15  | 0,757032046 | 0,31  | 0,472042875 | -0,1  | 0,885263358 | 0,24  | 0,603611964 | 0,4   | 0,66875229  |
| Dok4     | -0,77 | 0,244269955 | -0,24 | 0,674396659 | 0,22  | 0,914134206 | -1,21 | 0,072914823 | -0,06 | 0,960610384 |
| Dok5     | -0,66 | 0,244464172 | -0,27 | 0,534352648 | 0,03  | 0,987584135 | 0,33  | 0,299696716 | 0,11  | 0,891925115 |
| Dok6     | -0,27 | 0,601664468 | -0,03 | 0,985291538 | -0,65 | 0,150922892 | -0,01 | 0,986364743 | -0,02 | 0,988084587 |
| Dok7     | -0,19 | 0,846447446 | 0,14  | 0,740618526 | 0,1   | 0,928438649 | -0,16 | 0,806984706 | 0,05  | 0,963675274 |

|        |       |             |       |             |       |             |       |             |       |             |
|--------|-------|-------------|-------|-------------|-------|-------------|-------|-------------|-------|-------------|
| Dolk   | -0,23 | 0,737156332 | 0,21  | 0,802528523 | -0,03 | 0,985977985 | -0,24 | 0,654230107 | 0,05  | 0,958113093 |
| Dolpp1 | -0,34 | 0,773823304 | -0,05 | 0,958545812 | -0,38 | 0,743653977 | 0,55  | 0,36184569  | 0,06  | 0,962872595 |
| Donson | 0,71  | 0,498560785 | 0,28  | 0,748874675 | 1,18  | 0,226784152 | -0,22 | 0,685871999 | 0,14  | 0,866285506 |
| Dopey1 | -0,37 | 0,582214344 | -0,02 | 0,984812702 | -0,65 | 0,404699128 | -0,93 | 0,073376873 | -0,18 | 0,801274921 |
| Dopey2 | 0,01  | 0,992748202 | 0,22  | 0,785128233 | -0,35 | 0,432229079 | -0,68 | 0,161809117 | -0,29 | 0,62559702  |
| Dot11  | 0,11  | 0,898572877 | -0,01 | 0,993789602 | 0,52  | 0,359756591 | 1,47  | 0,064119729 | 0,22  | 0,861763071 |
| Doxl2  | 0,36  | 0,421438021 | 0,18  | 0,808222386 | -0,19 | 0,82000536  | -0,39 | 0,42974908  | -0,14 | 0,885872093 |
| Dpagt1 | -0,45 | 0,268001582 | -0,24 | 0,70840705  | 0,39  | 0,613433145 | 0,19  | 0,659707323 | -0,57 | 0,352006036 |
| Dpcd   | -0,29 | 0,538001428 | -0,18 | 0,826265098 | 0,26  | 0,760992151 | 1,08  | 0,021262879 | 0,07  | 0,936240111 |
| Dpcr1  | 0,19  | 0,678433901 | -0,11 | 0,809683705 | 0     | 0,999931921 | 0,38  | 0,494062739 | 0,03  | 0,969617491 |
| Dpep1  | -0,1  | 0,916275746 | 0,01  | 0,997289115 | -0,1  | 0,929871006 | -0,76 | 0,414522125 | -0,67 | 0,426833655 |
| Dpep2  | 0,64  | 0,376820093 | 0,25  | 0,756555599 | 0,37  | 0,616965903 | -0,1  | 0,908141892 | 0,21  | 0,840952901 |
| Dpep3  | -0,2  | 0,766898048 | 0,21  | 0,595287483 | 0,1   | 0,88539334  | -0,19 | 0,604954888 | 0,34  | 0,487064794 |
| Dpf1   | 0,29  | 0,762765215 | -0,58 | 0,411125721 | 0,18  | 0,929871006 | 0,52  | 0,394279742 | 0,04  | 0,969117862 |
| Dpf2   | -0,05 | 0,922591969 | 0     | 1           | 0,19  | 0,83480907  | -0,39 | 0,254784646 | -0,14 | 0,823098095 |
| Dpf3   | -0,51 | 0,659860831 | 0,32  | 0,793642574 | 0,08  | 0,953484852 | -0,49 | 0,548057593 | 0,36  | 0,840952901 |
| Dph1   | -1    | 0,077012562 | -0,1  | 0,966717367 | -0,12 | 0,940550094 | 0,06  | 0,953384713 | -0,39 | 0,572463557 |
| Dph2   | -0,35 | 0,738448626 | -0,33 | 0,527716421 | -0,13 | 0,841669036 | 0,33  | 0,46528068  | -0,38 | 0,553642892 |
| Dph3   | -0,11 | 0,820785667 | -0,28 | 0,676903594 | -0,2  | 0,730066852 | 0,03  | 0,970931237 | 0,06  | 0,952296554 |
| Dph5   | -0,04 | 0,95290436  | 0,08  | 0,928134372 | -0,21 | 0,773401208 | 1,57  | 0,01888325  | 0,44  | 0,51509981  |
| Dph6   | -0,12 | 0,829889828 | 0,19  | 0,673542391 | -0,54 | 0,353512094 | -0,42 | 0,220928251 | 0,03  | 0,97757951  |
| Dph7   | -0,25 | 0,811525368 | -0,44 | 0,800176188 | 0,07  | 0,974887915 | -0,37 | 0,799835488 | 0,15  | 0,925858284 |
| Dpm1   | 0     | 0,999288019 | 0     | 0,998929981 | -0,27 | 0,695272769 | -0,01 | 0,986768223 | 0,37  | 0,502476949 |
| Dpm2   | 0,19  | 0,764824121 | 0,16  | 0,785521672 | 1,03  | 0,408971158 | -0,23 | 0,620318886 | -0,17 | 0,807725933 |
| Dpm3   | 0,15  | 0,769138738 | -0,23 | 0,635374994 | 0,29  | 0,634936323 | -0,27 | 0,449932456 | -0,13 | 0,836697963 |
| Dpp10  | 0,27  | 0,68179858  | 0,07  | 0,956555856 | -0,7  | 0,260479447 | -0,4  | 0,441431023 | -0,32 | 0,696249488 |
| Dpp3   | -0,51 | 0,287459734 | -0,03 | 0,959837002 | 0,35  | 0,618753906 | 0,66  | 0,109015933 | -0,19 | 0,779912857 |
| Dpp4   | 0,32  | 0,598597881 | 0,61  | 0,598307698 | -0,2  | 0,747950844 | -0,59 | 0,236394092 | 0,24  | 0,876418697 |
| Dpp6   | 0,03  | 0,972701787 | -0,3  | 0,790100113 | -0,41 | 0,383850264 | 0,52  | 0,523281191 | -0,12 | 0,913274952 |
| Dpp7   | 0,26  | 0,737887307 | -0,02 | 0,990380046 | -0,04 | 0,982759458 | -0,82 | 0,093785342 | 0,12  | 0,873997452 |
| Dpp8   | -0,35 | 0,46271144  | -0,18 | 0,680709276 | 0,57  | 0,329525512 | -0,11 | 0,84956075  | -0,33 | 0,594109073 |
| Dpp9   | -0,29 | 0,557114011 | -0,19 | 0,726204935 | -0,07 | 0,939953717 | 0,42  | 0,274415093 | -0,09 | 0,904636459 |
| Dppa1  | -0,25 | 0,728516314 | -0,19 | 0,875417594 | -0,11 | 0,911860447 | 0,6   | 0,411913475 | 0,31  | 0,707962968 |
| Dppa2  | 0,08  | 0,926316023 | -0,38 | 0,65864372  | 0,02  | 0,980782667 | 0,27  | 0,464815834 | 0,2   | 0,817910544 |
| Dppa3  | 0,13  | 0,855421712 | 0,22  | 0,887880825 | -0,01 | 0,994130625 | -0,37 | 0,406029112 | -0,52 | 0,434997258 |

|          |       |             |       |             |       |             |       |             |       |             |
|----------|-------|-------------|-------|-------------|-------|-------------|-------|-------------|-------|-------------|
| Dppa4    | 0,54  | 0,507090099 | -0,19 | 0,807175471 | 0,19  | 0,777417583 | 0     | 1           | 0,1   | 0,886693819 |
| Dppa5a   | 0,08  | 0,859931756 | 0,18  | 0,750273889 | -0,34 | 0,537547784 | 0,25  | 0,567919709 | 0,35  | 0,518022769 |
| Dpt      | -0,28 | 0,867243066 | -0,38 | 0,74245372  | 0,32  | 0,907130828 | 1,16  | 0,182595927 | 0,29  | 0,599242422 |
| Dpy1911  | -0,34 | 0,736858836 | -0,17 | 0,703041962 | 0,4   | 0,534844467 | 0,15  | 0,918795752 | -0,38 | 0,757428993 |
| Dpy1912  | -0,19 | 0,80309313  | 0,04  | 0,974580396 | 0,25  | 0,789802954 | 0,14  | 0,859968739 | 0,05  | 0,970571301 |
| Dpy1913  | -0,4  | 0,713856222 | 0,38  | 0,852719676 | -0,21 | 0,734556263 | -1,02 | 0,461824013 | 0,27  | 0,902638028 |
| Dpy1914  | -0,32 | 0,723617184 | -0,3  | 0,803870841 | 0,04  | 0,96043738  | -0,39 | 0,664421412 | -0,17 | 0,856029945 |
| Dpy30    | -0,41 | 0,578748992 | -0,02 | 0,990272104 | 0,74  | 0,189230724 | 0,09  | 0,896599656 | 0,39  | 0,66875229  |
| Dpyd     | 0     | 0,999288019 | -0,38 | 0,801609076 | -0,41 | 0,657150555 | 0,16  | 0,87630843  | -0,14 | 0,92519473  |
| Dpys     | 0,17  | 0,841140165 | -0,09 | 0,948409105 | -0,21 | 0,780019254 | -0,29 | 0,697069532 | 0,22  | 0,830813323 |
| Dpysl2   | -0,89 | 0,059828377 | -0,85 | 0,094438943 | 0,32  | 0,57717258  | 0,15  | 0,805169421 | -1,02 | 0,067209311 |
| Dpysl3   | -0,62 | 0,140363242 | -0,26 | 0,495742596 | 0,24  | 0,833747652 | 2,69  | 0,005276771 | 0,28  | 0,738260196 |
| Dpysl4   | 0,05  | 0,936014404 | -0,18 | 0,789363581 | 0,15  | 0,826241249 | 0,33  | 0,555493219 | 0,22  | 0,764656525 |
| Dpysl5   | 0,18  | 0,765328991 | -0,31 | 0,690317074 | -0,11 | 0,909233941 | 0,38  | 0,357869114 | 0,2   | 0,742614391 |
| DQ267101 | -0,1  | 0,876019664 | -0,1  | 0,839789639 | -0,2  | 0,76994964  | -0,05 | 0,911302302 | 0,07  | 0,925996824 |
| DQ267102 | 0,06  | 0,972112267 | 0,03  | 0,976406273 | 0,18  | 0,811424918 | -0,14 | 0,783119247 | -0,12 | 0,86809582  |
| Dqx1     | 0,51  | 0,370100167 | 0,67  | 0,582502577 | 0,02  | 0,992362085 | -0,05 | 0,96875256  | 0,52  | 0,544355542 |
| Dr1      | -0,13 | 0,857300555 | 0,05  | 0,940301464 | 0,65  | 0,293063011 | 0,89  | 0,658281831 | 1,03  | 0,600537288 |
| Dram1    | 0,33  | 0,559760851 | 0,56  | 0,49252156  | -0,14 | 0,963221639 | -2,25 | 0,014533894 | 0,66  | 0,381567482 |
| Dram2    | 0,12  | 0,865689677 | 0,1   | 0,830463806 | -0,13 | 0,864598204 | -0,63 | 0,230711382 | 0,08  | 0,935812103 |
| Drap1    | -0,28 | 0,464531121 | -0,14 | 0,765325717 | 0,11  | 0,896335027 | -0,04 | 0,943143586 | -0,15 | 0,820234867 |
| Draxin   | 0,43  | 0,59710379  | 0,63  | 0,544440118 | -0,2  | 0,848089506 | -0,69 | 0,25955285  | -0,28 | 0,762656141 |
| Drc1     | 0,04  | 0,958188047 | -0,06 | 0,955475499 | 0,11  | 0,887947732 | 0,56  | 0,369703995 | 0,38  | 0,600537288 |
| Drc7     | 0,13  | 0,829838991 | 0,58  | 0,325242663 | 0,01  | 0,992606832 | -0,45 | 0,590307186 | -0,23 | 0,836061657 |
| Drd1     | -0,2  | 0,795286609 | -0,7  | 0,2862434   | -0,52 | 0,302861841 | 0,2   | 0,742706747 | -0,52 | 0,46391899  |
| Drd2     | 0,16  | 0,816922106 | -0,68 | 0,26375548  | 0,16  | 0,876483959 | 0,26  | 0,665208114 | 0,13  | 0,887815327 |
| Drd3     | 0,01  | 0,991919022 | -0,33 | 0,730536814 | 0,36  | 0,437676086 | 0     | 0,99893305  | 0     | 0,99888749  |
| Drd4     | -0,14 | 0,806351733 | 0,16  | 0,880865286 | 0,13  | 0,877598693 | -0,14 | 0,829087694 | -0,29 | 0,64934615  |
| Drd5     | 0,12  | 0,788411903 | -0,24 | 0,699023364 | -0,45 | 0,43825018  | 0,21  | 0,638514768 | -0,2  | 0,790424343 |
| Drg1     | -0,37 | 0,39120208  | -0,32 | 0,517104172 | 0,63  | 0,209534486 | 0,08  | 0,925880872 | -0,1  | 0,920979489 |
| Drg2     | -0,55 | 0,325410889 | -0,55 | 0,216491969 | -0,04 | 0,956894731 | 0,71  | 0,117880643 | -0,05 | 0,954370687 |
| Drosha   | -0,6  | 0,295046916 | -0,11 | 0,936792848 | 0,51  | 0,304899885 | -0,1  | 0,90378622  | -0,37 | 0,714465859 |
| Drp2     | 0,33  | 0,600680579 | 0,14  | 0,897038013 | 0,04  | 0,977897176 | -0,31 | 0,720743596 | -0,42 | 0,640213665 |
| Drr1     | 0,12  | 0,815332681 | -0,03 | 0,9588885   | -0,33 | 0,435556279 | 0,12  | 0,730951567 | 0,21  | 0,738853855 |
| Dsc1     | 0,26  | 0,682910371 | 0,12  | 0,890948792 | -0,36 | 0,469053827 | 0,11  | 0,832587841 | -0,01 | 0,990448047 |

|         |       |             |       |             |       |             |       |             |       |             |
|---------|-------|-------------|-------|-------------|-------|-------------|-------|-------------|-------|-------------|
| Dsc2    | 0,07  | 0,94288779  | -0,09 | 0,904651548 | -0,39 | 0,379227535 | 0,13  | 0,8480134   | 0,24  | 0,795723327 |
| Dsc3    | -0,28 | 0,756091915 | -0,73 | 0,378139679 | 0,05  | 0,964349745 | -0,05 | 0,921774207 | -0,36 | 0,507535617 |
| Dscam   | -0,37 | 0,507799043 | -0,09 | 0,859585789 | -0,69 | 0,11637989  | 0,06  | 0,945619692 | 0,08  | 0,946463658 |
| Dscaml1 | -0,06 | 0,941798404 | -0,2  | 0,823530278 | 0,08  | 0,928579125 | 0,16  | 0,845813504 | -0,29 | 0,7446186   |
| Dscc1   | -0,69 | 0,260634235 | -1,53 | 0,109267475 | 0,41  | 0,607009738 | 0,91  | 0,224533543 | -0,23 | 0,848679763 |
| Dscr3   | 0,07  | 0,93992615  | -0,12 | 0,882847123 | 0,76  | 0,422642884 | 0,13  | 0,85301747  | 0,5   | 0,450944522 |
| Dse     | 0,4   | 0,68194299  | -0,41 | 0,479691775 | 0,59  | 0,651559391 | -0,76 | 0,393737712 | 0,4   | 0,728579099 |
| Dsel    | 0,15  | 0,694699901 | 0,1   | 0,932292974 | 0,24  | 0,645334197 | 0,2   | 0,793872229 | 0,05  | 0,96049688  |
| Dsg1c   | 0,34  | 0,610324141 | -0,38 | 0,49125334  | 0,11  | 0,895434884 | 0,36  | 0,619079614 | -0,15 | 0,907798813 |
| Dsg2    | 0,7   | 0,180356049 | 1,09  | 0,322806958 | -0,22 | 0,874098993 | -0,25 | 0,665208114 | -0,14 | 0,893117638 |
| Dsg3    | 0,07  | 0,933912196 | -0,06 | 0,952427593 | -0,18 | 0,716507007 | 0,21  | 0,591966447 | 0,3   | 0,736133095 |
| Dsg4    | 0,08  | 0,932067554 | 0,02  | 0,990715557 | -0,12 | 0,868609956 | -0,13 | 0,758875849 | -0,39 | 0,639785525 |
| Dsn1    | 0,04  | 0,976870178 | 0,1   | 0,935984823 | 0,86  | 0,127267821 | 0,71  | 0,418410394 | -0,28 | 0,764656525 |
| Dsp     | -0,1  | 0,932324918 | 0,07  | 0,912773944 | 1,51  | 0,026246106 | -0,45 | 0,343209274 | 0,11  | 0,947257087 |
| Dspp    | -0,14 | 0,843836953 | -0,04 | 0,972706967 | 0,15  | 0,816360932 | -0,21 | 0,682921162 | -0,43 | 0,404813316 |
| Dst     | 0,22  | 0,656726345 | 0,07  | 0,880362561 | -0,53 | 0,339425194 | 0,93  | 0,180483139 | 0,14  | 0,895756587 |
| Dstn    | -0,03 | 0,958821517 | -0,04 | 0,943915456 | 0,39  | 0,580783959 | 0,03  | 0,963752888 | -0,13 | 0,889954957 |
| Dstyk   | -0,36 | 0,561405935 | 0,1   | 0,912137323 | 0,27  | 0,779970041 | -1,6  | 0,023024676 | -0,4  | 0,574285481 |
| Dtd1    | -0,05 | 0,949868652 | 0,09  | 0,929289366 | -0,3  | 0,642008011 | -0,82 | 0,187648401 | 0,24  | 0,74495703  |
| Dtd2    | 0,21  | 0,685972631 | 0,06  | 0,915434803 | 0,75  | 0,376628542 | -0,12 | 0,768620889 | -0,27 | 0,628127128 |
| Dthd1   | 0,38  | 0,494787323 | 0,27  | 0,724772268 | 0,08  | 0,909963525 | -0,45 | 0,514056206 | -0,25 | 0,82482852  |
| Dtl     | -1,56 | 0,215708749 | -2,23 | 0,040620931 | 2,58  | 0,068894819 | 3,19  | 0,007469468 | -0,96 | 0,167270572 |
| Dtna    | 0,07  | 0,921565185 | -0,05 | 0,972706967 | 0,36  | 0,39784972  | -0,64 | 0,604127556 | -0,29 | 0,852287138 |
| Dtnb    | -0,66 | 0,394038335 | -0,68 | 0,275147283 | 0,85  | 0,163974924 | -0,55 | 0,246087291 | 0,08  | 0,937558003 |
| Dtnbp1  | -0,01 | 0,994117687 | -0,18 | 0,651581125 | -0,26 | 0,64759465  | -0,23 | 0,728249817 | 0,07  | 0,946170694 |
| Dtwd1   | -0,26 | 0,859600103 | -0,6  | 0,766425161 | 0,76  | 0,432776468 | -0,32 | 0,713169855 | -0,17 | 0,914176188 |
| Dtwd2   | -0,13 | 0,846313357 | 0,06  | 0,979406438 | -0,03 | 0,969766446 | -0,49 | 0,373655368 | -0,39 | 0,712121015 |
| Dtx1    | -0,04 | 0,975506993 | -0,15 | 0,802788292 | -0,08 | 0,965571357 | -0,64 | 0,189130106 | -0,16 | 0,838530657 |
| Dtx2    | -0,32 | 0,757032046 | 0,34  | 0,703412272 | 0,05  | 0,963725374 | -0,17 | 0,846098872 | 0,02  | 0,984125319 |
| Dtx3    | 0     | 0,998307191 | -0,09 | 0,896187678 | -0,04 | 0,968874924 | -0,72 | 0,398422441 | -0,76 | 0,414466684 |
| Dtx3l   | 1,44  | 0,104092085 | 0,93  | 0,097835542 | -1,53 | 0,019836098 | 0,57  | 0,17725751  | 1,52  | 0,01250776  |
| Dtx4    | -0,01 | 0,992488306 | 0,08  | 0,901000778 | 0,63  | 0,21193347  | 0,52  | 0,560823199 | 0,51  | 0,540089233 |
| Dtymk   | -0,95 | 0,194005514 | -1,01 | 0,277568816 | 1,2   | 0,348577918 | 0,42  | 0,449259448 | -0,15 | 0,879075155 |
| Dubr    | -0,08 | 0,949437499 | -0,5  | 0,65041955  | 0,17  | 0,914134206 | -0,06 | 0,928002892 | -0,21 | 0,801385411 |
| Duox1   | -0,24 | 0,856887426 | 0,54  | 0,640836969 | 0,26  | 0,798107953 | -0,21 | 0,682970612 | 0,36  | 0,616002226 |

|        |       |             |       |             |       |             |       |             |       |             |
|--------|-------|-------------|-------|-------------|-------|-------------|-------|-------------|-------|-------------|
| Duox2  | -0,21 | 0,773899768 | -0,39 | 0,439108392 | 0,01  | 0,996286252 | -0,08 | 0,938960155 | -0,16 | 0,890957032 |
| Duoxa1 | -0,14 | 0,88956316  | 0,3   | 0,769023033 | 0,29  | 0,760721308 | -0,52 | 0,338591881 | -0,13 | 0,91339829  |
| Duoxa2 | 0,22  | 0,681105812 | -0,13 | 0,791519472 | -0,24 | 0,776071062 | -0,82 | 0,05029287  | -0,25 | 0,846526184 |
| Dupd1  | -0,14 | 0,821267687 | -0,38 | 0,565456041 | -0,11 | 0,901032944 | 0,33  | 0,482244044 | -0,15 | 0,827532593 |
| Dus1l  | -0,58 | 0,322835282 | -0,25 | 0,761404909 | 0,27  | 0,841464759 | 0,47  | 0,812244154 | -0,17 | 0,948080686 |
| Dus2   | 0,08  | 0,948926586 | -0,55 | 0,664787536 | -0,15 | 0,875918909 | 0,36  | 0,69533596  | 0,17  | 0,889884382 |
| Dus3l  | -0,19 | 0,701086418 | 0,03  | 0,981758111 | 0,21  | 0,833373493 | 0,05  | 0,951165039 | -0,05 | 0,974553568 |
| Dus4l  | -1,15 | 0,150740163 | -1,11 | 0,302028989 | 0,66  | 0,589451508 | -1,47 | 0,065441734 | -0,24 | 0,85041485  |
| Dusp1  | -0,26 | 0,474293292 | 0,08  | 0,900801202 | -0,01 | 0,99452103  | -0,36 | 0,279468276 | -0,09 | 0,886125266 |
| Dusp10 | 0,72  | 0,301180874 | 1,03  | 0,200674509 | 0,32  | 0,628978443 | -0,04 | 0,966701307 | 0,44  | 0,471919432 |
| Dusp11 | 0,31  | 0,584231725 | 0,05  | 0,940852764 | -0,08 | 0,948637233 | 0,41  | 0,180740963 | 0,49  | 0,304393671 |
| Dusp12 | -0,14 | 0,883785501 | -0,17 | 0,846053226 | -0,21 | 0,885800676 | -0,17 | 0,713260063 | 0,03  | 0,97813852  |
| Dusp13 | 0,21  | 0,758094656 | 0,17  | 0,818198749 | 0,24  | 0,714397348 | -0,13 | 0,800899563 | -0,09 | 0,921263496 |
| Dusp14 | 0,4   | 0,287459734 | 0,06  | 0,946885634 | 0,76  | 0,186321498 | -0,19 | 0,665573651 | -0,03 | 0,980945466 |
| Dusp15 | 0,05  | 0,950897622 | -0,19 | 0,750273889 | 0,16  | 0,79541037  | -0,02 | 0,985069942 | -0,02 | 0,992370267 |
| Dusp16 | -0,06 | 0,954349573 | 0,27  | 0,577638608 | 0,78  | 0,198762674 | 0,67  | 0,177569419 | 0,45  | 0,458543049 |
| Dusp18 | -0,32 | 0,676906193 | 0,08  | 0,916496897 | -0,04 | 0,968742139 | -0,13 | 0,779017952 | 0,32  | 0,608004947 |
| Dusp19 | 0,38  | 0,820785667 | 0,1   | 0,902148738 | -0,19 | 0,821451696 | 0,29  | 0,521184735 | -0,44 | 0,51266931  |
| Dusp2  | 0,43  | 0,355779967 | 0,64  | 0,40486209  | -0,01 | 0,997394645 | 2,79  | 0,009870967 | 0,29  | 0,770990823 |
| Dusp21 | 0,08  | 0,894248924 | 0,13  | 0,882918801 | -0,22 | 0,815942732 | -0,06 | 0,925196626 | 0,06  | 0,949544475 |
| Dusp22 | 0,43  | 0,614878886 | 0,58  | 0,22001825  | -0,36 | 0,590565136 | 0,27  | 0,817536845 | 0,13  | 0,934242963 |
| Dusp23 | 0,23  | 0,580909375 | -0,02 | 0,995605655 | -0,73 | 0,230892293 | -0,14 | 0,735069112 | -0,5  | 0,25798466  |
| Dusp26 | 0,56  | 0,210544026 | -0,55 | 0,51915071  | -0,92 | 0,543291636 | -1,33 | 0,039459353 | 0,34  | 0,587576064 |
| Dusp27 | 0,22  | 0,676906193 | 0,04  | 0,95021587  | 0,1   | 0,896387294 | -0,16 | 0,736251815 | 0,1   | 0,912250982 |
| Dusp28 | -0,19 | 0,787216618 | -0,15 | 0,791442364 | -0,48 | 0,436827113 | -0,1  | 0,847253572 | 0,14  | 0,886846338 |
| Dusp3  | -0,8  | 0,460231397 | 0,45  | 0,701492683 | 1,02  | 0,486966073 | -0,72 | 0,296322125 | -0,48 | 0,6425144   |
| Dusp4  | -0,44 | 0,470166881 | 0,23  | 0,812664394 | 1,44  | 0,045278475 | -0,43 | 0,27906148  | -0,08 | 0,910301996 |
| Dusp5  | 0,18  | 0,672174462 | 0,48  | 0,404968424 | 0,26  | 0,689058581 | 1,1   | 0,075379341 | -0,14 | 0,915067495 |
| Dusp6  | 0,06  | 0,90814211  | 0,33  | 0,561004864 | -0,61 | 0,140691395 | -0,76 | 0,084269547 | 0,06  | 0,947254077 |
| Dusp7  | -0,27 | 0,494679097 | 0,06  | 0,920544315 | 0,15  | 0,820240134 | -0,78 | 0,093121476 | -0,22 | 0,728578071 |
| Dusp8  | -0,04 | 0,970463755 | 0,42  | 0,541169365 | -0,32 | 0,696594185 | 0,74  | 0,171282602 | -0,39 | 0,568949282 |
| Dusp9  | -0,22 | 0,633057708 | -0,31 | 0,581931436 | 0,6   | 0,509977728 | 0,35  | 0,50767417  | 0,21  | 0,80484971  |
| Dut    | -1,42 | 0,074890017 | -1,37 | 0,121175304 | 1,06  | 0,072423715 | 1,13  | 0,138796534 | -0,48 | 0,642726581 |
| Dux    | 0,12  | 0,905414735 | 0,04  | 0,942410245 | -0,09 | 0,898935616 | -0,35 | 0,577554164 | -0,25 | 0,715198611 |
| Duxbl2 | 0,72  | 0,390360486 | -0,24 | 0,792551081 | 0,07  | 0,944266382 | 0,02  | 0,980562469 | -0,17 | 0,827150612 |



|          |       |             |       |             |       |             |       |             |       |             |
|----------|-------|-------------|-------|-------------|-------|-------------|-------|-------------|-------|-------------|
| Dvl1     | -0,02 | 0,986782335 | 0,27  | 0,722181184 | 0,08  | 0,948410921 | -0,43 | 0,342459451 | 0,57  | 0,257751018 |
| Dvl2     | -0,33 | 0,617280733 | 0,32  | 0,709432782 | 0,59  | 0,224747376 | -0,83 | 0,111545975 | -0,47 | 0,445260584 |
| Dvl3     | -0,35 | 0,707502054 | -0,08 | 0,904698551 | 0,34  | 0,761729712 | -0,18 | 0,647512496 | -0,7  | 0,115189403 |
| DXBay18  | 0,04  | 0,977621877 | -0,35 | 0,480808447 | 0,17  | 0,859167721 | 0,55  | 0,220646497 | -0,08 | 0,935548264 |
| Dxo      | 0,16  | 0,698332739 | 0     | 1           | -0,06 | 0,946810097 | -0,37 | 0,287818239 | -0,36 | 0,532930834 |
| Dydc1    | -0,26 | 0,555027419 | -0,1  | 0,943915456 | 0,06  | 0,940550094 | -0,02 | 0,983241076 | -0,15 | 0,825272094 |
| Dydc2    | 0,45  | 0,653052749 | 0,39  | 0,676683279 | 0,57  | 0,402779579 | 0,09  | 0,94307532  | 0,42  | 0,70401038  |
| Dym      | -0,13 | 0,905410816 | -0,17 | 0,680709276 | -0,07 | 0,938323709 | 0,13  | 0,729857506 | -0,2  | 0,751267508 |
| Dynap    | -0,23 | 0,67806773  | -0,27 | 0,812459283 | 2,08  | 0,124912754 | 0,05  | 0,959958662 | -0,05 | 0,970154126 |
| Dync1h1  | -0,01 | 0,991919022 | -0,05 | 0,9381453   | -0,09 | 0,90569262  | -0,06 | 0,900618083 | 0,01  | 0,988084587 |
| Dync1i1  | -0,1  | 0,927080959 | 0,3   | 0,834220463 | 0,27  | 0,798348773 | -0,31 | 0,432654904 | -0,35 | 0,780016298 |
| Dync1i2  | -0,01 | 0,988509744 | 0,27  | 0,531993971 | 0,18  | 0,772008734 | 0,16  | 0,802095761 | 0,38  | 0,553650211 |
| Dync1li1 | 0,12  | 0,816465857 | -0,15 | 0,721114342 | 0,35  | 0,638954786 | 0,45  | 0,335352248 | 0,12  | 0,881968395 |
| Dync1li2 | -0,25 | 0,65525391  | 0,13  | 0,83389171  | -0,13 | 0,858001959 | 0,51  | 0,430550219 | 0,35  | 0,689582775 |
| Dync2h1  | -0,27 | 0,689253784 | -0,11 | 0,89034555  | -0,03 | 0,976092199 | -0,34 | 0,297014116 | 0,94  | 0,125300085 |
| Dync2li1 | -0,05 | 0,970154743 | 0,25  | 0,747928263 | 0,36  | 0,597656209 | -0,95 | 0,328472681 | -0,53 | 0,686645773 |
| Dynll1   | 0,16  | 0,890184407 | 0,08  | 0,919873208 | 0,01  | 0,993379272 | -0,92 | 0,140579662 | 0,12  | 0,928724353 |
| Dynll2   | -0,01 | 0,991516118 | -0,13 | 0,900801202 | 0,49  | 0,452591628 | -0,45 | 0,533941098 | 0,2   | 0,825990389 |
| Dynlrb1  | -0,04 | 0,943079514 | -0,22 | 0,605292801 | 0,03  | 0,979791644 | 0,21  | 0,610149813 | -0,28 | 0,597080822 |
| Dynlrb2  | 0,57  | 0,612555967 | 0,59  | 0,495561337 | -0,56 | 0,396750979 | -0,37 | 0,529983019 | -0,58 | 0,382447175 |
| Dynlt1a  | -0,27 | 0,54401985  | -0,21 | 0,586775333 | 0,32  | 0,465949919 | 1,12  | 0,060887351 | -0,12 | 0,890797922 |
| Dynlt1f  | 0,1   | 0,944685982 | -0,09 | 0,953355735 | -0,77 | 0,179552168 | 0,35  | 0,601868312 | 0,16  | 0,853107295 |
| Dynlt3   | -0,11 | 0,823638027 | -0,02 | 0,983496065 | -0,06 | 0,948161279 | -0,13 | 0,701881546 | -0,18 | 0,792404969 |
| Dyrk1a   | 0,48  | 0,445885062 | -0,06 | 0,945374636 | 0,73  | 0,343594254 | -0,22 | 0,737836742 | -0,18 | 0,843224122 |
| Dyrk1b   | -0,05 | 0,938708479 | -0,07 | 0,88928164  | 0,42  | 0,402615209 | -0,62 | 0,08108365  | -0,42 | 0,479585604 |
| Dyrk2    | -0,03 | 0,971351449 | 0,16  | 0,817367084 | -0,25 | 0,738804472 | 0,23  | 0,632939682 | -0,14 | 0,834151277 |
| Dyrk3    | 0,87  | 0,227753128 | 1,11  | 0,294241321 | 0,93  | 0,433353965 | 1,32  | 0,247282868 | -0,3  | 0,772330824 |
| Dyrk4    | -0,02 | 0,973882565 | -0,08 | 0,945366485 | -0,17 | 0,791940256 | 0,12  | 0,895880186 | -0,04 | 0,965244101 |
| Dysf     | -0,51 | 0,157853388 | -0,35 | 0,346218909 | 0,1   | 0,888956864 | -0,18 | 0,667849424 | -0,06 | 0,944318268 |
| Dytn     | -0,11 | 0,892823025 | 0,11  | 0,807463629 | 0,19  | 0,840187016 | 0,18  | 0,753127323 | 0,01  | 0,992499729 |
| Dyx1c1   | -0,04 | 0,957163428 | 0     | 0,999395995 | -0,26 | 0,62535327  | 0,01  | 0,997274509 | 0,33  | 0,626176831 |
| Dzank1   | -0,24 | 0,549885299 | -0,03 | 0,984000632 | -0,09 | 0,90665     | -1,15 | 0,116838516 | -0,87 | 0,190957311 |
| Dzip1    | -0,24 | 0,782369077 | 0,19  | 0,726494244 | -0,09 | 0,901211921 | -0,54 | 0,103691692 | -0,15 | 0,884640084 |
| Dzip1l   | 0,37  | 0,771904131 | 0,26  | 0,544440118 | 0,6   | 0,260131517 | -0,41 | 0,599213254 | -0,25 | 0,852954345 |
| Dzip3    | -0,08 | 0,956452501 | -0,44 | 0,724503625 | 0,64  | 0,376479341 | 0,19  | 0,812244154 | -0,07 | 0,953297732 |

|               |       |             |       |             |       |             |       |             |       |             |
|---------------|-------|-------------|-------|-------------|-------|-------------|-------|-------------|-------|-------------|
| E030003E18Rik | -0,07 | 0,902084882 | 0,11  | 0,84748177  | -0,21 | 0,732675311 | -0,01 | 0,987316384 | -0,16 | 0,792346596 |
| E030011O05Rik | 0,68  | 0,132779189 | 0,53  | 0,494666675 | 0,23  | 0,811564759 | -0,68 | 0,267039734 | -0,52 | 0,606713572 |
| E030013I19Rik | 0,01  | 0,986216037 | -0,28 | 0,59090251  | -0,14 | 0,784775459 | -0,07 | 0,907485612 | -0,11 | 0,90197982  |
| E030018B13Rik | 0,19  | 0,846339519 | -0,26 | 0,547143296 | -0,16 | 0,840565368 | 0,44  | 0,431967511 | 0,08  | 0,918529364 |
| E030019B13Rik | 0,05  | 0,958188047 | 0,11  | 0,934602811 | 0,08  | 0,921956183 | 0,05  | 0,941483354 | -0,12 | 0,890833196 |
| E030024N20Rik | 1,02  | 0,137844388 | 0,45  | 0,669713758 | -0,15 | 0,887458532 | -0,45 | 0,460792197 | 0,12  | 0,864049783 |
| E030025P04Rik | 0,09  | 0,923180948 | 0,22  | 0,716668427 | -0,08 | 0,949633833 | 0,15  | 0,765338637 | 0,56  | 0,497315775 |
| E030030I06Rik | 0,08  | 0,919567534 | 0,08  | 0,885546436 | 0,03  | 0,965656549 | 0,03  | 0,95724759  | -0,01 | 0,9939542   |
| E030042O20Rik | 0,07  | 0,923033769 | -0,43 | 0,547143296 | -0,18 | 0,819509208 | -0,24 | 0,539032331 | -0,13 | 0,843383597 |
| E030044B06Rik | -0,06 | 0,939308558 | 0,22  | 0,852461907 | 0,1   | 0,939921221 | -0,1  | 0,909976349 | -0,04 | 0,960974478 |
| E030046B03Rik | 0,17  | 0,728739942 | 0,08  | 0,912379377 | -0,67 | 0,12691088  | -0,24 | 0,709570719 | 0,23  | 0,765327693 |
| E030047D23Rik | 0,86  | 0,220541198 | -0,25 | 0,857046685 | -0,1  | 0,959437564 | 1,06  | 0,233583206 | -0,46 | 0,378967925 |
| E130006D01Rik | 0,27  | 0,56461489  | 0,04  | 0,95429671  | -0,03 | 0,968008918 | -0,51 | 0,420243052 | -0,26 | 0,728483022 |
| E130008D07Rik | 0,48  | 0,259993571 | -0,08 | 0,946599376 | -0,09 | 0,917694073 | 0,46  | 0,249212736 | 0,22  | 0,812229801 |
| E130012A19Rik | -0,19 | 0,758514941 | -0,43 | 0,345268022 | 0,45  | 0,506787649 | -0,26 | 0,415968391 | -0,56 | 0,456658287 |
| E130018N17Rik | 0,2   | 0,795936199 | -0,11 | 0,938711163 | -0,27 | 0,635949477 | -0,1  | 0,80795564  | -0,04 | 0,960974478 |
| E130018O15Rik | -0,19 | 0,800851935 | -0,38 | 0,537678815 | -0,53 | 0,253451264 | 0,16  | 0,78865406  | 0,15  | 0,871044233 |
| E130102H24Rik | -0,16 | 0,828332985 | 0,24  | 0,670859269 | -0,02 | 0,981393315 | -0,73 | 0,085964255 | 0,07  | 0,933064949 |
| E130111B04Rik | 0     | 0,997285684 | -0,01 | 0,990380046 | -0,16 | 0,748069534 | 0,05  | 0,901395825 | 0,01  | 0,991628025 |
| E130112N10Rik | -0,24 | 0,624521061 | -0,69 | 0,465375555 | 0,37  | 0,541560473 | 0,05  | 0,944802384 | -0,5  | 0,375162254 |
| E130114P18Rik | -0,08 | 0,934759867 | -0,13 | 0,880473303 | -0,15 | 0,913228427 | 0,39  | 0,538467543 | 0,27  | 0,791694696 |
| E130116L18Rik | 0,24  | 0,596550801 | 0,04  | 0,945374636 | -0,25 | 0,579159818 | 0,26  | 0,696843539 | 0,49  | 0,596092228 |
| E130120K24Rik | 0,35  | 0,36631183  | 0,1   | 0,850048209 | -0,02 | 0,982305856 | -0,14 | 0,660443663 | 0,01  | 0,9939542   |
| E130201H02Rik | 0     | 0,996219097 | -0,01 | 0,994735911 | 0,09  | 0,904239687 | 0,35  | 0,477330342 | 0,13  | 0,861056054 |
| E130215H24Rik | 0,41  | 0,306829062 | -0,03 | 0,965796793 | -0,03 | 0,964617206 | 0,08  | 0,855472984 | 0,01  | 0,991418175 |
| E130218H05    | 0,07  | 0,922118639 | 0,17  | 0,726534004 | -0,17 | 0,8271738   | -0,09 | 0,823963621 | -0,07 | 0,934295152 |
| E130218I03Rik | 0,12  | 0,869565514 | 0,14  | 0,858935338 | -0,01 | 0,993379272 | -0,17 | 0,74162714  | -0,21 | 0,742982183 |
| E130304I02Rik | 0,14  | 0,897717279 | -0,17 | 0,754761006 | -0,13 | 0,830685724 | 0,11  | 0,858484804 | 0,09  | 0,913553402 |
| E130307A14Rik | 0,14  | 0,841685426 | -0,11 | 0,881138991 | 0,06  | 0,949553487 | -0,52 | 0,171262841 | -0,15 | 0,82122041  |
| E130308A19Rik | -0,22 | 0,738714467 | 0,21  | 0,69843     | 0,13  | 0,807926482 | 0,15  | 0,810891431 | 0,45  | 0,395349481 |
| E130309D02Rik | 0,26  | 0,758636946 | -0,06 | 0,935041212 | 0,12  | 0,880706627 | 0,59  | 0,599550126 | -0,08 | 0,968952017 |
| E130310I04Rik | -0,04 | 0,94913976  | -0,01 | 0,995205602 | -0,03 | 0,978270913 | 0,08  | 0,893563396 | -0,02 | 0,982175252 |
| E130311K13Rik | -0,31 | 0,421539482 | -0,18 | 0,726652101 | -0,28 | 0,68693754  | -0,67 | 0,228384791 | -0,57 | 0,336241717 |
| E130317F20Rik | 0,05  | 0,948926586 | -0,17 | 0,7280655   | -0,04 | 0,956894731 | -0,28 | 0,663160203 | -0,26 | 0,720142818 |
| E230001N04Rik | -0,09 | 0,909477787 | -0,01 | 0,994137877 | -0,19 | 0,707539555 | -1,23 | 0,032054701 | -0,7  | 0,22725174  |

|               |       |             |       |             |       |             |       |             |       |             |
|---------------|-------|-------------|-------|-------------|-------|-------------|-------|-------------|-------|-------------|
| E230008O15Rik | 0,44  | 0,673060412 | 0,15  | 0,80192513  | -0,05 | 0,968742139 | -0,19 | 0,599684553 | 0,38  | 0,623524521 |
| E230013L22Rik | 0,09  | 0,860773832 | 0,39  | 0,470430135 | -0,47 | 0,320419358 | -0,24 | 0,551681549 | 0,37  | 0,608004947 |
| E230015B07Rik | -0,01 | 0,993728727 | -0,15 | 0,765370871 | 0,02  | 0,986800862 | 0,35  | 0,261681706 | 0,28  | 0,652746284 |
| E230016K23Rik | 0,43  | 0,239601221 | -0,01 | 0,997700959 | 0,02  | 0,9817956   | 0,04  | 0,958939766 | 0,17  | 0,800275638 |
| E230016M11Rik | 0,18  | 0,891309235 | 0,94  | 0,579543516 | 0,12  | 0,929395646 | -0,72 | 0,529426866 | -1,18 | 0,308256382 |
| E230025N22Rik | -0,22 | 0,642385552 | 0,14  | 0,785627627 | -0,46 | 0,340237423 | 0,06  | 0,907539958 | 0,23  | 0,735152891 |
| E230029C05Rik | -0,07 | 0,947117278 | -0,14 | 0,781665479 | 0,14  | 0,791083767 | 0,2   | 0,704798975 | -0,06 | 0,961749007 |
| E2f1          | -0,73 | 0,190677329 | -0,69 | 0,502255372 | 0,98  | 0,124912754 | 1,52  | 0,056869126 | -0,41 | 0,404813316 |
| E2f2          | 0,16  | 0,853351904 | -0,84 | 0,278438834 | 0,22  | 0,837999835 | 0,83  | 0,062706109 | -0,3  | 0,635612479 |
| E2f3          | -0,05 | 0,954516418 | -0,24 | 0,684980945 | 0,49  | 0,707012534 | 2,16  | 0,118061566 | 0,81  | 0,573405587 |
| E2f4          | -0,11 | 0,886741208 | -0,05 | 0,92585897  | 0,18  | 0,847688308 | 0,27  | 0,678009232 | 0,08  | 0,944318268 |
| E2f5          | -0,83 | 0,137844388 | -0,07 | 0,949169865 | 0,45  | 0,601033617 | 0     | 0,997816344 | 0,11  | 0,88064229  |
| E2f6          | -0,53 | 0,611644482 | -0,55 | 0,668632197 | 0,72  | 0,189578329 | -0,12 | 0,77073646  | -0,92 | 0,633449435 |
| E2f7          | 0,11  | 0,849091528 | 0,27  | 0,683509429 | 0,63  | 0,448189249 | 1,64  | 0,036841765 | 0,72  | 0,333484688 |
| E2f8          | -1,42 | 0,070467257 | -1,11 | 0,136989909 | 2,22  | 0,063029438 | 2,34  | 0,012175785 | 0,09  | 0,923039028 |
| E330009J07Rik | -0,63 | 0,279386788 | -0,38 | 0,732834316 | 0,35  | 0,660920525 | -0,02 | 0,989926105 | -0,3  | 0,865258929 |
| E330010L02Rik | 0,33  | 0,657124524 | -0,03 | 0,957906092 | -0,21 | 0,791443482 | -0,03 | 0,970163463 | 0,14  | 0,861347363 |
| E330011O21Rik | -0,21 | 0,720829271 | -0,07 | 0,886660621 | -0,02 | 0,980713449 | 0,49  | 0,228524998 | 0,36  | 0,654732327 |
| E330012B07Rik | 0,15  | 0,882500171 | 0,65  | 0,472042875 | -0,19 | 0,789902399 | -0,81 | 0,10364648  | 0,44  | 0,483221438 |
| E330013P04Rik | 2,53  | 0,111844532 | 1,45  | 0,163815354 | -2,39 | 0,068894819 | 4,53  | 0,003907268 | 0,2   | 0,80222716  |
| E330014E10Rik | 0,37  | 0,736503749 | 0,27  | 0,844057364 | -0,36 | 0,774141292 | 0,01  | 0,995026901 | 0,64  | 0,526113427 |
| E330016L19Rik | 0,11  | 0,821267687 | 0,03  | 0,970388896 | -0,14 | 0,846176253 | 0,01  | 0,99282298  | 0,1   | 0,900436874 |
| E330017A01Rik | -0,08 | 0,94918265  | 0,36  | 0,641804702 | -0,8  | 0,347987056 | -0,02 | 0,98423292  | 0,24  | 0,872417427 |
| E330017L17Rik | -0,17 | 0,758636946 | -0,07 | 0,94892312  | 0,23  | 0,702423238 | 0,21  | 0,763571545 | 0,19  | 0,819072786 |
| E330020D12Rik | 0,29  | 0,663447662 | -0,03 | 0,989036108 | -0,08 | 0,940276719 | 0,15  | 0,882842038 | -0,33 | 0,697818445 |
| E330021D16Rik | 0,06  | 0,917934832 | 0,06  | 0,934438798 | -0,28 | 0,663652196 | 0,15  | 0,656038987 | -0,18 | 0,774518756 |
| E330023G01Rik | 0,14  | 0,780020938 | -0,24 | 0,664787536 | -0,26 | 0,818205188 | 0,21  | 0,672122673 | 0,16  | 0,884244347 |
| E330027M22Rik | 0,05  | 0,926007268 | 0,08  | 0,862480933 | -0,19 | 0,740611352 | -0,01 | 0,979420434 | -0,07 | 0,939448119 |
| E330033B04Rik | 0,61  | 0,149941264 | 0,06  | 0,926157704 | 0,03  | 0,973802765 | -0,08 | 0,874904932 | -0,36 | 0,525018839 |
| E330034G19Rik | 0,61  | 0,568885525 | -0,33 | 0,595088577 | 0,02  | 0,982648972 | 0,33  | 0,736345201 | -0,21 | 0,883592868 |
| E430002N23Rik | 0,03  | 0,959065027 | 0,11  | 0,800591362 | -0,29 | 0,527929204 | -0,03 | 0,943143586 | 0,11  | 0,873098396 |
| E430016F16Rik | 0,17  | 0,825308689 | 0,03  | 0,989205598 | -0,1  | 0,904057901 | -0,16 | 0,833013516 | -0,14 | 0,904040121 |
| E430018J23Rik | 0,06  | 0,946485591 | 0,59  | 0,646693191 | 0,68  | 0,605123517 | -1,27 | 0,197243924 | -1,17 | 0,053074184 |
| E430024P14Rik | 0,07  | 0,972112267 | -0,99 | 0,508633526 | 0,22  | 0,77115153  | 0,18  | 0,898074448 | -0,57 | 0,654872635 |
| E430025E21Rik | 0,04  | 0,963914207 | -0,08 | 0,891749049 | 0,27  | 0,66424919  | 0,26  | 0,543772264 | 0,07  | 0,930575749 |

|               |       |             |       |             |       |             |       |             |       |             |
|---------------|-------|-------------|-------|-------------|-------|-------------|-------|-------------|-------|-------------|
| E4f1          | -0,68 | 0,206075224 | -0,3  | 0,773751321 | 0,56  | 0,50228327  | -0,27 | 0,471786662 | -0,36 | 0,574285481 |
| E530001F21Rik | 0,09  | 0,880092027 | 0,04  | 0,948409105 | -0,11 | 0,861307315 | -0,01 | 0,979516321 | -0,06 | 0,942935749 |
| E530001K10Rik | 0,26  | 0,628311699 | 0,25  | 0,582478031 | -0,26 | 0,70365819  | -0,3  | 0,726158589 | 0,02  | 0,984847718 |
| E530011L22Rik | 0,29  | 0,46691413  | -0,14 | 0,820557322 | -0,24 | 0,71705844  | 0,1   | 0,798893106 | -0,18 | 0,778000995 |
| Eaf1          | -0,27 | 0,628835616 | 0,11  | 0,843162191 | -0,13 | 0,85092959  | 0,54  | 0,112628915 | -0,02 | 0,98384409  |
| Eaf2          | 0,22  | 0,733667688 | 0,34  | 0,379787792 | -0,24 | 0,731438246 | -0,24 | 0,560223278 | -0,05 | 0,959573673 |
| Eapp          | -0,04 | 0,961631733 | 0,38  | 0,424068004 | -0,21 | 0,777417583 | -0,43 | 0,230299363 | 0,39  | 0,420470441 |
| Ear1          | -0,37 | 0,559644874 | 0,04  | 0,96845995  | -0,05 | 0,94968597  | -0,04 | 0,918795752 | 0,14  | 0,859666678 |
| Ear10         | 0,09  | 0,869565514 | 0,24  | 0,756831565 | 0,16  | 0,744387748 | -0,06 | 0,891773132 | 0,13  | 0,886277205 |
| Ear2          | 0,18  | 0,729108809 | 0,26  | 0,728434379 | -0,24 | 0,794542194 | -0,2  | 0,577709198 | 0,03  | 0,97739601  |
| Ear6          | 0,09  | 0,900892804 | -0,07 | 0,893804228 | 0,26  | 0,629611104 | 0,42  | 0,229765366 | 0,15  | 0,825209656 |
| Ears2         | -0,69 | 0,310600448 | 0,26  | 0,708738408 | -0,16 | 0,940550094 | -0,34 | 0,466936852 | 0     | 0,999773334 |
| Ebag9         | 0,06  | 0,967380775 | 0,64  | 0,187729631 | -0,24 | 0,853276446 | -0,34 | 0,733180794 | 0,05  | 0,980945466 |
| Ebf1          | -0,43 | 0,597519827 | -0,09 | 0,883093763 | -0,01 | 0,996286252 | -1,4  | 0,012175785 | -0,33 | 0,508474855 |
| Ebf2          | -0,15 | 0,935607349 | 0,42  | 0,434358293 | -0,12 | 0,938322304 | -0,2  | 0,756738618 | -0,37 | 0,778035199 |
| Ebf3          | -0,63 | 0,274449691 | -0,21 | 0,760291843 | 0,29  | 0,7272886   | 1,96  | 0,015975596 | -0,19 | 0,84547704  |
| Ebf4          | -0,2  | 0,724976228 | -0,15 | 0,879707211 | -0,14 | 0,858972056 | -1,19 | 0,086473355 | -0,4  | 0,470021545 |
| Ebi3          | -0,24 | 0,652260778 | -0,07 | 0,947684955 | -0,24 | 0,787094995 | 0,08  | 0,901792848 | -0,32 | 0,571122283 |
| Ebna1bp2      | -0,33 | 0,586708392 | -0,59 | 0,312857159 | 0,05  | 0,963357998 | 0,87  | 0,204791706 | 0,23  | 0,789332757 |
| Ebp           | 0,29  | 0,595245851 | 0,53  | 0,597247228 | 0,19  | 0,816883729 | -0,41 | 0,250065242 | 0,24  | 0,676132909 |
| Ebpl          | 0,47  | 0,475761281 | 0,86  | 0,224939184 | 0,82  | 0,563934293 | 0,57  | 0,516439928 | -0,69 | 0,496305418 |
| Ecd           | 0,08  | 0,931282908 | -0,25 | 0,649611595 | 0,42  | 0,661747229 | 0,37  | 0,304859408 | -0,38 | 0,508574468 |
| Ece1          | -0,23 | 0,617280733 | -0,03 | 0,956049982 | 0,12  | 0,806793994 | 0,19  | 0,633112881 | -0,69 | 0,134975165 |
| Ece2          | -0,05 | 0,96180221  | -0,16 | 0,824927818 | -0,03 | 0,977939889 | -0,05 | 0,911253055 | -0,19 | 0,860292816 |
| Ecel1         | 0,16  | 0,683267007 | 0,17  | 0,840556546 | 0,01  | 0,993379272 | -0,27 | 0,677203644 | -0,13 | 0,912733818 |
| Ech1          | -0,14 | 0,795936199 | 0,06  | 0,935329426 | -0,05 | 0,962542727 | -0,44 | 0,303816416 | -0,3  | 0,615777631 |
| Echdc1        | 0,19  | 0,782203502 | 0,01  | 0,997935558 | -0,1  | 0,873047668 | 0,51  | 0,339095785 | 0,01  | 0,995481791 |
| Echdc2        | 0,53  | 0,437618775 | 0,1   | 0,929692416 | -0,14 | 0,871001035 | 0,09  | 0,940340488 | 0,33  | 0,764656525 |
| Echdc3        | 0     | 0,997437552 | -0,13 | 0,915265253 | 0,36  | 0,548288344 | -0,61 | 0,450900185 | -0,38 | 0,701874538 |
| Echs1         | -0,25 | 0,587011701 | 0,14  | 0,813770396 | -0,27 | 0,758018953 | -0,45 | 0,202599127 | -0,14 | 0,835191    |
| Eci1          | -0,11 | 0,85361966  | 0,04  | 0,981586987 | 0,35  | 0,579926336 | -0,69 | 0,378733712 | -0,37 | 0,562561822 |
| Eci2          | -0,75 | 0,496123406 | -0,64 | 0,409966386 | 1,1   | 0,098009717 | 0,48  | 0,726953267 | -0,45 | 0,763277172 |
| Eci3          | 0,35  | 0,514309847 | -0,53 | 0,426088176 | -0,54 | 0,465936592 | -0,12 | 0,931624956 | 0,08  | 0,957830821 |
| Ecm1          | 1,78  | 0,071414806 | 1,83  | 0,139527215 | -1,05 | 0,086069681 | 0,41  | 0,596561607 | -0,19 | 0,75695866  |
| Ecm2          | 0,05  | 0,973083901 | -0,38 | 0,633883634 | 1,05  | 0,339716332 | -1,81 | 0,01341954  | -0,7  | 0,381486385 |

|           |       |             |       |             |       |             |       |             |       |             |
|-----------|-------|-------------|-------|-------------|-------|-------------|-------|-------------|-------|-------------|
| Ecscr     | 0,1   | 0,870767545 | 0,16  | 0,750273889 | -0,25 | 0,59777412  | 0,56  | 0,359229104 | 0,68  | 0,293819083 |
| Ecsit     | -0,35 | 0,520667704 | -0,16 | 0,751316952 | 0,61  | 0,375756922 | 0,15  | 0,77314251  | -0,42 | 0,570044827 |
| Ect2      | -2,05 | 0,018738684 | -2,5  | 0,0802723   | 2,62  | 0,135162693 | 3,85  | 0,017169963 | 0,12  | 0,958856121 |
| Ect2l     | 0,14  | 0,775296013 | -0,21 | 0,6817338   | -0,2  | 0,714109192 | 0,2   | 0,620521302 | -0,03 | 0,973382116 |
| Eda       | -0,47 | 0,511327214 | -0,01 | 0,994137877 | 0,02  | 0,990836784 | -0,29 | 0,747537506 | -0,17 | 0,948163009 |
| Eda2r     | 0,53  | 0,701414945 | -0,55 | 0,459417799 | 0,77  | 0,377997279 | 2     | 0,012879019 | 0,49  | 0,399414645 |
| Edar      | -0,05 | 0,944291635 | -0,47 | 0,300832923 | 0,24  | 0,756730031 | -0,03 | 0,957656518 | -0,01 | 0,990448047 |
| Edaradd   | -0,45 | 0,596773791 | 0,57  | 0,664787536 | 0,07  | 0,93127773  | -0,04 | 0,972656417 | 0,12  | 0,91314596  |
| Edc3      | -0,76 | 0,119534183 | 0,3   | 0,49761736  | -0,65 | 0,342219539 | -1,09 | 0,019624978 | -0,73 | 0,18003283  |
| Edc4      | -0,27 | 0,692856018 | -0,2  | 0,792290003 | 0,29  | 0,686325978 | -0,1  | 0,882478591 | -0,23 | 0,789176573 |
| Eddm3b    | 0,01  | 0,991216662 | 0,19  | 0,695823136 | -0,01 | 0,994076654 | -0,08 | 0,834439251 | -0,03 | 0,975986697 |
| Edem1     | 0,06  | 0,898572877 | 0,15  | 0,721114342 | 0,35  | 0,665727181 | 0,97  | 0,031355191 | 0,08  | 0,914498972 |
| Edem2     | 0,01  | 0,990894139 | 0,05  | 0,940269529 | -0,07 | 0,939002241 | -0,19 | 0,722185959 | -0,69 | 0,278240482 |
| Edem3     | 0,24  | 0,631796741 | 0,03  | 0,981758111 | 0,15  | 0,857466061 | 0,5   | 0,353503596 | 0,17  | 0,830013971 |
| Edil3     | -0,65 | 0,298607461 | 0,14  | 0,929692416 | -0,61 | 0,35180566  | -3,93 | 0,017534652 | -1    | 0,356465925 |
| Edn1      | -0,7  | 0,156998083 | -0,16 | 0,882345297 | -0,26 | 0,86185852  | -0,58 | 0,418017948 | -0,42 | 0,587105866 |
| Edn2      | 0,09  | 0,912510949 | -0,07 | 0,93163271  | 0     | 0,999931921 | 0,07  | 0,922275195 | 0,14  | 0,887719506 |
| Edn3      | 0,19  | 0,630905267 | -0,07 | 0,940046211 | -0,12 | 0,840187016 | -0,63 | 0,161548806 | -0,24 | 0,721825544 |
| Ednra     | 0,07  | 0,975940973 | 1,15  | 0,359483031 | 0,41  | 0,6609968   | -1,31 | 0,190726804 | -1,1  | 0,290610657 |
| Ednrb     | -1,13 | 0,277692472 | -0,8  | 0,268720269 | 0,57  | 0,39810038  | -2,68 | 0,009490252 | -0,51 | 0,419249952 |
| Edrf1     | 0,17  | 0,882500171 | 0,09  | 0,926157704 | -0,11 | 0,899144679 | -0,03 | 0,957573971 | -0,05 | 0,954657649 |
| Eea1      | 0,38  | 0,389763388 | 0,55  | 0,301256005 | -0,02 | 0,988806417 | -0,69 | 0,093603361 | 0,64  | 0,224132358 |
| Eed       | -0,2  | 0,728608769 | 0,14  | 0,812664394 | 0,43  | 0,385794091 | 0,35  | 0,526586186 | 0,16  | 0,845218636 |
| Eef1a2    | -0,25 | 0,78682706  | -0,17 | 0,722938629 | 0,29  | 0,598076555 | 0,28  | 0,62296101  | 0,15  | 0,862182983 |
| Eef1akmt1 | -0,31 | 0,785400637 | -1,01 | 0,133143525 | 0,11  | 0,922126163 | 1,23  | 0,140538478 | -0,73 | 0,364736932 |
| Eef1b2    | 0     | 0,997205466 | 0,08  | 0,88928164  | 0,14  | 0,82162081  | 0,67  | 0,100992432 | 0,23  | 0,697818445 |
| Eef1d     | -0,32 | 0,451211285 | -0,34 | 0,564634931 | 0,6   | 0,214702327 | 0,3   | 0,381877273 | 0,12  | 0,859009237 |
| Eef1e1    | -0,05 | 0,967226721 | -0,15 | 0,869734155 | 0,15  | 0,875774755 | 0,83  | 0,383221502 | 0,4   | 0,731865047 |
| Eef1g     | -0,17 | 0,74140155  | 0     | 0,999210601 | 0,11  | 0,889881053 | 0,41  | 0,254444179 | 0,05  | 0,950211199 |
| Eef2      | -0,17 | 0,673291416 | 0,16  | 0,716445657 | -0,04 | 0,955984004 | 0,45  | 0,203853314 | 0,11  | 0,881943508 |
| Eef2k     | -0,06 | 0,936647701 | -0,22 | 0,738984063 | 0,04  | 0,973186233 | -0,43 | 0,346495732 | -0,7  | 0,395174487 |
| Eef2kmt   | -0,43 | 0,468767852 | -0,29 | 0,688641724 | 0,01  | 0,993379272 | -0,05 | 0,95354796  | -0,18 | 0,826088185 |
| Eefsec    | -0,13 | 0,836643643 | -0,58 | 0,493580894 | 0,89  | 0,087990365 | 0,38  | 0,471397735 | -0,29 | 0,62581066  |
| Eepd1     | -0,39 | 0,613990129 | -0,23 | 0,874250001 | 0,13  | 0,898935616 | -0,64 | 0,432678238 | -0,39 | 0,480219093 |
| Efcab1    | 0,16  | 0,853321681 | 0,06  | 0,936937668 | -0,17 | 0,777417583 | -0,11 | 0,873610553 | -0,39 | 0,588709129 |

|         |       |             |       |             |       |             |       |             |       |             |
|---------|-------|-------------|-------|-------------|-------|-------------|-------|-------------|-------|-------------|
| Efcab10 | 0,11  | 0,903817676 | 0,22  | 0,735639501 | -0,35 | 0,616978696 | -0,29 | 0,738406742 | -0,45 | 0,504952556 |
| Efcab11 | -0,99 | 0,148685247 | -0,73 | 0,614530823 | 0,33  | 0,702423238 | 0,67  | 0,680951303 | -0,73 | 0,603339054 |
| Efcab12 | 0,11  | 0,881663401 | -0,57 | 0,50179538  | 0,23  | 0,714346477 | -0,13 | 0,911253055 | -0,37 | 0,726563756 |
| Efcab14 | 0,12  | 0,826699935 | 0,18  | 0,764406705 | 0,01  | 0,997268369 | -0,7  | 0,09364188  | -0,06 | 0,950267521 |
| Efcab2  | -0,97 | 0,270816598 | 0,29  | 0,841007084 | -0,56 | 0,720069267 | -1,13 | 0,062839484 | 0,54  | 0,456564217 |
| Efcab3  | 0,07  | 0,925019201 | 0,08  | 0,89518658  | -0,14 | 0,82622365  | -0,4  | 0,263438608 | -0,11 | 0,872290451 |
| Efcab5  | 0,04  | 0,966363948 | 0,48  | 0,548214384 | -0,4  | 0,432912125 | -0,25 | 0,789717483 | -0,32 | 0,765419939 |
| Efcab6  | 0,15  | 0,769138738 | -0,07 | 0,9152526   | -0,15 | 0,82000536  | -0,07 | 0,900662145 | -0,04 | 0,977236465 |
| Efcab7  | 0,85  | 0,540296693 | -0,17 | 0,926157704 | 0,25  | 0,901816517 | 0,45  | 0,74417234  | 0,19  | 0,895402606 |
| Efcab8  | 0,54  | 0,567790521 | -0,14 | 0,938233008 | -0,51 | 0,321761132 | 0,21  | 0,713470521 | 0,13  | 0,926514899 |
| Efcab9  | -0,09 | 0,926014113 | 0,39  | 0,678357594 | 0,42  | 0,599648113 | -0,51 | 0,391327185 | -0,1  | 0,956755884 |
| Efcc1   | -0,19 | 0,791295946 | -0,24 | 0,671319666 | 0,26  | 0,714376082 | 0,66  | 0,332258645 | 0,05  | 0,974033555 |
| Efemp1  | -1,58 | 0,051263109 | -0,93 | 0,279445251 | 1,14  | 0,487848717 | 0,76  | 0,126023281 | 0,39  | 0,864163536 |
| Efemp2  | -0,29 | 0,757032046 | -0,33 | 0,574343122 | 1,1   | 0,123925526 | -0,55 | 0,475923384 | -0,58 | 0,502903447 |
| Efhb    | -0,09 | 0,953499784 | -0,51 | 0,702406882 | 0,87  | 0,384641418 | 0,68  | 0,316697742 | 0,07  | 0,940438527 |
| Efhc1   | 0,04  | 0,972112267 | 0,92  | 0,298195849 | -0,24 | 0,819509208 | 0,5   | 0,768036061 | 0,15  | 0,949178165 |
| Efhc2   | -0,44 | 0,460231397 | -0,16 | 0,88741189  | -0,19 | 0,819509208 | -1,45 | 0,490749995 | -0,45 | 0,891011128 |
| Efhd1   | 0,43  | 0,7987021   | -0,54 | 0,771806358 | 0,77  | 0,262241606 | -2,97 | 0,018003209 | -0,43 | 0,520240481 |
| Efhd2   | 0,15  | 0,800023642 | 0,33  | 0,532983509 | 0,2   | 0,791940256 | 1,33  | 0,093603361 | 0,51  | 0,585244465 |
| Efl1    | -0,3  | 0,473648333 | -0,02 | 0,969562508 | 0,06  | 0,952366216 | 0,96  | 0,074454367 | 0,1   | 0,91314596  |
| Efna1   | -0,43 | 0,24436535  | -0,52 | 0,19876663  | 0,22  | 0,706831845 | 0,02  | 0,981203009 | -0,47 | 0,378852259 |
| Efna2   | 0,24  | 0,754298754 | -0,1  | 0,825210924 | 0,75  | 0,370399672 | -0,39 | 0,782526829 | -0,35 | 0,738260196 |
| Efna3   | -0,36 | 0,692490424 | -0,08 | 0,956504634 | 0,31  | 0,599202081 | -1,19 | 0,39527702  | 0,12  | 0,953297732 |
| Efna4   | 0,34  | 0,55640978  | -0,43 | 0,551002019 | 0,62  | 0,189460036 | -0,37 | 0,278980491 | -0,07 | 0,932846086 |
| Efna5   | 0,17  | 0,7987021   | 0,77  | 0,327968427 | -0,25 | 0,883173062 | -1,43 | 0,159593558 | -0,3  | 0,777805633 |
| Efnb1   | -0,52 | 0,362152388 | 0,18  | 0,758387553 | 0,15  | 0,839096359 | -1,84 | 0,030492586 | 0,14  | 0,88521617  |
| Efnb2   | -0,76 | 0,172202025 | -0,87 | 0,087315688 | 0,53  | 0,502479932 | 0,13  | 0,818711104 | -0,3  | 0,649832285 |
| Efnb3   | -0,6  | 0,323672393 | -0,56 | 0,275147283 | 0,12  | 0,85952125  | -0,22 | 0,743170266 | -0,37 | 0,571139447 |
| Efr3a   | -0,02 | 0,988682409 | -0,44 | 0,786394409 | -0,36 | 0,464354581 | 0,84  | 0,362337687 | 1,46  | 0,091661588 |
| Efr3b   | -0,93 | 0,244269955 | -0,35 | 0,668764344 | 0,29  | 0,668633375 | -0,27 | 0,648210507 | -0,36 | 0,639071244 |
| Efs     | -0,16 | 0,79795086  | 0,54  | 0,278438834 | -0,3  | 0,5927133   | -0,06 | 0,875710696 | 0,31  | 0,54819971  |
| Eftud2  | -0,23 | 0,627959236 | -0,37 | 0,601885796 | 0,86  | 0,320344505 | 0,67  | 0,06054789  | -0,43 | 0,428751049 |
| Egf     | -0,24 | 0,728739942 | -0,2  | 0,831404974 | -0,01 | 0,991107468 | -0,71 | 0,283155128 | 0     | 0,998332822 |
| Egfbp2  | -0,08 | 0,909477787 | 0,03  | 0,980588989 | -0,07 | 0,940489823 | 0,13  | 0,859859031 | 0,15  | 0,879075155 |
| Egfem1  | 0,18  | 0,744748605 | -0,11 | 0,859954464 | -0,36 | 0,565399055 | 0,5   | 0,434844947 | 0,45  | 0,635195583 |

|         |       |             |       |             |       |             |       |             |       |             |
|---------|-------|-------------|-------|-------------|-------|-------------|-------|-------------|-------|-------------|
| Egfl6   | 0,42  | 0,501390979 | -0,02 | 0,992929085 | -0,34 | 0,607689093 | -0,18 | 0,800853287 | -0,14 | 0,884247878 |
| Egfl7   | -0,11 | 0,80746414  | 0,08  | 0,880110005 | -0,18 | 0,723896318 | -0,04 | 0,957573971 | 0,05  | 0,955847344 |
| Egfl8   | -0,58 | 0,111767257 | 0,28  | 0,681418926 | 0,06  | 0,968677508 | -2,88 | 0,005494206 | -0,87 | 0,252960496 |
| Egflam  | -0,17 | 0,918804282 | 0,31  | 0,802979985 | 0,12  | 0,923350407 | -0,66 | 0,592045618 | -0,64 | 0,718299139 |
| Egfr    | -0,07 | 0,961332081 | 0,46  | 0,369917517 | 1,31  | 0,112229182 | 0,39  | 0,303816416 | 0,54  | 0,205792961 |
| Egfros  | -0,17 | 0,689253784 | -0,07 | 0,906267371 | 0,07  | 0,950725218 | 0,23  | 0,557292283 | -0,01 | 0,992980215 |
| Egln1   | 0,33  | 0,701627731 | 0,49  | 0,627230934 | -0,01 | 0,996322566 | 0,31  | 0,357285182 | -0,13 | 0,917710291 |
| Egln2   | 0,14  | 0,850952988 | -0,45 | 0,649611595 | 0,53  | 0,320972076 | 0,04  | 0,96648085  | 0,17  | 0,910301996 |
| Egln3   | 0,53  | 0,410773729 | -0,37 | 0,872672595 | 0,43  | 0,626880983 | 0,96  | 0,183183685 | 0,51  | 0,633449435 |
| Egr1    | 0,26  | 0,653980384 | 0,74  | 0,231499374 | -0,25 | 0,707571856 | -1,58 | 0,007919254 | -0,09 | 0,900483402 |
| Egr2    | -0,34 | 0,816616632 | 1,02  | 0,191605725 | 1,05  | 0,324321658 | -1,7  | 0,018999256 | 0,72  | 0,332430866 |
| Egr3    | 0,09  | 0,908281692 | 0,19  | 0,766425161 | 0,19  | 0,741865177 | -0,62 | 0,244720011 | 0,25  | 0,745574572 |
| Egr4    | -0,12 | 0,869565514 | 0,12  | 0,898495267 | 0,02  | 0,988395474 | -0,16 | 0,782250507 | 0,01  | 0,996410895 |
| Ehbp1   | -0,36 | 0,641393756 | -0,13 | 0,919873208 | -0,3  | 0,76370647  | 0,48  | 0,512902457 | 0,37  | 0,68987325  |
| Ehbp111 | -0,26 | 0,760872819 | -0,41 | 0,374771013 | -0,15 | 0,841669036 | -0,17 | 0,812468015 | 0,21  | 0,84970727  |
| Ehd1    | -0,02 | 0,981400637 | 0,18  | 0,673912079 | 0,06  | 0,930223445 | -0,05 | 0,938450937 | -0,18 | 0,827018719 |
| Ehd2    | -0,66 | 0,270838849 | -0,4  | 0,594415097 | 0,75  | 0,398303268 | 0,68  | 0,132238421 | -0,1  | 0,905758282 |
| Ehd3    | -0,06 | 0,925510521 | -0,03 | 0,98230594  | -0,22 | 0,823890116 | -0,34 | 0,78481967  | -0,78 | 0,45160806  |
| Ehd4    | -0,12 | 0,809510678 | 0,32  | 0,39895979  | -0,52 | 0,328356954 | -0,22 | 0,479656235 | 0,17  | 0,763240477 |
| Ehf     | -0,06 | 0,949236157 | -0,35 | 0,625326081 | -0,12 | 0,923248239 | -0,72 | 0,224335521 | -0,86 | 0,158575013 |
| Ehhadh  | 0     | 1           | 0     | 0,999210601 | -0,5  | 0,660920525 | -0,23 | 0,740510034 | 0,52  | 0,450543672 |
| Ehmt1   | -0,39 | 0,697992827 | -0,42 | 0,428913843 | -0,08 | 0,955761087 | 0,38  | 0,432124032 | 0,23  | 0,765327693 |
| Ehmt2   | 0,01  | 0,993728727 | 0,02  | 0,982786635 | 0,22  | 0,662451176 | 0,04  | 0,959105354 | -0,19 | 0,826379382 |
| Ei24    | -0,51 | 0,239601221 | -0,29 | 0,671319666 | 0,16  | 0,904057901 | -0,2  | 0,695232035 | -0,53 | 0,324093515 |
| Eid1    | -0,17 | 0,732684039 | 0,76  | 0,311904351 | -0,37 | 0,495563923 | 0,77  | 0,227822618 | 1,01  | 0,12854282  |
| Eid2    | -0,43 | 0,384125436 | -0,23 | 0,691433995 | -0,1  | 0,917694073 | -0,1  | 0,858484804 | -0,24 | 0,752873495 |
| Eid2b   | -0,69 | 0,334676974 | 0,4   | 0,576723643 | -0,16 | 0,831656622 | -0,03 | 0,981706816 | 0,01  | 0,992370267 |
| Eid3    | 0,58  | 0,294021103 | 0,1   | 0,917876303 | -0,51 | 0,566351122 | 0,05  | 0,980947421 | 0,7   | 0,668747774 |
| Eif1    | 0,13  | 0,766541178 | 0,16  | 0,765358146 | -0,07 | 0,94110925  | -0,05 | 0,915888138 | 0,31  | 0,525018839 |
| Eif1a   | 0,22  | 0,657124524 | 0,21  | 0,697121392 | 0,02  | 0,989923808 | -0,01 | 0,987478998 | 0,49  | 0,298623139 |
| Eif1ad  | -0,25 | 0,472993837 | -0,24 | 0,572250784 | -0,07 | 0,956894731 | 0,88  | 0,162502431 | 0,28  | 0,731865047 |
| Eif1ax  | -0,72 | 0,156172317 | -0,38 | 0,65041955  | -0,31 | 0,608989036 | 0,56  | 0,239185309 | -0,2  | 0,817326467 |
| Eif1b   | -0,19 | 0,869367353 | -0,15 | 0,906284999 | -0,58 | 0,575554281 | -0,25 | 0,603611964 | 0,16  | 0,880134862 |
| Eif2a   | -0,5  | 0,500597481 | 0,05  | 0,966132962 | 0,33  | 0,460914763 | -0,27 | 0,748834688 | 0,15  | 0,884645434 |
| Eif2ak1 | -0,29 | 0,771117787 | -0,01 | 0,997900901 | 0,66  | 0,435916963 | 0,54  | 0,486579476 | 0,13  | 0,904636459 |

|          |       |             |       |             |       |             |       |             |       |             |
|----------|-------|-------------|-------|-------------|-------|-------------|-------|-------------|-------|-------------|
| Eif2ak2  | 0,09  | 0,889132203 | 0,75  | 0,374985192 | -1,15 | 0,200719786 | 0,68  | 0,321184055 | 1,96  | 0,005696424 |
| Eif2ak3  | -0,79 | 0,296031134 | -0,99 | 0,154145842 | 1,17  | 0,076696168 | 0,58  | 0,092367127 | 0,05  | 0,951646452 |
| Eif2ak4  | 0,17  | 0,837953479 | -0,25 | 0,577794536 | 0     | 0,999329448 | 0,29  | 0,52635681  | -0,61 | 0,280883929 |
| Eif2b1   | -0,54 | 0,189684245 | -0,75 | 0,265851266 | 0,75  | 0,389611697 | 0,71  | 0,076831537 | -0,51 | 0,288665356 |
| Eif2b2   | 0,12  | 0,781671022 | -0,09 | 0,904698551 | 0,17  | 0,862892093 | 1,47  | 0,023550607 | -0,14 | 0,860923432 |
| Eif2b3   | -0,54 | 0,437618775 | -0,84 | 0,377007015 | 0,25  | 0,804821595 | 0,96  | 0,17138908  | -0,55 | 0,567170431 |
| Eif2b4   | -0,18 | 0,802427928 | 0,13  | 0,894400782 | -0,39 | 0,529853952 | 0,57  | 0,466586615 | 0,33  | 0,746969993 |
| Eif2b5   | -0,47 | 0,239601221 | -0,26 | 0,492900462 | 0,91  | 0,11242127  | 0,53  | 0,575297022 | -0,09 | 0,955137605 |
| Eif2c5   | 0,16  | 0,785491059 | -0,02 | 0,989873399 | 0,38  | 0,542758274 | 0,08  | 0,948271051 | 0,09  | 0,939948423 |
| Eif2d    | -0,01 | 0,987965359 | -0,12 | 0,847821325 | 0,54  | 0,404404953 | 0,28  | 0,779547737 | -0,4  | 0,708051749 |
| Eif2s1   | -0,58 | 0,371554727 | -0,53 | 0,487451484 | 0,21  | 0,859484164 | 1,08  | 0,092863116 | 0,36  | 0,603288759 |
| Eif2s2   | 0,15  | 0,902628825 | -0,48 | 0,531518093 | 0,73  | 0,510706849 | 0,48  | 0,554031892 | -0,16 | 0,904836805 |
| Eif2s3y  | 0,86  | 0,241021853 | 0,53  | 0,614623927 | 0,09  | 0,903942509 | 0,12  | 0,838828457 | 0,26  | 0,755576335 |
| Eif3a    | 0,1   | 0,829299665 | 0,08  | 0,904671921 | -0,06 | 0,955586257 | 0,6   | 0,097710906 | 0,54  | 0,218199508 |
| Eif3b    | -0,73 | 0,074890017 | -0,22 | 0,627164993 | 0,61  | 0,198762674 | 0,68  | 0,078120606 | -0,15 | 0,836061657 |
| Eif3c    | 0,07  | 0,903268859 | -0,22 | 0,641804702 | 0,35  | 0,487799104 | 0,73  | 0,198588453 | 0,12  | 0,903863447 |
| Eif3d    | 0,02  | 0,981777139 | -0,13 | 0,835533307 | 0,29  | 0,650169259 | 0,35  | 0,390823877 | -0,22 | 0,724669859 |
| Eif3e    | 0,03  | 0,953675344 | 0,1   | 0,820132532 | 0,21  | 0,897932497 | 0,72  | 0,111635568 | 0,35  | 0,549399334 |
| Eif3f    | -0,03 | 0,956284384 | 0,14  | 0,809863317 | -0,26 | 0,727548313 | 0,39  | 0,600412927 | -0,05 | 0,968130547 |
| Eif3g    | -0,26 | 0,661945783 | -0,61 | 0,230022325 | 0,68  | 0,342313446 | 0,39  | 0,308308908 | -0,03 | 0,972590168 |
| Eif3h    | 0,07  | 0,886889675 | 0,09  | 0,862998751 | 0,16  | 0,731438246 | 0,25  | 0,502230334 | -0,08 | 0,918797466 |
| Eif3i    | -0,15 | 0,797113928 | -0,23 | 0,626762331 | 0,54  | 0,479168256 | 0,53  | 0,241372443 | -0,15 | 0,843351909 |
| Eif3j2   | -0,09 | 0,845437504 | 0,04  | 0,947915895 | 0,29  | 0,689225406 | 0,25  | 0,665234661 | 0,32  | 0,643382128 |
| Eif3k    | 0,32  | 0,414844288 | 0,17  | 0,672509572 | -0,31 | 0,616398569 | 0,45  | 0,381407171 | 0,17  | 0,838679773 |
| Eif3l    | -0,49 | 0,357233557 | -0,38 | 0,561842393 | 0,13  | 0,898305096 | 0,72  | 0,255482953 | -0,11 | 0,91795047  |
| Eif3m    | 0,18  | 0,717502566 | -0,15 | 0,771641267 | 0,1   | 0,924910686 | 0,5   | 0,149519451 | 0,22  | 0,692178867 |
| Eif4a1   | -0,32 | 0,392900129 | -0,24 | 0,636808086 | 0,34  | 0,448171046 | 0,79  | 0,05745194  | 0,12  | 0,863544853 |
| Eif4a2   | -0,03 | 0,964216121 | 0,37  | 0,624860312 | -0,76 | 0,199071989 | -1,06 | 0,041009258 | 0,4   | 0,414033358 |
| Eif4a3   | 0,1   | 0,922118639 | -0,51 | 0,792112243 | 1,01  | 0,299010171 | 0,51  | 0,383221502 | -0,48 | 0,643241856 |
| Eif4b    | -0,2  | 0,617093929 | 0,19  | 0,7671393   | 0,01  | 0,993379272 | 0,26  | 0,671971677 | -0,01 | 0,9939542   |
| Eif4e    | 0,23  | 0,717603132 | 0,1   | 0,848821789 | 0,06  | 0,939921221 | 0,81  | 0,168239148 | 0,45  | 0,528012527 |
| Eif4e1b  | -0,02 | 0,983184832 | 0,13  | 0,847821325 | -0,02 | 0,989772079 | 0,29  | 0,452631406 | 0,27  | 0,638868989 |
| Eif4e2   | -0,01 | 0,992748202 | 0,24  | 0,716668427 | 0,41  | 0,647047222 | -0,18 | 0,89175338  | -0,19 | 0,907903208 |
| Eif4e3   | 1,03  | 0,165137501 | 1,22  | 0,109267475 | -1    | 0,06880013  | 0,78  | 0,082933713 | 1,71  | 0,006269121 |
| Eif4ebp1 | 0,27  | 0,58112831  | 0,05  | 0,938944149 | -0,28 | 0,688643408 | 2,02  | 0,005494861 | 0,47  | 0,362462346 |



|           |       |             |       |             |       |             |       |             |       |             |
|-----------|-------|-------------|-------|-------------|-------|-------------|-------|-------------|-------|-------------|
| Eif4ebp2  | -0,51 | 0,305893528 | -0,53 | 0,595287483 | 0,52  | 0,470938481 | -0,11 | 0,818849811 | -0,17 | 0,843846988 |
| Eif4ebp3  | 0     | 1           | 0,15  | 0,922703368 | 0,09  | 0,965539887 | 0,04  | 0,984136649 | 0,32  | 0,819072786 |
| Eif4enif1 | -0,22 | 0,593540946 | 0,02  | 0,989720835 | 0,12  | 0,859517858 | 0,13  | 0,84279206  | 0,04  | 0,961749007 |
| Eif4g1    | -0,24 | 0,532948347 | -0,26 | 0,549517801 | 0,49  | 0,197579894 | 0,79  | 0,076147977 | -0,15 | 0,835191    |
| Eif4g2    | -0,21 | 0,570769939 | -0,13 | 0,747707816 | 0,03  | 0,964352611 | 0,22  | 0,551075294 | 0,01  | 0,991628025 |
| Eif4g3    | -0,15 | 0,769446581 | -0,12 | 0,85597055  | 0,13  | 0,853753298 | 0,61  | 0,142462049 | 0,09  | 0,904636459 |
| Eif4h     | -0,15 | 0,690560567 | 0,02  | 0,979494349 | 0,16  | 0,761861872 | 0,1   | 0,85301747  | 0,1   | 0,889518182 |
| Eif5      | 0,38  | 0,359305883 | 0,14  | 0,728224948 | -0,1  | 0,899171797 | -0,16 | 0,830728588 | 0,65  | 0,332695011 |
| Eif5a     | 0,04  | 0,946472896 | 0,26  | 0,628442147 | -0,05 | 0,947661458 | 0,64  | 0,13506413  | 0,56  | 0,271967431 |
| Eif5a2    | -0,15 | 0,923749064 | -0,14 | 0,943587641 | 0,26  | 0,911205034 | 2,06  | 0,11232717  | 0,3   | 0,927536545 |
| Eif5b     | -0,11 | 0,80548452  | -0,32 | 0,51825831  | 0,51  | 0,299010171 | 0,98  | 0,058105959 | 0,34  | 0,573405587 |
| Eif6      | -0,06 | 0,930134702 | -0,07 | 0,891749049 | 0,68  | 0,169619185 | 0,71  | 0,163529439 | 0,17  | 0,829444633 |
| Elac1     | 0,26  | 0,608742569 | 0,03  | 0,973945454 | -0,44 | 0,533023142 | -0,27 | 0,56246056  | 0,62  | 0,319597889 |
| Elac2     | -0,74 | 0,239601221 | -0,54 | 0,318079221 | -0,07 | 0,963199274 | 0,33  | 0,519126134 | -0,37 | 0,55740133  |
| Elane     | -0,1  | 0,888962766 | 0,02  | 0,982476647 | -0,07 | 0,925417014 | -0,13 | 0,792979476 | 0,01  | 0,989016067 |
| Elavl1    | -0,27 | 0,600313897 | -0,17 | 0,701043773 | 0,26  | 0,607318275 | 0,69  | 0,450011061 | 0,32  | 0,775482866 |
| Elavl2    | -0,05 | 0,964272364 | 0,1   | 0,966078321 | -0,27 | 0,799586974 | -0,14 | 0,873812847 | -0,09 | 0,937558003 |
| Elavl3    | -0,02 | 0,986829217 | 0,43  | 0,527287574 | 0,19  | 0,840990722 | -0,67 | 0,266763043 | -0,22 | 0,871038748 |
| Elavl4    | 0,25  | 0,640398414 | -0,17 | 0,894174458 | -0,21 | 0,755825002 | 0,35  | 0,630066729 | 0,09  | 0,923816228 |
| Eldr      | -0,57 | 0,189736931 | -0,15 | 0,933320126 | 0,36  | 0,393592213 | 0,05  | 0,975655831 | -0,57 | 0,419018593 |
| Elf1      | 0,42  | 0,340269831 | 0,51  | 0,293635812 | -0,43 | 0,329511043 | -0,74 | 0,066697516 | 0,36  | 0,461765323 |
| Elf2      | -0,38 | 0,505859046 | 0,05  | 0,95291853  | -0,6  | 0,359711139 | -0,47 | 0,34938668  | -0,49 | 0,375162254 |
| Elf3      | 0,39  | 0,287296005 | -0,07 | 0,947684955 | 1,13  | 0,281455306 | -0,16 | 0,727197341 | 0     | 0,997438655 |
| Elf4      | -0,09 | 0,857594729 | -0,19 | 0,765370871 | 0,46  | 0,406440962 | 0,76  | 0,068963555 | 0,06  | 0,947739624 |
| Elf5      | 0,07  | 0,932061055 | -0,48 | 0,467853942 | -0,08 | 0,932706021 | 0,35  | 0,29360065  | 0,39  | 0,509450556 |
| Elfn1     | 0,2   | 0,738714467 | -0,36 | 0,487843882 | -0,29 | 0,591404136 | 0,26  | 0,601890448 | -0,05 | 0,961746463 |
| Elfn2     | -0,19 | 0,814888638 | -0,16 | 0,816131136 | 0,01  | 0,994530858 | 0,18  | 0,634935038 | -0,37 | 0,414033358 |
| Elk1      | 0,34  | 0,602568641 | 0,23  | 0,785153081 | -0,01 | 0,990699622 | -0,06 | 0,955802555 | 0,33  | 0,679443551 |
| Elk3      | -0,36 | 0,301226191 | -0,57 | 0,255730657 | -0,26 | 0,744387748 | -0,26 | 0,530988845 | -0,47 | 0,402175692 |
| Elk4      | -0,06 | 0,925510521 | 0,07  | 0,924916733 | 0,05  | 0,96411779  | -0,37 | 0,271443163 | -0,02 | 0,980961333 |
| Eli       | -0,07 | 0,949879775 | 0,03  | 0,975959817 | 0,01  | 0,991018097 | -0,02 | 0,984332229 | -0,26 | 0,730298091 |
| Eli2      | 0,38  | 0,498560785 | 0,2   | 0,728434379 | -0,22 | 0,695930773 | 1,24  | 0,146784762 | 0,29  | 0,7899984   |
| Eli3      | 0,43  | 0,353539338 | -0,03 | 0,97875059  | 0,17  | 0,855058311 | 0,01  | 0,994512187 | -0,25 | 0,84597948  |
| Elmo1     | -0,15 | 0,816710776 | -0,34 | 0,407898733 | 0,34  | 0,606016246 | 0,34  | 0,539664524 | -0,58 | 0,376385479 |
| Elmo2     | 0,15  | 0,840227607 | 0,11  | 0,84954093  | -0,78 | 0,207033298 | -0,64 | 0,168522312 | 0,34  | 0,555315018 |

|         |       |             |       |             |       |             |       |             |       |             |
|---------|-------|-------------|-------|-------------|-------|-------------|-------|-------------|-------|-------------|
| Elmo3   | 0,38  | 0,625047645 | 1,13  | 0,176214568 | -0,01 | 0,994636606 | -0,94 | 0,161137645 | -0,04 | 0,977903513 |
| Elmod1  | 0,18  | 0,785669218 | -0,25 | 0,693906911 | -0,22 | 0,689058581 | -0,16 | 0,745447711 | -0,26 | 0,715672225 |
| Elmod2  | 0,09  | 0,858919962 | 0,7   | 0,360324171 | 0,83  | 0,291949275 | -0,77 | 0,475723155 | -0,04 | 0,984632256 |
| Elmod3  | 0,45  | 0,458091976 | 0,47  | 0,599471467 | 0,23  | 0,75200406  | -0,53 | 0,377338868 | -0,36 | 0,712121015 |
| Elmsan1 | -0,23 | 0,602160482 | 0,25  | 0,666450149 | -0,09 | 0,930977875 | -0,95 | 0,056057901 | -0,17 | 0,790424343 |
| Eln     | -0,44 | 0,452266722 | -0,29 | 0,688435265 | 0,36  | 0,59595639  | -3,06 | 0,004331967 | -2,06 | 0,004275249 |
| Elof1   | -0,5  | 0,233500023 | -0,18 | 0,789363581 | 0,24  | 0,650169259 | 0,36  | 0,309009063 | 0,33  | 0,781405349 |
| Elovl1  | -0,13 | 0,892141122 | 0,1   | 0,902148738 | 0,71  | 0,323989114 | 0,51  | 0,722467708 | 0,58  | 0,679932345 |
| Elovl2  | -0,21 | 0,861963717 | 0,41  | 0,431022747 | 0,06  | 0,970969012 | -0,59 | 0,168967728 | 0,3   | 0,716979399 |
| Elovl3  | 0,4   | 0,34052888  | -0,21 | 0,738762579 | 0,02  | 0,977290724 | 0,19  | 0,712869858 | -0,23 | 0,706234455 |
| Elovl4  | 0,14  | 0,778869381 | -0,01 | 0,995205602 | 0,12  | 0,863503599 | -0,19 | 0,699292828 | -0,25 | 0,695702232 |
| Elovl5  | -0,35 | 0,434674431 | -0,46 | 0,283876932 | -0,07 | 0,922318683 | -0,36 | 0,347557572 | -0,37 | 0,481762055 |
| Elovl6  | -1,56 | 0,13473547  | -0,96 | 0,272116352 | 2,26  | 0,012665201 | 2,36  | 0,062418461 | -0,51 | 0,823098095 |
| Elovl7  | 0,12  | 0,810208393 | 0,33  | 0,485712513 | 1,13  | 0,036818657 | -0,03 | 0,96857452  | 0,72  | 0,236565526 |
| Elp2    | -0,63 | 0,208520513 | -0,49 | 0,439108392 | 0,69  | 0,315946262 | 0,26  | 0,59879126  | -0,7  | 0,232692564 |
| Elp3    | -0,23 | 0,734646609 | -0,62 | 0,530808197 | 0,74  | 0,26430961  | 0,38  | 0,57749984  | -0,26 | 0,765809384 |
| Elp4    | -0,45 | 0,580909375 | -0,19 | 0,762968641 | 1,38  | 0,281168576 | 1,01  | 0,654903232 | 0,98  | 0,655657337 |
| Elp5    | 0,18  | 0,666820752 | 0,01  | 0,984812702 | 0,75  | 0,181578063 | 0,21  | 0,556717644 | -0,33 | 0,4940585   |
| Elp6    | 0,54  | 0,446811495 | 0,01  | 1           | 0,49  | 0,539667953 | 0,18  | 0,782438695 | 0,18  | 0,86809582  |
| Emb     | 0,07  | 0,966769047 | -0,44 | 0,808498635 | -1,97 | 0,294163114 | 1,65  | 0,15661377  | 0,98  | 0,230954385 |
| Emc1    | -0,45 | 0,385512506 | -0,43 | 0,311719407 | 0,93  | 0,091628027 | -0,01 | 0,992183086 | -0,58 | 0,249774523 |
| Emc10   | -0,28 | 0,472544689 | -0,2  | 0,666450149 | 0,97  | 0,119299768 | -0,12 | 0,743625096 | -0,46 | 0,321751898 |
| Emc2    | -0,03 | 0,971406612 | -0,16 | 0,708684603 | -0,13 | 0,911601881 | -0,43 | 0,414522125 | -0,05 | 0,966951657 |
| Emc3    | -0,08 | 0,866989155 | 0,09  | 0,90164068  | 0,66  | 0,321560439 | -0,39 | 0,301516971 | -0,15 | 0,825311688 |
| Emc4    | 0,06  | 0,922591969 | -0,05 | 0,946885634 | 0,35  | 0,598179126 | 0,13  | 0,779547737 | -0,1  | 0,891011128 |
| Emc6    | -0,48 | 0,340495894 | 0,01  | 0,993789602 | -0,17 | 0,829285065 | 0,47  | 0,435922496 | -0,03 | 0,970154126 |
| Emc7    | -0,03 | 0,963914207 | -0,1  | 0,857880695 | 0,29  | 0,777568498 | -0,31 | 0,35179619  | -0,05 | 0,948163009 |
| Emc8    | -0,19 | 0,730419898 | -0,28 | 0,50179538  | 0,06  | 0,961464515 | 0,34  | 0,530913165 | 0,11  | 0,927536545 |
| Emc9    | -0,01 | 0,993728727 | -0,08 | 0,948314657 | 0,55  | 0,638965268 | -0,65 | 0,237768931 | -0,67 | 0,397520359 |
| Emcn    | -0,24 | 0,522710796 | -0,33 | 0,518494408 | 0,27  | 0,586616921 | -0,57 | 0,085369647 | -0,55 | 0,279661817 |
| Emd     | -0,28 | 0,470166881 | -0,17 | 0,783325809 | 0,69  | 0,321560439 | 0,45  | 0,24812886  | 0,13  | 0,843199194 |
| Eme1    | -0,37 | 0,559760851 | -0,75 | 0,469845897 | -0,11 | 0,905233024 | 1,05  | 0,140538478 | 0,24  | 0,826206511 |
| Eme2    | 0,1   | 0,943776441 | -0,3  | 0,748345069 | -0,4  | 0,578572575 | 0,12  | 0,891810252 | 0,22  | 0,822081068 |
| Emg1    | 0,1   | 0,895400682 | -0,37 | 0,508633526 | 0,02  | 0,988753033 | 0,42  | 0,286814341 | 0,27  | 0,635894676 |
| Emid1   | -0,97 | 0,159459553 | -0,66 | 0,413257291 | 0,18  | 0,899941244 | -0,41 | 0,492413033 | -0,82 | 0,214056891 |

|         |       |             |       |             |       |             |       |             |       |             |
|---------|-------|-------------|-------|-------------|-------|-------------|-------|-------------|-------|-------------|
| Emilin1 | -0,47 | 0,221240269 | -0,12 | 0,808942942 | 0,64  | 0,321560439 | 0,02  | 0,972244785 | -0,68 | 0,244007864 |
| Emilin2 | 0,35  | 0,632420805 | 0,11  | 0,901000778 | 0,36  | 0,588879542 | 0,4   | 0,639359737 | -0,15 | 0,904040121 |
| Emilin3 | -0,02 | 0,983516046 | 0,01  | 0,996259587 | 0,34  | 0,501664412 | 0,24  | 0,483157344 | -0,37 | 0,478324516 |
| Eml1    | -0,12 | 0,892124736 | -0,41 | 0,740618526 | 0,33  | 0,838289412 | -0,03 | 0,978325445 | 0,12  | 0,895388407 |
| Eml2    | 0,11  | 0,926692467 | 0,41  | 0,705845461 | 0,39  | 0,512995479 | -0,22 | 0,677607825 | -0,65 | 0,264122193 |
| Eml3    | -0,32 | 0,414026998 | -0,12 | 0,927323556 | 0,36  | 0,500343254 | 0,23  | 0,528059421 | 0,18  | 0,789332757 |
| Eml4    | -0,55 | 0,206710797 | -0,3  | 0,747649252 | 0,5   | 0,459958617 | 0,02  | 0,976376162 | -0,46 | 0,536683014 |
| Eml5    | 0,28  | 0,761120978 | -0,49 | 0,536246395 | 0,67  | 0,308611269 | 0,14  | 0,863755798 | 0,01  | 0,993454701 |
| Eml6    | 0,04  | 0,962660554 | 0,55  | 0,483998954 | 0,15  | 0,84847388  | -1,43 | 0,059804447 | -0,74 | 0,270231524 |
| Emp1    | -0,1  | 0,836158068 | 0,24  | 0,578047349 | -0,2  | 0,751990502 | -0,38 | 0,271252298 | -0,18 | 0,766559546 |
| Emp2    | -0,09 | 0,870052902 | 0,61  | 0,152328045 | -0,12 | 0,919116989 | -0,07 | 0,879612976 | -0,45 | 0,438956045 |
| Emp3    | -0,46 | 0,321600657 | -0,34 | 0,51825831  | 0,01  | 0,993071391 | -1,71 | 0,012628389 | -0,4  | 0,46663731  |
| Emsy    | -0,08 | 0,88381182  | -0,27 | 0,613449608 | 0,05  | 0,950846671 | -0,29 | 0,454232315 | 0,06  | 0,952753183 |
| Emx1    | 0,18  | 0,805603729 | -0,15 | 0,806715517 | 0,26  | 0,674253263 | -0,1  | 0,880043745 | -0,02 | 0,983469081 |
| Emx2    | 0,91  | 0,190455459 | 0,15  | 0,817110093 | -0,16 | 0,860939872 | 0,41  | 0,450450069 | 0,21  | 0,807725933 |
| Emx2os  | 0,15  | 0,810822259 | 0,08  | 0,904671921 | -0,35 | 0,536712236 | 0,11  | 0,780675133 | -0,02 | 0,982175252 |
| En1     | 0,23  | 0,751534367 | -0,32 | 0,725783826 | 0,19  | 0,721083003 | 0,19  | 0,675957143 | 0,41  | 0,600332767 |
| En2     | 0,09  | 0,886889675 | 0,1   | 0,925583763 | 0,2   | 0,819225502 | 0,33  | 0,520506543 | 0,31  | 0,649849091 |
| Enah    | 0,82  | 0,149941264 | 1,11  | 0,297250343 | -0,81 | 0,323517263 | 1,16  | 0,15999424  | 0     | 0,999595686 |
| Enam    | 0,32  | 0,573267041 | 0,29  | 0,775914311 | -0,22 | 0,692591179 | 0,2   | 0,723990427 | 0,07  | 0,95587699  |
| Enc1    | 1,31  | 0,157853388 | 1,25  | 0,087315688 | -1,6  | 0,008643944 | 1,47  | 0,055887424 | 1,43  | 0,048627677 |
| Endod1  | 0,11  | 0,883674476 | 0,12  | 0,880973038 | -0,01 | 0,993379272 | 0,29  | 0,334262614 | -0,01 | 0,991206114 |
| Endog   | -0,34 | 0,711625447 | -0,08 | 0,866918678 | 0,9   | 0,14251251  | -1,18 | 0,026967576 | -0,74 | 0,329248978 |
| Endou   | -0,26 | 0,825308689 | -0,4  | 0,821664771 | 0,57  | 0,225514917 | -1,58 | 0,03032795  | -0,24 | 0,675830386 |
| Endov   | 0,17  | 0,834672627 | -0,06 | 0,939419844 | -0,2  | 0,793123011 | -0,02 | 0,978558892 | -0,33 | 0,542802043 |
| Eng     | -0,26 | 0,541259525 | -0,28 | 0,494445434 | -0,08 | 0,906097666 | -0,5  | 0,151857581 | -0,54 | 0,225207841 |
| Engase  | -0,02 | 0,974740074 | 0,18  | 0,852461907 | -0,28 | 0,647006895 | -0,47 | 0,137098873 | -0,67 | 0,202369779 |
| Enho    | -0,22 | 0,615259942 | -0,49 | 0,318798133 | 0,23  | 0,786838878 | -0,2  | 0,69986269  | -0,38 | 0,554975763 |
| Enkd1   | -0,3  | 0,535827944 | -0,33 | 0,837071004 | 0,06  | 0,958851839 | 0,23  | 0,843512544 | -0,2  | 0,794253181 |
| Enkur   | -0,8  | 0,472739337 | -0,59 | 0,467443634 | 0,81  | 0,299010171 | 0,78  | 0,307744759 | -0,04 | 0,981439632 |
| Eno1b   | -0,16 | 0,733539045 | -0,01 | 0,994486533 | 0,11  | 0,855523214 | -0,14 | 0,728730534 | -0,17 | 0,810276195 |
| Eno2    | -0,17 | 0,8102165   | 0,57  | 0,568304052 | -0,03 | 0,982241391 | -0,78 | 0,39058196  | -0,65 | 0,517867057 |
| Eno3    | 0,43  | 0,662416763 | 0,11  | 0,911024505 | 0,67  | 0,218714399 | -0,66 | 0,219531889 | -0,16 | 0,84597948  |
| Eno4    | 0,08  | 0,897717279 | 0,18  | 0,912516873 | 0,1   | 0,903942509 | 0,28  | 0,682117361 | 0,25  | 0,801385411 |
| Enoph1  | -0,27 | 0,62872508  | -0,12 | 0,783325809 | -0,26 | 0,641764537 | 0,23  | 0,490176405 | -0,09 | 0,915356549 |

|            |       |             |       |             |       |             |       |             |       |             |
|------------|-------|-------------|-------|-------------|-------|-------------|-------|-------------|-------|-------------|
| Enox1      | -0,13 | 0,794063226 | -0,02 | 0,972546149 | -0,3  | 0,549895527 | -0,25 | 0,556282326 | 0,03  | 0,978579733 |
| Enox2      | -0,49 | 0,337609369 | -0,03 | 0,985764487 | 0,73  | 0,299010171 | -0,11 | 0,859834868 | -0,32 | 0,557628286 |
| Enpep      | 0,3   | 0,760032001 | 0,33  | 0,750273889 | 0,26  | 0,637896954 | -4,9  | 0,003009221 | -0,85 | 0,123547663 |
| Enpp1      | -0,31 | 0,874688734 | 0,41  | 0,810340604 | 0,96  | 0,134214641 | -1,38 | 0,129433069 | -0,27 | 0,825871709 |
| Enpp2      | -1,02 | 0,097625832 | 0,06  | 0,956049982 | 0,66  | 0,699337799 | -0,02 | 0,99017416  | 0,13  | 0,946219592 |
| Enpp3      | -0,73 | 0,137221178 | -0,54 | 0,417773656 | 0,91  | 0,326054745 | 0,13  | 0,793877243 | -0,78 | 0,431085955 |
| Enpp4      | 0,67  | 0,277333992 | 1,03  | 0,153524445 | -1,03 | 0,153783119 | -1,57 | 0,02248719  | 0,74  | 0,118887411 |
| Enpp5      | -0,04 | 0,966775766 | 0,42  | 0,487451484 | -0,68 | 0,377893891 | -2,19 | 0,027322602 | 0,5   | 0,545166604 |
| Enpp6      | -0,93 | 0,322835282 | 0,7   | 0,290322318 | 0,31  | 0,772397144 | -2,11 | 0,084028921 | -0,14 | 0,939127163 |
| Enpp7      | 0     | 0,997285684 | 0,15  | 0,839789639 | -0,02 | 0,989491273 | 0,11  | 0,928461371 | -0,1  | 0,943668392 |
| Ensa       | 0,28  | 0,698332739 | 0,11  | 0,904698551 | -0,16 | 0,853753298 | -1,09 | 0,119611023 | -0,43 | 0,61355523  |
| Enthd1     | -0,14 | 0,810208393 | -0,19 | 0,738984063 | -0,07 | 0,920828015 | 0,31  | 0,335352248 | 0,31  | 0,518337819 |
| Enthd2     | -0,36 | 0,463413237 | -0,13 | 0,906267371 | -0,38 | 0,666305832 | 0,04  | 0,961864701 | -0,52 | 0,419557334 |
| Entpd1     | -0,52 | 0,226269901 | -0,86 | 0,137933416 | 0,09  | 0,911974985 | -0,37 | 0,424954647 | -0,45 | 0,390679549 |
| Entpd2     | -0,42 | 0,48308516  | 0,18  | 0,864680059 | -0,03 | 0,973006385 | -0,36 | 0,503825028 | -0,21 | 0,783490449 |
| Entpd3     | -0,21 | 0,693792665 | -0,1  | 0,926157704 | 0,34  | 0,533790057 | -0,26 | 0,647770751 | -0,5  | 0,387681311 |
| Entpd4     | -0,08 | 0,93903777  | -0,63 | 0,608949524 | 0,95  | 0,240673303 | -0,06 | 0,967866794 | -0,66 | 0,348829447 |
| Entpd5     | -0,09 | 0,932324918 | -0,3  | 0,550465164 | 0,14  | 0,878636183 | 0,07  | 0,921731995 | -0,03 | 0,981677577 |
| Entpd6     | -0,69 | 0,282070177 | -0,44 | 0,537678815 | 0,06  | 0,965343815 | 0,7   | 0,521184735 | 0,25  | 0,887815327 |
| Entpd7     | -0,55 | 0,214139353 | -0,43 | 0,512794836 | 1,13  | 0,160467085 | 1,36  | 0,016453475 | -0,86 | 0,136651693 |
| Entpd8     | 0,08  | 0,884171483 | -0,25 | 0,601295905 | 0,06  | 0,947024436 | 0,07  | 0,930871644 | 0,02  | 0,989183416 |
| Eny2       | 0,02  | 0,975469067 | -0,27 | 0,621481182 | 0,21  | 0,765783874 | 0,94  | 0,05745194  | 0,56  | 0,324281141 |
| Eogt       | -0,65 | 0,235041275 | -0,23 | 0,707482114 | 0,6   | 0,520788057 | -0,73 | 0,259714992 | -0,15 | 0,899196564 |
| Eomes      | -0,36 | 0,439923667 | 0,03  | 0,958856577 | 0,05  | 0,963775512 | -0,31 | 0,606358501 | -0,08 | 0,938464659 |
| Ep300      | -0,28 | 0,580949427 | 0,19  | 0,783325809 | -0,28 | 0,6410789   | -0,42 | 0,30043727  | 0,01  | 0,992607235 |
| Ep400      | 0,21  | 0,664803559 | 0,19  | 0,622855078 | -0,29 | 0,563934293 | -0,23 | 0,460601513 | 0,06  | 0,939127163 |
| Epas1      | -0,3  | 0,520545783 | -0,24 | 0,582219255 | 0,15  | 0,784475468 | -0,69 | 0,061944109 | -0,44 | 0,312830548 |
| Epb41      | 0,06  | 0,937546002 | 0,1   | 0,847166413 | -0,12 | 0,877366773 | 0,07  | 0,884352208 | -0,27 | 0,69655779  |
| Epb4111    | -0,32 | 0,74764092  | 0,3   | 0,494858163 | 0,02  | 0,991456043 | 0,07  | 0,938387989 | -0,61 | 0,46990734  |
| Epb4112    | -0,27 | 0,592678993 | 0,07  | 0,93390955  | 0,04  | 0,970387898 | 0,51  | 0,115712956 | -0,13 | 0,854494093 |
| Epb4113    | -0,3  | 0,67806773  | 0,34  | 0,804897085 | -0,23 | 0,715547198 | -0,51 | 0,398222471 | 0,04  | 0,980945466 |
| Epb4114a   | 0,14  | 0,793378209 | 1,1   | 0,221481731 | -0,52 | 0,810830651 | -1,36 | 0,050515292 | 0,86  | 0,131271081 |
| Epb4114aos | 0,69  | 0,179001759 | 0,28  | 0,614530823 | -0,65 | 0,114276114 | 0,03  | 0,954541219 | 0,01  | 0,989179767 |
| Epb4114b   | -0,24 | 0,790449291 | -0,77 | 0,141029492 | 0,05  | 0,953975807 | 0,14  | 0,703751395 | -0,35 | 0,628728585 |
| Epb4115    | 0,59  | 0,455714377 | 0,11  | 0,88483892  | 1,28  | 0,119299768 | -0,62 | 0,419446232 | -0,15 | 0,910301996 |

|          |       |             |       |             |       |             |       |             |       |             |
|----------|-------|-------------|-------|-------------|-------|-------------|-------|-------------|-------|-------------|
| Epb42    | 0,04  | 0,960720096 | 0,03  | 0,969296652 | 0,02  | 0,988661889 | 0,02  | 0,972244785 | 0,33  | 0,499989818 |
| Epc1     | 0,09  | 0,929262949 | 0,22  | 0,568187167 | 0,12  | 0,923520317 | -0,31 | 0,561953814 | 0     | 0,997254437 |
| Epc2     | 0,28  | 0,74672311  | 0,35  | 0,356307531 | 0,6   | 0,591420507 | -0,52 | 0,185628374 | -0,06 | 0,948935854 |
| Epcam    | 0,57  | 0,239601221 | 0,02  | 0,98459889  | 1,72  | 0,066132339 | -0,7  | 0,494681557 | 0,02  | 0,990091016 |
| Epdr1    | -0,51 | 0,399567294 | -0,28 | 0,667502888 | 0,7   | 0,353588425 | -0,27 | 0,404293645 | -0,1  | 0,91314596  |
| Epg5     | -0,03 | 0,965482773 | -0,25 | 0,726652101 | 0,61  | 0,387588768 | -0,3  | 0,707865877 | -0,31 | 0,763240477 |
| Epgn     | 0,29  | 0,81124357  | 0,35  | 0,619597617 | 0,23  | 0,826072965 | -0,11 | 0,80795564  | -0,04 | 0,97425848  |
| Epha1    | -0,46 | 0,613990129 | 0,03  | 0,967833514 | 1,27  | 0,133552583 | -0,45 | 0,451721309 | -0,1  | 0,928671864 |
| Epha10   | 0,03  | 0,964124037 | 0,07  | 0,940150914 | -0,13 | 0,830300038 | 0,31  | 0,62344204  | 0,26  | 0,734821787 |
| Epha2    | -0,33 | 0,472378742 | -0,16 | 0,845663274 | 0,21  | 0,72066129  | 0,04  | 0,959921588 | -0,14 | 0,852678079 |
| Epha3    | 0,04  | 0,955365755 | 0,09  | 0,897141175 | -0,25 | 0,782988471 | -0,3  | 0,656753938 | -0,24 | 0,799199452 |
| Epha4    | -0,38 | 0,549493228 | -0,97 | 0,536486337 | 1,13  | 0,135721222 | -1,79 | 0,052175326 | 0,11  | 0,928724353 |
| Epha5    | -0,32 | 0,701627731 | -0,11 | 0,94248518  | -0,23 | 0,729031049 | 0,18  | 0,661916932 | -0,38 | 0,575543402 |
| Epha6    | 0,3   | 0,659879365 | -0,36 | 0,698936953 | -0,33 | 0,531023255 | -1,95 | 0,109631998 | -0,98 | 0,470588654 |
| Epha7    | 0,71  | 0,257546457 | 0,22  | 0,861080951 | 0,13  | 0,888101179 | -0,37 | 0,499807656 | 0,04  | 0,975441362 |
| Epha8    | -0,09 | 0,882500171 | 0,22  | 0,763315473 | -0,11 | 0,874098993 | -0,06 | 0,929922752 | 0,01  | 0,992607235 |
| Ephb1    | -1,37 | 0,389763388 | -0,81 | 0,104392193 | 0,68  | 0,309796962 | -0,01 | 0,994512187 | -1,12 | 0,068649705 |
| Ephb2    | -0,14 | 0,874146026 | 0,23  | 0,601295905 | 0,75  | 0,477461651 | 0,03  | 0,967866794 | -0,19 | 0,827532593 |
| Ephb3    | 0,11  | 0,911800803 | -0,14 | 0,738199172 | 0,03  | 0,981490968 | 0,29  | 0,652239525 | 0,15  | 0,866848972 |
| Ephb4    | -0,86 | 0,213935959 | -0,88 | 0,213731156 | 0,07  | 0,956894731 | -0,37 | 0,824242551 | -0,05 | 0,984065984 |
| Ephb6    | 0,22  | 0,698332739 | -0,64 | 0,323938334 | 0,08  | 0,927978381 | 0,28  | 0,466637949 | -0,25 | 0,638780444 |
| Ephx1    | -0,57 | 0,562096428 | -0,14 | 0,912535732 | 0,61  | 0,772397144 | -4,7  | 0,002149616 | -0,94 | 0,043727018 |
| Ephx2    | 0,18  | 0,731173847 | -0,07 | 0,962028658 | -0,05 | 0,97532982  | -0,29 | 0,612066557 | -0,35 | 0,6754671   |
| Ephx3    | -0,13 | 0,941464416 | -0,15 | 0,882589938 | 0,02  | 0,99407001  | -1,35 | 0,050236686 | -1    | 0,137394562 |
| Ephx4    | -0,06 | 0,944956562 | 0,11  | 0,854940418 | -0,07 | 0,920158784 | -0,65 | 0,37758398  | -0,1  | 0,96334532  |
| Epm2a    | -0,54 | 0,426342401 | -0,22 | 0,839684299 | 0,17  | 0,803439784 | -0,85 | 0,288788965 | -1,24 | 0,041040337 |
| Epm2aip1 | -0,36 | 0,419481733 | 0,09  | 0,893262563 | -0,16 | 0,790538695 | 0,13  | 0,718553452 | -0,17 | 0,776907684 |
| Epn1     | -0,4  | 0,296031134 | 0,02  | 0,976406273 | 0,04  | 0,953951069 | -0,1  | 0,842173158 | -0,17 | 0,801051293 |
| Epn2     | -0,14 | 0,79795086  | -0,23 | 0,786394409 | -0,02 | 0,982449079 | -0,53 | 0,240621937 | -0,28 | 0,643875994 |
| Epn3     | -0,01 | 0,99276206  | 0,11  | 0,905535217 | -0,38 | 0,641775458 | 0,06  | 0,926898299 | 0,14  | 0,8897371   |
| Epo      | 0,23  | 0,63880179  | 0,13  | 0,925922661 | 0,06  | 0,955242468 | -0,11 | 0,885417869 | 0,29  | 0,679810349 |
| Epor     | -0,63 | 0,468008776 | -0,99 | 0,403364852 | 1,04  | 0,179071778 | 0,62  | 0,241162703 | -0,32 | 0,720844381 |
| Eppin    | 0,16  | 0,895087252 | 0,74  | 0,208373622 | -0,4  | 0,708876309 | -0,25 | 0,625044944 | 0,32  | 0,773125975 |
| Eprs     | -0,23 | 0,54401985  | -0,19 | 0,702113021 | 0,39  | 0,369024533 | 0,77  | 0,151666903 | -0,01 | 0,989751919 |
| Eps15    | 0,23  | 0,756141549 | 0,6   | 0,245041145 | 0,35  | 0,501826628 | -0,4  | 0,393138399 | 0,32  | 0,666758661 |

|         |       |             |       |             |       |             |       |             |       |             |
|---------|-------|-------------|-------|-------------|-------|-------------|-------|-------------|-------|-------------|
| Eps15l1 | 0,05  | 0,951058395 | -0,13 | 0,832841509 | 0,07  | 0,944468902 | 0,47  | 0,214810765 | 0,29  | 0,629481302 |
| Eps8    | -0,53 | 0,434641897 | -0,34 | 0,772415321 | -0,22 | 0,729226278 | -0,53 | 0,133287397 | -0,46 | 0,532216891 |
| Eps8l1  | 0,87  | 0,450255219 | -0,03 | 0,984812702 | 0,85  | 0,532446034 | -0,11 | 0,92328164  | 0,26  | 0,876418697 |
| Eps8l2  | 0,27  | 0,619769947 | -0,22 | 0,873881223 | 0,48  | 0,425721333 | -3,76 | 0,003009221 | -0,75 | 0,220159635 |
| Eps8l3  | 0,26  | 0,661072377 | 0,04  | 0,948411715 | -0,1  | 0,88783743  | 0,2   | 0,577914953 | 0,12  | 0,881613493 |
| Epsti1  | 0,81  | 0,253982932 | 0,97  | 0,631728257 | -1,38 | 0,124912754 | 0,93  | 0,168756602 | 2,08  | 0,003331129 |
| Ept1    | -0,4  | 0,518400371 | -0,45 | 0,534814433 | 0,81  | 0,326707568 | 0,94  | 0,142375488 | -0,33 | 0,823776279 |
| Epx     | -0,08 | 0,926316023 | -0,24 | 0,803071242 | 0,2   | 0,809137779 | 0,28  | 0,655202878 | -0,13 | 0,830813323 |
| Epyc    | -0,31 | 0,685972631 | -0,23 | 0,809261555 | -0,29 | 0,712697139 | 0,19  | 0,639359737 | 0,04  | 0,97425848  |
| Eqtn    | 0,22  | 0,832696131 | 0,21  | 0,912900791 | 0,71  | 0,14709688  | -0,22 | 0,787778344 | 0,01  | 0,990633766 |
| Eral1   | 0,04  | 0,960720096 | -0,41 | 0,56631135  | 0,47  | 0,535260652 | 0,48  | 0,611276029 | -0,19 | 0,890417696 |
| Erap1   | 0,13  | 0,858980926 | 0,21  | 0,590722193 | -0,55 | 0,247700466 | 0     | 1           | 0,61  | 0,306871164 |
| Eras    | 0,21  | 0,701789703 | -0,01 | 0,998766432 | -0,31 | 0,646965864 | 0,21  | 0,766679066 | -0,07 | 0,950267521 |
| Erbb2   | -0,19 | 0,658266451 | -0,09 | 0,855632384 | 0,42  | 0,326971869 | 0,11  | 0,879787528 | 0,2   | 0,84147389  |
| Erbb2ip | 0,05  | 0,95290436  | 0,46  | 0,315902267 | -0,01 | 0,991168026 | -0,39 | 0,234019266 | 0,54  | 0,214182238 |
| Erbb3   | 0,04  | 0,970134229 | 0,05  | 0,964757836 | 1,47  | 0,153783119 | -0,07 | 0,924492971 | 0,15  | 0,881135847 |
| Erbb4   | 0,03  | 0,955200574 | 0,05  | 0,93163271  | -0,19 | 0,794364934 | -0,51 | 0,732310808 | -0,25 | 0,900126162 |
| Erc1    | -0,38 | 0,735041635 | -0,24 | 0,628779499 | 0,42  | 0,564288452 | 0,82  | 0,085668841 | -0,12 | 0,86493772  |
| Erc2    | 0,08  | 0,903817676 | -0,13 | 0,900801202 | -0,32 | 0,599127793 | -0,37 | 0,784413944 | 0,07  | 0,979152939 |
| Ercc1   | 0,03  | 0,97202153  | -0,27 | 0,637183221 | 0,33  | 0,560844955 | 0,82  | 0,222873292 | -0,17 | 0,865258929 |
| Ercc2   | -0,48 | 0,561790032 | -0,02 | 0,994042377 | 0,68  | 0,201561559 | -0,18 | 0,839678553 | -0,27 | 0,594109073 |
| Ercc3   | -0,11 | 0,892882966 | -0,18 | 0,765325717 | 0,33  | 0,662451176 | 0,09  | 0,847253572 | -0,41 | 0,593599703 |
| Ercc4   | -0,59 | 0,214430522 | 0,35  | 0,818871477 | 0,25  | 0,798348773 | -0,88 | 0,318097982 | -0,68 | 0,167735115 |
| Ercc5   | -1,26 | 0,180356049 | -0,32 | 0,661566887 | -0,21 | 0,858124262 | -0,63 | 0,283428056 | -0,01 | 0,992370267 |
| Ercc6   | 0     | 0,998237013 | 0,04  | 0,964757836 | 0,29  | 0,692825782 | 0,84  | 0,155839442 | -0,21 | 0,815310666 |
| Ercc6l  | -0,11 | 0,853941141 | -0,15 | 0,917623085 | 0,49  | 0,498063282 | 0,83  | 0,454995407 | 0,18  | 0,88451997  |
| Ercc6l2 | -0,15 | 0,856984761 | -0,66 | 0,566337065 | 1,28  | 0,004931657 | 0,2   | 0,69175243  | 0,18  | 0,838891503 |
| Ercc8   | -0,23 | 0,597519827 | 0,33  | 0,848902314 | -0,19 | 0,885599187 | 0,7   | 0,557232733 | 1,02  | 0,392127247 |
| Erdr1   | 0,46  | 0,729638783 | 0,76  | 0,219055424 | 0,23  | 0,844854601 | 0,37  | 0,48505774  | 0,56  | 0,402243953 |
| Ereg    | -0,06 | 0,953267807 | 0,08  | 0,88928164  | 0,52  | 0,366128799 | 0,2   | 0,578867273 | 0,17  | 0,814438115 |
| Erf     | -0,24 | 0,68194299  | 0,13  | 0,883631611 | -0,03 | 0,968874924 | -0,24 | 0,642853869 | 0,01  | 0,991140351 |
| Erg     | -0,27 | 0,53686867  | 0,06  | 0,945143056 | -0,12 | 0,823823322 | 0,2   | 0,699348716 | -0,29 | 0,635612479 |
| Ergic1  | -0,43 | 0,270670946 | -0,8  | 0,296841418 | 0,19  | 0,807926482 | 0,51  | 0,184464257 | -0,71 | 0,150296522 |
| Ergic2  | 0,39  | 0,407100201 | 0,02  | 0,9860901   | 0,38  | 0,58160408  | 0,12  | 0,920640884 | 0,29  | 0,783532561 |
| Ergic3  | 0,33  | 0,493929    | 0,11  | 0,809651957 | 0,08  | 0,923350407 | -0,04 | 0,955655574 | -0,33 | 0,574285481 |

|         |       |             |       |             |       |             |       |             |       |             |
|---------|-------|-------------|-------|-------------|-------|-------------|-------|-------------|-------|-------------|
| Erh     | -0,37 | 0,358272587 | -0,63 | 0,26375548  | 0,55  | 0,428838658 | 1,56  | 0,011121575 | 0,04  | 0,971719739 |
| Eri1    | -0,24 | 0,664198945 | -0,55 | 0,582741439 | 0,51  | 0,27041915  | 1,59  | 0,34431821  | 0,25  | 0,923530475 |
| Eri2    | 0,72  | 0,657480478 | 0,16  | 0,859998034 | -0,03 | 0,990975207 | -0,17 | 0,810891431 | -0,56 | 0,758234958 |
| Eri3    | -0,01 | 0,984096321 | -0,19 | 0,687515642 | 0,72  | 0,375756922 | 0,28  | 0,363783828 | -0,3  | 0,673120647 |
| Erich1  | -0,02 | 0,984040323 | -0,02 | 0,989873399 | -0,2  | 0,804362908 | -0,23 | 0,720329719 | -0,25 | 0,760401775 |
| Erich2  | -0,36 | 0,354465879 | 0,66  | 0,472960705 | -0,07 | 0,952888594 | -0,45 | 0,599245214 | -0,52 | 0,587305934 |
| Erich3  | -0,13 | 0,809289933 | -0,05 | 0,960071209 | 0,14  | 0,836670085 | 0,3   | 0,759296148 | -0,11 | 0,940438527 |
| Erich4  | 0,19  | 0,8634587   | -0,15 | 0,883639748 | -0,9  | 0,108449644 | 0,17  | 0,693336172 | 0,13  | 0,902638028 |
| Erich5  | 0,2   | 0,676797244 | 0,02  | 0,995205602 | -0,03 | 0,966299715 | -0,03 | 0,970896654 | 0     | 0,996625245 |
| Erich6  | 0,18  | 0,814980112 | 0,34  | 0,786930449 | 0,13  | 0,897233315 | -0,08 | 0,909976349 | -0,65 | 0,142592596 |
| Erich6b | 0,34  | 0,613387484 | 0,08  | 0,957390629 | -0,25 | 0,598063616 | -0,42 | 0,256328572 | -0,45 | 0,352620504 |
| Erlec1  | -0,11 | 0,909257268 | -0,34 | 0,453412271 | 0,95  | 0,173668682 | 0,42  | 0,22512259  | -0,13 | 0,845276382 |
| Erlin1  | -0,39 | 0,576339674 | 0,11  | 0,891533665 | 0,02  | 0,99129124  | 0,56  | 0,438324378 | 0,36  | 0,655657337 |
| Erlin2  | -0,31 | 0,552371969 | 0,01  | 0,994390365 | -0,01 | 0,994321552 | 0,47  | 0,388085052 | -0,07 | 0,948163009 |
| Ermap   | 0,34  | 0,687662951 | -0,18 | 0,769088831 | 0     | 0,999931921 | -0,05 | 0,954542487 | -0,58 | 0,378505645 |
| Ermard  | 0,29  | 0,765464964 | 0,31  | 0,664787536 | 0,03  | 0,980423952 | -0,41 | 0,490865019 | 0,46  | 0,48837696  |
| Ermn    | -0,19 | 0,750634506 | -0,08 | 0,955242777 | -0,3  | 0,552409541 | 0,07  | 0,900918368 | -0,14 | 0,861506431 |
| Ermp1   | -0,69 | 0,212230215 | -0,77 | 0,366674056 | 0,98  | 0,169619185 | 1     | 0,064865208 | -0,17 | 0,827532593 |
| Ern1    | 0,34  | 0,534017117 | 0,51  | 0,384803204 | 0,17  | 0,79007666  | -0,23 | 0,609350605 | -0,18 | 0,776907684 |
| Ern2    | 0,36  | 0,360242306 | -0,01 | 0,998513452 | -0,14 | 0,78168172  | 0,02  | 0,980724248 | -0,08 | 0,933759514 |
| Ero1l   | 0,49  | 0,310965981 | 0,41  | 0,817593898 | 0,3   | 0,816883729 | 0,64  | 0,37282017  | -0,5  | 0,479727901 |
| Ero1lb  | 0,48  | 0,471882852 | 0,28  | 0,786394409 | 0,49  | 0,544756897 | -0,76 | 0,236059198 | -0,03 | 0,984125319 |
| Erp27   | -0,22 | 0,811023725 | 0,15  | 0,783858612 | 0,15  | 0,852522547 | -0,51 | 0,160923323 | -0,14 | 0,882866315 |
| Erp29   | -0,29 | 0,740243422 | -0,47 | 0,472960705 | 0,09  | 0,929272323 | 0,37  | 0,344978832 | -0,42 | 0,546863793 |
| Erp44   | 0,1   | 0,860985365 | 0,05  | 0,955302758 | 0,37  | 0,746570045 | 0,48  | 0,660778996 | 0,34  | 0,785366989 |
| Errfi1  | 0,22  | 0,66609472  | 0,4   | 0,51825831  | 0,54  | 0,332065223 | 0,63  | 0,123961932 | 0,09  | 0,921263496 |
| Erv3    | 0,02  | 0,982432452 | -0,07 | 0,919602924 | -0,08 | 0,896728577 | 0,03  | 0,965667322 | -0,04 | 0,968038677 |
| Esam    | 0,04  | 0,947117278 | -0,3  | 0,529278426 | -0,33 | 0,50326008  | 0,23  | 0,561953814 | -0,39 | 0,462558109 |
| Esco1   | 0,24  | 0,557114011 | 0     | 1           | -0,24 | 0,877276526 | -0,02 | 0,993869623 | 0,51  | 0,744888681 |
| Esco2   | -1,02 | 0,214430522 | -2,32 | 0,150681594 | 1,45  | 0,249821562 | 2,68  | 0,0193598   | 0,2   | 0,913414593 |
| Esd     | -0,11 | 0,89763852  | -0,08 | 0,919762719 | -0,04 | 0,991568687 | 0,64  | 0,724314694 | 0,37  | 0,878914713 |
| Esf1    | -0,04 | 0,970463755 | -0,38 | 0,362768014 | 0,9   | 0,413379282 | 0,42  | 0,31851075  | 0,21  | 0,772878956 |
| Esm1    | -1    | 0,222236104 | -1,73 | 0,0802723   | 0,81  | 0,350201347 | -0,37 | 0,344677184 | -1,81 | 0,006269121 |
| Esp1    | -0,13 | 0,779680378 | -0,3  | 0,541518605 | -0,12 | 0,86193037  | -0,4  | 0,420230025 | 0,04  | 0,973685182 |
| Esp15   | 0,17  | 0,704646948 | 0,22  | 0,658998976 | 0,23  | 0,770526999 | -0,1  | 0,877053477 | 0,02  | 0,984632256 |

|         |       |             |       |             |       |             |       |             |       |             |
|---------|-------|-------------|-------|-------------|-------|-------------|-------|-------------|-------|-------------|
| Esp16   | -0,11 | 0,878236686 | -0,02 | 0,972150454 | 0,28  | 0,671680785 | -0,1  | 0,922275195 | 0,21  | 0,840515079 |
| Esp18   | -0,41 | 0,422422592 | -0,16 | 0,876503933 | 0,06  | 0,938795886 | -0,13 | 0,842792871 | 0,24  | 0,801087157 |
| Esp23   | -0,12 | 0,808947569 | -0,1  | 0,916822926 | -0,23 | 0,712506769 | 0,17  | 0,599572973 | 0,15  | 0,848977077 |
| Esp24   | 0,32  | 0,620282299 | -0,27 | 0,69017867  | 0,17  | 0,868590766 | -0,18 | 0,753941055 | -0,27 | 0,651911741 |
| Esp3    | -0,01 | 0,986216037 | 0     | 1           | -0,05 | 0,952005428 | -0,08 | 0,896599656 | -0,32 | 0,590339443 |
| Esp31   | -0,05 | 0,926031265 | 0,24  | 0,531706188 | 0,04  | 0,963287567 | -0,21 | 0,670124154 | -0,03 | 0,976743304 |
| Esp34   | 0,12  | 0,847178139 | 0,36  | 0,495031183 | 0,16  | 0,794542194 | -0,49 | 0,260572741 | 0,16  | 0,830013971 |
| Esp36   | 0,12  | 0,888313403 | 0,18  | 0,794404033 | 0,06  | 0,939946915 | -0,22 | 0,531023057 | -0,21 | 0,734750869 |
| Esp38   | -0,05 | 0,936139343 | 0,15  | 0,786074087 | -0,33 | 0,481896699 | 0,16  | 0,708013098 | 0,31  | 0,590339443 |
| Esp4    | 0,18  | 0,785268526 | 0,01  | 0,997700959 | 0,07  | 0,941437449 | -0,39 | 0,658513627 | -0,37 | 0,74506541  |
| Esp6    | -0,23 | 0,702017115 | -0,26 | 0,673542391 | -0,78 | 0,488112233 | 0,51  | 0,270207359 | -0,35 | 0,673577848 |
| Esp8    | 0,25  | 0,687662951 | 0,01  | 0,994355895 | 0,04  | 0,963221639 | 0,05  | 0,942937835 | -0,08 | 0,926008345 |
| Esp11   | -0,6  | 0,236389108 | -0,52 | 0,666450149 | 0,67  | 0,460875038 | 0,72  | 0,452631406 | 0,03  | 0,980961333 |
| Espn    | -0,13 | 0,830031987 | 0,01  | 0,996830826 | 0,06  | 0,950631796 | -0,4  | 0,623972583 | -0,45 | 0,639785525 |
| Espnl   | 0,02  | 0,98659023  | -0,1  | 0,829839151 | -0,13 | 0,874676122 | 0,44  | 0,185628374 | -0,09 | 0,913274952 |
| Esr1    | 0,06  | 0,948926586 | 0,28  | 0,746794144 | -0,28 | 0,820240134 | -1,79 | 0,04467629  | 0,19  | 0,874829878 |
| Esr2    | 0,17  | 0,754095492 | -0,12 | 0,892727342 | 0,12  | 0,878365741 | 0,34  | 0,499022095 | -0,17 | 0,823098095 |
| Esrp1   | -0,23 | 0,735697265 | -0,17 | 0,849511429 | 0,85  | 0,332905005 | -0,02 | 0,967766713 | -0,11 | 0,898095199 |
| Esrp2   | -0,21 | 0,744205992 | -0,2  | 0,683509429 | 0,37  | 0,628048897 | -0,58 | 0,401377581 | -0,48 | 0,533329021 |
| Esrra   | -0,27 | 0,610662221 | 0,05  | 0,931010715 | 0,04  | 0,973006385 | 0,22  | 0,70136857  | -0,1  | 0,920355527 |
| Esrrb   | -0,01 | 0,996737514 | 0,44  | 0,559139234 | -0,17 | 0,874098993 | -0,82 | 0,151396301 | -0,23 | 0,723861142 |
| Esrrg   | -0,39 | 0,393776546 | 0,39  | 0,594415097 | -0,36 | 0,623526739 | -0,16 | 0,696508135 | 0,16  | 0,787488862 |
| Esx1    | 0,07  | 0,927866076 | -0,12 | 0,935041212 | -0,08 | 0,95303117  | 0,13  | 0,828256292 | -0,13 | 0,904931004 |
| Esyt1   | -0,73 | 0,111767257 | -0,2  | 0,703255839 | 0,46  | 0,38758276  | 0,45  | 0,218429555 | -0,16 | 0,808967221 |
| Esyt2   | -0,27 | 0,642618049 | -0,1  | 0,899496232 | 0,21  | 0,750624323 | -1,43 | 0,017662145 | -0,34 | 0,46990734  |
| Esyt3   | -0,08 | 0,933815936 | 0,04  | 0,983071427 | 0,1   | 0,911634383 | 0,24  | 0,773061025 | 0,22  | 0,788546035 |
| Etaa1   | -0,1  | 0,925510521 | -0,58 | 0,361406029 | 0,03  | 0,981207238 | -0,12 | 0,827570958 | 0,24  | 0,78369432  |
| Etaa1os | 0,45  | 0,557114011 | -0,26 | 0,752263525 | -0,13 | 0,873457545 | -0,33 | 0,392931918 | -0,68 | 0,12125802  |
| Etd     | 0,38  | 0,400980668 | 0,17  | 0,683509429 | -0,07 | 0,934636205 | 0,05  | 0,908556215 | 0,36  | 0,563077271 |
| Etf1    | -0,21 | 0,648730873 | 0,04  | 0,946599376 | -0,08 | 0,929871006 | 0,38  | 0,513261302 | 0,45  | 0,486962378 |
| Etf2    | -0,75 | 0,231812139 | 0,13  | 0,930849936 | 0,34  | 0,707539555 | 0,2   | 0,819023385 | 0,34  | 0,764656525 |
| Etfb    | -0,49 | 0,232952313 | -0,38 | 0,550465164 | 0,44  | 0,416303863 | -0,31 | 0,551681549 | -0,49 | 0,462918176 |
| Etfdh   | -0,19 | 0,833382917 | -0,27 | 0,544734699 | 0,55  | 0,516728404 | 0,06  | 0,949239972 | -0,09 | 0,948759136 |
| Ethe1   | -0,11 | 0,891309235 | -0,24 | 0,748605628 | 0,44  | 0,523070601 | -0,09 | 0,852687535 | -0,25 | 0,697757911 |
| Etl4    | -0,33 | 0,641357042 | -0,06 | 0,942965593 | 0,88  | 0,17378444  | -1,07 | 0,044115677 | -0,58 | 0,252580508 |



|          |       |             |       |             |       |             |       |             |       |             |
|----------|-------|-------------|-------|-------------|-------|-------------|-------|-------------|-------|-------------|
| Etnk1    | 0,42  | 0,421957622 | 0,62  | 0,213731156 | -0,87 | 0,140777124 | -0,26 | 0,465045754 | 0,53  | 0,238928569 |
| Etnk2    | 0,32  | 0,678055716 | 0,28  | 0,468035796 | 0,19  | 0,821033224 | -0,56 | 0,205186832 | 0,39  | 0,608072805 |
| Etnppl   | -0,07 | 0,913425276 | 0,26  | 0,677440358 | -0,13 | 0,819233039 | -0,05 | 0,945086901 | 0,17  | 0,81954505  |
| Etohd2   | -0,11 | 0,834551395 | 0,24  | 0,674643073 | -0,35 | 0,723037215 | -0,6  | 0,130381469 | -0,22 | 0,771772186 |
| Etohi1   | -0,22 | 0,679989164 | 0,27  | 0,649104789 | -0,1  | 0,923520317 | -0,43 | 0,563131599 | 0,11  | 0,931482657 |
| Etos1    | -0,15 | 0,840909921 | 0,1   | 0,945143056 | -0,06 | 0,931465801 | -0,06 | 0,904971257 | -0,16 | 0,881613493 |
| Ets1     | -0,48 | 0,311616711 | -0,18 | 0,735784981 | -0,13 | 0,852728992 | 0,59  | 0,177107762 | 0,03  | 0,973576804 |
| Ets2     | -0,5  | 0,239601221 | -0,06 | 0,926178529 | 0,28  | 0,537911222 | -0,03 | 0,956121137 | 0,12  | 0,8736151   |
| Etv1     | -0,08 | 0,915589539 | -0,87 | 0,58591598  | -0,01 | 0,993379272 | 0,05  | 0,966197507 | -0,53 | 0,599242422 |
| Etv2     | -0,28 | 0,525369623 | 0,43  | 0,48206644  | 0,25  | 0,807926482 | -0,15 | 0,836855131 | 0,1   | 0,904636459 |
| Etv3     | 0,48  | 0,368709821 | 0,53  | 0,39525858  | 0,77  | 0,332905005 | 0,09  | 0,902636185 | 0,15  | 0,889613878 |
| Etv3l    | 0,23  | 0,801665973 | 0,12  | 0,88325516  | 0,13  | 0,897963852 | 0,26  | 0,787778344 | 0,05  | 0,96439553  |
| Etv4     | -0,66 | 0,239601221 | -0,57 | 0,280779553 | 0,47  | 0,530318769 | 1,35  | 0,020217488 | -0,41 | 0,467165141 |
| Etv5     | -0,43 | 0,569200107 | -0,69 | 0,143113166 | 0,58  | 0,227929911 | 0,25  | 0,426547706 | -1,05 | 0,087632866 |
| Etv6     | 0,15  | 0,752654071 | 0,6   | 0,2862434   | -0,03 | 0,974100764 | 0,86  | 0,129851263 | 0,61  | 0,266832581 |
| EU599041 | -0,03 | 0,986967942 | 0,07  | 0,94347698  | 0,07  | 0,935661195 | -0,13 | 0,896893    | -0,07 | 0,953297732 |
| Eva1a    | -0,34 | 0,561643132 | -0,02 | 0,979002922 | 0,01  | 0,992201196 | 2,73  | 0,00408837  | 1,03  | 0,043454991 |
| Eva1b    | -0,26 | 0,717407143 | 0,16  | 0,766425161 | -0,06 | 0,963199274 | -0,26 | 0,487870957 | -0,38 | 0,433684944 |
| Eva1c    | 0,31  | 0,647337606 | -0,08 | 0,95775423  | 0,42  | 0,709814408 | -1,03 | 0,15285746  | -0,34 | 0,592053999 |
| Evc      | 0,03  | 0,963914207 | -0,2  | 0,705624794 | 0,15  | 0,891365932 | -0,85 | 0,121460273 | -0,64 | 0,327246128 |
| Evc2     | -0,11 | 0,889732865 | -0,21 | 0,66248025  | -0,28 | 0,603407852 | -0,65 | 0,148336421 | -0,36 | 0,542367521 |
| Evi2a    | 0,47  | 0,278797445 | 0,06  | 0,948471284 | 0,01  | 0,993379272 | -0,05 | 0,95722877  | -0,42 | 0,545166604 |
| Evi2b    | 0,02  | 0,991967566 | 0,86  | 0,525463389 | -0,68 | 0,76370647  | -0,95 | 0,441112475 | -0,48 | 0,729367799 |
| Evi5     | -0,42 | 0,359504636 | -0,13 | 0,90891146  | 0,52  | 0,477258573 | -0,2  | 0,677777722 | -0,11 | 0,883592868 |
| Evi5l    | -0,23 | 0,705148323 | -0,45 | 0,653813558 | 0,19  | 0,863503599 | -0,2  | 0,814220979 | -0,25 | 0,80155635  |
| Evl      | -0,02 | 0,972112267 | 0,14  | 0,841007084 | 0,02  | 0,978207511 | 0,6   | 0,130272597 | -0,27 | 0,788112596 |
| Evpl     | -0,15 | 0,737939986 | -0,24 | 0,651942972 | 0,44  | 0,429975157 | 0,1   | 0,900662145 | -0,02 | 0,984125319 |
| Evx1     | 0,2   | 0,751534367 | 0,16  | 0,828219939 | 0,15  | 0,870263371 | -0,02 | 0,975655831 | 0,06  | 0,947257087 |
| Evx2     | 0,23  | 0,704419577 | -0,05 | 0,960252903 | 0,08  | 0,941627748 | 0,09  | 0,873846693 | -0,53 | 0,286520354 |
| Ewsr1    | -0,28 | 0,520609641 | -0,1  | 0,912535732 | -0,37 | 0,500343254 | 0,58  | 0,299592522 | 0,21  | 0,792343964 |
| Exd1     | 0,18  | 0,852363306 | -0,76 | 0,529278426 | -0,35 | 0,56948206  | 0,09  | 0,949432584 | -0,04 | 0,984045522 |
| Exd2     | 0,27  | 0,83300368  | -0,07 | 0,926929928 | 0,46  | 0,513307287 | -0,9  | 0,087979099 | -0,85 | 0,2047166   |
| Exo1     | -0,8  | 0,189684245 | -1,32 | 0,178589032 | 1,31  | 0,068894819 | 1,77  | 0,021416936 | -0,2  | 0,823098095 |
| Exo5     | -0,05 | 0,944969851 | 0,16  | 0,756778611 | 0,39  | 0,654328013 | 0,08  | 0,898074448 | -0,04 | 0,96738578  |
| Exoc1    | -0,21 | 0,772855197 | 0,23  | 0,732847182 | -0,05 | 0,952104131 | 0,5   | 0,353241029 | -0,14 | 0,920355527 |

|         |       |             |       |             |       |             |       |             |       |             |
|---------|-------|-------------|-------|-------------|-------|-------------|-------|-------------|-------|-------------|
| Exoc2   | 0,18  | 0,72412564  | 0,47  | 0,373492921 | -0,08 | 0,947881687 | 0,06  | 0,931477012 | 0,58  | 0,269349019 |
| Exoc3   | -0,07 | 0,932531737 | -0,24 | 0,599495018 | -0,2  | 0,806102885 | -0,4  | 0,206698166 | 0,28  | 0,579106478 |
| Exoc3l  | -0,39 | 0,373844376 | 0,13  | 0,800636573 | 0,37  | 0,548301783 | 0,06  | 0,894514108 | -0,11 | 0,898448235 |
| Exoc3l2 | -0,89 | 0,140363242 | -0,28 | 0,656204868 | 0,35  | 0,478722042 | -2,3  | 0,016453475 | -0,53 | 0,413879396 |
| Exoc3l4 | 0,01  | 0,987965359 | 0,01  | 0,9951682   | 0     | 0,999931921 | 0,97  | 0,062073395 | 0,17  | 0,879075155 |
| Exoc4   | -0,48 | 0,25387015  | -0,2  | 0,691058901 | 0,08  | 0,935945983 | -0,05 | 0,954910308 | -0,5  | 0,47520828  |
| Exoc5   | -0,04 | 0,963228289 | 0,08  | 0,938088718 | -0,14 | 0,887446966 | 1,11  | 0,05386085  | 0,81  | 0,096180357 |
| Exoc6   | -0,04 | 0,970286316 | 0,81  | 0,127301007 | 0,14  | 0,831266864 | -0,54 | 0,142375488 | 0,35  | 0,615772692 |
| Exoc6b  | -0,48 | 0,464156384 | 0,16  | 0,78455273  | -0,19 | 0,720784113 | -0,96 | 0,055624907 | -0,49 | 0,392211523 |
| Exoc7   | -0,5  | 0,504621759 | -0,19 | 0,766425161 | 0,24  | 0,638965268 | -0,26 | 0,486912097 | -0,37 | 0,590339443 |
| Exoc8   | -0,27 | 0,602160482 | -0,34 | 0,667502888 | 0     | 0,999329448 | -0,3  | 0,626791624 | -0,33 | 0,687288078 |
| Exog    | 0,05  | 0,959985598 | -0,71 | 0,742730285 | 0,33  | 0,723896318 | 0,35  | 0,837190176 | -0,44 | 0,451978873 |
| Exosc1  | -0,26 | 0,600952042 | -0,64 | 0,272116352 | 0,58  | 0,465936592 | -0,1  | 0,848348725 | -0,24 | 0,647175712 |
| Exosc10 | -0,19 | 0,739432857 | -0,16 | 0,839789639 | 0,05  | 0,954229024 | -0,27 | 0,489177076 | -0,13 | 0,85508146  |
| Exosc2  | -0,24 | 0,809560399 | -0,74 | 0,421936856 | 0,44  | 0,707539555 | 0,8   | 0,545758277 | 0,36  | 0,825518917 |
| Exosc3  | -0,51 | 0,537328866 | -0,02 | 0,994802028 | 0,5   | 0,543696688 | -0,08 | 0,885417869 | 0,12  | 0,887815327 |
| Exosc4  | -0,07 | 0,936542933 | 0,18  | 0,853162838 | -0,32 | 0,585656382 | -0,05 | 0,967866794 | -0,19 | 0,86437594  |
| Exosc5  | -0,47 | 0,338531311 | -0,53 | 0,324694411 | 0,73  | 0,193145507 | 0,59  | 0,19247613  | 0,12  | 0,899093911 |
| Exosc6  | -0,46 | 0,555673418 | -0,54 | 0,752038109 | 0,12  | 0,941551083 | 0,15  | 0,941636362 | -0,03 | 0,988971327 |
| Exosc7  | -1,07 | 0,268112899 | -0,31 | 0,493580894 | 0     | 0,998959099 | -0,04 | 0,94809223  | -0,28 | 0,631479776 |
| Exosc8  | -0,27 | 0,673314315 | -0,31 | 0,509205003 | 0,37  | 0,578272972 | 0,29  | 0,625866438 | -0,04 | 0,977967676 |
| Exosc9  | -0,2  | 0,758067417 | -0,36 | 0,700928109 | 0,37  | 0,685933617 | 0,71  | 0,088752689 | 0,02  | 0,982321176 |
| Exph5   | -0,19 | 0,676906193 | 0,08  | 0,89034555  | 0     | 0,997581017 | -0,27 | 0,454712159 | -0,16 | 0,844265172 |
| Ext1    | -0,49 | 0,397054492 | -0,57 | 0,247211638 | 0,89  | 0,03666446  | 2,03  | 0,027129047 | -0,25 | 0,79085757  |
| Ext2    | -0,26 | 0,583196213 | 0,03  | 0,956934125 | 0,46  | 0,326054745 | 0,1   | 0,813216198 | -0,42 | 0,455871424 |
| Extl1   | 0,18  | 0,772859736 | -0,13 | 0,927205716 | -0,51 | 0,248102462 | 0,07  | 0,947477693 | 0,02  | 0,989179767 |
| Extl2   | -0,23 | 0,746638199 | -0,06 | 0,959545753 | 0,29  | 0,770526999 | -0,01 | 0,994512187 | 0,04  | 0,979392852 |
| Extl3   | -0,31 | 0,524270038 | -0,25 | 0,663288343 | -0,16 | 0,840187016 | -0,71 | 0,139364198 | -1,11 | 0,052198247 |
| Eya1    | 0,21  | 0,687281352 | 1,07  | 0,219055424 | -0,29 | 0,803333635 | -0,04 | 0,963752888 | -0,63 | 0,207567334 |
| Eya2    | 0,39  | 0,35419917  | -0,05 | 0,958545812 | 0,79  | 0,139085854 | 0,23  | 0,636945912 | -0,11 | 0,917419507 |
| Eya3    | -0,23 | 0,81630789  | 0,17  | 0,873628464 | -0,08 | 0,909963525 | 0,19  | 0,76830702  | -0,07 | 0,953297732 |
| Eya4    | -0,13 | 0,865828705 | 0,37  | 0,533519538 | 0,09  | 0,899171797 | -0,73 | 0,371339886 | 0,44  | 0,820978635 |
| Ezh1    | 0,34  | 0,324465563 | 0,3   | 0,559266863 | -0,72 | 0,216361039 | -1,18 | 0,01827645  | -0,35 | 0,464497392 |
| Ezh2    | -0,53 | 0,303322303 | -1,08 | 0,141157706 | 0,81  | 0,193368921 | 1,4   | 0,051689358 | -0,06 | 0,956610289 |
| Ezr     | -0,21 | 0,81629489  | -0,84 | 0,367968212 | 1,22  | 0,076696168 | -0,11 | 0,899914853 | 0,49  | 0,432621109 |

|               |       |             |       |             |       |             |       |             |       |             |
|---------------|-------|-------------|-------|-------------|-------|-------------|-------|-------------|-------|-------------|
| F10           | -0,18 | 0,840909921 | -0,16 | 0,815317911 | 0,64  | 0,545465016 | -0,03 | 0,964356596 | -0,38 | 0,571626211 |
| F11           | 0,33  | 0,748590165 | -0,31 | 0,705747563 | -0,21 | 0,791504463 | 0,27  | 0,541906431 | 0,24  | 0,758052028 |
| F11r          | -0,13 | 0,757032046 | 0,13  | 0,825162812 | 0,01  | 0,996397104 | 0,17  | 0,62631082  | 0,14  | 0,808378459 |
| F12           | -0,03 | 0,960720096 | 0,33  | 0,471207155 | -0,22 | 0,763283408 | -0,42 | 0,244334606 | -0,03 | 0,97425848  |
| F13a1         | 0,51  | 0,421198403 | 0,08  | 0,941603439 | 0,36  | 0,60848236  | 0,21  | 0,599096064 | 0,15  | 0,885872093 |
| F13b          | -0,03 | 0,964951393 | 0,06  | 0,975103597 | -0,16 | 0,865145801 | -0,01 | 0,989985514 | 0,25  | 0,809383333 |
| F2            | -0,05 | 0,964707856 | -0,03 | 0,969314504 | 0,2   | 0,81745518  | 0,32  | 0,707865877 | 0,2   | 0,859663155 |
| F2r           | -0,08 | 0,885454028 | 0,29  | 0,607209439 | 0,52  | 0,364663958 | -2,06 | 0,010957756 | -0,47 | 0,50754323  |
| F2r1          | 0,24  | 0,827830958 | 0,76  | 0,216838547 | 0,83  | 0,411161502 | -1,71 | 0,024677311 | -0,8  | 0,297962042 |
| F2r2          | -0,17 | 0,886984367 | 0,14  | 0,788987411 | 0,03  | 0,973321979 | 0,85  | 0,423096663 | 0,3   | 0,885318142 |
| F2r3          | -0,79 | 0,212230215 | -0,42 | 0,583764309 | 1,15  | 0,146733367 | 0,6   | 0,232695925 | -0,88 | 0,086911841 |
| F3            | 0,75  | 0,287737045 | 0,63  | 0,297762088 | 0,39  | 0,52984091  | 0,34  | 0,476414891 | 0,96  | 0,061061548 |
| F420014N23Rik | -0,44 | 0,328021998 | -0,36 | 0,731912687 | 0,13  | 0,915423691 | 0,23  | 0,725544576 | -0,05 | 0,959573673 |
| F5            | 0,41  | 0,672753295 | -0,66 | 0,324289795 | -0,34 | 0,8271738   | 1,42  | 0,140538478 | -0,19 | 0,905075484 |
| F530104D19Rik | 0,21  | 0,649412093 | -0,24 | 0,664787536 | -0,23 | 0,627793773 | 0,13  | 0,762176736 | 0,02  | 0,982816728 |
| F630003A18Rik | -0,02 | 0,965991176 | 0     | 1           | -0,1  | 0,844868824 | -0,03 | 0,959777804 | -0,01 | 0,991206114 |
| F630028O10Rik | -0,44 | 0,505856084 | 0,54  | 0,375639085 | 0,34  | 0,83442082  | 0,09  | 0,887937123 | 0,61  | 0,350003424 |
| F630040K05Rik | -0,45 | 0,590164175 | 0,26  | 0,663652994 | 0,23  | 0,667627312 | -0,17 | 0,711725901 | 0,03  | 0,97813852  |
| F630040L22Rik | 0,18  | 0,764288636 | -0,08 | 0,926157704 | 0,16  | 0,878636183 | 0,37  | 0,508931788 | 0,19  | 0,75885185  |
| F630042J09Rik | 0,14  | 0,73164271  | 0,1   | 0,914952205 | -0,05 | 0,940543595 | 0,08  | 0,861612597 | -0,08 | 0,950308536 |
| F630111L10Rik | 0,14  | 0,821913288 | 0,26  | 0,668297978 | 0,39  | 0,39810038  | 0,01  | 0,978803096 | -0,16 | 0,782386442 |
| F630206G17Rik | 0,21  | 0,652385491 | 0,12  | 0,830481143 | 0,03  | 0,979196406 | 0,08  | 0,920640884 | -0,24 | 0,783490449 |
| F7            | 0,12  | 0,892823025 | -0,08 | 0,923044405 | 0,23  | 0,736555563 | -1,01 | 0,062418461 | -0,41 | 0,608072805 |
| F730016J06Rik | 0,19  | 0,683707839 | -0,16 | 0,852719676 | -0,13 | 0,849328168 | 0,05  | 0,946615246 | -0,2  | 0,753141533 |
| F730035M05Rik | 0,3   | 0,445284601 | 0,14  | 0,826858547 | -0,18 | 0,761861872 | 0,16  | 0,697336477 | 0,13  | 0,868885122 |
| F730035P03Rik | 0,17  | 0,792735264 | 0,01  | 0,996865461 | 0,11  | 0,885542465 | 0,04  | 0,967866794 | 0,13  | 0,864373858 |
| F730043M19Rik | 1,34  | 0,056077464 | 0,93  | 0,440375979 | -1,4  | 0,062075515 | -0,05 | 0,967866794 | 0,11  | 0,934615324 |
| F730048M01Rik | -0,2  | 0,766898048 | 0     | 1           | -0,36 | 0,483761569 | 0,2   | 0,564860347 | -0,27 | 0,674843991 |
| F8            | -0,1  | 0,937444361 | 1,85  | 0,17827498  | -0,72 | 0,724771746 | -5,38 | 0,005176161 | 0,69  | 0,243677524 |
| F830002L21Rik | -0,31 | 0,391793671 | -0,22 | 0,716668427 | 0,05  | 0,96043738  | 0,12  | 0,812048135 | 0,11  | 0,86244757  |
| F830005K03Rik | 0,13  | 0,792452417 | -0,08 | 0,880892852 | -0,11 | 0,848330689 | -0,01 | 0,989790023 | -0,15 | 0,799292062 |
| F830016B08Rik | 2,59  | 0,079135571 | 2,02  | 0,087315688 | -3,23 | 0,000264008 | 0,31  | 0,747003908 | 2,83  | 0,006885043 |
| F830045P16Rik | -0,19 | 0,683595325 | 0,06  | 0,958545812 | -0,35 | 0,501826628 | 0,05  | 0,941913622 | -0,07 | 0,957993472 |
| F830104G03Rik | -0,02 | 0,977195689 | -0,02 | 0,979002922 | 0,04  | 0,950846671 | -0,03 | 0,957427513 | -0,03 | 0,977236465 |
| F830208F22Rik | -0,02 | 0,968302    | -0,15 | 0,701492683 | -0,01 | 0,992126009 | 0,49  | 0,374980643 | 0     | 0,997374433 |

|               |       |             |       |             |       |             |       |             |       |             |
|---------------|-------|-------------|-------|-------------|-------|-------------|-------|-------------|-------|-------------|
| F8a           | -0,1  | 0,848780666 | -0,17 | 0,776548278 | 0,27  | 0,702928613 | 0,03  | 0,953832559 | -0,16 | 0,833369653 |
| F9            | -0,25 | 0,764057486 | -0,28 | 0,790646673 | -0,07 | 0,934133529 | 0,45  | 0,509274266 | 0,06  | 0,968130547 |
| F930015N05Rik | 0,03  | 0,964318719 | 0     | 0,998513452 | 0,08  | 0,940335002 | 0,11  | 0,761101558 | 0,25  | 0,675282484 |
| Fa2h          | 0,07  | 0,887555241 | -0,25 | 0,796482292 | 0,05  | 0,952005428 | -0,09 | 0,907662772 | -0,27 | 0,730289864 |
| Faah          | 0,04  | 0,971465817 | 0,76  | 0,427797998 | -0,32 | 0,771602154 | -0,45 | 0,506357609 | -0,03 | 0,980961333 |
| Faap100       | -0,09 | 0,934073085 | -0,28 | 0,606321818 | -0,4  | 0,378396403 | -0,13 | 0,816899875 | -0,35 | 0,604897445 |
| Faap20        | 0,46  | 0,465168175 | 0,21  | 0,812455355 | 0,13  | 0,909985189 | 0,27  | 0,465446267 | 0,23  | 0,712793529 |
| Faap24        | -0,46 | 0,527965202 | -0,62 | 0,458770201 | -0,08 | 0,937346852 | 1,07  | 0,224359102 | -0,02 | 0,991977803 |
| Fabp1         | 0,11  | 0,869225685 | 0,14  | 0,916496897 | 0,05  | 0,945886808 | 0,47  | 0,351885151 | 0,32  | 0,596300997 |
| Fabp12        | 0,25  | 0,545805455 | 0,08  | 0,929289366 | -0,29 | 0,522643974 | -0,08 | 0,910640253 | -0,02 | 0,983613958 |
| Fabp2         | -0,09 | 0,869565514 | 0     | 1           | 0,02  | 0,987245628 | 0,11  | 0,832587841 | 0,14  | 0,890833196 |
| Fabp4         | 0,1   | 0,815595316 | 0,04  | 0,943915456 | -0,03 | 0,976092199 | -0,04 | 0,939446012 | -0,21 | 0,708051749 |
| Fabp5         | 0,86  | 0,153659379 | 0,34  | 0,51825831  | 0,88  | 0,116395149 | 1,77  | 0,012730134 | -0,1  | 0,923039028 |
| Fabp6         | 0     | 0,996998625 | -0,17 | 0,860142618 | -0,11 | 0,908679723 | 0,55  | 0,275254515 | 0,22  | 0,76942924  |
| Fabp7         | -0,07 | 0,921565185 | -0,27 | 0,785573503 | -0,08 | 0,946810097 | -0,64 | 0,694368504 | -0,17 | 0,940438527 |
| Fabp9         | -0,28 | 0,639600141 | -0,03 | 0,9860901   | -0,23 | 0,934310738 | 0,22  | 0,801930792 | 0,39  | 0,579739537 |
| Fadd          | -0,1  | 0,869225685 | 0,14  | 0,866917828 | -0,02 | 0,993379272 | 0,07  | 0,919062567 | 0,22  | 0,793839436 |
| Faddos        | 0,25  | 0,512916237 | 0,1   | 0,842663656 | -0,07 | 0,910060392 | 0,01  | 0,981394554 | 0,06  | 0,949774996 |
| Fads1         | -1,1  | 0,024768323 | -0,98 | 0,153524445 | 1,39  | 0,03294007  | -0,27 | 0,582819901 | -0,89 | 0,083660756 |
| Fads2         | -1,45 | 0,071083998 | -1,11 | 0,230146302 | 1,44  | 0,156156107 | -0,19 | 0,836928265 | -1,78 | 0,05100134  |
| Fads3         | -0,64 | 0,405159358 | -0,3  | 0,588252324 | 0,47  | 0,271482188 | -0,07 | 0,940161889 | 0,12  | 0,949102947 |
| Fads6         | -0,03 | 0,964124037 | 0,09  | 0,933320126 | 0,17  | 0,785676028 | 0,29  | 0,505243866 | 0,28  | 0,656756924 |
| Faf1          | -0,46 | 0,545635346 | -0,59 | 0,552960632 | -0,32 | 0,725725788 | 0,39  | 0,318746696 | 0,08  | 0,951471487 |
| Faf2          | 0,04  | 0,955321816 | 0,19  | 0,802979985 | 0,56  | 0,374422909 | 0,18  | 0,69271453  | -0,21 | 0,807693832 |
| Fah           | 1,42  | 0,153824107 | 0,66  | 0,362584617 | 0,77  | 0,627320921 | 0,17  | 0,786750698 | -0,81 | 0,267077511 |
| Fahd1         | -0,23 | 0,78851504  | -0,01 | 0,987008697 | 0,34  | 0,614892935 | -0,02 | 0,986768223 | -0,18 | 0,864164993 |
| Fahd2a        | -0,07 | 0,969486005 | 0,36  | 0,86411353  | -0,06 | 0,962766843 | -1,42 | 0,008674249 | -0,68 | 0,170859372 |
| Faim          | -0,19 | 0,769299413 | -0,12 | 0,906267371 | -0,47 | 0,456109035 | 0,03  | 0,978569268 | -0,45 | 0,723103887 |
| Faim2         | -0,06 | 0,95290436  | 0,17  | 0,852181157 | -0,17 | 0,864598204 | 0,01  | 0,996363405 | -0,06 | 0,953297732 |
| Faiml         | -0,29 | 0,639346687 | -0,17 | 0,825692608 | -0,01 | 0,99394877  | 0,26  | 0,425113866 | -0,07 | 0,926982668 |
| Fam101a       | -0,03 | 0,962660554 | 0,09  | 0,910562533 | 0,52  | 0,332819589 | -0,48 | 0,682381472 | -0,31 | 0,835191    |
| Fam101b       | -1,4  | 0,053226128 | -1,14 | 0,136170474 | 0,98  | 0,129041282 | -1,3  | 0,026972102 | -0,79 | 0,119856586 |
| Fam102a       | -0,08 | 0,907748757 | 0,94  | 0,087315688 | -0,01 | 0,997220401 | -1,34 | 0,078283787 | -0,12 | 0,922464279 |
| Fam102b       | 0,96  | 0,048513596 | 1,44  | 0,213265335 | 0,02  | 0,989950845 | 1     | 0,204370449 | 0,98  | 0,199537078 |
| Fam104a       | -0,03 | 0,959445605 | -0,41 | 0,418712141 | 0,25  | 0,684883663 | 0,63  | 0,188915451 | -0,41 | 0,542107119 |

|           |       |             |       |             |       |             |       |             |       |             |
|-----------|-------|-------------|-------|-------------|-------|-------------|-------|-------------|-------|-------------|
| Fam105a   | -0,05 | 0,946792769 | -0,21 | 0,819802664 | -0,38 | 0,542398079 | -0,07 | 0,90910226  | 0,03  | 0,973382116 |
| Fam107a   | -0,17 | 0,840882072 | -1,15 | 0,170572591 | -0,25 | 0,867140012 | -5,22 | 0,003009221 | -1,77 | 0,021468057 |
| Fam107b   | -0,13 | 0,820785667 | 0,23  | 0,740109688 | 0,28  | 0,771729329 | -0,73 | 0,103418783 | 0,21  | 0,791631916 |
| Fam109a   | -0,13 | 0,871717973 | -0,18 | 0,805949528 | 0,28  | 0,638965268 | -0,27 | 0,637327694 | 0,15  | 0,875421436 |
| Fam109b   | -0,41 | 0,593540946 | -0,26 | 0,624860312 | 0,57  | 0,453052815 | 1,04  | 0,064024514 | 0,61  | 0,4940585   |
| Fam110a   | -0,4  | 0,681371768 | 0,34  | 0,812398829 | 0,35  | 0,468633043 | -0,87 | 0,061664353 | 0,52  | 0,368904542 |
| Fam110b   | 0,47  | 0,465168175 | -0,09 | 0,911024505 | -0,28 | 0,660567041 | -0,07 | 0,87148686  | -0,17 | 0,796713037 |
| Fam110c   | -0,31 | 0,79498488  | -0,64 | 0,514781187 | 2,06  | 0,038925327 | 0,39  | 0,570557051 | 0,18  | 0,879072575 |
| Fam111a   | 0,1   | 0,900340189 | 0,37  | 0,654457253 | 0     | 0,998229242 | 0,86  | 0,22065778  | 0,51  | 0,388897642 |
| Fam114a1  | 0,16  | 0,695932247 | 0,32  | 0,683509429 | 0,09  | 0,90345282  | 1,47  | 0,033579739 | 0,2   | 0,825871709 |
| Fam114a2  | -0,27 | 0,738714467 | -0,35 | 0,615311543 | -0,06 | 0,965775869 | -0,16 | 0,773756106 | -0,08 | 0,939448119 |
| Fam117a   | 0,25  | 0,573267041 | 0,32  | 0,641792237 | 0,01  | 0,993379272 | -0,57 | 0,220608748 | 0,34  | 0,550744961 |
| Fam117b   | -0,28 | 0,591692068 | -0,32 | 0,442648588 | 0,16  | 0,865788583 | -2,77 | 0,003009221 | -1,03 | 0,025410853 |
| Fam118a   | 0,22  | 0,902861556 | 0,34  | 0,628304186 | 0,56  | 0,485752425 | 0,17  | 0,85301747  | -0,13 | 0,898309858 |
| Fam118b   | 0,06  | 0,961472247 | -0,03 | 0,979002922 | -0,36 | 0,669266652 | 0,01  | 0,989382887 | -0,2  | 0,752873495 |
| Fam120a   | -0,07 | 0,897717279 | -0,22 | 0,612941322 | -0,21 | 0,738745938 | 0,4   | 0,313701653 | -0,29 | 0,619519967 |
| Fam120aos | -0,68 | 0,152304573 | -0,23 | 0,623157194 | 0,2   | 0,715403033 | -0,7  | 0,07392351  | -0,04 | 0,973428839 |
| Fam120b   | -0,34 | 0,526698411 | -0,07 | 0,895950162 | 0,31  | 0,507095234 | -0,74 | 0,045809254 | -0,33 | 0,554975763 |
| Fam120c   | -0,21 | 0,844104386 | -0,47 | 0,587634717 | 0,49  | 0,637321546 | -0,52 | 0,232146833 | -0,9  | 0,447019099 |
| Fam122a   | 0,04  | 0,962254712 | 0,13  | 0,823530278 | 0,11  | 0,86404468  | -0,13 | 0,712701339 | 0,19  | 0,765327693 |
| Fam122b   | -0,36 | 0,501334077 | -0,12 | 0,939289739 | 0,76  | 0,329525512 | 0,1   | 0,927963611 | -0,43 | 0,727904814 |
| Fam122c   | -0,19 | 0,714127381 | -0,2  | 0,783115379 | 0,02  | 0,990836784 | -0,07 | 0,932364636 | -0,71 | 0,210816646 |
| Fam124a   | -0,07 | 0,903817676 | 0,37  | 0,62078382  | -0,49 | 0,465949919 | -1,75 | 0,02663501  | -0,04 | 0,968130547 |
| Fam124b   | -1,35 | 0,420422353 | -0,75 | 0,470343559 | 0,74  | 0,265831901 | 1,59  | 0,251155623 | -0,7  | 0,603423878 |
| Fam126a   | -0,06 | 0,948926586 | -0,17 | 0,763796207 | -0,26 | 0,8271738   | 1,61  | 0,11957503  | 0,41  | 0,730529255 |
| Fam126b   | 0,72  | 0,474293292 | 0,34  | 0,818597532 | 0,43  | 0,450947936 | -0,43 | 0,758588473 | 0,86  | 0,456450979 |
| Fam129a   | -0,48 | 0,614842736 | -0,1  | 0,896065393 | 0,33  | 0,821229302 | 1,76  | 0,017348    | -0,17 | 0,917075631 |
| Fam129b   | -0,37 | 0,549420541 | -0,15 | 0,843162191 | 0,51  | 0,343594254 | 0,08  | 0,898801714 | -0,38 | 0,444362959 |
| Fam129c   | 0,11  | 0,892124736 | 0,1   | 0,929731201 | -0,07 | 0,935168506 | -0,27 | 0,716478691 | -0,07 | 0,954565959 |
| Fam131a   | -1,57 | 0,106666298 | -0,73 | 0,236010294 | 0,52  | 0,51912977  | 0,76  | 0,310937438 | -1,07 | 0,097359617 |
| Fam131b   | -0,33 | 0,539261112 | 0,12  | 0,91395667  | -0,1  | 0,904057901 | 0,13  | 0,845617958 | 0,24  | 0,735536943 |
| Fam131c   | 0,12  | 0,886248487 | 0,21  | 0,852719676 | -0,15 | 0,881803555 | 0,06  | 0,954851353 | -0,17 | 0,868602248 |
| Fam132a   | -0,69 | 0,175465807 | -0,56 | 0,235116318 | 0,75  | 0,173349333 | 0,61  | 0,13821008  | -0,19 | 0,801087157 |
| Fam132b   | 0,3   | 0,666546952 | -0,26 | 0,883631611 | 0,47  | 0,674635384 | 0,11  | 0,888420097 | -0,04 | 0,96923842  |
| Fam133b   | 0,14  | 0,867776344 | 0,02  | 0,994137877 | -0,29 | 0,61483831  | 0,05  | 0,938111911 | 0,08  | 0,913553402 |

|          |       |             |       |             |       |             |       |             |       |             |
|----------|-------|-------------|-------|-------------|-------|-------------|-------|-------------|-------|-------------|
| Fam134a  | -0,46 | 0,260634235 | -0,08 | 0,907700167 | 0,3   | 0,448903245 | -0,04 | 0,930475066 | 0,09  | 0,898309858 |
| Fam134b  | 0,01  | 0,998017023 | 0     | 1           | 0,59  | 0,661089127 | -1,3  | 0,228907634 | -0,52 | 0,736747951 |
| Fam134c  | -0,56 | 0,428049245 | -0,41 | 0,520949685 | 0,1   | 0,935866644 | 0,15  | 0,784116723 | -0,18 | 0,81954505  |
| Fam135a  | 0,33  | 0,479529641 | 0,28  | 0,641514442 | 0,23  | 0,783052291 | -1,52 | 0,05029287  | 0,24  | 0,78532501  |
| Fam135b  | 0,54  | 0,286058681 | -0,15 | 0,894205636 | -0,21 | 0,722149463 | -0,21 | 0,696596685 | -0,28 | 0,666026291 |
| Fam136a  | -0,29 | 0,728516314 | -0,46 | 0,491696913 | 0,62  | 0,418524099 | 0,02  | 0,964692144 | -0,64 | 0,381486385 |
| Fam13a   | 0,2   | 0,764288636 | 0,33  | 0,729172466 | -0,36 | 0,485917439 | -1,08 | 0,326956022 | -0,72 | 0,573106355 |
| Fam13b   | 0,39  | 0,620142108 | -0,17 | 0,859954464 | 0,45  | 0,700200486 | 0,41  | 0,694025296 | 0,04  | 0,980961333 |
| Fam13c   | -0,65 | 0,433427344 | 0,12  | 0,864553622 | 0,18  | 0,828844883 | 0,13  | 0,80795564  | -0,42 | 0,440709829 |
| Fam149a  | -0,64 | 0,187002581 | -0,83 | 0,275147283 | 0,31  | 0,637321546 | 0,73  | 0,077320465 | -0,92 | 0,065968102 |
| Fam149b  | -0,31 | 0,546348907 | -0,05 | 0,951079171 | 0,34  | 0,545465016 | -0,21 | 0,628251769 | -0,31 | 0,637926661 |
| Fam150a  | -0,26 | 0,607003998 | 0,2   | 0,750555245 | -0,37 | 0,501664412 | -0,14 | 0,736704521 | -0,08 | 0,918290969 |
| Fam150b  | -0,23 | 0,658266451 | 0,1   | 0,915828259 | -0,05 | 0,956894731 | 0,27  | 0,677756558 | 0,26  | 0,802065913 |
| Fam151a  | 0,82  | 0,187868882 | -0,12 | 0,893656409 | -0,21 | 0,861307315 | 0,06  | 0,90213506  | -0,4  | 0,456564217 |
| Fam151b  | 0,18  | 0,85029103  | -0,18 | 0,831118301 | -0,48 | 0,404341148 | -0,27 | 0,521206029 | 0,05  | 0,971414641 |
| Fam155a  | 1,3   | 0,092437253 | 0,51  | 0,297870473 | -0,08 | 0,902672106 | 0,3   | 0,623245048 | 0,16  | 0,911850421 |
| Fam159a  | 0,26  | 0,715991706 | -0,1  | 0,856242883 | -0,18 | 0,834488055 | 0,08  | 0,942937835 | -0,03 | 0,981677577 |
| Fam159b  | -0,08 | 0,94739162  | 0,12  | 0,847885195 | 0,18  | 0,899629874 | -0,18 | 0,759468604 | -0,5  | 0,380694619 |
| Fam160a1 | -0,35 | 0,358823255 | -0,45 | 0,562442925 | 0,4   | 0,50264478  | -0,56 | 0,321953491 | -0,86 | 0,16021172  |
| Fam160a2 | 0,07  | 0,93128208  | -0,22 | 0,820806352 | 0,52  | 0,707571856 | 0,33  | 0,506792594 | 0,16  | 0,800540569 |
| Fam160b1 | -0,2  | 0,816465857 | -0,49 | 0,589051408 | 0,35  | 0,660092451 | 0,88  | 0,426802119 | -0,41 | 0,739121045 |
| Fam160b2 | 0,02  | 0,980913066 | -0,19 | 0,817056576 | 0,18  | 0,808065828 | -0,11 | 0,885913289 | -0,65 | 0,268016026 |
| Fam161a  | 0,09  | 0,891309235 | -0,32 | 0,746132762 | -0,06 | 0,950271429 | -0,15 | 0,869771015 | -0,07 | 0,956585095 |
| Fam161b  | -0,17 | 0,865055523 | 0,02  | 0,995709562 | 0,42  | 0,764154568 | -0,21 | 0,840657538 | 0,42  | 0,745134899 |
| Fam162a  | 1,03  | 0,102058516 | -0,01 | 0,996105203 | 0,07  | 0,955984004 | 1,27  | 0,014096241 | -0,21 | 0,777561251 |
| Fam162b  | 0,14  | 0,899359458 | 0,13  | 0,882931058 | -0,03 | 0,9728699   | -0,36 | 0,542091514 | -0,27 | 0,802802845 |
| Fam163a  | 0,3   | 0,657723995 | 0,28  | 0,723989536 | 0,7   | 0,397054993 | -0,08 | 0,90213506  | -0,06 | 0,948935854 |
| Fam163b  | 0,24  | 0,769667799 | -0,58 | 0,301688101 | -0,03 | 0,984778342 | 0,73  | 0,150910046 | 0,13  | 0,884248437 |
| Fam166a  | -0,1  | 0,914383847 | -0,02 | 0,988922072 | -0,01 | 0,996322566 | -0,16 | 0,656038987 | -0,11 | 0,898448235 |
| Fam166b  | -0,09 | 0,910559408 | 0,32  | 0,644516897 | 0,33  | 0,64759465  | -0,2  | 0,781604449 | -0,42 | 0,550083777 |
| Fam167a  | -0,47 | 0,575887113 | 0,2   | 0,775914311 | 1,13  | 0,087998582 | 1,54  | 0,040672569 | 0,17  | 0,825862506 |
| Fam167b  | 0,26  | 0,578088949 | 0,36  | 0,352137531 | -0,3  | 0,597054271 | 0,4   | 0,335352248 | 0,26  | 0,647876293 |
| Fam168a  | 0,06  | 0,938106189 | -0,2  | 0,690453271 | 0,22  | 0,786838878 | -0,41 | 0,331328372 | -0,53 | 0,294528259 |
| Fam168b  | 0,24  | 0,721512947 | 0,22  | 0,800636573 | -0,29 | 0,700200486 | 0,6   | 0,37999934  | 0,15  | 0,855630829 |
| Fam169a  | -0,25 | 0,665901437 | -0,34 | 0,794093297 | -0,13 | 0,895862678 | -0,13 | 0,880348219 | -0,35 | 0,586118577 |

|             |       |             |       |             |       |             |       |             |       |             |
|-------------|-------|-------------|-------|-------------|-------|-------------|-------|-------------|-------|-------------|
| Fam169b     | 0,14  | 0,860985365 | -0,23 | 0,750273889 | 0,07  | 0,952315003 | 0,32  | 0,405818144 | -0,25 | 0,754385101 |
| Fam170a     | -0,05 | 0,953868772 | 0,08  | 0,959673534 | -0,01 | 0,993379272 | 0,39  | 0,348660866 | 0,27  | 0,664376213 |
| Fam170b     | 0,28  | 0,60854678  | -0,01 | 0,998237793 | -0,27 | 0,589590343 | -0,01 | 0,988718521 | 0,04  | 0,960065122 |
| Fam171a1    | -0,68 | 0,179001759 | -0,35 | 0,478984994 | 0,45  | 0,598378377 | -1,51 | 0,039739447 | -0,7  | 0,278096307 |
| Fam171a2    | -0,86 | 0,14568937  | -0,89 | 0,103513448 | 0,14  | 0,877598693 | 1,57  | 0,011121575 | -0,54 | 0,575543402 |
| Fam171b     | 0,88  | 0,572570614 | 1,49  | 0,308953095 | 0,04  | 0,990836784 | 0,82  | 0,691718699 | 0     | 0,999455919 |
| Fam172a     | -0,39 | 0,507090099 | -0,48 | 0,664765388 | -0,35 | 0,384550489 | 0,12  | 0,944769683 | -0,11 | 0,953297732 |
| Fam173a     | 0,24  | 0,616754408 | -0,44 | 0,581931436 | 0,53  | 0,470379063 | 0,14  | 0,794100987 | -0,24 | 0,691243011 |
| Fam173b     | -0,53 | 0,586458491 | -0,4  | 0,793428452 | 0,36  | 0,862246043 | 0,28  | 0,921423877 | -0,09 | 0,977903513 |
| Fam174a     | 0,12  | 0,808947569 | -0,07 | 0,912516873 | -0,17 | 0,753584137 | -0,17 | 0,699348716 | -0,07 | 0,94919447  |
| Fam174b     | -0,05 | 0,957398577 | -0,41 | 0,698886888 | -0,01 | 0,9954711   | -0,07 | 0,928002892 | 0,14  | 0,934185668 |
| Fam175a     | -1    | 0,328445973 | -0,1  | 0,96172404  | 0,23  | 0,834042944 | 0,72  | 0,716478691 | -0,07 | 0,980945466 |
| Fam175b     | 0,02  | 0,982589459 | 0,34  | 0,715348909 | -0,13 | 0,935970536 | -0,5  | 0,352091788 | -0,03 | 0,976743304 |
| Fam177a     | -0,28 | 0,602160482 | -0,02 | 0,979002922 | 0,58  | 0,276930456 | -0,1  | 0,896599656 | 0,28  | 0,69655779  |
| Fam178a     | -0,21 | 0,721378796 | 0,25  | 0,7219659   | -0,13 | 0,824244582 | -0,24 | 0,813792791 | 0,35  | 0,752497404 |
| Fam178b     | -0,02 | 0,987965359 | -0,03 | 0,963369162 | -0,23 | 0,791390652 | 0,26  | 0,759281029 | -0,26 | 0,760555206 |
| Fam179a     | -0,12 | 0,829299665 | 0,05  | 0,917256002 | 0,26  | 0,700975611 | 0,19  | 0,577911395 | 0,07  | 0,937558003 |
| Fam179b     | -0,05 | 0,94881239  | 0,26  | 0,593605226 | 0,06  | 0,956340132 | 0,18  | 0,774181256 | 0,28  | 0,759432231 |
| Fam180a     | -0,05 | 0,963914207 | -0,17 | 0,735689605 | -0,2  | 0,79284622  | 0,27  | 0,695337192 | -0,13 | 0,870257991 |
| Fam181a     | -0,03 | 0,949437499 | -0,01 | 0,981630855 | -0,03 | 0,966414094 | 0,13  | 0,737340657 | 0,17  | 0,788112596 |
| Fam181b     | -0,4  | 0,40477934  | -0,09 | 0,840725934 | -0,05 | 0,949101317 | -2,5  | 0,012175785 | -0,07 | 0,952718905 |
| Fam183b     | 0,29  | 0,529026439 | -0,34 | 0,569633919 | 0,01  | 0,996260936 | 0,26  | 0,700179376 | 0,01  | 0,992370267 |
| Fam184a     | -0,03 | 0,959661454 | -0,44 | 0,441593532 | 0,06  | 0,932866273 | 0,25  | 0,631067875 | -0,11 | 0,915356549 |
| Fam184b     | 0,24  | 0,783574667 | 0,06  | 0,94892312  | -0,01 | 0,992919703 | -0,06 | 0,947551542 | 0,3   | 0,759906029 |
| Fam185a     | -0,06 | 0,94881239  | 0,34  | 0,738762579 | 0,46  | 0,469985431 | -0,02 | 0,982432935 | 0,11  | 0,918529364 |
| Fam186b     | 0,25  | 0,67894761  | -0,38 | 0,756813839 | -0,05 | 0,952416436 | 0,07  | 0,939275881 | -0,58 | 0,395115041 |
| Fam187a     | 0,19  | 0,679451519 | 0,1   | 0,926178529 | -0,42 | 0,43250076  | 0,24  | 0,508919266 | 0,51  | 0,343706058 |
| Fam187b     | 0,17  | 0,764189777 | -0,21 | 0,724196236 | -0,22 | 0,786838878 | -0,43 | 0,376757421 | -0,2  | 0,820160199 |
| Fam188a     | 0,77  | 0,08334043  | 0,39  | 0,568282579 | 0,02  | 0,990836784 | 1,33  | 0,228208515 | 1,08  | 0,281086581 |
| Fam188b     | -0,14 | 0,844104386 | 0,22  | 0,693589797 | -0,09 | 0,935168506 | 0,71  | 0,299592522 | -0,43 | 0,662728263 |
| Fam188b2-ps | 0,03  | 0,950669622 | 0,03  | 0,956998711 | -0,16 | 0,782590389 | -0,07 | 0,860971441 | 0,09  | 0,898125699 |
| Fam189a1    | -0,05 | 0,960597621 | 0,26  | 0,544440118 | 0,15  | 0,861837147 | -0,2  | 0,770010922 | -0,28 | 0,728388857 |
| Fam189a2    | -0,08 | 0,94756262  | 0,35  | 0,804897085 | -0,44 | 0,744387748 | -2,78 | 0,009399265 | 0,13  | 0,844105751 |
| Fam189b     | -0,31 | 0,543067892 | -0,02 | 0,980518468 | 0,45  | 0,512995479 | 0,26  | 0,534953123 | -0,58 | 0,321777445 |
| Fam192a     | -0,25 | 0,614878886 | -0,03 | 0,987162042 | 0,47  | 0,443039118 | 0,14  | 0,729835365 | 0,07  | 0,936439146 |

|          |       |             |       |             |       |             |       |             |       |             |
|----------|-------|-------------|-------|-------------|-------|-------------|-------|-------------|-------|-------------|
| Fam193a  | 0,17  | 0,731173847 | 0,45  | 0,313570544 | -0,03 | 0,979822436 | -0,39 | 0,236458533 | 0,27  | 0,639267711 |
| Fam193b  | 0,32  | 0,523457397 | 0,08  | 0,894563348 | -0,39 | 0,61190379  | -0,49 | 0,536344767 | -0,56 | 0,497150675 |
| Fam195a  | -0,56 | 0,306806693 | -0,11 | 0,897684193 | 0,03  | 0,987003605 | 0,64  | 0,137576047 | -0,1  | 0,926281317 |
| Fam195b  | -0,2  | 0,698332739 | -0,13 | 0,853484596 | 0,1   | 0,911634383 | 0,14  | 0,891540239 | -0,21 | 0,826206511 |
| Fam196a  | -0,02 | 0,978208877 | -0,1  | 0,94892312  | 0,06  | 0,94940954  | 0,19  | 0,785027978 | -0,2  | 0,752873495 |
| Fam196b  | 0,32  | 0,46691413  | 0,07  | 0,954502447 | 0,2   | 0,809137779 | -0,29 | 0,592457782 | 0,12  | 0,85381954  |
| Fam198a  | 0,17  | 0,739900148 | -0,39 | 0,594415097 | 0,15  | 0,862480223 | 0,01  | 0,990811855 | -0,31 | 0,677838252 |
| Fam198b  | -1,87 | 0,08334043  | -1,8  | 0,127981054 | 0,64  | 0,179552168 | 0,03  | 0,981610833 | -1,33 | 0,205235667 |
| Fam199x  | -0,37 | 0,591725454 | -0,22 | 0,641804702 | -0,28 | 0,834979811 | -0,05 | 0,945195883 | -0,29 | 0,647064303 |
| Fam19a1  | -0,11 | 0,873799393 | 0,48  | 0,389273523 | -0,18 | 0,859477854 | -0,13 | 0,908535783 | 0,48  | 0,666026291 |
| Fam19a2  | -0,06 | 0,921565185 | 0,11  | 0,922703368 | 0,36  | 0,397324055 | 0,37  | 0,3883153   | 0,17  | 0,864415219 |
| Fam19a3  | -0,06 | 0,941262141 | 0,01  | 0,994735911 | 0,94  | 0,279611345 | 1,58  | 0,008053214 | -0,15 | 0,865258929 |
| Fam19a4  | -0,21 | 0,687662951 | 0,24  | 0,639419375 | -0,03 | 0,972285775 | -0,35 | 0,431967511 | 0,03  | 0,980961333 |
| Fam19a5  | -0,12 | 0,911800803 | -0,42 | 0,708497748 | -0,21 | 0,856605654 | 0,39  | 0,693136389 | 0,2   | 0,890957032 |
| Fam204a  | -0,25 | 0,640223012 | -0,07 | 0,931754626 | 0,22  | 0,7674045   | 1,02  | 0,453557155 | 0,93  | 0,466753993 |
| Fam205a1 | 0,08  | 0,899187422 | 0,16  | 0,690263811 | -0,28 | 0,698662367 | -0,22 | 0,783511455 | 0,01  | 0,994774512 |
| Fam205c  | 0,03  | 0,981937173 | -0,17 | 0,864368418 | -0,45 | 0,416452856 | 0,04  | 0,971404035 | -0,09 | 0,903119542 |
| Fam206a  | -0,08 | 0,894555208 | -0,34 | 0,715348909 | 0,41  | 0,562169896 | 0,91  | 0,485223835 | 0,05  | 0,980961333 |
| Fam207a  | -0,74 | 0,172698611 | -0,03 | 0,970832543 | -0,15 | 0,825186838 | 0,44  | 0,222362849 | 0,43  | 0,443268905 |
| Fam208a  | 0,55  | 0,325246268 | 0,2   | 0,793603525 | 0,09  | 0,943472333 | -0,24 | 0,700431952 | 0,58  | 0,344052279 |
| Fam208b  | 0,44  | 0,351889801 | 0,6   | 0,43731683  | 0,16  | 0,881463812 | 0,21  | 0,577432583 | 0,67  | 0,227590255 |
| Fam209   | 0,6   | 0,568104198 | 0,74  | 0,302028989 | 0,41  | 0,601444701 | 0,3   | 0,786750698 | 0,04  | 0,97683359  |
| Fam20a   | -0,39 | 0,454732336 | 0,37  | 0,532316439 | 0,04  | 0,974887915 | -2,91 | 0,004704128 | -0,58 | 0,31182908  |
| Fam20b   | -0,49 | 0,205216327 | 0,08  | 0,918694468 | 0,58  | 0,560191012 | 0,24  | 0,666925404 | -0,49 | 0,412624375 |
| Fam20c   | -0,23 | 0,663556512 | -0,47 | 0,693906911 | 0,49  | 0,620160252 | -0,3  | 0,785530576 | 0,16  | 0,936181394 |
| Fam21    | 0,27  | 0,761120978 | -0,01 | 0,990052916 | 0,42  | 0,370554673 | 0,18  | 0,720329719 | 0,02  | 0,987744008 |
| Fam210a  | 0,04  | 0,976574175 | -0,38 | 0,49125334  | 0,57  | 0,637321546 | 0,09  | 0,92406164  | -0,45 | 0,488584326 |
| Fam210b  | 0,38  | 0,410102633 | -0,09 | 0,877840602 | -0,24 | 0,620837479 | 0,89  | 0,208316321 | -0,53 | 0,578723072 |
| Fam212a  | -0,43 | 0,456353173 | 0,33  | 0,798523336 | -0,27 | 0,777918093 | -0,58 | 0,254823462 | -0,29 | 0,678303508 |
| Fam212b  | -0,07 | 0,919567534 | -0,09 | 0,926157704 | -0,19 | 0,760721308 | -0,09 | 0,861507915 | -0,15 | 0,811915032 |
| Fam213a  | 0,24  | 0,771549051 | -0,45 | 0,632414396 | -0,43 | 0,58611331  | -1,67 | 0,097710906 | 0,1   | 0,943938567 |
| Fam213b  | -0,3  | 0,701391957 | -0,38 | 0,782652703 | 0,63  | 0,120781056 | -0,29 | 0,692483691 | -0,54 | 0,246245872 |
| Fam214a  | 0,29  | 0,673367834 | 0,28  | 0,586289005 | 0,51  | 0,436585215 | 2,1   | 0,009396945 | -0,36 | 0,554975763 |
| Fam214b  | 0,24  | 0,628474488 | -0,02 | 0,988550087 | 0,28  | 0,780072407 | -0,11 | 0,903965681 | -0,52 | 0,525018839 |
| Fam216a  | -0,35 | 0,464939452 | -0,52 | 0,393855735 | 0,75  | 0,337509636 | 0,21  | 0,703831158 | -0,09 | 0,933827144 |



|           |       |             |       |             |       |             |       |             |       |             |
|-----------|-------|-------------|-------|-------------|-------|-------------|-------|-------------|-------|-------------|
| Fam216b   | -0,15 | 0,83189852  | -0,14 | 0,853390906 | 0,18  | 0,830507475 | 0,22  | 0,637157307 | -0,01 | 0,995109577 |
| Fam217a   | -0,42 | 0,593540946 | -0,68 | 0,385322607 | 0,1   | 0,934056359 | -0,17 | 0,885996165 | -0,63 | 0,602530139 |
| Fam217b   | -0,28 | 0,561977827 | 0,61  | 0,41028104  | 0,23  | 0,742758388 | -0,56 | 0,235443733 | -0,27 | 0,726042963 |
| Fam219a   | -0,05 | 0,949868652 | 0,28  | 0,593830815 | -0,4  | 0,418745342 | -0,22 | 0,735613782 | -0,08 | 0,940438527 |
| Fam219aos | 0,43  | 0,778869381 | -0,73 | 0,227889432 | 0,22  | 0,823501349 | -0,14 | 0,899335603 | -0,41 | 0,666758661 |
| Fam219b   | -0,27 | 0,614727955 | -0,33 | 0,68442935  | -0,26 | 0,693902137 | -0,63 | 0,579837977 | -0,01 | 0,995462242 |
| Fam220a   | 0,04  | 0,978853388 | -0,05 | 0,940269529 | 0,55  | 0,484120719 | 0,94  | 0,508651205 | 0,63  | 0,577808038 |
| Fam221a   | -0,22 | 0,814444163 | 0,24  | 0,796482292 | 0,99  | 0,375756922 | 0,33  | 0,686514009 | -0,26 | 0,858314976 |
| Fam221b   | 0,21  | 0,735860437 | 0,32  | 0,518998821 | -0,31 | 0,753966565 | -0,17 | 0,825017636 | -0,03 | 0,976795857 |
| Fam222a   | 0,16  | 0,772012849 | -0,14 | 0,88928164  | 0,13  | 0,871929853 | -0,74 | 0,322501612 | -0,15 | 0,872943048 |
| Fam222b   | 0,25  | 0,66609472  | -0,08 | 0,902294619 | 0,14  | 0,846975965 | 0,04  | 0,944600114 | 0,05  | 0,954657649 |
| Fam227a   | -0,35 | 0,598965932 | 0,69  | 0,485614177 | -0,07 | 0,954453764 | -0,58 | 0,707895464 | -0,25 | 0,913553402 |
| Fam227b   | 0,1   | 0,896249068 | 0,25  | 0,848439865 | -0,18 | 0,830594849 | -0,15 | 0,825265029 | 0,12  | 0,906338603 |
| Fam228a   | 0,33  | 0,425312793 | -0,29 | 0,566263948 | 0,22  | 0,714346477 | 0,65  | 0,251630483 | 0,56  | 0,375162254 |
| Fam228b   | 0,19  | 0,665609782 | 0,12  | 0,796106258 | -0,18 | 0,836633803 | 0,03  | 0,967866794 | 0,2   | 0,791840213 |
| Fam229a   | -0,23 | 0,765643907 | 0,17  | 0,850048209 | 0,19  | 0,707539555 | 0,01  | 0,996122185 | -0,17 | 0,835492993 |
| Fam229b   | 0,61  | 0,52432471  | -0,92 | 0,732847182 | -0,28 | 0,878636183 | 0,1   | 0,956015204 | -0,06 | 0,973382116 |
| Fam234a   | 0     | 0,997266885 | -0,31 | 0,690701372 | 0,29  | 0,754457064 | -0,27 | 0,598657551 | -1,06 | 0,060128676 |
| Fam234b   | -0,4  | 0,733130683 | -0,07 | 0,929731201 | 0,14  | 0,857413845 | -0,04 | 0,963392781 | -0,5  | 0,489352424 |
| Fam24a    | 0,02  | 0,983516046 | 0,05  | 0,932338539 | -0,09 | 0,935978536 | -0,29 | 0,339974285 | -0,2  | 0,743854135 |
| Fam25c    | -0,36 | 0,609460842 | 0,28  | 0,509013394 | 0,19  | 0,783749875 | 0,09  | 0,861140391 | 0,58  | 0,332695011 |
| Fam26d    | 0,28  | 0,644471952 | 0,05  | 0,965413567 | -0,28 | 0,653394119 | 0,2   | 0,700431952 | -0,05 | 0,958778604 |
| Fam26e    | 0,01  | 0,986829217 | 0,36  | 0,473163236 | -0,07 | 0,931899359 | -0,22 | 0,461824013 | 0     | 0,996625245 |
| Fam26f    | 1,18  | 0,186426897 | 0,79  | 0,153524445 | -1,06 | 0,096547725 | -0,11 | 0,85846312  | 2,56  | 0,003940056 |
| Fam32a    | -0,02 | 0,972164346 | 0,21  | 0,713150732 | 0,07  | 0,925245169 | -0,09 | 0,893846627 | 0,06  | 0,956610289 |
| Fam35a    | 0,14  | 0,932654105 | 0,07  | 0,927582737 | -0,02 | 0,989923808 | -0,79 | 0,48725211  | -0,59 | 0,616737918 |
| Fam3a     | -0,19 | 0,844179933 | 0,61  | 0,561562373 | 0,38  | 0,727262258 | -0,67 | 0,361424073 | -0,38 | 0,673577848 |
| Fam3b     | 0,29  | 0,578748992 | 0,16  | 0,813516293 | 0,11  | 0,881463812 | 0,22  | 0,695337192 | 0,11  | 0,894551509 |
| Fam3c     | -0,25 | 0,602160482 | -0,5  | 0,336433977 | 0,94  | 0,161297116 | -0,65 | 0,239884131 | -0,83 | 0,26953096  |
| Fam43a    | -0,52 | 0,291625562 | -0,19 | 0,703923817 | 0,18  | 0,736255182 | 0,14  | 0,695760666 | -0,42 | 0,388412166 |
| Fam43b    | -0,15 | 0,722504009 | 0,39  | 0,501438027 | -0,43 | 0,462643491 | -0,29 | 0,612066557 | 0,03  | 0,980961333 |
| Fam45a    | 0,05  | 0,918804282 | -0,46 | 0,583200444 | 0,15  | 0,824306509 | 0,11  | 0,805097143 | 0,05  | 0,969617491 |
| Fam46a    | 0,27  | 0,730419898 | 0,46  | 0,507054817 | -0,4  | 0,370554673 | -0,16 | 0,898690469 | 0,01  | 0,992404764 |
| Fam46b    | 0,25  | 0,664803559 | -0,27 | 0,666450149 | -0,07 | 0,944078985 | 0,22  | 0,644183069 | -0,3  | 0,608072805 |
| Fam46c    | 0,51  | 0,493024489 | 0,09  | 0,907186434 | 0,1   | 0,950076566 | -1,71 | 0,072625002 | 0,22  | 0,879075155 |

|         |       |             |       |             |       |             |       |             |       |             |
|---------|-------|-------------|-------|-------------|-------|-------------|-------|-------------|-------|-------------|
| Fam46d  | -0,18 | 0,752554638 | 0,25  | 0,644818618 | -0,34 | 0,718702897 | -0,04 | 0,955211988 | 0,56  | 0,703778332 |
| Fam47c  | 0,03  | 0,964272364 | 0,2   | 0,627386884 | -0,04 | 0,95907725  | -0,08 | 0,830016199 | -0,02 | 0,980961333 |
| Fam47e  | -0,03 | 0,98297164  | 0,71  | 0,390751508 | -0,06 | 0,96043738  | -0,63 | 0,496782884 | -0,12 | 0,933011676 |
| Fam49a  | 0,46  | 0,214430522 | 0,3   | 0,802528523 | 0,23  | 0,842919139 | 0,46  | 0,48728376  | 0,27  | 0,772124176 |
| Fam49b  | -0,11 | 0,892949421 | -0,03 | 0,96172404  | 0,23  | 0,702541777 | 0,66  | 0,367104963 | 0,11  | 0,939948423 |
| Fam50a  | -0,14 | 0,832947001 | 0,24  | 0,828219939 | -0,17 | 0,851934258 | -0,5  | 0,524646721 | 0,02  | 0,987527273 |
| Fam50b  | 0,07  | 0,902426436 | 0,07  | 0,922703368 | -0,2  | 0,767822182 | 0,64  | 0,310394717 | 0,64  | 0,360726287 |
| Fam53a  | 0,24  | 0,691564542 | -0,13 | 0,755498335 | 0,66  | 0,295720005 | 0,36  | 0,578790789 | -0,11 | 0,916837154 |
| Fam53b  | -0,48 | 0,333609372 | 0,02  | 0,985764487 | -0,08 | 0,938835957 | -0,97 | 0,035978047 | -0,64 | 0,306747854 |
| Fam53c  | 0,11  | 0,839881823 | -0,03 | 0,979002922 | 0,16  | 0,811994297 | -0,17 | 0,845813504 | -0,27 | 0,763240477 |
| Fam57a  | -0,49 | 0,212091984 | -0,38 | 0,493580894 | 0,53  | 0,343594254 | 0,71  | 0,191733901 | 0,12  | 0,894623317 |
| Fam57b  | 0,04  | 0,972701787 | -0,21 | 0,732044571 | -0,36 | 0,670995836 | -0,19 | 0,698362346 | -1,24 | 0,042920116 |
| Fam58b  | -0,47 | 0,343457563 | -0,82 | 0,136921511 | 0,43  | 0,604588937 | 0,49  | 0,486912097 | -0,15 | 0,898821988 |
| Fam60a  | -0,47 | 0,536125623 | -0,25 | 0,775914311 | 0,24  | 0,689570537 | 0,57  | 0,512724455 | -0,04 | 0,979643119 |
| Fam63a  | 0,18  | 0,731774338 | 0,14  | 0,84536438  | -0,19 | 0,757498725 | 0,22  | 0,504537645 | 0,05  | 0,956236731 |
| Fam63b  | -0,03 | 0,976574175 | 0,25  | 0,78137215  | -0,24 | 0,840187016 | -0,53 | 0,229859806 | 0,2   | 0,820657685 |
| Fam64a  | -1,09 | 0,104256193 | -2    | 0,136170474 | 1,33  | 0,207797844 | 2,57  | 0,01321417  | -0,33 | 0,593148264 |
| Fam65a  | -0,22 | 0,679451519 | -0,03 | 0,977103763 | -0,04 | 0,963199274 | -0,55 | 0,187952931 | -0,55 | 0,246447566 |
| Fam65b  | 0,36  | 0,704720946 | 0,12  | 0,832117565 | -0,32 | 0,704122998 | -1,53 | 0,009316702 | -0,65 | 0,651930786 |
| Fam65c  | 0,01  | 0,991919022 | 0,34  | 0,613344994 | -0,22 | 0,760930184 | 0,04  | 0,962871535 | -0,15 | 0,844079844 |
| Fam69a  | -1,07 | 0,50685922  | 0,05  | 0,983071427 | 0,05  | 0,968399063 | -1,89 | 0,026377711 | 0,7   | 0,296343159 |
| Fam69b  | 0,08  | 0,94061448  | -0,23 | 0,738810128 | -0,24 | 0,786630361 | -0,8  | 0,167552848 | -0,85 | 0,307816931 |
| Fam69c  | -0,21 | 0,833900133 | 0,2   | 0,732847182 | -0,36 | 0,521569092 | 0,22  | 0,597332937 | -0,25 | 0,675282484 |
| Fam71a  | -0,39 | 0,700358581 | 0,08  | 0,918167746 | -0,11 | 0,953007693 | -0,92 | 0,067122689 | -0,31 | 0,5803138   |
| Fam71b  | 0,37  | 0,457967905 | 0,17  | 0,701043773 | -0,3  | 0,707845564 | -0,02 | 0,972584224 | 0,27  | 0,642685227 |
| Fam71d  | 0,75  | 0,239619978 | 0,02  | 0,985764487 | -0,09 | 0,895520077 | 0,37  | 0,425645585 | 0,35  | 0,777223566 |
| Fam71e1 | 0,12  | 0,892195063 | 0,65  | 0,424863079 | -0,03 | 0,977827235 | -0,04 | 0,955374619 | -0,11 | 0,899196564 |
| Fam71e2 | -0,53 | 0,518267881 | 0,42  | 0,469366179 | 0,01  | 0,993071391 | -0,51 | 0,25645371  | -0,31 | 0,537589934 |
| Fam71f1 | -0,78 | 0,438318142 | -0,11 | 0,883145635 | 0,41  | 0,721083003 | -0,35 | 0,575297022 | -0,54 | 0,579591044 |
| Fam71f2 | -0,05 | 0,948926586 | 0,17  | 0,724092689 | -0,41 | 0,670926345 | 1,63  | 0,025872379 | -0,41 | 0,697226565 |
| Fam72a  | 0,44  | 0,443299253 | 0,71  | 0,219241031 | 0,3   | 0,843091338 | 0,56  | 0,239917575 | 0,19  | 0,875421436 |
| Fam73a  | 0,38  | 0,643425366 | 0,09  | 0,912137323 | 0,1   | 0,938795886 | -0,04 | 0,971151107 | 0,36  | 0,662790079 |
| Fam73b  | -0,23 | 0,595596483 | -0,39 | 0,320304632 | 0,12  | 0,867654013 | -0,14 | 0,840529829 | -0,45 | 0,598963515 |
| Fam76a  | -0,15 | 0,840644928 | 0,41  | 0,535229346 | -0,61 | 0,437087993 | -0,79 | 0,126608574 | 0,12  | 0,865866242 |
| Fam76b  | -0,18 | 0,761814986 | -0,08 | 0,929692416 | -0,28 | 0,652745075 | -0,06 | 0,901790178 | -0,13 | 0,878966527 |

|          |       |             |       |             |       |             |       |             |       |             |
|----------|-------|-------------|-------|-------------|-------|-------------|-------|-------------|-------|-------------|
| Fam78a   | -0,33 | 0,494965971 | -0,14 | 0,76677473  | 0,05  | 0,956340132 | 0,9   | 0,137777394 | 0,26  | 0,632958559 |
| Fam78b   | -0,5  | 0,266230034 | -0,8  | 0,115392055 | 0,67  | 0,202939985 | 2,77  | 0,033579739 | -0,07 | 0,950048707 |
| Fam81a   | -0,14 | 0,904669376 | -0,44 | 0,827496723 | -0,09 | 0,944468902 | -1,04 | 0,353547948 | 0,21  | 0,914498972 |
| Fam81b   | -0,05 | 0,95071774  | 0,13  | 0,915297775 | -0,17 | 0,785705386 | 0,09  | 0,882008164 | 0,12  | 0,905581898 |
| Fam83a   | -0,04 | 0,963914207 | 0,05  | 0,958856577 | -0,24 | 0,770526999 | 0,27  | 0,512305128 | 0,61  | 0,362980572 |
| Fam83b   | -0,03 | 0,976574175 | -0,08 | 0,9152526   | 0,84  | 0,186321498 | 0,17  | 0,813711032 | -0,18 | 0,815135645 |
| Fam83c   | 0,07  | 0,926306096 | 0,13  | 0,816132656 | 0,02  | 0,980801972 | 0,22  | 0,658011013 | 0,13  | 0,862867603 |
| Fam83d   | -0,28 | 0,782889069 | -0,24 | 0,835533307 | 1,59  | 0,019957728 | 1,5   | 0,045809254 | 0,46  | 0,543465696 |
| Fam83e   | -0,14 | 0,79795086  | -0,19 | 0,781665479 | 0,13  | 0,90531201  | 0,02  | 0,9704566   | -0,11 | 0,915587326 |
| Fam83f   | 0,16  | 0,864691627 | -0,53 | 0,490814009 | -0,47 | 0,461720231 | 0,44  | 0,512935647 | 0,08  | 0,940438527 |
| Fam83g   | -0,05 | 0,948926586 | 0,67  | 0,325242663 | 0,01  | 0,995677064 | -0,17 | 0,81497696  | 0,13  | 0,851637639 |
| Fam83h   | 0,23  | 0,679989164 | 0,02  | 0,970980557 | 0,59  | 0,432229079 | 0,16  | 0,739831108 | -0,1  | 0,92519473  |
| Fam84a   | -0,11 | 0,841200817 | -0,16 | 0,720215229 | 0,07  | 0,967054242 | 0,62  | 0,080778307 | 0,18  | 0,834671019 |
| Fam84b   | 0,01  | 0,993175772 | 0,39  | 0,800176188 | 0,34  | 0,638965268 | -1,16 | 0,07770141  | -0,12 | 0,898448235 |
| Fam89a   | -0,5  | 0,434486198 | -0,39 | 0,520395205 | 0,02  | 0,987003605 | 0,98  | 0,079094743 | 0,04  | 0,957403509 |
| Fam89b   | -0,19 | 0,701627731 | -0,27 | 0,666450149 | 0,34  | 0,69871815  | 0,16  | 0,795439286 | -0,23 | 0,731211225 |
| Fam8a1   | 0,05  | 0,952540667 | 0,28  | 0,543900329 | -0,4  | 0,675688576 | -0,21 | 0,692706301 | -0,12 | 0,884640084 |
| Fam90a1a | 0,53  | 0,493268835 | 0,16  | 0,891749049 | -0,13 | 0,901662646 | -0,33 | 0,715850858 | -0,56 | 0,33353181  |
| Fam90a1b | -0,26 | 0,745617945 | -0,11 | 0,880892852 | 0,06  | 0,955303601 | 0,05  | 0,961963439 | -0,18 | 0,887732548 |
| Fam91a1  | -0,03 | 0,98297164  | -0,2  | 0,748874675 | 0,11  | 0,904057901 | 1,28  | 0,023030105 | 0,14  | 0,840515079 |
| Fam92a   | -0,29 | 0,464156384 | -0,77 | 0,430665523 | 0,91  | 0,320344505 | 0,85  | 0,187024509 | -0,31 | 0,765438999 |
| Fam92b   | -0,07 | 0,932531737 | 0,44  | 0,450412216 | -0,13 | 0,852412472 | -0,35 | 0,690488202 | -0,26 | 0,765809384 |
| Fam96a   | -0,29 | 0,469692532 | -0,34 | 0,574343122 | 0,42  | 0,653810439 | 0,75  | 0,061226494 | -0,08 | 0,936447878 |
| Fam96b   | 0,36  | 0,419591944 | 0,07  | 0,908677592 | 0,17  | 0,846176253 | -0,25 | 0,480121746 | 0,15  | 0,809216399 |
| Fam98a   | -0,81 | 0,371554727 | -0,75 | 0,223537    | 0,78  | 0,22657669  | 2,26  | 0,125210827 | 0,88  | 0,484671151 |
| Fam98b   | -0,05 | 0,94881239  | 0,08  | 0,910688765 | 0,29  | 0,589148903 | 1,48  | 0,114653039 | 0,31  | 0,792732275 |
| Fam98c   | 0,15  | 0,752042687 | -0,48 | 0,354667412 | 0,17  | 0,816883729 | -0,16 | 0,737366847 | -0,54 | 0,268757924 |
| Fan1     | -0,16 | 0,815649066 | 0,42  | 0,713854173 | -0,2  | 0,811669636 | -0,48 | 0,57819548  | 0,13  | 0,92519473  |
| Fanca    | -0,4  | 0,325246268 | -1    | 0,164189612 | 0,72  | 0,316019354 | 1,33  | 0,016541517 | -0,02 | 0,979456872 |
| Fanfb    | -0,26 | 0,782889069 | -1,4  | 0,163435114 | 0,18  | 0,898935616 | -1,49 | 0,100777201 | -0,08 | 0,958856121 |
| Fancc    | 0,19  | 0,832696131 | -0,14 | 0,781665479 | -0,33 | 0,772397144 | 0,02  | 0,978782666 | -0,12 | 0,928671864 |
| Fancd2   | -1    | 0,1462515   | -0,84 | 0,271145766 | 0,52  | 0,485752425 | 0,77  | 0,181187575 | -0,02 | 0,979456872 |
| Fancd2os | 0,2   | 0,721134093 | 0,03  | 0,979002922 | 0,1   | 0,904057901 | 0,32  | 0,340742528 | 0,37  | 0,486308499 |
| Fance    | 0,05  | 0,936033208 | -0,74 | 0,49125334  | 1,02  | 0,189578329 | -0,03 | 0,985817346 | 0,12  | 0,934128771 |
| Fanfc    | -0,25 | 0,742823915 | -0,14 | 0,75198259  | 0,1   | 0,930549237 | -0,16 | 0,869148815 | 0,04  | 0,978604922 |

|         |       |             |       |             |       |             |       |             |       |             |
|---------|-------|-------------|-------|-------------|-------|-------------|-------|-------------|-------|-------------|
| Fancg   | -0,7  | 0,194977962 | -0,09 | 0,940269529 | -0,52 | 0,466079601 | 0,15  | 0,837974367 | -0,6  | 0,223294439 |
| Fanci   | -0,4  | 0,42677652  | -0,69 | 0,383504117 | 0,48  | 0,342694189 | 0,77  | 0,248620467 | -0,74 | 0,328082125 |
| Fancl   | -0,15 | 0,8634587   | 0,14  | 0,777015154 | 0,56  | 0,612977553 | -0,38 | 0,451755251 | 0,12  | 0,91339829  |
| Fancm   | -0,7  | 0,644085637 | -1,6  | 0,092751242 | 0,34  | 0,691268573 | 1,67  | 0,055958675 | 0,53  | 0,60105426  |
| Fank1   | 0,3   | 0,654667088 | -0,15 | 0,896065393 | -0,16 | 0,829285065 | -0,1  | 0,908141892 | -0,31 | 0,795692519 |
| Fap     | -0,42 | 0,797276781 | 0,53  | 0,492893939 | -0,01 | 0,997581017 | -1,27 | 0,026291732 | 0,95  | 0,052231507 |
| Far1    | 0,05  | 0,949362206 | 0,08  | 0,884434898 | 0,08  | 0,947117869 | 0,71  | 0,231453076 | 0,61  | 0,337960521 |
| Far1os  | 0,31  | 0,497466519 | 0,23  | 0,817110093 | 0,04  | 0,969262382 | 0,03  | 0,989314626 | 0,21  | 0,909555782 |
| Far2    | -0,02 | 0,97382475  | -0,15 | 0,823246376 | 0,25  | 0,777417583 | 0,07  | 0,920036779 | -0,05 | 0,960974478 |
| Far2os2 | 0,16  | 0,818611891 | 0,3   | 0,4433825   | 0,17  | 0,816081776 | -0,04 | 0,948659208 | -0,03 | 0,978604922 |
| Farp1   | -0,37 | 0,541645792 | -0,45 | 0,49941722  | 0,37  | 0,607318275 | 0,28  | 0,543833948 | -0,25 | 0,655956123 |
| Farp2   | 0,08  | 0,963036332 | 0,05  | 0,981441793 | 0,45  | 0,500343254 | -0,56 | 0,577278073 | -0,49 | 0,537706015 |
| Fars2   | -0,27 | 0,673291416 | 0     | 1           | -0,24 | 0,749607234 | 0,31  | 0,657562365 | 0,31  | 0,726042963 |
| Farsa   | -0,33 | 0,645057952 | -0,32 | 0,470112519 | 0,07  | 0,955586257 | 1,25  | 0,174848313 | 0,77  | 0,431894609 |
| Farsb   | -0,44 | 0,358933591 | -0,57 | 0,255162575 | 0,32  | 0,533790057 | 0,67  | 0,224725482 | 0,02  | 0,988996243 |
| Fas     | 1,51  | 0,130333862 | 1,32  | 0,110965122 | -0,94 | 0,279117877 | -4,51 | 0,003440207 | -0,38 | 0,46391899  |
| Fasl    | -0,11 | 0,846313357 | 0     | 0,999395995 | -0,5  | 0,406359307 | 0,28  | 0,502488051 | 0,01  | 0,99476381  |
| Fasn    | -1,4  | 0,051263109 | -1,49 | 0,0802723   | 0,93  | 0,089775868 | 0,6   | 0,206964621 | -0,46 | 0,508609594 |
| Fastk   | 0     | 0,999549745 | 0,11  | 0,820806352 | 0,21  | 0,695930773 | 0,03  | 0,970931237 | -0,15 | 0,882728747 |
| Fastkd1 | -0,23 | 0,886741208 | -0,41 | 0,379721127 | -0,42 | 0,706842882 | 0,54  | 0,703627304 | 0,12  | 0,955910202 |
| Fastkd2 | -0,57 | 0,401159049 | -0,61 | 0,493580894 | 0,27  | 0,901071918 | 0,5   | 0,146536035 | -0,01 | 0,992370267 |
| Fastkd3 | -0,27 | 0,514850048 | -0,27 | 0,785153081 | 0,18  | 0,849342965 | -0,25 | 0,839567244 | -0,5  | 0,641589842 |
| Fastkd5 | -0,14 | 0,911404262 | -0,47 | 0,544440118 | 0,39  | 0,69872014  | 0,46  | 0,601064249 | 0,2   | 0,862984047 |
| Fat1    | -0,96 | 0,319596051 | 0,35  | 0,802440628 | 1,45  | 0,009294792 | -1,64 | 0,049871982 | -1,07 | 0,05100134  |
| Fat2    | 0,37  | 0,701086418 | 0,38  | 0,765325717 | 0,2   | 0,804607903 | 0,11  | 0,932633294 | 0,46  | 0,694863808 |
| Fat3    | -0,02 | 0,989784447 | 0,13  | 0,866844066 | -0,1  | 0,904057901 | -0,18 | 0,883783927 | -0,27 | 0,818807963 |
| Fat4    | -0,27 | 0,51326218  | -0,22 | 0,680709276 | -0,08 | 0,921956183 | -0,05 | 0,915888138 | -0,18 | 0,742614391 |
| Fate1   | 0,18  | 0,919567534 | -0,07 | 0,977005012 | -0,17 | 0,836983457 | -0,24 | 0,765911385 | 0,13  | 0,889613878 |
| Fau     | 0,25  | 0,561560626 | 0,13  | 0,806413387 | -0,01 | 0,993379272 | 0,18  | 0,63007404  | 0,02  | 0,980945466 |
| Faxc    | -0,17 | 0,909284689 | -0,94 | 0,561562373 | 0,52  | 0,616978696 | 0,7   | 0,114764321 | -0,33 | 0,618748455 |
| Fbf1    | 0,21  | 0,688503606 | -0,01 | 0,995205602 | -0,25 | 0,669266652 | -0,22 | 0,661916932 | -0,33 | 0,573048999 |
| Fbl     | -0,69 | 0,156158686 | -0,99 | 0,107449087 | 0,29  | 0,838740214 | 1,23  | 0,160044671 | -0,2  | 0,890833196 |
| Fblim1  | -0,77 | 0,149941264 | -0,57 | 0,220176471 | 0,25  | 0,752196529 | 0,04  | 0,95852873  | -0,74 | 0,152609394 |
| Fbl1    | 0,07  | 0,937076069 | 0,49  | 0,287819603 | 0,13  | 0,890842571 | 0,11  | 0,809801882 | 0,13  | 0,884640084 |
| Fbln1   | -0,52 | 0,498717216 | 0,04  | 0,980518468 | -0,08 | 0,952104131 | -0,43 | 0,567185019 | -0,65 | 0,446887547 |

|          |       |             |       |             |       |             |       |             |       |             |
|----------|-------|-------------|-------|-------------|-------|-------------|-------|-------------|-------|-------------|
| Fbln2    | -1,09 | 0,116800904 | -0,87 | 0,245917773 | 1,43  | 0,041414494 | -1,58 | 0,019419918 | -1,25 | 0,029071378 |
| Fbln5    | -1,18 | 0,111456265 | -0,84 | 0,18729601  | 0,54  | 0,313065218 | -2,43 | 0,004853653 | -1,28 | 0,023444293 |
| Fbln7    | 0,05  | 0,964154899 | 0,31  | 0,532316439 | 0,1   | 0,923258105 | -0,37 | 0,368956303 | -0,07 | 0,949032619 |
| Fbn1     | -0,01 | 0,995106813 | 1,15  | 0,141157706 | -0,33 | 0,620837479 | -1,43 | 0,027543078 | 0,19  | 0,801987865 |
| Fbn2     | -0,39 | 0,507799043 | 0,39  | 0,480808447 | 0,08  | 0,926263109 | -0,17 | 0,743170266 | 0,08  | 0,934745577 |
| Fbp1     | -0,01 | 0,991919022 | -0,23 | 0,841908385 | 0,07  | 0,943934563 | -1,49 | 0,027716298 | -0,23 | 0,872242794 |
| Fbp2     | 0,31  | 0,711728312 | 0,41  | 0,661566887 | -0,39 | 0,660920525 | -0,41 | 0,551681549 | -0,45 | 0,510946331 |
| Fbrs     | 0,24  | 0,574608525 | -0,04 | 0,961139695 | -0,09 | 0,919116989 | -0,12 | 0,91388554  | -0,44 | 0,631479776 |
| Fbrsl1   | -0,29 | 0,640414995 | -0,14 | 0,790033542 | 0,05  | 0,940550094 | 0,12  | 0,81096279  | 0,32  | 0,582299997 |
| Fbxl12   | 0,15  | 0,858748956 | -0,36 | 0,792112243 | 0,18  | 0,877598693 | -0,83 | 0,045135351 | 0,34  | 0,582734169 |
| Fbxl12os | -0,09 | 0,909232325 | -0,09 | 0,934907409 | -0,29 | 0,565284752 | -0,45 | 0,633071558 | -0,03 | 0,982214841 |
| Fbxl13   | 0,57  | 0,36631183  | -0,05 | 0,965589332 | 0,09  | 0,90283613  | 0,23  | 0,690263313 | 0,7   | 0,220768726 |
| Fbxl14   | -0,28 | 0,465265572 | -0,12 | 0,835533307 | 0,41  | 0,40940812  | -0,23 | 0,586345334 | -0,18 | 0,791286924 |
| Fbxl15   | 0,07  | 0,90742841  | -0,13 | 0,844500324 | 0,15  | 0,811065774 | 0,18  | 0,754925446 | 0,3   | 0,699060093 |
| Fbxl16   | 0     | 0,998964203 | -0,21 | 0,666285906 | -0,32 | 0,704593934 | -0,5  | 0,64635885  | -0,11 | 0,951033938 |
| Fbxl17   | 0,14  | 0,758605503 | -0,15 | 0,782712411 | 0,21  | 0,830300038 | 0,32  | 0,368598637 | 0,27  | 0,660989136 |
| Fbxl18   | -0,41 | 0,323723495 | -0,1  | 0,923487338 | 0,21  | 0,804931845 | 0,08  | 0,920929266 | -0,18 | 0,860591136 |
| Fbxl19   | -0,31 | 0,529398718 | 0,17  | 0,702406882 | 0,43  | 0,379638471 | 0,45  | 0,36184569  | -0,33 | 0,598017941 |
| Fbxl2    | -0,08 | 0,934809007 | 0,06  | 0,951375162 | 0,48  | 0,319105917 | 0,26  | 0,645849839 | -0,16 | 0,872665918 |
| Fbxl20   | -0,23 | 0,672766563 | -0,13 | 0,851610126 | 0,72  | 0,485917439 | 0,04  | 0,968266606 | -0,71 | 0,629481302 |
| Fbxl21   | -0,7  | 0,241021853 | -0,36 | 0,503323618 | 0,51  | 0,654328013 | 1,29  | 0,040564476 | 0,35  | 0,694233384 |
| Fbxl22   | 0,04  | 0,961694454 | 0,21  | 0,777015154 | -0,14 | 0,846591983 | 0,26  | 0,718433562 | -0,11 | 0,932081395 |
| Fbxl3    | -0,08 | 0,926007268 | -0,12 | 0,839866333 | -0,14 | 0,850258511 | -0,12 | 0,842224319 | 0,38  | 0,504445914 |
| Fbxl4    | 0,28  | 0,671795384 | 0,36  | 0,594415097 | 0,36  | 0,618895586 | -1,02 | 0,08358638  | 0,19  | 0,821040461 |
| Fbxl5    | 1,37  | 0,046630958 | 0,87  | 0,180045682 | -0,94 | 0,25964678  | 1,25  | 0,091541776 | 1,5   | 0,034496056 |
| Fbxl6    | -0,06 | 0,963831902 | 0,26  | 0,808498635 | -0,09 | 0,936425237 | 0,35  | 0,665334658 | -0,02 | 0,987332974 |
| Fbxl7    | -0,48 | 0,4850569   | -0,19 | 0,760600519 | 0,55  | 0,240270395 | -0,74 | 0,091718792 | -0,69 | 0,158817444 |
| Fbxl8    | -0,19 | 0,784951771 | -0,41 | 0,568187167 | 0,34  | 0,660920525 | 0,04  | 0,965734988 | 0,18  | 0,848955614 |
| Fbxo10   | -0,54 | 0,464156384 | -0,1  | 0,93451524  | 0,27  | 0,787410721 | -0,51 | 0,138899159 | -0,78 | 0,109985853 |
| Fbxo11   | 0,08  | 0,935203545 | 0,26  | 0,483998954 | 0,8   | 0,059479841 | -0,19 | 0,578090005 | -0,11 | 0,899825706 |
| Fbxo15   | -0,05 | 0,944291635 | 0,06  | 0,967833514 | 0     | 0,998185389 | 0,41  | 0,535705026 | 0,06  | 0,94919447  |
| Fbxo16   | -0,21 | 0,728098709 | 0,52  | 0,418712141 | 0,09  | 0,931775098 | -0,44 | 0,686127719 | -0,35 | 0,623304657 |
| Fbxo17   | 0,01  | 0,991919022 | -0,29 | 0,804311994 | 0,77  | 0,382532767 | 0,03  | 0,979516321 | 0,02  | 0,985280749 |
| Fbxo18   | -0,42 | 0,382845839 | -0,25 | 0,656542439 | 0,13  | 0,876854444 | 0,09  | 0,93510539  | -0,05 | 0,976743304 |
| Fbxo2    | 0,63  | 0,359023627 | 0,4   | 0,335516054 | 0,03  | 0,980423952 | -0,47 | 0,412187247 | 0,57  | 0,428751049 |

|        |       |             |       |             |       |             |       |             |       |             |
|--------|-------|-------------|-------|-------------|-------|-------------|-------|-------------|-------|-------------|
| Fbxo21 | -0,57 | 0,191492041 | -0,13 | 0,918167746 | 0,22  | 0,83346229  | 0,11  | 0,845813504 | -0,58 | 0,330575453 |
| Fbxo22 | 0,01  | 0,996219097 | -0,17 | 0,7296094   | 0,24  | 0,683975246 | -0,32 | 0,574104307 | -0,16 | 0,863496792 |
| Fbxo24 | -0,06 | 0,952453567 | 0,09  | 0,905189352 | 0,08  | 0,938771378 | -0,15 | 0,79475151  | -0,05 | 0,97694481  |
| Fbxo25 | -0,3  | 0,701627731 | 0,04  | 0,967338233 | 1,16  | 0,243283845 | -0,79 | 0,149223245 | -0,25 | 0,73141172  |
| Fbxo27 | 0,13  | 0,813201941 | 0,13  | 0,897645724 | -0,15 | 0,821229302 | -0,67 | 0,248861811 | 0     | 0,996821235 |
| Fbxo28 | -0,21 | 0,597519827 | -0,14 | 0,923044405 | 1,42  | 0,062241863 | 1,33  | 0,147265329 | -0,15 | 0,940438527 |
| Fbxo3  | -0,06 | 0,911074343 | -0,06 | 0,942166578 | -0,15 | 0,947207818 | -0,15 | 0,886383641 | -0,19 | 0,887719506 |
| Fbxo30 | 0,32  | 0,488544285 | 0,51  | 0,371189141 | 0,18  | 0,800142198 | -0,38 | 0,468479478 | 0,03  | 0,978009126 |
| Fbxo31 | -0,84 | 0,178543406 | -0,57 | 0,26012575  | 0,42  | 0,630056981 | -0,05 | 0,950330103 | -0,18 | 0,848977077 |
| Fbxo32 | 0,04  | 0,981777139 | 0,62  | 0,17827498  | 0,16  | 0,913132002 | 0,24  | 0,650245314 | -0,25 | 0,765809384 |
| Fbxo33 | 0,53  | 0,176610036 | 0,22  | 0,824113739 | 0,28  | 0,79007666  | 0,36  | 0,43212345  | 0,03  | 0,976743304 |
| Fbxo34 | -0,04 | 0,97114796  | 0,37  | 0,359870082 | -0,05 | 0,946598383 | 0,04  | 0,975234611 | 0,34  | 0,793839436 |
| Fbxo36 | -0,17 | 0,86343981  | 0,03  | 0,968437059 | 0,6   | 0,448189249 | -0,65 | 0,368956303 | -0,88 | 0,253650803 |
| Fbxo38 | -0,04 | 0,954364925 | 0,32  | 0,49252156  | -0,38 | 0,549895527 | -0,32 | 0,575297022 | -0,09 | 0,936985458 |
| Fbxo39 | 0,54  | 0,568787523 | 0,62  | 0,606124067 | -0,53 | 0,223293599 | -0,54 | 0,374972559 | -0,23 | 0,885318142 |
| Fbxo4  | -0,17 | 0,858748956 | 0,06  | 0,959673534 | -0,06 | 0,932866273 | 0,25  | 0,680245242 | 0,09  | 0,933307994 |
| Fbxo40 | 0,44  | 0,339065946 | 0,22  | 0,747707816 | -0,09 | 0,895357497 | 0,04  | 0,964634131 | -0,07 | 0,95587699  |
| Fbxo41 | 0,08  | 0,908926623 | 0,25  | 0,531518093 | 0,13  | 0,839250602 | -0,07 | 0,91157983  | -0,22 | 0,77360786  |
| Fbxo42 | -0,08 | 0,902628825 | -0,01 | 0,998237793 | 0,42  | 0,584456821 | 0,52  | 0,52218381  | 0     | 0,999303691 |
| Fbxo43 | 0,2   | 0,789391045 | 0,1   | 0,910688765 | -0,32 | 0,555443611 | -0,09 | 0,897883112 | 0,09  | 0,913553402 |
| Fbxo44 | 0,11  | 0,931290577 | -0,2  | 0,696962659 | 0,68  | 0,530587266 | -1,18 | 0,065355633 | 0,98  | 0,158709655 |
| Fbxo45 | 0,25  | 0,702406672 | -0,18 | 0,849473761 | 0,07  | 0,940489823 | 0,33  | 0,401433114 | -0,29 | 0,716979399 |
| Fbxo46 | -0,37 | 0,681657169 | -0,02 | 0,987282412 | -0,17 | 0,877714146 | -0,8  | 0,218201058 | -0,24 | 0,801087157 |
| Fbxo47 | 0,35  | 0,483299704 | -0,22 | 0,716668427 | 0,16  | 0,830336321 | 0,27  | 0,435927433 | 0,45  | 0,46348763  |
| Fbxo48 | -0,48 | 0,496008309 | -0,62 | 0,418418761 | 0,87  | 0,640107475 | 0,65  | 0,580120569 | -0,45 | 0,808989975 |
| Fbxo5  | -1,23 | 0,132157697 | -2,29 | 0,084290601 | 0,43  | 0,702541777 | 0,34  | 0,728505397 | -0,04 | 0,983469081 |
| Fbxo6  | 0,38  | 0,559760851 | 0,64  | 0,347797865 | -0,31 | 0,549446867 | -0,2  | 0,742706747 | 1,07  | 0,043727018 |
| Fbxo7  | 0,69  | 0,289213915 | 0,22  | 0,750192373 | 0,12  | 0,916403684 | -2,07 | 0,065063652 | -0,69 | 0,515021287 |
| Fbxo8  | -0,09 | 0,913921068 | -0,27 | 0,806456132 | 0,08  | 0,952104131 | -0,19 | 0,799124652 | -0,01 | 0,9939542   |
| Fbxo9  | 0,1   | 0,919567534 | -0,28 | 0,759157634 | 0,01  | 0,99407001  | 0,17  | 0,912858228 | 0,31  | 0,836061657 |
| Fbxw10 | -0,09 | 0,914090929 | -0,32 | 0,571026746 | 0,02  | 0,987563007 | -0,07 | 0,921423877 | 0,03  | 0,984847718 |
| Fbxw11 | -0,27 | 0,442260471 | 0,06  | 0,928036933 | 0,25  | 0,748197014 | 0,73  | 0,155839442 | 0,37  | 0,518826178 |
| Fbxw13 | -0,36 | 0,619165359 | 0,11  | 0,927073711 | 0,08  | 0,940056885 | 0,16  | 0,873610553 | -0,3  | 0,750963915 |
| Fbxw15 | 0,36  | 0,600952042 | -0,25 | 0,818072947 | -0,18 | 0,737241227 | 0,19  | 0,868473157 | -0,06 | 0,97425848  |
| Fbxw16 | -0,39 | 0,666297306 | -0,32 | 0,638598252 | 0,11  | 0,932866273 | 0,9   | 0,098469592 | 0,08  | 0,939127163 |

|        |       |             |       |             |       |             |       |             |       |             |
|--------|-------|-------------|-------|-------------|-------|-------------|-------|-------------|-------|-------------|
| Fbxw17 | 0,11  | 0,893137556 | 0,4   | 0,782652703 | -0,75 | 0,393221211 | 0,74  | 0,263246878 | 1,72  | 0,01813934  |
| Fbxw18 | 0,68  | 0,187868882 | 0,24  | 0,89081665  | 0,16  | 0,920858287 | -0,02 | 0,986412644 | 0,56  | 0,407809227 |
| Fbxw19 | -0,04 | 0,966775766 | 0,4   | 0,666450149 | -0,15 | 0,873867385 | 0,01  | 0,994512187 | 0,09  | 0,952190189 |
| Fbxw2  | 0,2   | 0,751568489 | -0,25 | 0,618087796 | -0,19 | 0,775367269 | -0,23 | 0,481267072 | -0,01 | 0,990633766 |
| Fbxw20 | 0,34  | 0,501682835 | 0,52  | 0,560526999 | -0,39 | 0,537652209 | -0,24 | 0,763366023 | 0,01  | 0,991216325 |
| Fbxw21 | -0,2  | 0,844688163 | 0,41  | 0,650744134 | -0,02 | 0,990836784 | -0,43 | 0,655202878 | -0,3  | 0,824818547 |
| Fbxw22 | 0,25  | 0,758144862 | 0,21  | 0,826403785 | 0,35  | 0,702689055 | -0,01 | 0,994512187 | 0,5   | 0,603423878 |
| Fbxw24 | 0,2   | 0,843836953 | -0,18 | 0,878701681 | -0,1  | 0,91055915  | 0,32  | 0,308123565 | 0,14  | 0,813405251 |
| Fbxw25 | 0,45  | 0,598582945 | -0,56 | 0,477855502 | -0,55 | 0,411266584 | 0,08  | 0,92289757  | -0,1  | 0,916173996 |
| Fbxw26 | 0,24  | 0,799145501 | -0,15 | 0,852181157 | 0,06  | 0,956894731 | 0,06  | 0,933070045 | -0,02 | 0,984125319 |
| Fbxw27 | 0,29  | 0,758636946 | 0,19  | 0,750160982 | 0,46  | 0,597763422 | 0,21  | 0,637136466 | 0,38  | 0,590339443 |
| Fbxw28 | -0,03 | 0,966775766 | -0,26 | 0,776548278 | 0,18  | 0,75601194  | 0,32  | 0,65051636  | -0,37 | 0,675958562 |
| Fbxw4  | -0,11 | 0,850952988 | -0,1  | 0,96095671  | 0,02  | 0,987302579 | -0,31 | 0,437168064 | 0,11  | 0,914459636 |
| Fbxw5  | 0,1   | 0,905289789 | -0,13 | 0,918041124 | 0,44  | 0,586255491 | -0,41 | 0,474127813 | -0,51 | 0,435285665 |
| Fbxw7  | -0,03 | 0,988414371 | -0,08 | 0,957659362 | 0,26  | 0,830639813 | 1,16  | 0,385593155 | 0,46  | 0,766559546 |
| Fbxw8  | -0,47 | 0,496008309 | -0,35 | 0,546908088 | 0,85  | 0,14251251  | 0,45  | 0,388229379 | 0,14  | 0,881613493 |
| Fbxw9  | 0,16  | 0,78476082  | -0,34 | 0,429168189 | 0,42  | 0,628853266 | 0,8   | 0,038147856 | -0,25 | 0,731865047 |
| Fcamr  | -0,21 | 0,739833092 | 0,16  | 0,853484596 | 0,2   | 0,73484021  | -0,22 | 0,726040578 | -0,19 | 0,788347987 |
| Fcer1a | -0,25 | 0,730385117 | 0,23  | 0,607209439 | -0,75 | 0,462643491 | -0,24 | 0,711645732 | -0,29 | 0,668411245 |
| Fcer1g | 0,68  | 0,413705714 | -0,43 | 0,256702217 | 0,76  | 0,732540375 | -0,25 | 0,775808151 | 0,34  | 0,694233384 |
| Fcer2a | 0,08  | 0,922118639 | -0,37 | 0,427518881 | 0,13  | 0,902124837 | 0,32  | 0,567607684 | -0,15 | 0,868602248 |
| Fcf1   | 0,64  | 0,333392802 | 0,03  | 0,980625749 | -0,31 | 0,802243994 | 0,48  | 0,383221502 | 0,32  | 0,588156778 |
| Fcgbp  | 0,35  | 0,604970874 | 0,72  | 0,187729631 | 0,8   | 0,206138966 | -0,48 | 0,439779004 | 0,12  | 0,93193727  |
| Fcgr1  | 0,17  | 0,767797797 | -0,06 | 0,982503153 | 0,12  | 0,920158784 | 0,67  | 0,273527801 | -0,02 | 0,986971861 |
| Fcgr2b | -0,18 | 0,776093771 | -0,33 | 0,836180813 | 1,09  | 0,469102587 | -0,09 | 0,967866794 | -0,14 | 0,960974478 |
| Fcgr3  | 0,22  | 0,673291416 | 0,15  | 0,703041962 | -0,05 | 0,979552161 | 0,4   | 0,426485837 | 0,19  | 0,80222716  |
| Fcgr4  | 2,73  | 0,029562109 | 0,37  | 0,818476671 | -0,04 | 0,990131157 | 0,78  | 0,426759693 | -0,41 | 0,791631916 |
| Fcgrt  | -0,49 | 0,341853862 | -0,6  | 0,414656674 | 0,82  | 0,186321498 | -1,31 | 0,068367199 | -0,68 | 0,268016026 |
| Fcho1  | -0,18 | 0,862322913 | 0,17  | 0,836568137 | -0,24 | 0,640703366 | -0,28 | 0,68581736  | -0,3  | 0,731948423 |
| Fcho2  | 0,6   | 0,202613112 | 0,35  | 0,560357477 | -0,98 | 0,054936135 | -0,23 | 0,661375903 | 0,38  | 0,561876467 |
| Fchsd1 | 0,24  | 0,688025638 | -0,01 | 0,996333613 | -0,14 | 0,891153267 | 0,31  | 0,578047707 | 0,14  | 0,882728747 |
| Fchsd2 | 0,71  | 0,261843547 | 1,13  | 0,091286822 | -0,98 | 0,04026369  | -0,44 | 0,410142767 | 0,93  | 0,098925698 |
| Fcmr   | 0,08  | 0,965482773 | -0,01 | 0,998237793 | -0,15 | 0,857466061 | -0,16 | 0,746580621 | -0,38 | 0,62978577  |
| Fcna   | 0,06  | 0,949190576 | 0,16  | 0,861862086 | 0,11  | 0,888921789 | 0,15  | 0,713470521 | 0,34  | 0,608004947 |
| Fcnaos | 0,12  | 0,903817676 | 0,06  | 0,911799284 | -0,12 | 0,887118162 | -0,44 | 0,577799811 | -0,56 | 0,525018839 |

|         |       |             |       |             |       |             |       |             |       |             |
|---------|-------|-------------|-------|-------------|-------|-------------|-------|-------------|-------|-------------|
| Fcnb    | -0,08 | 0,903666411 | -0,12 | 0,891749049 | -0,14 | 0,892342683 | 0,01  | 0,991962381 | 0,12  | 0,857890348 |
| Fcor    | -0,24 | 0,626864341 | -0,08 | 0,886149824 | 0,01  | 0,993379272 | 0,09  | 0,853713747 | 0,19  | 0,738260196 |
| Fcrl1   | -0,06 | 0,958512892 | 0,3   | 0,813150671 | -0,28 | 0,796418663 | 0,31  | 0,778817721 | 0,69  | 0,497340464 |
| Fcrl5   | 0,3   | 0,726734184 | 0,56  | 0,634920127 | -0,01 | 0,993379272 | 0,12  | 0,905471755 | 0,43  | 0,573111962 |
| Fcrl6   | 0,48  | 0,296031134 | 0,2   | 0,733708652 | -0,2  | 0,753966565 | -0,61 | 0,168352241 | -0,54 | 0,31115238  |
| Fcrla   | -0,05 | 0,923820085 | 0,29  | 0,626722509 | 0,05  | 0,950846671 | -0,08 | 0,902095386 | 0     | 0,997254437 |
| Fcrlb   | 0,35  | 0,54401985  | 0,21  | 0,650398116 | -0,39 | 0,402615209 | 0,07  | 0,876439802 | -0,17 | 0,773401088 |
| Fcrls   | 0,09  | 0,885622132 | -0,25 | 0,623534166 | 0,19  | 0,727548313 | -0,16 | 0,665775786 | 0,19  | 0,840036408 |
| Fdft1   | -0,13 | 0,843286304 | -0,04 | 0,938088718 | -0,33 | 0,678493958 | 1,2   | 0,236263762 | 0,6   | 0,643382128 |
| Fdps    | -0,9  | 0,105810346 | -0,85 | 0,179411793 | 1,16  | 0,046547259 | 1,79  | 0,07635937  | 0,64  | 0,626649014 |
| Fdx1    | -0,18 | 0,72711401  | 0     | 0,998513452 | 0,12  | 0,932866273 | 0,06  | 0,927769605 | 0,4   | 0,581802025 |
| Fdx1l   | -0,13 | 0,913425276 | -0,24 | 0,754806351 | -0,02 | 0,993379272 | 0,08  | 0,866760121 | -0,32 | 0,616797608 |
| Fdxacb1 | 0,25  | 0,846293825 | -0,19 | 0,885554925 | -0,25 | 0,78483076  | 0,6   | 0,335213853 | 0,29  | 0,737575231 |
| Fdxr    | -0,32 | 0,683361997 | 0,08  | 0,891749049 | -0,1  | 0,931220124 | 0,13  | 0,720329719 | 0,19  | 0,777561251 |
| Fech    | -0,57 | 0,434264464 | -0,29 | 0,619501651 | 0,44  | 0,530264141 | -0,28 | 0,687151118 | -0,29 | 0,726563756 |
| Fem1a   | -0,22 | 0,704720946 | -0,1  | 0,84954093  | 0,39  | 0,720938294 | -0,59 | 0,158995356 | -0,09 | 0,921873336 |
| Fem1b   | 0,11  | 0,786922555 | 0,09  | 0,84748177  | 0,4   | 0,428225462 | 0,51  | 0,393759175 | 0,32  | 0,825966687 |
| Fem1c   | 0,15  | 0,702017115 | -0,1  | 0,891930795 | -0,28 | 0,635267398 | 0     | 0,997598211 | -0,2  | 0,765809384 |
| Fen1    | -0,65 | 0,126593848 | -1,26 | 0,393560091 | 1,04  | 0,117009645 | 1,72  | 0,12792051  | -0,1  | 0,953297732 |
| Fendrr  | 1     | 0,135065204 | 0,63  | 0,508633526 | -1,04 | 0,047840679 | 0,94  | 0,048378136 | 0,05  | 0,959398085 |
| Fer     | 0,09  | 0,891309235 | 0,56  | 0,371327116 | 0,12  | 0,890632058 | -0,76 | 0,332144678 | -0,39 | 0,773401088 |
| Fer1l4  | -0,08 | 0,922118639 | 0     | 1           | -0,33 | 0,598179126 | 0,16  | 0,791524191 | -0,22 | 0,801385411 |
| Fer1l5  | 0,27  | 0,631056563 | 0,02  | 0,987282412 | -0,39 | 0,549446867 | -0,07 | 0,928387238 | -0,08 | 0,940878193 |
| Fer1l6  | -0,01 | 0,989017567 | -0,42 | 0,283703232 | -0,09 | 0,934813979 | 0,27  | 0,459812672 | 0,32  | 0,603018253 |
| Ferd3l  | 0,1   | 0,845437504 | -0,41 | 0,70753686  | -0,04 | 0,956445791 | 0,09  | 0,84134133  | -0,11 | 0,886573193 |
| Fermt1  | 0,05  | 0,960597621 | 0,07  | 0,937424389 | 2,29  | 0,042643426 | -0,11 | 0,838152293 | 0,31  | 0,546219184 |
| Fermt2  | 0,18  | 0,652819827 | 0,53  | 0,274438474 | -0,07 | 0,94550347  | -0,01 | 0,986768223 | -0,06 | 0,949545998 |
| Fermt3  | 0,28  | 0,761457464 | 0,2   | 0,782652703 | 0,26  | 0,702928613 | -1,21 | 0,017662145 | -0,43 | 0,39916841  |
| Fes     | 0,14  | 0,773342778 | 0,24  | 0,651611182 | -0,37 | 0,460945976 | 0,34  | 0,376631277 | 0,15  | 0,816729947 |
| Fetub   | -0,12 | 0,870127364 | -0,06 | 0,923044405 | -0,41 | 0,433585844 | 0,05  | 0,942269183 | 0,17  | 0,794517953 |
| Fev     | -0,13 | 0,810573349 | -0,05 | 0,955042983 | -0,12 | 0,853446278 | -0,33 | 0,453295658 | -0,7  | 0,12125802  |
| Fez1    | -0,19 | 0,779680378 | 0,34  | 0,422142263 | -0,08 | 0,938795886 | -0,56 | 0,594574312 | -0,34 | 0,820657685 |
| Fez2    | -0,24 | 0,631645901 | 0,26  | 0,605851161 | -0,59 | 0,340783964 | -0,05 | 0,920036779 | 0,24  | 0,763240477 |
| Fezf1   | 0,44  | 0,460654094 | 0,35  | 0,689645531 | -0,22 | 0,715497532 | -0,25 | 0,802667255 | -0,09 | 0,947437555 |
| Fezf2   | -0,15 | 0,764189777 | 0,23  | 0,640836969 | 0,2   | 0,811323099 | -0,34 | 0,282769221 | 0,3   | 0,616680786 |



|        |       |             |       |             |       |             |       |             |       |             |
|--------|-------|-------------|-------|-------------|-------|-------------|-------|-------------|-------|-------------|
| Ffar1  | 0,02  | 0,981777139 | 0,04  | 0,927029684 | 0,05  | 0,948637233 | 0,01  | 0,990868391 | -0,34 | 0,648800064 |
| Ffar2  | -0,2  | 0,712165686 | -0,12 | 0,852181157 | -0,38 | 0,525871472 | -0,1  | 0,778817721 | 0,3   | 0,591625293 |
| Ffar3  | 0,19  | 0,832696131 | 0,35  | 0,623534166 | -0,17 | 0,815429542 | 0,24  | 0,676390381 | 0,48  | 0,562781239 |
| Ffar4  | -0,01 | 0,990352291 | 0     | 1           | -0,06 | 0,943159909 | 0,29  | 0,407097145 | 0,15  | 0,819072786 |
| Fga    | 0,59  | 0,405822217 | 0,43  | 0,482624827 | 0,06  | 0,956894731 | -0,33 | 0,493282114 | 0,58  | 0,353136904 |
| Fgb    | -0,09 | 0,896971363 | -0,14 | 0,817367084 | 0,17  | 0,756462507 | 0,38  | 0,477988362 | -0,03 | 0,979392852 |
| Fgd1   | -0,81 | 0,325246268 | -0,81 | 0,416922779 | 0,72  | 0,582669192 | 0,72  | 0,347662455 | -1,19 | 0,058113053 |
| Fgd2   | 0,01  | 0,989925592 | -0,22 | 0,716668427 | -0,14 | 0,839250602 | 0,01  | 0,993869623 | -0,09 | 0,931519966 |
| Fgd3   | -0,02 | 0,986502463 | -0,6  | 0,56164513  | 0,29  | 0,543340672 | 0,41  | 0,647287835 | -0,38 | 0,738412365 |
| Fgd4   | -0,35 | 0,715610155 | -0,03 | 0,982519434 | 0,67  | 0,330719676 | -1,74 | 0,059827687 | -0,31 | 0,771253326 |
| Fgd5   | -0,45 | 0,40412179  | -0,22 | 0,573232957 | 0,25  | 0,671012215 | -0,59 | 0,160433339 | -0,58 | 0,269243865 |
| Fgd6   | 0,59  | 0,215401468 | 0,78  | 0,138647411 | -0,06 | 0,941551083 | -0,77 | 0,31202693  | -0,32 | 0,736118877 |
| Fgf1   | -0,89 | 0,213935959 | -0,29 | 0,853569707 | 0,43  | 0,704809914 | -2,97 | 0,003907268 | -1,62 | 0,032334627 |
| Fgf10  | -0,29 | 0,740529913 | -0,43 | 0,804897085 | 0,01  | 0,996946245 | -0,34 | 0,468562522 | -0,4  | 0,683162854 |
| Fgf11  | 0,11  | 0,892823025 | 0,61  | 0,527287574 | -0,04 | 0,975055092 | -1,23 | 0,211707097 | -0,4  | 0,673497091 |
| Fgf12  | -0,04 | 0,950532575 | -0,47 | 0,324369036 | 0,1   | 0,91378871  | -0,04 | 0,95582741  | 0,26  | 0,725387944 |
| Fgf13  | -0,08 | 0,929517868 | 0,36  | 0,641804702 | 0,14  | 0,919754592 | -0,22 | 0,715504244 | 0,3   | 0,703670469 |
| Fgf14  | 0,26  | 0,744748605 | -0,21 | 0,663652994 | 0,21  | 0,867571963 | 0,46  | 0,278622648 | 0,39  | 0,50321372  |
| Fgf15  | 0,05  | 0,948926586 | 0,25  | 0,654778612 | 0,19  | 0,775367269 | 0,15  | 0,848493224 | 0,15  | 0,891925115 |
| Fgf16  | 0,27  | 0,631448839 | 0,05  | 0,918167746 | 0,39  | 0,533235851 | -0,13 | 0,864379203 | -0,28 | 0,723036695 |
| Fgf17  | 0,08  | 0,927266332 | 0,25  | 0,65931908  | 0,05  | 0,963221639 | -0,16 | 0,694425503 | -0,04 | 0,976743304 |
| Fgf18  | -0,2  | 0,803737003 | -0,39 | 0,594415097 | 0,1   | 0,909963525 | 0,18  | 0,87630843  | 0,09  | 0,954892212 |
| Fgf2   | -0,03 | 0,972315612 | -0,05 | 0,966717367 | -0,29 | 0,589103152 | 0,31  | 0,348518558 | 0,33  | 0,708533352 |
| Fgf20  | 0,35  | 0,715991706 | -0,01 | 0,998237793 | -0,18 | 0,777810365 | 0,11  | 0,853419763 | 0,25  | 0,672033361 |
| Fgf21  | 0,15  | 0,845495686 | -0,06 | 0,956049982 | 0,42  | 0,584107565 | 0,26  | 0,770764705 | 0,33  | 0,712793529 |
| Fgf22  | 0,34  | 0,631796741 | 0,05  | 0,941943807 | -0,21 | 0,755403453 | -0,06 | 0,926553723 | -0,01 | 0,989190533 |
| Fgf23  | -0,6  | 0,458670096 | -0,19 | 0,909329669 | 1,98  | 0,151177488 | 2,07  | 0,027401066 | -0,07 | 0,940438527 |
| Fgf2os | 0,16  | 0,661467528 | -0,01 | 0,996113371 | -0,19 | 0,759399009 | 0,04  | 0,936482652 | 0,12  | 0,870978345 |
| Fgf3   | -0,14 | 0,827442439 | -0,39 | 0,670902144 | -0,12 | 0,90672161  | 0,39  | 0,450283107 | 0,12  | 0,889884382 |
| Fgf4   | 0,03  | 0,964894892 | 0,17  | 0,818072947 | -0,53 | 0,575337783 | 0,35  | 0,591408949 | 0,31  | 0,729208209 |
| Fgf5   | 0,51  | 0,460585665 | -0,02 | 0,99074556  | -0,01 | 0,993379272 | -0,01 | 0,992906132 | -0,26 | 0,83730774  |
| Fgf6   | 0,4   | 0,599148934 | 0,11  | 0,883093763 | 0,13  | 0,788263753 | -0,38 | 0,741646038 | -0,25 | 0,884640084 |
| Fgf7   | -0,08 | 0,943079514 | -0,14 | 0,716769193 | -0,23 | 0,740579016 | -0,3  | 0,458672547 | -0,01 | 0,990633766 |
| Fgf8   | 0,03  | 0,976495648 | 0,05  | 0,978904487 | 0,25  | 0,783583806 | -0,15 | 0,884326814 | -0,55 | 0,504039199 |
| Fgf9   | 0,43  | 0,735674068 | 0,74  | 0,311099792 | -0,31 | 0,718059453 | -0,16 | 0,809775652 | 0,98  | 0,20045565  |

|          |       |             |       |             |       |             |       |             |       |             |
|----------|-------|-------------|-------|-------------|-------|-------------|-------|-------------|-------|-------------|
| Fgfbp1   | 0,17  | 0,705404186 | 0,48  | 0,654899328 | 0,64  | 0,415588175 | -0,1  | 0,841354324 | 0,15  | 0,871038748 |
| Fgfbp3   | 0,06  | 0,898269435 | 0,07  | 0,914952205 | -0,09 | 0,938795886 | -0,17 | 0,653513975 | -0,08 | 0,927536545 |
| Fgfr1    | 0,04  | 0,95538722  | -0,16 | 0,871579451 | 0,37  | 0,530587266 | 1,57  | 0,030423771 | -0,54 | 0,290772983 |
| Fgfr1op  | -0,44 | 0,572297458 | -0,05 | 0,906201358 | 0,43  | 0,645334197 | -0,05 | 0,962670023 | 0,12  | 0,931519966 |
| Fgfr1op2 | 0,45  | 0,291011995 | 0,05  | 0,951418475 | 0,37  | 0,389841181 | 0,39  | 0,480319034 | -0,11 | 0,91314596  |
| Fgfr2    | 0,24  | 0,53293469  | -0,13 | 0,946885634 | 0,02  | 0,991018097 | -0,72 | 0,600327117 | -0,01 | 0,9939542   |
| Fgfr3    | -0,58 | 0,421174508 | -0,03 | 0,979002922 | 0,25  | 0,830685724 | -4,9  | 0,002324024 | -1,1  | 0,107059332 |
| Fgfr4    | 0,03  | 0,976574175 | 0,27  | 0,585443341 | -0,23 | 0,721952929 | -0,05 | 0,938689944 | 0,29  | 0,655814782 |
| Fgfrl1   | -0,28 | 0,766194359 | 0,06  | 0,954343854 | 0,5   | 0,650169259 | -1,81 | 0,028584673 | 0,12  | 0,911850421 |
| Fgg      | -0,34 | 0,471994969 | -0,07 | 0,891533665 | -0,09 | 0,914301036 | -0,17 | 0,73574774  | 0,76  | 0,223294439 |
| Fggy     | -0,01 | 0,995091369 | 0,29  | 0,785427558 | -0,61 | 0,26430961  | 0,72  | 0,313562807 | 0,57  | 0,489004857 |
| Fgl1     | 0,06  | 0,94881239  | 0,34  | 0,705747563 | -0,33 | 0,614308195 | 0,08  | 0,957432042 | 0,09  | 0,951033938 |
| Fgl2     | 0,03  | 0,98225675  | 0,46  | 0,48761393  | -0,92 | 0,204247489 | -1,73 | 0,013275034 | 0,27  | 0,605541773 |
| Fgr      | -0,17 | 0,892141122 | 0,19  | 0,927582737 | -0,09 | 0,953951069 | -0,57 | 0,410999285 | -0,83 | 0,312830548 |
| Fh1      | -0,17 | 0,80619961  | -0,34 | 0,40486209  | 0,29  | 0,80210446  | 0,15  | 0,754318983 | -0,03 | 0,97884055  |
| Fhad1    | 0,02  | 0,973805829 | 0,55  | 0,514781187 | -0,37 | 0,618146048 | -0,1  | 0,927360713 | 0,28  | 0,760555206 |
| Fhad1os1 | -0,06 | 0,926316023 | -0,25 | 0,566337065 | -0,04 | 0,959140658 | 0,27  | 0,385078342 | -0,04 | 0,961406182 |
| Fhad1os2 | 0,11  | 0,807062435 | 0,03  | 0,959673534 | 0     | 0,997677514 | -0,01 | 0,991962381 | 0,18  | 0,843351909 |
| Fhdc1    | 0,49  | 0,644052936 | -0,6  | 0,293906064 | 0,04  | 0,981848891 | -0,77 | 0,363119525 | -0,53 | 0,568291477 |
| Fhit     | 0,18  | 0,819634768 | 0,11  | 0,8897442   | 0,17  | 0,864691151 | 0,16  | 0,789717483 | 0,15  | 0,885777129 |
| Fhitos   | 0,26  | 0,634740228 | -0,24 | 0,606999442 | -0,21 | 0,750874251 | -0,03 | 0,968750378 | -0,13 | 0,910085178 |
| Fhl1     | -0,3  | 0,412428444 | 0,03  | 0,983651301 | 0,12  | 0,904239687 | -1,58 | 0,031683046 | -0,28 | 0,74732051  |
| Fhl2     | -0,22 | 0,886889675 | 0,08  | 0,932292974 | 0,89  | 0,270313252 | 2,15  | 0,006245423 | 0,17  | 0,814438115 |
| Fhl3     | -0,56 | 0,422033372 | 0,32  | 0,732044571 | 0,91  | 0,044715282 | 0,89  | 0,164734522 | 0,2   | 0,828774079 |
| Fhl4     | -0,55 | 0,244269955 | 1,01  | 0,137833549 | 0,28  | 0,686394583 | -0,05 | 0,932800758 | -0,21 | 0,788112596 |
| Fhl5     | 0,15  | 0,954349573 | 0,02  | 0,999395995 | -0,23 | 0,861307315 | -0,33 | 0,817408754 | -0,17 | 0,940438527 |
| Fhod1    | -0,32 | 0,54401985  | -0,47 | 0,409234346 | 0,19  | 0,809137779 | 0,29  | 0,42854479  | -0,49 | 0,287590871 |
| Fhod3    | -0,09 | 0,872280465 | -0,08 | 0,919873208 | -0,1  | 0,930193129 | 0     | 1           | 0,02  | 0,983469081 |
| Fibcd1   | -0,07 | 0,942331022 | 0     | 1           | -0,04 | 0,97548193  | 0,1   | 0,813465331 | 0,43  | 0,447019099 |
| Fibin    | -0,14 | 0,867243066 | 0     | 1           | 0,27  | 0,811424918 | -2,09 | 0,012590736 | -0,22 | 0,735052158 |
| Fibp     | -0,18 | 0,826699935 | -0,52 | 0,261045839 | 0,33  | 0,674253263 | 0,06  | 0,911768604 | 0,27  | 0,669276243 |
| Ficd     | 0,13  | 0,892363276 | -0,1  | 0,880473303 | 0,51  | 0,347983286 | 0,35  | 0,686518818 | -0,08 | 0,951471487 |
| Fig4     | -0,76 | 0,376983801 | 0,13  | 0,859954464 | 0,01  | 0,995237931 | 0,32  | 0,838352831 | 0,13  | 0,953764773 |
| Figf     | 0,08  | 0,923180948 | 0,22  | 0,717526173 | 0,18  | 0,877598693 | -1,62 | 0,284265116 | -0,45 | 0,778593926 |
| Figla    | 0,03  | 0,973883276 | -0,07 | 0,903504389 | 0,09  | 0,936097567 | -0,56 | 0,490353906 | -0,16 | 0,874829878 |

|         |       |             |       |             |       |             |       |             |       |             |
|---------|-------|-------------|-------|-------------|-------|-------------|-------|-------------|-------|-------------|
| Fig     | 0,07  | 0,94815841  | 0,29  | 0,902292328 | 0,46  | 0,689298982 | -0,55 | 0,42636999  | 0,21  | 0,876418697 |
| Fignl1  | -0,58 | 0,481307815 | -1,18 | 0,272116352 | 1,1   | 0,271482188 | 1,36  | 0,058876224 | 0,02  | 0,981439632 |
| Fignl2  | -0,29 | 0,488619512 | -0,21 | 0,683904078 | -0,03 | 0,967930981 | -0,47 | 0,300023863 | -0,62 | 0,351536668 |
| Filip1  | 0,09  | 0,882500171 | 0,73  | 0,212178348 | -0,91 | 0,103030088 | 1,5   | 0,009990534 | 0,12  | 0,860591136 |
| Filip11 | 0,22  | 0,861284096 | -0,07 | 0,957659362 | 0,43  | 0,402409115 | 0,1   | 0,911768604 | 0,41  | 0,577808038 |
| Fip1l1  | -0,2  | 0,657776504 | -0,07 | 0,933320126 | 0,08  | 0,914134206 | -0,05 | 0,9579816   | -0,33 | 0,666758661 |
| Firre   | 0,22  | 0,752554638 | -0,01 | 0,998513452 | 0,06  | 0,946267064 | 0,04  | 0,973645539 | 0,48  | 0,591625293 |
| Fis1    | 0,18  | 0,660482793 | -0,11 | 0,936937668 | 0,04  | 0,972332753 | -0,22 | 0,718433562 | -0,06 | 0,937700889 |
| Fitm1   | 0,2   | 0,771549051 | -0,05 | 0,949364802 | 0     | 0,997394645 | 0,28  | 0,473346641 | -0,13 | 0,859735946 |
| Fitm2   | -0,69 | 0,340214072 | -0,16 | 0,781665479 | 0,79  | 0,43706094  | -0,11 | 0,891773132 | 0,1   | 0,92741476  |
| Fiz1    | 0,25  | 0,761457464 | 0,16  | 0,894400782 | 0,7   | 0,479303047 | -0,2  | 0,873812847 | 0,23  | 0,858119548 |
| Fjx1    | 0,47  | 0,655961186 | 1,61  | 0,087315688 | -0,72 | 0,475398917 | 1,13  | 0,483554745 | 0,98  | 0,513517573 |
| Fkbp10  | -0,66 | 0,132779189 | -0,47 | 0,276578805 | 0,88  | 0,041705515 | 2,28  | 0,008714719 | -0,57 | 0,330314966 |
| Fkbp11  | -0,57 | 0,507090099 | -0,85 | 0,271040583 | 0,92  | 0,184164925 | 1,2   | 0,173600687 | -0,62 | 0,694233384 |
| Fkbp14  | -0,88 | 0,319558444 | -0,93 | 0,531718087 | 1,34  | 0,140160536 | 0,82  | 0,24812886  | -1,57 | 0,096377216 |
| Fkbp15  | 0,03  | 0,966775766 | 0,39  | 0,450076222 | -0,02 | 0,979937677 | -0,31 | 0,487885164 | 0,41  | 0,462558109 |
| Fkbp1a  | 0,49  | 0,19218105  | 0,38  | 0,459417799 | -0,13 | 0,822554757 | 1,08  | 0,12167813  | 0,28  | 0,726351163 |
| Fkbp1b  | -0,42 | 0,600684822 | 0,03  | 0,972336944 | 0,79  | 0,412477493 | 1,01  | 0,224187141 | -0,05 | 0,982718    |
| Fkbp2   | 0,1   | 0,84228513  | -0,06 | 0,945143056 | 0,49  | 0,520763362 | 0,04  | 0,961123444 | 0,29  | 0,714465859 |
| Fkbp3   | -0,04 | 0,976200957 | -0,46 | 0,424068004 | 0,61  | 0,215429632 | -0,01 | 0,991962381 | -0,03 | 0,977236465 |
| Fkbp4   | -0,26 | 0,740529913 | -0,02 | 0,983071427 | 0,68  | 0,323246778 | 0     | 1           | -0,09 | 0,947254077 |
| Fkbp5   | -0,71 | 0,396536316 | -0,88 | 0,143690114 | -0,15 | 0,909371204 | -1,08 | 0,035837218 | -2,14 | 0,01166388  |
| Fkbp6   | 0,2   | 0,685826767 | 0,35  | 0,498533834 | 0,09  | 0,909975745 | -0,07 | 0,877053477 | 0,15  | 0,845218636 |
| Fkbp7   | -0,55 | 0,214430522 | -1    | 0,098272554 | 0,94  | 0,093891091 | 0,12  | 0,903739255 | -0,73 | 0,334365666 |
| Fkbp8   | -0,12 | 0,785669218 | -0,13 | 0,745921616 | 0,41  | 0,503819492 | 0,15  | 0,689373137 | -0,15 | 0,824818547 |
| Fkbp9   | -0,54 | 0,249044729 | -0,53 | 0,210141501 | 0,96  | 0,03090075  | 0,72  | 0,093966892 | -1,03 | 0,155052166 |
| Fkbp1   | 0,07  | 0,925019201 | 0,1   | 0,929289366 | 0,12  | 0,876684089 | -0,34 | 0,592708932 | -0,24 | 0,689031841 |
| Fkrp    | -0,11 | 0,903817676 | 0,13  | 0,78836254  | 0,32  | 0,639976167 | 0,33  | 0,694589754 | 0,3   | 0,765327693 |
| Fktn    | 0,04  | 0,976574175 | 0,41  | 0,783325809 | 0,21  | 0,797422121 | -1    | 0,0240719   | -0,57 | 0,429106643 |
| Flad1   | -0,56 | 0,593908972 | 0,2   | 0,753858951 | 0,55  | 0,225514917 | 0,15  | 0,847752714 | -0,28 | 0,732128489 |
| Flcn    | -0,3  | 0,773711275 | -0,06 | 0,913622205 | 0,39  | 0,733763511 | -0,16 | 0,810891431 | 0,18  | 0,836697963 |
| Flg2    | -0,3  | 0,677689915 | 0,22  | 0,745130453 | 0,15  | 0,909729307 | 0,01  | 0,992365775 | 0,65  | 0,537393108 |
| Fli1    | -0,28 | 0,480319644 | -0,03 | 0,958856577 | -0,09 | 0,908390194 | 0,05  | 0,916072825 | -0,08 | 0,932627212 |
| Flii    | 0,2   | 0,719048526 | -0,08 | 0,920577656 | -0,05 | 0,957114647 | -0,15 | 0,823146103 | -0,12 | 0,890833196 |
| Flna    | -0,51 | 0,241909582 | -0,42 | 0,312568948 | 0,55  | 0,229663854 | 1,21  | 0,030099147 | -0,55 | 0,344052279 |

|         |       |             |       |             |       |             |       |             |       |             |
|---------|-------|-------------|-------|-------------|-------|-------------|-------|-------------|-------|-------------|
| Flnb    | 0,01  | 0,98456417  | 0,24  | 0,625784044 | -0,3  | 0,669266652 | 0,61  | 0,122795965 | 0,2   | 0,736140152 |
| Flnc    | -0,57 | 0,176335721 | -0,1  | 0,912535732 | 0,21  | 0,806044178 | 0,76  | 0,118061566 | -0,4  | 0,571831883 |
| Flot1   | 0,05  | 0,947117278 | 0,58  | 0,277253387 | -0,48 | 0,474169312 | -0,1  | 0,8556361   | 0,19  | 0,769805654 |
| Flot2   | -0,25 | 0,560877216 | 0,41  | 0,384132053 | -0,21 | 0,736837174 | 0,33  | 0,665063395 | 0,28  | 0,764025473 |
| Flrt1   | 0,12  | 0,859600103 | -0,11 | 0,839789639 | -0,1  | 0,904057901 | -1,37 | 0,017662145 | -0,27 | 0,752187547 |
| Flrt2   | 0,07  | 0,922935213 | -0,06 | 0,973541589 | 0,24  | 0,873457545 | -0,87 | 0,283426349 | 1,04  | 0,177475386 |
| Flrt3   | -0,31 | 0,731058317 | 0,19  | 0,859954464 | 0,37  | 0,902086463 | -5,21 | 0,005240816 | -0,12 | 0,923947922 |
| Flt1    | 0,19  | 0,66609472  | -0,16 | 0,785128233 | 0,29  | 0,802795561 | -0,59 | 0,090583584 | -0,42 | 0,331553232 |
| Flt3    | 0,05  | 0,952599412 | -0,03 | 0,988550087 | 0,57  | 0,37970041  | 0,23  | 0,678052595 | -0,35 | 0,760042789 |
| Flt3l   | -0,54 | 0,363136841 | 0,32  | 0,600622048 | -0,72 | 0,186321498 | -1,51 | 0,033012847 | -0,02 | 0,984724142 |
| Flt4    | -0,65 | 0,153824107 | -0,96 | 0,205273528 | 0,26  | 0,693655482 | -0,41 | 0,353723948 | -0,49 | 0,402639042 |
| Flywch1 | -0,2  | 0,676800971 | -0,12 | 0,855713502 | -0,07 | 0,952888594 | -0,05 | 0,957596559 | -0,03 | 0,979456872 |
| Flywch2 | 0,02  | 0,979130815 | -0,2  | 0,872939051 | 0,12  | 0,948712735 | -0,21 | 0,812048135 | 0,21  | 0,871220493 |
| Fmn1    | 0,22  | 0,671160826 | -0,08 | 0,94576641  | 0,84  | 0,411884367 | 1,33  | 0,386397947 | -1,34 | 0,332695011 |
| Fmn2    | 0,03  | 0,965991176 | 0,19  | 0,790185055 | 0,16  | 0,837806957 | -0,25 | 0,632632809 | 0,13  | 0,906031862 |
| Fmnl1   | -0,44 | 0,374444487 | -0,5  | 0,339208867 | -0,07 | 0,956570063 | 0,71  | 0,372816893 | -0,08 | 0,952462776 |
| Fmnl2   | 0,69  | 0,149941264 | 1,44  | 0,098105096 | -1,12 | 0,017748885 | -0,89 | 0,260503826 | 0,68  | 0,338128716 |
| Fmnl3   | -0,92 | 0,037391759 | -0,47 | 0,279092572 | 0,56  | 0,464639399 | -0,29 | 0,438416463 | -0,5  | 0,324281141 |
| Fmo1    | 0,24  | 0,847575977 | -0,86 | 0,370515616 | -0,4  | 0,702677589 | -4,52 | 0,003907268 | -0,64 | 0,316401979 |
| Fmo2    | 0,13  | 0,840175252 | -0,46 | 0,806456132 | 0,31  | 0,864364089 | -2,89 | 0,017221956 | -0,59 | 0,794001669 |
| Fmo3    | 0,63  | 0,155456708 | 0,49  | 0,622603765 | -0,21 | 0,683917899 | -0,11 | 0,908141892 | -0,01 | 0,992370267 |
| Fmo4    | 0,07  | 0,895278749 | -0,14 | 0,87464113  | -0,22 | 0,76031147  | 0,02  | 0,98283761  | 0,23  | 0,73108884  |
| Fmo5    | -0,02 | 0,982597772 | 0,11  | 0,943713379 | 0,47  | 0,492721892 | -1,84 | 0,056047988 | -0,59 | 0,697189886 |
| Fmo6    | 0,16  | 0,803761785 | 0,07  | 0,956555856 | 0,15  | 0,862553328 | 0,33  | 0,688018639 | 0,15  | 0,939448119 |
| Fmo9    | -0,22 | 0,642618049 | 0,02  | 0,981441793 | -0,03 | 0,978012085 | 0,11  | 0,791386623 | 0,07  | 0,933759514 |
| Fmod    | -0,1  | 0,840909921 | -0,17 | 0,910688765 | -0,16 | 0,824306509 | 0,06  | 0,929170881 | -0,07 | 0,959398085 |
| Fmr1    | -0,03 | 0,960887583 | -0,07 | 0,901000778 | 0,46  | 0,370399672 | 0,1   | 0,836168899 | 0,62  | 0,188085512 |
| Fmr1nb  | -0,34 | 0,687662951 | 0,27  | 0,912340934 | -0,07 | 0,950796904 | 0,33  | 0,789353761 | -0,1  | 0,928724353 |
| Fmr1os  | 0,19  | 0,775168019 | 0,31  | 0,727848017 | -0,32 | 0,814575035 | 0,05  | 0,967866794 | -0,05 | 0,974553568 |
| Fn1     | 0,08  | 0,926181408 | 0,6   | 0,49252156  | -0,02 | 0,984778342 | 2,19  | 0,018624038 | -0,99 | 0,137555956 |
| Fn3k    | 0,16  | 0,823402057 | 0,33  | 0,555336098 | 0,07  | 0,929871006 | -0,61 | 0,394939896 | -0,27 | 0,712968816 |
| Fn3krp  | -0,25 | 0,830575431 | 0,17  | 0,888759454 | -0,19 | 0,747847718 | -0,44 | 0,473389984 | -0,01 | 0,992370267 |
| Fnbp1   | -0,6  | 0,236802372 | -0,15 | 0,703923817 | 0,2   | 0,828321132 | -0,2  | 0,749306304 | -0,27 | 0,724432778 |
| Fnbp1l  | -0,59 | 0,350338827 | -0,22 | 0,818072947 | 0,71  | 0,239210313 | 0,25  | 0,601996277 | 0,34  | 0,497190175 |
| Fnbp4   | 0,4   | 0,389268664 | 0,22  | 0,695689103 | -0,38 | 0,618146048 | -0,22 | 0,68319623  | 0,59  | 0,311800369 |

|         |       |             |       |             |       |             |       |             |       |             |
|---------|-------|-------------|-------|-------------|-------|-------------|-------|-------------|-------|-------------|
| Fnd3c2  | -0,05 | 0,975506993 | -0,51 | 0,702811088 | -0,04 | 0,97548193  | 0,12  | 0,905878152 | -0,56 | 0,622910734 |
| Fndc1   | -0,34 | 0,713168668 | 0,03  | 0,977697653 | 0,71  | 0,257583104 | -1,07 | 0,088402291 | -0,56 | 0,666758661 |
| Fndc3a  | 0,53  | 0,278797445 | 0,87  | 0,10752682  | -0,06 | 0,94178334  | 0,19  | 0,658281831 | 0,56  | 0,253125485 |
| Fndc3b  | -0,32 | 0,568104198 | -0,02 | 0,993398521 | 0,34  | 0,514610288 | 0,39  | 0,37242302  | -0,66 | 0,257751018 |
| Fndc3c1 | 0,49  | 0,542987597 | -0,43 | 0,518998821 | 0,13  | 0,848330689 | 0     | 0,997105708 | -0,45 | 0,623046105 |
| Fndc4   | -0,35 | 0,560461791 | -0,68 | 0,620803951 | -0,73 | 0,190867064 | -0,3  | 0,747142453 | -0,15 | 0,885872093 |
| Fndc5   | 0,17  | 0,733471786 | 0,21  | 0,750704279 | 0,08  | 0,920858287 | -0,03 | 0,9624906   | 0,08  | 0,933759514 |
| Fndc7   | -0,09 | 0,899685401 | -0,03 | 0,983028198 | 0,05  | 0,956232887 | 0,33  | 0,504754586 | 0,26  | 0,720844381 |
| Fndc8   | -0,6  | 0,260729979 | -0,36 | 0,539700767 | 0,03  | 0,983471086 | -0,21 | 0,604500517 | -0,2  | 0,808378459 |
| Fndc9   | -0,46 | 0,390035453 | -0,1  | 0,86297915  | 0,21  | 0,772008734 | 0,13  | 0,755463253 | 0,11  | 0,887367245 |
| Fnip1   | 0,66  | 0,180862229 | 0,57  | 0,35381781  | -0,35 | 0,683285574 | -0,17 | 0,792371216 | 0,4   | 0,579739537 |
| Fnip2   | -0,28 | 0,613990129 | -0,24 | 0,676903594 | 0,25  | 0,806086881 | -0,39 | 0,58089059  | -0,35 | 0,662029815 |
| Fnta    | -0,39 | 0,519988186 | -0,19 | 0,785573503 | -0,48 | 0,473544331 | -0,05 | 0,931477012 | 0,17  | 0,835191    |
| Fntb    | -0,2  | 0,882500171 | -0,43 | 0,529278426 | 1,17  | 0,062420645 | 0,03  | 0,981194569 | -0,9  | 0,442579293 |
| Focad   | 0,04  | 0,966775766 | -0,61 | 0,336808418 | -0,08 | 0,951601163 | 0,88  | 0,05155344  | 0,08  | 0,954657649 |
| Folh1   | 0,3   | 0,638735898 | -0,02 | 0,989521494 | -0,16 | 0,844493581 | -0,27 | 0,679648561 | 0,27  | 0,887083513 |
| Folr1   | 0,15  | 0,841140165 | 0,52  | 0,514495077 | 0,46  | 0,436827113 | -0,36 | 0,626900741 | 0,37  | 0,765809384 |
| Folr2   | -0,05 | 0,9516752   | 0,05  | 0,97421065  | 0,16  | 0,909371204 | 0,45  | 0,533941098 | 0,46  | 0,579739537 |
| Fopnl   | -0,29 | 0,619738681 | 0     | 1           | -0,17 | 0,847402011 | 0,23  | 0,688163185 | -0,14 | 0,877833    |
| Fos     | -0,1  | 0,89763852  | 0,62  | 0,17844863  | -0,57 | 0,294623199 | -1,46 | 0,016028907 | -0,29 | 0,635612479 |
| Fosb    | -0,06 | 0,890974575 | -0,1  | 0,842663656 | -0,02 | 0,986912078 | -0,46 | 0,18825829  | -0,32 | 0,520948388 |
| Fosl1   | 0,12  | 0,778723429 | -0,07 | 0,932628106 | 0,35  | 0,647988621 | -0,16 | 0,704265173 | 0,17  | 0,788347987 |
| Fosl2   | -0,07 | 0,909164786 | 0,3   | 0,540905261 | -0,27 | 0,607390293 | -0,45 | 0,391807778 | -0,16 | 0,86809582  |
| Foxa1   | -0,02 | 0,980474127 | -0,08 | 0,955872959 | 1,1   | 0,112229182 | 0,12  | 0,871577562 | 0,2   | 0,768768194 |
| Foxa2   | 0,28  | 0,620457452 | 0,1   | 0,855632384 | 0,23  | 0,777417583 | -0,14 | 0,807661309 | 0,22  | 0,821140509 |
| Foxa3   | -0,06 | 0,925704402 | 0,15  | 0,764289173 | 0,25  | 0,591404136 | 0,01  | 0,991001566 | 0,1   | 0,919394046 |
| Foxb1   | 0,22  | 0,718189688 | 0,4   | 0,732847182 | -0,33 | 0,572407103 | 0,38  | 0,678345435 | 0,05  | 0,961749007 |
| Foxb2   | -0,31 | 0,621078695 | 0,1   | 0,924342001 | -0,01 | 0,991240121 | 0,14  | 0,828256292 | 0,07  | 0,952296554 |
| Foxc1   | -0,12 | 0,828767158 | 0,98  | 0,154145842 | -0,42 | 0,590832576 | -1,13 | 0,036323984 | 0,5   | 0,587915673 |
| Foxc2   | -1,06 | 0,06288618  | -0,57 | 0,678357594 | -0,33 | 0,69017039  | -0,85 | 0,149106695 | -0,02 | 0,979456872 |
| Foxd1   | -0,02 | 0,963914207 | -0,1  | 0,906267371 | -0,09 | 0,896181325 | -0,16 | 0,697336477 | 0,05  | 0,948206913 |
| Foxd2   | 0,13  | 0,808764987 | 0,06  | 0,91194747  | -0,25 | 0,646965864 | 0,2   | 0,809049387 | -0,49 | 0,469148703 |
| Foxd2os | -0,16 | 0,818712946 | 0,09  | 0,910688765 | 0,04  | 0,961293403 | 2,06  | 0,007738248 | 0,06  | 0,940438527 |
| Foxd3   | -0,02 | 0,984078212 | 0,11  | 0,815386751 | -0,07 | 0,941561196 | 0,13  | 0,775089937 | 0,06  | 0,957289526 |
| Foxd4   | 0,21  | 0,614796173 | -0,04 | 0,943915456 | 0,18  | 0,772397144 | 0,1   | 0,922740736 | -0,31 | 0,735152891 |

|         |       |             |       |             |       |             |       |             |       |             |
|---------|-------|-------------|-------|-------------|-------|-------------|-------|-------------|-------|-------------|
| Foxe1   | -0,13 | 0,782804787 | -0,04 | 0,953393305 | -0,37 | 0,545431283 | -0,05 | 0,938689944 | -0,2  | 0,784811378 |
| Foxe3   | -0,01 | 0,992406613 | 0,11  | 0,909329669 | -0,12 | 0,899913569 | 0,08  | 0,900009358 | -0,32 | 0,625410836 |
| Foxf1   | 0,04  | 0,959218841 | 0,77  | 0,197230146 | -0,27 | 0,793014016 | 1,62  | 0,054297321 | 0,9   | 0,307816931 |
| Foxf2   | 0,23  | 0,683444889 | -0,3  | 0,537538565 | 0,55  | 0,324321658 | 0,59  | 0,151396301 | -0,13 | 0,836715889 |
| Foxg1   | -0,2  | 0,717407143 | -0,63 | 0,493525791 | 0,75  | 0,404711324 | 0,18  | 0,758588473 | 0,7   | 0,276013963 |
| Foxh1   | -0,05 | 0,928805539 | -0,03 | 0,987777411 | 0,13  | 0,824709389 | -0,26 | 0,594939648 | -0,19 | 0,789332757 |
| Foxi1   | 0,3   | 0,663119768 | -0,17 | 0,802788292 | -0,29 | 0,715403033 | 0,22  | 0,623646123 | 0,1   | 0,933741854 |
| Foxi2   | 0,28  | 0,657001715 | 0,19  | 0,790939978 | -0,18 | 0,723987482 | 0,09  | 0,908141892 | 0,32  | 0,593298551 |
| Foxi3   | -0,14 | 0,802427928 | 0,2   | 0,747707816 | 0,26  | 0,586027392 | -0,03 | 0,942937835 | 0,07  | 0,937593816 |
| Foxj1   | 0,21  | 0,771904131 | -0,19 | 0,89081665  | 0,19  | 0,894339966 | 0,57  | 0,226602277 | 0,58  | 0,370777063 |
| Foxj2   | -0,19 | 0,703606438 | 0,21  | 0,776548278 | -0,08 | 0,910002544 | -0,69 | 0,110770334 | -0,45 | 0,392386258 |
| Foxj3   | 0,23  | 0,777335496 | 0,29  | 0,775155136 | -0,35 | 0,598076555 | -0,24 | 0,674639078 | 0,02  | 0,983494749 |
| Foxk1   | -0,04 | 0,94881239  | 0,44  | 0,612941322 | 0,21  | 0,804784019 | -0,32 | 0,46505673  | 0,05  | 0,961406182 |
| Foxk2   | -0,39 | 0,506916689 | -0,44 | 0,323278688 | 0,19  | 0,788878413 | 0,75  | 0,188526724 | -0,12 | 0,916173996 |
| Foxl1   | -0,08 | 0,906885053 | -0,1  | 0,881113709 | 0     | 0,999931921 | -0,05 | 0,910189972 | -0,06 | 0,940092696 |
| Foxl2   | 0,02  | 0,977336014 | -0,04 | 0,947107147 | -0,01 | 0,993686224 | 0,19  | 0,709570719 | 0,05  | 0,964198589 |
| Foxl2os | -0,42 | 0,560461791 | -0,11 | 0,924490675 | -0,07 | 0,939921221 | 0,15  | 0,742815987 | 0,01  | 0,986917751 |
| Foxm1   | -0,9  | 0,179001759 | -1,41 | 0,12690808  | 1,63  | 0,161469949 | 2,35  | 0,020759346 | -0,34 | 0,77361261  |
| Foxn1   | -0,28 | 0,59710379  | 0,58  | 0,452735303 | 0,06  | 0,953917674 | -0,4  | 0,437001704 | -0,02 | 0,982965561 |
| Foxn2   | 0,02  | 0,982721718 | 0,1   | 0,862559271 | 0,23  | 0,740194064 | 0,26  | 0,416798746 | 0,09  | 0,913553402 |
| Foxn3   | 0,16  | 0,768809729 | 0,26  | 0,716661568 | -0,13 | 0,911506558 | -1,07 | 0,017534652 | -0,18 | 0,74324214  |
| Foxn4   | 0,13  | 0,89763852  | 0,07  | 0,948409105 | 0     | 0,997268369 | -0,41 | 0,216621773 | -0,02 | 0,980961333 |
| Foxo1   | -0,34 | 0,341939047 | 0,05  | 0,921584809 | 0,09  | 0,904057901 | -0,14 | 0,730447684 | -0,53 | 0,509794733 |
| Foxo3   | -0,32 | 0,418088138 | -0,26 | 0,70423886  | -0,11 | 0,857676485 | -0,68 | 0,083210552 | -0,84 | 0,065968102 |
| Foxo4   | -0,2  | 0,816465857 | -0,71 | 0,587634717 | -0,01 | 0,993379272 | -0,15 | 0,683342816 | -0,05 | 0,969928296 |
| Foxo6   | 0,23  | 0,701414945 | -0,34 | 0,582976316 | -0,04 | 0,967767582 | 0,12  | 0,74962134  | 0,29  | 0,697757911 |
| Foxo6os | 0,14  | 0,757781948 | 0,1   | 0,825662099 | -0,16 | 0,816883729 | -0,09 | 0,820103742 | 0,23  | 0,688557987 |
| Foxp1   | 0,25  | 0,68194299  | 0,11  | 0,900474924 | -0,2  | 0,764615262 | -0,56 | 0,169294819 | -0,15 | 0,825680274 |
| Foxp2   | 0,04  | 0,973083012 | 0,67  | 0,277568816 | 0     | 0,999931921 | -0,43 | 0,185796276 | 0,71  | 0,226701712 |
| Foxp3   | 0,31  | 0,508899225 | -0,33 | 0,732044571 | 0,03  | 0,96861006  | 0,28  | 0,731281458 | 0,28  | 0,765419939 |
| Foxp4   | 0,13  | 0,834881357 | 0,08  | 0,946885634 | 0,59  | 0,212043073 | 2,09  | 0,016028907 | -0,37 | 0,544938455 |
| Foxq1   | 0,4   | 0,495249753 | -0,24 | 0,671319666 | 0,99  | 0,375756922 | -0,17 | 0,618254643 | 0,33  | 0,769321529 |
| Foxr1   | -0,23 | 0,783200207 | -0,11 | 0,89081665  | -0,31 | 0,811424918 | 0,34  | 0,525732925 | 0,19  | 0,811754577 |
| Foxr2   | -0,05 | 0,944945033 | 0,23  | 0,860142618 | -0,29 | 0,64759465  | -0,14 | 0,839333217 | 0,03  | 0,978981442 |
| Foxred1 | -0,24 | 0,690085958 | 0,02  | 0,989327073 | 0,93  | 0,221457946 | 0,22  | 0,666156083 | 0,51  | 0,465535486 |

|          |       |             |       |             |       |             |       |             |       |             |
|----------|-------|-------------|-------|-------------|-------|-------------|-------|-------------|-------|-------------|
| Foxred2  | 0,56  | 0,20299588  | 0,43  | 0,654719935 | 0,04  | 0,980801972 | -0,31 | 0,825017636 | 0,33  | 0,828679046 |
| Foxs1    | -0,09 | 0,886813669 | -0,33 | 0,512422775 | 0,39  | 0,498531839 | 0,18  | 0,805169421 | 0,06  | 0,949751787 |
| Fpgs     | -0,41 | 0,606922012 | -0,43 | 0,562406399 | 0,31  | 0,777918093 | -0,1  | 0,85301747  | -0,35 | 0,587199571 |
| Fpgt     | -0,25 | 0,911399028 | 0,2   | 0,783325809 | 0,3   | 0,823823322 | -0,09 | 0,942739047 | 0,28  | 0,830268209 |
| Fpr1     | 0,27  | 0,67806773  | -0,11 | 0,92244754  | 2,28  | 0,238218636 | 0,1   | 0,899246471 | -0,05 | 0,95587699  |
| Fpr2     | -0,11 | 0,934802231 | -0,29 | 0,784374085 | -0,89 | 0,666715303 | -0,05 | 0,943938445 | 0,05  | 0,962030524 |
| Fpr3     | 0,1   | 0,842159948 | -0,09 | 0,906631077 | 0,09  | 0,891782315 | 0,17  | 0,69938772  | 0     | 0,999733463 |
| Fpr-rs3  | 0     | 0,998027251 | 0,07  | 0,905517116 | -0,09 | 0,904057901 | -0,32 | 0,517565104 | -0,25 | 0,682150194 |
| Fpr-rs4  | -0,19 | 0,827441872 | -0,12 | 0,812432185 | -0,39 | 0,450605545 | 0,29  | 0,529965498 | 0,03  | 0,979456872 |
| Fpr-rs6  | -0,11 | 0,836336792 | 0,49  | 0,666285906 | -0,1  | 0,891011584 | -0,32 | 0,519380432 | -0,02 | 0,983469081 |
| Fra10ac1 | -0,42 | 0,536033087 | -0,16 | 0,901321339 | 0,27  | 0,808065828 | 0,21  | 0,752708491 | 0,32  | 0,788761628 |
| Fras1    | 0,34  | 0,391246185 | 0,27  | 0,582502577 | -0,6  | 0,174007047 | -0,36 | 0,517148433 | -0,29 | 0,686049613 |
| Frat1    | 0,64  | 0,263105607 | -0,02 | 0,980518468 | -0,52 | 0,500849254 | -0,71 | 0,182664592 | 0,01  | 0,990091016 |
| Frat2    | 0,23  | 0,68161851  | 0,23  | 0,745921616 | -0,49 | 0,606014837 | -0,49 | 0,190838433 | 0,15  | 0,836061657 |
| Frem1    | 0,05  | 0,960597621 | 0,17  | 0,733269724 | -0,22 | 0,834069966 | 0,01  | 0,984966598 | 0,27  | 0,773981116 |
| Frem2    | 0,07  | 0,936354359 | -0,06 | 0,966135508 | -0,11 | 0,904132011 | -0,61 | 0,390823877 | 0     | 0,998748098 |
| Frem3    | 0,26  | 0,748671472 | -0,2  | 0,918041124 | 0,05  | 0,94665439  | 0,47  | 0,599437231 | -0,24 | 0,820657685 |
| Frg1     | 0,06  | 0,922118639 | 0,15  | 0,724005117 | 0,25  | 0,743653977 | 0,24  | 0,478731976 | -0,34 | 0,551972106 |
| Frk      | -0,69 | 0,31845345  | -0,59 | 0,541469535 | 1,34  | 0,195381028 | -0,61 | 0,688152796 | -0,67 | 0,656756924 |
| Frmd3    | -0,02 | 0,97382475  | 0,1   | 0,912535732 | -0,13 | 0,845651772 | -0,38 | 0,65757228  | -0,17 | 0,927536545 |
| Frmd4a   | -0,27 | 0,677318928 | -0,24 | 0,765705056 | 1,03  | 0,151352948 | 0,85  | 0,061569622 | -0,25 | 0,674907074 |
| Frmd4b   | -0,21 | 0,697684746 | 0,23  | 0,817586426 | -0,04 | 0,963199274 | 0,25  | 0,62296101  | 0,37  | 0,486025914 |
| Frmd5    | -0,03 | 0,97454391  | 0,08  | 0,935329426 | -0,19 | 0,814575035 | -0,85 | 0,128119399 | 0,53  | 0,520141032 |
| Frmd6    | 0,62  | 0,255721664 | -0,06 | 0,962028658 | 0,32  | 0,459160863 | 1,16  | 0,267639393 | 0,22  | 0,874717264 |
| Frmd7    | -0,05 | 0,950532575 | -0,23 | 0,641804702 | -0,09 | 0,916403684 | 0,33  | 0,483699037 | 0,02  | 0,985982505 |
| Frmd8    | -0,19 | 0,810637877 | -0,38 | 0,638366221 | 0,07  | 0,917694073 | 0,89  | 0,065705396 | -0,22 | 0,716659497 |
| Frmd8os  | 0,35  | 0,52880661  | 0,05  | 0,926353869 | 0,01  | 0,996265665 | -0,16 | 0,75485675  | 0,04  | 0,962665265 |
| Frmpd1   | -0,24 | 0,741907626 | -0,01 | 0,994735911 | 0,15  | 0,9113279   | 0,15  | 0,73693059  | -0,17 | 0,763240477 |
| Frmpd1os | -0,41 | 0,446685156 | 0     | 1           | 0,11  | 0,877023506 | 0,12  | 0,798741105 | -0,24 | 0,76521225  |
| Frmpd3   | -0,01 | 0,993728727 | 0,02  | 0,974702154 | -0,35 | 0,521569092 | 0,1   | 0,874904932 | 0,11  | 0,890177897 |
| Frmpd4   | -0,01 | 0,994104887 | 0,45  | 0,292405808 | -0,26 | 0,715403033 | -0,06 | 0,922778648 | 0,18  | 0,796747526 |
| Frrs1    | -0,52 | 0,265150138 | -0,34 | 0,811472247 | 1,28  | 0,118728837 | -0,4  | 0,694368504 | 0,09  | 0,949178165 |
| Frrs1l   | 0,04  | 0,962399085 | -0,12 | 0,926157704 | -0,29 | 0,669784548 | 0,15  | 0,749218641 | -0,23 | 0,776165429 |
| Frs2     | 0,09  | 0,904633081 | -0,37 | 0,61193546  | 0,27  | 0,662322838 | 0,03  | 0,952550916 | -0,15 | 0,849295769 |
| Frs3     | 0,11  | 0,86920015  | -0,12 | 0,810635763 | 0,1   | 0,904057901 | -0,55 | 0,566165959 | -0,18 | 0,85508146  |

|         |       |             |       |             |       |             |       |             |       |             |
|---------|-------|-------------|-------|-------------|-------|-------------|-------|-------------|-------|-------------|
| Frs3os  | 0,04  | 0,948926586 | 0,16  | 0,781665479 | -0,43 | 0,387309747 | -0,07 | 0,90213506  | -0,06 | 0,953297732 |
| Fry     | -1,03 | 0,104092085 | -1,23 | 0,0802723   | 0,11  | 0,940068173 | 0,72  | 0,108464649 | -0,81 | 0,104257693 |
| Fryl    | 0,25  | 0,552940583 | 0,39  | 0,367968212 | -0,61 | 0,316219499 | -0,4  | 0,308123565 | 0,03  | 0,973428839 |
| Frzb    | -1    | 0,048513596 | -0,15 | 0,834508568 | 0,06  | 0,946201063 | 0,06  | 0,977595722 | 0,13  | 0,938281249 |
| Fsbp    | -0,11 | 0,854564641 | -0,05 | 0,961370411 | 0,28  | 0,806044178 | 0,1   | 0,858484804 | -0,16 | 0,843351909 |
| Fscb    | 0,01  | 0,983765302 | 0,28  | 0,84786877  | 0,02  | 0,991240121 | -0,03 | 0,967866794 | 0,15  | 0,858534673 |
| Fscn1   | -0,73 | 0,093483975 | -0,55 | 0,277253387 | 0,36  | 0,53898823  | 1,89  | 0,006007017 | -0,91 | 0,081368154 |
| Fscn2   | -0,24 | 0,818182081 | 0,05  | 0,945929004 | 0,07  | 0,935978536 | 0,03  | 0,966334592 | 0,19  | 0,790215612 |
| Fscn3   | -0,28 | 0,727137147 | 0,01  | 0,996203965 | -0,26 | 0,736669204 | -0,04 | 0,963752888 | -0,17 | 0,86127037  |
| Fsd1    | -0,06 | 0,93534828  | 0,23  | 0,649611595 | -0,27 | 0,770526999 | 0,57  | 0,124976338 | 0,59  | 0,266819789 |
| Fsd1l   | -1,13 | 0,191561065 | -0,68 | 0,628174614 | 1,08  | 0,158177551 | 0,05  | 0,938387989 | -0,24 | 0,872943048 |
| Fsd2    | 0,13  | 0,909885273 | 0,6   | 0,273317646 | -0,39 | 0,637321546 | -0,29 | 0,692706301 | 0,2   | 0,830086988 |
| Fshb    | 0,24  | 0,615064142 | 0,32  | 0,664787536 | -0,08 | 0,909233941 | 0,26  | 0,577432583 | 0,12  | 0,891375716 |
| Fshr    | 0,32  | 0,520545783 | -0,03 | 0,958545812 | -0,49 | 0,324602896 | -0,05 | 0,921600281 | -0,17 | 0,838679773 |
| Fsip1   | 0,38  | 0,622859793 | -0,35 | 0,459231649 | -0,22 | 0,736508407 | 0,08  | 0,873610553 | -0,36 | 0,501644357 |
| Fst     | 0,63  | 0,235336941 | 0,94  | 0,219055424 | -0,87 | 0,37686469  | -0,02 | 0,981610833 | 0,76  | 0,131482799 |
| Fstl1   | -0,73 | 0,132779189 | -0,25 | 0,658470074 | -0,06 | 0,938771378 | -0,15 | 0,695437056 | -0,22 | 0,735152891 |
| Fstl3   | 0,2   | 0,81656188  | 0,22  | 0,581798558 | 0     | 0,99954948  | -0,73 | 0,073223115 | -0,15 | 0,789358981 |
| Fstl4   | 0,08  | 0,931445059 | 0,36  | 0,602956592 | -0,23 | 0,703468807 | -0,35 | 0,510508734 | -0,12 | 0,89529118  |
| Fstl5   | 0,24  | 0,794949783 | 0,43  | 0,661080964 | -0,19 | 0,823823322 | -0,1  | 0,884352208 | 0,1   | 0,928724353 |
| Ftcd    | 0,07  | 0,901876593 | 0,39  | 0,406323049 | -0,03 | 0,970939073 | -0,08 | 0,908141892 | 0,31  | 0,637283168 |
| Fth1    | -0,29 | 0,434641897 | -0,17 | 0,667502888 | -0,11 | 0,912299263 | -0,22 | 0,497073347 | -0,23 | 0,677199361 |
| Fthl17a | -0,08 | 0,925084264 | -0,36 | 0,615311543 | -0,51 | 0,330719676 | 0,25  | 0,568428683 | -0,41 | 0,55416491  |
| Fthl17e | 0,61  | 0,355118268 | -0,12 | 0,934280572 | -0,16 | 0,850171327 | -0,09 | 0,899003207 | -0,37 | 0,502676586 |
| Fthl17f | -0,26 | 0,657328383 | -0,42 | 0,614530823 | -0,04 | 0,970969012 | 0,15  | 0,864633859 | 0,34  | 0,668008337 |
| Ftl1    | 0,39  | 0,295828956 | -0,01 | 0,994730653 | -0,02 | 0,978012085 | 0,22  | 0,499564387 | 0,14  | 0,823098095 |
| Ftmt    | 0,15  | 0,842562602 | -0,11 | 0,829626088 | -0,33 | 0,628978443 | 0,09  | 0,87616247  | 0,16  | 0,833124162 |
| Fto     | -0,13 | 0,876019664 | -0,31 | 0,70212029  | 0,33  | 0,57717258  | -0,16 | 0,667849424 | -0,77 | 0,27266222  |
| Ftsj1   | -0,01 | 0,990894139 | -0,2  | 0,763005394 | 0,08  | 0,965775869 | 0,06  | 0,920317721 | 0,13  | 0,876747929 |
| Ftsj2   | -0,41 | 0,239601221 | -0,07 | 0,927073711 | -0,04 | 0,961800548 | 0,18  | 0,698362346 | -0,19 | 0,843351909 |
| Ftsj3   | -0,64 | 0,257494498 | -0,04 | 0,975427696 | 1,02  | 0,25427949  | 0,45  | 0,422600163 | 0,14  | 0,918077524 |
| Ftx     | -0,23 | 0,730710327 | 0,05  | 0,939830406 | 0,46  | 0,506222058 | -1,41 | 0,118595192 | -0,04 | 0,981079016 |
| Fubp1   | -0,17 | 0,765643907 | 0,15  | 0,74717977  | -0,11 | 0,921207094 | 0,38  | 0,258540102 | 0,38  | 0,480571725 |
| Fubp3   | -0,35 | 0,493929    | -0,56 | 0,302028989 | 0,77  | 0,538096264 | 0,19  | 0,62296101  | -0,15 | 0,86229485  |
| Fuca1   | 0,01  | 0,984747015 | -0,09 | 0,915565977 | 0,12  | 0,878636183 | 0,09  | 0,809498568 | -0,18 | 0,745134899 |



|          |       |             |       |             |       |             |       |             |       |             |
|----------|-------|-------------|-------|-------------|-------|-------------|-------|-------------|-------|-------------|
| Fuca2    | 0,5   | 0,509815996 | 0,22  | 0,781665479 | 0,78  | 0,34127804  | 0,67  | 0,380448921 | -0,74 | 0,330314966 |
| Fuk      | -0,11 | 0,904541231 | -0,39 | 0,760600519 | 0,31  | 0,813180174 | 0,19  | 0,832587841 | 0,04  | 0,978604922 |
| Fundc1   | 0,15  | 0,892062603 | -0,12 | 0,95429671  | 0,63  | 0,542385406 | -0,38 | 0,533837265 | -0,34 | 0,819072786 |
| Fundc2   | -0,28 | 0,617280733 | 0,19  | 0,781046971 | -0,28 | 0,702928613 | 0,14  | 0,825017636 | 0,26  | 0,633381473 |
| Fuom     | -0,15 | 0,778869381 | -0,44 | 0,493482658 | 0,11  | 0,922971065 | -0,09 | 0,824364287 | -0,24 | 0,673120647 |
| Furin    | 0,06  | 0,905834527 | 0,2   | 0,801259805 | 0,14  | 0,814956693 | 0,25  | 0,613598847 | 0,16  | 0,81665045  |
| Fus      | -0,53 | 0,364107408 | -0,33 | 0,696160257 | 0,41  | 0,599364835 | 0,61  | 0,327876546 | 0,46  | 0,496318298 |
| Fut1     | -0,02 | 0,970938013 | 0,37  | 0,468035796 | 0,31  | 0,541816551 | -0,45 | 0,414798094 | -0,05 | 0,948163009 |
| Fut10    | 0,03  | 0,983516046 | 0,27  | 0,64119235  | 0,3   | 0,68845998  | -0,54 | 0,241341112 | -0,07 | 0,952718905 |
| Fut11    | -0,1  | 0,882500171 | 0     | 1           | 0,57  | 0,340237423 | 0,15  | 0,914828446 | -0,68 | 0,360726287 |
| Fut2     | -0,15 | 0,810208393 | 0     | 1           | -0,07 | 0,923248239 | -0,2  | 0,820745707 | -0,18 | 0,883791272 |
| Fut4     | -0,74 | 0,60939008  | 0,78  | 0,500152819 | 0,02  | 0,993379272 | 0,14  | 0,828125777 | 0,43  | 0,631479776 |
| Fut4-ps1 | 0,04  | 0,957820843 | 0,03  | 0,96446565  | -0,19 | 0,702928613 | -0,08 | 0,85293288  | -0,05 | 0,940878193 |
| Fut7     | -0,3  | 0,577119949 | 0,02  | 0,994161588 | -0,17 | 0,853987483 | -0,21 | 0,737646112 | -0,01 | 0,993785683 |
| Fut8     | -0,26 | 0,817937614 | -0,44 | 0,745130453 | 1,37  | 0,069329557 | -0,05 | 0,963678375 | 0,06  | 0,957130917 |
| Fut9     | 0,17  | 0,833900133 | 0,28  | 0,89081665  | -0,73 | 0,082483172 | -0,02 | 0,980890499 | 0,42  | 0,549951038 |
| Fuz      | -0,15 | 0,906885053 | -0,33 | 0,729423334 | -0,08 | 0,960650487 | -0,44 | 0,688163185 | -0,5  | 0,625751363 |
| Fv1      | -0,35 | 0,762798673 | 0,07  | 0,926157704 | 0,16  | 0,909233941 | -0,46 | 0,225317501 | 0,56  | 0,483068417 |
| Fxn      | 0     | 0,997893551 | -0,25 | 0,803071242 | 1,41  | 0,293036801 | 0,58  | 0,400176197 | 0,56  | 0,498553997 |
| Fxr1     | -0,03 | 0,975949545 | 0,3   | 0,608844326 | 0,2   | 0,894339966 | 0,44  | 0,378001138 | 0,62  | 0,244965154 |
| Fxr2     | -0,34 | 0,596273756 | 0,26  | 0,514781187 | 0,7   | 0,179552168 | -0,24 | 0,445793157 | -0,46 | 0,375748669 |
| Fxyd1    | 0,14  | 0,84900712  | 0,52  | 0,61590901  | -0,08 | 0,946364405 | -1,83 | 0,084374314 | -0,63 | 0,583952152 |
| Fxyd2    | 0,14  | 0,865776054 | -0,07 | 0,923044405 | -0,02 | 0,986322196 | -2,66 | 0,024168746 | -0,56 | 0,587305934 |
| Fxyd3    | -0,14 | 0,847127381 | 0,06  | 0,936792848 | 0,75  | 0,219362501 | 0,24  | 0,521355444 | 0,22  | 0,737575231 |
| Fxyd4    | 0,54  | 0,641357042 | -0,44 | 0,518494408 | -0,57 | 0,620445455 | 0,01  | 0,992365775 | -0,47 | 0,419557334 |
| Fxyd5    | 0,13  | 0,7830424   | -0,17 | 0,781665479 | -0,28 | 0,584320897 | 0,57  | 0,131658507 | 0,19  | 0,74324214  |
| Fxyd6    | -0,86 | 0,296031134 | -1,1  | 0,385774398 | -0,13 | 0,949135765 | -2,31 | 0,02248719  | -1,04 | 0,032750472 |
| Fxyd7    | 0,11  | 0,89081819  | -0,42 | 0,494161701 | -0,05 | 0,950166322 | 0,07  | 0,917424194 | 0,03  | 0,977247356 |
| Fyb      | -0,12 | 0,874467978 | -0,1  | 0,912535732 | 0,28  | 0,72902724  | -0,47 | 0,50808678  | 0,54  | 0,774028498 |
| Fyco1    | -0,26 | 0,741490814 | -0,46 | 0,453958512 | -0,44 | 0,621814518 | -0,36 | 0,308923754 | -0,47 | 0,481524365 |
| Fyn      | 0,03  | 0,954349573 | 0,36  | 0,459417799 | -0,16 | 0,875486206 | 0,27  | 0,462677689 | -0,16 | 0,832848337 |
| Fytd1    | 0,13  | 0,9154154   | 0,06  | 0,943713379 | 0,3   | 0,660920525 | 0,49  | 0,474411046 | 0,22  | 0,830086988 |
| Fzd1     | 0,76  | 0,317524117 | 0,25  | 0,638366221 | -0,54 | 0,259550802 | 0,09  | 0,839567244 | -0,01 | 0,991628025 |
| Fzd10    | 0,11  | 0,877675489 | -0,04 | 0,95429671  | 0,12  | 0,891175722 | -0,33 | 0,744582932 | -0,25 | 0,856295805 |
| Fzd2     | 0,11  | 0,882500171 | 0,24  | 0,808222835 | 0,34  | 0,647804826 | -0,2  | 0,671991774 | 0,11  | 0,938160837 |

|               |       |             |       |             |       |             |       |             |       |             |
|---------------|-------|-------------|-------|-------------|-------|-------------|-------|-------------|-------|-------------|
| Fzd3          | 0,07  | 0,949236157 | -0,01 | 0,993221425 | -0,25 | 0,71705844  | -0,55 | 0,578896547 | -0,36 | 0,765342998 |
| Fzd4          | -0,32 | 0,401159049 | -0,35 | 0,335213512 | 0,02  | 0,984778342 | -0,5  | 0,146588059 | -0,64 | 0,132625512 |
| Fzd5          | 0,12  | 0,785400637 | 0,14  | 0,767178812 | 0,01  | 0,996414422 | 0,15  | 0,782250507 | 0,89  | 0,088382056 |
| Fzd6          | -0,55 | 0,302006612 | -0,46 | 0,702588121 | 0,56  | 0,342804036 | -0,33 | 0,584770669 | -0,32 | 0,677347957 |
| Fzd7          | 0,34  | 0,565453765 | 0,24  | 0,698886888 | 0,05  | 0,953589617 | -0,11 | 0,799256118 | 0,27  | 0,654075099 |
| Fzd8          | -0,09 | 0,909325137 | 0,05  | 0,936333402 | 0,1   | 0,90569262  | -0,61 | 0,172485486 | -0,11 | 0,892912029 |
| Fzd9          | -0,05 | 0,931413805 | 0,29  | 0,678357594 | -0,48 | 0,428556311 | -0,43 | 0,498825358 | 0,16  | 0,885389289 |
| Fzr1          | 0,06  | 0,927051853 | -0,35 | 0,434114626 | 0,41  | 0,544423132 | 0,47  | 0,268448842 | -0,33 | 0,650995474 |
| G0s2          | 0,26  | 0,64776317  | 0,18  | 0,789051952 | -0,27 | 0,909371204 | -0,66 | 0,219624257 | -0,25 | 0,763240477 |
| G2e3          | -0,01 | 0,994389926 | 0,14  | 0,772558681 | 0,69  | 0,196670902 | 1,99  | 0,04078943  | -0,12 | 0,944842342 |
| G370120E05Rik | -0,33 | 0,576400203 | -0,22 | 0,659894126 | -0,17 | 0,840308671 | -0,25 | 0,480111634 | 0,17  | 0,8736151   |
| G3bp1         | -0,33 | 0,465553333 | -0,33 | 0,425519039 | 0,41  | 0,550001843 | 0,49  | 0,177667885 | 0,01  | 0,990091016 |
| G3bp2         | 0,01  | 0,983516046 | 0,42  | 0,574343122 | 0,05  | 0,968677508 | 0,53  | 0,292644409 | 1,15  | 0,018242947 |
| G430095P16Rik | -0,18 | 0,718901325 | 0,1   | 0,869734155 | 0,02  | 0,979084407 | -0,21 | 0,552061337 | -0,14 | 0,854494093 |
| G530011O06Rik | 0,17  | 0,867953985 | 1,45  | 0,087435995 | -0,54 | 0,74860644  | 0,81  | 0,219776615 | 1,55  | 0,035693318 |
| G630016G05Rik | -0,42 | 0,364497258 | 0,16  | 0,855632384 | 0,11  | 0,849342965 | -0,89 | 0,318200395 | 0,36  | 0,797699757 |
| G630018N14Rik | -0,11 | 0,863719569 | -0,11 | 0,843586711 | -0,1  | 0,877598693 | -0,03 | 0,969216304 | 0,07  | 0,923846654 |
| G630025P09Rik | -0,15 | 0,724829885 | -0,27 | 0,70995316  | 0     | 0,999329448 | 0,36  | 0,371802519 | 0,34  | 0,537706015 |
| G630030J09Rik | 0,62  | 0,317205194 | 0,02  | 0,993221425 | -0,16 | 0,89101802  | -0,05 | 0,900742855 | 0,09  | 0,909555782 |
| G630055G22Rik | -0,1  | 0,880074728 | 0,22  | 0,747707816 | -0,06 | 0,930193129 | -0,13 | 0,768880868 | -0,1  | 0,902608866 |
| G630071F17Rik | 0,22  | 0,671277626 | 0,07  | 0,895216432 | -0,13 | 0,867589536 | -0,04 | 0,9485706   | -0,09 | 0,912683275 |
| G630093K05Rik | 0,62  | 0,518400371 | -0,29 | 0,641804702 | 0,06  | 0,949334141 | -0,04 | 0,932315462 | -0,07 | 0,931191187 |
| G6b           | -0,21 | 0,678857468 | 0,62  | 0,166830486 | 0,23  | 0,775367269 | 0,07  | 0,94307532  | 0,11  | 0,938032104 |
| G6bos         | -0,2  | 0,702313432 | 0,15  | 0,859422624 | -0,11 | 0,891482131 | -0,28 | 0,596712266 | -0,3  | 0,673500041 |
| G6pc          | 0,05  | 0,963738499 | 0     | 1           | -0,07 | 0,940131381 | -0,15 | 0,90038088  | -0,29 | 0,861056054 |
| G6pc2         | -0,04 | 0,946411755 | -0,05 | 0,974580396 | -0,03 | 0,979791644 | -0,47 | 0,673976823 | -0,24 | 0,899196564 |
| G6pc3         | -0,13 | 0,769059732 | -0,31 | 0,705845461 | 0,62  | 0,490364869 | 0,22  | 0,749715866 | -0,3  | 0,71188027  |
| G6pd2         | -0,29 | 0,586458491 | 0,04  | 0,941628939 | -0,16 | 0,805783058 | 0,04  | 0,926704232 | -0,07 | 0,94758725  |
| G730013B05Rik | -0,25 | 0,738448626 | 0,84  | 0,486262147 | -0,1  | 0,891950071 | 0,37  | 0,580961692 | -0,14 | 0,936447878 |
| G930045G22Rik | 0,19  | 0,828240142 | 0,25  | 0,763005394 | -0,06 | 0,943159909 | 0,25  | 0,500323127 | 0,33  | 0,608004947 |
| Gaa           | -0,06 | 0,949362206 | -0,12 | 0,940046211 | 0,45  | 0,542385406 | -0,89 | 0,098108765 | -0,77 | 0,338653241 |
| Gab1          | -0,36 | 0,750634506 | -0,66 | 0,389273523 | 0,79  | 0,10424513  | 0,58  | 0,263839824 | -0,48 | 0,586118577 |
| Gab2          | 0,22  | 0,593540946 | 0,2   | 0,669676201 | -0,59 | 0,450947936 | 0,73  | 0,171282602 | -0,23 | 0,855281866 |
| Gab3          | -1,88 | 0,139999287 | -0,82 | 0,459417799 | -0,06 | 0,973732268 | -1,43 | 0,083480627 | -0,32 | 0,8024387   |
| Gabarap       | 0,46  | 0,213935959 | 0,1   | 0,808422093 | 0,25  | 0,653622586 | -0,21 | 0,558039845 | 0,13  | 0,831190498 |

|            |       |             |       |             |       |             |       |             |       |             |
|------------|-------|-------------|-------|-------------|-------|-------------|-------|-------------|-------|-------------|
| Gabarapl1  | 0,3   | 0,480468471 | 0,43  | 0,389273523 | -0,43 | 0,398389729 | -0,18 | 0,650855041 | 0,07  | 0,932846086 |
| Gabarapl2  | 0,03  | 0,964124037 | -0,03 | 0,971372541 | -0,32 | 0,489348808 | 0,03  | 0,960860696 | 0,09  | 0,906660977 |
| Gabbr1     | 0,65  | 0,111767257 | 0,54  | 0,472282782 | -0,45 | 0,541560473 | -0,32 | 0,6979045   | 0,39  | 0,591960494 |
| Gabbr2     | 0,06  | 0,944722622 | -0,08 | 0,887889466 | -0,04 | 0,969476711 | 0,15  | 0,769374738 | 0,09  | 0,935812103 |
| Gabpa      | -0,22 | 0,853351904 | -0,09 | 0,912773944 | 0,05  | 0,964509282 | 0,42  | 0,729786741 | 0,54  | 0,710145894 |
| Gabpb1     | -0,12 | 0,830575431 | 0,37  | 0,39909134  | 0,38  | 0,738557284 | 1,1   | 0,216148738 | 0,33  | 0,782889048 |
| Gabpb2     | -0,72 | 0,135369075 | -0,27 | 0,785244931 | -0,08 | 0,955984004 | -0,21 | 0,764111059 | -0,04 | 0,974110019 |
| Gabra1     | -0,17 | 0,728643996 | -0,1  | 0,935329426 | -0,25 | 0,695438326 | 0,15  | 0,804567514 | -0,32 | 0,539129336 |
| Gabra2     | -0,27 | 0,589783488 | -0,3  | 0,649067803 | -0,28 | 0,659694447 | 0,27  | 0,620341254 | -0,01 | 0,991980521 |
| Gabra3     | -0,1  | 0,922118639 | 0,15  | 0,873986979 | -0,2  | 0,807727786 | -0,87 | 0,47532893  | -0,84 | 0,4940585   |
| Gabra4     | -0,27 | 0,693692418 | -0,21 | 0,864989815 | -0,06 | 0,947460329 | -0,2  | 0,831764227 | -0,36 | 0,792404969 |
| Gabra5     | 0,43  | 0,64776317  | 0,07  | 0,932292974 | -0,19 | 0,846176253 | -0,24 | 0,564926961 | -0,18 | 0,782386442 |
| Gabra6     | -0,17 | 0,761919089 | -0,2  | 0,746998924 | 0,08  | 0,935168506 | -0,32 | 0,327997755 | -0,53 | 0,302524811 |
| Gabrb1     | -0,17 | 0,814444163 | -0,22 | 0,703291096 | -0,19 | 0,729458414 | -0,13 | 0,804912063 | -0,07 | 0,943938567 |
| Gabrb2     | 0,39  | 0,421029929 | -0,06 | 0,9537937   | -0,37 | 0,64759465  | -0,13 | 0,843949302 | -0,27 | 0,726563756 |
| Gabrb3     | 0,14  | 0,883130741 | 0,15  | 0,896187678 | 0,14  | 0,890405742 | 0,24  | 0,567266717 | -0,15 | 0,861174316 |
| Gabrd      | 0,36  | 0,552331623 | -0,29 | 0,75247655  | 0,32  | 0,746290585 | 0,61  | 0,316429217 | 0,29  | 0,733979012 |
| Gabre      | 0,71  | 0,149941264 | 0,36  | 0,716725804 | 0,2   | 0,881793393 | -0,56 | 0,603471344 | 0,07  | 0,973428839 |
| Gabrg1     | 0,13  | 0,833275012 | -0,33 | 0,401401978 | -0,23 | 0,750624323 | 0,33  | 0,561612258 | 0,08  | 0,925858284 |
| Gabrg2     | -0,01 | 0,989030713 | -0,42 | 0,725431195 | -0,11 | 0,911506558 | 0,66  | 0,339374083 | -0,04 | 0,978604922 |
| Gabrg3     | 0,7   | 0,285063072 | 0,16  | 0,853569707 | 0,22  | 0,707539555 | 0,11  | 0,802314336 | 0,28  | 0,592460098 |
| Gabrp      | 0,28  | 0,793637667 | 0,06  | 0,970437908 | 0,02  | 0,993379272 | 0,22  | 0,759513882 | -0,2  | 0,825564898 |
| Gabrq      | 0,35  | 0,513673727 | -0,02 | 0,985413376 | -0,1  | 0,91344763  | 0,3   | 0,379160985 | 0,04  | 0,961281513 |
| Gabbr1     | 0,2   | 0,848783415 | -0,27 | 0,829626088 | -0,9  | 0,221124073 | 0,09  | 0,916455982 | -0,06 | 0,958259949 |
| Gabbr2     | 0,04  | 0,975949545 | 0,03  | 0,965039248 | -0,69 | 0,463843173 | -0,24 | 0,776216317 | -0,05 | 0,976393169 |
| Gabbr3     | -0,13 | 0,847055538 | 0,55  | 0,548847572 | -0,05 | 0,957904357 | -0,46 | 0,293872515 | 0,2   | 0,72659479  |
| Gad1       | -0,72 | 0,214139353 | 0,04  | 0,987162042 | -0,58 | 0,5876076   | -2,17 | 0,032525839 | -1,1  | 0,207567334 |
| Gad1os     | -0,12 | 0,879514284 | -0,01 | 0,999210601 | -0,29 | 0,566405441 | -0,14 | 0,748929665 | 0,04  | 0,956610289 |
| Gad1-ps    | 0,14  | 0,834588137 | 0,07  | 0,896187678 | -0,2  | 0,759598044 | 0,4   | 0,376631277 | -0,01 | 0,991628025 |
| Gad2       | -0,29 | 0,652607099 | 0,31  | 0,855632384 | -0,18 | 0,7876451   | -1,12 | 0,296402911 | -0,82 | 0,460094193 |
| Gadd45a    | 0,16  | 0,755116147 | 0,05  | 0,946885634 | 0,04  | 0,965007082 | 0,46  | 0,342428745 | 0,31  | 0,608004947 |
| Gadd45b    | 0,45  | 0,461113298 | 0,67  | 0,360218206 | -0,41 | 0,471873683 | -1,2  | 0,061944109 | 0,19  | 0,754898455 |
| Gadd45g    | 0,05  | 0,955200574 | 0,8   | 0,275147283 | -0,38 | 0,564995575 | -1,64 | 0,023776029 | 0,59  | 0,23680437  |
| Gadd45gip1 | -0,06 | 0,936611783 | -0,15 | 0,854940418 | -0,22 | 0,751201307 | -0,06 | 0,9127881   | -0,19 | 0,832848337 |
| Gadl1      | -0,07 | 0,935607349 | 0,07  | 0,972706967 | -0,63 | 0,476781249 | -0,02 | 0,991962381 | 0,45  | 0,726042963 |

|          |       |             |       |             |       |             |       |             |       |             |
|----------|-------|-------------|-------|-------------|-------|-------------|-------|-------------|-------|-------------|
| Gak      | -0,01 | 0,983663467 | -0,2  | 0,683509429 | -0,17 | 0,772008734 | 0,19  | 0,668938077 | 0,14  | 0,833039417 |
| Gal      | -0,61 | 0,278121865 | -0,87 | 0,152199284 | 2,79  | 0,000264008 | 3,94  | 0,005487532 | 0     | 0,998664337 |
| Gal3st1  | 0     | 0,999549745 | 0,24  | 0,713162995 | 0,02  | 0,978554254 | 0,06  | 0,906804259 | -0,38 | 0,443881784 |
| Gal3st2  | -0,31 | 0,485217611 | 0,21  | 0,776510774 | 0,07  | 0,953951069 | 0,08  | 0,881334406 | -0,07 | 0,928724353 |
| Gal3st3  | -0,25 | 0,66961506  | 0,25  | 0,667502888 | 0,13  | 0,843308751 | -0,35 | 0,444455078 | -0,12 | 0,869113953 |
| Gal3st4  | -0,34 | 0,697496197 | 0,32  | 0,78280538  | 0,01  | 0,992510518 | 0,12  | 0,774826947 | 0,58  | 0,339379182 |
| Galc     | -1,25 | 0,15490509  | -0,58 | 0,323278688 | 0,52  | 0,230173776 | 0,81  | 0,206141877 | 0,52  | 0,504660722 |
| Gale     | -0,36 | 0,428049245 | -0,64 | 0,161833308 | 0,52  | 0,334270696 | 1,39  | 0,085668841 | 0,25  | 0,826012305 |
| Galk1    | -0,2  | 0,66317593  | -0,06 | 0,953355735 | 0,02  | 0,988730227 | 0,34  | 0,609023716 | -0,21 | 0,832736649 |
| Galk2    | -0,03 | 0,970938013 | -0,15 | 0,791463084 | 0,26  | 0,705492321 | 0,49  | 0,411954534 | 0,05  | 0,971975122 |
| Galm     | -0,43 | 0,66609472  | -0,63 | 0,459453311 | 0,74  | 0,260200895 | 0,08  | 0,921731995 | -0,28 | 0,84970727  |
| Galns    | -0,4  | 0,469692532 | -0,4  | 0,532316439 | 0,19  | 0,831214914 | 1,79  | 0,044757829 | 0,2   | 0,859663155 |
| Galnt1   | -0,31 | 0,433787949 | -0,05 | 0,944460866 | 0,72  | 0,145335521 | 1,19  | 0,083401972 | -0,27 | 0,828278125 |
| Galnt10  | -0,99 | 0,058779917 | -1,12 | 0,434785723 | 0,54  | 0,432912125 | -0,94 | 0,288372966 | -1,23 | 0,115450224 |
| Galnt11  | 0,14  | 0,909632235 | -0,1  | 0,827496723 | 0,45  | 0,623447121 | -0,17 | 0,845617958 | -0,03 | 0,984125319 |
| Galnt12  | -1,1  | 0,387558354 | -1,65 | 0,087315688 | 2,21  | 0,038411212 | 3,71  | 0,005494861 | 0,34  | 0,708533352 |
| Galnt13  | 0,01  | 0,984752479 | 0,39  | 0,650606419 | 0,12  | 0,86459621  | -0,21 | 0,595865345 | -0,28 | 0,608072805 |
| Galnt14  | -0,23 | 0,586458491 | 0,17  | 0,897732014 | -0,22 | 0,755633965 | -0,16 | 0,762421848 | -0,07 | 0,962067581 |
| Galnt15  | -0,26 | 0,705404186 | -0,08 | 0,926996652 | -0,98 | 0,13589176  | -1,18 | 0,109316844 | -0,54 | 0,536721752 |
| Galnt16  | -0,03 | 0,983663467 | -0,39 | 0,774066123 | -0,23 | 0,683305382 | 0,24  | 0,718299331 | 0,1   | 0,910249438 |
| Galnt18  | -0,89 | 0,083421478 | -0,65 | 0,329583003 | 0,31  | 0,689847701 | 0,17  | 0,658857382 | -1,11 | 0,048627677 |
| Galnt2   | -0,56 | 0,385920627 | -0,19 | 0,663565725 | -0,15 | 0,82104737  | -0,05 | 0,909976349 | -0,45 | 0,431894609 |
| Galnt3   | -0,05 | 0,960800881 | 0,05  | 0,945143056 | 1,18  | 0,185454089 | -0,8  | 0,467369651 | -0,27 | 0,864292286 |
| Galnt4   | -0,26 | 0,515830448 | -0,11 | 0,817110093 | 0,55  | 0,343594254 | -0,3  | 0,70171096  | -0,34 | 0,672468584 |
| Galnt5   | 0,39  | 0,701297763 | 0,13  | 0,842663656 | -0,21 | 0,772774193 | -0,24 | 0,686382852 | -0,07 | 0,951471487 |
| Galnt6   | 0,23  | 0,55640978  | -0,06 | 0,923044405 | -0,16 | 0,811187914 | -0,31 | 0,334704308 | -0,17 | 0,778000995 |
| Galnt6os | 0,01  | 0,992045436 | 0,22  | 0,829391238 | -0,69 | 0,157143502 | 0,25  | 0,546441525 | 0,12  | 0,913274952 |
| Galnt7   | -0,19 | 0,758094656 | -0,08 | 0,898238238 | 0,59  | 0,469053827 | -0,18 | 0,787615739 | -0,16 | 0,872665918 |
| Galnt9   | 0,19  | 0,66961506  | 0,42  | 0,317962714 | -0,05 | 0,954986254 | -0,08 | 0,835214439 | 0,1   | 0,919867638 |
| Galntl5  | -0,21 | 0,663447662 | 0,33  | 0,785128233 | -0,11 | 0,904132011 | 0,24  | 0,712590852 | -0,15 | 0,885872093 |
| Galntl6  | 0,2   | 0,859481811 | 0,27  | 0,769551285 | -0,09 | 0,94110925  | -0,24 | 0,640458069 | 0,07  | 0,934185668 |
| Galp     | 0,3   | 0,54401985  | -0,09 | 0,919420498 | -0,29 | 0,661089127 | -0,2  | 0,75629951  | -0,11 | 0,882032329 |
| Galr1    | 0     | 0,996998625 | -0,04 | 0,942739255 | 0,1   | 0,895819764 | 0,2   | 0,635378562 | -0,21 | 0,760587652 |
| Galr2    | 0,05  | 0,939317944 | -0,01 | 0,98954147  | -0,13 | 0,867571963 | 0,3   | 0,501068696 | 0,22  | 0,745574572 |
| Galr3    | 0,26  | 0,577809864 | 0,07  | 0,945143056 | 0,18  | 0,776271532 | 0,3   | 0,673428333 | 0,32  | 0,765256761 |

|         |       |             |       |             |       |             |       |             |       |             |
|---------|-------|-------------|-------|-------------|-------|-------------|-------|-------------|-------|-------------|
| Galt    | -0,7  | 0,281648139 | -0,13 | 0,85597055  | 0,05  | 0,979374279 | 0,83  | 0,330898178 | 0,14  | 0,926844526 |
| Gamt    | -0,34 | 0,535386089 | -0,54 | 0,494161701 | 0,79  | 0,246288276 | 0     | 1           | -1,98 | 0,029008077 |
| Gan     | -0,09 | 0,892141122 | 0,37  | 0,828219939 | 0,45  | 0,586027392 | -0,41 | 0,49649316  | -0,11 | 0,883592868 |
| Ganab   | -0,6  | 0,226312589 | -0,24 | 0,680570135 | 0,82  | 0,188714611 | 0,44  | 0,486374283 | -0,38 | 0,676132909 |
| Ganc    | -0,4  | 0,586458491 | 0,38  | 0,508145248 | -0,55 | 0,51912977  | -1,25 | 0,043277241 | -0,28 | 0,668747774 |
| Gap43   | -0,69 | 0,534017117 | -0,06 | 0,954948291 | 1,21  | 0,25808359  | -0,59 | 0,270345878 | -0,58 | 0,274394155 |
| Gapdh   | -0,03 | 0,964358894 | 0,01  | 0,989873399 | -0,14 | 0,909963525 | 1,19  | 0,026291732 | 0,1   | 0,890417696 |
| Gapdhs  | -0,36 | 0,351518071 | -0,17 | 0,842663656 | -0,34 | 0,705142614 | 0     | 1           | -0,54 | 0,286600165 |
| Gapt    | 0,08  | 0,948926586 | 0,07  | 0,943713379 | -0,34 | 0,483761569 | 0,37  | 0,619654723 | -0,04 | 0,978604922 |
| Gapvd1  | -0,03 | 0,969486005 | -0,16 | 0,728434379 | -0,04 | 0,961464515 | -0,09 | 0,807661309 | 0,08  | 0,938825649 |
| Gar1    | -0,66 | 0,136095053 | -0,45 | 0,427023714 | 0,53  | 0,546286708 | 1,23  | 0,125351463 | 0,72  | 0,459584226 |
| Garem   | 0,06  | 0,9231839   | -0,56 | 0,216793251 | 0,33  | 0,723987482 | -0,86 | 0,035685356 | -0,65 | 0,313571933 |
| Gareml  | -0,04 | 0,950127033 | -0,17 | 0,910688765 | 0,43  | 0,554535106 | 0,62  | 0,362337687 | 0,01  | 0,991980521 |
| Garnl3  | 0,52  | 0,253489094 | 0,42  | 0,520216476 | 0,3   | 0,674253263 | -0,13 | 0,743093921 | -0,17 | 0,811975973 |
| Gars    | -0,28 | 0,552995103 | -0,43 | 0,428093777 | 0,49  | 0,507095234 | 1     | 0,066025106 | 0,37  | 0,586118577 |
| Gart    | -0,65 | 0,417482906 | -0,3  | 0,559315429 | 1,34  | 0,225514917 | 1,15  | 0,160438233 | 0,19  | 0,87645265  |
| Gas1    | -0,18 | 0,696631732 | -0,05 | 0,932292974 | -0,17 | 0,81820534  | -0,05 | 0,937079845 | -0,07 | 0,927296036 |
| Gas2    | -0,36 | 0,59710379  | -0,12 | 0,906463692 | -0,29 | 0,763815372 | -0,11 | 0,841354324 | 0,49  | 0,361399341 |
| Gas2l1  | -0,41 | 0,604956585 | -0,03 | 0,977204386 | 0,29  | 0,595395621 | -0,3  | 0,529679295 | -0,34 | 0,603288759 |
| Gas2l2  | -0,1  | 0,892823025 | -0,2  | 0,786394409 | -0,58 | 0,215124832 | 0     | 1           | -0,22 | 0,791840213 |
| Gas2l3  | -1,33 | 0,131976285 | -0,07 | 0,954866231 | 0,82  | 0,342313446 | 1,37  | 0,117024255 | -0,16 | 0,907903208 |
| Gas5    | 0,18  | 0,705404186 | 0,42  | 0,414656674 | -0,47 | 0,326707568 | -0,14 | 0,84745429  | 0,61  | 0,353136904 |
| Gas6    | -0,82 | 0,110252498 | -0,64 | 0,574767565 | 0,41  | 0,716743339 | -4,78 | 0,003009221 | -1,06 | 0,065968102 |
| Gas7    | -0,6  | 0,27425637  | -0,6  | 0,264702741 | 0,02  | 0,991568687 | 0,22  | 0,69938772  | -0,1  | 0,915395762 |
| Gas8    | -0,09 | 0,884230844 | -0,15 | 0,901210697 | 0,4   | 0,633535699 | 0,97  | 0,122551381 | 0,06  | 0,962094947 |
| Gast    | 0,21  | 0,717407143 | 0,03  | 0,974580396 | -0,02 | 0,979822436 | -0,21 | 0,797123056 | -0,03 | 0,982175252 |
| Gata1   | -0,26 | 0,760994851 | -0,53 | 0,444058759 | -0,16 | 0,894109709 | 0,78  | 0,207337982 | 0,38  | 0,626176831 |
| Gata2   | -0,12 | 0,827297612 | 0,21  | 0,797291146 | -0,3  | 0,552970779 | -1,19 | 0,025068521 | -0,04 | 0,956702425 |
| Gata3   | 0,03  | 0,959466597 | 0,36  | 0,51825831  | -0,24 | 0,744387748 | -0,66 | 0,309985864 | -0,19 | 0,779699075 |
| Gata4   | -0,2  | 0,777335496 | -0,41 | 0,459453311 | 0,1   | 0,93077684  | 0,09  | 0,939446012 | -0,29 | 0,783490449 |
| Gata5   | 0,18  | 0,791084597 | -0,18 | 0,763796207 | -0,16 | 0,813180174 | -1,38 | 0,156363909 | -0,4  | 0,74506541  |
| Gata5os | 0,24  | 0,707476585 | 0,03  | 0,984812702 | -0,04 | 0,962216849 | 0,17  | 0,640737261 | -0,04 | 0,969994712 |
| Gata6   | -0,44 | 0,69184055  | -0,9  | 0,200336704 | 0,12  | 0,944441051 | -1,82 | 0,067522477 | -0,1  | 0,944318268 |
| Gatad1  | -0,12 | 0,79119595  | -0,08 | 0,892238841 | 0,63  | 0,373558126 | -0,07 | 0,953637329 | -0,22 | 0,870379634 |
| Gatad2a | 0,09  | 0,841200817 | 0,06  | 0,956849804 | 0,13  | 0,872900604 | 0,1   | 0,854971757 | 0,08  | 0,913553402 |

|         |       |             |       |             |       |             |       |             |       |             |
|---------|-------|-------------|-------|-------------|-------|-------------|-------|-------------|-------|-------------|
| Gatad2b | -0,01 | 0,993728727 | -0,22 | 0,581631726 | 0,3   | 0,598179126 | -0,19 | 0,563573506 | -0,19 | 0,763240477 |
| Gatb    | -0,43 | 0,435235349 | -0,51 | 0,574121139 | 0,23  | 0,747906037 | 0,18  | 0,658866873 | -0,26 | 0,587735967 |
| Gatc    | -0,37 | 0,513822814 | -0,42 | 0,673871757 | -0,33 | 0,683917899 | -0,14 | 0,878911014 | -0,16 | 0,884248437 |
| Gatm    | -0,24 | 0,744205992 | -0,29 | 0,664765388 | 0,19  | 0,862146599 | -0,26 | 0,475952768 | -0,66 | 0,146960218 |
| Gatsl2  | -0,04 | 0,939788769 | -0,37 | 0,695689103 | 0,49  | 0,252464368 | 0,46  | 0,566850346 | -0,61 | 0,57707001  |
| Gatsl3  | -0,47 | 0,545805455 | -0,16 | 0,851830452 | 0,07  | 0,953074345 | -2,18 | 0,007250152 | -0,86 | 0,102038175 |
| Gba     | 0,57  | 0,244269955 | -0,07 | 0,882847123 | 0,19  | 0,823823322 | 0,22  | 0,533965374 | 0,02  | 0,980945466 |
| Gba2    | -0,37 | 0,551135898 | -0,33 | 0,702757763 | 0,21  | 0,859578966 | -0,96 | 0,042921835 | -0,54 | 0,476763678 |
| Gbas    | -0,27 | 0,464939452 | -0,35 | 0,818613446 | -0,65 | 0,323989114 | 0,67  | 0,737607953 | 0,84  | 0,654016085 |
| Gbe1    | 0     | 0,998210173 | 0,85  | 0,158696948 | 0     | 0,999329448 | -0,64 | 0,214242928 | 1,35  | 0,048272729 |
| Gbf1    | -0,1  | 0,884923261 | -0,31 | 0,628779499 | 0,36  | 0,576712107 | 0,54  | 0,226286594 | -0,08 | 0,92519473  |
| Gbgt1   | 0,17  | 0,785491059 | 0,29  | 0,753679288 | -0,09 | 0,935778422 | -0,16 | 0,686514009 | -0,14 | 0,887815327 |
| Gbp10   | 1,84  | 0,183050028 | 2,56  | 0,013071578 | -4,17 | 6,91718E-05 | 0,14  | 0,730467863 | 3,06  | 0,000336363 |
| Gbp11   | 4,18  | 0,002092986 | 4,17  | 0,040620931 | -4,33 | 0,000045362 | 0,34  | 0,672775602 | 4,82  | 0,00018276  |
| Gbp2    | 1,31  | 0,389268664 | 1,57  | 0,094438943 | -3,56 | 0,002364432 | 0,74  | 0,325056024 | 2,43  | 0,005031911 |
| Gbp2b   | 5,36  | 0,169313016 | 0,07  | 0,966078321 | -0,17 | 0,864598204 | 0,42  | 0,514179455 | 0,88  | 0,109294088 |
| Gbp3    | 1,26  | 0,190706898 | 1,03  | 0,084290601 | -1,75 | 0,009489185 | 1,28  | 0,014159207 | 2,71  | 0,000660296 |
| Gbp4    | 1,49  | 0,21284035  | 0,98  | 0,080612373 | -3,5  | 2,87896E-05 | 0,46  | 0,269556487 | 1,94  | 0,003984113 |
| Gbp5    | 1,92  | 0,154960518 | 1,72  | 0,040620931 | -3,29 | 2,76692E-05 | 0,41  | 0,354518226 | 2,33  | 0,002545536 |
| Gbp7    | 1,51  | 0,268112899 | 0,95  | 0,129214485 | -2,97 | 0,000687908 | 0,4   | 0,607476821 | 2,05  | 0,013431226 |
| Gbp8    | 3,26  | 0,016666769 | 3,9   | 0,040620931 | -4,49 | 2,76692E-05 | -0,81 | 0,355997334 | 4,63  | 0,000336363 |
| Gbp9    | 0,77  | 0,268283142 | 0,8   | 0,121458348 | -1,8  | 0,00990492  | -0,02 | 0,974087645 | 1,24  | 0,01813934  |
| Gbx1    | -0,53 | 0,322835282 | -0,39 | 0,537678815 | 0,08  | 0,904406621 | 0,01  | 0,992323442 | -0,35 | 0,601205261 |
| Gbx2    | 0,29  | 0,656318528 | 0,15  | 0,775155136 | 0,02  | 0,987003605 | -0,1  | 0,839149192 | -0,31 | 0,712786855 |
| Gc      | 0     | 0,996259311 | 0,12  | 0,916496897 | 0,02  | 0,988661889 | -0,43 | 0,691718699 | 1,17  | 0,369835412 |
| Gca     | -0,21 | 0,696873129 | 0,35  | 0,866248527 | 1,05  | 0,55470787  | -0,38 | 0,748929665 | 0,44  | 0,792404969 |
| Gcat    | -0,37 | 0,496123406 | -0,13 | 0,934480412 | 0,7   | 0,493780438 | -0,56 | 0,149519451 | 0     | 0,997794713 |
| Gcc1    | -0,23 | 0,702001327 | 0,24  | 0,670412523 | -0,19 | 0,760531859 | -0,59 | 0,174848313 | 0,09  | 0,930863234 |
| Gcc2    | -0,17 | 0,676906193 | -0,17 | 0,897645724 | 0,04  | 0,969928932 | 0,15  | 0,895880186 | -0,56 | 0,666055303 |
| Gcdh    | 0,23  | 0,782889069 | 0,04  | 0,983028198 | 0,73  | 0,462643491 | -0,78 | 0,067122689 | -1,25 | 0,103208118 |
| Gcfc2   | -0,01 | 0,994017749 | -0,43 | 0,656542439 | 0,14  | 0,839096222 | -0,26 | 0,665832473 | -0,51 | 0,520314212 |
| Gcg     | -0,22 | 0,739638841 | -0,27 | 0,745602001 | -0,53 | 0,313378726 | -0,05 | 0,908141892 | -0,08 | 0,925858284 |
| Gcgr    | -0,16 | 0,777335496 | 0,13  | 0,823859284 | 0,01  | 0,993379272 | -0,65 | 0,152982    | -0,25 | 0,702993783 |
| Gch1    | 0,46  | 0,306843087 | 0,27  | 0,615893783 | -0,1  | 0,917672398 | -0,1  | 0,825982087 | 0,37  | 0,525387388 |
| Gchfr   | -0,81 | 0,343001966 | -1,23 | 0,123975096 | 0,95  | 0,038925327 | -0,22 | 0,677149441 | -1,28 | 0,020323407 |

|         |       |             |       |             |       |             |       |             |       |             |
|---------|-------|-------------|-------|-------------|-------|-------------|-------|-------------|-------|-------------|
| Gck     | 0,22  | 0,640002115 | 0,38  | 0,436556718 | -0,21 | 0,721952929 | -0,3  | 0,316502792 | -0,08 | 0,943668392 |
| Gckr    | 0,04  | 0,955276549 | -0,05 | 0,973945454 | 0,23  | 0,740579016 | 0     | 0,995663642 | -0,56 | 0,289343983 |
| Gclc    | 0     | 0,998927419 | -0,32 | 0,580042259 | 0,06  | 0,96858449  | -0,39 | 0,326805214 | 0,09  | 0,915395762 |
| Gclm    | -0,04 | 0,95538722  | -0,7  | 0,493391321 | -0,1  | 0,945452327 | 0,38  | 0,617056035 | 0,28  | 0,565817768 |
| Gcm1    | -0,25 | 0,704720946 | -0,27 | 0,530207532 | 0,11  | 0,884553705 | 0,37  | 0,472790446 | 0,1   | 0,935493196 |
| Gcm2    | 0,25  | 0,662854107 | 0,05  | 0,952178482 | -0,06 | 0,953345773 | 0,11  | 0,809114132 | 0,24  | 0,666032606 |
| Gcn111  | -0,49 | 0,272587269 | 0,01  | 0,997700959 | 0,35  | 0,522643974 | 0,22  | 0,839256491 | -0,22 | 0,858534673 |
| Gcnt1   | 0,18  | 0,904491579 | 0,14  | 0,899624796 | 0,46  | 0,73893881  | -4,18 | 0,003863434 | -0,33 | 0,715928244 |
| Gcnt2   | -0,5  | 0,293334505 | -0,38 | 0,649611595 | 0,55  | 0,544756897 | -0,52 | 0,2484156   | -0,28 | 0,699060093 |
| Gcnt3   | 0,27  | 0,769299413 | -0,07 | 0,90781211  | -0,18 | 0,858646182 | -0,15 | 0,873846693 | 0,33  | 0,763240477 |
| Gcnt4   | 0,14  | 0,782889069 | 0,12  | 0,885724648 | 0,31  | 0,502320307 | -0,19 | 0,776545078 | -0,23 | 0,745958051 |
| Gcnt7   | -0,01 | 0,995438679 | -0,05 | 0,940525711 | -0,25 | 0,668633375 | 0,01  | 0,984106952 | -0,02 | 0,984125319 |
| Gcsam   | -0,04 | 0,94727537  | 0,15  | 0,781665479 | -0,14 | 0,862869965 | -0,17 | 0,707780982 | -0,24 | 0,832289552 |
| Gda     | -0,53 | 0,417009267 | -0,15 | 0,746439988 | -0,05 | 0,966647226 | 1,82  | 0,061664353 | -0,03 | 0,984724142 |
| Gdap1   | -0,98 | 0,205139432 | 0,3   | 0,805135188 | -0,32 | 0,628048897 | 0,04  | 0,970406067 | -0,32 | 0,676744294 |
| Gdap10  | 1,77  | 0,016666769 | 1,21  | 0,094438943 | -1,16 | 0,140777124 | -0,27 | 0,741765786 | 1,4   | 0,060191534 |
| Gdap111 | 0,56  | 0,575746847 | 0,53  | 0,531518093 | -0,2  | 0,791876238 | -0,08 | 0,920094781 | 0,06  | 0,9478833   |
| Gdap2   | 0,17  | 0,82858092  | -0,01 | 0,994137877 | -0,06 | 0,973095129 | -0,47 | 0,368725311 | -0,18 | 0,860292816 |
| Gde1    | -0,09 | 0,926692467 | -0,39 | 0,614530823 | 0,52  | 0,592369467 | -0,02 | 0,982212444 | -0,27 | 0,686049613 |
| Gdf10   | 0,67  | 0,194613044 | 0,37  | 0,508112801 | -0,07 | 0,944441051 | -0,93 | 0,027993186 | -0,26 | 0,781777975 |
| Gdf11   | 0,59  | 0,277692472 | 0,72  | 0,187291785 | 0,66  | 0,443341184 | 0,21  | 0,797009622 | 0,02  | 0,989767278 |
| Gdf15   | -0,08 | 0,899079341 | 0,3   | 0,574304911 | -0,58 | 0,552093103 | -1,19 | 0,050236686 | 1,4   | 0,05100134  |
| Gdf2    | 0,22  | 0,617280733 | 0,11  | 0,842793123 | 0,25  | 0,577305336 | -0,04 | 0,952409831 | -0,39 | 0,498553997 |
| Gdf3    | 0,21  | 0,592176997 | 0     | 0,999395995 | -0,02 | 0,987356432 | -0,04 | 0,923775458 | -0,32 | 0,551972106 |
| Gdf5    | 0,14  | 0,831276898 | -0,01 | 0,997344247 | 0,12  | 0,882248195 | 0,07  | 0,899335603 | 0     | 0,997299415 |
| Gdf6    | 0,08  | 0,881663401 | 0,21  | 0,792290003 | -0,26 | 0,640924712 | 0,06  | 0,9324626   | 0,08  | 0,947437555 |
| Gdf7    | 0,11  | 0,810208393 | 0,06  | 0,909575246 | -0,32 | 0,487870604 | 0,05  | 0,896599656 | 0,29  | 0,565598886 |
| Gdf9    | -0,1  | 0,930078431 | -0,06 | 0,946864476 | 0,19  | 0,808538071 | 0,25  | 0,795215066 | -0,46 | 0,524829864 |
| Gdi1    | -0,17 | 0,703606438 | 0,09  | 0,859585789 | 0,24  | 0,680381632 | -0,49 | 0,16659661  | -0,18 | 0,755677288 |
| Gdi2    | -0,03 | 0,958512892 | -0,15 | 0,831580851 | 0,16  | 0,824682741 | 0,79  | 0,136691359 | 0,12  | 0,879206646 |
| Gdnf    | -0,05 | 0,957427783 | 0,25  | 0,670859269 | -0,15 | 0,864053515 | -0,24 | 0,80795564  | -0,02 | 0,985982505 |
| Gdpd1   | -0,14 | 0,882060783 | 0,26  | 0,709432782 | 0,31  | 0,770526999 | -0,1  | 0,938689944 | -0,71 | 0,426549004 |
| Gdpd2   | 0,66  | 0,296031134 | -0,75 | 0,30567226  | -0,17 | 0,859411859 | 0,58  | 0,247679503 | -0,64 | 0,241262726 |
| Gdpd3   | 0,1   | 0,950532575 | 0,51  | 0,394656972 | 0,01  | 0,996325467 | 0,11  | 0,779547737 | 0,04  | 0,973428839 |
| Gdpd4   | 0,34  | 0,62320005  | 0,12  | 0,904399112 | -0,24 | 0,727913388 | -0,01 | 0,994986217 | -0,13 | 0,88288747  |

|        |       |             |       |             |       |             |       |             |       |             |
|--------|-------|-------------|-------|-------------|-------|-------------|-------|-------------|-------|-------------|
| Gdpd5  | -0,96 | 0,185199856 | -0,59 | 0,385387329 | 0,64  | 0,35180566  | 0,81  | 0,195080843 | -1,28 | 0,058814936 |
| Gdpgp1 | -0,46 | 0,553920143 | -0,25 | 0,791642883 | 0,24  | 0,885042765 | -0,8  | 0,468562522 | -0,99 | 0,507222763 |
| Gem    | -0,1  | 0,89763852  | -0,1  | 0,894205636 | -0,14 | 0,815951038 | 0,7   | 0,153290864 | 0,47  | 0,454711077 |
| Gemin2 | -0,76 | 0,260634235 | 0,46  | 0,691433995 | 0,45  | 0,720590502 | -0,66 | 0,165050366 | -0,4  | 0,509225183 |
| Gemin4 | -0,06 | 0,94913976  | 0,02  | 0,991326833 | 0,19  | 0,715363951 | 0,05  | 0,928002892 | -0,13 | 0,914960168 |
| Gemin5 | -0,59 | 0,239601221 | -0,41 | 0,473163236 | 0,55  | 0,389647325 | 0,64  | 0,224643954 | -0,18 | 0,830086988 |
| Gemin6 | 0,11  | 0,926692467 | -0,37 | 0,459417799 | 1,03  | 0,193368921 | 1,08  | 0,045013657 | 0,13  | 0,864540232 |
| Gemin7 | 0,11  | 0,867025523 | 0,28  | 0,690405217 | 0,55  | 0,340237423 | -0,14 | 0,848013758 | 0,38  | 0,773421155 |
| Gen1   | -0,95 | 0,172698611 | -1,33 | 0,503418024 | 0,46  | 0,725191296 | 1,62  | 0,118061566 | -0,21 | 0,861604824 |
| Get4   | -0,38 | 0,508360835 | -0,08 | 0,906777728 | 0,58  | 0,568962531 | 0,69  | 0,235443733 | 0,14  | 0,890957032 |
| Gfap   | 0,11  | 0,856984761 | 0,23  | 0,548858367 | 0,02  | 0,977126842 | -0,1  | 0,816053567 | 0,24  | 0,680547789 |
| Gfer   | -0,42 | 0,668945193 | 0,13  | 0,855632384 | -0,13 | 0,855523214 | 0,37  | 0,385426561 | 0,03  | 0,979456872 |
| Gfi1   | -0,24 | 0,638735898 | 0,13  | 0,92046066  | -0,06 | 0,961854046 | -0,43 | 0,340897191 | -0,46 | 0,279046828 |
| Gfi1b  | 0,53  | 0,320537801 | 0,42  | 0,534086923 | -0,1  | 0,916721976 | -0,45 | 0,665208114 | 0,05  | 0,975441362 |
| Gfm1   | -0,55 | 0,378598836 | -0,58 | 0,208445991 | 0,08  | 0,959912236 | 0,4   | 0,664457643 | -0,35 | 0,739121045 |
| Gfm2   | -0,07 | 0,948926586 | -0,47 | 0,450538273 | -0,23 | 0,915967285 | 0,2   | 0,525409031 | -0,04 | 0,979456872 |
| Gfod1  | 0,14  | 0,867953985 | 0,41  | 0,459417799 | 0,61  | 0,187886508 | 1     | 0,051384091 | -0,05 | 0,968952017 |
| Gfod2  | -0,22 | 0,620468351 | 0,1   | 0,912137323 | -0,1  | 0,90228001  | -0,77 | 0,078262882 | -0,05 | 0,966951657 |
| Gfpt1  | 0,16  | 0,823793867 | -0,14 | 0,767334174 | 0,06  | 0,955586257 | 1,89  | 0,008743376 | 0     | 0,999775166 |
| Gfpt2  | -0,92 | 0,305576766 | -0,2  | 0,932292974 | 1,22  | 0,033719197 | -1,36 | 0,018183641 | 0,43  | 0,545166604 |
| Gfra1  | 0,07  | 0,941798404 | -0,2  | 0,705845461 | -0,03 | 0,979762529 | 0,36  | 0,552557581 | -0,41 | 0,602231893 |
| Gfra2  | 0,11  | 0,902628825 | -0,38 | 0,561562373 | -0,14 | 0,824505865 | -0,65 | 0,120154902 | -0,26 | 0,645147928 |
| Gfra3  | 0,04  | 0,971465817 | -0,43 | 0,508065278 | -0,36 | 0,656878693 | -0,07 | 0,943143586 | -0,26 | 0,766559546 |
| Gfra4  | -0,32 | 0,573098005 | 0     | 1           | 0,21  | 0,750624323 | -0,08 | 0,868680052 | 0,24  | 0,740020498 |
| Gfral  | 0,19  | 0,746052863 | -0,25 | 0,677026666 | -0,49 | 0,213326049 | -0,04 | 0,967866794 | 0,07  | 0,953297732 |
| Gfy    | -0,09 | 0,922537256 | -0,66 | 0,448796542 | 0,34  | 0,416340333 | 0,14  | 0,859177093 | -0,35 | 0,737904364 |
| Gga1   | -0,41 | 0,497385733 | -0,02 | 0,970062026 | 0,05  | 0,943144399 | 0,22  | 0,521184735 | -0,14 | 0,84854054  |
| Gga2   | -0,77 | 0,235549559 | -0,99 | 0,236012745 | 1,34  | 0,207797844 | 0,71  | 0,278825037 | -0,56 | 0,608004947 |
| Gga3   | 0,19  | 0,720994301 | -0,04 | 0,981914565 | -0,35 | 0,600679499 | -0,78 | 0,30875322  | 0,1   | 0,935100205 |
| Ggact  | 0,02  | 0,981100832 | -0,43 | 0,397833962 | 0,53  | 0,624057916 | 0,21  | 0,811871922 | -0,36 | 0,712793529 |
| Ggct   | 1,12  | 0,106297932 | 0,37  | 0,724196236 | -0,4  | 0,616504992 | 0,39  | 0,373265213 | 1,68  | 0,005768202 |
| Ggcx   | -0,2  | 0,74764092  | -0,33 | 0,431022747 | -0,09 | 0,922318683 | -0,05 | 0,921731995 | -0,36 | 0,53037695  |
| Ggh    | 0,02  | 0,976574175 | -0,96 | 0,277253387 | 0,6   | 0,66424919  | -0,96 | 0,091512953 | -0,39 | 0,462558109 |
| Ggn    | 0,3   | 0,513512947 | 0,01  | 0,996113371 | 0,25  | 0,856046789 | -0,16 | 0,895221658 | -0,42 | 0,728578071 |
| Ggnbp1 | -0,02 | 0,98297164  | -0,04 | 0,978741224 | 0,09  | 0,906301115 | -0,01 | 0,995108942 | 0,22  | 0,747828814 |



|        |       |             |       |             |       |             |       |             |       |             |
|--------|-------|-------------|-------|-------------|-------|-------------|-------|-------------|-------|-------------|
| Ggnbp2 | 0,2   | 0,717407143 | 0,55  | 0,450538273 | -0,06 | 0,934813979 | 0,24  | 0,700603284 | 0,71  | 0,165955041 |
| Ggps1  | 0,11  | 0,821267687 | 0,35  | 0,363748564 | -0,03 | 0,973341568 | 0,05  | 0,951947057 | 0,29  | 0,697818445 |
| Ggt1   | -0,03 | 0,98608257  | -0,24 | 0,82505545  | 0,16  | 0,873583602 | -1,26 | 0,207023714 | 0,66  | 0,723262402 |
| Ggt5   | 0,37  | 0,639006791 | 0,04  | 0,952099316 | 0,08  | 0,926779779 | 0,28  | 0,577432583 | -0,45 | 0,559845734 |
| Ggt6   | -0,03 | 0,972164346 | 0,28  | 0,832968521 | -0,14 | 0,855381787 | -0,41 | 0,588987424 | -0,62 | 0,227687174 |
| Ggt7   | -0,05 | 0,958512892 | 0,29  | 0,490598951 | -0,18 | 0,770526999 | -0,36 | 0,33759322  | -0,32 | 0,560964387 |
| Ggta1  | -0,13 | 0,877610332 | 0,17  | 0,792434694 | -0,78 | 0,15883036  | 0,17  | 0,722330612 | 0,62  | 0,210614146 |
| Gh     | 0,39  | 0,48807403  | -0,01 | 0,996259587 | 0     | 0,997394645 | -0,09 | 0,928002892 | -0,08 | 0,951429597 |
| Ghdc   | -0,34 | 0,505077442 | -0,38 | 0,446315327 | -0,59 | 0,465949919 | 0,05  | 0,926622453 | -0,58 | 0,236565526 |
| Ghitm  | 0,42  | 0,317202788 | 0,48  | 0,295775341 | -0,14 | 0,871283127 | 0,39  | 0,387982309 | 0,73  | 0,149951093 |
| Ghr    | 0,34  | 0,497385733 | -0,25 | 0,74583457  | 0,62  | 0,393736455 | -0,38 | 0,243282227 | -0,76 | 0,16777264  |
| Ghrh   | 0,13  | 0,892949421 | 0,44  | 0,559630539 | -0,14 | 0,894339966 | -0,45 | 0,325829479 | -0,32 | 0,600537288 |
| Ghrhr  | -0,08 | 0,905818004 | 0,59  | 0,246785885 | -0,59 | 0,157817229 | -0,54 | 0,324794827 | -0,19 | 0,826207788 |
| Ghrl   | 0,76  | 0,154960518 | -0,49 | 0,670682838 | 0,15  | 0,857100866 | 0,17  | 0,737366847 | 0,02  | 0,979456872 |
| Ghsr   | 0,04  | 0,964124037 | -0,04 | 0,956935029 | -0,02 | 0,990485372 | 0,06  | 0,914828446 | 0,12  | 0,904636459 |
| Gid4   | -0,52 | 0,364497258 | -0,43 | 0,585308878 | 0,03  | 0,978012085 | 0,27  | 0,455993377 | -0,41 | 0,419557334 |
| Gid8   | -0,25 | 0,632511582 | 0,29  | 0,753679288 | 0,67  | 0,542385406 | 0,32  | 0,70537473  | 0,3   | 0,707200675 |
| Gif    | 0,11  | 0,908569912 | -0,01 | 0,994567885 | -0,2  | 0,879127552 | 0,47  | 0,247845465 | 0,26  | 0,716979399 |
| Gigyf1 | 0,01  | 0,992615147 | -0,18 | 0,829839151 | 0,32  | 0,668625627 | 0,1   | 0,869148815 | -0,02 | 0,98526902  |
| Gigyf2 | -0,14 | 0,892974912 | -0,08 | 0,928134372 | -0,3  | 0,599364835 | -0,05 | 0,931639562 | -0,05 | 0,958259949 |
| Gimap1 | -0,04 | 0,958512892 | 0,23  | 0,560357477 | -0,39 | 0,530264141 | -0,47 | 0,325923875 | 0,07  | 0,953297732 |
| Gimap3 | -0,5  | 0,399784464 | 0,24  | 0,609791675 | -0,82 | 0,47576046  | -2,74 | 0,096085093 | 0,23  | 0,9162287   |
| Gimap4 | 0,23  | 0,595245851 | 0,37  | 0,370515616 | -1,8  | 0,004497718 | -0,16 | 0,654016303 | 0,28  | 0,574285481 |
| Gimap5 | 0,67  | 0,143037124 | 0,7   | 0,128762366 | -1,33 | 0,041414494 | -0,73 | 0,152952736 | 0,4   | 0,492214222 |
| Gimap6 | 0,3   | 0,45798569  | 0,21  | 0,581950526 | -0,24 | 0,705621758 | -0,46 | 0,17421446  | 0,12  | 0,852287138 |
| Gimap7 | -0,14 | 0,871622679 | -0,04 | 0,950478648 | -0,12 | 0,920858287 | -0,49 | 0,389981292 | 0,37  | 0,654872635 |
| Gimap8 | 0,08  | 0,877675489 | 0,04  | 0,982466032 | -0,29 | 0,592417208 | -0,2  | 0,756796047 | 0,44  | 0,559721978 |
| Gimap9 | 0,3   | 0,576555049 | 0,81  | 0,174744147 | -0,11 | 0,941063967 | -0,15 | 0,817794705 | 1,4   | 0,023214623 |
| Gimd1  | -0,02 | 0,973883276 | 0     | 1           | 0,14  | 0,817818413 | -0,05 | 0,919889648 | -0,04 | 0,977247356 |
| Gin1   | -0,25 | 0,755100499 | -0,06 | 0,910184435 | 0,43  | 0,552970779 | -0,34 | 0,342955376 | -0,12 | 0,883154336 |
| Ginm1  | -0,19 | 0,761457464 | -0,21 | 0,574304911 | 0,28  | 0,750027264 | -0,28 | 0,488026149 | -0,43 | 0,356604653 |
| Gins1  | -2,21 | 0,104092085 | -2,67 | 0,129214485 | 2,39  | 0,097897914 | 2,09  | 0,129101197 | -0,46 | 0,788112596 |
| Gins2  | -0,64 | 0,232916935 | -1,59 | 0,235726512 | 0,84  | 0,09059546  | 1,95  | 0,046886999 | 0,1   | 0,903241997 |
| Gins3  | -0,54 | 0,660566503 | -0,11 | 0,857408462 | -0,02 | 0,983471086 | 0,18  | 0,712115859 | 0,11  | 0,937536158 |
| Gins4  | -0,51 | 0,414844288 | -0,08 | 0,932292974 | 0,4   | 0,675674731 | -0,19 | 0,63665208  | -0,81 | 0,246316824 |

|       |       |             |       |             |       |             |       |             |       |             |
|-------|-------|-------------|-------|-------------|-------|-------------|-------|-------------|-------|-------------|
| Gip   | 0,32  | 0,547519398 | -0,33 | 0,59780175  | 0,16  | 0,834042944 | 0,72  | 0,074540949 | 0,27  | 0,655657337 |
| Gipc1 | -0,4  | 0,358271337 | -0,54 | 0,325242663 | 0,35  | 0,64473731  | 0,63  | 0,307458691 | -0,57 | 0,449864591 |
| Gipc2 | -0,2  | 0,841686611 | 0,16  | 0,874356923 | 0,26  | 0,842767638 | 1,29  | 0,126908342 | 0,9   | 0,236669428 |
| Gipc3 | -0,17 | 0,882500171 | 0,03  | 0,971801869 | -0,06 | 0,957152002 | -1,3  | 0,04172436  | 0,37  | 0,590396118 |
| Gipr  | -0,12 | 0,866989155 | -0,18 | 0,82505545  | 0,04  | 0,973006385 | -0,06 | 0,910189972 | -0,27 | 0,664117686 |
| Git1  | -0,08 | 0,883923631 | -0,18 | 0,747728608 | 0,07  | 0,928928183 | -0,04 | 0,943143586 | -0,12 | 0,87934258  |
| Git2  | -0,32 | 0,496123406 | -0,38 | 0,565639972 | 0,03  | 0,976718324 | 0,29  | 0,648069093 | -0,56 | 0,34118587  |
| Gja1  | -0,18 | 0,686076441 | -0,21 | 0,708684603 | 0,31  | 0,514610288 | 1,84  | 0,012175785 | -0,17 | 0,797293554 |
| Gja10 | 0     | 0,996998625 | 0,02  | 0,975124205 | 0     | 0,997865616 | -0,02 | 0,967866794 | 0,23  | 0,680898047 |
| Gja3  | 0,12  | 0,832513798 | -0,1  | 0,825662099 | 0,12  | 0,856218874 | 0,14  | 0,801930792 | -0,01 | 0,992370267 |
| Gja4  | 0     | 0,999218248 | 0,01  | 0,991131565 | -0,41 | 0,474517891 | -0,73 | 0,072155228 | 0,2   | 0,728530603 |
| Gja5  | -0,16 | 0,892124736 | -0,01 | 0,998513452 | -0,19 | 0,896728577 | -1,11 | 0,129101197 | 0,22  | 0,787325394 |
| Gja6  | 0     | 0,998027251 | 0,14  | 0,847473714 | 0,21  | 0,699879486 | 0,17  | 0,711064066 | 1,03  | 0,053873233 |
| Gja8  | 0,14  | 0,816465857 | 0,12  | 0,875828468 | -0,07 | 0,914867655 | -0,13 | 0,845813504 | 0     | 0,9969305   |
| Gjb1  | 0,04  | 0,965116762 | 0,23  | 0,642151308 | -0,36 | 0,452872263 | -0,38 | 0,368956303 | -0,07 | 0,92519473  |
| Gjb2  | 0,14  | 0,828767158 | 0,01  | 0,994137877 | -0,19 | 0,844854601 | -0,6  | 0,146784762 | 1,12  | 0,117149411 |
| Gjb3  | 0,25  | 0,820625022 | 0,29  | 0,742730285 | 0,91  | 0,158177551 | -0,34 | 0,267542326 | -0,14 | 0,872104386 |
| Gjb4  | 0,14  | 0,803737003 | 0,25  | 0,839789639 | 0,89  | 0,19907753  | -0,22 | 0,731120092 | -0,28 | 0,702402249 |
| Gjb5  | 0,39  | 0,358649205 | -0,04 | 0,964757836 | -0,17 | 0,78534601  | -0,14 | 0,67600396  | 0,36  | 0,549450339 |
| Gjb6  | -0,31 | 0,500870793 | -0,27 | 0,704681588 | -0,23 | 0,704687187 | 0,22  | 0,604842873 | -0,07 | 0,951429597 |
| Gjc1  | -0,19 | 0,748619201 | 0,06  | 0,967383815 | 0,32  | 0,526099018 | -1,05 | 0,155086275 | 0,49  | 0,373939046 |
| Gjc2  | -0,02 | 0,986150521 | 0,07  | 0,912535732 | -0,21 | 0,780077469 | -0,09 | 0,845164782 | -0,29 | 0,653389826 |
| Gjc3  | 0,51  | 0,239601221 | 0,08  | 0,848821789 | -0,01 | 0,996265665 | 0,16  | 0,800447608 | 0,18  | 0,831834722 |
| Gjd2  | 0,34  | 0,469736745 | 0,17  | 0,700297886 | -0,22 | 0,735003288 | 0,11  | 0,797109702 | 0,03  | 0,983469081 |
| Gjd3  | 0,01  | 0,984040323 | 0,04  | 0,930192503 | -0,11 | 0,867034674 | 0,06  | 0,904971257 | 0,15  | 0,824727805 |
| Gjd4  | -0,11 | 0,892124736 | -0,38 | 0,40873647  | -0,17 | 0,838886828 | 0,42  | 0,319057242 | -0,25 | 0,6754671   |
| Gje1  | 0,27  | 0,553920143 | 0,19  | 0,925689176 | -0,45 | 0,432560995 | -0,08 | 0,920158794 | -0,21 | 0,788112596 |
| Gk    | -0,1  | 0,855421712 | 0,18  | 0,945143056 | 0,38  | 0,704687187 | 0,09  | 0,945566991 | 0,53  | 0,47756273  |
| Gk2   | 0,16  | 0,764824121 | -0,07 | 0,892727342 | -0,3  | 0,702677589 | 0,14  | 0,715804103 | -0,16 | 0,825966687 |
| Gk5   | 0,09  | 0,956452501 | -0,8  | 0,230688117 | 0,81  | 0,047971461 | 0     | 1           | 0,25  | 0,822628064 |
| Gkap1 | 0,44  | 0,422033372 | 0,09  | 0,877602011 | -0,03 | 0,976042637 | -0,49 | 0,271252298 | -0,41 | 0,630151021 |
| Gkn1  | 1,94  | 0,07296666  | 0,69  | 0,418418761 | -0,17 | 0,927301763 | 1,64  | 0,024040886 | -0,02 | 0,986971861 |
| Gkn2  | 0,05  | 0,959985598 | 0,08  | 0,927582737 | -0,15 | 0,770376922 | -0,04 | 0,967866794 | -0,32 | 0,536639649 |
| Gkn3  | 0,2   | 0,735860437 | 0,49  | 0,41028104  | -0,15 | 0,847688308 | -3,03 | 0,005487532 | -1,6  | 0,031762043 |
| Gla   | 0,25  | 0,751237683 | -0,03 | 0,986396264 | 0,31  | 0,786437147 | 0,09  | 0,96721366  | 0,56  | 0,658322776 |

|          |       |             |       |             |       |             |       |             |       |             |
|----------|-------|-------------|-------|-------------|-------|-------------|-------|-------------|-------|-------------|
| Glb1     | -0,15 | 0,820023436 | -0,06 | 0,927205716 | 0,25  | 0,804012085 | 1,5   | 0,052424276 | -0,39 | 0,601077802 |
| Glb1l    | -0,8  | 0,576555049 | -0,43 | 0,715688609 | 0,13  | 0,939684708 | 0,63  | 0,668172414 | 0,75  | 0,673120647 |
| Glb1l2   | 0,18  | 0,764288636 | -0,28 | 0,631728257 | -0,12 | 0,906747817 | -0,03 | 0,968643827 | 0,35  | 0,609595396 |
| Glb1l3   | 0,11  | 0,816534187 | 0,33  | 0,613449608 | -0,48 | 0,302861841 | -0,22 | 0,628198543 | 0,04  | 0,974110019 |
| Glcci1   | -0,06 | 0,935644409 | 0,04  | 0,962980292 | 0,2   | 0,729592327 | 0,75  | 0,114645262 | 0,21  | 0,777805633 |
| Glce     | -0,28 | 0,648730873 | 0,06  | 0,943915456 | 0,21  | 0,757980709 | -0,31 | 0,7632476   | -0,19 | 0,89761151  |
| Gldc     | -0,15 | 0,841947762 | 0,49  | 0,561004864 | -0,36 | 0,628048897 | -0,61 | 0,257722129 | -0,28 | 0,69063878  |
| Gldn     | 0,2   | 0,676668915 | -0,25 | 0,773156885 | -0,19 | 0,770526999 | 0,34  | 0,449259448 | -0,02 | 0,985269236 |
| Gldnos   | 0,14  | 0,820785667 | 0,22  | 0,733180951 | -0,31 | 0,473593056 | 0,24  | 0,504114639 | 0,09  | 0,922424838 |
| Gle1     | -0,36 | 0,613990129 | -0,38 | 0,389951506 | -0,01 | 0,98722236  | -0,24 | 0,741452902 | -0,31 | 0,682929195 |
| Glg1     | -0,11 | 0,851543807 | -0,04 | 0,970762922 | 0,45  | 0,440917162 | 0,16  | 0,875993251 | -0,08 | 0,94920559  |
| Gli1     | -0,02 | 0,990404752 | 0,27  | 0,772558681 | -0,22 | 0,76031147  | -0,43 | 0,504812185 | 0,34  | 0,701874538 |
| Gli2     | -0,31 | 0,648730873 | -0,14 | 0,829839151 | 0,34  | 0,599127793 | 0,2   | 0,785397142 | -0,02 | 0,984125319 |
| Gli3     | -0,26 | 0,656726345 | 0,05  | 0,979002922 | 0,03  | 0,988373086 | -0,16 | 0,820745707 | -0,06 | 0,958728452 |
| Glipr1   | -0,31 | 0,803737003 | -0,11 | 0,932292974 | 2,04  | 0,213830237 | 0,27  | 0,817029982 | 0,3   | 0,860292816 |
| Glipr1l1 | -0,25 | 0,824728873 | -0,43 | 0,543900329 | 0,1   | 0,952366138 | 1,04  | 0,380444012 | 0,37  | 0,830077903 |
| Glipr1l2 | -0,01 | 0,991516118 | -0,12 | 0,825210924 | -0,29 | 0,628048897 | 0,48  | 0,323830449 | 0,09  | 0,910249438 |
| Glipr1l3 | 0,07  | 0,950011132 | -0,5  | 0,561842393 | 0,09  | 0,895434884 | 0,61  | 0,316860293 | 0,27  | 0,668008337 |
| Glipr2   | 0,34  | 0,524084565 | 1,08  | 0,104392193 | -0,68 | 0,36945384  | 1,17  | 0,075520945 | 1,04  | 0,209884297 |
| Glis1    | 0,14  | 0,816710776 | -0,17 | 0,752804236 | 0,01  | 0,993379272 | 0,21  | 0,683342816 | 0,16  | 0,823098095 |
| Glis2    | -0,21 | 0,764288636 | -0,12 | 0,864363741 | 0,45  | 0,325974926 | 0,61  | 0,373249226 | 0,24  | 0,82517732  |
| Glis3    | 0,6   | 0,239601221 | 0,15  | 0,945143056 | -0,31 | 0,772397144 | 0,26  | 0,814810741 | -0,39 | 0,687229846 |
| Glmn     | -0,84 | 0,17366966  | -0,02 | 0,990380046 | 0,62  | 0,489556221 | -0,05 | 0,969377207 | -1,13 | 0,176186731 |
| Glmp     | 0,26  | 0,582758865 | 0,1   | 0,895950162 | 0,17  | 0,811480974 | 0,21  | 0,774359285 | -0,17 | 0,88022108  |
| Glo1     | -0,1  | 0,825308689 | -0,29 | 0,55478638  | 0,1   | 0,934354994 | 1,23  | 0,075614088 | -0,19 | 0,864540232 |
| Glod4    | -0,19 | 0,733812233 | -0,43 | 0,425488588 | 0,35  | 0,727548313 | 0,16  | 0,794368434 | 0,16  | 0,876418697 |
| Glod5    | -0,66 | 0,187868882 | -0,63 | 0,602549494 | 0,66  | 0,316219499 | 3,57  | 0,031868323 | -0,27 | 0,877669996 |
| Glp1r    | 0,13  | 0,933039028 | 0,48  | 0,559617305 | -0,21 | 0,877598693 | -1,55 | 0,01321417  | -0,86 | 0,37231538  |
| Glp2r    | -0,01 | 0,990404752 | 0,1   | 0,926157704 | -0,24 | 0,660610212 | -0,09 | 0,891975149 | 0,17  | 0,825990389 |
| Glra1    | -0,07 | 0,929247775 | -0,05 | 0,943915456 | -0,31 | 0,501058575 | 0,36  | 0,303116085 | -0,45 | 0,587915673 |
| Glra2    | -0,11 | 0,896249068 | 0     | 1           | -0,09 | 0,935168506 | 0     | 0,999221046 | 0,16  | 0,819172843 |
| Glra3    | 0,26  | 0,65525391  | 0,1   | 0,954948291 | 0,14  | 0,863833849 | 0,02  | 0,988740719 | 0,11  | 0,953297732 |
| Glra4    | 0,52  | 0,496008309 | 0,46  | 0,641792237 | 0,15  | 0,795128728 | -0,4  | 0,57095196  | -0,29 | 0,697757911 |
| Glr1b    | 0,28  | 0,61807202  | -0,17 | 0,813423328 | -0,07 | 0,907951869 | 0,09  | 0,829908689 | 0,14  | 0,893117638 |
| Glrp1    | 0,19  | 0,79249191  | 0,01  | 0,992175086 | -0,23 | 0,670137495 | 0,04  | 0,932800758 | -0,16 | 0,845218636 |

|          |       |             |       |             |       |             |       |             |       |             |
|----------|-------|-------------|-------|-------------|-------|-------------|-------|-------------|-------|-------------|
| Glrx     | 1,26  | 0,175830295 | 0,97  | 0,142297228 | -0,96 | 0,060717312 | 1,79  | 0,012175785 | 0,27  | 0,673577848 |
| Glrx2    | -0,04 | 0,981308673 | 0,54  | 0,541469535 | 0,27  | 0,77587992  | -0,45 | 0,25949989  | -0,27 | 0,608072805 |
| Glrx3    | -0,45 | 0,617280733 | -0,8  | 0,147385944 | 0,35  | 0,85833551  | 1,4   | 0,062125207 | -0,62 | 0,576777161 |
| Glrx5    | -0,54 | 0,179001759 | -0,49 | 0,314703215 | 0,1   | 0,923396625 | 1,02  | 0,035059836 | -0,56 | 0,278240482 |
| Gls      | 0,4   | 0,658266451 | 0,57  | 0,277253387 | 0,1   | 0,887998113 | -0,52 | 0,616285736 | 0,16  | 0,917779543 |
| Gls2     | 0,26  | 0,752042687 | -0,43 | 0,506004277 | 0,57  | 0,601604534 | 0,49  | 0,512935647 | -0,12 | 0,913638841 |
| Glt1d1   | 0,11  | 0,869225685 | -0,04 | 0,958187617 | -0,32 | 0,573330898 | -0,29 | 0,539592575 | -0,07 | 0,937446198 |
| Glt28d2  | 0,18  | 0,895278749 | -0,63 | 0,230688117 | 1,25  | 0,21870601  | -0,63 | 0,382907979 | -0,64 | 0,48885065  |
| Glt6d1   | 0,67  | 0,425285092 | -0,13 | 0,936502479 | -0,17 | 0,861307315 | 0,06  | 0,964799895 | -0,11 | 0,919802054 |
| Glt8d1   | -0,35 | 0,775122619 | 0,23  | 0,690627372 | 0,34  | 0,841563482 | -0,23 | 0,538229097 | -0,37 | 0,454039023 |
| Glt8d2   | -0,12 | 0,859085937 | 0,28  | 0,697372426 | -0,15 | 0,891782315 | -0,22 | 0,560823199 | 0,22  | 0,750954863 |
| Gltp     | -0,34 | 0,593540946 | -0,47 | 0,661976216 | -0,01 | 0,995568713 | -0,09 | 0,85447054  | 0,12  | 0,885872093 |
| Gltpd2   | 0,06  | 0,946792769 | -0,05 | 0,928267096 | 0,05  | 0,961800548 | -0,03 | 0,968211182 | -0,02 | 0,985266733 |
| Gltscr1  | 0,03  | 0,976870178 | 0,27  | 0,624712123 | 0,09  | 0,922318683 | -0,29 | 0,345798255 | -0,36 | 0,43484836  |
| Gltscr1l | 0,09  | 0,944546118 | -0,11 | 0,940161762 | -0,14 | 0,908400411 | -0,45 | 0,580120569 | -0,16 | 0,865258929 |
| Gltscr2  | -0,03 | 0,958013568 | 0,32  | 0,508633526 | -0,06 | 0,946842192 | -0,1  | 0,888184152 | 0,15  | 0,860292816 |
| Glud1    | -0,21 | 0,66946372  | 0,01  | 0,991023942 | 0,29  | 0,848462153 | 0,61  | 0,364026081 | 0,12  | 0,917356423 |
| Glul     | -0,65 | 0,269377108 | -0,4  | 0,48206644  | 0,29  | 0,542398079 | -0,92 | 0,030491027 | -0,36 | 0,486708315 |
| Glyat    | -0,67 | 0,400980668 | 0,67  | 0,678898259 | 0,38  | 0,714397348 | 0,01  | 0,995261656 | 0,73  | 0,398637431 |
| Glyatl3  | 0,36  | 0,434674431 | 0,56  | 0,400515868 | -0,12 | 0,838800785 | -0,16 | 0,863368298 | -0,12 | 0,904737757 |
| Glycam1  | 0,36  | 0,446685156 | 0,46  | 0,470112519 | 0,34  | 0,701508321 | 0,36  | 0,31450302  | -0,02 | 0,984125319 |
| Glyctk   | -0,32 | 0,589294335 | 0,24  | 0,818072947 | -0,16 | 0,854432422 | -0,61 | 0,383914763 | -0,24 | 0,762105118 |
| Glyr1    | -0,41 | 0,306770157 | -0,11 | 0,855632384 | 0,24  | 0,638689491 | 0,19  | 0,680951303 | -0,3  | 0,623214829 |
| Gm10000  | -0,46 | 0,269264884 | -0,1  | 0,910688765 | -0,31 | 0,530631025 | -0,92 | 0,115795315 | -0,4  | 0,602622607 |
| Gm10002  | 0,32  | 0,573267041 | -0,64 | 0,702991386 | 0,11  | 0,967767582 | -0,8  | 0,603152837 | -0,71 | 0,74624632  |
| Gm10006  | -0,29 | 0,561977827 | 0,5   | 0,430154065 | 0,17  | 0,792914591 | -0,22 | 0,769870404 | 0,26  | 0,750504485 |
| Gm10007  | 0,03  | 0,965116762 | 0,14  | 0,761404909 | -0,56 | 0,433353965 | -0,2  | 0,609789473 | -0,09 | 0,906227836 |
| Gm10021  | 0,68  | 0,124734826 | 0,65  | 0,344890637 | -0,96 | 0,302861841 | 1,44  | 0,017791354 | 0,37  | 0,485016273 |
| Gm10023  | 0,03  | 0,976574175 | -0,14 | 0,789051952 | 0,33  | 0,436827113 | -0,15 | 0,749306304 | -0,04 | 0,977991682 |
| Gm10024  | 0,15  | 0,811009431 | 0,11  | 0,809683705 | -0,38 | 0,493914485 | 0,05  | 0,910392734 | 0,18  | 0,771772186 |
| Gm10030  | -0,61 | 0,449954369 | 0,14  | 0,858860016 | 0,02  | 0,991240121 | 0,04  | 0,983166423 | 0,04  | 0,983617617 |
| Gm10032  | 0,12  | 0,839871081 | 0,2   | 0,640299669 | 0,24  | 0,689270883 | -0,07 | 0,914195977 | -0,28 | 0,726246366 |
| Gm10033  | -0,19 | 0,841584453 | 0,02  | 0,9860901   | 0,73  | 0,312918361 | 0,02  | 0,994638711 | 0,14  | 0,948163009 |
| Gm10037  | 0,3   | 0,664456582 | -0,05 | 0,974580396 | 0,1   | 0,938795886 | 0     | 1           | -0,15 | 0,803738269 |
| Gm10044  | -0,05 | 0,948376096 | 0,14  | 0,802734108 | -0,45 | 0,379638471 | -0,17 | 0,669517948 | 0,21  | 0,765809384 |

|         |       |             |       |             |       |             |       |             |       |             |
|---------|-------|-------------|-------|-------------|-------|-------------|-------|-------------|-------|-------------|
| Gm10046 | 0,26  | 0,683531628 | 0,15  | 0,858672146 | -0,21 | 0,809062815 | -0,22 | 0,706314848 | -0,01 | 0,991980521 |
| Gm10057 | -0,26 | 0,676387559 | 0,32  | 0,655676851 | 0,08  | 0,953951069 | 0,43  | 0,679377653 | -0,06 | 0,973162988 |
| Gm10065 | -0,03 | 0,955919722 | -0,04 | 0,93451524  | -0,19 | 0,785542164 | 0     | 1           | -0,02 | 0,981913783 |
| Gm10069 | -0,35 | 0,410041925 | 0,06  | 0,935984823 | -0,09 | 0,897233315 | -0,33 | 0,706198355 | -0,08 | 0,969117862 |
| Gm10081 | 0,32  | 0,493929    | 0,07  | 0,916255958 | 0,21  | 0,727548313 | 0,22  | 0,520461753 | 0,3   | 0,68987325  |
| Gm10091 | -0,07 | 0,90685932  | -0,07 | 0,893013712 | 0,2   | 0,837375184 | -0,72 | 0,078600315 | -0,15 | 0,830268209 |
| Gm10097 | 0,12  | 0,783929127 | 0,05  | 0,924916733 | 0,04  | 0,955303601 | 0,05  | 0,903089012 | 0,3   | 0,587915673 |
| Gm10099 | 0,32  | 0,53686867  | 0,06  | 0,890574965 | -0,11 | 0,90665     | 0,08  | 0,932803079 | 0,24  | 0,85508146  |
| Gm10100 | -0,6  | 0,316863649 | 0,42  | 0,426168855 | 0,23  | 0,749607234 | -0,22 | 0,691600442 | -0,02 | 0,980961333 |
| Gm10101 | -0,24 | 0,851879774 | -0,46 | 0,664787536 | -0,34 | 0,586255491 | 0,01  | 0,997827705 | -0,35 | 0,690188647 |
| Gm10104 | 0     | 0,997487069 | 0,11  | 0,90251322  | -0,01 | 0,990836784 | -0,1  | 0,891790388 | -0,46 | 0,407527353 |
| Gm10109 | 0,4   | 0,438167328 | -0,52 | 0,643743213 | -0,2  | 0,683633656 | 0,07  | 0,932315462 | -0,48 | 0,55122001  |
| Gm10113 | 0,2   | 0,718996404 | -0,06 | 0,928402591 | -0,09 | 0,915407865 | 0,12  | 0,819747319 | -0,14 | 0,88131673  |
| Gm10115 | 0,29  | 0,59710379  | -0,2  | 0,857503073 | 0,01  | 0,995677064 | 0,26  | 0,613137486 | 0,65  | 0,356938897 |
| Gm10118 | 0,15  | 0,778869381 | 0,02  | 0,976583732 | -0,09 | 0,894339966 | 0,2   | 0,696542281 | 0,35  | 0,651690564 |
| Gm10125 | -0,2  | 0,773356367 | -0,18 | 0,927776381 | -0,25 | 0,865318296 | -0,03 | 0,985897275 | -0,04 | 0,979456872 |
| Gm10129 | 0,07  | 0,894248924 | 0,08  | 0,865660484 | -0,14 | 0,816360932 | 0     | 0,996714438 | -0,04 | 0,962378605 |
| Gm10134 | -0,07 | 0,900340189 | 0,05  | 0,926810709 | 0,72  | 0,326707568 | -0,53 | 0,546558562 | -0,61 | 0,552033547 |
| Gm10139 | -0,03 | 0,975506993 | 0,14  | 0,842793123 | -0,52 | 0,541560473 | 0,08  | 0,869855587 | -0,58 | 0,427146889 |
| Gm10143 | -0,15 | 0,739833092 | -0,18 | 0,763005394 | -0,33 | 0,418524099 | 0,12  | 0,76520917  | -0,11 | 0,922328535 |
| Gm10152 | 0,1   | 0,867953985 | -0,33 | 0,666285906 | -0,16 | 0,79284622  | 0,18  | 0,676010477 | -0,17 | 0,848472475 |
| Gm10153 | 0,26  | 0,509815996 | 0,14  | 0,926157704 | 0,08  | 0,938833771 | -0,11 | 0,905746179 | -0,01 | 0,990091016 |
| Gm10176 | 0,01  | 0,989017567 | 0,01  | 0,994979369 | -0,16 | 0,777387225 | 0,07  | 0,910298592 | 0,13  | 0,851207222 |
| Gm10188 | -0,07 | 0,887517705 | -0,15 | 0,815791007 | -0,08 | 0,922807267 | 0,44  | 0,465045754 | -0,08 | 0,932111028 |
| Gm10190 | -0,07 | 0,892203477 | 0,08  | 0,904698551 | 0,07  | 0,912968686 | -0,14 | 0,709570719 | 0,1   | 0,881943508 |
| Gm10192 | -0,05 | 0,918428949 | -0,33 | 0,506403012 | 0,1   | 0,885556448 | 0,06  | 0,920036779 | -0,14 | 0,844455252 |
| Gm10220 | 0,18  | 0,886889675 | 0     | 1           | -0,97 | 0,398201234 | -0,21 | 0,783708375 | -0,36 | 0,616140729 |
| Gm10228 | 0,05  | 0,950669622 | 0,34  | 0,664765388 | 0,02  | 0,984778342 | -0,37 | 0,313562807 | -0,33 | 0,735192953 |
| Gm10229 | 0,05  | 0,928103232 | 0     | 0,99691664  | -0,05 | 0,946810097 | 0     | 0,996769706 | 0,14  | 0,839474287 |
| Gm10244 | 0,34  | 0,474293292 | -0,31 | 0,666450149 | -0,32 | 0,471873683 | 0     | 1           | 0,08  | 0,916900441 |
| Gm10248 | 0,1   | 0,837854131 | 0,19  | 0,807175471 | -0,53 | 0,199071989 | -0,29 | 0,608614479 | -0,19 | 0,776907684 |
| Gm10253 | 0,72  | 0,214139353 | 0,14  | 0,910595744 | -0,14 | 0,8128837   | 0,19  | 0,592457782 | 0,19  | 0,768278056 |
| Gm10258 | 1,04  | 0,44070168  | 1,44  | 0,431942204 | 0,49  | 0,702928613 | -0,22 | 0,912858228 | 0,45  | 0,785714194 |
| Gm10267 | 0,03  | 0,966775766 | 0,2   | 0,612645853 | -0,03 | 0,980801972 | -0,04 | 0,940734733 | 0,05  | 0,952753183 |
| Gm10272 | 0,3   | 0,61200942  | 0,37  | 0,732847182 | 0,15  | 0,868609956 | -0,25 | 0,671289496 | -0,09 | 0,916173996 |

|         |       |             |       |             |       |             |       |             |       |             |
|---------|-------|-------------|-------|-------------|-------|-------------|-------|-------------|-------|-------------|
| Gm10277 | -0,17 | 0,785864159 | 0,11  | 0,888531894 | 0,23  | 0,777417583 | 0,61  | 0,388085052 | 0,59  | 0,521069462 |
| Gm10278 | 0,06  | 0,90269029  | 0,03  | 0,954324398 | -0,17 | 0,826840894 | -0,02 | 0,970406067 | -0,14 | 0,83423691  |
| Gm10280 | -0,05 | 0,943079514 | 0,25  | 0,723677011 | -0,09 | 0,901816517 | -0,58 | 0,305432029 | -0,44 | 0,585298066 |
| Gm10283 | -0,08 | 0,8592718   | -0,04 | 0,926810709 | -0,16 | 0,765570799 | -0,28 | 0,523107406 | -0,22 | 0,716229308 |
| Gm10287 | 0,43  | 0,393169325 | 0,06  | 0,934294134 | -0,06 | 0,953975807 | -0,16 | 0,827026984 | -0,08 | 0,97098398  |
| Gm10295 | 0,09  | 0,892823025 | -0,09 | 0,839789639 | -0,23 | 0,68573346  | -0,1  | 0,911958998 | -0,04 | 0,975441362 |
| Gm10300 | -0,05 | 0,928103232 | -0,05 | 0,921610565 | -0,04 | 0,959650277 | -0,05 | 0,903744147 | 0,01  | 0,989838283 |
| Gm10304 | 0,18  | 0,752906757 | 0,16  | 0,77156543  | -0,24 | 0,743689069 | 0,07  | 0,856569593 | 0,04  | 0,955499131 |
| Gm10306 | 0     | 0,996998625 | 0,15  | 0,761560013 | -0,03 | 0,976522658 | 0,08  | 0,864728635 | 0,06  | 0,953297732 |
| Gm10308 | -0,02 | 0,989017567 | 0,31  | 0,49125334  | -0,1  | 0,915321116 | -0,25 | 0,525409031 | -0,17 | 0,817563348 |
| Gm10309 | -0,17 | 0,800851935 | -0,12 | 0,806456132 | -0,36 | 0,611372326 | -0,31 | 0,405379119 | -0,89 | 0,32285712  |
| Gm10318 | 0,18  | 0,795659022 | 0,15  | 0,840864779 | -0,12 | 0,864294595 | -0,07 | 0,88524189  | 0,22  | 0,820657685 |
| Gm10319 | -0,13 | 0,829299665 | 0,13  | 0,867324954 | -0,04 | 0,952518202 | -0,23 | 0,45119418  | -0,06 | 0,939448119 |
| Gm10322 | 0,08  | 0,891309235 | 0,08  | 0,855632384 | -0,11 | 0,881924837 | 0,04  | 0,93827162  | 0,13  | 0,865258929 |
| Gm10324 | 0,26  | 0,71867247  | 0     | 0,999210601 | -0,11 | 0,890842571 | 0,35  | 0,340577298 | 0,13  | 0,940774655 |
| Gm10325 | 0,3   | 0,734271791 | -0,2  | 0,664787536 | -0,36 | 0,584107565 | 0,02  | 0,988205241 | -0,08 | 0,96047099  |
| Gm10330 | -0,11 | 0,857585372 | 0,41  | 0,608466494 | 0,05  | 0,941627748 | 0,26  | 0,643335664 | 0,13  | 0,843351909 |
| Gm10334 | 0,42  | 0,684796553 | 0,59  | 0,17827498  | -0,22 | 0,867543859 | -0,25 | 0,510236478 | -0,39 | 0,563077271 |
| Gm10344 | 0,03  | 0,966775766 | 0     | 1           | -0,14 | 0,873457545 | 0,2   | 0,699906369 | -0,34 | 0,657070737 |
| Gm10353 | 0,27  | 0,518267881 | 0,52  | 0,565456041 | 0,02  | 0,983917018 | -0,07 | 0,919263182 | 0,7   | 0,220768726 |
| Gm10354 | 0,32  | 0,71099824  | 0,22  | 0,673542391 | -0,74 | 0,412239846 | -0,32 | 0,60270029  | -0,09 | 0,949544475 |
| Gm10367 | 0,28  | 0,551155038 | -0,1  | 0,842793123 | -0,26 | 0,707035755 | -0,08 | 0,832383062 | -0,06 | 0,933759514 |
| Gm10369 | 0,47  | 0,521669024 | -0,07 | 0,900782278 | -0,06 | 0,950846671 | -1,14 | 0,295360318 | -1,23 | 0,17837312  |
| Gm10371 | -0,26 | 0,762165257 | 0,22  | 0,750378621 | 0     | 0,997581017 | 0,38  | 0,434837088 | 0,66  | 0,375162254 |
| Gm10373 | 0,37  | 0,624961842 | 0,31  | 0,59780175  | -0,09 | 0,911506558 | -0,01 | 0,987229847 | -0,21 | 0,814438115 |
| Gm10375 | -0,1  | 0,9174562   | -0,12 | 0,915434803 | 0,18  | 0,777417583 | 0,08  | 0,919313613 | -0,01 | 0,994270272 |
| Gm10382 | 0,01  | 0,994117089 | -0,32 | 0,593605226 | 0,03  | 0,971479752 | 0,33  | 0,397361621 | 0,31  | 0,651895091 |
| Gm10384 | 0,29  | 0,509815996 | 0,17  | 0,808498635 | 0,12  | 0,856046789 | 0,03  | 0,969377207 | 0,15  | 0,885919236 |
| Gm10387 | 0,72  | 0,355118268 | 0,28  | 0,833868618 | -0,06 | 0,957114647 | -0,29 | 0,652007823 | 0,2   | 0,846205023 |
| Gm10388 | 0,57  | 0,24508813  | 0,6   | 0,49125334  | -0,62 | 0,342313446 | 0,08  | 0,88017942  | 0,7   | 0,421255613 |
| Gm10389 | -0,06 | 0,94902211  | 0,07  | 0,952692737 | 0,24  | 0,704014086 | 0,05  | 0,920716718 | -0,36 | 0,712793529 |
| Gm10390 | -0,07 | 0,914090929 | 0,02  | 0,976583732 | -0,12 | 0,882540073 | 0,06  | 0,949239972 | 0,07  | 0,956610289 |
| Gm10392 | 0,05  | 0,971245076 | -0,13 | 0,86695983  | 0,05  | 0,939885989 | -0,1  | 0,871488719 | 0,14  | 0,838281362 |
| Gm10398 | -0,31 | 0,617280733 | -0,03 | 0,975959817 | 0,17  | 0,856046789 | 0,12  | 0,927735789 | 0,29  | 0,806649799 |
| Gm10399 | -0,23 | 0,567855902 | 0,2   | 0,694017753 | 0,01  | 0,987390039 | -0,32 | 0,739149218 | -0,29 | 0,765327693 |

|         |       |             |       |             |       |             |       |             |       |             |
|---------|-------|-------------|-------|-------------|-------|-------------|-------|-------------|-------|-------------|
| Gm10400 | 0,25  | 0,702902826 | -0,08 | 0,869927431 | -0,13 | 0,807727786 | -0,01 | 0,988205241 | 0,53  | 0,32673984  |
| Gm10406 | 1,02  | 0,055054676 | 0,94  | 0,087435995 | -1,35 | 0,059939274 | 1,76  | 0,025699992 | 0,1   | 0,925451338 |
| Gm10415 | 0     | 0,999156748 | 0,04  | 0,959685428 | -0,04 | 0,949912807 | 0,05  | 0,932512513 | -0,14 | 0,863496792 |
| Gm10416 | -0,09 | 0,84377795  | 0,11  | 0,82485467  | 0,1   | 0,878365741 | -0,7  | 0,250567814 | -0,34 | 0,765809384 |
| Gm10417 | 0,02  | 0,97042066  | -0,16 | 0,899496232 | -0,54 | 0,302861841 | -0,14 | 0,75887854  | 0,15  | 0,872242794 |
| Gm10419 | 0,08  | 0,94271511  | 0,08  | 0,978341611 | -0,12 | 0,922318683 | -0,49 | 0,481666733 | 0,4   | 0,690741737 |
| Gm10421 | -0,11 | 0,841584453 | 0,03  | 0,979551751 | -0,01 | 0,990836784 | -0,12 | 0,78493052  | -0,06 | 0,950267521 |
| Gm10425 | -0,03 | 0,96153339  | -0,12 | 0,867265251 | 0,07  | 0,921956183 | 0,15  | 0,682921162 | 0,27  | 0,620579898 |
| Gm10428 | 0,25  | 0,568473441 | 0,42  | 0,300191093 | -0,16 | 0,798047198 | 0,15  | 0,678266102 | 0,01  | 0,989190533 |
| Gm1043  | 0,26  | 0,802806036 | 0,13  | 0,923044405 | -0,15 | 0,861877024 | 0,09  | 0,906288885 | -0,07 | 0,947212444 |
| Gm10432 | 0,29  | 0,584287872 | 0,12  | 0,906234611 | 0,18  | 0,834017354 | -0,39 | 0,665933714 | -0,19 | 0,87645265  |
| Gm10433 | -0,07 | 0,955554381 | 0,18  | 0,711176844 | -0,1  | 0,904057901 | 0,04  | 0,94180692  | 0,06  | 0,953585538 |
| Gm10435 | 0,09  | 0,87094817  | -0,28 | 0,535948571 | -0,21 | 0,712697139 | -0,21 | 0,756742248 | -0,3  | 0,720844381 |
| Gm10436 | -0,06 | 0,948926586 | -0,21 | 0,880892852 | 0,02  | 0,979788785 | -0,36 | 0,606812118 | -0,67 | 0,329284951 |
| Gm10439 | 0,12  | 0,891535966 | 0,68  | 0,501438027 | -0,27 | 0,772397144 | -0,4  | 0,424167291 | 0,47  | 0,435143061 |
| Gm10440 | -0,04 | 0,964154899 | -0,1  | 0,852828666 | -0,2  | 0,715497532 | 0,04  | 0,96648085  | 0,32  | 0,759648741 |
| Gm10445 | -0,15 | 0,814444163 | -0,15 | 0,804576975 | -0,21 | 0,76031147  | 0,03  | 0,965983604 | 0,18  | 0,755478611 |
| Gm10447 | -0,07 | 0,917014629 | 0,39  | 0,680007285 | -0,14 | 0,858393835 | -0,25 | 0,53858366  | -0,28 | 0,646919634 |
| Gm1045  | 0,05  | 0,954648978 | 0,19  | 0,852719676 | 0,5   | 0,443039118 | 0,07  | 0,94307532  | 0,28  | 0,805875294 |
| Gm10451 | 0,08  | 0,902351728 | 0,01  | 0,996865461 | -0,44 | 0,35354367  | 0,31  | 0,758588473 | 0,09  | 0,948163009 |
| Gm10463 | -0,17 | 0,883923631 | 0,28  | 0,609361686 | 0,41  | 0,617943722 | -0,4  | 0,220100451 | -0,21 | 0,751381706 |
| Gm10465 | -0,02 | 0,970875252 | 0,02  | 0,983071427 | 0,03  | 0,969570532 | 0     | 1           | 0,03  | 0,973333131 |
| Gm10466 | 0,13  | 0,816465857 | 0,08  | 0,952352299 | -0,2  | 0,770526999 | 0,35  | 0,602518557 | 0,15  | 0,86408757  |
| Gm10471 | 0,07  | 0,922118639 | 0,07  | 0,941811651 | -0,3  | 0,612239485 | -0,19 | 0,817794705 | -0,02 | 0,988369133 |
| Gm10472 | -0,01 | 0,990162934 | -0,14 | 0,763005394 | 0,04  | 0,950846671 | 0,24  | 0,556686933 | 0,22  | 0,758582607 |
| Gm10475 | -0,14 | 0,814444163 | 0,23  | 0,810875398 | -0,11 | 0,855603878 | -0,18 | 0,751009777 | 0,05  | 0,943463914 |
| Gm10477 | -0,05 | 0,922398216 | 0,03  | 0,956049982 | 0,13  | 0,809137779 | -0,15 | 0,680951303 | 0,05  | 0,953012603 |
| Gm10482 | 0,06  | 0,904019418 | -0,05 | 0,919475021 | -0,05 | 0,950862176 | 0,31  | 0,606873358 | -0,12 | 0,917356423 |
| Gm10483 | -0,07 | 0,902351728 | 0,02  | 0,965907062 | -0,02 | 0,986406216 | -0,07 | 0,869424232 | 0,03  | 0,978972169 |
| Gm10489 | 0,21  | 0,58968537  | -0,19 | 0,700831651 | -0,2  | 0,769525299 | -0,1  | 0,846021694 | 0,22  | 0,739851808 |
| Gm10490 | -0,1  | 0,925283862 | -1,49 | 0,114783164 | 0,01  | 0,995662132 | 1,44  | 0,011555935 | 0,91  | 0,349150128 |
| Gm10493 | 0,03  | 0,950531388 | 0,04  | 0,9381453   | -0,12 | 0,830685724 | 0,01  | 0,976746541 | 0,01  | 0,985269236 |
| Gm10494 | -0,03 | 0,957961442 | 0     | 0,999017633 | 0,11  | 0,862869965 | 0,07  | 0,86665309  | 0,15  | 0,85508146  |
| Gm10499 | 0,49  | 0,298948972 | 0,43  | 0,416922779 | -0,83 | 0,040688367 | 0,06  | 0,883626339 | 0,66  | 0,169684576 |
| Gm10501 | 0,14  | 0,867243066 | 0,22  | 0,696329013 | -0,35 | 0,704406191 | -0,36 | 0,521381524 | 0,33  | 0,642782255 |

|         |       |             |       |             |       |             |       |             |       |             |
|---------|-------|-------------|-------|-------------|-------|-------------|-------|-------------|-------|-------------|
| Gm10503 | 0,05  | 0,94881239  | -0,11 | 0,876459111 | -0,24 | 0,751758339 | 0,45  | 0,325265273 | 0,32  | 0,61355523  |
| Gm10505 | -0,06 | 0,907748757 | 0     | 1           | -0,03 | 0,961297323 | -0,02 | 0,969986239 | 0,15  | 0,829380863 |
| Gm10509 | -0,11 | 0,867664049 | -0,25 | 0,721275133 | 0,02  | 0,984012382 | -0,13 | 0,815317622 | 0,67  | 0,211018037 |
| Gm10510 | 0,03  | 0,94815841  | -0,33 | 0,732044571 | -0,01 | 0,993379272 | 0,09  | 0,851411172 | 0,05  | 0,957993472 |
| Gm10512 | -0,24 | 0,596655034 | -0,09 | 0,9208542   | 0,04  | 0,956894731 | -0,01 | 0,984219712 | -0,08 | 0,929127539 |
| Gm10516 | -0,36 | 0,525882765 | 0,12  | 0,840068407 | 0,56  | 0,393731143 | -0,2  | 0,633092233 | 0,04  | 0,95985938  |
| Gm10517 | -0,11 | 0,804389305 | 0,22  | 0,641792237 | -0,47 | 0,396793877 | -0,11 | 0,773990463 | 0,19  | 0,754511071 |
| Gm10518 | 0,22  | 0,661376707 | 0,04  | 0,954295809 | -0,04 | 0,961464515 | 0,16  | 0,637350063 | 0,08  | 0,911685487 |
| Gm10521 | 0,34  | 0,39231917  | -0,1  | 0,854940418 | -0,24 | 0,714786226 | -0,01 | 0,985627977 | -0,02 | 0,983617617 |
| Gm10524 | -0,2  | 0,666297306 | 0     | 1           | -0,09 | 0,898005346 | -0,18 | 0,765887358 | -0,34 | 0,497190175 |
| Gm10530 | -0,12 | 0,7830424   | 0,14  | 0,839636434 | -0,14 | 0,81820534  | 0,14  | 0,825979396 | 0,14  | 0,914498972 |
| Gm10532 | 0,04  | 0,955394263 | -0,14 | 0,880473303 | -0,18 | 0,786976094 | 0,18  | 0,659707323 | 0     | 0,997299415 |
| Gm10535 | 0,03  | 0,966775766 | 0,2   | 0,725431195 | 0,04  | 0,955820582 | 0,15  | 0,716055856 | 0,1   | 0,916173996 |
| Gm10536 | 0,14  | 0,839375532 | -0,04 | 0,932292974 | -0,02 | 0,977897176 | -0,06 | 0,885417869 | -0,16 | 0,818348287 |
| Gm10538 | -0,26 | 0,642047563 | -0,09 | 0,863054031 | -0,22 | 0,73501607  | 0,02  | 0,988205241 | 0,11  | 0,876059628 |
| Gm10544 | -0,43 | 0,266230034 | -0,14 | 0,859954464 | -0,06 | 0,947881687 | 0     | 0,999809258 | -0,08 | 0,948835084 |
| Gm10545 | 0,35  | 0,469049834 | 0,01  | 0,996259587 | -0,23 | 0,69542952  | -0,19 | 0,571537492 | -0,03 | 0,973428839 |
| Gm10548 | -0,06 | 0,947630317 | -0,09 | 0,891099    | 0,11  | 0,895520077 | 0,09  | 0,852596465 | -0,42 | 0,587305934 |
| Gm10549 | 0,24  | 0,580117138 | -0,12 | 0,842793123 | -0,39 | 0,603802059 | -0,14 | 0,707902199 | -0,09 | 0,937446198 |
| Gm10554 | -0,18 | 0,731173847 | 0     | 1           | 0,03  | 0,963221639 | -0,54 | 0,450863683 | -0,35 | 0,749887358 |
| Gm10555 | 0     | 0,994883841 | 0,01  | 0,985413376 | -0,01 | 0,993686224 | -0,01 | 0,979035899 | 0     | 0,99476381  |
| Gm10556 | 0,53  | 0,503391363 | 0,02  | 0,993068441 | 0,36  | 0,747599709 | 0,06  | 0,921731995 | 0,26  | 0,697757911 |
| Gm10558 | 0,01  | 0,993175772 | 0,28  | 0,636812294 | 0,04  | 0,963578796 | 0,06  | 0,89150663  | -0,4  | 0,456564217 |
| Gm10560 | -0,49 | 0,537328866 | 0,65  | 0,52481898  | 0,48  | 0,675157301 | -0,48 | 0,571739259 | 0,72  | 0,623037145 |
| Gm10561 | 0,15  | 0,925148331 | -0,86 | 0,31069547  | 0,66  | 0,740346788 | 1,08  | 0,284374871 | -0,05 | 0,983300881 |
| Gm10568 | -0,33 | 0,40470849  | 0,07  | 0,882847123 | -0,07 | 0,900287506 | 0,02  | 0,957573971 | 0,31  | 0,581802025 |
| Gm10570 | 0     | 0,999010996 | -0,1  | 0,863823062 | -0,24 | 0,661747229 | 0,2   | 0,652810109 | -0,03 | 0,97872616  |
| Gm10572 | -0,07 | 0,877498793 | 0,02  | 0,966717367 | -0,02 | 0,983471086 | -0,37 | 0,514446    | -0,35 | 0,661300566 |
| Gm10573 | 0,34  | 0,302006612 | 0     | 1           | -0,19 | 0,753584137 | -0,14 | 0,71050512  | -0,16 | 0,821727352 |
| Gm10575 | -0,06 | 0,937251448 | 0,19  | 0,803071242 | 0,12  | 0,908400411 | -0,16 | 0,810252407 | -0,11 | 0,876747929 |
| Gm10576 | 0,24  | 0,533055802 | 0,09  | 0,83389171  | -0,27 | 0,665094542 | -0,31 | 0,501971846 | -0,27 | 0,750504485 |
| Gm10577 | 0,12  | 0,778869381 | -0,1  | 0,837500541 | -0,07 | 0,920128463 | -0,11 | 0,776545078 | -0,2  | 0,726042963 |
| Gm10578 | 0,23  | 0,739833092 | 0,08  | 0,941258271 | -0,18 | 0,864292935 | 0,28  | 0,45580171  | 0,23  | 0,78960943  |
| Gm10579 | 0,12  | 0,778869381 | 0     | 1           | 0,13  | 0,809051989 | 0,14  | 0,723413618 | 0,33  | 0,590396118 |
| Gm10584 | 0,03  | 0,963914207 | -0,16 | 0,747707816 | -0,39 | 0,709317317 | 0,12  | 0,749306304 | -0,1  | 0,919867638 |



|         |       |             |       |             |       |             |       |             |       |             |
|---------|-------|-------------|-------|-------------|-------|-------------|-------|-------------|-------|-------------|
| Gm10589 | 0,26  | 0,757251078 | 0,8   | 0,313668241 | -0,29 | 0,839669459 | -1,9  | 0,00932284  | 0,82  | 0,318985547 |
| Gm10590 | 0,05  | 0,925333314 | 0,12  | 0,807100558 | 0,18  | 0,830507475 | -0,07 | 0,879612976 | 0,15  | 0,930287169 |
| Gm10604 | -0,1  | 0,867025523 | -0,5  | 0,601390176 | -0,04 | 0,963357998 | 0,3   | 0,351646843 | 0,22  | 0,736245226 |
| Gm10610 | 0,01  | 0,98297164  | 0,06  | 0,905740443 | -0,07 | 0,916403684 | -0,18 | 0,694362194 | -0,19 | 0,807725933 |
| Gm10612 | -0,08 | 0,927460107 | 0,38  | 0,590722193 | -0,57 | 0,442044082 | -0,11 | 0,818693228 | -0,27 | 0,735152891 |
| Gm10614 | 0,13  | 0,815219917 | -0,15 | 0,740618526 | -0,23 | 0,702541777 | 0,27  | 0,560223278 | -0,24 | 0,720742956 |
| Gm10615 | 0,05  | 0,94811645  | -0,61 | 0,661304553 | -0,09 | 0,969035931 | -0,11 | 0,850069699 | -0,08 | 0,964200654 |
| Gm10616 | 0,02  | 0,974267399 | 0,07  | 0,882931058 | -0,23 | 0,675235188 | 0     | 1           | 0,19  | 0,805797585 |
| Gm10617 | 0,12  | 0,761457464 | 0,08  | 0,856966527 | -0,35 | 0,498063282 | -0,05 | 0,90264563  | -0,04 | 0,956610289 |
| Gm10619 | 0,18  | 0,741490814 | -0,58 | 0,19876663  | -0,03 | 0,97217685  | -0,03 | 0,965653854 | -0,04 | 0,975200543 |
| Gm10624 | -0,05 | 0,91366065  | -0,02 | 0,97875059  | 0,01  | 0,993379272 | 0,13  | 0,757267334 | -0,13 | 0,865258929 |
| Gm10629 | 0,05  | 0,939743729 | 0,1   | 0,83754738  | -0,42 | 0,541560473 | 0     | 1           | 0,1   | 0,885872093 |
| Gm10631 | 0,33  | 0,450482208 | 0,14  | 0,802979985 | -0,19 | 0,712697139 | 0,34  | 0,357921164 | 0,11  | 0,89204841  |
| Gm10635 | 0,28  | 0,511545589 | 0,32  | 0,677044878 | -0,28 | 0,56811172  | 0,23  | 0,708767929 | 0,27  | 0,752420653 |
| Gm10636 | 0,04  | 0,96097593  | -0,04 | 0,969296652 | -0,52 | 0,36401558  | 0,18  | 0,831660272 | 0,1   | 0,909177642 |
| Gm10637 | -0,06 | 0,955274506 | 0,04  | 0,987282412 | 0,25  | 0,729031049 | 0,26  | 0,81044145  | 0,38  | 0,736140152 |
| Gm10638 | -0,48 | 0,597618709 | 0,33  | 0,574343122 | 0,3   | 0,798711591 | 0,18  | 0,884352208 | 0,26  | 0,783412747 |
| Gm10639 | 0,6   | 0,312868628 | 0,53  | 0,689957982 | -0,19 | 0,8290371   | -0,75 | 0,437001704 | 0,45  | 0,643382128 |
| Gm10640 | -0,36 | 0,613990129 | -1,21 | 0,18376765  | -0,26 | 0,729031049 | 0,88  | 0,048295711 | 0,38  | 0,60760438  |
| Gm10642 | -0,4  | 0,329774627 | -0,37 | 0,642545139 | 0,34  | 0,716261194 | 0,37  | 0,415968391 | -0,05 | 0,953971867 |
| Gm10643 | 0,17  | 0,839824168 | -0,2  | 0,837071004 | -0,07 | 0,940620486 | -0,74 | 0,074520984 | -0,1  | 0,940438527 |
| Gm10644 | -0,13 | 0,821721324 | 0,51  | 0,694233866 | -0,08 | 0,948066182 | -0,65 | 0,376693382 | -0,5  | 0,555858496 |
| Gm10645 | -0,88 | 0,422775151 | 0,84  | 0,217093794 | -0,57 | 0,720069267 | -0,3  | 0,479018218 | -0,66 | 0,393051565 |
| Gm10647 | 0,15  | 0,813304253 | -0,16 | 0,863064855 | -0,14 | 0,915407865 | 0,07  | 0,940891309 | 0,25  | 0,880054033 |
| Gm10648 | 0,32  | 0,451358876 | -0,15 | 0,904258936 | -0,57 | 0,382042571 | 0,31  | 0,623313665 | -0,22 | 0,755637142 |
| Gm10649 | 0,01  | 0,98456417  | 0,15  | 0,781046971 | -0,01 | 0,989491273 | -0,01 | 0,979212436 | -0,02 | 0,982816728 |
| Gm10650 | 0,16  | 0,834609407 | -0,07 | 0,902532927 | -0,47 | 0,382386692 | -0,18 | 0,767081473 | -0,24 | 0,719609866 |
| Gm10652 | 0,18  | 0,751534367 | 0,13  | 0,785244931 | -0,05 | 0,95204022  | 0     | 1           | -0,05 | 0,947559952 |
| Gm10653 | -0,29 | 0,571404655 | 0,23  | 0,881595712 | -0,1  | 0,897932497 | 0,21  | 0,712190326 | 0,37  | 0,642726581 |
| Gm10654 | 0,04  | 0,958512892 | 0,37  | 0,388579184 | -0,08 | 0,937546889 | -0,02 | 0,974719456 | 0,04  | 0,979420282 |
| Gm10655 | -0,25 | 0,785491059 | 0,41  | 0,490194454 | -0,14 | 0,879141223 | -0,06 | 0,893185948 | 0,5   | 0,452989679 |
| Gm10657 | 0,25  | 0,68223979  | -0,29 | 0,589051408 | -0,32 | 0,688278515 | 0,72  | 0,169997936 | 0     | 0,99564566  |
| Gm10658 | 0,18  | 0,895682399 | 0,23  | 0,693906911 | -0,25 | 0,838592669 | -0,97 | 0,285826337 | -0,43 | 0,676404522 |
| Gm10667 | 0,18  | 0,66331039  | -0,02 | 0,970020205 | 0,01  | 0,986912078 | 0,03  | 0,948141338 | -0,21 | 0,726042963 |
| Gm10676 | -0,21 | 0,722415783 | 0,35  | 0,657429109 | -0,08 | 0,943934563 | 0,12  | 0,845259266 | -0,29 | 0,823098095 |

|         |       |             |       |             |       |             |       |             |       |             |
|---------|-------|-------------|-------|-------------|-------|-------------|-------|-------------|-------|-------------|
| Gm10677 | -0,3  | 0,648730873 | -0,03 | 0,959545753 | 0,22  | 0,678468552 | 0,79  | 0,226286594 | 0,12  | 0,937558003 |
| Gm10680 | 0,24  | 0,559563033 | 0,06  | 0,927804354 | 0,17  | 0,751758339 | 0,07  | 0,869234665 | -0,04 | 0,964566958 |
| Gm10684 | 0,05  | 0,944291635 | 0,63  | 0,411059412 | -0,32 | 0,445150751 | -0,08 | 0,881829784 | -0,11 | 0,898309858 |
| Gm10685 | 0,32  | 0,59648949  | 0     | 1           | -0,31 | 0,628978443 | 0,13  | 0,780045105 | 0,23  | 0,640333106 |
| Gm10687 | -0,11 | 0,900340189 | 0,12  | 0,916255958 | 0,5   | 0,528008802 | 0,42  | 0,40199632  | -0,84 | 0,251771039 |
| Gm10688 | 0,12  | 0,773475811 | 0,14  | 0,815022365 | -0,03 | 0,97209334  | -0,47 | 0,494681557 | -0,52 | 0,552128538 |
| Gm10690 | 0     | 1           | 0,12  | 0,782712411 | 0,06  | 0,926974012 | -0,05 | 0,896599656 | -0,23 | 0,702993783 |
| Gm10693 | 0,34  | 0,572652085 | 0,02  | 0,995605655 | 0,03  | 0,982305856 | 0,14  | 0,920036779 | 0,01  | 0,993413582 |
| Gm10696 | 0,04  | 0,95491769  | 0,34  | 0,384803204 | -0,19 | 0,821229302 | -0,03 | 0,968528505 | 0     | 0,997782491 |
| Gm10699 | -0,16 | 0,760032001 | 0     | 0,997289115 | -0,32 | 0,548190257 | -0,03 | 0,950962367 | -0,07 | 0,927536545 |
| Gm1070  | -0,31 | 0,617280733 | 0,55  | 0,745130453 | 0,04  | 0,967127816 | -0,57 | 0,418317818 | -0,5  | 0,504873143 |
| Gm10700 | 0,07  | 0,886068609 | -0,17 | 0,729172466 | 0,25  | 0,560376292 | 0,05  | 0,903739255 | -0,23 | 0,706246121 |
| Gm10701 | 0,19  | 0,705284533 | -0,31 | 0,642169508 | -0,18 | 0,74218826  | 0,15  | 0,740212094 | 0,2   | 0,823191628 |
| Gm10706 | -0,64 | 0,348729432 | 0,06  | 0,956670485 | 0     | 0,997394645 | -0,39 | 0,555605683 | 0,03  | 0,989179767 |
| Gm10710 | -0,07 | 0,897455401 | -0,17 | 0,861905894 | -0,52 | 0,614757107 | -0,13 | 0,920589831 | -0,1  | 0,950048707 |
| Gm10714 | 0,19  | 0,80011956  | 0,07  | 0,958856577 | -0,08 | 0,909975745 | -0,19 | 0,665208114 | 0,02  | 0,985269236 |
| Gm10723 | 0,09  | 0,841086941 | 0,01  | 0,996113371 | 0     | 0,998479656 | 0,03  | 0,936218995 | 0,17  | 0,822894226 |
| Gm10724 | -0,03 | 0,965764777 | 0,02  | 0,982332924 | -0,46 | 0,408971158 | -0,34 | 0,71158821  | -0,25 | 0,801720063 |
| Gm10729 | 0,02  | 0,974740074 | -0,3  | 0,662134711 | 0,02  | 0,981188621 | 0,16  | 0,759281029 | -0,36 | 0,769108125 |
| Gm10731 | 0,03  | 0,972112267 | -0,43 | 0,361406029 | -0,14 | 0,860923344 | 0,33  | 0,35953164  | 0,09  | 0,923816228 |
| Gm10733 | 0,07  | 0,882943798 | -0,01 | 0,992175086 | 0,01  | 0,992344423 | 0     | 1           | 0,06  | 0,951844865 |
| Gm10734 | -0,14 | 0,744446447 | 0,07  | 0,932292974 | 0,16  | 0,83442082  | 0,56  | 0,355192038 | -0,06 | 0,969928296 |
| Gm10735 | -0,18 | 0,791021845 | -0,17 | 0,844425286 | -0,22 | 0,738922327 | 0,08  | 0,941640929 | -0,06 | 0,959573673 |
| Gm10742 | 0,17  | 0,802334341 | 0,05  | 0,96497149  | 0,29  | 0,563934293 | -0,14 | 0,703913685 | 0,08  | 0,952296554 |
| Gm10743 | 0,15  | 0,816465857 | -0,72 | 0,459417799 | 0,35  | 0,628466764 | 0,83  | 0,053429531 | 0,3   | 0,699060093 |
| Gm10744 | 0,14  | 0,751890284 | 0     | 1           | -0,28 | 0,545465016 | 0,03  | 0,942032046 | 0,29  | 0,587440076 |
| Gm10745 | 0,4   | 0,278121865 | -0,11 | 0,873628464 | -0,11 | 0,875486206 | -0,2  | 0,713260063 | -0,11 | 0,920748161 |
| Gm10747 | 0,08  | 0,867243066 | 0     | 0,998237793 | -0,14 | 0,826840894 | 0,04  | 0,928002892 | 0,08  | 0,924271573 |
| Gm10748 | 0,39  | 0,369418071 | 0,12  | 0,820137069 | 0,08  | 0,90672161  | 0,04  | 0,943864463 | 0,24  | 0,812229801 |
| Gm10750 | 0,09  | 0,859044359 | -0,06 | 0,891533665 | 0,08  | 0,920828015 | 0,24  | 0,620521302 | -0,11 | 0,890957032 |
| Gm10752 | -0,14 | 0,769138738 | 0,11  | 0,837489456 | 0,08  | 0,905838194 | -0,18 | 0,627089222 | 0,15  | 0,80618429  |
| Gm10754 | 0,07  | 0,938388549 | -0,16 | 0,884434898 | -0,46 | 0,333516073 | 0,25  | 0,534925304 | 0,05  | 0,951471487 |
| Gm10757 | 0,08  | 0,843046001 | 0,12  | 0,792112243 | -0,02 | 0,979585868 | -0,04 | 0,941483354 | 0,11  | 0,89204841  |
| Gm10760 | -0,11 | 0,796967364 | -0,03 | 0,95775423  | -0,19 | 0,730533593 | -0,04 | 0,926317009 | 0,17  | 0,830086988 |
| Gm10764 | 0,3   | 0,487571132 | 0,16  | 0,77325041  | -0,3  | 0,648363695 | 0,07  | 0,903739255 | 0,3   | 0,602622607 |

|         |       |             |       |             |       |             |       |             |       |             |
|---------|-------|-------------|-------|-------------|-------|-------------|-------|-------------|-------|-------------|
| Gm10765 | 0,15  | 0,702931775 | 0,12  | 0,849913233 | 0,03  | 0,963199274 | -0,15 | 0,767937787 | -0,1  | 0,904636459 |
| Gm10767 | 0,05  | 0,965991176 | 0,04  | 0,970832543 | 0,38  | 0,607473016 | -0,37 | 0,808019987 | -0,42 | 0,830086988 |
| Gm10768 | 0,01  | 0,995017356 | -0,23 | 0,794404033 | 0,27  | 0,598179126 | 0,29  | 0,460330117 | 0,83  | 0,454779935 |
| Gm10775 | 0,19  | 0,66961506  | 0,11  | 0,820427793 | -0,04 | 0,973687736 | 0,17  | 0,776216317 | 0,1   | 0,914498972 |
| Gm10778 | -0,71 | 0,642618049 | -0,91 | 0,184037064 | -0,23 | 0,889244633 | -0,44 | 0,468546081 | 0,38  | 0,835180315 |
| Gm10782 | -0,19 | 0,712165686 | -0,28 | 0,494858163 | -0,19 | 0,746570045 | 0,02  | 0,967047406 | 0,17  | 0,771772186 |
| Gm10785 | -0,24 | 0,820023436 | -0,25 | 0,855187815 | 0,31  | 0,62535327  | 0     | 1           | -0,08 | 0,959398085 |
| Gm10787 | 0,19  | 0,70453516  | 0,1   | 0,8910846   | -0,17 | 0,841942589 | 0,07  | 0,895221658 | -0,03 | 0,979152939 |
| Gm10789 | -0,05 | 0,922425212 | -0,06 | 0,934294134 | -0,14 | 0,834017354 | 0,03  | 0,943143586 | -0,24 | 0,6754671   |
| Gm10790 | 0,2   | 0,79498488  | 0,07  | 0,956935029 | 0,14  | 0,911506558 | 0,55  | 0,363397218 | 0,51  | 0,66411916  |
| Gm10791 | 1,21  | 0,156158686 | 1,04  | 0,205273528 | -1,27 | 0,198762674 | -0,02 | 0,991948128 | 0,66  | 0,4940585   |
| Gm10797 | -0,14 | 0,882500171 | -0,12 | 0,880107273 | 0,13  | 0,82162081  | 0,33  | 0,439760247 | -0,07 | 0,947257822 |
| Gm10803 | 0,21  | 0,559563033 | 0,04  | 0,965147491 | -0,03 | 0,982305856 | 0,04  | 0,94808714  | -0,11 | 0,878966527 |
| Gm10804 | 0,47  | 0,432091361 | 0,49  | 0,559743815 | 0,04  | 0,959376967 | 0,19  | 0,689625845 | 0,46  | 0,665051452 |
| Gm10808 | 0,08  | 0,876138432 | 0,09  | 0,841184864 | 0,08  | 0,914134206 | -1,03 | 0,066935845 | 0,19  | 0,874936414 |
| Gm10814 | 0,07  | 0,903817676 | 0,25  | 0,671319666 | -0,07 | 0,955303601 | 0,04  | 0,970931237 | 0,45  | 0,550083777 |
| Gm10815 | 0,04  | 0,944291635 | -0,03 | 0,952352299 | 0,09  | 0,872333096 | -0,08 | 0,85447054  | -0,02 | 0,983617617 |
| Gm10822 | 0,15  | 0,707070061 | 0,11  | 0,913619068 | 0,04  | 0,975226515 | -0,07 | 0,866142347 | -0,23 | 0,726042963 |
| Gm10823 | 0,01  | 0,99456044  | -0,38 | 0,649104789 | 0,1   | 0,922318683 | -0,26 | 0,784479261 | -0,31 | 0,864004866 |
| Gm10824 | 0,01  | 0,993728727 | 0,14  | 0,771641267 | 0,08  | 0,91344763  | 0     | 0,993337409 | 0,09  | 0,900126162 |
| Gm10825 | -0,48 | 0,558777379 | -0,14 | 0,882918801 | 0,25  | 0,702928613 | 0,8   | 0,167912675 | 0,01  | 0,992997824 |
| Gm10826 | 0,02  | 0,976017769 | 0     | 1           | -0,14 | 0,82104737  | 0,06  | 0,896599656 | 0,08  | 0,916410813 |
| Gm10827 | -0,01 | 0,986216037 | -0,04 | 0,956504634 | -0,06 | 0,946845275 | -0,06 | 0,915119168 | 0,17  | 0,824627557 |
| Gm10829 | 0,08  | 0,865776054 | -0,07 | 0,882931058 | -0,05 | 0,950846671 | 0,1   | 0,798674602 | -0,01 | 0,984847718 |
| Gm10837 | 0,18  | 0,722844331 | 0,02  | 0,977204386 | 0,05  | 0,94930407  | -0,21 | 0,714814802 | -0,09 | 0,895579031 |
| Gm10838 | 0,17  | 0,757032046 | -0,13 | 0,781665479 | 0,31  | 0,668690906 | -0,35 | 0,504114639 | -0,89 | 0,349150128 |
| Gm10839 | 0,02  | 0,979130815 | 0,12  | 0,80097084  | -0,14 | 0,863964732 | 0,08  | 0,87811903  | 0,03  | 0,976984951 |
| Gm10840 | 0,92  | 0,13473547  | 0,2   | 0,702991386 | -0,05 | 0,966359868 | -0,1  | 0,954183973 | -0,59 | 0,664512023 |
| Gm10842 | -0,2  | 0,757239936 | -0,01 | 0,986396264 | 0,13  | 0,8290371   | -0,07 | 0,866775923 | -0,1  | 0,928671864 |
| Gm10844 | 0,25  | 0,603330883 | 0,27  | 0,512624555 | 0     | 0,999571656 | -0,25 | 0,523262994 | 0,1   | 0,914176188 |
| Gm10845 | -0,22 | 0,697356307 | -0,18 | 0,765325717 | -0,36 | 0,518222477 | -0,14 | 0,866473348 | -0,48 | 0,446990293 |
| Gm10846 | 0,07  | 0,874467978 | 0     | 1           | -0,03 | 0,961329168 | 0,11  | 0,756094758 | 0,26  | 0,597080822 |
| Gm10847 | 0,23  | 0,66235833  | -0,02 | 0,995205602 | -0,28 | 0,570360359 | 0,26  | 0,465862951 | -0,19 | 0,745134899 |
| Gm10851 | 1,92  | 0,074890017 | 1,59  | 0,205273528 | -2,39 | 0,000552883 | 3,23  | 0,02040845  | 0,32  | 0,574931739 |
| Gm10852 | 0,11  | 0,816465857 | 0,09  | 0,897038013 | -0,25 | 0,652112262 | -0,17 | 0,783528833 | 0,05  | 0,96439553  |

|         |       |             |       |             |       |             |       |             |       |             |
|---------|-------|-------------|-------|-------------|-------|-------------|-------|-------------|-------|-------------|
| Gm10855 | -0,19 | 0,684674757 | -0,14 | 0,874195024 | 0,18  | 0,806102885 | -0,04 | 0,961963439 | -0,02 | 0,98653183  |
| Gm10856 | 0,2   | 0,702902826 | 0,29  | 0,470112519 | 0,15  | 0,814441474 | -0,32 | 0,484379328 | 0,05  | 0,96738578  |
| Gm10857 | 0,03  | 0,959683262 | 0,19  | 0,800591362 | -0,19 | 0,729592327 | -0,05 | 0,921310565 | 0,15  | 0,818378473 |
| Gm10858 | -0,3  | 0,708296676 | -0,04 | 0,954948291 | -0,54 | 0,368726841 | -0,12 | 0,759446803 | 0,12  | 0,900710858 |
| Gm10860 | -0,6  | 0,38767822  | 0,1   | 0,906201358 | -0,14 | 0,904057901 | -0,44 | 0,42144322  | 0,14  | 0,871939686 |
| Gm10862 | 0,22  | 0,668336109 | -0,09 | 0,854520972 | -0,32 | 0,491914817 | 0,06  | 0,889364462 | -0,05 | 0,947901649 |
| Gm10863 | -0,11 | 0,832773897 | 0,23  | 0,894205636 | 0,04  | 0,961386436 | -1,19 | 0,019419918 | 0,05  | 0,963675274 |
| Gm10864 | 0,17  | 0,781181609 | -0,02 | 0,984913759 | 0,02  | 0,977827235 | -0,02 | 0,980890499 | 0,1   | 0,890833196 |
| Gm10865 | 0,03  | 0,978153995 | 0,21  | 0,678357594 | -0,38 | 0,537671687 | 0,07  | 0,887362919 | 0,26  | 0,642685227 |
| Gm10866 | 0,05  | 0,907391935 | 0     | 0,999210601 | -0,06 | 0,918441706 | -0,03 | 0,93899315  | -0,01 | 0,987935971 |
| Gm10873 | 0,49  | 0,457905777 | 0,07  | 0,93341869  | -0,33 | 0,56948206  | 0,23  | 0,767176507 | 0,26  | 0,697336851 |
| Gm10874 | 0,15  | 0,876935395 | 0,38  | 0,35496087  | -0,17 | 0,783583806 | 0,02  | 0,972627967 | -0,03 | 0,980961333 |
| Gm10876 | 0,19  | 0,714491172 | 0,19  | 0,769551285 | -0,14 | 0,799586974 | -0,01 | 0,984136649 | 0,28  | 0,627973105 |
| Gm10912 | -0,19 | 0,720829271 | 0,09  | 0,95790527  | 0,04  | 0,97548193  | 0,45  | 0,191726739 | -0,04 | 0,972590168 |
| Gm10914 | 0,09  | 0,922118639 | 0,19  | 0,745130453 | 0,21  | 0,809137779 | 0,26  | 0,726953267 | -0,14 | 0,91314596  |
| Gm10922 | 0,63  | 0,644756656 | 0,36  | 0,653423189 | -0,26 | 0,856107139 | -1,38 | 0,055569548 | -1,08 | 0,214056891 |
| Gm10931 | 0,1   | 0,813460438 | 0,01  | 0,989873399 | -0,1  | 0,868590766 | -0,04 | 0,932289307 | 0,1   | 0,904040121 |
| Gm10933 | 0,4   | 0,434222592 | -1,06 | 0,141157706 | 0,06  | 0,94191438  | 0,94  | 0,38755577  | -0,18 | 0,951471487 |
| Gm10941 | -0,05 | 0,948926586 | -0,1  | 0,88741189  | 0,58  | 0,506787649 | 0,99  | 0,132361628 | 0,59  | 0,630497691 |
| Gm1096  | -0,19 | 0,761457464 | -0,17 | 0,8896058   | -0,32 | 0,481504499 | 0,11  | 0,911958998 | 0,1   | 0,932824449 |
| Gm10961 | 0,4   | 0,314465089 | 0,09  | 0,89081665  | -0,02 | 0,985347628 | -0,09 | 0,907350266 | 0,07  | 0,948759136 |
| Gm11020 | 0     | 1           | 0,06  | 0,883687585 | -0,03 | 0,975866042 | 0,03  | 0,970992013 | 0,2   | 0,803566512 |
| Gm1110  | 0     | 0,997893551 | -0,02 | 0,98859071  | -0,07 | 0,926263109 | -0,14 | 0,815182755 | -0,18 | 0,81469483  |
| Gm11100 | 0,25  | 0,617280733 | -0,2  | 0,80000598  | -0,17 | 0,779486228 | 0,23  | 0,523255995 | -0,07 | 0,935708361 |
| Gm11110 | -0,17 | 0,800851935 | 0,11  | 0,932292974 | 0,38  | 0,6348675   | 0     | 0,996714438 | 0,62  | 0,632781943 |
| Gm11127 | 0,19  | 0,805438081 | -0,11 | 0,899624796 | -0,16 | 0,750826735 | 0,32  | 0,599572973 | 0,2   | 0,829444633 |
| Gm11131 | 0,29  | 0,586458491 | 0,05  | 0,953198116 | -0,5  | 0,377624172 | 0,07  | 0,87630843  | 0,09  | 0,911034257 |
| Gm11149 | 0,38  | 0,580784638 | 0,07  | 0,934294134 | -0,18 | 0,762462025 | 0,09  | 0,87811903  | -0,5  | 0,630151021 |
| Gm11166 | 0,16  | 0,82985488  | -0,31 | 0,696329013 | -0,2  | 0,757498725 | 0,23  | 0,613098505 | -0,13 | 0,916204519 |
| Gm11175 | -0,9  | 0,357036798 | 0,24  | 0,839789639 | -0,07 | 0,964509282 | -0,19 | 0,84517253  | 0,55  | 0,462558109 |
| Gm11184 | 0,21  | 0,761457464 | -0,16 | 0,914586086 | -0,28 | 0,640613239 | -0,12 | 0,9130534   | -0,15 | 0,909363599 |
| Gm11186 | 0,16  | 0,805532266 | -0,01 | 0,998345861 | -0,14 | 0,8271738   | 0,04  | 0,920317721 | -0,06 | 0,958727726 |
| Gm11190 | 0,43  | 0,681371768 | -0,38 | 0,614233457 | 0,06  | 0,962216849 | 0,41  | 0,353716436 | 0,29  | 0,721664501 |
| Gm11201 | 0,09  | 0,886741208 | 0,03  | 0,986774681 | -0,01 | 0,990836784 | 0,13  | 0,835223942 | -0,14 | 0,881135847 |
| Gm11205 | -0,14 | 0,742790071 | 0,16  | 0,801257272 | 0,13  | 0,89402623  | -0,43 | 0,601675182 | -0,19 | 0,898550606 |

|         |       |             |       |             |       |             |       |             |       |             |
|---------|-------|-------------|-------|-------------|-------|-------------|-------|-------------|-------|-------------|
| Gm11211 | -0,2  | 0,792392579 | -0,08 | 0,926353869 | 0,1   | 0,885551089 | -0,02 | 0,965563926 | 0,14  | 0,828288883 |
| Gm11213 | -0,06 | 0,916217568 | 0,66  | 0,530750017 | -0,04 | 0,963199274 | 0,06  | 0,884352208 | 0     | 0,999010319 |
| Gm11217 | -0,01 | 0,990894139 | 0,34  | 0,693906911 | 0,27  | 0,661220717 | -0,13 | 0,857910103 | -0,07 | 0,950558345 |
| Gm11228 | -0,18 | 0,762042842 | 0,38  | 0,571092292 | -0,24 | 0,724675525 | -0,61 | 0,112780918 | -0,13 | 0,84597948  |
| Gm1123  | 0,28  | 0,729202777 | 0,3   | 0,456323011 | 0,04  | 0,970673334 | -0,04 | 0,957427513 | -0,01 | 0,992997824 |
| Gm11238 | 0,03  | 0,98456417  | 0,16  | 0,9152526   | -0,3  | 0,83492007  | -0,92 | 0,1017821   | -0,22 | 0,790175191 |
| Gm11240 | 0,03  | 0,969986575 | 0,01  | 0,987162042 | -0,1  | 0,899387868 | 0,07  | 0,883575155 | 0,02  | 0,984125319 |
| Gm11264 | 0,68  | 0,306829062 | 0,05  | 0,962980292 | -0,19 | 0,743653977 | 0,35  | 0,512902457 | 0,23  | 0,763164852 |
| Gm11267 | 0,22  | 0,701627731 | 0,31  | 0,65041955  | 0,12  | 0,862480223 | -0,04 | 0,936697929 | -0,14 | 0,839969557 |
| Gm11269 | -0,04 | 0,948926586 | -0,18 | 0,726204935 | -0,03 | 0,977081417 | 0,07  | 0,867914682 | 0,27  | 0,62728046  |
| Gm11292 | 0,06  | 0,918804282 | -0,02 | 0,965413567 | 0,03  | 0,968742139 | -0,2  | 0,591821065 | 0,14  | 0,83730774  |
| Gm11335 | -0,01 | 0,98456417  | 0,39  | 0,615311543 | -0,16 | 0,816372481 | -0,67 | 0,278622648 | -0,11 | 0,883732171 |
| Gm11345 | 0,44  | 0,343457563 | 0,25  | 0,763796207 | 0,24  | 0,69669808  | -0,21 | 0,696843539 | 0,11  | 0,920355527 |
| Gm11346 | 0,15  | 0,793793954 | 0,21  | 0,679801103 | 0,01  | 0,990836784 | -0,09 | 0,793134304 | -0,16 | 0,795692519 |
| Gm11351 | 0,09  | 0,907748757 | 0,07  | 0,945143056 | 0,01  | 0,993379272 | 0,17  | 0,735958592 | -0,12 | 0,866231214 |
| Gm11377 | 0,08  | 0,891140162 | -0,03 | 0,951647929 | -0,39 | 0,401972914 | -0,01 | 0,988205241 | 0,08  | 0,940655462 |
| Gm1140  | 0,12  | 0,919567534 | -0,11 | 0,900801202 | -0,02 | 0,987003605 | 0,19  | 0,720095223 | 0,24  | 0,757342197 |
| Gm1141  | 0,09  | 0,919758492 | 0,15  | 0,891785313 | -0,18 | 0,834406595 | 0,45  | 0,295744579 | 0,2   | 0,735152891 |
| Gm11413 | 0,15  | 0,808485591 | 0,98  | 0,35804906  | -0,32 | 0,569097406 | 0,04  | 0,972244785 | 0,55  | 0,443268905 |
| Gm11418 | 0,06  | 0,933912196 | 0,01  | 0,99819107  | -0,24 | 0,702448924 | 0,11  | 0,831135822 | -0,2  | 0,759948291 |
| Gm11419 | 0,22  | 0,586753542 | 0,04  | 0,932292974 | -0,21 | 0,823823322 | -0,1  | 0,768880868 | 0,03  | 0,974191529 |
| Gm11423 | -0,58 | 0,600952042 | -0,52 | 0,6105339   | 0,72  | 0,483761569 | -0,31 | 0,706619788 | -0,41 | 0,623304657 |
| Gm11426 | 0,01  | 0,991919022 | 0,08  | 0,88052282  | 0,06  | 0,957114647 | -0,04 | 0,923775458 | 0,16  | 0,860034947 |
| Gm11437 | 0,56  | 0,559760851 | 0,12  | 0,863912115 | 0,07  | 0,932640939 | 0,09  | 0,914828446 | 0,07  | 0,960175192 |
| Gm11454 | -0,19 | 0,851543807 | -0,04 | 0,940507154 | -0,46 | 0,324705558 | -0,14 | 0,825884069 | -0,06 | 0,958259949 |
| Gm11465 | -0,09 | 0,841140165 | -0,11 | 0,817110093 | 0,23  | 0,777918093 | -0,68 | 0,379392822 | -0,39 | 0,735152891 |
| Gm11466 | 0     | 0,998027251 | -0,04 | 0,935329426 | -0,24 | 0,714376082 | 0,08  | 0,883821307 | 0,12  | 0,918288793 |
| Gm11468 | -0,06 | 0,960597621 | -0,03 | 0,984006421 | -0,37 | 0,542580907 | -0,12 | 0,741646038 | -0,27 | 0,776814504 |
| Gm11476 | 0,08  | 0,907472618 | -0,11 | 0,880473303 | -0,01 | 0,993280531 | -0,04 | 0,977051333 | -0,31 | 0,735052158 |
| Gm11482 | -0,16 | 0,721378796 | 0,17  | 0,752804236 | -0,34 | 0,546810675 | 0,24  | 0,528088965 | -0,03 | 0,979643119 |
| Gm11487 | -0,06 | 0,934809007 | 0,31  | 0,845936068 | -0,1  | 0,929395646 | -0,25 | 0,716478691 | 0,2   | 0,830575776 |
| Gm11494 | 0,6   | 0,151120124 | 0,16  | 0,75824583  | -0,07 | 0,919116989 | -0,48 | 0,173600687 | -0,8  | 0,104257693 |
| Gm11497 | 0,21  | 0,597345895 | 0,01  | 0,986782918 | -0,28 | 0,560847022 | -0,16 | 0,651916561 | 0,08  | 0,928063484 |
| Gm11513 | 0,32  | 0,64776317  | 0,01  | 0,994486533 | -0,2  | 0,729031049 | -0,31 | 0,660266809 | -0,14 | 0,879072575 |
| Gm11517 | 0,43  | 0,757499328 | 0,59  | 0,231499374 | 0,05  | 0,978877446 | -1,68 | 0,201494819 | 0,32  | 0,861506431 |

|         |       |             |       |             |       |             |       |             |       |             |
|---------|-------|-------------|-------|-------------|-------|-------------|-------|-------------|-------|-------------|
| Gm11525 | -0,03 | 0,960597621 | 0,12  | 0,765325717 | -0,08 | 0,90345282  | -0,04 | 0,941644811 | 0,07  | 0,929780699 |
| Gm11528 | 0,27  | 0,702902826 | 0,17  | 0,664787536 | -0,14 | 0,818061098 | 0,01  | 0,992365775 | 0,03  | 0,968799126 |
| Gm11529 | 0,15  | 0,770640793 | 0,57  | 0,256832878 | 0,3   | 0,720590502 | -0,3  | 0,449729778 | -0,01 | 0,985448733 |
| Gm11536 | 0,21  | 0,882119027 | 1,18  | 0,153049551 | -0,42 | 0,715497532 | -1,28 | 0,111721467 | -0,14 | 0,886027227 |
| Gm11538 | -0,06 | 0,92146582  | -0,14 | 0,769052742 | -0,08 | 0,896181325 | 0,41  | 0,241415896 | 0,05  | 0,952200672 |
| Gm11541 | -0,26 | 0,477363665 | -0,15 | 0,851085879 | -0,18 | 0,755588608 | 0,01  | 0,992906132 | -0,11 | 0,884248437 |
| Gm11543 | -0,26 | 0,660482793 | 0,13  | 0,807100558 | 0,09  | 0,906275304 | -0,36 | 0,328642472 | -0,13 | 0,845142293 |
| Gm11544 | -0,1  | 0,928944712 | -0,22 | 0,853484596 | -0,11 | 0,904057901 | 0,17  | 0,718237629 | -0,12 | 0,891778667 |
| Gm11545 | -0,65 | 0,430173798 | 0,14  | 0,851610126 | 0,1   | 0,898637187 | -0,19 | 0,567728703 | 0,2   | 0,755677288 |
| Gm11546 | -0,04 | 0,976574175 | -0,13 | 0,904258936 | 0,02  | 0,97548193  | 0,09  | 0,923959343 | 0,45  | 0,628127128 |
| Gm11548 | 0,17  | 0,830575431 | -0,04 | 0,954324398 | -0,08 | 0,930836343 | 0,11  | 0,829596652 | 0,4   | 0,479492173 |
| Gm11549 | 0,02  | 0,988559058 | -0,14 | 0,810418074 | 0,03  | 0,985977985 | 0,31  | 0,446566698 | 0,14  | 0,898326354 |
| Gm11559 | 0,2   | 0,657723995 | -0,35 | 0,549517801 | -0,26 | 0,571082984 | -0,06 | 0,920158794 | 0,13  | 0,861056054 |
| Gm11562 | 0,03  | 0,95736548  | 0     | 1           | 0,03  | 0,970939073 | 0     | 0,993034547 | 0,23  | 0,721622418 |
| Gm11563 | 0,05  | 0,963914207 | -0,04 | 0,94021592  | -0,03 | 0,976138805 | -0,13 | 0,775780803 | -0,24 | 0,700875396 |
| Gm11564 | 0,09  | 0,879743728 | 0,35  | 0,674643073 | -0,19 | 0,86182019  | -0,47 | 0,468566806 | -0,17 | 0,865258929 |
| Gm11565 | -0,02 | 0,979507328 | 0,01  | 0,994802028 | 0,15  | 0,790112485 | 0,09  | 0,825017636 | 0,03  | 0,97757951  |
| Gm11567 | 0,79  | 0,185267138 | 0,09  | 0,840864779 | 0,03  | 0,978180623 | -0,18 | 0,754339703 | -0,55 | 0,363127424 |
| Gm11568 | -0,12 | 0,874423952 | 0,08  | 0,906267371 | 0,18  | 0,73437591  | -0,13 | 0,720329719 | -0,15 | 0,802595079 |
| Gm11571 | 0,22  | 0,764288636 | -0,2  | 0,643955364 | -0,46 | 0,33075776  | 0,18  | 0,67892809  | -0,03 | 0,977236465 |
| Gm11579 | 0,49  | 0,476324469 | 0     | 0,998766432 | -0,19 | 0,817106175 | -0,16 | 0,701795528 | 0,06  | 0,940149515 |
| Gm11587 | 0,29  | 0,425778666 | -0,06 | 0,954948291 | -0,22 | 0,732675311 | 0,02  | 0,990647431 | 0     | 0,99981982  |
| Gm11592 | -0,33 | 0,597519827 | -0,06 | 0,950001985 | -0,06 | 0,963199274 | 0     | 0,998710655 | 0,58  | 0,446990293 |
| Gm11595 | -0,02 | 0,98194667  | -0,3  | 0,474277562 | 0,1   | 0,891520069 | 0,48  | 0,306259977 | -0,09 | 0,934242963 |
| Gm11608 | 0,12  | 0,839375532 | -0,15 | 0,80312913  | -0,07 | 0,934310738 | -0,28 | 0,750522003 | -0,23 | 0,768810439 |
| Gm11627 | 0,49  | 0,288309106 | 0,43  | 0,65041955  | -0,17 | 0,873867385 | -0,17 | 0,781338312 | 0,04  | 0,979456872 |
| Gm11634 | 0,03  | 0,959985598 | 0,01  | 0,997700959 | -0,07 | 0,914134206 | -0,15 | 0,810508503 | 0,1   | 0,937446198 |
| Gm11651 | -0,02 | 0,984747015 | 0,46  | 0,581226344 | 0     | 0,998479656 | 0,1   | 0,920563784 | 0,14  | 0,884248437 |
| Gm11665 | 0,05  | 0,947732835 | 0,43  | 0,380348555 | -0,32 | 0,616398569 | -0,16 | 0,778212842 | -0,03 | 0,980961333 |
| Gm11681 | -0,02 | 0,972112267 | -0,16 | 0,762968641 | -0,21 | 0,727913388 | -0,09 | 0,841644929 | -0,25 | 0,673120647 |
| Gm11682 | 0,09  | 0,875464288 | -0,3  | 0,441593532 | -0,46 | 0,380156975 | 0,14  | 0,687560664 | 0,22  | 0,732791395 |
| Gm11683 | 0,22  | 0,771261237 | -0,14 | 0,84536438  | -0,26 | 0,725191296 | -0,11 | 0,838806433 | -0,06 | 0,953297732 |
| Gm11690 | 0,02  | 0,98456417  | -0,09 | 0,839789639 | -0,09 | 0,899065594 | 0,15  | 0,726158589 | 0,07  | 0,943668392 |
| Gm11691 | 0,13  | 0,784951771 | -0,11 | 0,806154008 | -0,04 | 0,961453721 | -0,03 | 0,954851353 | -0,09 | 0,890833196 |
| Gm11695 | 0,05  | 0,944652244 | -0,13 | 0,828818891 | -1,1  | 0,198345401 | -0,11 | 0,900529161 | -0,05 | 0,971975122 |

|         |       |             |       |             |       |             |       |             |       |             |
|---------|-------|-------------|-------|-------------|-------|-------------|-------|-------------|-------|-------------|
| Gm11696 | 0,54  | 0,246652146 | 0,82  | 0,104457339 | -0,41 | 0,292557534 | 0,06  | 0,912858228 | 0,05  | 0,973059526 |
| Gm11713 | -0,33 | 0,449740126 | -0,12 | 0,765325717 | -0,18 | 0,748973263 | -0,01 | 0,976464748 | 0,06  | 0,946463658 |
| Gm11716 | 0,35  | 0,596550801 | 0,36  | 0,51825831  | 0,08  | 0,950631796 | 1,01  | 0,272453582 | 0,48  | 0,731822902 |
| Gm11725 | 0,09  | 0,898116888 | 0,07  | 0,8910846   | -0,08 | 0,926845873 | -0,06 | 0,937644842 | 0,09  | 0,922552018 |
| Gm11730 | -0,18 | 0,824513965 | -0,48 | 0,783677427 | 0,2   | 0,842919139 | -1,03 | 0,122551381 | -1,29 | 0,015668823 |
| Gm11732 | -0,32 | 0,642385552 | 0,07  | 0,919762719 | 0,11  | 0,887630371 | -0,29 | 0,329095126 | 0,04  | 0,959573673 |
| Gm11733 | 0,17  | 0,694699901 | -0,08 | 0,916042399 | -0,55 | 0,302861841 | 0,27  | 0,57659034  | 0,06  | 0,960974478 |
| Gm11734 | 0,06  | 0,958535933 | 0,33  | 0,629493333 | 0,1   | 0,909963525 | -0,1  | 0,887045509 | -0,08 | 0,953297732 |
| Gm11738 | 0     | 0,996219097 | -0,12 | 0,764289173 | 0,05  | 0,946810097 | 0,17  | 0,613255657 | 0,16  | 0,7983507   |
| Gm11744 | -0,26 | 0,691658566 | -0,1  | 0,911024505 | -0,22 | 0,71593256  | -0,06 | 0,949166455 | -0,56 | 0,529102845 |
| Gm11747 | -0,15 | 0,820023436 | 0,2   | 0,732847182 | 0     | 0,999931921 | 0,1   | 0,865534768 | -0,08 | 0,933064949 |
| Gm11754 | 0,2   | 0,763867597 | -0,08 | 0,899624796 | -0,1  | 0,906747817 | 0,34  | 0,692059018 | 0,03  | 0,979392852 |
| Gm11762 | 0,43  | 0,430696208 | 0,1   | 0,858860016 | 0,34  | 0,501826628 | 0,14  | 0,830299574 | 0,3   | 0,702558142 |
| Gm11769 | 0,04  | 0,950127033 | -0,37 | 0,738010919 | 0,39  | 0,493914485 | 0,54  | 0,426547706 | 0,22  | 0,755982506 |
| Gm11770 | 0,14  | 0,719765184 | 0     | 1           | 0     | 0,997220401 | 0,22  | 0,569261287 | 0,15  | 0,827018719 |
| Gm11783 | 0,12  | 0,928733836 | 0,46  | 0,680709276 | -0,01 | 0,993379272 | -2,27 | 0,02448836  | 0,22  | 0,922921816 |
| Gm11787 | 0,04  | 0,946792769 | -0,01 | 0,994137877 | 0,33  | 0,846296601 | 0,06  | 0,925025576 | 0,19  | 0,819072786 |
| Gm11802 | 0,48  | 0,546026761 | -0,36 | 0,382932469 | -0,05 | 0,950862176 | 0,35  | 0,448917988 | 0,45  | 0,587305934 |
| Gm11816 | 0,13  | 0,741661403 | -0,03 | 0,980518468 | -0,15 | 0,834488055 | 0,1   | 0,81500923  | 0,17  | 0,765809384 |
| Gm11820 | -0,12 | 0,865092511 | 0,13  | 0,823530278 | -0,12 | 0,865854998 | -0,04 | 0,930829155 | 0,07  | 0,936246118 |
| Gm11821 | -0,1  | 0,879499432 | -0,36 | 0,594415097 | -0,35 | 0,627891867 | 0,89  | 0,16520007  | 0,6   | 0,563077271 |
| Gm11823 | 0,25  | 0,546348907 | -0,08 | 0,869488567 | -0,38 | 0,637896954 | 0,17  | 0,798222195 | 0,2   | 0,76350671  |
| Gm11832 | -0,14 | 0,810208393 | 0,06  | 0,893005076 | -0,06 | 0,94040947  | 0     | 0,996940393 | 0,01  | 0,992370267 |
| Gm11837 | 0,15  | 0,758514941 | 0,33  | 0,686540452 | -0,29 | 0,618711263 | -0,18 | 0,778817721 | 0,24  | 0,846352172 |
| Gm11844 | -0,32 | 0,495249753 | -0,63 | 0,195387645 | 0,21  | 0,684455958 | -0,07 | 0,908141892 | -0,59 | 0,329135795 |
| Gm11872 | 0,1   | 0,892882966 | 0,17  | 0,828219939 | -0,4  | 0,501826628 | -0,34 | 0,367104963 | 0,18  | 0,801385411 |
| Gm11917 | -0,55 | 0,316599006 | 0,06  | 0,958449675 | -0,18 | 0,813694831 | -0,39 | 0,621810528 | -0,43 | 0,626176831 |
| Gm11938 | -0,02 | 0,971590029 | 0,07  | 0,881138991 | 0,14  | 0,841143044 | -0,26 | 0,548798637 | -0,31 | 0,539613604 |
| Gm11944 | -0,23 | 0,801386084 | 0,07  | 0,924194307 | -0,02 | 0,991168026 | -0,81 | 0,045034122 | -0,14 | 0,824818547 |
| Gm11946 | 0,09  | 0,925019201 | 0,52  | 0,438549879 | -0,18 | 0,864311451 | 0,05  | 0,927735789 | 0,22  | 0,768884521 |
| Gm11958 | 0,08  | 0,897747251 | 0,19  | 0,695689103 | 0,01  | 0,992919703 | -0,08 | 0,849012867 | 0,47  | 0,362275161 |
| Gm11959 | -0,08 | 0,928396151 | 0,13  | 0,814499098 | -0,03 | 0,978012085 | 0,03  | 0,976294623 | -0,08 | 0,946685713 |
| Gm11961 | 0,02  | 0,978126898 | 0,01  | 0,991507752 | -0,22 | 0,660920525 | 0,04  | 0,956015204 | 0,47  | 0,420919138 |
| Gm11963 | -0,03 | 0,976574175 | 0,12  | 0,846739644 | -0,14 | 0,840187016 | -0,05 | 0,931477012 | -0,53 | 0,276369104 |
| Gm11967 | 0,25  | 0,555673418 | 0,1   | 0,844839484 | -0,32 | 0,577363882 | 0     | 1           | 0,28  | 0,587305934 |

|         |       |             |       |             |       |             |       |             |       |             |
|---------|-------|-------------|-------|-------------|-------|-------------|-------|-------------|-------|-------------|
| Gm11973 | 0,34  | 0,795286609 | 0,1   | 0,923659639 | -0,61 | 0,532815251 | 0,03  | 0,979516321 | -0,08 | 0,961281513 |
| Gm11974 | -0,4  | 0,341853862 | -0,37 | 0,6840278   | 0,18  | 0,782825625 | 1,55  | 0,066013104 | 0,5   | 0,541844974 |
| Gm11978 | 0,11  | 0,883923631 | 0,09  | 0,898039508 | -0,03 | 0,977934465 | -0,23 | 0,56016011  | -0,24 | 0,647450029 |
| Gm11981 | -0,3  | 0,764288636 | 0,3   | 0,489168882 | 0,16  | 0,905352348 | -0,5  | 0,77077388  | 0,06  | 0,978905747 |
| Gm11985 | -0,11 | 0,914300986 | -0,03 | 0,966717367 | 0     | 0,997581017 | 0,16  | 0,731281458 | 0     | 0,996714363 |
| Gm11992 | 1,92  | 0,01463807  | 2,24  | 0,043236689 | -0,94 | 0,102228826 | 0,22  | 0,86946471  | 2,03  | 0,011688351 |
| Gm11998 | -0,1  | 0,833606844 | -0,02 | 0,979278737 | -0,13 | 0,906097666 | -0,01 | 0,996287679 | -0,27 | 0,75509516  |
| Gm11999 | 0,17  | 0,808379727 | 0,24  | 0,803629137 | 0,19  | 0,777568498 | 0,09  | 0,882715112 | 0,05  | 0,952686875 |
| Gm12000 | 0,08  | 0,909232325 | 0,14  | 0,785256423 | 0,03  | 0,971479752 | -0,29 | 0,441440243 | -0,11 | 0,900126162 |
| Gm12002 | -0,79 | 0,54401985  | 0,78  | 0,175892375 | -0,28 | 0,773401208 | -2,47 | 0,009399265 | -0,94 | 0,137394562 |
| Gm12018 | 0,37  | 0,595596483 | -0,06 | 0,956049982 | 0,1   | 0,899144679 | -0,36 | 0,468239117 | -0,42 | 0,360726287 |
| Gm12022 | 0,01  | 0,991919022 | 0,13  | 0,754578715 | 0     | 0,999931921 | -0,23 | 0,601996277 | -0,28 | 0,611234576 |
| Gm12052 | 0,17  | 0,791021845 | 0,19  | 0,664787536 | -0,22 | 0,659694447 | -0,06 | 0,885417869 | -0,07 | 0,931435802 |
| Gm12056 | -0,02 | 0,983663467 | -0,06 | 0,91395667  | -0,08 | 0,909963525 | 0,4   | 0,254212331 | 0,41  | 0,434163214 |
| Gm12059 | 0,61  | 0,278797445 | -0,06 | 0,934592657 | 0,44  | 0,369527192 | -0,16 | 0,802755941 | -0,07 | 0,956610289 |
| Gm12060 | 0,17  | 0,766575514 | -0,22 | 0,691058901 | 0,27  | 0,665554804 | -0,33 | 0,584887631 | -0,22 | 0,78512653  |
| Gm12066 | -0,14 | 0,85515494  | -0,1  | 0,881876659 | -0,42 | 0,64473731  | -0,21 | 0,529366123 | -0,08 | 0,930824723 |
| Gm12069 | -0,32 | 0,472897709 | 0,13  | 0,789051952 | -0,28 | 0,541363142 | -0,14 | 0,718553452 | 0,06  | 0,937009323 |
| Gm12070 | 0,28  | 0,57018113  | 0,18  | 0,798757125 | -0,17 | 0,762549825 | -0,1  | 0,820418236 | 0,43  | 0,395349481 |
| Gm12092 | 0,17  | 0,687662951 | 0     | 1           | -0,15 | 0,825782434 | 0,09  | 0,836891857 | 0,26  | 0,621285013 |
| Gm12100 | 0,17  | 0,753482572 | -0,03 | 0,956049982 | -0,33 | 0,522316865 | 0,21  | 0,553383413 | 0,3   | 0,55122001  |
| Gm12108 | 0,07  | 0,902351728 | 0,07  | 0,936502479 | -0,03 | 0,959437564 | 0,02  | 0,963392781 | 0,01  | 0,990935486 |
| Gm12111 | -0,08 | 0,874688734 | 0,08  | 0,8910846   | -0,25 | 0,659555232 | 0,02  | 0,978803096 | 0,2   | 0,751033703 |
| Gm12126 | -0,23 | 0,575887113 | -0,13 | 0,802979985 | -0,18 | 0,783006    | 0,27  | 0,427171447 | -0,02 | 0,979456872 |
| Gm12128 | 0,12  | 0,845495686 | 0,21  | 0,65041955  | -0,26 | 0,670568581 | -0,11 | 0,875371281 | -0,05 | 0,962820357 |
| Gm12130 | 0,08  | 0,882500171 | -0,26 | 0,739345787 | -0,28 | 0,707539555 | -0,08 | 0,88506391  | -0,09 | 0,935812103 |
| Gm12132 | 0,02  | 0,973374807 | 0     | 1           | -0,22 | 0,67539126  | 0,26  | 0,448670175 | 0,19  | 0,810276195 |
| Gm12153 | -0,34 | 0,642516435 | 0,22  | 0,797338097 | 0,28  | 0,66225859  | 0,09  | 0,893841279 | 0,17  | 0,887719506 |
| Gm12159 | 0,11  | 0,824728873 | 0,09  | 0,852461907 | -0,07 | 0,928438649 | -0,05 | 0,905543325 | 0,05  | 0,954565959 |
| Gm12167 | 0,22  | 0,58112831  | 0,34  | 0,45420995  | -0,03 | 0,97548193  | -0,14 | 0,706937999 | -0,01 | 0,984632256 |
| Gm12169 | -0,01 | 0,991919022 | 0,14  | 0,780899501 | -0,26 | 0,634437787 | 0,14  | 0,690997007 | 0,03  | 0,979456872 |
| Gm12171 | 0,02  | 0,978853388 | -0,57 | 0,48645383  | 0,35  | 0,715497532 | 0,4   | 0,721611115 | 0,21  | 0,895402606 |
| Gm12185 | 1,94  | 0,134471564 | 1,37  | 0,090262898 | -2,98 | 0,340783964 | -0,38 | 0,547560357 | 1,95  | 0,015056333 |
| Gm12216 | 1,32  | 0,097625832 | 0,42  | 0,587634717 | -0,9  | 0,428128781 | -1,03 | 0,382504768 | 1,61  | 0,199163495 |
| Gm12227 | 0,21  | 0,689966234 | 0,6   | 0,57261103  | 0,29  | 0,672766751 | -0,81 | 0,117466456 | -0,59 | 0,341504509 |



|         |       |             |       |             |       |             |       |             |       |             |
|---------|-------|-------------|-------|-------------|-------|-------------|-------|-------------|-------|-------------|
| Gm12238 | 0,25  | 0,752808308 | 0,1   | 0,867324954 | -0,03 | 0,987356432 | 0,26  | 0,533955457 | -0,25 | 0,74624632  |
| Gm12248 | 0,29  | 0,825308689 | 0,01  | 0,997700959 | -0,17 | 0,861307315 | -0,07 | 0,921970893 | 0,01  | 0,992022739 |
| Gm12250 | 2,04  | 0,185926518 | 1,57  | 0,043236689 | -2,89 | 0,000229586 | 0,36  | 0,600515219 | 2,23  | 0,006885043 |
| Gm12253 | -0,29 | 0,519304068 | -0,28 | 0,693906911 | -0,19 | 0,770526999 | 0,36  | 0,242691189 | -0,25 | 0,699060093 |
| Gm12264 | -0,07 | 0,921512129 | -0,16 | 0,72545882  | -0,25 | 0,747599709 | 0,09  | 0,906588327 | -0,44 | 0,471145432 |
| Gm12271 | 0,02  | 0,975506993 | 0,17  | 0,794433212 | -0,08 | 0,926974012 | -0,16 | 0,734672335 | -0,14 | 0,848679763 |
| Gm12273 | 0,12  | 0,841140165 | 0,13  | 0,826290896 | -0,13 | 0,896164273 | 0,14  | 0,77038356  | 0,45  | 0,358596488 |
| Gm12279 | 0,56  | 0,498560785 | -0,03 | 0,987914512 | 0,31  | 0,706831845 | 0,14  | 0,831253708 | -0,01 | 0,9939542   |
| Gm12280 | 0,15  | 0,697356307 | 0,03  | 0,954307545 | -0,05 | 0,941551083 | 0,01  | 0,980761574 | 0,07  | 0,934615324 |
| Gm12289 | -0,04 | 0,962810563 | -0,02 | 0,985764487 | 0,09  | 0,899027669 | 0,11  | 0,752184911 | 0,21  | 0,714308672 |
| Gm12290 | 0,47  | 0,401159049 | 0,08  | 0,925569254 | 0,06  | 0,943144399 | -0,16 | 0,829714145 | -0,02 | 0,99004065  |
| Gm12292 | -0,12 | 0,840909921 | -0,06 | 0,925785899 | -0,06 | 0,955586257 | -0,02 | 0,980617899 | 0,17  | 0,847424577 |
| Gm12295 | -0,17 | 0,717407143 | -0,05 | 0,948771582 | -0,08 | 0,924998874 | 0,26  | 0,657656798 | 0,14  | 0,91314596  |
| Gm12296 | 0,02  | 0,978126898 | -0,1  | 0,882847123 | -0,29 | 0,570314838 | 0,62  | 0,283962479 | 0,44  | 0,427146889 |
| Gm12298 | 0,19  | 0,672753295 | -0,08 | 0,938088718 | -0,16 | 0,821033224 | 0,11  | 0,85567266  | -0,13 | 0,882728747 |
| Gm12299 | 0,14  | 0,734592394 | -0,08 | 0,872187376 | -0,18 | 0,715851354 | -0,06 | 0,896532431 | -0,11 | 0,872417427 |
| Gm12300 | -0,15 | 0,840563112 | -0,55 | 0,320110802 | -0,18 | 0,8768401   | 0,16  | 0,800853287 | 0,01  | 0,991980521 |
| Gm12320 | 0,32  | 0,67806773  | -0,11 | 0,907186434 | -0,25 | 0,665554804 | 0,06  | 0,930913487 | -0,02 | 0,98653183  |
| Gm12326 | 0,2   | 0,714127381 | 0,1   | 0,826870861 | -0,03 | 0,97268496  | 0,09  | 0,832134224 | 0,22  | 0,77413061  |
| Gm12348 | 0     | 0,996998625 | 0,23  | 0,664787536 | 0,27  | 0,565711825 | -0,3  | 0,584124949 | -0,27 | 0,699996356 |
| Gm12349 | 0,23  | 0,613058828 | 0,23  | 0,752038109 | -0,16 | 0,826241249 | -0,04 | 0,944802384 | 0,09  | 0,912890826 |
| Gm12354 | 0,19  | 0,717407143 | -0,1  | 0,831580851 | -0,04 | 0,958214619 | 0,04  | 0,93355189  | 0,02  | 0,981439632 |
| Gm12359 | 0,33  | 0,711274014 | -0,08 | 0,908093773 | 0,32  | 0,602775092 | 0,31  | 0,670229359 | -0,18 | 0,917710291 |
| Gm12371 | -0,12 | 0,79249191  | 0,09  | 0,855632384 | -0,05 | 0,950725218 | -0,02 | 0,967047406 | -0,15 | 0,807620467 |
| Gm12374 | 0,18  | 0,707197684 | 0,04  | 0,970762922 | 0     | 0,999329448 | -0,33 | 0,27730032  | -0,18 | 0,823098095 |
| Gm12381 | 0,05  | 0,950837484 | 0,2   | 0,89957502  | -0,32 | 0,616398569 | 0,5   | 0,522354619 | 0,55  | 0,61366452  |
| Gm12404 | 0,16  | 0,761457464 | -0,07 | 0,88928164  | -0,25 | 0,715497532 | 0,22  | 0,604464705 | 0,39  | 0,436708262 |
| Gm12405 | 0,09  | 0,863128143 | 0,18  | 0,845833295 | -0,3  | 0,616978696 | -0,09 | 0,909420447 | -0,02 | 0,987143832 |
| Gm12408 | -0,05 | 0,959985598 | -0,26 | 0,781046971 | -0,18 | 0,82622365  | 0,27  | 0,531023057 | 0,17  | 0,774518756 |
| Gm12409 | 0,13  | 0,901059304 | 0,23  | 0,808498635 | -0,24 | 0,73088855  | -0,24 | 0,510847286 | 0,44  | 0,42760723  |
| Gm12414 | 0,28  | 0,633989663 | -0,12 | 0,824372931 | -0,38 | 0,452724044 | 0,39  | 0,24812886  | 0,23  | 0,689405962 |
| Gm12436 | 0,27  | 0,596273756 | 0,01  | 0,994486533 | 0,16  | 0,802534871 | -0,01 | 0,988777946 | -0,07 | 0,938464659 |
| Gm12440 | 0,15  | 0,840909921 | -0,66 | 0,530207532 | -0,23 | 0,64759465  | 0,09  | 0,859859031 | -0,24 | 0,823098095 |
| Gm12446 | -0,02 | 0,988590789 | -0,26 | 0,818072947 | 0,02  | 0,990836784 | 0,47  | 0,270661824 | -0,32 | 0,565817768 |
| Gm12472 | -0,79 | 0,127439636 | -0,04 | 0,970762922 | -0,62 | 0,500343254 | 0,12  | 0,822355466 | 0,5   | 0,612920986 |

|         |       |             |       |             |       |             |       |             |       |             |
|---------|-------|-------------|-------|-------------|-------|-------------|-------|-------------|-------|-------------|
| Gm12474 | -0,28 | 0,58079696  | 0,15  | 0,848709687 | -0,24 | 0,879211997 | -0,26 | 0,759473443 | -0,13 | 0,885318142 |
| Gm12496 | 0,14  | 0,896207658 | -0,52 | 0,460241239 | -0,07 | 0,950846671 | 0,06  | 0,929835301 | -0,05 | 0,954004872 |
| Gm12500 | 0,32  | 0,51559695  | 0,4   | 0,624860312 | -0,18 | 0,811424918 | -0,54 | 0,365687993 | 0,08  | 0,924811768 |
| Gm12503 | -0,25 | 0,65558562  | -0,45 | 0,725935658 | 0,32  | 0,536255497 | 0,33  | 0,507364947 | -0,57 | 0,335679372 |
| Gm12504 | 0,18  | 0,759345718 | 0,19  | 0,702676308 | -0,13 | 0,804716642 | -0,24 | 0,693114046 | -0,24 | 0,767285294 |
| Gm12505 | 0,02  | 0,984759626 | 0,15  | 0,851085879 | 0,25  | 0,680127367 | -0,06 | 0,940173258 | -0,15 | 0,872665918 |
| Gm12511 | 0,21  | 0,687700083 | -0,13 | 0,880892852 | -0,22 | 0,66899373  | -0,11 | 0,81096279  | 0,2   | 0,723036695 |
| Gm12514 | -0,19 | 0,752862409 | -0,32 | 0,74447539  | 0,21  | 0,823823322 | 0,54  | 0,260618293 | -0,06 | 0,949032619 |
| Gm12519 | 0,37  | 0,576009654 | -0,33 | 0,435489861 | -0,16 | 0,920828015 | 0,19  | 0,670124154 | 0,06  | 0,952190189 |
| Gm12522 | -0,16 | 0,792735264 | 0,09  | 0,891785313 | -0,12 | 0,90672161  | 0,3   | 0,455665869 | 0,04  | 0,976743304 |
| Gm12526 | 0,29  | 0,474293292 | 0,1   | 0,825692608 | -0,26 | 0,628978443 | 0,02  | 0,966197507 | 0,05  | 0,964102498 |
| Gm12530 | 0,35  | 0,724803365 | -0,24 | 0,845712013 | -0,62 | 0,574010446 | -0,16 | 0,702311689 | -0,32 | 0,836061657 |
| Gm12532 | 0,15  | 0,871941635 | 0,31  | 0,80097084  | -0,02 | 0,983471086 | 0,28  | 0,594365292 | 0,14  | 0,911546254 |
| Gm12536 | -0,46 | 0,407413822 | -0,31 | 0,611052267 | -0,15 | 0,81745518  | 0,03  | 0,963392781 | -0,07 | 0,947870845 |
| Gm12542 | -0,01 | 0,995091369 | -0,1  | 0,94576641  | 0,26  | 0,68845998  | 0,18  | 0,758588473 | -0,01 | 0,990633766 |
| Gm12569 | 0,57  | 0,358647594 | 0,14  | 0,90781211  | -0,16 | 0,830863298 | -0,07 | 0,915691108 | 0,32  | 0,64987147  |
| Gm12576 | -0,26 | 0,594739156 | 0,11  | 0,853569707 | -0,04 | 0,955257293 | 0,09  | 0,866182539 | 0,01  | 0,990610351 |
| Gm12580 | 0,29  | 0,676493413 | -0,01 | 0,982786635 | -0,12 | 0,85092959  | 0,04  | 0,939446012 | -0,1  | 0,882728747 |
| Gm12589 | 0,2   | 0,66317593  | -0,05 | 0,966717367 | -0,59 | 0,212877741 | -0,15 | 0,811871922 | -0,19 | 0,884640084 |
| Gm12592 | 0,43  | 0,536274184 | 0,59  | 0,600432986 | 0,12  | 0,897233315 | -1,09 | 0,243876155 | 0,95  | 0,077829955 |
| Gm12596 | -0,08 | 0,92942071  | -0,14 | 0,782590588 | 0,69  | 0,209534486 | 1,02  | 0,05155344  | 0     | 0,996197742 |
| Gm12602 | -0,15 | 0,858869926 | 0,2   | 0,696346398 | 0,35  | 0,711793051 | -1,01 | 0,019972855 | -0,38 | 0,723032197 |
| Gm12603 | -0,35 | 0,62872508  | 0,33  | 0,864890775 | 1,22  | 0,280580035 | 0,13  | 0,796683837 | 0,17  | 0,852287138 |
| Gm12606 | 0,25  | 0,739638841 | 0,09  | 0,845112339 | 0,28  | 0,598179126 | 0,23  | 0,709580416 | 0,37  | 0,574689193 |
| Gm12610 | -0,12 | 0,904633081 | 0,28  | 0,582154512 | -0,15 | 0,943788892 | 0     | 0,996828586 | 0,27  | 0,696249488 |
| Gm12633 | 0,08  | 0,906202066 | 0,01  | 0,995590426 | 0,06  | 0,94940954  | -0,04 | 0,963977397 | 0,15  | 0,861819841 |
| Gm12637 | 0,03  | 0,966703421 | -0,02 | 0,989633095 | -0,2  | 0,747599709 | -0,01 | 0,980947421 | 0,05  | 0,960974478 |
| Gm12657 | 0,16  | 0,763907846 | 0,11  | 0,791426435 | 0,01  | 0,996265665 | 0,01  | 0,988205241 | 0,2   | 0,765419939 |
| Gm12669 | -0,07 | 0,920050311 | -0,35 | 0,424068004 | 0,16  | 0,838289412 | 0,19  | 0,627945398 | -0,24 | 0,694007461 |
| Gm12678 | -0,06 | 0,910311858 | 0,02  | 0,981586987 | 0,25  | 0,647047222 | 0,17  | 0,679121298 | 0,04  | 0,968952017 |
| Gm12680 | 0,03  | 0,972028231 | -0,06 | 0,912137323 | -0,03 | 0,983471086 | 0,34  | 0,472803467 | -0,14 | 0,817563348 |
| Gm12688 | 0,04  | 0,948926586 | 0,17  | 0,693906911 | -0,18 | 0,706714392 | -0,06 | 0,8914104   | -0,1  | 0,8897371   |
| Gm12689 | -0,02 | 0,989017567 | -0,04 | 0,954760343 | -0,19 | 0,781536696 | 0,04  | 0,95852873  | -0,1  | 0,932846086 |
| Gm12695 | 0,32  | 0,480085261 | -0,3  | 0,824372931 | -0,4  | 0,530603857 | 0,18  | 0,685226398 | 0,28  | 0,635285358 |
| Gm12703 | -0,02 | 0,986795639 | 0,55  | 0,670629152 | -0,63 | 0,310116603 | -1,36 | 0,137777394 | -0,48 | 0,668008337 |

|         |       |             |       |             |       |             |       |             |       |             |
|---------|-------|-------------|-------|-------------|-------|-------------|-------|-------------|-------|-------------|
| Gm12707 | 0,23  | 0,64866902  | -0,07 | 0,887752277 | -0,27 | 0,560191012 | -0,14 | 0,854613369 | 0,1   | 0,937558003 |
| Gm12708 | 0,09  | 0,902747659 | 0,36  | 0,586770731 | -0,33 | 0,628048897 | -0,65 | 0,23198829  | -0,1  | 0,952718905 |
| Gm12709 | 0,35  | 0,369418071 | -0,41 | 0,530207532 | 0,02  | 0,984778342 | 0,4   | 0,247714087 | 0,19  | 0,740705017 |
| Gm12718 | -0,11 | 0,834672627 | 0,15  | 0,786394409 | -0,27 | 0,731498378 | -0,12 | 0,854342596 | -0,07 | 0,948902333 |
| Gm12724 | -0,14 | 0,840909921 | -0,35 | 0,491778988 | 0,02  | 0,984536409 | 0,26  | 0,614572215 | -0,07 | 0,944241841 |
| Gm12758 | 0,07  | 0,891309235 | 0,24  | 0,546908088 | -0,43 | 0,343594254 | -0,06 | 0,911258809 | 0,09  | 0,922086387 |
| Gm12781 | -0,34 | 0,729108809 | 0,15  | 0,855974935 | -0,17 | 0,811424918 | 0,12  | 0,791387489 | 0,33  | 0,641944263 |
| Gm12784 | 0,2   | 0,655623232 | -0,08 | 0,932918674 | 0,08  | 0,941063967 | 0,43  | 0,346456077 | 0,09  | 0,902802615 |
| Gm12786 | -0,24 | 0,651614017 | -0,36 | 0,692189927 | 0,23  | 0,718340918 | -0,11 | 0,868114518 | -0,23 | 0,830813323 |
| Gm12789 | -0,2  | 0,728516314 | -0,47 | 0,661734303 | 0,07  | 0,928115273 | 0,46  | 0,339924361 | 0     | 0,994364442 |
| Gm12790 | -0,57 | 0,178543406 | -0,2  | 0,853569707 | -0,29 | 0,657277431 | 0,51  | 0,447104269 | 0,24  | 0,776907684 |
| Gm12794 | 0     | 0,998210173 | 0,09  | 0,933778158 | -0,3  | 0,751758339 | 0,55  | 0,310873282 | -0,03 | 0,982175252 |
| Gm128   | -0,44 | 0,406117675 | -0,03 | 0,958545812 | -0,65 | 0,473499244 | 0,09  | 0,830668785 | 0,02  | 0,983469081 |
| Gm12802 | -0,2  | 0,704720946 | -0,26 | 0,767178812 | -0,16 | 0,841942589 | 0,42  | 0,474049309 | 0,16  | 0,856900046 |
| Gm12829 | 0,21  | 0,586458491 | 0     | 0,999395995 | 0,05  | 0,967767582 | 0,03  | 0,946511818 | -0,21 | 0,728530603 |
| Gm12830 | 0,2   | 0,766705553 | 0     | 1           | -0,31 | 0,527689832 | 0,22  | 0,542354665 | -0,11 | 0,885726941 |
| Gm12853 | 0,32  | 0,632420805 | 0,04  | 0,941603439 | -0,37 | 0,502965724 | -0,39 | 0,585277734 | -0,44 | 0,566248044 |
| Gm12863 | -0,03 | 0,954746388 | -0,01 | 0,989036108 | -0,09 | 0,917672398 | -0,04 | 0,935326628 | -0,06 | 0,948163009 |
| Gm12866 | 0,37  | 0,52759289  | 0,08  | 0,886649849 | -0,24 | 0,671222427 | 0,04  | 0,961123444 | 0,11  | 0,937446198 |
| Gm12880 | -0,36 | 0,597080663 | 0,56  | 0,58096097  | -0,61 | 0,324321658 | -0,62 | 0,487885164 | -0,36 | 0,731865047 |
| Gm12886 | 0,13  | 0,827055517 | -0,25 | 0,7152443   | -0,04 | 0,968279743 | 0,28  | 0,648766563 | -0,21 | 0,835191    |
| Gm12887 | 0,03  | 0,983663467 | 0,14  | 0,82574433  | 0,17  | 0,841942589 | 0,12  | 0,883126383 | 0,09  | 0,9162287   |
| Gm12888 | -0,1  | 0,871982685 | 0,78  | 0,179929628 | -0,1  | 0,91378871  | -0,19 | 0,687560664 | 0,16  | 0,847424577 |
| Gm12907 | 0,05  | 0,952385678 | 0,15  | 0,90781211  | -0,41 | 0,650169259 | -0,06 | 0,947809027 | -0,32 | 0,676744294 |
| Gm12911 | -0,18 | 0,701414945 | -0,15 | 0,765370871 | -0,14 | 0,8026742   | -0,3  | 0,582057967 | 0,07  | 0,948356387 |
| Gm12915 | 0,07  | 0,93113484  | 0,41  | 0,711626342 | 0     | 0,997779809 | 0,41  | 0,37252791  | 0,27  | 0,70401038  |
| Gm12916 | 0,08  | 0,903419342 | 0,23  | 0,760742789 | -0,04 | 0,952104131 | -0,11 | 0,775866079 | 0,46  | 0,347158944 |
| Gm12925 | 0,07  | 0,919989774 | -0,28 | 0,785521672 | -0,14 | 0,942112992 | 0,64  | 0,483129666 | 0,26  | 0,809383333 |
| Gm12927 | 0,05  | 0,95538722  | 0,11  | 0,872388615 | 0,07  | 0,915447788 | 0,3   | 0,55241099  | -0,04 | 0,97098398  |
| Gm12942 | 0,32  | 0,458945277 | 0,27  | 0,706028548 | 0,77  | 0,370554673 | -1    | 0,173572118 | -0,91 | 0,271576025 |
| Gm12945 | 0,11  | 0,842292335 | 0,16  | 0,692810551 | -0,05 | 0,943788892 | -0,18 | 0,643150861 | -0,09 | 0,928063484 |
| Gm12977 | -0,13 | 0,761457464 | 0,09  | 0,884239192 | -0,32 | 0,504301089 | 0,27  | 0,375830483 | 0,18  | 0,770113594 |
| Gm12984 | -0,2  | 0,840909921 | 0,85  | 0,431022747 | 0,12  | 0,903345253 | -0,24 | 0,733284121 | 0,5   | 0,684349871 |
| Gm12992 | -0,16 | 0,782889069 | -0,09 | 0,954324398 | -0,36 | 0,70635953  | 0,28  | 0,696746088 | 0,33  | 0,673325144 |
| Gm12996 | 0     | 0,995491315 | -0,09 | 0,864989815 | -0,23 | 0,716743339 | 0,05  | 0,913974287 | 0,04  | 0,962423334 |

|         |       |             |       |             |       |             |       |             |       |             |
|---------|-------|-------------|-------|-------------|-------|-------------|-------|-------------|-------|-------------|
| Gm13001 | 0,4   | 0,366923105 | 0,14  | 0,864958331 | -0,11 | 0,904132011 | -0,04 | 0,969963471 | -0,15 | 0,916900441 |
| Gm13003 | 0     | 0,996219097 | -0,03 | 0,970762922 | 0,04  | 0,978877446 | 0,14  | 0,750199655 | 0,17  | 0,800540569 |
| Gm13016 | 0,53  | 0,353593061 | 0,11  | 0,867834749 | -0,02 | 0,987208663 | 0,15  | 0,812048135 | 0,59  | 0,504201737 |
| Gm13021 | 0,44  | 0,442787463 | -0,37 | 0,717526173 | -0,35 | 0,375756922 | -0,05 | 0,971149993 | -0,14 | 0,924447831 |
| Gm13023 | 0,05  | 0,95176371  | -0,61 | 0,402975324 | 0,04  | 0,952888594 | 0,07  | 0,962670023 | -0,14 | 0,925858284 |
| Gm13025 | 0,38  | 0,55640978  | -0,18 | 0,786394409 | -0,61 | 0,323768621 | 0,1   | 0,791386623 | -0,02 | 0,98366735  |
| Gm13031 | 0,08  | 0,897717279 | 0     | 1           | -0,2  | 0,70635953  | -0,2  | 0,606787549 | -0,2  | 0,715928244 |
| Gm13032 | -0,07 | 0,935644409 | 0,03  | 0,990380046 | 0,17  | 0,823705452 | -0,26 | 0,634720695 | 0,06  | 0,948163009 |
| Gm13034 | -0,21 | 0,737939986 | -0,15 | 0,842663656 | -0,48 | 0,538676107 | 0,18  | 0,899003207 | 0,26  | 0,88288747  |
| Gm13049 | 0,13  | 0,789064068 | -0,24 | 0,807175471 | 0,05  | 0,955984004 | -0,04 | 0,959958662 | -0,13 | 0,893411233 |
| Gm1305  | -0,03 | 0,972701787 | -0,14 | 0,845663274 | 0,14  | 0,840420979 | 0,2   | 0,73719503  | 0,11  | 0,887722358 |
| Gm13056 | -0,17 | 0,844104386 | -0,03 | 0,972505904 | -0,13 | 0,890499122 | -0,71 | 0,07770141  | -0,63 | 0,236669428 |
| Gm13066 | -0,08 | 0,865055523 | -0,03 | 0,972299902 | 0,07  | 0,922807267 | -0,01 | 0,982212444 | 0,24  | 0,752187547 |
| Gm13067 | -0,15 | 0,755116147 | 0,01  | 0,98410255  | -0,08 | 0,922971065 | 0,24  | 0,48485622  | 0,16  | 0,817910544 |
| Gm13078 | -0,61 | 0,425529405 | 0,65  | 0,31069547  | -0,02 | 0,985187368 | -0,67 | 0,230415121 | 0,13  | 0,940092696 |
| Gm13083 | 0,06  | 0,944652244 | 0,26  | 0,621731873 | -0,26 | 0,783052291 | 0,18  | 0,783708375 | 0     | 0,997240132 |
| Gm13084 | -0,37 | 0,615928113 | 0,38  | 0,461889809 | -1,16 | 0,064246958 | -0,14 | 0,899335603 | 0,24  | 0,856534656 |
| Gm13088 | 0,03  | 0,965998749 | -0,14 | 0,815397153 | -0,03 | 0,971268254 | 0     | 0,993337409 | 0     | 0,994270272 |
| Gm13089 | -0,47 | 0,351518071 | 0,08  | 0,974159037 | -0,85 | 0,057900017 | 0,31  | 0,345959296 | 0,06  | 0,950883847 |
| Gm13093 | 0,2   | 0,777335496 | 0,3   | 0,809683705 | 0,18  | 0,83442082  | 0,39  | 0,475457251 | 0,23  | 0,827532593 |
| Gm13097 | -0,17 | 0,791021845 | -0,35 | 0,619597617 | 0,1   | 0,926091985 | 0,08  | 0,868890838 | 0,2   | 0,752187547 |
| Gm13102 | 0,46  | 0,707480624 | 0,39  | 0,73623784  | -0,32 | 0,777810365 | 0,4   | 0,321184055 | 0,48  | 0,54877753  |
| Gm13110 | 0,04  | 0,965482773 | 0,12  | 0,783677427 | -0,17 | 0,804607903 | 0,15  | 0,65935897  | 0,07  | 0,947254077 |
| Gm13111 | 0,05  | 0,932324918 | -0,04 | 0,931676012 | 0,06  | 0,944441051 | -0,08 | 0,896599656 | -0,21 | 0,771954227 |
| Gm13112 | 0,2   | 0,865689677 | -0,27 | 0,763299388 | 0,17  | 0,801068997 | 0,07  | 0,923775458 | -0,12 | 0,923530475 |
| Gm13119 | -0,22 | 0,736625342 | -0,13 | 0,857950143 | -0,07 | 0,899144679 | 0,09  | 0,869855587 | -0,26 | 0,681548675 |
| Gm13124 | 0,09  | 0,8874109   | -0,14 | 0,762968641 | 0,12  | 0,878035827 | -0,02 | 0,984219712 | -0,04 | 0,962525821 |
| Gm13125 | 0,31  | 0,432863869 | 0,19  | 0,77325041  | -0,14 | 0,783749875 | 0,28  | 0,678068491 | 0,43  | 0,46391899  |
| Gm13128 | -0,13 | 0,810101389 | 0,24  | 0,726494244 | 0,04  | 0,963221639 | 0,07  | 0,929089137 | -0,02 | 0,98632971  |
| Gm13139 | 0,09  | 0,925510521 | 0,89  | 0,150681594 | -0,32 | 0,707539555 | 0,58  | 0,161626639 | 0,43  | 0,461334294 |
| Gm13154 | 0,17  | 0,777335496 | -0,22 | 0,896322235 | -0,03 | 0,987208663 | 0,85  | 0,268448842 | -0,4  | 0,626176831 |
| Gm13157 | 0,02  | 0,986216037 | 0,8   | 0,579053234 | -0,69 | 0,693459873 | 0,01  | 0,994269239 | -0,08 | 0,912890826 |
| Gm13177 | 0,23  | 0,718901325 | 0,05  | 0,947441962 | -0,11 | 0,904057901 | 0,07  | 0,922740736 | 0,16  | 0,824505901 |
| Gm13178 | 0,34  | 0,496008309 | 0,38  | 0,328590486 | 0,09  | 0,920158784 | -0,1  | 0,816912202 | -0,15 | 0,825564898 |
| Gm13179 | 0,29  | 0,488619512 | -0,22 | 0,751382934 | -0,25 | 0,69945431  | 0,22  | 0,672331878 | 0,55  | 0,373032993 |

|         |       |             |       |             |       |             |       |             |       |             |
|---------|-------|-------------|-------|-------------|-------|-------------|-------|-------------|-------|-------------|
| Gm13180 | 0,4   | 0,377549804 | 0     | 1           | 0,07  | 0,917981605 | 0,01  | 0,986953051 | 0,12  | 0,858526809 |
| Gm13199 | 0,66  | 0,479545376 | -0,23 | 0,793603525 | -0,11 | 0,921956183 | 0,31  | 0,673745804 | 0,25  | 0,8155257   |
| Gm13201 | 0,07  | 0,909167171 | 0,1   | 0,857150924 | 0,03  | 0,963199274 | -0,17 | 0,874701048 | 0,59  | 0,587305934 |
| Gm13211 | 0,05  | 0,95071774  | -0,04 | 0,94892312  | 0,09  | 0,914988064 | -0,04 | 0,932800758 | -0,02 | 0,985300306 |
| Gm13219 | -0,09 | 0,85617916  | 0,08  | 0,924916733 | -0,19 | 0,720069267 | -0,15 | 0,705559664 | -0,1  | 0,910829332 |
| Gm1322  | 0,04  | 0,963206764 | 0,1   | 0,836009505 | -0,17 | 0,738890123 | 0     | 0,996940393 | -0,18 | 0,765419939 |
| Gm13238 | 0,19  | 0,757499328 | -0,11 | 0,874837295 | 0,01  | 0,994877004 | 0,49  | 0,281068307 | 0,2   | 0,841160223 |
| Gm13247 | -0,25 | 0,833911532 | -0,42 | 0,867324954 | 0,36  | 0,817818413 | 0,68  | 0,475272978 | 0,48  | 0,347905594 |
| Gm13251 | -0,79 | 0,401159049 | -0,64 | 0,611052267 | 1,96  | 0,025431132 | 1,03  | 0,241566488 | -0,47 | 0,724610612 |
| Gm13257 | -0,09 | 0,903028543 | 0,21  | 0,786583797 | 0,16  | 0,858535508 | -0,18 | 0,774826947 | 0,03  | 0,979845089 |
| Gm13261 | 0,12  | 0,840909921 | 0,02  | 0,982047684 | 0     | 0,997816755 | 0,12  | 0,726953267 | 0,01  | 0,986418729 |
| Gm13262 | -0,01 | 0,991919022 | 0,23  | 0,649611595 | -0,11 | 0,861307315 | -0,15 | 0,701167068 | 0,06  | 0,93957001  |
| Gm13264 | -0,22 | 0,862322913 | 0,13  | 0,772270394 | -0,4  | 0,82162081  | -0,35 | 0,526586186 | 0,52  | 0,415885812 |
| Gm13267 | -0,07 | 0,919567534 | 0,16  | 0,859954464 | -0,01 | 0,995376817 | -0,05 | 0,945086901 | 0,35  | 0,646672171 |
| Gm13269 | 0,97  | 0,257412546 | -0,27 | 0,525873177 | 0,07  | 0,95204022  | 0,11  | 0,880386938 | 0,14  | 0,903241997 |
| Gm13271 | -0,04 | 0,969887466 | -0,14 | 0,91825465  | -0,03 | 0,980447951 | 0,39  | 0,601868312 | -0,14 | 0,900126162 |
| Gm13272 | -0,1  | 0,87774325  | 0,13  | 0,809683705 | 0,05  | 0,950846671 | 0,03  | 0,954118959 | -0,08 | 0,918529364 |
| Gm13274 | 0,13  | 0,773711275 | 0,07  | 0,88741189  | -0,08 | 0,93127773  | 0,01  | 0,993704041 | 0,12  | 0,872242794 |
| Gm13275 | -0,16 | 0,834551395 | 0,03  | 0,969019461 | 0,15  | 0,897233315 | -0,38 | 0,596892735 | -0,05 | 0,972231257 |
| Gm13288 | 0,16  | 0,772855197 | 0,12  | 0,909329669 | 0,04  | 0,95907725  | -0,06 | 0,912858228 | 0,24  | 0,792404969 |
| Gm13293 | 0,4   | 0,302609278 | 0,09  | 0,867324954 | -0,23 | 0,757401691 | -0,03 | 0,949328732 | -0,04 | 0,954892212 |
| Gm13315 | -0,16 | 0,738549761 | -0,11 | 0,80000598  | 0,05  | 0,94968597  | 0,19  | 0,644043374 | 0,16  | 0,807620467 |
| Gm13322 | 0,23  | 0,59710379  | 0,09  | 0,857732355 | 0,08  | 0,906097666 | -0,01 | 0,985580087 | -0,21 | 0,766703448 |
| Gm13363 | 0,11  | 0,805603729 | 0,11  | 0,816131136 | -0,18 | 0,792886254 | 0,19  | 0,60775425  | 0,43  | 0,443159458 |
| Gm13372 | 0,1   | 0,840621481 | 0,19  | 0,855474571 | -0,15 | 0,823396412 | 0,03  | 0,953998829 | -0,16 | 0,794517953 |
| Gm13373 | 0,25  | 0,53638431  | 0,08  | 0,888759454 | -0,02 | 0,978012085 | -0,31 | 0,418317818 | -0,19 | 0,781405349 |
| Gm13375 | -0,13 | 0,839871081 | 0,1   | 0,855632384 | 0,04  | 0,971268254 | 0,13  | 0,698748695 | 0     | 0,996410895 |
| Gm13383 | 0,2   | 0,668744886 | -0,01 | 0,988550087 | -0,24 | 0,738086762 | -0,16 | 0,671991774 | -0,11 | 0,888182112 |
| Gm13387 | -0,09 | 0,897481914 | -0,69 | 0,496223407 | -0,6  | 0,647988621 | -0,45 | 0,520461753 | -0,53 | 0,513776994 |
| Gm13388 | 0,06  | 0,903817676 | 0,1   | 0,820806352 | -0,5  | 0,43825018  | 0,12  | 0,814810741 | 0,08  | 0,951223734 |
| Gm13391 | 0,39  | 0,719765184 | 0,27  | 0,883843639 | 0,2   | 0,830685724 | 0,33  | 0,604909385 | 0,12  | 0,873662525 |
| Gm13398 | 0,3   | 0,459727265 | 0,16  | 0,785573503 | 0,04  | 0,962766843 | -0,53 | 0,399704677 | 0,28  | 0,70401038  |
| Gm13403 | 0,04  | 0,958013568 | 0,15  | 0,851610126 | -0,26 | 0,714602776 | 0,24  | 0,606590988 | 0,02  | 0,980961333 |
| Gm13415 | 0,17  | 0,782203502 | 0,2   | 0,763005394 | -0,44 | 0,713202106 | -0,61 | 0,307458691 | 0     | 0,997929588 |
| Gm13420 | 0,33  | 0,48291756  | -0,2  | 0,597797624 | 0,1   | 0,914354795 | 0,34  | 0,465741241 | -0,17 | 0,843351909 |

|         |       |             |       |             |       |             |       |             |       |             |
|---------|-------|-------------|-------|-------------|-------|-------------|-------|-------------|-------|-------------|
| Gm13425 | -0,21 | 0,565823399 | -0,15 | 0,75380926  | -0,28 | 0,628048897 | -0,01 | 0,993337409 | -0,22 | 0,735152891 |
| Gm13427 | 0,31  | 0,679451519 | -0,23 | 0,74287552  | -0,23 | 0,840332164 | 0,12  | 0,931477012 | 0,45  | 0,727467247 |
| Gm13429 | 0,34  | 0,660979798 | -0,24 | 0,619597617 | -0,16 | 0,820503383 | 0,36  | 0,612464969 | 0,18  | 0,865258929 |
| Gm13446 | 0,26  | 0,65525391  | 0,17  | 0,753518459 | -0,22 | 0,663430276 | 0,01  | 0,994638711 | -0,27 | 0,687514851 |
| Gm13470 | -0,11 | 0,903817676 | 0,17  | 0,880259895 | -0,21 | 0,807486378 | -1,02 | 0,235073959 | -0,71 | 0,362980572 |
| Gm13480 | 0,4   | 0,460726931 | 0,01  | 0,997283484 | 0,38  | 0,733092626 | 0,32  | 0,393679043 | 0,55  | 0,219210988 |
| Gm13481 | 0,32  | 0,563164718 | -0,1  | 0,864680059 | -0,19 | 0,682692533 | -0,2  | 0,554289087 | 0,22  | 0,738260196 |
| Gm13483 | -0,1  | 0,879127832 | 0,72  | 0,668839557 | -0,69 | 0,66027586  | -0,19 | 0,818544993 | 0,66  | 0,527815148 |
| Gm13490 | -0,23 | 0,747914748 | 0,19  | 0,891099    | 0,08  | 0,938864861 | 0,26  | 0,631514757 | 0,4   | 0,613819544 |
| Gm13497 | -0,12 | 0,7830424   | 0,1   | 0,817367084 | 0,04  | 0,957041977 | -0,03 | 0,965653854 | -0,37 | 0,481873486 |
| Gm13498 | 0     | 0,998307191 | 0,01  | 0,994137877 | -0,1  | 0,923258105 | -0,14 | 0,810891431 | -0,03 | 0,982813638 |
| Gm13530 | 0,18  | 0,77354475  | -0,18 | 0,740759095 | 0     | 0,997581017 | 0,26  | 0,48505774  | 0,03  | 0,969617491 |
| Gm13539 | 0,24  | 0,603330883 | -0,12 | 0,801259805 | -0,02 | 0,987563007 | 0,07  | 0,868680052 | -0,14 | 0,864764763 |
| Gm13544 | -0,04 | 0,966775766 | -0,14 | 0,812432185 | -0,17 | 0,779486228 | -0,02 | 0,968311421 | -0,13 | 0,864166878 |
| Gm13546 | -0,17 | 0,832756958 | 0,01  | 0,998513452 | -0,12 | 0,922318683 | 0,27  | 0,477211575 | -0,05 | 0,946463658 |
| Gm13547 | 0,24  | 0,600680579 | -0,47 | 0,514683597 | 0,25  | 0,614237718 | 0,81  | 0,165050366 | -0,02 | 0,983617617 |
| Gm13553 | 0,12  | 0,777284597 | 0,13  | 0,863347936 | -0,11 | 0,856636502 | -0,08 | 0,868948312 | 0,07  | 0,925858284 |
| Gm13558 | -0,05 | 0,959985598 | -0,02 | 0,994137877 | -0,01 | 0,994130625 | -0,31 | 0,468239117 | -0,02 | 0,982718    |
| Gm13561 | -0,01 | 0,995482647 | 0,16  | 0,823530278 | -0,25 | 0,772397144 | 0,07  | 0,923775458 | -0,18 | 0,845218636 |
| Gm13562 | -0,03 | 0,959985598 | 0,05  | 0,940955502 | 0,49  | 0,387616846 | 0,03  | 0,950998017 | -0,14 | 0,874699689 |
| Gm13571 | 0,37  | 0,673291416 | 0,26  | 0,883843639 | 0,04  | 0,976042637 | -0,49 | 0,628879523 | -0,44 | 0,623852053 |
| Gm13572 | 0,1   | 0,813853666 | 0,01  | 0,990380046 | -0,05 | 0,942549395 | 0,01  | 0,977595722 | 0,09  | 0,906338603 |
| Gm13575 | 0,14  | 0,762165257 | -0,06 | 0,928134372 | -0,07 | 0,930398853 | 0,31  | 0,445595285 | 0,21  | 0,758160521 |
| Gm13580 | -0,1  | 0,908527886 | 0,47  | 0,817367084 | -0,14 | 0,811480974 | -0,39 | 0,795911056 | 0,07  | 0,925744028 |
| Gm13582 | 0,45  | 0,205244362 | -0,32 | 0,605851161 | -0,16 | 0,809023267 | -0,55 | 0,29760789  | -0,53 | 0,454357813 |
| Gm13583 | -0,13 | 0,913425276 | 0,21  | 0,843162191 | -0,19 | 0,832412808 | -0,04 | 0,967866794 | 0,29  | 0,738784191 |
| Gm13584 | -0,09 | 0,883130741 | -0,01 | 0,987282412 | -0,27 | 0,61483831  | -0,02 | 0,972821945 | 0,34  | 0,54819971  |
| Gm13598 | -0,12 | 0,783068584 | -0,2  | 0,666285906 | -0,21 | 0,806417365 | 0,29  | 0,789516436 | -0,1  | 0,942402665 |
| Gm13599 | 0,19  | 0,691111942 | -0,24 | 0,781665479 | -0,21 | 0,846975965 | -0,36 | 0,5651707   | 0,08  | 0,948759136 |
| Gm136   | 0     | 0,999075529 | 0,13  | 0,76325936  | 0,06  | 0,943019545 | -0,15 | 0,822355466 | 0,14  | 0,863544853 |
| Gm13601 | -0,05 | 0,940051958 | -0,29 | 0,591305258 | 0,08  | 0,908390194 | 0,13  | 0,735296131 | -0,13 | 0,839824817 |
| Gm13605 | 0,15  | 0,775122619 | 0,17  | 0,704846734 | 0,1   | 0,885263358 | -0,08 | 0,876190234 | 0,11  | 0,894114383 |
| Gm13609 | -0,13 | 0,802029256 | -0,03 | 0,961139695 | 0     | 0,998479176 | -0,02 | 0,972244785 | -0,04 | 0,96738578  |
| Gm13610 | -0,11 | 0,801627644 | -0,2  | 0,665268677 | -0,16 | 0,731438246 | 0,3   | 0,519885741 | 0,16  | 0,822709063 |
| Gm13629 | 0,18  | 0,728539265 | 0,11  | 0,893154668 | -0,05 | 0,940489823 | 0,2   | 0,778817721 | -0,1  | 0,927536545 |

|         |       |             |       |             |       |             |       |             |       |             |
|---------|-------|-------------|-------|-------------|-------|-------------|-------|-------------|-------|-------------|
| Gm13630 | 0,11  | 0,938938073 | -0,12 | 0,851085879 | -0,13 | 0,873457545 | -0,03 | 0,975040952 | 0,08  | 0,934242963 |
| Gm13648 | 0,19  | 0,750634506 | -0,14 | 0,83389171  | -0,06 | 0,94950841  | -0,19 | 0,653745483 | -0,01 | 0,994270272 |
| Gm13652 | -0,26 | 0,799145501 | 0,08  | 0,905517116 | 0,5   | 0,541296354 | -0,12 | 0,924110762 | 0,02  | 0,984065984 |
| Gm13657 | -0,16 | 0,713856222 | 0,47  | 0,586947068 | -0,08 | 0,887998113 | -0,89 | 0,178931682 | -0,28 | 0,757268602 |
| Gm13660 | -0,41 | 0,430696208 | -0,76 | 0,443318093 | -0,03 | 0,974628464 | 0,32  | 0,444591744 | 0,14  | 0,875713596 |
| Gm13662 | 0,43  | 0,692490424 | -0,18 | 0,745130453 | 0,12  | 0,83818796  | -0,08 | 0,828125777 | -0,12 | 0,879072575 |
| Gm13707 | 0,1   | 0,851207422 | -0,19 | 0,707524747 | -0,6  | 0,671222427 | 0,42  | 0,598856292 | 0,05  | 0,976743304 |
| Gm13709 | 0,26  | 0,537345693 | 0,07  | 0,882847123 | -0,17 | 0,779486228 | -0,04 | 0,943864463 | 0,15  | 0,855040243 |
| Gm13715 | 0,26  | 0,892823025 | -1,33 | 0,106507377 | 0,33  | 0,686445123 | 0,99  | 0,159190886 | 0,42  | 0,72393858  |
| Gm13749 | -0,02 | 0,973255755 | 0,07  | 0,881468748 | -0,11 | 0,897233315 | 0,28  | 0,373645618 | 0,2   | 0,709995567 |
| Gm13752 | -0,11 | 0,843924001 | 0,12  | 0,956049982 | 0,1   | 0,85004639  | 0,33  | 0,717400816 | 0,42  | 0,558284622 |
| Gm13777 | 0,1   | 0,843661553 | -0,02 | 0,977107705 | -0,23 | 0,652091831 | 0,43  | 0,166170594 | 0,06  | 0,940092696 |
| Gm13782 | -0,13 | 0,803761785 | -0,03 | 0,946599376 | -0,11 | 0,846296601 | 0,03  | 0,93504177  | 0,03  | 0,972590168 |
| Gm13790 | 0,14  | 0,898912077 | -0,29 | 0,861226791 | -0,08 | 0,965656549 | 0,54  | 0,327845122 | 0,62  | 0,316401979 |
| Gm13794 | 0,5   | 0,318118201 | 0,11  | 0,878755752 | 0,24  | 0,729861424 | 0,4   | 0,445374952 | 0,06  | 0,953297732 |
| Gm13799 | 0,26  | 0,641357042 | 0,25  | 0,611052267 | 0,02  | 0,983189886 | -0,21 | 0,658373543 | -0,05 | 0,947559952 |
| Gm13807 | 0,02  | 0,983663467 | -0,03 | 0,992383215 | 0,24  | 0,767029407 | -0,27 | 0,439829003 | -0,3  | 0,68987325  |
| Gm13837 | 0,29  | 0,649737285 | 0,21  | 0,781046971 | -0,03 | 0,973802765 | -0,04 | 0,938689944 | -0,06 | 0,937446198 |
| Gm13840 | 0,41  | 0,614250688 | -0,1  | 0,855607772 | -0,36 | 0,708876309 | -0,09 | 0,928002892 | 0,01  | 0,995722775 |
| Gm13848 | 0,09  | 0,902861556 | 0,01  | 0,997344247 | -0,13 | 0,894018349 | 0,11  | 0,9274274   | 0,31  | 0,822628064 |
| Gm13853 | 0,27  | 0,568455852 | -0,07 | 0,881171171 | -0,14 | 0,807521381 | -0,04 | 0,935277746 | -0,06 | 0,948163009 |
| Gm13856 | -0,01 | 0,989425214 | -0,35 | 0,819802664 | -0,02 | 0,981082114 | -0,21 | 0,661916932 | -0,03 | 0,979456872 |
| Gm13861 | 0,05  | 0,970154743 | -0,15 | 0,781665479 | -0,12 | 0,856046789 | -1,9  | 0,052722715 | -1,24 | 0,195453656 |
| Gm13869 | 0,07  | 0,888171916 | 0,19  | 0,80729797  | 0,02  | 0,985817024 | 0,1   | 0,899335603 | 0,22  | 0,731865047 |
| Gm13889 | -0,17 | 0,77761827  | -0,09 | 0,908395059 | 0,65  | 0,375777962 | -0,81 | 0,089063754 | -0,43 | 0,374616846 |
| Gm13912 | 0,23  | 0,7354177   | 0,1   | 0,838450577 | -0,1  | 0,877115707 | -0,18 | 0,726040578 | 0,18  | 0,819072786 |
| Gm13920 | 0,38  | 0,520545783 | -0,34 | 0,600177044 | -0,42 | 0,501664412 | 0,1   | 0,907539958 | 0,07  | 0,939258449 |
| Gm13923 | 0,05  | 0,932531737 | 0,06  | 0,910013125 | -0,12 | 0,8554698   | -0,01 | 0,990868391 | 0,11  | 0,876666201 |
| Gm13941 | -0,43 | 0,728098709 | -0,09 | 0,974159037 | -0,08 | 0,925417014 | -0,37 | 0,853014417 | -0,11 | 0,960774794 |
| Gm13944 | 0,27  | 0,66331039  | -0,03 | 0,991274777 | -0,21 | 0,719216409 | 0,39  | 0,468765073 | 0,85  | 0,319597889 |
| Gm13964 | 0,28  | 0,600952042 | 0,42  | 0,651587568 | 0,22  | 0,751732455 | -0,14 | 0,674657338 | 0     | 0,998704075 |
| Gm13974 | -0,05 | 0,966775766 | -0,98 | 0,275147283 | -0,17 | 0,797165207 | -0,25 | 0,853470813 | -0,41 | 0,769833756 |
| Gm13982 | 0,26  | 0,710325158 | 0,15  | 0,767579248 | 0,19  | 0,744336237 | 0,35  | 0,418470406 | 0,48  | 0,3848406   |
| Gm13985 | 0,21  | 0,614842736 | 0,03  | 0,948441665 | 0     | 0,997394645 | 0,03  | 0,952356771 | -0,04 | 0,966215583 |
| Gm13986 | 0,39  | 0,61200942  | 0,19  | 0,738499334 | 0,15  | 0,870377336 | 0,32  | 0,445282198 | -0,53 | 0,32673984  |

|         |       |             |       |             |       |             |       |             |       |             |
|---------|-------|-------------|-------|-------------|-------|-------------|-------|-------------|-------|-------------|
| Gm13990 | 0,35  | 0,315605749 | 0,01  | 0,999395995 | -0,14 | 0,830514771 | -0,03 | 0,962542094 | 0,15  | 0,861604824 |
| Gm13999 | 0,27  | 0,699829947 | 0,07  | 0,900801202 | 0,04  | 0,963551811 | -0,26 | 0,699906369 | 0,16  | 0,883791272 |
| Gm14005 | -0,12 | 0,852358078 | -0,27 | 0,615288453 | 0,26  | 0,647928093 | 2,61  | 0,022522121 | -0,5  | 0,650292523 |
| Gm14009 | 0,56  | 0,745283472 | 0,01  | 0,999395995 | 0,23  | 0,737821076 | 1,95  | 0,04172436  | 0,73  | 0,593599703 |
| Gm14010 | 0,21  | 0,717407143 | 0,16  | 0,732847182 | -0,27 | 0,614237718 | -0,02 | 0,982744094 | -0,26 | 0,800249058 |
| Gm14015 | 0,18  | 0,741974321 | -0,11 | 0,861905894 | -0,09 | 0,931644705 | 0,24  | 0,711963811 | 0,27  | 0,617234477 |
| Gm14023 | 0,01  | 0,995583843 | 0,34  | 0,649067803 | -0,04 | 0,973802765 | -0,44 | 0,349260433 | -0,24 | 0,735737121 |
| Gm14025 | 0,36  | 0,577119949 | 0,44  | 0,367968212 | -0,14 | 0,830820153 | -0,38 | 0,373655368 | -0,13 | 0,861604824 |
| Gm14040 | 0,1   | 0,858269816 | -0,03 | 0,96172404  | -0,11 | 0,841563482 | 0,17  | 0,855041248 | 0,17  | 0,856534656 |
| Gm14041 | -0,12 | 0,824044892 | 0,05  | 0,948016298 | -0,24 | 0,67264966  | -0,08 | 0,817972323 | 0,03  | 0,978972169 |
| Gm14051 | -0,01 | 0,993175772 | -0,05 | 0,940161762 | -0,09 | 0,898684568 | 0,04  | 0,921063977 | 0,73  | 0,363378859 |
| Gm14055 | 0,21  | 0,841492942 | 0,24  | 0,712978147 | -0,28 | 0,543542033 | -0,01 | 0,981394554 | 0,14  | 0,879072575 |
| Gm14057 | 0,28  | 0,701624105 | -0,46 | 0,451300267 | 0,22  | 0,841669036 | 0,56  | 0,383914763 | -0,23 | 0,861977667 |
| Gm14061 | 0,08  | 0,911404262 | 0     | 0,999438768 | 0,2   | 0,834522299 | -0,18 | 0,688800416 | 0,09  | 0,911685487 |
| Gm14062 | -0,06 | 0,934482351 | 0,19  | 0,664787536 | -0,15 | 0,777417583 | -0,06 | 0,884460621 | 0,08  | 0,917356423 |
| Gm14085 | 0,71  | 0,212784334 | -0,29 | 0,916496897 | -0,09 | 0,926779779 | -0,42 | 0,768796094 | -0,53 | 0,715879151 |
| Gm14089 | -0,09 | 0,860985365 | 0,02  | 0,975103597 | 0,04  | 0,950052494 | 0,14  | 0,806939625 | 0,08  | 0,932521789 |
| Gm14092 | -0,01 | 0,996219097 | -0,14 | 0,89545828  | -0,21 | 0,733092626 | -0,61 | 0,501971846 | -0,16 | 0,817563348 |
| Gm14114 | 0,32  | 0,45143667  | 0,08  | 0,869024111 | -0,07 | 0,927301763 | 0,05  | 0,89953888  | 0,1   | 0,893737959 |
| Gm14123 | 0,32  | 0,560461791 | 0,48  | 0,483998954 | -0,1  | 0,877366773 | 0,08  | 0,837974367 | 0,17  | 0,780761723 |
| Gm14124 | 0,18  | 0,665821492 | -0,16 | 0,759198741 | 0,07  | 0,927950027 | -0,06 | 0,916455982 | 0,11  | 0,885872093 |
| Gm14133 | 0,12  | 0,869225685 | 0,12  | 0,856132795 | 0,02  | 0,987156456 | -0,02 | 0,981610833 | -0,27 | 0,745134899 |
| Gm14137 | 0,07  | 0,897717279 | -0,01 | 0,99176567  | 0,24  | 0,761861872 | 1,15  | 0,06195481  | -0,1  | 0,927536545 |
| Gm14139 | -0,05 | 0,925510521 | 0,12  | 0,807175471 | 0,25  | 0,646044979 | -0,19 | 0,748489177 | 0,02  | 0,983300881 |
| Gm14147 | 0,18  | 0,701624105 | 0,07  | 0,928134372 | -0,31 | 0,593455611 | -0,35 | 0,314856134 | -0,09 | 0,898309858 |
| Gm14149 | 0,27  | 0,652819827 | -0,08 | 0,955302758 | -0,21 | 0,834464659 | 0,04  | 0,953222061 | -0,24 | 0,699060093 |
| Gm14151 | 0,25  | 0,652819827 | 0     | 0,997283484 | 0,01  | 0,987834421 | 0,29  | 0,743170266 | 0,39  | 0,708898543 |
| Gm14154 | 0,23  | 0,609225855 | -0,43 | 0,305866517 | 0,1   | 0,936106999 | -0,13 | 0,736062864 | -0,02 | 0,99004065  |
| Gm14164 | 0,04  | 0,976965483 | -0,29 | 0,685177845 | 0,09  | 0,930673542 | -0,25 | 0,645781937 | 0,13  | 0,909024113 |
| Gm14167 | 0,77  | 0,277313998 | 0,21  | 0,634920127 | -0,6  | 0,329911949 | -0,05 | 0,945086901 | -0,3  | 0,773401088 |
| Gm14168 | -0,05 | 0,94727537  | 0,17  | 0,793276792 | 0,07  | 0,933242192 | -0,14 | 0,726007461 | -0,18 | 0,838679773 |
| Gm14169 | -0,14 | 0,801665973 | 0,05  | 0,965147491 | -0,28 | 0,542385406 | 0,41  | 0,242691189 | 0,05  | 0,956702425 |
| Gm14204 | 0,14  | 0,803761785 | 0,43  | 0,65781834  | -0,18 | 0,824682741 | -0,03 | 0,940891309 | 0,18  | 0,773503402 |
| Gm14207 | 0,09  | 0,862160773 | -0,02 | 0,990052916 | -0,1  | 0,897233315 | -0,12 | 0,768236902 | -0,54 | 0,581046085 |
| Gm14210 | 0,18  | 0,678857468 | -0,54 | 0,597889757 | -0,21 | 0,743001036 | 0,52  | 0,398422441 | 0,12  | 0,861763071 |



|         |       |             |       |             |       |             |       |             |       |             |
|---------|-------|-------------|-------|-------------|-------|-------------|-------|-------------|-------|-------------|
| Gm14230 | -0,48 | 0,705284533 | -0,39 | 0,708684603 | 0,25  | 0,930193129 | -0,24 | 0,757938082 | -0,75 | 0,45731544  |
| Gm14243 | -0,09 | 0,8634587   | 0,08  | 0,883145635 | -0,02 | 0,990836784 | -0,24 | 0,4729993   | -0,59 | 0,2848182   |
| Gm14244 | 0,06  | 0,909885273 | 0,44  | 0,541469535 | 0,17  | 0,839096359 | 0,27  | 0,482526814 | 0,31  | 0,59928758  |
| Gm14261 | 0,17  | 0,799477555 | -0,1  | 0,849473761 | 0,07  | 0,914134206 | 0,09  | 0,831252023 | 0,01  | 0,9939542   |
| Gm14264 | 0,05  | 0,943079514 | -0,19 | 0,763005394 | -0,01 | 0,996260936 | -0,03 | 0,939730251 | -0,07 | 0,919058983 |
| Gm14273 | 0,08  | 0,919110324 | -0,14 | 0,90795932  | 0,03  | 0,976042637 | 0,37  | 0,439173785 | -0,22 | 0,775441452 |
| Gm14285 | 0,1   | 0,844688163 | 0,14  | 0,80000598  | 0,08  | 0,917694073 | 0,12  | 0,863346533 | -0,38 | 0,575543402 |
| Gm14286 | 0,69  | 0,520448711 | -0,05 | 0,95429671  | -0,48 | 0,72592653  | 0,79  | 0,048984797 | -0,01 | 0,994270272 |
| Gm14295 | -0,38 | 0,731173847 | -0,33 | 0,701492683 | 0,21  | 0,886000685 | 0,07  | 0,924578858 | 0,27  | 0,694233384 |
| Gm14317 | -0,16 | 0,69654479  | -0,37 | 0,644818618 | 0,25  | 0,760679785 | 0     | 1           | -0,07 | 0,939448119 |
| Gm14322 | -0,67 | 0,488619512 | -0,34 | 0,694422914 | -0,1  | 0,946627221 | -0,34 | 0,821845191 | -0,73 | 0,669861917 |
| Gm14327 | 0,28  | 0,728070448 | 0,47  | 0,782652703 | -0,37 | 0,636357295 | -0,11 | 0,923647321 | 0,62  | 0,360718516 |
| Gm14340 | 0,17  | 0,656095444 | -0,11 | 0,884226482 | -0,03 | 0,972393195 | 0,1   | 0,814762053 | 0,14  | 0,832736649 |
| Gm14342 | -0,05 | 0,939858259 | -0,12 | 0,881113709 | 0,06  | 0,932600584 | 0,1   | 0,903127806 | 0,15  | 0,873651528 |
| Gm14372 | -0,11 | 0,90742841  | 0,18  | 0,727964379 | 0,34  | 0,543291636 | 0,02  | 0,965653854 | -0,2  | 0,776286347 |
| Gm14377 | -0,06 | 0,911800803 | 0,04  | 0,969536025 | -0,02 | 0,992972594 | -0,27 | 0,697342735 | -0,56 | 0,362275161 |
| Gm14379 | 0,19  | 0,795659022 | 0,09  | 0,936502479 | -0,02 | 0,987003605 | -0,79 | 0,177107762 | 0,13  | 0,892505022 |
| Gm14391 | -0,44 | 0,689432651 | -0,66 | 0,565639972 | 0,2   | 0,762651086 | -0,22 | 0,817029982 | 0,19  | 0,830086988 |
| Gm14403 | -0,29 | 0,797266879 | -0,67 | 0,508633526 | 0,27  | 0,727962313 | 0,56  | 0,476284901 | -0,28 | 0,817338498 |
| Gm14405 | 0,15  | 0,808947569 | 0,08  | 0,857408462 | 0,06  | 0,954453764 | 0,15  | 0,761222674 | 0,18  | 0,763240477 |
| Gm14408 | -0,79 | 0,464825261 | 0,34  | 0,843493142 | 1,99  | 0,108206799 | -0,37 | 0,488026149 | 0,25  | 0,836714697 |
| Gm14409 | -0,05 | 0,959218841 | 0,02  | 0,979002922 | -0,11 | 0,879041474 | -0,06 | 0,879005234 | 0,04  | 0,96596348  |
| Gm14410 | 0,23  | 0,654203085 | -0,01 | 0,99305294  | -0,02 | 0,982305856 | -0,18 | 0,747003908 | 0,02  | 0,985269236 |
| Gm14420 | -0,25 | 0,571734562 | 0,13  | 0,892916262 | -0,27 | 0,830820153 | -0,99 | 0,25955285  | 0,04  | 0,979456872 |
| Gm14437 | 0,32  | 0,538954885 | -0,18 | 0,785153081 | -0,01 | 0,996459345 | -0,2  | 0,676010477 | 0,19  | 0,823098095 |
| Gm14440 | -0,26 | 0,846336153 | -0,8  | 0,492900462 | -0,75 | 0,263492262 | -0,77 | 0,397797098 | 0,07  | 0,969466846 |
| Gm14459 | -0,04 | 0,95290436  | 0,01  | 0,994390365 | -0,08 | 0,93262999  | 0,26  | 0,535672313 | 0,24  | 0,669611671 |
| Gm14461 | 0,51  | 0,242651292 | 0,5   | 0,412008994 | 0,03  | 0,967930981 | -0,4  | 0,389537699 | -0,06 | 0,952971656 |
| Gm14486 | 0,18  | 0,87774325  | 0,09  | 0,916042399 | -0,15 | 0,890475515 | -0,21 | 0,627089222 | 0,1   | 0,917779543 |
| Gm14487 | 0,23  | 0,760872819 | -0,01 | 0,995205602 | 0,23  | 0,661089127 | -0,09 | 0,909873635 | 0     | 0,997856047 |
| Gm14488 | -0,2  | 0,796387367 | 0,14  | 0,868462743 | 0,21  | 0,711135497 | 0,56  | 0,215252719 | -0,38 | 0,581626555 |
| Gm14496 | -0,35 | 0,505856084 | 0,16  | 0,781665479 | -0,18 | 0,709885771 | -0,41 | 0,586502183 | -0,33 | 0,753963546 |
| Gm14517 | -0,08 | 0,864400092 | -0,02 | 0,974580396 | -0,13 | 0,809062815 | 0,17  | 0,62736758  | 0,12  | 0,854369491 |
| Gm14532 | 0,06  | 0,897717279 | 0,11  | 0,891055462 | -0,22 | 0,625295543 | -0,17 | 0,722766722 | 0,17  | 0,905581898 |
| Gm14546 | 0,19  | 0,690470287 | 0,03  | 0,958856577 | -0,07 | 0,938322304 | -0,02 | 0,95852873  | 0,01  | 0,984125319 |

|         |       |             |       |             |       |             |       |             |       |             |
|---------|-------|-------------|-------|-------------|-------|-------------|-------|-------------|-------|-------------|
| Gm14569 | -0,39 | 0,459326003 | 0,1   | 0,89081665  | -0,08 | 0,944078985 | 0,24  | 0,762847486 | 0,25  | 0,679810349 |
| Gm14582 | 0,12  | 0,818182081 | 0,23  | 0,666450149 | 0,11  | 0,87140695  | -0,01 | 0,989314626 | 0,06  | 0,942285623 |
| Gm14616 | -0,01 | 0,996907585 | 0,19  | 0,678839377 | 0,24  | 0,67035251  | 0,26  | 0,718462283 | 0,06  | 0,962987169 |
| Gm14634 | 0     | 0,997285684 | -0,19 | 0,737385437 | 0,01  | 0,994008884 | 0,24  | 0,744107161 | 0,35  | 0,643686338 |
| Gm14635 | 0,1   | 0,886733721 | 0,05  | 0,934438798 | -0,29 | 0,59755586  | -0,07 | 0,916072825 | -0,06 | 0,964656667 |
| Gm14636 | 1,12  | 0,067204873 | 0,63  | 0,319462466 | -0,16 | 0,926667299 | 0,55  | 0,12170775  | 0,89  | 0,118887411 |
| Gm14637 | 0,04  | 0,943538971 | 0,06  | 0,923044405 | -0,16 | 0,785676028 | 0,05  | 0,908872561 | 0,18  | 0,763240477 |
| Gm14642 | 0,23  | 0,724502628 | 0,05  | 0,918041124 | 0,04  | 0,969262382 | -0,25 | 0,744107161 | -0,19 | 0,873651528 |
| Gm14661 | 0,06  | 0,960248919 | 0,08  | 0,927205716 | -0,04 | 0,949912807 | -0,07 | 0,929835301 | -0,12 | 0,900126162 |
| Gm14664 | 0,16  | 0,717407143 | 0,06  | 0,912535732 | -0,02 | 0,976138805 | -0,26 | 0,406029112 | -0,11 | 0,865938897 |
| Gm14696 | 0,32  | 0,565823399 | 0,1   | 0,914962572 | -0,17 | 0,784775459 | 0,28  | 0,499022095 | 0,17  | 0,780906047 |
| Gm14703 | 0,31  | 0,794588318 | 0,37  | 0,482507034 | -0,29 | 0,749585107 | -0,16 | 0,710417715 | -0,04 | 0,969617491 |
| Gm14718 | -0,06 | 0,934588784 | -0,27 | 0,748874675 | 0,14  | 0,792677881 | -0,12 | 0,793134304 | -0,15 | 0,876719251 |
| Gm14719 | -0,17 | 0,721512947 | -0,59 | 0,334769294 | 0,05  | 0,952590118 | -0,62 | 0,202855761 | -0,61 | 0,272652221 |
| Gm14743 | 0,01  | 0,993728727 | 0,1   | 0,861862086 | -0,08 | 0,926365431 | -0,02 | 0,971338071 | 0,26  | 0,730289864 |
| Gm14744 | -0,12 | 0,911399028 | 0,21  | 0,814896288 | -0,34 | 0,57717258  | 0,2   | 0,690978577 | 0,25  | 0,71154262  |
| Gm14762 | 0,08  | 0,888366049 | 0,07  | 0,89081665  | -0,11 | 0,886832708 | -0,01 | 0,985865561 | 0,04  | 0,968038677 |
| Gm14781 | 0,33  | 0,444733751 | -0,22 | 0,89545828  | 0,38  | 0,478282425 | 0,59  | 0,37252791  | 0,43  | 0,651512737 |
| Gm14808 | 0,19  | 0,778869381 | 0,29  | 0,72274107  | -0,51 | 0,30134516  | -0,01 | 0,989926105 | 0,16  | 0,799199452 |
| Gm14809 | -0,13 | 0,906885053 | 0,01  | 0,994390365 | -0,3  | 0,599202081 | -0,06 | 0,900691702 | -0,31 | 0,673120647 |
| Gm14812 | 0,3   | 0,464825261 | 0,25  | 0,862430716 | -0,28 | 0,830541787 | -0,44 | 0,154932535 | -0,18 | 0,761782208 |
| Gm14827 | 0,07  | 0,902628825 | -0,03 | 0,961709816 | -0,21 | 0,739735408 | -0,27 | 0,396899362 | -0,04 | 0,960974478 |
| Gm14851 | 0,04  | 0,958188047 | 0,05  | 0,930192503 | -0,05 | 0,935887545 | -0,05 | 0,9274274   | 0,1   | 0,899597352 |
| Gm14858 | 0,17  | 0,779331628 | -0,36 | 0,641804702 | 0,23  | 0,64044157  | 0,29  | 0,400786517 | 0,02  | 0,986720141 |
| Gm14866 | 0,59  | 0,247531815 | 0,42  | 0,581054206 | 0,22  | 0,822658666 | -0,32 | 0,547488179 | 0,35  | 0,568868543 |
| Gm14902 | 0,26  | 0,689253784 | 0,04  | 0,978904487 | 0,16  | 0,824460336 | 0,18  | 0,899335603 | -0,11 | 0,939930189 |
| Gm14920 | 0,01  | 0,984040323 | -0,09 | 0,839789639 | -0,12 | 0,850258511 | 0,12  | 0,83687014  | -0,19 | 0,818825401 |
| Gm14936 | -0,08 | 0,922118639 | 0,21  | 0,6547161   | 0,12  | 0,841942589 | -0,27 | 0,522511755 | 0,08  | 0,953536226 |
| Gm14964 | -0,02 | 0,978017159 | 0,02  | 0,9759335   | -0,15 | 0,899459444 | -0,22 | 0,537579111 | -0,02 | 0,984125319 |
| Gm15008 | -0,04 | 0,94881239  | -0,28 | 0,501438027 | 0,11  | 0,926183194 | 0,04  | 0,949755    | -0,01 | 0,991980521 |
| Gm15032 | -0,13 | 0,832696131 | 0,29  | 0,553012845 | -0,33 | 0,550662565 | 0,4   | 0,291158594 | 0,16  | 0,870978345 |
| Gm15050 | -0,31 | 0,491641812 | 0,24  | 0,663652994 | 0,12  | 0,888101179 | 0,32  | 0,411109724 | -0,01 | 0,991980521 |
| Gm15056 | -0,11 | 0,813460438 | -0,43 | 0,818072947 | -0,37 | 0,678840444 | 0,15  | 0,828361053 | 0,12  | 0,92577365  |
| Gm15063 | -0,37 | 0,72711401  | -0,08 | 0,930131797 | -0,17 | 0,887782273 | 0,21  | 0,696772872 | -0,04 | 0,961749007 |
| Gm15083 | 0,01  | 0,996998625 | 0,34  | 0,629397507 | -0,39 | 0,576592414 | -0,12 | 0,741452902 | 0,21  | 0,763240477 |

|         |       |             |       |             |       |             |       |             |       |             |
|---------|-------|-------------|-------|-------------|-------|-------------|-------|-------------|-------|-------------|
| Gm15091 | -0,55 | 0,495249753 | -0,36 | 0,609791675 | -0,04 | 0,967930981 | 1     | 0,076348362 | 0,23  | 0,775103985 |
| Gm15104 | 0,01  | 0,983516046 | 0,15  | 0,876351697 | -0,04 | 0,956894731 | 0,15  | 0,697953188 | -0,01 | 0,991071486 |
| Gm15127 | -0,51 | 0,388432897 | 0,07  | 0,935329426 | 0,09  | 0,915321116 | -0,16 | 0,835223942 | -0,24 | 0,754898455 |
| Gm15128 | 0,31  | 0,668964087 | -0,24 | 0,864363741 | -0,09 | 0,89402623  | -0,27 | 0,646131191 | -0,08 | 0,950267521 |
| Gm15133 | 0,86  | 0,485159825 | 0,21  | 0,853569707 | -0,77 | 0,215429632 | -0,82 | 0,131084724 | 1,81  | 0,072903416 |
| Gm15140 | 0,6   | 0,197636424 | -0,09 | 0,886286684 | 0,45  | 0,730738549 | -0,09 | 0,91689117  | -0,26 | 0,6754671   |
| Gm15155 | -0,19 | 0,832696131 | -0,59 | 0,467853942 | -0,2  | 0,837156771 | -0,06 | 0,943508556 | -0,22 | 0,799803346 |
| Gm15169 | -0,05 | 0,933253663 | 0,12  | 0,857388191 | -0,11 | 0,88090061  | 0,13  | 0,780417655 | 0,3   | 0,694233384 |
| Gm15179 | 0,27  | 0,549437855 | -0,23 | 0,782652703 | -0,06 | 0,95106142  | 0,23  | 0,737366847 | -0,15 | 0,869113953 |
| Gm15199 | 1,02  | 0,132709492 | 0,44  | 0,666450149 | 0,47  | 0,591228704 | 0,62  | 0,465446267 | 0,98  | 0,193796626 |
| Gm15201 | 0,09  | 0,858750474 | 0,21  | 0,677981098 | 0,14  | 0,789802954 | 0,04  | 0,959921588 | -0,19 | 0,812736371 |
| Gm15205 | -0,34 | 0,430723846 | 0,18  | 0,764448656 | 0,25  | 0,66225859  | -0,04 | 0,954118959 | 0,1   | 0,910301996 |
| Gm15217 | 0,29  | 0,656726345 | -0,47 | 0,561928606 | -0,26 | 0,785676028 | -0,02 | 0,988205241 | 0,22  | 0,777805633 |
| Gm15228 | -0,01 | 0,992045436 | 0,2   | 0,655345408 | 0,02  | 0,976522658 | -0,07 | 0,903739255 | 0,02  | 0,981439632 |
| Gm15230 | 0     | 0,997645768 | 0,13  | 0,942593581 | 0,16  | 0,85653581  | 0,02  | 0,993646757 | 0,27  | 0,823098095 |
| Gm15232 | -0,28 | 0,624481073 | -0,01 | 0,995205602 | -0,28 | 0,59973428  | 0,13  | 0,817794705 | 0,31  | 0,68601056  |
| Gm15234 | 0,02  | 0,974237277 | 0,1   | 0,855632384 | 0,16  | 0,825782434 | 0,19  | 0,683774467 | -0,19 | 0,731527639 |
| Gm15239 | 0,11  | 0,824639882 | -0,09 | 0,87464113  | -0,27 | 0,571082984 | 0,01  | 0,988205241 | -0,02 | 0,979456872 |
| Gm15245 | 0,15  | 0,783200207 | 0,25  | 0,716668427 | 0,12  | 0,825914825 | -0,01 | 0,980724248 | 0,27  | 0,689582775 |
| Gm15246 | 0,11  | 0,976574175 | -0,01 | 0,994735911 | 1,12  | 0,337509636 | -0,65 | 0,127302567 | -0,1  | 0,893225952 |
| Gm15247 | -0,34 | 0,537402009 | 0,33  | 0,458770201 | -0,43 | 0,700947699 | 0,14  | 0,797751859 | -0,03 | 0,977091548 |
| Gm15266 | 0,15  | 0,728539265 | 0,04  | 0,95021587  | -0,05 | 0,952366216 | 0,11  | 0,769374738 | 0,26  | 0,673287161 |
| Gm1527  | -0,04 | 0,966881942 | 0,05  | 0,975427696 | -0,16 | 0,836625711 | -0,12 | 0,878569859 | 0,32  | 0,758810523 |
| Gm15290 | 0     | 0,995165528 | -0,1  | 0,863268685 | 0,04  | 0,957209326 | 0,08  | 0,861140391 | 0,07  | 0,929780699 |
| Gm15293 | 0,36  | 0,407591936 | 0,23  | 0,740618526 | -0,31 | 0,647988621 | 0,23  | 0,757267334 | 0,24  | 0,825518917 |
| Gm15299 | 0     | 0,996219097 | -0,07 | 0,906267371 | 0     | 0,997689307 | -0,07 | 0,889515057 | 0,12  | 0,862867603 |
| Gm15315 | 0,03  | 0,960800881 | 0,05  | 0,956555856 | -0,16 | 0,838289412 | 0,07  | 0,854633145 | 0,12  | 0,859080411 |
| Gm15319 | 0,46  | 0,520948125 | 0,08  | 0,952427593 | -0,11 | 0,876687326 | -0,29 | 0,597299096 | -0,44 | 0,551819717 |
| Gm15322 | 0,11  | 0,850491134 | -0,02 | 0,977204386 | -0,27 | 0,63505086  | 0,11  | 0,788818065 | 0,02  | 0,982779069 |
| Gm15323 | 0,51  | 0,436759446 | 0,04  | 0,966078321 | -0,52 | 0,550662565 | -0,26 | 0,718816936 | 0,23  | 0,799638391 |
| Gm15325 | 0,18  | 0,64776317  | -0,02 | 0,987282412 | 0,13  | 0,838289412 | 0,22  | 0,591646397 | 0,15  | 0,810276195 |
| Gm15326 | -0,31 | 0,538001428 | 0,2   | 0,7122758   | -0,59 | 0,342804036 | -0,08 | 0,885417869 | -0,26 | 0,729208209 |
| Gm15327 | 0,06  | 0,954648978 | -0,08 | 0,968620079 | 0,02  | 0,991568687 | 0,21  | 0,665063395 | -0,12 | 0,869403669 |
| Gm15328 | -0,03 | 0,964124037 | -0,45 | 0,653492327 | 0,36  | 0,777210497 | 0,34  | 0,49823644  | -0,02 | 0,986971861 |
| Gm15337 | -0,25 | 0,569699675 | 0     | 1           | -0,37 | 0,462123525 | 0,04  | 0,943143586 | 0,23  | 0,68044046  |

|         |       |             |       |             |       |             |       |             |       |             |
|---------|-------|-------------|-------|-------------|-------|-------------|-------|-------------|-------|-------------|
| Gm15340 | 0,16  | 0,777139579 | 0,16  | 0,716668427 | -0,07 | 0,906301115 | -0,16 | 0,635869722 | 0,09  | 0,912250982 |
| Gm15341 | 0,05  | 0,95538722  | 0,04  | 0,935984823 | -0,13 | 0,862480223 | 0,14  | 0,748234235 | 0,17  | 0,827532593 |
| Gm15343 | -0,06 | 0,93113484  | 0,38  | 0,384442449 | -0,6  | 0,396123158 | -0,16 | 0,692059018 | 0,09  | 0,917844354 |
| Gm15346 | 0,01  | 0,982432452 | 0,17  | 0,693906911 | -0,11 | 0,850687949 | 0,01  | 0,987873913 | -0,03 | 0,973576804 |
| Gm15348 | 0,41  | 0,465168175 | 0,08  | 0,906678859 | 0,01  | 0,995237931 | 0,11  | 0,899335603 | 0     | 0,997254437 |
| Gm15350 | -0,02 | 0,971810805 | 0,12  | 0,857388191 | -0,05 | 0,969476711 | 0,09  | 0,855472984 | -0,08 | 0,918897359 |
| Gm15386 | -0,04 | 0,964154899 | -0,16 | 0,739601111 | 0,12  | 0,843957249 | -0,01 | 0,983166423 | 0,24  | 0,697818445 |
| Gm15389 | 0     | 0,999549745 | -0,15 | 0,703291096 | -0,04 | 0,957963503 | 0,22  | 0,561130996 | 0,15  | 0,827741398 |
| Gm15395 | 0,15  | 0,797276781 | 0,02  | 0,982378957 | 0,27  | 0,579159818 | -0,42 | 0,242730241 | -0,03 | 0,97425848  |
| Gm15396 | 0,52  | 0,38092461  | -0,92 | 0,664787536 | 0,07  | 0,950052494 | 0,18  | 0,69558501  | -0,15 | 0,852853158 |
| Gm15401 | 0,23  | 0,807007142 | 0,33  | 0,808842286 | -0,42 | 0,503267519 | -0,2  | 0,715243994 | -0,47 | 0,414466684 |
| Gm15408 | -0,33 | 0,639346687 | -0,15 | 0,926716213 | -0,35 | 0,479824278 | -0,4  | 0,349309585 | -0,11 | 0,913274952 |
| Gm15411 | -0,02 | 0,989996539 | 0,05  | 0,919169439 | -0,29 | 0,800620895 | 0,2   | 0,514707371 | -0,33 | 0,594109073 |
| Gm15412 | 0,16  | 0,761832919 | -0,19 | 0,795850594 | -0,26 | 0,56948206  | 0,33  | 0,480288448 | 0,27  | 0,752187547 |
| Gm15413 | 0,19  | 0,707502054 | 0,21  | 0,862088357 | 0,11  | 0,905632058 | 0,03  | 0,970931237 | 0,18  | 0,801987865 |
| Gm15417 | -0,07 | 0,947474694 | -0,21 | 0,761986479 | 0,25  | 0,823396412 | -0,52 | 0,152938593 | -0,38 | 0,560985115 |
| Gm15418 | -0,02 | 0,987521146 | 0,2   | 0,882847123 | -0,17 | 0,783006    | -0,08 | 0,890274164 | -0,01 | 0,992022739 |
| Gm15420 | 0,1   | 0,827297612 | -0,24 | 0,624511355 | -0,31 | 0,645159648 | 0,29  | 0,433213913 | 0,14  | 0,868167014 |
| Gm15421 | -0,2  | 0,760032001 | -0,12 | 0,829923566 | -0,03 | 0,975055092 | -1,17 | 0,328472681 | 0,33  | 0,864373858 |
| Gm15423 | -0,2  | 0,683361997 | 0,74  | 0,450997698 | 0,09  | 0,87802359  | -0,72 | 0,115712956 | -0,15 | 0,836205142 |
| Gm15441 | -0,05 | 0,983174783 | 0,56  | 0,671319666 | 0,46  | 0,791504463 | -2,27 | 0,02663501  | 0,22  | 0,865866242 |
| Gm15446 | 0,46  | 0,531870009 | -0,12 | 0,927874511 | -0,64 | 0,135721222 | -0,8  | 0,041473356 | -1,2  | 0,021111626 |
| Gm15448 | -0,39 | 0,612774344 | -0,64 | 0,444058759 | 0,12  | 0,907436015 | -0,09 | 0,890879327 | -0,72 | 0,334365666 |
| Gm15471 | 0,8   | 0,247582979 | 1,64  | 0,094438943 | -0,45 | 0,430507107 | -1,31 | 0,045809254 | 1,73  | 0,375798469 |
| Gm15473 | 0,09  | 0,856118781 | 0,13  | 0,838738815 | -0,38 | 0,622546805 | -0,05 | 0,921929178 | 0,26  | 0,730289864 |
| Gm15478 | 0,15  | 0,727972319 | 0     | 1           | 0,04  | 0,966910505 | -0,05 | 0,916072825 | 0,12  | 0,852959745 |
| Gm15482 | 0,15  | 0,775296013 | 0     | 1           | -0,03 | 0,982244265 | 0,03  | 0,960944731 | 0,05  | 0,951429597 |
| Gm15486 | 0,35  | 0,629541289 | -0,05 | 0,965147491 | -0,11 | 0,936840991 | 0,09  | 0,917412637 | -0,23 | 0,831834722 |
| Gm15496 | -0,15 | 0,834886413 | 0,26  | 0,715348909 | -0,32 | 0,694206736 | 0,14  | 0,872899312 | 0,42  | 0,671222633 |
| Gm15498 | -0,15 | 0,76418341  | -0,07 | 0,885072868 | -0,28 | 0,60061447  | 0,2   | 0,62736758  | 0     | 0,997254437 |
| Gm15499 | 0,08  | 0,926515396 | 0,02  | 0,988548122 | -0,19 | 0,789802954 | 0,22  | 0,61110299  | 0,17  | 0,79336167  |
| Gm15506 | 0,38  | 0,387558354 | 0,11  | 0,847885195 | 0,15  | 0,906097666 | -0,43 | 0,483188822 | -0,39 | 0,62872947  |
| Gm15509 | 0,08  | 0,903817676 | 0,27  | 0,800821935 | -0,28 | 0,71018068  | 0,45  | 0,37252791  | 0     | 0,997876986 |
| Gm15510 | -0,02 | 0,966703421 | -0,03 | 0,972706967 | -0,11 | 0,847506224 | -0,14 | 0,799835488 | -0,1  | 0,909363599 |
| Gm15511 | 0,19  | 0,751534367 | 0,1   | 0,827468312 | -0,04 | 0,973732268 | 0,18  | 0,710855553 | 0,08  | 0,918797466 |

|         |       |             |       |             |       |             |       |             |       |             |
|---------|-------|-------------|-------|-------------|-------|-------------|-------|-------------|-------|-------------|
| Gm15520 | -0,07 | 0,915575695 | 0,41  | 0,299342025 | -0,44 | 0,491041757 | -0,18 | 0,721611115 | 0,11  | 0,885673683 |
| Gm15522 | 0,03  | 0,964124037 | -0,3  | 0,513975715 | -0,12 | 0,822325505 | 0,2   | 0,588987424 | -0,21 | 0,763240477 |
| Gm15523 | 0,22  | 0,698332739 | 0,01  | 0,98567435  | 0,31  | 0,566099777 | -0,12 | 0,759918031 | -0,16 | 0,794517953 |
| Gm15527 | -0,08 | 0,908513949 | 0,27  | 0,758491017 | -0,21 | 0,750874251 | -0,04 | 0,951697927 | 0,03  | 0,976743304 |
| Gm1553  | -0,14 | 0,761364679 | -0,12 | 0,781665479 | -0,29 | 0,558908463 | -0,11 | 0,807101657 | -0,15 | 0,817411893 |
| Gm15533 | 0,14  | 0,765328991 | 0,3   | 0,439108392 | 0,13  | 0,806102885 | -0,04 | 0,934635186 | 0,21  | 0,795326093 |
| Gm15541 | -0,12 | 0,872184851 | -0,27 | 0,74583457  | 0,24  | 0,706178361 | -0,89 | 0,164122466 | -0,59 | 0,456327568 |
| Gm15543 | 0,03  | 0,94916801  | 0,2   | 0,692139075 | -0,11 | 0,847597197 | -0,03 | 0,963999463 | 0,35  | 0,536721752 |
| Gm15545 | 0,03  | 0,979362045 | -0,38 | 0,520395205 | 0,15  | 0,909233941 | -0,02 | 0,983166423 | -0,31 | 0,634076489 |
| Gm15551 | 0,11  | 0,834672627 | -0,03 | 0,954343854 | -0,18 | 0,784775459 | 0,21  | 0,665334658 | 0,15  | 0,839474287 |
| Gm15555 | -0,2  | 0,766575514 | 0,56  | 0,521490557 | -0,14 | 0,849697489 | -0,58 | 0,412367944 | 0,08  | 0,949178165 |
| Gm15558 | 0,11  | 0,810308706 | 0,13  | 0,841184864 | 0,16  | 0,821593262 | 0,31  | 0,535965596 | 0,4   | 0,539071004 |
| Gm15559 | 0,06  | 0,963914207 | 0,26  | 0,628367076 | -0,04 | 0,955984004 | 0,14  | 0,76730825  | 0,01  | 0,991628025 |
| Gm15564 | 0,02  | 0,969010989 | -0,18 | 0,786405071 | -0,05 | 0,955263994 | -0,23 | 0,744405911 | -0,36 | 0,534171045 |
| Gm15577 | -0,04 | 0,939858259 | 0,05  | 0,949561659 | -0,07 | 0,930193129 | -0,07 | 0,927360713 | 0,24  | 0,713599145 |
| Gm15581 | -0,15 | 0,842292335 | -0,5  | 0,558135871 | -0,54 | 0,398389729 | -0,3  | 0,715821479 | -0,12 | 0,902802615 |
| Gm15597 | -0,07 | 0,89512367  | 0,03  | 0,96595089  | -0,03 | 0,973641476 | -0,24 | 0,5859782   | 0,3   | 0,74732051  |
| Gm156   | 0,03  | 0,969486005 | 0,15  | 0,860142618 | -0,04 | 0,95443379  | 0,17  | 0,784099439 | 0,37  | 0,579739537 |
| Gm15612 | -0,05 | 0,922250266 | 0,08  | 0,899339629 | 0,05  | 0,973186233 | -0,21 | 0,694370415 | -0,1  | 0,886693819 |
| Gm15614 | 0,21  | 0,809560399 | 0,26  | 0,882931058 | 0,17  | 0,817780561 | -0,24 | 0,690709163 | -0,39 | 0,626667755 |
| Gm15622 | 0,06  | 0,932531737 | 0,18  | 0,753679288 | 0,13  | 0,834069966 | 0,09  | 0,837461612 | 0,06  | 0,934344891 |
| Gm15624 | 0,08  | 0,905505369 | 0,24  | 0,731912687 | 0,11  | 0,845651772 | -0,28 | 0,489768416 | -0,16 | 0,802618378 |
| Gm15627 | 0,25  | 0,5837369   | 0,25  | 0,730745583 | -0,66 | 0,410239762 | -0,1  | 0,825265029 | 0,32  | 0,587305934 |
| Gm15628 | 0     | 0,998210173 | 0,14  | 0,810635763 | -0,07 | 0,943788892 | -0,04 | 0,932512513 | -0,02 | 0,983752142 |
| Gm15631 | 0,05  | 0,937444361 | 0,05  | 0,959685428 | 0,04  | 0,953456022 | -0,02 | 0,977322993 | -0,06 | 0,938825649 |
| Gm15637 | 0,35  | 0,376151377 | 0,12  | 0,793603525 | -0,31 | 0,654328013 | -0,35 | 0,468479478 | 0,13  | 0,905842374 |
| Gm15638 | 0,32  | 0,515322623 | -0,01 | 0,996105203 | -0,06 | 0,946161587 | -0,03 | 0,947855036 | -0,09 | 0,923816228 |
| Gm15645 | 0,19  | 0,803761785 | -0,32 | 0,501438027 | -0,33 | 0,707539555 | 0,07  | 0,912873526 | -0,51 | 0,682929195 |
| Gm15651 | -0,02 | 0,964894892 | 0,05  | 0,915705187 | -0,35 | 0,540782039 | 0     | 0,998900166 | -0,15 | 0,830268209 |
| Gm15658 | -0,67 | 0,157853388 | -0,93 | 0,459231649 | -0,08 | 0,950862176 | -0,35 | 0,522478488 | -0,79 | 0,203422529 |
| Gm15663 | -0,31 | 0,596655034 | -0,05 | 0,942965593 | -0,12 | 0,9030272   | -0,98 | 0,128355033 | 0,04  | 0,973382116 |
| Gm15679 | 0,05  | 0,923035054 | -0,06 | 0,926301482 | -0,11 | 0,85576319  | -0,01 | 0,980203887 | 0,02  | 0,987807848 |
| Gm15688 | -0,1  | 0,836628681 | 0,1   | 0,869495185 | -0,23 | 0,657277431 | 0,15  | 0,783708375 | 0,07  | 0,928671864 |
| Gm15689 | 0,35  | 0,532965036 | -0,11 | 0,820851855 | -0,23 | 0,744387748 | 0,41  | 0,216607755 | 0,01  | 0,990633766 |
| Gm15698 | -0,14 | 0,829299665 | -0,61 | 0,371529423 | 0,01  | 0,99394877  | 0,38  | 0,533965374 | -0,19 | 0,834671019 |

|         |       |             |       |             |       |             |       |             |       |             |
|---------|-------|-------------|-------|-------------|-------|-------------|-------|-------------|-------|-------------|
| Gm15704 | 0,68  | 0,416273302 | -0,15 | 0,956555856 | -1    | 0,41010748  | -0,08 | 0,972529187 | -0,38 | 0,840515079 |
| Gm15706 | -0,25 | 0,637255723 | -0,38 | 0,566340353 | 0,48  | 0,679248742 | -0,69 | 0,222906354 | -0,31 | 0,72210597  |
| Gm15708 | 0,66  | 0,545805455 | 0,11  | 0,901000778 | -0,34 | 0,641142024 | 0,04  | 0,971149993 | 0,01  | 0,994774512 |
| Gm15713 | 0,6   | 0,327334001 | 0,06  | 0,919027673 | 0,18  | 0,720389578 | 0,09  | 0,841644929 | 0,36  | 0,507222763 |
| Gm15723 | -0,03 | 0,950930226 | 0,27  | 0,713393983 | -0,51 | 0,347357406 | -0,15 | 0,789717483 | -0,05 | 0,961448496 |
| Gm15731 | 0,17  | 0,791150064 | -0,15 | 0,703923817 | 0,11  | 0,898305096 | -0,01 | 0,984966598 | -0,11 | 0,889954957 |
| Gm15736 | -0,05 | 0,919110324 | -0,04 | 0,958856577 | -0,29 | 0,586511891 | 0,16  | 0,636309622 | -0,02 | 0,983469081 |
| Gm15737 | -0,44 | 0,742022098 | 0,13  | 0,912340934 | -0,53 | 0,378741497 | 2     | 0,041510515 | -0,29 | 0,815693459 |
| Gm15742 | 0,1   | 0,840515514 | 0,11  | 0,813235994 | 0,18  | 0,747599709 | -0,2  | 0,806596364 | -0,06 | 0,968130547 |
| Gm15743 | 0,21  | 0,633989663 | -0,1  | 0,850048209 | -0,47 | 0,58672573  | 0,06  | 0,883059585 | -0,06 | 0,946133906 |
| Gm15753 | 0,38  | 0,339433887 | 0,07  | 0,954024651 | -0,18 | 0,776419989 | -0,21 | 0,748470342 | 0,21  | 0,779912857 |
| Gm15759 | 0,12  | 0,852363306 | -0,04 | 0,965321837 | 0,13  | 0,844709981 | 0,29  | 0,338891546 | 0,13  | 0,894623317 |
| Gm15760 | -0,16 | 0,799472935 | -0,1  | 0,859954464 | -0,14 | 0,850868333 | -0,89 | 0,075079192 | -0,48 | 0,366079495 |
| Gm15762 | 0,25  | 0,472739337 | 0,06  | 0,919762719 | -0,21 | 0,71593256  | -0,41 | 0,436937389 | -0,45 | 0,452500684 |
| Gm15764 | 0,1   | 0,852279296 | -0,25 | 0,821664771 | -0,37 | 0,483761569 | -0,92 | 0,603182524 | -0,19 | 0,927908317 |
| Gm15767 | -0,11 | 0,870052902 | -0,07 | 0,935329426 | -0,25 | 0,775367269 | 0,14  | 0,761116921 | 0,01  | 0,989179767 |
| Gm15772 | 0,11  | 0,8181283   | -0,1  | 0,864165881 | 0,17  | 0,744387748 | 0,41  | 0,227401503 | 0,05  | 0,956610289 |
| Gm15774 | 0,08  | 0,869565514 | -0,07 | 0,882589938 | 0,01  | 0,989491273 | 0,14  | 0,717400816 | 0,06  | 0,947559952 |
| Gm15787 | 0,06  | 0,940822026 | 0,25  | 0,828219939 | -0,29 | 0,735468851 | -0,71 | 0,451554351 | -0,38 | 0,478324516 |
| Gm15800 | 0,43  | 0,311616711 | 0,39  | 0,508907274 | -0,76 | 0,109708617 | -0,6  | 0,161251943 | 0,04  | 0,96738578  |
| Gm15813 | 0,27  | 0,757032046 | -0,31 | 0,781665479 | 0,23  | 0,734733528 | 0,4   | 0,531153904 | -0,1  | 0,9007804   |
| Gm15816 | 0,1   | 0,846578418 | 0,17  | 0,857490594 | -0,2  | 0,720069267 | -0,17 | 0,742693508 | -0,02 | 0,983713871 |
| Gm15821 | 0,02  | 0,98608257  | 0,24  | 0,588131423 | -0,63 | 0,318751836 | -0,34 | 0,678790333 | 0,23  | 0,826206511 |
| Gm15825 | -0,24 | 0,673291416 | -0,16 | 0,809683705 | -0,11 | 0,927950027 | 0,23  | 0,590833037 | 0,16  | 0,828679046 |
| Gm15834 | 0,21  | 0,687662951 | 0,01  | 0,99305294  | -0,33 | 0,610441465 | 0,31  | 0,348565724 | 0,63  | 0,169601895 |
| Gm15850 | 0,27  | 0,827552513 | -0,17 | 0,813516293 | 0,03  | 0,980408753 | 0,01  | 0,989572451 | 0,28  | 0,697818445 |
| Gm15866 | 0     | 0,996998625 | -0,17 | 0,793642574 | 0,21  | 0,715497532 | 0,05  | 0,95852873  | -0,2  | 0,851143481 |
| Gm15867 | 0,25  | 0,613859526 | 0,13  | 0,845762833 | 0,01  | 0,993559103 | 0,12  | 0,757267334 | 0,09  | 0,905581898 |
| Gm1587  | 0,14  | 0,783200207 | 0,07  | 0,887752277 | -0,04 | 0,959792746 | 0     | 0,997827705 | -0,09 | 0,932521789 |
| Gm15870 | 0,18  | 0,702406672 | -0,22 | 0,774278866 | -0,22 | 0,652745075 | -0,22 | 0,588844463 | -0,61 | 0,340734388 |
| Gm15880 | -0,44 | 0,60936249  | -0,31 | 0,792290003 | -0,09 | 0,923350407 | 0,11  | 0,828361053 | -0,22 | 0,745134899 |
| Gm15881 | 0,18  | 0,71485615  | 0,05  | 0,910203909 | -0,14 | 0,861877024 | -0,07 | 0,855472984 | -0,13 | 0,856295805 |
| Gm15883 | 0,21  | 0,63699384  | -0,36 | 0,561842393 | -0,06 | 0,955984004 | 0,03  | 0,959450564 | -0,03 | 0,97872616  |
| Gm15886 | 0,09  | 0,909885273 | -0,52 | 0,411059412 | -0,39 | 0,598179126 | 1,02  | 0,22844695  | 0,41  | 0,684349871 |
| Gm15894 | 0,14  | 0,754029145 | -0,17 | 0,790939978 | -0,79 | 0,193368921 | 0,32  | 0,639359737 | -0,2  | 0,745394943 |

|         |       |             |       |             |       |             |       |             |       |             |
|---------|-------|-------------|-------|-------------|-------|-------------|-------|-------------|-------|-------------|
| Gm15895 | 0,17  | 0,675221653 | -0,35 | 0,644818618 | -0,18 | 0,802635544 | 0,18  | 0,604127556 | 0,02  | 0,985269236 |
| Gm15903 | -0,27 | 0,712165686 | -0,33 | 0,630199793 | -0,22 | 0,692825782 | -0,1  | 0,81096279  | -0,24 | 0,699996356 |
| Gm15908 | -0,06 | 0,921060011 | 0,28  | 0,729880381 | -0,78 | 0,370386535 | -0,27 | 0,733028982 | -0,12 | 0,921720089 |
| Gm15910 | 0,02  | 0,980085387 | -0,02 | 0,986535927 | -0,31 | 0,637321546 | -0,01 | 0,983166423 | 0,16  | 0,800540569 |
| Gm15915 | 0,05  | 0,969486005 | -0,34 | 0,395413926 | -0,32 | 0,55462862  | 0     | 0,996253424 | 0,11  | 0,920355527 |
| Gm15918 | -0,02 | 0,983663467 | 0,16  | 0,737997126 | 0,04  | 0,957534611 | -0,88 | 0,704992461 | -0,39 | 0,907903208 |
| Gm15927 | 0,09  | 0,886889675 | -0,48 | 0,4411787   | -0,21 | 0,85833551  | 0,09  | 0,879005234 | 0,03  | 0,991291007 |
| Gm15934 | -0,13 | 0,811859636 | 0     | 0,997700959 | 0,02  | 0,977897176 | -0,13 | 0,72638972  | -0,16 | 0,780248217 |
| Gm15939 | 0,17  | 0,808646898 | -0,61 | 0,80192513  | -0,34 | 0,70365819  | 0,62  | 0,630313092 | -0,01 | 0,992370267 |
| Gm15941 | 0,72  | 0,271043284 | -0,04 | 0,973945454 | -0,11 | 0,898935616 | 0,24  | 0,742815987 | 0,12  | 0,927536545 |
| Gm15952 | 0,15  | 0,761457464 | 0,1   | 0,922703368 | -0,61 | 0,279980018 | 0     | 1           | 0,17  | 0,846219206 |
| Gm15958 | 0,12  | 0,827116244 | 0,16  | 0,741888655 | 0,18  | 0,821141998 | 0,05  | 0,937077132 | 0,58  | 0,327709072 |
| Gm15972 | -0,01 | 0,992655604 | 0,06  | 0,902148738 | 0,09  | 0,898382247 | 0,03  | 0,963392781 | 0,1   | 0,911850421 |
| Gm15983 | -0,01 | 0,989784447 | -0,05 | 0,932292974 | -0,04 | 0,950278774 | 0,26  | 0,619922378 | -0,08 | 0,928775639 |
| Gm15984 | 0,65  | 0,214139353 | 0,19  | 0,77148563  | 0,47  | 0,570568062 | -0,23 | 0,733349365 | 0,21  | 0,735796038 |
| Gm15987 | 0,2   | 0,613990129 | -0,14 | 0,850001559 | -0,02 | 0,985555255 | 0,46  | 0,249956839 | 0,26  | 0,731865047 |
| Gm15997 | -0,06 | 0,910211895 | -0,05 | 0,927205716 | -0,27 | 0,678610655 | -0,66 | 0,305007715 | -0,31 | 0,797293554 |
| Gm15998 | -0,38 | 0,469307745 | 0,1   | 0,857874036 | 0,58  | 0,287401098 | -0,99 | 0,093418481 | -0,5  | 0,752900829 |
| Gm16006 | 0,04  | 0,95290436  | -0,31 | 0,589733014 | -0,12 | 0,860923344 | 0,24  | 0,797527363 | 0,14  | 0,910083563 |
| Gm16010 | 0,04  | 0,942948768 | -0,2  | 0,678839377 | -0,23 | 0,637321546 | -0,15 | 0,755928946 | -0,01 | 0,991480325 |
| Gm16013 | -0,1  | 0,833900133 | 0,18  | 0,707524747 | 0,1   | 0,89045643  | 0,03  | 0,943508556 | 0,18  | 0,750504485 |
| Gm16023 | -0,21 | 0,81313264  | 0,12  | 0,910688765 | 0,05  | 0,955925139 | -0,86 | 0,102034118 | 0,34  | 0,673120647 |
| Gm16036 | 0,22  | 0,798561927 | 0,05  | 0,917256002 | -0,21 | 0,658520591 | -0,1  | 0,818711104 | 0,15  | 0,844455252 |
| Gm16041 | -0,25 | 0,741974321 | -0,63 | 0,141157706 | -0,22 | 0,777210497 | 0,43  | 0,244334606 | 0,16  | 0,787779106 |
| Gm16046 | 0,09  | 0,941798404 | 0     | 1           | -0,15 | 0,867571963 | 0,3   | 0,428295778 | -0,03 | 0,969950327 |
| Gm16049 | -0,85 | 0,175830295 | -0,71 | 0,605851161 | 0,59  | 0,396697754 | -0,01 | 0,995662115 | 0,16  | 0,898309858 |
| Gm1604a | 0,19  | 0,862124608 | -0,01 | 0,996113371 | -0,42 | 0,437087993 | -0,28 | 0,663160203 | 0,18  | 0,869113953 |
| Gm1604b | 0,08  | 0,898567375 | -0,24 | 0,60993276  | -0,22 | 0,742758388 | 0,48  | 0,412371936 | 0,06  | 0,949178165 |
| Gm16062 | -0,03 | 0,970597988 | 0,19  | 0,756778611 | -0,29 | 0,645159648 | 0,33  | 0,440328164 | 0,26  | 0,765256761 |
| Gm16063 | -0,02 | 0,981777139 | 0,48  | 0,694759677 | -0,61 | 0,309752189 | 0,21  | 0,876439802 | 0,51  | 0,507222763 |
| Gm16068 | 0,13  | 0,823108731 | 0,19  | 0,720667099 | -0,15 | 0,832665595 | -0,12 | 0,740454395 | -0,01 | 0,984125319 |
| Gm16070 | 0,19  | 0,701627731 | 0,02  | 0,9860901   | -0,16 | 0,75200406  | -1,75 | 0,234882575 | 0,15  | 0,947559952 |
| Gm16083 | 0,09  | 0,908658974 | 0,95  | 0,121175304 | -0,45 | 0,606696556 | -0,4  | 0,30684572  | 0,31  | 0,676744294 |
| Gm16086 | 0,03  | 0,972736855 | 0,12  | 0,80097084  | -0,01 | 0,994306831 | 0,14  | 0,801715957 | -0,6  | 0,428613647 |
| Gm16087 | 0,41  | 0,302609278 | 0,08  | 0,905775272 | 0,21  | 0,856605654 | 0,05  | 0,908141892 | 0,13  | 0,876927228 |

|         |       |             |       |             |       |             |       |             |       |             |
|---------|-------|-------------|-------|-------------|-------|-------------|-------|-------------|-------|-------------|
| Gm16090 | 0,35  | 0,491641812 | 0,46  | 0,470112519 | 0,21  | 0,805783058 | -0,54 | 0,39058196  | -0,13 | 0,916297433 |
| Gm16096 | 0,51  | 0,640002115 | -0,33 | 0,543685328 | 0,49  | 0,763233047 | 0,53  | 0,291280701 | 0,13  | 0,939127163 |
| Gm16104 | -0,7  | 0,20299588  | -0,72 | 0,323278688 | 1,07  | 0,13195341  | 0,1   | 0,927867778 | -0,5  | 0,615777631 |
| Gm16108 | 0,24  | 0,630080875 | 0,13  | 0,794404033 | -0,03 | 0,974887915 | -0,02 | 0,971334673 | 0,11  | 0,881943508 |
| Gm16116 | 0,1   | 0,88956316  | 0,1   | 0,864363741 | -0,42 | 0,425429138 | 0,02  | 0,970931237 | -0,28 | 0,622910734 |
| Gm16120 | 0,14  | 0,780773609 | 0,28  | 0,668737729 | 0,07  | 0,929871006 | -0,53 | 0,29273067  | -0,05 | 0,953297732 |
| Gm16121 | 0,23  | 0,825300036 | 0,09  | 0,910203909 | -0,67 | 0,146556211 | 0,49  | 0,56514466  | 0,14  | 0,903084993 |
| Gm16124 | 0,23  | 0,681657169 | 0,25  | 0,738199172 | 0,44  | 0,556454102 | -0,54 | 0,246337947 | -0,14 | 0,875421436 |
| Gm16130 | 0,34  | 0,665625405 | 0,22  | 0,823564094 | -0,33 | 0,478503279 | 0,02  | 0,988205241 | 0,25  | 0,708898543 |
| Gm16133 | 0,35  | 0,788623069 | 0,49  | 0,641985948 | -0,18 | 0,820243663 | -0,31 | 0,788127436 | 0,35  | 0,804848688 |
| Gm16136 | -0,15 | 0,74672311  | -0,04 | 0,965589332 | 0,27  | 0,636722883 | 0,1   | 0,845876824 | -0,18 | 0,861218943 |
| Gm16142 | -0,19 | 0,671804987 | -0,25 | 0,671478653 | -0,08 | 0,911634383 | 0,2   | 0,636916558 | -0,01 | 0,991710068 |
| Gm16143 | -0,19 | 0,793793954 | -0,27 | 0,662134711 | -0,35 | 0,715053761 | -0,08 | 0,879670655 | 0,21  | 0,766559546 |
| Gm16152 | -0,28 | 0,525541839 | 0,31  | 0,500563679 | -0,48 | 0,425721333 | -0,22 | 0,758772982 | 0,62  | 0,353651444 |
| Gm16157 | 0,49  | 0,490877804 | 0,3   | 0,800636573 | -0,21 | 0,805542835 | 0,26  | 0,609350605 | -0,1  | 0,951646452 |
| Gm16159 | -0,03 | 0,970158208 | 0,38  | 0,482091265 | -0,07 | 0,91344763  | -0,02 | 0,974813898 | -0,4  | 0,4940585   |
| Gm16160 | 0,06  | 0,907391935 | -0,27 | 0,582976316 | 0     | 0,998479656 | 0,18  | 0,612044806 | 0,08  | 0,916948665 |
| Gm16168 | -0,14 | 0,765643907 | 0,1   | 0,832117565 | -0,22 | 0,675235188 | -0,03 | 0,952342947 | -0,29 | 0,601077802 |
| Gm16169 | 0,25  | 0,489108813 | 0,43  | 0,501070311 | -0,04 | 0,968677508 | -0,15 | 0,799256118 | 0,03  | 0,978604922 |
| Gm16170 | 0,3   | 0,616954136 | 0,05  | 0,954024651 | 0,32  | 0,615286789 | -0,2  | 0,700246485 | -0,37 | 0,555509871 |
| Gm16174 | 0,41  | 0,269026142 | 0,27  | 0,7122758   | -0,15 | 0,821593262 | -0,58 | 0,128481393 | 0,22  | 0,749887358 |
| Gm16185 | 0,02  | 0,976314749 | 0,03  | 0,97875059  | -0,24 | 0,61212685  | 0,08  | 0,898628138 | 0,29  | 0,586214748 |
| Gm16189 | 0     | 0,999288019 | 0,16  | 0,776548278 | 0,08  | 0,9122363   | 0,24  | 0,665334658 | 0,32  | 0,669861917 |
| Gm16206 | -0,04 | 0,937251448 | -0,13 | 0,744474804 | -0,14 | 0,846296601 | 0,06  | 0,886422917 | 0,01  | 0,991315044 |
| Gm16208 | -0,03 | 0,955342648 | 0,17  | 0,790074482 | -0,1  | 0,876707154 | 0,14  | 0,77433033  | 0,33  | 0,567306543 |
| Gm16222 | 0,18  | 0,648730873 | -0,04 | 0,930565675 | -0,02 | 0,978012085 | 0,03  | 0,957596559 | -0,19 | 0,815177988 |
| Gm16223 | 0,36  | 0,547518444 | 0,12  | 0,882589938 | 0,02  | 0,990836784 | -0,21 | 0,662587743 | 0,18  | 0,809335788 |
| Gm16225 | 0,4   | 0,421957622 | 0,05  | 0,921036877 | -0,09 | 0,892705612 | 0,2   | 0,551234268 | 0,29  | 0,587199571 |
| Gm16226 | -0,07 | 0,921306075 | -0,12 | 0,846045334 | -0,04 | 0,961829577 | 0,24  | 0,705368918 | -0,01 | 0,992671375 |
| Gm16230 | -0,04 | 0,966040007 | -0,53 | 0,43181045  | -0,13 | 0,817780561 | 0,01  | 0,996528367 | -0,68 | 0,590396118 |
| Gm16233 | 0,3   | 0,592367961 | -0,27 | 0,808422093 | -0,01 | 0,991456043 | 0,74  | 0,09620225  | 0,34  | 0,661912448 |
| Gm16239 | 0,4   | 0,311228317 | -0,12 | 0,889334606 | 0,11  | 0,887630371 | 0,21  | 0,668088137 | 0,28  | 0,61355523  |
| Gm16246 | 0,08  | 0,892141122 | -0,08 | 0,907909875 | 0,08  | 0,934056359 | -0,02 | 0,967866794 | 0,11  | 0,877669996 |
| Gm16249 | 0,01  | 0,9947475   | 0,1   | 0,843162191 | 0,22  | 0,681778495 | -0,06 | 0,918795752 | 0,02  | 0,984125319 |
| Gm16252 | -0,3  | 0,488619512 | 0,22  | 0,735554037 | 0,19  | 0,757498725 | -1,18 | 0,05773565  | -1,19 | 0,051651981 |



|         |       |             |       |             |       |             |       |             |       |             |
|---------|-------|-------------|-------|-------------|-------|-------------|-------|-------------|-------|-------------|
| Gm16253 | 0,09  | 0,867243066 | 0,13  | 0,776563849 | -0,41 | 0,646158787 | -0,05 | 0,923647321 | 0,41  | 0,471406593 |
| Gm16254 | 0,39  | 0,489203906 | -0,12 | 0,857503073 | -0,08 | 0,942112992 | 0,43  | 0,29766037  | 0,28  | 0,745574572 |
| Gm16283 | 0,2   | 0,613387484 | -0,1  | 0,824838316 | -0,1  | 0,877023506 | -0,04 | 0,948836682 | 0,11  | 0,904836805 |
| Gm16287 | 0,51  | 0,583073591 | -0,26 | 0,781665479 | -0,06 | 0,945482    | -0,1  | 0,875371281 | 0,09  | 0,943668392 |
| Gm16291 | -0,1  | 0,889978058 | 0,05  | 0,935329426 | 0,2   | 0,750624323 | -0,09 | 0,818849811 | -0,03 | 0,976345724 |
| Gm16294 | 0,01  | 0,988481679 | 0,06  | 0,932292974 | -0,05 | 0,969225469 | -0,1  | 0,885534409 | 0,36  | 0,69063878  |
| Gm16299 | 0,25  | 0,631544171 | -0,05 | 0,93451524  | -0,12 | 0,848462153 | 0,13  | 0,779547737 | 0,13  | 0,841763929 |
| Gm16308 | -0,28 | 0,653142495 | -0,36 | 0,432587683 | -0,48 | 0,556454102 | 0,08  | 0,84963967  | -0,02 | 0,979456872 |
| Gm16311 | 0,08  | 0,932531737 | 0,04  | 0,974580396 | -0,24 | 0,626338135 | -0,3  | 0,471405206 | 0,12  | 0,903241997 |
| Gm16315 | 0,11  | 0,806351733 | 0,1   | 0,874049742 | -0,23 | 0,59976087  | -0,26 | 0,66530992  | 0,13  | 0,880656145 |
| Gm16325 | -0,65 | 0,421957622 | -0,99 | 0,23919586  | 0,07  | 0,959596019 | 0,32  | 0,563890958 | -0,07 | 0,958727726 |
| Gm16336 | 0,07  | 0,959985598 | -0,22 | 0,75824583  | -0,19 | 0,807926482 | 0,1   | 0,879478062 | 0,13  | 0,904040121 |
| Gm16341 | 0,45  | 0,447068257 | 0,24  | 0,664787536 | 0,3   | 0,772008734 | -0,24 | 0,709570719 | 0,3   | 0,811030845 |
| Gm16348 | 0,62  | 0,20584261  | 0,38  | 0,520395205 | -0,33 | 0,719682446 | -0,87 | 0,076348362 | -0,41 | 0,424301504 |
| Gm16364 | 0,16  | 0,803737003 | 0,06  | 0,912169172 | 0,01  | 0,991568687 | 0,02  | 0,983166423 | 0,06  | 0,958856121 |
| Gm16365 | -0,1  | 0,904019418 | -0,59 | 0,493525791 | -0,35 | 0,76657807  | -1,28 | 0,105260656 | -1,02 | 0,398270909 |
| Gm16381 | 0,15  | 0,779331628 | 0,2   | 0,827228251 | 0,25  | 0,648929647 | 0,06  | 0,902575319 | -0,2  | 0,760555206 |
| Gm16386 | 0,52  | 0,647452531 | 0,1   | 0,839673299 | -0,55 | 0,696737432 | -0,51 | 0,62650253  | -0,08 | 0,951223734 |
| Gm16401 | -0,09 | 0,902628825 | 0,1   | 0,900801202 | -0,24 | 0,693655482 | -0,4  | 0,71268364  | 0,16  | 0,914498972 |
| Gm16404 | 0,03  | 0,970938013 | -0,32 | 0,656204868 | -0,13 | 0,8785896   | 0,11  | 0,750333519 | -0,17 | 0,767285294 |
| Gm16432 | 0,02  | 0,982703709 | 0,05  | 0,980771647 | 0     | 0,999571656 | -0,2  | 0,848930763 | 0,5   | 0,508751714 |
| Gm16440 | 0,59  | 0,761457464 | 0,08  | 0,958136368 | -0,73 | 0,599222964 | 0,53  | 0,586013285 | -0,33 | 0,839779961 |
| Gm16441 | 0,11  | 0,800851935 | 0,04  | 0,943915456 | 0     | 0,997220401 | 0,01  | 0,981203009 | 0,15  | 0,806418575 |
| Gm16445 | -0,21 | 0,59710379  | -0,08 | 0,870958707 | 0,23  | 0,693280954 | -0,1  | 0,858662608 | -0,21 | 0,77006342  |
| Gm16462 | 0,21  | 0,695313784 | 0,41  | 0,557547869 | -0,08 | 0,94665439  | -0,05 | 0,899335603 | 0,04  | 0,957403509 |
| Gm1647  | 0,14  | 0,774473335 | -0,03 | 0,979293032 | -0,15 | 0,891365932 | 0,37  | 0,439427107 | 0,22  | 0,801087157 |
| Gm16485 | 0,11  | 0,852759717 | 0,21  | 0,839283725 | -0,06 | 0,955257293 | -0,39 | 0,677265557 | 0,64  | 0,598963515 |
| Gm16486 | 0,27  | 0,532778824 | 0,59  | 0,384286704 | -0,17 | 0,831139996 | -0,93 | 0,244741011 | -0,14 | 0,933064949 |
| Gm16488 | 0,05  | 0,925510521 | 0,03  | 0,961206626 | -0,34 | 0,521569092 | -0,01 | 0,988205241 | 0,11  | 0,887732548 |
| Gm16495 | 0,07  | 0,883130741 | 0,11  | 0,815317911 | -0,15 | 0,797422121 | -0,02 | 0,95852873  | -0,08 | 0,902802615 |
| Gm16496 | -0,17 | 0,663560248 | 0,06  | 0,926157704 | -0,19 | 0,747599709 | 0,35  | 0,467700021 | 0,04  | 0,958259949 |
| Gm16497 | -0,47 | 0,585914159 | 0,2   | 0,853306685 | 0,04  | 0,967154353 | -0,05 | 0,959958662 | 0,03  | 0,983469081 |
| Gm16503 | -0,23 | 0,722721118 | -0,15 | 0,884434898 | 0,35  | 0,487799104 | 0,41  | 0,450450069 | 0,12  | 0,874554354 |
| Gm16508 | 0,2   | 0,739249714 | 0,26  | 0,614530823 | -0,01 | 0,996013326 | -0,16 | 0,746580621 | -0,21 | 0,797167184 |
| Gm16513 | 0,42  | 0,662416763 | -0,11 | 0,883895522 | 0,17  | 0,872690717 | 0,15  | 0,813216198 | -0,37 | 0,581093802 |

|         |       |             |       |             |       |             |       |             |       |             |
|---------|-------|-------------|-------|-------------|-------|-------------|-------|-------------|-------|-------------|
| Gm16523 | -0,2  | 0,746700079 | 0,17  | 0,732044571 | -0,35 | 0,766119437 | -0,82 | 0,14624187  | -0,23 | 0,836061657 |
| Gm16529 | 0,13  | 0,883130741 | -0,04 | 0,944438314 | -0,19 | 0,839096359 | -0,21 | 0,767404494 | 0,1   | 0,950677327 |
| Gm1653  | 0,31  | 0,585334388 | -0,4  | 0,794423608 | -0,39 | 0,550662565 | -0,28 | 0,64943056  | 0,3   | 0,766085069 |
| Gm16537 | 0,06  | 0,932354771 | -0,09 | 0,849473761 | -0,15 | 0,791940256 | 0,19  | 0,653801322 | 0,24  | 0,850105869 |
| Gm16548 | -0,4  | 0,480432164 | -0,33 | 0,759198741 | 0,39  | 0,534181832 | 0,09  | 0,921731995 | -0,02 | 0,984125319 |
| Gm16551 | -0,38 | 0,546348907 | -0,11 | 0,928780248 | -0,18 | 0,785858646 | 0,2   | 0,854971757 | -0,14 | 0,931132966 |
| Gm16553 | -0,2  | 0,645120888 | 0,15  | 0,790939978 | -0,25 | 0,691646302 | 0,06  | 0,899335603 | 0,19  | 0,769038588 |
| Gm16555 | 0,34  | 0,627254596 | 0,21  | 0,765325717 | -0,02 | 0,978554254 | -0,02 | 0,982068244 | 0,55  | 0,417815739 |
| Gm16573 | 0,55  | 0,263105607 | -0,2  | 0,731098047 | -0,08 | 0,906709737 | 0,19  | 0,710455726 | -0,26 | 0,716229308 |
| Gm16576 | -0,14 | 0,88956316  | -0,26 | 0,589994463 | -0,27 | 0,757289944 | -0,17 | 0,650385638 | 0,34  | 0,573106355 |
| Gm16582 | 0,04  | 0,953003466 | -0,04 | 0,954866231 | -0,11 | 0,915321116 | -0,32 | 0,34530061  | -0,18 | 0,773401088 |
| Gm16596 | 0,2   | 0,771983311 | 0,31  | 0,604913956 | -0,43 | 0,473499244 | 0,48  | 0,338716513 | 0,04  | 0,980961333 |
| Gm1661  | -0,34 | 0,613990129 | -0,1  | 0,890136254 | -0,2  | 0,790294921 | 0,24  | 0,429537179 | 0,06  | 0,940878193 |
| Gm16617 | -0,54 | 0,457905777 | 0,14  | 0,938638797 | -0,22 | 0,73437591  | -0,1  | 0,920158794 | -0,04 | 0,971058066 |
| Gm16618 | -0,11 | 0,840654169 | -0,47 | 0,729172466 | -0,36 | 0,530603857 | 0,13  | 0,807489629 | 0,03  | 0,980945466 |
| Gm16619 | 0,21  | 0,764288636 | 0,29  | 0,855261337 | -0,42 | 0,437315481 | -0,04 | 0,949239972 | 0,31  | 0,763240477 |
| Gm16630 | 0,16  | 0,711773009 | -0,11 | 0,934627513 | -0,49 | 0,483761569 | 0,14  | 0,754339703 | 0,28  | 0,702558142 |
| Gm16638 | 0,04  | 0,968500829 | 0,56  | 0,514880019 | -0,25 | 0,750494072 | -0,98 | 0,259810388 | -0,6  | 0,429352602 |
| Gm16675 | 0,19  | 0,833900133 | 0,71  | 0,420739829 | -1,1  | 0,390844055 | -0,17 | 0,766455981 | 1,1   | 0,123547663 |
| Gm16677 | 0,14  | 0,751534367 | -0,13 | 0,818072947 | -0,03 | 0,979028883 | 0,22  | 0,619076621 | 0,19  | 0,776907684 |
| Gm16701 | -0,22 | 0,858711927 | -0,33 | 0,495699452 | 0,08  | 0,923248239 | 0,8   | 0,172239995 | -0,88 | 0,188369226 |
| Gm16702 | -0,11 | 0,879514284 | 0,25  | 0,738762579 | -0,1  | 0,897932497 | -0,14 | 0,797035489 | -0,13 | 0,847424577 |
| Gm16712 | -0,08 | 0,858748956 | -0,39 | 0,530808197 | -0,06 | 0,953282634 | 0,31  | 0,490200621 | 0,2   | 0,816237355 |
| Gm16725 | 0,09  | 0,91694318  | -0,21 | 0,679924978 | -0,37 | 0,36121902  | 0,25  | 0,472853425 | -0,07 | 0,924811486 |
| Gm1673  | 1,29  | 0,263252718 | -0,61 | 0,430868646 | -0,51 | 0,513446928 | -0,28 | 0,654230107 | -0,79 | 0,215873518 |
| Gm16731 | 0,3   | 0,500851085 | 0,16  | 0,808498635 | -0,18 | 0,782805427 | -0,22 | 0,626441608 | -0,32 | 0,587735967 |
| Gm16740 | 0,62  | 0,099229964 | 0,03  | 0,958621018 | -0,08 | 0,95907725  | 0,28  | 0,835573451 | 0,19  | 0,910721379 |
| Gm16754 | 0,27  | 0,765464964 | 0,09  | 0,860629851 | -0,37 | 0,562169896 | -0,11 | 0,79020758  | -0,12 | 0,866693394 |
| Gm16755 | 0,22  | 0,707070061 | -0,37 | 0,658349899 | -0,22 | 0,702928613 | 0,2   | 0,597708995 | 0,18  | 0,799199452 |
| Gm16758 | 0,05  | 0,950669622 | -0,13 | 0,805467498 | 0,04  | 0,967930981 | 0,09  | 0,813186563 | -0,19 | 0,824727805 |
| Gm16759 | -0,16 | 0,839118329 | 0,06  | 0,969812452 | -0,37 | 0,541598153 | 0,18  | 0,682070739 | 0,03  | 0,980961333 |
| Gm16793 | -0,09 | 0,905414735 | 0,1   | 0,926157704 | 0,28  | 0,64932182  | 0     | 0,999221046 | -0,14 | 0,859050817 |
| Gm16794 | -0,05 | 0,959985598 | -0,04 | 0,970540424 | 0,11  | 0,905250019 | -1,65 | 0,040803179 | -0,97 | 0,067696939 |
| Gm16796 | 0,06  | 0,948926586 | -0,12 | 0,910013125 | -0,03 | 0,976874033 | -0,21 | 0,672331878 | -0,35 | 0,668747774 |
| Gm16833 | 0,45  | 0,574307926 | -0,15 | 0,812713089 | -0,15 | 0,857690649 | 0,27  | 0,674962531 | 0,1   | 0,910123068 |

|         |       |             |       |             |       |             |       |             |       |             |
|---------|-------|-------------|-------|-------------|-------|-------------|-------|-------------|-------|-------------|
| Gm16835 | -0,17 | 0,841140165 | -0,2  | 0,807175471 | -0,02 | 0,980713449 | 0,04  | 0,961864701 | -0,09 | 0,914758513 |
| Gm16838 | 0,09  | 0,85335611  | -0,05 | 0,923048846 | 0,27  | 0,696876155 | 0,21  | 0,634066239 | 0,07  | 0,947398766 |
| Gm16845 | -0,32 | 0,673291416 | -0,37 | 0,810875398 | 0,02  | 0,991416175 | 0,2   | 0,794327559 | 0,17  | 0,865866242 |
| Gm16853 | 0,36  | 0,535737059 | -0,51 | 0,271257402 | 0     | 0,997268369 | 0,4   | 0,44443236  | -0,15 | 0,881915602 |
| Gm16861 | 0,24  | 0,613347532 | 0     | 0,997711184 | -0,1  | 0,880622107 | -0,64 | 0,464949508 | -0,26 | 0,781405349 |
| Gm16863 | 0,56  | 0,198893126 | -0,19 | 0,867265251 | -0,04 | 0,958867495 | 0,01  | 0,984136649 | 0,02  | 0,984480151 |
| Gm16867 | 0,23  | 0,683299822 | -0,5  | 0,876764438 | 0,13  | 0,922724053 | -0,48 | 0,866531336 | -0,3  | 0,920355527 |
| Gm16876 | 0,02  | 0,969486005 | 0,23  | 0,622603765 | 0,18  | 0,70635953  | 0,01  | 0,979083713 | 0,12  | 0,91423979  |
| Gm16892 | -0,1  | 0,90572243  | -0,27 | 0,807175471 | -0,16 | 0,829285065 | -0,08 | 0,922740736 | 0,07  | 0,937558003 |
| Gm16894 | -0,04 | 0,955394263 | 0,21  | 0,758037461 | -0,57 | 0,457592846 | -0,39 | 0,242715162 | 0,01  | 0,989016067 |
| Gm16897 | 0,11  | 0,958605895 | 0,28  | 0,709432782 | -0,82 | 0,036818657 | -1,11 | 0,255598764 | -0,18 | 0,893225952 |
| Gm16907 | -0,01 | 0,994117687 | -0,06 | 0,932292974 | -0,1  | 0,904239687 | -0,02 | 0,977322993 | -0,13 | 0,864166878 |
| Gm16938 | -0,27 | 0,71347786  | -0,78 | 0,453958512 | -0,01 | 0,993071391 | -0,08 | 0,909976349 | 0,21  | 0,859609058 |
| Gm16973 | -0,78 | 0,519887764 | -0,04 | 0,982420791 | -0,29 | 0,598179126 | 0,08  | 0,939730251 | -0,6  | 0,575543402 |
| Gm16976 | -0,17 | 0,814269237 | -0,24 | 0,67317894  | 0,44  | 0,370554673 | 0,44  | 0,394707364 | 0,67  | 0,398202068 |
| Gm1698  | 0,13  | 0,878562194 | 0,01  | 0,999210601 | 0,05  | 0,950846671 | 0,2   | 0,560837274 | 0,25  | 0,765342998 |
| Gm16982 | -0,22 | 0,658095974 | 0,11  | 0,873411651 | 0,11  | 0,838742863 | 0,11  | 0,821383017 | 0,12  | 0,872665918 |
| Gm16984 | 0,58  | 0,445207046 | 0,56  | 0,620236896 | -0,09 | 0,911634383 | 0,08  | 0,89150663  | 0,27  | 0,608004947 |
| Gm16998 | -0,47 | 0,434641897 | 0,39  | 0,808428528 | 0,33  | 0,619446677 | -0,34 | 0,746580621 | -1,02 | 0,419648538 |
| Gm17019 | -0,3  | 0,676940372 | -0,42 | 0,415198475 | -0,74 | 0,688126003 | 0,36  | 0,405392375 | -0,07 | 0,922921816 |
| Gm17025 | 0,48  | 0,620282299 | 0,16  | 0,78645186  | -0,33 | 0,541560473 | -0,04 | 0,922275195 | -0,07 | 0,934185668 |
| Gm17026 | 0,1   | 0,945291777 | 0,14  | 0,946599376 | -0,56 | 0,457506381 | 0,68  | 0,65601715  | 0,18  | 0,89761151  |
| Gm17029 | -0,16 | 0,871580532 | 0,04  | 0,969314504 | -0,11 | 0,934245568 | -0,07 | 0,921146912 | 0,25  | 0,628999683 |
| Gm17057 | 0,17  | 0,771252343 | -0,05 | 0,919475021 | 0,24  | 0,751758339 | 0,11  | 0,812625466 | 0,23  | 0,738901324 |
| Gm17059 | -0,02 | 0,971227403 | 0,01  | 0,981906101 | -0,12 | 0,823823322 | 0     | 1           | -0,3  | 0,584122445 |
| Gm17066 | 0,55  | 0,438315603 | -0,19 | 0,746794144 | -0,38 | 0,70055782  | 0,32  | 0,686514009 | 0,23  | 0,850924689 |
| Gm17089 | 0,49  | 0,627312744 | 0,72  | 0,508633526 | 0,04  | 0,956570063 | 0,27  | 0,565324879 | -0,01 | 0,991291007 |
| Gm17093 | -0,22 | 0,685826767 | 0,05  | 0,910688765 | -0,3  | 0,562905044 | 0,1   | 0,844984902 | 0,54  | 0,554190981 |
| Gm17094 | -0,11 | 0,892124736 | 0     | 1           | 0,1   | 0,932022751 | 0,31  | 0,29467802  | -0,07 | 0,952462776 |
| Gm17102 | 0,71  | 0,454615729 | 0,16  | 0,761404909 | -0,2  | 0,716743339 | -0,09 | 0,843949302 | 0,03  | 0,977599806 |
| Gm17115 | 0,25  | 0,839881823 | 0,19  | 0,65864372  | 0,38  | 0,740579016 | 0,03  | 0,959958662 | 0,33  | 0,499989818 |
| Gm17116 | -0,29 | 0,672860905 | -0,09 | 0,912340934 | 0,07  | 0,923350407 | 0,12  | 0,907350266 | 0,38  | 0,635195583 |
| Gm17124 | 0,95  | 0,52132136  | 0,13  | 0,826858547 | 0,27  | 0,78483394  | 0,46  | 0,470528656 | -0,09 | 0,891011128 |
| Gm17141 | -0,08 | 0,9231839   | 0,04  | 0,947684955 | 0,06  | 0,94178334  | 0,43  | 0,316055884 | 0,36  | 0,536721752 |
| Gm1715  | 0,43  | 0,499510828 | -0,07 | 0,965147491 | -0,4  | 0,599202081 | 0,34  | 0,502210241 | 0,06  | 0,956610289 |

|         |       |             |       |             |       |             |       |             |       |             |
|---------|-------|-------------|-------|-------------|-------|-------------|-------|-------------|-------|-------------|
| Gm17167 | -0,11 | 0,904019418 | -0,17 | 0,809245703 | -0,13 | 0,926263109 | -0,18 | 0,713579222 | -0,23 | 0,73486361  |
| Gm17174 | 0,06  | 0,938976612 | -0,09 | 0,881339866 | -0,63 | 0,68845998  | 0,24  | 0,662848818 | 0,16  | 0,839824817 |
| Gm17175 | 0,07  | 0,926316023 | 0,03  | 0,98459889  | -0,06 | 0,95303117  | 0,13  | 0,895878968 | 0,45  | 0,464702845 |
| Gm17182 | 0,19  | 0,682512912 | -0,06 | 0,904698551 | -0,18 | 0,764154568 | 0,08  | 0,840657538 | 0,07  | 0,928764431 |
| Gm17196 | 0,03  | 0,965468545 | 0,11  | 0,847483504 | -0,42 | 0,35431494  | 0,17  | 0,780675133 | -0,17 | 0,807816401 |
| Gm1720  | 0,02  | 0,983711346 | -0,37 | 0,631534856 | -0,07 | 0,929395646 | 0,35  | 0,612464969 | -0,08 | 0,959171847 |
| Gm17215 | 0,14  | 0,823611876 | 0,13  | 0,910748684 | -0,14 | 0,854115638 | 0,11  | 0,78088261  | 0,02  | 0,981913783 |
| Gm17224 | 0,02  | 0,98659023  | 0,5   | 0,757293036 | 0,1   | 0,894866237 | 0,46  | 0,754860424 | 0,07  | 0,97425848  |
| Gm17244 | 0     | 0,998210173 | -0,2  | 0,820137069 | -0,03 | 0,982470903 | -0,01 | 0,991962381 | -0,25 | 0,835191    |
| Gm17250 | -0,06 | 0,958188047 | 0,21  | 0,804738733 | 0,21  | 0,836779352 | 0,45  | 0,24812886  | 0,02  | 0,980961333 |
| Gm17266 | 0     | 0,999818454 | -0,2  | 0,7122758   | 0     | 0,99879674  | 0,1   | 0,868680052 | -0,13 | 0,889954957 |
| Gm17281 | 0,15  | 0,778869381 | 0,09  | 0,847592787 | -0,17 | 0,739524981 | 0,08  | 0,81848916  | 0,02  | 0,982175252 |
| Gm17296 | -0,11 | 0,898129222 | -0,36 | 0,652845303 | 0,04  | 0,968008918 | 1,02  | 0,059841623 | -0,18 | 0,830086988 |
| Gm17308 | 0,05  | 0,931118769 | 0,13  | 0,82505545  | -0,06 | 0,934354994 | -0,15 | 0,702995236 | -0,17 | 0,814923306 |
| Gm17324 | 0,07  | 0,926452636 | -0,33 | 0,703923817 | 0,17  | 0,830514771 | -0,41 | 0,534285767 | -0,64 | 0,272652221 |
| Gm17344 | 0,51  | 0,441176207 | -0,1  | 0,937377463 | 0,15  | 0,887458532 | -0,66 | 0,116090205 | 1,1   | 0,073025864 |
| Gm17359 | 0     | 0,999549745 | -0,11 | 0,943915456 | -0,03 | 0,978012085 | -0,2  | 0,657959464 | -0,24 | 0,739804907 |
| Gm17382 | 0,23  | 0,573661766 | 0,03  | 0,957659362 | -0,17 | 0,789802954 | 0,07  | 0,900918368 | 0,25  | 0,669861917 |
| Gm17388 | -0,03 | 0,963914207 | -0,09 | 0,874791597 | 0,15  | 0,876684089 | 0,23  | 0,618453093 | 0,94  | 0,087632866 |
| Gm17399 | 0,3   | 0,559760851 | 0,1   | 0,87095497  | 0,14  | 0,841510741 | 0,22  | 0,667408547 | 0,18  | 0,832736649 |
| Gm17409 | 0,32  | 0,54401985  | -0,14 | 0,831580851 | 0,04  | 0,958867495 | -0,03 | 0,955464588 | 0,31  | 0,603933678 |
| Gm17416 | -0,06 | 0,926181408 | -0,21 | 0,690627372 | -0,1  | 0,898047011 | 0,1   | 0,802380914 | -0,15 | 0,835180315 |
| Gm17455 | -0,66 | 0,652819827 | 0,26  | 0,703291096 | 0,08  | 0,958867495 | -0,24 | 0,639359737 | -0,07 | 0,954004872 |
| Gm17473 | 0,03  | 0,95718608  | -0,04 | 0,943915456 | -0,12 | 0,834069966 | 0,04  | 0,948515439 | 0,37  | 0,523184505 |
| Gm17484 | -0,07 | 0,912322887 | 0,59  | 0,237150388 | -0,07 | 0,939253629 | -0,25 | 0,690442683 | -0,1  | 0,934185668 |
| Gm17494 | -0,02 | 0,976574175 | -0,1  | 0,864054307 | -0,16 | 0,792886254 | -0,4  | 0,324581666 | -0,23 | 0,73470277  |
| Gm17501 | -0,07 | 0,919567534 | 0,22  | 0,823859284 | -0,04 | 0,977897176 | 0,99  | 0,064116388 | 0,05  | 0,958259949 |
| Gm17509 | 0,4   | 0,546019769 | -0,04 | 0,943915456 | 0,15  | 0,848156654 | 0,28  | 0,626958815 | 0,06  | 0,961281513 |
| Gm17518 | -0,02 | 0,970286316 | -0,03 | 0,980518468 | -0,07 | 0,925614303 | -0,13 | 0,832134224 | -0,34 | 0,641589842 |
| Gm17540 | -0,04 | 0,938538909 | 0     | 1           | 0,04  | 0,956894731 | 0,02  | 0,967866794 | -0,14 | 0,836061657 |
| Gm17590 | 0,23  | 0,602197374 | 0,14  | 0,76677473  | -0,36 | 0,552409541 | 0     | 1           | 0,21  | 0,729208209 |
| Gm17597 | -0,21 | 0,629541289 | 0,02  | 0,973231257 | 0     | 0,999931921 | 0,12  | 0,768880868 | -0,24 | 0,701874538 |
| Gm17618 | -0,05 | 0,936139343 | 0,08  | 0,880404834 | -0,02 | 0,978207511 | 0,14  | 0,718378323 | 0,09  | 0,890957032 |
| Gm17619 | -0,03 | 0,969707672 | -0,11 | 0,867265251 | -0,14 | 0,779486228 | 0,15  | 0,71383199  | 0,03  | 0,972615084 |
| Gm17634 | -0,01 | 0,991919022 | -0,09 | 0,858860016 | 0,14  | 0,824279952 | 0,06  | 0,906363073 | 0,21  | 0,764656525 |

|         |       |             |       |             |       |             |       |             |       |             |
|---------|-------|-------------|-------|-------------|-------|-------------|-------|-------------|-------|-------------|
| Gm17644 | 0,05  | 0,948926586 | 0,09  | 0,859954464 | -0,21 | 0,651559391 | -0,16 | 0,696837631 | -0,17 | 0,807620467 |
| Gm17660 | -0,73 | 0,127439636 | -0,12 | 0,919873208 | 0,14  | 0,890499122 | 0,06  | 0,963676043 | -0,05 | 0,969994712 |
| Gm17677 | 0,27  | 0,596187053 | 0,06  | 0,941609372 | 0,13  | 0,838289412 | 0,03  | 0,949310624 | 0,22  | 0,710368081 |
| Gm17689 | -0,06 | 0,928103232 | 0,26  | 0,649807993 | -0,11 | 0,882067941 | -0,34 | 0,404293645 | -0,12 | 0,874402778 |
| Gm17727 | -0,11 | 0,820950193 | 0,14  | 0,827496723 | -0,25 | 0,657277431 | -0,12 | 0,807090198 | 0,01  | 0,9939542   |
| Gm17733 | 0,25  | 0,559636965 | -0,24 | 0,72369876  | -0,08 | 0,896164273 | 0,05  | 0,898842201 | 0,19  | 0,731211225 |
| Gm17739 | 0,2   | 0,865055523 | 0,1   | 0,88928164  | 0,36  | 0,415074921 | -0,35 | 0,508331895 | -0,44 | 0,477084157 |
| Gm17745 | -0,52 | 0,556304196 | -0,41 | 0,483436169 | 0,26  | 0,809137779 | -0,42 | 0,714781885 | -0,33 | 0,828280059 |
| Gm17746 | -0,08 | 0,932671813 | 0,06  | 0,897867961 | 0,05  | 0,968802213 | 0,02  | 0,967866794 | -0,01 | 0,993903627 |
| Gm17747 | 0,05  | 0,92069393  | -0,05 | 0,916496897 | -0,08 | 0,932577939 | 0,13  | 0,77314251  | 0,18  | 0,821782896 |
| Gm17749 | 0,5   | 0,413705714 | 0,34  | 0,808222835 | -0,37 | 0,503650142 | 0,75  | 0,377338868 | 0,06  | 0,958361114 |
| Gm17750 | 0,05  | 0,922118639 | 0,1   | 0,812052049 | 0,05  | 0,946777487 | -0,12 | 0,766936722 | -0,11 | 0,900126162 |
| Gm17751 | -0,06 | 0,946212585 | -0,03 | 0,965796793 | -0,23 | 0,741156156 | -0,13 | 0,783476147 | 0,2   | 0,791694696 |
| Gm17753 | 0,08  | 0,863719569 | -0,11 | 0,824372931 | -0,04 | 0,959376967 | -0,02 | 0,963752888 | 0,06  | 0,940878193 |
| Gm17756 | 0,21  | 0,757032046 | 0,1   | 0,825120426 | -0,18 | 0,828672236 | 0,14  | 0,77372709  | 0,41  | 0,57574862  |
| Gm17762 | -0,02 | 0,964677812 | 0,45  | 0,483020336 | 0,07  | 0,921956183 | -0,12 | 0,747738268 | -0,41 | 0,514970139 |
| Gm17764 | -0,04 | 0,927510798 | -0,07 | 0,885546436 | 0,16  | 0,751090942 | 0,04  | 0,9213051   | 0,25  | 0,712786855 |
| Gm17767 | 0,16  | 0,729638783 | 0,06  | 0,920227033 | 0,03  | 0,964423425 | 0,06  | 0,914828446 | 0,2   | 0,830086988 |
| Gm17769 | -0,06 | 0,909232325 | 0,08  | 0,916247917 | 0,01  | 0,994130625 | -0,3  | 0,576295027 | 0,05  | 0,973428839 |
| Gm17778 | 0,16  | 0,840515514 | -0,02 | 0,97291119  | -0,12 | 0,876199546 | 0,13  | 0,692059018 | 0,07  | 0,937558003 |
| Gm17783 | 0,08  | 0,91384779  | 0,3   | 0,826290896 | -0,06 | 0,960285359 | 0,17  | 0,823045201 | 0,22  | 0,777561251 |
| Gm17801 | 0,21  | 0,841140165 | 0,06  | 0,897574732 | -0,13 | 0,861307315 | -0,12 | 0,74524486  | 0,14  | 0,830788023 |
| Gm17821 | -0,08 | 0,910350967 | 0,2   | 0,666450149 | -0,21 | 0,68989337  | -0,12 | 0,801074461 | -0,02 | 0,984065984 |
| Gm17830 | 0,17  | 0,822613889 | 0,22  | 0,857490594 | -0,36 | 0,51305312  | 0,06  | 0,934292237 | 0,23  | 0,716229308 |
| Gm18409 | 0,03  | 0,97300035  | 0,03  | 0,96497149  | -0,31 | 0,490585864 | 0,08  | 0,845813504 | 0,12  | 0,879398898 |
| Gm19269 | 0,41  | 0,738714467 | 0,31  | 0,621112051 | 0,18  | 0,789802954 | -0,29 | 0,557232733 | 0,26  | 0,757244667 |
| Gm19272 | 0,1   | 0,850772648 | 0,09  | 0,846106768 | -0,48 | 0,379638471 | -0,3  | 0,49493081  | -0,27 | 0,763240477 |
| Gm19274 | 0,09  | 0,834498869 | 0,01  | 0,98459889  | -0,06 | 0,940550094 | 0,08  | 0,851079215 | -0,06 | 0,941241684 |
| Gm19276 | 0,38  | 0,554473314 | 0,22  | 0,785244931 | 0,06  | 0,95204022  | -0,24 | 0,620663459 | 0,06  | 0,948341195 |
| Gm19277 | -0,27 | 0,645863119 | -0,55 | 0,268436493 | -0,49 | 0,369527192 | -0,02 | 0,977608888 | -0,28 | 0,659964562 |
| Gm19279 | 0,21  | 0,892141122 | 0,46  | 0,425962779 | -0,62 | 0,607689093 | 0,26  | 0,604909385 | 0,27  | 0,725587145 |
| Gm19281 | 0,05  | 0,929129568 | 0,01  | 0,992175086 | -0,1  | 0,900287506 | -0,04 | 0,941093315 | 0,11  | 0,901966365 |
| Gm19299 | 0     | 0,999288019 | 0,94  | 0,391004656 | 0,63  | 0,621644149 | -0,03 | 0,982450636 | 0,67  | 0,220768726 |
| Gm19303 | 0,15  | 0,76730422  | 0,02  | 0,973112447 | -0,02 | 0,978877446 | 0,25  | 0,598473186 | 0,06  | 0,959077429 |
| Gm19304 | 0,02  | 0,973083012 | -0,01 | 0,996113371 | 0,01  | 0,99407001  | -0,83 | 0,093966892 | -0,67 | 0,31115238  |

|         |       |             |       |             |       |             |       |             |       |             |
|---------|-------|-------------|-------|-------------|-------|-------------|-------|-------------|-------|-------------|
| Gm19313 | 0,1   | 0,904541231 | -0,28 | 0,708168221 | -0,11 | 0,969570532 | -0,93 | 0,238763429 | 0,17  | 0,912733818 |
| Gm19325 | -0,13 | 0,857585372 | -0,14 | 0,906591009 | -0,11 | 0,883534784 | 0,07  | 0,929835301 | 0,03  | 0,9807956   |
| Gm19327 | 0,41  | 0,543570731 | -0,04 | 0,940137448 | -0,17 | 0,863964732 | -0,54 | 0,415444351 | 0,18  | 0,858314976 |
| Gm19335 | 0,11  | 0,799145501 | 0,02  | 0,977204386 | -0,04 | 0,959862254 | 0,06  | 0,880541201 | 0,33  | 0,486794487 |
| Gm19337 | 0,35  | 0,655409333 | -0,07 | 0,89081665  | -0,08 | 0,966647226 | 0,06  | 0,904971257 | 0,41  | 0,457841521 |
| Gm19343 | 0,06  | 0,912510949 | 0,09  | 0,869927431 | -0,11 | 0,887947732 | -0,02 | 0,963752888 | 0,03  | 0,976743304 |
| Gm19344 | 0,02  | 0,989925592 | -0,11 | 0,829839151 | 0,29  | 0,707571856 | -0,19 | 0,758588473 | -0,1  | 0,923886113 |
| Gm19345 | 0,4   | 0,421378808 | 0,06  | 0,932292974 | -0,03 | 0,970308056 | -0,14 | 0,895880186 | 0,08  | 0,950308536 |
| Gm19351 | 0,09  | 0,84988108  | -0,09 | 0,842145037 | 0,01  | 0,990554477 | 0,03  | 0,939923564 | 0,08  | 0,923530475 |
| Gm19359 | 0,17  | 0,719765184 | 0,01  | 0,990052916 | -0,1  | 0,914964363 | 0,26  | 0,563573506 | 0,5   | 0,389664866 |
| Gm19382 | -0,13 | 0,840882072 | 0     | 1           | 0,43  | 0,542758274 | 0     | 1           | 0,11  | 0,874716101 |
| Gm19386 | 0,23  | 0,556745354 | 0,1   | 0,820557322 | -0,18 | 0,698451287 | 0,08  | 0,847641912 | 0,01  | 0,987243218 |
| Gm19391 | 0,05  | 0,960597621 | -0,14 | 0,825313113 | 0,1   | 0,8768401   | 0,09  | 0,815238719 | 0,04  | 0,956822408 |
| Gm19395 | -0,01 | 0,98701986  | -0,08 | 0,894563348 | 0,07  | 0,923258105 | 0,01  | 0,992365775 | 0,05  | 0,965707187 |
| Gm19402 | -0,05 | 0,914868427 | -0,14 | 0,829203986 | 0,12  | 0,815377113 | 0,02  | 0,960914606 | -0,19 | 0,760153803 |
| Gm19409 | -0,2  | 0,70841898  | -0,12 | 0,80192513  | -0,1  | 0,906097666 | -0,24 | 0,48767427  | -0,36 | 0,478324516 |
| Gm19410 | 0,02  | 0,970463755 | 0,18  | 0,850001559 | -0,29 | 0,683917899 | -0,15 | 0,807661309 | -0,23 | 0,735152891 |
| Gm19412 | 0,13  | 0,764288636 | -0,08 | 0,900801202 | -0,28 | 0,70635953  | -0,01 | 0,987052894 | 0,94  | 0,046040893 |
| Gm19424 | -0,13 | 0,90308793  | -0,06 | 0,919762719 | -0,19 | 0,761861872 | 0,18  | 0,629613169 | 0,48  | 0,499998316 |
| Gm19426 | -0,05 | 0,937076069 | -0,13 | 0,756778611 | 0,19  | 0,715497532 | 0,04  | 0,970247298 | -0,24 | 0,778593926 |
| Gm1943  | 0,03  | 0,958512892 | 0,01  | 0,999395995 | 0,14  | 0,845986297 | 0     | 0,998710655 | 0,02  | 0,980945466 |
| Gm19434 | -0,09 | 0,905824734 | 0,23  | 0,855632384 | 0,18  | 0,838527542 | -0,06 | 0,895836916 | -0,06 | 0,944229706 |
| Gm19445 | 0,09  | 0,899550586 | 0,01  | 0,989873399 | -0,14 | 0,79870827  | 0     | 1           | 0,13  | 0,861056054 |
| Gm19461 | 0,11  | 0,839824168 | -0,06 | 0,937424389 | -0,11 | 0,880706627 | 0,29  | 0,500410075 | -0,12 | 0,885997162 |
| Gm19463 | -0,49 | 0,231007701 | -0,38 | 0,572250784 | 0,07  | 0,940489823 | 0,42  | 0,500808967 | -0,37 | 0,759682279 |
| Gm19466 | 0,13  | 0,865776054 | 0,15  | 0,868462743 | -0,05 | 0,954031929 | -0,01 | 0,982359413 | -0,25 | 0,684266387 |
| Gm19471 | 0,05  | 0,921652597 | 0     | 1           | 0,01  | 0,992362085 | -0,07 | 0,850578996 | -0,04 | 0,9680618   |
| Gm19500 | 0,36  | 0,328021998 | 0     | 0,999395995 | -0,05 | 0,951209773 | 0,09  | 0,820472575 | 0     | 0,996704615 |
| Gm19501 | -0,27 | 0,521428194 | 0,12  | 0,818301748 | -0,02 | 0,980731455 | 0,2   | 0,623687496 | 0,18  | 0,777437869 |
| Gm19510 | -0,36 | 0,600246297 | -0,1  | 0,911024505 | 0,09  | 0,903366838 | 0,12  | 0,8214961   | 0,29  | 0,559424283 |
| Gm19514 | 0,28  | 0,666546952 | -0,23 | 0,669073556 | 0,03  | 0,965775869 | 0,17  | 0,663121129 | 0,04  | 0,970753488 |
| Gm19519 | 0,08  | 0,923820085 | -0,03 | 0,983398348 | -0,44 | 0,460945976 | 0,03  | 0,968266606 | -0,08 | 0,932846086 |
| Gm19521 | -0,08 | 0,857049395 | -0,02 | 0,969019461 | -0,08 | 0,906097666 | -0,01 | 0,985188901 | -0,26 | 0,70345696  |
| Gm19522 | 0,1   | 0,867243066 | 0,19  | 0,735689605 | 0     | 0,997581017 | -0,18 | 0,648154714 | 0,27  | 0,587735967 |
| Gm19537 | 0,01  | 0,991919022 | 0     | 1           | -0,23 | 0,770526999 | -0,19 | 0,651948925 | -0,35 | 0,554975763 |

|         |       |             |       |             |       |             |       |             |       |             |
|---------|-------|-------------|-------|-------------|-------|-------------|-------|-------------|-------|-------------|
| Gm19541 | 0,17  | 0,665181891 | 0,02  | 0,970709156 | 0,03  | 0,967172044 | 0,22  | 0,680255321 | 0,17  | 0,823098095 |
| Gm19551 | 0,18  | 0,737803341 | -0,17 | 0,794404033 | 0,63  | 0,60061447  | 1,27  | 0,019207625 | -0,22 | 0,786239369 |
| Gm19552 | -0,26 | 0,593405815 | -0,08 | 0,891749049 | 0,09  | 0,928085218 | -0,76 | 0,701037904 | -1,04 | 0,549181666 |
| Gm19554 | -0,18 | 0,695932247 | -0,19 | 0,701236298 | 0,05  | 0,950725218 | 0,2   | 0,633270262 | -0,02 | 0,984480151 |
| Gm19557 | -0,06 | 0,909885273 | 0,1   | 0,863064855 | -0,27 | 0,702677589 | -1,38 | 0,143543466 | -0,44 | 0,560248704 |
| Gm19569 | 0,01  | 0,98297164  | 0,01  | 0,983071427 | -0,12 | 0,87734396  | -0,07 | 0,894797161 | 0,2   | 0,800540569 |
| Gm19578 | 0,33  | 0,639346687 | 0,18  | 0,697111597 | 0,06  | 0,935384072 | -0,06 | 0,891773132 | 0,08  | 0,931482657 |
| Gm19582 | -0,18 | 0,686076441 | 0     | 0,998513452 | -0,14 | 0,82622365  | 0,08  | 0,829721914 | 0,24  | 0,673120647 |
| Gm19583 | 0,1   | 0,860513893 | 0,06  | 0,907217169 | -0,15 | 0,803439784 | 0,05  | 0,908141892 | 0,29  | 0,550083777 |
| Gm19585 | 0,21  | 0,892823025 | -0,03 | 0,978904487 | -0,8  | 0,577864273 | -1,24 | 0,558718825 | -1,38 | 0,537706015 |
| Gm19589 | -0,2  | 0,694699901 | 0,23  | 0,732847182 | 0,02  | 0,990836784 | -0,21 | 0,69151142  | 0,15  | 0,854372876 |
| Gm19590 | 0,63  | 0,173359555 | 0,62  | 0,235155604 | 0,32  | 0,770526999 | 1,56  | 0,050236686 | -0,38 | 0,680340254 |
| Gm19600 | 0,25  | 0,492100725 | -0,12 | 0,872388615 | 0,09  | 0,902637441 | 0,05  | 0,907715509 | 0,05  | 0,95812344  |
| Gm19619 | 0,16  | 0,797266879 | 0,61  | 0,424068004 | -0,28 | 0,598179126 | -0,1  | 0,80341881  | -0,03 | 0,977091548 |
| Gm19639 | 0,15  | 0,824390658 | 0     | 1           | 0,05  | 0,946842192 | 0,14  | 0,709465672 | 0,04  | 0,956494428 |
| Gm19648 | 0,01  | 0,991726062 | 0,17  | 0,768495353 | -0,15 | 0,887630371 | -0,07 | 0,907662772 | 0,05  | 0,95985938  |
| Gm1965  | 0,06  | 0,96263856  | 0,86  | 0,205835614 | -0,57 | 0,377624042 | -0,05 | 0,967866794 | 0,09  | 0,916173996 |
| Gm19654 | -0,01 | 0,984759626 | -0,04 | 0,950654933 | -0,05 | 0,944441051 | -0,01 | 0,988205241 | 0,01  | 0,990839896 |
| Gm1966  | 1,55  | 0,253104635 | 0,53  | 0,372823162 | -1,04 | 0,2967399   | -0,31 | 0,455877206 | 0,51  | 0,343706058 |
| Gm19665 | 0,34  | 0,654363277 | -0,01 | 0,994735911 | -0,18 | 0,70365819  | 0,01  | 0,98817219  | 0,06  | 0,939448119 |
| Gm19668 | 0,12  | 0,793221158 | 0,02  | 0,965907062 | -0,34 | 0,568962531 | 0,08  | 0,827764222 | 0,18  | 0,77684009  |
| Gm19673 | -0,02 | 0,975642108 | 0,1   | 0,859954464 | -0,22 | 0,698451287 | -0,01 | 0,987873913 | -0,04 | 0,967747124 |
| Gm1968  | 0,09  | 0,902109019 | 0,08  | 0,912878566 | -0,22 | 0,69348886  | 0,02  | 0,97666971  | 0,27  | 0,582633868 |
| Gm19689 | 0,12  | 0,835016158 | 0,12  | 0,88378778  | -0,15 | 0,744387748 | 0,02  | 0,968211182 | 0,31  | 0,634076489 |
| Gm19691 | 0     | 0,998307191 | 0,02  | 0,993068441 | -0,02 | 0,978012085 | 0,23  | 0,601996277 | -0,21 | 0,793839436 |
| Gm19692 | 0,26  | 0,612702073 | 0,21  | 0,73114289  | -0,23 | 0,662451176 | -0,26 | 0,48505774  | -0,26 | 0,68987325  |
| Gm19696 | -0,06 | 0,95176371  | -0,12 | 0,862789755 | 0,05  | 0,963199274 | 0,03  | 0,963392781 | -0,05 | 0,956660468 |
| Gm19703 | -0,12 | 0,897077512 | -0,3  | 0,774377142 | 0     | 0,999931921 | -0,73 | 0,225406554 | -0,43 | 0,679810349 |
| Gm19705 | 0,38  | 0,526237328 | 0,37  | 0,443322366 | -0,82 | 0,080905165 | 0,54  | 0,168647568 | 1,02  | 0,047888582 |
| Gm19708 | 0,02  | 0,970202244 | 0,45  | 0,490650707 | 0,13  | 0,850300391 | -0,22 | 0,671346789 | -0,23 | 0,745134899 |
| Gm19710 | -0,1  | 0,909029335 | 0,3   | 0,827237618 | -0,71 | 0,400329879 | -0,1  | 0,924492971 | -0,13 | 0,906031862 |
| Gm19723 | -0,02 | 0,978017159 | 0,09  | 0,900801202 | 0,18  | 0,784439184 | 0,39  | 0,487659549 | 0,19  | 0,797293554 |
| Gm19733 | -0,14 | 0,814888638 | -0,21 | 0,74583457  | -0,08 | 0,926263109 | -0,07 | 0,868680052 | -0,19 | 0,741902552 |
| Gm19744 | -0,18 | 0,783985388 | 0,09  | 0,892916262 | -0,1  | 0,875486206 | -0,25 | 0,741608871 | -0,69 | 0,271967431 |
| Gm19757 | 0,04  | 0,95290436  | -0,03 | 0,956504634 | -0,19 | 0,713122331 | 0,13  | 0,722766722 | 0,17  | 0,769180513 |

|         |       |             |       |             |       |             |       |             |       |             |
|---------|-------|-------------|-------|-------------|-------|-------------|-------|-------------|-------|-------------|
| Gm1976  | 0,07  | 0,921111827 | 0,01  | 0,998237793 | 0,26  | 0,758166018 | 0,51  | 0,245429212 | 0,14  | 0,87233004  |
| Gm19760 | 0,28  | 0,757032046 | 0,42  | 0,351129314 | 0,27  | 0,628048897 | -0,46 | 0,393759175 | 0,18  | 0,91252831  |
| Gm19782 | 0,08  | 0,905414735 | 0,02  | 0,990251808 | -0,06 | 0,932706021 | -0,02 | 0,981596    | -0,17 | 0,801850849 |
| Gm19784 | -0,11 | 0,88671558  | -0,2  | 0,836404534 | -0,03 | 0,960677449 | -0,21 | 0,716994919 | 0,26  | 0,651115478 |
| Gm19816 | 0,7   | 0,565087223 | 0,05  | 0,945374636 | -0,93 | 0,107994175 | 0,14  | 0,797527363 | 0,71  | 0,311906172 |
| Gm19817 | -0,04 | 0,936051646 | 0,04  | 0,93451524  | 0,09  | 0,901823472 | 0,08  | 0,832934167 | 0,09  | 0,917844354 |
| Gm19825 | 0,01  | 0,991216662 | -0,08 | 0,866657821 | -0,15 | 0,783006    | 0,09  | 0,820395265 | 0,03  | 0,976743304 |
| Gm19835 | 0,22  | 0,683531628 | 0     | 0,998271266 | -0,46 | 0,500343254 | 0,02  | 0,967866794 | 0,04  | 0,961929311 |
| Gm19845 | 0,09  | 0,840909921 | -0,07 | 0,890813406 | -0,23 | 0,708335441 | 0     | 1           | -0,1  | 0,904836805 |
| Gm19854 | 0,15  | 0,782586323 | 0     | 1           | -0,18 | 0,770581496 | -0,11 | 0,810172317 | -0,05 | 0,953297732 |
| Gm19863 | 0,03  | 0,952948976 | 0,05  | 0,925777705 | -0,26 | 0,616307079 | -0,03 | 0,944558253 | 0,14  | 0,855741842 |
| Gm19866 | 0,29  | 0,692923111 | -0,01 | 0,984000632 | -0,05 | 0,967767582 | 0,31  | 0,504754586 | -0,43 | 0,442372286 |
| Gm19872 | -0,01 | 0,991919022 | -0,04 | 0,943915456 | -0,15 | 0,804784019 | 0,11  | 0,778901301 | 0,15  | 0,806603729 |
| Gm19897 | 0,15  | 0,721797378 | -0,02 | 0,983496065 | -0,02 | 0,977827235 | 0,15  | 0,746580621 | 0,06  | 0,939948423 |
| Gm19929 | 0,6   | 0,348784685 | -0,16 | 0,864363741 | 0,3   | 0,762358996 | -0,03 | 0,954910308 | 0,2   | 0,844265172 |
| Gm19935 | -0,2  | 0,650878862 | 0,31  | 0,589100557 | -0,03 | 0,970939073 | -0,02 | 0,980830219 | 0,12  | 0,879530216 |
| Gm19937 | 0,15  | 0,740529913 | 0,04  | 0,937424389 | -0,22 | 0,70834039  | 0,07  | 0,85072326  | -0,02 | 0,979456872 |
| Gm19939 | 0,11  | 0,810208393 | 0,02  | 0,974159037 | 0,03  | 0,973186233 | -0,01 | 0,986180586 | 0,15  | 0,83730774  |
| Gm1995  | 0,11  | 0,824010969 | 0,19  | 0,752038109 | 0,05  | 0,935978536 | -0,25 | 0,465862951 | -0,04 | 0,966268839 |
| Gm19956 | 0,11  | 0,827055517 | 0,06  | 0,926353869 | 0,07  | 0,931915249 | 0     | 0,99420889  | 0,12  | 0,865961223 |
| Gm19966 | -0,33 | 0,683531628 | -0,13 | 0,851329652 | -0,28 | 0,814575035 | 0,31  | 0,597708995 | 0,27  | 0,728346961 |
| Gm19967 | 0,13  | 0,864400092 | 0,15  | 0,831580851 | -0,01 | 0,995662132 | -0,61 | 0,509274266 | -0,45 | 0,731050468 |
| Gm19990 | 0,4   | 0,358933591 | 0,22  | 0,647475869 | -0,15 | 0,783147109 | 0,06  | 0,901395825 | 0,49  | 0,289343983 |
| Gm20005 | -0,08 | 0,928770547 | 0,1   | 0,907167997 | -0,27 | 0,736230294 | 0,12  | 0,781338312 | 0,38  | 0,74506541  |
| Gm20016 | 0     | 0,999075529 | 0,17  | 0,738335379 | -0,02 | 0,985347628 | 0,3   | 0,323734403 | 0,35  | 0,45660227  |
| Gm20036 | -0,12 | 0,845591898 | -0,07 | 0,896187678 | -0,15 | 0,830336321 | 0,42  | 0,319708329 | -0,11 | 0,876719251 |
| Gm20038 | 0,07  | 0,867692799 | 0,08  | 0,887631719 | -0,11 | 0,833493578 | 0,03  | 0,943143586 | 0,1   | 0,885872093 |
| Gm20043 | 0,26  | 0,796060547 | -0,09 | 0,935329426 | -0,19 | 0,834042944 | 0     | 1           | 0,11  | 0,900126162 |
| Gm2005  | 0,13  | 0,919567534 | 0,5   | 0,494161701 | -1,04 | 0,193368921 | 0,05  | 0,949293223 | -0,16 | 0,879072575 |
| Gm20063 | 0,27  | 0,551578148 | 0,07  | 0,893044986 | -0,05 | 0,956570063 | 0,08  | 0,869148815 | 0,31  | 0,789985499 |
| Gm20064 | 0,07  | 0,898206049 | 0,02  | 0,962617743 | 0,06  | 0,928065911 | -0,22 | 0,587590932 | -0,18 | 0,825966687 |
| Gm20083 | -0,06 | 0,900167606 | -0,09 | 0,855607772 | -0,17 | 0,795689651 | -0,05 | 0,937348194 | -0,16 | 0,814438115 |
| Gm20093 | 0,13  | 0,784951771 | 0     | 1           | -0,03 | 0,973186233 | 0,13  | 0,736423588 | 0,12  | 0,875614779 |
| Gm20098 | 0,06  | 0,928396151 | 0,01  | 0,99460836  | -0,05 | 0,957152002 | -0,02 | 0,963897766 | 0,08  | 0,92261128  |
| Gm20099 | 0     | 0,999549745 | 0,05  | 0,91472637  | -0,15 | 0,881924837 | -0,46 | 0,425337107 | 0,34  | 0,720312918 |



|         |       |             |       |             |       |             |       |             |       |             |
|---------|-------|-------------|-------|-------------|-------|-------------|-------|-------------|-------|-------------|
| Gm20100 | 0,31  | 0,807246565 | 0,31  | 0,69562011  | -0,25 | 0,681398968 | 0,27  | 0,69938772  | 0,18  | 0,855354002 |
| Gm2011  | 0,28  | 0,504621759 | -0,13 | 0,858395068 | 0,08  | 0,941063967 | 0,03  | 0,971404035 | 0,56  | 0,585244465 |
| Gm20110 | -0,19 | 0,745617945 | 0,03  | 0,952352299 | -0,09 | 0,911860447 | 0,3   | 0,698921024 | 0,22  | 0,835191    |
| Gm20115 | 0,6   | 0,290193729 | 0,22  | 0,697811585 | 0,02  | 0,993379272 | 0,26  | 0,406029112 | 0,2   | 0,808777689 |
| Gm20125 | 0,02  | 0,98344141  | 0,27  | 0,61193546  | 0,34  | 0,620837479 | -0,1  | 0,779093746 | 0,2   | 0,788761628 |
| Gm20139 | 0,25  | 0,54401985  | -0,26 | 0,537510632 | 0,06  | 0,936106999 | 0,03  | 0,966197507 | -0,4  | 0,583434544 |
| Gm20149 | 0,12  | 0,777335496 | -0,18 | 0,838368852 | 0,02  | 0,977306521 | 0,06  | 0,946205705 | 0,18  | 0,80222716  |
| Gm20157 | 0     | 0,995658455 | 0,02  | 0,969019461 | 0,26  | 0,747767515 | -0,04 | 0,947936692 | -0,18 | 0,823125838 |
| Gm20161 | 0,05  | 0,938106189 | -0,12 | 0,804394095 | -0,31 | 0,498063282 | 0     | 1           | 0,07  | 0,935493196 |
| Gm20169 | 0,39  | 0,42935185  | -0,19 | 0,756584634 | -0,3  | 0,649733839 | 0,3   | 0,512935647 | 0,25  | 0,698115018 |
| Gm20172 | 0,07  | 0,888366049 | -0,02 | 0,98230594  | -0,19 | 0,753240947 | -0,12 | 0,742944984 | -0,2  | 0,745574572 |
| Gm20187 | 0,18  | 0,766705553 | -0,42 | 0,600385993 | -0,02 | 0,983917018 | 0,31  | 0,39058196  | 0,01  | 0,995043594 |
| Gm20199 | 0,81  | 0,153824107 | 0,37  | 0,489608385 | -0,87 | 0,096515102 | -0,36 | 0,413953044 | 0,44  | 0,521691028 |
| Gm2022  | -0,1  | 0,9183905   | -0,21 | 0,774758897 | -0,25 | 0,755403453 | -0,26 | 0,651867609 | 0,19  | 0,83178796  |
| Gm20235 | 0,51  | 0,264905455 | 0,06  | 0,934508445 | -0,16 | 0,882526883 | 0,45  | 0,392258707 | 0,77  | 0,300742613 |
| Gm20236 | 0,2   | 0,772855197 | 0,08  | 0,934294134 | -0,15 | 0,911506558 | -0,71 | 0,121193897 | -0,07 | 0,957130917 |
| Gm20242 | -0,02 | 0,975949545 | -0,06 | 0,907217169 | -0,23 | 0,675674124 | 0,1   | 0,782187164 | 0,01  | 0,985269236 |
| Gm20255 | 0,12  | 0,800851935 | 0,18  | 0,682868943 | -0,01 | 0,991240121 | -0,09 | 0,817348489 | 0,18  | 0,831834722 |
| Gm20257 | -0,01 | 0,993175772 | -0,17 | 0,853162838 | -0,36 | 0,736837174 | -1,6  | 0,075379341 | 0,85  | 0,245859871 |
| Gm20262 | 0     | 0,997842309 | 0     | 0,998881563 | -0,1  | 0,856499205 | 0,03  | 0,953206567 | -0,08 | 0,923530475 |
| Gm20268 | 0,17  | 0,70137787  | 0,24  | 0,820806352 | 0,14  | 0,80210446  | -0,1  | 0,858708706 | -0,01 | 0,988374688 |
| Gm2027  | 0,01  | 0,986795639 | 0,16  | 0,852181157 | -0,11 | 0,897127882 | -0,23 | 0,64965626  | -0,16 | 0,80222716  |
| Gm20275 | 0,05  | 0,94727537  | -0,29 | 0,705624794 | -0,14 | 0,837999835 | 0,14  | 0,708604485 | 0,03  | 0,97425848  |
| Gm20276 | -0,05 | 0,926007268 | 0     | 1           | -0,12 | 0,872313115 | 0,03  | 0,94180692  | 0     | 0,99753219  |
| Gm20290 | 0,8   | 0,163088889 | 0,04  | 0,950643414 | -0,51 | 0,30182317  | 0,34  | 0,36769451  | 0,69  | 0,282689685 |
| Gm2030  | 0,34  | 0,772859736 | 0,39  | 0,765180904 | -0,2  | 0,904057901 | -0,27 | 0,84748792  | -0,25 | 0,874554354 |
| Gm20300 | 0,26  | 0,688313545 | -0,22 | 0,847363727 | 0,2   | 0,836779352 | -1,26 | 0,032252474 | -0,38 | 0,543422948 |
| Gm20310 | -0,11 | 0,840909921 | -0,35 | 0,467362999 | 0,87  | 0,342133315 | -0,06 | 0,893255574 | 0,15  | 0,831190498 |
| Gm20319 | 0,03  | 0,976574175 | -0,2  | 0,791640208 | -0,22 | 0,683395174 | 0,01  | 0,989926105 | 0,15  | 0,855354002 |
| Gm20324 | -0,42 | 0,442648859 | -0,11 | 0,828219939 | -0,16 | 0,783006    | 0,46  | 0,37151602  | 0,34  | 0,660121604 |
| Gm20325 | 0,16  | 0,893137556 | -0,02 | 0,970762922 | -0,42 | 0,68845998  | 0,06  | 0,896599656 | 0,16  | 0,856410489 |
| Gm20326 | 0,01  | 0,981777139 | -0,03 | 0,965147491 | 0,05  | 0,946528842 | 0,21  | 0,592457782 | 0,18  | 0,773401088 |
| Gm20328 | 0,17  | 0,677867423 | 0,01  | 0,994137877 | -0,1  | 0,855523214 | 0     | 0,994376209 | 0,31  | 0,523184505 |
| Gm20337 | 0,27  | 0,637135317 | 0,34  | 0,642151308 | -0,37 | 0,599127793 | 0,18  | 0,677265557 | 0,04  | 0,982175252 |
| Gm20356 | -0,07 | 0,904019418 | 0,15  | 0,716661568 | 0,02  | 0,976092199 | -0,04 | 0,926333875 | -0,07 | 0,946185373 |

|         |       |             |       |             |       |             |       |             |       |             |
|---------|-------|-------------|-------|-------------|-------|-------------|-------|-------------|-------|-------------|
| Gm20362 | 0,27  | 0,419180544 | 0,09  | 0,826165513 | -0,06 | 0,928115273 | -0,08 | 0,833801453 | -0,12 | 0,860545744 |
| Gm20371 | -0,08 | 0,885454906 | 0,03  | 0,958545812 | -0,06 | 0,928065911 | -0,06 | 0,893022174 | 0,03  | 0,973609004 |
| Gm20382 | 0,08  | 0,886891037 | 0     | 1           | -0,1  | 0,865361912 | 0,09  | 0,844720784 | -0,05 | 0,961406182 |
| Gm20383 | 0,02  | 0,969486005 | 0,08  | 0,846432276 | 0     | 0,998996411 | -0,17 | 0,750643604 | 0,04  | 0,973428839 |
| Gm20387 | -0,04 | 0,929651784 | 0,07  | 0,88325516  | 0,01  | 0,988640659 | 0,24  | 0,598657551 | 0,01  | 0,992370267 |
| Gm2042  | 0,43  | 0,586458491 | 0,12  | 0,919865797 | -0,03 | 0,969433423 | -0,35 | 0,791002513 | -0,36 | 0,80654047  |
| Gm20465 | -0,15 | 0,906075104 | -0,07 | 0,891099    | -0,09 | 0,917694073 | 0,15  | 0,768880868 | 0,17  | 0,874554354 |
| Gm20467 | -0,08 | 0,878822211 | -0,01 | 0,98859071  | -0,13 | 0,823823322 | -0,1  | 0,814797323 | -0,18 | 0,825564898 |
| Gm20476 | 0,25  | 0,580909375 | -0,06 | 0,968437059 | -0,24 | 0,700931261 | -0,01 | 0,988205241 | 0,2   | 0,752420653 |
| Gm20492 | 0,05  | 0,944828542 | 0,26  | 0,723989536 | -0,07 | 0,965656549 | -0,63 | 0,583362976 | -0,45 | 0,642782255 |
| Gm20501 | 0,19  | 0,683444889 | -0,17 | 0,718415174 | 0,07  | 0,915407865 | -0,2  | 0,584215902 | -0,03 | 0,97425848  |
| Gm20506 | 0,18  | 0,895871179 | 0,23  | 0,670644482 | -0,1  | 0,864664738 | -0,54 | 0,395715359 | 1,71  | 0,026270409 |
| Gm20511 | -0,02 | 0,976977482 | 0,05  | 0,926157704 | -0,17 | 0,844827602 | 0,29  | 0,675727528 | 0,21  | 0,841522773 |
| Gm20513 | 1,5   | 0,104092085 | 0,31  | 0,946182573 | -0,33 | 0,862892093 | 0,39  | 0,739157892 | 2,78  | 0,013431226 |
| Gm20544 | 0,31  | 0,600313897 | -0,32 | 0,628150395 | -0,47 | 0,582669192 | -0,5  | 0,385107597 | -0,28 | 0,727904814 |
| Gm20554 | 0     | 0,998769353 | 0,11  | 0,817110093 | -0,18 | 0,691646302 | 0     | 0,996287679 | -0,23 | 0,702558142 |
| Gm20555 | 0,32  | 0,67647563  | 0,12  | 0,820806352 | 0,34  | 0,702541777 | -0,11 | 0,768036061 | -0,32 | 0,626176831 |
| Gm20556 | 0,37  | 0,470397003 | 0,56  | 0,430658524 | 0,02  | 0,993379272 | 0,29  | 0,533498808 | 0,46  | 0,608004947 |
| Gm20557 | 0,18  | 0,760032001 | 0,29  | 0,732847182 | -0,05 | 0,959465468 | -0,16 | 0,701167068 | 0,29  | 0,574689193 |
| Gm20558 | 0,2   | 0,654459777 | 0,05  | 0,915213526 | 0,13  | 0,815942732 | 0     | 1           | 0,16  | 0,784375319 |
| Gm20559 | 0,81  | 0,060731662 | 1,06  | 0,078313776 | -0,84 | 0,19907753  | -0,63 | 0,083697169 | 1,03  | 0,030384337 |
| Gm20560 | 0,13  | 0,784951771 | 0,14  | 0,832369851 | -0,11 | 0,867524391 | -0,05 | 0,943864463 | 0,52  | 0,390679549 |
| Gm20594 | -0,06 | 0,910350967 | -0,06 | 0,938944149 | 0,04  | 0,962004214 | -0,12 | 0,832587841 | -0,19 | 0,787488862 |
| Gm20597 | -0,07 | 0,955200574 | 0,12  | 0,842824184 | -0,31 | 0,725191296 | 0     | 0,99361557  | -0,14 | 0,864540232 |
| Gm20604 | -0,34 | 0,647443044 | -0,19 | 0,823246376 | 0,46  | 0,324602896 | 0,17  | 0,786750698 | -0,18 | 0,844079844 |
| Gm2061  | -0,01 | 0,992399046 | 0,03  | 0,945143056 | -0,33 | 0,512995479 | -0,04 | 0,926333875 | -0,06 | 0,946155238 |
| Gm20611 | 0,55  | 0,316599006 | 0,41  | 0,499573414 | 0,13  | 0,846482573 | -0,43 | 0,351209856 | -0,42 | 0,464952461 |
| Gm20735 | -0,18 | 0,832358531 | -0,36 | 0,619709049 | -0,38 | 0,36193667  | 0,26  | 0,698586319 | 0,1   | 0,928764431 |
| Gm20740 | 0,15  | 0,685826767 | 0,1   | 0,905051067 | 0,15  | 0,850868333 | 0,17  | 0,769374738 | -0,02 | 0,980961333 |
| Gm20741 | 0,06  | 0,895871179 | 0     | 1           | -0,12 | 0,852300912 | 0,09  | 0,815939904 | 0,09  | 0,927536545 |
| Gm20742 | -0,05 | 0,929634502 | -0,08 | 0,87095497  | -0,01 | 0,990836784 | 0,23  | 0,645842474 | 0,02  | 0,986720141 |
| Gm20743 | -0,13 | 0,846840544 | -0,15 | 0,882589938 | 0,07  | 0,904239687 | 0,35  | 0,604706394 | 0,46  | 0,549449827 |
| Gm20744 | 0,04  | 0,953003466 | -0,14 | 0,897811179 | -0,02 | 0,984498781 | 0,02  | 0,963752888 | -0,05 | 0,952753183 |
| Gm20745 | 0,1   | 0,848224885 | 0,01  | 0,993515841 | -0,1  | 0,884861819 | -0,16 | 0,718343218 | -0,1  | 0,898185407 |
| Gm20750 | -0,24 | 0,656726345 | 0,24  | 0,807175471 | -0,12 | 0,906709737 | 0,79  | 0,247604143 | 0,11  | 0,913274952 |

|         |       |             |       |             |       |             |       |             |       |             |
|---------|-------|-------------|-------|-------------|-------|-------------|-------|-------------|-------|-------------|
| Gm20751 | 0,21  | 0,578691586 | 0,04  | 0,948048585 | 0,04  | 0,963221639 | -0,2  | 0,563446734 | -0,2  | 0,774809032 |
| Gm20752 | -0,17 | 0,856959665 | 0,44  | 0,582478031 | -0,08 | 0,935692179 | -0,76 | 0,164193077 | 0,24  | 0,779920985 |
| Gm20753 | 0,12  | 0,845437504 | -0,13 | 0,852461907 | -0,12 | 0,924717315 | -0,15 | 0,704328661 | -0,34 | 0,626540936 |
| Gm20754 | -0,2  | 0,783591449 | -0,21 | 0,690627372 | -0,11 | 0,880706627 | 0,09  | 0,812048135 | -0,05 | 0,953674872 |
| Gm20755 | 0,35  | 0,526698411 | 0,01  | 0,997344247 | -0,03 | 0,97548193  | 0,08  | 0,827219751 | -0,03 | 0,973382116 |
| Gm20756 | 0,19  | 0,78476082  | -0,08 | 0,940161762 | -0,4  | 0,678840444 | -0,43 | 0,644491109 | -0,74 | 0,523096376 |
| Gm20757 | 0,02  | 0,97905075  | -0,21 | 0,682062089 | -0,15 | 0,819233853 | 0,11  | 0,798441226 | -0,11 | 0,874688007 |
| Gm20758 | 0,2   | 0,66317593  | 0,26  | 0,543685328 | -0,11 | 0,909963525 | -0,33 | 0,665063395 | -0,21 | 0,835817348 |
| Gm20759 | 0,23  | 0,790282811 | 0     | 1           | 0,08  | 0,943788892 | 0,46  | 0,39124085  | 0,48  | 0,499316701 |
| Gm20764 | 0,3   | 0,465168175 | 0,12  | 0,798523336 | -0,09 | 0,909963525 | 0,18  | 0,617056035 | 0,14  | 0,854494093 |
| Gm20767 | 0,16  | 0,848224885 | 0,06  | 0,932292974 | -0,13 | 0,849697489 | -0,1  | 0,798741105 | -0,11 | 0,885777129 |
| Gm20815 | -0,15 | 0,829713101 | 0,44  | 0,426168855 | 0,03  | 0,960666071 | -0,07 | 0,846390866 | 0,24  | 0,647175712 |
| Gm20822 | 0,07  | 0,891309235 | 0,03  | 0,95830747  | -0,02 | 0,977126842 | -0,01 | 0,989926105 | -0,25 | 0,68987325  |
| Gm20830 | 0,11  | 0,895278749 | -0,32 | 0,568282579 | 0,27  | 0,574724946 | 0,49  | 0,152938593 | 0,05  | 0,956610289 |
| Gm20852 | -0,07 | 0,923749064 | -0,09 | 0,855187815 | -0,03 | 0,978694368 | 0     | 1           | -0,11 | 0,893439982 |
| Gm20897 | 0,04  | 0,949362206 | 0,24  | 0,77875496  | 0,34  | 0,489683254 | -0,02 | 0,972656417 | 0,05  | 0,954565959 |
| Gm20939 | 0,13  | 0,960720096 | -0,09 | 0,959685428 | -0,45 | 0,57717258  | 0,35  | 0,902657593 | 0,59  | 0,843846988 |
| Gm21002 | 0,41  | 0,357036798 | 0,31  | 0,880473303 | 0,19  | 0,838242917 | 0,05  | 0,968311421 | 0,37  | 0,549181666 |
| Gm2102  | -0,04 | 0,963914207 | 0,13  | 0,892260328 | -0,04 | 0,963199274 | -0,12 | 0,75887854  | 0,1   | 0,883738739 |
| Gm21057 | 0,13  | 0,785669218 | 0,02  | 0,972482322 | 0,23  | 0,698170879 | -0,39 | 0,400733868 | -0,58 | 0,424875632 |
| Gm21075 | -0,78 | 0,187087108 | -0,13 | 0,809683705 | -0,08 | 0,961464515 | -0,04 | 0,926386785 | 0,17  | 0,86229485  |
| Gm2109  | 0,31  | 0,593540946 | -0,02 | 0,984962061 | 0,04  | 0,966910505 | 0,17  | 0,706434903 | -0,09 | 0,915531686 |
| Gm21115 | -0,15 | 0,792367608 | -0,04 | 0,928134372 | -0,12 | 0,906780086 | 0,21  | 0,618209904 | 0,07  | 0,918529364 |
| Gm21119 | 0,09  | 0,909885273 | 0,18  | 0,731905282 | -0,65 | 0,452731181 | -0,99 | 0,270661824 | -1,22 | 0,203422529 |
| Gm21123 | 0,14  | 0,776418033 | 0,15  | 0,927073711 | 0,27  | 0,70130819  | -0,02 | 0,972627967 | -0,18 | 0,794840052 |
| Gm21129 | 0,36  | 0,340214072 | 0,26  | 0,532411047 | -0,07 | 0,911634383 | -0,24 | 0,455883516 | 0,31  | 0,581802025 |
| Gm2115  | -0,18 | 0,760717996 | -0,22 | 0,613344994 | 0,28  | 0,594276411 | 0,54  | 0,372503505 | 0,1   | 0,918170806 |
| Gm21158 | -0,37 | 0,85582792  | -0,62 | 0,818889977 | 0,1   | 0,97463485  | 0,98  | 0,326125991 | 0,94  | 0,587305934 |
| Gm21188 | -0,05 | 0,936871609 | 0,41  | 0,716732926 | -0,22 | 0,877714146 | -0,03 | 0,965471779 | -0,21 | 0,831295704 |
| Gm21190 | 0,08  | 0,943239632 | -0,18 | 0,747928263 | -0,66 | 0,500343254 | 0,02  | 0,978760597 | 0,13  | 0,900126162 |
| Gm21221 | 0,16  | 0,803337362 | -0,38 | 0,629486849 | 0,06  | 0,948637233 | 0,27  | 0,529366123 | 0,05  | 0,950267521 |
| Gm21269 | -0,08 | 0,926007268 | 0,15  | 0,785244931 | 0     | 0,999931921 | -0,1  | 0,80795564  | 0,04  | 0,969617491 |
| Gm21276 | -0,37 | 0,460231397 | 0,04  | 0,980309105 | -0,01 | 0,994008884 | -0,43 | 0,437576429 | 0,02  | 0,985269236 |
| Gm2128  | 0,03  | 0,957427783 | 0,18  | 0,747928263 | -0,08 | 0,90569262  | -0,06 | 0,895579969 | 0,44  | 0,570939418 |
| Gm21283 | -0,11 | 0,829299665 | 0,11  | 0,862088357 | -0,39 | 0,420043356 | 0,07  | 0,895836916 | 0,53  | 0,314948828 |

|         |       |             |       |             |       |             |       |             |       |             |
|---------|-------|-------------|-------|-------------|-------|-------------|-------|-------------|-------|-------------|
| Gm21284 | 0,21  | 0,758636946 | -0,32 | 0,702527003 | 0,25  | 0,611144549 | 0,24  | 0,696843539 | -0,09 | 0,917565813 |
| Gm21388 | -0,14 | 0,820785667 | 0,18  | 0,722938629 | -0,38 | 0,56948206  | 0,15  | 0,726953267 | -0,53 | 0,574285481 |
| Gm2155  | -0,08 | 0,862322913 | -0,11 | 0,827496723 | 0,03  | 0,973732268 | -0,11 | 0,793099857 | -0,37 | 0,480757455 |
| Gm21616 | 0,02  | 0,991190832 | -0,79 | 0,535950767 | 0,15  | 0,924836701 | 0,09  | 0,984966598 | -0,73 | 0,839824817 |
| Gm21680 | 0,67  | 0,640077836 | 0,57  | 0,777930951 | -0,74 | 0,325181898 | -0,87 | 0,476414891 | 0,07  | 0,968347227 |
| Gm21691 | -0,26 | 0,687662951 | 0,09  | 0,937377463 | -0,1  | 0,9113279   | -0,22 | 0,555440369 | -0,12 | 0,901174282 |
| Gm2176  | 0,26  | 0,592682585 | -0,16 | 0,716661568 | -0,76 | 0,333333292 | 0,18  | 0,764489444 | -0,13 | 0,886027227 |
| Gm21944 | -0,07 | 0,882500171 | -0,07 | 0,930849936 | -0,03 | 0,970387898 | 0,05  | 0,9221298   | -0,16 | 0,820657685 |
| Gm21948 | -0,26 | 0,859337079 | -0,94 | 0,568304052 | -1,12 | 0,351563528 | 1,17  | 0,368853364 | 0,14  | 0,925226919 |
| Gm22    | 0,11  | 0,817366963 | 0,04  | 0,938638797 | 0,07  | 0,919116989 | 0,05  | 0,914828446 | 0,05  | 0,967522546 |
| Gm2287  | -0,07 | 0,919976531 | 0,23  | 0,825162812 | -0,24 | 0,700061351 | -0,86 | 0,190917389 | -0,8  | 0,217360334 |
| Gm2366  | -0,13 | 0,762433362 | -0,23 | 0,729423334 | -0,05 | 0,954453764 | 0,17  | 0,708013098 | -0,04 | 0,95985938  |
| Gm23711 | 0,77  | 0,46799262  | -0,07 | 0,932338539 | 0,61  | 0,425782502 | 0,67  | 0,305286957 | 0,27  | 0,726339638 |
| Gm2381  | -0,03 | 0,97905075  | 0,22  | 0,764289173 | -0,14 | 0,79417478  | -0,1  | 0,829596652 | -0,07 | 0,931666842 |
| Gm2411  | -0,12 | 0,867243066 | -0,07 | 0,882847123 | 0,04  | 0,978255748 | 0,05  | 0,90213506  | 0,15  | 0,901950867 |
| Gm24148 | -0,29 | 0,790449291 | 0,17  | 0,855607772 | -0,85 | 0,342804036 | -0,35 | 0,642906557 | 0,31  | 0,859663155 |
| Gm24208 | 0,44  | 0,517248758 | 0,08  | 0,927073711 | -0,2  | 0,774521073 | -0,2  | 0,600543496 | 0,27  | 0,59741971  |
| Gm2427  | 0,92  | 0,242651292 | 1,44  | 0,13937019  | 0,23  | 0,905789427 | 0,42  | 0,639765346 | 2,58  | 0,01166388  |
| Gm2436  | -0,32 | 0,531870009 | -0,05 | 0,97761641  | 0,3   | 0,786838878 | 0,03  | 0,978056041 | 0,41  | 0,635418734 |
| Gm24463 | -0,06 | 0,953324702 | 0,44  | 0,549813959 | -0,1  | 0,944441051 | 0,16  | 0,900277174 | 0,4   | 0,822709063 |
| Gm2447  | 0,16  | 0,829299665 | -0,15 | 0,807100558 | -0,06 | 0,937802036 | 0,06  | 0,905614221 | 0,14  | 0,854369491 |
| Gm2449  | 0,31  | 0,681371768 | 0,13  | 0,844512244 | -0,35 | 0,489556221 | -0,12 | 0,889890514 | 0,36  | 0,654129233 |
| Gm2479  | 0,24  | 0,81266486  | -0,5  | 0,276578805 | -0,06 | 0,934357467 | 0,52  | 0,209827616 | 0,46  | 0,380694619 |
| Gm2483  | 0,01  | 0,99027618  | -0,32 | 0,482507034 | -0,16 | 0,777417583 | 0,3   | 0,468566806 | -0,12 | 0,836205142 |
| Gm2516  | -0,27 | 0,732973296 | -0,15 | 0,812156621 | -0,06 | 0,938771378 | -0,27 | 0,598261912 | -0,11 | 0,916749354 |
| Gm2518  | -0,24 | 0,778869381 | -0,03 | 0,954829926 | -0,5  | 0,475690033 | -0,07 | 0,891253074 | -0,05 | 0,954657649 |
| Gm2545  | -0,05 | 0,908272477 | 0,51  | 0,395557883 | 0,1   | 0,895520077 | -0,14 | 0,679945613 | -0,19 | 0,765809384 |
| Gm26510 | 0,55  | 0,422668323 | 0,47  | 0,428093777 | 0,26  | 0,845321518 | -0,15 | 0,825319974 | 0,73  | 0,223294439 |
| Gm26511 | 0,04  | 0,934722335 | 0,43  | 0,521685055 | 0,05  | 0,967304745 | -0,36 | 0,522894482 | -0,03 | 0,977599806 |
| Gm26512 | 0,12  | 0,864526424 | -0,03 | 0,982047684 | -0,05 | 0,944254689 | 0,04  | 0,960944731 | -0,26 | 0,748710615 |
| Gm26515 | -0,07 | 0,889411759 | -0,22 | 0,749674871 | -0,24 | 0,736837174 | 0,5   | 0,289958384 | -0,04 | 0,969994712 |
| Gm26519 | -0,09 | 0,898269435 | -0,22 | 0,804166367 | 0,27  | 0,628048897 | 0,13  | 0,814762053 | -0,63 | 0,439301508 |
| Gm26520 | 0,03  | 0,963914207 | 0,09  | 0,88052282  | -0,04 | 0,963725374 | 0,07  | 0,870983745 | 0,08  | 0,91049199  |
| Gm26534 | -0,01 | 0,988674093 | 0,01  | 0,995350053 | -0,04 | 0,95204022  | -0,32 | 0,40199632  | 0,01  | 0,991628025 |
| Gm26535 | -0,18 | 0,838825457 | -0,43 | 0,701492683 | -0,2  | 0,823823322 | -0,1  | 0,876351198 | -0,16 | 0,889884382 |

|         |       |             |       |             |       |             |       |             |       |             |
|---------|-------|-------------|-------|-------------|-------|-------------|-------|-------------|-------|-------------|
| Gm26544 | 0,03  | 0,957427783 | 0,61  | 0,426168855 | -0,08 | 0,939681612 | 0,28  | 0,490176405 | 0,12  | 0,876418697 |
| Gm26550 | -0,07 | 0,923500418 | 0,41  | 0,493080796 | 0,08  | 0,938291859 | -0,25 | 0,52980423  | 0,09  | 0,909363599 |
| Gm26555 | 0,57  | 0,666515069 | 0,6   | 0,664446076 | 0,11  | 0,906275304 | -0,19 | 0,67393182  | 0,18  | 0,911780802 |
| Gm26559 | -0,08 | 0,878097545 | -0,07 | 0,916730432 | -0,19 | 0,721369858 | -0,32 | 0,514962191 | -0,31 | 0,66608849  |
| Gm26560 | 0,06  | 0,943576038 | 0,2   | 0,823530278 | -0,22 | 0,701878082 | -0,15 | 0,832134224 | -0,14 | 0,862456985 |
| Gm26562 | 0,27  | 0,471686307 | 0,07  | 0,879858918 | 0,26  | 0,62535327  | -0,02 | 0,961864701 | 0,02  | 0,979338129 |
| Gm26569 | -0,34 | 0,469692532 | 0,13  | 0,909870621 | 0,31  | 0,685841838 | -0,1  | 0,839333217 | -0,33 | 0,605816363 |
| Gm26574 | 0,13  | 0,754698324 | 0,07  | 0,916730432 | -0,04 | 0,953951069 | -0,06 | 0,890793693 | -0,08 | 0,900212688 |
| Gm26578 | 0,02  | 0,964378908 | 0,01  | 0,985151214 | 0,01  | 0,989491273 | -0,04 | 0,932315462 | -0,03 | 0,973333131 |
| Gm26579 | 0,05  | 0,930612466 | 0,13  | 0,812406561 | -0,22 | 0,722200437 | -0,31 | 0,658351829 | 0,05  | 0,965141509 |
| Gm26583 | -0,07 | 0,948926586 | -0,19 | 0,707476481 | -0,55 | 0,368620918 | -0,58 | 0,386914893 | -0,64 | 0,493920965 |
| Gm26588 | -0,08 | 0,890974575 | -0,06 | 0,974507049 | -0,59 | 0,507829679 | 0,19  | 0,69560092  | -0,54 | 0,347427589 |
| Gm26592 | -0,3  | 0,518267881 | -0,02 | 0,97196542  | -0,11 | 0,843617662 | 0,1   | 0,834214104 | -0,03 | 0,980961333 |
| Gm26597 | 0,1   | 0,844095084 | -0,13 | 0,859223551 | 0,21  | 0,68845998  | 0,01  | 0,993337409 | -0,05 | 0,952971656 |
| Gm266   | -0,06 | 0,917337233 | 0,08  | 0,864989815 | -0,15 | 0,787011462 | -0,29 | 0,55503653  | -0,14 | 0,886027227 |
| Gm26604 | -0,3  | 0,546287705 | -0,16 | 0,693747709 | 0,09  | 0,902488931 | 0,13  | 0,801930792 | 0,11  | 0,91314596  |
| Gm26608 | -0,2  | 0,7494877   | -0,43 | 0,625784044 | -0,29 | 0,697080187 | 0,35  | 0,401977439 | 0,04  | 0,960974478 |
| Gm26611 | -0,58 | 0,410041925 | -0,13 | 0,855632384 | -0,12 | 0,910060392 | 1,44  | 0,013834788 | 0,51  | 0,369835412 |
| Gm26614 | 0,18  | 0,673270664 | 0,04  | 0,964875723 | 0,17  | 0,822609079 | -0,11 | 0,805169421 | -0,2  | 0,735152891 |
| Gm26615 | -0,05 | 0,966775766 | 0,21  | 0,89034555  | 0,2   | 0,830336321 | -0,24 | 0,57372642  | -0,06 | 0,953297732 |
| Gm26626 | -0,13 | 0,79119595  | -0,24 | 0,656294004 | 0,18  | 0,726329241 | 0,3   | 0,532176478 | 0,33  | 0,498803884 |
| Gm26627 | -0,13 | 0,78150395  | 0,01  | 0,990052916 | -0,09 | 0,915478462 | 0,21  | 0,602988996 | -0,13 | 0,873997452 |
| Gm26628 | 0,03  | 0,979130815 | -0,05 | 0,98459889  | -0,17 | 0,806781799 | -0,37 | 0,47599855  | -0,12 | 0,876666201 |
| Gm26629 | -0,02 | 0,978347418 | -0,19 | 0,683509429 | 0,08  | 0,921956183 | 0,22  | 0,664421412 | 0,06  | 0,953297732 |
| Gm2663  | -0,16 | 0,854484314 | -0,42 | 0,554469164 | 0,27  | 0,813110365 | -0,2  | 0,896599656 | 0,12  | 0,954565959 |
| Gm26632 | 0,12  | 0,795659022 | 0,07  | 0,892194304 | -0,09 | 0,881461218 | 0,01  | 0,986412644 | -0,02 | 0,982779069 |
| Gm26633 | 0,45  | 0,264937591 | -0,22 | 0,613429827 | -0,18 | 0,875486206 | 0,4   | 0,454200827 | 0,09  | 0,905758282 |
| Gm26634 | 0,11  | 0,831103991 | 0,07  | 0,870989562 | -0,09 | 0,887769873 | 0,01  | 0,991962381 | 0,27  | 0,666758661 |
| Gm26641 | 0,39  | 0,513299782 | 0,04  | 0,961333446 | 0,21  | 0,707571856 | -0,16 | 0,832900538 | 0,33  | 0,675282484 |
| Gm26644 | 0,01  | 0,986795639 | 0,01  | 0,986782918 | 0,03  | 0,97548193  | 0,18  | 0,681070159 | -0,02 | 0,982175252 |
| Gm26651 | -0,26 | 0,690085958 | 0,25  | 0,820023579 | 0,11  | 0,873628189 | 0,04  | 0,944456192 | 0,18  | 0,828679046 |
| Gm26653 | 0,07  | 0,905414735 | 0,04  | 0,958314419 | 0,01  | 0,996111139 | -0,01 | 0,980724248 | 0,05  | 0,954657649 |
| Gm26663 | 0,18  | 0,724736278 | 0,33  | 0,692197518 | 0,18  | 0,77186504  | -0,16 | 0,857910103 | 0,36  | 0,449613118 |
| Gm26664 | 0,05  | 0,950930226 | -0,03 | 0,979551751 | -0,01 | 0,994886496 | -0,62 | 0,286855307 | -0,5  | 0,321280802 |
| Gm26671 | 0,03  | 0,965666543 | -0,15 | 0,857490594 | 0,1   | 0,923350407 | 0,1   | 0,845966819 | -0,04 | 0,955948201 |

|         |       |             |       |             |       |             |       |             |       |             |
|---------|-------|-------------|-------|-------------|-------|-------------|-------|-------------|-------|-------------|
| Gm26676 | 0,1   | 0,851543807 | -0,2  | 0,753873417 | -0,12 | 0,865145801 | 0,32  | 0,375607237 | 0,2   | 0,746431548 |
| Gm26679 | -0,16 | 0,80069977  | -0,14 | 0,912516873 | -0,29 | 0,589451508 | 0,28  | 0,557984429 | 0,47  | 0,498598092 |
| Gm26684 | -0,14 | 0,857585372 | 0,25  | 0,68442935  | 0,11  | 0,887429895 | 0,22  | 0,885958674 | 0,12  | 0,946463658 |
| Gm26685 | -0,09 | 0,864715022 | -0,06 | 0,916042399 | 0,03  | 0,978840171 | 0,06  | 0,898690469 | 0,15  | 0,829444633 |
| Gm26688 | -0,13 | 0,836344315 | 0,11  | 0,828818891 | -0,02 | 0,982305856 | 0,04  | 0,948515439 | 0,4   | 0,562557824 |
| Gm26698 | 0     | 0,996998625 | 0,18  | 0,793842674 | -0,11 | 0,908400411 | -0,72 | 0,060224186 | -0,34 | 0,716229308 |
| Gm2670  | -0,2  | 0,778869381 | -0,27 | 0,62622372  | 0     | 0,997779809 | 0,22  | 0,695232035 | -0,01 | 0,990091016 |
| Gm26703 | -0,23 | 0,739833092 | 0,22  | 0,756778611 | 0,16  | 0,815951038 | 0,13  | 0,698362346 | -0,49 | 0,338032287 |
| Gm26704 | -0,04 | 0,944991778 | 0,1   | 0,825210924 | -0,07 | 0,932866273 | -0,04 | 0,921453285 | 0,02  | 0,984065984 |
| Gm26705 | -0,08 | 0,92450321  | 0,53  | 0,391122953 | -0,61 | 0,388931947 | -0,3  | 0,731340428 | -0,09 | 0,939127163 |
| Gm26708 | -0,01 | 0,991919022 | -0,02 | 0,993068441 | 0,11  | 0,861307315 | 0,44  | 0,469374878 | 0,22  | 0,808178104 |
| Gm26710 | -0,18 | 0,708296676 | -0,31 | 0,538283657 | -0,55 | 0,592642641 | 0,24  | 0,769701225 | -0,47 | 0,527815148 |
| Gm26717 | -0,14 | 0,761457464 | -0,21 | 0,67579931  | -0,18 | 0,756274956 | 0,3   | 0,454418988 | -0,18 | 0,765340194 |
| Gm26721 | -0,3  | 0,691658566 | 0,1   | 0,858860016 | -0,5  | 0,488218852 | 0     | 0,998710655 | -0,11 | 0,911850421 |
| Gm26728 | 0,17  | 0,733130683 | -0,09 | 0,926157704 | 0,05  | 0,937096585 | 0,1   | 0,848434672 | -0,1  | 0,884248437 |
| Gm26730 | 0,44  | 0,257383145 | 0,25  | 0,602956592 | -0,17 | 0,757498725 | -0,12 | 0,71158821  | 0,23  | 0,660121604 |
| Gm26744 | 0,28  | 0,743593944 | 0,02  | 0,9860901   | -0,29 | 0,539901272 | 0,12  | 0,845813504 | 0,1   | 0,900126162 |
| Gm26748 | -0,59 | 0,511005771 | 0,11  | 0,880473303 | -0,03 | 0,97674065  | 0,09  | 0,926898299 | 0,38  | 0,731527639 |
| Gm26752 | -0,53 | 0,496008309 | 0,56  | 0,298168653 | 0,18  | 0,841563482 | -0,26 | 0,733598985 | 0,02  | 0,989179767 |
| Gm26756 | 0,99  | 0,615015989 | -0,21 | 0,811889518 | -0,19 | 0,888101179 | 0,04  | 0,940292598 | 0,23  | 0,726042963 |
| Gm26760 | 0,35  | 0,389909576 | -0,26 | 0,790033542 | 0,22  | 0,674349954 | -0,13 | 0,932800758 | -0,17 | 0,91314596  |
| Gm26777 | -0,24 | 0,746700079 | -0,18 | 0,842663656 | 0,08  | 0,940068173 | -0,02 | 0,985580087 | -0,44 | 0,513517573 |
| Gm26782 | -0,06 | 0,952599412 | -0,23 | 0,583200444 | -0,18 | 0,826490386 | 0,29  | 0,398787938 | -0,39 | 0,501644357 |
| Gm26787 | 0,23  | 0,747663533 | 0,28  | 0,629493333 | 0     | 0,999931921 | 0,13  | 0,818693228 | 0,19  | 0,873662525 |
| Gm26788 | 0,11  | 0,833275012 | 0,07  | 0,953034887 | -0,26 | 0,700441358 | 0,21  | 0,628879523 | 0,01  | 0,992607235 |
| Gm26802 | -0,04 | 0,979962175 | -0,05 | 0,943915456 | 0,27  | 0,877023506 | -0,83 | 0,09653984  | -0,72 | 0,369829413 |
| Gm26803 | 0,17  | 0,777335496 | -0,27 | 0,500929303 | -0,09 | 0,902672106 | -0,14 | 0,665316336 | -0,28 | 0,601753447 |
| Gm26806 | 0,26  | 0,490517442 | 0,05  | 0,923044405 | 0     | 0,997889798 | 0,02  | 0,970931237 | 0,1   | 0,912250982 |
| Gm26820 | -0,4  | 0,492894586 | 0,15  | 0,904651548 | 0,25  | 0,82622365  | 0,31  | 0,43562878  | 0,3   | 0,794586838 |
| Gm26838 | 0,25  | 0,816465857 | 0,66  | 0,583200444 | -0,27 | 0,806044178 | -0,16 | 0,756234302 | 0,21  | 0,844105751 |
| Gm26839 | 0,06  | 0,946571826 | 0,12  | 0,904467069 | -0,33 | 0,528322067 | -0,01 | 0,976663465 | -0,05 | 0,952206434 |
| Gm26843 | 0,22  | 0,593510013 | 0,04  | 0,932292974 | -0,03 | 0,973006385 | -0,17 | 0,78049009  | -0,15 | 0,862456985 |
| Gm26849 | 0     | 0,995013944 | -0,05 | 0,910688765 | 0,06  | 0,947881687 | -0,13 | 0,750749528 | -0,35 | 0,562348217 |
| Gm26851 | -0,1  | 0,820785667 | -0,09 | 0,851133467 | -0,22 | 0,757498725 | 0,41  | 0,301482976 | 0,07  | 0,937558003 |
| Gm26853 | 0,11  | 0,919758492 | -0,53 | 0,467362999 | 0,42  | 0,505164267 | 0,29  | 0,578896547 | 0,08  | 0,940438527 |

|         |       |             |       |             |       |             |       |             |       |             |
|---------|-------|-------------|-------|-------------|-------|-------------|-------|-------------|-------|-------------|
| Gm26868 | 0,02  | 0,973883276 | 0,05  | 0,956830129 | -0,21 | 0,641366948 | 0,03  | 0,971334673 | 0,39  | 0,456564217 |
| Gm26873 | -0,11 | 0,865689677 | 0,14  | 0,884434898 | 0,08  | 0,911894304 | -0,05 | 0,935095541 | 0,41  | 0,546863793 |
| Gm26876 | -0,04 | 0,949236157 | 0,05  | 0,931100468 | -0,04 | 0,956894731 | -0,2  | 0,547681234 | 0,23  | 0,665922617 |
| Gm26881 | 0,34  | 0,482531929 | 0,08  | 0,855974935 | -0,49 | 0,385794091 | -0,04 | 0,965565431 | -0,35 | 0,757184082 |
| Gm26908 | 0,26  | 0,657124524 | 0,38  | 0,649491808 | -0,33 | 0,709222239 | -1,3  | 0,378102359 | -0,01 | 0,996891855 |
| Gm26910 | 0,09  | 0,874688734 | 0,33  | 0,693906911 | -0,37 | 0,715403033 | -1,39 | 0,07508796  | -0,13 | 0,91314596  |
| Gm26911 | 0,09  | 0,859337079 | 0,08  | 0,855632384 | 0,03  | 0,967930981 | -0,18 | 0,621496945 | -0,06 | 0,935808074 |
| Gm2694  | 0,44  | 0,428112683 | -0,03 | 0,970020205 | -0,49 | 0,377411231 | -0,05 | 0,957573971 | -0,13 | 0,928724353 |
| Gm2696  | 0,03  | 0,957427783 | 0,27  | 0,640299669 | -0,42 | 0,390712075 | -0,32 | 0,529428359 | -0,16 | 0,868885372 |
| Gm2716  | 0,11  | 0,905414735 | -0,26 | 0,727238755 | -0,59 | 0,354279604 | 0,46  | 0,325923875 | 0,35  | 0,542367521 |
| Gm2721  | 0,37  | 0,556436912 | -0,01 | 0,999210601 | -0,18 | 0,708876309 | 0,09  | 0,90213506  | 0,07  | 0,947559952 |
| Gm2762  | -0,5  | 0,421029929 | -0,03 | 0,975836193 | 0,01  | 0,993686224 | 0,08  | 0,902632056 | -0,45 | 0,583434544 |
| Gm2799  | 0,47  | 0,301230942 | 0,35  | 0,430316094 | -0,14 | 0,865148119 | -0,6  | 0,197435449 | 0,6   | 0,251771039 |
| Gm2800  | 0,02  | 0,990894139 | -0,06 | 0,905696294 | -0,33 | 0,468912883 | -0,13 | 0,736423588 | 0,07  | 0,92741476  |
| Gm28194 | 0,26  | 0,736503749 | -0,12 | 0,906040916 | -0,44 | 0,361270275 | -0,18 | 0,72505895  | -0,25 | 0,861056054 |
| Gm2824  | 0,27  | 0,701627731 | 0,09  | 0,851610126 | 0,18  | 0,754826787 | -0,25 | 0,612222529 | 0,47  | 0,321199383 |
| Gm2825  | 0,2   | 0,802029256 | 0,17  | 0,922434913 | -0,08 | 0,911506558 | -0,37 | 0,507630384 | -0,32 | 0,554975763 |
| Gm2837  | -0,39 | 0,448008565 | 0,19  | 0,775914311 | -0,41 | 0,5092632   | -0,36 | 0,475272978 | -0,59 | 0,276728769 |
| Gm2848  | -0,11 | 0,848837214 | -0,37 | 0,487771533 | -0,16 | 0,767681595 | 0,19  | 0,805169421 | -0,02 | 0,984724142 |
| Gm28626 | 0,01  | 0,993728727 | 0,01  | 0,997434478 | -0,32 | 0,435912023 | 0     | 0,996451727 | 0,11  | 0,885318142 |
| Gm2863  | 0,2   | 0,727387897 | 0,42  | 0,568304052 | -0,09 | 0,912268947 | -0,16 | 0,677875835 | 0,28  | 0,592505698 |
| Gm28645 | 0,22  | 0,618050407 | -0,05 | 0,922399849 | -0,2  | 0,732675311 | 0,17  | 0,702534189 | 0,08  | 0,917844354 |
| Gm2897  | 0,72  | 0,302609278 | 0,76  | 0,313570544 | -0,09 | 0,909717677 | -0,13 | 0,848431901 | 0,33  | 0,608004947 |
| Gm29376 | -0,17 | 0,701297763 | 0,09  | 0,903089182 | -0,03 | 0,981728622 | 0     | 0,999809258 | -0,26 | 0,651115478 |
| Gm29692 | 0,33  | 0,740082515 | -0,21 | 0,891030018 | 0,22  | 0,747599709 | 0,09  | 0,920036779 | -0,17 | 0,879206646 |
| Gm29719 | 0,28  | 0,928103232 | 1,17  | 0,370515616 | -0,16 | 0,906709737 | -0,36 | 0,852446647 | 0,74  | 0,625751363 |
| Gm29875 | 0,16  | 0,814334273 | -0,48 | 0,325242663 | 0     | 0,999329448 | 0,23  | 0,597332937 | -0,06 | 0,94919447  |
| Gm2990  | 0,06  | 0,93113484  | 0     | 0,999210601 | -0,23 | 0,614757107 | 0,14  | 0,710301143 | -0,03 | 0,977236465 |
| Gm29907 | 0,59  | 0,468471001 | -0,19 | 0,702757763 | 0,01  | 0,996265665 | 0,21  | 0,805169421 | -0,34 | 0,763240477 |
| Gm2a    | 0,16  | 0,832696131 | 0,07  | 0,949792535 | 0,46  | 0,702677589 | -1,18 | 0,036726581 | -0,63 | 0,229389194 |
| Gm3002  | 0,4   | 0,554603293 | 0,92  | 0,467853942 | -1,03 | 0,161469949 | 0,57  | 0,474175236 | 0,38  | 0,551380136 |
| Gm30082 | 0,47  | 0,453318919 | 0,14  | 0,898701949 | -0,14 | 0,8685347   | -0,43 | 0,711972052 | 0,17  | 0,859663155 |
| Gm30132 | 0,38  | 0,597082878 | 0,56  | 0,446520478 | -0,19 | 0,880153436 | -0,3  | 0,566956906 | -0,29 | 0,735796038 |
| Gm30168 | 0,15  | 0,704646948 | 0     | 1           | -0,24 | 0,694941328 | -0,06 | 0,902706786 | 0,27  | 0,669861917 |
| Gm3045  | 0,11  | 0,859044359 | -0,38 | 0,568815469 | -0,18 | 0,76370647  | 0,33  | 0,433788991 | -0,04 | 0,958259949 |

|         |       |             |       |             |       |             |       |             |       |             |
|---------|-------|-------------|-------|-------------|-------|-------------|-------|-------------|-------|-------------|
| Gm30571 | 0,07  | 0,886741208 | -0,09 | 0,867265251 | -0,27 | 0,539159914 | 0,01  | 0,979039536 | 0,22  | 0,778507273 |
| Gm30613 | 0,25  | 0,656726345 | 0,05  | 0,928134372 | -0,19 | 0,842919139 | -0,12 | 0,779547737 | -0,08 | 0,916674771 |
| Gm3086  | -0,33 | 0,651205657 | -0,62 | 0,242002134 | -0,18 | 0,800107725 | 0,67  | 0,090453512 | -0,13 | 0,887969996 |
| Gm3099  | 1,06  | 0,086053972 | 0,11  | 0,954324398 | 0,38  | 0,563934293 | 0,48  | 0,528687578 | 0,37  | 0,598277181 |
| Gm3106  | 0,03  | 0,955321816 | 0,02  | 0,976594855 | 0,08  | 0,905967183 | -0,06 | 0,931250259 | -0,02 | 0,984125319 |
| Gm3134  | 0,07  | 0,892092463 | -0,03 | 0,955623088 | -0,09 | 0,878717363 | 0     | 0,996200843 | -0,07 | 0,92650684  |
| Gm3143  | 0,06  | 0,921564669 | 0,18  | 0,873446866 | -0,2  | 0,736837174 | 0,18  | 0,798674602 | -0,13 | 0,875520848 |
| Gm3149  | 0,32  | 0,692923111 | 0,77  | 0,261025347 | -0,4  | 0,766359141 | 0,79  | 0,377566976 | 0,07  | 0,933759514 |
| Gm3173  | 1,28  | 0,106666298 | 1,16  | 0,262154583 | -1,43 | 0,093530523 | 0,17  | 0,936482652 | -0,21 | 0,934344891 |
| Gm31854 | -0,29 | 0,567790521 | 0,32  | 0,658998976 | 0,23  | 0,77115153  | -0,01 | 0,984891368 | -0,06 | 0,947437555 |
| Gm3213  | 0,34  | 0,613128598 | -0,22 | 0,825210924 | -0,31 | 0,612977553 | 0     | 1           | 0,43  | 0,456564217 |
| Gm3219  | -0,39 | 0,369418071 | -0,21 | 0,766425161 | 0,05  | 0,974887915 | 0,64  | 0,162858683 | -0,02 | 0,979392852 |
| Gm3227  | -0,04 | 0,958126198 | -0,07 | 0,886286684 | 0,1   | 0,891539719 | 0,1   | 0,780509374 | -0,05 | 0,95587699  |
| Gm3230  | 0,13  | 0,867692799 | 0,03  | 0,95429671  | -0,12 | 0,850171327 | -0,7  | 0,142927478 | -0,55 | 0,496943075 |
| Gm3238  | 0,39  | 0,362668226 | 0,1   | 0,89081665  | -0,05 | 0,946627221 | 0,05  | 0,906675262 | -0,24 | 0,763240477 |
| Gm3250  | -0,01 | 0,992758399 | -0,03 | 0,975959817 | 0,08  | 0,920268328 | -0,07 | 0,920563784 | 0,07  | 0,954565959 |
| Gm3255  | -0,15 | 0,930509569 | -0,23 | 0,857388191 | 0,68  | 0,539756271 | -1,07 | 0,061553989 | -0,41 | 0,631479776 |
| Gm3259  | 0,59  | 0,601533006 | -0,21 | 0,671319666 | 0,22  | 0,770526999 | -0,19 | 0,851404599 | 0,07  | 0,952753183 |
| Gm3264  | 1,11  | 0,500832169 | 1,7   | 0,532598025 | -1,87 | 0,119786786 | 1,41  | 0,329098653 | -1,01 | 0,363127424 |
| Gm3279  | 0,03  | 0,976497987 | -0,45 | 0,834836889 | -0,16 | 0,792556971 | 0,76  | 0,308123565 | 0,59  | 0,564594869 |
| Gm3285  | 0,41  | 0,318041432 | 0,2   | 0,687328663 | -0,28 | 0,660610212 | -0,14 | 0,715071575 | 0,21  | 0,700875396 |
| Gm3286  | 0,11  | 0,899338914 | 0,24  | 0,809683705 | -0,05 | 0,968694156 | -0,14 | 0,814822926 | -0,34 | 0,514003486 |
| Gm3287  | 0,21  | 0,728539265 | 0,2   | 0,823246376 | 0,44  | 0,454498768 | -0,31 | 0,471387138 | 0,16  | 0,845218636 |
| Gm33328 | 0,33  | 0,652859432 | 0,01  | 0,989825179 | -0,49 | 0,464639399 | 0,15  | 0,722475594 | 0,01  | 0,991437885 |
| Gm3336  | 0,03  | 0,972180409 | 0,64  | 0,295775341 | 0,04  | 0,978207511 | -0,96 | 0,270546358 | -0,35 | 0,830788023 |
| Gm33589 | -0,07 | 0,877910054 | 0,01  | 0,994137877 | 0,07  | 0,914320423 | 0,14  | 0,694003583 | 0,1   | 0,876666201 |
| Gm33602 | 0,08  | 0,924139727 | 0,48  | 0,446315327 | -0,17 | 0,887630371 | 0,1   | 0,919668684 | 0,53  | 0,458321906 |
| Gm3363  | -0,06 | 0,931118769 | 0,11  | 0,876403921 | -0,73 | 0,124647743 | -0,35 | 0,548740401 | 0,79  | 0,13414573  |
| Gm3364  | 0,04  | 0,965468545 | 0,03  | 0,958545812 | 0,05  | 0,953975807 | -0,12 | 0,845399935 | 0,68  | 0,291178873 |
| Gm33676 | 0,12  | 0,856984761 | -0,1  | 0,862384834 | 0,49  | 0,329361684 | 0,63  | 0,142944673 | 0,06  | 0,971058066 |
| Gm3383  | 0,59  | 0,392252384 | 0,67  | 0,138101221 | -0,5  | 0,313065218 | 0,62  | 0,124923887 | -0,32 | 0,763277172 |
| Gm340   | 0,17  | 0,777335496 | 0,14  | 0,804868131 | 0,94  | 0,447636137 | 0,81  | 0,195221568 | -0,48 | 0,579591044 |
| Gm3404  | 0,48  | 0,485067976 | -0,28 | 0,586955568 | 0,16  | 0,870377336 | -0,39 | 0,530193027 | -0,24 | 0,884248437 |
| Gm34055 | 0,12  | 0,808857381 | -0,05 | 0,958856577 | -0,07 | 0,926566777 | -0,02 | 0,96939036  | -0,1  | 0,878456345 |
| Gm3414  | 0,19  | 0,762798673 | 0,49  | 0,335724646 | 0,12  | 0,864411302 | -0,08 | 0,946205705 | 0,18  | 0,866848972 |



|         |       |             |       |             |       |             |       |             |       |             |
|---------|-------|-------------|-------|-------------|-------|-------------|-------|-------------|-------|-------------|
| Gm3428  | -0,01 | 0,995778597 | -0,21 | 0,664787536 | -0,33 | 0,545894079 | -0,22 | 0,575297022 | -0,05 | 0,948356387 |
| Gm34305 | -0,33 | 0,631063936 | 0,13  | 0,882248865 | 0,01  | 0,997145286 | -0,6  | 0,418568872 | -0,21 | 0,884640084 |
| Gm3434  | -0,03 | 0,965482773 | 0,36  | 0,574121139 | 0,16  | 0,790984195 | -0,39 | 0,555470395 | -0,49 | 0,462558109 |
| Gm3435  | 0,02  | 0,989374982 | 0,47  | 0,739345787 | -0,22 | 0,846458227 | -0,49 | 0,820745707 | 0,21  | 0,940438527 |
| Gm3453  | 1,64  | 0,112173822 | 1,61  | 0,18729601  | -3,56 | 0,00047846  | 0,11  | 0,949669541 | 0,68  | 0,587915673 |
| Gm34921 | 0,06  | 0,942119638 | 0,11  | 0,812459283 | -0,55 | 0,591404136 | -0,21 | 0,583650562 | 0,23  | 0,678938588 |
| Gm3500  | 1,68  | 0,116800904 | 0,72  | 0,489766492 | -1,39 | 0,441848171 | 4,35  | 0,018624038 | 1,98  | 0,106654559 |
| Gm35032 | -0,68 | 0,186493119 | 0,27  | 0,55571605  | -0,36 | 0,37970041  | 1,39  | 0,014448104 | 0     | 0,998332822 |
| Gm35034 | 0,08  | 0,856118781 | -0,12 | 0,841007084 | -0,13 | 0,841563482 | 0,4   | 0,230415121 | 0,13  | 0,881943508 |
| Gm3510  | 0,22  | 0,59710379  | -0,1  | 0,829923566 | -0,28 | 0,576939208 | -0,05 | 0,906170796 | -0,36 | 0,450543672 |
| Gm3558  | 1,74  | 0,020486771 | 1,47  | 0,131076642 | -1,98 | 0,038316852 | 1,9   | 0,056433439 | 0     | 0,99981982  |
| Gm3604  | -0,13 | 0,834744248 | -0,34 | 0,535229346 | -0,26 | 0,560191012 | -0,35 | 0,730951567 | 0,02  | 0,988781535 |
| Gm36091 | -0,35 | 0,493149055 | 0,73  | 0,487477927 | -0,59 | 0,446189252 | 0,51  | 0,318097982 | 0,01  | 0,990091016 |
| Gm362   | 0     | 0,996998625 | -0,02 | 0,986782918 | -0,02 | 0,985326269 | 0,01  | 0,983166423 | 0,01  | 0,985190055 |
| Gm3625  | 0,28  | 0,642618049 | 0,15  | 0,755498335 | -0,78 | 0,180205458 | -0,01 | 0,982534991 | -0,12 | 0,867554277 |
| Gm36385 | 0,24  | 0,597519827 | -0,05 | 0,935984823 | -0,2  | 0,724675525 | 0,05  | 0,91157983  | 0,04  | 0,953681513 |
| Gm364   | -0,42 | 0,277154156 | 0,16  | 0,781665479 | -0,21 | 0,786838878 | -0,27 | 0,679886975 | 0,06  | 0,957130917 |
| Gm3646  | 0,09  | 0,888962766 | -0,12 | 0,882589938 | 0,03  | 0,967930981 | 0,12  | 0,75629951  | 0,09  | 0,891991231 |
| Gm36800 | -0,03 | 0,968370059 | 0,2   | 0,777794298 | 0,29  | 0,702677589 | -0,4  | 0,45012064  | -0,15 | 0,873506336 |
| Gm3693  | -0,01 | 0,986327817 | -0,06 | 0,898952381 | -0,23 | 0,641764537 | 0,06  | 0,887001654 | -0,03 | 0,970287867 |
| Gm3696  | 1,23  | 0,074890017 | 0,97  | 0,087315688 | -1,73 | 0,034997504 | 1,49  | 0,141794466 | 0,25  | 0,858314976 |
| Gm3716  | 0,27  | 0,596550801 | -0,01 | 0,993777297 | 0,09  | 0,892881818 | -0,81 | 0,46339669  | 0,22  | 0,901341817 |
| Gm3740  | 0,36  | 0,761425175 | 0,42  | 0,671319666 | -0,28 | 0,640924712 | -0,8  | 0,352630383 | -0,1  | 0,947437555 |
| Gm3763  | -0,07 | 0,897481914 | 0,09  | 0,894205636 | -0,34 | 0,500343254 | 0,09  | 0,837946196 | 0,23  | 0,683144041 |
| Gm3764  | 0,31  | 0,687662951 | 0,37  | 0,531993971 | 0,08  | 0,938771378 | -0,36 | 0,458861862 | 0,18  | 0,817930191 |
| Gm382   | -0,17 | 0,697463573 | -0,12 | 0,852719676 | -0,04 | 0,967304745 | -0,2  | 0,655876131 | -0,02 | 0,983613958 |
| Gm3831  | 0,13  | 0,764288636 | 0,15  | 0,805949528 | -0,23 | 0,641142024 | -0,26 | 0,507570518 | 0,22  | 0,731865047 |
| Gm38388 | -0,05 | 0,947630317 | 0,49  | 0,370515616 | -0,03 | 0,97730677  | -0,09 | 0,820875536 | -0,18 | 0,765419939 |
| Gm38396 | 0,1   | 0,944652244 | -0,07 | 0,984000632 | -0,76 | 0,490489841 | -1,63 | 0,187709521 | 0,15  | 0,891925115 |
| Gm38402 | 0,09  | 0,914090929 | 0,15  | 0,779987883 | -0,03 | 0,970969012 | -0,29 | 0,524018746 | -0,08 | 0,93928847  |
| Gm38422 | -0,37 | 0,721797378 | -0,31 | 0,726534004 | 0,66  | 0,513307287 | 0,22  | 0,611632616 | 0,05  | 0,951223734 |
| Gm38424 | -0,02 | 0,973255755 | 0,31  | 0,589944528 | -0,12 | 0,90672161  | -0,92 | 0,135202113 | -0,33 | 0,743091876 |
| Gm38425 | -0,13 | 0,820023436 | 0,39  | 0,458898493 | -0,14 | 0,825835155 | -0,4  | 0,231818607 | -0,15 | 0,8163889   |
| Gm38426 | 0,08  | 0,892124736 | -0,23 | 0,748879278 | -0,24 | 0,821229302 | 0,23  | 0,824359322 | 0     | 0,999572304 |
| Gm38427 | -0,06 | 0,967892992 | -0,45 | 0,654403887 | -0,08 | 0,953292736 | 0,59  | 0,575304908 | 0,14  | 0,912250982 |

|         |       |             |       |             |       |             |       |             |       |             |
|---------|-------|-------------|-------|-------------|-------|-------------|-------|-------------|-------|-------------|
| Gm38444 | 0,59  | 0,673291416 | -0,23 | 0,748701216 | 0,15  | 0,905393221 | 0,63  | 0,073909416 | 0,09  | 0,917844354 |
| Gm38453 | -0,57 | 0,472739337 | -0,08 | 0,906234611 | 0,19  | 0,828424248 | 0,28  | 0,743102918 | 0,2   | 0,831449955 |
| Gm38455 | -0,35 | 0,491134601 | -0,01 | 0,995205602 | 0,16  | 0,790538695 | -0,32 | 0,429089873 | -0,18 | 0,807725933 |
| Gm38475 | -0,06 | 0,924139727 | 0,27  | 0,67187703  | -0,3  | 0,601444701 | -0,17 | 0,620148518 | -0,04 | 0,97206128  |
| Gm38483 | 0,09  | 0,921581444 | 0,35  | 0,628604582 | 0,01  | 0,993379272 | -0,13 | 0,768817161 | 0,05  | 0,953297732 |
| Gm38490 | 0,13  | 0,79498488  | 0,03  | 0,964639041 | 0,39  | 0,392729956 | 0,07  | 0,9274274   | -0,03 | 0,974225592 |
| Gm38497 | 0,01  | 0,995075117 | -0,02 | 0,99605452  | 0,12  | 0,915447788 | -0,31 | 0,454948356 | -0,81 | 0,098490291 |
| Gm38500 | -0,27 | 0,883130741 | 0     | 0,998818332 | -0,47 | 0,69297088  | 0,09  | 0,943143586 | 0,33  | 0,808760113 |
| Gm38505 | 0,1   | 0,842618646 | 0,03  | 0,969010894 | 0,05  | 0,948637233 | -0,09 | 0,858484804 | 0,07  | 0,94919447  |
| Gm38509 | 0,08  | 0,867025523 | 0,08  | 0,858860016 | -0,23 | 0,628048897 | -0,03 | 0,952133471 | 0,03  | 0,968017997 |
| Gm38511 | -0,91 | 0,38078928  | -0,84 | 0,40056536  | 0,53  | 0,571082984 | 0,32  | 0,635466682 | -0,2  | 0,88282824  |
| Gm38585 | 0,06  | 0,91409989  | -0,06 | 0,89034555  | 0,03  | 0,968742139 | 0,36  | 0,490353906 | 0     | 0,998704075 |
| Gm38691 | 0,06  | 0,957427783 | 0,15  | 0,891749049 | -0,73 | 0,171186748 | -0,13 | 0,835214439 | 0,23  | 0,77360786  |
| Gm38715 | 0,23  | 0,784951771 | 0,09  | 0,861828582 | 0,3   | 0,725496743 | 0,1   | 0,819747319 | -0,01 | 0,992607235 |
| Gm3878  | -0,03 | 0,971660923 | 0     | 1           | 0     | 0,997268369 | -0,09 | 0,863092288 | -0,14 | 0,840036408 |
| Gm3902  | 0,09  | 0,887055951 | 0,08  | 0,892737638 | 0,24  | 0,824083851 | 0,04  | 0,963725303 | 0,24  | 0,845218636 |
| Gm3948  | 0,12  | 0,775296013 | 0,02  | 0,986535927 | 0,02  | 0,982984296 | 0,02  | 0,971151107 | 0,11  | 0,871015717 |
| Gm3985  | 0,27  | 0,613990129 | 0,13  | 0,756514853 | -0,13 | 0,809137779 | 0,04  | 0,938387989 | 0,03  | 0,971543996 |
| Gm41    | -0,13 | 0,750362144 | 0,08  | 0,855321685 | 0,22  | 0,664883291 | 0     | 0,995454239 | 0,13  | 0,860919132 |
| Gm4117  | 0,1   | 0,917337233 | 0,2   | 0,593777931 | 0,15  | 0,864691151 | -0,26 | 0,564749161 | 0,08  | 0,920748161 |
| Gm4166  | 0,48  | 0,277692472 | 0,54  | 0,509013394 | -0,11 | 0,919116989 | -0,65 | 0,27199617  | 0,34  | 0,671145344 |
| Gm42006 | 0,29  | 0,709143821 | -0,11 | 0,857950143 | -0,74 | 0,406359307 | 0,3   | 0,635378562 | 0,14  | 0,910212022 |
| Gm4211  | 0,2   | 0,610509826 | -0,08 | 0,932144238 | 0,2   | 0,717745831 | 0,32  | 0,550957518 | 0,02  | 0,978981442 |
| Gm4221  | 0,49  | 0,585597429 | -0,88 | 0,716437544 | -0,11 | 0,941627748 | 0,82  | 0,464815834 | -0,28 | 0,832848337 |
| Gm4224  | 0,16  | 0,841140165 | -0,72 | 0,586775333 | -0,05 | 0,965105008 | 0,07  | 0,923472337 | -0,03 | 0,979456872 |
| Gm4251  | 0,09  | 0,897717279 | -0,42 | 0,336684294 | 0,01  | 0,989772079 | -0,02 | 0,982401165 | 0,18  | 0,797293554 |
| Gm4262  | -0,06 | 0,916211561 | 0,45  | 0,503323618 | -0,09 | 0,894866237 | -0,48 | 0,336538437 | -0,17 | 0,834852744 |
| Gm4265  | -0,13 | 0,769716601 | -0,04 | 0,956049982 | -0,21 | 0,777568498 | -0,1  | 0,80795564  | 0,07  | 0,92741476  |
| Gm4278  | 0,19  | 0,716985606 | -0,08 | 0,869495185 | -0,09 | 0,875089034 | 0,06  | 0,919386017 | 0,29  | 0,623304657 |
| Gm4279  | -0,02 | 0,983473307 | 0,03  | 0,950083409 | 0,08  | 0,914134206 | 0,01  | 0,98149042  | -0,03 | 0,982175252 |
| Gm428   | -0,2  | 0,790694396 | 0     | 1           | 0,15  | 0,852219946 | 0,52  | 0,420008152 | 0,66  | 0,34276619  |
| Gm4285  | -0,13 | 0,789064954 | 0,47  | 0,519220121 | -0,63 | 0,709814408 | -0,73 | 0,219117195 | -0,28 | 0,6425144   |
| Gm4349  | -0,07 | 0,937910857 | 0,05  | 0,967833514 | 0,06  | 0,94110925  | 0,24  | 0,739831108 | 0,25  | 0,763240477 |
| Gm436   | 0,29  | 0,685826767 | -0,35 | 0,620803951 | 0,55  | 0,37970041  | 0,22  | 0,665933714 | 0,18  | 0,830348658 |
| Gm4371  | 0,29  | 0,397054492 | 0,4   | 0,418418761 | 0,02  | 0,976660743 | 0     | 1           | -0,1  | 0,884047752 |

|         |       |             |       |             |       |             |       |             |       |             |
|---------|-------|-------------|-------|-------------|-------|-------------|-------|-------------|-------|-------------|
| Gm438   | 0,19  | 0,810101389 | 0,33  | 0,501438027 | -0,05 | 0,953456022 | -0,78 | 0,058564376 | -0,27 | 0,823098095 |
| Gm44    | -0,04 | 0,950532575 | -0,06 | 0,901352701 | -0,12 | 0,841464759 | 0,21  | 0,595587009 | 0,29  | 0,656299574 |
| Gm4419  | 0,03  | 0,984967814 | 1,06  | 0,250869803 | -0,21 | 0,833373493 | -0,44 | 0,589045643 | -0,08 | 0,968130547 |
| Gm44501 | 0,08  | 0,889132203 | 0,28  | 0,612941322 | -0,19 | 0,809137779 | -0,17 | 0,722475594 | 0,11  | 0,890833196 |
| Gm44504 | -0,17 | 0,849867944 | 0,19  | 0,77148563  | -0,12 | 0,906709737 | -0,23 | 0,592457782 | -0,37 | 0,489067601 |
| Gm4461  | 0,02  | 0,965482773 | -0,08 | 0,861905894 | -0,25 | 0,685155077 | 0,14  | 0,742706747 | -0,02 | 0,982175252 |
| Gm4473  | 0,17  | 0,692490424 | 0,18  | 0,762657778 | 0,05  | 0,947881687 | 0,06  | 0,887977289 | 0,04  | 0,962442464 |
| Gm4489  | 0,1   | 0,925148331 | -0,23 | 0,732847182 | -0,13 | 0,89223455  | 0,45  | 0,270944775 | 0,06  | 0,948163009 |
| Gm4491  | 0,04  | 0,963914207 | -0,28 | 0,638366221 | 0,13  | 0,885042765 | 0,08  | 0,924578858 | -0,09 | 0,906338603 |
| Gm4524  | 0,08  | 0,878571032 | -0,03 | 0,957957101 | 0,14  | 0,807926482 | -0,02 | 0,963392781 | -0,33 | 0,616279346 |
| Gm4532  | -0,1  | 0,892823025 | -0,06 | 0,898238238 | 0,25  | 0,698662367 | 0,23  | 0,567701066 | -0,13 | 0,847755273 |
| Gm454   | -0,02 | 0,982383659 | 0,07  | 0,952172893 | -0,03 | 0,968874924 | 0,17  | 0,696843539 | -0,33 | 0,692895938 |
| Gm4541  | 0,23  | 0,630710347 | 0,06  | 0,912516873 | -0,13 | 0,889818596 | 0,39  | 0,204322243 | -0,04 | 0,96206141  |
| Gm4544  | 0,05  | 0,935644409 | -0,18 | 0,671319666 | 0,05  | 0,952019801 | 0,07  | 0,878417314 | 0,25  | 0,673145862 |
| Gm4553  | -0,01 | 0,996998625 | -0,03 | 0,992175086 | -0,28 | 0,576505498 | -0,04 | 0,950850446 | -0,23 | 0,78960943  |
| Gm4559  | 0,03  | 0,954174818 | -0,07 | 0,892869412 | 0,2   | 0,7674045   | 0,23  | 0,601688484 | 0,07  | 0,947901649 |
| Gm4566  | 0,24  | 0,797534003 | -0,11 | 0,803283255 | 0,34  | 0,544756897 | 0,04  | 0,963752888 | -0,31 | 0,738844505 |
| Gm4567  | 0,35  | 0,622436248 | 0,09  | 0,976868317 | -1,02 | 0,161469949 | 0,15  | 0,920036779 | 0,93  | 0,353136904 |
| Gm4583  | -0,06 | 0,9124306   | 0,19  | 0,654621987 | -0,19 | 0,702352448 | 0,24  | 0,508718568 | 0,37  | 0,566248044 |
| Gm4598  | -0,09 | 0,831529237 | 0,11  | 0,843249772 | -0,17 | 0,757498725 | 0,03  | 0,948855292 | 0     | 0,994270272 |
| Gm4610  | -0,41 | 0,660482793 | 0,04  | 0,959209847 | 0,01  | 0,9954711   | 0,22  | 0,642766157 | 0,03  | 0,980961333 |
| Gm4651  | 0,12  | 0,785669218 | -0,05 | 0,926353869 | -0,43 | 0,371992214 | 0,12  | 0,845617958 | 0,43  | 0,598276466 |
| Gm4657  | 0,24  | 0,646090784 | 0,15  | 0,781665479 | 0,02  | 0,984961095 | -0,29 | 0,419928649 | 0,03  | 0,978604922 |
| Gm4673  | -0,12 | 0,80226019  | 0     | 0,999210601 | -0,02 | 0,978255748 | -0,19 | 0,656831799 | 0,02  | 0,979456872 |
| Gm4710  | -0,36 | 0,664036618 | -0,04 | 0,985151214 | -0,32 | 0,659555232 | 0,33  | 0,453775013 | 0,05  | 0,957620856 |
| Gm4719  | -0,08 | 0,875555348 | -0,06 | 0,921623438 | 0,09  | 0,867571963 | 0,19  | 0,671346789 | 0,09  | 0,940438527 |
| Gm4724  | -0,44 | 0,519823113 | -0,38 | 0,867265251 | -0,1  | 0,977081417 | -0,13 | 0,93866369  | -0,09 | 0,968130547 |
| Gm4755  | -0,27 | 0,567790521 | 0,05  | 0,944349738 | -0,2  | 0,821984166 | -0,32 | 0,5859782   | -0,44 | 0,583535515 |
| Gm4758  | 0,25  | 0,719765184 | 0,3   | 0,594966868 | -0,46 | 0,573350883 | -0,06 | 0,924778169 | -0,2  | 0,811615054 |
| Gm4759  | 1,35  | 0,156158686 | 1,49  | 0,219055424 | -1,31 | 0,069580567 | -4,04 | 0,008746145 | 1,5   | 0,051934262 |
| Gm4763  | 0,03  | 0,963914207 | -0,05 | 0,945920068 | 0,46  | 0,316019354 | -0,13 | 0,919183375 | -0,01 | 0,993785683 |
| Gm4787  | -0,41 | 0,474777426 | -0,18 | 0,813044153 | 0,35  | 0,680365848 | -0,09 | 0,921817677 | 0,26  | 0,826379382 |
| Gm4788  | 0,81  | 0,620468351 | -0,15 | 0,884239192 | -0,17 | 0,968677508 | 0     | 1           | -0,25 | 0,778000995 |
| Gm4791  | 0,06  | 0,925510521 | -0,08 | 0,870011115 | -0,12 | 0,839250602 | -0,04 | 0,927705788 | 0,02  | 0,977599806 |
| Gm4792  | -0,15 | 0,782889069 | 0,21  | 0,84526289  | -0,07 | 0,932577939 | -0,19 | 0,749218641 | -0,22 | 0,675282484 |

|        |       |             |       |             |       |             |       |             |       |             |
|--------|-------|-------------|-------|-------------|-------|-------------|-------|-------------|-------|-------------|
| Gm4793 | 0,22  | 0,832696131 | 0,16  | 0,853094985 | -0,1  | 0,901816517 | -0,42 | 0,240538051 | 0,04  | 0,977945762 |
| Gm4794 | 0,07  | 0,921306075 | -0,11 | 0,848714168 | -0,08 | 0,904132011 | -0,31 | 0,48505774  | -0,12 | 0,900126162 |
| Gm4802 | 0,01  | 0,982552406 | -0,04 | 0,956776447 | -0,18 | 0,732540375 | 0,16  | 0,789717483 | -0,02 | 0,983768072 |
| Gm4814 | -0,07 | 0,907748757 | -0,06 | 0,903595287 | 0,02  | 0,986406216 | 0,05  | 0,901395825 | 0,04  | 0,956585095 |
| Gm4827 | -0,21 | 0,781976975 | -0,32 | 0,467362999 | -0,35 | 0,757498725 | 0,44  | 0,24812886  | -0,23 | 0,740756532 |
| Gm4832 | -0,09 | 0,876138432 | 0,2   | 0,651272719 | -0,12 | 0,903366838 | 0,25  | 0,534171194 | 0,11  | 0,873651528 |
| Gm4841 | 3,01  | 0,024768323 | 2,78  | 0,077698935 | -3,08 | 0,078450603 | -0,17 | 0,829589733 | 3,3   | 0,001111111 |
| Gm4846 | 0,08  | 0,960597621 | 0,13  | 0,886860823 | 0,08  | 0,937520804 | -0,19 | 0,779093746 | -0,23 | 0,765565207 |
| Gm4847 | 0,39  | 0,479242832 | 0,24  | 0,720902851 | -0,43 | 0,562334029 | 0,34  | 0,579766089 | 0,42  | 0,393448838 |
| Gm4850 | 0,16  | 0,716985606 | 0,06  | 0,906777728 | -0,23 | 0,637962156 | 0,09  | 0,854525597 | 0,31  | 0,578185552 |
| Gm4858 | 0,46  | 0,472544689 | -0,88 | 0,441593532 | -0,48 | 0,701501564 | 0,85  | 0,247959371 | 0,31  | 0,741766428 |
| Gm4861 | 0,25  | 0,689253784 | 0,38  | 0,509205003 | -0,15 | 0,823823322 | -0,35 | 0,674962531 | -0,62 | 0,211018037 |
| Gm4868 | 0,13  | 0,774822327 | -0,03 | 0,965413567 | 0,08  | 0,911634383 | -0,01 | 0,994279933 | -0,43 | 0,475893781 |
| Gm4871 | 0,29  | 0,597954095 | -0,04 | 0,983210629 | -0,86 | 0,36121902  | 0,03  | 0,967866794 | -0,12 | 0,926308401 |
| Gm4876 | 0,33  | 0,594945461 | 0,56  | 0,62733885  | 0,25  | 0,683917899 | -0,44 | 0,192516739 | -0,24 | 0,763240477 |
| Gm4881 | 0,55  | 0,24489967  | -0,3  | 0,675895231 | -0,52 | 0,663029337 | -0,37 | 0,686514009 | -0,44 | 0,734230208 |
| Gm4884 | 0,07  | 0,923180948 | -0,6  | 0,286908359 | -0,18 | 0,747133397 | 0,24  | 0,751826661 | -0,22 | 0,830142247 |
| Gm4889 | -0,06 | 0,94727537  | 0,02  | 0,993011462 | -0,03 | 0,978012085 | 0,06  | 0,901395825 | 0,28  | 0,604599251 |
| Gm4890 | -0,29 | 0,671077469 | 0,08  | 0,894442009 | 0,27  | 0,777918093 | 0,25  | 0,601996277 | -0,45 | 0,637495386 |
| Gm4894 | 0,02  | 0,98225675  | 0,04  | 0,965090893 | -0,21 | 0,688311192 | 0,32  | 0,473585427 | 0,34  | 0,674843991 |
| Gm4906 | 0,11  | 0,822107047 | -0,01 | 0,999210601 | -0,16 | 0,805783058 | -0,07 | 0,915527497 | -0,37 | 0,439284732 |
| Gm4916 | 0,13  | 0,74140155  | 0,06  | 0,893262563 | -0,19 | 0,702426764 | 0,03  | 0,944600114 | -0,02 | 0,983877321 |
| Gm4922 | -0,05 | 0,94815841  | -0,05 | 0,934294134 | -0,28 | 0,723002297 | 0,21  | 0,738303576 | 0,15  | 0,861763071 |
| Gm4924 | 0,52  | 0,820785667 | -0,22 | 0,683621858 | -0,98 | 0,305273726 | 0,02  | 0,993629132 | -0,27 | 0,92519473  |
| Gm4925 | -0,11 | 0,808882471 | 0,3   | 0,589733014 | 0     | 0,997220401 | -0,02 | 0,9704566   | 0,11  | 0,89529118  |
| Gm4926 | -0,01 | 0,98782208  | 0,16  | 0,715688609 | 0,15  | 0,865145801 | 0,11  | 0,798957117 | 0,13  | 0,864166878 |
| Gm4944 | -0,2  | 0,721797378 | 0,67  | 0,557225381 | -0,38 | 0,74860644  | -0,4  | 0,742706747 | 0,37  | 0,763240477 |
| Gm4951 | 1,96  | 0,205017653 | 1,69  | 0,164810885 | -2,84 | 0,006046361 | -1,04 | 0,209577674 | 1,95  | 0,020323407 |
| Gm4952 | 0,25  | 0,836344315 | -0,45 | 0,808772481 | 0,11  | 0,87140695  | 0,58  | 0,576048365 | 0,53  | 0,574285481 |
| Gm4956 | 0,04  | 0,969746898 | 0,02  | 0,986782918 | -0,22 | 0,777417583 | 0,12  | 0,810891431 | 0,3   | 0,654175735 |
| Gm4961 | -0,09 | 0,895400682 | -0,04 | 0,987777411 | 0,18  | 0,775963444 | 0,74  | 0,266016367 | -0,17 | 0,806478588 |
| Gm4969 | -0,22 | 0,790694396 | -0,13 | 0,785543886 | 0,02  | 0,979791644 | 0,26  | 0,742352468 | 0,01  | 0,98653183  |
| Gm4971 | 0,42  | 0,270539782 | 0,14  | 0,809963911 | -0,55 | 0,26478657  | -0,05 | 0,928002892 | -0,06 | 0,952753183 |
| Gm4981 | -0,02 | 0,98456417  | -0,1  | 0,937424389 | -0,06 | 0,946810097 | 0,42  | 0,292947126 | 0,32  | 0,666438118 |
| Gm4983 | 0,06  | 0,969841821 | 0,1   | 0,88340343  | -0,22 | 0,675428772 | -0,11 | 0,896599656 | -0,52 | 0,471406593 |

|        |       |             |       |             |       |             |       |             |       |             |
|--------|-------|-------------|-------|-------------|-------|-------------|-------|-------------|-------|-------------|
| Gm4984 | 0,07  | 0,904662114 | -0,06 | 0,905329291 | -0,02 | 0,978554254 | -0,13 | 0,831333558 | 0,06  | 0,960065122 |
| Gm4988 | 0,19  | 0,761119803 | 0,01  | 0,994137877 | -0,24 | 0,779970041 | 0,25  | 0,551563657 | 0,06  | 0,955910202 |
| Gm4994 | 0,06  | 0,929634271 | 0,08  | 0,944131807 | -0,32 | 0,607318275 | 0,13  | 0,829087694 | -0,1  | 0,919028444 |
| Gm4997 | 0,17  | 0,675149694 | 0,06  | 0,907186434 | -0,1  | 0,859689055 | 0,17  | 0,665832473 | 0,1   | 0,875421436 |
| Gm5    | -0,09 | 0,847070804 | 0,17  | 0,826165513 | -0,08 | 0,934126964 | -0,24 | 0,688152796 | -0,57 | 0,241394095 |
| Gm5039 | 0,41  | 0,417482906 | -0,3  | 0,703559577 | -0,29 | 0,514725214 | 0,04  | 0,943143586 | -0,22 | 0,753273319 |
| Gm5065 | -0,01 | 0,997487069 | -0,67 | 0,487771533 | -0,2  | 0,803209705 | 0,48  | 0,405136104 | 0,16  | 0,789294096 |
| Gm5069 | -0,69 | 0,264937591 | -0,96 | 0,572250784 | -0,15 | 0,884854874 | 0,11  | 0,938387989 | 0     | 0,99981982  |
| Gm5071 | 0,17  | 0,707502054 | -0,12 | 0,793603525 | 0,02  | 0,982648972 | -0,01 | 0,988205241 | -0,02 | 0,976743304 |
| Gm5082 | -0,21 | 0,701624105 | 0     | 1           | -0,28 | 0,695306228 | 0,14  | 0,825299388 | -0,14 | 0,881135847 |
| Gm5083 | -0,28 | 0,742089645 | 0,5   | 0,643955364 | 0     | 0,997220401 | -0,05 | 0,893841279 | -0,2  | 0,802618378 |
| Gm5084 | 0,14  | 0,81630789  | -0,26 | 0,647350333 | -0,08 | 0,92422034  | -0,03 | 0,961123444 | 0,33  | 0,487064794 |
| Gm5086 | -0,35 | 0,497466519 | 0,06  | 0,915587986 | -0,01 | 0,991378753 | -0,17 | 0,744192947 | -0,3  | 0,578525022 |
| Gm5087 | 0,23  | 0,554473314 | 0,28  | 0,756555599 | 0,02  | 0,982648972 | -0,16 | 0,83280418  | -0,03 | 0,97884055  |
| Gm5088 | 0,05  | 0,923035054 | 0,09  | 0,855648379 | 0,21  | 0,714718369 | 0,17  | 0,617560575 | 0,25  | 0,629683647 |
| Gm5089 | -0,05 | 0,96177183  | 0,05  | 0,943782735 | -0,06 | 0,955257293 | 0,1   | 0,896599656 | -0,04 | 0,963153168 |
| Gm5091 | 0,17  | 0,723801759 | -0,35 | 0,538642201 | -0,04 | 0,967767582 | -0,21 | 0,805452009 | 0,07  | 0,953297732 |
| Gm5092 | 0,44  | 0,314547808 | -0,32 | 0,828034932 | -0,36 | 0,644036028 | -0,44 | 0,709041919 | -0,46 | 0,746431548 |
| Gm5093 | 0,24  | 0,658898834 | -0,05 | 0,958376623 | 0,25  | 0,849342965 | 1,03  | 0,110589375 | 0,45  | 0,572917283 |
| Gm5094 | 0,45  | 0,471984585 | -0,25 | 0,695823136 | -0,49 | 0,339295013 | -0,04 | 0,943853818 | -0,03 | 0,983300881 |
| Gm5095 | 0,27  | 0,60271369  | 0,04  | 0,963369162 | 0,05  | 0,952104131 | -0,13 | 0,787921349 | -0,27 | 0,761121493 |
| Gm5099 | 0,11  | 0,893267276 | -0,27 | 0,747433721 | 0,12  | 0,903907906 | -0,11 | 0,825258543 | -0,09 | 0,89761151  |
| Gm5105 | 0,31  | 0,464531121 | 0,07  | 0,920880847 | 0,02  | 0,985326269 | -0,12 | 0,812558961 | 0,49  | 0,702993783 |
| Gm5106 | 0,16  | 0,785669218 | 0,18  | 0,716668427 | 0,14  | 0,844868824 | 0,13  | 0,850749612 | 0,13  | 0,899196564 |
| Gm5107 | 0,07  | 0,892823025 | -0,04 | 0,938233008 | -0,01 | 0,991568687 | -0,01 | 0,977608888 | 0,14  | 0,838957343 |
| Gm5108 | 0,68  | 0,399770045 | 0,03  | 0,964757836 | -0,55 | 0,583734191 | 0,15  | 0,722475594 | 0,24  | 0,742080065 |
| Gm5111 | -0,01 | 0,994126393 | 0,04  | 0,958545812 | -0,16 | 0,868609956 | -0,11 | 0,854342596 | -0,03 | 0,976345724 |
| Gm5113 | -0,25 | 0,834744248 | -0,19 | 0,936414321 | 0,54  | 0,529670332 | -0,54 | 0,77073646  | -0,07 | 0,977212067 |
| Gm5114 | -0,14 | 0,78476082  | 0,35  | 0,637232635 | -0,01 | 0,992239414 | -0,68 | 0,097913459 | -0,3  | 0,735152891 |
| Gm5122 | 0,14  | 0,797276781 | -0,15 | 0,756778611 | -0,78 | 0,085429661 | -0,08 | 0,866054559 | -0,02 | 0,981677577 |
| Gm5124 | -0,13 | 0,823225169 | 0,23  | 0,590722193 | 0,03  | 0,973732268 | 0,05  | 0,917720451 | 0,22  | 0,694233384 |
| Gm5126 | 0,12  | 0,849907632 | 0,02  | 0,984409329 | -0,16 | 0,816883729 | -0,05 | 0,895892607 | -0,1  | 0,911575892 |
| Gm5127 | -0,32 | 0,700762684 | -0,03 | 0,989177405 | 0,01  | 0,996946245 | 0,27  | 0,661916932 | 0,29  | 0,729208209 |
| Gm5129 | -0,5  | 0,24782842  | -0,04 | 0,984121306 | -0,21 | 0,850907873 | -0,6  | 0,212666842 | 0     | 0,996410895 |
| Gm5132 | 0,13  | 0,878236686 | 0,15  | 0,868698739 | 0,12  | 0,926982123 | 0,26  | 0,537243203 | 0,81  | 0,162997111 |

|        |       |             |       |             |       |             |       |             |       |             |
|--------|-------|-------------|-------|-------------|-------|-------------|-------|-------------|-------|-------------|
| Gm5134 | 0     | 0,999288019 | 0,34  | 0,782652703 | -0,41 | 0,404120029 | -0,31 | 0,501004985 | -0,2  | 0,765809384 |
| Gm5136 | 0,23  | 0,659983324 | 0,11  | 0,805949528 | -0,5  | 0,437087993 | 0,12  | 0,754318983 | 0,35  | 0,515067033 |
| Gm5141 | -0,04 | 0,948926586 | -0,1  | 0,859932049 | 0,07  | 0,936059691 | -0,25 | 0,628866389 | 0,05  | 0,952296554 |
| Gm5142 | 0,43  | 0,571153956 | -0,09 | 0,957600102 | 0,42  | 0,38818495  | 0,1   | 0,909934077 | 0,4   | 0,414033358 |
| Gm5144 | 0,06  | 0,919567534 | 0,04  | 0,930983876 | -0,12 | 0,872313115 | -0,04 | 0,943143586 | -0,11 | 0,884248437 |
| Gm5148 | 0,11  | 0,892141122 | 0,02  | 0,992175086 | -0,04 | 0,968677508 | 0,35  | 0,506743647 | 0,05  | 0,970154126 |
| Gm5150 | 0,12  | 0,897717279 | -0,5  | 0,489766492 | 1,02  | 0,441848171 | 0,78  | 0,078677403 | -0,06 | 0,975441362 |
| Gm5154 | 0,31  | 0,69656531  | -0,11 | 0,842793123 | 0,13  | 0,906097666 | 0,01  | 0,988538588 | 0,15  | 0,928724353 |
| Gm5155 | 0,12  | 0,869565514 | 0,09  | 0,944131807 | -0,54 | 0,238428106 | -0,13 | 0,74417234  | -0,06 | 0,940438527 |
| Gm5166 | 0,56  | 0,34052888  | -0,55 | 0,467853942 | -0,26 | 0,79007666  | 0,32  | 0,503111332 | 0,13  | 0,872943048 |
| Gm5168 | 0,34  | 0,646090784 | 0,1   | 0,946599376 | 0,46  | 0,470538686 | 0,11  | 0,891547008 | -0,24 | 0,804576732 |
| Gm5169 | 0,22  | 0,871941635 | 0,17  | 0,702102244 | -0,01 | 0,997268369 | -0,49 | 0,380741558 | -0,21 | 0,820234867 |
| Gm5174 | 0,22  | 0,812908506 | 0,23  | 0,641804702 | -0,27 | 0,59755586  | -0,06 | 0,888090219 | -0,33 | 0,649849091 |
| Gm5177 | -0,06 | 0,92590044  | 0,18  | 0,666450149 | 0,03  | 0,971668287 | 0,27  | 0,461412838 | 0,22  | 0,702558142 |
| Gm5244 | 0,11  | 0,839881823 | -0,13 | 0,85624316  | 0,43  | 0,599202081 | 0     | 1           | -0,23 | 0,74933755  |
| Gm525  | -0,14 | 0,843686315 | 0,21  | 0,80192513  | 0,4   | 0,628048897 | -0,99 | 0,075520945 | -0,54 | 0,433940975 |
| Gm527  | -0,5  | 0,665901437 | -0,23 | 0,820137069 | 0,21  | 0,861307315 | -0,96 | 0,116103358 | 0,2   | 0,823098095 |
| Gm5294 | -0,04 | 0,948087131 | 0,33  | 0,707524747 | -0,22 | 0,715547198 | 0,11  | 0,845813504 | 0,03  | 0,979392852 |
| Gm5296 | -0,12 | 0,865689677 | -0,05 | 0,945143056 | 0,06  | 0,958214619 | 0,53  | 0,253851097 | 0,68  | 0,278240482 |
| Gm53   | -0,13 | 0,848780666 | -0,29 | 0,707071624 | 0,27  | 0,736401647 | -1,27 | 0,343210441 | 0,04  | 0,98653183  |
| Gm5334 | 0,26  | 0,5409797   | 0,12  | 0,912340934 | -0,29 | 0,588832774 | 0     | 1           | 0,05  | 0,949248129 |
| Gm534  | -0,08 | 0,856148057 | -0,06 | 0,899052457 | -0,05 | 0,946201063 | 0,01  | 0,983061756 | 0,04  | 0,96506592  |
| Gm5346 | 0,2   | 0,701297763 | -0,08 | 0,913253987 | 0,23  | 0,696939569 | 0,33  | 0,490643311 | 0,33  | 0,66855342  |
| Gm5347 | -0,03 | 0,990404752 | 0,62  | 0,676430742 | 0,03  | 0,987999234 | -0,04 | 0,96402798  | -0,25 | 0,849560772 |
| Gm536  | 0,15  | 0,774473335 | 0,09  | 0,867265251 | 0,09  | 0,884597715 | 0,26  | 0,573546636 | 0,28  | 0,687240111 |
| Gm5373 | 0,12  | 0,78476082  | 0,28  | 0,817367084 | 0,15  | 0,849697489 | 0,13  | 0,727354733 | -0,1  | 0,892547331 |
| Gm5382 | 0,28  | 0,614223987 | 0,22  | 0,78137215  | -0,02 | 0,982305856 | -0,06 | 0,92319561  | -0,74 | 0,117679228 |
| Gm5409 | 0,18  | 0,818611891 | -0,12 | 0,847821325 | -0,22 | 0,688212356 | 0,08  | 0,842011593 | -0,1  | 0,917075631 |
| Gm5414 | -0,55 | 0,711813958 | 0,18  | 0,905535217 | 0,04  | 0,978012085 | 0,59  | 0,638528838 | -0,13 | 0,939448119 |
| Gm5415 | 0     | 0,998210173 | 0,13  | 0,818072947 | -0,09 | 0,897233315 | 0,2   | 0,758588473 | 0,12  | 0,912890826 |
| Gm5416 | 2,44  | 0,106666298 | 0,13  | 0,810875398 | 0,96  | 0,470379063 | 3,4   | 0,004171877 | -0,19 | 0,825311688 |
| Gm5420 | 0,78  | 0,241021853 | -0,26 | 0,887493001 | 0,25  | 0,75035341  | -0,54 | 0,318799672 | 0,2   | 0,726042963 |
| Gm5432 | -0,17 | 0,720829271 | 0,06  | 0,915282997 | -0,17 | 0,795128728 | -0,29 | 0,662848818 | 0,15  | 0,899597352 |
| Gm5434 | -0,47 | 0,455526465 | -0,45 | 0,608123684 | 0,09  | 0,919309335 | 0,36  | 0,661554419 | 0,55  | 0,595837437 |
| Gm5441 | -0,32 | 0,654324758 | 0,47  | 0,69124926  | 0,24  | 0,880622107 | -0,06 | 0,895878968 | -0,06 | 0,960065122 |

|        |       |             |       |             |       |             |       |             |       |             |
|--------|-------|-------------|-------|-------------|-------|-------------|-------|-------------|-------|-------------|
| Gm5444 | 0,05  | 0,949660465 | 0,1   | 0,933075539 | 0,17  | 0,82162081  | 0     | 0,999172681 | 0,05  | 0,953297732 |
| Gm5447 | -0,07 | 0,906430067 | -0,27 | 0,732847182 | -0,45 | 0,326112876 | 0,25  | 0,672057557 | 0,06  | 0,955908741 |
| Gm5458 | 0,68  | 0,094134789 | 0,55  | 0,499573414 | -0,43 | 0,418524099 | 0,49  | 0,294345732 | 0     | 0,996506997 |
| Gm5460 | -0,01 | 0,984972115 | -0,01 | 0,996113371 | -0,07 | 0,923781798 | 0,15  | 0,712887618 | -0,09 | 0,909024113 |
| Gm5464 | 0,2   | 0,815872958 | 0,17  | 0,810340604 | 0,31  | 0,594251544 | 0,12  | 0,855784146 | 0,16  | 0,816652525 |
| Gm5468 | 0,16  | 0,794097262 | 0,01  | 0,992175086 | -0,25 | 0,62103113  | -0,1  | 0,811871922 | -0,07 | 0,937558003 |
| Gm5475 | 0     | 0,996998625 | -0,25 | 0,676644212 | -0,01 | 0,997220401 | 0,33  | 0,334013597 | -0,12 | 0,875421436 |
| Gm5476 | -0,19 | 0,855264133 | -0,06 | 0,947782681 | 0,19  | 0,834042944 | 0,29  | 0,663932331 | -0,02 | 0,987948597 |
| Gm5477 | -0,57 | 0,189644465 | 0,39  | 0,893013712 | -0,42 | 0,626280016 | 0,46  | 0,527170649 | -0,42 | 0,426055761 |
| Gm5478 | 0     | 0,997842309 | -0,11 | 0,857503073 | 0,17  | 0,894109709 | 0,2   | 0,817644043 | 0,07  | 0,976743304 |
| Gm5481 | 0,1   | 0,857433635 | 0,14  | 0,789363581 | 0,29  | 0,808886127 | 0,59  | 0,296435377 | 0,48  | 0,420188399 |
| Gm5483 | 4,66  | 0,03182165  | 0,43  | 0,86198859  | 0,27  | 0,89004987  | 3,12  | 0,019154622 | -0,15 | 0,858534673 |
| Gm5485 | -0,03 | 0,963914207 | -0,12 | 0,853094985 | -0,12 | 0,914965671 | -0,18 | 0,588987424 | 0,04  | 0,961780852 |
| Gm550  | 0,27  | 0,700358581 | -0,14 | 0,794404033 | 0,63  | 0,343594254 | 0,35  | 0,527104424 | 0,07  | 0,943668392 |
| Gm5512 | -0,15 | 0,74764092  | -0,18 | 0,7122758   | -0,38 | 0,614237718 | 0,43  | 0,167552848 | -0,11 | 0,87645265  |
| Gm5523 | 0,1   | 0,889788892 | -0,09 | 0,842793123 | -0,11 | 0,903948251 | 0,91  | 0,078994546 | 0,22  | 0,759610634 |
| Gm5524 | 0,3   | 0,448406902 | -0,03 | 0,960141006 | -0,24 | 0,660610212 | -0,08 | 0,8480134   | 0,02  | 0,979456872 |
| Gm5532 | 0,29  | 0,574186186 | 0,2   | 0,648582774 | -0,36 | 0,436827113 | 0     | 0,999809258 | -0,12 | 0,908324089 |
| Gm5533 | 0,12  | 0,869565514 | 0,17  | 0,7143318   | 0,24  | 0,679895309 | -0,23 | 0,631868374 | -0,08 | 0,922886678 |
| Gm5535 | 0,22  | 0,652352358 | 0,01  | 0,999546407 | -0,1  | 0,895434884 | 0,23  | 0,718433562 | 0,02  | 0,98653183  |
| Gm5538 | -0,17 | 0,820785667 | 0,18  | 0,763005394 | 0,21  | 0,780601987 | -0,33 | 0,44594595  | 0,08  | 0,922086387 |
| Gm5544 | -0,03 | 0,979006273 | 0,12  | 0,873426965 | -0,09 | 0,904132011 | 0,28  | 0,576919988 | -0,01 | 0,992694729 |
| Gm5546 | 0     | 0,999288019 | -0,26 | 0,626813483 | 0,01  | 0,990836784 | 0,36  | 0,470000798 | 0,23  | 0,681597394 |
| Gm5547 | -0,27 | 0,725228866 | -0,11 | 0,850236297 | 0,07  | 0,91684234  | -0,27 | 0,652007823 | -0,25 | 0,844265172 |
| Gm5563 | -0,17 | 0,721797378 | 0,08  | 0,855261337 | -0,36 | 0,479168256 | 0,27  | 0,444799297 | 0,13  | 0,857136358 |
| Gm5565 | 0,07  | 0,937106289 | -0,01 | 0,994730653 | -0,25 | 0,695800929 | -0,03 | 0,980469902 | -0,25 | 0,756083329 |
| Gm5570 | -0,06 | 0,960597621 | 0,28  | 0,65041955  | 0,42  | 0,500849254 | -0,21 | 0,630104458 | 0,23  | 0,71265105  |
| Gm5577 | -0,22 | 0,793172703 | -0,36 | 0,807175471 | 0,36  | 0,669921618 | 0,27  | 0,733598985 | -0,13 | 0,918897359 |
| Gm5590 | -0,05 | 0,94815841  | -0,28 | 0,666450149 | -1,12 | 0,588987171 | -0,24 | 0,636309622 | -0,12 | 0,925858284 |
| Gm5591 | 0,17  | 0,751534367 | 0,09  | 0,868010263 | -0,01 | 0,991240121 | 0,04  | 0,949166455 | -0,02 | 0,982813638 |
| Gm5592 | -0,09 | 0,915348445 | -0,13 | 0,818597532 | 0,09  | 0,928464337 | 0,08  | 0,874069493 | 0,02  | 0,979392852 |
| Gm5595 | -0,66 | 0,701624105 | -0,56 | 0,900801202 | -0,05 | 0,983926261 | -0,47 | 0,825258543 | -0,5  | 0,809383333 |
| Gm5600 | 0,13  | 0,78682706  | 0,1   | 0,916447057 | -0,15 | 0,892881818 | 0,06  | 0,87613802  | -0,03 | 0,975986697 |
| Gm5602 | -0,09 | 0,840727772 | -0,4  | 0,382712211 | 0,04  | 0,967767582 | 0,35  | 0,393217914 | -0,23 | 0,765327693 |
| Gm5606 | -0,01 | 0,98659023  | 0,05  | 0,917623085 | -0,4  | 0,527929204 | -0,04 | 0,931477012 | -0,05 | 0,940438527 |

|        |       |             |       |             |       |             |       |             |       |             |
|--------|-------|-------------|-------|-------------|-------|-------------|-------|-------------|-------|-------------|
| Gm5607 | -0,11 | 0,878162057 | -0,51 | 0,641952023 | -0,39 | 0,628048897 | 0,34  | 0,697336477 | -0,38 | 0,701852402 |
| Gm561  | 0,14  | 0,779331628 | 0,06  | 0,908395059 | -0,1  | 0,947661458 | 0,12  | 0,858632076 | 0,56  | 0,376217331 |
| Gm5615 | 0,06  | 0,92095497  | 0,35  | 0,472042875 | -0,08 | 0,905387534 | -0,29 | 0,371291585 | 0,2   | 0,745574572 |
| Gm5617 | -0,07 | 0,934809007 | -0,21 | 0,738762579 | 0,11  | 0,94110925  | 0,11  | 0,839567244 | -0,22 | 0,800540569 |
| Gm5622 | 0,38  | 0,436086286 | -0,26 | 0,638366221 | -0,2  | 0,772008734 | 0,35  | 0,576053032 | -0,24 | 0,812549515 |
| Gm5627 | 0,22  | 0,576734237 | 0,28  | 0,580930116 | -0,03 | 0,973404462 | 0,22  | 0,582057967 | 0,29  | 0,570469434 |
| Gm5636 | 0,08  | 0,870052902 | 0,05  | 0,925981858 | 0,05  | 0,948085051 | -0,07 | 0,85301747  | -0,24 | 0,699059557 |
| Gm5643 | 0,21  | 0,79795086  | 0,09  | 0,933941404 | -0,17 | 0,79284622  | 0,09  | 0,861959213 | 0,06  | 0,939607682 |
| Gm5662 | 0,18  | 0,789775503 | 0,19  | 0,82505545  | 0,3   | 0,600679499 | 0,03  | 0,94302799  | 0,15  | 0,837252782 |
| Gm568  | -0,03 | 0,969577981 | 0,15  | 0,919762719 | 0,12  | 0,861877024 | -0,54 | 0,582057967 | -0,31 | 0,808079104 |
| Gm5709 | 0,2   | 0,766451086 | -0,22 | 0,817110093 | -0,12 | 0,871929853 | -0,03 | 0,963671917 | 0,07  | 0,947254077 |
| Gm5712 | 0,18  | 0,74495438  | -0,07 | 0,904698551 | 0,04  | 0,959437564 | -0,16 | 0,736730464 | 0,07  | 0,934242963 |
| Gm572  | 0,07  | 0,928103232 | -0,22 | 0,829626088 | -0,06 | 0,945886808 | 0,12  | 0,835175707 | -0,23 | 0,697818445 |
| Gm5724 | -0,11 | 0,903817676 | 0,24  | 0,732044571 | -0,05 | 0,956810799 | -0,07 | 0,931729923 | -0,02 | 0,983514531 |
| Gm5741 | 0     | 0,999679215 | 0,4   | 0,470454944 | 0,17  | 0,813104232 | -0,84 | 0,305432029 | 0,39  | 0,75103789  |
| Gm5751 | -0,04 | 0,984124693 | 0,18  | 0,818072947 | 0,57  | 0,526901752 | -0,38 | 0,626791624 | -0,5  | 0,430951346 |
| Gm5755 | 0,22  | 0,597519827 | -0,14 | 0,839789639 | 0,16  | 0,820240134 | 0     | 1           | -0,08 | 0,929780699 |
| Gm5766 | 0,17  | 0,749658322 | 0,07  | 0,882589938 | -0,19 | 0,766318679 | 0,03  | 0,968267441 | 0,1   | 0,932846086 |
| Gm5767 | 0,14  | 0,841140165 | 0,02  | 0,980518468 | -0,14 | 0,818765944 | -0,16 | 0,701167068 | 0,53  | 0,68216813  |
| Gm5771 | -0,04 | 0,969949459 | -0,02 | 0,985764487 | -0,36 | 0,64019442  | -0,47 | 0,197760953 | 0,13  | 0,858988115 |
| Gm5779 | 0,04  | 0,947630317 | -0,15 | 0,754578715 | 0,17  | 0,868938606 | 0,46  | 0,221861469 | -0,25 | 0,720844381 |
| Gm5784 | 0,16  | 0,795481466 | -0,1  | 0,840278465 | -0,17 | 0,865300863 | -0,07 | 0,855218474 | -0,07 | 0,933307994 |
| Gm5785 | 0,03  | 0,958512892 | 0,1   | 0,852706498 | -0,03 | 0,966921005 | 0,2   | 0,579176433 | 0,13  | 0,860919132 |
| Gm5796 | 1,79  | 0,131867776 | 1,02  | 0,1467574   | -1,8  | 0,046960007 | 2,9   | 0,050988923 | 0,38  | 0,775482866 |
| Gm5800 | -0,07 | 0,897481914 | -0,01 | 0,988250487 | 0     | 0,99879674  | -0,09 | 0,86288133  | -0,11 | 0,88282824  |
| Gm5802 | 0,05  | 0,909656399 | -0,14 | 0,792929643 | -0,22 | 0,663652196 | 0,11  | 0,773449759 | -0,07 | 0,939948423 |
| Gm5803 | -0,19 | 0,76337689  | 0,05  | 0,921610565 | -0,08 | 0,9127937   | -0,04 | 0,937742175 | 0,09  | 0,927807084 |
| Gm5820 | 0,57  | 0,6226265   | 0,78  | 0,678753304 | 1,26  | 0,038411212 | 0,26  | 0,827142198 | 0,19  | 0,909294188 |
| Gm5833 | -0,01 | 0,995438679 | 0,56  | 0,242002134 | 0,26  | 0,830114192 | -0,53 | 0,335954015 | -0,4  | 0,587305934 |
| Gm5849 | 0,14  | 0,820023436 | 0,21  | 0,728669599 | -0,13 | 0,82162081  | -0,05 | 0,919263182 | 0,26  | 0,652022884 |
| Gm5859 | 0,02  | 0,96528686  | -0,22 | 0,738762579 | -0,05 | 0,975055092 | 0,86  | 0,078120606 | -0,76 | 0,260832795 |
| Gm5860 | 0,3   | 0,461259196 | -0,06 | 0,927205716 | -0,03 | 0,981728622 | 0,12  | 0,849026566 | 0,2   | 0,733610761 |
| Gm5868 | -0,2  | 0,727387897 | -0,06 | 0,933943587 | 0,06  | 0,949334141 | 0,09  | 0,911250912 | -0,05 | 0,965348932 |
| Gm5878 | -0,14 | 0,885454906 | 0,56  | 0,457889449 | -0,7  | 0,29239254  | -0,15 | 0,830826638 | 0,35  | 0,697757911 |
| Gm5879 | -0,07 | 0,86967476  | 0,11  | 0,848835547 | 0,22  | 0,697383223 | 0,4   | 0,389492505 | 0,29  | 0,652746284 |



|        |       |             |       |             |       |             |       |             |       |             |
|--------|-------|-------------|-------|-------------|-------|-------------|-------|-------------|-------|-------------|
| Gm5885 | 0,07  | 0,881152048 | 0,11  | 0,851141302 | 0,03  | 0,964423425 | 0,03  | 0,953429313 | 0,11  | 0,87645265  |
| Gm5886 | 0,22  | 0,708296676 | 0,06  | 0,902847035 | 0,17  | 0,747950844 | 0,27  | 0,572854044 | 0,31  | 0,575543402 |
| Gm5893 | 0,28  | 0,697356307 | 0,26  | 0,693906911 | -0,08 | 0,909346907 | -0,17 | 0,856743071 | 0,23  | 0,745134899 |
| Gm5897 | 0,39  | 0,493149055 | 0,3   | 0,674948431 | -0,05 | 0,956894731 | -0,69 | 0,108183203 | -0,63 | 0,341860858 |
| Gm590  | 0,04  | 0,958188047 | 0,14  | 0,775483469 | 0,17  | 0,805783058 | -0,34 | 0,610866466 | 0,05  | 0,960974478 |
| Gm5901 | -0,13 | 0,808947569 | -0,34 | 0,807471759 | -0,28 | 0,729592327 | 0,55  | 0,100777201 | 0,21  | 0,773125975 |
| Gm5914 | 0,55  | 0,424529546 | 0,19  | 0,770521007 | 0,13  | 0,919116989 | -0,27 | 0,748624668 | -0,14 | 0,93193727  |
| Gm5916 | 0,58  | 0,357054834 | 0,53  | 0,713825982 | 0,39  | 0,689058581 | -0,36 | 0,697364261 | 0,18  | 0,788659175 |
| Gm5919 | -0,08 | 0,877096932 | 0,09  | 0,863064855 | -0,24 | 0,680127367 | -0,11 | 0,794457139 | 0,14  | 0,843351909 |
| Gm5922 | 0,01  | 0,984124693 | 0,06  | 0,89205859  | -0,09 | 0,902672106 | -0,05 | 0,914640741 | 0,37  | 0,505021443 |
| Gm5925 | 0,33  | 0,59710379  | 0,2   | 0,727848017 | -0,09 | 0,899171797 | -0,32 | 0,519380432 | -0,13 | 0,904040121 |
| Gm5936 | 0,07  | 0,898269435 | 0,25  | 0,640836969 | 0,16  | 0,856046789 | -0,01 | 0,988777946 | -0,07 | 0,932948414 |
| Gm5938 | 0,11  | 0,841267394 | 0,22  | 0,827064865 | -0,75 | 0,374610064 | 0,08  | 0,924303497 | -0,1  | 0,926008345 |
| Gm5941 | 0,28  | 0,552300521 | -0,02 | 0,993063169 | -0,26 | 0,785676028 | -0,01 | 0,997827705 | 0,29  | 0,811975973 |
| Gm595  | -0,13 | 0,84515428  | -0,03 | 0,981635653 | 0,22  | 0,663430276 | -0,03 | 0,967047406 | 0,01  | 0,989665382 |
| Gm5965 | 0,12  | 0,841140165 | 0,47  | 0,429168189 | -0,19 | 0,772397144 | -0,04 | 0,935243415 | 0,28  | 0,680015121 |
| Gm597  | 0,33  | 0,656095444 | -0,29 | 0,855822577 | 0,27  | 0,763691662 | 0,43  | 0,432664716 | -0,13 | 0,891925115 |
| Gm6020 | -0,09 | 0,892141122 | 0,18  | 0,842430108 | -0,12 | 0,840187016 | -0,24 | 0,793863317 | -0,36 | 0,738853855 |
| Gm6034 | -0,02 | 0,983950719 | 0,27  | 0,829626088 | -0,22 | 0,771873685 | -0,28 | 0,53999606  | -0,27 | 0,661640717 |
| Gm6040 | -0,01 | 0,990894139 | 0,09  | 0,880048264 | -0,25 | 0,825782434 | 0,2   | 0,861140391 | 0,75  | 0,375162254 |
| Gm6042 | -0,09 | 0,896971363 | 0,1   | 0,838684509 | 0     | 0,999931921 | 0,29  | 0,50808678  | 0,29  | 0,714465859 |
| Gm6086 | -0,1  | 0,840621481 | 0,39  | 0,642056258 | 0,36  | 0,717856288 | -0,14 | 0,902706786 | 0,31  | 0,7446186   |
| Gm609  | -0,3  | 0,675654683 | 0,22  | 0,706346725 | 0,02  | 0,985347628 | -1,4  | 0,161626639 | 0,01  | 0,995722775 |
| Gm6116 | 0,21  | 0,776721795 | -0,1  | 0,934280572 | 0,01  | 0,993379272 | 0,28  | 0,567919709 | -0,19 | 0,823776279 |
| Gm6117 | 0,05  | 0,928103232 | 0,08  | 0,872187376 | 0,07  | 0,934767777 | 0,04  | 0,948141338 | 0,04  | 0,961406182 |
| Gm6133 | 0,45  | 0,376876732 | -0,08 | 0,90164068  | -0,09 | 0,873583602 | 0,11  | 0,866391439 | -0,24 | 0,762105118 |
| Gm614  | 0,05  | 0,964272364 | 0,04  | 0,982701095 | -0,75 | 0,368726841 | 1,68  | 0,028411965 | 1,66  | 0,109294088 |
| Gm6150 | 0,3   | 0,778869381 | 0,13  | 0,852068212 | -0,56 | 0,514947266 | 0,22  | 0,521014027 | 0,34  | 0,574285481 |
| Gm6155 | 0,07  | 0,899665723 | -0,09 | 0,854940418 | -0,03 | 0,965775869 | -0,08 | 0,855784146 | 0,12  | 0,861236592 |
| Gm6194 | -0,11 | 0,835027547 | -0,1  | 0,839789639 | -0,08 | 0,906097666 | 0,63  | 0,173128097 | 0,14  | 0,859735946 |
| Gm6211 | -0,25 | 0,528638029 | -0,21 | 0,617339955 | 0,13  | 0,815151406 | 0,51  | 0,19937858  | 0,17  | 0,815177988 |
| Gm6213 | 0,12  | 0,81925245  | 0,25  | 0,539562852 | -0,2  | 0,824682741 | -3,02 | 0,040875837 | -0,55 | 0,737904364 |
| Gm6222 | -0,35 | 0,433848441 | 0,19  | 0,6840278   | -0,41 | 0,637224758 | -0,2  | 0,575297022 | -0,12 | 0,846526184 |
| Gm6225 | 0,5   | 0,166120408 | -0,21 | 0,839283725 | -0,37 | 0,668567922 | -0,25 | 0,669326407 | -0,23 | 0,801087157 |
| Gm6249 | -0,02 | 0,984183715 | 0,28  | 0,664787536 | 0,27  | 0,775290551 | 0,56  | 0,48485622  | 0,04  | 0,975200543 |

|        |       |             |       |             |       |             |       |             |       |             |
|--------|-------|-------------|-------|-------------|-------|-------------|-------|-------------|-------|-------------|
| Gm626  | 0,37  | 0,494964942 | -0,38 | 0,601390176 | 0,19  | 0,770526999 | 0,52  | 0,134154088 | 0,15  | 0,827532593 |
| Gm6260 | 0,42  | 0,54401985  | -0,32 | 0,720667099 | 0,06  | 0,968269775 | -0,07 | 0,957432042 | 0,25  | 0,864292286 |
| Gm6268 | -0,14 | 0,782749939 | -0,01 | 0,994137877 | 0,09  | 0,882540073 | -0,13 | 0,780971971 | -0,01 | 0,992671375 |
| Gm6277 | -0,6  | 0,148685247 | -0,25 | 0,689924866 | -0,03 | 0,978012085 | -2,17 | 0,028909424 | -1,01 | 0,195288262 |
| Gm6288 | -0,29 | 0,698476713 | 0,33  | 0,839789639 | 0,12  | 0,909450543 | 0,03  | 0,963752888 | 0,98  | 0,254218888 |
| Gm6297 | 0,53  | 0,71726775  | -0,22 | 0,882589938 | 0,12  | 0,946842192 | -0,88 | 0,312438483 | 0,52  | 0,491156613 |
| Gm6300 | 0,25  | 0,609158244 | -0,15 | 0,774278866 | -0,01 | 0,99129124  | 0,16  | 0,674213878 | 0     | 0,997794713 |
| Gm6307 | -0,19 | 0,746089929 | -0,09 | 0,888759454 | -0,07 | 0,914958877 | 0,3   | 0,521184735 | 0,22  | 0,763240477 |
| Gm6313 | -0,15 | 0,78476082  | 0,19  | 0,88325516  | -0,27 | 0,670926345 | -0,02 | 0,981610833 | 0,54  | 0,253125485 |
| Gm6329 | 0,28  | 0,754969448 | 0,08  | 0,940046211 | 0,04  | 0,966910505 | -0,02 | 0,959958662 | -0,04 | 0,969617491 |
| Gm6345 | 0,18  | 0,673291416 | 0,04  | 0,934294134 | -0,25 | 0,690061606 | 0,1   | 0,778773256 | 0,29  | 0,580759523 |
| Gm6370 | 0,44  | 0,600952042 | 0,01  | 0,998878374 | -0,35 | 0,637321546 | 0,23  | 0,719756575 | -0,37 | 0,699996356 |
| Gm6377 | 0,86  | 0,318333634 | -0,02 | 0,997674941 | 0,22  | 0,661089127 | 0,92  | 0,207674182 | -0,09 | 0,948163009 |
| Gm6402 | -0,17 | 0,848837214 | 0,14  | 0,88052282  | -0,1  | 0,934056359 | -0,07 | 0,928002892 | -0,36 | 0,654271552 |
| Gm6408 | 0,38  | 0,418979767 | -0,06 | 0,951698468 | -0,56 | 0,233459634 | -0,25 | 0,552731038 | -0,46 | 0,328821044 |
| Gm6410 | 0,34  | 0,578154278 | 0,06  | 0,9152526   | -0,29 | 0,763933957 | 0,05  | 0,943864463 | 0,11  | 0,910249438 |
| Gm6416 | 0,07  | 0,930134702 | -0,03 | 0,98236208  | -0,32 | 0,638965268 | -0,06 | 0,892039816 | -0,11 | 0,890833196 |
| Gm6420 | -0,03 | 0,959044734 | 0,03  | 0,951647929 | -0,13 | 0,813287877 | 0,05  | 0,90213506  | 0,01  | 0,993413582 |
| Gm6444 | -0,06 | 0,903817676 | 0,05  | 0,946885634 | 0,14  | 0,911601881 | 0,15  | 0,781338312 | 0,17  | 0,792404969 |
| Gm6455 | 0,15  | 0,770273483 | -0,04 | 0,974306445 | 0     | 0,999931921 | -0,11 | 0,926704232 | 0,05  | 0,965348932 |
| Gm6460 | -0,19 | 0,94918265  | 0,75  | 0,828219939 | -1,28 | 0,435556279 | -2,67 | 0,141376967 | -0,56 | 0,738260196 |
| Gm6471 | 0,14  | 0,818078224 | -0,03 | 0,982328934 | -0,21 | 0,874098993 | -0,24 | 0,769870404 | -0,5  | 0,416134174 |
| Gm648  | 0,57  | 0,400822208 | 0,09  | 0,9554581   | 0,18  | 0,804576742 | -0,01 | 0,978056041 | 0,2   | 0,825990389 |
| Gm6498 | -0,27 | 0,787936419 | -0,67 | 0,225178648 | 0,04  | 0,968742139 | 0,4   | 0,479726514 | -0,2  | 0,804576732 |
| Gm6524 | -0,1  | 0,883923631 | 0,17  | 0,834836889 | 0,02  | 0,984407511 | -0,19 | 0,744110524 | -0,04 | 0,960313057 |
| Gm6525 | 0     | 1           | 0,2   | 0,832369851 | -0,26 | 0,817818413 | -0,12 | 0,741640787 | -0,42 | 0,551972106 |
| Gm6548 | 0,46  | 0,357726359 | 0,67  | 0,16121328  | -0,78 | 0,079340676 | 0,23  | 0,667468658 | 0,9   | 0,113935413 |
| Gm6557 | 0,1   | 0,822107047 | 0,04  | 0,951698468 | 0,02  | 0,989909058 | -0,09 | 0,867914682 | -0,01 | 0,988334908 |
| Gm6567 | -0,08 | 0,92812108  | 0,04  | 0,936414321 | -0,38 | 0,57717258  | 0,07  | 0,867953377 | 0,07  | 0,939607682 |
| Gm6568 | -0,08 | 0,921565185 | 0,23  | 0,71865307  | -0,02 | 0,981393315 | -0,08 | 0,846785568 | 0,12  | 0,859581581 |
| Gm6570 | -0,05 | 0,914090929 | 0,15  | 0,765325717 | -0,1  | 0,904516738 | 0,12  | 0,76520917  | 0,03  | 0,974110019 |
| Gm6578 | -0,06 | 0,943079514 | 0,13  | 0,817110093 | -0,1  | 0,90672161  | -0,46 | 0,420644177 | -0,15 | 0,907798813 |
| Gm6579 | -0,07 | 0,874642503 | 0     | 1           | -0,78 | 0,333516073 | 0,03  | 0,939923564 | 0,34  | 0,603995357 |
| Gm6583 | -0,17 | 0,829889828 | 0,02  | 0,978689001 | -0,1  | 0,882993082 | 0,04  | 0,943143586 | -0,14 | 0,904836805 |
| Gm6588 | 0,53  | 0,378598836 | -0,15 | 0,882589938 | -0,23 | 0,862869965 | -0,12 | 0,908141892 | 0,43  | 0,550083777 |

|        |       |             |       |             |       |             |       |             |       |             |
|--------|-------|-------------|-------|-------------|-------|-------------|-------|-------------|-------|-------------|
| Gm6590 | 0,31  | 0,672894311 | 0,45  | 0,690263811 | -0,1  | 0,906275304 | -0,23 | 0,725875797 | 0,35  | 0,666547591 |
| Gm6592 | -0,12 | 0,897747251 | 0,23  | 0,559630539 | -0,13 | 0,823823322 | -0,41 | 0,409914151 | -0,18 | 0,795033998 |
| Gm6600 | -0,15 | 0,87143427  | 0,1   | 0,954948291 | -0,2  | 0,808747196 | 0,21  | 0,840657538 | 0,64  | 0,447019099 |
| Gm6602 | -0,05 | 0,937215205 | -0,03 | 0,954948291 | -0,2  | 0,735564909 | 0,2   | 0,648069093 | -0,06 | 0,950267521 |
| Gm6607 | -0,08 | 0,910823707 | 0,11  | 0,847885195 | 0,18  | 0,751090942 | -0,06 | 0,94180692  | -0,08 | 0,940438527 |
| Gm6614 | 0,09  | 0,939308558 | 0,6   | 0,459417799 | -0,54 | 0,552093103 | -0,45 | 0,330112711 | -0,56 | 0,336101453 |
| Gm6623 | 0,17  | 0,77892269  | 0,15  | 0,764475941 | -0,09 | 0,878717363 | 0,03  | 0,959359303 | 0,06  | 0,958068117 |
| Gm6634 | 0,04  | 0,958821517 | -0,16 | 0,907700167 | 0,46  | 0,683331533 | 0,86  | 0,11470548  | -0,02 | 0,983469081 |
| Gm6637 | -0,08 | 0,922118639 | -0,16 | 0,75336328  | -0,47 | 0,469053827 | -0,21 | 0,900918368 | -0,63 | 0,623214829 |
| Gm6639 | -0,04 | 0,946792769 | 0,32  | 0,556617566 | -0,12 | 0,857100866 | -0,04 | 0,940292598 | 0,13  | 0,860877067 |
| Gm6642 | 0,23  | 0,57672557  | -0,15 | 0,763796207 | -0,3  | 0,475944471 | 0,29  | 0,768880868 | 0,51  | 0,623046105 |
| Gm6644 | -0,71 | 0,123013731 | -0,58 | 0,337618435 | -0,06 | 0,957152002 | -0,25 | 0,766991309 | 0,31  | 0,838957343 |
| Gm6653 | 0,07  | 0,874146026 | -0,21 | 0,649542145 | 0,16  | 0,798838043 | -0,01 | 0,988205241 | 0,07  | 0,936246118 |
| Gm6654 | 0,17  | 0,710008429 | 0,07  | 0,88325516  | -0,17 | 0,781174092 | -0,05 | 0,908535783 | 0,13  | 0,838530657 |
| Gm6657 | 0,23  | 0,728070448 | -0,1  | 0,955382206 | 0,03  | 0,973341568 | -0,39 | 0,740434535 | -0,36 | 0,813513601 |
| Gm6658 | -0,23 | 0,504621759 | -0,06 | 0,90781211  | -0,05 | 0,946952673 | 0,03  | 0,95215984  | 0,03  | 0,977775233 |
| Gm6729 | -0,21 | 0,719941262 | -0,01 | 0,99460836  | 0,13  | 0,814575035 | 0,01  | 0,992906132 | 0,25  | 0,675519772 |
| Gm6744 | 0,09  | 0,833900133 | -0,06 | 0,903595287 | -0,26 | 0,624057916 | 0,1   | 0,805169421 | 0,1   | 0,886154125 |
| Gm6756 | 0,01  | 0,986636441 | 0,09  | 0,956145324 | -0,07 | 0,947460329 | -0,24 | 0,495340036 | -0,19 | 0,777561251 |
| Gm6760 | -0,24 | 0,658095963 | 0,16  | 0,812846372 | -0,2  | 0,779486228 | 0,51  | 0,393347892 | 0,6   | 0,389151645 |
| Gm6787 | -0,1  | 0,930846275 | -0,29 | 0,726578334 | 0,15  | 0,837088175 | 0,39  | 0,523255995 | 0,26  | 0,827532593 |
| Gm6792 | 0,59  | 0,377974891 | 0,25  | 0,541570411 | -0,24 | 0,698004823 | -0,49 | 0,452578546 | 0,25  | 0,675282484 |
| Gm6793 | -0,17 | 0,666546952 | 0,22  | 0,72545882  | -0,27 | 0,628048897 | -0,14 | 0,72670212  | 0,73  | 0,442579293 |
| Gm684  | 0,13  | 0,869225685 | 0,03  | 0,989873399 | -0,29 | 0,660920525 | -2,49 | 0,017720847 | -0,91 | 0,374616846 |
| Gm6867 | 0,35  | 0,353358961 | 0,31  | 0,464360937 | -0,07 | 0,941627748 | -0,01 | 0,984136649 | 0,35  | 0,50483975  |
| Gm6878 | 0,26  | 0,683531628 | 0,01  | 0,995123842 | -0,1  | 0,882540073 | -0,14 | 0,751826661 | -0,02 | 0,982611614 |
| Gm6880 | 0,23  | 0,828767158 | -0,48 | 0,438549879 | -0,18 | 0,834069966 | 0,11  | 0,810508503 | -0,07 | 0,967522546 |
| Gm6890 | 0,03  | 0,964318719 | 0,09  | 0,856847963 | 0,03  | 0,970969012 | -0,02 | 0,988559695 | -0,17 | 0,890957032 |
| Gm6899 | 0,13  | 0,778869381 | 0,11  | 0,825192868 | -0,13 | 0,855381787 | -0,12 | 0,806145597 | 0,01  | 0,99004065  |
| Gm6904 | -0,11 | 0,872419325 | 0,48  | 0,848488038 | -0,59 | 0,440115938 | -2,39 | 0,01465719  | 1,68  | 0,074506144 |
| Gm6929 | -0,16 | 0,692490424 | -0,16 | 0,755498335 | 0,08  | 0,903918012 | 0,31  | 0,41499679  | 0,3   | 0,622612735 |
| Gm6934 | -0,27 | 0,561405935 | 0,07  | 0,893262563 | 0,03  | 0,973006385 | 0,11  | 0,900641924 | -0,15 | 0,862984047 |
| Gm6936 | 0     | 0,997842309 | 0,19  | 0,703066691 | 0,08  | 0,909371204 | 0,05  | 0,93195563  | 0,12  | 0,895464476 |
| Gm6938 | 0,33  | 0,5261831   | 0,12  | 0,837870165 | -0,39 | 0,480918162 | 0,12  | 0,821175937 | 0,27  | 0,686411448 |
| Gm694  | 0,29  | 0,770253953 | 0,1   | 0,934280572 | -0,24 | 0,716894796 | 0,13  | 0,845933441 | 0,33  | 0,588685273 |

|        |       |             |       |             |       |             |       |             |       |             |
|--------|-------|-------------|-------|-------------|-------|-------------|-------|-------------|-------|-------------|
| Gm6958 | -0,15 | 0,778869381 | 0,01  | 0,994376785 | -0,11 | 0,876005604 | 0,04  | 0,932489351 | 0,15  | 0,818825401 |
| Gm6981 | 0,1   | 0,865776054 | 0,03  | 0,978904487 | 0,13  | 0,820881741 | 0,56  | 0,142915319 | 0,17  | 0,830086988 |
| Gm6987 | 0,08  | 0,884439006 | 0,14  | 0,741295705 | -0,07 | 0,911921787 | 0,33  | 0,389981292 | 0,2   | 0,75509516  |
| Gm6994 | 0,08  | 0,935927529 | 0,41  | 0,561562373 | -0,27 | 0,737821076 | 0,16  | 0,892186579 | 0,15  | 0,911850421 |
| Gm6999 | 0,16  | 0,832696131 | -0,12 | 0,917821097 | -0,01 | 0,993457242 | 0,26  | 0,4272539   | 0,09  | 0,89529118  |
| Gm7008 | -0,3  | 0,548190621 | -0,02 | 0,992929085 | -0,19 | 0,722149463 | -0,01 | 0,991106603 | 0,19  | 0,836061657 |
| Gm7030 | 0,02  | 0,983694436 | -0,19 | 0,614371928 | 0,17  | 0,786116942 | 0,27  | 0,577360837 | -0,2  | 0,804610823 |
| Gm7056 | -0,08 | 0,903817676 | -0,07 | 0,883895522 | -0,14 | 0,820892001 | 0,09  | 0,858659989 | -0,01 | 0,992607235 |
| Gm7068 | -0,2  | 0,796476889 | 0,11  | 0,942965593 | -0,34 | 0,66611828  | -0,22 | 0,784621098 | -0,3  | 0,765327693 |
| Gm7073 | 0,11  | 0,852358078 | -0,04 | 0,969314504 | -0,14 | 0,840730961 | 0,12  | 0,87148686  | 0,18  | 0,841883545 |
| Gm7102 | 0,02  | 0,972112267 | -0,24 | 0,732847182 | -0,15 | 0,875089034 | -0,13 | 0,736062864 | -0,15 | 0,894709836 |
| Gm7104 | 0     | 0,999549745 | -0,06 | 0,943713379 | -0,33 | 0,625876541 | -0,06 | 0,943938445 | 0,23  | 0,768884521 |
| Gm7120 | -0,13 | 0,920798295 | -0,69 | 0,702811088 | -0,77 | 0,590619197 | 0,19  | 0,784099439 | 0,26  | 0,836061657 |
| Gm7133 | 0,23  | 0,729875479 | -0,28 | 0,689193472 | 0,09  | 0,927950027 | 0,58  | 0,193540714 | 0     | 0,99888749  |
| Gm7134 | 0,04  | 0,928103232 | 0,04  | 0,938944149 | 0,06  | 0,922318683 | 0,2   | 0,588770362 | 0,18  | 0,763603061 |
| Gm7135 | 0,2   | 0,738448626 | -0,05 | 0,918694468 | -0,15 | 0,840087543 | 0,03  | 0,95852873  | -0,15 | 0,830788023 |
| Gm715  | 0,06  | 0,9231839   | 0     | 1           | -0,2  | 0,689058581 | 0     | 0,997816344 | 0,22  | 0,668747774 |
| Gm7160 | 0,01  | 0,998307191 | 0,59  | 0,739345787 | -0,51 | 0,823005714 | -0,19 | 0,886243506 | 0,97  | 0,395499484 |
| Gm7167 | -0,07 | 0,902359494 | 0,13  | 0,765982952 | -0,18 | 0,72066129  | 0     | 0,993337409 | -0,08 | 0,916297433 |
| Gm7168 | 0,18  | 0,791284141 | 0,12  | 0,912535732 | -0,21 | 0,770526999 | 0,32  | 0,414522125 | -0,15 | 0,86570087  |
| Gm7173 | -0,13 | 0,841140165 | -0,36 | 0,638366221 | -0,05 | 0,95106142  | 0,21  | 0,728291963 | -0,16 | 0,874829878 |
| Gm7244 | 0,21  | 0,665960047 | 0,21  | 0,697830948 | -0,01 | 0,995363482 | -0,17 | 0,663875303 | 0,08  | 0,932268703 |
| Gm7247 | 0,22  | 0,810129283 | 0,32  | 0,563746321 | -0,35 | 0,729446768 | 0,18  | 0,77238043  | 0,62  | 0,283372038 |
| Gm725  | 0,13  | 0,808947569 | 0     | 1           | -0,11 | 0,856636502 | 0,07  | 0,875671556 | -0,11 | 0,878914713 |
| Gm7257 | 0,43  | 0,673291416 | -0,09 | 0,917863429 | -0,48 | 0,69871815  | 0,19  | 0,697667786 | 0,22  | 0,702558142 |
| Gm7265 | -0,68 | 0,526505859 | 0,04  | 0,971372541 | 0,55  | 0,641381759 | -1,03 | 0,100593191 | -0,25 | 0,731982784 |
| Gm7271 | 0,11  | 0,893137556 | 0,14  | 0,769551285 | 0,1   | 0,901539354 | -0,08 | 0,899003207 | 0,19  | 0,789505562 |
| Gm7276 | 0,41  | 0,438318142 | 0,03  | 0,956555856 | 0,05  | 0,938291859 | -0,05 | 0,947253238 | -0,03 | 0,977775233 |
| Gm732  | 0,21  | 0,704720946 | 0,58  | 0,448431001 | -0,08 | 0,939468746 | -0,41 | 0,367908306 | 0,39  | 0,553642892 |
| Gm7325 | 0,05  | 0,937892805 | -0,33 | 0,674709201 | -0,12 | 0,885556448 | 0,11  | 0,831252023 | 0,23  | 0,657070737 |
| Gm7337 | 0,22  | 0,736503749 | 0,17  | 0,793842674 | -0,13 | 0,888677583 | -0,06 | 0,952768654 | -0,01 | 0,991559961 |
| Gm7358 | 0,42  | 0,597519827 | 0,05  | 0,949437852 | 0,04  | 0,948712735 | -0,02 | 0,970247298 | 0,28  | 0,657201901 |
| Gm7367 | 0,36  | 0,643129732 | -0,19 | 0,797124845 | -0,16 | 0,876005604 | -0,2  | 0,659350243 | 0,11  | 0,916173996 |
| Gm7443 | -0,09 | 0,830575431 | 0,04  | 0,934627513 | 0,04  | 0,952366216 | 0,01  | 0,992183086 | -0,28 | 0,697757911 |
| Gm7444 | -0,01 | 0,98701986  | -0,18 | 0,751704055 | -0,21 | 0,680948927 | -0,01 | 0,988611217 | 0,29  | 0,709567735 |

|        |       |             |       |             |       |             |       |             |       |             |
|--------|-------|-------------|-------|-------------|-------|-------------|-------|-------------|-------|-------------|
| Gm7457 | -0,08 | 0,925859559 | -0,36 | 0,365822265 | -0,48 | 0,397693333 | 0,21  | 0,592708932 | -0,07 | 0,952366605 |
| Gm7461 | 0     | 0,996998625 | 0,02  | 0,985373807 | 0,04  | 0,952366216 | 0,03  | 0,963001955 | 0,15  | 0,840887217 |
| Gm7467 | -0,13 | 0,75819156  | -0,03 | 0,958856577 | -0,04 | 0,965539887 | -0,03 | 0,942912074 | 0,01  | 0,98653183  |
| Gm7489 | 0,3   | 0,439995052 | 0,2   | 0,633883634 | 0,2   | 0,790401057 | -0,05 | 0,954851353 | 0,1   | 0,932056921 |
| Gm7534 | -0,2  | 0,743650884 | -0,21 | 0,883145635 | -0,16 | 0,875089034 | 0,12  | 0,881334406 | 0,27  | 0,646672171 |
| Gm7538 | 0,29  | 0,493149055 | 0,24  | 0,593915324 | 0,26  | 0,611144549 | 0,03  | 0,965653854 | 0,41  | 0,545166604 |
| Gm7550 | 0,28  | 0,515553718 | 0,36  | 0,568187167 | -0,09 | 0,906275304 | -0,05 | 0,90264563  | 0,31  | 0,647876293 |
| Gm7562 | 0,02  | 0,96924106  | 0,02  | 0,972807995 | -0,09 | 0,874808392 | -0,08 | 0,867221814 | 0,01  | 0,992696955 |
| Gm7598 | 0,21  | 0,731774338 | 0,53  | 0,242002134 | -0,48 | 0,565500456 | -0,89 | 0,264921988 | -0,27 | 0,831449955 |
| Gm7609 | 0,64  | 0,703606438 | -0,9  | 0,383504117 | -0,47 | 0,500343254 | -0,29 | 0,623729452 | 0,14  | 0,914498972 |
| Gm7616 | -0,03 | 0,963914207 | -0,05 | 0,937377463 | -0,08 | 0,926974012 | 0,37  | 0,318097982 | 0,53  | 0,235574745 |
| Gm7628 | -0,05 | 0,930846275 | -0,07 | 0,89647435  | -0,5  | 0,645449124 | -0,06 | 0,900918368 | -0,21 | 0,74590767  |
| Gm765  | 0,45  | 0,539226089 | 0,12  | 0,877770697 | 0,28  | 0,721083003 | 0,34  | 0,586839812 | 0     | 0,999621987 |
| Gm766  | 0,23  | 0,687694204 | 0,35  | 0,738398576 | 0,09  | 0,914774845 | -0,26 | 0,406609605 | 0,15  | 0,801417796 |
| Gm7694 | -0,36 | 0,464604854 | -0,65 | 0,373481142 | 0,3   | 0,770526999 | 0,03  | 0,976626773 | 0,05  | 0,969617491 |
| Gm7710 | 0,24  | 0,676134358 | -0,13 | 0,790939978 | -0,13 | 0,820601869 | 0,04  | 0,923775458 | 0,1   | 0,916837154 |
| Gm7714 | 0,4   | 0,68161851  | 0,03  | 0,992929085 | -0,01 | 0,994700527 | -0,27 | 0,618453093 | -0,24 | 0,765809384 |
| Gm773  | 0,16  | 0,902628825 | -0,28 | 0,747318279 | 0,82  | 0,114529044 | -0,32 | 0,549014569 | -0,03 | 0,977775233 |
| Gm7819 | 0,37  | 0,594739156 | 0,57  | 0,395964974 | -0,74 | 0,516309915 | 0,05  | 0,940513545 | 0,51  | 0,653769438 |
| Gm7854 | 0,2   | 0,864403632 | 0,35  | 0,813516293 | -0,27 | 0,70398922  | -0,83 | 0,267639393 | -0,51 | 0,62559702  |
| Gm7897 | 0,52  | 0,357553901 | -0,25 | 0,654719935 | -0,22 | 0,647365248 | -0,11 | 0,907485612 | 0,35  | 0,587305934 |
| Gm7904 | 0     | 0,996219097 | 0,14  | 0,761820188 | -0,07 | 0,935877713 | -0,54 | 0,697336477 | -0,23 | 0,917347603 |
| Gm7932 | -0,02 | 0,976977482 | 0,15  | 0,781665479 | -0,28 | 0,657357599 | 0,12  | 0,780045105 | 0,1   | 0,907046137 |
| Gm7969 | 0,3   | 0,556654251 | 0,08  | 0,852719676 | -0,3  | 0,532062339 | 0,1   | 0,848001401 | 0,05  | 0,959848565 |
| Gm7972 | 0,87  | 0,632856963 | 0,36  | 0,825692608 | -0,36 | 0,546286708 | -0,43 | 0,829087694 | -0,77 | 0,623524521 |
| Gm7977 | -0,21 | 0,612702073 | -0,04 | 0,932918674 | 0,13  | 0,859389184 | 0,29  | 0,415968391 | 0,4   | 0,387839376 |
| Gm7982 | 0,13  | 0,802029256 | 0,31  | 0,640299669 | 0,15  | 0,828424248 | -0,12 | 0,793134304 | 0,12  | 0,858981977 |
| Gm805  | -0,11 | 0,911411194 | 0,27  | 0,801257272 | -0,27 | 0,672490033 | 0,24  | 0,749115749 | 0,07  | 0,951236192 |
| Gm807  | 0,16  | 0,728539265 | -0,01 | 0,994486533 | 0,15  | 0,821033224 | 0,25  | 0,703831158 | -0,18 | 0,819072786 |
| Gm8075 | 0,66  | 0,631219977 | -0,15 | 0,9152526   | 0     | 0,997581017 | 0,45  | 0,729857506 | -0,05 | 0,976345724 |
| Gm8096 | 0,07  | 0,894555208 | 0,06  | 0,928134372 | -0,25 | 0,774337646 | 0,1   | 0,828717672 | 0,22  | 0,760587652 |
| Gm8098 | -0,13 | 0,778869381 | 0,05  | 0,923174593 | -0,08 | 0,927950027 | -0,04 | 0,930796637 | -0,11 | 0,866693394 |
| Gm8113 | 0,14  | 0,778869381 | 0,14  | 0,750160982 | -0,45 | 0,325181898 | 0,1   | 0,797251298 | 0,2   | 0,708898543 |
| Gm813  | -0,08 | 0,908272477 | -0,09 | 0,906201358 | 0,2   | 0,732540375 | -0,11 | 0,776545078 | -0,13 | 0,854372876 |
| Gm815  | -0,01 | 0,994910518 | -0,09 | 0,891566803 | -0,11 | 0,900347352 | 0,26  | 0,73670973  | 0,12  | 0,901132475 |

|        |       |             |       |             |       |             |       |             |       |             |
|--------|-------|-------------|-------|-------------|-------|-------------|-------|-------------|-------|-------------|
| Gm8179 | 0,22  | 0,655006949 | 0,14  | 0,902847035 | -0,05 | 0,952104131 | 0,11  | 0,886071047 | 0,39  | 0,459738349 |
| Gm8203 | -0,76 | 0,111767257 | -0,8  | 0,494859861 | 0,61  | 0,337509636 | 1,23  | 0,118319496 | 0,4   | 0,703670469 |
| Gm8221 | 0,39  | 0,673291416 | 0,37  | 0,472760732 | -0,15 | 0,814661255 | -0,33 | 0,478731976 | -0,22 | 0,791708307 |
| Gm8234 | -0,11 | 0,901563742 | 0,16  | 0,821387717 | -0,19 | 0,737241227 | -0,12 | 0,739106685 | -0,19 | 0,856323731 |
| Gm826  | 0,77  | 0,494679097 | 0,39  | 0,857503073 | -0,15 | 0,923258105 | -0,72 | 0,530723335 | 0,31  | 0,714308672 |
| Gm8267 | 0,37  | 0,565823399 | -0,06 | 0,956217122 | -0,3  | 0,615402462 | 0,27  | 0,778817721 | 0,31  | 0,677838252 |
| Gm8273 | -0,01 | 0,989017567 | 0,1   | 0,87464113  | -0,05 | 0,963725374 | -0,16 | 0,729857506 | -0,01 | 0,988516531 |
| Gm829  | 0,45  | 0,445207046 | -0,09 | 0,859339023 | -0,39 | 0,516417778 | 0,16  | 0,767568252 | 0,48  | 0,559845734 |
| Gm8298 | -0,32 | 0,612955561 | -0,15 | 0,89474699  | -0,14 | 0,830336321 | 0,26  | 0,555470395 | 0,34  | 0,654148631 |
| Gm830  | 0,05  | 0,946082673 | 0     | 0,999210601 | -0,18 | 0,800107725 | -0,83 | 0,159301552 | -0,16 | 0,858561604 |
| Gm8300 | 0,46  | 0,319471986 | -0,28 | 0,703161415 | -0,05 | 0,957152002 | 0,02  | 0,975655831 | 0,18  | 0,839969557 |
| Gm831  | -0,34 | 0,460231397 | -0,2  | 0,67317894  | 0,14  | 0,875129122 | 0,28  | 0,679990583 | 1,08  | 0,03511404  |
| Gm8327 | 0,23  | 0,753450161 | 0,01  | 0,995350053 | -0,07 | 0,938714779 | -1,12 | 0,428855564 | -0,23 | 0,919325625 |
| Gm833  | -0,1  | 0,881364664 | 0,18  | 0,792112243 | -0,29 | 0,651559391 | 0,07  | 0,932331417 | -0,01 | 0,989016067 |
| Gm8369 | -0,03 | 0,977417876 | -0,32 | 0,831580851 | -0,77 | 0,114280228 | 0,5   | 0,50456265  | 0,4   | 0,679993881 |
| Gm8378 | 0,49  | 0,376151377 | -0,32 | 0,667448986 | -0,23 | 0,598179126 | 0,25  | 0,558707204 | 0,39  | 0,450543672 |
| Gm839  | 0,09  | 0,926181408 | -0,48 | 0,560985845 | -0,03 | 0,971268254 | -0,21 | 0,819949697 | -0,49 | 0,395174487 |
| Gm8439 | 0,54  | 0,372412361 | -0,24 | 0,799259014 | 0,17  | 0,846591983 | -0,44 | 0,221765665 | -0,1  | 0,894623317 |
| Gm8465 | 0,04  | 0,939317944 | 0,01  | 0,989873399 | -0,1  | 0,872002508 | -0,14 | 0,820360895 | 0,15  | 0,875421436 |
| Gm853  | 0,35  | 0,305864243 | 0,56  | 0,281004141 | -0,19 | 0,736837174 | -0,07 | 0,931477012 | 0,29  | 0,721620565 |
| Gm8579 | 0,55  | 0,489008935 | 0,47  | 0,302028989 | -0,14 | 0,863964732 | 0,03  | 0,978196165 | 0,05  | 0,969617491 |
| Gm8633 | -0,14 | 0,822676888 | 0,13  | 0,826486917 | -0,15 | 0,888829018 | -0,47 | 0,250595614 | -0,05 | 0,968347227 |
| Gm867  | -0,39 | 0,54401985  | 0,11  | 0,878334357 | -0,4  | 0,60745966  | -0,72 | 0,117585815 | -0,19 | 0,865179476 |
| Gm8672 | 0,37  | 0,626534172 | -0,04 | 0,934294134 | -0,38 | 0,760075811 | 0,01  | 0,994279933 | 0     | 0,998748098 |
| Gm8674 | -0,1  | 0,903817676 | -0,05 | 0,977005012 | 0,13  | 0,921956183 | -0,22 | 0,591408949 | -0,16 | 0,792305774 |
| Gm8675 | -0,02 | 0,984124693 | -0,02 | 0,967833514 | -0,02 | 0,98021051  | 0,08  | 0,87811903  | -0,09 | 0,909363599 |
| Gm8692 | 0,16  | 0,69656531  | -0,05 | 0,938233008 | -0,09 | 0,908400411 | 0,21  | 0,574496617 | 0,19  | 0,752420653 |
| Gm8700 | 0,13  | 0,800851935 | -0,11 | 0,857490594 | -0,08 | 0,948637233 | 0,51  | 0,48728376  | 0,19  | 0,828078935 |
| Gm8702 | -0,08 | 0,867243066 | 0,05  | 0,938233008 | -0,02 | 0,977827235 | 0,34  | 0,266616519 | 0,33  | 0,462558109 |
| Gm8709 | 0,24  | 0,676906193 | -0,14 | 0,793603525 | 0,1   | 0,864218509 | 0,2   | 0,576371412 | 0,26  | 0,587915673 |
| Gm8773 | -0,23 | 0,62872508  | -0,33 | 0,619655121 | -0,8  | 0,195228537 | -0,15 | 0,718299331 | -0,95 | 0,207567334 |
| Gm8787 | -0,02 | 0,972701787 | -0,01 | 0,989327073 | -0,16 | 0,828667043 | 0,1   | 0,823045201 | 0,01  | 0,988084587 |
| Gm8801 | 0,2   | 0,688313545 | -0,02 | 0,989327073 | -0,13 | 0,806102885 | -0,11 | 0,907662772 | 0     | 0,996506997 |
| Gm8817 | -0,43 | 0,36240006  | 0,16  | 0,904671921 | 0,03  | 0,965775869 | 0,33  | 0,383435696 | 0,07  | 0,939448119 |
| Gm884  | -0,31 | 0,445885062 | -0,78 | 0,480808447 | 0,1   | 0,896164273 | 0,69  | 0,392145468 | 0,15  | 0,906338603 |

|        |       |             |       |             |       |             |       |             |       |             |
|--------|-------|-------------|-------|-------------|-------|-------------|-------|-------------|-------|-------------|
| Gm8883 | 0,05  | 0,934073085 | 0,09  | 0,884418706 | 0,33  | 0,454263328 | 0,2   | 0,5823626   | 0,08  | 0,922921816 |
| Gm8884 | 0,08  | 0,899550586 | 0,01  | 0,99687092  | 0,09  | 0,888377256 | 0,01  | 0,983061756 | 0,22  | 0,763277172 |
| Gm8909 | 0,43  | 0,657154622 | -0,16 | 0,89081665  | 0,02  | 0,991568687 | 0,25  | 0,715958649 | 0,16  | 0,872242794 |
| Gm8978 | -0,51 | 0,699044216 | 0     | 1           | -0,88 | 0,136784723 | 0,21  | 0,694114946 | 0,4   | 0,730289864 |
| Gm8994 | 0,09  | 0,840515514 | 0,07  | 0,886038795 | -0,27 | 0,557758269 | -0,79 | 0,064865208 | -0,48 | 0,442579293 |
| Gm8995 | 1,88  | 0,176589418 | 1,21  | 0,077698935 | -2,43 | 0,002978188 | -0,9  | 0,106060853 | 1,36  | 0,016505887 |
| Gm9    | -0,16 | 0,776721795 | 0,35  | 0,385935063 | -0,07 | 0,944468902 | -0,05 | 0,902633904 | 0,12  | 0,867946485 |
| Gm904  | -0,3  | 0,476072345 | -0,07 | 0,945143056 | 0,46  | 0,508401169 | 0,44  | 0,296855169 | 0,12  | 0,885919236 |
| Gm9047 | 0,55  | 0,607696343 | 1,23  | 0,273839061 | 0,39  | 0,61483831  | -0,77 | 0,244776528 | 0,76  | 0,380694619 |
| Gm9054 | -0,2  | 0,728516314 | 0,24  | 0,828818891 | -0,16 | 0,791940256 | 0,35  | 0,802667255 | 0,48  | 0,769180513 |
| Gm906  | 0,07  | 0,895870455 | 0,12  | 0,845231127 | -0,11 | 0,897932497 | -0,09 | 0,850124516 | 0,37  | 0,518538899 |
| Gm9079 | -0,1  | 0,81656188  | -0,07 | 0,883093763 | 0,3   | 0,484770195 | 0,42  | 0,28351096  | -0,04 | 0,968038677 |
| Gm9107 | 0,21  | 0,639346687 | 0,03  | 0,959209847 | 0,14  | 0,80874731  | 0,16  | 0,756516598 | 0,2   | 0,730298687 |
| Gm9112 | -0,23 | 0,609158244 | 0,01  | 0,999395995 | -0,06 | 0,957552304 | 0     | 0,995821993 | -0,24 | 0,720742956 |
| Gm9125 | 0,23  | 0,71347786  | 0,14  | 0,851172148 | -0,24 | 0,664931987 | 0,38  | 0,330687975 | 0,15  | 0,812549515 |
| Gm9159 | 0,28  | 0,618317596 | 0,05  | 0,946599376 | -0,11 | 0,867543859 | -0,07 | 0,884799739 | -0,08 | 0,940774655 |
| Gm9199 | -0,29 | 0,595794712 | 0,2   | 0,785153081 | -0,32 | 0,661089127 | -0,05 | 0,960916827 | 0,28  | 0,84128584  |
| Gm9222 | 0,23  | 0,703411002 | 0,18  | 0,818889977 | -0,39 | 0,676693033 | -0,37 | 0,485359351 | -0,33 | 0,638304287 |
| Gm9258 | 0,15  | 0,736503749 | 0,08  | 0,909329669 | 0     | 0,997268369 | -0,09 | 0,868828239 | -0,15 | 0,825408041 |
| Gm9271 | 0,06  | 0,958535933 | 0,08  | 0,928134372 | -0,14 | 0,850687949 | 0,4   | 0,373877062 | 0,33  | 0,59705803  |
| Gm9292 | -0,33 | 0,517998554 | -0,14 | 0,808498635 | -0,78 | 0,270473065 | 1,38  | 0,036841765 | 0,33  | 0,626176831 |
| Gm9327 | 0,23  | 0,553380985 | 0,22  | 0,656294004 | -0,08 | 0,907381049 | -0,01 | 0,984966598 | 0     | 0,999775166 |
| Gm933  | 0,37  | 0,535013574 | 0,43  | 0,459231649 | -0,1  | 0,906275304 | -0,67 | 0,095644077 | -0,32 | 0,635285358 |
| Gm9376 | -0,01 | 0,990894139 | 0,15  | 0,755498335 | 0,03  | 0,973692857 | -0,02 | 0,977418968 | 0,06  | 0,944318268 |
| Gm94   | -0,16 | 0,754969448 | -0,01 | 0,993411524 | -0,48 | 0,601532621 | 0,31  | 0,509274266 | -0,26 | 0,705549506 |
| Gm9457 | -0,01 | 0,994910518 | 0,18  | 0,738762579 | -0,13 | 0,826872735 | 0,1   | 0,855462603 | -0,19 | 0,79265811  |
| Gm9507 | 0,2   | 0,61200942  | 0,07  | 0,935329426 | -0,15 | 0,777810365 | -0,22 | 0,585862171 | -0,04 | 0,97206128  |
| Gm9513 | 0,35  | 0,562609036 | -0,08 | 0,880892852 | -0,1  | 0,860094776 | 0,05  | 0,931428395 | 0,25  | 0,724669859 |
| Gm9519 | 0,53  | 0,290080288 | 0,12  | 0,880892852 | 0,15  | 0,855523214 | 0,17  | 0,76898268  | 0,01  | 0,990695867 |
| Gm9530 | -0,1  | 0,877581958 | -0,21 | 0,801669239 | -0,2  | 0,740220539 | -0,19 | 0,61376839  | 0,02  | 0,983469081 |
| Gm9573 | -0,12 | 0,850491134 | -0,14 | 0,869352099 | 0,17  | 0,775290551 | 0,09  | 0,828328432 | -0,2  | 0,881613493 |
| Gm960  | 0,34  | 0,600518474 | 0,06  | 0,964419013 | 0,18  | 0,843617662 | 0,1   | 0,908141892 | 0,08  | 0,949032619 |
| Gm9696 | 0,1   | 0,871580532 | 0,01  | 0,994137877 | -0,12 | 0,839978338 | 0,07  | 0,865580513 | -0,02 | 0,980961333 |
| Gm9725 | 0,26  | 0,602723417 | 0,22  | 0,624712123 | -0,33 | 0,624057916 | -0,1  | 0,794368434 | 0,06  | 0,950308536 |
| Gm973  | 0,25  | 0,597519827 | -0,19 | 0,879693148 | -0,37 | 0,420043356 | 0,16  | 0,856184745 | 0,67  | 0,262663273 |

|        |       |             |       |             |       |             |       |             |       |             |
|--------|-------|-------------|-------|-------------|-------|-------------|-------|-------------|-------|-------------|
| Gm9731 | 0,02  | 0,975469067 | 0,07  | 0,902790107 | -0,07 | 0,925904075 | 0,04  | 0,925363472 | 0,06  | 0,932268703 |
| Gm9733 | 0,01  | 0,989929372 | -0,04 | 0,965147491 | 0,11  | 0,911921787 | -0,43 | 0,389081286 | -0,14 | 0,876418697 |
| Gm9734 | -0,24 | 0,552045598 | -0,07 | 0,917623085 | -0,15 | 0,789802954 | -0,11 | 0,78342209  | -0,3  | 0,623304657 |
| Gm9736 | 0,37  | 0,325367378 | 0,5   | 0,367968212 | 0,1   | 0,949912807 | -0,62 | 0,113984648 | -0,12 | 0,904836805 |
| Gm9752 | 0,06  | 0,899663802 | -0,1  | 0,849052981 | -0,16 | 0,786838878 | 0,08  | 0,84547151  | 0,1   | 0,874716101 |
| Gm9753 | 0,15  | 0,71118911  | 0     | 0,999395995 | 0,1   | 0,888377256 | 0,02  | 0,957427513 | 0,02  | 0,97683359  |
| Gm9754 | 0     | 0,998769353 | -0,17 | 0,868698739 | -0,25 | 0,70635953  | 0,81  | 0,087979099 | 0,53  | 0,442579293 |
| Gm9758 | 1,03  | 0,416909288 | 0,51  | 0,686540452 | -0,02 | 0,996102097 | -0,15 | 0,929835301 | -0,5  | 0,754511071 |
| Gm9767 | -0,3  | 0,520667704 | -0,07 | 0,932292974 | -0,3  | 0,615458955 | -0,17 | 0,758588473 | -0,16 | 0,9039404   |
| Gm9776 | -0,18 | 0,829299665 | 0,49  | 0,561035617 | -0,23 | 0,833890488 | -0,38 | 0,393025946 | 0,11  | 0,915809482 |
| Gm9789 | 0,01  | 0,984972115 | 0,26  | 0,56950098  | -0,01 | 0,996397104 | 0,02  | 0,960022369 | 0,17  | 0,830086988 |
| Gm9796 | -0,02 | 0,988536258 | -0,01 | 0,993083297 | 0,12  | 0,860094776 | -0,35 | 0,47532893  | -0,57 | 0,328817797 |
| Gm9799 | 0,49  | 0,445885062 | 0,46  | 0,630385231 | 0,07  | 0,946627221 | -0,23 | 0,774826947 | -0,58 | 0,34327492  |
| Gm9804 | 0,09  | 0,829299665 | 0,19  | 0,765325717 | 0     | 0,997598048 | 0,01  | 0,987229847 | 0,06  | 0,937593816 |
| Gm9805 | 0,02  | 0,971245076 | 0,06  | 0,904429034 | -0,08 | 0,911506558 | 0,02  | 0,970931237 | -0,09 | 0,913537201 |
| Gm9817 | 0,14  | 0,791297234 | 0,3   | 0,752804236 | -0,2  | 0,720377272 | -0,44 | 0,362347224 | -0,11 | 0,901293749 |
| Gm9821 | 0,09  | 0,866788377 | 0,03  | 0,953971373 | 0,11  | 0,860939872 | 0     | 0,994512187 | 0,07  | 0,934242963 |
| Gm9833 | -0,07 | 0,886680488 | 0,25  | 0,703041962 | -0,13 | 0,830336321 | -0,05 | 0,906288885 | -0,02 | 0,980287043 |
| Gm9837 | 0,03  | 0,963914207 | 0     | 1           | -0,27 | 0,622546805 | -0,2  | 0,689174314 | 0,02  | 0,980945466 |
| Gm9857 | -0,01 | 0,987965359 | 0     | 0,998513452 | -0,07 | 0,932866273 | 0,04  | 0,931639562 | 0     | 0,996891855 |
| Gm9866 | 0,17  | 0,766880344 | 0,4   | 0,561411813 | 0     | 0,997581017 | 0,02  | 0,980724248 | -0,06 | 0,948935854 |
| Gm9867 | 0,05  | 0,938388549 | -0,38 | 0,680709276 | 0,14  | 0,804607903 | 0,1   | 0,840665558 | 0,14  | 0,879206646 |
| Gm9869 | 0,16  | 0,734622176 | 0,04  | 0,935329426 | -0,27 | 0,720069267 | -0,25 | 0,601504444 | -0,15 | 0,836061657 |
| Gm9871 | 0,45  | 0,433699775 | -0,1  | 0,912340934 | 0,06  | 0,94040947  | 0     | 0,997549062 | -0,12 | 0,891138902 |
| Gm9873 | 0,12  | 0,782369077 | -0,04 | 0,977422441 | -0,12 | 0,87802359  | 0,44  | 0,504617071 | 0,27  | 0,61355523  |
| Gm9875 | 0,09  | 0,849867944 | -0,09 | 0,858935338 | 0,17  | 0,840187016 | 0,27  | 0,400664527 | -0,15 | 0,827032122 |
| Gm9881 | 0,19  | 0,705666778 | -0,12 | 0,884001567 | 0,13  | 0,855523214 | -0,17 | 0,759281029 | -0,03 | 0,96963338  |
| Gm9883 | -0,2  | 0,841140165 | 0     | 1           | -0,26 | 0,672766751 | 0,09  | 0,85072326  | 0,19  | 0,884640084 |
| Gm9884 | -0,07 | 0,891986094 | -0,08 | 0,85597055  | -0,2  | 0,70635953  | -0,05 | 0,908141892 | -0,02 | 0,981079016 |
| Gm9885 | -0,02 | 0,984040323 | 0,03  | 0,952327737 | -0,08 | 0,913471825 | -0,04 | 0,943143586 | -0,03 | 0,978981442 |
| Gm9887 | -0,06 | 0,917014629 | -0,07 | 0,881113709 | -0,13 | 0,848462153 | 0,08  | 0,853963723 | 0,1   | 0,904836805 |
| Gm9888 | 0,56  | 0,468111704 | 0,07  | 0,892349241 | 0,09  | 0,915558729 | 0,09  | 0,833418645 | 0,27  | 0,655956123 |
| Gm9895 | 0,07  | 0,883130741 | 0,28  | 0,710407859 | 0,15  | 0,804607903 | -0,04 | 0,920158794 | 0,07  | 0,94919447  |
| Gm9898 | -0,01 | 0,984967814 | 0,08  | 0,907167997 | 0,13  | 0,86459621  | -0,07 | 0,885417869 | -0,22 | 0,707962968 |
| Gm9899 | -0,21 | 0,635225989 | -0,07 | 0,9369583   | 0,02  | 0,986912078 | -0,17 | 0,737167484 | 0,09  | 0,916173996 |



|        |       |             |       |             |       |             |       |             |       |             |
|--------|-------|-------------|-------|-------------|-------|-------------|-------|-------------|-------|-------------|
| Gm9903 | 0,18  | 0,84900712  | 0     | 1           | 0     | 0,998030531 | -0,09 | 0,932315462 | 0,38  | 0,592460098 |
| Gm9905 | 0,07  | 0,898116888 | -0,18 | 0,698886888 | -0,06 | 0,923350407 | -0,59 | 0,274874633 | 0,13  | 0,895663184 |
| Gm9912 | 0,71  | 0,457217612 | -0,1  | 0,831404974 | -1,5  | 0,516254562 | -0,41 | 0,430977925 | 0,3   | 0,851143481 |
| Gm9915 | 0,39  | 0,448406902 | -0,05 | 0,923044405 | 0,13  | 0,835677021 | -0,72 | 0,301663719 | -0,4  | 0,587305934 |
| Gm9916 | 0,02  | 0,971963261 | 0,08  | 0,883966193 | 0,02  | 0,979791644 | 0,01  | 0,980883383 | 0,4   | 0,457363606 |
| Gm9917 | -0,35 | 0,707480624 | -0,25 | 0,849747954 | 0,32  | 0,658917141 | -1,86 | 0,009870967 | -0,06 | 0,947559952 |
| Gm9918 | 0,03  | 0,951838266 | -0,19 | 0,699281555 | 0,01  | 0,990533448 | -0,19 | 0,626690659 | -0,12 | 0,873034992 |
| Gm9919 | -0,01 | 0,990894139 | -0,02 | 0,971464245 | 0,04  | 0,946364405 | 0,02  | 0,966701307 | -0,04 | 0,964983559 |
| Gm9920 | -0,17 | 0,815000031 | 0,03  | 0,981563536 | 0     | 0,999931921 | 0,15  | 0,74940601  | 0,05  | 0,953297732 |
| Gm9921 | -0,02 | 0,969232059 | 0,13  | 0,785397253 | 0,02  | 0,982065419 | -0,12 | 0,828955037 | -0,03 | 0,974447247 |
| Gm9924 | 0,17  | 0,750334502 | 0,18  | 0,6840278   | -0,1  | 0,863043834 | -0,11 | 0,776083707 | 0,06  | 0,937446198 |
| Gm9925 | 0     | 1           | 0     | 1           | -0,1  | 0,882540073 | 0,07  | 0,855041248 | 0,12  | 0,858314976 |
| Gm9926 | 0,01  | 0,991919022 | 0,14  | 0,855394007 | 0,47  | 0,66225859  | -0,09 | 0,866760121 | 0,11  | 0,924766813 |
| Gm9928 | 0,16  | 0,83618628  | -0,24 | 0,602956592 | 0,02  | 0,985977985 | -0,12 | 0,733903742 | -0,16 | 0,801385411 |
| Gm9930 | 0,05  | 0,929231204 | -0,09 | 0,965147491 | 0,24  | 0,665727181 | 0,01  | 0,993344462 | -0,06 | 0,947437555 |
| Gm9931 | 0,07  | 0,917427199 | -0,14 | 0,732847182 | 0,3   | 0,623447121 | -0,02 | 0,972584224 | 0,06  | 0,948163009 |
| Gm9932 | -0,23 | 0,642750892 | 0,05  | 0,922192146 | -0,16 | 0,794522895 | -0,05 | 0,899335603 | -0,09 | 0,902802615 |
| Gm9933 | 0,02  | 0,977897813 | 0,15  | 0,898256272 | -0,21 | 0,747599709 | -1,05 | 0,045722004 | -0,29 | 0,744014314 |
| Gm9934 | -0,16 | 0,755100499 | -0,45 | 0,566014069 | -0,17 | 0,85952125  | 0,17  | 0,722185959 | -0,28 | 0,715928244 |
| Gm9936 | -0,31 | 0,574307926 | -0,01 | 0,997700959 | -0,08 | 0,925417014 | -0,13 | 0,777191717 | 0     | 0,999775166 |
| Gm9938 | 0,26  | 0,645057952 | 0,07  | 0,929692416 | -0,18 | 0,85593374  | 0,52  | 0,656559309 | 0,65  | 0,574285481 |
| Gm9944 | 0,08  | 0,904043614 | 0,05  | 0,958545812 | -0,28 | 0,713812841 | 0,12  | 0,798957117 | 0,16  | 0,797293554 |
| Gm9945 | 0,09  | 0,834672627 | 0,15  | 0,839789639 | 0,27  | 0,683288161 | 0,19  | 0,819949697 | 0,01  | 0,995462242 |
| Gm9946 | 0,07  | 0,891986094 | 0,01  | 0,99779557  | -0,3  | 0,467503988 | -0,01 | 0,986098825 | -0,04 | 0,966061513 |
| Gm9947 | 0,02  | 0,983402707 | 0,01  | 0,98459889  | -0,38 | 0,506222058 | -0,05 | 0,949239972 | 0,04  | 0,967807075 |
| Gm9948 | 0,11  | 0,858977038 | -0,28 | 0,829839151 | -0,25 | 0,751090942 | -0,39 | 0,664276008 | -0,34 | 0,74326943  |
| Gm9949 | -0,61 | 0,317123085 | -0,54 | 0,32258498  | -0,62 | 0,12691088  | -0,07 | 0,916687126 | -0,66 | 0,346058031 |
| Gm9951 | 0,04  | 0,943079514 | 0,02  | 0,97657246  | -0,15 | 0,80874731  | 0,16  | 0,710618613 | 0,11  | 0,885092407 |
| Gm9954 | 0,02  | 0,965116762 | 0,06  | 0,898238238 | -0,14 | 0,855320495 | 0,1   | 0,784149512 | 0,13  | 0,862749128 |
| Gm9955 | 0,01  | 0,986191362 | 0,04  | 0,932292974 | -0,08 | 0,89204807  | 0,01  | 0,984351412 | -0,03 | 0,977967676 |
| Gm9956 | -0,04 | 0,965991176 | -0,38 | 0,749674871 | 0,64  | 0,405373695 | 1,09  | 0,208003252 | 0,21  | 0,712786855 |
| Gm9958 | 0,61  | 0,321181267 | 0,03  | 0,997935558 | -0,42 | 0,758675564 | -0,69 | 0,285798207 | 0,22  | 0,78837859  |
| Gm996  | 0,02  | 0,978394906 | 0,46  | 0,459417799 | -0,12 | 0,876684089 | -0,5  | 0,211167128 | -0,06 | 0,954048928 |
| Gm9961 | -0,08 | 0,919567534 | 0,01  | 0,992175086 | 0,31  | 0,634260637 | -0,03 | 0,93808802  | -0,4  | 0,614310952 |
| Gm9962 | -0,81 | 0,277154156 | 0,54  | 0,313842139 | -0,03 | 0,974836642 | 0,1   | 0,914828446 | -0,06 | 0,970815167 |

|        |       |             |       |             |       |             |       |             |       |             |
|--------|-------|-------------|-------|-------------|-------|-------------|-------|-------------|-------|-------------|
| Gm9964 | 0,18  | 0,691658566 | 0,23  | 0,715733316 | 0,05  | 0,941254389 | 0,17  | 0,696542281 | 0,06  | 0,936246118 |
| Gm9966 | 0,09  | 0,898269435 | 0,23  | 0,729741948 | -0,25 | 0,57717258  | 0,14  | 0,740281063 | -0,13 | 0,864006331 |
| Gm9967 | -0,11 | 0,845495686 | -0,2  | 0,823246376 | 0,36  | 0,618711263 | -0,77 | 0,273752732 | -1,14 | 0,137167994 |
| Gm9968 | 0,07  | 0,90308793  | 0,14  | 0,782652703 | 0,05  | 0,94940954  | -0,19 | 0,58874149  | -0,05 | 0,95539912  |
| Gm9970 | 0,08  | 0,895871179 | -0,09 | 0,852461907 | -0,11 | 0,880574524 | 0,12  | 0,737710335 | -0,01 | 0,988374688 |
| Gm9972 | 0,01  | 0,993175772 | -0,09 | 0,894205636 | -0,14 | 0,843394396 | 0,08  | 0,87613802  | -0,14 | 0,84550602  |
| Gm9978 | 0,37  | 0,387403601 | 0,01  | 0,992017084 | -0,44 | 0,333179926 | -0,3  | 0,397216038 | -0,12 | 0,889106241 |
| Gm9979 | -0,13 | 0,750334502 | 0,47  | 0,572252572 | 0,21  | 0,756274956 | 0,07  | 0,87811903  | 0,06  | 0,953297732 |
| Gm9982 | -0,19 | 0,648730873 | 0,2   | 0,832655657 | 0,64  | 0,584456821 | 0,17  | 0,868990656 | -0,15 | 0,928724353 |
| Gm9984 | -0,11 | 0,864403632 | 0,09  | 0,853193813 | -0,25 | 0,587444031 | -0,03 | 0,948659208 | -0,06 | 0,950267521 |
| Gm9990 | 0,61  | 0,20299588  | -0,07 | 0,955204677 | -0,19 | 0,88783743  | 0,12  | 0,758588473 | 0,03  | 0,982268671 |
| Gm9991 | 0     | 0,998027251 | -0,19 | 0,703291096 | -0,47 | 0,347987056 | -0,01 | 0,992906132 | 0,15  | 0,860591136 |
| Gm9992 | -0,48 | 0,239601221 | 0,25  | 0,855632384 | -0,15 | 0,919754592 | -0,63 | 0,669860197 | -0,47 | 0,773401088 |
| Gm9994 | 0,39  | 0,540951867 | -0,04 | 0,959212941 | 0,42  | 0,798378678 | -0,79 | 0,044184887 | -0,26 | 0,70401038  |
| Gm9996 | 0,03  | 0,964358894 | 0,21  | 0,822284705 | 0,37  | 0,506787649 | -0,32 | 0,599724499 | -0,09 | 0,948935854 |
| Gm9999 | 0,07  | 0,948926586 | -0,02 | 0,982945791 | -0,16 | 0,836328669 | -0,17 | 0,682802576 | -0,05 | 0,96738578  |
| Gmcl1  | -0,33 | 0,62872508  | -0,16 | 0,728434379 | 0,29  | 0,707539555 | 0,01  | 0,981706816 | 0,15  | 0,920355527 |
| Gmcl11 | 0,03  | 0,974744119 | 0,24  | 0,827586196 | 0,39  | 0,675674731 | -0,12 | 0,883059585 | 0,03  | 0,970204035 |
| Gmcls  | -0,86 | 0,46909717  | 0,19  | 0,716668427 | 0,37  | 0,737241227 | 0,98  | 0,757184832 | 0,45  | 0,912250982 |
| Gmeb1  | 0,07  | 0,928103232 | -0,26 | 0,720626212 | 0,01  | 0,993559103 | 0,59  | 0,125209277 | -0,06 | 0,951620605 |
| Gmeb2  | -0,15 | 0,869225685 | 0,08  | 0,950492015 | 0,39  | 0,747827929 | 0,08  | 0,879005234 | 0,78  | 0,101648764 |
| Gmfb   | -0,36 | 0,449331661 | 0,07  | 0,930192503 | -0,1  | 0,934813979 | 1,44  | 0,098415856 | 0,15  | 0,85508146  |
| Gmfg   | -0,21 | 0,76339907  | -0,11 | 0,945374636 | 0,08  | 0,935168506 | -0,37 | 0,385078342 | -0,1  | 0,92577365  |
| Gmip   | 0,3   | 0,738714467 | -0,18 | 0,86198859  | 0,31  | 0,823823322 | 0,34  | 0,6447962   | 0,17  | 0,845433784 |
| Gml    | 0,05  | 0,936871609 | -0,01 | 0,998513452 | -0,21 | 0,716261194 | 0,14  | 0,729392851 | 0,25  | 0,77959286  |
| Gml2   | 0,09  | 0,926316023 | -0,33 | 0,828219939 | -0,14 | 0,903876499 | -0,29 | 0,679243757 | -0,52 | 0,601753447 |
| Gmnc   | 0,16  | 0,898572877 | 0,21  | 0,870325346 | 0,26  | 0,715497532 | 0,26  | 0,565072681 | 0,16  | 0,865258929 |
| Gmnn   | -1,22 | 0,318041432 | -1,15 | 0,279092572 | 1,66  | 0,013090358 | 1,53  | 0,253713232 | 0,16  | 0,944241841 |
| Gmppa  | -0,26 | 0,548190621 | -0,38 | 0,530207532 | 0,37  | 0,753964513 | 0,67  | 0,062574017 | -0,19 | 0,742982183 |
| Gmppb  | -0,59 | 0,279256257 | 0,2   | 0,86724871  | 0,28  | 0,856246709 | 0,4   | 0,688247215 | -0,08 | 0,956610289 |
| Gmpr   | -0,64 | 0,178589155 | -0,67 | 0,136170474 | 0,64  | 0,218714399 | 1,21  | 0,041065603 | -0,6  | 0,335291749 |
| Gmpr2  | -0,15 | 0,87094817  | -0,11 | 0,820785838 | 0,13  | 0,858606048 | 0,4   | 0,253851097 | 0,03  | 0,976743304 |
| Gmps   | -0,3  | 0,620655916 | -0,16 | 0,812202573 | 0,32  | 0,724947095 | 0,27  | 0,488775643 | -0,09 | 0,895551146 |
| Gna11  | -0,49 | 0,369334735 | -0,64 | 0,148085501 | 0,24  | 0,741623367 | -0,21 | 0,689014604 | -0,27 | 0,684349871 |
| Gna12  | -0,63 | 0,200967908 | -0,29 | 0,557225381 | 0,69  | 0,440115938 | 0,52  | 0,130637123 | -0,64 | 0,160271199 |

|       |       |             |       |             |       |             |       |             |       |             |
|-------|-------|-------------|-------|-------------|-------|-------------|-------|-------------|-------|-------------|
| Gna13 | 1,26  | 0,04197452  | 1,31  | 0,084290601 | -0,73 | 0,313065218 | 1,81  | 0,022717339 | 1,13  | 0,097686358 |
| Gna14 | 0,39  | 0,662854107 | 0,54  | 0,802788292 | -0,07 | 0,908400411 | 0,62  | 0,552672695 | -0,49 | 0,356938897 |
| Gna15 | 0,47  | 0,542068385 | 0,38  | 0,340027165 | 0,76  | 0,420524512 | -0,78 | 0,273505119 | -0,27 | 0,838679773 |
| Gnai1 | -0,98 | 0,180862229 | 0     | 1           | 0,41  | 0,598517413 | 0,03  | 0,983166423 | -0,31 | 0,844265172 |
| Gnai2 | -0,33 | 0,357553901 | -0,17 | 0,676123799 | 0,19  | 0,737325159 | 0,31  | 0,319122891 | -0,19 | 0,734274054 |
| Gnai3 | 0,06  | 0,925148331 | 0,19  | 0,673817783 | 0,54  | 0,488218852 | 0,04  | 0,945422049 | 0,1   | 0,898448235 |
| Gnal  | 0,41  | 0,636493135 | -0,44 | 0,701043773 | 0,29  | 0,706714392 | 0,1   | 0,805452009 | -0,15 | 0,845218636 |
| Gnao1 | -0,07 | 0,958821517 | -0,11 | 0,945374636 | 0,3   | 0,808065828 | -1,12 | 0,259200755 | -0,08 | 0,969681536 |
| Gnaq  | 0,2   | 0,664456582 | -0,07 | 0,921821409 | 0,26  | 0,702677589 | -0,1  | 0,871773288 | 0,14  | 0,845218636 |
| Gnas  | -0,79 | 0,104092085 | -0,36 | 0,459231649 | -0,28 | 0,669548016 | 0,29  | 0,564245683 | -0,01 | 0,987935971 |
| Gnat1 | 0,08  | 0,925510521 | 0,48  | 0,724005117 | 0,32  | 0,683975246 | -1,01 | 0,339455217 | -0,79 | 0,486720916 |
| Gnat2 | -0,54 | 0,376305612 | -0,39 | 0,630839743 | 0,01  | 0,990836784 | -0,58 | 0,81096279  | -0,72 | 0,753273319 |
| Gnat3 | 0,57  | 0,428912147 | 0,11  | 0,958545812 | -0,31 | 0,712697139 | 0,02  | 0,968980728 | 0,3   | 0,74624632  |
| Gnaz  | -0,14 | 0,870052902 | 0,19  | 0,792112243 | -0,26 | 0,723002297 | -0,91 | 0,23151466  | -0,3  | 0,791800359 |
| Gnb1  | -0,24 | 0,510164315 | -0,33 | 0,385935063 | 0,16  | 0,771112385 | -0,06 | 0,87148686  | -0,15 | 0,802268258 |
| Gnb11 | -0,95 | 0,093379419 | -0,7  | 0,232674405 | 0,57  | 0,326054745 | 0,19  | 0,910669797 | -0,95 | 0,463963526 |
| Gnb2  | -0,37 | 0,322835282 | -0,3  | 0,581950526 | 0,62  | 0,443341184 | 0,13  | 0,739831108 | -0,3  | 0,579652851 |
| Gnb3  | 0,36  | 0,59108421  | 1     | 0,244369994 | 0     | 0,997446569 | -0,71 | 0,246648596 | -0,17 | 0,871038748 |
| Gnb4  | -0,13 | 0,778869381 | 0,1   | 0,884434898 | -0,12 | 0,909233941 | 1,02  | 0,054297321 | 1,06  | 0,05100134  |
| Gnb5  | -1,26 | 0,074890017 | -1,18 | 0,205273528 | -0,09 | 0,948085051 | 0,28  | 0,734587328 | -0,53 | 0,452989679 |
| Gne   | -0,51 | 0,218933879 | -0,61 | 0,304034247 | -0,23 | 0,777417583 | -0,66 | 0,151431819 | -0,52 | 0,335679372 |
| Gng10 | -0,32 | 0,562096428 | -0,31 | 0,671319666 | 0,42  | 0,379638471 | 0,19  | 0,636330965 | -0,87 | 0,274394155 |
| Gng11 | -0,28 | 0,53888573  | -0,31 | 0,487771533 | 0,3   | 0,725191296 | 0,18  | 0,690442683 | -0,36 | 0,492374471 |
| Gng12 | 0,31  | 0,343668549 | 0,45  | 0,236012745 | -0,72 | 0,09059546  | 0,43  | 0,204370449 | 0,48  | 0,295762635 |
| Gng13 | -0,29 | 0,631688937 | 0,3   | 0,765180904 | 0,02  | 0,986800862 | 0,14  | 0,837461612 | 0,22  | 0,765327693 |
| Gng2  | 0,04  | 0,95538722  | -0,08 | 0,914993156 | 0,12  | 0,90672161  | 0,24  | 0,76520917  | -0,22 | 0,830813323 |
| Gng3  | 0,32  | 0,592731637 | 0,13  | 0,822885205 | -0,22 | 0,638965268 | -0,14 | 0,802239788 | 0,21  | 0,734750869 |
| Gng4  | -0,07 | 0,913425276 | -0,12 | 0,924194307 | -0,13 | 0,86892661  | 0,28  | 0,632606942 | 0,05  | 0,957620856 |
| Gng5  | 0,53  | 0,328303644 | -0,34 | 0,428913843 | 0,21  | 0,689847701 | 1,09  | 0,017791354 | 0,15  | 0,860591136 |
| Gng7  | 0,17  | 0,826457489 | -0,22 | 0,726556693 | 0,11  | 0,907353858 | -0,36 | 0,438313935 | -0,31 | 0,620783704 |
| Gng8  | 0,1   | 0,881155133 | -0,12 | 0,898238238 | -0,31 | 0,646861835 | 0,58  | 0,415968391 | 0,03  | 0,981913783 |
| Gngt1 | 0,01  | 0,996210327 | 0,06  | 0,937377463 | -0,28 | 0,665554804 | 0,09  | 0,885417869 | -0,12 | 0,943835199 |
| Gngt2 | 0,33  | 0,486792758 | -0,14 | 0,784841983 | -0,22 | 0,865318296 | 0,15  | 0,800863276 | -0,21 | 0,801385411 |
| Gnl1  | 0,11  | 0,886891037 | 0,14  | 0,818871477 | 0,13  | 0,879141223 | 0,82  | 0,04404487  | 0,48  | 0,338653241 |
| Gnl2  | 0,24  | 0,691658566 | 0,47  | 0,310525594 | 0,11  | 0,885042765 | 0,22  | 0,547396551 | 0,31  | 0,576777161 |

|         |       |             |       |             |       |             |       |             |       |             |
|---------|-------|-------------|-------|-------------|-------|-------------|-------|-------------|-------|-------------|
| Gnl3    | -0,32 | 0,503646882 | -0,15 | 0,842885677 | 0,35  | 0,564288452 | 0,86  | 0,109744273 | 0,91  | 0,101597536 |
| Gnl3l   | -0,6  | 0,301230942 | -0,32 | 0,557880587 | 0,42  | 0,614229761 | 0,35  | 0,601334805 | 0,27  | 0,738260196 |
| Gnmt    | 0,49  | 0,48807403  | 0,22  | 0,683761476 | -0,13 | 0,930857987 | -0,53 | 0,118257187 | -0,33 | 0,581626555 |
| Gnpat   | -0,32 | 0,571059837 | -0,09 | 0,88928164  | 0,32  | 0,85952125  | 0,28  | 0,583447596 | 0,1   | 0,91314596  |
| Gnpda1  | -0,28 | 0,857585372 | -0,2  | 0,820806352 | 1,02  | 0,430424599 | 1,36  | 0,025699992 | -0,91 | 0,314952193 |
| Gnpda2  | 0,07  | 0,914090929 | -0,36 | 0,531187764 | 0,47  | 0,584463665 | 0,86  | 0,204120985 | 0     | 0,997929588 |
| Gnpnat1 | -0,23 | 0,778723429 | -0,02 | 0,989036108 | 0,55  | 0,314535803 | 0,57  | 0,245300616 | 0,12  | 0,890957032 |
| Gnptab  | -0,68 | 0,297096518 | -0,73 | 0,303369718 | 0,37  | 0,720069267 | -0,2  | 0,729857506 | -0,14 | 0,84970727  |
| Gnptg   | 0,41  | 0,362152388 | 0,29  | 0,509013394 | -0,14 | 0,864411302 | -0,54 | 0,264298399 | 0,28  | 0,677222415 |
| Gnrh1   | 0,83  | 0,214430522 | 0,33  | 0,781665479 | -0,16 | 0,946627221 | 0,07  | 0,889143988 | 0,49  | 0,613970786 |
| Gnrhr   | 0,17  | 0,839658745 | -0,13 | 0,817110093 | -0,1  | 0,909963525 | 0,39  | 0,280091537 | 0,36  | 0,569157242 |
| Gns     | 0,77  | 0,194005514 | 0,56  | 0,261452339 | -0,21 | 0,807926482 | -0,18 | 0,67240427  | -0,24 | 0,711133698 |
| Golga1  | -0,51 | 0,222754455 | -0,58 | 0,31460204  | 0,75  | 0,201202557 | 0,15  | 0,802380914 | -0,1  | 0,937446198 |
| Golga2  | -0,17 | 0,80135729  | -0,02 | 0,994137877 | 0,18  | 0,78984366  | 0,02  | 0,984136649 | -0,26 | 0,765809384 |
| Golga3  | -0,48 | 0,356646108 | -0,23 | 0,847885195 | 0,39  | 0,671012215 | 0,53  | 0,144366975 | 0,03  | 0,970576724 |
| Golga4  | 0,33  | 0,670542104 | 0,05  | 0,930849936 | -0,52 | 0,453179597 | -0,41 | 0,406444051 | -0,08 | 0,938191016 |
| Golga5  | 0,14  | 0,776721795 | -0,19 | 0,852461907 | 0     | 0,997779809 | 0,39  | 0,418017801 | -0,11 | 0,910212022 |
| Golga7  | -0,09 | 0,84041722  | 0,07  | 0,877840602 | -0,13 | 0,904057901 | 0,44  | 0,219519453 | -0,21 | 0,707081609 |
| Golga7b | -0,35 | 0,832696131 | -0,56 | 0,627107686 | -0,58 | 0,557023998 | 0,22  | 0,72883509  | -0,24 | 0,865258929 |
| Golgb1  | 0,11  | 0,856118781 | -0,16 | 0,828818891 | 0,01  | 0,99147958  | 0,37  | 0,329610354 | -0,05 | 0,949102947 |
| Golim4  | -0,66 | 0,156998083 | -0,74 | 0,19876663  | 0,61  | 0,379638471 | -0,33 | 0,601862735 | -0,04 | 0,973382116 |
| Golm1   | -0,96 | 0,129226243 | -0,76 | 0,104457339 | 0,47  | 0,440593105 | 0,61  | 0,303116085 | -0,8  | 0,207567334 |
| Golph3  | -0,03 | 0,954163725 | 0,23  | 0,718769238 | 0,46  | 0,432229079 | 0,24  | 0,694362194 | 0,1   | 0,919325625 |
| Golph3l | -0,4  | 0,513822814 | 0,08  | 0,912137323 | -0,74 | 0,409611548 | -0,07 | 0,981644651 | 0,19  | 0,950677327 |
| Golt1a  | -0,08 | 0,921306075 | -0,31 | 0,474106654 | 0,27  | 0,777918093 | 0,4   | 0,270546358 | 0,11  | 0,921063662 |
| Golt1b  | -0,23 | 0,714127381 | -0,62 | 0,426168855 | 1,05  | 0,240865131 | 1,56  | 0,027183982 | 0,14  | 0,910829332 |
| Gon4l   | -0,16 | 0,741332778 | 0,34  | 0,640299669 | -0,17 | 0,863964732 | -0,5  | 0,123976493 | -0,8  | 0,157238782 |
| Gopc    | -0,45 | 0,511932173 | 0,3   | 0,611052267 | 0,25  | 0,816883729 | -0,01 | 0,994638711 | 0,06  | 0,953297732 |
| Gorab   | -0,4  | 0,741656732 | 0,03  | 0,985172298 | 0,26  | 0,8037588   | 0,39  | 0,724507368 | 0,69  | 0,54819971  |
| Gorasp1 | 0,01  | 0,993728727 | -0,55 | 0,456156525 | -0,18 | 0,779428    | 0,09  | 0,830668785 | -0,92 | 0,08722862  |
| Gorasp2 | -0,36 | 0,36631183  | -0,57 | 0,313335899 | 0,45  | 0,493914485 | 0,98  | 0,021416936 | -0,08 | 0,911506374 |
| Gosr1   | 0,44  | 0,382845839 | 0,26  | 0,697354745 | 0,21  | 0,661820464 | -0,07 | 0,928129133 | 0,7   | 0,223330086 |
| Gosr2   | 0,01  | 0,990294963 | 0,23  | 0,7082525   | 0,13  | 0,864364089 | -0,23 | 0,522511755 | -0,05 | 0,954657649 |
| Got1    | -0,22 | 0,747211305 | -0,13 | 0,811280211 | 0,88  | 0,325974926 | 0,61  | 0,221385829 | 1,39  | 0,050495377 |
| Got1l1  | 0,65  | 0,351483867 | 0,62  | 0,367968212 | -0,06 | 0,950846671 | -0,06 | 0,955119589 | 0,36  | 0,714465859 |

|          |       |             |       |             |       |             |       |             |       |             |
|----------|-------|-------------|-------|-------------|-------|-------------|-------|-------------|-------|-------------|
| Got2     | -0,54 | 0,388432897 | -0,3  | 0,550465164 | 0,42  | 0,373207762 | 0,29  | 0,494392613 | -0,15 | 0,825680274 |
| Gp1ba    | 0,32  | 0,56461489  | -0,31 | 0,745921616 | -0,14 | 0,812715164 | -0,13 | 0,849351031 | 0,04  | 0,975119065 |
| Gp1bb    | 0,22  | 0,772855197 | 0,2   | 0,809683705 | 0,14  | 0,8785896   | -0,15 | 0,881998283 | -0,04 | 0,980945466 |
| Gp2      | -0,1  | 0,89081819  | 0,1   | 0,907403936 | -0,28 | 0,755802952 | 0     | 0,997932303 | 0,13  | 0,860591136 |
| Gp5      | -0,05 | 0,964272364 | 0,33  | 0,66315423  | 0,63  | 0,552331473 | -0,41 | 0,606522367 | 0,25  | 0,85967058  |
| Gp6      | 0,12  | 0,90651164  | 0,91  | 0,107449087 | -0,34 | 0,700931261 | 0,1   | 0,935076398 | 0,15  | 0,912890826 |
| Gp9      | 0     | 0,999700495 | 0,09  | 0,90781211  | 0,08  | 0,932577939 | 0,21  | 0,696843539 | 0,23  | 0,745574572 |
| Gpa33    | -0,09 | 0,905410816 | -0,24 | 0,677128722 | 0,3   | 0,795128728 | 0,18  | 0,784787747 | -0,38 | 0,80155635  |
| Gpaa1    | -0,45 | 0,455714377 | -0,25 | 0,568282579 | 0,22  | 0,820823892 | 0,08  | 0,854971757 | -0,18 | 0,81954505  |
| Gpalpp1  | -0,05 | 0,949362206 | 0,27  | 0,657157409 | 0     | 0,998080686 | 0,1   | 0,862217405 | -0,21 | 0,763240477 |
| Gpam     | -1,19 | 0,237911715 | -0,59 | 0,400515868 | -0,05 | 0,976092199 | 0,48  | 0,328813804 | -0,55 | 0,391334808 |
| Gpank1   | 0,08  | 0,892195063 | -0,13 | 0,84786877  | -0,25 | 0,735003288 | 0,21  | 0,726953267 | 0,05  | 0,96888535  |
| Gpat2    | 0,38  | 0,520948125 | 0,3   | 0,522592783 | -0,19 | 0,80210446  | 0,34  | 0,467580023 | 0,01  | 0,993903627 |
| Gpat4    | -0,24 | 0,738714467 | -0,19 | 0,746426055 | -0,03 | 0,975771514 | 0,75  | 0,10753942  | 0,23  | 0,720742956 |
| Gpatch1  | -0,78 | 0,343457563 | 0,12  | 0,824113739 | 0,13  | 0,894229514 | -0,25 | 0,690664654 | -0,08 | 0,939448119 |
| Gpatch11 | 0,29  | 0,597297093 | 0,16  | 0,858935338 | 0,64  | 0,19907753  | -0,46 | 0,499022095 | -0,01 | 0,994821569 |
| Gpatch2  | -0,1  | 0,957273909 | -0,09 | 0,88928164  | -0,24 | 0,867140012 | 0,12  | 0,85836861  | -0,02 | 0,983613958 |
| Gpatch2l | 0,06  | 0,96263856  | -0,08 | 0,916496897 | 0,19  | 0,784072599 | -0,37 | 0,598657551 | -0,59 | 0,457727631 |
| Gpatch3  | 0,15  | 0,865689677 | 0,09  | 0,932628106 | -0,37 | 0,552970779 | -0,32 | 0,529746075 | -0,19 | 0,799638391 |
| Gpatch4  | -0,42 | 0,493929    | -0,31 | 0,680709276 | 0,41  | 0,548043774 | 0,98  | 0,107378697 | -0,2  | 0,784792929 |
| Gpatch8  | 0,05  | 0,965116762 | 0,36  | 0,415037534 | 0,4   | 0,475629395 | -0,39 | 0,280843942 | -0,21 | 0,757147567 |
| Gpbar1   | 0,25  | 0,546545311 | -0,15 | 0,882847123 | 0,02  | 0,987563007 | -0,11 | 0,893846627 | 0,04  | 0,969617491 |
| Gbbp1    | 0,29  | 0,553849378 | 0,47  | 0,286908359 | 0,41  | 0,54553349  | 0     | 0,997598211 | 0,49  | 0,3223162   |
| Gbbp1l1  | 0,23  | 0,620468351 | 0,16  | 0,74245372  | 0,42  | 0,495129177 | -0,43 | 0,250595614 | -0,14 | 0,861186507 |
| Gpc1     | 0,29  | 0,816316218 | -0,22 | 0,716668427 | 0,58  | 0,390139878 | 0,72  | 0,289958384 | 0,3   | 0,716229308 |
| Gpc2     | -0,25 | 0,684541418 | -0,57 | 0,466784571 | 0,45  | 0,538341146 | 0,53  | 0,513261302 | 0,19  | 0,868037689 |
| Gpc3     | 0,06  | 0,936611783 | 0,16  | 0,907186434 | 0,18  | 0,702677589 | -0,43 | 0,383221502 | -0,46 | 0,62978577  |
| Gpc4     | -0,59 | 0,513822814 | -0,36 | 0,763005394 | -0,55 | 0,421258302 | -0,23 | 0,628879523 | -0,84 | 0,513714397 |
| Gpc5     | 0,43  | 0,551645433 | 0,18  | 0,910688765 | 0,11  | 0,917108186 | -0,41 | 0,614020247 | -0,12 | 0,90813354  |
| Gpc6     | 0,05  | 0,955394263 | 0,37  | 0,53500766  | 0,15  | 0,823823322 | -2,01 | 0,041457575 | -0,94 | 0,223294439 |
| Gpcpd1   | -0,52 | 0,59710379  | -0,4  | 0,564925106 | 0,08  | 0,957327097 | 0,05  | 0,967866794 | 0,26  | 0,825862506 |
| Gpd1     | -0,48 | 0,362306469 | 0,54  | 0,872982041 | -0,09 | 0,898935616 | -1,21 | 0,486817461 | -0,41 | 0,673945231 |
| Gpd1l    | -0,67 | 0,174486739 | -0,53 | 0,327968427 | 0,42  | 0,57717258  | -0,67 | 0,412444444 | -0,59 | 0,630523551 |
| Gpd2     | -0,29 | 0,728739942 | -0,15 | 0,911024505 | 0,72  | 0,577789393 | -1,03 | 0,177783552 | -0,34 | 0,766559546 |
| Gper1    | 0,28  | 0,76050225  | -0,6  | 0,614233457 | -0,29 | 0,700433004 | -0,84 | 0,377090589 | -0,62 | 0,338653241 |

|            |       |             |       |             |       |             |       |             |       |             |
|------------|-------|-------------|-------|-------------|-------|-------------|-------|-------------|-------|-------------|
| Gpha2      | 0,67  | 0,162142449 | 0,67  | 0,345409693 | 0,13  | 0,907455942 | -0,14 | 0,740759719 | 0,74  | 0,132625512 |
| Gphb5      | 0,23  | 0,645863119 | 0,4   | 0,518494408 | 0,12  | 0,845651772 | -0,12 | 0,899197443 | 0,26  | 0,735152891 |
| Gphn       | -0,14 | 0,932110766 | 0,68  | 0,219055424 | -0,52 | 0,560191012 | -1    | 0,056207489 | 0,42  | 0,46348763  |
| Gpi1       | -0,25 | 0,659683005 | 0,05  | 0,927205716 | 0,35  | 0,544756897 | 0,41  | 0,280334373 | -0,54 | 0,395499484 |
| Gpihbp1    | 0,1   | 0,828685491 | -0,19 | 0,676064277 | 0,01  | 0,993379272 | 0,61  | 0,124142377 | -0,66 | 0,266832581 |
| Gpkow      | -0,36 | 0,474293292 | 0,32  | 0,455294676 | 0,3   | 0,602775092 | -0,05 | 0,931477012 | 0,02  | 0,985371176 |
| Gpld1      | -0,16 | 0,782826998 | -0,05 | 0,968460622 | -0,23 | 0,755802952 | 0,14  | 0,889830648 | -0,12 | 0,928889377 |
| Gpm6a      | 0,83  | 0,317524117 | -0,25 | 0,831404974 | 0,06  | 0,960275507 | -4,37 | 0,004327479 | 0,25  | 0,80155635  |
| Gpm6b      | -0,29 | 0,808947569 | 0,07  | 0,912137323 | 0,18  | 0,809062815 | -0,6  | 0,259714992 | -0,21 | 0,793839436 |
| Gpn1       | -0,5  | 0,262000203 | -0,44 | 0,594815951 | -0,1  | 0,950772658 | 0,56  | 0,493856127 | 0,33  | 0,728867732 |
| Gpn2       | -0,04 | 0,968500829 | -0,15 | 0,740517638 | 0,32  | 0,683917899 | -0,01 | 0,993869623 | -0,38 | 0,511962622 |
| Gpn3       | -0,02 | 0,991919022 | -0,44 | 0,459231649 | 0,6   | 0,649946954 | -0,53 | 0,479105416 | -0,65 | 0,559794251 |
| Gpnmb      | 1,05  | 0,319187267 | 0,21  | 0,789051952 | -1,15 | 0,321560439 | -0,16 | 0,730274025 | -0,19 | 0,778035199 |
| Gpr1       | -0,45 | 0,440266426 | -0,39 | 0,533966654 | 0,48  | 0,746232547 | -0,33 | 0,536822607 | -0,72 | 0,432621109 |
| Gpr101     | 0,02  | 0,98456417  | 0,41  | 0,275854898 | -0,01 | 0,996111139 | -0,03 | 0,972584224 | 0,05  | 0,961303869 |
| Gpr107     | 0,07  | 0,956152533 | -0,26 | 0,552143156 | 0,61  | 0,209201872 | 0,84  | 0,363119525 | 0,13  | 0,935747791 |
| Gpr108     | 0,29  | 0,607696343 | 0,08  | 0,869495185 | -0,3  | 0,599364835 | -0,28 | 0,353797054 | -0,04 | 0,961406182 |
| Gpr119     | 0,1   | 0,840882072 | -0,2  | 0,754780521 | 0,02  | 0,987504853 | 0,19  | 0,645842474 | 0,07  | 0,937558003 |
| Gpr12      | 0,11  | 0,820023436 | -0,37 | 0,627386884 | -0,21 | 0,709846532 | 0,13  | 0,749554449 | 0     | 0,997106233 |
| Gpr132     | -0,03 | 0,966775766 | 0,08  | 0,915265253 | -0,28 | 0,647707415 | -0,06 | 0,94835703  | 0,05  | 0,955276498 |
| Gpr135     | -0,02 | 0,967892992 | -0,01 | 0,992017084 | 0,01  | 0,991562229 | 0,16  | 0,713527529 | 0,01  | 0,98855352  |
| Gpr137     | 0,11  | 0,840909921 | 0,35  | 0,585338908 | -0,03 | 0,979423868 | -0,11 | 0,845813504 | 0,13  | 0,865258929 |
| Gpr137b-ps | 0,12  | 0,919567534 | -0,27 | 0,804993507 | 0,03  | 0,976092199 | -0,87 | 0,079054919 | 0,09  | 0,939930189 |
| Gpr137c    | 0,14  | 0,756141549 | -0,82 | 0,109267475 | 0,05  | 0,956894731 | 0,43  | 0,392014916 | -0,38 | 0,554975763 |
| Gpr139     | -0,09 | 0,858748956 | 0,05  | 0,941811651 | -0,13 | 0,821229302 | -0,17 | 0,663160203 | -0,28 | 0,662801092 |
| Gpr141     | 0,12  | 0,855264133 | -0,08 | 0,855632384 | -0,21 | 0,779486228 | 0,01  | 0,986287953 | -0,11 | 0,884244347 |
| Gpr142     | -0,04 | 0,963378584 | -0,36 | 0,615311543 | -0,17 | 0,78984366  | 0,12  | 0,733247988 | -0,12 | 0,86809582  |
| Gpr143     | -0,29 | 0,493929    | 0,05  | 0,970832543 | -0,18 | 0,804910036 | -0,46 | 0,265568899 | 0,29  | 0,728483022 |
| Gpr146     | 0,81  | 0,247254947 | 0,63  | 0,325242663 | -0,14 | 0,894229514 | -0,98 | 0,245606948 | 0,7   | 0,440709829 |
| Gpr149     | -0,04 | 0,963914207 | -0,35 | 0,47447136  | -0,04 | 0,966965904 | 0,24  | 0,661219211 | -0,16 | 0,84701421  |
| Gpr15      | 0,21  | 0,55640978  | 0,04  | 0,932818378 | -0,11 | 0,868054401 | 0,16  | 0,705916431 | 0     | 0,998444219 |
| Gpr150     | 0,16  | 0,840909921 | 0,07  | 0,898701949 | 0     | 0,999931921 | -0,3  | 0,832176117 | 0,05  | 0,976743304 |
| Gpr151     | 0,12  | 0,829299665 | 0     | 1           | -0,48 | 0,51127708  | 0,18  | 0,665933714 | -0,38 | 0,550083777 |
| Gpr152     | 0,02  | 0,976237719 | 0,17  | 0,904671921 | -0,11 | 0,90228001  | 0,29  | 0,453588169 | 0,02  | 0,978981442 |
| Gpr153     | 0,52  | 0,504081209 | 0,2   | 0,624712123 | -0,16 | 0,852758695 | 0,45  | 0,525253689 | 0,15  | 0,873731593 |

|         |       |             |       |             |       |             |       |             |       |             |
|---------|-------|-------------|-------|-------------|-------|-------------|-------|-------------|-------|-------------|
| Gpr155  | 0,75  | 0,530264899 | -0,03 | 0,989985353 | -0,82 | 0,436827113 | -0,38 | 0,911958998 | 0,57  | 0,868583076 |
| Gpr156  | -0,08 | 0,903268859 | 0,07  | 0,937377463 | -0,09 | 0,922318683 | -0,32 | 0,454242469 | -0,11 | 0,898802672 |
| Gpr157  | -0,03 | 0,970134229 | 0,01  | 0,996259587 | -0,42 | 0,71593256  | -0,09 | 0,884352208 | 0,36  | 0,59705803  |
| Gpr158  | -0,56 | 0,30612081  | 0,18  | 0,809884595 | -0,03 | 0,971268254 | 0,02  | 0,977322993 | 0,27  | 0,673145862 |
| Gpr160  | 0,64  | 0,474777426 | 0     | 1           | -0,06 | 0,969844657 | -1,03 | 0,138488499 | -0,04 | 0,979392852 |
| Gpr161  | -0,16 | 0,883923631 | 0,09  | 0,943915456 | 0,08  | 0,96080423  | -0,64 | 0,594574312 | -1,01 | 0,396861658 |
| Gpr162  | -0,13 | 0,816710776 | 0,39  | 0,641792237 | -0,27 | 0,832947491 | -0,08 | 0,892406519 | 0,08  | 0,913553402 |
| Gpr165  | -0,14 | 0,784951771 | 0,09  | 0,887752277 | 0,07  | 0,930223445 | -0,19 | 0,789616492 | 0,25  | 0,727744679 |
| Gpr17   | 0,29  | 0,61209342  | 0,05  | 0,948314657 | 0,12  | 0,837221461 | 0,28  | 0,468239117 | -0,11 | 0,885872093 |
| Gpr171  | 0,63  | 0,491650365 | 0,35  | 0,708684603 | -0,7  | 0,18966948  | -0,29 | 0,768036061 | -0,09 | 0,917710291 |
| Gpr173  | 0,13  | 0,921898929 | 0,4   | 0,467412874 | -0,08 | 0,880706627 | 0,02  | 0,987621068 | 0,36  | 0,692665626 |
| Gpr174  | 0,37  | 0,414844288 | -0,18 | 0,792086001 | -0,14 | 0,811669636 | 0,03  | 0,967866794 | -0,26 | 0,634515023 |
| Gpr176  | 0,15  | 0,869565514 | -0,14 | 0,805467498 | 0,02  | 0,982241391 | 0,27  | 0,578867273 | -0,13 | 0,883738739 |
| Gpr179  | 0,27  | 0,710452116 | 0,15  | 0,928134372 | 0,14  | 0,863701276 | 0,09  | 0,908141892 | 0,08  | 0,954657649 |
| Gpr18   | 0,91  | 0,188872409 | 0,34  | 0,453958512 | -1,04 | 0,209534486 | -0,01 | 0,981332523 | 0,09  | 0,918170806 |
| Gpr180  | -0,15 | 0,767083571 | -0,19 | 0,771042534 | 0,29  | 0,729446768 | 0,73  | 0,097710906 | -0,53 | 0,33353181  |
| Gpr182  | -0,55 | 0,167126406 | -0,5  | 0,532983509 | -0,68 | 0,324321658 | -3,18 | 0,005494206 | -0,08 | 0,951176395 |
| Gpr183  | -0,35 | 0,600313897 | -0,12 | 0,829238025 | 0,01  | 0,993379272 | 0,3   | 0,470051531 | 0,04  | 0,975441362 |
| Gpr19   | 0,78  | 0,247531815 | 0,07  | 0,937458837 | 0,34  | 0,690061606 | 0     | 1           | 0,48  | 0,556757903 |
| Gpr20   | -0,1  | 0,869565514 | -0,35 | 0,505731706 | -0,04 | 0,951210125 | -0,71 | 0,133287397 | -0,93 | 0,26709017  |
| Gpr21   | -0,16 | 0,91048699  | 0,28  | 0,764406705 | 0,88  | 0,43071571  | -0,38 | 0,665234661 | -0,09 | 0,950965682 |
| Gpr22   | 0,23  | 0,687662951 | 0,08  | 0,926157704 | -0,01 | 0,993379272 | -0,2  | 0,771248309 | -0,16 | 0,880931325 |
| Gpr25   | 0,25  | 0,657124524 | -0,03 | 0,96497149  | -0,15 | 0,82104737  | 0,02  | 0,968266606 | -0,27 | 0,675958562 |
| Gpr26   | 0,01  | 0,98967038  | -0,55 | 0,49125334  | 0,06  | 0,947460329 | 0,62  | 0,14771954  | 0,35  | 0,555315018 |
| Gpr27   | 0,16  | 0,704023324 | 0,01  | 0,982786635 | -0,21 | 0,696939569 | 0,05  | 0,916072825 | -0,27 | 0,616321633 |
| Gpr3    | 0,15  | 0,753576419 | -0,39 | 0,628779499 | 0,33  | 0,557023998 | 0,48  | 0,328502619 | 0,33  | 0,765438999 |
| Gpr31b  | -0,23 | 0,642618049 | 0,03  | 0,981427327 | 0,15  | 0,86935713  | -0,14 | 0,90213506  | -0,67 | 0,478324516 |
| Gpr33   | 0,1   | 0,840909921 | 0,4   | 0,582478031 | -0,26 | 0,632347904 | -0,28 | 0,501758967 | 0,22  | 0,701728076 |
| Gpr34   | -0,23 | 0,701086418 | 0,19  | 0,793603525 | -0,26 | 0,786016454 | 0,35  | 0,841644929 | 0,49  | 0,799495162 |
| Gpr35   | 0,62  | 0,343046022 | -0,31 | 0,700903976 | 0,2   | 0,834985569 | 0,03  | 0,976330091 | -0,89 | 0,060191534 |
| Gpr37   | -0,35 | 0,70137787  | -0,5  | 0,701043773 | -0,2  | 0,831275588 | -0,19 | 0,742739435 | -0,17 | 0,871038748 |
| Gpr37l1 | -0,36 | 0,593346967 | 0,23  | 0,691825029 | -0,03 | 0,985675844 | -0,11 | 0,788850877 | -0,16 | 0,799510708 |
| Gpr39   | -0,42 | 0,44496636  | 0,1   | 0,928402591 | 1,03  | 0,33075776  | -0,08 | 0,900529161 | 0,62  | 0,328821044 |
| Gpr4    | -0,02 | 0,972682121 | -0,13 | 0,809836015 | -0,14 | 0,795445046 | 0,55  | 0,311639141 | 0,1   | 0,922921816 |
| Gpr45   | -0,35 | 0,654811017 | -0,01 | 0,992383215 | -0,35 | 0,603407852 | 0,13  | 0,789516436 | 0,42  | 0,74624632  |

|         |       |             |       |             |       |             |       |             |       |             |
|---------|-------|-------------|-------|-------------|-------|-------------|-------|-------------|-------|-------------|
| Gpr50   | 0,19  | 0,869565514 | 0,43  | 0,779384655 | 0,4   | 0,483761569 | -0,36 | 0,601868312 | -0,19 | 0,847424577 |
| Gpr52   | 0,06  | 0,936139343 | -0,05 | 0,958545812 | -0,2  | 0,863833849 | 0,05  | 0,916072825 | 0,51  | 0,49197391  |
| Gpr55   | 0,11  | 0,830031987 | -0,49 | 0,228451204 | -0,16 | 0,794194778 | 0,14  | 0,837974367 | -0,35 | 0,59705803  |
| Gpr6    | -0,03 | 0,963003179 | 0,11  | 0,882847123 | 0,15  | 0,840730961 | 0,23  | 0,766983048 | 0,01  | 0,992406971 |
| Gpr61   | 0,28  | 0,47606703  | -0,21 | 0,669154864 | -0,28 | 0,707571856 | 0,45  | 0,235551671 | -0,03 | 0,97425848  |
| Gpr62   | 0,03  | 0,969417036 | -0,09 | 0,877840602 | -0,29 | 0,67074385  | 0,1   | 0,80027497  | 0,09  | 0,912478587 |
| Gpr63   | -0,39 | 0,374466999 | 0,09  | 0,924525687 | -0,51 | 0,64473731  | 0,16  | 0,87407074  | 0,19  | 0,887719506 |
| Gpr65   | 0,35  | 0,778869381 | -0,4  | 0,621112051 | -0,83 | 0,389841181 | 0,12  | 0,847627021 | 0,49  | 0,570469434 |
| Gpr68   | -0,6  | 0,493929    | -0,52 | 0,601295905 | 0,19  | 0,777417583 | 0,71  | 0,132889006 | -0,03 | 0,975441362 |
| Gpr75   | 0,41  | 0,546065357 | 0,01  | 0,995205602 | 0,06  | 0,92807676  | 0,76  | 0,084083957 | 0,1   | 0,909024113 |
| Gpr82   | 0,19  | 0,829299665 | -0,16 | 0,906777728 | 0,01  | 0,990836784 | 0,55  | 0,353417289 | 0,07  | 0,937563719 |
| Gpr83   | 0,07  | 0,948926586 | 0,62  | 0,267289826 | -0,34 | 0,802757077 | 0,23  | 0,758875849 | -0,05 | 0,965244101 |
| Gpr84   | -0,12 | 0,926316023 | -0,38 | 0,771072648 | 2,46  | 0,026694519 | 0,9   | 0,635869722 | -0,58 | 0,72187317  |
| Gpr85   | 0,04  | 0,972974739 | 0,12  | 0,830849036 | -0,52 | 0,517794976 | 0,12  | 0,887977289 | 0,33  | 0,757126028 |
| Gpr87   | 0,21  | 0,701086418 | -0,1  | 0,932292974 | 0,19  | 0,856923247 | 0,23  | 0,601675182 | -0,07 | 0,939930189 |
| Gpr88   | -0,02 | 0,981042688 | 0,15  | 0,794404033 | 0,04  | 0,961464515 | 0,06  | 0,898285908 | 0,88  | 0,137394562 |
| Gpr89   | -0,4  | 0,530808572 | -0,31 | 0,627530254 | 0,47  | 0,774393816 | -0,08 | 0,880159086 | -0,08 | 0,941241684 |
| Gprasp1 | 0,33  | 0,455526465 | -0,17 | 0,722191399 | -0,12 | 0,898382247 | -0,39 | 0,50447234  | 0,21  | 0,803738269 |
| Gprasp2 | 0,47  | 0,270547821 | -0,25 | 0,831404974 | -0,37 | 0,340829591 | -1,18 | 0,031119782 | 0,48  | 0,556499775 |
| Gprc5a  | -0,52 | 0,186254202 | -0,71 | 0,531530511 | 0,47  | 0,513446928 | -1,42 | 0,085036096 | -0,79 | 0,089553454 |
| Gprc5b  | -0,3  | 0,519823113 | -0,08 | 0,917623085 | 0,9   | 0,027210542 | 1,33  | 0,014372999 | -0,21 | 0,75695866  |
| Gprc5c  | -0,35 | 0,593540946 | -0,22 | 0,824853794 | -0,29 | 0,715497532 | -1    | 0,249571811 | -0,92 | 0,158575013 |
| Gprc5d  | -0,04 | 0,958512892 | -0,23 | 0,612950015 | -0,01 | 0,995363482 | 0,02  | 0,985897275 | -0,08 | 0,929127539 |
| Gprc6a  | -0,09 | 0,892124736 | 0,11  | 0,9152526   | -0,29 | 0,700940473 | -0,16 | 0,820103742 | -0,05 | 0,956610289 |
| Gprin1  | 0,2   | 0,638945833 | 0,21  | 0,747707816 | -0,18 | 0,746570045 | 0,04  | 0,949239972 | 0,17  | 0,817563348 |
| Gprin2  | 0,08  | 0,864994167 | -0,01 | 0,994802028 | -0,1  | 0,867580642 | 0,05  | 0,908141892 | 0,05  | 0,949544475 |
| Gprin3  | 0,36  | 0,698332739 | -0,08 | 0,894640653 | 0,37  | 0,777417583 | 2,76  | 0,003009221 | 0,33  | 0,7818424   |
| Gps1    | -0,25 | 0,548190621 | -0,11 | 0,852068212 | 0,44  | 0,599648113 | 0,29  | 0,368598637 | -0,14 | 0,865258929 |
| Gps2    | 0,05  | 0,922118639 | -0,01 | 0,998237793 | 0     | 0,997220401 | -0,16 | 0,754003385 | -0,08 | 0,928724353 |
| Gpsm1   | -0,44 | 0,259052697 | -0,08 | 0,917642287 | 0,16  | 0,868590766 | -0,08 | 0,86410687  | -0,41 | 0,493919589 |
| Gpsm2   | -0,33 | 0,70854652  | -0,17 | 0,873881223 | 0,52  | 0,52008112  | 0,31  | 0,677875835 | 0     | 0,99888749  |
| Gpsm3   | -0,1  | 0,910119824 | 0,3   | 0,732847182 | -0,03 | 0,982305856 | 0,28  | 0,620341254 | -0,08 | 0,940438527 |
| Gpt     | -0,03 | 0,984124693 | 0,05  | 0,95240412  | 0,49  | 0,519061684 | -0,39 | 0,403948528 | -0,21 | 0,874717264 |
| Gpt2    | 0,24  | 0,593540946 | 0,09  | 0,941874406 | -0,24 | 0,842919139 | 0,28  | 0,745782308 | -0,14 | 0,924811486 |
| Gpx1    | 0,12  | 0,803492493 | 0,01  | 0,99691664  | -0,02 | 0,975771514 | -0,08 | 0,845813504 | 0,14  | 0,840952901 |



|          |       |             |       |             |       |             |       |             |       |             |
|----------|-------|-------------|-------|-------------|-------|-------------|-------|-------------|-------|-------------|
| Gpx2     | -0,16 | 0,78999702  | -0,01 | 0,996113371 | -0,45 | 0,565822909 | 0,08  | 0,829087694 | -0,17 | 0,866285506 |
| Gpx2-ps1 | -0,03 | 0,981412917 | -0,45 | 0,538642201 | -0,3  | 0,736422567 | 0,39  | 0,541298462 | -0,29 | 0,758052028 |
| Gpx3     | -0,6  | 0,522076759 | 0,57  | 0,496728091 | -0,74 | 0,657277431 | -1,16 | 0,137669798 | 0,5   | 0,80155635  |
| Gpx4     | 0,2   | 0,742995005 | 0,33  | 0,700306103 | 0     | 0,999931921 | -0,27 | 0,555564163 | -0,28 | 0,765323508 |
| Gpx5     | -0,59 | 0,184390336 | 0,38  | 0,468865033 | -0,02 | 0,984778342 | -0,44 | 0,369703995 | 0,04  | 0,968130547 |
| Gpx6     | -0,03 | 0,964124037 | 0,38  | 0,633741009 | 0,02  | 0,979689864 | -0,09 | 0,938226167 | 0,16  | 0,927536545 |
| Gpx7     | -0,35 | 0,532146744 | -0,39 | 0,377612713 | 0,32  | 0,595535442 | 0,64  | 0,067635432 | -0,58 | 0,287590871 |
| Gpx8     | -0,38 | 0,586458491 | -0,92 | 0,557225381 | 1     | 0,076696168 | -0,72 | 0,510508734 | -0,2  | 0,893439982 |
| Gramd1a  | 0,28  | 0,52132136  | -0,02 | 0,984710854 | 0,01  | 0,993280531 | 0,88  | 0,073223115 | -0,41 | 0,442579293 |
| Gramd1b  | -0,32 | 0,729638783 | 0,11  | 0,857211054 | 0,2   | 0,791876238 | 0,46  | 0,56693064  | -0,62 | 0,444241195 |
| Gramd1c  | -0,42 | 0,351381228 | -0,15 | 0,725366177 | -0,21 | 0,785676028 | 0,05  | 0,934783147 | -0,14 | 0,878996949 |
| Gramd2   | 0,11  | 0,829299665 | -0,04 | 0,97301632  | 0,07  | 0,917355383 | 0,03  | 0,967866794 | -0,09 | 0,900126162 |
| Gramd3   | 0,02  | 0,984223418 | -0,12 | 0,874195024 | 0,15  | 0,835677021 | 0,95  | 0,026955373 | -0,14 | 0,859574134 |
| Gramd4   | -0,15 | 0,89792709  | 0,3   | 0,72665096  | -0,22 | 0,828036964 | -0,71 | 0,243610071 | -0,02 | 0,990839896 |
| Grap     | -0,64 | 0,235108656 | -0,19 | 0,729236145 | 1,02  | 0,187270439 | 0,2   | 0,698748695 | -0,68 | 0,209121195 |
| Grap2    | 0,44  | 0,54401985  | -0,32 | 0,599495018 | 0,09  | 0,909233941 | 0,65  | 0,177192888 | 0,3   | 0,623046105 |
| Grasp    | -0,78 | 0,149941264 | 0,21  | 0,62432723  | 0,39  | 0,823823322 | -1,09 | 0,036180488 | -0,47 | 0,338461772 |
| Grb10    | -0,04 | 0,960597621 | -0,31 | 0,732071998 | 0,62  | 0,270313252 | 0,84  | 0,161548806 | -0,38 | 0,655657337 |
| Grb14    | 0,63  | 0,296031134 | -0,17 | 0,884434898 | -0,3  | 0,71593256  | -2,42 | 0,022522121 | -0,95 | 0,214056891 |
| Grb2     | 0,09  | 0,853351904 | 0,39  | 0,417078686 | -0,22 | 0,70130819  | 0,51  | 0,301051081 | 0,11  | 0,890760783 |
| Grb7     | -0,06 | 0,926007268 | 0,32  | 0,668632197 | 0,69  | 0,516254562 | -0,34 | 0,434494228 | 0,03  | 0,983469081 |
| Grcc10   | 0,11  | 0,811859636 | -0,04 | 0,935984823 | 0,16  | 0,803333635 | 0,11  | 0,752341067 | -0,34 | 0,462558109 |
| Greb1    | 0,06  | 0,964857772 | -0,06 | 0,927019454 | 0,36  | 0,635864143 | -0,63 | 0,545372369 | -0,44 | 0,731411172 |
| Greb1l   | 0,54  | 0,297241742 | -0,11 | 0,948496432 | 0,06  | 0,959981309 | -0,03 | 0,981579758 | 1,17  | 0,076945176 |
| Grem1    | -0,22 | 0,741656732 | -0,09 | 0,900782278 | 0,06  | 0,934813979 | -0,8  | 0,053452563 | -0,59 | 0,374616846 |
| Grem2    | 0,09  | 0,841140165 | -0,16 | 0,789051952 | 0,01  | 0,997220401 | 0,1   | 0,812558961 | -0,06 | 0,967522546 |
| Grhl1    | 0,36  | 0,572424452 | 0,31  | 0,601295905 | 0,16  | 0,828638095 | -0,16 | 0,814971655 | 0,2   | 0,807620467 |
| Grhl2    | 0,15  | 0,805438081 | -0,22 | 0,74245372  | -0,09 | 0,919689872 | 0,18  | 0,779547737 | -0,2  | 0,821727352 |
| Grhl3    | 0,09  | 0,893283341 | -0,05 | 0,965147491 | -0,81 | 0,157273721 | -0,21 | 0,820466863 | 0,16  | 0,886027227 |
| Grhpr    | -0,15 | 0,825618574 | -0,45 | 0,458221278 | 1,09  | 0,036818657 | 0,8   | 0,091159146 | -1,43 | 0,013431226 |
| Gria1    | -0,14 | 0,796294821 | 0,15  | 0,894563348 | -0,11 | 0,864411302 | 0     | 1           | 0,21  | 0,769280739 |
| Gria2    | 0,12  | 0,856984761 | 0,3   | 0,634424292 | 0,07  | 0,949851253 | -0,02 | 0,973328764 | 0,21  | 0,757428993 |
| Gria3    | -0,06 | 0,936696742 | 0,29  | 0,624712123 | 0,15  | 0,878636183 | -1,02 | 0,024282032 | 0,19  | 0,783490449 |
| Gria4    | 0,08  | 0,905834527 | 0,47  | 0,489673761 | 0,12  | 0,895434884 | -0,27 | 0,572618729 | -0,36 | 0,734750869 |
| Grid1    | -0,06 | 0,91960004  | -0,35 | 0,626130765 | -0,23 | 0,747599709 | 0,23  | 0,748234235 | 0,17  | 0,860058375 |

|          |       |             |       |             |       |             |       |             |       |             |
|----------|-------|-------------|-------|-------------|-------|-------------|-------|-------------|-------|-------------|
| Grid2    | 0,36  | 0,465060033 | 0,01  | 0,998766432 | -0,12 | 0,881463812 | -0,28 | 0,529746075 | 0,01  | 0,992980215 |
| Grid2ip  | -0,15 | 0,821456161 | 0,12  | 0,89545828  | -0,2  | 0,713620433 | 0,44  | 0,309360585 | 0,19  | 0,778507273 |
| Grifin   | 0,2   | 0,739033649 | 0,26  | 0,682153883 | 0,01  | 0,987076439 | 0,09  | 0,935773257 | 0,32  | 0,712793529 |
| Grik1    | -0,08 | 0,94916801  | 0,23  | 0,80097084  | -0,13 | 0,880622107 | 0,3   | 0,647299002 | 0,41  | 0,628728585 |
| Grik2    | 0,07  | 0,892124736 | 0,09  | 0,915833614 | -0,32 | 0,432229079 | -0,08 | 0,933519451 | -0,28 | 0,78512653  |
| Grik3    | 0,27  | 0,645559207 | -0,08 | 0,889215021 | 0,09  | 0,903918012 | 0,38  | 0,2423686   | 0,05  | 0,961235308 |
| Grik4    | 0,19  | 0,721378796 | 0,26  | 0,732044571 | -0,24 | 0,638358093 | -0,4  | 0,230237236 | 0,03  | 0,973369302 |
| Grik5    | -0,1  | 0,874146026 | -0,26 | 0,73623784  | 0,35  | 0,576592414 | -0,63 | 0,197270479 | -0,07 | 0,943668392 |
| Grin1    | 0,55  | 0,189393924 | 0,01  | 0,999210601 | -0,01 | 0,997220401 | 0,14  | 0,722349788 | -0,07 | 0,932521789 |
| Grin1os  | -0,04 | 0,953175228 | 0,05  | 0,938638797 | -0,36 | 0,591404136 | -0,78 | 0,103449425 | -0,02 | 0,983494749 |
| Grin2a   | -0,5  | 0,483395607 | 0,16  | 0,882589938 | 0,06  | 0,956894731 | -0,08 | 0,927360713 | 0,23  | 0,794586838 |
| Grin2b   | 0,11  | 0,899909691 | -0,14 | 0,812713089 | -0,04 | 0,960677449 | 0,18  | 0,758519001 | -0,19 | 0,808077941 |
| Grin2c   | 0,07  | 0,885072489 | -0,05 | 0,927205716 | -0,34 | 0,483761569 | 0,26  | 0,521355444 | -0,17 | 0,804576732 |
| Grin2d   | -0,11 | 0,94913976  | -0,3  | 0,846012678 | 1,13  | 0,215429632 | -0,07 | 0,931639562 | -0,23 | 0,879075155 |
| Grin3a   | 0,46  | 0,642385552 | 0,69  | 0,600104667 | 0,26  | 0,714346477 | -1,29 | 0,057045858 | 0,9   | 0,285422876 |
| Grin3b   | -0,28 | 0,58295432  | 0,04  | 0,940770872 | -0,1  | 0,930673542 | 0,15  | 0,785618505 | -0,06 | 0,934344891 |
| Grina    | 0,47  | 0,398752175 | 0,76  | 0,112811585 | -0,36 | 0,561635554 | -0,52 | 0,109316844 | 0,74  | 0,077971342 |
| Grip1    | 0,12  | 0,847613888 | 0,18  | 0,801690086 | 0,14  | 0,868590766 | -0,1  | 0,85301747  | 0,1   | 0,910085178 |
| Grip1os1 | 0,33  | 0,565151777 | -0,15 | 0,728083849 | -0,16 | 0,841563482 | 0,43  | 0,205058711 | -0,13 | 0,855006189 |
| Grip1os2 | 0,53  | 0,343457563 | 0,3   | 0,480241246 | -0,23 | 0,700061351 | -0,25 | 0,451374183 | -0,39 | 0,424301504 |
| Grip2    | 0,23  | 0,616144081 | 0,22  | 0,781046971 | 0,05  | 0,975982548 | -1,63 | 0,020136186 | 0,37  | 0,540922938 |
| Gripap1  | -0,01 | 0,994783616 | -0,07 | 0,934294134 | -0,11 | 0,941627748 | -0,65 | 0,434295291 | 0     | 0,998164722 |
| Grk1     | -0,18 | 0,768809729 | -0,11 | 0,86249304  | -0,28 | 0,603819103 | -0,55 | 0,729857506 | -0,84 | 0,59705803  |
| Grk4     | -0,14 | 0,869565514 | -0,1  | 0,960253381 | 0,57  | 0,6348675   | -1,3  | 0,093819238 | -0,7  | 0,451817916 |
| Grk5     | -0,47 | 0,187868882 | -0,19 | 0,704389345 | 0,01  | 0,992972594 | 1,44  | 0,020217488 | 0,05  | 0,960065122 |
| Grk6     | -0,53 | 0,317205194 | -0,52 | 0,433021363 | 0,07  | 0,963357998 | 0,72  | 0,366721866 | -0,04 | 0,979392852 |
| Grm1     | 0,15  | 0,821267687 | 0,07  | 0,935984823 | -0,29 | 0,712697139 | 0,17  | 0,626786547 | 0,12  | 0,874554354 |
| Grm2     | 0,28  | 0,64776317  | -0,13 | 0,867512619 | -0,37 | 0,462123525 | 0,41  | 0,703751395 | 0,16  | 0,913553402 |
| Grm3     | 0,16  | 0,833382917 | -0,2  | 0,772977288 | -0,49 | 0,308773662 | 0,18  | 0,627687724 | 0,22  | 0,781777975 |
| Grm4     | 0,14  | 0,740974297 | -0,04 | 0,982786635 | -0,35 | 0,59480175  | 0,37  | 0,560158352 | -0,08 | 0,955910202 |
| Grm5     | 0     | 1           | -0,38 | 0,625481493 | 0,06  | 0,952019801 | 0,31  | 0,640127733 | 0,11  | 0,920355527 |
| Grm6     | -0,64 | 0,357036798 | -0,18 | 0,90164068  | 0,41  | 0,584463665 | 0,08  | 0,900662145 | -0,42 | 0,617249007 |
| Grm7     | -0,12 | 0,895682399 | 0,87  | 0,163815354 | -0,06 | 0,953951069 | -0,57 | 0,298021209 | -0,25 | 0,765002083 |
| Grm8     | 0,5   | 0,576009654 | 0,12  | 0,896322235 | -0,14 | 0,850598461 | -0,38 | 0,360516895 | -0,08 | 0,924073401 |
| Grn      | 0,28  | 0,652819827 | 0,36  | 0,351449781 | -0,32 | 0,635864143 | 0,14  | 0,720329719 | -0,01 | 0,987680175 |

|           |       |             |       |             |       |             |       |             |       |             |
|-----------|-------|-------------|-------|-------------|-------|-------------|-------|-------------|-------|-------------|
| Grp       | 1,89  | 0,059511737 | 1,7   | 0,115555997 | -1,04 | 0,083676252 | 0,51  | 0,305192908 | -0,25 | 0,796628329 |
| Grpel1    | -0,17 | 0,737459992 | -0,09 | 0,896322235 | 0,19  | 0,772782651 | 0,15  | 0,661326756 | -0,11 | 0,889614174 |
| Grpel2    | -0,51 | 0,537473384 | 0,18  | 0,748057088 | 0,58  | 0,37541846  | 0,4   | 0,376631277 | 0,34  | 0,590396118 |
| Grpr      | -0,56 | 0,681657169 | -0,12 | 0,89081665  | -0,02 | 0,984407511 | 0,29  | 0,66078003  | 0,36  | 0,511300791 |
| Grrp1     | -0,13 | 0,8634587   | 0,32  | 0,501438027 | -0,34 | 0,550662565 | -0,47 | 0,314061582 | 0,21  | 0,770148689 |
| Grsf1     | -0,12 | 0,807412597 | 0,6   | 0,216491969 | 0,36  | 0,57717258  | 0,27  | 0,768236902 | 0,03  | 0,985269236 |
| Grtp1     | -0,05 | 0,929262949 | 0,01  | 0,993789602 | 0,64  | 0,294972378 | -0,04 | 0,943508556 | -0,06 | 0,958068117 |
| Grwd1     | -0,39 | 0,419591944 | -0,48 | 0,467271424 | 0,3   | 0,599364835 | 0,76  | 0,118943306 | -0,37 | 0,56065793  |
| Grxcr1    | 0,17  | 0,718284878 | 0,22  | 0,718769238 | 0,12  | 0,861307315 | -0,13 | 0,741452902 | -0,17 | 0,792305774 |
| Grxcr2    | -0,05 | 0,932713291 | 0,18  | 0,661734303 | 0,3   | 0,656925539 | 0,24  | 0,755303978 | -0,22 | 0,758052028 |
| Gsap      | 0,68  | 0,200825194 | 0,86  | 0,196387496 | -0,52 | 0,465949919 | 2,46  | 0,004704128 | 1,3   | 0,048692913 |
| Gsc       | -0,03 | 0,975098373 | 0,07  | 0,940046211 | -0,24 | 0,792016423 | 0,37  | 0,506128033 | 0,24  | 0,726351163 |
| Gsc2      | 0,21  | 0,666623323 | -0,01 | 0,994802028 | -0,26 | 0,712697139 | 0,38  | 0,472048188 | 0,16  | 0,78960943  |
| Gsdma     | -0,17 | 0,842851909 | 0,48  | 0,371450754 | 0,17  | 0,738890123 | -0,83 | 0,164381304 | -0,11 | 0,93193727  |
| Gsdma3    | 0,09  | 0,929470074 | -0,04 | 0,964875723 | 0,05  | 0,967767582 | -0,06 | 0,923775458 | 0,03  | 0,978604922 |
| Gsdmc     | 0,42  | 0,621890075 | -0,29 | 0,897574732 | 0,17  | 0,915321116 | 0,79  | 0,307458691 | 0,56  | 0,518022769 |
| Gsdmc2    | 0,24  | 0,899079341 | 0,9   | 0,455170487 | -0,57 | 0,598179126 | -0,12 | 0,907485612 | 1,36  | 0,142148848 |
| Gsdmc3    | -0,06 | 0,930925497 | 0,02  | 0,997700959 | 0,55  | 0,349860932 | -0,21 | 0,757685993 | -0,03 | 0,984125319 |
| Gsdmc4    | -0,79 | 0,136292434 | 0,44  | 0,520493846 | -0,01 | 0,997581017 | 0,33  | 0,704798975 | 0,01  | 0,9939542   |
| Gsdmcl1   | -0,05 | 0,948926586 | 0,1   | 0,852891507 | 0,22  | 0,778653031 | 0,32  | 0,347662455 | -0,06 | 0,953825631 |
| Gsdmcl2   | 0,46  | 0,455714377 | -0,04 | 0,965872249 | -0,19 | 0,786933951 | 0,21  | 0,748527035 | 0,37  | 0,604239727 |
| Gsdmcl-ps | -0,22 | 0,612186892 | 0,6   | 0,466954112 | -0,33 | 0,555533983 | 0,26  | 0,667817672 | -0,23 | 0,801087157 |
| Gsdmd     | 0,62  | 0,260634235 | 0,99  | 0,077698935 | -0,98 | 0,09059546  | -0,05 | 0,900691702 | 0,91  | 0,058814936 |
| Gse1      | 0,19  | 0,761832919 | 0,05  | 0,925569254 | 0,24  | 0,703045192 | -0,56 | 0,126788907 | -0,28 | 0,623214829 |
| Gsg1      | -0,3  | 0,681105812 | -0,12 | 0,842663656 | 0,07  | 0,930193129 | -0,84 | 0,300673159 | -0,15 | 0,932742551 |
| Gsg1l     | -0,3  | 0,501884295 | -0,54 | 0,424863079 | -0,03 | 0,97548193  | -0,03 | 0,967866794 | 0,03  | 0,969617491 |
| Gsg1l2    | 0,1   | 0,923816656 | -0,01 | 0,999661053 | 0,59  | 0,508055997 | -0,21 | 0,807101657 | 0,18  | 0,807725933 |
| Gsg2      | -0,37 | 0,567790521 | -0,32 | 0,671319666 | 0,16  | 0,806417365 | 0,54  | 0,307366196 | -0,18 | 0,890957032 |
| Gsk3a     | -0,14 | 0,772012849 | 0     | 1           | -0,4  | 0,588879542 | -0,37 | 0,352168551 | -0,2  | 0,708814033 |
| Gsk3b     | -0,36 | 0,373662022 | -0,02 | 0,9860901   | 0,1   | 0,879211997 | 0,02  | 0,963343418 | -0,11 | 0,890833196 |
| Gskip     | 0,17  | 0,738714467 | -0,32 | 0,594415097 | 0,23  | 0,686625108 | 0     | 1           | -0,5  | 0,35982462  |
| Gsn       | 0,4   | 0,677390848 | -0,1  | 0,813516293 | 0,69  | 0,151585276 | -1,55 | 0,020845025 | -0,52 | 0,653769438 |
| Gspt1     | -0,39 | 0,441176207 | -0,27 | 0,606999442 | 0,33  | 0,716743339 | -0,22 | 0,642532133 | -0,15 | 0,825966687 |
| Gspt2     | 0,18  | 0,853962146 | -0,57 | 0,614530823 | -0,03 | 0,988721964 | -1,01 | 0,104846189 | -0,18 | 0,874829878 |
| Gsr       | -0,1  | 0,886725624 | -0,17 | 0,802979985 | -0,07 | 0,94940954  | 0,62  | 0,083062156 | -0,39 | 0,471919432 |

|         |       |             |       |             |       |             |       |             |       |             |
|---------|-------|-------------|-------|-------------|-------|-------------|-------|-------------|-------|-------------|
| Gss     | -0,39 | 0,443291127 | 0,3   | 0,664787536 | -0,53 | 0,506787649 | 0,14  | 0,75485675  | -0,32 | 0,592504566 |
| Gssos1  | -0,34 | 0,494884125 | -0,1  | 0,920755087 | -0,22 | 0,90104476  | -1,03 | 0,386914893 | -0,05 | 0,983469081 |
| Gsta1   | 0,04  | 0,948291116 | 0,11  | 0,883843639 | 0,03  | 0,965539887 | -0,27 | 0,452966368 | 0,05  | 0,949539304 |
| Gsta3   | -0,1  | 0,903817676 | -0,32 | 0,531130014 | 0,15  | 0,825801308 | -1,73 | 0,040750961 | -0,7  | 0,403539454 |
| Gsta4   | -0,37 | 0,392217599 | 0,33  | 0,786394409 | 0,28  | 0,761599136 | -0,98 | 0,233254474 | -0,09 | 0,937536158 |
| Gstcd   | -0,5  | 0,597297093 | -0,98 | 0,137744341 | 0,1   | 0,930549237 | 0,58  | 0,320980074 | -0,17 | 0,902802615 |
| Gstk1   | -0,8  | 0,291156435 | -0,26 | 0,820806352 | 0,05  | 0,976042637 | -2,5  | 0,004704128 | -1,37 | 0,032309605 |
| Gstm1   | 0,12  | 0,856118781 | -0,03 | 0,964878448 | 0,27  | 0,762549825 | -0,78 | 0,188844849 | -0,35 | 0,679090502 |
| Gstm3   | 0,31  | 0,681371768 | 0,09  | 0,941628939 | -0,03 | 0,982305856 | -0,2  | 0,785121965 | 0,02  | 0,987146256 |
| Gstm4   | -0,32 | 0,764189777 | -0,07 | 0,971118451 | -0,65 | 0,368620918 | -0,35 | 0,608827432 | -0,58 | 0,434997258 |
| Gstm5   | -0,63 | 0,172698611 | -1,1  | 0,165411019 | 0,93  | 0,450947936 | 0,34  | 0,760627291 | -0,56 | 0,608004947 |
| Gstm6   | -0,37 | 0,610509826 | -0,56 | 0,204308521 | 0,17  | 0,887085755 | 0,08  | 0,911768604 | 0,16  | 0,873506336 |
| Gstm7   | 0,21  | 0,701627731 | 0,39  | 0,420485441 | -0,03 | 0,975448682 | -2,51 | 0,038935822 | -0,66 | 0,634076489 |
| Gsto1   | 0,25  | 0,615064142 | 0,01  | 0,994735911 | 0,55  | 0,457506381 | 1,06  | 0,079847849 | 0,22  | 0,735152891 |
| Gsto2   | 0,49  | 0,460231397 | -0,07 | 0,976583732 | 0,07  | 0,96186488  | -1,1  | 0,254484748 | -0,2  | 0,923530475 |
| Gstp1   | -0,03 | 0,968370059 | -0,25 | 0,49941722  | -0,3  | 0,716352322 | -0,54 | 0,402823171 | 0,07  | 0,9556406   |
| Gstp2   | 0,09  | 0,928246602 | -0,42 | 0,490814009 | 0,25  | 0,740579016 | -0,42 | 0,390925049 | -0,34 | 0,703670469 |
| Gstt1   | 0,29  | 0,732196499 | -0,18 | 0,860629851 | 0,55  | 0,628427952 | -0,21 | 0,698459607 | -0,43 | 0,424134691 |
| Gstt2   | 0,46  | 0,463685063 | 0,27  | 0,685664507 | 0,28  | 0,811929784 | -0,46 | 0,507570518 | 0,16  | 0,847218294 |
| Gstt3   | 0,08  | 0,948926586 | -0,68 | 0,576723643 | 0,63  | 0,590619197 | 0,45  | 0,699020605 | 0,48  | 0,742505595 |
| Gstt4   | 0,43  | 0,644756656 | -0,92 | 0,275147283 | 0,86  | 0,364057848 | 0,09  | 0,920640884 | -0,08 | 0,947894004 |
| Gstz1   | -0,46 | 0,744211539 | 0,28  | 0,874356923 | 0,78  | 0,480330387 | -0,61 | 0,62296101  | -0,72 | 0,745134899 |
| Gsx1    | 0,13  | 0,837255274 | -0,19 | 0,757293036 | -0,43 | 0,426442479 | -0,07 | 0,852024171 | 0,25  | 0,673120647 |
| Gsx2    | 0,06  | 0,91366065  | 0,4   | 0,400515868 | 0,08  | 0,925248877 | 0,16  | 0,707902199 | 0,23  | 0,76942924  |
| Gtdc1   | -0,42 | 0,452220464 | 0,15  | 0,805789332 | -0,51 | 0,477602326 | -0,62 | 0,077177026 | 0,19  | 0,742982183 |
| Gtf2a1  | 0,22  | 0,812762737 | -0,15 | 0,805467498 | 0,41  | 0,611145451 | -0,66 | 0,093477927 | 0,1   | 0,887859063 |
| Gtf2a11 | -0,3  | 0,473832525 | 0,05  | 0,973945454 | 0,12  | 0,877366773 | -0,08 | 0,926898299 | 0,2   | 0,750453219 |
| Gtf2a2  | 0,04  | 0,965444591 | 0,21  | 0,77148563  | 0,03  | 0,969262382 | -0,54 | 0,726795266 | -0,12 | 0,961353039 |
| Gtf2b   | -0,16 | 0,834672627 | 0,32  | 0,487451484 | 0,28  | 0,659555232 | -0,38 | 0,461412838 | 0,08  | 0,937558003 |
| Gtf2e1  | -0,7  | 0,282204115 | 0,08  | 0,923022018 | 0,77  | 0,302861841 | -0,29 | 0,635482645 | -0,59 | 0,325920244 |
| Gtf2e2  | 0,09  | 0,870145675 | -0,32 | 0,721655997 | 0,65  | 0,566665175 | 1,12  | 0,089304613 | 0,06  | 0,939448119 |
| Gtf2f1  | -0,19 | 0,617452158 | 0,17  | 0,686908694 | 0,11  | 0,864411302 | -0,3  | 0,65831791  | -0,11 | 0,916173996 |
| Gtf2f2  | 0,13  | 0,836877571 | -0,27 | 0,646613262 | 0,17  | 0,878636183 | 0,79  | 0,078619795 | 0,09  | 0,932846086 |
| Gtf2h1  | 0,08  | 0,918458152 | 0,09  | 0,906234611 | -0,1  | 0,897874715 | 0,02  | 0,978569268 | 0,18  | 0,799292062 |
| Gtf2h2  | -0,26 | 0,610662221 | -0,37 | 0,683695236 | -0,17 | 0,869952072 | 0,1   | 0,888668493 | 0,37  | 0,562557824 |

|               |       |             |       |             |       |             |       |             |       |             |
|---------------|-------|-------------|-------|-------------|-------|-------------|-------|-------------|-------|-------------|
| Gtf2h3        | -0,43 | 0,445885062 | -0,13 | 0,810875398 | 0,02  | 0,991240121 | 0,23  | 0,573563135 | -0,1  | 0,91314596  |
| Gtf2h4        | -0,22 | 0,722504009 | -0,33 | 0,471355059 | 0,08  | 0,95204022  | 0,62  | 0,108612006 | -0,08 | 0,946954581 |
| Gtf2h5        | -0,39 | 0,260634235 | -0,24 | 0,586721336 | 0,19  | 0,751090942 | 0,69  | 0,069737057 | -0,09 | 0,900126162 |
| Gtf2i         | -0,52 | 0,239601221 | -0,3  | 0,459417799 | 0,24  | 0,789396261 | -0,13 | 0,839333217 | -0,81 | 0,160155445 |
| Gtf2ird1      | -0,22 | 0,69656531  | -0,22 | 0,739080134 | -0,22 | 0,707571856 | 0,36  | 0,345009795 | 0,45  | 0,38635503  |
| Gtf2ird2      | -0,38 | 0,720829271 | 0,36  | 0,618450333 | 0,16  | 0,882540073 | 0,4   | 0,626786547 | -0,09 | 0,945776926 |
| Gtf3a         | -0,23 | 0,757032046 | -0,55 | 0,353375121 | 0,32  | 0,714346477 | 0,41  | 0,413553771 | -0,33 | 0,608724559 |
| Gtf3c1        | -0,38 | 0,373794253 | -0,26 | 0,508633526 | 0,44  | 0,371125662 | 0,34  | 0,555857861 | -0,41 | 0,582734169 |
| Gtf3c2        | 0,23  | 0,771381752 | -0,28 | 0,754006618 | 0,31  | 0,764206488 | -0,17 | 0,796985281 | -0,29 | 0,673577848 |
| Gtf3c3        | -0,28 | 0,718901325 | -0,17 | 0,66659944  | -0,01 | 0,996683828 | 0,44  | 0,568171098 | -0,42 | 0,619416028 |
| Gtf3c4        | -0,25 | 0,729638783 | -0,14 | 0,911711738 | 0,77  | 0,279980018 | 0,09  | 0,921036173 | -0,25 | 0,745574572 |
| Gtf3c5        | 0,13  | 0,779607388 | -0,09 | 0,901000778 | 0,3   | 0,628048897 | 0,13  | 0,900529161 | -0,09 | 0,943267656 |
| Gtf3c6        | -0,26 | 0,620361515 | 0,06  | 0,948314657 | 0,63  | 0,570841432 | 0,18  | 0,785756767 | 0,09  | 0,914498972 |
| Gtpbp1        | -0,18 | 0,70137787  | -0,07 | 0,93451524  | 0,1   | 0,889371168 | -0,45 | 0,227822618 | -0,35 | 0,550083777 |
| Gtpbp10       | -0,19 | 0,845597958 | 0,67  | 0,508783129 | 0,74  | 0,427338848 | 0,45  | 0,757184832 | 0,2   | 0,939948423 |
| Gtpbp2        | 0,11  | 0,886741208 | 0,45  | 0,370515616 | -0,74 | 0,187270439 | 0,63  | 0,283632683 | 1,23  | 0,053907225 |
| Gtpbp3        | -0,22 | 0,800023642 | 0,1   | 0,924525687 | -0,27 | 0,698451287 | -0,01 | 0,991334473 | 0,19  | 0,789358981 |
| Gtpbp4        | -0,45 | 0,451211285 | -0,13 | 0,823246376 | 0,19  | 0,814956693 | 0,39  | 0,356776772 | 0,18  | 0,819072786 |
| Gtpbp6        | 0,09  | 0,907748757 | 0,01  | 0,996865461 | -0,13 | 0,868590766 | -0,28 | 0,492501823 | -0,02 | 0,979456872 |
| Gtpbp8        | -0,3  | 0,761120978 | -0,48 | 0,500152819 | -0,07 | 0,95303117  | -0,81 | 0,072102182 | 0,15  | 0,880134862 |
| Gt(ROSA)26Sor | 0,23  | 0,536802237 | -0,12 | 0,900280666 | 0,38  | 0,638965268 | -0,41 | 0,422034375 | -0,03 | 0,97425848  |
| Gtse1         | -0,96 | 0,083421478 | -1,48 | 0,137833549 | 0,66  | 0,271623872 | 1,68  | 0,019602745 | -0,2  | 0,792404969 |
| Gtsf1         | 0,59  | 0,421983538 | 0,24  | 0,625875078 | -0,16 | 0,8271738   | -0,24 | 0,61217889  | -0,39 | 0,562557824 |
| Gtsf1l        | -0,4  | 0,526237328 | 0,17  | 0,690317074 | 0,01  | 0,993071391 | 0,14  | 0,829691356 | 0,35  | 0,655956123 |
| Guca1a        | 0,02  | 0,981827473 | 0,23  | 0,671319666 | -0,07 | 0,934813979 | -0,53 | 0,34969032  | -0,43 | 0,453749913 |
| Guca1b        | -0,14 | 0,88636449  | 0,65  | 0,599495018 | -0,69 | 0,152885921 | -0,6  | 0,621768014 | -0,19 | 0,913274952 |
| Guca2a        | 0,68  | 0,507111846 | 0,68  | 0,392843884 | -0,86 | 0,560191012 | -1,25 | 0,228907634 | -0,59 | 0,608004947 |
| Guca2b        | 0,3   | 0,600313897 | 0,16  | 0,849334395 | 0,18  | 0,786933951 | -1,08 | 0,119127648 | 0,37  | 0,7997489   |
| Gucd1         | 0,06  | 0,919567534 | 0,06  | 0,965147491 | -0,37 | 0,700940473 | -0,2  | 0,841103649 | -0,29 | 0,834671019 |
| Gucy1a2       | 0,13  | 0,916074217 | 0,41  | 0,746998924 | 0,3   | 0,823823322 | -0,79 | 0,378102359 | 0,05  | 0,976743304 |
| Gucy1a3       | -0,62 | 0,689093898 | -0,06 | 0,94766092  | -0,15 | 0,902672106 | -2,57 | 0,010284695 | -0,87 | 0,160271199 |
| Gucy1b2       | 0,1   | 0,87094817  | -0,49 | 0,349551393 | -0,12 | 0,874098993 | 0,37  | 0,428295778 | -0,05 | 0,961281513 |
| Gucy1b3       | -0,39 | 0,800023642 | -0,32 | 0,568187167 | -0,26 | 0,791814863 | -0,94 | 0,306441142 | -0,21 | 0,900436874 |
| Gucy2c        | 0,02  | 0,986782335 | 0,14  | 0,922123472 | -0,11 | 0,915598278 | -0,08 | 0,884057965 | 0,16  | 0,825564898 |
| Gucy2d        | 0,03  | 0,976574175 | -0,31 | 0,666450149 | 0,04  | 0,97041109  | 0,02  | 0,985865561 | 0,22  | 0,823098095 |

|        |       |             |       |             |       |             |       |             |       |             |
|--------|-------|-------------|-------|-------------|-------|-------------|-------|-------------|-------|-------------|
| Gucy2e | 0,47  | 0,259797168 | 0,08  | 0,935329426 | -0,07 | 0,934813979 | 0,03  | 0,95852873  | -0,07 | 0,927536545 |
| Gucy2f | 0,27  | 0,718369124 | 0,18  | 0,800591362 | 0,3   | 0,6021281   | -0,29 | 0,587319918 | 0,28  | 0,702402249 |
| Gucy2g | -0,08 | 0,905414735 | 0,44  | 0,479695965 | -0,28 | 0,659694447 | -0,31 | 0,578867273 | 0,1   | 0,928724353 |
| Guf1   | -0,63 | 0,416726762 | -0,29 | 0,587634717 | 1,2   | 0,199678278 | -0,31 | 0,357531433 | -0,41 | 0,403234311 |
| Guk1   | 0,21  | 0,810208393 | 0,09  | 0,924916733 | 0,25  | 0,76031147  | 0,24  | 0,639200952 | -0,04 | 0,971911885 |
| Gulo   | 0,06  | 0,928435159 | 0,13  | 0,902996554 | 0,18  | 0,819026099 | -0,5  | 0,268511831 | -0,24 | 0,775441452 |
| Gulp1  | -1,09 | 0,197271952 | -0,77 | 0,531718087 | 1,8   | 0,042631481 | -0,21 | 0,878764191 | -0,46 | 0,660989136 |
| Gusb   | -0,6  | 0,152304573 | -0,72 | 0,165445015 | 0,46  | 0,598063616 | 0,71  | 0,068094822 | -1,05 | 0,044318892 |
| Gxylt1 | -0,6  | 0,186254202 | -0,04 | 0,945143056 | 0,16  | 0,86894173  | -0,12 | 0,856710718 | 0,06  | 0,95985938  |
| Gxylt2 | 0,37  | 0,632053719 | 0,05  | 0,927073711 | 0,13  | 0,923350407 | -1    | 0,124142377 | -0,95 | 0,145317527 |
| Gyg    | -0,2  | 0,614878886 | 0,28  | 0,540345995 | 0,11  | 0,899387868 | 0,69  | 0,113302137 | 0,16  | 0,818378473 |
| Gykl1  | 0,04  | 0,940936429 | -0,4  | 0,583764309 | -0,65 | 0,402409115 | 0,3   | 0,560447427 | 0,29  | 0,574171307 |
| Gylt1b | 0,01  | 0,995658455 | -0,35 | 0,650034357 | 0,46  | 0,60848236  | -0,05 | 0,949432584 | 0,16  | 0,796713037 |
| Gypa   | -0,25 | 0,571404655 | 0,1   | 0,930983876 | -0,14 | 0,869972156 | 0,15  | 0,641292405 | -0,07 | 0,939448119 |
| Gypc   | -1,03 | 0,212025802 | -0,05 | 0,975103597 | -0,53 | 0,681607911 | 0,15  | 0,955808624 | -0,41 | 0,816305974 |
| Gys1   | 0,16  | 0,777632809 | 0,14  | 0,898256272 | 0,43  | 0,431861347 | 1,03  | 0,025158554 | -0,76 | 0,128620629 |
| Gys2   | 0,31  | 0,583196213 | 0,11  | 0,837500541 | -0,18 | 0,787071155 | -0,27 | 0,736704521 | -0,26 | 0,819065403 |
| Gzf1   | 0,02  | 0,990885669 | 0,12  | 0,791426435 | 0     | 0,998479656 | -0,18 | 0,838587666 | 0,05  | 0,976743304 |
| Gzma   | 0,36  | 0,503332622 | 0     | 1           | -0,96 | 0,04740982  | 0,93  | 0,14719706  | 0,96  | 0,418941717 |
| Gzmb   | 0,21  | 0,902628825 | 0,68  | 0,846804105 | -0,82 | 0,648438146 | 0,47  | 0,692059018 | 0,72  | 0,828278125 |
| Gzmc   | 0,23  | 0,698106597 | 0,09  | 0,958663163 | -1,43 | 0,478722042 | 0,28  | 0,599442847 | 0,49  | 0,646672171 |
| Gzmd   | 0,26  | 0,661993372 | -0,01 | 0,992909697 | -0,09 | 0,963221639 | 0,42  | 0,182543552 | 0,21  | 0,697818445 |
| Gzme   | -0,36 | 0,676387559 | -0,26 | 0,836260311 | -0,23 | 0,903675834 | 0,09  | 0,958056332 | -0,07 | 0,969617491 |
| Gzmf   | 0,38  | 0,698332739 | 0,05  | 0,973112447 | -0,3  | 0,917672398 | -0,13 | 0,858484804 | -0,13 | 0,91597137  |
| Gzmg   | 0,19  | 0,752211185 | 0,19  | 0,862430716 | -0,02 | 0,990836784 | -0,17 | 0,801930792 | 0,26  | 0,734215982 |
| Gzmk   | 1,22  | 0,288309106 | -0,27 | 0,853569707 | 0,06  | 0,956894731 | 0,29  | 0,766679066 | -0,21 | 0,845218636 |
| Gzmm   | -0,08 | 0,898572877 | 0,3   | 0,792112243 | 0     | 0,998479176 | -0,86 | 0,327860008 | -0,68 | 0,530072156 |
| Gzmn   | 0,03  | 0,966775766 | -0,61 | 0,691058901 | -0,67 | 0,465949919 | 0,59  | 0,699241026 | 0,5   | 0,720844381 |
| H13    | 0,18  | 0,727127205 | 0,38  | 0,600167407 | -0,19 | 0,760075811 | 0,61  | 0,207715381 | 0,94  | 0,075700236 |
| H19    | 0,36  | 0,631796741 | -0,75 | 0,472042875 | 0,39  | 0,621385343 | 1,08  | 0,260734886 | -0,31 | 0,781860531 |
| H1f0   | -0,22 | 0,589181066 | 0,11  | 0,810418074 | 0,44  | 0,271623872 | -0,84 | 0,047192379 | -0,4  | 0,450543672 |
| H1fnt  | 0,19  | 0,661945783 | -0,09 | 0,907136328 | -0,07 | 0,911634383 | 0,16  | 0,751826661 | 0,01  | 0,992890723 |
| H1foo  | 0,38  | 0,548566229 | -0,44 | 0,49941722  | -0,18 | 0,779486228 | 0,6   | 0,265195336 | 0,12  | 0,851207222 |
| H1fx   | -0,02 | 0,978853388 | -0,03 | 0,954378914 | 0,01  | 0,992972594 | -0,05 | 0,930116111 | -0,26 | 0,694233384 |
| H2-Aa  | 1,09  | 0,491150313 | 2,12  | 0,0802723   | -4,24 | 0,000653486 | -1,74 | 0,021530367 | 1,59  | 0,01012797  |

|          |       |             |       |             |       |             |       |             |       |             |
|----------|-------|-------------|-------|-------------|-------|-------------|-------|-------------|-------|-------------|
| H2-Ab1   | 1,02  | 0,449740126 | 1,85  | 0,076025247 | -3,51 | 2,76692E-05 | -1,43 | 0,030593384 | 1,07  | 0,037726966 |
| H2afb1   | 0,35  | 0,405822217 | -0,1  | 0,847821325 | 0     | 0,99879674  | 0,12  | 0,810508503 | 0,69  | 0,205947991 |
| H2afb2   | 0,22  | 0,568593522 | 0,13  | 0,790939978 | 0     | 0,997220401 | 0,11  | 0,771144265 | -0,22 | 0,74624632  |
| H2afj    | -0,07 | 0,923500418 | 0,23  | 0,702517334 | 0,1   | 0,899913569 | -0,16 | 0,731911621 | -0,15 | 0,84597948  |
| H2afv    | 0,06  | 0,921032905 | -0,38 | 0,412008994 | 0,52  | 0,506787649 | -0,61 | 0,088393639 | -0,1  | 0,88762419  |
| H2afx    | -0,6  | 0,22857298  | -0,72 | 0,109267475 | 0,67  | 0,140889351 | 0,36  | 0,346825441 | 0,15  | 0,833004931 |
| H2afy    | -0,33 | 0,520609641 | 0,05  | 0,935984823 | -0,16 | 0,818205188 | 0,39  | 0,431801951 | 0,59  | 0,290947419 |
| H2afy2   | -0,3  | 0,702313432 | -0,23 | 0,882589938 | -0,69 | 0,291949275 | -0,59 | 0,528233172 | 0,11  | 0,947437555 |
| H2afy3   | 0,18  | 0,732890895 | 0,1   | 0,853569707 | -0,09 | 0,873740233 | 0     | 1           | 0,1   | 0,906031862 |
| H2afz    | -0,24 | 0,492894586 | -0,54 | 0,410501758 | 0,29  | 0,679004022 | 0,33  | 0,489892794 | -0,08 | 0,939464844 |
| H2bfm    | -0,54 | 0,220360859 | -0,1  | 0,928497302 | 0,17  | 0,841563482 | 0,4   | 0,498825358 | -0,01 | 0,991977803 |
| H2-D1    | 0,44  | 0,534017117 | 0,29  | 0,493525791 | -0,45 | 0,235612389 | -0,11 | 0,803994085 | 0,27  | 0,593128727 |
| H2-DMa   | 1,75  | 0,275938194 | 2,51  | 0,040620931 | -3,91 | 2,76692E-05 | -1,37 | 0,027653421 | 2,17  | 0,003659564 |
| H2-DMb1  | 1,09  | 0,504407333 | 1,87  | 0,048125366 | -2,49 | 0,00016763  | -1,06 | 0,031574061 | 1,2   | 0,027086215 |
| H2-DMb2  | 1,76  | 0,206370928 | 2,43  | 0,100303734 | -3,77 | 0,007597529 | -0,45 | 0,794165367 | 3,12  | 0,100639823 |
| H2-Ea-ps | 0,24  | 0,669841006 | -0,14 | 0,852461907 | -0,06 | 0,934354994 | 0,28  | 0,404975379 | 0,03  | 0,97425848  |
| H2-Eb1   | 1,2   | 0,38092461  | 2,03  | 0,152199284 | -2,71 | 0,003185496 | -1,01 | 0,185393534 | 2,08  | 0,010449134 |
| H2-Eb2   | 0,18  | 0,738714467 | 0,48  | 0,257624607 | -0,3  | 0,700061351 | -0,02 | 0,986085157 | 1,03  | 0,137616828 |
| H2-K1    | 0,6   | 0,48027777  | 0,23  | 0,574767565 | -0,83 | 0,064246958 | 0,1   | 0,779181428 | 0,38  | 0,415499617 |
| H2-K2    | 0,42  | 0,447271895 | 0,84  | 0,4666291   | -0,88 | 0,290123118 | -0,32 | 0,71158821  | 0,77  | 0,161333807 |
| H2-Ke6   | -0,01 | 0,992058402 | 0,59  | 0,460241239 | -0,19 | 0,864691151 | -1,47 | 0,043583743 | -0,43 | 0,391282293 |
| H2-M1    | -0,07 | 0,942440481 | 0,17  | 0,781344808 | -0,25 | 0,702677589 | -0,14 | 0,875265854 | -0,05 | 0,961683196 |
| H2-M10.1 | 0,08  | 0,943727523 | 0,2   | 0,783325809 | -0,06 | 0,940550094 | -0,4  | 0,664507481 | 0,23  | 0,846205023 |
| H2-M10.2 | 0,06  | 0,949746861 | -0,3  | 0,634760506 | -0,25 | 0,777417583 | 0,04  | 0,970425932 | -0,08 | 0,941858285 |
| H2-M10.3 | 0     | 0,999536558 | -0,2  | 0,831404974 | -0,13 | 0,888377256 | 0,86  | 0,221130864 | 0,23  | 0,808178104 |
| H2-M10.4 | 0,04  | 0,965482773 | 0,16  | 0,73274163  | 0,05  | 0,96408491  | -0,31 | 0,428295778 | -0,35 | 0,51891273  |
| H2-M10.5 | 0,22  | 0,633284194 | -0,14 | 0,823246376 | -0,44 | 0,426899591 | -0,17 | 0,821094483 | 0,32  | 0,730298091 |
| H2-M10.6 | -0,07 | 0,902911274 | -0,24 | 0,568282579 | 0,15  | 0,823823322 | 0,22  | 0,680497621 | 0,01  | 0,992694729 |
| H2-M11   | -0,2  | 0,71347786  | -0,12 | 0,854940418 | -0,2  | 0,727262258 | 0,23  | 0,772462401 | 0,76  | 0,246245872 |
| H2-M2    | 0,5   | 0,453318919 | -0,32 | 0,767178812 | -0,38 | 0,473499244 | -0,02 | 0,972627967 | -0,01 | 0,992283223 |
| H2-M3    | 0,49  | 0,416909288 | 0,98  | 0,158696948 | -0,95 | 0,03593925  | -0,27 | 0,744237266 | 1,73  | 0,015389935 |
| H2-M5    | 0,39  | 0,416201922 | 0,07  | 0,927855209 | 0,15  | 0,827761588 | 0,22  | 0,480111634 | 0,54  | 0,290408674 |
| H2-M9    | -0,24 | 0,832696131 | -0,4  | 0,664787536 | 0,32  | 0,610313044 | 0,41  | 0,339289548 | -0,21 | 0,735052158 |
| H2-Oa    | -0,16 | 0,841140165 | 0,05  | 0,926157704 | -0,39 | 0,366234911 | 0,24  | 0,48505774  | -0,14 | 0,827032122 |
| H2-Ob    | -0,77 | 0,594739156 | 0,34  | 0,540495893 | -0,11 | 0,920158784 | -1,72 | 0,014643161 | 0,91  | 0,116694427 |

|        |       |             |       |             |       |             |       |             |       |             |
|--------|-------|-------------|-------|-------------|-------|-------------|-------|-------------|-------|-------------|
| H2-Pb  | -0,11 | 0,876019664 | 0,23  | 0,674468926 | 0,27  | 0,702677589 | 0,1   | 0,878760462 | 0,49  | 0,389664866 |
| H2-Q1  | -0,58 | 0,149941264 | 0,07  | 0,913622205 | -0,13 | 0,856605654 | 0,11  | 0,874607411 | -0,08 | 0,934398907 |
| H2-Q10 | 0,72  | 0,311316821 | 0,22  | 0,806456132 | -0,61 | 0,242790302 | 0,13  | 0,849242587 | 0,37  | 0,609586099 |
| H2-Q2  | -0,13 | 0,879672102 | -0,31 | 0,529278426 | 0,2   | 0,852407397 | 0,02  | 0,978803096 | -0,11 | 0,906876904 |
| H2-Q4  | 1,25  | 0,178589155 | 0,63  | 0,519623007 | -0,71 | 0,180608933 | -0,25 | 0,656052937 | 0,88  | 0,059753928 |
| H2-Q5  | 0,4   | 0,460103183 | 0,19  | 0,696160257 | -0,36 | 0,404120029 | 0,04  | 0,920640884 | 0,4   | 0,397481272 |
| H2-T10 | 0,88  | 0,551572626 | 0,94  | 0,304034247 | -0,61 | 0,542385406 | -0,01 | 0,996074006 | 1,21  | 0,130592827 |
| H2-T23 | 1,32  | 0,085844621 | 1,29  | 0,190009472 | -1,67 | 0,00990492  | -0,81 | 0,337938676 | 1,94  | 0,017540137 |
| H2-T24 | 1,05  | 0,231191495 | 1,32  | 0,10752682  | -2,81 | 0,002978188 | -2,16 | 0,01321417  | 1,22  | 0,063668153 |
| H2-T3  | 0,12  | 0,896249068 | 0,37  | 0,753679288 | -0,76 | 0,503819492 | 0,38  | 0,526816059 | 0,29  | 0,598963515 |
| H3f3a  | 0,03  | 0,959466597 | -0,13 | 0,878240984 | -0,26 | 0,800142198 | -0,22 | 0,657852826 | -0,25 | 0,745134899 |
| H3f3b  | 0,51  | 0,298771977 | 1,05  | 0,2014299   | -0,19 | 0,849697489 | -0,29 | 0,825258543 | 0,75  | 0,49692586  |
| H60b   | -0,87 | 0,279256257 | -0,73 | 0,686540452 | 1,25  | 0,112229182 | 2,37  | 0,015034344 | -0,08 | 0,950021061 |
| H60c   | 0,18  | 0,758136438 | 0,07  | 0,887493001 | -0,03 | 0,981188621 | 0,04  | 0,95852873  | -0,14 | 0,912250982 |
| H6pd   | -0,68 | 0,472759457 | -0,63 | 0,38334636  | -0,32 | 0,719386001 | -0,17 | 0,628399455 | -0,69 | 0,119856586 |
| Haa0   | -0,22 | 0,713609161 | 0,06  | 0,887889466 | 0     | 0,999931921 | -0,07 | 0,911831177 | 0,15  | 0,8632693   |
| Habp2  | -0,58 | 0,218933879 | 0,42  | 0,56691167  | -0,12 | 0,899629874 | -0,37 | 0,5859782   | 0,07  | 0,960974478 |
| Habp4  | -0,75 | 0,520240053 | -0,13 | 0,908926157 | -0,3  | 0,624967247 | -0,98 | 0,186877063 | -0,44 | 0,4940585   |
| Hacd1  | -0,09 | 0,948926586 | 0,11  | 0,869734155 | -0,4  | 0,61483831  | 2,22  | 0,028363085 | 0,29  | 0,806246741 |
| Hacd2  | 0,23  | 0,576406658 | -0,22 | 0,734207194 | 0,01  | 0,993379272 | -0,27 | 0,550483161 | -0,02 | 0,982634575 |
| Hacd3  | -0,26 | 0,805438081 | 0,05  | 0,9860901   | 0,71  | 0,413379282 | -0,71 | 0,50727769  | -0,5  | 0,450994608 |
| Hacd4  | -1,09 | 0,277122572 | 0,12  | 0,919587364 | -0,28 | 0,849635871 | -2,21 | 0,012175785 | -0,06 | 0,97425848  |
| Hace1  | -0,33 | 0,646090784 | -0,2  | 0,936414321 | 0,89  | 0,253176605 | 0,32  | 0,642212952 | 0,43  | 0,587915673 |
| Hacl1  | -0,22 | 0,840654169 | 0,09  | 0,970762922 | -0,29 | 0,804607903 | -0,47 | 0,222930343 | -0,97 | 0,058861181 |
| Hadh   | -0,65 | 0,222236104 | -0,74 | 0,183377483 | 0,38  | 0,867580642 | -0,43 | 0,32544186  | -0,88 | 0,137394562 |
| Hadha  | -0,28 | 0,628802144 | 0,05  | 0,961370411 | 0,36  | 0,568984164 | 0,28  | 0,521355444 | -0,08 | 0,937558003 |
| Hagh   | 0,05  | 0,928103232 | 0,38  | 0,599538386 | 0,34  | 0,577363882 | -0,02 | 0,980875042 | 0,2   | 0,780399837 |
| Haghl  | -0,5  | 0,624941638 | -1,03 | 0,128834111 | 0,15  | 0,899292348 | -0,3  | 0,610809424 | -0,5  | 0,426268155 |
| Haglr  | 0,12  | 0,841140165 | 0,29  | 0,742043497 | -0,09 | 0,942112992 | -0,05 | 0,961223036 | 0,13  | 0,841449069 |
| Hal    | 0,03  | 0,970078059 | 0,36  | 0,664787536 | -0,03 | 0,982305856 | -1,03 | 0,210937201 | -0,74 | 0,450944522 |
| Halr1  | -1,23 | 0,077161113 | -0,95 | 0,268436493 | 1,2   | 0,260200895 | 1,71  | 0,015034344 | 0,16  | 0,917110997 |
| Hamp   | 0,17  | 0,768809729 | 0,05  | 0,93451524  | -0,11 | 0,890249935 | -0,13 | 0,74558962  | 0,04  | 0,963377414 |
| Hamp2  | 0,03  | 0,992058402 | 0,39  | 0,642845417 | -1,32 | 0,088950678 | 0,07  | 0,953222061 | -0,02 | 0,991559961 |
| Hand1  | 0,29  | 0,675389782 | -0,07 | 0,910193022 | -0,08 | 0,950725218 | -0,65 | 0,241597107 | -0,43 | 0,545351562 |
| Hand2  | 0,4   | 0,349043179 | -0,19 | 0,695689103 | 0     | 0,997268369 | 0,2   | 0,557215591 | 0,2   | 0,775753249 |



|         |       |             |       |             |       |             |       |             |       |             |
|---------|-------|-------------|-------|-------------|-------|-------------|-------|-------------|-------|-------------|
| Hao1    | 0,19  | 0,811459272 | 0,32  | 0,804311994 | -0,53 | 0,473262143 | 0,55  | 0,31191739  | 0,08  | 0,952811332 |
| Hao2    | 0,12  | 0,810308706 | 0,23  | 0,732847182 | -0,31 | 0,642603225 | -1,39 | 0,157755101 | -0,09 | 0,959573673 |
| Hap1    | 0,28  | 0,602735958 | 0,39  | 0,713374802 | 0,04  | 0,968393958 | -0,88 | 0,250777195 | 1,24  | 0,061771487 |
| Hapln1  | 0,26  | 0,463897981 | 0,02  | 0,989873399 | -0,2  | 0,743653977 | -0,34 | 0,662721978 | -0,13 | 0,929312654 |
| Hapln2  | 0,02  | 0,983516046 | 0,28  | 0,710407859 | -0,24 | 0,622546805 | 0,11  | 0,892016971 | 0,27  | 0,739121045 |
| Hapln3  | -0,14 | 0,795659022 | 0,15  | 0,935041212 | 0,2   | 0,673524727 | -0,45 | 0,389444432 | -0,29 | 0,755982506 |
| Hapln4  | -0,25 | 0,764549689 | -0,23 | 0,910203909 | -0,59 | 0,302861841 | -0,18 | 0,782526829 | -0,19 | 0,823776279 |
| Harbi1  | -0,15 | 0,8634587   | -0,15 | 0,892869412 | 0,27  | 0,72066129  | -0,07 | 0,937855929 | 0,02  | 0,990091016 |
| Hars    | -0,92 | 0,19999698  | -0,14 | 0,850048209 | 0,37  | 0,644698879 | 0,77  | 0,201102308 | 0,11  | 0,928014634 |
| Hars2   | 0,08  | 0,952911315 | -0,24 | 0,855461386 | 0,91  | 0,07609377  | 0,31  | 0,746728153 | 0,03  | 0,981079016 |
| Has1    | -0,05 | 0,923707553 | -0,14 | 0,807100558 | 0,08  | 0,957552304 | -0,32 | 0,490176405 | -0,31 | 0,616321633 |
| Has2    | 0,08  | 0,947577073 | 0,08  | 0,932292974 | 0,56  | 0,541363142 | 0,05  | 0,921929178 | 0,46  | 0,37287699  |
| Has2os  | -0,02 | 0,989784447 | 0,09  | 0,851085879 | 0,12  | 0,914134206 | 0,04  | 0,972879932 | -0,29 | 0,671838073 |
| Has3    | 0,22  | 0,636879263 | -0,07 | 0,947107147 | -0,07 | 0,925417014 | -1,28 | 0,211107876 | -0,73 | 0,214182238 |
| Hat1    | -0,75 | 0,097395165 | -0,7  | 0,508633526 | 0,74  | 0,199678278 | 0,88  | 0,117192962 | 0,13  | 0,859663155 |
| Haus1   | -0,74 | 0,260634235 | -1,4  | 0,362196769 | 1,43  | 0,197579894 | 0,61  | 0,570512694 | -0,37 | 0,527815148 |
| Haus2   | 0,27  | 0,740529913 | -0,23 | 0,817367084 | -0,35 | 0,706714392 | 0,5   | 0,430977925 | -0,09 | 0,961749007 |
| Haus3   | -0,33 | 0,613990129 | -0,43 | 0,556442436 | 0,15  | 0,871283127 | 0,86  | 0,446071963 | 0,57  | 0,662284041 |
| Haus4   | -0,34 | 0,520545783 | -0,69 | 0,465184328 | 0,78  | 0,300912962 | 1,01  | 0,215039864 | 0,13  | 0,912250982 |
| Haus5   | 0,23  | 0,765643907 | -1,02 | 0,363919957 | 1,02  | 0,130256376 | 0,45  | 0,621810528 | 0,54  | 0,46173543  |
| Haus6   | -1,1  | 0,214430522 | -0,95 | 0,743522861 | 1,87  | 0,038729282 | 0,99  | 0,377338868 | 0,25  | 0,878966527 |
| Haus7   | -1,14 | 0,26541494  | -0,69 | 0,405702807 | 0,9   | 0,475367327 | 0,75  | 0,298105176 | 0,16  | 0,886027227 |
| Haus8   | -0,04 | 0,960720096 | -0,18 | 0,801259805 | 0,04  | 0,967930981 | 0,25  | 0,695232035 | -0,06 | 0,955137605 |
| Havcr1  | -0,24 | 0,826457489 | 0,25  | 0,725431195 | -0,32 | 0,657226177 | -0,08 | 0,924492971 | -0,16 | 0,844265172 |
| Havcr2  | -0,13 | 0,792238061 | -0,13 | 0,823246376 | 0,39  | 0,496229642 | -0,41 | 0,325923875 | -0,08 | 0,939948423 |
| Hax1    | 0,28  | 0,457905777 | -0,04 | 0,96237563  | 0,13  | 0,868609956 | 0,56  | 0,140053205 | 0,18  | 0,818041383 |
| Hba-a1  | 0,01  | 0,996998625 | 0,41  | 0,947684955 | 0,69  | 0,792813729 | -3,72 | 0,042479765 | -0,53 | 0,796668768 |
| Hba-a2  | 0,2   | 0,9231839   | 0,42  | 0,926157704 | 0,74  | 0,769390181 | -3,39 | 0,018624038 | -0,52 | 0,824725869 |
| Hba-x   | -0,06 | 0,945677516 | -0,5  | 0,200336704 | -0,75 | 0,215654416 | -0,16 | 0,832134224 | -0,83 | 0,199537078 |
| Hbb-b2  | 0,16  | 0,948926586 | 0,14  | 0,778730112 | 0,52  | 0,35431494  | -0,13 | 0,752184911 | 0,52  | 0,530072156 |
| Hbb-bh1 | -0,46 | 0,357054834 | 0,27  | 0,785573503 | -0,3  | 0,762462025 | 0     | 1           | 0,69  | 0,537590834 |
| Hbb-bh2 | 0,09  | 0,833900133 | -0,28 | 0,609576972 | 0,08  | 0,921956183 | 0,15  | 0,692483691 | 0,43  | 0,437625388 |
| Hbb-y   | 0,39  | 0,403765204 | 0,7   | 0,200674509 | -0,16 | 0,862628091 | 0,17  | 0,815271983 | 0,34  | 0,655956123 |
| Hbegf   | 0,63  | 0,104092085 | 0,63  | 0,340926832 | 0,42  | 0,375756922 | -0,68 | 0,117880643 | 0,41  | 0,389664866 |
| Hbp1    | 0,31  | 0,57641322  | -0,13 | 0,765325717 | -0,4  | 0,528322067 | 0,49  | 0,521355444 | 0,17  | 0,876927228 |

|         |       |             |       |             |       |             |       |             |       |             |
|---------|-------|-------------|-------|-------------|-------|-------------|-------|-------------|-------|-------------|
| Hbq1a   | 0,07  | 0,914090929 | -0,18 | 0,85726965  | -0,69 | 0,378741497 | 0,39  | 0,49234274  | 0,14  | 0,887392561 |
| Hbq1b   | 0,07  | 0,914868427 | -0,28 | 0,633905623 | -0,11 | 0,909717677 | 0,34  | 0,647783922 | 0     | 0,999775166 |
| Hbs1l   | -0,2  | 0,704720946 | 0,2   | 0,775155136 | 0,01  | 0,996322566 | 0,57  | 0,185481027 | 0,03  | 0,979152939 |
| Hc      | 0,42  | 0,430173798 | 0,13  | 0,790939978 | -0,78 | 0,343594254 | -0,07 | 0,923959343 | -0,53 | 0,442579293 |
| Hcar1   | 0,37  | 0,705284533 | -0,24 | 0,664787536 | -0,04 | 0,973732268 | -0,42 | 0,284374871 | -0,32 | 0,51509981  |
| Hcar2   | 0     | 0,999288019 | -0,29 | 0,642775877 | -0,7  | 0,782805427 | -0,02 | 0,986994543 | -0,08 | 0,932987835 |
| Hccs    | -0,34 | 0,676134358 | -0,05 | 0,958545812 | 0,22  | 0,769082893 | 0,69  | 0,105547956 | 0,15  | 0,861506431 |
| Hcfc1   | -0,11 | 0,895400682 | -0,44 | 0,344340083 | 0,3   | 0,695267849 | 0,27  | 0,382122662 | -0,15 | 0,797076526 |
| Hcfc1r1 | -0,26 | 0,687662951 | -0,14 | 0,885593556 | -0,34 | 0,684002106 | -0,24 | 0,759359621 | -0,62 | 0,4940585   |
| Hcfc2   | -0,27 | 0,679989164 | 0,16  | 0,881595712 | 0,69  | 0,370554673 | -0,22 | 0,797586874 | 0,05  | 0,96738578  |
| Hck     | 0,03  | 0,975949545 | 0,55  | 0,682256224 | 0,65  | 0,452872263 | 0,28  | 0,610564737 | 0,31  | 0,630186188 |
| Hcls1   | -0,22 | 0,625573018 | 0,07  | 0,907186434 | -0,09 | 0,903566012 | 1,56  | 0,018624038 | -0,3  | 0,647876293 |
| Hcn1    | -0,35 | 0,591279663 | 0,57  | 0,373555617 | 0,05  | 0,958053446 | -0,04 | 0,9624906   | -0,06 | 0,962528065 |
| Hcn2    | -0,31 | 0,520667704 | -0,3  | 0,487771533 | 0,61  | 0,261763372 | 0,63  | 0,215252719 | 0,2   | 0,843351909 |
| Hcn3    | -0,42 | 0,515770167 | -0,28 | 0,827228251 | -0,32 | 0,578272972 | 0,14  | 0,726795266 | -0,07 | 0,923040447 |
| Hcn4    | -0,55 | 0,421029929 | 0,08  | 0,950426904 | -0,08 | 0,950335957 | -0,59 | 0,11028862  | -0,79 | 0,096455532 |
| Hcrt    | -0,1  | 0,892823025 | 0,29  | 0,706671369 | -0,27 | 0,666008744 | -0,15 | 0,775865643 | -0,39 | 0,511300791 |
| Hcrtr1  | -0,01 | 0,993728727 | 0,15  | 0,88325516  | -0,45 | 0,412477493 | -0,01 | 0,993337409 | 0,73  | 0,214056891 |
| Hcrtr2  | -0,02 | 0,983663467 | -0,12 | 0,934280572 | -0,12 | 0,880706627 | -0,03 | 0,948141338 | 0,1   | 0,881968395 |
| Hcst    | -0,08 | 0,897717279 | -0,62 | 0,290306724 | -0,2  | 0,86459621  | 1,21  | 0,023771139 | -0,07 | 0,954118891 |
| Hdac1   | -0,48 | 0,189644465 | -0,23 | 0,602956592 | 1,21  | 0,132065448 | 0,28  | 0,469815368 | 0,09  | 0,91634585  |
| Hdac10  | -0,43 | 0,561414711 | -0,09 | 0,882847123 | -0,03 | 0,984879454 | -0,19 | 0,648610964 | -0,42 | 0,461371951 |
| Hdac11  | 0,2   | 0,634129153 | -0,04 | 0,963056015 | -0,21 | 0,811424918 | -0,78 | 0,064412141 | -0,32 | 0,693672681 |
| Hdac2   | -0,44 | 0,541417213 | -0,77 | 0,314703215 | 0,65  | 0,229067599 | 0,9   | 0,129284338 | 0,17  | 0,79248985  |
| Hdac3   | -0,74 | 0,089282283 | -0,17 | 0,849235875 | 0,3   | 0,592642641 | -0,14 | 0,85421134  | -0,43 | 0,654732327 |
| Hdac4   | 0,34  | 0,619127292 | 0,16  | 0,697863432 | -0,09 | 0,907617683 | 0,44  | 0,424955036 | 0,03  | 0,979456872 |
| Hdac5   | -0,51 | 0,319860017 | 0,1   | 0,937377463 | 0,18  | 0,805542835 | -0,76 | 0,097710906 | -0,26 | 0,677687906 |
| Hdac6   | -0,61 | 0,359251107 | -0,37 | 0,328485456 | 0,79  | 0,19907753  | 0,71  | 0,124162112 | -0,25 | 0,699060093 |
| Hdac7   | -0,56 | 0,310228398 | -0,25 | 0,669073556 | -0,06 | 0,941254389 | 0,06  | 0,874607411 | -0,27 | 0,615772692 |
| Hdac8   | 0,14  | 0,889978058 | 0,05  | 0,977204386 | 0,66  | 0,478503279 | 0,55  | 0,48767427  | 0,15  | 0,915238726 |
| Hdac9   | 0,41  | 0,553849378 | 0,04  | 0,975124205 | -0,31 | 0,791940256 | 2,26  | 0,0114029   | -0,09 | 0,951223734 |
| Hdc     | 1,37  | 0,123851261 | 1,97  | 0,051918634 | -1,34 | 0,175613994 | 0,23  | 0,613762949 | 1,45  | 0,010919606 |
| Hddc2   | -0,3  | 0,569188757 | -0,47 | 0,503791751 | 0,95  | 0,066430004 | 1,27  | 0,045809254 | -0,81 | 0,25383156  |
| Hddc3   | -0,6  | 0,488619512 | -0,42 | 0,690701372 | 0,48  | 0,732540375 | 0,03  | 0,977608888 | -0,47 | 0,599952054 |
| Hdgf    | -0,45 | 0,246943446 | -0,31 | 0,532539731 | 0,59  | 0,296072904 | 0,96  | 0,177649418 | 0,06  | 0,968124042 |

|          |       |             |       |             |       |             |       |             |       |             |
|----------|-------|-------------|-------|-------------|-------|-------------|-------|-------------|-------|-------------|
| Hdgfl1   | 0,07  | 0,898116888 | 0,07  | 0,883843639 | -0,07 | 0,935778422 | 0     | 1           | 0,2   | 0,864373858 |
| Hdgfrp2  | -0,17 | 0,751456663 | -0,26 | 0,606999442 | 0,06  | 0,936425237 | -0,11 | 0,805169421 | -0,22 | 0,710368081 |
| Hdgfrp3  | -0,09 | 0,932067554 | -0,01 | 0,995731719 | 0,08  | 0,950725218 | -1,05 | 0,09628786  | -0,01 | 0,9939542   |
| Hdhd1a   | 0,03  | 0,958535933 | -0,12 | 0,773156885 | -0,22 | 0,645388244 | 0,11  | 0,751826661 | -0,13 | 0,85041485  |
| Hdhd2    | -0,37 | 0,689767004 | -0,32 | 0,577622193 | 0,19  | 0,884493266 | -0,29 | 0,747440364 | -0,43 | 0,715721584 |
| Hdhd3    | -1,02 | 0,374225652 | 0,24  | 0,83322692  | 0,12  | 0,922318683 | 0,47  | 0,267041398 | -0,12 | 0,947300798 |
| Hdlbp    | -0,09 | 0,867243066 | -0,22 | 0,658349899 | 0,65  | 0,114276114 | 0,99  | 0,025060666 | -0,33 | 0,506870863 |
| Hdx      | 0,51  | 0,833489312 | 0,11  | 0,94021592  | 0,32  | 0,760930184 | 0,08  | 0,967866794 | 0,01  | 0,994659783 |
| Heatr1   | -0,51 | 0,256149238 | -0,48 | 0,649001924 | 0,29  | 0,579810168 | 1,12  | 0,039645631 | 0,26  | 0,765327693 |
| Heatr3   | -1,09 | 0,259797168 | -0,04 | 0,961370411 | 0,32  | 0,82804981  | 0,27  | 0,604842873 | -0,58 | 0,291856934 |
| Heatr4   | 0,1   | 0,866788377 | -0,09 | 0,841184864 | -0,07 | 0,923668578 | 0,26  | 0,443794356 | 0,26  | 0,716191367 |
| Heatr5a  | -0,12 | 0,865263482 | -0,21 | 0,812713089 | 0,29  | 0,687245138 | 0,65  | 0,248530936 | 0,16  | 0,88288747  |
| Heatr5b  | -0,3  | 0,646405965 | 0,06  | 0,936792848 | -0,65 | 0,142272657 | -0,13 | 0,722307071 | -0,28 | 0,581626555 |
| Heatr6   | -0,63 | 0,205216327 | 0,09  | 0,880473303 | -0,04 | 0,973732268 | 0,06  | 0,905087908 | -0,02 | 0,981439632 |
| Heatr9   | 1,44  | 0,037391759 | -0,02 | 0,989873399 | -0,39 | 0,679157998 | 0,02  | 0,977903166 | -0,11 | 0,949178165 |
| Hebp1    | -0,33 | 0,704720946 | -0,22 | 0,851206663 | -0,02 | 0,984879454 | -0,65 | 0,600412927 | -0,76 | 0,608004947 |
| Hebp2    | -0,12 | 0,874676538 | 0,1   | 0,88741189  | -0,02 | 0,985347628 | -0,84 | 0,126608574 | -0,77 | 0,395115041 |
| Heca     | -0,32 | 0,832696131 | -0,04 | 0,982786635 | 0,99  | 0,114280228 | -0,49 | 0,676581905 | -0,47 | 0,612498576 |
| Hectd1   | -0,4  | 0,271767062 | 0,08  | 0,891566803 | 0,22  | 0,741865177 | 0,22  | 0,563087342 | 0,12  | 0,859185944 |
| Hectd2   | 0,1   | 0,928770547 | 0,17  | 0,714081487 | -0,03 | 0,974887915 | -2,37 | 0,009316702 | 0,88  | 0,147999447 |
| Hectd3   | -0,71 | 0,337173147 | -0,18 | 0,811891069 | -0,03 | 0,976042637 | -0,25 | 0,680497621 | -0,32 | 0,764656525 |
| Hecw1    | 0,01  | 0,993175772 | -0,58 | 0,446315327 | 0,19  | 0,817048181 | 0,53  | 0,522767386 | 0,27  | 0,817758194 |
| Hecw2    | -1,25 | 0,097625832 | -1,46 | 0,094366643 | 0,51  | 0,497205965 | -2,47 | 0,009846116 | -1,21 | 0,036486741 |
| Heg1     | -0,75 | 0,110269018 | -0,54 | 0,250063761 | -0,07 | 0,928376443 | -0,73 | 0,068458322 | -0,45 | 0,328082125 |
| Helb     | -0,22 | 0,888623724 | -0,43 | 0,664502462 | 0,26  | 0,776930578 | -0,45 | 0,801037928 | -0,5  | 0,771500321 |
| Hells    | -2,16 | 0,129299808 | -1,6  | 0,31069547  | 1,18  | 0,27601225  | 2,7   | 0,071772884 | 0,13  | 0,962631948 |
| Helq     | -0,36 | 0,586458491 | -0,21 | 0,842793123 | 0,49  | 0,412643917 | -0,69 | 0,238788379 | -0,26 | 0,631201077 |
| Helt     | 0,07  | 0,929617282 | 0,06  | 0,926353869 | -0,22 | 0,735854281 | 0,04  | 0,943143586 | -0,32 | 0,608957273 |
| Helz     | -0,14 | 0,738077749 | -0,03 | 0,981214034 | 0,22  | 0,775163644 | -0,44 | 0,207674182 | -0,21 | 0,755594746 |
| Helz2    | 0,54  | 0,211628984 | 0,55  | 0,3321257   | -0,63 | 0,310532869 | -0,55 | 0,155086275 | 0,4   | 0,36183804  |
| Hemgn    | -0,41 | 0,604203249 | -0,04 | 0,987282412 | -0,25 | 0,750624323 | 0,2   | 0,75555577  | -0,07 | 0,956702425 |
| Hemk1    | 0,15  | 0,923500418 | -0,4  | 0,815791007 | -0,1  | 0,921956183 | -0,69 | 0,064024514 | -0,51 | 0,502903447 |
| Henmt1   | 0,38  | 0,480721497 | 0,22  | 0,693906911 | -0,13 | 0,898935616 | 0,2   | 0,646877366 | 0,4   | 0,459065492 |
| Hepacam  | 0,2   | 0,869565514 | -0,01 | 0,998923508 | 0,6   | 0,36121902  | -0,15 | 0,742291133 | 0,11  | 0,926844526 |
| Hepacam2 | 0,02  | 0,983663467 | -0,4  | 0,370515616 | 0,1   | 0,896181325 | 0,46  | 0,373645618 | -0,25 | 0,725587145 |

|        |       |             |       |             |       |             |       |             |       |             |
|--------|-------|-------------|-------|-------------|-------|-------------|-------|-------------|-------|-------------|
| Heph   | -0,97 | 0,190455459 | -0,12 | 0,871370631 | 0,12  | 0,904132011 | -0,23 | 0,628845246 | -0,31 | 0,622910734 |
| Heph11 | -0,01 | 0,982383659 | 0,25  | 0,696329013 | -0,18 | 0,838289412 | 0,09  | 0,892683296 | 0,07  | 0,949544475 |
| Herc1  | -0,53 | 0,180356049 | -0,04 | 0,956657797 | 0,41  | 0,599364835 | -0,66 | 0,083804647 | -0,18 | 0,752813867 |
| Herc2  | -0,21 | 0,666117459 | -0,14 | 0,778231289 | 0,35  | 0,460875038 | 0,01  | 0,980883383 | -0,43 | 0,326522052 |
| Herc3  | -0,29 | 0,683299822 | 0,08  | 0,944460866 | 0,32  | 0,751090942 | 0,24  | 0,748330544 | 0,05  | 0,954657649 |
| Herc4  | 0,09  | 0,9231839   | -0,12 | 0,880892852 | 0,24  | 0,878365741 | 0,01  | 0,996074006 | 0,26  | 0,830813323 |
| Herc6  | 1,46  | 0,123851261 | 1,32  | 0,06498412  | -1,48 | 0,011473367 | -0,39 | 0,405392375 | 1,51  | 0,014471757 |
| Herpu1 | -0,09 | 0,893137556 | -0,19 | 0,750378621 | 0,09  | 0,878636183 | -0,32 | 0,477211575 | -0,31 | 0,623770178 |
| Herpu2 | 0,07  | 0,939647483 | -0,08 | 0,869801707 | -0,06 | 0,952888594 | -0,19 | 0,619611108 | 0,06  | 0,947437555 |
| Hes1   | 0,04  | 0,959985598 | 0,03  | 0,95098509  | -0,3  | 0,58160408  | -0,01 | 0,992906132 | -0,11 | 0,916837154 |
| Hes2   | -0,03 | 0,959985598 | -0,27 | 0,65931908  | -0,14 | 0,829285065 | 0,46  | 0,235415565 | 0,25  | 0,773996551 |
| Hes3   | -0,29 | 0,688313545 | 0,19  | 0,767178812 | -0,37 | 0,584463665 | -0,41 | 0,539664524 | -0,43 | 0,608004947 |
| Hes5   | 0,25  | 0,773899768 | 0,23  | 0,662134711 | -0,23 | 0,786933951 | 0,32  | 0,618184044 | 0,64  | 0,257751018 |
| Hes6   | -0,4  | 0,585608908 | -0,29 | 0,56006264  | -0,13 | 0,937222375 | 0,17  | 0,831276028 | -0,39 | 0,673120647 |
| Hes7   | -0,33 | 0,705404186 | 0,13  | 0,891749049 | -0,05 | 0,947316802 | 0,01  | 0,989926105 | 0,05  | 0,958259949 |
| Hesx1  | -0,17 | 0,798244283 | 0,38  | 0,589733014 | -0,13 | 0,860094776 | -0,08 | 0,864335447 | -0,23 | 0,823098095 |
| Hexa   | 0,17  | 0,761120978 | 0,07  | 0,899624796 | 0     | 0,999931921 | -0,44 | 0,379646505 | -0,42 | 0,59705803  |
| Hexb   | -0,56 | 0,21284035  | -0,65 | 0,244905942 | 0,37  | 0,777417583 | -0,41 | 0,347503588 | -0,63 | 0,246316824 |
| Hexdc  | 0,17  | 0,867243066 | 0,34  | 0,559315429 | 0,32  | 0,58423234  | -0,41 | 0,505393299 | 0,17  | 0,852239561 |
| Hexim1 | -0,35 | 0,493024489 | 0,17  | 0,790939978 | -0,24 | 0,711678713 | -1,05 | 0,042033238 | -0,07 | 0,940438527 |
| Hexim2 | 0,11  | 0,907844906 | 0,12  | 0,866244292 | 0,26  | 0,839285215 | -0,42 | 0,609789473 | 0,16  | 0,93193727  |
| Hey1   | -0,99 | 0,173359555 | -0,62 | 0,178589032 | 0,57  | 0,343594254 | 1,03  | 0,025180579 | -0,55 | 0,217859301 |
| Hey2   | -0,88 | 0,096953827 | 0,07  | 0,927205716 | 0,04  | 0,980447951 | -2,9  | 0,01965347  | -0,19 | 0,818348287 |
| Heyl   | -0,19 | 0,867953985 | -0,04 | 0,982786635 | -0,69 | 0,302861841 | -1,08 | 0,208729417 | -0,52 | 0,707371312 |
| Hfe    | -0,3  | 0,520667704 | -0,08 | 0,870011115 | 0,22  | 0,918291931 | -0,68 | 0,252992148 | 0,34  | 0,654148631 |
| Hfe2   | 0,34  | 0,438315603 | -0,26 | 0,610418322 | 0,18  | 0,83818085  | 0,41  | 0,227430376 | 0,39  | 0,508679973 |
| Hfm1   | -0,09 | 0,895087252 | -0,18 | 0,858860016 | 0,16  | 0,759025368 | 0,09  | 0,898801714 | -0,32 | 0,608004947 |
| Hgd    | 0,58  | 0,14568937  | 0,28  | 0,630199793 | 0,08  | 0,962459789 | -0,95 | 0,420869535 | 0,71  | 0,699996356 |
| Hgf    | 0,17  | 0,908281692 | 0,01  | 0,99804971  | -0,86 | 0,684455958 | -0,58 | 0,263895667 | 0,56  | 0,457727631 |
| Hgfac  | 0,07  | 0,932531737 | -0,41 | 0,738199172 | 0,15  | 0,800162809 | 0,36  | 0,700603284 | 0,4   | 0,639071244 |
| Hgh1   | -0,57 | 0,318333634 | -0,43 | 0,615311543 | -0,04 | 0,969262382 | 0,51  | 0,420848492 | -0,03 | 0,978604922 |
| Hgs    | 0,02  | 0,978458035 | -0,25 | 0,626813483 | 0,01  | 0,988661889 | 0,08  | 0,866531336 | -0,43 | 0,534767398 |
| Hgsnat | -0,3  | 0,601066205 | -0,52 | 0,314703215 | -0,21 | 0,80546411  | -0,28 | 0,485770197 | -0,13 | 0,878966527 |
| Hhat   | -0,59 | 0,247582979 | 0,03  | 0,988548122 | 0,06  | 0,947460329 | 1,15  | 0,110770334 | 0,48  | 0,451817916 |
| Hhatl  | 0,01  | 0,993728727 | -0,62 | 0,24978864  | -0,15 | 0,884898822 | 0,4   | 0,329095126 | 0,2   | 0,78369432  |

|          |       |             |       |             |       |             |       |             |       |             |
|----------|-------|-------------|-------|-------------|-------|-------------|-------|-------------|-------|-------------|
| Hhex     | -0,05 | 0,929634271 | 0,29  | 0,818889977 | -0,29 | 0,723002297 | -0,57 | 0,139364198 | 0,05  | 0,960108878 |
| Hhip     | 0,01  | 0,991216662 | -0,08 | 0,900801202 | -0,21 | 0,719216409 | 0,24  | 0,529943394 | 0,03  | 0,976743304 |
| Hhipl1   | -0,21 | 0,764288636 | 0,04  | 0,977480225 | -0,33 | 0,68493217  | 0,33  | 0,467341604 | 0,06  | 0,956610289 |
| Hhipl2   | -0,08 | 0,912927186 | 0,2   | 0,720902851 | 0,33  | 0,638965268 | 0,06  | 0,931624956 | 0,14  | 0,932742551 |
| Hhla1    | 0,18  | 0,800851935 | 0,38  | 0,527551713 | 0,15  | 0,848089506 | 0,14  | 0,830016199 | 0,01  | 0,991437885 |
| Hibadh   | 0,29  | 0,528481893 | 0,26  | 0,70840705  | 0,79  | 0,113282308 | 0,52  | 0,367629005 | 0,27  | 0,697757911 |
| Hibch    | -0,17 | 0,823375501 | 0,11  | 0,959837002 | -1,01 | 0,326622843 | -0,86 | 0,298567611 | -0,7  | 0,432754761 |
| Hic1     | -0,35 | 0,367055976 | 0,17  | 0,734207194 | -0,31 | 0,688643408 | -0,04 | 0,945796985 | -0,03 | 0,975441362 |
| Hic2     | -0,09 | 0,886733721 | -0,29 | 0,646170664 | -0,26 | 0,732540375 | 0,93  | 0,201761604 | 0,23  | 0,815560342 |
| Hid1     | -0,61 | 0,513412557 | -0,56 | 0,277253387 | 0,59  | 0,180209764 | 0,5   | 0,293041603 | -0,71 | 0,271713687 |
| Hif1a    | 0,31  | 0,639070738 | 0,49  | 0,47154257  | -0,22 | 0,751201307 | 1,79  | 0,059380043 | 1,01  | 0,25400564  |
| Hif1an   | -0,29 | 0,772692695 | -0,37 | 0,556926763 | -0,62 | 0,661747229 | -0,22 | 0,922740736 | -0,04 | 0,988084587 |
| Hif3a    | -0,04 | 0,963914207 | 0,26  | 0,620236896 | 0,18  | 0,805783058 | -1,54 | 0,021364404 | -0,74 | 0,16021172  |
| Higd1a   | 0,42  | 0,714662474 | 0,6   | 0,367968212 | 0,25  | 0,856605654 | -1,38 | 0,022717339 | -0,31 | 0,657070737 |
| Higd1b   | -0,13 | 0,936611783 | 0,41  | 0,730602188 | 0,04  | 0,979791644 | -1,89 | 0,083401972 | -1,09 | 0,241922199 |
| Higd1c   | -0,1  | 0,915995296 | -0,08 | 0,95098509  | -0,11 | 0,949912807 | -0,78 | 0,065102444 | 0,15  | 0,894994241 |
| Higd2a   | -0,09 | 0,836107067 | -0,11 | 0,855632384 | 0,17  | 0,777568498 | 0,09  | 0,808837082 | -0,22 | 0,680015121 |
| Hilpda   | 0,5   | 0,356646108 | 0,14  | 0,786074087 | -0,22 | 0,795284337 | 1,49  | 0,063503394 | 0,49  | 0,525943742 |
| Hils1    | 0,14  | 0,884190046 | 0,16  | 0,744554105 | -0,32 | 0,578720052 | 0,31  | 0,493485636 | 0,24  | 0,681236353 |
| Hinfp    | -0,04 | 0,955321816 | -0,19 | 0,774278866 | 0,38  | 0,566099777 | 0,19  | 0,606018577 | -0,08 | 0,940149515 |
| Hint1    | 0,13  | 0,846313357 | -0,13 | 0,867265251 | 0,42  | 0,720069267 | 0,58  | 0,169294819 | 0,25  | 0,647876293 |
| Hint2    | -0,17 | 0,874146026 | 0,26  | 0,795638071 | -0,17 | 0,885556448 | -0,36 | 0,676020276 | 0,09  | 0,938113617 |
| Hint3    | 0,3   | 0,647003942 | 0     | 0,999210601 | -0,12 | 0,899913569 | -0,57 | 0,324668198 | -0,57 | 0,541434584 |
| Hip1     | -0,29 | 0,437752462 | -0,22 | 0,619807116 | -0,35 | 0,500343254 | -0,13 | 0,793099857 | -0,69 | 0,161829331 |
| Hip1r    | 0,22  | 0,630710347 | -0,07 | 0,898238238 | 0,7   | 0,230312268 | -0,35 | 0,274415093 | -0,15 | 0,830263037 |
| Hipk1    | 0,14  | 0,750362144 | 0,15  | 0,783487161 | -0,04 | 0,950846671 | 0,28  | 0,465689693 | 0,09  | 0,910083563 |
| Hipk2    | 0,33  | 0,37178952  | -0,26 | 0,810418074 | 0,2   | 0,830639813 | -2,08 | 0,004331967 | -0,72 | 0,17552122  |
| Hipk3    | 0,06  | 0,912510949 | 0,22  | 0,598211927 | 0,11  | 0,886832708 | 0     | 0,998889125 | 0,09  | 0,911850421 |
| Hipk4    | 0,07  | 0,930710746 | -0,33 | 0,666450149 | -0,07 | 0,953007693 | -0,43 | 0,477893307 | -0,31 | 0,763240477 |
| Hira     | -0,3  | 0,43904576  | -0,1  | 0,842953835 | 0,36  | 0,637321546 | -0,08 | 0,865438496 | -0,14 | 0,85374902  |
| Hirip3   | -0,39 | 0,666546952 | -1,16 | 0,314703215 | 0,62  | 0,374422909 | 0,04  | 0,975942947 | -0,54 | 0,62978577  |
| Hist1h1a | -0,7  | 0,356810943 | -1,14 | 0,52288353  | 0,01  | 0,996286252 | 0,69  | 0,604479227 | -0,28 | 0,840515079 |
| Hist1h1b | -0,35 | 0,727387897 | -1,22 | 0,26375548  | 0,22  | 0,796904065 | 1,09  | 0,044714575 | 0     | 0,996614425 |
| Hist1h1c | -0,55 | 0,614250688 | -0,76 | 0,489673761 | 0,95  | 0,119651536 | 0,4   | 0,714192544 | -0,62 | 0,618416921 |
| Hist1h1d | 0,02  | 0,973083012 | -0,59 | 0,526182879 | 0,13  | 0,86935713  | 0,66  | 0,335879418 | 0     | 0,998184923 |

|           |       |             |       |             |       |             |       |             |       |             |
|-----------|-------|-------------|-------|-------------|-------|-------------|-------|-------------|-------|-------------|
| Hist1h1e  | 0,21  | 0,888652674 | -0,09 | 0,907271658 | -0,11 | 0,920158784 | -0,67 | 0,224725482 | 0,06  | 0,978604922 |
| Hist1h1t  | -0,18 | 0,659879365 | -0,12 | 0,900353548 | -0,07 | 0,926974012 | 0,22  | 0,695515516 | -0,04 | 0,965244101 |
| Hist1h2aa | 0,02  | 0,986007156 | -0,15 | 0,870989562 | 0,23  | 0,715497532 | 0,11  | 0,806497386 | 0,05  | 0,961251206 |
| Hist1h2ab | -1,32 | 0,180862229 | -1,32 | 0,136079737 | 1,79  | 0,060717312 | 1,56  | 0,056256478 | -0,18 | 0,895756587 |
| Hist1h2ac | -1,39 | 0,501334077 | -1,43 | 0,436556718 | 0,64  | 0,665727181 | 2,28  | 0,068715175 | -0,34 | 0,716229308 |
| Hist1h2ad | 0,06  | 0,936611783 | -0,1  | 0,842824184 | 0,17  | 0,76370647  | 0,14  | 0,754339703 | -0,05 | 0,95985938  |
| Hist1h2ae | 0,08  | 0,859600103 | -0,02 | 0,976930161 | 0,07  | 0,932577939 | 0,08  | 0,865875627 | -0,03 | 0,967860497 |
| Hist1h2af | -0,98 | 0,071264046 | -1,05 | 0,153524445 | 0,66  | 0,218714399 | 0,81  | 0,123961932 | 0,08  | 0,932268703 |
| Hist1h2ag | -0,12 | 0,859600103 | -0,25 | 0,916042399 | -0,07 | 0,94110925  | 0,87  | 0,566556011 | 0,16  | 0,875906643 |
| Hist1h2ah | -0,28 | 0,662416763 | -0,26 | 0,6102591   | 0,11  | 0,845993227 | 0,3   | 0,336157031 | 0,16  | 0,832848337 |
| Hist1h2ai | 0,03  | 0,963914207 | -0,01 | 0,983071427 | -0,16 | 0,934444634 | 0,31  | 0,490200621 | 0,28  | 0,753328965 |
| Hist1h2ak | -1,61 | 0,14232546  | -1,54 | 0,279092572 | 1,11  | 0,305677184 | 0,35  | 0,885417869 | -1,25 | 0,505953896 |
| Hist1h2al | -0,12 | 0,838892004 | 0,2   | 0,692139075 | -0,03 | 0,965656549 | -0,29 | 0,445793157 | -0,08 | 0,906031862 |
| Hist1h2an | -1,09 | 0,049493804 | -1,1  | 0,151759507 | 0,88  | 0,054936135 | 1,16  | 0,08634305  | -0,2  | 0,839474287 |
| Hist1h2ba | -0,11 | 0,808947569 | 0     | 1           | 0,16  | 0,751758339 | -0,04 | 0,924164344 | -0,1  | 0,890833196 |
| Hist1h2bb | -1,75 | 0,01522448  | -2,72 | 0,064349816 | 1,91  | 0,063243606 | 3,05  | 0,01346145  | -1,18 | 0,223300909 |
| Hist1h2bc | 0,72  | 0,104793898 | 0,28  | 0,518494408 | -0,53 | 0,474517891 | -0,76 | 0,069200958 | -0,55 | 0,365076851 |
| Hist1h2be | 0,34  | 0,697356307 | 0,12  | 0,807175471 | -0,74 | 0,500343254 | -0,71 | 0,350852228 | 0,38  | 0,741220671 |
| Hist1h2bf | -1,24 | 0,149941264 | -1,9  | 0,249103754 | 1,46  | 0,086991079 | 1,82  | 0,114764321 | -0,6  | 0,417370658 |
| Hist1h2bg | -0,31 | 0,766898048 | -0,29 | 0,781665479 | 0,37  | 0,859411859 | -1,15 | 0,046473133 | -1,39 | 0,151027273 |
| Hist1h2bh | -0,2  | 0,606922012 | 0,01  | 0,994137877 | -0,06 | 0,961464515 | -0,16 | 0,812652379 | -0,26 | 0,827032122 |
| Hist1h2bk | -0,91 | 0,471980619 | -1,12 | 0,325242663 | 0,68  | 0,542758274 | 1,05  | 0,243226517 | -0,18 | 0,908150401 |
| Hist1h2bm | 0,16  | 0,779331628 | 0,16  | 0,700951495 | 0,03  | 0,970673334 | -0,17 | 0,713260063 | -0,01 | 0,992694729 |
| Hist1h2bp | 0,26  | 0,84900712  | -0,44 | 0,674709201 | 0,35  | 0,543175353 | 0,03  | 0,947536845 | -0,02 | 0,988084587 |
| Hist1h2br | 0,26  | 0,562609036 | -0,38 | 0,586721336 | 0,05  | 0,95976212  | 0,19  | 0,873610553 | -0,09 | 0,952989255 |
| Hist1h3a  | -0,11 | 0,895870455 | 0     | 1           | 0     | 0,999571656 | -1,49 | 0,348565724 | -0,26 | 0,926943218 |
| Hist1h3b  | -0,7  | 0,189158005 | -0,58 | 0,20333065  | 0,33  | 0,758100692 | 0,31  | 0,442100679 | 0,03  | 0,981677577 |
| Hist1h3c  | -0,54 | 0,263040496 | -0,07 | 0,893042815 | -0,97 | 0,461388668 | -0,77 | 0,391327185 | -0,74 | 0,332820338 |
| Hist1h3d  | 0,24  | 0,777335496 | -0,58 | 0,333537535 | 0,38  | 0,907580464 | -0,09 | 0,965734988 | -0,8  | 0,571269331 |
| Hist1h3f  | 0,22  | 0,719547217 | 0,16  | 0,870989562 | -0,35 | 0,721639169 | -0,62 | 0,382751556 | 0,59  | 0,349150128 |
| Hist1h3g  | -0,23 | 0,593543001 | -0,24 | 0,825662099 | 0,44  | 0,527689832 | 0,35  | 0,528086852 | 0,03  | 0,97425848  |
| Hist1h3h  | -0,45 | 0,319925488 | -1,14 | 0,152328045 | 0,51  | 0,260479447 | 0,95  | 0,088655398 | 0,06  | 0,949544475 |
| Hist1h3i  | 0,35  | 0,38677029  | -0,23 | 0,893952182 | -0,04 | 0,978877446 | 0,07  | 0,938689944 | 0,59  | 0,593298551 |
| Hist1h4a  | -0,51 | 0,247894069 | 0,36  | 0,740618526 | -0,41 | 0,589982818 | -0,63 | 0,740451724 | 0,5   | 0,823191628 |
| Hist1h4b  | 0,01  | 0,990404752 | 0,02  | 0,976594855 | -0,57 | 0,305273726 | -0,16 | 0,700126136 | 0,37  | 0,706623272 |

|              |       |             |       |             |       |             |       |             |       |             |
|--------------|-------|-------------|-------|-------------|-------|-------------|-------|-------------|-------|-------------|
| Hist1h4c     | -0,12 | 0,93115708  | 0,75  | 0,585336048 | -0,49 | 0,584456821 | -0,95 | 0,047050938 | 0,27  | 0,757239026 |
| Hist1h4f     | -0,12 | 0,792328154 | 0,05  | 0,972150454 | -0,49 | 0,527929204 | 0,29  | 0,58874149  | 0,04  | 0,96738578  |
| Hist1h4h     | 0,46  | 0,242987368 | 0,61  | 0,446315327 | -0,74 | 0,569619692 | -0,8  | 0,277759687 | 0,66  | 0,395349481 |
| Hist1h4i     | 0,3   | 0,523296087 | -0,38 | 0,430081562 | -0,3  | 0,809137779 | -0,01 | 0,994034395 | -0,48 | 0,391113982 |
| Hist1h4m     | 0,33  | 0,486017278 | 0,12  | 0,834702492 | -0,1  | 0,906709737 | 0,39  | 0,230711382 | 0,49  | 0,493920965 |
| Hist2h2ab    | -1,16 | 0,228694841 | -1,48 | 0,094302217 | 0,82  | 0,196405438 | 1,48  | 0,031382387 | 0,32  | 0,763240477 |
| Hist2h2ac    | -1,34 | 0,124654295 | -1,9  | 0,467362999 | 0,82  | 0,318751836 | 2,33  | 0,100992432 | 0,12  | 0,871762678 |
| Hist2h2bb    | -1,06 | 0,488761869 | -1,82 | 0,302845725 | 0,33  | 0,849342965 | 0,33  | 0,81096279  | 0,27  | 0,665731338 |
| Hist2h2be    | -0,45 | 0,61200942  | -0,19 | 0,864363741 | -0,34 | 0,79541037  | 0,01  | 0,997722368 | 0,07  | 0,979392852 |
| Hist2h3b     | -0,24 | 0,778869381 | -0,11 | 0,792112243 | -0,07 | 0,923350407 | 0,05  | 0,924453604 | 0,33  | 0,720742956 |
| Hist2h3c1    | 0,33  | 0,78682706  | 0,19  | 0,706671369 | -0,08 | 0,951365287 | -0,95 | 0,19937858  | -0,47 | 0,550083777 |
| Hist2h3c2    | 0,11  | 0,859600103 | 0,13  | 0,927424229 | 0,13  | 0,948161279 | -1,03 | 0,171146463 | -0,34 | 0,648593384 |
| Hist2h4      | -0,42 | 0,627312744 | 0,63  | 0,559743815 | -0,54 | 0,689270883 | -2,07 | 0,069060458 | 0,17  | 0,909596996 |
| Hist3h2a     | 0,53  | 0,563164645 | 0,88  | 0,16219325  | -1,22 | 0,209201872 | -2,55 | 0,006090299 | 0,5   | 0,40189401  |
| Hist3h2ba    | -0,02 | 0,976314749 | 0,19  | 0,708156013 | 0,33  | 0,764671707 | -5,18 | 0,011605483 | -0,92 | 0,394784905 |
| Hist3h2bb-ps | -0,16 | 0,701016318 | -0,07 | 0,883373776 | -0,29 | 0,77253131  | -0,17 | 0,779547737 | 0,15  | 0,845218636 |
| Hist4h4      | -0,7  | 0,190706898 | -0,8  | 0,30567226  | 0,42  | 0,474169312 | 0,06  | 0,95852873  | 0,02  | 0,98855352  |
| Hivep1       | 0,59  | 0,322835282 | 0,26  | 0,517288934 | -0,56 | 0,224747376 | 0,37  | 0,337549046 | 0,62  | 0,168781914 |
| Hivep2       | 0,29  | 0,745617945 | 0,46  | 0,508633526 | 0,04  | 0,974161946 | 0,33  | 0,502488051 | 0,38  | 0,402243953 |
| Hivep3       | -0,27 | 0,70137787  | 0,2   | 0,67361039  | 0,13  | 0,919116989 | -1,67 | 0,019419918 | 0,04  | 0,973428839 |
| Hjurp        | -0,39 | 0,610309983 | -0,58 | 0,388708158 | 0,57  | 0,378741497 | 0,61  | 0,336899263 | -0,21 | 0,851143481 |
| Hk1          | -0,17 | 0,763539907 | 0,4   | 0,393435414 | -0,22 | 0,849342965 | 0,25  | 0,70677325  | 0,35  | 0,619519967 |
| Hk1os        | -0,32 | 0,585250756 | -0,34 | 0,722181333 | 0     | 0,999157078 | -0,15 | 0,774826947 | -0,05 | 0,967860497 |
| Hk2          | -0,34 | 0,474293292 | -0,19 | 0,717601192 | 0,66  | 0,235612389 | 0,17  | 0,752599588 | 0,04  | 0,969617491 |
| Hk3          | 0,44  | 0,471980619 | 0,28  | 0,753518459 | 0,02  | 0,978217059 | 0,09  | 0,9081379   | 0,25  | 0,687514851 |
| Hkdc1        | -0,03 | 0,974011242 | -0,08 | 0,882589938 | 0,03  | 0,967930981 | -0,04 | 0,936955674 | -0,24 | 0,723883531 |
| Hlcs         | -0,44 | 0,407600798 | -0,53 | 0,699039887 | 0,35  | 0,657277431 | -0,15 | 0,811484376 | -0,31 | 0,594109073 |
| Hlf          | 0,22  | 0,778869381 | 0,22  | 0,80097084  | -0,82 | 0,076696168 | -1,2  | 0,07447829  | -0,11 | 0,904684159 |
| Hltf         | -0,27 | 0,617280733 | -0,44 | 0,432028918 | -0,78 | 0,343771063 | 0,58  | 0,614020247 | -0,2  | 0,904040121 |
| Hlx          | -0,53 | 0,163088889 | -0,14 | 0,745130453 | 0,56  | 0,50984952  | 0,11  | 0,900918368 | 0,07  | 0,94919447  |
| Hmbox1       | -0,13 | 0,817366963 | -0,1  | 0,909329669 | 0,18  | 0,838289412 | -0,48 | 0,303771917 | -0,52 | 0,295762635 |
| Hmbs         | -0,17 | 0,799493751 | -0,24 | 0,653888048 | 0,25  | 0,659712518 | 0,67  | 0,471405206 | -0,03 | 0,984125319 |
| Hmces        | -0,17 | 0,775384541 | -0,45 | 0,41640882  | 0,49  | 0,260200895 | 0,67  | 0,078919423 | 0,18  | 0,856295805 |
| Hmcn1        | -0,75 | 0,11435382  | -0,55 | 0,720857435 | 0,47  | 0,68845998  | 0,03  | 0,982534991 | -1,17 | 0,139934617 |
| Hmcn2        | 0,18  | 0,66609472  | 0,1   | 0,854940418 | -0,17 | 0,786634846 | -0,14 | 0,740387741 | -0,11 | 0,872708613 |

|            |       |             |       |             |       |             |       |             |       |             |
|------------|-------|-------------|-------|-------------|-------|-------------|-------|-------------|-------|-------------|
| Hmg20a     | 0,17  | 0,777335496 | 0,28  | 0,548847572 | -0,27 | 0,8785896   | -0,75 | 0,216247016 | -0,92 | 0,319354568 |
| Hmg20b     | -0,14 | 0,777335496 | -0,12 | 0,874448335 | 0,16  | 0,862892093 | 0,39  | 0,451950778 | -0,03 | 0,977247356 |
| Hmga1      | -0,35 | 0,532965036 | 0,16  | 0,877770697 | -0,34 | 0,536736017 | 0,44  | 0,361606037 | 0,87  | 0,149951093 |
| Hmga2      | -0,04 | 0,952716285 | 0,26  | 0,548858367 | 0,28  | 0,736401647 | -0,14 | 0,82679937  | 0,1   | 0,936891287 |
| Hmga2-ps1  | 0,43  | 0,563164645 | 0,67  | 0,390751508 | 1,19  | 0,165399945 | 0,38  | 0,266518233 | 0,23  | 0,69063878  |
| Hmgb1      | -0,54 | 0,280113011 | -0,34 | 0,666450149 | 0,43  | 0,400880567 | -0,03 | 0,968266606 | -0,23 | 0,637958817 |
| Hmgb1-rs17 | -0,11 | 0,87094817  | 0,06  | 0,900801202 | 0,25  | 0,653409157 | -0,32 | 0,424096716 | -0,04 | 0,982813638 |
| Hmgb2      | -0,58 | 0,187756134 | -0,79 | 0,361859121 | 0,94  | 0,10424513  | 1,13  | 0,100311317 | -0,25 | 0,719609866 |
| Hmgb3      | 0,09  | 0,842065821 | 0,04  | 0,959530662 | 0     | 0,997548073 | -0,09 | 0,865094556 | 0,03  | 0,973576804 |
| Hmgb4      | -0,09 | 0,85110723  | 0,08  | 0,87464113  | -0,07 | 0,904239687 | 0,06  | 0,878979995 | 0,41  | 0,378814275 |
| Hmgb4os    | 0,21  | 0,698231814 | 0,51  | 0,394990497 | -0,24 | 0,679895309 | -0,28 | 0,592207037 | -0,29 | 0,647677448 |
| Hmgcl      | -0,04 | 0,96311249  | 0,14  | 0,735554037 | 0,81  | 0,274045912 | 0,13  | 0,740434535 | -0,32 | 0,561177697 |
| Hmgcl1     | 0,09  | 0,940936429 | -0,51 | 0,631268141 | 0,28  | 0,790538695 | 0,01  | 0,993629132 | -0,08 | 0,961406182 |
| Hmgcr      | 0,05  | 0,950837484 | -0,46 | 0,582287976 | 1     | 0,120742118 | 1,02  | 0,025067207 | 0,01  | 0,992406971 |
| Hmgcs1     | -0,15 | 0,836948918 | -0,44 | 0,437403081 | 0,56  | 0,237346942 | 0,22  | 0,895284859 | -0,28 | 0,872242794 |
| Hmgcs2     | -0,03 | 0,972180409 | -0,15 | 0,800191117 | -0,23 | 0,733092626 | -0,9  | 0,296643088 | 0,06  | 0,977967676 |
| Hmgn1      | -0,31 | 0,393169325 | -0,35 | 0,410501758 | 0,8   | 0,085757866 | 0,3   | 0,476161304 | -0,15 | 0,808178104 |
| Hmgn3      | 0,04  | 0,97382475  | 0,69  | 0,219055424 | -0,68 | 0,343594254 | -0,47 | 0,335213853 | -0,02 | 0,984724142 |
| Hmgn5      | -1,05 | 0,05535238  | -1,23 | 0,377669413 | 0,38  | 0,80793663  | 1,52  | 0,167461663 | 0,05  | 0,980945466 |
| Hmgxb3     | -0,05 | 0,944809819 | -0,03 | 0,959685428 | 0,68  | 0,145335521 | 0,28  | 0,548151613 | -0,08 | 0,928671864 |
| Hmgxb4     | -0,08 | 0,897013506 | -0,07 | 0,935984823 | 0,57  | 0,673463454 | -0,45 | 0,319397177 | -0,58 | 0,26978787  |
| Hmha1      | -0,25 | 0,759147139 | -0,33 | 0,69017867  | 0,11  | 0,905632058 | -1,67 | 0,072933098 | -0,73 | 0,335679372 |
| Hmmr       | -1,45 | 0,124327015 | -0,92 | 0,487771533 | 1,16  | 0,091781479 | 2,53  | 0,038935822 | -0,07 | 0,947257087 |
| Hmox1      | 0,04  | 0,966775766 | -0,67 | 0,360463363 | -0,01 | 0,996533557 | 1,28  | 0,139647943 | -0,13 | 0,935808074 |
| Hmox2      | -0,33 | 0,421957622 | -0,06 | 0,920755087 | -0,22 | 0,848485609 | 0,28  | 0,428855564 | -0,72 | 0,106654559 |
| Hmx1       | 0,22  | 0,54401985  | 0,13  | 0,774278866 | -0,41 | 0,387362229 | -0,14 | 0,698748695 | 0,08  | 0,939948423 |
| Hmx2       | 0,09  | 0,84377795  | 0,13  | 0,857388191 | 0     | 0,997581017 | -0,02 | 0,975655831 | 0,11  | 0,886154125 |
| Hmx3       | 0,16  | 0,83264366  | -0,05 | 0,940046211 | 0     | 0,997268369 | 0,17  | 0,665063395 | 0,2   | 0,763240477 |
| Hn1        | 0,08  | 0,859044359 | -0,2  | 0,61193546  | 0,49  | 0,491914817 | 0,32  | 0,370429334 | 0,38  | 0,443268905 |
| Hn1l       | -0,12 | 0,842297453 | 0,03  | 0,979551751 | 0,37  | 0,534976235 | 0,67  | 0,140895981 | 0,49  | 0,261150696 |
| Hnf1a      | 0,27  | 0,642618049 | -0,24 | 0,544440118 | 0,03  | 0,971383436 | 0,23  | 0,692059018 | 0,23  | 0,796146369 |
| Hnf1aos1   | 0,02  | 0,989030713 | 0,53  | 0,350369095 | 0,17  | 0,835677021 | 0,02  | 0,973848105 | -0,21 | 0,754898455 |
| Hnf1b      | 0,24  | 0,595372206 | 0,4   | 0,532629904 | 0,96  | 0,032938865 | -0,87 | 0,085065241 | -0,23 | 0,677687906 |
| Hnf4a      | -0,29 | 0,580909375 | -0,02 | 0,992175086 | 0,25  | 0,763691662 | -0,45 | 0,487870957 | 0,29  | 0,720844381 |
| Hnf4aos    | 0,14  | 0,748637664 | 0,19  | 0,700928109 | -0,39 | 0,500343254 | -0,21 | 0,578556436 | -0,11 | 0,879075155 |



|           |       |             |       |             |       |             |       |             |       |             |
|-----------|-------|-------------|-------|-------------|-------|-------------|-------|-------------|-------|-------------|
| Hnf4g     | 0,03  | 0,970532429 | 0,01  | 0,994735911 | 0,05  | 0,963214977 | -0,5  | 0,749306304 | -0,04 | 0,987680175 |
| Hnmt      | -0,24 | 0,673291416 | 0,16  | 0,87462784  | -0,43 | 0,614237718 | 0,27  | 0,75042638  | 0,77  | 0,142592596 |
| Hnrnpa0   | -0,18 | 0,771252343 | -0,01 | 0,996113371 | -0,09 | 0,929871006 | -0,43 | 0,283863154 | -0,15 | 0,836209924 |
| Hnrnpa1   | -0,42 | 0,441176207 | 0,01  | 0,996105203 | 0,17  | 0,765864081 | 0,96  | 0,113591681 | 0,63  | 0,211424699 |
| Hnrnpa2b1 | -0,38 | 0,39120208  | 0,05  | 0,95021587  | 0,32  | 0,545567013 | 0,17  | 0,698362346 | 0,34  | 0,490950217 |
| Hnrnpa3   | -0,12 | 0,829299665 | 0,06  | 0,954502447 | -0,58 | 0,473499244 | -0,54 | 0,331604006 | 0,13  | 0,877865585 |
| Hnrnpab   | -0,5  | 0,198561534 | -0,31 | 0,426168855 | 0,47  | 0,270313252 | 0,4   | 0,204370449 | 0,03  | 0,96738578  |
| Hnrnpc    | 0,2   | 0,586458491 | -0,09 | 0,852563873 | 0,13  | 0,881924837 | 0,14  | 0,77077388  | 0,05  | 0,953971867 |
| Hnrnpd    | -0,43 | 0,419591944 | 0,04  | 0,934294134 | 0,44  | 0,27041915  | 0,81  | 0,201397664 | 0,78  | 0,272223679 |
| Hnrnpdl   | 0,21  | 0,722415783 | 0,18  | 0,704681588 | -0,24 | 0,798320169 | 0,53  | 0,560158352 | 0,32  | 0,765340194 |
| Hnrnpf    | -0,1  | 0,914696579 | 0,17  | 0,686572688 | -0,13 | 0,864814287 | 0,02  | 0,971100918 | 0,23  | 0,716191367 |
| Hnrnpgh1  | 0,05  | 0,948926586 | 0,08  | 0,88741189  | 0,01  | 0,993379272 | -0,19 | 0,592045618 | 0,4   | 0,403887774 |
| Hnrnpgh2  | 0,05  | 0,962030279 | -0,12 | 0,935329426 | -0,32 | 0,712697139 | 0,52  | 0,612100419 | 0,55  | 0,562561822 |
| Hnrnpgh3  | 0,25  | 0,803772516 | 0,01  | 0,999395995 | -0,82 | 0,39150295  | -0,37 | 0,832609779 | 0,47  | 0,794006294 |
| Hnrnpk    | -0,19 | 0,620468351 | -0,04 | 0,940046211 | 0,16  | 0,81808517  | 0,27  | 0,39940395  | 0,06  | 0,935739911 |
| Hnrnpl    | -0,44 | 0,279793863 | -0,23 | 0,747707816 | 0,31  | 0,551307878 | 0,29  | 0,51524047  | -0,43 | 0,329284951 |
| Hnrnpdl   | -0,55 | 0,25387015  | -0,24 | 0,700693848 | 0,74  | 0,503729732 | 0,78  | 0,353659682 | -0,08 | 0,956610289 |
| Hnrnpm    | -0,04 | 0,958395861 | 0,05  | 0,922399849 | 0,22  | 0,807786405 | 0,13  | 0,812655177 | 0,38  | 0,507222763 |
| Hnrnpr    | -0,18 | 0,850851423 | -0,57 | 0,546556396 | -0,25 | 0,660920525 | 0,26  | 0,665832473 | -0,27 | 0,792305774 |
| Hnrnpu    | -0,29 | 0,470397003 | -0,21 | 0,723566168 | 0,23  | 0,785676028 | 0,67  | 0,093418481 | 0,13  | 0,860292816 |
| Hnrnpul1  | -0,16 | 0,751534367 | -0,19 | 0,655693341 | 0,01  | 0,995401448 | -0,08 | 0,875993251 | -0,38 | 0,511046303 |
| Hnrnpul2  | -0,27 | 0,513412557 | 0,07  | 0,91395667  | 0,4   | 0,562427034 | -0,03 | 0,95852873  | -0,12 | 0,866285506 |
| Hoga1     | -0,29 | 0,729108809 | 0,1   | 0,82304324  | 0,54  | 0,452591628 | -0,68 | 0,195546484 | -0,38 | 0,602231893 |
| Homer1    | 0,26  | 0,696639604 | -0,06 | 0,955242777 | -0,02 | 0,991456043 | -0,36 | 0,499384622 | -0,26 | 0,746672639 |
| Homer2    | 0,3   | 0,7463048   | -0,24 | 0,576589548 | -0,13 | 0,887630371 | 0,11  | 0,812468015 | 0,12  | 0,886027227 |
| Homer3    | -0,04 | 0,963036332 | 0,03  | 0,98230594  | -0,11 | 0,926091985 | 0,07  | 0,910859165 | 0,27  | 0,655956123 |
| Homez     | -0,33 | 0,753900874 | -0,53 | 0,602956592 | -0,15 | 0,898684568 | -0,15 | 0,921731995 | 0,09  | 0,959398085 |
| Hook1     | -0,05 | 0,958188047 | 0,51  | 0,604914697 | -0,17 | 0,834205123 | -0,37 | 0,4430986   | 0,07  | 0,947254077 |
| Hook2     | 0,21  | 0,874037681 | 0,4   | 0,729172466 | 0,1   | 0,920124188 | -0,54 | 0,474041275 | -0,2  | 0,830415283 |
| Hook3     | -0,32 | 0,416726762 | -0,03 | 0,971464245 | 0,34  | 0,487799104 | 0,14  | 0,816418251 | 0,34  | 0,738260196 |
| Hopx      | -0,36 | 0,301230942 | -0,09 | 0,892869412 | 0,1   | 0,922318683 | 0,11  | 0,75485675  | 0,21  | 0,876418697 |
| Hormad1   | 0,27  | 0,722415783 | -0,12 | 0,781665479 | -0,27 | 0,627263762 | -0,11 | 0,798222195 | -0,67 | 0,168781914 |
| Hormad2   | 0,28  | 0,656407627 | 0,22  | 0,610055593 | 0,05  | 0,950846671 | 0,12  | 0,809114132 | 0,24  | 0,697757911 |
| Hotair    | -0,03 | 0,965991176 | -0,05 | 0,957659362 | 0,04  | 0,961800548 | -0,07 | 0,857884225 | -0,4  | 0,380694619 |
| Hottip    | 0,01  | 0,989017567 | -0,14 | 0,781665479 | -0,14 | 0,777918093 | 0,02  | 0,979739087 | 0,15  | 0,82887107  |

|          |       |             |       |             |       |             |       |             |       |             |
|----------|-------|-------------|-------|-------------|-------|-------------|-------|-------------|-------|-------------|
| Hoxa1    | 0,02  | 0,985041418 | -0,12 | 0,966717367 | 0,79  | 0,437087993 | 1,05  | 0,122676933 | 0,01  | 0,992370267 |
| Hoxa10   | -0,37 | 0,586458491 | -0,25 | 0,615311543 | 0,12  | 0,878717363 | -0,95 | 0,027595933 | -0,68 | 0,214123599 |
| Hoxa11   | 0,06  | 0,922118639 | 0,03  | 0,969019461 | -0,26 | 0,750027264 | 0,2   | 0,530766711 | -0,12 | 0,885872093 |
| Hoxa11os | 0,36  | 0,687662951 | 0,42  | 0,666536112 | -0,02 | 0,991834178 | -0,19 | 0,736730464 | 0,4   | 0,593599703 |
| Hoxa13   | -0,16 | 0,886680488 | -0,07 | 0,966078321 | -0,36 | 0,54553349  | 0,01  | 0,994818044 | -0,33 | 0,676404522 |
| Hoxa2    | -0,75 | 0,455315088 | -0,65 | 0,745130453 | -0,28 | 0,852412472 | 0,42  | 0,820740116 | -0,12 | 0,97206128  |
| Hoxa3    | -0,06 | 0,954648978 | -0,42 | 0,781665479 | 0,17  | 0,840946476 | -0,1  | 0,922740736 | -0,56 | 0,606740281 |
| Hoxa4    | -0,55 | 0,433787382 | -0,32 | 0,750273889 | 0,22  | 0,777417583 | 0,55  | 0,32504036  | 0,24  | 0,810820885 |
| Hoxa5    | -0,5  | 0,514360833 | 0,29  | 0,495502047 | -0,01 | 0,992972594 | -0,25 | 0,57069357  | 0,08  | 0,912944912 |
| Hoxa6    | -0,66 | 0,39713821  | 0,28  | 0,756267547 | 1,02  | 0,454399654 | -0,85 | 0,348565724 | -0,1  | 0,951429597 |
| Hoxa7    | -0,16 | 0,704646948 | -0,2  | 0,802979985 | 0,22  | 0,61190379  | -0,08 | 0,907413866 | 0,18  | 0,845218636 |
| Hoxa9    | 0,31  | 0,655961186 | -0,05 | 0,958545812 | -0,55 | 0,488297671 | -1,96 | 0,020974704 | 0,43  | 0,550744961 |
| Hoxaas2  | 0,04  | 0,959985598 | 0,21  | 0,629493333 | -0,08 | 0,941437449 | 0,36  | 0,467580023 | -0,09 | 0,917710291 |
| Hoxaas3  | -0,36 | 0,401793319 | 0,14  | 0,855822577 | 0     | 0,999329448 | 0,27  | 0,700603284 | 0,77  | 0,188143555 |
| Hoxb1    | -0,17 | 0,739638841 | 0,24  | 0,582287976 | -0,42 | 0,585264403 | 0,03  | 0,959170858 | -0,22 | 0,759953618 |
| Hoxb13   | 0,31  | 0,656034838 | 0,11  | 0,873411651 | -0,12 | 0,925417014 | -0,1  | 0,8480134   | -0,21 | 0,85439479  |
| Hoxb2    | -0,25 | 0,556745354 | -0,04 | 0,965364463 | 0,34  | 0,62463782  | 0,67  | 0,22307663  | 0,49  | 0,614950124 |
| Hoxb3    | 0,1   | 0,95359921  | 0,69  | 0,362584617 | -0,27 | 0,825914825 | -0,95 | 0,023573716 | -0,15 | 0,824818547 |
| Hoxb4    | -0,38 | 0,455001921 | 0,08  | 0,908448947 | -0,71 | 0,474169312 | -0,19 | 0,761031448 | 0,42  | 0,638780444 |
| Hoxb5    | 0,52  | 0,236389108 | 0,67  | 0,271257402 | -0,28 | 0,649319557 | -0,98 | 0,063330306 | -0,03 | 0,979341305 |
| Hoxb5os  | 0,22  | 0,782586323 | 0,21  | 0,614530823 | 0,07  | 0,944441051 | -0,25 | 0,532514905 | -0,31 | 0,708898543 |
| Hoxb6    | -0,73 | 0,249740343 | 0,38  | 0,672956641 | -0,53 | 0,339833202 | -0,95 | 0,14425577  | 0,18  | 0,829437698 |
| Hoxb7    | -0,06 | 0,965468545 | -0,33 | 0,509013394 | 0,25  | 0,881461218 | 0,13  | 0,882802901 | 0,19  | 0,869765418 |
| Hoxb8    | 0,16  | 0,850487243 | 0,07  | 0,974798548 | 0,31  | 0,725191296 | -0,11 | 0,9379118   | 0,49  | 0,638349312 |
| Hoxb9    | -0,41 | 0,322835282 | -0,66 | 0,40873647  | -0,59 | 0,293205225 | -1,6  | 0,009870967 | 0,11  | 0,891886978 |
| Hoxc10   | -0,04 | 0,944652244 | 0,42  | 0,300643226 | 0,15  | 0,829543101 | -0,06 | 0,932315462 | 0,22  | 0,816663211 |
| Hoxc11   | 0,01  | 0,989236199 | 0,17  | 0,84786877  | 0,29  | 0,69297088  | -0,45 | 0,183984809 | -0,35 | 0,454711077 |
| Hoxc12   | -0,36 | 0,556466514 | 0,14  | 0,798741467 | 0,03  | 0,965007082 | -0,03 | 0,967674649 | -0,06 | 0,950021061 |
| Hoxc13   | -0,03 | 0,959044734 | 0,16  | 0,819120994 | -0,28 | 0,554535106 | -0,22 | 0,540862637 | 0,18  | 0,758052028 |
| Hoxc4    | -0,02 | 0,98782208  | -0,22 | 0,717942902 | -0,23 | 0,723987482 | -0,44 | 0,623649597 | -0,14 | 0,906117814 |
| Hoxc5    | -0,12 | 0,889252203 | -0,14 | 0,916255958 | 0,06  | 0,938795886 | 0,19  | 0,800899563 | -0,03 | 0,980945466 |
| Hoxc6    | -0,05 | 0,972720447 | -0,34 | 0,491478704 | 1,03  | 0,127824952 | -0,33 | 0,695585958 | -0,38 | 0,774255591 |
| Hoxc8    | -0,23 | 0,602723417 | 0,31  | 0,668764344 | -0,27 | 0,738922327 | -0,29 | 0,661506595 | -0,03 | 0,981677577 |
| Hoxc9    | 0,41  | 0,426418331 | 0,17  | 0,829923566 | -0,55 | 0,260200895 | -0,35 | 0,486349277 | 0,26  | 0,654121765 |
| Hoxd1    | -0,25 | 0,791021845 | 0,27  | 0,807175471 | -0,06 | 0,945886808 | 0,23  | 0,511493252 | 0,16  | 0,85945887  |

|          |       |             |       |             |       |             |       |             |       |             |
|----------|-------|-------------|-------|-------------|-------|-------------|-------|-------------|-------|-------------|
| Hoxd10   | 0,53  | 0,149740371 | -1,76 | 0,3720905   | 0,4   | 0,66424919  | 2,07  | 0,009073953 | -0,83 | 0,193395228 |
| Hoxd11   | -0,08 | 0,88956316  | -0,45 | 0,297762088 | -0,29 | 0,665914215 | 0,17  | 0,648419169 | 0     | 0,999775166 |
| Hoxd12   | -0,01 | 0,996210327 | -0,38 | 0,49599855  | -0,06 | 0,941627748 | 0,02  | 0,979535553 | -0,2  | 0,859663155 |
| Hoxd13   | 0     | 0,996998625 | -0,36 | 0,428093777 | -0,12 | 0,909371204 | 0,26  | 0,589510349 | -0,61 | 0,253125485 |
| Hoxd3    | 0,59  | 0,371473145 | 0,44  | 0,667502888 | 0     | 0,999931921 | 0,46  | 0,427171447 | 0,45  | 0,351364129 |
| Hoxd3os1 | 0,04  | 0,947117278 | 0,33  | 0,557875295 | -0,2  | 0,702477144 | 0,03  | 0,944558253 | 0,26  | 0,632950159 |
| Hoxd4    | 0,67  | 0,092850129 | 1,15  | 0,136079737 | -0,98 | 0,219053327 | -0,08 | 0,944543584 | 0,7   | 0,344932499 |
| Hoxd8    | 0,19  | 0,783200207 | 0,27  | 0,519915586 | 0,22  | 0,825782434 | 0,42  | 0,23980845  | 0,31  | 0,655657337 |
| Hoxd9    | -0,15 | 0,761457464 | -0,56 | 0,435489861 | 0,24  | 0,767822182 | 1,02  | 0,041009258 | -0,16 | 0,816435488 |
| Hp       | 0,02  | 0,973255755 | 0,19  | 0,740618526 | 0,46  | 0,654328013 | 0,24  | 0,637968592 | 0,28  | 0,73096179  |
| Hp1bp3   | 0,46  | 0,301230942 | 0,1   | 0,857408462 | -0,19 | 0,784775459 | -0,16 | 0,736321894 | 0,01  | 0,992406971 |
| Hpca     | 0,22  | 0,796208298 | -0,49 | 0,798846211 | 0,31  | 0,736303423 | 0,39  | 0,84540229  | 0,61  | 0,594109073 |
| Hpcal1   | 0,13  | 0,829299665 | 0,2   | 0,751316952 | -0,27 | 0,634936323 | -0,61 | 0,119020739 | -0,02 | 0,983494749 |
| Hpcal4   | 0,03  | 0,989110761 | 0,12  | 0,862088357 | -0,24 | 0,842919139 | 0,38  | 0,494737542 | 0,45  | 0,639451374 |
| Hpd      | 0,07  | 0,899660614 | -0,15 | 0,862079816 | -0,25 | 0,727262258 | -0,31 | 0,490205919 | 0,53  | 0,457522975 |
| Hpdl     | 0,2   | 0,655624944 | -0,16 | 0,746613401 | -0,23 | 0,705915392 | 0,3   | 0,424033112 | 0,36  | 0,50483975  |
| Hpgd     | -0,48 | 0,683444889 | 0,32  | 0,80192513  | 0,17  | 0,818550316 | -5,49 | 0,004331967 | 1,11  | 0,411312696 |
| Hpgds    | 0,09  | 0,840654169 | 0,01  | 0,994730653 | -0,1  | 0,902672106 | -0,22 | 0,793039697 | -0,31 | 0,792343964 |
| Hpn      | 0,14  | 0,840218728 | 0,29  | 0,782652703 | 0,22  | 0,734124133 | 0,11  | 0,79475151  | 0,06  | 0,956610289 |
| Hprt     | -0,24 | 0,72951086  | 0,44  | 0,738199172 | 0,33  | 0,688126003 | 0,21  | 0,772462401 | 1,31  | 0,067209311 |
| Hps1     | -0,22 | 0,796967364 | -0,13 | 0,851610126 | 0,52  | 0,561834635 | 0,78  | 0,221107341 | 0,29  | 0,80155635  |
| Hps3     | -0,49 | 0,508006897 | 0,31  | 0,753019615 | 0,06  | 0,969247498 | 0,54  | 0,642729506 | 0,82  | 0,42047199  |
| Hps4     | -0,14 | 0,867924272 | 0,13  | 0,931596594 | -0,1  | 0,917981605 | -0,21 | 0,740510034 | -0,65 | 0,338653241 |
| Hps5     | -0,55 | 0,289147039 | -0,11 | 0,826486917 | -0,02 | 0,993071391 | 0,07  | 0,974719456 | -0,51 | 0,764656525 |
| Hps6     | 0,01  | 0,992533909 | -0,05 | 0,956049982 | 0,44  | 0,571082984 | 0,3   | 0,609249924 | 0,48  | 0,47756273  |
| Hpse     | 0,22  | 0,784951771 | 0,51  | 0,611052267 | -0,96 | 0,235612389 | -0,1  | 0,898801714 | 1,02  | 0,202710391 |
| Hpse2    | 0,07  | 0,914596376 | -0,24 | 0,589051408 | -0,09 | 0,924900978 | -0,4  | 0,629873745 | 0,12  | 0,947771411 |
| Hpx      | 0,09  | 0,888840601 | 0,25  | 0,817110093 | 0,3   | 0,726640095 | 0     | 1           | 0,09  | 0,952696542 |
| Hr       | -0,3  | 0,744352714 | 0,1   | 0,910230372 | 0,42  | 0,639680076 | -0,46 | 0,359852414 | 0,15  | 0,823098095 |
| Hras     | -0,13 | 0,84241758  | 0,04  | 0,945756882 | 0,4   | 0,374827031 | 0,04  | 0,965460482 | -0,06 | 0,957130917 |
| Hrasls   | 0,17  | 0,762798673 | -0,21 | 0,823859284 | -0,34 | 0,529358903 | 0,38  | 0,400497917 | 0,07  | 0,927908317 |
| Hrasls5  | 0,63  | 0,473883942 | 0,57  | 0,707790154 | -0,24 | 0,835250977 | -0,12 | 0,918182274 | 0,65  | 0,445260584 |
| Hrc      | 0     | 0,997905143 | 0,55  | 0,43310124  | -0,47 | 0,443039118 | -0,68 | 0,254444179 | -0,19 | 0,82754719  |
| Hrct1    | -0,07 | 0,923033769 | -0,2  | 0,802755902 | 0,17  | 0,782022139 | 0,02  | 0,981203009 | -0,24 | 0,696763607 |
| Hrg      | -0,37 | 0,378598836 | 0,23  | 0,831873354 | 0,02  | 0,990836784 | -0,06 | 0,93287646  | -0,06 | 0,94654026  |

|          |       |             |       |             |       |             |       |             |       |             |
|----------|-------|-------------|-------|-------------|-------|-------------|-------|-------------|-------|-------------|
| Hrh1     | 0,53  | 0,330871942 | 0,29  | 0,594415097 | -0,08 | 0,938710861 | -0,26 | 0,648071568 | -0,33 | 0,663215768 |
| Hrh2     | 0,33  | 0,460400297 | -0,03 | 0,967776673 | -0,08 | 0,904844142 | 0,37  | 0,252992148 | 0,11  | 0,919028444 |
| Hrh3     | 0,25  | 0,631796741 | -0,16 | 0,702741995 | 0,12  | 0,906602658 | 0,07  | 0,879339892 | -0,18 | 0,865258929 |
| Hrh4     | 0,31  | 0,621890075 | 0,37  | 0,850048209 | -0,23 | 0,823890116 | -0,09 | 0,921929178 | -0,54 | 0,475018341 |
| Hrk      | -0,03 | 0,96097593  | 0,09  | 0,842320315 | 0,12  | 0,88420952  | -0,04 | 0,924110762 | -0,02 | 0,984125319 |
| Hrn      | -0,08 | 0,932110766 | -0,09 | 0,928166934 | -0,19 | 0,841563482 | -0,26 | 0,641349834 | 0,36  | 0,523184505 |
| Hs1bp3   | 0,06  | 0,968500829 | 0,15  | 0,732044571 | 0,28  | 0,780601987 | -0,79 | 0,086968945 | -0,36 | 0,515021287 |
| Hs2st1   | 0,17  | 0,754698324 | 0,32  | 0,510894317 | 0,4   | 0,628048897 | 0,76  | 0,522230981 | 1,21  | 0,321751898 |
| Hs3st1   | -0,76 | 0,17475641  | -1,06 | 0,173700633 | 0,41  | 0,703372614 | -1,65 | 0,024329675 | -0,07 | 0,9523763   |
| Hs3st2   | -0,16 | 0,823108731 | -0,26 | 0,807674009 | -0,14 | 0,823823322 | 0,08  | 0,891790388 | 0,3   | 0,601753447 |
| Hs3st3a1 | 0,07  | 0,958120069 | -0,03 | 0,978904487 | 0,23  | 0,754337745 | 0,21  | 0,660949118 | 0,17  | 0,812549515 |
| Hs3st3b1 | 0,03  | 0,97114796  | 0,08  | 0,926157704 | 0,47  | 0,374422909 | -0,65 | 0,130104159 | -0,21 | 0,712786855 |
| Hs3st4   | 0,11  | 0,870052902 | -0,12 | 0,909329669 | -0,16 | 0,805650014 | 0,07  | 0,89753062  | -0,16 | 0,859050817 |
| Hs3st5   | -0,15 | 0,82191345  | -0,36 | 0,649611595 | 0,17  | 0,906709737 | 0,49  | 0,45958161  | 0,7   | 0,434163214 |
| Hs3st6   | 0,14  | 0,85617916  | 0,38  | 0,49125334  | -0,42 | 0,57717258  | -0,47 | 0,480288448 | 0,69  | 0,400708488 |
| Hs6st1   | -0,32 | 0,498815959 | -0,16 | 0,829391238 | 0,56  | 0,31559267  | 0,29  | 0,577432583 | -0,17 | 0,840515079 |
| Hs6st2   | -0,01 | 0,989374982 | 0,03  | 0,979002922 | 0,05  | 0,94940954  | -0,07 | 0,872512015 | -0,13 | 0,864415219 |
| Hs6st3   | 0,02  | 0,978126898 | 0,01  | 0,995936588 | 0,01  | 0,988395474 | 0,09  | 0,821167193 | 0,12  | 0,851637639 |
| Hsbp1    | 0,05  | 0,910211895 | 0,05  | 0,932338539 | 0,13  | 0,83492007  | 0,03  | 0,943864463 | -0,03 | 0,977903513 |
| Hsbp111  | -0,31 | 0,40412179  | -0,51 | 0,483436169 | 0,19  | 0,822609079 | -0,36 | 0,461501892 | 0,04  | 0,976743304 |
| Hscb     | -0,04 | 0,964124037 | -0,05 | 0,974580396 | -0,25 | 0,758410488 | 0,19  | 0,768880868 | -0,26 | 0,823776279 |
| Hsd11b1  | -0,11 | 0,883923631 | -0,05 | 0,984000632 | -0,06 | 0,978012085 | -0,67 | 0,182485182 | -0,47 | 0,305770423 |
| Hsd11b2  | -0,4  | 0,507090099 | 0,13  | 0,872388615 | 0,23  | 0,780101539 | -0,05 | 0,952909676 | 0,1   | 0,932268703 |
| Hsd17b1  | 0,14  | 0,816596478 | 0,19  | 0,652049041 | -0,52 | 0,349305808 | 0,01  | 0,990203931 | 0,03  | 0,987760164 |
| Hsd17b10 | -0,25 | 0,561911764 | -0,17 | 0,693906911 | 0,53  | 0,417082373 | 0,26  | 0,430056151 | -0,57 | 0,204113479 |
| Hsd17b11 | -0,56 | 0,547518444 | 0,51  | 0,654719935 | -0,12 | 0,955284278 | -1,37 | 0,086293588 | -0,45 | 0,395115041 |
| Hsd17b12 | -0,2  | 0,676668915 | -0,36 | 0,55133026  | 0,41  | 0,454034987 | 0,76  | 0,055569548 | 0,12  | 0,862464115 |
| Hsd17b13 | -0,29 | 0,704646948 | -0,43 | 0,411059412 | -0,06 | 0,965244734 | 0,37  | 0,546662022 | -0,24 | 0,85508146  |
| Hsd17b14 | 0,23  | 0,655130976 | 0,44  | 0,418418761 | -0,33 | 0,62535327  | -0,33 | 0,378311377 | 0,03  | 0,979456872 |
| Hsd17b2  | -0,08 | 0,892823025 | -0,09 | 0,917863429 | -0,32 | 0,625876541 | 0,19  | 0,779951832 | 0,25  | 0,759432231 |
| Hsd17b3  | -0,24 | 0,663560727 | -0,15 | 0,747707816 | -0,52 | 0,386648382 | 0,21  | 0,779448965 | -0,12 | 0,928724353 |
| Hsd17b4  | 0,04  | 0,94727537  | -0,42 | 0,720902851 | 0,57  | 0,398201234 | 0,06  | 0,960747562 | -0,49 | 0,548114996 |
| Hsd17b6  | 0,66  | 0,255702287 | 0,14  | 0,928134372 | -0,15 | 0,841464759 | 0,77  | 0,236263762 | 0,42  | 0,460621168 |
| Hsd17b7  | -0,59 | 0,224898949 | -0,77 | 0,470112519 | -0,54 | 0,751090942 | 0,43  | 0,484166794 | 0     | 0,999572304 |
| Hsd3b1   | -0,18 | 0,800851935 | -0,05 | 0,941572153 | -0,03 | 0,973186233 | -0,18 | 0,768373748 | 0,03  | 0,97881262  |

|          |       |             |       |             |       |             |       |             |       |             |
|----------|-------|-------------|-------|-------------|-------|-------------|-------|-------------|-------|-------------|
| Hsd3b2   | -0,01 | 0,991859434 | 0,12  | 0,934602811 | -0,13 | 0,896467636 | 0,17  | 0,807661309 | 0,2   | 0,841160223 |
| Hsd3b3   | -0,19 | 0,673291416 | -0,09 | 0,957572914 | 0,58  | 0,546286708 | 0,38  | 0,529366123 | 0     | 0,998704075 |
| Hsd3b4   | 0,09  | 0,928944712 | 0,46  | 0,556926763 | -0,51 | 0,512312279 | -0,57 | 0,332781724 | 0,4   | 0,490950217 |
| Hsd3b5   | 0,01  | 0,993175772 | 0,2   | 0,887034644 | 0,06  | 0,959475549 | 0,24  | 0,777533468 | 0,35  | 0,70401038  |
| Hsd3b6   | -0,38 | 0,561405935 | 0,46  | 0,609632892 | 0,53  | 0,321309853 | -0,36 | 0,737087309 | -0,38 | 0,727849883 |
| Hsd3b7   | 0,03  | 0,973698017 | 0,14  | 0,858860016 | -0,24 | 0,839921239 | -0,3  | 0,358631234 | -0,03 | 0,975441362 |
| Hsd11    | -0,18 | 0,897717279 | 0,66  | 0,314267689 | -0,44 | 0,686625108 | -0,7  | 0,129295804 | -1,03 | 0,14014925  |
| Hsd12    | -0,06 | 0,963865514 | -0,04 | 0,980518468 | 0,67  | 0,398201234 | -0,77 | 0,121193897 | -0,05 | 0,970154126 |
| Hsf1     | -0,41 | 0,358030672 | 0,1   | 0,84786877  | -0,27 | 0,64473731  | -0,17 | 0,649343878 | -0,19 | 0,821040461 |
| Hsf2     | -0,41 | 0,716234912 | -0,39 | 0,686908694 | 0,6   | 0,712697139 | 0,39  | 0,515770907 | -0,27 | 0,75465292  |
| Hsf2bp   | -0,59 | 0,357506461 | 0,54  | 0,585138173 | 0,54  | 0,329525512 | 0,43  | 0,270345878 | 0,28  | 0,592421943 |
| Hsf3     | 0,07  | 0,932059519 | -0,04 | 0,976583732 | -0,2  | 0,749607234 | -0,05 | 0,971599131 | -0,57 | 0,581802025 |
| Hsf4     | -0,08 | 0,888962766 | 0,29  | 0,734852258 | 0,1   | 0,898305096 | -0,17 | 0,744077504 | 0,37  | 0,447019099 |
| Hsf5     | 0,02  | 0,984660167 | -0,19 | 0,831404974 | -0,44 | 0,567918713 | -0,19 | 0,662587743 | -0,3  | 0,662243245 |
| Hsfy2    | -0,02 | 0,98456417  | -0,05 | 0,950478648 | 0,03  | 0,973998536 | 0,54  | 0,260724934 | 0,24  | 0,689582775 |
| Hsh2d    | -0,09 | 0,898486651 | -0,3  | 0,78389111  | -0,22 | 0,737821076 | 0,56  | 0,094014104 | 0,42  | 0,481873486 |
| Hsp90aa1 | 0,17  | 0,738448626 | -0,27 | 0,738762579 | -0,53 | 0,514418101 | -0,28 | 0,617560575 | 0,71  | 0,19665916  |
| Hsp90ab1 | -0,2  | 0,585780254 | 0     | 1           | 0,07  | 0,926091985 | 0,13  | 0,712917628 | 0,2   | 0,744868254 |
| Hsp90b1  | 0,07  | 0,884700395 | -0,09 | 0,859339023 | -0,06 | 0,930058413 | 0,41  | 0,278825037 | 0,29  | 0,581802025 |
| Hspa12a  | 0,82  | 0,422033372 | 1,08  | 0,559467776 | 0,09  | 0,943788892 | -1,7  | 0,069998075 | -1,28 | 0,172959768 |
| Hspa12b  | -0,78 | 0,156998083 | -0,09 | 0,875032856 | -0,65 | 0,501058575 | -0,46 | 0,243610071 | -0,15 | 0,830405539 |
| Hspa13   | -0,35 | 0,787452068 | 0,29  | 0,849511429 | 0,45  | 0,628048897 | 0,23  | 0,838900582 | -0,09 | 0,960974478 |
| Hspa14   | -0,38 | 0,374444487 | -0,2  | 0,589733014 | 0,44  | 0,396123158 | 0,17  | 0,765492742 | -0,33 | 0,628999683 |
| Hspa1a   | 0,05  | 0,965350029 | 1,51  | 0,231255408 | -1,32 | 0,084679044 | -3,07 | 0,014307614 | 0,43  | 0,388897642 |
| Hspa1b   | -0,29 | 0,870767545 | -0,01 | 0,999676804 | -1,08 | 0,457740325 | -0,88 | 0,230237236 | -0,13 | 0,919394046 |
| Hspa1l   | -0,08 | 0,9154154   | 0,35  | 0,698886888 | -0,44 | 0,448782702 | -1,02 | 0,139144003 | 0,66  | 0,419557334 |
| Hspa2    | -0,02 | 0,983663467 | -0,15 | 0,823530278 | -0,32 | 0,498531839 | -0,61 | 0,17736213  | 0,44  | 0,339766572 |
| Hspa4    | -0,05 | 0,940281494 | 0     | 1           | 0,23  | 0,716743339 | 0,51  | 0,3550569   | 0,2   | 0,800540569 |
| Hspa4l   | 0,56  | 0,444232002 | 0,63  | 0,335213512 | -0,59 | 0,418405756 | -0,07 | 0,940891309 | 0,61  | 0,507234235 |
| Hspa5    | -0,06 | 0,922118639 | 0,32  | 0,48761393  | 0,1   | 0,87140695  | 0,16  | 0,663121129 | 0,51  | 0,287283977 |
| Hspa8    | -0,09 | 0,827896405 | 0,18  | 0,706671369 | -0,23 | 0,602259493 | -0,14 | 0,69555863  | 0,21  | 0,702993783 |
| Hspa9    | -0,35 | 0,568479459 | -0,64 | 0,302028989 | 0,25  | 0,589982818 | 0,8   | 0,358502795 | 0,47  | 0,628127128 |
| Hspb1    | -0,25 | 0,858748956 | 0,73  | 0,213731156 | -0,48 | 0,375756922 | -1,81 | 0,01346145  | 0,41  | 0,491578899 |
| Hspb11   | 0,21  | 0,704646948 | -0,22 | 0,65582744  | 0,15  | 0,908846892 | 0,88  | 0,062007487 | 0,29  | 0,600665127 |
| Hspb2    | 0,04  | 0,954333839 | 0,12  | 0,849511429 | 0,05  | 0,961337501 | -0,55 | 0,239405289 | -0,06 | 0,955768408 |

|         |       |             |       |             |       |             |       |             |       |             |
|---------|-------|-------------|-------|-------------|-------|-------------|-------|-------------|-------|-------------|
| Hspb3   | 0,37  | 0,476447186 | 0,15  | 0,833450181 | 0,22  | 0,773646012 | -0,13 | 0,892186579 | -0,25 | 0,760401775 |
| Hspb6   | -0,35 | 0,793637667 | -0,27 | 0,778496491 | 0,18  | 0,808027675 | -0,32 | 0,811054373 | -0,31 | 0,803899856 |
| Hspb7   | -0,09 | 0,884171483 | -0,34 | 0,753920808 | -0,56 | 0,469558664 | -0,25 | 0,604909385 | -0,1  | 0,903863447 |
| Hspb8   | 0,44  | 0,421957622 | -0,05 | 0,979002922 | -0,77 | 0,197507065 | 1,76  | 0,146332437 | 0,64  | 0,574932966 |
| Hspb9   | -0,12 | 0,919758492 | -0,09 | 0,915408548 | -0,01 | 0,993379272 | 0,27  | 0,696558026 | -0,06 | 0,951544448 |
| Hspbap1 | 0,02  | 0,993728727 | 0,03  | 0,975103597 | 0,67  | 0,506266873 | 0,37  | 0,656261393 | 0,23  | 0,845218636 |
| Hspbpb1 | -0,12 | 0,803337362 | -0,35 | 0,443191297 | 0,19  | 0,809137779 | 0,35  | 0,556282326 | -0,28 | 0,693672681 |
| Hspd1   | -0,05 | 0,95538722  | -0,59 | 0,323743964 | 0     | 0,998203936 | 0,5   | 0,515329684 | 0,75  | 0,328082125 |
| Hspe1   | 0,24  | 0,679834484 | -0,11 | 0,815022365 | -0,31 | 0,823823322 | 0,83  | 0,137515028 | 0,67  | 0,214056891 |
| Hspg2   | -0,47 | 0,182425433 | -0,32 | 0,443318093 | 0,43  | 0,448903245 | 0,66  | 0,104880248 | -1,03 | 0,036486741 |
| Hsph1   | 0,23  | 0,712165686 | 0,12  | 0,916042399 | -0,31 | 0,622164682 | 0,01  | 0,996363405 | 0,56  | 0,489169503 |
| Htati2  | -0,38 | 0,721378796 | 0,04  | 0,950607777 | 0,4   | 0,683917899 | 0,39  | 0,439926321 | -0,23 | 0,831108986 |
| Htatsf1 | -0,72 | 0,355202115 | -0,09 | 0,957399989 | 0,91  | 0,228505532 | -0,27 | 0,464013949 | -0,27 | 0,741670129 |
| Htr1a   | 0,42  | 0,531771765 | 0,01  | 0,99804971  | -0,2  | 0,730738549 | 0,17  | 0,818318954 | 0,11  | 0,916173996 |
| Htr1b   | 0,12  | 0,867025523 | 0,11  | 0,903928899 | -0,27 | 0,605339067 | -0,61 | 0,177192888 | -0,01 | 0,986849867 |
| Htr1d   | 0,07  | 0,93115708  | -0,15 | 0,908024228 | -0,37 | 0,61483831  | 0,3   | 0,415707222 | -0,44 | 0,513517573 |
| Htr1f   | 0,1   | 0,848780666 | 0,15  | 0,842259655 | -0,26 | 0,61483831  | -0,13 | 0,812468015 | -0,26 | 0,697818445 |
| Htr2a   | 1,02  | 0,25387015  | 0,27  | 0,826165513 | -0,81 | 0,343771063 | -0,94 | 0,349485753 | -0,75 | 0,475018341 |
| Htr2b   | 0,46  | 0,64625581  | -0,19 | 0,842663656 | 0,24  | 0,9122363   | -0,88 | 0,677607825 | -0,29 | 0,935708361 |
| Htr2c   | 0,74  | 0,17366966  | 0,12  | 0,95098509  | -0,58 | 0,475629395 | 0,16  | 0,783719471 | 0     | 0,996744696 |
| Htr3a   | 0,34  | 0,48308516  | -0,13 | 0,922588722 | 0,16  | 0,818263802 | 0,11  | 0,907108675 | -0,18 | 0,871939686 |
| Htr3b   | 0,09  | 0,888638717 | -0,73 | 0,333537535 | -0,23 | 0,746397133 | 0,56  | 0,193137668 | 0,06  | 0,948163009 |
| Htr4    | -0,36 | 0,642618049 | 0,2   | 0,664710351 | -0,23 | 0,660920525 | -0,37 | 0,823963621 | -0,34 | 0,806478588 |
| Htr5a   | 0,13  | 0,822213681 | 0,1   | 0,90139646  | 0,24  | 0,75341132  | -0,04 | 0,951012871 | -0,36 | 0,559077856 |
| Htr5b   | 0,41  | 0,364628239 | -0,22 | 0,685488588 | -0,06 | 0,950846671 | 0,06  | 0,950082402 | 0,24  | 0,707081609 |
| Htr6    | -0,07 | 0,949362206 | 0,58  | 0,242981491 | -0,24 | 0,8271738   | -0,19 | 0,713874618 | 0,13  | 0,879517285 |
| Htr7    | 0,3   | 0,510850765 | -0,24 | 0,776548278 | -0,29 | 0,638965268 | 0,16  | 0,859952756 | -0,35 | 0,653769438 |
| Htra1   | -0,51 | 0,48475579  | 0,48  | 0,674468926 | 0,65  | 0,449890145 | -2,47 | 0,009581296 | -0,67 | 0,441518757 |
| Htra2   | -0,39 | 0,619165619 | 0,14  | 0,819802664 | 0,05  | 0,955303601 | 1,23  | 0,234549057 | 0,3   | 0,859303369 |
| Htra3   | 0,14  | 0,829299665 | -0,14 | 0,89081665  | 0,26  | 0,789463884 | 0,1   | 0,922778648 | 0,06  | 0,95587699  |
| Htra4   | 0,14  | 0,892141122 | -0,02 | 0,994137877 | 0,16  | 0,879225295 | 0,17  | 0,790404829 | -0,17 | 0,87645265  |
| Htt     | -0,1  | 0,889013209 | 0,08  | 0,89227395  | -0,31 | 0,628048897 | 0,76  | 0,125507807 | -0,05 | 0,969994712 |
| Hunk    | 0,07  | 0,950780433 | 0,18  | 0,807674009 | -0,18 | 0,807926482 | -0,05 | 0,935478757 | 0,17  | 0,830086988 |
| Hus1    | -0,27 | 0,690085958 | 0,01  | 0,994137877 | 0,07  | 0,937222375 | 0,31  | 0,488287457 | 0,58  | 0,328082125 |
| Hus1b   | 0,28  | 0,679451519 | 0,01  | 0,997711184 | -0,46 | 0,705811313 | 0,14  | 0,716276291 | 0,24  | 0,816979957 |

|               |       |             |       |             |       |             |       |             |       |             |
|---------------|-------|-------------|-------|-------------|-------|-------------|-------|-------------|-------|-------------|
| Huwe1         | -0,28 | 0,423859346 | 0,01  | 0,9860901   | 0,15  | 0,813110365 | -0,13 | 0,798665923 | 0,01  | 0,992022739 |
| Hvcn1         | 0,03  | 0,966775766 | -0,05 | 0,927526485 | 0,45  | 0,590619197 | -1,8  | 0,069880021 | -1,11 | 0,271576025 |
| Hyal1         | -0,28 | 0,69801847  | 0,05  | 0,928134372 | 0,11  | 0,860154053 | -1,8  | 0,051116277 | -0,4  | 0,68987325  |
| Hyal2         | -0,47 | 0,276067733 | -0,41 | 0,426168855 | -0,01 | 0,990836784 | -1,04 | 0,087680745 | -0,47 | 0,525018839 |
| Hyal3         | 0,12  | 0,923022551 | 0,08  | 0,867265251 | 0,03  | 0,985326269 | -0,17 | 0,85301747  | 0,38  | 0,695663909 |
| Hyal4         | 0,03  | 0,978853388 | 0,08  | 0,918694468 | 0,05  | 0,94930407  | 0,55  | 0,321312911 | 0,19  | 0,838652034 |
| Hyal5         | 0,56  | 0,302609278 | -0,08 | 0,942593581 | -0,18 | 0,834979811 | 0,19  | 0,797703378 | -0,12 | 0,939448119 |
| Hyal6         | 0,24  | 0,612515106 | -0,05 | 0,930849936 | 0,11  | 0,894229514 | 0,37  | 0,517178455 | 0,28  | 0,739121045 |
| Hydin         | -0,1  | 0,844880277 | -0,09 | 0,919873208 | -0,14 | 0,876684089 | 0     | 0,996287679 | -0,15 | 0,818887323 |
| Hyi           | -0,37 | 0,379426903 | -0,13 | 0,862821727 | -0,05 | 0,958867495 | -0,14 | 0,746985762 | 0,02  | 0,984125319 |
| Hykk          | -0,06 | 0,973473738 | -0,5  | 0,261042835 | -0,5  | 0,776827883 | 0     | 1           | -1,26 | 0,087632866 |
| Hyls1         | 0,09  | 0,954914776 | -0,14 | 0,818613446 | 0,7   | 0,305948438 | -0,07 | 0,896599656 | 0,25  | 0,736140152 |
| Hyou1         | 0     | 0,996219097 | 0,11  | 0,854940418 | 0,43  | 0,425782502 | 0,32  | 0,476414891 | -0,12 | 0,884640084 |
| Hypk          | -0,13 | 0,768443935 | -0,16 | 0,786394409 | 0,28  | 0,700186861 | 0,66  | 0,177801745 | 0,07  | 0,948935854 |
| Hypm          | 0,2   | 0,617280733 | 0,22  | 0,807175471 | -0,21 | 0,764668807 | 0,22  | 0,604909385 | 0,04  | 0,976743304 |
| I0C0044D17Rik | -0,39 | 0,522710796 | 0,06  | 0,979551751 | -0,15 | 0,838291921 | 0,14  | 0,908141892 | 0,34  | 0,694233384 |
| I730028E13Rik | 0,12  | 0,852198853 | -0,22 | 0,866523301 | -0,23 | 0,721952929 | -0,02 | 0,981203009 | 0,07  | 0,936808447 |
| I730030J21Rik | 0,2   | 0,657872058 | 0,16  | 0,800591362 | -0,01 | 0,994130625 | 0,01  | 0,992906132 | -0,04 | 0,968952017 |
| I830077J02Rik | 0,33  | 0,799992584 | 0,56  | 0,582719433 | 0,18  | 0,864411302 | -1,4  | 0,306414254 | -0,95 | 0,556810057 |
| I830127L07Rik | 0     | 0,996998625 | 0,16  | 0,820806352 | -0,19 | 0,751090942 | -0,55 | 0,526285872 | -0,43 | 0,545867782 |
| I830134H01Rik | 0,29  | 0,538609985 | -0,18 | 0,732847182 | -0,15 | 0,846975965 | -0,12 | 0,859968739 | -0,12 | 0,868885122 |
| lah1          | 0,18  | 0,705404186 | 0,18  | 0,82505545  | 0,73  | 0,329525512 | -0,33 | 0,691917607 | -0,05 | 0,969994712 |
| lapp          | -0,35 | 0,494679097 | 0,39  | 0,717355605 | 0,34  | 0,590619197 | -0,05 | 0,937891155 | 0,25  | 0,714414453 |
| lars          | -0,08 | 0,890974575 | -0,42 | 0,275147283 | 0,91  | 0,302861841 | 0,93  | 0,046894705 | 0,49  | 0,487884435 |
| lars2         | -0,64 | 0,230772742 | -0,15 | 0,832194263 | 0,01  | 0,997220401 | -0,32 | 0,672122673 | -0,46 | 0,583279373 |
| lba57         | 0,12  | 0,931445059 | -0,5  | 0,689397513 | 0,4   | 0,727131283 | 0,1   | 0,943938445 | -0,07 | 0,965244101 |
| lbsp          | 0,15  | 0,816316218 | -0,2  | 0,798458472 | 0,18  | 0,841464759 | -0,14 | 0,829150132 | 0,42  | 0,536683014 |
| lbtk          | -0,08 | 0,910211895 | -0,34 | 0,525889214 | 0,52  | 0,259550802 | 1,16  | 0,129217715 | 0,39  | 0,660989136 |
| lca1          | -0,48 | 0,614127021 | -0,54 | 0,400101233 | 0,71  | 0,227488265 | -0,14 | 0,816901896 | 0,15  | 0,832289552 |
| lca1l         | -0,4  | 0,677292348 | -0,18 | 0,831580851 | -0,27 | 0,647159713 | -0,22 | 0,660476554 | -0,18 | 0,825966687 |
| lcam1         | 0,37  | 0,493333209 | 0,3   | 0,509013394 | -0,32 | 0,647928093 | -0,28 | 0,445296097 | 0,46  | 0,324093515 |
| lcam2         | 0,28  | 0,453061353 | 0,19  | 0,642522903 | -0,26 | 0,682692533 | -0,32 | 0,371151329 | 0,19  | 0,781624977 |
| lcam4         | 0,03  | 0,983184832 | 0,44  | 0,664403089 | 0,42  | 0,495166869 | 0,64  | 0,611837518 | 0,41  | 0,798598035 |
| lcam5         | -0,1  | 0,94913976  | -0,01 | 0,998237793 | -0,35 | 0,538465709 | 0,2   | 0,822355466 | -0,16 | 0,890957032 |
| lce1          | -0,17 | 0,719691888 | 0,01  | 0,998237793 | -0,45 | 0,705811313 | 0,2   | 0,613598847 | -0,13 | 0,879854771 |

|         |       |             |       |             |       |             |       |             |       |             |
|---------|-------|-------------|-------|-------------|-------|-------------|-------|-------------|-------|-------------|
| lce2    | -1,12 | 0,207933797 | -0,89 | 0,228792007 | 0,69  | 0,59744325  | -0,22 | 0,667849424 | -0,28 | 0,673752916 |
| lck     | -0,62 | 0,173359555 | -0,16 | 0,781665479 | 0,8   | 0,435556279 | -0,45 | 0,392084928 | 0,49  | 0,390882671 |
| lcmt    | -0,6  | 0,173359555 | -0,25 | 0,796482292 | 0,28  | 0,76370647  | 0,22  | 0,567305966 | -0,11 | 0,892174364 |
| lcos    | 0,21  | 0,894555208 | 0,21  | 0,716769193 | -0,49 | 0,668077854 | -0,59 | 0,441601214 | 0,59  | 0,682134021 |
| lcosl   | 0,17  | 0,714662474 | 0,7   | 0,237729748 | 0,75  | 0,373051052 | -0,93 | 0,03784406  | 0,23  | 0,734750869 |
| lct1    | 0,17  | 0,758136438 | 0,39  | 0,503805195 | -0,25 | 0,804607903 | -0,56 | 0,19247613  | -0,07 | 0,948759136 |
| lct1os  | 0,07  | 0,924943525 | -0,01 | 0,991131565 | 0,01  | 0,995530191 | 0,01  | 0,987710556 | 0,01  | 0,991480325 |
| ld1     | 0,18  | 0,775122619 | -0,3  | 0,780313717 | -0,23 | 0,85265695  | -0,79 | 0,26951968  | 0,26  | 0,715879151 |
| ld2     | 0,89  | 0,058422748 | 0,76  | 0,274378139 | -0,48 | 0,49392407  | -1,32 | 0,023771139 | 0,22  | 0,740299822 |
| ld3     | 0,2   | 0,612702073 | 0,3   | 0,583200444 | -0,63 | 0,465936592 | -1,2  | 0,092805265 | 0,22  | 0,845723936 |
| ld4     | -0,11 | 0,89763852  | -0,18 | 0,701236298 | -0,24 | 0,628048897 | -1,2  | 0,01851295  | 0,1   | 0,918311716 |
| lde     | -0,09 | 0,835027547 | 0,03  | 0,964875723 | 0,36  | 0,650169259 | 0,34  | 0,573944552 | -0,08 | 0,93522806  |
| ldh1    | -0,35 | 0,464056047 | -0,63 | 0,494161701 | 0,17  | 0,817808747 | 0,88  | 0,25645371  | 0,46  | 0,601753447 |
| ldh2    | -1,47 | 0,111844532 | -0,43 | 0,608466494 | 0,63  | 0,462123525 | -0,47 | 0,249571811 | -0,15 | 0,83005877  |
| ldh3a   | -0,68 | 0,302490503 | -0,68 | 0,529278426 | 0,37  | 0,663785582 | 0,64  | 0,11957503  | -0,31 | 0,604897445 |
| ldh3b   | -0,17 | 0,78999702  | 0,11  | 0,838368852 | 0,04  | 0,973006385 | -0,08 | 0,946578316 | 0,09  | 0,947901649 |
| ldh3g   | -0,31 | 0,424418518 | -0,26 | 0,629834033 | 0,51  | 0,27037497  | -0,21 | 0,603611964 | -0,06 | 0,940438527 |
| ldi1    | -0,36 | 0,793209485 | 0,68  | 0,153524445 | 0,1   | 0,953272779 | -0,89 | 0,098577249 | -0,08 | 0,943463914 |
| ldi2    | -0,03 | 0,955200574 | -0,3  | 0,490814009 | -0,11 | 0,840730961 | 0,55  | 0,171552549 | 0,7   | 0,163175752 |
| ldnk    | 0,88  | 0,253982932 | 0,77  | 0,159045025 | -1,52 | 0,024794626 | -0,44 | 0,243235487 | 1,22  | 0,037274444 |
| ldo1    | 3,29  | 0,067204873 | 4,93  | 0,040620931 | -4,26 | 6,52253E-05 | 0,57  | 0,533818852 | 4,41  | 0,000336363 |
| ldo2    | 1,26  | 0,179751021 | 0,62  | 0,360324171 | -0,61 | 0,13589176  | 0,22  | 0,695517571 | 0,99  | 0,075406105 |
| lds     | -0,07 | 0,892124736 | -0,36 | 0,561842393 | 0,09  | 0,929871006 | -0,83 | 0,04404487  | -0,21 | 0,705953802 |
| ldua    | 0,38  | 0,469785601 | 0,78  | 0,231183878 | -0,21 | 0,787905724 | -0,81 | 0,22844695  | 0,16  | 0,86811326  |
| ler2    | 0,42  | 0,616144081 | 0,23  | 0,781665479 | 0,03  | 0,978840171 | -0,72 | 0,357869114 | 0,03  | 0,981439632 |
| ler3    | -0,07 | 0,922341271 | 0,25  | 0,683621858 | 0,17  | 0,797316566 | -0,68 | 0,115380139 | -0,21 | 0,699059557 |
| ler3ip1 | 0,01  | 0,992748202 | -0,16 | 0,747707816 | 0,15  | 0,891153267 | 0,5   | 0,230711382 | 0,07  | 0,945291688 |
| ler5    | 0,04  | 0,966775766 | 0,7   | 0,163435114 | -0,23 | 0,720590502 | -0,57 | 0,153483139 | -0,18 | 0,811615054 |
| ler5l   | -0,14 | 0,822676888 | 0,43  | 0,566740168 | -0,11 | 0,915452626 | -0,69 | 0,210386547 | 0,49  | 0,340249168 |
| lffo1   | -0,76 | 0,431786106 | -0,35 | 0,613449608 | 0,03  | 0,967913099 | 0,34  | 0,545051688 | -0,3  | 0,728483022 |
| lffo2   | -0,27 | 0,584008829 | 0,22  | 0,606999442 | 0,23  | 0,727131519 | 0,14  | 0,800728247 | 0,13  | 0,891991231 |
| lfi202b | -0,18 | 0,788898468 | 0,01  | 0,990052916 | 1,04  | 0,102008087 | -0,08 | 0,87148686  | -0,03 | 0,979392852 |
| lfi203  | 0,99  | 0,090466364 | 1,21  | 0,0535509   | -0,55 | 0,659694447 | -0,73 | 0,099321276 | 1,29  | 0,016953808 |
| lfi204  | 1,43  | 0,023491241 | 1,2   | 0,223066162 | -1,58 | 0,068517641 | 0,26  | 0,745018548 | 1,39  | 0,034868271 |
| lfi205  | 4,08  | 0,01463807  | 3,99  | 0,008008239 | -1,86 | 0,010231053 | 0,73  | 0,632864667 | 4,67  | 0,00018276  |



|          |       |             |       |             |       |             |       |             |       |             |
|----------|-------|-------------|-------|-------------|-------|-------------|-------|-------------|-------|-------------|
| lfi27    | -0,48 | 0,24246099  | -0,87 | 0,126231471 | 0,55  | 0,316219499 | -0,98 | 0,020408689 | -0,65 | 0,130329289 |
| lfi27i2a | 0,48  | 0,395628811 | -0,08 | 0,958663163 | -0,97 | 0,224747376 | -1,82 | 0,029932586 | 0,44  | 0,635612479 |
| lfi27i2b | 0,18  | 0,710008429 | 0,09  | 0,954024651 | -0,13 | 0,885263358 | -0,58 | 0,153721985 | 0,36  | 0,629683647 |
| lfi30    | 0,05  | 0,960720096 | -0,82 | 0,310466688 | 1,74  | 0,091628027 | -0,37 | 0,513757118 | -0,51 | 0,529148545 |
| lfi35    | 0,53  | 0,189684245 | 0,44  | 0,370515616 | -0,73 | 0,150840372 | -0,11 | 0,871802148 | 0,85  | 0,141398491 |
| lfi44    | 0,58  | 0,229156445 | 0,62  | 0,180750011 | -0,75 | 0,273327632 | -0,84 | 0,049987754 | 0,42  | 0,404813316 |
| lfi44i   | 0,11  | 0,920623861 | -0,3  | 0,647475869 | -0,08 | 0,899136251 | -0,04 | 0,958172386 | 0,09  | 0,917554177 |
| lfi47    | 1,87  | 0,097395165 | 0,67  | 0,176214568 | -2,54 | 0,002848711 | -0,22 | 0,520151433 | 1,03  | 0,029071378 |
| lfi47i   | 0,39  | 0,58079696  | 0,79  | 0,154145842 | -1,02 | 0,112678193 | -0,5  | 0,15999424  | 0,89  | 0,050495377 |
| lfit1    | 0,92  | 0,156998083 | 1,18  | 0,087435995 | -1,06 | 0,206505714 | -2,4  | 0,004331967 | 0,53  | 0,332695011 |
| lfit1bl1 | 0,65  | 0,655695308 | -1,08 | 0,723842223 | -1,05 | 0,302861841 | 1,92  | 0,259810388 | 2,12  | 0,003905995 |
| lfit1bl2 | -0,43 | 0,631573433 | 0,57  | 0,336807729 | -0,14 | 0,816883729 | -1,56 | 0,011079593 | -0,39 | 0,566248044 |
| lfit2    | 0,71  | 0,358933591 | 1,56  | 0,070776028 | -2,28 | 0,000516499 | -1,41 | 0,129997694 | 1,5   | 0,041379235 |
| lfit3    | 0,47  | 0,336864348 | 0,37  | 0,373555617 | -0,69 | 0,179552168 | -0,68 | 0,064116388 | 0,38  | 0,512936186 |
| lfitm1   | 0,59  | 0,612107783 | 0,47  | 0,705845461 | 0,52  | 0,686061973 | 0,23  | 0,566653262 | 1,31  | 0,358437861 |
| lfitm10  | -0,14 | 0,763270657 | -0,25 | 0,507971236 | -0,14 | 0,862146599 | -1,33 | 0,010184354 | -0,41 | 0,592421943 |
| lfitm2   | 0,22  | 0,701627731 | 0,17  | 0,82505545  | 0,07  | 0,923248239 | -0,33 | 0,526787885 | 0,23  | 0,736245226 |
| lfitm3   | 0,54  | 0,181600158 | 0,36  | 0,373555617 | -0,51 | 0,179552168 | -0,12 | 0,726641891 | 0,44  | 0,307816931 |
| lfitm5   | 0,08  | 0,948291116 | 0,82  | 0,544380607 | -0,08 | 0,977939889 | -1,19 | 0,046876083 | 0,03  | 0,976743304 |
| lfitm6   | 0,27  | 0,719691888 | 0,19  | 0,857503073 | -0,22 | 0,834488055 | -0,09 | 0,845272376 | 0,3   | 0,735152891 |
| lfitm7   | 0,01  | 0,995230791 | -0,5  | 0,693337057 | 0,05  | 0,975055092 | 0,3   | 0,810172317 | 0     | 0,998404699 |
| lfltd1   | 0,07  | 0,930130122 | -0,11 | 0,92046066  | -0,03 | 0,969928932 | -0,07 | 0,923587701 | -0,11 | 0,890957032 |
| lfna1    | 0,11  | 0,783672142 | -0,06 | 0,910688765 | -0,15 | 0,809137779 | 0,1   | 0,902706786 | 0,14  | 0,89529118  |
| lfna11   | 0     | 1           | 0,15  | 0,856132795 | 0,1   | 0,904844142 | -0,26 | 0,463963073 | -0,18 | 0,860469017 |
| lfna12   | 0,19  | 0,603330883 | -0,05 | 0,932965109 | -0,04 | 0,960677449 | 0,11  | 0,76240803  | 0,02  | 0,979392852 |
| lfna13   | 0,13  | 0,777335496 | 0,04  | 0,970008914 | 0,05  | 0,934238421 | -0,14 | 0,780046999 | 0,01  | 0,995109577 |
| lfna14   | -0,07 | 0,897747251 | 0,1   | 0,812476351 | -0,4  | 0,533114844 | -0,02 | 0,972500479 | 0,13  | 0,859009237 |
| lfna15   | 0,42  | 0,528355755 | 0,12  | 0,869488567 | -0,21 | 0,791814863 | 0,19  | 0,650855041 | 0,25  | 0,792346596 |
| lfna4    | -0,15 | 0,84241758  | 0,23  | 0,697764796 | -0,16 | 0,862146599 | 0,05  | 0,924303497 | 0,06  | 0,943668392 |
| lfna5    | 0,11  | 0,832696131 | -0,08 | 0,919144578 | -0,16 | 0,863833849 | -0,11 | 0,860410443 | -0,06 | 0,948163009 |
| lfna6    | 0,13  | 0,76418341  | 0,03  | 0,956934125 | -0,03 | 0,965658846 | 0,01  | 0,988718521 | 0,31  | 0,556366004 |
| lfna7    | 0,04  | 0,972701787 | 0,03  | 0,954024651 | -0,06 | 0,96043738  | 0,3   | 0,532220279 | 0,19  | 0,825564898 |
| lfna9    | 0,44  | 0,54401985  | 0,09  | 0,926157704 | 0,02  | 0,977827235 | 0,07  | 0,870926412 | -0,2  | 0,702558142 |
| lfnab    | 0,45  | 0,377372764 | 0,04  | 0,961370411 | 0,13  | 0,850171327 | 0,11  | 0,895880186 | -0,02 | 0,990633766 |
| lfnar1   | 0,02  | 0,969656709 | -0,27 | 0,623534166 | 0,87  | 0,375948654 | 0,68  | 0,124142377 | -0,04 | 0,960974478 |

|         |       |             |       |             |       |             |       |             |       |             |
|---------|-------|-------------|-------|-------------|-------|-------------|-------|-------------|-------|-------------|
| lfnar2  | 0,48  | 0,185196531 | 0,25  | 0,72665096  | -0,25 | 0,673807963 | -0,34 | 0,295171068 | 0,27  | 0,574285481 |
| lfnb1   | 0,04  | 0,95241665  | 0,08  | 0,865420265 | -1,13 | 0,468633043 | 0,37  | 0,342522526 | 1,36  | 0,338653241 |
| lfne    | -0,1  | 0,869565514 | 0,08  | 0,915434803 | -0,07 | 0,925417014 | 0,09  | 0,818711104 | 0,18  | 0,766559546 |
| lfng    | 0,05  | 0,955403502 | 0,11  | 0,852461907 | -0,46 | 0,721369858 | -0,02 | 0,989314626 | 0,23  | 0,881968395 |
| lfngr1  | 0,87  | 0,52372418  | -0,23 | 0,599021965 | 0,53  | 0,693184684 | 0,54  | 0,117249488 | -0,21 | 0,734725045 |
| lfngr2  | -0,19 | 0,632053719 | 0     | 0,998322982 | 0,77  | 0,060717312 | 0,99  | 0,187648401 | -0,13 | 0,917844354 |
| lfnk    | -0,05 | 0,94727537  | 0,01  | 0,997700959 | -0,18 | 0,786838878 | -0,43 | 0,393347892 | -0,22 | 0,830263037 |
| lfnl2   | 0,22  | 0,738714467 | 0,2   | 0,69843     | -0,56 | 0,321474116 | 0,08  | 0,899003207 | 0,37  | 0,545532754 |
| lfnl3   | -0,04 | 0,970390555 | -0,12 | 0,872330696 | 0,24  | 0,82162081  | -0,06 | 0,932315462 | -0,24 | 0,747614877 |
| lfnlr1  | 0,26  | 0,568473441 | 0,21  | 0,77325041  | -0,1  | 0,908400411 | 0,05  | 0,919835104 | 0,37  | 0,756739482 |
| lfnz    | 0,06  | 0,948926586 | 0,02  | 0,992383215 | 0,03  | 0,977081417 | -0,79 | 0,111880248 | 0,15  | 0,879075155 |
| lfrd1   | 0,29  | 0,608307071 | 0,49  | 0,426168855 | -0,06 | 0,941627748 | 0,21  | 0,725169198 | 0,68  | 0,244007864 |
| lfrd2   | -0,16 | 0,834363561 | -0,56 | 0,286908359 | 0,56  | 0,336779465 | 0,69  | 0,279408136 | -0,05 | 0,974110019 |
| lft122  | -0,41 | 0,600518474 | -0,01 | 0,996113371 | 0,15  | 0,86895058  | 0     | 1           | -0,39 | 0,590339443 |
| lft140  | -0,6  | 0,187469741 | 0,56  | 0,277253387 | -0,04 | 0,970482174 | -0,64 | 0,079938142 | 0,16  | 0,791971532 |
| lft172  | -0,36 | 0,632635324 | 0,1   | 0,882589938 | -0,17 | 0,869952072 | -0,2  | 0,807489629 | -0,04 | 0,980072715 |
| lft20   | 0,29  | 0,487942214 | -0,16 | 0,801259805 | -0,15 | 0,864411302 | 0,77  | 0,342955376 | -0,02 | 0,984632256 |
| lft22   | 0,16  | 0,70137787  | 0,1   | 0,862814266 | 0,19  | 0,878636183 | 0,14  | 0,78229113  | -0,74 | 0,159047845 |
| lft27   | -0,29 | 0,391361341 | -0,27 | 0,613449608 | 0,37  | 0,519417527 | 0,05  | 0,961180406 | -0,73 | 0,32673984  |
| lft43   | 0,08  | 0,944291635 | 0,11  | 0,930379126 | 0,52  | 0,548750983 | -0,98 | 0,188842869 | -0,11 | 0,916139921 |
| lft46   | -0,3  | 0,458034281 | -0,42 | 0,561035617 | 0,62  | 0,302861841 | 0,22  | 0,66020673  | -0,6  | 0,238898792 |
| lft52   | -0,05 | 0,946792769 | -0,36 | 0,705624794 | -0,05 | 0,963199274 | 0,13  | 0,818693228 | 0,02  | 0,983713871 |
| lft57   | -0,44 | 0,470166881 | -0,48 | 0,762209383 | 0,8   | 0,661089127 | 0,31  | 0,866389603 | -0,19 | 0,939448119 |
| lft74   | 0,15  | 0,838208309 | -0,32 | 0,80157464  | 0,53  | 0,548288344 | 0,16  | 0,768880868 | 0,07  | 0,944318268 |
| lft80   | -0,33 | 0,850491134 | -0,62 | 0,645775005 | 0,81  | 0,429875222 | 0,21  | 0,895105755 | -0,11 | 0,952296554 |
| lft81   | 0,07  | 0,927686801 | 0,63  | 0,656204868 | 0,25  | 0,761861872 | -0,37 | 0,498525843 | 0,59  | 0,442579293 |
| lft88   | 0,29  | 0,863608769 | 0,34  | 0,553252496 | -0,53 | 0,398389729 | -0,45 | 0,729692436 | 0,4   | 0,777223566 |
| lft88os | 0,2   | 0,656726345 | 0     | 0,998874883 | -0,15 | 0,783006    | -0,04 | 0,958927    | 0,2   | 0,752710644 |
| lgbp1   | -0,04 | 0,948926586 | 0,27  | 0,509013394 | 0,54  | 0,398303268 | -0,23 | 0,480288448 | -0,31 | 0,56717021  |
| lgbp1b  | -0,1  | 0,814334273 | -0,13 | 0,756369219 | -0,06 | 0,919754592 | 0,4   | 0,390424873 | 0,25  | 0,630315985 |
| lgdcc3  | 0,09  | 0,896207658 | -0,08 | 0,878240984 | -0,06 | 0,950846671 | -1,27 | 0,206297098 | -0,28 | 0,835191    |
| lgdcc4  | 0,29  | 0,58112831  | 0,11  | 0,882139913 | -0,17 | 0,751090942 | -0,24 | 0,593439867 | 0,15  | 0,85508146  |
| lgf1    | -0,47 | 0,529026439 | -0,07 | 0,943915456 | 0,35  | 0,675688576 | -2,24 | 0,030492586 | 0,16  | 0,893639656 |
| lgf1os  | 0,17  | 0,738714467 | -0,06 | 0,894676428 | -0,22 | 0,68845998  | 0,09  | 0,868955591 | 0,1   | 0,891375716 |
| lgf1r   | 0,05  | 0,942677069 | 0,13  | 0,75380926  | 0,34  | 0,579926336 | 0,38  | 0,321184055 | -0,45 | 0,493919589 |

|           |       |             |       |             |       |             |       |             |       |             |
|-----------|-------|-------------|-------|-------------|-------|-------------|-------|-------------|-------|-------------|
| lgf2      | -0,13 | 0,840909921 | 0,3   | 0,771847912 | -0,62 | 0,560376292 | -1,65 | 0,011079593 | -0,23 | 0,7911784   |
| lgf2bp1   | -0,27 | 0,692761089 | 0,06  | 0,934294134 | 0,52  | 0,605363924 | -0,15 | 0,831919183 | -0,23 | 0,805875294 |
| lgf2bp2   | -0,34 | 0,586753542 | -0,46 | 0,738199172 | 0,8   | 0,229663854 | -0,78 | 0,382581233 | 0,26  | 0,76521225  |
| lgf2bp3   | 0,07  | 0,89763852  | -0,02 | 0,984710854 | 0,9   | 0,10424513  | -0,09 | 0,930475066 | 0     | 0,996891855 |
| lgf2os    | -0,09 | 0,856854524 | -0,28 | 0,738670649 | -0,24 | 0,70365819  | 0,32  | 0,300673159 | 0,15  | 0,819345755 |
| lgf2r     | -1,07 | 0,089282283 | -0,72 | 0,17349694  | 0,55  | 0,375756922 | 0,63  | 0,227666946 | -0,24 | 0,801385411 |
| lgfals    | -0,04 | 0,95290436  | 0,21  | 0,662243407 | -0,01 | 0,993686224 | -0,01 | 0,988205241 | 0,27  | 0,748520754 |
| lgfbp1    | -0,04 | 0,962030279 | 0,41  | 0,627893736 | 0,19  | 0,83492007  | -0,25 | 0,439928303 | -0,66 | 0,313577247 |
| lgfbp2    | -0,28 | 0,671967164 | -0,09 | 0,853193813 | -0,11 | 0,903942509 | 0,01  | 0,997162948 | -0,13 | 0,918529364 |
| lgfbp3    | -0,22 | 0,559760851 | -0,17 | 0,693906911 | 0,91  | 0,199071989 | 0,58  | 0,226286594 | -0,22 | 0,765342998 |
| lgfbp4    | -1,17 | 0,222236104 | -1,44 | 0,15478032  | 0,74  | 0,074144571 | 0,68  | 0,104453402 | -1,24 | 0,041040337 |
| lgfbp5    | -0,27 | 0,887389217 | -0,59 | 0,546908088 | 0,02  | 0,993379272 | -5,32 | 0,003907268 | -2,26 | 0,011901598 |
| lgfbp6    | -0,24 | 0,773078788 | 0,02  | 0,9860901   | 0,35  | 0,597190829 | -0,15 | 0,736062864 | -0,07 | 0,947212444 |
| lgfbp7    | -0,21 | 0,574398567 | -0,06 | 0,890945229 | 0,08  | 0,895434884 | 0,88  | 0,097396401 | -0,18 | 0,84701421  |
| lgfbpl1   | 0,44  | 0,532523475 | -0,35 | 0,801259805 | -0,19 | 0,714808135 | 0,16  | 0,727532726 | 0,03  | 0,974110019 |
| lgfl3     | 0,25  | 0,660640764 | -0,39 | 0,34712674  | -0,26 | 0,60848236  | 0,27  | 0,512902457 | -0,07 | 0,927122478 |
| lgflr1    | 0,28  | 0,671804987 | 0,68  | 0,585308878 | -0,37 | 0,569097406 | -1,03 | 0,232780849 | -0,15 | 0,889613878 |
| lgfn1     | 0,23  | 0,841140165 | -0,12 | 0,87892334  | -0,25 | 0,751090942 | 0,08  | 0,896599656 | -0,25 | 0,699671375 |
| lghg      | 0,03  | 0,964272364 | 0,14  | 0,832655657 | -0,18 | 0,808002967 | -0,08 | 0,85072326  | -0,12 | 0,866285506 |
| lghg3     | 0,26  | 0,566044466 | -0,11 | 0,822581347 | -0,23 | 0,655423069 | 0,01  | 0,981203009 | 0,1   | 0,906338603 |
| lghm      | 0,31  | 0,519823113 | -0,02 | 0,976583732 | -0,13 | 0,854226893 | 0,43  | 0,219117195 | 0,39  | 0,436708262 |
| lghmbp2   | -0,04 | 0,956452501 | -0,24 | 0,568187167 | 0,15  | 0,823396412 | 0,06  | 0,927735789 | 0,21  | 0,793952361 |
| lgh-V10   | 0,3   | 0,745514605 | 0,13  | 0,91395667  | 0,13  | 0,841669036 | -0,66 | 0,634206388 | -0,35 | 0,85508146  |
| lghv10-3  | 0,2   | 0,679989164 | -0,04 | 0,943915456 | -0,04 | 0,950846671 | -0,01 | 0,986795948 | -0,03 | 0,973428839 |
| lgh-V11   | -0,01 | 0,988431763 | 0,09  | 0,876833095 | -0,03 | 0,973998536 | 0,16  | 0,610361432 | 0,34  | 0,490281231 |
| lghv1-12  | 0,11  | 0,810101389 | -0,06 | 0,969006633 | -0,16 | 0,887782273 | -0,12 | 0,742291133 | -0,19 | 0,76616799  |
| lghv1-47  | -0,04 | 0,955200574 | 0,08  | 0,859834279 | -0,17 | 0,791504463 | -0,18 | 0,639359737 | 0,1   | 0,907121694 |
| lghv1-54  | -0,14 | 0,759147139 | 0,04  | 0,944162046 | -0,04 | 0,963199274 | -0,41 | 0,346895653 | -0,09 | 0,910829332 |
| lghv6-6   | 0,27  | 0,720783705 | 0,03  | 0,959673534 | 0,25  | 0,841464759 | -0,1  | 0,785981962 | 0,03  | 0,979341305 |
| lghv9-4   | 0,26  | 0,610509826 | 0,16  | 0,778589117 | 0,12  | 0,880574524 | -0,05 | 0,914100026 | 0,02  | 0,979392852 |
| lgh-VJ558 | -0,02 | 0,976574175 | 0,16  | 0,753679288 | -0,1  | 0,870263371 | 0,12  | 0,827552132 | 0,22  | 0,736140152 |
| lgh-VS107 | 0,88  | 0,582409222 | 0,28  | 0,864989815 | -0,61 | 0,616398569 | 0,2   | 0,81973025  | 0,34  | 0,763240477 |
| lgh-VX24  | -0,51 | 0,277154156 | -0,26 | 0,638366221 | -0,08 | 0,926974012 | -0,14 | 0,713062148 | -0,48 | 0,389151645 |
| lgk       | -0,17 | 0,723283046 | -0,29 | 0,686540452 | 0,13  | 0,831696508 | -0,19 | 0,694368504 | -0,18 | 0,801987865 |
| lgkv1-133 | 0,48  | 0,559760851 | -0,63 | 0,639618506 | -0,14 | 0,898382247 | 0,3   | 0,713579222 | -0,18 | 0,901341817 |

|            |       |             |       |             |       |             |       |             |       |             |
|------------|-------|-------------|-------|-------------|-------|-------------|-------|-------------|-------|-------------|
| lgkv14-126 | -0,15 | 0,744748605 | 0,04  | 0,975008025 | 0,05  | 0,938864861 | -0,04 | 0,932800758 | -0,09 | 0,902903797 |
| lgkv15-103 | -0,05 | 0,947630317 | 0,08  | 0,860425927 | 0,03  | 0,972847253 | -0,1  | 0,782990724 | -0,17 | 0,816435488 |
| lgk-V28    | -0,05 | 0,933689638 | -0,03 | 0,977204386 | -0,15 | 0,809137779 | -0,02 | 0,970165633 | 0,19  | 0,788546035 |
| lgk-V4     | 0,21  | 0,800740285 | 0     | 0,999692079 | 0,39  | 0,720389578 | -0,16 | 0,657882839 | -0,15 | 0,901782788 |
| lgkv4-59   | 0,08  | 0,879672102 | -0,12 | 0,877660987 | -0,07 | 0,92145606  | 0,04  | 0,946269464 | -0,01 | 0,989300476 |
| lgkv4-68   | 0,21  | 0,642385552 | 0,18  | 0,763796207 | 0     | 0,999931921 | 0,43  | 0,332781724 | 0,31  | 0,68987325  |
| lgkv4-70   | 0,22  | 0,567102759 | 0,08  | 0,900338519 | 0     | 0,998479176 | -0,02 | 0,973927614 | 0,11  | 0,890957032 |
| lgkv4-72   | -0,04 | 0,963914207 | 0,01  | 0,993789602 | 0,33  | 0,555443611 | 0,16  | 0,726287112 | -0,05 | 0,958259949 |
| lgkv6-23   | -0,03 | 0,960807049 | -0,23 | 0,557875295 | 0     | 0,997598048 | 0,22  | 0,598408416 | 0,2   | 0,743341762 |
| lgkv8-19   | 0,23  | 0,6753408   | 0     | 1           | -0,13 | 0,838592669 | -0,06 | 0,898684337 | 0,33  | 0,701874538 |
| lgkv8-30   | 0,18  | 0,74140155  | 0,26  | 0,773969614 | -0,13 | 0,859460126 | 0,18  | 0,726529864 | -0,08 | 0,934344891 |
| lgkv9-120  | 0,04  | 0,94815841  | 0,01  | 0,982137548 | -0,01 | 0,989772079 | -0,12 | 0,727316929 | -0,03 | 0,973576804 |
| lgkv9-124  | 0,18  | 0,72711401  | -0,05 | 0,926566039 | -0,01 | 0,986872007 | -0,06 | 0,87811903  | 0,01  | 0,988153144 |
| lgll1      | 0,15  | 0,798561927 | 0,36  | 0,707806354 | -0,09 | 0,891782315 | -0,32 | 0,356776772 | -0,2  | 0,75509516  |
| lglon5     | 0,07  | 0,889013209 | 0,07  | 0,90251322  | 0,53  | 0,348841509 | 0,17  | 0,675727528 | -0,13 | 0,878996949 |
| lglv1      | 0,24  | 0,676800971 | -0,11 | 0,85154774  | -0,07 | 0,936059691 | 0,23  | 0,812468015 | 0,14  | 0,940878193 |
| lgsf1      | 0,18  | 0,804145128 | -0,31 | 0,59780175  | -0,15 | 0,832665595 | 0,24  | 0,520712666 | 0,13  | 0,851659672 |
| lgsf10     | -0,09 | 0,924561835 | -0,21 | 0,831202629 | 0,35  | 0,693902137 | 0,22  | 0,744077504 | 0,34  | 0,571269418 |
| lgsf11     | -0,46 | 0,443047489 | -0,24 | 0,781665479 | -0,05 | 0,961932655 | -0,12 | 0,918404405 | 0,12  | 0,900611003 |
| lgsf21     | -0,13 | 0,883874799 | 0,66  | 0,430665523 | -0,33 | 0,715497532 | -0,12 | 0,872672077 | -0,22 | 0,836926665 |
| lgsf23     | -0,08 | 0,923532124 | -0,05 | 0,954143906 | 0,27  | 0,74662944  | 0,07  | 0,967047406 | 0,05  | 0,979456872 |
| lgsf3      | -0,33 | 0,520948125 | 0,09  | 0,926157704 | 0,4   | 0,680505102 | -0,06 | 0,953222061 | -0,52 | 0,466753993 |
| lgsf5      | -0,2  | 0,765328991 | 0,45  | 0,47742142  | 0,21  | 0,829285065 | 0,23  | 0,639765346 | 0,28  | 0,736229974 |
| lgsf6      | 0,2   | 0,833900133 | -0,1  | 0,941609372 | 0,52  | 0,850171327 | 0,12  | 0,881575533 | 0,11  | 0,937446198 |
| lgsf8      | -0,03 | 0,97839288  | -0,6  | 0,163435114 | 0,51  | 0,433682567 | 0,87  | 0,252764465 | -0,47 | 0,598277181 |
| lgsf9      | -0,02 | 0,991919022 | 0,21  | 0,912535732 | 0,87  | 0,187549795 | -0,3  | 0,638835652 | -0,77 | 0,266832581 |
| lgsf9b     | -0,05 | 0,910311858 | 0,16  | 0,802788292 | -0,35 | 0,530318769 | -1,02 | 0,066195604 | 0,29  | 0,819072786 |
| lgtp       | 1,73  | 0,205139432 | 1,02  | 0,077861305 | -3,88 | 0,000264008 | 0,62  | 0,151619963 | 1,94  | 0,003900514 |
| lhh        | 0,02  | 0,97300035  | -0,12 | 0,857388191 | 0,02  | 0,985326269 | 0,07  | 0,92755654  | 0,25  | 0,696667476 |
| ligp1      | 0,96  | 0,374169079 | 0,54  | 0,196295439 | -2,25 | 0,002848711 | 0,18  | 0,592457782 | 0,76  | 0,071308985 |
| ligp1b     | 0,22  | 0,579444251 | 0,35  | 0,354604974 | -0,33 | 0,580049353 | -0,01 | 0,990985697 | 0,38  | 0,456564217 |
| lk         | 0,01  | 0,98608257  | 0,13  | 0,765180904 | -0,14 | 0,805783058 | -0,25 | 0,414539918 | -0,05 | 0,948163009 |
| lkbip      | -0,59 | 0,236944071 | -0,65 | 0,498359705 | 0,58  | 0,209534486 | 0,89  | 0,19354502  | -0,02 | 0,990425708 |
| lkbkap     | -0,46 | 0,528638029 | -0,5  | 0,664765388 | 0,91  | 0,108449644 | 0,44  | 0,348881018 | -0,31 | 0,726042963 |
| lkbkb      | 0     | 1           | -0,06 | 0,934602811 | -0,44 | 0,457506381 | -0,25 | 0,453588169 | -0,04 | 0,967522546 |

|         |       |             |       |             |       |             |       |             |       |             |
|---------|-------|-------------|-------|-------------|-------|-------------|-------|-------------|-------|-------------|
| lkbke   | 0,29  | 0,744352714 | -0,1  | 0,940156926 | -0,16 | 0,866141679 | 0,48  | 0,233029034 | -0,25 | 0,680547789 |
| lkbkg   | -0,16 | 0,790449291 | 0,25  | 0,494161701 | -0,52 | 0,661089127 | -0,14 | 0,696837631 | -0,2  | 0,823098095 |
| lkzf1   | -0,02 | 0,984096321 | 0,4   | 0,656294004 | -0,25 | 0,68845998  | -0,63 | 0,170374426 | -0,16 | 0,808178104 |
| lkzf2   | -0,16 | 0,784951771 | -0,08 | 0,952937385 | -0,13 | 0,874730424 | -0,06 | 0,898801714 | -0,21 | 0,728578071 |
| lkzf3   | 0,08  | 0,925019201 | -0,15 | 0,828818891 | -0,67 | 0,48646529  | -0,18 | 0,770159985 | 0,57  | 0,540922938 |
| lkzf4   | 1,49  | 0,074890017 | 1,38  | 0,080612373 | -0,97 | 0,189230724 | -0,35 | 0,418410394 | 1,29  | 0,065905076 |
| lkzf5   | 0,37  | 0,366909209 | 0,4   | 0,366789691 | 0,38  | 0,675320774 | -0,34 | 0,327891881 | 0,15  | 0,844265172 |
| ll10    | 0,54  | 0,659879365 | 0,13  | 0,948441665 | 0,04  | 0,979791644 | 0,55  | 0,48505774  | 0,18  | 0,880656145 |
| ll10ra  | -0,08 | 0,925510521 | -0,13 | 0,915282997 | 0,33  | 0,633606377 | 0,28  | 0,529943394 | 0,16  | 0,7954544   |
| ll10rb  | -0,04 | 0,936139343 | -0,25 | 0,613780894 | 0,32  | 0,740579016 | -1,08 | 0,039721616 | -0,3  | 0,590339443 |
| ll11    | 0,59  | 0,357054834 | 0,12  | 0,868234125 | 0,83  | 0,379638471 | -0,37 | 0,452183189 | -0,21 | 0,757428993 |
| ll11ra2 | 0,57  | 0,385512506 | 0,28  | 0,858064544 | 0,08  | 0,972165545 | 0,02  | 0,991962381 | -0,16 | 0,872443959 |
| ll12a   | -0,22 | 0,822613889 | -0,24 | 0,800029853 | -0,18 | 0,834069966 | 0,16  | 0,832265679 | 0,24  | 0,798557252 |
| ll12b   | 0,58  | 0,509815996 | 0,36  | 0,431022747 | -0,05 | 0,956570063 | -0,29 | 0,52191788  | 0,16  | 0,831834722 |
| ll12rb1 | 1,56  | 0,069529862 | 1,29  | 0,136079737 | -1,15 | 0,085429661 | 0,6   | 0,271968186 | -0,09 | 0,937196883 |
| ll12rb2 | 3,57  | 0,01522448  | 0,2   | 0,845663274 | -1,7  | 0,103280223 | 0,23  | 0,566580155 | 0,39  | 0,554975763 |
| ll13    | 0,11  | 0,846447446 | 0,1   | 0,881931938 | 0,13  | 0,946806904 | -0,22 | 0,591821065 | -0,16 | 0,799199452 |
| ll13ra1 | 0,75  | 0,074890017 | 0,6   | 0,262609095 | -0,21 | 0,733092626 | 1,09  | 0,064018281 | 0,37  | 0,559132684 |
| ll13ra2 | -0,34 | 0,516601454 | -0,37 | 0,618895172 | -0,04 | 0,972196509 | 0,48  | 0,235275284 | 0,57  | 0,419557334 |
| ll15    | 2,45  | 0,053789028 | 2,41  | 0,040620931 | -2,35 | 0,007179133 | -0,04 | 0,958240929 | 1,24  | 0,038958591 |
| ll15ra  | 0,54  | 0,470287159 | 0,37  | 0,764037194 | -0,75 | 0,211244596 | -0,63 | 0,163529439 | 0,18  | 0,841325973 |
| ll16    | -0,17 | 0,876141257 | -0,22 | 0,738762579 | -0,2  | 0,772883091 | 0,03  | 0,968371235 | -0,43 | 0,545166604 |
| ll17a   | -0,14 | 0,87350924  | 0,08  | 0,901001142 | -0,39 | 0,653622586 | -0,22 | 0,820745707 | 0,06  | 0,977903513 |
| ll17b   | 0,01  | 0,993810522 | 0,38  | 0,52481898  | 0,04  | 0,967930981 | -0,19 | 0,635352663 | 0,19  | 0,763240477 |
| ll17c   | -0,04 | 0,959044734 | -0,08 | 0,931001523 | -0,21 | 0,790538695 | -0,34 | 0,654456231 | -0,22 | 0,868767214 |
| ll17d   | 0,13  | 0,783200207 | -0,1  | 0,900801202 | -0,09 | 0,898935616 | -0,09 | 0,832265679 | 0,12  | 0,89761151  |
| ll17f   | -0,25 | 0,633284194 | -0,24 | 0,786394409 | -0,05 | 0,969928932 | 0,27  | 0,60775425  | -0,04 | 0,97683359  |
| ll17ra  | 0,12  | 0,897717279 | 0,29  | 0,627386884 | 0,25  | 0,712697139 | -0,72 | 0,139621151 | -0,06 | 0,947257822 |
| ll17rb  | 0,01  | 0,996219097 | -0,06 | 0,915282997 | 0     | 0,999931921 | 0,49  | 0,155839442 | 0,33  | 0,692754209 |
| ll17rc  | 0,13  | 0,874335591 | 0,36  | 0,49125334  | -0,19 | 0,711618605 | 0,3   | 0,584835634 | 0,34  | 0,726042963 |
| ll17rd  | -0,37 | 0,540951867 | -0,35 | 0,538642201 | -0,08 | 0,938322304 | -0,35 | 0,418504486 | -0,28 | 0,735565325 |
| ll17re  | 0,12  | 0,886741208 | -0,11 | 0,864363741 | 0,09  | 0,907028836 | 0,1   | 0,919126119 | 0,04  | 0,975441362 |
| ll18    | 1,04  | 0,493929    | 1,46  | 0,487477927 | 1,1   | 0,27037497  | -0,21 | 0,807985473 | 0,48  | 0,68987325  |
| ll18bp  | 1,07  | 0,185926518 | 0,91  | 0,087435995 | -1,76 | 0,014622126 | -0,43 | 0,319309383 | 2,23  | 0,003093895 |
| ll18r1  | -0,01 | 0,986380203 | -0,3  | 0,6878885   | -0,6  | 0,536233444 | -0,23 | 0,798222195 | -0,18 | 0,860759487 |

|          |       |             |       |             |       |             |       |             |       |             |
|----------|-------|-------------|-------|-------------|-------|-------------|-------|-------------|-------|-------------|
| II18rap  | 1,56  | 0,018738684 | 1,54  | 0,222342232 | -0,22 | 0,894018349 | 0,57  | 0,397797098 | -0,01 | 0,989470761 |
| II19     | 0,2   | 0,640236418 | -0,24 | 0,857732355 | 0,26  | 0,740252022 | 0,43  | 0,504754586 | 0,3   | 0,728388857 |
| II1a     | -0,46 | 0,608307071 | 0,1   | 0,958515609 | 0,97  | 0,543175353 | -0,74 | 0,13409404  | 1,08  | 0,201954602 |
| II1b     | 0,46  | 0,653488514 | -0,41 | 0,808422093 | -0,25 | 0,92209712  | 1,46  | 0,102737589 | 0,14  | 0,914183752 |
| II1bos   | 0,27  | 0,560461791 | -0,26 | 0,864363741 | 0,03  | 0,987390039 | 0,11  | 0,908916282 | -0,14 | 0,890297784 |
| II1f10   | -0,48 | 0,302609278 | 0,26  | 0,758387553 | 0,64  | 0,347309312 | 0,18  | 0,776545078 | 0,34  | 0,712121015 |
| II1f5    | 0,25  | 0,707070061 | -0,6  | 0,424863079 | 0,26  | 0,589982818 | 0,14  | 0,922275195 | -0,21 | 0,891925115 |
| II1f6    | 0,23  | 0,721134093 | -0,05 | 0,926655316 | -0,44 | 0,425782502 | 0,25  | 0,531102771 | 0,2   | 0,761144375 |
| II1f8    | 0,31  | 0,552331623 | -0,02 | 0,983071427 | 0,08  | 0,904294353 | 0,27  | 0,58168661  | 0,06  | 0,959592518 |
| II1f9    | 0,01  | 0,990132318 | -0,31 | 0,660316248 | -0,09 | 0,979791644 | 0,47  | 0,427171447 | 0,29  | 0,605816363 |
| II1r1    | -0,97 | 0,167126406 | -0,34 | 0,654099591 | 1,1   | 0,168170957 | 0,46  | 0,221934349 | -1,11 | 0,241394095 |
| II1r2    | 0,16  | 0,891753687 | -0,44 | 0,536497064 | 0,89  | 0,661101947 | 0,52  | 0,406031453 | 0,14  | 0,884248437 |
| II1rap   | -0,43 | 0,625573018 | -0,62 | 0,716668427 | 0,99  | 0,077593596 | 1,02  | 0,308218931 | -0,37 | 0,731865047 |
| II1rapl1 | 0,27  | 0,636840455 | 0,05  | 0,957399989 | 0,19  | 0,733423502 | 0,21  | 0,703803198 | 0,32  | 0,635102193 |
| II1rapl2 | 0,42  | 0,536911591 | 0,4   | 0,58591598  | 0,34  | 0,573538604 | -0,52 | 0,195886404 | 0,07  | 0,934636927 |
| II1rl1   | -0,29 | 0,645057952 | -0,29 | 0,619510987 | -0,19 | 0,903491788 | 0,33  | 0,493485636 | 0,28  | 0,769225414 |
| II1rl2   | -0,78 | 0,434470332 | 0,07  | 0,984812702 | 0,4   | 0,598179126 | 1,15  | 0,048378136 | 0,25  | 0,865258929 |
| II1rn    | 0,39  | 0,736327236 | 0,06  | 0,985151214 | 1,11  | 0,578720052 | 0,33  | 0,69271453  | 0,25  | 0,853254359 |
| II2      | 0,34  | 0,597519827 | -0,06 | 0,940507154 | -0,25 | 0,616190315 | -0,15 | 0,789516436 | 0,11  | 0,883738739 |
| II20     | 0,16  | 0,834062579 | 0,05  | 0,974702154 | -0,21 | 0,751090942 | 0,27  | 0,661916932 | 0,04  | 0,970154126 |
| II20ra   | 0,04  | 0,976898152 | -0,13 | 0,823859284 | -0,27 | 0,647006895 | -0,04 | 0,938689944 | 0,24  | 0,68987325  |
| II20rb   | -0,07 | 0,911800803 | -0,49 | 0,507054817 | 0,9   | 0,138993675 | 0,63  | 0,31907261  | -0,33 | 0,712121015 |
| II21     | -0,07 | 0,907592507 | -0,26 | 0,733759208 | 0,16  | 0,835677021 | -0,05 | 0,96560921  | 0,46  | 0,535065209 |
| II21r    | -0,8  | 0,302609278 | 0,1   | 0,956049982 | 0,23  | 0,864411302 | 0,39  | 0,302214149 | 0,35  | 0,640616198 |
| II22     | 0     | 0,999288019 | -0,61 | 0,258971929 | -0,19 | 0,922318683 | -0,49 | 0,533941098 | -0,2  | 0,911850421 |
| II22ra1  | 0,01  | 0,989925592 | 0,1   | 0,842793123 | 0,17  | 0,898935616 | 0,57  | 0,136818179 | 0,74  | 0,188547767 |
| II22ra2  | 0,06  | 0,935499647 | 0,2   | 0,614530823 | -0,36 | 0,611145451 | 0,08  | 0,87148686  | -0,07 | 0,940438527 |
| II23a    | 0,44  | 0,601276046 | -0,32 | 0,882589938 | 0,86  | 0,333333292 | 0,62  | 0,512311402 | 0,37  | 0,579739537 |
| II23r    | 0,05  | 0,964272364 | 0,28  | 0,763796207 | -0,38 | 0,723889069 | -0,16 | 0,813486143 | 0,85  | 0,611935556 |
| II24     | -0,1  | 0,94756262  | -0,44 | 0,521714319 | 0,3   | 0,890405742 | 0,61  | 0,495340036 | 0,74  | 0,359850349 |
| II25     | -0,01 | 0,985886594 | -0,05 | 0,919873208 | 0,11  | 0,851685565 | 0,01  | 0,989314626 | -0,08 | 0,933307994 |
| II27     | 1,08  | 0,024768323 | 1,75  | 0,180045682 | -0,06 | 0,969928932 | 0,9   | 0,157857546 | 0,52  | 0,53037695  |
| II27ra   | -0,49 | 0,438318142 | -0,03 | 0,970762922 | 0,39  | 0,669340282 | -0,13 | 0,732505868 | -0,85 | 0,083660756 |
| II2ra    | 0,36  | 0,55640978  | -0,08 | 0,916730432 | -0,05 | 0,982736769 | -0,31 | 0,647287835 | 0,5   | 0,702558142 |
| II2rb    | -0,96 | 0,1462515   | 0,31  | 0,855702031 | -1,2  | 0,513307287 | -1,22 | 0,110283581 | 0,4   | 0,712121015 |

|         |       |             |       |             |       |             |       |             |       |             |
|---------|-------|-------------|-------|-------------|-------|-------------|-------|-------------|-------|-------------|
| II2rg   | 0,06  | 0,91409989  | 0,13  | 0,791519472 | -0,15 | 0,820614211 | 0,88  | 0,033601178 | 0,57  | 0,223717572 |
| II3     | 0     | 0,999172176 | -0,3  | 0,568187167 | -0,34 | 0,688126003 | 0,02  | 0,977864608 | -0,42 | 0,390793689 |
| II31    | 0,05  | 0,919110324 | -0,23 | 0,688435265 | -0,04 | 0,958077939 | 0     | 0,999088676 | 0,17  | 0,836061657 |
| II31ra  | -0,06 | 0,939989529 | 0,28  | 0,700297886 | 0,23  | 0,771789829 | 0,11  | 0,785027978 | -0,08 | 0,940438527 |
| II33    | 0,21  | 0,687662951 | -0,06 | 0,925520621 | -0,22 | 0,775163644 | -4,72 | 0,00219426  | -1,11 | 0,03817864  |
| II34    | 0,04  | 0,98137065  | 0,27  | 0,733708652 | 0,33  | 0,761861872 | -0,63 | 0,352509395 | -0,41 | 0,627973105 |
| II3ra   | 0,15  | 0,77354475  | 0,07  | 0,919873208 | -0,54 | 0,493914485 | 0,52  | 0,265568899 | 0,48  | 0,389664866 |
| II4     | 0,08  | 0,925497656 | 0     | 1           | -0,16 | 0,838289412 | 0,26  | 0,422312369 | -0,1  | 0,925858284 |
| II4i1   | 0,34  | 0,659860831 | 0,16  | 0,810340604 | -0,08 | 0,929871006 | -0,19 | 0,692483691 | -0,42 | 0,653705362 |
| II4ra   | 0,75  | 0,089282283 | 0,01  | 0,996865461 | -0,16 | 0,809137779 | 0,76  | 0,066524162 | 0,42  | 0,383190821 |
| II5     | -0,39 | 0,656034838 | -0,43 | 0,562912319 | -0,09 | 0,914745475 | -0,24 | 0,770633903 | -0,52 | 0,652437121 |
| II5ra   | 0,05  | 0,947630317 | 0,36  | 0,716668427 | 0,12  | 0,849027937 | -0,2  | 0,779059536 | -0,06 | 0,954565959 |
| II6     | 1,48  | 0,077161113 | 0,94  | 0,185367049 | 0,37  | 0,781713462 | 0,56  | 0,234301092 | 1,43  | 0,021468057 |
| II6ra   | 0,87  | 0,355622782 | 1,01  | 0,080612373 | 0,2   | 0,90345282  | -0,14 | 0,86946471  | 1,36  | 0,018894828 |
| II6st   | 0,27  | 0,468384373 | 0,38  | 0,370515616 | 0,14  | 0,867589536 | -0,23 | 0,547560357 | 0,26  | 0,655956123 |
| II7     | -0,29 | 0,803010925 | -0,21 | 0,852563873 | -0,55 | 0,674253263 | 0,6   | 0,48505774  | 0,73  | 0,469148703 |
| II7r    | -0,37 | 0,789385646 | 0,14  | 0,901000778 | -0,4  | 0,804607903 | -0,76 | 0,348565724 | -0,03 | 0,990091016 |
| II9     | 0,06  | 0,95837965  | 0,03  | 0,989327073 | 0,02  | 0,986912078 | 0,14  | 0,825899927 | 0,05  | 0,963223617 |
| II9r    | 0,25  | 0,673583263 | -0,1  | 0,880362561 | -0,32 | 0,69871815  | 0,08  | 0,901473719 | 0,27  | 0,643580968 |
| IIldr1  | 0,43  | 0,379426903 | -0,23 | 0,749366654 | -0,18 | 0,735003288 | 0,16  | 0,76240803  | 0,09  | 0,94381044  |
| IIldr2  | -1,68 | 0,161138881 | -1,26 | 0,084290601 | 1,25  | 0,036818657 | 2,23  | 0,011041643 | -0,37 | 0,570939418 |
| IIlf2   | -0,48 | 0,451391787 | -0,64 | 0,2014299   | 0,71  | 0,337509636 | 0,48  | 0,178931682 | -0,11 | 0,864415219 |
| IIlf3   | -0,47 | 0,212091984 | -0,08 | 0,883145635 | 0,33  | 0,676780195 | 0,08  | 0,818318954 | -0,06 | 0,942854766 |
| IIlk    | -0,2  | 0,61200942  | 0     | 1           | -0,08 | 0,933097705 | 0,15  | 0,66607213  | -0,12 | 0,861977667 |
| IIlkap  | -0,08 | 0,939317944 | -0,22 | 0,666450149 | -0,3  | 0,68845998  | -0,18 | 0,75555577  | 0,32  | 0,635906052 |
| IIlifb  | -0,4  | 0,568104198 | -0,15 | 0,81745681  | -0,19 | 0,841669036 | 0,01  | 0,992906132 | -0,48 | 0,577808038 |
| IIlvbl  | 0,02  | 0,983516046 | 0,11  | 0,855632384 | 0,19  | 0,831139996 | 0,13  | 0,808183592 | -0,13 | 0,869831411 |
| IImp11  | 0,18  | 0,689725397 | -0,21 | 0,664787536 | -0,17 | 0,809137779 | -0,09 | 0,83687014  | 0,1   | 0,885777129 |
| IImp21  | -0,52 | 0,539078421 | -0,12 | 0,894205636 | -0,24 | 0,727262258 | -0,69 | 0,430056151 | 0,42  | 0,655912577 |
| IIfmt   | -0,32 | 0,568104198 | -0,2  | 0,661566887 | 0,3   | 0,561271294 | -0,01 | 0,992906132 | -0,12 | 0,877021938 |
| IImp3   | 0     | 0,996219097 | 0,12  | 0,813558323 | 0,18  | 0,789902399 | -0,03 | 0,956015204 | 0,03  | 0,977108704 |
| IImp4   | -0,57 | 0,192706435 | -0,44 | 0,256832878 | 0,37  | 0,504301089 | 0,12  | 0,785398535 | -0,04 | 0,958259949 |
| IImpa1  | 0,42  | 0,458670096 | 0,18  | 0,832841509 | -0,35 | 0,532712484 | 0,4   | 0,451950778 | 0,43  | 0,574516113 |
| IImpa2  | -0,76 | 0,321600657 | -0,43 | 0,575260771 | 0,71  | 0,474169312 | 0,54  | 0,322422333 | -0,55 | 0,521691028 |
| IImpact | 0,36  | 0,602178519 | 0,45  | 0,574343122 | -0,13 | 0,922318683 | -1,43 | 0,076498634 | 0,17  | 0,794586838 |

|          |       |             |       |             |       |             |       |             |       |             |
|----------|-------|-------------|-------|-------------|-------|-------------|-------|-------------|-------|-------------|
| Impad1   | -0,65 | 0,214430522 | 0,05  | 0,977204386 | 0,66  | 0,186615237 | 0,08  | 0,943082209 | -0,44 | 0,702558142 |
| Impdh1   | -0,54 | 0,193452077 | -0,52 | 0,490650707 | 0,48  | 0,650209869 | 0,47  | 0,592457782 | -0,95 | 0,247686562 |
| Impdh2   | -0,46 | 0,242076986 | -0,4  | 0,411732776 | 0,73  | 0,228643094 | 0,21  | 0,794262741 | 0,11  | 0,921173407 |
| Impg1    | 0,24  | 0,803761785 | 0,41  | 0,640299669 | -0,36 | 0,548288344 | -0,32 | 0,365687993 | 0,37  | 0,419557334 |
| Impg2    | -0,16 | 0,84900712  | 0,35  | 0,750378621 | -0,29 | 0,676675094 | -0,23 | 0,654016303 | 0,02  | 0,984125319 |
| Ina      | 0,23  | 0,695313784 | -0,18 | 0,882847123 | 0,08  | 0,910060392 | 0,49  | 0,246648596 | 0,55  | 0,416589898 |
| Inadl    | -0,47 | 0,462826069 | -0,01 | 0,986782918 | 1,17  | 0,116607178 | -0,33 | 0,3550569   | -0,35 | 0,540089233 |
| Inafm1   | -0,64 | 0,44459575  | -0,16 | 0,809024879 | 0,14  | 0,895819764 | -0,2  | 0,690442683 | -0,12 | 0,895579031 |
| Inafm2   | -0,14 | 0,72989626  | 0     | 0,999210601 | 0,11  | 0,881461218 | 0,03  | 0,949239972 | -0,26 | 0,628127128 |
| Inca1    | -0,32 | 0,356810943 | 0,11  | 0,926353869 | 0,33  | 0,569619692 | 0,67  | 0,232954672 | 0,44  | 0,724989754 |
| Incenp   | -1,04 | 0,059686542 | -1,49 | 0,087315688 | 0,72  | 0,208091516 | 1,7   | 0,093418481 | -0,51 | 0,642726581 |
| Inf2     | 0,12  | 0,84241758  | -0,43 | 0,582478031 | 0,51  | 0,246580815 | 0,37  | 0,528672567 | -0,18 | 0,818041383 |
| Ing1     | -0,42 | 0,273563517 | -0,31 | 0,43105638  | 0     | 0,999571656 | -0,35 | 0,418317818 | -0,25 | 0,673120647 |
| Ing2     | -0,43 | 0,358823255 | 0,41  | 0,571026746 | -0,4  | 0,612816824 | -0,34 | 0,694518651 | -0,17 | 0,914176188 |
| Ing3     | -0,21 | 0,668513659 | 0,21  | 0,722740625 | -0,29 | 0,715497532 | -0,21 | 0,749306304 | -0,11 | 0,939127163 |
| Ing4     | 0,08  | 0,924561835 | 0     | 1           | 0,09  | 0,922274387 | -0,28 | 0,42380232  | -0,18 | 0,766559546 |
| Ing5     | -0,11 | 0,878571032 | 0,04  | 0,959209847 | -0,36 | 0,638614862 | -0,17 | 0,739085734 | 0,27  | 0,712121015 |
| Inha     | 0,12  | 0,859044359 | 0,17  | 0,732731157 | -0,21 | 0,777918093 | -0,21 | 0,545051688 | -0,44 | 0,329423825 |
| Inhba    | -0,25 | 0,898746854 | 0,35  | 0,735689605 | 0,68  | 0,565872135 | -0,3  | 0,77372709  | 0     | 0,99981982  |
| Inhbb    | -0,43 | 0,264937591 | -0,2  | 0,683509429 | 0,05  | 0,964659521 | 0,96  | 0,242250704 | -0,22 | 0,885872093 |
| Inhbc    | 0,37  | 0,525412673 | 0,11  | 0,875296321 | -0,07 | 0,93830464  | -0,12 | 0,845158011 | -0,06 | 0,961251206 |
| Inhbe    | 0,47  | 0,477363665 | 0,08  | 0,941609372 | 0,17  | 0,749607234 | -0,21 | 0,660308882 | -0,34 | 0,651556539 |
| Inip     | -0,2  | 0,767797797 | 0,17  | 0,716531657 | -0,44 | 0,530603857 | -0,35 | 0,754580105 | 0,21  | 0,890833196 |
| Inmt     | -0,19 | 0,80740201  | -0,23 | 0,847483504 | 0,84  | 0,435556279 | -0,41 | 0,795911056 | -0,33 | 0,878930105 |
| Ino80    | -0,01 | 0,992406613 | 0,05  | 0,960594252 | -0,35 | 0,628048897 | 0,42  | 0,552551232 | 0,29  | 0,755677288 |
| Ino80b   | 0,04  | 0,965703244 | 0,11  | 0,903504389 | 0,4   | 0,370554673 | -0,34 | 0,376725766 | -0,29 | 0,642685227 |
| Ino80c   | 0     | 0,998017023 | 0,26  | 0,770521007 | 0,65  | 0,332905005 | 0,66  | 0,114645262 | 0,47  | 0,428613647 |
| Ino80d   | 0,16  | 0,727137147 | 0,34  | 0,672416139 | -0,12 | 0,867654013 | -0,48 | 0,325923875 | -0,04 | 0,968130547 |
| Ino80dos | 0,24  | 0,864526424 | 0,36  | 0,766425161 | -0,22 | 0,828643779 | -0,96 | 0,598432413 | -0,01 | 0,994468782 |
| Ino80e   | -0,25 | 0,717502566 | -0,22 | 0,688450928 | -0,05 | 0,944078985 | 0,27  | 0,535068233 | -0,05 | 0,957993472 |
| Inpp1    | 0,3   | 0,605238975 | 0,88  | 0,153832724 | -0,31 | 0,757627821 | -0,28 | 0,476986331 | 0,24  | 0,751268314 |
| Inpp4a   | 0,06  | 0,932531737 | -0,11 | 0,905882252 | -0,17 | 0,867571963 | -0,73 | 0,086671863 | -0,12 | 0,867451665 |
| Inpp4b   | -0,35 | 0,648730873 | -0,81 | 0,282216981 | 0,82  | 0,308684702 | -2,31 | 0,007959966 | -1,03 | 0,063531079 |
| Inpp5a   | 0,4   | 0,376797035 | 0,57  | 0,242323765 | -0,4  | 0,465949919 | -0,33 | 0,383221502 | 0,37  | 0,574198136 |
| Inpp5b   | 0,24  | 0,612186892 | 0,27  | 0,516521919 | 0,18  | 0,887630371 | -0,31 | 0,85072326  | -0,03 | 0,990191074 |



|        |       |             |       |             |       |             |       |             |       |             |
|--------|-------|-------------|-------|-------------|-------|-------------|-------|-------------|-------|-------------|
| Inpp5d | -0,03 | 0,973083012 | -0,29 | 0,735746381 | -0,1  | 0,946046271 | -0,4  | 0,421116104 | -0,71 | 0,122922652 |
| Inpp5e | -0,48 | 0,527262065 | 0,1   | 0,915358263 | 0,17  | 0,804784019 | -0,09 | 0,908753395 | -0,63 | 0,37843861  |
| Inpp5f | 0,21  | 0,833900133 | 0,28  | 0,622342973 | -0,16 | 0,868590766 | 0,1   | 0,938387989 | -0,05 | 0,975651837 |
| Inpp5j | -0,18 | 0,80631019  | -0,11 | 0,882589938 | 0,38  | 0,454304301 | -0,07 | 0,910298592 | 0     | 0,997070668 |
| Inpp5k | -0,12 | 0,810208393 | 0,5   | 0,241189065 | -0,26 | 0,628427952 | -1,43 | 0,019419918 | -0,43 | 0,417370658 |
| Inpp1l | -0,04 | 0,963708419 | -0,13 | 0,756369219 | 0,26  | 0,787094995 | 0,55  | 0,432401333 | 0,05  | 0,97425848  |
| Ins1   | 0,02  | 0,980720069 | -0,22 | 0,82505545  | -0,11 | 0,856046789 | 0,05  | 0,943508556 | 0     | 0,997514904 |
| Ins2   | 0,16  | 0,73558603  | 0,06  | 0,955475499 | -0,28 | 0,596163134 | -0,13 | 0,806596364 | 0,01  | 0,992980215 |
| Insc   | 0,01  | 0,987965359 | 0,52  | 0,462039435 | 0,27  | 0,599222964 | 0,27  | 0,645719738 | 0,19  | 0,876418697 |
| Insig1 | -0,86 | 0,078114626 | -0,52 | 0,535886648 | 0,5   | 0,267775564 | 0,28  | 0,663950892 | 0,39  | 0,590396118 |
| Insig2 | -0,09 | 0,859258492 | 0,36  | 0,39417494  | 0,27  | 0,613496662 | -0,38 | 0,40426262  | 0,12  | 0,87645265  |
| Insl5  | 0,03  | 0,984133097 | 0,05  | 0,988427154 | -0,05 | 0,981082114 | 0,13  | 0,927360713 | 0,16  | 0,94919447  |
| Insl6  | 1,12  | 0,446685156 | 0,56  | 0,666285906 | -0,31 | 0,88515397  | 0,52  | 0,572900056 | 1,73  | 0,042786521 |
| Insm1  | 0,01  | 0,995438679 | -0,01 | 0,996495216 | 0,29  | 0,544583457 | 0,15  | 0,665933714 | -0,05 | 0,953297732 |
| Insm2  | -0,37 | 0,54401985  | 0,27  | 0,790272515 | -0,14 | 0,8271738   | 0,09  | 0,816490204 | 0,23  | 0,763130301 |
| Insr   | -0,42 | 0,433492052 | -0,53 | 0,214249289 | -0,07 | 0,940131381 | 0,25  | 0,537559    | -0,18 | 0,862867603 |
| Insr   | -0,02 | 0,976870178 | -0,24 | 0,615311543 | -0,58 | 0,3295749   | 0,33  | 0,383836854 | 0,59  | 0,489004857 |
| Ints1  | -0,06 | 0,940514265 | -0,2  | 0,680709276 | 0,64  | 0,138915123 | 0,1   | 0,785981962 | -0,5  | 0,298407315 |
| Ints10 | -0,36 | 0,499007529 | -0,41 | 0,513975715 | 0,21  | 0,846510291 | 0,56  | 0,390808076 | -0,45 | 0,63025793  |
| Ints12 | -0,08 | 0,891986094 | -0,04 | 0,977463004 | 0,01  | 0,997220401 | -0,31 | 0,750956508 | 0,59  | 0,566248044 |
| Ints2  | 0,17  | 0,833606844 | -0,27 | 0,722766419 | 0,66  | 0,682309944 | 1,25  | 0,021666564 | -0,48 | 0,765327693 |
| Ints3  | -0,4  | 0,373662022 | -0,48 | 0,323278688 | 0,63  | 0,229145687 | 0,3   | 0,616493273 | -0,3  | 0,681251409 |
| Ints4  | -0,17 | 0,770253953 | -0,3  | 0,614530823 | 0,21  | 0,813895207 | 0,34  | 0,619134782 | 0,23  | 0,810276195 |
| Ints5  | -0,27 | 0,689966234 | 0,06  | 0,959454907 | 0,61  | 0,215429632 | -0,29 | 0,589663381 | -0,25 | 0,700466496 |
| Ints6  | 0     | 0,998017023 | 0,01  | 0,998237793 | 0,26  | 0,869952072 | -0,2  | 0,874904932 | 0,35  | 0,800067764 |
| Ints7  | -0,31 | 0,625573018 | -0,63 | 0,249103754 | 0,81  | 0,343594254 | 0,84  | 0,10874178  | -0,77 | 0,286600165 |
| Ints8  | -0,76 | 0,184172097 | -0,24 | 0,855820898 | 0,18  | 0,902672106 | 0,14  | 0,90213506  | 0,37  | 0,712793529 |
| Ints9  | 0,15  | 0,797808487 | -0,16 | 0,815973308 | -0,27 | 0,715497532 | 0,47  | 0,4276043   | 0,22  | 0,794582962 |
| Intu   | 0,41  | 0,470166881 | -0,29 | 0,747928263 | 0,03  | 0,988734862 | 0,14  | 0,774826947 | 0,02  | 0,99004065  |
| Invs   | -0,38 | 0,436086286 | 0,24  | 0,67187703  | -0,55 | 0,343594254 | -0,31 | 0,701833862 | -0,79 | 0,304573171 |
| lp6k1  | 0,06  | 0,92366013  | 0,06  | 0,958974534 | 0,1   | 0,932577939 | -0,3  | 0,704328661 | -0,09 | 0,926008345 |
| lp6k2  | -0,75 | 0,430696208 | 0,45  | 0,494161701 | 0,13  | 0,915321116 | 0     | 1           | -0,4  | 0,776907684 |
| lp6k3  | -0,28 | 0,64776317  | -0,08 | 0,892194304 | -0,63 | 0,332905005 | -1,34 | 0,120672918 | -0,09 | 0,947437555 |
| lpcef1 | 0,13  | 0,881314657 | -0,16 | 0,801513852 | 0,09  | 0,922318683 | -0,46 | 0,497404577 | -0,53 | 0,494369363 |
| lpmk   | -0,04 | 0,959985598 | 0,01  | 0,999395995 | -0,18 | 0,842960684 | 0,57  | 0,143091816 | 0,08  | 0,939948423 |

|          |       |             |       |             |       |             |       |             |       |             |
|----------|-------|-------------|-------|-------------|-------|-------------|-------|-------------|-------|-------------|
| lpo11    | -0,84 | 0,242651292 | -0,66 | 0,470430135 | 0,26  | 0,737241227 | 0,18  | 0,909873635 | -0,3  | 0,849560772 |
| lpo13    | -0,12 | 0,846313357 | -0,14 | 0,802706769 | 0,27  | 0,683633656 | 0,04  | 0,943361276 | -0,06 | 0,946685713 |
| lpo4     | -0,48 | 0,268112899 | -0,61 | 0,213731156 | 0,08  | 0,923520317 | 0,81  | 0,111115969 | -0,23 | 0,760587652 |
| lpo5     | -0,34 | 0,465168175 | -0,41 | 0,383826859 | 0,29  | 0,54553349  | 1,37  | 0,065063652 | 0,4   | 0,586518737 |
| lpo7     | -0,18 | 0,680520303 | -0,02 | 0,986915143 | -0,03 | 0,967930981 | 1,03  | 0,038935822 | 0,37  | 0,51269988  |
| lpo8     | -0,41 | 0,421029929 | -0,09 | 0,934294134 | 1,73  | 0,056888083 | -0,3  | 0,600327685 | -0,31 | 0,652437121 |
| lpo9     | -0,7  | 0,182425433 | -0,4  | 0,429168189 | 0,14  | 0,857413978 | 1,36  | 0,133098891 | -0,13 | 0,925898218 |
| lpp      | -0,18 | 0,932335619 | 0,47  | 0,665804894 | -0,34 | 0,659555232 | -0,27 | 0,888267343 | 0,31  | 0,91252831  |
| lppk     | 0,63  | 0,27550648  | -0,51 | 0,51825831  | 0,92  | 0,272465667 | -0,35 | 0,765338637 | -0,46 | 0,694233384 |
| lpw      | 0,25  | 0,731173847 | -0,14 | 0,846012678 | 0,22  | 0,809009111 | 0,13  | 0,765911385 | -0,14 | 0,861174316 |
| lqca     | -0,03 | 0,969010989 | -0,06 | 0,909161274 | -0,26 | 0,706037144 | 0,28  | 0,639359737 | 0,33  | 0,612321677 |
| lqcb1    | 0,34  | 0,631796741 | 0,12  | 0,878701681 | 0,26  | 0,712697139 | -0,59 | 0,131658507 | 0,01  | 0,992370267 |
| lqcc     | -0,58 | 0,438932987 | 0,08  | 0,91395667  | 0,67  | 0,14251251  | -0,91 | 0,278545889 | -0,32 | 0,830813323 |
| lqcd     | -0,01 | 0,991919022 | 0,14  | 0,815973308 | 0,16  | 0,840657513 | -0,18 | 0,629687493 | -0,4  | 0,498598092 |
| lqce     | 0,09  | 0,893137556 | 0,05  | 0,959837002 | 0,54  | 0,548190257 | -0,26 | 0,762802322 | -0,64 | 0,562804651 |
| lqcf1    | 0,28  | 0,421957622 | -0,1  | 0,915299422 | -0,06 | 0,947316802 | 0,21  | 0,578387136 | 0,13  | 0,845276382 |
| lqcf3    | -0,3  | 0,594945461 | 0,32  | 0,639133791 | 0,14  | 0,895591227 | -0,1  | 0,87811903  | 0,12  | 0,890882575 |
| lqcf4    | 0,26  | 0,625573018 | -0,23 | 0,709432782 | -0,28 | 0,66794669  | -0,21 | 0,641012887 | -0,08 | 0,935708361 |
| lqcf5    | 0,16  | 0,720561066 | -0,11 | 0,819802664 | -0,22 | 0,709846532 | 0,39  | 0,326939767 | -0,01 | 0,992607235 |
| lqcf6    | -0,14 | 0,783200207 | 0,04  | 0,944438314 | 0,08  | 0,90914497  | 0,29  | 0,39527702  | 0,06  | 0,939607682 |
| lqcg     | -0,11 | 0,859044359 | 0,05  | 0,935345966 | 0,49  | 0,591420507 | 1,58  | 0,016289737 | 0,62  | 0,395349481 |
| lqch     | 0,85  | 0,269026142 | -0,54 | 0,473876926 | 0,42  | 0,578774311 | 0,86  | 0,307744759 | 0,15  | 0,932021678 |
| lqcj     | -0,03 | 0,98456417  | 0,02  | 0,992175086 | -0,5  | 0,38575085  | 0,29  | 0,806500539 | 0,12  | 0,939448119 |
| lqck     | -0,22 | 0,686076441 | -0,3  | 0,606272752 | -0,18 | 0,834069966 | -0,22 | 0,811006924 | -0,14 | 0,938946639 |
| lqgap1   | -0,23 | 0,578621914 | -0,12 | 0,831685312 | 0,41  | 0,552409541 | 0,23  | 0,575211111 | 0,07  | 0,934745577 |
| lqgap2   | -0,19 | 0,803557792 | 0,86  | 0,173713363 | -0,08 | 0,960345802 | -0,97 | 0,170353959 | -0,29 | 0,849922485 |
| lqgap3   | -0,65 | 0,42935185  | -1,34 | 0,205273528 | 0,48  | 0,535944993 | 1,98  | 0,012466912 | 0,21  | 0,827532593 |
| lqsec1   | -0,17 | 0,813220024 | 0,28  | 0,754578715 | 0,09  | 0,932986275 | -1,15 | 0,040672569 | -0,88 | 0,270231524 |
| lqsec2   | -0,36 | 0,608235114 | 0,13  | 0,896383881 | -0,17 | 0,88306802  | -0,39 | 0,468566806 | 0,32  | 0,675958562 |
| lqsec3   | 0,17  | 0,750362144 | 0,24  | 0,695265534 | -0,05 | 0,959696615 | -0,04 | 0,963678375 | 0,35  | 0,684256865 |
| lqub     | 0     | 0,998210173 | -0,07 | 0,936837377 | 0,22  | 0,70635953  | -0,14 | 0,870818994 | -0,2  | 0,803450623 |
| Irak1    | 0,24  | 0,833382917 | 0,23  | 0,707838131 | -0,59 | 0,223293599 | -0,47 | 0,176021852 | -0,09 | 0,91423979  |
| Irak1bp1 | 0,63  | 0,393113709 | -0,12 | 0,818301748 | -0,04 | 0,97268496  | -0,8  | 0,276635207 | -0,54 | 0,518538899 |
| Irak2    | 0,18  | 0,704026555 | 0,24  | 0,855394007 | -0,66 | 0,259363098 | -0,62 | 0,454948356 | -0,09 | 0,937558003 |
| Irak3    | 0,09  | 0,932531737 | 0,03  | 0,987867499 | 0,14  | 0,941063967 | -0,83 | 0,143673923 | -0,72 | 0,166187239 |

|         |       |             |       |             |       |             |       |             |       |             |
|---------|-------|-------------|-------|-------------|-------|-------------|-------|-------------|-------|-------------|
| lrak4   | -0,63 | 0,446811495 | 0,21  | 0,617741709 | -0,1  | 0,930442276 | -0,45 | 0,197243924 | -0,54 | 0,319612644 |
| lreb2   | -0,5  | 0,546019769 | -0,14 | 0,911024505 | 0,36  | 0,794830621 | 1,28  | 0,152261034 | 0,13  | 0,948163009 |
| lrf1    | 1,53  | 0,10495459  | 0,94  | 0,084290601 | -2,43 | 0,000205287 | -0,14 | 0,742842947 | 0,89  | 0,060191534 |
| lrf2    | 0,32  | 0,524017783 | 1,02  | 0,195016179 | -0,72 | 0,121057892 | -0,38 | 0,470236257 | 1,11  | 0,053074184 |
| lrf2bp1 | -0,38 | 0,61023876  | 0,06  | 0,949074216 | 0,14  | 0,867589536 | 0,03  | 0,983166423 | -0,12 | 0,940438527 |
| lrf2bp2 | 0,14  | 0,820785667 | 0,19  | 0,716661568 | -0,78 | 0,275656366 | -0,19 | 0,588987424 | 0,05  | 0,962872595 |
| lrf2bpl | -0,79 | 0,107118805 | 0,03  | 0,974580396 | -0,14 | 0,863513869 | -0,97 | 0,118739789 | -0,65 | 0,268016026 |
| lrf3    | -0,11 | 0,87774325  | -0,04 | 0,978455587 | -0,17 | 0,816798168 | -0,58 | 0,244776528 | 0,13  | 0,862456985 |
| lrf4    | 3,98  | 0,020026413 | 4,18  | 0,008008239 | -2,63 | 0,004621866 | 0,22  | 0,502230334 | 0,2   | 0,819345755 |
| lrf5    | -0,02 | 0,98297164  | 0,29  | 0,460950775 | -0,06 | 0,959696615 | 0,72  | 0,097488446 | 0,24  | 0,740350277 |
| lrf6    | -0,15 | 0,855264133 | 0,39  | 0,362188015 | 0,63  | 0,121033211 | -0,76 | 0,120352716 | -0,61 | 0,673145862 |
| lrf7    | 1,14  | 0,074890017 | 1,1   | 0,16121328  | -1,06 | 0,093530523 | -0,78 | 0,092238747 | 1,24  | 0,015389935 |
| lrf8    | 1,24  | 0,104092085 | 1,13  | 0,072228425 | -1,53 | 0,006274682 | 1,31  | 0,078997606 | 2,14  | 0,009546807 |
| lrf9    | 0,16  | 0,829299665 | 0,21  | 0,600177044 | -0,95 | 0,049163833 | -0,95 | 0,098563991 | -0,12 | 0,920355527 |
| lrg1    | 1,35  | 0,450132712 | 1,95  | 0,043236689 | -1,17 | 0,211244596 | 3,5   | 0,005660788 | 2,33  | 0,00601119  |
| lrgc1   | 0,13  | 0,879499432 | -0,24 | 0,614530823 | -0,09 | 0,906301115 | -0,25 | 0,722185959 | -0,35 | 0,684349871 |
| lrgm1   | 1,84  | 0,089458257 | 1,18  | 0,0802723   | -2,37 | 8,49777E-05 | -0,3  | 0,475928042 | 1,06  | 0,026762541 |
| lrgm2   | 1,34  | 0,187002581 | 0,96  | 0,087435995 | -2,32 | 0,00042558  | -0,39 | 0,400786517 | 1,21  | 0,032750472 |
| lrgq    | -0,41 | 0,495265339 | -0,12 | 0,910595744 | 0,03  | 0,978376574 | 0,24  | 0,653462674 | -0,67 | 0,355902071 |
| lrs1    | 0,03  | 0,964272364 | -0,17 | 0,781665479 | -0,15 | 0,841563482 | -0,42 | 0,327334102 | -0,38 | 0,493919589 |
| lrs2    | 0,54  | 0,705457389 | 0,48  | 0,62733885  | 0,66  | 0,247304394 | -3,98 | 0,005660788 | 0,23  | 0,712121015 |
| lrs3    | 0,11  | 0,835334299 | -0,08 | 0,947107147 | -0,13 | 0,863701276 | -0,09 | 0,902706786 | -0,1  | 0,923039028 |
| lrs4    | 0,13  | 0,795481466 | 0,14  | 0,776548278 | -0,1  | 0,86523336  | 0,03  | 0,967758979 | -0,14 | 0,878494412 |
| lrx1    | 0,14  | 0,810145209 | -0,1  | 0,895304965 | -0,31 | 0,501053983 | -0,16 | 0,799835488 | -0,33 | 0,666758661 |
| lrx2    | 0,19  | 0,792328154 | -0,23 | 0,622161495 | 0,23  | 0,773365699 | 0,25  | 0,721995807 | -0,03 | 0,979152939 |
| lrx3    | -0,69 | 0,417482906 | -0,49 | 0,299342025 | 0,15  | 0,906275304 | -3,54 | 0,006896627 | -0,39 | 0,633417089 |
| lrx3os  | -0,07 | 0,928864817 | -0,46 | 0,402393337 | -0,15 | 0,906097666 | -0,66 | 0,140865327 | -0,53 | 0,628728585 |
| lrx4    | -0,01 | 0,984692479 | 0,1   | 0,868010263 | 0,21  | 0,671012215 | -0,2  | 0,707060319 | 0,05  | 0,970154126 |
| lrx5    | 0,09  | 0,895400682 | 0,22  | 0,808222386 | -0,06 | 0,930836343 | -0,44 | 0,25776032  | 0,29  | 0,712793529 |
| lrx6    | -0,02 | 0,972720447 | -0,32 | 0,456156525 | 0,15  | 0,816081776 | 0,27  | 0,480121746 | 0,15  | 0,846526184 |
| lsca1   | 0,06  | 0,9230183   | 0,06  | 0,91919527  | 0,15  | 0,85092959  | -0,23 | 0,637350063 | -0,31 | 0,645198541 |
| lsca2   | 0,12  | 0,84241758  | 0,16  | 0,897645724 | 0,03  | 0,984879454 | -0,46 | 0,310873282 | -0,08 | 0,926352269 |
| lscu    | 0,06  | 0,928499167 | -0,07 | 0,931676012 | 0,13  | 0,838289412 | -0,34 | 0,385078342 | -0,2  | 0,739851808 |
| lsg15   | 1,28  | 0,074890017 | 1,02  | 0,173488446 | -1,08 | 0,049000612 | -0,47 | 0,226575643 | 0,75  | 0,276728769 |
| lsg20   | 0,42  | 0,247531815 | 0,12  | 0,855702031 | -0,14 | 0,897383719 | -0,78 | 0,04687876  | 1,11  | 0,041051566 |

|         |       |             |       |             |       |             |       |             |       |             |
|---------|-------|-------------|-------|-------------|-------|-------------|-------|-------------|-------|-------------|
| lsg20l2 | -0,33 | 0,479545376 | 0,12  | 0,893656409 | 0,25  | 0,864598204 | 0,01  | 0,992906132 | 0,08  | 0,928775639 |
| lsl1    | 0,18  | 0,732747802 | 0,24  | 0,615058004 | -0,03 | 0,971668287 | -0,18 | 0,745447711 | -0,08 | 0,928724353 |
| lsl2    | -0,18 | 0,846447446 | 0,32  | 0,595346193 | -0,35 | 0,640703366 | -0,35 | 0,480121746 | 0,08  | 0,960974478 |
| lslr    | 0,09  | 0,883923631 | 0,22  | 0,709432782 | 0,04  | 0,977827235 | -0,36 | 0,721334191 | -0,54 | 0,652073004 |
| lslr2   | 0,81  | 0,279375048 | 0,7   | 0,300718094 | -0,11 | 0,904057901 | -1,89 | 0,038227695 | -0,11 | 0,902802615 |
| lsm1    | 0,76  | 0,187868882 | 0,5   | 0,408512216 | -0,29 | 0,754138555 | -0,12 | 0,897792452 | 0,06  | 0,952296554 |
| lsm2    | -0,17 | 0,761457464 | 0,03  | 0,969111656 | 0,23  | 0,729730145 | -0,37 | 0,428767536 | -0,37 | 0,571626211 |
| lsoc1   | -0,58 | 0,175572914 | -0,32 | 0,664787536 | 0,23  | 0,866141679 | 0,11  | 0,842011593 | 0     | 0,996625245 |
| lsoc2a  | 0,66  | 0,15490509  | 0,06  | 0,975427696 | 0,25  | 0,794296938 | -0,06 | 0,967866794 | 0,3   | 0,820978635 |
| lsoc2b  | 0,33  | 0,764824121 | 0,25  | 0,664765388 | -0,23 | 0,686625108 | -0,81 | 0,101239783 | -0,84 | 0,292058998 |
| lspd    | -0,12 | 0,843765874 | -0,2  | 0,781665479 | -0,19 | 0,74860644  | 0,75  | 0,175575377 | 0,66  | 0,324146563 |
| lst1    | 0,26  | 0,495523712 | 0,05  | 0,927367017 | 0,1   | 0,896467636 | 0     | 0,998658463 | -0,15 | 0,801385411 |
| lsx     | 0,39  | 0,525107972 | 0,16  | 0,911359067 | 0,43  | 0,457506381 | 0,07  | 0,955666315 | 0,12  | 0,869428633 |
| lsy1    | -0,11 | 0,898269435 | -0,16 | 0,823859284 | -0,11 | 0,899171797 | 0,45  | 0,626791624 | 0,37  | 0,731527639 |
| lsyna1  | -0,41 | 0,493149055 | -0,05 | 0,934602811 | 0,44  | 0,549895527 | -1,56 | 0,022090326 | -0,14 | 0,922921816 |
| ltch    | -0,31 | 0,738714467 | -0,28 | 0,816354863 | -0,6  | 0,661747229 | 0,09  | 0,87613802  | -0,36 | 0,468672987 |
| ltfg1   | 0,27  | 0,522076759 | 0,01  | 0,9951682   | 0,49  | 0,527929204 | 0,14  | 0,869148815 | -0,21 | 0,848679763 |
| ltfg2   | -0,24 | 0,829299665 | -0,16 | 0,822018836 | -0,33 | 0,730738549 | 0,1   | 0,892186579 | -0,02 | 0,987948597 |
| ltga1   | 0,86  | 0,187534389 | 0,79  | 0,100303734 | -1,71 | 0,023071727 | 0,6   | 0,085667718 | 1,22  | 0,015349051 |
| ltga10  | 0,4   | 0,738714467 | 0,36  | 0,56950098  | 0,32  | 0,853753298 | 0,12  | 0,959359303 | 0,62  | 0,735796038 |
| ltga11  | -0,14 | 0,805438081 | -0,13 | 0,882847123 | 0     | 0,999329448 | 0,32  | 0,610149813 | 0,12  | 0,916981889 |
| ltga2   | -0,38 | 0,54180732  | -0,65 | 0,172014551 | 0,65  | 0,273645359 | 2,44  | 0,019790457 | -0,94 | 0,212051906 |
| ltga2b  | 0,26  | 0,561977827 | -0,01 | 0,99804971  | 0,71  | 0,249821562 | 0,84  | 0,032346574 | 0,36  | 0,450543672 |
| ltga3   | 0,05  | 0,949437499 | 0,25  | 0,488489865 | -0,18 | 0,77448246  | 0,08  | 0,856329272 | -0,21 | 0,750359224 |
| ltga4   | -0,37 | 0,79059266  | 0,23  | 0,532411047 | -0,43 | 0,647047222 | -1,06 | 0,018146068 | 0,19  | 0,875713596 |
| ltga5   | -0,19 | 0,654661272 | -0,42 | 0,363748564 | 0,61  | 0,184164925 | 1,38  | 0,019720005 | -0,34 | 0,515556164 |
| ltga6   | -0,32 | 0,46877337  | 0,08  | 0,887578509 | 0,02  | 0,99147958  | 1,56  | 0,083974472 | -0,01 | 0,992022739 |
| ltga7   | -0,02 | 0,983516046 | 0,17  | 0,86410431  | 0     | 0,997581017 | -0,72 | 0,212687534 | -0,4  | 0,681597394 |
| ltga8   | -0,18 | 0,763657448 | -0,07 | 0,937424389 | 0,53  | 0,414543305 | -1,46 | 0,035160994 | -1,27 | 0,074022462 |
| ltga9   | -0,7  | 0,264165327 | 0,24  | 0,761404909 | 0,17  | 0,883178213 | -0,73 | 0,335213853 | -0,43 | 0,601753447 |
| ltgad   | 0,49  | 0,682852792 | -0,29 | 0,703923817 | -0,18 | 0,817106175 | 0,04  | 0,958223234 | -0,1  | 0,932742551 |
| ltgae   | -0,06 | 0,944652244 | -0,44 | 0,519915586 | 0,05  | 0,971668287 | 0,59  | 0,295360318 | -0,04 | 0,973006486 |
| ltgal   | 0,26  | 0,829299665 | -0,14 | 0,868234125 | -0,7  | 0,37541846  | -0,41 | 0,439173785 | -0,36 | 0,682134021 |
| ltgam   | 0,64  | 0,455104692 | 0,07  | 0,962138182 | 0,56  | 0,787621984 | 0,22  | 0,748929665 | -0,15 | 0,820575905 |
| ltgav   | 0,37  | 0,46691413  | -0,03 | 0,975639191 | 0,39  | 0,488112233 | 2,35  | 0,024534714 | -0,09 | 0,952718905 |

|           |       |             |       |             |       |             |       |             |       |             |
|-----------|-------|-------------|-------|-------------|-------|-------------|-------|-------------|-------|-------------|
| ltgax     | -0,01 | 0,98377519  | -0,06 | 0,900801202 | 0,54  | 0,29239254  | -0,48 | 0,126608574 | -0,66 | 0,268916528 |
| ltgb1     | -0,04 | 0,962660554 | 0,13  | 0,855632384 | -0,02 | 0,988661889 | 0,8   | 0,163828865 | -0,06 | 0,960974478 |
| ltgb1bp1  | 0,4   | 0,627641756 | 0,34  | 0,457889449 | -0,09 | 0,956445791 | 0,14  | 0,814810741 | 0,71  | 0,348831911 |
| ltgb1bp2  | 0,08  | 0,918524426 | -0,6  | 0,609476305 | -0,18 | 0,839921239 | 0,8   | 0,207857778 | 0,28  | 0,735152891 |
| ltgb2     | 0,03  | 0,971586153 | -0,34 | 0,702406882 | -0,63 | 0,352312788 | -1,06 | 0,062738721 | -0,27 | 0,848977077 |
| ltgb2l    | 0,04  | 0,965116762 | 0,27  | 0,861905894 | 0,48  | 0,471873683 | -0,11 | 0,885417869 | 0,28  | 0,740020498 |
| ltgb3     | 0,03  | 0,964951393 | 0,43  | 0,551072171 | -0,07 | 0,963018377 | 1,44  | 0,035685356 | -0,39 | 0,512319047 |
| ltgb3bp   | -0,71 | 0,400171261 | -0,75 | 0,664787536 | 1,93  | 0,068894819 | -0,74 | 0,278825037 | -0,68 | 0,640333106 |
| ltgb4     | -0,21 | 0,773078788 | -0,34 | 0,570852598 | 0,1   | 0,922318683 | -0,76 | 0,081030036 | -0,13 | 0,855281866 |
| ltgb5     | -0,49 | 0,596550801 | -0,8  | 0,331833683 | 1,53  | 0,046579559 | -2,64 | 0,007738248 | -1,48 | 0,024319976 |
| ltgb6     | 0,42  | 0,620681779 | 0,31  | 0,610458076 | 0,89  | 0,197507065 | -0,71 | 0,096539409 | -0,69 | 0,199163495 |
| ltgb7     | 0,28  | 0,703234088 | 0,9   | 0,137833549 | 0,27  | 0,823396412 | -0,48 | 0,339924361 | 0,98  | 0,111401215 |
| ltgb8     | -0,03 | 0,973545171 | 0,18  | 0,772977288 | -0,14 | 0,848462153 | -0,79 | 0,22250576  | -0,01 | 0,99627266  |
| ltgbl1    | -0,01 | 0,993728727 | -0,25 | 0,641804702 | 0,01  | 0,99407001  | 0,23  | 0,795439286 | 0,31  | 0,800540569 |
| ltih1     | -0,09 | 0,854532238 | 0,17  | 0,804899717 | -0,24 | 0,736630059 | -0,12 | 0,776452453 | 0,08  | 0,931519966 |
| ltih2     | -0,25 | 0,792820274 | -0,05 | 0,938233008 | -0,38 | 0,658838451 | -0,16 | 0,847879212 | -0,07 | 0,957993472 |
| ltih3     | 0,43  | 0,632862768 | -0,23 | 0,842793123 | -0,39 | 0,628978443 | -0,17 | 0,839256491 | -0,76 | 0,587199571 |
| ltih4     | -0,23 | 0,712165686 | 0,1   | 0,862425749 | 0,06  | 0,935661195 | -0,36 | 0,80049982  | -0,21 | 0,909363599 |
| ltih5     | -1,35 | 0,285063072 | -1,13 | 0,214321569 | 0,6   | 0,374422909 | 0,71  | 0,477284723 | -0,34 | 0,824725869 |
| ltih5l-ps | -0,27 | 0,474382977 | 0,35  | 0,352137531 | 0,2   | 0,715403033 | -0,02 | 0,973433443 | 0,09  | 0,892505022 |
| ltk       | -0,36 | 0,64776317  | -0,46 | 0,577539302 | -0,51 | 0,321491098 | 0,45  | 0,283974903 | 0,7   | 0,414275553 |
| ltln1     | 0,07  | 0,943538971 | 0,51  | 0,323278688 | -0,34 | 0,583151958 | -0,17 | 0,619134782 | 0,09  | 0,923816228 |
| ltm2a     | -0,21 | 0,72989626  | -0,07 | 0,951768918 | 0,18  | 0,866568888 | -1,03 | 0,249683469 | -0,31 | 0,827150612 |
| ltm2b     | 0,34  | 0,358601142 | 0,28  | 0,459417799 | -0,41 | 0,339524129 | -0,05 | 0,899335603 | 0,15  | 0,793952361 |
| ltm2c     | -0,17 | 0,662416763 | 0,05  | 0,932628106 | -0,29 | 0,598179126 | 0,89  | 0,045809254 | -0,45 | 0,442579293 |
| ltpa      | -0,65 | 0,421071368 | -0,43 | 0,400943207 | 0,37  | 0,632280762 | 0,73  | 0,065769023 | -0,14 | 0,848977077 |
| ltpk1     | 0,35  | 0,573267041 | 1,18  | 0,078313776 | -0,52 | 0,507425636 | -0,21 | 0,611768874 | 0,01  | 0,991977803 |
| ltpka     | 0,57  | 0,329339382 | 0,6   | 0,528002191 | -0,21 | 0,693655482 | -0,07 | 0,908141892 | 0,6   | 0,243848105 |
| ltpkb     | -0,26 | 0,556128848 | 0,23  | 0,530207532 | 0,08  | 0,949489888 | -0,49 | 0,221489981 | -0,37 | 0,535065209 |
| ltpkc     | 0,57  | 0,279386788 | 0,68  | 0,214682893 | 0,01  | 0,990836784 | 1,55  | 0,074454367 | 0,39  | 0,701728076 |
| ltp1      | 0,25  | 0,559413848 | 0,27  | 0,629493333 | -0,36 | 0,606705146 | -0,39 | 0,302214149 | 0,14  | 0,827032122 |
| ltp2      | -0,24 | 0,680520303 | 0,01  | 0,995205602 | -0,11 | 0,90524121  | -0,87 | 0,060237521 | -0,39 | 0,442040974 |
| ltp3      | -0,39 | 0,387558354 | -0,19 | 0,753679288 | 0,32  | 0,523960429 | -0,98 | 0,077565667 | -0,68 | 0,275599194 |
| ltp3os    | 0,07  | 0,903817676 | -0,27 | 0,750378621 | -0,29 | 0,689739898 | 0     | 1           | -0,04 | 0,960000999 |
| ltprip    | 0,17  | 0,777385926 | 0,17  | 0,726204935 | -0,33 | 0,705915392 | -1,61 | 0,025699992 | -0,49 | 0,434320524 |

|          |       |             |       |             |       |             |       |             |       |             |
|----------|-------|-------------|-------|-------------|-------|-------------|-------|-------------|-------|-------------|
| ltpripl1 | -0,05 | 0,926692467 | 0,01  | 0,996113371 | -0,37 | 0,530591164 | 0,01  | 0,993629132 | -0,32 | 0,694779162 |
| ltpripl2 | 0,24  | 0,495989814 | -0,13 | 0,746998924 | 0,72  | 0,158695441 | 0,52  | 0,138814476 | -0,31 | 0,542367521 |
| ltsn1    | -0,62 | 0,272587269 | -0,72 | 0,210141501 | 0,29  | 0,631855861 | 0,74  | 0,220379296 | -0,03 | 0,979456872 |
| ltsn2    | 0,03  | 0,95837965  | 0,12  | 0,781665479 | -0,13 | 0,894339966 | 0,35  | 0,306085306 | 0,03  | 0,977599806 |
| lvd      | -0,24 | 0,764288636 | -0,37 | 0,515826726 | 0,33  | 0,760679785 | 0,28  | 0,714687942 | -0,32 | 0,738377502 |
| lvl      | 0,09  | 0,837433306 | 0,04  | 0,940897177 | 0,15  | 0,846176253 | 0,06  | 0,90409407  | 0,15  | 0,849001489 |
| lvns1abp | -0,12 | 0,872329453 | -0,19 | 0,741960755 | -0,1  | 0,928606229 | -0,29 | 0,414522125 | -0,81 | 0,208771188 |
| lws1     | -0,2  | 0,72696312  | 0,12  | 0,857408462 | 0,27  | 0,721639169 | 0,4   | 0,524462414 | 0,34  | 0,638942726 |
| lyd      | 0,22  | 0,794588318 | -0,34 | 0,589944528 | -0,1  | 0,9113279   | -0,08 | 0,860740562 | 0,38  | 0,699060093 |
| lzumo1   | 0,11  | 0,902861556 | -0,41 | 0,815791007 | -0,45 | 0,297320523 | -0,26 | 0,769161235 | -0,21 | 0,844265172 |
| lzumo1r  | 0,31  | 0,494679097 | 0,14  | 0,807100558 | -0,14 | 0,868609956 | 0,06  | 0,903419802 | -0,57 | 0,324281141 |
| lzumo2   | 0,22  | 0,673291416 | 0,2   | 0,86297915  | -0,28 | 0,725191296 | 0,05  | 0,955464588 | -0,27 | 0,731865047 |
| lzumo3   | 0     | 0,998027251 | 0,12  | 0,896611442 | -0,07 | 0,932577939 | 0,06  | 0,91388554  | 0,16  | 0,861778926 |
| lzumo4   | 0,05  | 0,950669622 | -0,66 | 0,620187279 | 0,24  | 0,753193013 | -0,49 | 0,538229097 | -0,34 | 0,578675445 |
| Jade1    | -0,65 | 0,328682034 | -0,31 | 0,842885677 | -0,31 | 0,763668718 | -0,7  | 0,534087558 | -0,32 | 0,832587898 |
| Jade2    | -0,54 | 0,20299588  | 0     | 0,998164412 | -0,31 | 0,698662367 | -1,99 | 0,006141724 | -0,54 | 0,31182908  |
| Jade3    | -1,55 | 0,189684245 | -0,75 | 0,49125334  | 0,93  | 0,25941375  | 1,65  | 0,204199653 | 0,61  | 0,686645773 |
| Jag1     | -0,6  | 0,317205194 | -0,79 | 0,406521749 | 0,94  | 0,124647743 | -1,31 | 0,063285142 | -1,1  | 0,040259622 |
| Jag2     | -0,9  | 0,126768659 | -0,19 | 0,829923566 | 0,27  | 0,756257368 | -0,91 | 0,048295711 | 0,07  | 0,927536545 |
| Jagn1    | -0,48 | 0,425285092 | -0,13 | 0,896136132 | -0,18 | 0,861307315 | 0,49  | 0,411913475 | -0,56 | 0,399112361 |
| Jak1     | 0,06  | 0,922118639 | 0,21  | 0,700297886 | 0,19  | 0,804576742 | 0,43  | 0,265676944 | 0,48  | 0,299354036 |
| Jak2     | 1,03  | 0,074890017 | 0,62  | 0,151801598 | -0,62 | 0,440550754 | 2,01  | 0,006194852 | 1,56  | 0,010449134 |
| Jak3     | -0,25 | 0,565823399 | -0,07 | 0,884052331 | 0,21  | 0,79541037  | -0,58 | 0,119211211 | -0,24 | 0,684349871 |
| Jakmip1  | -0,03 | 0,979225105 | -0,04 | 0,994137877 | -0,27 | 0,854432422 | 0,11  | 0,919062567 | 0,54  | 0,534432231 |
| Jakmip2  | -0,78 | 0,195673325 | -0,18 | 0,842953835 | -0,3  | 0,6431021   | 0,8   | 0,091541776 | 0,54  | 0,379083779 |
| Jakmip3  | 0,59  | 0,178589155 | -0,16 | 0,809003394 | -0,17 | 0,873026373 | 0,02  | 0,970065845 | -0,27 | 0,68987325  |
| Jam2     | 0,6   | 0,278797445 | 0,52  | 0,341083995 | -1,28 | 0,008694097 | -1    | 0,031624209 | 0,56  | 0,317819733 |
| Jam3     | -0,3  | 0,815219917 | -0,17 | 0,943915456 | 0,22  | 0,792016423 | -1,69 | 0,027443269 | 0,36  | 0,629938775 |
| Jarid2   | 0,07  | 0,91917614  | 0,22  | 0,73274163  | 0,31  | 0,628978443 | -0,19 | 0,699027667 | -0,44 | 0,415173306 |
| Jazf1    | -0,26 | 0,599777714 | 0,04  | 0,958545812 | 0,14  | 0,922318683 | 0,5   | 0,247548798 | -0,59 | 0,278096307 |
| Jchain   | 0,07  | 0,925510521 | 0,53  | 0,661734303 | -0,25 | 0,708876309 | 0,67  | 0,127273361 | 0,33  | 0,592505698 |
| Jdp2     | 0,11  | 0,869565514 | 0,37  | 0,473838777 | -0,32 | 0,703647945 | -1,83 | 0,007677736 | -0,28 | 0,591696449 |
| Jhy      | 0,02  | 0,976314749 | 0,12  | 0,940269529 | 0,02  | 0,991240121 | -0,03 | 0,982450636 | 0,34  | 0,712793529 |
| Jkamp    | -0,02 | 0,972701787 | -0,17 | 0,754913608 | 0,94  | 0,279980018 | -0,54 | 0,253553387 | -0,84 | 0,1502613   |
| Jmjd1c   | 0,38  | 0,496008309 | 0,23  | 0,716668427 | -0,1  | 0,863833849 | -0,24 | 0,72503205  | 0,1   | 0,922151079 |

|               |       |             |       |             |       |             |       |             |       |             |
|---------------|-------|-------------|-------|-------------|-------|-------------|-------|-------------|-------|-------------|
| Jmjd4         | -0,29 | 0,729638783 | 0,14  | 0,860602717 | 0,46  | 0,56948206  | -0,1  | 0,873093341 | 0,13  | 0,877913474 |
| Jmjd6         | 0,1   | 0,886741208 | 0,07  | 0,932292974 | 0,01  | 0,993686224 | 0,39  | 0,345221746 | 0,19  | 0,751268314 |
| Jmjd8         | -0,11 | 0,854434462 | -0,06 | 0,934602811 | 0,15  | 0,817818413 | -0,62 | 0,145699231 | -0,87 | 0,132370772 |
| Jmy           | -0,97 | 0,41815235  | 0,17  | 0,91472637  | -0,36 | 0,490720691 | -0,18 | 0,923587701 | 0,64  | 0,643209234 |
| Josd1         | -0,2  | 0,860711785 | -0,23 | 0,810875398 | 0,79  | 0,647006895 | 0,54  | 0,668342089 | 0,13  | 0,950267521 |
| Josd2         | -0,1  | 0,926962211 | 0,17  | 0,828219939 | -0,03 | 0,978012085 | -0,47 | 0,658011013 | -0,38 | 0,716229308 |
| Jph1          | -0,08 | 0,932982682 | -0,64 | 0,194990095 | 0,62  | 0,446493846 | 0,15  | 0,86329094  | -0,34 | 0,806478588 |
| Jph2          | -0,07 | 0,893137556 | 0,25  | 0,643895096 | 0,15  | 0,909233941 | -0,33 | 0,585862171 | 0,5   | 0,479560208 |
| Jph3          | 0,18  | 0,870367016 | -0,3  | 0,642064836 | -0,03 | 0,976752996 | 0,04  | 0,982212444 | 0,21  | 0,829437698 |
| Jph4          | 0,16  | 0,76962343  | -0,2  | 0,638433402 | -0,16 | 0,80210446  | 0     | 1           | 0,19  | 0,791840213 |
| Jpx           | -0,04 | 0,96153339  | -0,07 | 0,905517116 | -0,09 | 0,912968686 | 0,16  | 0,776797043 | 0,11  | 0,882032329 |
| Jrk           | -0,16 | 0,742823915 | -0,11 | 0,933633716 | 0,52  | 0,471841455 | -1,38 | 0,127606383 | 0,15  | 0,875614779 |
| Jrkl          | 0,23  | 0,74140155  | -0,12 | 0,972488776 | 0,44  | 0,595253534 | -0,35 | 0,849632852 | 0,83  | 0,583894721 |
| Jsrp1         | -0,38 | 0,364107408 | -0,08 | 0,907167997 | 0,02  | 0,985326269 | 0,02  | 0,972244785 | -0,12 | 0,864049783 |
| Jtb           | -0,11 | 0,862322913 | -0,36 | 0,612941322 | 0,18  | 0,85833551  | 0,2   | 0,608147108 | 0,33  | 0,597080822 |
| Jun           | 0,19  | 0,610309983 | 0,54  | 0,25477411  | -0,46 | 0,343594254 | -0,82 | 0,048096343 | 0,02  | 0,983469081 |
| Junb          | -0,2  | 0,592745257 | 0,34  | 0,405702807 | -0,18 | 0,752757867 | -0,56 | 0,089104229 | -0,02 | 0,983469081 |
| Jund          | -0,95 | 0,102058516 | 0,16  | 0,798757125 | 0,02  | 0,989625842 | 0,1   | 0,868680052 | 0,23  | 0,78532501  |
| Jup           | -1,15 | 0,020026413 | -0,84 | 0,2014299   | 0,7   | 0,124700416 | -0,88 | 0,34818225  | -1,04 | 0,246245872 |
| K230010J24Rik | 0,14  | 0,832696131 | -0,16 | 0,708353088 | 0,43  | 0,460875038 | -0,2  | 0,686014055 | -0,13 | 0,885872093 |
| Kalrn         | -0,38 | 0,475761281 | -0,34 | 0,483998954 | 0,26  | 0,744387748 | -1,24 | 0,026255548 | -0,37 | 0,571251989 |
| Kank1         | -0,67 | 0,580909375 | 0,12  | 0,935041212 | 0,62  | 0,536712236 | -0,3  | 0,902926359 | 0,17  | 0,95587699  |
| Kank2         | -0,27 | 0,71858103  | -0,21 | 0,66616142  | 0,53  | 0,25755054  | -0,48 | 0,139727753 | -0,38 | 0,511300791 |
| Kank3         | 0,1   | 0,89081819  | 0,15  | 0,84536438  | -0,6  | 0,316219499 | -1,09 | 0,036226618 | -0,24 | 0,697757911 |
| Kank4         | 0,02  | 0,975506993 | 0,23  | 0,782652703 | 0,12  | 0,873980509 | -2,2  | 0,01323279  | -0,29 | 0,823098095 |
| Kank4os       | 0,19  | 0,790694396 | -0,01 | 0,990052916 | -0,41 | 0,437087993 | -0,1  | 0,804420502 | -0,11 | 0,891925115 |
| Kansl1        | -0,08 | 0,919110324 | -0,14 | 0,73623784  | -0,01 | 0,993280531 | -0,23 | 0,780509374 | -0,24 | 0,810276195 |
| Kansl11       | -0,02 | 0,979827119 | 0,66  | 0,596930496 | -0,45 | 0,514610288 | -0,66 | 0,353023346 | 0,19  | 0,864657678 |
| Kansl2        | 0,08  | 0,891798972 | -0,01 | 0,997935558 | -0,12 | 0,909963525 | 1,1   | 0,037448594 | 0,5   | 0,285422876 |
| Kansl3        | 0,08  | 0,921306075 | 0,29  | 0,729172466 | 0,27  | 0,750826735 | -0,63 | 0,185251174 | -0,07 | 0,930824723 |
| Kantr         | -0,44 | 0,664456582 | 0,21  | 0,745130453 | 0,37  | 0,721952929 | -1,29 | 0,088533265 | -1,02 | 0,076574892 |
| Kap           | 0,07  | 0,882500171 | -0,21 | 0,627893736 | -0,13 | 0,932114764 | -1,15 | 0,095324781 | -0,49 | 0,621839448 |
| Kars          | 0,17  | 0,743235829 | 0,18  | 0,696566507 | -0,6  | 0,210837457 | 0,71  | 0,070383276 | 0,72  | 0,117679228 |
| Kat2a         | -0,43 | 0,319727327 | -0,45 | 0,423023468 | 0,2   | 0,772782651 | 0,91  | 0,081774576 | 0,22  | 0,759432231 |
| Kat2b         | 0,64  | 0,269026142 | 0,39  | 0,583200444 | -0,85 | 0,09059546  | -0,02 | 0,976744624 | 0,85  | 0,055628724 |

|         |       |             |       |             |       |             |       |             |       |             |
|---------|-------|-------------|-------|-------------|-------|-------------|-------|-------------|-------|-------------|
| Kat5    | 0,01  | 0,995482647 | -0,09 | 0,860629851 | 0,09  | 0,909963525 | -0,24 | 0,446566698 | -0,16 | 0,776907684 |
| Kat6a   | 0,22  | 0,751568489 | 0,06  | 0,923044405 | -0,16 | 0,759124285 | -0,03 | 0,975819972 | 0,52  | 0,452376077 |
| Kat6b   | 0,25  | 0,70257166  | 0,21  | 0,580257061 | -0,07 | 0,940489823 | 0,55  | 0,212925448 | -0,46 | 0,623214829 |
| Kat7    | -0,18 | 0,79544188  | 0,17  | 0,842793123 | 0,83  | 0,184164925 | -0,03 | 0,956559127 | -0,06 | 0,939448119 |
| Kat8    | 0,13  | 0,883923631 | 0,13  | 0,877602011 | 0,42  | 0,515265841 | -0,34 | 0,643150861 | 0,01  | 0,992406971 |
| Katna1  | 1     | 0,221302977 | 0,84  | 0,092119254 | -0,5  | 0,647047222 | -0,16 | 0,848000162 | 0,88  | 0,185914462 |
| Katnal1 | -0,91 | 0,237402272 | -0,02 | 0,982786635 | 0,67  | 0,124912754 | 0,01  | 0,999221046 | -0,18 | 0,92519473  |
| Katnal2 | -0,02 | 0,983563899 | -0,19 | 0,774278866 | 0,06  | 0,934354994 | 0,18  | 0,640127733 | 0,02  | 0,980961333 |
| Katnb1  | -0,26 | 0,637908504 | 0,07  | 0,916447057 | 0,31  | 0,491041757 | 0,39  | 0,300803292 | -0,37 | 0,455836363 |
| Katnbl1 | 0,15  | 0,887418594 | -0,28 | 0,786074087 | 0,45  | 0,507058256 | 0,77  | 0,255806139 | -0,03 | 0,982813638 |
| Kazald1 | -0,02 | 0,981412917 | 0,14  | 0,821170447 | -0,16 | 0,881463812 | -0,84 | 0,177569419 | -0,17 | 0,874829878 |
| Kazn    | 0,19  | 0,803492493 | 0,28  | 0,619807116 | -0,24 | 0,722394878 | -0,13 | 0,843854908 | -0,07 | 0,9464417   |
| Kbtbd11 | 0,33  | 0,460231397 | 0,23  | 0,679092904 | -0,37 | 0,432930524 | -1,38 | 0,033480522 | 0,13  | 0,849560772 |
| Kbtbd12 | -0,09 | 0,926316023 | -0,09 | 0,925489113 | -0,27 | 0,763017166 | -0,23 | 0,872512015 | 0,53  | 0,68044046  |
| Kbtbd13 | 0,02  | 0,979827119 | 0     | 1           | -0,17 | 0,721952929 | -0,12 | 0,809582566 | -0,33 | 0,540202674 |
| Kbtbd2  | -0,65 | 0,318041432 | -0,01 | 0,9860901   | 0,22  | 0,738804472 | 0,16  | 0,760641895 | -0,12 | 0,88282824  |
| Kbtbd3  | -0,09 | 0,944309453 | 0,02  | 0,989260323 | 0     | 0,999002132 | -0,04 | 0,957573971 | -0,02 | 0,990091016 |
| Kbtbd4  | -0,29 | 0,799541413 | -0,21 | 0,827228251 | 1,11  | 0,337509636 | -0,77 | 0,332822631 | -0,77 | 0,299348253 |
| Kbtbd6  | -0,23 | 0,771381752 | -0,55 | 0,277253387 | 0,11  | 0,908400411 | 0,94  | 0,161137645 | 0,12  | 0,861056054 |
| Kbtbd7  | -0,24 | 0,815219917 | 0,54  | 0,493580894 | 0,22  | 0,807867209 | -0,62 | 0,618453093 | 0,49  | 0,726246366 |
| Kbtbd8  | 0     | 0,997285684 | -0,04 | 0,979551751 | 0,17  | 0,824343294 | 0,28  | 0,808183592 | -0,26 | 0,848743212 |
| Kcmf1   | 0,09  | 0,841685426 | -0,05 | 0,926157704 | -0,17 | 0,818563735 | 0,3   | 0,405337222 | 0,22  | 0,696732699 |
| Kcna1   | 0,11  | 0,824010969 | -0,14 | 0,858860016 | -0,06 | 0,92787918  | 0,15  | 0,804185549 | 0,22  | 0,702402249 |
| Kcna10  | 0,22  | 0,757239936 | 0,19  | 0,732847182 | 0,03  | 0,967930981 | 0,11  | 0,814830396 | -0,01 | 0,994988084 |
| Kcna2   | 0,1   | 0,898572877 | -0,25 | 0,72274107  | -0,02 | 0,991417967 | -0,03 | 0,977322993 | -0,4  | 0,597080822 |
| Kcna3   | -0,2  | 0,673291416 | -0,29 | 0,664787536 | -0,21 | 0,742758388 | 0,46  | 0,614617075 | -0,05 | 0,97757951  |
| Kcna4   | -0,34 | 0,618093813 | 0,5   | 0,688450928 | -0,1  | 0,902672106 | -0,52 | 0,666001651 | -0,2  | 0,878966527 |
| Kcna5   | -0,6  | 0,352130026 | -0,54 | 0,280779553 | -0,38 | 0,746677927 | 2,27  | 0,003907268 | -0,78 | 0,277185147 |
| Kcna6   | -0,82 | 0,277692472 | -0,28 | 0,679092904 | 0,69  | 0,387489243 | 0,25  | 0,734315351 | -0,37 | 0,758052028 |
| Kcna7   | -0,04 | 0,950532575 | 0,05  | 0,926157704 | -0,46 | 0,273645359 | -0,34 | 0,481247914 | -0,11 | 0,921063662 |
| Kcnab1  | 0,37  | 0,759147139 | 0,1   | 0,912137323 | -0,76 | 0,27037497  | -0,81 | 0,422534867 | 0,05  | 0,979456872 |
| Kcnab2  | -0,7  | 0,460231397 | -0,09 | 0,90164068  | 1,26  | 0,26478657  | -1,37 | 0,047498274 | -0,55 | 0,423787085 |
| Kcnab3  | -0,7  | 0,124327015 | -0,63 | 0,533804963 | 0,27  | 0,840187016 | -0,14 | 0,891790388 | -0,64 | 0,442579293 |
| Kcnb1   | 0,26  | 0,768809729 | -0,12 | 0,824372931 | -0,19 | 0,790468311 | -1,84 | 0,01965347  | -0,43 | 0,511962622 |
| Kcnb2   | 0,38  | 0,595422712 | -0,54 | 0,464689086 | -0,12 | 0,863964732 | 0,24  | 0,82242414  | 0,18  | 0,922577223 |



|         |       |             |       |             |       |             |       |             |       |             |
|---------|-------|-------------|-------|-------------|-------|-------------|-------|-------------|-------|-------------|
| Kcnc1   | -0,2  | 0,768443935 | 0,17  | 0,770004485 | 0,11  | 0,910455531 | -0,44 | 0,376988783 | -0,17 | 0,862456985 |
| Kcnc2   | -0,61 | 0,460231397 | -0,27 | 0,882516461 | 0,54  | 0,353588425 | 0,4   | 0,777673386 | -0,75 | 0,329135795 |
| Kcnc3   | -0,17 | 0,757032046 | -0,15 | 0,842663656 | 0,19  | 0,773176492 | 0,21  | 0,592457782 | -0,07 | 0,940092696 |
| Kcnc4   | -0,34 | 0,563164718 | -0,21 | 0,855261337 | -0,12 | 0,861307315 | -0,09 | 0,920036779 | -0,39 | 0,601077802 |
| Kcnd1   | -0,23 | 0,673270664 | 0,14  | 0,823358933 | -0,21 | 0,914134206 | -0,73 | 0,564245683 | -0,51 | 0,750359224 |
| Kcnd2   | 0,23  | 0,758636946 | -0,45 | 0,62733885  | 0,29  | 0,72066129  | 0,4   | 0,567619914 | 0,18  | 0,773718691 |
| Kcnd3   | 0,13  | 0,876600257 | 0,49  | 0,501438027 | -0,36 | 0,559861779 | -0,97 | 0,098383051 | -0,33 | 0,590339443 |
| Kcnd3os | 0,95  | 0,156158686 | 0,23  | 0,639618506 | 0,05  | 0,978561075 | 0,78  | 0,045809254 | 0,15  | 0,876666201 |
| Kcne1   | 0,02  | 0,976574175 | 0,11  | 0,932628106 | -0,18 | 0,792384474 | 0,03  | 0,949310624 | 0,17  | 0,832848337 |
| Kcne11  | -0,05 | 0,949868652 | -0,06 | 0,926210163 | 0,04  | 0,97219762  | 0,44  | 0,235443733 | 0,04  | 0,974805793 |
| Kcne2   | 0,12  | 0,895278749 | -0,01 | 0,994802028 | -0,37 | 0,615591382 | -0,25 | 0,442387288 | -0,15 | 0,823586467 |
| Kcne3   | -1,3  | 0,156998083 | -1,54 | 0,062302861 | 2,59  | 0,00623332  | 1,66  | 0,025986291 | -1,59 | 0,155847858 |
| Kcne4   | 0,03  | 0,970286316 | 0,25  | 0,767178812 | 0,33  | 0,664130139 | -0,45 | 0,384391033 | -0,24 | 0,676132909 |
| Kcnf1   | 0,47  | 0,568136316 | -0,19 | 0,721114342 | 0,16  | 0,914522109 | -0,23 | 0,593103523 | -0,23 | 0,720742956 |
| Kcng1   | 0,11  | 0,832696131 | 0,08  | 0,928267096 | -0,31 | 0,559617374 | -0,22 | 0,550334432 | 0,09  | 0,934185668 |
| Kcng2   | -0,07 | 0,877849931 | 0,21  | 0,641804702 | -0,1  | 0,921956183 | 0,22  | 0,605823496 | -0,13 | 0,89104084  |
| Kcng3   | -0,03 | 0,966775766 | 0,06  | 0,958314419 | 0,08  | 0,938771378 | 0,02  | 0,980875042 | 0,24  | 0,684349871 |
| Kcng4   | -0,2  | 0,64776317  | -0,13 | 0,790939978 | 0,07  | 0,944441051 | 0     | 1           | -0,37 | 0,549785483 |
| Kcnh1   | 0,84  | 0,207447879 | 0,29  | 0,824916914 | -0,58 | 0,440550754 | 1,59  | 0,059597561 | -0,14 | 0,948163009 |
| Kcnh2   | -0,15 | 0,803557792 | 0,34  | 0,551515746 | 0,58  | 0,471653047 | -0,04 | 0,967866794 | -0,32 | 0,738377502 |
| Kcnh3   | -0,37 | 0,49222847  | -0,14 | 0,786394409 | 0,01  | 0,993379272 | 0,21  | 0,675340376 | -0,22 | 0,754404947 |
| Kcnh4   | -0,26 | 0,561405935 | 0,08  | 0,953355735 | -0,19 | 0,819410193 | -0,49 | 0,274415093 | -0,76 | 0,171797471 |
| Kcnh5   | 0,22  | 0,718901325 | 0,71  | 0,441593532 | 0,13  | 0,881461218 | -0,23 | 0,67892809  | -0,24 | 0,697757911 |
| Kcnh6   | -0,65 | 0,251832189 | 0,46  | 0,758387553 | -0,22 | 0,772397144 | 0,14  | 0,810891431 | 0,22  | 0,763240477 |
| Kcnh7   | -0,31 | 0,480319644 | 0,19  | 0,81745681  | 0,11  | 0,911894304 | -0,36 | 0,556996699 | -0,31 | 0,675519772 |
| Kcnh8   | -0,29 | 0,692923321 | 0,16  | 0,882847123 | -0,37 | 0,446135567 | 0,26  | 0,825247725 | 0,34  | 0,765809384 |
| Kcnip1  | -0,15 | 0,764288636 | 0,34  | 0,495742596 | 0,11  | 0,914134206 | -0,01 | 0,990868391 | 0,08  | 0,949545998 |
| Kcnip2  | 0,12  | 0,875464288 | 0,42  | 0,681698887 | 0,08  | 0,955303601 | -0,13 | 0,908535783 | 0,13  | 0,949244147 |
| Kcnip3  | -0,44 | 0,676906193 | -0,19 | 0,867265251 | 0,13  | 0,899913569 | 0,21  | 0,827026984 | 0,19  | 0,850611225 |
| Kcnip4  | 0,12  | 0,914180919 | -0,54 | 0,598211927 | -0,2  | 0,811944479 | 0,54  | 0,176147605 | 0,17  | 0,84701421  |
| Kcnj1   | -0,4  | 0,448406902 | 0,19  | 0,714081487 | -0,39 | 0,446809981 | -1,38 | 0,162878391 | 0,16  | 0,829996445 |
| Kcnj10  | 0,28  | 0,735860437 | 0,05  | 0,923174593 | 0,21  | 0,761861872 | 0,23  | 0,66448476  | 0,24  | 0,73108884  |
| Kcnj11  | -0,16 | 0,787408874 | 0,14  | 0,728434379 | 0,5   | 0,241431133 | 0,01  | 0,986287953 | 0,02  | 0,987948597 |
| Kcnj12  | 0,18  | 0,755116147 | 0,5   | 0,566014069 | -0,25 | 0,734556263 | -0,47 | 0,377065598 | 0,03  | 0,974553568 |
| Kcnj13  | 0,06  | 0,952453567 | 0,33  | 0,571026746 | -0,08 | 0,926290634 | 0,08  | 0,916670023 | 0,44  | 0,402769154 |

|           |       |             |       |             |       |             |       |             |       |             |
|-----------|-------|-------------|-------|-------------|-------|-------------|-------|-------------|-------|-------------|
| Kcnj14    | 0,39  | 0,39120208  | -0,01 | 0,994839788 | -0,05 | 0,95204022  | 0,13  | 0,890879327 | 0,29  | 0,738901324 |
| Kcnj15    | 0,38  | 0,597519827 | -0,29 | 0,58591598  | -0,76 | 0,348284918 | 0,74  | 0,075520945 | 0,19  | 0,825680274 |
| Kcnj16    | -0,06 | 0,932671813 | -0,11 | 0,926157704 | -0,2  | 0,777918093 | -0,15 | 0,818318954 | 0,47  | 0,464952461 |
| Kcnj2     | -0,94 | 0,369418071 | -0,47 | 0,468378291 | 0,02  | 0,991568687 | 1,61  | 0,091159146 | -0,39 | 0,653551273 |
| Kcnj3     | 0,03  | 0,959282147 | 0,24  | 0,712500402 | -0,25 | 0,661747229 | 0,03  | 0,966334592 | -0,28 | 0,649339908 |
| Kcnj4     | -0,07 | 0,915528021 | 0,07  | 0,87981455  | -0,25 | 0,809137779 | 0     | 1           | -0,2  | 0,746065878 |
| Kcnj5     | 0,07  | 0,908281692 | 0,06  | 0,936792848 | -0,19 | 0,772397144 | -0,84 | 0,567607684 | 0,22  | 0,909363599 |
| Kcnj6     | -0,05 | 0,941126856 | -0,17 | 0,75380926  | -0,39 | 0,455889638 | -0,14 | 0,862759749 | -0,12 | 0,87645265  |
| Kcnj8     | -1,05 | 0,296573383 | -0,95 | 0,383504117 | 0,93  | 0,323517263 | 2,27  | 0,024096    | -1,18 | 0,106042758 |
| Kcnj9     | 0,2   | 0,819144316 | -0,07 | 0,941811651 | -0,01 | 0,993379272 | 0,1   | 0,800488711 | 0,2   | 0,728530603 |
| Kcnk1     | -0,08 | 0,958188047 | 0,23  | 0,705880084 | -0,54 | 0,574032919 | -0,73 | 0,606227664 | 0,36  | 0,810820885 |
| Kcnk10    | -0,15 | 0,818587047 | 0,65  | 0,437297994 | 0,09  | 0,921817943 | -0,22 | 0,739211197 | 0,03  | 0,977775233 |
| Kcnk12    | -0,33 | 0,675415327 | -0,11 | 0,866200798 | 0,24  | 0,658290431 | -0,01 | 0,988205241 | -0,17 | 0,825697364 |
| Kcnk13    | -0,06 | 0,963177119 | -0,39 | 0,508633526 | -0,23 | 0,757498725 | 0,01  | 0,98922569  | 0,24  | 0,721622418 |
| Kcnk15    | -0,12 | 0,877452704 | 0,43  | 0,530207532 | 0,16  | 0,874935059 | -0,22 | 0,635378562 | 0,05  | 0,968130547 |
| Kcnk16    | -0,17 | 0,777255073 | 0,19  | 0,790939978 | -0,12 | 0,906501943 | 0,21  | 0,778212842 | 0,08  | 0,92519473  |
| Kcnk18    | -0,03 | 0,979300027 | 0,03  | 0,958809366 | -0,51 | 0,264273523 | -0,2  | 0,567185019 | -0,25 | 0,71265105  |
| Kcnk2     | 0,29  | 0,67806773  | -0,63 | 0,222998638 | -0,24 | 0,709314442 | 0,35  | 0,64997222  | 0,27  | 0,823098095 |
| Kcnk3     | -0,15 | 0,758136438 | -0,02 | 0,991113408 | -0,16 | 0,834069966 | -0,5  | 0,320957723 | -0,48 | 0,583631554 |
| Kcnk4     | 0,01  | 0,993175772 | -0,11 | 0,855632384 | -0,01 | 0,990836784 | -0,02 | 0,988205241 | -0,02 | 0,983682211 |
| Kcnk5     | -0,35 | 0,613058828 | -0,07 | 0,936837377 | 0,07  | 0,927950027 | -2,21 | 0,143699295 | -1,5  | 0,353136904 |
| Kcnk6     | -0,53 | 0,319925488 | -0,59 | 0,371529423 | 0,23  | 0,723987482 | -0,12 | 0,763571545 | -0,71 | 0,138718337 |
| Kcnk7     | 0,37  | 0,589124269 | -0,03 | 0,969019461 | 0,28  | 0,719420032 | 0,6   | 0,149197029 | 0,18  | 0,842266107 |
| Kcnk9     | 0,06  | 0,921652597 | 0,09  | 0,869734155 | -0,09 | 0,914301036 | 0,2   | 0,578896547 | 0,02  | 0,979392852 |
| Kcnma1    | -0,35 | 0,597519827 | 0,31  | 0,508633526 | 0,33  | 0,759937146 | -0,74 | 0,076246774 | -0,26 | 0,748678485 |
| Kcnmb1    | -0,77 | 0,48622865  | -0,39 | 0,638366221 | -0,18 | 0,877598693 | -0,72 | 0,543985364 | 0     | 0,999044789 |
| Kcnmb2    | 0,44  | 0,657929675 | -0,29 | 0,848804156 | -0,08 | 0,901300532 | 0,46  | 0,599095885 | 0,24  | 0,765809384 |
| Kcnmb3    | -0,04 | 0,96364139  | 0,13  | 0,886286684 | -0,12 | 0,868938606 | 0,03  | 0,976981885 | 0,12  | 0,899196564 |
| Kcnmb4    | -0,49 | 0,355118268 | -0,5  | 0,288643309 | -0,22 | 0,823823322 | 0,67  | 0,163828865 | 0,16  | 0,885872093 |
| Kcnmb4os1 | 0     | 0,997202263 | 0,08  | 0,910184435 | -0,24 | 0,620837479 | 0,03  | 0,968211182 | 0,06  | 0,951223734 |
| Kcnmb4os2 | -0,07 | 0,950669622 | -0,32 | 0,608466494 | -0,36 | 0,543291636 | 0,26  | 0,539202377 | 0,24  | 0,68987325  |
| Kcnn1     | 0,11  | 0,870052902 | 0,57  | 0,243029505 | -0,18 | 0,720389578 | -0,2  | 0,638108141 | 0,05  | 0,954657649 |
| Kcnn2     | -0,05 | 0,960573034 | 0,17  | 0,816543137 | 0,16  | 0,798348773 | 0,12  | 0,874701048 | 0,41  | 0,64321973  |
| Kcnn3     | 0,68  | 0,575887113 | -0,04 | 0,983613535 | 0,4   | 0,688643408 | -2,51 | 0,005660788 | -1,41 | 0,043727018 |
| Kcnn4     | 1,04  | 0,362583149 | -0,03 | 0,986742203 | 0,89  | 0,464639399 | -1,87 | 0,024372734 | -1,08 | 0,137754859 |

|          |       |             |       |             |       |             |       |             |       |             |
|----------|-------|-------------|-------|-------------|-------|-------------|-------|-------------|-------|-------------|
| Kcnq1    | -0,13 | 0,785491059 | -0,73 | 0,192998117 | 0,3   | 0,82622365  | 2,52  | 0,004876398 | -0,54 | 0,289111735 |
| Kcnq1ot1 | 0,05  | 0,954338508 | -0,02 | 0,980385701 | 0,46  | 0,462123525 | -0,16 | 0,65757228  | -0,21 | 0,767310323 |
| Kcnq2    | -0,28 | 0,545101738 | 0,36  | 0,561004864 | -0,23 | 0,746677927 | -0,08 | 0,895892607 | 0,08  | 0,934615324 |
| Kcnq3    | 0,09  | 0,904633081 | 0,07  | 0,927582737 | -0,01 | 0,987356432 | 0,1   | 0,839333217 | 0,09  | 0,927908317 |
| Kcnq4    | -0,2  | 0,782203502 | 0,04  | 0,979876012 | 0,36  | 0,649946954 | 0,59  | 0,205058711 | -0,53 | 0,427936864 |
| Kcnq5    | -0,05 | 0,963914207 | -0,1  | 0,89518658  | -0,17 | 0,841563482 | 0,05  | 0,962043341 | -0,2  | 0,852880773 |
| Kcnrg    | 0,03  | 0,975108898 | -0,23 | 0,88340343  | 0,11  | 0,881793393 | 0,4   | 0,548775366 | 0,54  | 0,697818445 |
| Kcns1    | 0,3   | 0,515553718 | 0,27  | 0,874195024 | 0,24  | 0,774812688 | 0,06  | 0,924578858 | -0,22 | 0,788112596 |
| Kcns2    | 0,15  | 0,760660571 | 0,23  | 0,629834033 | -0,06 | 0,956894731 | -0,16 | 0,797251298 | -0,05 | 0,954657649 |
| Kcns3    | 0,2   | 0,722415783 | 0,42  | 0,621330557 | -0,03 | 0,974628464 | -0,25 | 0,676010477 | -0,32 | 0,574285481 |
| Kcnt1    | 0     | 0,999288019 | 0,1   | 0,909329669 | -0,27 | 0,630413193 | -0,12 | 0,864379203 | 0,22  | 0,816013994 |
| Kcnt2    | 0,29  | 0,640002115 | -0,23 | 0,831404974 | 0,32  | 0,686445123 | -0,16 | 0,850740195 | 0,23  | 0,853060981 |
| Kcnu1    | 0,18  | 0,791150064 | 0,1   | 0,855261337 | 0,63  | 0,513307287 | 0,19  | 0,601675182 | 0,16  | 0,925858284 |
| Kcnv1    | -0,23 | 0,607696343 | -0,1  | 0,897574732 | -0,13 | 0,90345282  | 0,58  | 0,316502792 | -0,32 | 0,630151021 |
| Kcnv2    | 0,1   | 0,882060783 | -0,02 | 0,971464245 | -0,49 | 0,324602896 | 0     | 1           | 0,28  | 0,738260196 |
| Kcp      | 0,19  | 0,733886682 | 0,17  | 0,80192513  | -0,16 | 0,821865303 | 0     | 1           | -0,16 | 0,830268209 |
| Kctd1    | -0,43 | 0,493543645 | -0,45 | 0,535950767 | 0,68  | 0,530603857 | -1,55 | 0,098577249 | -0,03 | 0,984125319 |
| Kctd10   | -0,82 | 0,222236104 | -0,1  | 0,891566803 | -0,39 | 0,712506769 | -0,28 | 0,58265052  | -0,38 | 0,570730838 |
| Kctd11   | 0,19  | 0,744352714 | 0,21  | 0,671319666 | 0,37  | 0,681121299 | 0,57  | 0,084311172 | 0,05  | 0,952190189 |
| Kctd12   | -0,45 | 0,307778612 | -0,12 | 0,80157464  | -0,3  | 0,683305382 | -2,13 | 0,007149669 | 0,25  | 0,673145862 |
| Kctd12b  | -0,27 | 0,586753542 | 0,37  | 0,624712123 | -0,24 | 0,798838043 | -0,04 | 0,975655831 | -0,26 | 0,845142293 |
| Kctd13   | 0,14  | 0,816465857 | -0,41 | 0,683509429 | 0,25  | 0,726725386 | 0,08  | 0,911958998 | -0,3  | 0,706246121 |
| Kctd14   | 0,41  | 0,630710347 | 0,66  | 0,380496707 | -0,47 | 0,648579303 | -0,28 | 0,34234868  | 0,49  | 0,525980128 |
| Kctd15   | -0,2  | 0,761457464 | 0,2   | 0,846012678 | -0,13 | 0,856939356 | -0,55 | 0,219489403 | -0,45 | 0,697757911 |
| Kctd16   | 0,06  | 0,899314698 | -0,13 | 0,788506516 | -0,2  | 0,744387748 | 0,04  | 0,93129706  | -0,2  | 0,735152891 |
| Kctd17   | -0,54 | 0,202597545 | -0,26 | 0,689957982 | 0,03  | 0,970939073 | 0,84  | 0,287840988 | 0,26  | 0,781777975 |
| Kctd18   | -0,15 | 0,902628825 | -0,03 | 0,96497149  | -0,52 | 0,509702247 | -0,12 | 0,842075497 | -0,19 | 0,906031862 |
| Kctd19   | 0,01  | 0,984557405 | -0,12 | 0,889215021 | -0,25 | 0,6609968   | -0,14 | 0,837974367 | -0,39 | 0,564320697 |
| Kctd2    | 0,56  | 0,302609278 | -0,01 | 0,998271266 | 1,08  | 0,431861347 | -0,11 | 0,874701048 | 0,25  | 0,763240477 |
| Kctd20   | -0,28 | 0,584928435 | -0,11 | 0,86410431  | 0,41  | 0,647928093 | 0,39  | 0,329004867 | -0,17 | 0,765419939 |
| Kctd21   | 0,52  | 0,630133896 | 0,23  | 0,57952147  | -0,06 | 0,942303434 | -1,16 | 0,057868203 | -0,22 | 0,851265372 |
| Kctd3    | -0,33 | 0,608307071 | 0     | 1           | 0,28  | 0,786838878 | 0,73  | 0,168143396 | -0,53 | 0,524086785 |
| Kctd4    | 0,09  | 0,874688734 | -0,04 | 0,956441911 | -0,09 | 0,906007019 | -0,13 | 0,847892308 | -0,17 | 0,796713037 |
| Kctd5    | -0,16 | 0,810202145 | -0,07 | 0,901000778 | 0,23  | 0,821229302 | 1,1   | 0,338716513 | 0,06  | 0,978981442 |
| Kctd6    | -0,34 | 0,470146816 | 0,01  | 0,996259587 | 0,04  | 0,978012085 | -0,83 | 0,094204582 | 0,32  | 0,640213665 |

|        |       |             |       |             |       |             |       |             |       |             |
|--------|-------|-------------|-------|-------------|-------|-------------|-------|-------------|-------|-------------|
| Kctd7  | 0,09  | 0,952385678 | -0,63 | 0,365256482 | -0,97 | 0,12691088  | -0,19 | 0,907350266 | -0,35 | 0,823098095 |
| Kctd8  | 0,11  | 0,85354321  | 0,01  | 0,994802028 | -0,54 | 0,22996323  | 0,06  | 0,914828446 | 0,35  | 0,52464573  |
| Kctd9  | -0,69 | 0,564019844 | 0,56  | 0,594415097 | 0,82  | 0,329361684 | -0,82 | 0,190653107 | -0,8  | 0,215873518 |
| Kdelc1 | -0,13 | 0,790874426 | -0,25 | 0,714047107 | 0,77  | 0,215464432 | 0,43  | 0,351646843 | -0,57 | 0,218199508 |
| Kdelc2 | -0,52 | 0,581944492 | -0,12 | 0,902847035 | 0,28  | 0,641764537 | -0,12 | 0,917515731 | -0,24 | 0,694326198 |
| Kdelr1 | -0,23 | 0,609225855 | -0,54 | 0,43181045  | 0,23  | 0,803156935 | 0,87  | 0,087185242 | -0,47 | 0,55122001  |
| Kdelr2 | -0,38 | 0,382535925 | -0,43 | 0,401917283 | 0,71  | 0,230173776 | 1,42  | 0,102008253 | 0,1   | 0,946463658 |
| Kdelr3 | -0,42 | 0,559413848 | -0,68 | 0,310552731 | 0,54  | 0,429239919 | 3,41  | 0,002324024 | 0,26  | 0,851265372 |
| Kdf1   | -0,3  | 0,614759901 | -0,03 | 0,965147491 | 0,5   | 0,350941357 | 0,14  | 0,851024901 | -0,16 | 0,869309773 |
| Kdm1a  | 0,04  | 0,960737494 | -0,18 | 0,726494244 | 0,35  | 0,674869152 | 0,61  | 0,080543207 | -0,12 | 0,84851962  |
| Kdm1b  | -0,48 | 0,422033372 | -0,11 | 0,873601941 | 0,33  | 0,488218852 | 0,03  | 0,961377872 | 0,05  | 0,954048928 |
| Kdm2a  | -0,23 | 0,725011822 | 0,19  | 0,793476974 | 0,64  | 0,270193593 | -0,1  | 0,908141892 | -0,52 | 0,434999359 |
| Kdm2b  | -0,34 | 0,659457675 | -0,38 | 0,441593532 | -0,01 | 0,993379272 | 0,41  | 0,424033112 | -0,51 | 0,449136429 |
| Kdm3a  | 0,42  | 0,410498707 | 0,55  | 0,457889449 | 0,04  | 0,970969012 | -0,71 | 0,232954672 | 0,24  | 0,723883531 |
| Kdm3b  | 0,23  | 0,741182094 | 0,03  | 0,966078321 | 0,17  | 0,816374369 | -0,44 | 0,183219957 | 0     | 0,997769477 |
| Kdm4a  | -0,09 | 0,89081819  | -0,26 | 0,642928016 | 0,52  | 0,662451176 | 0,37  | 0,664106179 | -0,06 | 0,967747124 |
| Kdm4b  | -0,38 | 0,63699384  | 0,15  | 0,824372931 | 0,44  | 0,555082225 | -0,49 | 0,531102771 | -0,97 | 0,211018037 |
| Kdm4c  | 0,31  | 0,796629483 | 0,36  | 0,620182167 | 0,06  | 0,953456022 | -0,49 | 0,406801174 | 0,19  | 0,805797585 |
| Kdm4d  | 0,3   | 0,463855904 | 0,3   | 0,565603216 | 0,36  | 0,715497532 | 0,54  | 0,535068233 | -0,13 | 0,913379887 |
| Kdm5a  | -0,28 | 0,460231397 | -0,1  | 0,813423328 | 0,58  | 0,338633907 | 0,11  | 0,89150663  | 0,03  | 0,982321176 |
| Kdm5b  | -0,09 | 0,891798972 | 0,08  | 0,937377463 | 0,16  | 0,855171499 | 0,16  | 0,695760666 | 0,16  | 0,802268258 |
| Kdm5c  | -0,27 | 0,600952042 | 0,16  | 0,696329013 | 0,28  | 0,62463782  | 0,5   | 0,252124832 | 0,09  | 0,913274952 |
| Kdm5d  | -0,06 | 0,955200574 | -0,06 | 0,958856577 | -0,53 | 0,348577918 | 0,17  | 0,827219751 | -0,22 | 0,810276195 |
| Kdm6a  | -0,09 | 0,899314698 | 0,08  | 0,916496897 | 0,22  | 0,763233047 | -0,59 | 0,19247613  | 0,04  | 0,966951657 |
| Kdm6b  | 0,15  | 0,750634506 | 0,13  | 0,855534967 | -0,27 | 0,58580479  | -0,22 | 0,721363271 | -0,03 | 0,9807956   |
| Kdm7a  | 0,61  | 0,180356049 | 0,4   | 0,510894317 | -0,61 | 0,267648591 | 0,2   | 0,736321894 | 0,8   | 0,188143555 |
| Kdm8   | -0,96 | 0,486906643 | -0,58 | 0,666450149 | 0,03  | 0,984778342 | -0,24 | 0,915360964 | -0,32 | 0,884247878 |
| Kdr    | -1,07 | 0,056208766 | -0,53 | 0,232643343 | 0,39  | 0,530058988 | -0,54 | 0,140835759 | -0,65 | 0,1502613   |
| Kdsr   | -0,19 | 0,764189777 | 0,32  | 0,716520032 | 0,5   | 0,599222964 | -0,15 | 0,803313693 | 0,32  | 0,602530139 |
| Keap1  | 0,04  | 0,961015178 | 0,36  | 0,771641267 | -0,31 | 0,640143961 | -0,18 | 0,768036061 | 0,12  | 0,916489445 |
| Keg1   | -0,2  | 0,836877571 | 0,04  | 0,982053677 | 0,21  | 0,777417583 | -0,41 | 0,667849424 | 0,56  | 0,54339259  |
| Kel    | -0,02 | 0,975949545 | -0,18 | 0,824372931 | 0,1   | 0,871149274 | 0,2   | 0,671991774 | 0,07  | 0,937558003 |
| Kera   | 0,1   | 0,886068609 | 0,01  | 0,994137877 | -0,13 | 0,804785961 | -0,07 | 0,943143586 | -0,11 | 0,929312654 |
| Khdc1a | 0,39  | 0,686076441 | -0,07 | 0,943713379 | -0,05 | 0,963199274 | 0,22  | 0,800322194 | 0,09  | 0,925368386 |
| Khdc1b | 0,02  | 0,983765302 | 0,3   | 0,839283725 | -0,01 | 0,996397104 | 0,28  | 0,722307071 | 0,04  | 0,973428839 |

|           |       |             |       |             |       |             |       |             |       |             |
|-----------|-------|-------------|-------|-------------|-------|-------------|-------|-------------|-------|-------------|
| Khdc1c    | -0,37 | 0,580117138 | -0,07 | 0,881113709 | -0,36 | 0,595253534 | 0,08  | 0,900529161 | 0,03  | 0,975441362 |
| Khdc3     | 0,31  | 0,501724576 | -0,31 | 0,494161701 | 0,37  | 0,640924712 | 0,36  | 0,598473186 | -0,3  | 0,813405251 |
| Khdrbs1   | -0,48 | 0,187534389 | 0,06  | 0,926157704 | -0,03 | 0,979122215 | -0,07 | 0,881073643 | -0,18 | 0,75509516  |
| Khdrbs2   | 0,16  | 0,890974575 | 0,46  | 0,614530823 | -0,17 | 0,878636183 | 0,07  | 0,897599603 | 0,32  | 0,70740752  |
| Khdrbs3   | -0,68 | 0,352228774 | -0,26 | 0,661313341 | 0,36  | 0,647928093 | 0,69  | 0,097710906 | 0,15  | 0,874342066 |
| Khk       | -0,59 | 0,339877121 | 0,06  | 0,960252903 | -0,05 | 0,959505445 | -1,1  | 0,040750961 | -0,42 | 0,478324516 |
| Khbyn     | 0,58  | 0,382845839 | 1,25  | 0,284547318 | -0,45 | 0,736555563 | -0,91 | 0,46809054  | -0,14 | 0,947559952 |
| Khsrp     | -0,12 | 0,841086941 | -0,31 | 0,536246395 | 0,59  | 0,402615209 | 0,26  | 0,443514966 | -0,02 | 0,980961333 |
| Kidins220 | -0,22 | 0,661851948 | 0,04  | 0,941751202 | -0,39 | 0,62535327  | 0,09  | 0,923990041 | -0,03 | 0,982595714 |
| Kif11     | -1,26 | 0,097625832 | -2,18 | 0,087315688 | 0,87  | 0,336382165 | 2,34  | 0,070479165 | -0,69 | 0,509461732 |
| Kif12     | 0,45  | 0,491833357 | 0     | 0,998184777 | -0,49 | 0,343594254 | -0,13 | 0,799872824 | -0,3  | 0,628999683 |
| Kif13a    | -0,9  | 0,172698611 | 0,08  | 0,92856048  | 0,3   | 0,736422567 | -0,79 | 0,219489403 | -0,44 | 0,63362558  |
| Kif13b    | -0,24 | 0,535398273 | 0,04  | 0,959837002 | -0,26 | 0,721952929 | -0,38 | 0,357285182 | 0,54  | 0,272986942 |
| Kif14     | -1,24 | 0,038393911 | -0,74 | 0,560787311 | -0,29 | 0,783999367 | 0,75  | 0,182825553 | -0,33 | 0,728483022 |
| Kif15     | -1,89 | 0,087910462 | -1,5  | 0,0802723   | 1,51  | 0,173023976 | 2,49  | 0,005047331 | -0,37 | 0,652746284 |
| Kif16b    | -0,25 | 0,595245851 | 0,05  | 0,955998286 | 0,32  | 0,543309542 | -0,58 | 0,218489485 | -0,17 | 0,799340413 |
| Kif16bos  | -0,17 | 0,666546952 | -0,19 | 0,630975718 | -0,02 | 0,979791644 | 0,24  | 0,602996724 | 0,07  | 0,943668392 |
| Kif17     | 0,76  | 0,219992333 | 0,23  | 0,674643073 | -0,15 | 0,82162081  | 0,75  | 0,074454367 | 0,08  | 0,939448119 |
| Kif18a    | -0,94 | 0,353053231 | -1,36 | 0,335516054 | 1,29  | 0,006274682 | 1,6   | 0,168170796 | -0,22 | 0,879075155 |
| Kif18b    | -0,87 | 0,231892334 | -1,27 | 0,257624607 | 1,46  | 0,042631481 | 1,71  | 0,068963555 | -0,45 | 0,434997258 |
| Kif19a    | -0,2  | 0,710562363 | 0,05  | 0,917553777 | -0,08 | 0,938317564 | -0,37 | 0,612066557 | -0,62 | 0,389039445 |
| Kif1a     | 0,15  | 0,853695324 | -0,34 | 0,674948431 | -0,2  | 0,876989625 | 0,37  | 0,642906557 | 0,21  | 0,822398711 |
| Kif1b     | -0,34 | 0,341853862 | -0,36 | 0,487451484 | 0,2   | 0,823823322 | -0,13 | 0,7488665   | -0,5  | 0,325920244 |
| Kif1bp    | 0,19  | 0,698332739 | -0,18 | 0,847081019 | 0,09  | 0,938414    | -0,22 | 0,749306304 | -0,44 | 0,51267454  |
| Kif1c     | -0,6  | 0,149941264 | -0,15 | 0,794434997 | 0,66  | 0,34148526  | 0,91  | 0,144044949 | -0,41 | 0,727637428 |
| Kif20a    | -1,87 | 0,067204873 | -0,88 | 0,153524445 | 1,11  | 0,045360114 | 2,44  | 0,009344805 | -0,04 | 0,975441362 |
| Kif20b    | -1,35 | 0,257178091 | -1,66 | 0,179933873 | 1,37  | 0,191166714 | 2,37  | 0,026972102 | -0,84 | 0,155847858 |
| Kif21a    | -0,25 | 0,573267041 | 0,25  | 0,614530823 | 0,75  | 0,437315481 | -0,18 | 0,701517687 | -0,09 | 0,932742551 |
| Kif21b    | -0,02 | 0,975506993 | -0,1  | 0,859954464 | 0,1   | 0,878052731 | 0,57  | 0,209819432 | 0,23  | 0,801087157 |
| Kif22     | -1,38 | 0,237911715 | -1,73 | 0,279004862 | 1,08  | 0,050780459 | 2,85  | 0,005310772 | -0,46 | 0,611234576 |
| Kif23     | -1,1  | 0,189684245 | -1,52 | 0,212039473 | 1,9   | 0,076696168 | 2,48  | 0,018003209 | -0,34 | 0,727066601 |
| Kif24     | -0,25 | 0,619377524 | -0,96 | 0,426168855 | 0,23  | 0,834979811 | 1,27  | 0,046593278 | 0,35  | 0,608072805 |
| Kif26a    | -0,82 | 0,111767257 | -0,89 | 0,087315688 | 0,21  | 0,849342965 | 0,27  | 0,553220178 | -0,75 | 0,142592596 |
| Kif26b    | 0,1   | 0,893267276 | 0,05  | 0,961139695 | -0,52 | 0,303272695 | -0,53 | 0,335057868 | -0,56 | 0,373699539 |
| Kif27     | -0,14 | 0,832696131 | -0,15 | 0,840564791 | -0,24 | 0,760374956 | 0,41  | 0,548775366 | 0,31  | 0,734274054 |

|           |       |             |       |             |       |             |       |             |       |             |
|-----------|-------|-------------|-------|-------------|-------|-------------|-------|-------------|-------|-------------|
| Kif2a     | 0,14  | 0,832696131 | -0,14 | 0,827496723 | 0,25  | 0,811424918 | 0,36  | 0,414522125 | -0,19 | 0,801385411 |
| Kif2b     | 0,08  | 0,912842584 | -0,01 | 0,991507752 | -0,04 | 0,96858449  | -0,02 | 0,973927614 | -0,3  | 0,731211225 |
| Kif2c     | -1,01 | 0,106547713 | -0,28 | 0,862226124 | 0,71  | 0,509702247 | 1,71  | 0,221934349 | 0,49  | 0,712121015 |
| Kif3a     | -0,18 | 0,820023436 | -0,13 | 0,874195024 | 0,48  | 0,387068715 | 0,68  | 0,167766415 | 0,05  | 0,961406182 |
| Kif3b     | -0,21 | 0,868854341 | 0,22  | 0,855820898 | 0,22  | 0,833284937 | 0,29  | 0,756480303 | -0,31 | 0,818974537 |
| Kif3c     | -0,68 | 0,305287229 | -0,74 | 0,242002134 | 0,18  | 0,819410193 | 0,28  | 0,575297022 | -0,15 | 0,876418697 |
| Kif4      | -2,25 | 0,01463807  | -2,23 | 0,109998087 | 1,04  | 0,1135716   | 2,34  | 0,058680593 | -1,07 | 0,210614146 |
| Kif4-ps   | -0,25 | 0,679451519 | 0,04  | 0,930849936 | -0,3  | 0,617943722 | -0,05 | 0,908872561 | -0,04 | 0,96047099  |
| Kif5a     | 0,03  | 0,970463755 | 0,25  | 0,642541818 | -0,57 | 0,387909685 | 0,29  | 0,60273248  | 0,56  | 0,337722187 |
| Kif5b     | -0,38 | 0,392723343 | -0,12 | 0,807175471 | 0,4   | 0,373051052 | 0,19  | 0,731120883 | 0,31  | 0,654872635 |
| Kif5c     | -1,05 | 0,354424228 | -1,51 | 0,393251171 | 1,79  | 0,043998423 | 0,63  | 0,331493236 | -0,19 | 0,848977077 |
| Kif6      | -0,1  | 0,861006219 | 0,2   | 0,843313499 | -0,21 | 0,791940256 | 0,28  | 0,711725901 | 0,33  | 0,673120647 |
| Kif7      | -0,32 | 0,743755398 | 0,23  | 0,705747563 | -0,05 | 0,976522658 | -0,16 | 0,806596364 | 0,54  | 0,360726287 |
| Kif9      | 0,17  | 0,914090929 | 0,82  | 0,268073284 | -0,21 | 0,814797917 | -0,31 | 0,754339703 | -0,03 | 0,986418729 |
| Kifap3    | -0,21 | 0,753450161 | -0,53 | 0,547604305 | 0,18  | 0,8290371   | -0,18 | 0,829087694 | -0,41 | 0,662758219 |
| Kifc1     | -1,02 | 0,24877804  | -0,98 | 0,191605725 | 0,79  | 0,302861841 | 1,44  | 0,066910258 | -0,23 | 0,832848337 |
| Kifc2     | 0     | 0,997266885 | 0,13  | 0,91403018  | 0,01  | 0,990836784 | -1,24 | 0,024208191 | -0,51 | 0,291178873 |
| Kifc3     | -0,6  | 0,348931898 | 0,15  | 0,801259805 | 0,28  | 0,770526999 | -1,24 | 0,045711543 | -0,32 | 0,635195583 |
| Kifc5b    | 0,16  | 0,882119027 | -0,33 | 0,658998976 | 0,13  | 0,83603209  | -0,03 | 0,953393468 | -0,04 | 0,964225157 |
| Kin       | 0,13  | 0,844688163 | 0,45  | 0,519915586 | 0,04  | 0,967304745 | -0,2  | 0,839567244 | 0,31  | 0,821727352 |
| Kir3dl1   | -0,39 | 0,634129153 | 0,79  | 0,143113166 | 0,09  | 0,962321429 | -0,61 | 0,50808678  | -0,04 | 0,982175252 |
| Kirrel    | -0,1  | 0,907932476 | -0,14 | 0,920933203 | 0,92  | 0,391889599 | -1,22 | 0,18825829  | -1,01 | 0,391113982 |
| Kirrel2   | -0,08 | 0,91409989  | 0,11  | 0,918694468 | -0,04 | 0,963221639 | 0,05  | 0,950082402 | 0,27  | 0,718299139 |
| Kirrel3   | 0,32  | 0,7699479   | 0,02  | 0,994802028 | 0,18  | 0,863964732 | 0,12  | 0,896599656 | -0,13 | 0,900126162 |
| Kirrel3os | 0,47  | 0,578154278 | 0,43  | 0,818613446 | -0,38 | 0,622546805 | 0,54  | 0,692059018 | 0,02  | 0,990633766 |
| Kis2      | -0,09 | 0,896207658 | -0,07 | 0,945143056 | -0,12 | 0,828129261 | -0,16 | 0,637125181 | 0,2   | 0,825311688 |
| Kiss1     | -0,07 | 0,953003466 | 0,06  | 0,932292974 | 0,33  | 0,790693327 | -0,36 | 0,759123498 | -0,15 | 0,928775639 |
| Kiss1r    | -0,33 | 0,610309983 | 0,17  | 0,874356923 | 0     | 0,999931921 | -0,46 | 0,459231202 | -0,03 | 0,977903513 |
| Kit       | -0,12 | 0,816465857 | 0,13  | 0,89081665  | 0,01  | 0,997220401 | 2,77  | 0,028737348 | -0,28 | 0,813490069 |
| Kitl      | 0,02  | 0,978017159 | 0     | 1           | 0,18  | 0,805783058 | -0,17 | 0,702563225 | 0,2   | 0,773718691 |
| Kiz       | -0,57 | 0,443068183 | -0,09 | 0,919169439 | -0,21 | 0,862376532 | -0,42 | 0,531426483 | -0,35 | 0,69839069  |
| Kl        | -0,14 | 0,903817676 | 0,36  | 0,702102244 | 0,04  | 0,977126842 | -1,09 | 0,204322243 | -0,9  | 0,523184505 |
| Klb       | -0,13 | 0,818611891 | 0,47  | 0,550164999 | 0     | 0,999931921 | -0,25 | 0,434170497 | -0,14 | 0,829444633 |
| Klc1      | -0,45 | 0,435472666 | -0,08 | 0,883631611 | 0,13  | 0,894339966 | -0,06 | 0,963694658 | 0,32  | 0,765002083 |
| Klc2      | -0,38 | 0,473832525 | -0,17 | 0,670859269 | 0,3   | 0,584320897 | 0,37  | 0,621794868 | -0,25 | 0,820990019 |

|         |       |             |       |             |       |             |       |             |       |             |
|---------|-------|-------------|-------|-------------|-------|-------------|-------|-------------|-------|-------------|
| Klc3    | 0,49  | 0,260634235 | 0,09  | 0,916496897 | 0,54  | 0,46154539  | 0     | 1           | -0,19 | 0,773244301 |
| Klc4    | -0,86 | 0,168487268 | 0,52  | 0,601295905 | -0,34 | 0,735468851 | -0,4  | 0,525409031 | -0,28 | 0,839474287 |
| Klf1    | 0,18  | 0,680520303 | 0,14  | 0,85154774  | -0,18 | 0,841563482 | -0,08 | 0,893532609 | -0,15 | 0,828278125 |
| Klf10   | 0,1   | 0,827716985 | 0,12  | 0,824407967 | 0,01  | 0,993379272 | -0,25 | 0,588987424 | -0,17 | 0,797293554 |
| Klf11   | 0,1   | 0,852363306 | 0,76  | 0,212341437 | 0,11  | 0,926213449 | 0,11  | 0,847641912 | 0,7   | 0,285422876 |
| Klf12   | 0,52  | 0,680520303 | 2,04  | 0,06498412  | -0,17 | 0,890473147 | -3,18 | 0,003907268 | -0,11 | 0,884640084 |
| Klf13   | 0,09  | 0,889252203 | -0,06 | 0,927205716 | 0,03  | 0,969928932 | -0,11 | 0,848110026 | 0,06  | 0,948163009 |
| Klf14   | 0,08  | 0,875325789 | 0,03  | 0,957664564 | 0,04  | 0,968862748 | -0,15 | 0,778817721 | -0,06 | 0,947300798 |
| Klf15   | -0,4  | 0,553849378 | 0,23  | 0,709432782 | 0,01  | 0,991568687 | -1,47 | 0,049420132 | -1,09 | 0,085408557 |
| Klf16   | -0,05 | 0,964124037 | 0,54  | 0,181636532 | -0,19 | 0,906360615 | 0,35  | 0,314138392 | 0,44  | 0,426902843 |
| Klf17   | 0,15  | 0,846447446 | 0,04  | 0,941258271 | -0,36 | 0,462236716 | -0,07 | 0,947809027 | -0,14 | 0,856141339 |
| Klf2    | -0,25 | 0,644085637 | 0,57  | 0,370379226 | -0,78 | 0,225786849 | -1,56 | 0,011041643 | 0,08  | 0,913553402 |
| Klf3    | -0,19 | 0,773899768 | 0,13  | 0,855607772 | -0,41 | 0,661089127 | -0,2  | 0,660660272 | -0,21 | 0,740020498 |
| Klf4    | -0,11 | 0,818259428 | -0,13 | 0,87189957  | -0,54 | 0,312665647 | -1,79 | 0,010434748 | -0,3  | 0,587915673 |
| Klf5    | -0,07 | 0,956936108 | 0,3   | 0,505068373 | 0,79  | 0,206742363 | -0,05 | 0,938950727 | 0,05  | 0,955910202 |
| Klf6    | 0,56  | 0,166728009 | 0,42  | 0,30567226  | -0,22 | 0,673777719 | 0,87  | 0,055569548 | 0,98  | 0,047253015 |
| Klf7    | -0,01 | 0,994117687 | 0,46  | 0,604118554 | 0,17  | 0,798984195 | -1,02 | 0,066945702 | -0,06 | 0,948759136 |
| Klf8    | -1,09 | 0,09837244  | -0,47 | 0,518494408 | -0,03 | 0,990836784 | -0,27 | 0,828130298 | 0,38  | 0,750359224 |
| Klf9    | 0,05  | 0,937251448 | 0,09  | 0,919873208 | 0,08  | 0,911634383 | -1,66 | 0,038424847 | -0,24 | 0,75910997  |
| Klhdc1  | 0,12  | 0,962660554 | -0,16 | 0,797124845 | -0,38 | 0,735468851 | -1,72 | 0,113007982 | -0,4  | 0,737843954 |
| Klhdc10 | -0,85 | 0,074890017 | -0,1  | 0,923155897 | 0,01  | 0,994130625 | 0,28  | 0,644491109 | -0,11 | 0,925858284 |
| Klhdc2  | 0,06  | 0,938008954 | -0,42 | 0,67361039  | -0,03 | 0,980456257 | 0,04  | 0,958584066 | -0,03 | 0,977903513 |
| Klhdc3  | -0,62 | 0,20299588  | -0,28 | 0,641792237 | 0,04  | 0,962766843 | 0,78  | 0,118854745 | -0,41 | 0,456450979 |
| Klhdc4  | -0,37 | 0,488681054 | -0,23 | 0,694017753 | -0,15 | 0,834406595 | 0,44  | 0,233764052 | 0,11  | 0,88282824  |
| Klhdc7a | 0,63  | 0,428049245 | 0,06  | 0,932338539 | -0,3  | 0,6021281   | -0,48 | 0,286823287 | 0,16  | 0,909498485 |
| Klhdc7b | 0,04  | 0,941798404 | -0,02 | 0,989873399 | -0,07 | 0,925245169 | -0,02 | 0,970897388 | -0,05 | 0,947757536 |
| Klhdc8a | -0,25 | 0,728643996 | 0,37  | 0,677440358 | -0,01 | 0,991456043 | -1,23 | 0,06824225  | -0,32 | 0,733610761 |
| Klhdc8b | -0,12 | 0,862360472 | -0,09 | 0,924138252 | 0,2   | 0,831266864 | -0,09 | 0,901395825 | -0,27 | 0,739121045 |
| Klhdc9  | -0,54 | 0,253433585 | 0,16  | 0,786190103 | 0,09  | 0,88714939  | -0,15 | 0,669860197 | -0,06 | 0,940092696 |
| Klhl1   | 0,19  | 0,801627644 | 0,17  | 0,892675764 | 0,08  | 0,959650277 | -0,03 | 0,963343418 | 0,23  | 0,714399075 |
| Klhl10  | 0,34  | 0,655006949 | -0,27 | 0,79059518  | -0,24 | 0,740600774 | 0,35  | 0,329153336 | 0,18  | 0,766424646 |
| Klhl11  | -0,18 | 0,834672627 | 0,14  | 0,783677427 | -0,29 | 0,68573346  | -0,5  | 0,248144637 | 0,48  | 0,363979041 |
| Klhl12  | -0,1  | 0,951007775 | 0,66  | 0,498607981 | 0,49  | 0,712220746 | -0,87 | 0,133287397 | -0,23 | 0,864257719 |
| Klhl13  | -0,6  | 0,242651292 | -0,83 | 0,147942223 | -0,28 | 0,711209331 | -1,74 | 0,234473469 | -0,82 | 0,676744294 |
| Klhl14  | 0,12  | 0,903817676 | 0,35  | 0,419795665 | -0,37 | 0,599648113 | -0,17 | 0,647755156 | 0,1   | 0,923019712 |

|        |       |             |       |             |       |             |       |             |       |             |
|--------|-------|-------------|-------|-------------|-------|-------------|-------|-------------|-------|-------------|
| KIhl15 | 0,11  | 0,874467978 | 0,18  | 0,884239192 | -0,48 | 0,452474404 | -0,39 | 0,476284901 | 0,24  | 0,755982506 |
| KIhl17 | -0,58 | 0,302811898 | -0,3  | 0,60189244  | 0,12  | 0,902672106 | -0,6  | 0,25699203  | -0,36 | 0,668008337 |
| KIhl18 | -0,49 | 0,36631183  | -0,3  | 0,782652703 | -0,34 | 0,703647945 | -0,02 | 0,979829655 | -0,11 | 0,904830156 |
| KIhl2  | -0,14 | 0,923816656 | 0,08  | 0,93390955  | 0,35  | 0,515467885 | -0,24 | 0,529366123 | -0,67 | 0,214056891 |
| KIhl20 | 0,06  | 0,926692467 | -0,27 | 0,723566168 | 0,03  | 0,970992385 | 0,26  | 0,721011317 | -0,22 | 0,823098095 |
| KIhl21 | -0,28 | 0,548802885 | -0,67 | 0,402975324 | 0,22  | 0,668380345 | -0,34 | 0,37242302  | -0,04 | 0,973428839 |
| KIhl22 | -0,32 | 0,731752955 | 0,22  | 0,842885677 | -0,05 | 0,965528976 | -0,34 | 0,630714479 | -0,64 | 0,442579293 |
| KIhl23 | -1,09 | 0,322835282 | -0,11 | 0,932918674 | -0,21 | 0,847901369 | -0,52 | 0,446618091 | -0,45 | 0,545166604 |
| KIhl24 | 0,19  | 0,757032046 | 0,09  | 0,857732355 | 0,08  | 0,96043738  | -0,79 | 0,04687876  | -0,14 | 0,814864454 |
| KIhl25 | 0,24  | 0,571926173 | 0,04  | 0,965147491 | -0,16 | 0,834017354 | 0,63  | 0,303816416 | -0,26 | 0,815106351 |
| KIhl26 | -0,09 | 0,876019664 | -0,05 | 0,958545812 | 0,02  | 0,990485372 | 0,02  | 0,9642117   | -0,21 | 0,712121015 |
| KIhl28 | 0,2   | 0,827441872 | 0,16  | 0,732847182 | 0,01  | 0,993680788 | -0,5  | 0,192105937 | 0,36  | 0,456658287 |
| KIhl29 | -0,28 | 0,687662951 | -0,27 | 0,664787536 | 0,36  | 0,650169259 | 0     | 1           | -0,01 | 0,990633766 |
| KIhl3  | 0,01  | 0,996219097 | -0,42 | 0,416078069 | 0,71  | 0,53777995  | 1,09  | 0,174772815 | -0,94 | 0,362980572 |
| KIhl30 | -0,18 | 0,79498488  | -0,01 | 0,996113371 | 0     | 0,998479656 | -0,41 | 0,540243094 | -0,03 | 0,980945466 |
| KIhl31 | 0,23  | 0,664456582 | -0,09 | 0,932918674 | -0,38 | 0,649206572 | 0,22  | 0,533426462 | -0,02 | 0,986849867 |
| KIhl32 | -0,05 | 0,960597621 | -0,15 | 0,87892334  | 0,05  | 0,963199274 | -0,1  | 0,924569336 | -0,15 | 0,886502723 |
| KIhl33 | 0,12  | 0,891944919 | -0,07 | 0,896003756 | 0,3   | 0,68573346  | 0,25  | 0,618254643 | -0,56 | 0,368554903 |
| KIhl34 | -0,04 | 0,932671813 | -0,16 | 0,725256393 | -0,26 | 0,542758274 | -0,11 | 0,792997678 | 0,01  | 0,990091016 |
| KIhl35 | -0,22 | 0,645532341 | 0,33  | 0,573232957 | 0,6   | 0,379231825 | -0,28 | 0,631868374 | -0,13 | 0,894623317 |
| KIhl36 | -0,44 | 0,641528055 | -0,04 | 0,956559486 | 0,4   | 0,666305832 | 0,46  | 0,327599481 | -0,28 | 0,673577848 |
| KIhl38 | -0,21 | 0,641357042 | 0,09  | 0,895146165 | -0,3  | 0,454745767 | -0,44 | 0,25487338  | -0,27 | 0,735052158 |
| KIhl4  | -1,28 | 0,178589155 | -0,35 | 0,827178859 | 0,63  | 0,641366948 | 0,44  | 0,699968398 | -0,14 | 0,920312156 |
| KIhl40 | 0,24  | 0,56461489  | -0,09 | 0,912773944 | -0,14 | 0,835677021 | 0,11  | 0,818693228 | -0,05 | 0,947559952 |
| KIhl41 | -0,48 | 0,356554949 | -0,49 | 0,373555617 | 0,11  | 0,859411859 | 0,06  | 0,924778169 | -0,13 | 0,845218636 |
| KIhl42 | -0,19 | 0,767083571 | 0,21  | 0,62432723  | 0,61  | 0,184164925 | 0,04  | 0,945487259 | 0,02  | 0,989470761 |
| KIhl5  | -0,1  | 0,849867944 | 0,19  | 0,70995316  | 0,18  | 0,848462153 | -0,77 | 0,09777826  | -0,08 | 0,925996824 |
| KIhl6  | -0,76 | 0,3691109   | -0,24 | 0,837480636 | -0,03 | 0,987003605 | -0,42 | 0,606522367 | -0,09 | 0,945991044 |
| KIhl7  | -0,37 | 0,784558415 | -0,12 | 0,86411353  | 0,03  | 0,97960422  | 0,2   | 0,823795118 | -0,11 | 0,937593816 |
| KIhl8  | -0,15 | 0,89179679  | -0,05 | 0,98459889  | 0,34  | 0,767681595 | -0,43 | 0,62733822  | -0,33 | 0,799495162 |
| KIhl9  | 0,41  | 0,600680579 | -0,56 | 0,369700068 | 0,12  | 0,885680687 | 0,52  | 0,354848938 | -0,41 | 0,696227639 |
| KIk1   | 0,03  | 0,977608705 | -0,21 | 0,727848017 | -0,33 | 0,58160408  | -3,49 | 0,003907268 | -0,38 | 0,613970786 |
| KIk10  | 0,12  | 0,839375532 | 0,13  | 0,863233628 | -0,04 | 0,963199274 | -0,56 | 0,094204582 | -0,78 | 0,096471856 |
| KIk11  | 0,15  | 0,829299665 | -0,32 | 0,471981521 | 0,03  | 0,972708325 | -0,62 | 0,324881739 | -0,41 | 0,702558142 |
| KIk12  | 0,22  | 0,648730873 | 0,08  | 0,912137323 | -0,3  | 0,732675311 | -0,01 | 0,980890499 | -0,05 | 0,960974478 |



|           |       |             |       |             |       |             |       |             |       |             |
|-----------|-------|-------------|-------|-------------|-------|-------------|-------|-------------|-------|-------------|
| Klk13     | -0,16 | 0,800851935 | -0,25 | 0,755498335 | -0,09 | 0,9122363   | 0,49  | 0,287840988 | 0,08  | 0,960774794 |
| Klk14     | 0,11  | 0,856984761 | 0,18  | 0,763796207 | -0,04 | 0,970992385 | 0     | 1           | 0,72  | 0,32029895  |
| Klk15     | -0,39 | 0,586458491 | -0,7  | 0,279705451 | -0,25 | 0,824279952 | 0,67  | 0,480121746 | 0,46  | 0,718299139 |
| Klk1b1    | -0,26 | 0,520667704 | 0,07  | 0,947107147 | 0,15  | 0,83492007  | 0,54  | 0,102906058 | 0,07  | 0,947559952 |
| Klk1b11   | -0,51 | 0,63375987  | -0,62 | 0,538642201 | -0,38 | 0,801023264 | 0,14  | 0,890879327 | 0,42  | 0,755982506 |
| Klk1b16   | 0,21  | 0,874676538 | -0,52 | 0,48565018  | 0,05  | 0,977126842 | 0,43  | 0,393759175 | 0,08  | 0,948117662 |
| Klk1b21   | 0,12  | 0,891986094 | -0,31 | 0,499573414 | -0,05 | 0,953456022 | 0,25  | 0,429743307 | -0,11 | 0,874829878 |
| Klk1b22   | 0,06  | 0,963914207 | -0,04 | 0,932292974 | 0,32  | 0,816883729 | -0,02 | 0,971766218 | 0,08  | 0,954694993 |
| Klk1b24   | -0,92 | 0,093379419 | 0,13  | 0,783728265 | -0,49 | 0,560847022 | 0,31  | 0,549586333 | 0,24  | 0,865938897 |
| Klk1b26   | 0,51  | 0,479139678 | 0,43  | 0,461159466 | -0,17 | 0,81104918  | -0,24 | 0,632710762 | -0,19 | 0,85508146  |
| Klk1b27   | -0,07 | 0,925737471 | 0,43  | 0,313454069 | 0,36  | 0,375777962 | -0,16 | 0,696449006 | -0,33 | 0,765327693 |
| Klk1b3    | 0,07  | 0,937251448 | -0,66 | 0,275854898 | -0,14 | 0,910160525 | 0,46  | 0,393347892 | -0,15 | 0,881613493 |
| Klk1b4    | -0,3  | 0,734869056 | 0,14  | 0,897811179 | -0,37 | 0,530305099 | -0,29 | 0,722475594 | 0,51  | 0,545351562 |
| Klk1b5    | 0,59  | 0,47665759  | 0,2   | 0,904698551 | -1,1  | 0,044715282 | -1,7  | 0,027247176 | 0,02  | 0,983453096 |
| Klk1b7-ps | 0,31  | 0,640002115 | 0,07  | 0,94678208  | -0,47 | 0,287512572 | 0,22  | 0,691668858 | 0,22  | 0,765002083 |
| Klk1b8    | 0,63  | 0,481677041 | 0,25  | 0,756369219 | 0     | 0,999151822 | -0,58 | 0,535058952 | -0,58 | 0,587105866 |
| Klk1b9    | 0,1   | 0,948926586 | 0,11  | 0,810875398 | -0,06 | 0,932677966 | -0,16 | 0,765053407 | -0,01 | 0,99589352  |
| Klk4      | 0,07  | 0,946792769 | -0,1  | 0,927205716 | -0,19 | 0,747402088 | 0,19  | 0,814570338 | 0,14  | 0,907307534 |
| Klk5      | -0,09 | 0,9231839   | -0,16 | 0,825162812 | 0,19  | 0,840284573 | 0,01  | 0,984807987 | -0,36 | 0,631261214 |
| Klk6      | 0,45  | 0,228694841 | -0,17 | 0,790033542 | -0,35 | 0,660517013 | 0,68  | 0,156643538 | 0,21  | 0,833124162 |
| Klk7      | -0,01 | 0,989536427 | 0,19  | 0,765325717 | -0,34 | 0,544583457 | -0,3  | 0,523281191 | -0,15 | 0,844428433 |
| Klk8      | -0,39 | 0,506476054 | 0,44  | 0,58591598  | 0,23  | 0,792875018 | -1,32 | 0,0912012   | -0,64 | 0,351536668 |
| Klk9      | 0,06  | 0,940514265 | -0,08 | 0,933941404 | -0,26 | 0,530318769 | 0,01  | 0,991001566 | 0,11  | 0,905753594 |
| Klkb1     | 0,23  | 0,712165686 | 0,08  | 0,928036933 | -0,44 | 0,363310189 | -0,15 | 0,808343584 | 0,28  | 0,830086988 |
| Klra1     | 0,04  | 0,949833417 | 0,19  | 0,821387717 | -0,12 | 0,87078545  | 0,15  | 0,795911056 | 0,26  | 0,735152891 |
| Klra10    | 0,05  | 0,938976612 | 0,28  | 0,726455519 | 0,08  | 0,917694073 | 0,16  | 0,702311689 | 0,32  | 0,6754671   |
| Klra14-ps | 0,7   | 0,306829062 | 0,31  | 0,898238238 | -0,7  | 0,196405438 | -1,04 | 0,453295658 | -0,5  | 0,765809384 |
| Klra17    | 0,12  | 0,882500171 | -0,31 | 0,869521744 | 0,17  | 0,870542909 | 0,86  | 0,065354608 | 0,5   | 0,308256382 |
| Klra2     | 0,16  | 0,778869381 | -0,02 | 0,986782918 | -0,13 | 0,934019427 | -0,2  | 0,692059018 | -0,01 | 0,990839896 |
| Klra20    | 0,03  | 0,962660554 | 0,23  | 0,624292684 | -0,11 | 0,85833551  | 0,03  | 0,938689944 | 0,1   | 0,885318142 |
| Klra3     | 0,32  | 0,65761852  | 0,28  | 0,803283255 | -0,29 | 0,61483831  | 0,27  | 0,635086819 | 0,1   | 0,902802615 |
| Klra4     | 0,2   | 0,905025251 | -0,09 | 0,961657201 | 0,5   | 0,77115153  | 0,56  | 0,339455217 | 0,29  | 0,574285481 |
| Klra5     | 0,22  | 0,738714467 | 0,16  | 0,892141331 | 0     | 0,998229242 | -0,16 | 0,845813504 | 0,22  | 0,825966687 |
| Klra6     | 0,22  | 0,78187924  | 0,39  | 0,580257061 | -0,22 | 0,721749926 | -0,09 | 0,897089312 | -0,03 | 0,981030324 |
| Klra9     | 0,15  | 0,865055523 | 0,21  | 0,903748773 | -0,22 | 0,72976164  | 0,21  | 0,832162054 | -0,07 | 0,947257087 |

|           |       |             |       |             |       |             |       |             |       |             |
|-----------|-------|-------------|-------|-------------|-------|-------------|-------|-------------|-------|-------------|
| Klrb1     | 0,1   | 0,897455401 | 0,24  | 0,671319666 | 0,5   | 0,560847022 | -0,2  | 0,577594974 | -0,62 | 0,340006862 |
| Klrb1a    | 0,47  | 0,321830081 | 0,96  | 0,638366221 | 0,3   | 0,864598204 | 0,31  | 0,608296373 | 0,44  | 0,66855342  |
| Klrb1b    | 0,18  | 0,845794148 | -0,23 | 0,899052457 | -2,27 | 0,103686732 | -0,89 | 0,351707132 | 0,52  | 0,749218624 |
| Klrb1f    | 0,08  | 0,89763852  | 0,38  | 0,695488202 | 0,23  | 0,95204022  | -0,66 | 0,621028757 | 0,48  | 0,814438115 |
| Klrb1-ps1 | -0,16 | 0,891986094 | 0,48  | 0,601448001 | -0,26 | 0,871283127 | -0,49 | 0,512935647 | 0     | 0,997254437 |
| Klrc1     | -0,28 | 0,541417213 | -0,26 | 0,723842223 | 0,26  | 0,764615262 | -0,23 | 0,618670864 | 0,16  | 0,890957032 |
| Klrc3     | 0,45  | 0,335253487 | 0,04  | 0,969006633 | -0,14 | 0,904132011 | -0,19 | 0,841131276 | 0,1   | 0,948163009 |
| Klrd1     | 0,9   | 0,517376049 | -0,34 | 0,900801202 | -0,41 | 0,751595009 | -0,06 | 0,971311432 | 0,2   | 0,894623317 |
| Klre1     | -0,05 | 0,947630317 | -0,33 | 0,712500402 | -0,41 | 0,565822909 | -0,28 | 0,437001295 | -0,02 | 0,983613958 |
| Klrg1     | -0,01 | 0,990162934 | -0,06 | 0,945980281 | -0,82 | 0,428128781 | -0,06 | 0,901395825 | 0,3   | 0,743854135 |
| Klrg2     | -0,16 | 0,834886413 | -0,16 | 0,880892852 | 0,05  | 0,953951069 | -0,67 | 0,133699942 | -0,05 | 0,952971656 |
| Klri1     | -0,6  | 0,336358735 | 0,02  | 0,990380046 | -0,22 | 0,776419989 | 0,07  | 0,940972589 | 0,64  | 0,527807778 |
| Klri2     | -0,36 | 0,60939008  | -0,13 | 0,940897177 | 0,14  | 0,809137779 | 0,26  | 0,599910447 | -0,36 | 0,585881845 |
| Klrk1     | 0,12  | 0,928396151 | 0,54  | 0,756778611 | -0,74 | 0,264885341 | -0,61 | 0,593856968 | -0,44 | 0,708051749 |
| Kmo       | 0,2   | 0,698332739 | -0,03 | 0,984608134 | -0,11 | 0,886000685 | -0,22 | 0,710270977 | -0,4  | 0,58512161  |
| Kmt2a     | 0,25  | 0,565823399 | 0,32  | 0,651587568 | 0,17  | 0,811424918 | -0,49 | 0,232875318 | 0,33  | 0,508153495 |
| Kmt2b     | -0,44 | 0,311022075 | 0,07  | 0,926157704 | 0,01  | 0,994306831 | -0,13 | 0,801930792 | 0,05  | 0,962408022 |
| Kmt2c     | 0,38  | 0,432863869 | 0,21  | 0,716668427 | -0,01 | 0,993379272 | -1,08 | 0,029323222 | 0,21  | 0,753273319 |
| Kmt2d     | 0,03  | 0,963738127 | -0,12 | 0,842663656 | 0,25  | 0,737241227 | -0,09 | 0,884713104 | -0,38 | 0,594160648 |
| Kmt2e     | 0,32  | 0,423647165 | -0,06 | 0,915213759 | -0,25 | 0,661747229 | -0,72 | 0,075959777 | -0,07 | 0,934185668 |
| Kncn      | -0,18 | 0,758183995 | 0,45  | 0,664446076 | -0,09 | 0,911601881 | -0,09 | 0,943864463 | 0,05  | 0,969117862 |
| Kndc1     | -0,18 | 0,717407143 | 0,15  | 0,809024879 | -0,11 | 0,919913271 | 0,17  | 0,603815519 | -0,12 | 0,874829878 |
| Kng1      | 0,13  | 0,892086191 | 0,02  | 0,992175086 | 0,05  | 0,977126842 | 0,05  | 0,926719027 | 0,3   | 0,728388857 |
| Kng2      | 0,13  | 0,85160294  | 0,38  | 0,656542439 | -0,04 | 0,991240121 | -1,74 | 0,200972441 | -0,14 | 0,952296554 |
| Knop1     | -0,15 | 0,795659022 | -0,29 | 0,493482658 | 0,27  | 0,758166018 | 1,41  | 0,01968311  | -0,1  | 0,905196851 |
| Knstrn    | -1,55 | 0,083335073 | -0,57 | 0,491931702 | 0,81  | 0,123010326 | 1,38  | 0,016293976 | -1    | 0,267677873 |
| Kntc1     | -0,92 | 0,404203599 | -1,72 | 0,152199284 | 1,36  | 0,055155539 | 2,1   | 0,037267515 | 0,01  | 0,992607235 |
| Kpna1     | -0,23 | 0,749904144 | -0,09 | 0,85597055  | 0,52  | 0,518687385 | 0,13  | 0,892186579 | -0,77 | 0,290772983 |
| Kpna2     | -0,8  | 0,36240006  | -0,64 | 0,205020485 | 0,9   | 0,409295824 | 1,03  | 0,042119381 | -0,08 | 0,938265452 |
| Kpna3     | 0,55  | 0,287459734 | 0,6   | 0,284547318 | 0,03  | 0,983471086 | 1,72  | 0,013836074 | 1,11  | 0,039082761 |
| Kpna4     | -0,14 | 0,810208393 | 0,29  | 0,671319666 | -0,33 | 0,590619197 | 0,15  | 0,874701048 | 0,64  | 0,351204278 |
| Kpna6     | -0,39 | 0,61200942  | -0,01 | 0,997700959 | 0,61  | 0,204247489 | 0,4   | 0,667849424 | -0,37 | 0,726042963 |
| Kpna7     | -0,06 | 0,924097714 | 0,09  | 0,912137323 | -0,04 | 0,962542727 | 0,19  | 0,665334658 | -0,02 | 0,980961333 |
| Kpnb1     | -0,42 | 0,333853344 | -0,21 | 0,622603765 | 0,25  | 0,777918093 | 0,9   | 0,093477927 | 0,24  | 0,716951751 |
| Kprp      | 0,09  | 0,892823025 | 0,28  | 0,473401429 | -0,19 | 0,804607903 | -0,12 | 0,806497386 | 0,16  | 0,835191    |

|         |       |             |       |             |       |             |       |             |       |             |
|---------|-------|-------------|-------|-------------|-------|-------------|-------|-------------|-------|-------------|
| Kptn    | -0,23 | 0,866887487 | -0,12 | 0,885885817 | 0,6   | 0,583916556 | 0,01  | 0,997685776 | -0,14 | 0,915356549 |
| Kras    | 0     | 0,998075277 | 0,07  | 0,961709816 | 0,8   | 0,312665647 | -0,3  | 0,665234661 | 0,31  | 0,567395285 |
| Krba1   | -0,06 | 0,957427783 | -0,39 | 0,564634931 | -0,36 | 0,622546805 | -0,38 | 0,582946737 | -0,11 | 0,936278784 |
| Krcc1   | -0,12 | 0,857594729 | 0,02  | 0,992929085 | 0,25  | 0,806941936 | 0,18  | 0,759281029 | 0,47  | 0,435557005 |
| Kremen1 | -0,02 | 0,981889402 | -0,53 | 0,451110045 | 0,87  | 0,295720005 | -0,2  | 0,800322194 | -0,51 | 0,308757362 |
| Kremen2 | 0,22  | 0,719547217 | -0,11 | 0,907681039 | -0,23 | 0,689014794 | -0,58 | 0,63007404  | -0,85 | 0,401301386 |
| Kri1    | 0,22  | 0,782444477 | 0,17  | 0,861828582 | -0,12 | 0,929272323 | -0,18 | 0,685829721 | 0,12  | 0,860413149 |
| Krit1   | -0,01 | 0,993728727 | 0,23  | 0,703923817 | -0,16 | 0,820823892 | 0,18  | 0,808183592 | 0,5   | 0,439301508 |
| Krr1    | -0,12 | 0,947630317 | -0,06 | 0,965039248 | 0,96  | 0,142272657 | -0,22 | 0,594539874 | -0,61 | 0,508751714 |
| Krt1    | 0,17  | 0,794588318 | -0,24 | 0,785573503 | -0,05 | 0,955376265 | 0,11  | 0,813541536 | 0,09  | 0,92132927  |
| Krt10   | 0,38  | 0,300076026 | -0,2  | 0,781665479 | 0,39  | 0,56948206  | 0,25  | 0,676391555 | 0,19  | 0,82794257  |
| Krt12   | -0,43 | 0,357054834 | -0,2  | 0,695689103 | 0,14  | 0,886433055 | 0,43  | 0,549085123 | 0,35  | 0,748520754 |
| Krt13   | -0,12 | 0,828665988 | 0,18  | 0,802788292 | -0,03 | 0,982648972 | 0,12  | 0,870547745 | 0,15  | 0,89761151  |
| Krt14   | -0,46 | 0,714793039 | -0,07 | 0,948496432 | 1,12  | 0,271482188 | 0,22  | 0,671576377 | 0,68  | 0,335268519 |
| Krt15   | -0,45 | 0,505077442 | 0,49  | 0,472760732 | -0,18 | 0,861567666 | -0,22 | 0,814570338 | 0,28  | 0,844079844 |
| Krt16   | -0,14 | 0,786709661 | -0,12 | 0,882847123 | 0,12  | 0,890842571 | -0,02 | 0,982212444 | -0,03 | 0,984125319 |
| Krt17   | -0,19 | 0,776093771 | 0,23  | 0,85334049  | 0,3   | 0,734556263 | -0,32 | 0,656888849 | -0,24 | 0,832168029 |
| Krt18   | 0,07  | 0,908281692 | -0,04 | 0,984812702 | 1,11  | 0,180063257 | -0,43 | 0,502823627 | 0,43  | 0,71579227  |
| Krt19   | 0,31  | 0,641528055 | 0,74  | 0,333537535 | 1,25  | 0,278012027 | -0,91 | 0,18955159  | -0,23 | 0,86809582  |
| Krt2    | 0,42  | 0,363136841 | 0,15  | 0,912379377 | -0,19 | 0,864598204 | 0,46  | 0,588987424 | 0,31  | 0,781405349 |
| Krt20   | -0,11 | 0,930710746 | -1,66 | 0,109267475 | 0,08  | 0,953894208 | 3,9   | 0,003977829 | 0,09  | 0,92519473  |
| Krt222  | -0,12 | 0,902939265 | -0,85 | 0,335724646 | -0,19 | 0,885853986 | 1,29  | 0,116267286 | -0,3  | 0,806246741 |
| Krt23   | 0,09  | 0,930509569 | 0,21  | 0,598869078 | -0,11 | 0,960622365 | -0,35 | 0,625618499 | -0,93 | 0,257751018 |
| Krt24   | 0,35  | 0,498560785 | 0,33  | 0,486104864 | 0,04  | 0,970673334 | 0,15  | 0,813331314 | 0,08  | 0,959573673 |
| Krt25   | 0,19  | 0,866788377 | -0,28 | 0,647475869 | 0,01  | 0,993379272 | -0,62 | 0,362347224 | -0,45 | 0,656756924 |
| Krt26   | -0,16 | 0,829889828 | 0,11  | 0,935329426 | 0,01  | 0,993379272 | 0,05  | 0,920640884 | -0,04 | 0,97206128  |
| Krt27   | -0,13 | 0,785012364 | -0,02 | 0,996203965 | 0,08  | 0,922318683 | -0,34 | 0,611276029 | -0,16 | 0,890833196 |
| Krt28   | -0,07 | 0,953003466 | 0,1   | 0,932292974 | 0,31  | 0,835677021 | -0,26 | 0,604127556 | -0,06 | 0,951429597 |
| Krt31   | -0,49 | 0,21284035  | 0,71  | 0,189188213 | -0,29 | 0,783928849 | -0,57 | 0,53119208  | -0,15 | 0,917356423 |
| Krt32   | 0,69  | 0,289213915 | 0,15  | 0,792112243 | -0,39 | 0,533114844 | -0,08 | 0,87811903  | -0,19 | 0,851207222 |
| Krt33a  | -0,81 | 0,301230942 | 0,06  | 0,96237563  | -0,65 | 0,339425194 | -0,39 | 0,709459337 | -0,29 | 0,862867603 |
| Krt33b  | 0,14  | 0,806353432 | 0,16  | 0,839789639 | -0,5  | 0,598179126 | 0,31  | 0,718323562 | 0,24  | 0,800540569 |
| Krt34   | 0,09  | 0,883130741 | 0,61  | 0,559617305 | 0,42  | 0,651996539 | 0,1   | 0,920036779 | 0,58  | 0,278096307 |
| Krt35   | 0,14  | 0,856118781 | 0,31  | 0,664787536 | -0,67 | 0,281512904 | -0,39 | 0,554324194 | -0,15 | 0,871075406 |
| Krt36   | 0,23  | 0,617280733 | -0,15 | 0,870380105 | -0,37 | 0,404341148 | 0,24  | 0,56246056  | 0,73  | 0,166595171 |

|            |       |             |       |             |       |             |       |             |       |             |
|------------|-------|-------------|-------|-------------|-------|-------------|-------|-------------|-------|-------------|
| Krt39      | 0,09  | 0,867664049 | 0,29  | 0,772036397 | -0,39 | 0,500278506 | 0,14  | 0,718553452 | 0,19  | 0,830788023 |
| Krt4       | 0,18  | 0,846313357 | 0,42  | 0,802979985 | 0,31  | 0,599202081 | -0,13 | 0,860410443 | 0,03  | 0,980961333 |
| Krt40      | -0,23 | 0,697496197 | 0,01  | 0,993789602 | -0,43 | 0,47647024  | -0,16 | 0,829087694 | -0,34 | 0,677687906 |
| Krt42      | -0,01 | 0,993175772 | 0,07  | 0,886728509 | 0,12  | 0,904844142 | 0,19  | 0,780657127 | -0,04 | 0,97425848  |
| Krt5       | -0,14 | 0,936354359 | 0,27  | 0,882589938 | -0,28 | 0,770526999 | -0,73 | 0,325923875 | -0,9  | 0,221488709 |
| Krt6a      | -0,33 | 0,656034838 | -0,12 | 0,910284662 | 0     | 0,999931921 | 0,72  | 0,278825037 | 0,33  | 0,823098095 |
| Krt6b      | -0,08 | 0,948926586 | 0,44  | 0,702406882 | 0,28  | 0,756462507 | -0,31 | 0,560541875 | -0,32 | 0,774518756 |
| Krt7       | -0,52 | 0,592782174 | -0,32 | 0,667757755 | 2,01  | 0,092642031 | -0,55 | 0,466014045 | -0,03 | 0,980961333 |
| Krt71      | -0,25 | 0,831744184 | -0,43 | 0,479666488 | -0,14 | 0,935887545 | -0,37 | 0,466413903 | -0,78 | 0,299637842 |
| Krt72      | 0,3   | 0,707480624 | 0,13  | 0,831404974 | -0,33 | 0,547279853 | 0,25  | 0,791002513 | 0,21  | 0,858561604 |
| Krt73      | 0,12  | 0,898746854 | -0,37 | 0,687527972 | 0,11  | 0,899397874 | 0,29  | 0,649456235 | -0,27 | 0,8244614   |
| Krt74      | 0,11  | 0,922118639 | 0,06  | 0,951375162 | -0,47 | 0,647988621 | -0,13 | 0,896599656 | 0,44  | 0,554828063 |
| Krt75      | 0,25  | 0,688503606 | -0,29 | 0,683761476 | 0,16  | 0,842919139 | -0,07 | 0,949239972 | -0,8  | 0,508153495 |
| Krt76      | 0,31  | 0,683595325 | 0,45  | 0,561842393 | -0,02 | 0,988661889 | -0,64 | 0,582839576 | -0,18 | 0,85419686  |
| Krt77      | 0,03  | 0,975506993 | 0     | 1           | 0,19  | 0,811994297 | 0,14  | 0,768880868 | 0,04  | 0,978604922 |
| Krt78      | -0,22 | 0,704720946 | 0,41  | 0,430298258 | 0,01  | 0,995537374 | 0,04  | 0,962167676 | -0,09 | 0,914908475 |
| Krt79      | 0,07  | 0,898746854 | -0,28 | 0,815708197 | 0,41  | 0,529358903 | 0,16  | 0,898722195 | 0,21  | 0,863363711 |
| Krt8       | -0,07 | 0,923180948 | -0,17 | 0,805949528 | 1,66  | 0,036818657 | -0,55 | 0,299269913 | 0,01  | 0,992370267 |
| Krt80      | -0,32 | 0,623477141 | 0,08  | 0,954307545 | 0,99  | 0,243651661 | -3,94 | 0,004609582 | -1,06 | 0,104257693 |
| Krt81      | -0,02 | 0,979910955 | -0,07 | 0,903595287 | 0,19  | 0,796513761 | -0,16 | 0,708385284 | -0,06 | 0,951223734 |
| Krt82      | 0,45  | 0,355000259 | -0,15 | 0,935984823 | -0,28 | 0,758158004 | 0,7   | 0,181412666 | 1,25  | 0,064823721 |
| Krt83      | -0,52 | 0,600344746 | 0,33  | 0,818072947 | -0,31 | 0,629611104 | -0,03 | 0,963465533 | 0,47  | 0,581802025 |
| Krt84      | 0,14  | 0,897077512 | 0,09  | 0,877054832 | -0,08 | 0,946810097 | 0,17  | 0,876247018 | -0,11 | 0,953993222 |
| Krt85      | -0,02 | 0,973255755 | 0     | 1           | 0,03  | 0,961464515 | -0,04 | 0,929835301 | 0,19  | 0,792404969 |
| Krt86      | 0,18  | 0,717407143 | 0,2   | 0,85451379  | 0,04  | 0,987563007 | 0,25  | 0,502511554 | 0     | 0,997070668 |
| Krt9       | 0,24  | 0,744242499 | 0     | 1           | -0,08 | 0,91560558  | 0,43  | 0,665334658 | 0,33  | 0,7983507   |
| Krtap10-10 | -0,32 | 0,490731724 | 0,1   | 0,824407967 | -0,08 | 0,927978381 | 0,12  | 0,825319974 | -0,03 | 0,983469081 |
| Krtap10-4  | 0,3   | 0,46691413  | -0,09 | 0,894640653 | -0,18 | 0,789802954 | 0,09  | 0,87811903  | 0,08  | 0,922921816 |
| Krtap11-1  | 0,54  | 0,194977962 | -0,27 | 0,667448986 | -0,28 | 0,679432905 | 0,32  | 0,590792626 | 0,41  | 0,64987147  |
| Krtap12-1  | 0,16  | 0,721378796 | 0,19  | 0,853569707 | -0,38 | 0,552370922 | -0,13 | 0,721172766 | 0,16  | 0,821613967 |
| Krtap13    | 0,16  | 0,708296676 | 0,16  | 0,732044571 | -0,02 | 0,976042637 | -0,09 | 0,807985473 | 0,01  | 0,992694729 |
| Krtap1-3   | -0,23 | 0,64776317  | -0,13 | 0,852461907 | 0,11  | 0,911634383 | -0,07 | 0,953222061 | -0,21 | 0,854494093 |
| Krtap13-1  | 0,08  | 0,92069393  | -0,24 | 0,589100557 | 0,04  | 0,957152002 | 0,24  | 0,464815834 | 0     | 0,999150346 |
| Krtap14    | -0,03 | 0,948926586 | 0,06  | 0,905051067 | 0,07  | 0,921956183 | -0,03 | 0,940267619 | -0,08 | 0,912733818 |
| Krtap1-4   | 0,2   | 0,689253784 | -0,04 | 0,937377463 | -0,13 | 0,867571963 | 0,27  | 0,504617071 | 0,09  | 0,91314596  |

|            |       |             |       |             |       |             |       |             |       |             |
|------------|-------|-------------|-------|-------------|-------|-------------|-------|-------------|-------|-------------|
| Krtap15    | 0,16  | 0,736503749 | 0,04  | 0,945143056 | -0,15 | 0,770020166 | 0,07  | 0,870487162 | 0,1   | 0,888946801 |
| Krtap1-5   | 0,02  | 0,972720447 | 0,3   | 0,691896895 | 0,14  | 0,867375348 | -0,24 | 0,633489317 | -0,16 | 0,797293554 |
| Krtap16-1  | 0,3   | 0,531163951 | 0,18  | 0,702517334 | -0,1  | 0,909963525 | 0,08  | 0,829545259 | 0,15  | 0,832781095 |
| Krtap16-3  | -0,16 | 0,720132176 | -0,08 | 0,896322235 | -0,13 | 0,850171327 | 0,15  | 0,74236057  | 0,08  | 0,918865935 |
| Krtap17-1  | -0,06 | 0,89785374  | -0,03 | 0,969019461 | -0,16 | 0,747767515 | 0,15  | 0,720329719 | 0,01  | 0,98653183  |
| Krtap19-1  | 0,38  | 0,424837852 | 0,03  | 0,966078321 | -0,17 | 0,746677927 | -0,1  | 0,817367025 | 0,18  | 0,79248985  |
| Krtap19-2  | -0,16 | 0,686076441 | -0,38 | 0,455482066 | 0,09  | 0,894229514 | 0,02  | 0,979829655 | -0,04 | 0,968038677 |
| Krtap19-3  | 0,23  | 0,755100499 | 0,35  | 0,785244931 | 0,05  | 0,956894731 | 0,41  | 0,321226406 | 0,26  | 0,731050468 |
| Krtap19-4  | 0,15  | 0,829299665 | -0,06 | 0,930192503 | -0,09 | 0,910160525 | 0,2   | 0,664536107 | 0,08  | 0,937558003 |
| Krtap19-5  | -0,39 | 0,493929    | 0,02  | 0,99149407  | -0,25 | 0,678468552 | -0,27 | 0,717305989 | -0,44 | 0,593599703 |
| Krtap20-2  | -0,27 | 0,535827944 | -0,19 | 0,679801103 | -0,31 | 0,609299753 | 0,02  | 0,968311421 | -0,13 | 0,847312006 |
| Krtap21-1  | 0,11  | 0,813201941 | -0,21 | 0,723630497 | -0,01 | 0,994321552 | 0,3   | 0,595767103 | -0,23 | 0,765809384 |
| Krtap22-2  | 0,1   | 0,844285362 | 0,14  | 0,817367084 | 0,29  | 0,478722042 | 0,11  | 0,760495197 | 0,07  | 0,945291688 |
| Krtap2-4   | 0,01  | 0,981676548 | -0,03 | 0,954024651 | -0,05 | 0,958885013 | -0,16 | 0,698362346 | -0,03 | 0,970815167 |
| Krtap24-1  | 0,06  | 0,909284689 | -0,05 | 0,956935029 | 0,04  | 0,963199274 | 0,16  | 0,732130462 | -0,04 | 0,975441362 |
| Krtap26-1  | -0,73 | 0,384432433 | -0,16 | 0,738394549 | 0,49  | 0,509702247 | 0,41  | 0,302626236 | 0,17  | 0,863806504 |
| Krtap27-1  | 0,08  | 0,88886575  | 0     | 1           | -0,26 | 0,530318769 | 0,06  | 0,878569859 | 0,34  | 0,476827734 |
| Krtap28-13 | 0,11  | 0,793172703 | 0,03  | 0,953355735 | -0,06 | 0,934893656 | 0     | 1           | 0,17  | 0,829280005 |
| Krtap3-1   | -0,09 | 0,850851423 | 0,01  | 0,990251808 | -0,02 | 0,97674065  | 0,05  | 0,907108675 | 0,03  | 0,96918257  |
| Krtap31-1  | 0,1   | 0,886913172 | -0,04 | 0,943915456 | -0,5  | 0,243511638 | -0,08 | 0,87613802  | -0,14 | 0,872665918 |
| Krtap31-2  | 0,38  | 0,480468471 | 0,05  | 0,975959817 | 0,11  | 0,909963525 | -0,06 | 0,921588853 | -0,12 | 0,887859063 |
| Krtap3-2   | 0,01  | 0,986216037 | -0,01 | 0,987282412 | -0,54 | 0,471873683 | -0,03 | 0,943864463 | -0,02 | 0,98366735  |
| Krtap3-3   | -0,34 | 0,496008309 | 0,45  | 0,269454176 | -0,3  | 0,600593409 | -0,22 | 0,561182346 | 0,19  | 0,770107638 |
| Krtap4-1   | 0,09  | 0,869509968 | -0,11 | 0,813725576 | -0,16 | 0,835677021 | 0,03  | 0,945619692 | 0     | 0,996197742 |
| Krtap4-16  | -0,16 | 0,815595316 | -0,17 | 0,828219939 | 0,03  | 0,983189886 | 0,04  | 0,958825635 | 0,3   | 0,779912857 |
| Krtap4-2   | 0,03  | 0,961472247 | -0,06 | 0,945920068 | 0,12  | 0,83442082  | 0,14  | 0,756811451 | 0,11  | 0,898309858 |
| Krtap4-6   | -0,08 | 0,893137556 | -0,01 | 0,996865461 | -0,08 | 0,906314726 | -0,03 | 0,954851353 | 0,06  | 0,954321967 |
| Krtap4-7   | 0,14  | 0,827974901 | -0,17 | 0,825984851 | -0,09 | 0,880314343 | 0,19  | 0,656038987 | -0,09 | 0,909596996 |
| Krtap4-8   | 0,09  | 0,85309792  | -0,22 | 0,71637181  | 0,05  | 0,950846671 | 0,37  | 0,62296101  | 0,02  | 0,985269236 |
| Krtap4-9   | 0,07  | 0,889978058 | 0,1   | 0,88928164  | 0,1   | 0,899473837 | -0,03 | 0,970897388 | -0,05 | 0,962820357 |
| Krtap5-1   | 0,08  | 0,893492748 | -0,14 | 0,860602717 | 0,13  | 0,908400411 | 0,11  | 0,806596364 | 0,14  | 0,830813323 |
| Krtap5-2   | -0,05 | 0,934682167 | 0     | 1           | 0,06  | 0,922318683 | 0,3   | 0,646131191 | -0,05 | 0,95985938  |
| Krtap5-3   | 0,06  | 0,94434357  | 0,17  | 0,719337405 | -0,18 | 0,747847718 | -0,02 | 0,978782666 | 0,14  | 0,869148467 |
| Krtap5-4   | 0,41  | 0,420241977 | 0,31  | 0,786394409 | -0,14 | 0,861877024 | 0,07  | 0,927360713 | 0,18  | 0,823776279 |
| Krtap5-5   | -0,13 | 0,778869381 | 0,05  | 0,926157704 | -0,02 | 0,977909553 | 0,2   | 0,5508774   | -0,11 | 0,875421436 |

|          |       |             |       |             |       |             |       |             |       |             |
|----------|-------|-------------|-------|-------------|-------|-------------|-------|-------------|-------|-------------|
| Krtap6-1 | -0,14 | 0,753482572 | 0,1   | 0,842824184 | -0,12 | 0,838740214 | 0,02  | 0,970247298 | -0,02 | 0,980961333 |
| Krtap6-2 | -0,07 | 0,933340518 | 0,01  | 0,996113371 | 0,06  | 0,929871006 | 0,02  | 0,9702918   | -0,09 | 0,892912029 |
| Krtap6-3 | -0,15 | 0,746343376 | -0,27 | 0,620450121 | -0,01 | 0,992919703 | 0,21  | 0,545758277 | 0,07  | 0,928671864 |
| Krtap6-5 | -0,09 | 0,868980208 | -0,02 | 0,986782918 | -0,29 | 0,510706849 | 0,09  | 0,829591443 | -0,02 | 0,98384409  |
| Krtap7-1 | 0,04  | 0,953506048 | 0,33  | 0,537063661 | -0,18 | 0,784775459 | -0,04 | 0,937855929 | 0,22  | 0,74624632  |
| Krtap8-1 | 0,2   | 0,655130976 | -0,04 | 0,959673534 | 0,1   | 0,850171327 | 0,15  | 0,670240531 | -0,26 | 0,628382378 |
| Krtap9-3 | 0,05  | 0,923349694 | 0,04  | 0,958856577 | -0,39 | 0,527365464 | -0,69 | 0,325923875 | -0,16 | 0,810820885 |
| Krtap9-5 | -0,06 | 0,897717279 | 0,01  | 0,98459889  | -0,17 | 0,717856288 | 0,15  | 0,666880163 | 0,19  | 0,750504485 |
| Krtcap2  | 0,17  | 0,764288636 | -0,07 | 0,907186434 | 0,07  | 0,928152403 | 0,58  | 0,19247613  | 0,14  | 0,86493772  |
| Krtcap3  | 0,25  | 0,61660035  | 0,52  | 0,459417799 | 0,45  | 0,568619313 | -0,21 | 0,829596652 | 0,31  | 0,814962655 |
| Krtdap   | -0,11 | 0,889252203 | 0,4   | 0,508633526 | -0,33 | 0,525871472 | -0,33 | 0,516439928 | 0,19  | 0,832848337 |
| Ksr1     | -0,49 | 0,394597498 | -0,04 | 0,982993454 | 0,36  | 0,661089127 | -0,57 | 0,40199632  | -0,27 | 0,70401038  |
| Ksr2     | 0,24  | 0,705404186 | 0,18  | 0,859585789 | -0,05 | 0,95106142  | -0,15 | 0,85301747  | 0,17  | 0,823098095 |
| Kti12    | -0,69 | 0,20299588  | -0,15 | 0,708738408 | 0,34  | 0,420043356 | -0,08 | 0,891764078 | -0,18 | 0,779912857 |
| Ktn1     | 0,23  | 0,66609472  | 0,25  | 0,728434379 | -0,1  | 0,904600535 | 0,28  | 0,602847218 | 0,62  | 0,231857792 |
| Kxd1     | 0,27  | 0,640236418 | 0,25  | 0,654778612 | -0,41 | 0,620837479 | -0,04 | 0,972244785 | -0,1  | 0,932056921 |
| Ky       | 0,08  | 0,948926586 | 0,01  | 0,997344247 | -0,27 | 0,703647945 | 0,02  | 0,985897275 | 0,01  | 0,992022739 |
| Kynu     | -0,2  | 0,676906193 | -0,01 | 0,991274777 | -0,09 | 0,923350407 | -0,28 | 0,647770751 | 0,31  | 0,715300768 |
| L1cam    | -0,72 | 0,387558354 | -0,45 | 0,74583457  | 0,23  | 0,736837174 | -0,49 | 0,470000798 | -0,08 | 0,957644416 |
| L1td1    | 0,18  | 0,774822327 | 0,46  | 0,368655782 | -0,41 | 0,382966103 | -0,32 | 0,46809054  | -0,14 | 0,85508146  |
| L2hgdh   | 0,33  | 0,698641317 | -0,16 | 0,87464113  | -0,17 | 0,841563482 | 0,51  | 0,493668744 | -0,11 | 0,896355106 |
| L3hypdh  | -0,42 | 0,698332739 | -0,36 | 0,667502888 | 0,6   | 0,529853952 | -0,2  | 0,820745707 | -1,49 | 0,043727018 |
| L3mbtl1  | -0,4  | 0,573661766 | -0,17 | 0,84786877  | 0,61  | 0,342219539 | -0,2  | 0,692483691 | -0,12 | 0,881968395 |
| L3mbtl2  | -0,4  | 0,492894586 | -0,4  | 0,678753304 | 0,53  | 0,603407852 | 0,1   | 0,933070045 | 0,06  | 0,960974478 |
| L3mbtl3  | -0,38 | 0,534017117 | 0,41  | 0,736902992 | 0,33  | 0,701501564 | 0,22  | 0,744192947 | -1,03 | 0,064929499 |
| L3mbtl4  | -0,01 | 0,991919022 | 0,05  | 0,943915456 | 0,01  | 0,997268369 | 0,34  | 0,566850346 | 0,49  | 0,581814709 |
| I7Rn6    | 0,11  | 0,783200207 | -0,1  | 0,892869412 | 0,08  | 0,963199274 | 0,57  | 0,21094551  | 0     | 0,99981982  |
| Lacc1    | 0,56  | 0,473832525 | 0,13  | 0,916730432 | 0,53  | 0,64759465  | 0,64  | 0,224042353 | 0,51  | 0,223294439 |
| Lace1    | -0,16 | 0,846216924 | -0,4  | 0,693801752 | 0,2   | 0,868312046 | -0,6  | 0,42854479  | 0,07  | 0,95284634  |
| Lactb    | -0,43 | 0,508688727 | -0,33 | 0,562637628 | -0,24 | 0,820240134 | 0,49  | 0,163858645 | 0,02  | 0,982813638 |
| Lactb2   | 0,09  | 0,91366065  | 0,21  | 0,829203986 | 0,09  | 0,923145082 | -0,74 | 0,226286594 | -0,39 | 0,617249007 |
| Lactbl1  | 0,09  | 0,895790136 | 0,17  | 0,726494244 | 0,2   | 0,765570799 | 0,27  | 0,472853425 | 0,23  | 0,697818445 |
| Lad1     | 0,08  | 0,942166261 | 0,08  | 0,923044405 | 0,62  | 0,506222058 | -0,36 | 0,664816872 | 0,24  | 0,823776279 |
| Lag3     | 0,86  | 0,201115501 | 0,84  | 0,101989421 | 0,3   | 0,695705149 | -0,24 | 0,792001973 | 0     | 0,999044789 |
| Lage3    | -0,29 | 0,612107783 | -0,32 | 0,540772465 | 0,17  | 0,816883729 | -0,17 | 0,774029798 | -0,32 | 0,601753447 |

|         |       |             |       |             |       |             |       |             |       |             |
|---------|-------|-------------|-------|-------------|-------|-------------|-------|-------------|-------|-------------|
| Lair1   | -0,11 | 0,884171483 | 0,42  | 0,810418074 | 0,83  | 0,208091516 | 0,14  | 0,85301747  | -0,21 | 0,810820885 |
| Lalba   | -1,76 | 0,04197452  | -0,83 | 0,605851161 | 1,53  | 0,204539631 | 2,75  | 0,006048812 | -0,42 | 0,572917283 |
| Lama1   | 0,21  | 0,721378796 | -0,01 | 0,9860901   | -0,34 | 0,464302117 | 0,35  | 0,32685814  | 0,03  | 0,970895331 |
| Lama2   | -0,15 | 0,867692799 | -0,37 | 0,43181045  | -0,15 | 0,818595679 | -0,16 | 0,761591561 | -0,39 | 0,493919589 |
| Lama3   | -0,15 | 0,897481914 | 0,13  | 0,860629851 | 0,37  | 0,737241227 | -1,78 | 0,014017268 | -0,37 | 0,547669111 |
| Lama4   | -0,6  | 0,13473547  | -0,38 | 0,341980182 | 0,29  | 0,603802059 | 2,44  | 0,003707586 | -0,68 | 0,257751018 |
| Lama5   | -0,42 | 0,431394932 | -0,29 | 0,556121114 | 0,63  | 0,253744799 | -0,41 | 0,284968897 | -0,33 | 0,555315018 |
| Lamb1   | -0,61 | 0,214430522 | -0,27 | 0,494859861 | 0,42  | 0,402615209 | 3,71  | 0,002060248 | -0,86 | 0,052231507 |
| Lamb2   | -0,47 | 0,247531815 | 0,06  | 0,926353869 | 0,07  | 0,941063967 | -2,18 | 0,004331967 | -0,8  | 0,070962571 |
| Lamb3   | -0,3  | 0,76418341  | -0,26 | 0,729172466 | 1,35  | 0,038316852 | 0,13  | 0,761222674 | -0,32 | 0,712121015 |
| Lamc1   | -0,74 | 0,089531229 | -0,38 | 0,371450754 | 0,33  | 0,515467885 | 1,45  | 0,011121575 | -0,4  | 0,415499617 |
| Lamc2   | -0,3  | 0,719765184 | 0,36  | 0,628779499 | 1,61  | 0,088283242 | -0,34 | 0,502230334 | -0,43 | 0,625044384 |
| Lamc3   | 0,21  | 0,857585372 | -0,38 | 0,318798133 | -0,25 | 0,675674731 | -1,86 | 0,01517378  | -0,82 | 0,354899019 |
| Lamp1   | 0,13  | 0,778869381 | 0,2   | 0,722181333 | 0,03  | 0,978554254 | -0,2  | 0,710855553 | 0,06  | 0,954321967 |
| Lamp2   | 0,67  | 0,154393404 | 0,45  | 0,383504117 | -0,48 | 0,445150751 | -0,35 | 0,279480391 | 0,33  | 0,520481    |
| Lamp3   | -0,15 | 0,804145128 | -0,1  | 0,954948291 | 0,08  | 0,925245169 | -0,03 | 0,983462169 | 0,04  | 0,975441362 |
| Lamp5   | 0,1   | 0,859481811 | -0,24 | 0,775914311 | 0,02  | 0,990836784 | 0,1   | 0,908141892 | -0,16 | 0,860282167 |
| Lamtor1 | -0,1  | 0,882119027 | 0,07  | 0,944460866 | 0,16  | 0,855320495 | 0,09  | 0,875473756 | -0,03 | 0,977967676 |
| Lamtor2 | -0,03 | 0,963914207 | -0,06 | 0,945980281 | 0,18  | 0,862869965 | 0,17  | 0,735358224 | -0,22 | 0,763240477 |
| Lamtor3 | 0,19  | 0,768616672 | 0,17  | 0,832928559 | -0,1  | 0,906995362 | 0,1   | 0,868604435 | -0,04 | 0,970287867 |
| Lamtor4 | 0,17  | 0,792367608 | 0,1   | 0,892869412 | -0,53 | 0,231640032 | -0,02 | 0,970897388 | 0,07  | 0,943231038 |
| Lamtor5 | -0,13 | 0,758067417 | -0,1  | 0,815317911 | -0,12 | 0,899292348 | 0,33  | 0,41819556  | -0,04 | 0,966951657 |
| Lancl1  | 0,14  | 0,901227658 | -0,1  | 0,838368852 | 0,45  | 0,446493846 | -0,34 | 0,473229831 | 0,28  | 0,679110964 |
| Lancl2  | -0,53 | 0,337550116 | -0,58 | 0,43731683  | 0,32  | 0,722041343 | 0,03  | 0,972627967 | -0,39 | 0,527815148 |
| Lancl3  | 2,07  | 0,023509566 | 2,69  | 0,043236689 | -0,68 | 0,375756922 | -1,57 | 0,019134993 | -1,07 | 0,062213168 |
| Lao1    | 0,23  | 0,600313897 | 0,14  | 0,89034555  | 0,06  | 0,947034823 | 0,05  | 0,955655574 | -0,5  | 0,387681311 |
| Lap3    | 0,82  | 0,309185953 | 0,92  | 0,098105096 | -0,84 | 0,179552168 | 1,25  | 0,024008426 | 1,9   | 0,003719857 |
| Lapm4a  | 0,26  | 0,507799043 | 0,28  | 0,501438027 | -0,27 | 0,591520086 | -0,76 | 0,049150538 | 0,11  | 0,864166878 |
| Lapm4b  | 0,72  | 0,148685247 | 1,13  | 0,104971247 | -0,71 | 0,116395149 | -0,38 | 0,488293987 | 1,16  | 0,035232391 |
| Lapm5   | -0,55 | 0,660640764 | -0,24 | 0,731660685 | 0,49  | 0,828424248 | 1,21  | 0,139364198 | 0,56  | 0,662029815 |
| Large   | -0,27 | 0,484387088 | 0,4   | 0,484006822 | 0,71  | 0,440698893 | -0,15 | 0,820103742 | 0,09  | 0,925858284 |
| Larp1   | 0,05  | 0,932324918 | 0,1   | 0,836260311 | -0,28 | 0,705256612 | 0,53  | 0,110604297 | 0,44  | 0,406927898 |
| Larp1b  | -0,46 | 0,557053469 | -0,12 | 0,948500416 | 0,37  | 0,779114798 | 0,01  | 0,996900471 | 0,73  | 0,321751898 |
| Larp4   | -0,31 | 0,496123406 | -0,21 | 0,849013186 | 0,49  | 0,387573388 | 0,58  | 0,194616953 | 0,06  | 0,948935854 |
| Larp4b  | -0,5  | 0,421378808 | -0,3  | 0,594415097 | 0,06  | 0,948637233 | 0,78  | 0,080032206 | 0,34  | 0,51891273  |

|        |       |             |       |             |       |             |       |             |       |             |
|--------|-------|-------------|-------|-------------|-------|-------------|-------|-------------|-------|-------------|
| Larp6  | 0,07  | 0,927866076 | -0,41 | 0,568187167 | -0,2  | 0,832665595 | 0,7   | 0,418157488 | -0,01 | 0,995109577 |
| Larp7  | -0,22 | 0,799472935 | -0,36 | 0,47451344  | 0,45  | 0,387068715 | 0,13  | 0,885996165 | 0,5   | 0,553804597 |
| Lars   | -0,14 | 0,903817676 | 0,14  | 0,722369153 | -0,29 | 0,584463665 | 0,56  | 0,151396301 | 0,79  | 0,198832044 |
| Lars2  | -0,68 | 0,54401985  | 0,43  | 0,292535838 | 0,47  | 0,591404136 | -0,06 | 0,963999463 | -0,11 | 0,947757536 |
| Las1l  | -0,12 | 0,91083461  | -0,19 | 0,768164691 | -0,08 | 0,935451631 | -0,38 | 0,619079614 | -0,53 | 0,505021443 |
| Lasc1  | 0,26  | 0,632758883 | -0,09 | 0,921821409 | 0,07  | 0,916403684 | 0,21  | 0,611276029 | -0,1  | 0,893225952 |
| Lasp1  | -0,32 | 0,639984081 | -0,01 | 0,999210601 | -0,12 | 0,870263371 | 0,26  | 0,648473202 | -0,15 | 0,890396963 |
| Lat    | 0,42  | 0,705404186 | -0,36 | 0,832655657 | -0,76 | 0,50620307  | 0,55  | 0,390424873 | 0,46  | 0,6754671   |
| Lat2   | 0,08  | 0,926692467 | 0,05  | 0,958856577 | 0,2   | 0,835677021 | -0,02 | 0,983166423 | -0,31 | 0,760401775 |
| Lats1  | 0,18  | 0,792735264 | -0,06 | 0,936792848 | 0,54  | 0,386741083 | 0,13  | 0,733028982 | 0,03  | 0,977117612 |
| Lats2  | 0,21  | 0,827055517 | 0,29  | 0,606999442 | -0,23 | 0,791790984 | -0,14 | 0,896641144 | 0,28  | 0,78532501  |
| Lax1   | -0,63 | 0,59141369  | -0,89 | 0,408512216 | -0,51 | 0,579159818 | 0,41  | 0,715958649 | -0,52 | 0,6754671   |
| Layn   | -0,14 | 0,785400637 | 0,07  | 0,954307545 | -0,11 | 0,932986275 | 0,02  | 0,968682672 | 0,32  | 0,695556052 |
| Lbh    | -0,58 | 0,124734826 | -0,52 | 0,345535775 | 0,89  | 0,209534486 | 0,21  | 0,575798513 | -0,72 | 0,210816646 |
| Lbp    | -0,1  | 0,96263856  | -0,46 | 0,26375548  | 0,41  | 0,642400849 | -4,24 | 0,00201305  | -0,32 | 0,523279017 |
| Lbr    | -1,13 | 0,074890017 | -0,18 | 0,812677132 | -0,34 | 0,693619157 | 0,22  | 0,810583605 | 0,22  | 0,82840392  |
| Lbx1   | -0,28 | 0,622478997 | 0,39  | 0,647569143 | 0,25  | 0,660561609 | -0,24 | 0,635482645 | 0,17  | 0,819072786 |
| Lbx2   | 0,33  | 0,463862922 | 0,02  | 0,990272104 | 0,19  | 0,800516313 | -0,37 | 0,416003843 | -0,39 | 0,619080487 |
| Lca5   | -0,08 | 0,907523265 | 0,36  | 0,494161701 | 0,41  | 0,560191012 | -0,27 | 0,504352251 | -0,38 | 0,457844384 |
| Lca5l  | -0,52 | 0,340214072 | 0,3   | 0,538971484 | -0,15 | 0,780072407 | -0,31 | 0,598124161 | -0,06 | 0,967325392 |
| Lcat   | 0,47  | 0,600313897 | 0,58  | 0,494161701 | -0,7  | 0,404120029 | -0,08 | 0,94966838  | 0,67  | 0,514506628 |
| Lce1a1 | 0,23  | 0,632244183 | -0,01 | 0,98859071  | 0,11  | 0,845651772 | -0,08 | 0,894580364 | -0,14 | 0,852954345 |
| Lce1a2 | 0,08  | 0,903817676 | 0,08  | 0,892716986 | 0,34  | 0,527929204 | -0,05 | 0,911831177 | 0,02  | 0,983469081 |
| Lce1b  | 0,34  | 0,441176207 | -0,48 | 0,64119235  | -0,38 | 0,608702079 | 0,45  | 0,224620705 | 0,05  | 0,948935854 |
| Lce1c  | -0,11 | 0,879743728 | -0,19 | 0,665887221 | -0,08 | 0,898684568 | 0,02  | 0,962670023 | 0,2   | 0,799382016 |
| Lce1d  | 0     | 0,996998625 | -0,4  | 0,49252156  | 0,04  | 0,96043738  | 0,13  | 0,861140391 | -0,28 | 0,70740752  |
| Lce1e  | 0,31  | 0,690560567 | 0,14  | 0,897811179 | -0,15 | 0,823823322 | -0,23 | 0,754339703 | -0,16 | 0,881569218 |
| Lce1f  | -0,45 | 0,565823399 | 0,21  | 0,764299173 | 0,33  | 0,82162081  | -0,07 | 0,912858228 | -0,2  | 0,825272094 |
| Lce1g  | 0,13  | 0,856118781 | 0,1   | 0,857490594 | -0,13 | 0,816238828 | -0,15 | 0,706623607 | -0,13 | 0,830518207 |
| Lce1h  | -0,15 | 0,902361035 | -0,35 | 0,577638608 | 0,04  | 0,974836642 | 0,36  | 0,525195809 | 0,24  | 0,77050934  |
| Lce1i  | -0,13 | 0,84900712  | 0,02  | 0,989873399 | -0,3  | 0,611573953 | -0,07 | 0,909976349 | -0,02 | 0,982779069 |
| Lce1j  | 0,31  | 0,384022886 | 0,11  | 0,839789639 | -0,13 | 0,849178789 | 0,07  | 0,919306652 | 0,19  | 0,807620467 |
| Lce1k  | -0,03 | 0,963098689 | -0,12 | 0,852067992 | -0,27 | 0,540782039 | 0,09  | 0,80528948  | 0,08  | 0,933011676 |
| Lce1l  | 0,33  | 0,424550317 | -0,1  | 0,907909875 | -0,06 | 0,932706021 | 0,25  | 0,467700021 | 0,12  | 0,871200767 |
| Lce1m  | 0,3   | 0,566044466 | -0,37 | 0,845112339 | -0,05 | 0,976042637 | 0,33  | 0,70136857  | 0,18  | 0,93193727  |



|         |       |             |       |             |       |             |       |             |       |             |
|---------|-------|-------------|-------|-------------|-------|-------------|-------|-------------|-------|-------------|
| Lce3a   | 0,07  | 0,907748757 | -0,12 | 0,821940247 | -0,07 | 0,919754592 | 0,21  | 0,619079614 | 0,16  | 0,830086988 |
| Lce3b   | 0,26  | 0,68558206  | -0,19 | 0,777930951 | -0,08 | 0,921956183 | 0,12  | 0,780560728 | -0,09 | 0,91253262  |
| Lce3c   | 0,19  | 0,731577545 | 0,13  | 0,864989815 | 0,1   | 0,910060392 | 0     | 1           | 0,08  | 0,935732697 |
| Lce3d   | 0,02  | 0,988406746 | 0,21  | 0,808422093 | 0,04  | 0,976138805 | -0,05 | 0,940891309 | 0,1   | 0,935732697 |
| Lce3e   | -0,01 | 0,994989833 | 0,15  | 0,74245372  | 0,08  | 0,909963525 | -0,02 | 0,969369358 | 0,21  | 0,704344004 |
| Lce3f   | 0,05  | 0,939237777 | -0,02 | 0,980518468 | -0,02 | 0,990644839 | -0,06 | 0,899003207 | 0,2   | 0,780906047 |
| Lce6a   | 0,09  | 0,895870455 | 0     | 1           | 0,07  | 0,911634383 | 0     | 0,995856957 | -0,05 | 0,954292902 |
| Lck     | -0,01 | 0,993728727 | 0,07  | 0,934627513 | -0,45 | 0,522316865 | -0,16 | 0,825233917 | -0,04 | 0,978604922 |
| Lclat1  | -0,5  | 0,496008309 | -0,43 | 0,640836969 | 0,81  | 0,138770182 | -0,29 | 0,374216395 | -0,54 | 0,245859871 |
| Lcmt1   | 0     | 0,998307191 | 0,13  | 0,900801202 | -0,04 | 0,972847253 | 0,01  | 0,995662115 | -0,54 | 0,470126079 |
| Lcmt2   | -0,3  | 0,447068257 | -0,4  | 0,664787536 | 0,36  | 0,443341184 | -0,12 | 0,868680052 | -0,22 | 0,824727805 |
| Lcn10   | 0,27  | 0,697053625 | 0,35  | 0,640558743 | 0,25  | 0,708876309 | -0,01 | 0,994512187 | 0,04  | 0,979338129 |
| Lcn11   | 0,13  | 0,764432229 | 0,21  | 0,828498885 | 0,57  | 0,293036801 | -0,29 | 0,431967511 | 0,57  | 0,363327544 |
| Lcn12   | 0,13  | 0,875890831 | 0,3   | 0,78118896  | 0,35  | 0,60848236  | -0,2  | 0,722307071 | 0,66  | 0,219210988 |
| Lcn2    | 0,29  | 0,797266879 | -0,25 | 0,873596394 | 0,14  | 0,934767777 | -1,81 | 0,027401066 | -0,14 | 0,829729297 |
| Lcn3    | -0,14 | 0,7830424   | 0,18  | 0,864989815 | 0,09  | 0,909233941 | -0,14 | 0,768036061 | 0,03  | 0,97390153  |
| Lcn4    | 0,22  | 0,721378796 | -0,15 | 0,813804589 | -0,1  | 0,897127882 | -0,23 | 0,677875835 | -0,36 | 0,583882299 |
| Lcn5    | 0,1   | 0,944652244 | -0,04 | 0,971801869 | 0,01  | 0,995985283 | -0,03 | 0,964803155 | -0,1  | 0,939607682 |
| Lcn6    | 0,32  | 0,599095051 | 0,11  | 0,806456132 | -0,11 | 0,880645887 | -0,02 | 0,975655831 | 0,5   | 0,334365666 |
| Lcn8    | 0,19  | 0,858338463 | -0,21 | 0,776548278 | 0,29  | 0,550662565 | 0,3   | 0,330898178 | -0,06 | 0,939948423 |
| Lcn9    | 0,23  | 0,625573018 | -0,34 | 0,585330659 | -0,04 | 0,963221639 | 0,06  | 0,924492971 | -0,36 | 0,587915673 |
| Lcor    | -0,1  | 0,905118244 | 0,46  | 0,302028989 | -0,22 | 0,674253263 | 0,03  | 0,977389088 | 0,46  | 0,523096376 |
| Lcorl   | 0,2   | 0,860773832 | -0,12 | 0,787322926 | 0,14  | 0,906045706 | 0,75  | 0,086452922 | 0,4   | 0,448271347 |
| Lcp1    | -0,85 | 0,104793898 | -0,41 | 0,314703215 | 0,98  | 0,209534486 | 2,73  | 0,003561179 | -0,33 | 0,716229308 |
| Lcp2    | 0,11  | 0,856900875 | 0,46  | 0,305866517 | -0,03 | 0,979744938 | 3,65  | 0,032346574 | -0,39 | 0,837443824 |
| Lct     | 0,07  | 0,94326605  | 0,27  | 0,541570411 | 0,11  | 0,895520077 | -0,23 | 0,470031365 | -0,48 | 0,286600165 |
| Lctl    | 0,33  | 0,421957622 | 0,21  | 0,748874675 | 0,22  | 0,772397144 | 0,15  | 0,647008385 | 0,26  | 0,811321326 |
| Ldah    | -0,31 | 0,66331039  | 0,01  | 0,993789602 | 0,32  | 0,911921787 | -0,52 | 0,512935647 | -0,55 | 0,589933151 |
| Ldb1    | -0,3  | 0,701086418 | -0,01 | 0,996259587 | 0,61  | 0,460914763 | -0,28 | 0,394549983 | -0,35 | 0,563077271 |
| Ldb2    | -0,08 | 0,862908528 | -0,07 | 0,894022563 | -0,23 | 0,640464842 | -0,09 | 0,847763765 | -0,13 | 0,865866242 |
| Ldb3    | 0,17  | 0,740529913 | -0,28 | 0,690317074 | -0,07 | 0,94178334  | 0,26  | 0,540689057 | -0,36 | 0,65779331  |
| Ldha    | -0,12 | 0,811009431 | -0,22 | 0,65931908  | 0,4   | 0,490489841 | 0,47  | 0,169299417 | -0,38 | 0,574017037 |
| Ldhal6b | 0,08  | 0,902351728 | 0     | 0,999546856 | -0,09 | 0,897127882 | 0,26  | 0,595625902 | 0,36  | 0,680015121 |
| Ldhb    | -0,31 | 0,821712184 | -0,47 | 0,807949539 | 1,03  | 0,064246958 | -1,62 | 0,020805477 | -0,08 | 0,939484651 |
| Ldhc    | -0,18 | 0,796629483 | 0,09  | 0,90164068  | 0,23  | 0,806102885 | 0,24  | 0,507570518 | 0,2   | 0,810276195 |

|          |       |             |       |             |       |             |       |             |       |             |
|----------|-------|-------------|-------|-------------|-------|-------------|-------|-------------|-------|-------------|
| Ldhd     | -0,2  | 0,927072151 | -0,21 | 0,864989815 | 0,18  | 0,873457545 | 0,12  | 0,849242587 | 0,6   | 0,410369443 |
| Ldlr     | -1,02 | 0,062721706 | -0,41 | 0,693906911 | 0,66  | 0,252464368 | 0,62  | 0,44842713  | 0,12  | 0,936240111 |
| Ldlrad1  | 0,19  | 0,799472935 | -0,09 | 0,888060209 | -0,08 | 0,949858985 | 0,16  | 0,818318954 | 0,04  | 0,978604922 |
| Ldlrad2  | 0,07  | 0,936871609 | 0,41  | 0,608466494 | 0,12  | 0,892858294 | -0,04 | 0,961123444 | 0,21  | 0,765809384 |
| Ldlrad3  | -0,47 | 0,71350318  | 0,62  | 0,362584617 | -0,46 | 0,390139878 | 0,38  | 0,388065491 | -0,25 | 0,750504485 |
| Ldlrad4  | -0,36 | 0,525997338 | -0,01 | 0,999210601 | 0,56  | 0,483168148 | 0,04  | 0,922136844 | -0,71 | 0,110921414 |
| Ldlrap1  | -0,56 | 0,25379976  | -0,41 | 0,485715291 | 0,5   | 0,560376292 | 1,41  | 0,027423594 | 0     | 0,997876986 |
| Ldoc1    | 0,15  | 0,855421712 | -0,21 | 0,851208256 | 0,53  | 0,271298686 | 0,2   | 0,714687942 | -0,12 | 0,879075155 |
| Ldoc1l   | -0,04 | 0,964272364 | 0,36  | 0,384803204 | -0,2  | 0,807402106 | -0,2  | 0,609023716 | -0,23 | 0,810276195 |
| Leap2    | -0,33 | 0,412575527 | -0,09 | 0,88928164  | 0,07  | 0,94162972  | -0,45 | 0,639359737 | -0,14 | 0,932268703 |
| Lect1    | 0,26  | 0,724976228 | -0,16 | 0,842793123 | -0,01 | 0,988661889 | -0,97 | 0,580513589 | -0,88 | 0,587735967 |
| Lect2    | -0,75 | 0,54401985  | -0,89 | 0,239894522 | -0,16 | 0,895520077 | 1,01  | 0,036676931 | 0,23  | 0,765342998 |
| Lef1     | 0,21  | 0,759147139 | 0,2   | 0,68442935  | 0,05  | 0,956894731 | -4,25 | 0,01795151  | -0,8  | 0,597080822 |
| Lefty1   | -0,31 | 0,662416763 | 0,67  | 0,467853942 | 0,02  | 0,990836784 | -0,46 | 0,69938772  | -0,52 | 0,639451374 |
| Lefty2   | 0,86  | 0,346575965 | -0,37 | 0,51915071  | -0,09 | 0,906678445 | -0,11 | 0,836277934 | -0,29 | 0,680015121 |
| Lekr1    | 0,15  | 0,727670784 | -0,25 | 0,756369219 | -0,33 | 0,559786242 | 0,43  | 0,492501823 | 0,16  | 0,909177642 |
| Lelp1    | -0,12 | 0,847618632 | -0,01 | 0,999395995 | -0,07 | 0,921956183 | -0,02 | 0,968037302 | -0,2  | 0,78512653  |
| Lemd1    | 0,16  | 0,757239936 | -0,08 | 0,900801202 | 0,54  | 0,340829591 | 0,16  | 0,854243228 | -0,1  | 0,944842342 |
| Lemd2    | -0,28 | 0,683531628 | 0,03  | 0,954948291 | 0,1   | 0,901032944 | 0,28  | 0,696607541 | -0,7  | 0,348392619 |
| Lemd3    | 0,2   | 0,832645049 | 0,13  | 0,876503933 | -0,04 | 0,959376967 | 0,01  | 0,995530123 | 0,58  | 0,291178873 |
| Leng1    | -0,31 | 0,533263536 | -0,34 | 0,424068004 | -0,01 | 0,993379272 | 0,36  | 0,676565379 | 0,01  | 0,9939542   |
| Leng8    | 0,38  | 0,618093813 | 0,17  | 0,88741189  | -0,21 | 0,856046789 | -0,29 | 0,736251815 | -0,37 | 0,694233384 |
| Leng9    | 0,29  | 0,64776317  | 0,02  | 0,974580396 | 0,17  | 0,771712471 | -0,2  | 0,783961371 | -0,32 | 0,787325394 |
| Leo1     | -0,69 | 0,183679881 | 0,12  | 0,86198859  | 0,28  | 0,775290551 | 1,3   | 0,018183641 | 0,61  | 0,406074518 |
| Lep      | 0,14  | 0,829198831 | 0,23  | 0,767178812 | -0,03 | 0,974887915 | -0,24 | 0,548775366 | -0,55 | 0,471919432 |
| Lepr     | 0,8   | 0,22556036  | -0,62 | 0,602956592 | -1,05 | 0,050909179 | -1,63 | 0,034171201 | -1,34 | 0,013202628 |
| Leprot   | -0,05 | 0,927686801 | -0,19 | 0,758932518 | 0,02  | 0,975866042 | -0,2  | 0,601996277 | -0,49 | 0,272986942 |
| Leprotl1 | 0,33  | 0,407600798 | -0,18 | 0,750601272 | -0,14 | 0,896181325 | 0,68  | 0,296322125 | -0,06 | 0,959263411 |
| Letm1    | -0,74 | 0,229796994 | -0,44 | 0,436759792 | -0,05 | 0,960492934 | -0,11 | 0,778212842 | -0,26 | 0,731211225 |
| Letm2    | 0,61  | 0,279889648 | 0,29  | 0,602956592 | -0,2  | 0,868609956 | -1,25 | 0,12170775  | -0,44 | 0,62243023  |
| Letmd1   | 0,03  | 0,975506993 | 0,12  | 0,884434898 | -0,15 | 0,809137779 | -0,15 | 0,67498969  | -0,3  | 0,685316571 |
| Lexm     | -0,31 | 0,775640696 | -0,09 | 0,90164068  | -0,41 | 0,647988621 | 0,2   | 0,786750698 | 0,01  | 0,992980215 |
| Lfng     | -0,82 | 0,127439636 | -0,69 | 0,500563679 | -0,05 | 0,944078985 | -1,57 | 0,047169905 | -0,34 | 0,563077271 |
| Lgals1   | -0,04 | 0,956705598 | 0,04  | 0,946599376 | 1,08  | 0,042376856 | 2,59  | 0,004853653 | -0,23 | 0,797293554 |
| Lgals12  | 0,11  | 0,846313357 | 0,3   | 0,514880019 | -0,13 | 0,8290371   | -0,25 | 0,568286799 | -0,21 | 0,773421155 |

|          |       |             |       |             |       |             |       |             |       |             |
|----------|-------|-------------|-------|-------------|-------|-------------|-------|-------------|-------|-------------|
| Lgals2   | -0,4  | 0,44173649  | -0,43 | 0,750378621 | -0,12 | 0,928438649 | 0,45  | 0,576859946 | 0,13  | 0,893117638 |
| Lgals3   | 0,76  | 0,380842862 | 0,36  | 0,690317074 | 0,83  | 0,110812391 | 0,54  | 0,332822631 | -0,51 | 0,427936864 |
| Lgals3bp | 0,46  | 0,505077442 | 0,35  | 0,367968212 | -0,53 | 0,329525512 | 0,24  | 0,49823644  | 0,43  | 0,354557431 |
| Lgals4   | 0,44  | 0,634129153 | 0,39  | 0,568187167 | -0,42 | 0,61190379  | -0,78 | 0,133098891 | -0,2  | 0,863496792 |
| Lgals7   | -0,23 | 0,721378796 | 0,11  | 0,838730743 | 0     | 0,997268369 | 0     | 0,999809258 | 0,22  | 0,760348904 |
| Lgals8   | 0,07  | 0,905414735 | 0,29  | 0,532316439 | -0,01 | 0,996397104 | 0,05  | 0,905108819 | 0,34  | 0,479492173 |
| Lgals9   | 0,36  | 0,371554727 | 0,33  | 0,430081562 | -0,46 | 0,308522148 | 0,54  | 0,120895967 | 0,57  | 0,202369779 |
| Lgi1     | -0,3  | 0,655409333 | 0,15  | 0,872187376 | 0,11  | 0,900135868 | 0,53  | 0,29551196  | 0,35  | 0,583434544 |
| Lgi2     | -0,25 | 0,698643104 | -0,26 | 0,526459535 | 0,37  | 0,462643491 | -0,21 | 0,607069306 | -0,34 | 0,600332767 |
| Lgi3     | -0,14 | 0,841685426 | -0,02 | 0,994137877 | 0,01  | 0,993379272 | -0,13 | 0,87811903  | -0,13 | 0,912890826 |
| Lgi4     | -0,58 | 0,251014805 | -0,2  | 0,839789639 | -0,07 | 0,929155794 | 0,09  | 0,900529161 | -0,35 | 0,626793555 |
| Lgmn     | 0,84  | 0,060731662 | 0,31  | 0,425798637 | -0,5  | 0,251575717 | 2,25  | 0,006048812 | -0,84 | 0,212051906 |
| Lgr4     | 0,06  | 0,957427783 | 0,07  | 0,965599736 | 0,87  | 0,224363065 | -1,02 | 0,547396551 | 0,07  | 0,980516734 |
| Lgr5     | 0,11  | 0,904633081 | 0,09  | 0,92798337  | -0,06 | 0,956894731 | -3,59 | 0,017315749 | -0,36 | 0,825564898 |
| Lgr6     | 0,27  | 0,683267007 | -0,16 | 0,729741948 | -0,08 | 0,897932497 | -0,21 | 0,58398994  | -0,08 | 0,912443565 |
| Lgsn     | 0,25  | 0,677390848 | -0,05 | 0,953261852 | 0,03  | 0,985326269 | 0,03  | 0,967890382 | 0,17  | 0,794001669 |
| Lhb      | 0,34  | 0,487571132 | 0,05  | 0,955390807 | -0,02 | 0,991568687 | 0,07  | 0,90213506  | 0,05  | 0,960974478 |
| Lhcgr    | 0     | 0,997842309 | 0,17  | 0,77110111  | -0,22 | 0,69871815  | 0,15  | 0,79260405  | 0,38  | 0,611234576 |
| Lhfp     | -0,31 | 0,438318142 | 0,58  | 0,625875078 | 0,47  | 0,584949083 | -0,33 | 0,387505063 | -0,43 | 0,625087577 |
| Lhfpl1   | -0,28 | 0,670538842 | 0,3   | 0,755498335 | 0,17  | 0,833276083 | -0,1  | 0,924110762 | 0,36  | 0,656101249 |
| Lhfpl2   | -1,51 | 0,059686542 | -1,1  | 0,218856242 | 0,17  | 0,917981605 | 1,04  | 0,03472581  | -0,79 | 0,339264617 |
| Lhfpl3   | 0,58  | 0,357506461 | 0,69  | 0,172096497 | 0,11  | 0,905770716 | -0,85 | 0,332865107 | -0,66 | 0,333084281 |
| Lhfpl4   | 0,13  | 0,840882072 | -0,14 | 0,842663656 | -0,19 | 0,733423502 | 0,01  | 0,995545056 | -0,14 | 0,877207052 |
| Lhfpl5   | -0,29 | 0,673516656 | -0,25 | 0,790958831 | 0,14  | 0,830336321 | 0,07  | 0,90855131  | 0,12  | 0,883664248 |
| Lhpp     | -0,08 | 0,932531737 | -0,28 | 0,806456132 | 0,68  | 0,207265232 | 0,42  | 0,6282575   | -0,55 | 0,462320724 |
| Lhx1     | 0,36  | 0,708127461 | 0,95  | 0,337068338 | -0,18 | 0,817106175 | -0,54 | 0,366832276 | -0,06 | 0,955836352 |
| Lhx1os   | -0,44 | 0,401159049 | 0,1   | 0,925981858 | 0,11  | 0,862480223 | -0,03 | 0,967866794 | 0,52  | 0,331553232 |
| Lhx2     | 0,79  | 0,343457563 | -0,16 | 0,857062139 | -0,01 | 0,997268369 | 0,29  | 0,660110505 | 0,39  | 0,695702232 |
| Lhx3     | 0,23  | 0,78476082  | 0,31  | 0,708684603 | -0,37 | 0,433481425 | -0,62 | 0,139144003 | -0,17 | 0,826235521 |
| Lhx4     | 0,18  | 0,740529913 | -0,02 | 0,98230594  | 0,01  | 0,997220401 | 0,18  | 0,766343388 | -0,17 | 0,848679763 |
| Lhx5     | 0,38  | 0,518267881 | 0,02  | 0,994944319 | -0,14 | 0,865361912 | 0,08  | 0,87407074  | 0,37  | 0,680015121 |
| Lhx6     | -0,23 | 0,782369077 | 0,03  | 0,958621018 | -0,64 | 0,424953258 | 1,88  | 0,00517713  | -0,33 | 0,569309426 |
| Lhx8     | 0,34  | 0,535013574 | 0,39  | 0,658609814 | -0,03 | 0,983189886 | -0,04 | 0,970247298 | 0,32  | 0,701728076 |
| Lhx9     | -0,06 | 0,955200574 | -0,17 | 0,785128233 | 0,11  | 0,897248623 | 0,24  | 0,477988362 | 0,37  | 0,474682362 |
| Lias     | -0,03 | 0,97300035  | -0,36 | 0,508065278 | 0,01  | 0,9954711   | -0,25 | 0,679144736 | -0,54 | 0,497822977 |

|         |       |             |       |             |       |             |       |             |       |             |
|---------|-------|-------------|-------|-------------|-------|-------------|-------|-------------|-------|-------------|
| Lif     | 0,21  | 0,820785667 | 0,02  | 0,981411052 | -0,12 | 0,909371204 | 0     | 1           | 0,04  | 0,980306863 |
| Lifr    | 1,21  | 0,031050265 | 1,9   | 0,036338833 | -1,05 | 0,298956409 | -3,11 | 0,007919254 | 0,11  | 0,920355527 |
| Lig1    | -1,27 | 0,087910462 | -1,19 | 0,277253387 | 0,82  | 0,096957153 | 0,73  | 0,511016709 | -0,1  | 0,949751787 |
| Lig3    | -0,53 | 0,256830239 | 0,11  | 0,828219939 | 1     | 0,09059546  | 0,43  | 0,319122891 | -0,43 | 0,536952317 |
| Lig4    | -0,57 | 0,493929    | 1,02  | 0,322806958 | 0,16  | 0,937099337 | -1,06 | 0,037243763 | 0,41  | 0,479585604 |
| Lilr4b  | 0,73  | 0,577264455 | 1,08  | 0,296331627 | -1,35 | 0,557268968 | -1,26 | 0,603439118 | -1,55 | 0,497529731 |
| Lilra5  | 0,32  | 0,764189777 | 0,09  | 0,948314657 | 0,18  | 0,802534871 | 0,02  | 0,981706816 | -0,33 | 0,68987325  |
| Lilrb4a | -1,02 | 0,461113298 | 0,13  | 0,938711163 | -0,8  | 0,673900313 | 0,92  | 0,18074023  | 0,57  | 0,642726581 |
| Lim2    | -0,35 | 0,665625405 | 0,14  | 0,869515524 | -0,36 | 0,62544037  | -0,01 | 0,988205241 | 0,37  | 0,578675445 |
| Lima1   | -0,38 | 0,627312744 | 0,04  | 0,937424389 | 0,05  | 0,958029325 | -0,12 | 0,835214439 | 0,01  | 0,993413582 |
| Limch1  | -1,38 | 0,17366966  | -1,12 | 0,195316116 | 0,19  | 0,772782651 | -1,89 | 0,024901832 | -1,2  | 0,060191534 |
| Limd1   | 0,16  | 0,783200207 | 0,34  | 0,51915071  | 0,51  | 0,486104811 | 0,67  | 0,283608652 | -0,45 | 0,669149621 |
| Limd2   | 0,03  | 0,962254712 | -0,14 | 0,877770697 | -0,17 | 0,888956864 | 0,67  | 0,221481521 | 0,85  | 0,114478518 |
| Lime1   | 0,09  | 0,906075104 | -0,12 | 0,828219939 | -0,04 | 0,977827235 | -0,86 | 0,036676931 | -0,1  | 0,907634098 |
| Limk1   | -0,86 | 0,128310381 | 0,11  | 0,909079807 | 0,67  | 0,512312279 | -1,83 | 0,01968311  | -0,68 | 0,212753714 |
| Limk2   | -0,72 | 0,172698611 | -0,06 | 0,941662534 | 0,18  | 0,785040228 | -0,07 | 0,856534916 | -0,48 | 0,305995061 |
| Lims1   | -0,11 | 0,834672627 | 0,29  | 0,508633526 | -0,26 | 0,611144549 | 1,47  | 0,068331955 | 0,57  | 0,470021545 |
| Lims2   | 0,02  | 0,986829217 | -0,23 | 0,69017177  | 0     | 0,997394645 | -2,87 | 0,003561179 | -0,95 | 0,041716332 |
| Lin28a  | -0,05 | 0,963914207 | 0,27  | 0,731912687 | -0,31 | 0,800107725 | 0,09  | 0,86294121  | -0,26 | 0,626176831 |
| Lin28b  | 0,01  | 0,990615139 | -0,09 | 0,936837377 | 0,06  | 0,939991258 | 0,37  | 0,420495959 | -0,45 | 0,419557334 |
| Lin37   | 0,07  | 0,94727537  | 0,4   | 0,319666469 | 0,23  | 0,773365699 | -0,43 | 0,332407294 | 0,16  | 0,828774079 |
| Lin52   | 0,33  | 0,560461791 | -0,17 | 0,906234611 | 0,04  | 0,984119559 | -1,02 | 0,204370449 | 0,03  | 0,99004065  |
| Lin54   | -0,4  | 0,662416763 | -0,51 | 0,35804906  | -0,18 | 0,885680687 | -0,02 | 0,978782666 | -0,65 | 0,268295085 |
| Lin7a   | -0,01 | 0,99572241  | -0,44 | 0,641052915 | -0,36 | 0,661089127 | 0,38  | 0,563779179 | -0,02 | 0,986263427 |
| Lin7b   | 0,12  | 0,915640305 | -0,11 | 0,935984823 | -0,15 | 0,872313115 | 0,3   | 0,771110373 | 0,26  | 0,810595588 |
| Lin7c   | -0,32 | 0,509815996 | 0,23  | 0,707455401 | 1,07  | 0,180608933 | -0,24 | 0,581091423 | -0,09 | 0,910083563 |
| Lin9    | -0,31 | 0,685826767 | -0,13 | 0,904361564 | 1,16  | 0,110060417 | 0,9   | 0,185613251 | 0,3   | 0,824164005 |
| Lingo1  | -0,3  | 0,705404186 | -0,28 | 0,599471467 | 0,44  | 0,579159818 | -0,04 | 0,954807708 | -0,65 | 0,265523913 |
| Lingo2  | -0,24 | 0,716234912 | -0,18 | 0,841184864 | 0,18  | 0,720069267 | 0,24  | 0,613098505 | 0,76  | 0,12125802  |
| Lingo3  | -0,09 | 0,853841106 | -0,19 | 0,764437391 | 0,16  | 0,838289412 | -0,09 | 0,818711104 | -0,02 | 0,982175252 |
| Lingo4  | 0,37  | 0,477506027 | -0,13 | 0,847821325 | 0,05  | 0,944839101 | -0,13 | 0,810971133 | -0,01 | 0,989431639 |
| Lins1   | -1,03 | 0,189644465 | 0,05  | 0,966717367 | -0,24 | 0,717856288 | 0,42  | 0,556095986 | 0,06  | 0,954298589 |
| Lipa    | -0,27 | 0,56461489  | -0,16 | 0,706346725 | 0,07  | 0,948637233 | 0,55  | 0,248052767 | -0,56 | 0,299755485 |
| Lipc    | 0,38  | 0,76050225  | 0,58  | 0,4427505   | 0,16  | 0,868609956 | 0,67  | 0,096718161 | 0,23  | 0,810276195 |
| Lipe    | -0,18 | 0,840621481 | 0,28  | 0,494161701 | -0,39 | 0,516254562 | -1,12 | 0,030723399 | 0,12  | 0,885777129 |

|           |       |             |       |             |       |             |       |             |       |             |
|-----------|-------|-------------|-------|-------------|-------|-------------|-------|-------------|-------|-------------|
| Lipf      | 0,01  | 0,98297164  | -0,27 | 0,613429827 | -0,08 | 0,90672161  | 0,02  | 0,983166423 | -0,15 | 0,830813323 |
| Lipg      | -0,84 | 0,494787323 | -0,18 | 0,794404033 | 1,03  | 0,19907753  | -0,05 | 0,931250259 | -0,8  | 0,455836363 |
| Liph      | 0,15  | 0,815649066 | -0,26 | 0,694017753 | 0,17  | 0,83076117  | 0,25  | 0,454004589 | 0,1   | 0,910301996 |
| Lipi      | -0,17 | 0,766575514 | 0,49  | 0,424175253 | -0,62 | 0,402220741 | -0,7  | 0,086584793 | -0,48 | 0,416349602 |
| Lipk      | 0,13  | 0,832696131 | 0,24  | 0,826870861 | -0,22 | 0,670995836 | -0,22 | 0,639337609 | 0,12  | 0,868602248 |
| Lipm      | -0,07 | 0,949848787 | 0,1   | 0,863359785 | 0,14  | 0,882540073 | 0,45  | 0,305366617 | 0,49  | 0,327302459 |
| Lipn      | 0,23  | 0,721797378 | 0,3   | 0,620803951 | -0,23 | 0,661747229 | -0,24 | 0,455648965 | 0,27  | 0,654506698 |
| Lipo1     | 1,04  | 0,07747443  | 0,59  | 0,188301476 | -0,08 | 0,964695682 | 0,17  | 0,636309622 | 0,75  | 0,08752752  |
| Lipo4     | 0,01  | 0,992533909 | 0,28  | 0,703291096 | -0,33 | 0,712697139 | -0,07 | 0,937628327 | -0,07 | 0,947437555 |
| Lipt1     | 0,28  | 0,698143553 | -0,12 | 0,927496936 | 0,36  | 0,68072441  | -0,62 | 0,191338088 | -0,1  | 0,904636459 |
| Lipt2     | -0,7  | 0,164853385 | -0,74 | 0,143690114 | 1,28  | 0,098829418 | 0,98  | 0,084777701 | -0,23 | 0,84701421  |
| Litaf     | 0,29  | 0,469692532 | 0,19  | 0,694422914 | -0,15 | 0,836625711 | 0,65  | 0,10714557  | 0,35  | 0,521620499 |
| Lix1      | 0,3   | 0,42935185  | 0,12  | 0,89205859  | -0,12 | 0,905632058 | -0,03 | 0,963392781 | -0,02 | 0,983613958 |
| Lix1l     | 0,1   | 0,867243066 | 0,14  | 0,838450577 | 0,3   | 0,661089127 | 0,56  | 0,211730122 | 0,52  | 0,320588885 |
| Lkaaeear1 | -0,24 | 0,678857468 | -0,03 | 0,980518468 | -0,12 | 0,856046789 | 0,29  | 0,668263661 | 0,01  | 0,994774512 |
| Llgl1     | -0,46 | 0,38528369  | -0,5  | 0,441995301 | 0,29  | 0,528255736 | 0,52  | 0,35511395  | -0,03 | 0,979643119 |
| Llgl2     | -0,51 | 0,450852052 | 0,25  | 0,852453028 | 0,4   | 0,477206304 | -0,73 | 0,29397318  | -0,17 | 0,876747929 |
| Llph      | -0,05 | 0,958535933 | 0,05  | 0,956504634 | 0,15  | 0,805542835 | -0,18 | 0,777249669 | 0,27  | 0,78114994  |
| Lman1     | -0,07 | 0,882500171 | -0,28 | 0,6238666   | 0,48  | 0,324803921 | 0,36  | 0,395497103 | -0,05 | 0,949140184 |
| Lman1l    | -0,03 | 0,967270241 | -0,16 | 0,858860016 | 0,05  | 0,954229024 | 0,21  | 0,71158821  | -0,01 | 0,991437885 |
| Lman2     | 0,12  | 0,832947001 | 0,01  | 0,994137877 | 0,36  | 0,38720215  | 0,16  | 0,78493052  | -0,53 | 0,439301508 |
| Lman2l    | -0,11 | 0,905474992 | 0,34  | 0,450214577 | -0,19 | 0,862441091 | 0,31  | 0,837974367 | 0,34  | 0,848445474 |
| Lmbr1     | 0,16  | 0,918126982 | -0,38 | 0,666450149 | 0,32  | 0,736445534 | -0,32 | 0,776452453 | -0,24 | 0,897045103 |
| Lmbr1l    | 0,14  | 0,810501608 | 0,3   | 0,505089058 | -0,2  | 0,80210446  | -0,36 | 0,332781724 | -0,14 | 0,865272374 |
| Lmbrd1    | 0,1   | 0,852363306 | 0,06  | 0,956049982 | -0,46 | 0,667957746 | -0,71 | 0,183972008 | 0,57  | 0,272217006 |
| Lmbrd2    | 0,31  | 0,707480624 | 0,38  | 0,807674009 | 0,86  | 0,574125052 | -0,48 | 0,60552563  | 0,23  | 0,707081609 |
| Lmcd1     | -0,87 | 0,180168214 | -0,88 | 0,389273523 | 0,27  | 0,829285065 | -3,26 | 0,004876398 | -1,07 | 0,155105536 |
| Lmf1      | 0,23  | 0,699989503 | -0,32 | 0,612941322 | 0,41  | 0,500849254 | 0,18  | 0,769516738 | -0,36 | 0,570352952 |
| Lmf2      | -0,32 | 0,487571132 | -0,38 | 0,651587568 | 0,12  | 0,910002544 | 0,13  | 0,857672322 | -0,55 | 0,479727901 |
| Lmln      | -0,31 | 0,6226265   | 0,03  | 0,965147491 | 0,71  | 0,184610151 | -0,12 | 0,772978467 | -0,98 | 0,047041449 |
| Lmna      | 0,11  | 0,808379727 | -0,3  | 0,493580894 | 0,18  | 0,712697139 | 0,58  | 0,154656308 | -0,04 | 0,965615196 |
| Lmnb1     | -0,79 | 0,244269955 | -1    | 0,082537034 | 0,85  | 0,095178556 | 1,66  | 0,057868203 | -0,05 | 0,975200543 |
| Lmnb2     | -0,38 | 0,610509826 | -0,73 | 0,396204581 | 0,01  | 0,993379272 | 0,13  | 0,857884225 | -0,49 | 0,536639649 |
| Lmntd2    | 0,13  | 0,909325137 | -0,24 | 0,891749049 | 0,03  | 0,981207238 | -0,17 | 0,85293288  | -0,27 | 0,785640104 |
| Lmo1      | -0,91 | 0,112406433 | -0,05 | 0,964875723 | -0,31 | 0,714376082 | 1,14  | 0,094905894 | -0,63 | 0,474007701 |

|              |       |             |       |             |       |             |       |             |       |             |
|--------------|-------|-------------|-------|-------------|-------|-------------|-------|-------------|-------|-------------|
| Lmo2         | -0,22 | 0,707480624 | 0,03  | 0,957845968 | 0,03  | 0,988734862 | -0,62 | 0,254212331 | -0,08 | 0,939298645 |
| Lmo3         | 0,44  | 0,429246857 | -0,36 | 0,640836969 | 0,33  | 0,548288344 | 0,28  | 0,661579252 | 0,15  | 0,853041033 |
| Lmo4         | 0,47  | 0,526237328 | 0,53  | 0,611052267 | -0,66 | 0,209534486 | -0,39 | 0,353547948 | 0,21  | 0,74624632  |
| Lmo7         | 0,04  | 0,94815841  | 0,11  | 0,907217169 | -0,24 | 0,838592669 | 1,84  | 0,012089604 | -0,04 | 0,979456872 |
| Lmod1        | 0,06  | 0,948291116 | -0,2  | 0,837035571 | 0,43  | 0,42953294  | -0,56 | 0,441582774 | 0,09  | 0,944318268 |
| Lmod2        | 0,06  | 0,923180948 | -0,11 | 0,803071242 | -0,42 | 0,530264141 | 0,11  | 0,745159546 | -0,12 | 0,890833196 |
| Lmod3        | 0,36  | 0,653488514 | 0,22  | 0,654621987 | -0,08 | 0,938456865 | -0,14 | 0,805340608 | -0,01 | 0,989016067 |
| Lmtk2        | -0,15 | 0,721134093 | 0,29  | 0,72665096  | -0,3  | 0,66611828  | 0,03  | 0,973448386 | 0,53  | 0,343706058 |
| Lmtk3        | -0,16 | 0,750334502 | -0,06 | 0,972706967 | -0,16 | 0,769616524 | -1,06 | 0,106060853 | -0,55 | 0,354557431 |
| Lmx1a        | 0,23  | 0,656034838 | -0,1  | 0,889215021 | -0,08 | 0,939684708 | 0,22  | 0,835227286 | 0,04  | 0,979392852 |
| Lmx1b        | 0,02  | 0,987965359 | 0,2   | 0,842663656 | -0,06 | 0,939533598 | -0,05 | 0,946184892 | -0,04 | 0,973428839 |
| Lncbate1     | 0,04  | 0,946792769 | 0,01  | 0,994486533 | -0,05 | 0,941420786 | 0,07  | 0,891790388 | 0,2   | 0,780916488 |
| Lncenc1      | 0,17  | 0,645258762 | -0,12 | 0,808222835 | -0,07 | 0,921956183 | 0,07  | 0,920640884 | 0,29  | 0,735052158 |
| Lncpint      | 0,79  | 0,24877804  | -0,29 | 0,705845461 | -0,57 | 0,470379063 | -1,87 | 0,010253995 | -0,11 | 0,917875779 |
| Lnp          | -0,84 | 0,406819287 | -1,09 | 0,503323618 | 0,85  | 0,307892663 | -0,35 | 0,726641891 | 0,1   | 0,949140184 |
| Lnp1         | 0,26  | 0,672109239 | -0,14 | 0,912535732 | -0,3  | 0,710925133 | 0,06  | 0,926704232 | 0,19  | 0,730330131 |
| Lnppep       | 0,03  | 0,974011242 | 0,1   | 0,859954464 | 0,32  | 0,665727181 | 0,05  | 0,959923279 | -0,07 | 0,960974478 |
| Lnx1         | 0,01  | 0,996219097 | -0,04 | 0,959209847 | -0,11 | 0,94940954  | -0,1  | 0,944769683 | -0,4  | 0,766252538 |
| Lnx2         | -0,18 | 0,737827604 | -0,12 | 0,785573503 | 0,23  | 0,736630059 | -0,36 | 0,460670396 | -0,64 | 0,224766258 |
| LOC100036530 | 0,33  | 0,566131631 | -0,2  | 0,839195196 | -0,23 | 0,617943722 | -0,05 | 0,939298189 | 0,29  | 0,708814033 |
| LOC100038738 | 0,09  | 0,856984761 | 0,14  | 0,778589117 | -0,01 | 0,993379272 | -0,06 | 0,912858228 | 0,2   | 0,736140152 |
| LOC100043315 | -0,05 | 0,925402274 | -0,27 | 0,653087457 | -0,02 | 0,982097988 | -0,15 | 0,782990724 | 0,13  | 0,859663155 |
| LOC100045026 | 0,03  | 0,957273909 | 0     | 1           | -0,23 | 0,689427998 | 0,02  | 0,967866794 | 0,13  | 0,859663155 |
| LOC100125594 | -0,35 | 0,36631183  | 0     | 1           | -0,2  | 0,777693267 | -0,1  | 0,822470491 | 0,23  | 0,818031414 |
| LOC100135765 | -0,61 | 0,418839638 | -0,21 | 0,896003756 | -0,51 | 0,55404888  | -0,06 | 0,938689944 | -0,87 | 0,410467631 |
| LOC100503048 | 0,31  | 0,464939452 | 0,05  | 0,912535732 | -0,22 | 0,678840444 | 0,01  | 0,980724248 | 0,08  | 0,912683275 |
| LOC100503212 | 0,11  | 0,901227658 | -0,15 | 0,77148563  | 0,33  | 0,544299103 | -0,06 | 0,938689944 | 0,43  | 0,602192799 |
| LOC100503338 | 1,45  | 0,074890017 | 1,4   | 0,099280413 | -0,59 | 0,61483831  | 0,01  | 0,997598211 | 0,62  | 0,576452248 |
| LOC100503496 | -0,31 | 0,465168175 | 0,04  | 0,9566353   | -0,32 | 0,572810613 | -0,14 | 0,701365109 | -0,11 | 0,923530475 |
| LOC100503594 | -0,03 | 0,966775766 | 0,05  | 0,935041212 | 0,02  | 0,978012085 | -0,07 | 0,850124516 | -0,09 | 0,904836805 |
| LOC100505025 | 0,07  | 0,892823025 | 0     | 1           | -0,31 | 0,657277431 | -0,12 | 0,767086207 | 0,18  | 0,792234713 |
| LOC100505199 | -0,02 | 0,982432452 | -0,1  | 0,842663656 | 0,06  | 0,946627221 | 0,12  | 0,740434535 | -0,02 | 0,980961333 |
| LOC100861615 | 1,1   | 0,050208882 | 0,85  | 0,109267475 | -1,36 | 0,032673349 | 1,66  | 0,014867842 | 0,22  | 0,74324214  |
| LOC100861738 | -0,18 | 0,758636946 | 0,08  | 0,883145635 | -0,09 | 0,921956183 | -0,12 | 0,823795118 | -0,16 | 0,858635197 |
| LOC100861749 | 0,15  | 0,848783415 | 0,2   | 0,827496723 | 0,04  | 0,983471086 | -0,15 | 0,751418588 | -0,36 | 0,814438115 |

|              |       |             |       |             |       |             |       |             |       |             |
|--------------|-------|-------------|-------|-------------|-------|-------------|-------|-------------|-------|-------------|
| LOC100861784 | 0,07  | 0,882500171 | 0,15  | 0,762657778 | 0,1   | 0,903918012 | 0,16  | 0,698362346 | -0,05 | 0,962820357 |
| LOC100862151 | -0,29 | 0,460231397 | -0,13 | 0,807463629 | 0,04  | 0,963221639 | 0,15  | 0,690709163 | -0,22 | 0,703496918 |
| LOC100862268 | 0,29  | 0,533055802 | 0,25  | 0,728434379 | -0,02 | 0,989491273 | 0,27  | 0,476284901 | 0,22  | 0,840036408 |
| LOC100862287 | 0,55  | 0,438932987 | 0,12  | 0,922703368 | -0,03 | 0,984778342 | 0,01  | 0,998889125 | 0,14  | 0,927536545 |
| LOC101055656 | 0,15  | 0,78682706  | -0,04 | 0,965860704 | 0,13  | 0,790112485 | -0,05 | 0,931392535 | -0,29 | 0,723883531 |
| LOC101055663 | -0,13 | 0,886725624 | -0,12 | 0,910203909 | 0,03  | 0,993379272 | -0,09 | 0,925056005 | 1,42  | 0,2047166   |
| LOC101055751 | 0,26  | 0,798689514 | 0,11  | 0,816132656 | -0,1  | 0,914709671 | 0,04  | 0,943864463 | 0,08  | 0,932846086 |
| LOC101056015 | 0,35  | 0,592500758 | 0,05  | 0,917256002 | 0,01  | 0,993231654 | 0     | 1           | -0,06 | 0,955910202 |
| LOC101056071 | 0,19  | 0,618050407 | 0,1   | 0,839673299 | 0,19  | 0,747827929 | -0,37 | 0,417679727 | -0,32 | 0,615772692 |
| LOC101056093 | -0,16 | 0,807701166 | -0,3  | 0,500907892 | -0,13 | 0,885599187 | -0,35 | 0,437001295 | -0,38 | 0,687240111 |
| LOC102631757 | 0,23  | 0,550631645 | -0,07 | 0,954343854 | -0,1  | 0,898382247 | -0,17 | 0,792997678 | -0,19 | 0,775753249 |
| LOC102631780 | -0,14 | 0,815219917 | 0,15  | 0,740618526 | -0,1  | 0,880706627 | -0,16 | 0,729392851 | -0,12 | 0,893117638 |
| LOC102631805 | -0,18 | 0,659378899 | 0,09  | 0,89034555  | 0,17  | 0,744387748 | 0,14  | 0,70517561  | 0,17  | 0,784792929 |
| LOC102631993 | 0,24  | 0,660482793 | 0,11  | 0,804868131 | -0,09 | 0,894239558 | 0,06  | 0,874904932 | 0,01  | 0,993903627 |
| LOC102632031 | 0,21  | 0,687662951 | 0,18  | 0,816543137 | -0,21 | 0,794205353 | 0,19  | 0,909976349 | -0,45 | 0,720844381 |
| LOC102632079 | 0,41  | 0,467442016 | 0,07  | 0,930192503 | -0,13 | 0,804012085 | 0     | 1           | -0,13 | 0,865258929 |
| LOC102632231 | 0,23  | 0,646877662 | 0     | 1           | -0,07 | 0,930645703 | 0,09  | 0,892416091 | 0,13  | 0,939448119 |
| LOC102632357 | 0,02  | 0,984972115 | -0,05 | 0,913145309 | -0,23 | 0,70365819  | 0,1   | 0,813465331 | -0,08 | 0,935812103 |
| LOC102632416 | 0,36  | 0,630905267 | 0,31  | 0,756584634 | -0,01 | 0,992973059 | 0,05  | 0,900742855 | -0,08 | 0,939127163 |
| LOC102632463 | -0,01 | 0,984040323 | -0,09 | 0,883843639 | -0,11 | 0,867543859 | 0,24  | 0,580120569 | -0,03 | 0,975441362 |
| LOC102632465 | 0,19  | 0,734646609 | -0,03 | 0,98230594  | 0,07  | 0,953917674 | 0,2   | 0,816899875 | 0,05  | 0,968130547 |
| LOC102632538 | 0,1   | 0,89081819  | -0,2  | 0,637595325 | -0,06 | 0,953074345 | -0,23 | 0,459812672 | -0,28 | 0,602530139 |
| LOC102632739 | -0,03 | 0,959985598 | 0,01  | 0,989873399 | 0,16  | 0,817818413 | 0,45  | 0,177569419 | -0,03 | 0,976743304 |
| LOC102632821 | 0,42  | 0,619463695 | 0,14  | 0,923044405 | 0     | 0,998315898 | 0,44  | 0,365856176 | 0,72  | 0,16865504  |
| LOC102633321 | -0,05 | 0,941126856 | 0,17  | 0,760864285 | -0,11 | 0,847564027 | 0,04  | 0,940352672 | -0,09 | 0,917354221 |
| LOC102633724 | 0,1   | 0,887423906 | 0,11  | 0,904698551 | -0,03 | 0,983471086 | -0,16 | 0,69151142  | -0,02 | 0,980961333 |
| LOC102633794 | -0,27 | 0,682102965 | -0,13 | 0,829770627 | -0,25 | 0,682931047 | -0,14 | 0,852687535 | 0,34  | 0,753693863 |
| LOC102633930 | 0     | 0,999288019 | 0,13  | 0,908181649 | -0,14 | 0,804607903 | -0,56 | 0,313125943 | 0,34  | 0,700875396 |
| LOC102634058 | 0,15  | 0,803761785 | 0,12  | 0,900776574 | 0,11  | 0,856636502 | 0,25  | 0,603611964 | 0,04  | 0,959573673 |
| LOC102634154 | 0,23  | 0,764288636 | 0,1   | 0,821170447 | -0,67 | 0,440593105 | 0,16  | 0,625944412 | 0,52  | 0,323249283 |
| LOC102634296 | -0,05 | 0,964124037 | 0,75  | 0,409204827 | 0,13  | 0,862146599 | -0,84 | 0,089879955 | -0,43 | 0,48749006  |
| LOC102634333 | 0,07  | 0,887555241 | -0,15 | 0,874356923 | 0,8   | 0,244469516 | 0,08  | 0,89150663  | 0,35  | 0,566248044 |
| LOC102634389 | 0,12  | 0,84900712  | 0,06  | 0,916496897 | -0,17 | 0,820627232 | -0,24 | 0,57372642  | 0,02  | 0,991418175 |
| LOC102634401 | -0,17 | 0,676906193 | 0     | 1           | -0,18 | 0,761826181 | 0,12  | 0,745159546 | 0,15  | 0,799199452 |
| LOC102634429 | 0,02  | 0,966775766 | 0,03  | 0,947107147 | -0,2  | 0,777810365 | 0,01  | 0,98482897  | 0     | 0,997070668 |

|              |       |             |       |             |       |             |       |             |       |             |
|--------------|-------|-------------|-------|-------------|-------|-------------|-------|-------------|-------|-------------|
| LOC102634459 | 0,38  | 0,552331623 | 0,13  | 0,883145635 | -0,22 | 0,777918093 | 0,35  | 0,58975625  | 0,04  | 0,982175252 |
| LOC102634533 | -0,28 | 0,876019664 | 0,09  | 0,974580396 | -0,24 | 0,867109522 | -1    | 0,198481557 | -0,47 | 0,657070737 |
| LOC102634709 | 0,25  | 0,557855331 | 0,13  | 0,794404033 | -0,26 | 0,788013674 | 0,28  | 0,57879104  | 0,06  | 0,952296554 |
| LOC102634852 | 0,03  | 0,972667767 | 0,02  | 0,989873399 | -0,04 | 0,971275853 | -0,1  | 0,776545078 | -0,02 | 0,985300306 |
| LOC102634968 | 0,01  | 0,992045436 | -0,05 | 0,952293161 | 0,05  | 0,955742302 | 0,17  | 0,701167068 | -0,07 | 0,927536545 |
| LOC102635154 | 0,29  | 0,4645006   | -0,04 | 0,988653513 | 0,48  | 0,633606377 | -0,12 | 0,932315462 | 0,36  | 0,698816716 |
| LOC102635342 | -0,06 | 0,966775766 | -0,13 | 0,89545828  | -0,4  | 0,602775092 | -0,13 | 0,880719206 | -0,55 | 0,318394434 |
| LOC102635502 | -0,33 | 0,43885887  | 0,09  | 0,916730432 | -0,08 | 0,897963852 | 0,28  | 0,451626908 | 0,3   | 0,697757911 |
| LOC102635521 | 0,08  | 0,901227658 | 0,01  | 0,988653513 | -0,09 | 0,932577939 | -0,23 | 0,592457782 | -0,13 | 0,897611151 |
| LOC102635527 | -0,3  | 0,487185115 | 0,21  | 0,843162191 | -0,2  | 0,721083003 | -0,36 | 0,459812672 | 0,21  | 0,728483022 |
| LOC102635566 | 0,38  | 0,56652162  | 0,28  | 0,610055593 | -0,1  | 0,885042765 | -0,12 | 0,898690469 | 0,32  | 0,766162221 |
| LOC102635682 | 0     | 0,997933333 | 0,17  | 0,781665479 | 0,05  | 0,963357998 | -0,05 | 0,909976349 | -0,01 | 0,989838283 |
| LOC102635707 | 0,61  | 0,194005514 | -0,06 | 0,923174593 | 0,38  | 0,720069267 | 0,14  | 0,795911056 | 0,04  | 0,959573673 |
| LOC102635786 | -0,05 | 0,94739162  | 0,14  | 0,74245372  | 0,09  | 0,918291931 | -0,25 | 0,537609273 | 0,18  | 0,826632866 |
| LOC102635801 | -0,03 | 0,975506993 | -0,09 | 0,852221763 | -0,06 | 0,941627748 | -0,07 | 0,923990041 | 0,32  | 0,567306543 |
| LOC102635948 | 0,23  | 0,833900133 | 0,17  | 0,785128233 | 0,26  | 0,801755243 | -0,14 | 0,85301747  | -0,2  | 0,840036408 |
| LOC102635990 | 0,09  | 0,939237777 | -0,31 | 0,509013394 | 0,06  | 0,948552385 | 0,14  | 0,81096279  | 0,02  | 0,984125319 |
| LOC102636101 | 0,14  | 0,766194359 | -0,02 | 0,970980557 | -0,05 | 0,953345773 | 0,5   | 0,200972441 | 0,38  | 0,495065595 |
| LOC102636254 | 0,35  | 0,642385552 | 0,37  | 0,5806682   | 0,09  | 0,915836302 | -0,14 | 0,859859031 | 0,59  | 0,671145344 |
| LOC102636309 | 0,73  | 0,356134523 | -0,14 | 0,936273494 | -0,23 | 0,78634406  | -0,31 | 0,757229967 | -0,65 | 0,525347564 |
| LOC102636349 | 0,22  | 0,72711401  | 0,19  | 0,786394409 | -0,07 | 0,923350407 | -0,24 | 0,716627025 | 0,07  | 0,960974478 |
| LOC102636360 | 0,15  | 0,867243066 | 0,09  | 0,867265251 | -0,04 | 0,96886101  | -0,31 | 0,51910611  | 0,03  | 0,979392852 |
| LOC102636380 | 0,25  | 0,568787523 | 0,4   | 0,325771646 | -0,23 | 0,667627312 | -0,53 | 0,164734522 | 0,06  | 0,950267521 |
| LOC102636406 | 0,13  | 0,84900712  | -0,01 | 0,990272104 | 0,04  | 0,957847613 | 0,18  | 0,643029225 | 0,03  | 0,97425848  |
| LOC102636530 | -0,1  | 0,892124736 | 0,09  | 0,864680059 | 0,19  | 0,806044178 | 0,02  | 0,970771707 | -0,03 | 0,972590168 |
| LOC102636563 | 0,83  | 0,513412557 | -0,09 | 0,89647435  | -0,44 | 0,628048897 | -0,07 | 0,932437932 | 0,12  | 0,898448235 |
| LOC102636664 | 0,26  | 0,545805455 | -0,2  | 0,641792237 | -0,09 | 0,888956864 | -0,07 | 0,854971757 | -0,07 | 0,934344891 |
| LOC102636700 | -0,1  | 0,866900494 | -0,15 | 0,761404909 | 0,03  | 0,971668287 | 0,18  | 0,664507481 | -0,33 | 0,587305934 |
| LOC102636777 | 0,53  | 0,267064564 | -0,14 | 0,869734155 | -0,17 | 0,85833551  | -0,27 | 0,726287112 | 0,28  | 0,712793529 |
| LOC102636795 | 0,28  | 0,46691413  | 0,05  | 0,935026031 | 0,03  | 0,97218538  | -0,02 | 0,98485032  | -0,44 | 0,374616846 |
| LOC102636988 | 0,2   | 0,775384541 | -0,19 | 0,901321339 | -0,11 | 0,938771378 | 0,2   | 0,835800558 | 0,27  | 0,777805633 |
| LOC102636989 | -0,16 | 0,746700079 | -0,07 | 0,945143056 | -0,15 | 0,877023506 | 0,12  | 0,898801714 | -0,15 | 0,884244347 |
| LOC102637163 | 0,16  | 0,721797378 | 0,17  | 0,712546063 | -0,01 | 0,985326269 | -0,09 | 0,815912677 | 0     | 0,998444219 |
| LOC102637192 | 0,3   | 0,614842736 | 0,09  | 0,855632384 | -0,08 | 0,901410016 | -0,24 | 0,627089222 | -0,48 | 0,316401979 |
| LOC102637278 | 0     | 0,997780127 | -0,17 | 0,752671263 | -0,27 | 0,552409541 | 0,07  | 0,90529096  | 0,25  | 0,64987147  |



|              |       |             |       |             |       |             |       |             |       |             |
|--------------|-------|-------------|-------|-------------|-------|-------------|-------|-------------|-------|-------------|
| LOC102637354 | 0,07  | 0,96311249  | 0,12  | 0,934294134 | -0,12 | 0,94110925  | -0,44 | 0,2423686   | -0,39 | 0,474415415 |
| LOC102637515 | 0     | 0,995482647 | -0,14 | 0,824113739 | -0,01 | 0,996286252 | -0,06 | 0,932289307 | -0,22 | 0,829280005 |
| LOC102637542 | 0,04  | 0,956705598 | -0,28 | 0,646170664 | 0,29  | 0,849635871 | 0,26  | 0,446858732 | 0,23  | 0,749100093 |
| LOC102637577 | 0     | 0,998017023 | -0,03 | 0,95872214  | -0,1  | 0,868054401 | 0,03  | 0,943143586 | 0,02  | 0,984632256 |
| LOC102637578 | 0,07  | 0,91409989  | 0,16  | 0,760685398 | -0,15 | 0,783643428 | -0,22 | 0,649456235 | 0,07  | 0,929780699 |
| LOC102637646 | 0,11  | 0,81630789  | 0,15  | 0,781046971 | 0,31  | 0,521569092 | -0,22 | 0,675160655 | -0,18 | 0,799510708 |
| LOC102637720 | -0,01 | 0,989784447 | -0,07 | 0,949561659 | 0,03  | 0,974887915 | -0,1  | 0,895836916 | -0,16 | 0,879075155 |
| LOC102637737 | -0,06 | 0,910311858 | 0,06  | 0,896322235 | -0,24 | 0,66424919  | -0,06 | 0,891764078 | 0,18  | 0,77006342  |
| LOC102637763 | -0,09 | 0,833275012 | -0,26 | 0,691896895 | -0,15 | 0,782903557 | 0,33  | 0,426759693 | 0,13  | 0,840531579 |
| LOC102637854 | 0,22  | 0,664036618 | 0,24  | 0,801259805 | -0,73 | 0,399470425 | -0,65 | 0,455936565 | 0,81  | 0,404813316 |
| LOC102637873 | 0,13  | 0,830575431 | 0     | 1           | -0,05 | 0,949135765 | -0,07 | 0,850208629 | -0,2  | 0,765809384 |
| LOC102637942 | -0,11 | 0,892141122 | 0,09  | 0,867265251 | 0,01  | 0,987356432 | -0,27 | 0,72638972  | -0,34 | 0,698795718 |
| LOC102638002 | 0,16  | 0,826083295 | 0,13  | 0,86198859  | -0,1  | 0,923520317 | 0,05  | 0,950082402 | 0,22  | 0,840132007 |
| LOC102638083 | 0,42  | 0,360097845 | -0,42 | 0,558015928 | -0,06 | 0,970939073 | -0,26 | 0,645613173 | 0,44  | 0,590339443 |
| LOC102638085 | -0,69 | 0,488512756 | 0,48  | 0,755498335 | -0,18 | 0,882359468 | -1,21 | 0,204719181 | -0,68 | 0,548871936 |
| LOC102638255 | 0,5   | 0,524017783 | 0,17  | 0,86410431  | -0,06 | 0,952104131 | -0,12 | 0,849242587 | 0     | 0,997254437 |
| LOC102638754 | -0,36 | 0,685972631 | -0,02 | 0,994137877 | -0,06 | 0,953738148 | 0,48  | 0,504617071 | 0,45  | 0,694233384 |
| LOC102638785 | 0,1   | 0,825621523 | 0,09  | 0,852461907 | 0,22  | 0,909963525 | 0,03  | 0,943864463 | -0,08 | 0,931519966 |
| LOC102638888 | -0,24 | 0,613990129 | 0,06  | 0,903674951 | -0,5  | 0,31670315  | -0,1  | 0,779547737 | -0,24 | 0,648308545 |
| LOC102638940 | -0,13 | 0,801214074 | -0,24 | 0,66248025  | 0,62  | 0,483761569 | -0,59 | 0,468239117 | -1,02 | 0,323234795 |
| LOC102638985 | -0,08 | 0,865776054 | 0     | 1           | -0,05 | 0,946810097 | 0,02  | 0,967866794 | 0,16  | 0,824818547 |
| LOC102638993 | -0,07 | 0,882027826 | 0,05  | 0,951375162 | 0,32  | 0,703647945 | -0,08 | 0,891790388 | -0,04 | 0,977247356 |
| LOC102639013 | 0,11  | 0,830031987 | 0,07  | 0,882847123 | -0,07 | 0,941561196 | -0,31 | 0,362091772 | -0,23 | 0,669885528 |
| LOC102639145 | 0,08  | 0,874146026 | 0,05  | 0,945143056 | -0,38 | 0,435556279 | -0,12 | 0,765863459 | -0,08 | 0,906933153 |
| LOC102639184 | -0,23 | 0,886741208 | -0,28 | 0,589281517 | 0,28  | 0,674433389 | 0,04  | 0,958172386 | 0,17  | 0,880054033 |
| LOC102639518 | 0,08  | 0,871503466 | -0,01 | 0,995590426 | 0,13  | 0,806044178 | -0,14 | 0,787366945 | -0,13 | 0,892349039 |
| LOC102639543 | 1,62  | 0,196812523 | 1,82  | 0,087315688 | -1,78 | 0,179552168 | -0,16 | 0,703627304 | 2,43  | 0,001036737 |
| LOC102639683 | 0,24  | 0,682574629 | 0,17  | 0,801151945 | -0,43 | 0,638965268 | -0,25 | 0,623245048 | 0,32  | 0,653769438 |
| LOC102639847 | -0,22 | 0,59108421  | -0,26 | 0,666450149 | 0,07  | 0,909717677 | -0,05 | 0,945487259 | -0,33 | 0,601481833 |
| LOC102639888 | 0,23  | 0,648730873 | 0,17  | 0,872187376 | 0,04  | 0,961337501 | 0,25  | 0,594356513 | 0,1   | 0,905581898 |
| LOC102639987 | 0,32  | 0,656034838 | 0,33  | 0,535229346 | -0,23 | 0,780140976 | 0,19  | 0,671767657 | 0,39  | 0,632478417 |
| LOC102640140 | -0,18 | 0,71214723  | 0,08  | 0,891749049 | -0,04 | 0,963221639 | 0,23  | 0,661554419 | 0,12  | 0,88288747  |
| LOC102640325 | 0,36  | 0,758136438 | 0,23  | 0,732044571 | -0,1  | 0,879316358 | 0,11  | 0,883575155 | 0,15  | 0,859663155 |
| LOC102640526 | 0,32  | 0,568902511 | 0,39  | 0,618087796 | -0,13 | 0,921956183 | -0,1  | 0,903739255 | 0,08  | 0,954694993 |
| LOC102640586 | -0,16 | 0,717513868 | 0,04  | 0,940046211 | -0,23 | 0,742758388 | 0,11  | 0,757938082 | 0,18  | 0,781777975 |

|              |       |             |       |             |       |             |       |             |       |             |
|--------------|-------|-------------|-------|-------------|-------|-------------|-------|-------------|-------|-------------|
| LOC102640619 | 0,49  | 0,235875528 | -0,23 | 0,751316952 | 0,08  | 0,941480326 | 0,14  | 0,837915953 | -0,63 | 0,46391899  |
| LOC102640811 | 0,37  | 0,474293292 | 0,24  | 0,626813483 | 0,02  | 0,984778342 | 0,1   | 0,812625466 | 0,14  | 0,845218636 |
| LOC102640923 | 0,13  | 0,766662919 | -0,33 | 0,781665479 | -0,32 | 0,620837479 | 0,53  | 0,458074566 | 0,3   | 0,763240477 |
| LOC102641079 | 0,03  | 0,989996539 | -0,45 | 0,557880587 | -0,1  | 0,919153025 | -0,75 | 0,376631277 | -1,34 | 0,146960218 |
| LOC102641083 | 0,13  | 0,803761785 | 0,02  | 0,990654073 | -0,22 | 0,736837174 | 0,23  | 0,519312395 | -0,16 | 0,792305774 |
| LOC102641156 | 0,18  | 0,664836665 | -0,05 | 0,909658961 | -0,39 | 0,402779579 | 0,06  | 0,87429919  | 0,16  | 0,809383333 |
| LOC102641351 | -0,02 | 0,970286316 | -0,02 | 0,981586987 | -0,06 | 0,932706021 | -0,21 | 0,531231504 | -0,01 | 0,992438465 |
| LOC102641455 | 0,07  | 0,903817676 | -0,02 | 0,972706967 | -0,18 | 0,715547198 | -0,05 | 0,899335603 | 0,02  | 0,980961333 |
| LOC102641675 | 0,1   | 0,903666411 | 0,16  | 0,807463629 | -0,36 | 0,693655482 | -0,01 | 0,978071796 | 0,57  | 0,210947151 |
| LOC102641711 | -0,1  | 0,888434239 | -0,35 | 0,528474602 | -0,17 | 0,746677927 | -0,09 | 0,896599656 | -0,48 | 0,496943075 |
| LOC102641730 | -0,09 | 0,858748956 | 0     | 1           | -0,04 | 0,961337501 | 0,02  | 0,972584224 | -0,11 | 0,884640084 |
| LOC102641761 | -0,17 | 0,698332739 | 0,46  | 0,402975324 | -0,15 | 0,841669036 | -0,59 | 0,327860008 | -0,39 | 0,575912277 |
| LOC102641848 | 0,14  | 0,723086689 | 0,08  | 0,882589938 | -0,06 | 0,947870534 | 0,71  | 0,057820993 | 0,19  | 0,74624632  |
| LOC102641980 | 0,37  | 0,488512756 | 0,08  | 0,894571363 | 0,09  | 0,892705612 | -0,11 | 0,800728247 | -0,15 | 0,823098095 |
| LOC102642045 | -0,13 | 0,883130741 | -0,06 | 0,902742963 | 0,28  | 0,702978742 | -0,02 | 0,963394273 | -0,33 | 0,567590783 |
| LOC102642117 | 0,13  | 0,760872819 | 0,15  | 0,794404033 | -0,12 | 0,849342965 | -0,05 | 0,911831177 | 0,15  | 0,810820885 |
| LOC102642140 | -0,38 | 0,317202788 | -0,15 | 0,729741948 | -0,11 | 0,915321116 | 0,46  | 0,197646348 | 0,1   | 0,876418697 |
| LOC102642189 | -0,13 | 0,815599419 | 0,04  | 0,937377463 | 0,04  | 0,967930981 | 0,31  | 0,441190012 | -0,05 | 0,954316248 |
| LOC102642191 | 0,22  | 0,656034838 | 0,13  | 0,856132795 | -0,12 | 0,879141223 | 0,07  | 0,873610553 | 0,11  | 0,86570087  |
| LOC102642336 | -0,02 | 0,973083012 | 0,22  | 0,716661568 | 0,23  | 0,809137779 | -0,12 | 0,922740736 | 0,28  | 0,797167184 |
| LOC102642420 | 0,1   | 0,932324918 | -0,24 | 0,763005394 | 0,33  | 0,694952122 | -0,01 | 0,996451727 | -0,15 | 0,933307994 |
| LOC102642530 | 0,3   | 0,771252343 | 0,06  | 0,970832543 | 0,03  | 0,980963931 | -0,5  | 0,343209274 | 0,02  | 0,983877321 |
| LOC102642584 | 0,16  | 0,830551581 | -0,05 | 0,945143056 | -0,08 | 0,953622038 | -1,86 | 0,012175785 | -0,56 | 0,520355748 |
| LOC102642670 | 0,29  | 0,660979798 | 0,28  | 0,537678815 | -0,78 | 0,225406443 | 0,42  | 0,2834112   | 0,56  | 0,219156089 |
| LOC102642717 | 0,03  | 0,984096321 | -0,37 | 0,562912319 | 0,23  | 0,847287567 | -0,79 | 0,141238339 | -0,53 | 0,673577848 |
| LOC102642718 | 0,2   | 0,687662951 | 0,29  | 0,703255839 | -0,04 | 0,968742139 | -1,4  | 0,181187575 | 0,12  | 0,946093915 |
| LOC102642817 | -0,12 | 0,795659022 | -0,03 | 0,954024651 | -0,21 | 0,704777249 | 0,15  | 0,680497621 | 0,21  | 0,733405192 |
| LOC102642818 | 0,14  | 0,77886874  | 0,09  | 0,882847123 | -0,28 | 0,568962531 | 0,15  | 0,698921024 | 0,16  | 0,797293554 |
| LOC102642825 | 0,42  | 0,586458491 | -0,11 | 0,926157704 | -0,33 | 0,737241227 | 0,2   | 0,840665558 | 0,27  | 0,76521225  |
| LOC102642832 | 0,1   | 0,911800803 | 0,63  | 0,49125334  | -1,55 | 0,302861841 | -0,54 | 0,785767773 | 1,03  | 0,613018522 |
| LOC102642925 | -0,32 | 0,456308753 | 0     | 1           | 0,07  | 0,925417014 | -0,06 | 0,916228385 | -0,08 | 0,950267521 |
| LOC102642946 | 0,26  | 0,671077469 | 0,04  | 0,95264646  | -0,12 | 0,864411302 | -0,14 | 0,711744566 | 0,26  | 0,68987325  |
| LOC102643030 | 0,09  | 0,926452636 | -0,07 | 0,867989599 | 0,08  | 0,925248877 | 0,03  | 0,955464588 | -0,01 | 0,990091016 |
| LOC102643083 | 0,07  | 0,925510521 | 0,32  | 0,646613262 | -0,24 | 0,826241249 | -0,34 | 0,575395161 | -0,56 | 0,383190821 |
| LOC102643096 | 0,14  | 0,758545239 | 0     | 1           | -0,07 | 0,916403684 | 0,07  | 0,864379203 | -0,15 | 0,801385411 |

|              |       |             |       |             |       |             |       |             |       |             |
|--------------|-------|-------------|-------|-------------|-------|-------------|-------|-------------|-------|-------------|
| LOC102643177 | 0,04  | 0,928103232 | 0,07  | 0,920880847 | -0,22 | 0,697890099 | 0,05  | 0,913440308 | 0,08  | 0,927536545 |
| LOC102643184 | -0,2  | 0,617280733 | 0,12  | 0,811823428 | 0,32  | 0,591404136 | 0,47  | 0,212441993 | 0,05  | 0,949178165 |
| LOC102643255 | -0,04 | 0,956452501 | -0,04 | 0,963791015 | 0,05  | 0,947881687 | -0,03 | 0,954177755 | 0,02  | 0,979152939 |
| LOC102643267 | 0,11  | 0,839118329 | 0     | 1           | -0,21 | 0,720069267 | 0,01  | 0,988205241 | 0,09  | 0,904371266 |
| LOC105242387 | -0,03 | 0,974815646 | 0,17  | 0,714037771 | -0,08 | 0,89248624  | -0,11 | 0,756093938 | 0,04  | 0,960974478 |
| LOC105242453 | 0,5   | 0,37023946  | -0,22 | 0,827228251 | 0,55  | 0,415635321 | -0,29 | 0,793039697 | -0,16 | 0,939127163 |
| LOC105243004 | 0,08  | 0,888840601 | -0,18 | 0,674709201 | 0,08  | 0,901410016 | -0,09 | 0,847194434 | 0,01  | 0,988084587 |
| LOC105243404 | -0,05 | 0,928944712 | -0,05 | 0,911258707 | 0,01  | 0,994530858 | -1,56 | 0,014189926 | -1,89 | 0,020323407 |
| LOC105243573 | -0,34 | 0,534017117 | 0,02  | 0,989327073 | 0,28  | 0,633606377 | 0,24  | 0,461412838 | 0,18  | 0,776251218 |
| LOC105243654 | -0,29 | 0,728530978 | -0,08 | 0,91742429  | 0,42  | 0,442256621 | 0,72  | 0,094905894 | 0,01  | 0,9939542   |
| LOC105244007 | 0,15  | 0,770632132 | -0,03 | 0,976583732 | -0,26 | 0,598179126 | -0,08 | 0,837974367 | 0,17  | 0,824818547 |
| LOC105244059 | 0,03  | 0,958444523 | 0,18  | 0,817365391 | 0,26  | 0,599202081 | -0,07 | 0,875993251 | -0,08 | 0,911686554 |
| LOC105244102 | -0,06 | 0,94815841  | 0,03  | 0,952427593 | 0,09  | 0,929395646 | -0,28 | 0,660090125 | -0,18 | 0,848589284 |
| LOC105244124 | 0,13  | 0,78476082  | 0,22  | 0,577702349 | 0,14  | 0,816372481 | -0,1  | 0,842011593 | 0     | 0,997299415 |
| LOC105244170 | 0,17  | 0,670502863 | 0,14  | 0,789051952 | -0,21 | 0,747767515 | 0,26  | 0,488287457 | 0,21  | 0,71265105  |
| LOC105244195 | -0,1  | 0,846313357 | 0,06  | 0,9381453   | 0,01  | 0,99129124  | -0,1  | 0,807561855 | -0,14 | 0,848562883 |
| LOC105244487 | 0,78  | 0,281151759 | 0,62  | 0,509013394 | 0     | 0,999931921 | -0,36 | 0,324591518 | -0,4  | 0,442929147 |
| LOC105244993 | 0,37  | 0,430723846 | -0,02 | 0,97230307  | -0,13 | 0,813104232 | 0,01  | 0,986768223 | -0,05 | 0,956639358 |
| LOC105245440 | 0,15  | 0,864403632 | 0,02  | 0,977206884 | 0,52  | 0,506787649 | 0,01  | 0,980724248 | -0,25 | 0,652073004 |
| LOC105245566 | 0,08  | 0,882119027 | -0,03 | 0,947263853 | -0,21 | 0,772008734 | -0,07 | 0,899003207 | 0,28  | 0,616797608 |
| LOC105245970 | -0,25 | 0,565243105 | -0,03 | 0,961657201 | -0,05 | 0,958851839 | 0     | 0,999221046 | 0,14  | 0,881968395 |
| LOC105246071 | 0,26  | 0,739249714 | -0,37 | 0,781013517 | -0,08 | 0,94930407  | 1,09  | 0,065973786 | 0,76  | 0,351204278 |
| LOC105246506 | 0,18  | 0,855264133 | 0,1   | 0,91395667  | -0,48 | 0,387362229 | -0,05 | 0,909420447 | 0,23  | 0,718579256 |
| LOC105246531 | -0,47 | 0,465168175 | 0,03  | 0,958856577 | 0,09  | 0,940489823 | -0,3  | 0,477970735 | -0,13 | 0,893737959 |
| LOC105246847 | -0,14 | 0,821267687 | 0,05  | 0,929289366 | -0,24 | 0,70635953  | 0,31  | 0,490176405 | 0,12  | 0,915356549 |
| LOC105247168 | -0,16 | 0,842504427 | -0,21 | 0,771806358 | 0     | 0,997268369 | -0,2  | 0,769701225 | -0,31 | 0,699671375 |
| LOC105247423 | 0,33  | 0,645683269 | 0,77  | 0,458336745 | -0,59 | 0,520548688 | 0,04  | 0,963752888 | 0,92  | 0,124532732 |
| LOC105247529 | 0,01  | 0,996219097 | 0     | 1           | 0,42  | 0,56948206  | 0,76  | 0,273555943 | 0,18  | 0,823098095 |
| LOC105247602 | 0,23  | 0,59710379  | 0,57  | 0,480808447 | -0,11 | 0,853040826 | 0     | 0,997932303 | -0,07 | 0,946170694 |
| LOC105247620 | 0,31  | 0,460231397 | 0,05  | 0,941603439 | -0,22 | 0,698451287 | 0,11  | 0,794368434 | -0,12 | 0,898185407 |
| LOC106740    | -0,06 | 0,953802175 | 0,27  | 0,609576972 | -0,19 | 0,915447788 | 0,25  | 0,852596465 | 0,34  | 0,794769197 |
| LOC269472    | 0,53  | 0,775326761 | 0,71  | 0,493964634 | 0,19  | 0,904057901 | -0,07 | 0,971151107 | 0,15  | 0,949032619 |
| LOC330143    | -0,77 | 0,536125623 | -0,62 | 0,656204868 | 0,27  | 0,813287877 | 1,55  | 0,075822599 | -0,25 | 0,833124162 |
| LOC331528    | 0,81  | 0,157853388 | 0,36  | 0,764289173 | -0,11 | 0,880706627 | -0,49 | 0,307744759 | -0,25 | 0,628127128 |
| LOC382693    | -0,04 | 0,930509569 | 0,03  | 0,961333446 | 0,06  | 0,933080127 | -0,23 | 0,490176405 | 0,1   | 0,906338603 |

|           |       |             |       |             |       |             |       |             |       |             |
|-----------|-------|-------------|-------|-------------|-------|-------------|-------|-------------|-------|-------------|
| LOC432596 | 0,01  | 0,988396091 | -0,56 | 0,594415097 | 0     | 0,999931921 | -0,04 | 0,941913622 | 0,01  | 0,992334873 |
| LOC432842 | -0,18 | 0,63880179  | 0,04  | 0,936190607 | 0,28  | 0,530318769 | -0,13 | 0,728249817 | -0,14 | 0,860316223 |
| LOC433461 | 0,32  | 0,586458491 | -0,12 | 0,764491894 | -0,11 | 0,88185877  | -0,3  | 0,451614744 | -0,28 | 0,638141544 |
| LOC435333 | 0,11  | 0,840882072 | -0,05 | 0,929289366 | -0,12 | 0,826526709 | 0     | 1           | 0,08  | 0,920748161 |
| LOC545403 | -0,05 | 0,921306075 | 0,09  | 0,831580851 | -0,06 | 0,932577939 | -0,1  | 0,821175937 | -0,1  | 0,912890826 |
| LOC545466 | 0,06  | 0,963865514 | -0,17 | 0,842145037 | -0,08 | 0,940335002 | 0,16  | 0,857910103 | 0,66  | 0,379020307 |
| LOC547323 | -0,21 | 0,763657448 | 0,16  | 0,697811585 | -0,19 | 0,777417583 | 0,29  | 0,596934527 | -0,06 | 0,961406182 |
| LOC547349 | 0,1   | 0,822107047 | 0,03  | 0,965194376 | -0,39 | 0,418405756 | 0,05  | 0,92755654  | 0,37  | 0,552380344 |
| LOC552890 | -0,14 | 0,819133805 | 0     | 1           | 0,02  | 0,983858573 | 0,42  | 0,428295778 | 0,22  | 0,730866874 |
| LOC637260 | -0,04 | 0,936871609 | -0,37 | 0,579053234 | 0,23  | 0,741623367 | 0,01  | 0,981203009 | 0,05  | 0,960065122 |
| LOC664787 | 0,2   | 0,896249068 | 0,71  | 0,62078382  | -0,84 | 0,15369828  | -0,53 | 0,789082749 | 1,27  | 0,436974768 |
| LOC665506 | 0,1   | 0,832696131 | 0     | 1           | 0,16  | 0,772967306 | 0,03  | 0,957427513 | -0,03 | 0,976743304 |
| LOC666331 | 0,07  | 0,869085391 | -0,03 | 0,955891382 | -0,04 | 0,967767582 | 0,24  | 0,594365292 | 0,22  | 0,806418575 |
| LOC675947 | -0,32 | 0,547914659 | 0,34  | 0,508633526 | -0,57 | 0,448187507 | -0,38 | 0,335213853 | -0,15 | 0,823098095 |
| LOC73899  | 0,01  | 0,982432452 | -0,33 | 0,702251293 | 0,36  | 0,746677927 | 0,34  | 0,471583673 | 0,21  | 0,769225414 |
| Lockd     | -0,92 | 0,104092085 | -0,92 | 0,302028989 | 0,67  | 0,143198149 | 1,93  | 0,057794359 | -0,47 | 0,608004947 |
| Lonp1     | -0,35 | 0,600589233 | -0,3  | 0,781665479 | 0,36  | 0,615388079 | 0,44  | 0,772783569 | 0,14  | 0,947437555 |
| Lonp2     | -0,2  | 0,66331039  | 0,04  | 0,965042946 | 0,1   | 0,909371204 | -0,53 | 0,242236632 | 0,29  | 0,635612479 |
| Lonrf1    | 0,3   | 0,742769042 | 0,17  | 0,873107937 | 0,24  | 0,80420736  | 0,67  | 0,365180277 | 0,38  | 0,773503402 |
| Lonrf2    | -0,14 | 0,863067773 | -0,4  | 0,583764309 | -0,06 | 0,954229024 | 0,52  | 0,198829071 | 0,28  | 0,771954227 |
| Lonrf3    | -0,07 | 0,960597621 | -0,22 | 0,842145037 | -0,29 | 0,856416051 | -2,37 | 0,080547108 | 1,31  | 0,229389194 |
| Lor       | 0,37  | 0,460726931 | 0,41  | 0,763796207 | 0,36  | 0,85833551  | 0,06  | 0,967866794 | 0,55  | 0,629683647 |
| Lox       | -0,17 | 0,827830958 | 0,33  | 0,660922274 | 0,06  | 0,948637233 | -0,95 | 0,216023172 | 0,27  | 0,832781095 |
| Loxhd1    | 0,32  | 0,591725454 | -0,17 | 0,855187815 | 0,02  | 0,980713449 | 0,1   | 0,882478591 | 0,14  | 0,843351909 |
| Loxl1     | -0,45 | 0,575887113 | 0,67  | 0,370515616 | -0,07 | 0,963018377 | -0,23 | 0,778736686 | -0,04 | 0,976430805 |
| Loxl2     | -0,29 | 0,724736278 | -0,12 | 0,951768918 | 0,15  | 0,911634383 | 0,44  | 0,605029688 | -0,29 | 0,853251097 |
| Loxl3     | -0,32 | 0,792313188 | 0,35  | 0,703010486 | -0,01 | 0,993379272 | 0,07  | 0,960885529 | -0,5  | 0,604497615 |
| Loxl4     | 0,42  | 0,488690976 | 0,08  | 0,930911291 | 0,69  | 0,433682567 | 1,96  | 0,020857449 | 0,03  | 0,980117441 |
| Lpar1     | 0,27  | 0,885454906 | 0,07  | 0,970762922 | 0,07  | 0,96858449  | -0,25 | 0,824541521 | -0,14 | 0,868602248 |
| Lpar2     | 0,48  | 0,208808947 | -0,03 | 0,976583732 | 0,14  | 0,923048046 | 0,1   | 0,84956075  | -0,01 | 0,991216325 |
| Lpar3     | 0,06  | 0,888366049 | -0,08 | 0,884239192 | -0,17 | 0,848462153 | -0,1  | 0,837461612 | 0,17  | 0,853107295 |
| Lpar4     | -0,45 | 0,460231397 | -0,65 | 0,244522943 | 0,51  | 0,752660858 | 1,57  | 0,120678525 | -0,15 | 0,921173407 |
| Lpar5     | -0,07 | 0,903817676 | 0,27  | 0,552960632 | 0,06  | 0,946598383 | 0,19  | 0,857884225 | -0,11 | 0,927296036 |
| Lpar6     | -0,11 | 0,813604928 | -0,12 | 0,815708197 | -0,64 | 0,463843173 | 0,43  | 0,749064083 | -0,16 | 0,931519966 |
| Lpcat1    | -0,67 | 0,364644803 | -0,72 | 0,304034247 | 0,37  | 0,56948206  | -0,99 | 0,126023281 | -0,72 | 0,202369779 |

|         |       |             |       |             |       |             |       |             |       |             |
|---------|-------|-------------|-------|-------------|-------|-------------|-------|-------------|-------|-------------|
| Lpcat2  | 0,17  | 0,797024882 | -0,25 | 0,874195024 | 0,56  | 0,416568861 | -0,73 | 0,213861016 | -0,21 | 0,791694696 |
| Lpcat2b | 0,01  | 0,996219097 | 0,14  | 0,882589938 | -0,09 | 0,91291518  | -0,46 | 0,588755637 | 0,02  | 0,990633766 |
| Lpcat3  | -0,15 | 0,755619673 | -0,35 | 0,511278756 | 0,95  | 0,164746948 | 0,33  | 0,349614803 | -0,34 | 0,501560763 |
| Lpcat4  | 0,01  | 0,9947475   | -0,03 | 0,970832543 | 0,81  | 0,103072198 | 0,69  | 0,187765805 | -0,29 | 0,738853855 |
| Lpgat1  | 0,36  | 0,537473384 | -0,26 | 0,664787536 | 0,49  | 0,342313446 | 1,07  | 0,027423594 | -0,4  | 0,424156608 |
| Lpin1   | -0,48 | 0,542291761 | -0,48 | 0,571467181 | 0,24  | 0,802534871 | -0,15 | 0,800384828 | -0,78 | 0,235574745 |
| Lpin2   | 0,81  | 0,254980266 | 0,52  | 0,38616401  | -0,49 | 0,393592213 | -1,04 | 0,483157344 | -0,2  | 0,931482657 |
| Lpin3   | -0,69 | 0,180356049 | -0,5  | 0,403364852 | 0,54  | 0,647988621 | 1,48  | 0,067330881 | -1,64 | 0,029638137 |
| Lpl     | 0,64  | 0,276067733 | -1,14 | 0,14373283  | 0,16  | 0,940276719 | -2,77 | 0,029017177 | -0,94 | 0,305378718 |
| Lpo     | 0,21  | 0,66946372  | 0,14  | 0,826290896 | 0,1   | 0,904573436 | 0,14  | 0,820074317 | -0,02 | 0,982619371 |
| Lpp     | 0,41  | 0,239601221 | 0,25  | 0,531460115 | -0,39 | 0,48646529  | 0,87  | 0,093477927 | 0,86  | 0,117679228 |
| Lppos   | -0,44 | 0,576009654 | -0,17 | 0,862559271 | -0,48 | 0,304899885 | 0,22  | 0,718553452 | -0,3  | 0,653769438 |
| Lpxn    | 0,29  | 0,676906193 | 0,66  | 0,356560934 | -0,53 | 0,298529141 | -0,71 | 0,391327185 | -0,43 | 0,6317815   |
| Lrat    | -0,09 | 0,928944712 | 0,67  | 0,6817338   | -0,93 | 0,450605545 | -0,16 | 0,892186579 | 0,25  | 0,787779106 |
| Lrba    | -0,52 | 0,373844376 | -0,28 | 0,47498369  | 0,38  | 0,481896699 | -1,05 | 0,035434214 | 0,16  | 0,807725933 |
| Lrch1   | 0,4   | 0,40477934  | 0,85  | 0,109267475 | -0,72 | 0,365655887 | -0,84 | 0,096085093 | 0,24  | 0,730298091 |
| Lrch2   | -0,85 | 0,189684245 | 0,94  | 0,317236181 | -0,02 | 0,994225129 | -0,93 | 0,15999424  | -0,61 | 0,328082125 |
| Lrch3   | 0,05  | 0,964358894 | -0,16 | 0,84786877  | -0,28 | 0,762655576 | -0,47 | 0,437001295 | -0,1  | 0,940878193 |
| Lrcol1  | -0,17 | 0,7830424   | -0,34 | 0,639603025 | -0,12 | 0,864311451 | -0,04 | 0,94195604  | -0,02 | 0,99007652  |
| Lrfn1   | 0,07  | 0,934802231 | 0,43  | 0,397118736 | -0,26 | 0,724675525 | -0,16 | 0,811871922 | -0,08 | 0,939948423 |
| Lrfn2   | 0,04  | 0,976237719 | -0,31 | 0,702991386 | -0,36 | 0,492943578 | 0,01  | 0,988740719 | 0,35  | 0,54954024  |
| Lrfn3   | 0,34  | 0,687662951 | 0,11  | 0,842663656 | 0,36  | 0,560191012 | 1,16  | 0,378102359 | 0,01  | 0,996733137 |
| Lrfn4   | -0,3  | 0,548190621 | -0,31 | 0,625875078 | 0,56  | 0,433800451 | 0,19  | 0,858632076 | -0,21 | 0,805797585 |
| Lrfn5   | -0,18 | 0,664803559 | -0,19 | 0,656204868 | 0,02  | 0,988973569 | 0,08  | 0,850028877 | 0,01  | 0,9939542   |
| Lrg1    | -1,1  | 0,131976285 | -1,01 | 0,17631496  | 0,65  | 0,25755054  | 1,7   | 0,009399265 | -1,46 | 0,066861241 |
| Lrguk   | -0,09 | 0,885454906 | 0,39  | 0,648353961 | 0,09  | 0,905352348 | 0,22  | 0,735798963 | 0,46  | 0,429206436 |
| Lrif1   | 0,57  | 0,341657259 | 0,2   | 0,881113709 | 0,36  | 0,79541037  | -0,54 | 0,278204297 | 0,74  | 0,351364129 |
| Lrig1   | -0,31 | 0,72886117  | 0,58  | 0,256845239 | 0,83  | 0,51127708  | -0,82 | 0,122878937 | -0,09 | 0,956610289 |
| Lrig2   | 0,57  | 0,207100355 | -0,29 | 0,721934837 | 0,34  | 0,491116687 | -0,29 | 0,618209904 | -0,08 | 0,948206913 |
| Lrig3   | -0,74 | 0,328445973 | -0,69 | 0,74440861  | -0,65 | 0,552212491 | -0,22 | 0,879612976 | 0,01  | 0,995317748 |
| Lrit1   | -0,1  | 0,884431139 | 0,1   | 0,839283725 | 0,08  | 0,922027775 | 0,12  | 0,73574774  | -0,1  | 0,883592868 |
| Lrit2   | -0,05 | 0,940936429 | -0,64 | 0,442894522 | -0,24 | 0,765816672 | -0,29 | 0,700431952 | 0,05  | 0,973138547 |
| Lrit3   | 0,08  | 0,87350924  | 0,35  | 0,726849813 | -0,26 | 0,560191012 | -0,27 | 0,443395792 | 0,14  | 0,846306738 |
| Lrmp    | 0,08  | 0,925449982 | -0,39 | 0,653423189 | -0,61 | 0,333333292 | -0,25 | 0,774826947 | -0,23 | 0,852880773 |
| Lrp1    | -0,24 | 0,738714467 | 0,37  | 0,354667412 | 1,53  | 0,026694519 | -0,85 | 0,214389938 | -0,66 | 0,499989818 |

|         |       |             |       |             |       |             |       |             |       |             |
|---------|-------|-------------|-------|-------------|-------|-------------|-------|-------------|-------|-------------|
| Lrp10   | 0,24  | 0,576653024 | 0,02  | 0,982466032 | -0,05 | 0,951209773 | 0,95  | 0,026972102 | 0,22  | 0,674381312 |
| Lrp11   | -0,6  | 0,302609278 | 0,01  | 0,995350053 | -0,2  | 0,828129261 | 0,82  | 0,167942428 | -0,36 | 0,6754671   |
| Lrp12   | 0,02  | 0,989017567 | -0,04 | 0,984812702 | 0,21  | 0,802534871 | -0,11 | 0,943864463 | 0,16  | 0,912733818 |
| Lrp1b   | -0,19 | 0,708241576 | -0,27 | 0,546556396 | -0,17 | 0,8128837   | 0,24  | 0,571621443 | 0,01  | 0,992629177 |
| Lrp2    | 0,14  | 0,818182081 | 0,14  | 0,849747954 | 0,11  | 0,911634383 | -0,43 | 0,432857673 | 0,91  | 0,538811506 |
| Lrp2bp  | 0,27  | 0,602160482 | -0,18 | 0,782048012 | 0,35  | 0,662451176 | 0,5   | 0,246085743 | 0,15  | 0,858534673 |
| Lrp3    | -0,06 | 0,930134702 | -0,01 | 0,99611256  | -0,17 | 0,883495055 | -1,67 | 0,036766416 | -0,59 | 0,213778544 |
| Lrp4    | -1,08 | 0,215251359 | 0,01  | 0,998504901 | 1,73  | 0,02204647  | -1,35 | 0,136347812 | -0,57 | 0,581093802 |
| Lrp5    | -0,29 | 0,540696335 | -0,19 | 0,677026666 | 0,37  | 0,506222058 | -0,83 | 0,056397205 | -0,7  | 0,159252449 |
| Lrp6    | -0,47 | 0,59756524  | 0,02  | 0,988548122 | 0,33  | 0,513446928 | -0,49 | 0,400553189 | -0,51 | 0,374439274 |
| Lrp8    | -0,76 | 0,464156384 | -0,3  | 0,502180086 | 0,29  | 0,72132637  | 1,44  | 0,032054701 | 0,26  | 0,703670469 |
| Lrp8os1 | 0,15  | 0,778723429 | 0,1   | 0,852719676 | -0,21 | 0,717856288 | -0,06 | 0,8950324   | 0,03  | 0,97757951  |
| Lrp8os2 | -0,05 | 0,942119638 | 0,08  | 0,867265251 | 0,14  | 0,826241249 | 0,04  | 0,945953123 | 0,02  | 0,984125319 |
| Lrp8os3 | 0,06  | 0,905414735 | -0,37 | 0,525585717 | -0,39 | 0,566351122 | -0,04 | 0,940771365 | -0,07 | 0,940438527 |
| Lrpap1  | 0,07  | 0,89763852  | -0,04 | 0,970762922 | -0,08 | 0,906097666 | -0,65 | 0,079938142 | -0,04 | 0,968130547 |
| Lrpprc  | -0,45 | 0,557053469 | -0,33 | 0,692139075 | 0,8   | 0,299010171 | 0,34  | 0,387336963 | 0,49  | 0,30479841  |
| Lrr1    | -0,77 | 0,369418071 | -1,58 | 0,200639194 | 0,64  | 0,643853175 | 1,2   | 0,397213667 | -0,49 | 0,657263655 |
| Lrrc1   | 0,11  | 0,865092511 | 0,28  | 0,747928263 | 0,09  | 0,913333366 | -0,69 | 0,319057242 | 0,29  | 0,729027002 |
| Lrrc10  | -0,07 | 0,929638501 | -0,07 | 0,937377463 | -0,18 | 0,825125026 | 0,05  | 0,952839448 | -0,05 | 0,95587699  |
| Lrrc10b | -0,04 | 0,949063845 | 0     | 1           | -0,16 | 0,832155972 | -0,18 | 0,62296101  | -0,21 | 0,715879151 |
| Lrrc14  | 0     | 0,998027251 | -0,34 | 0,849520323 | -0,26 | 0,841563482 | -0,09 | 0,930681548 | -0,18 | 0,836205142 |
| Lrrc14b | 0,18  | 0,831529237 | -0,01 | 0,994137877 | -0,44 | 0,397054993 | 0,28  | 0,446956803 | 0,36  | 0,452376077 |
| Lrrc15  | -0,21 | 0,658266451 | -0,12 | 0,825692608 | -0,19 | 0,811669636 | 0,16  | 0,651335011 | 0,1   | 0,885318142 |
| Lrrc16a | 1,4   | 0,074890017 | 1,8   | 0,077698935 | -1,38 | 0,008372262 | -0,78 | 0,280843942 | 1,07  | 0,19541566  |
| Lrrc16b | -0,02 | 0,981778099 | -0,14 | 0,842793123 | -0,14 | 0,813794407 | -0,03 | 0,948859465 | -0,12 | 0,861056054 |
| Lrrc17  | -0,04 | 0,966775766 | -0,24 | 0,741939956 | -0,15 | 0,805783058 | 0,26  | 0,452631406 | 0,29  | 0,605912145 |
| Lrrc18  | 0,85  | 0,231812139 | -0,12 | 0,859585789 | -0,84 | 0,151294557 | 0,15  | 0,861506076 | 0,89  | 0,32673984  |
| Lrrc19  | -0,01 | 0,996998625 | 0,19  | 0,783325809 | -0,48 | 0,517241346 | 0,08  | 0,957782814 | 0,37  | 0,590339443 |
| Lrrc2   | -0,09 | 0,892823025 | 0,57  | 0,385387329 | 0,3   | 0,708812563 | -0,87 | 0,353716436 | -0,51 | 0,661549452 |
| Lrrc20  | -1,27 | 0,083335073 | -0,39 | 0,589100557 | 0,52  | 0,309282558 | 0,27  | 0,792680799 | -0,13 | 0,926627035 |
| Lrrc23  | 0,18  | 0,832696131 | 0,03  | 0,971464245 | -0,46 | 0,471873683 | 0,04  | 0,969963471 | -0,06 | 0,951471487 |
| Lrrc24  | 0,4   | 0,489008935 | 0,1   | 0,882516461 | -0,12 | 0,868938606 | -0,17 | 0,736730464 | -0,08 | 0,91314596  |
| Lrrc25  | -0,27 | 0,597519827 | -0,32 | 0,616459449 | 0,12  | 0,898935616 | 0,18  | 0,740120833 | 0,06  | 0,952206434 |
| Lrrc26  | -0,01 | 0,98456417  | 0,08  | 0,925981858 | 0,55  | 0,535165925 | 0,06  | 0,909433648 | 0,16  | 0,830813323 |
| Lrrc27  | 0,25  | 0,757032046 | -0,46 | 0,373555617 | 0,01  | 0,99407001  | 0,83  | 0,1166464   | 0,34  | 0,630186188 |

|        |       |             |       |             |       |             |       |             |       |             |
|--------|-------|-------------|-------|-------------|-------|-------------|-------|-------------|-------|-------------|
| Lrrc28 | 0,2   | 0,795659022 | -0,31 | 0,673542391 | 0,62  | 0,400880567 | 0,63  | 0,280695943 | 0,06  | 0,97425848  |
| Lrrc29 | 0,13  | 0,843924001 | -0,15 | 0,694017753 | 0,07  | 0,927301763 | -0,18 | 0,667468658 | 0,17  | 0,796146369 |
| Lrrc3  | 0     | 0,998769353 | -0,3  | 0,509796824 | -0,24 | 0,692591179 | -0,36 | 0,623678563 | -0,54 | 0,456564217 |
| Lrrc30 | -0,15 | 0,795286609 | -0,08 | 0,858064544 | -0,06 | 0,94247791  | 0,63  | 0,259705827 | 0,4   | 0,639345637 |
| Lrrc31 | 0,07  | 0,930134702 | 0,49  | 0,488326518 | -0,09 | 0,896453398 | -0,32 | 0,592708932 | -0,09 | 0,922466791 |
| Lrrc32 | -0,15 | 0,751237683 | -0,15 | 0,881113709 | -0,35 | 0,471873683 | -1,27 | 0,035978047 | -0,09 | 0,915363101 |
| Lrrc34 | -0,03 | 0,971245076 | -0,03 | 0,969314504 | -0,05 | 0,950725218 | 0,12  | 0,748929665 | 0,27  | 0,608004947 |
| Lrrc36 | -0,36 | 0,535827944 | -0,69 | 0,373158462 | 0,38  | 0,667037569 | 0,52  | 0,327747643 | 0,15  | 0,865258929 |
| Lrrc38 | 0,01  | 0,98600909  | 0,01  | 0,992175086 | -0,2  | 0,737241227 | 0,14  | 0,811006924 | 0,22  | 0,75695866  |
| Lrrc39 | -0,11 | 0,867243066 | -0,17 | 0,718431206 | 0,18  | 0,832500603 | 0,14  | 0,772508671 | 0,12  | 0,884640084 |
| Lrrc3b | -0,47 | 0,539226089 | -0,22 | 0,857531371 | -0,91 | 0,384101826 | -0,27 | 0,893609448 | -0,85 | 0,610076369 |
| Lrrc3c | -0,07 | 0,892823025 | -0,29 | 0,535567615 | -0,1  | 0,887458532 | 0,2   | 0,577432583 | -0,19 | 0,763240477 |
| Lrrc4  | 0,04  | 0,953175228 | 0,06  | 0,945012055 | -0,06 | 0,95106142  | 0,22  | 0,835442904 | 0,08  | 0,948835084 |
| Lrrc40 | -0,66 | 0,540296693 | -0,17 | 0,907547569 | 0,28  | 0,866141679 | 0,39  | 0,740510034 | 0,26  | 0,823098095 |
| Lrrc41 | -0,29 | 0,6226265   | -0,09 | 0,929289366 | -0,02 | 0,99129124  | 0,21  | 0,65601715  | -0,28 | 0,667628342 |
| Lrrc42 | -0,17 | 0,867953985 | 0,45  | 0,642541818 | 1,25  | 0,218970807 | 1,08  | 0,075520945 | 0,45  | 0,587735967 |
| Lrrc43 | 0,23  | 0,64776317  | -0,35 | 0,732044571 | 0,09  | 0,947881687 | 0,02  | 0,985633818 | -0,22 | 0,832781095 |
| Lrrc45 | 0,08  | 0,892141122 | 0,14  | 0,808222835 | 0,07  | 0,937222375 | -0,03 | 0,961281687 | -0,03 | 0,975441362 |
| Lrrc46 | 0,04  | 0,944309453 | -0,1  | 0,938711163 | -0,02 | 0,990836784 | -0,04 | 0,951803857 | -0,21 | 0,767526937 |
| Lrrc47 | -0,73 | 0,304022243 | -0,31 | 0,751116121 | -0,3  | 0,706584608 | 0,18  | 0,808985118 | -0,32 | 0,730289864 |
| Lrrc48 | -0,17 | 0,775183196 | 0,2   | 0,819631712 | 0,4   | 0,530318769 | -0,35 | 0,488775643 | -0,39 | 0,549181666 |
| Lrrc49 | -0,13 | 0,860985365 | 0,12  | 0,855632384 | 0,31  | 0,817818413 | 0     | 1           | 0,27  | 0,799495162 |
| Lrrc4b | -0,39 | 0,487185115 | -0,12 | 0,806456132 | -0,2  | 0,697383223 | -0,07 | 0,903744147 | 0,01  | 0,99584117  |
| Lrrc4c | 0,31  | 0,423859346 | 0,41  | 0,741939956 | -0,15 | 0,835677021 | -0,45 | 0,261796205 | -0,06 | 0,953297732 |
| Lrrc51 | 0,8   | 0,701627731 | -0,25 | 0,900801202 | -0,3  | 0,82104737  | -0,46 | 0,384870426 | -0,22 | 0,845218636 |
| Lrrc52 | 0,15  | 0,764824121 | -0,34 | 0,363298292 | 0,09  | 0,892560908 | 0,08  | 0,877053477 | 0,17  | 0,85508146  |
| Lrrc55 | -0,34 | 0,621070092 | -1,27 | 0,366674056 | 0,45  | 0,454034987 | 1,64  | 0,12170775  | -0,8  | 0,296552679 |
| Lrrc56 | -0,44 | 0,468471001 | 0,11  | 0,868234125 | 0,23  | 0,765783874 | -0,01 | 0,991436939 | -0,18 | 0,862867603 |
| Lrrc57 | -0,42 | 0,613990129 | -0,46 | 0,75247655  | -0,33 | 0,720590502 | -0,81 | 0,162932297 | -0,11 | 0,911780802 |
| Lrrc58 | -0,53 | 0,220541198 | -0,37 | 0,458770201 | 0,71  | 0,260479447 | 0,13  | 0,744503573 | -0,19 | 0,773244301 |
| Lrrc59 | -0,3  | 0,403765204 | -0,17 | 0,780313717 | 0,57  | 0,299010171 | 1,17  | 0,074829553 | -0,03 | 0,979152939 |
| Lrrc6  | 0,11  | 0,832696131 | -0,11 | 0,881113709 | 0,29  | 0,711472088 | 0,14  | 0,805722895 | -0,11 | 0,916410813 |
| Lrrc61 | -0,35 | 0,64211472  | -0,28 | 0,709432782 | 0,85  | 0,338719161 | -1,08 | 0,294345732 | -0,22 | 0,910829332 |
| Lrrc63 | 0,77  | 0,263040496 | 0,19  | 0,774758897 | 0,04  | 0,972847253 | 0,76  | 0,076821345 | 0,16  | 0,826279552 |
| Lrrc66 | 1,51  | 0,089458257 | 1,71  | 0,367968212 | -0,25 | 0,794194778 | 0,02  | 0,988205241 | 0,11  | 0,956702425 |

|            |       |             |       |             |       |             |       |             |       |             |
|------------|-------|-------------|-------|-------------|-------|-------------|-------|-------------|-------|-------------|
| Lrrc69     | 0,02  | 0,984692479 | 0,11  | 0,896619449 | 0,15  | 0,808065828 | 0,13  | 0,831764227 | 0,12  | 0,875090658 |
| Lrrc7      | 0,52  | 0,296031134 | 0,09  | 0,927205716 | 0,09  | 0,942112992 | 0,58  | 0,270661824 | 0,38  | 0,598277181 |
| Lrrc71     | 0,26  | 0,617280733 | 0,1   | 0,880048264 | -0,13 | 0,846975965 | -0,15 | 0,776545078 | 0,32  | 0,576909127 |
| Lrrc72     | 0,04  | 0,965444591 | -0,56 | 0,400515868 | -0,34 | 0,51127708  | -0,21 | 0,806497386 | -0,36 | 0,68987325  |
| Lrrc73     | -0,54 | 0,512916237 | 0,12  | 0,8227594   | -0,01 | 0,993379272 | 0,08  | 0,871925977 | -0,12 | 0,874716101 |
| Lrrc74a    | -0,05 | 0,949931783 | 0,36  | 0,723594605 | -0,43 | 0,533114844 | -0,11 | 0,744582932 | -0,24 | 0,706234455 |
| Lrrc74b    | 0,13  | 0,849091528 | 0,11  | 0,919602924 | 0,48  | 0,676693033 | -0,26 | 0,526586186 | 0,55  | 0,347614926 |
| Lrrc75a    | -0,52 | 0,42935185  | 0,03  | 0,980518468 | 0,29  | 0,640613239 | 0,07  | 0,910640253 | -0,11 | 0,920803929 |
| Lrrc75aos1 | 0,08  | 0,918524426 | -0,09 | 0,855974935 | -0,18 | 0,797272969 | -0,23 | 0,52714879  | -0,04 | 0,967747124 |
| Lrrc75aos2 | 0,19  | 0,91694318  | -0,19 | 0,932292974 | 0,33  | 0,785040228 | 0,78  | 0,043277241 | 0,66  | 0,207567334 |
| Lrrc75b    | -0,29 | 0,731752955 | 0,03  | 0,970622208 | -0,18 | 0,76370647  | -0,12 | 0,854971757 | 0,05  | 0,957289526 |
| Lrrc8a     | -0,17 | 0,714127381 | -0,27 | 0,619501651 | 0,07  | 0,912268947 | -0,66 | 0,059484256 | -0,62 | 0,145334207 |
| Lrrc8b     | -0,41 | 0,36631183  | -0,01 | 0,995205602 | 0,93  | 0,1819518   | 0,1   | 0,86288133  | -0,62 | 0,18346864  |
| Lrrc8c     | 0,24  | 0,641528055 | -0,1  | 0,840784209 | -0,32 | 0,572839142 | -0,12 | 0,742017028 | -0,52 | 0,258820768 |
| Lrrc8d     | 0,39  | 0,60879435  | 0,77  | 0,54867175  | 0,06  | 0,956228631 | -0,53 | 0,807101657 | 0,6   | 0,76521225  |
| Lrrc8e     | 0,13  | 0,787002876 | -0,15 | 0,808498635 | 0,28  | 0,732675311 | 0,14  | 0,69938772  | -0,11 | 0,876714296 |
| Lrrc9      | 0,14  | 0,869565514 | -0,17 | 0,906234611 | -0,08 | 0,94178334  | -0,24 | 0,832162054 | -0,49 | 0,673120647 |
| Lrrcc1     | -0,38 | 0,685826767 | -0,33 | 0,807175471 | -0,14 | 0,907130828 | -0,02 | 0,985633818 | -0,33 | 0,655657337 |
| Lrrd1      | 0,03  | 0,975341177 | -0,25 | 0,672585032 | -0,17 | 0,863964732 | -0,06 | 0,927873659 | -0,3  | 0,605542836 |
| Lrrfip1    | -0,13 | 0,846313357 | -0,29 | 0,621112051 | 0,55  | 0,327976309 | 0,6   | 0,098577249 | -0,14 | 0,865258929 |
| Lrrfip2    | -0,11 | 0,914090929 | -0,03 | 0,948048585 | -0,04 | 0,963578796 | 0,36  | 0,450579838 | -0,11 | 0,900126162 |
| Lrriq1     | 0,18  | 0,770632132 | -0,21 | 0,805949528 | -0,04 | 0,966497544 | -0,16 | 0,804420502 | -0,23 | 0,783400722 |
| Lrriq3     | 0,17  | 0,897717279 | -0,12 | 0,900801202 | -0,12 | 0,849423457 | -0,07 | 0,925176701 | -0,26 | 0,755982506 |
| Lrriq4     | -0,11 | 0,864526424 | 0,06  | 0,934294134 | 0,05  | 0,962216849 | 0,3   | 0,758588473 | 0,12  | 0,918288793 |
| Lrrk1      | 0,18  | 0,762798673 | 0,49  | 0,580257061 | 0,06  | 0,968742139 | -0,16 | 0,869234665 | -0,21 | 0,829444633 |
| Lrrk2      | 0,35  | 0,383063672 | 0,21  | 0,664787536 | -0,45 | 0,367248466 | 0,21  | 0,545828091 | -0,04 | 0,95985938  |
| Lrrn1      | 0,08  | 0,882443877 | -0,07 | 0,972842477 | 0,26  | 0,86306443  | 0,26  | 0,5859782   | 0,11  | 0,906338603 |
| Lrrn2      | 0,18  | 0,778115093 | -0,23 | 0,619501651 | -0,1  | 0,901410016 | -0,15 | 0,698459607 | 0,14  | 0,851637639 |
| Lrrn3      | 0,04  | 0,949241841 | 0,17  | 0,868912646 | 0,47  | 0,488218852 | -0,62 | 0,234549057 | -0,4  | 0,47756273  |
| Lrrn4      | 0,31  | 0,464825261 | 0,45  | 0,787375724 | -0,58 | 0,237014627 | -0,27 | 0,669509182 | 0,35  | 0,694233384 |
| Lrrn4cl    | -0,1  | 0,928944712 | 0,18  | 0,827141394 | -0,99 | 0,23620363  | -0,51 | 0,21914454  | -0,45 | 0,471919432 |
| Lrrtm1     | 0,24  | 0,774454651 | 0,07  | 0,936792848 | -0,15 | 0,885556448 | 0,14  | 0,804692486 | -0,09 | 0,928671864 |
| Lrrtm2     | 0,44  | 0,519823113 | 0,64  | 0,310156816 | -0,25 | 0,714796589 | 0,29  | 0,548815792 | 0,05  | 0,962442464 |
| Lrrtm3     | 0,1   | 0,868323271 | -0,28 | 0,604885401 | -0,04 | 0,950373996 | -0,05 | 0,943143586 | 0,46  | 0,550083777 |
| Lrrtm4     | 0,32  | 0,61932158  | 0,2   | 0,857503073 | -0,03 | 0,983927487 | 0,03  | 0,948017317 | -0,04 | 0,97425848  |



|        |       |             |       |             |       |             |       |             |       |             |
|--------|-------|-------------|-------|-------------|-------|-------------|-------|-------------|-------|-------------|
| Lrsam1 | 0,04  | 0,963251036 | 0,13  | 0,839789639 | -0,49 | 0,48646529  | -0,57 | 0,406031453 | -0,71 | 0,395349481 |
| Lrtm1  | 0,15  | 0,757239936 | -0,18 | 0,786190103 | -0,26 | 0,701392397 | 0,09  | 0,885417869 | 0,08  | 0,934564591 |
| Lrtm2  | -0,38 | 0,648017341 | -0,37 | 0,758387553 | -0,66 | 0,299796539 | 0,29  | 0,677265557 | -0,21 | 0,842425914 |
| Lrwd1  | -0,31 | 0,537580268 | 0,09  | 0,896322235 | 0,47  | 0,51305312  | -0,26 | 0,553561746 | -0,09 | 0,921903839 |
| Lsamp  | 0,21  | 0,687662951 | -0,36 | 0,7219659   | 0,07  | 0,959437564 | 0,68  | 0,361276702 | 0,16  | 0,892912029 |
| Lsg1   | -0,35 | 0,54401985  | -0,55 | 0,263655099 | 0,51  | 0,588145967 | 1,08  | 0,161548806 | 0,53  | 0,600332767 |
| Lsm1   | -0,11 | 0,895701154 | 0,58  | 0,65712281  | 0,67  | 0,179552168 | -0,39 | 0,597834482 | 0,24  | 0,765340194 |
| Lsm10  | 0,35  | 0,490731724 | 0,11  | 0,873446866 | -0,07 | 0,943170329 | 0,05  | 0,932312961 | 0,02  | 0,983613958 |
| Lsm11  | -0,17 | 0,847851162 | -0,27 | 0,815317911 | 0,35  | 0,775163644 | 1,25  | 0,17854439  | 0,17  | 0,863496792 |
| Lsm12  | -0,37 | 0,463413237 | -0,19 | 0,657157409 | 0,25  | 0,657277431 | 1,15  | 0,203580306 | 0,56  | 0,571269331 |
| Lsm14a | 0,02  | 0,982213914 | 0,05  | 0,934294134 | 0,13  | 0,864411302 | 0,46  | 0,20872372  | 0,27  | 0,633381473 |
| Lsm14b | -0,81 | 0,194005514 | 0,83  | 0,302028989 | 0,4   | 0,744899116 | -0,14 | 0,861959213 | -0,77 | 0,228482976 |
| Lsm2   | 0,01  | 0,99070902  | -0,19 | 0,80097084  | 1,49  | 0,103030088 | 0,42  | 0,525719232 | 0,33  | 0,739851808 |
| Lsm3   | -0,12 | 0,803761785 | -0,55 | 0,302028989 | 0,43  | 0,466420725 | 0,68  | 0,135169704 | -0,13 | 0,869403669 |
| Lsm4   | -0,18 | 0,695084032 | -0,4  | 0,318798133 | 0,57  | 0,501664412 | 0,48  | 0,140865327 | 0,2   | 0,716979399 |
| Lsm5   | -0,67 | 0,205216327 | -0,38 | 0,796752633 | 0,16  | 0,925417014 | -0,26 | 0,844720784 | -0,16 | 0,952299975 |
| Lsm6   | 0,03  | 0,970286316 | -0,45 | 0,401278819 | 0,57  | 0,187534349 | 1,09  | 0,057764635 | 0,15  | 0,85938715  |
| Lsm7   | -0,39 | 0,491560172 | -0,32 | 0,624712123 | 0,57  | 0,332905005 | 0,69  | 0,187952931 | 0,12  | 0,915356549 |
| Lsm8   | -0,06 | 0,933253663 | -0,58 | 0,328961681 | 0,38  | 0,641775458 | 0,47  | 0,215266447 | 0,14  | 0,85041485  |
| Lsmem1 | 0,27  | 0,842504427 | -0,01 | 0,998373906 | 0,3   | 0,770526999 | -0,2  | 0,869771015 | -0,34 | 0,827032122 |
| Lsmem2 | 0,12  | 0,862908528 | 0,06  | 0,935329426 | -0,39 | 0,382094129 | -0,35 | 0,336030238 | 0,08  | 0,932268703 |
| Lsp1   | 0,02  | 0,985200676 | -0,02 | 0,98230594  | -0,64 | 0,507044794 | -0,56 | 0,458795275 | -0,22 | 0,847511509 |
| Lsr    | -0,27 | 0,758636946 | -0,54 | 0,700297886 | 0,68  | 0,456109035 | -2,69 | 0,035685356 | -0,2  | 0,910829332 |
| Lss    | -0,8  | 0,10507346  | -0,21 | 0,897840727 | 0,15  | 0,887630371 | 0,21  | 0,919668684 | 0,25  | 0,928764431 |
| Lst1   | 0,27  | 0,627871311 | -0,46 | 0,729741948 | 0,26  | 0,894018349 | 0,48  | 0,288183343 | -0,14 | 0,890460628 |
| Lta    | 0,21  | 0,821550711 | 0,18  | 0,768495353 | -0,05 | 0,953622038 | 0,01  | 0,991453278 | -0,1  | 0,928063484 |
| Lta4h  | -0,53 | 0,319628888 | -1    | 0,107449087 | -0,21 | 0,80434067  | 0,56  | 0,181651374 | -0,57 | 0,35982462  |
| Ltb    | -0,09 | 0,911158473 | -0,11 | 0,820851855 | -0,26 | 0,868609956 | -0,1  | 0,870113725 | -0,2  | 0,765809384 |
| Ltb4r1 | -0,1  | 0,898783715 | -0,25 | 0,678666996 | 0,44  | 0,525988514 | 0,02  | 0,991962381 | -0,15 | 0,901218139 |
| Ltb4r2 | 0,01  | 0,990894139 | -0,07 | 0,896187678 | -0,29 | 0,530318769 | 0,13  | 0,701167068 | 0,14  | 0,816150205 |
| Ltbp1  | -0,19 | 0,865776054 | -0,14 | 0,912535732 | 0,04  | 0,979791644 | -4,12 | 0,006048812 | -1,38 | 0,058814936 |
| Ltbp2  | -0,61 | 0,341853862 | 0,21  | 0,838368852 | 0,06  | 0,951601163 | -0,39 | 0,563291303 | -0,32 | 0,724432778 |
| Ltbp3  | -0,48 | 0,410498707 | -0,2  | 0,84526289  | 0,73  | 0,116395149 | -1,49 | 0,011041643 | -0,95 | 0,087632866 |
| Ltbp4  | -0,64 | 0,226007645 | -0,41 | 0,424175253 | 0,52  | 0,256671265 | -2,08 | 0,004331967 | -1,38 | 0,028812573 |
| Ltbr   | -0,12 | 0,895400682 | -0,09 | 0,945143056 | 0,29  | 0,688126003 | -0,05 | 0,959450564 | -0,15 | 0,862867603 |

|         |       |             |       |             |       |             |       |             |       |             |
|---------|-------|-------------|-------|-------------|-------|-------------|-------|-------------|-------|-------------|
| Ltc4s   | -0,35 | 0,671254269 | -0,6  | 0,302845725 | 0,46  | 0,472273933 | -0,58 | 0,204370449 | -0,51 | 0,480219093 |
| Ltf     | 0,33  | 0,720829271 | 0,03  | 0,975959817 | -0,01 | 0,993379272 | -1,93 | 0,084083957 | -0,51 | 0,788112596 |
| Ltk     | -0,14 | 0,908513949 | 0,07  | 0,897322302 | 0,09  | 0,889818596 | -0,18 | 0,611289904 | 0,16  | 0,859686493 |
| Ltn1    | -0,2  | 0,753095011 | -0,16 | 0,716070721 | 0,1   | 0,911634383 | 0,18  | 0,865727381 | 0,15  | 0,912250982 |
| Ltv1    | -0,22 | 0,622436248 | -0,57 | 0,472042875 | 0,68  | 0,206505714 | 0,65  | 0,228083123 | 0,76  | 0,169601895 |
| Luc7l   | 0,41  | 0,436086286 | 0     | 1           | 0,16  | 0,856939356 | -0,07 | 0,954910308 | -0,18 | 0,864049783 |
| Luc7l2  | 0,3   | 0,768809729 | 0,6   | 0,242981491 | -0,09 | 0,912268947 | -0,57 | 0,550972752 | 0,23  | 0,865258929 |
| Luc7l3  | 0,39  | 0,469692532 | 0,63  | 0,205408853 | -0,4  | 0,444372412 | -0,65 | 0,184597871 | 0,8   | 0,129622833 |
| Lum     | -0,01 | 0,99276206  | -0,03 | 0,972205219 | 0,02  | 0,989491273 | -0,37 | 0,327964233 | -0,09 | 0,912250982 |
| Lurap1  | -0,14 | 0,787452068 | 0,2   | 0,733988597 | -0,4  | 0,541296354 | -1,45 | 0,023333718 | -0,33 | 0,552131339 |
| Lurap1l | -1,7  | 0,030200792 | -0,65 | 0,572942783 | 1,32  | 0,036818657 | -1,07 | 0,077269482 | -1,53 | 0,021590478 |
| Luzp1   | -0,09 | 0,840909921 | -0,08 | 0,86411353  | -0,04 | 0,973802765 | -0,37 | 0,337075841 | 0,15  | 0,811975973 |
| Luzp2   | -0,47 | 0,36240006  | 0,12  | 0,855474571 | 0,1   | 0,878636183 | 0,08  | 0,889515057 | -0,14 | 0,866966085 |
| Luzp4   | 0,06  | 0,959443704 | -0,33 | 0,916822926 | -0,18 | 0,848462153 | -0,38 | 0,264097924 | 0,17  | 0,793839436 |
| Lvrn    | -0,24 | 0,663149809 | 0,17  | 0,907823694 | -0,36 | 0,477258573 | 0,05  | 0,963344096 | 0,07  | 0,932268703 |
| Lxn     | -0,56 | 0,165137501 | -0,46 | 0,306222851 | 0,71  | 0,22402215  | 2,13  | 0,005660788 | -0,15 | 0,86811326  |
| Ly6a    | 0,76  | 0,237786455 | 0,46  | 0,271040583 | -1,47 | 0,00376304  | -0,23 | 0,497194901 | 0,54  | 0,20189387  |
| Ly6c1   | 1,73  | 0,051263109 | 1     | 0,152288785 | -2,3  | 0,038925327 | -1,77 | 0,008574928 | 0,54  | 0,25854927  |
| Ly6c2   | 0,69  | 0,151609009 | 0,87  | 0,14311743  | -2,02 | 0,004621866 | -0,48 | 0,210921001 | 0,85  | 0,070521049 |
| Ly6d    | 0,33  | 0,40470849  | -0,07 | 0,893262563 | -0,01 | 0,990836784 | -0,26 | 0,499512231 | -0,41 | 0,449136429 |
| Ly6e    | 0,42  | 0,412606459 | 0,34  | 0,508633526 | -0,75 | 0,080523802 | -0,73 | 0,046695677 | 0,05  | 0,951973727 |
| Ly6f    | 1,04  | 0,249194174 | 0,11  | 0,807674009 | -0,45 | 0,570233796 | 0,2   | 0,841354324 | 0,01  | 0,991628025 |
| Ly6g    | 0,23  | 0,692490424 | 0,09  | 0,842663656 | 0,24  | 0,805783058 | -0,21 | 0,529804709 | 0,04  | 0,967314981 |
| Ly6g5b  | 1,39  | 0,135369075 | -0,27 | 0,51825831  | -0,03 | 0,988640659 | 0,28  | 0,696772872 | -0,17 | 0,905581898 |
| Ly6g5c  | 0,22  | 0,840727772 | 0,14  | 0,917623085 | 0,29  | 0,746570045 | -0,16 | 0,799055674 | 0,35  | 0,590339443 |
| Ly6g6c  | -0,54 | 0,534294872 | -0,3  | 0,786405071 | 0,35  | 0,707539555 | 0,09  | 0,907406741 | 0,14  | 0,927536545 |
| Ly6g6d  | -0,2  | 0,688025638 | 0,2   | 0,781046971 | 0     | 0,997598048 | -0,09 | 0,898801714 | 0,36  | 0,623304657 |
| Ly6g6e  | -0,29 | 0,744242499 | 0,11  | 0,881113709 | 0,34  | 0,709846532 | 0,21  | 0,691718699 | 0,02  | 0,982816728 |
| Ly6g6f  | -0,53 | 0,268855987 | 0,34  | 0,656204868 | -0,03 | 0,977897176 | -0,15 | 0,776825077 | -0,22 | 0,745134899 |
| Ly6h    | 0,16  | 0,736648392 | -0,08 | 0,873640843 | -0,17 | 0,911634383 | -0,02 | 0,984930182 | -0,05 | 0,969617491 |
| Ly6i    | 0,8   | 0,263252718 | 0,99  | 0,296331627 | -0,49 | 0,638615938 | -1,55 | 0,182485182 | 0,05  | 0,984125319 |
| Ly6k    | 0,05  | 0,963042636 | -0,04 | 0,950718597 | -0,12 | 0,9030272   | -0,11 | 0,855218474 | 0,06  | 0,957434767 |
| Ly75    | 0,56  | 0,761973282 | 1,34  | 0,154679948 | 0,59  | 0,674253263 | 0,22  | 0,626884812 | 1,28  | 0,025410853 |
| Ly86    | -0,07 | 0,922118639 | -0,21 | 0,808498635 | -0,38 | 0,562334029 | 0,06  | 0,967405057 | -0,07 | 0,956610289 |
| Ly9     | -0,42 | 0,474293292 | -0,03 | 0,993789602 | 0,89  | 0,411161502 | -0,32 | 0,543829463 | 0,05  | 0,97683359  |

|         |       |             |       |             |       |             |       |             |       |             |
|---------|-------|-------------|-------|-------------|-------|-------------|-------|-------------|-------|-------------|
| Ly96    | 0,96  | 0,089531229 | 0,46  | 0,641052915 | 0,25  | 0,891950104 | 0,46  | 0,487754875 | 0,53  | 0,593298551 |
| Lyar    | -0,52 | 0,279256257 | -0,61 | 0,224596043 | 0,51  | 0,598019827 | 0,82  | 0,344978832 | 0,55  | 0,545134155 |
| Lyg1    | -0,11 | 0,920894214 | 0,27  | 0,854999866 | -0,28 | 0,727262258 | 0,16  | 0,639108834 | 0,35  | 0,641392367 |
| Lyg2    | 0,22  | 0,652819827 | -0,01 | 0,997700959 | -0,14 | 0,818494503 | 0,07  | 0,927265002 | 0,34  | 0,608072805 |
| Lyl1    | 0,29  | 0,468284568 | 0,04  | 0,972505904 | 0,28  | 0,713620433 | -0,78 | 0,386708141 | -0,34 | 0,786813214 |
| Lyn     | -0,24 | 0,59710379  | -0,19 | 0,691433995 | 0,47  | 0,747599709 | 0,44  | 0,167217955 | 0,24  | 0,677222415 |
| Lynx1   | -0,26 | 0,836559066 | -0,07 | 0,928800127 | 0,18  | 0,845321518 | -1,67 | 0,009959417 | -0,56 | 0,503378313 |
| Lypd1   | -0,15 | 0,909164786 | -0,16 | 0,809960135 | 0,11  | 0,887424125 | -0,24 | 0,62344204  | -0,2  | 0,754511071 |
| Lypd2   | 0,28  | 0,666297306 | -0,11 | 0,892238841 | -0,02 | 0,991562229 | -0,24 | 0,646776742 | -0,18 | 0,864163536 |
| Lypd3   | -0,17 | 0,705457389 | -0,15 | 0,774278866 | -0,16 | 0,861307315 | 0,46  | 0,394939896 | 0,15  | 0,871038748 |
| Lypd4   | 0,29  | 0,783200207 | 0,61  | 0,480808447 | 0,15  | 0,822469408 | 0,14  | 0,817367025 | 0,49  | 0,42047199  |
| Lypd5   | 0,04  | 0,963378584 | -0,57 | 0,612645853 | -0,34 | 0,618146048 | 0,47  | 0,532243296 | -0,19 | 0,884247878 |
| Lypd6   | 0,61  | 0,20880573  | -0,08 | 0,947684955 | -0,2  | 0,823823322 | -2,12 | 0,005771813 | 0,39  | 0,587915673 |
| Lypd6b  | 0,2   | 0,739638841 | -0,08 | 0,943713379 | -0,42 | 0,382532767 | 0,65  | 0,11232717  | 0,37  | 0,669276243 |
| Lypd8   | 0,24  | 0,801386084 | 0,07  | 0,970432192 | -0,31 | 0,544756897 | 0,05  | 0,949833142 | 0,02  | 0,98847659  |
| Lypla1  | -0,2  | 0,707480624 | -0,35 | 0,386064253 | 0,04  | 0,972847253 | 0,78  | 0,31311799  | 0,07  | 0,961406182 |
| Lypla2  | -0,49 | 0,209270108 | -0,32 | 0,665318121 | 0,22  | 0,715386906 | 0,74  | 0,143104121 | -0,32 | 0,508032539 |
| Lypla11 | -0,36 | 0,481677041 | -0,19 | 0,864029868 | 0,15  | 0,840187016 | 0,07  | 0,904971257 | -0,31 | 0,702558142 |
| Lyrm1   | 0,11  | 0,897820028 | -0,21 | 0,782652703 | -0,62 | 0,557268968 | -0,19 | 0,718193921 | -0,75 | 0,214056891 |
| Lyrm2   | 0,53  | 0,277154156 | -0,05 | 0,961370411 | 0,04  | 0,979791644 | -0,5  | 0,2423686   | 0,09  | 0,939366278 |
| Lyrm4   | -0,12 | 0,852358078 | -0,46 | 0,582478031 | 0,11  | 0,940550094 | 0,01  | 0,998710655 | -0,3  | 0,835191    |
| Lyrm5   | -0,26 | 0,687662951 | -0,43 | 0,489239002 | 0,13  | 0,909233941 | -0,41 | 0,739379959 | -0,42 | 0,816435488 |
| Lyrm7   | 0,52  | 0,239601221 | -0,09 | 0,97291119  | -0,57 | 0,533114844 | 0     | 1           | 0,54  | 0,268016026 |
| Lyrm7os | 0,09  | 0,907748757 | 0,05  | 0,912535732 | 0,05  | 0,940213182 | 0,14  | 0,785542984 | 0,03  | 0,974447247 |
| Lyrm9   | 0,36  | 0,363136841 | -0,13 | 0,810875398 | -0,1  | 0,872900604 | 0,32  | 0,665832473 | 0,3   | 0,830415283 |
| Lysmd1  | -0,31 | 0,84900712  | 0,66  | 0,254708337 | 0,59  | 0,628978443 | -0,34 | 0,718237629 | -0,3  | 0,817914157 |
| Lysmd2  | 0,31  | 0,54401985  | 0,73  | 0,370515616 | -0,56 | 0,34019912  | 0,7   | 0,350800181 | 0,69  | 0,166595171 |
| Lysmd3  | -0,49 | 0,734646609 | 0,28  | 0,793839039 | 0,09  | 0,923135714 | 0,65  | 0,391671251 | 0,34  | 0,725971032 |
| Lysmd4  | 0     | 0,998017023 | 0,02  | 0,974159037 | 0,08  | 0,914134206 | 0,3   | 0,660110505 | 0,01  | 0,994265717 |
| Lyst    | -0,11 | 0,894895846 | 0,39  | 0,537678815 | -0,1  | 0,914134206 | -0,36 | 0,438502869 | 0,34  | 0,520948388 |
| Lyve1   | -0,54 | 0,759465813 | -0,31 | 0,764672565 | -0,13 | 0,910160525 | -0,04 | 0,94973618  | -1,86 | 0,018434004 |
| Lyz1    | 0,2   | 0,832696131 | -0,29 | 0,664710351 | -0,27 | 0,697383223 | 0,36  | 0,478731976 | 0,39  | 0,634425115 |
| Lyz2    | -0,25 | 0,932531737 | -2,7  | 0,040620931 | 0,64  | 0,722149463 | 1,73  | 0,008325129 | -1,04 | 0,375432346 |
| Lyzl1   | -0,09 | 0,937251448 | 0,67  | 0,392755621 | -0,07 | 0,928977744 | 0,06  | 0,919668684 | -0,03 | 0,980945466 |
| Lyzl4   | 0,24  | 0,632053719 | 0,05  | 0,922506046 | -0,08 | 0,923350407 | 0,05  | 0,952646353 | -0,01 | 0,989179767 |

|               |       |             |       |             |       |             |       |             |       |             |
|---------------|-------|-------------|-------|-------------|-------|-------------|-------|-------------|-------|-------------|
| Lyzl4os       | -0,36 | 0,731173847 | 0,04  | 0,958314419 | -0,06 | 0,953070914 | 0,17  | 0,80049982  | -0,36 | 0,718299139 |
| Lyzl6         | 0,15  | 0,791021845 | -0,1  | 0,940269529 | -0,31 | 0,607398568 | 0,2   | 0,787778344 | 0,35  | 0,654016085 |
| Lzic          | -0,24 | 0,759235099 | -0,14 | 0,910688765 | 0,79  | 0,271482188 | 0,46  | 0,516439928 | 0     | 0,997053874 |
| Lztlf1        | -0,4  | 0,488733161 | -0,35 | 0,485712513 | -0,37 | 0,82622365  | 0,83  | 0,325397016 | -0,28 | 0,771772186 |
| Lztr1         | 0,08  | 0,910211895 | -0,14 | 0,74717977  | -0,22 | 0,751758339 | 0,51  | 0,19695418  | -0,25 | 0,699060093 |
| Lzts1         | -0,4  | 0,364497258 | 0,32  | 0,547152183 | -0,07 | 0,939684708 | 0,28  | 0,707902199 | 0,25  | 0,736140152 |
| Lzts2         | 0,15  | 0,781662737 | 0,05  | 0,965147491 | -0,23 | 0,637321546 | -0,27 | 0,662587743 | 0,23  | 0,814438115 |
| Lzts3         | 0,21  | 0,705404186 | -0,03 | 0,963791015 | -0,19 | 0,845321518 | -0,21 | 0,823059684 | 0,12  | 0,90569569  |
| M1ap          | 0,02  | 0,984747015 | 0     | 1           | 0,03  | 0,968067891 | 0,01  | 0,988205241 | 0,03  | 0,981509403 |
| M5C1000I18Rik | 0,11  | 0,9231839   | 0,07  | 0,911289505 | -0,46 | 0,460914763 | 0,37  | 0,306779191 | 0,21  | 0,820657685 |
| M6pr          | -0,4  | 0,26418498  | 0,03  | 0,975765252 | 0,16  | 0,777810365 | -0,22 | 0,615320175 | 0,11  | 0,893786534 |
| Maats1        | -0,37 | 0,314547808 | 0,22  | 0,81976908  | 0     | 0,997581017 | -0,02 | 0,984136649 | -0,25 | 0,69063878  |
| Mab2111       | 0,44  | 0,553764503 | 0,14  | 0,867265251 | -0,22 | 0,806941936 | 0,12  | 0,736730464 | 0,16  | 0,823098095 |
| Mab2112       | -0,36 | 0,671277626 | 0,01  | 0,994486533 | -0,02 | 0,990836784 | 0,07  | 0,874701048 | -0,37 | 0,476763678 |
| Mab2113       | 0,41  | 0,391793671 | 0,71  | 0,214682893 | 0,29  | 0,638614862 | -0,05 | 0,921731995 | 0,37  | 0,593308151 |
| Macc1         | 0,34  | 0,471980619 | -0,16 | 0,855321685 | 1,22  | 0,138770182 | 0,71  | 0,399678653 | 0,39  | 0,576777161 |
| Macf1         | -0,5  | 0,253120234 | -0,44 | 0,41028104  | -0,06 | 0,953917674 | -0,43 | 0,235558038 | -0,41 | 0,345758493 |
| Macrocl1      | -0,3  | 0,74672311  | -0,15 | 0,844500324 | -0,16 | 0,868609956 | -0,48 | 0,397797098 | -0,77 | 0,358300153 |
| Macrocl2      | 0,16  | 0,893283341 | 0     | 0,999395995 | -0,19 | 0,770526999 | -0,18 | 0,719996396 | 0,39  | 0,651690564 |
| Macrocl2os1   | 0,26  | 0,750634506 | 0,26  | 0,539367312 | -0,46 | 0,600679499 | 0,06  | 0,929119795 | 0,15  | 0,874829878 |
| Macrocl2os2   | 0,41  | 0,391196608 | -0,23 | 0,605851161 | -0,04 | 0,963199274 | 0,33  | 0,478731976 | -0,14 | 0,864166878 |
| Mad111        | -0,31 | 0,460103183 | -0,27 | 0,649067803 | 0,25  | 0,763358003 | 0,38  | 0,378909326 | -0,5  | 0,482921656 |
| Mad211        | -1,09 | 0,241810075 | -1,71 | 0,095493366 | 1,59  | 0,027210542 | 2,62  | 0,026972102 | 0,7   | 0,46391899  |
| Mad211bp      | 0,09  | 0,946792769 | 0,46  | 0,794404033 | -0,26 | 0,700185713 | -0,64 | 0,652870934 | 0,08  | 0,956610289 |
| Mad212        | 0,62  | 0,139999287 | 0,3   | 0,565914475 | 0,38  | 0,714397348 | 0,67  | 0,08634305  | 0,72  | 0,158709655 |
| Madcam1       | 0,19  | 0,721378796 | -0,49 | 0,437548809 | 0,34  | 0,836625711 | 0,56  | 0,533449403 | 0,02  | 0,988077165 |
| Madd          | -0,67 | 0,434264464 | 0     | 1           | 0,17  | 0,901410016 | -0,5  | 0,450450069 | -0,3  | 0,724669859 |
| Maea          | 0,12  | 0,835246093 | 0,05  | 0,928134372 | 0,34  | 0,562169896 | 0,03  | 0,945195883 | 0,09  | 0,918529364 |
| Mael          | 0,18  | 0,815332681 | -0,35 | 0,487097639 | 0,23  | 0,736422567 | 0,22  | 0,624964632 | 0     | 0,998332822 |
| Maf           | -0,12 | 0,914801568 | -0,08 | 0,948597122 | -0,1  | 0,909126689 | -1,09 | 0,170042896 | 0,13  | 0,921989133 |
| Maf1          | -0,05 | 0,944652244 | 0,14  | 0,847821325 | -0,16 | 0,805444672 | -0,04 | 0,92973608  | -0,07 | 0,946463658 |
| Mafa          | -0,03 | 0,96263856  | -0,26 | 0,670644394 | -0,27 | 0,689570537 | 0,18  | 0,64384513  | -0,02 | 0,985269236 |
| Mafb          | -0,41 | 0,511497074 | 0,1   | 0,928565454 | -0,03 | 0,980713449 | -0,25 | 0,478063188 | 0,26  | 0,694233384 |
| Maff          | -0,05 | 0,948926586 | -0,11 | 0,937424389 | -0,06 | 0,965320334 | -0,12 | 0,835214439 | 0,51  | 0,362275161 |
| Mafg          | -0,17 | 0,713441163 | -0,09 | 0,847821325 | -0,06 | 0,937346852 | 0,23  | 0,630514597 | 0,23  | 0,733820456 |

|             |       |             |       |             |       |             |       |             |       |             |
|-------------|-------|-------------|-------|-------------|-------|-------------|-------|-------------|-------|-------------|
| Mafk        | 0,31  | 0,559760851 | 0,71  | 0,138647411 | -0,58 | 0,323841427 | -0,52 | 0,267486273 | 0,47  | 0,396784086 |
| Mag         | 0,11  | 0,814333906 | -0,34 | 0,438764825 | -0,09 | 0,922318683 | 0,38  | 0,287840988 | -0,21 | 0,782133957 |
| Magea1      | 0,22  | 0,630133896 | 0,07  | 0,927205716 | -0,23 | 0,720069267 | -0,1  | 0,920640884 | -0,19 | 0,864540232 |
| Magea10     | -0,16 | 0,789385646 | 0     | 0,999395995 | 0,1   | 0,890710011 | 0,11  | 0,825991201 | 0,1   | 0,912733818 |
| Magea2      | -0,04 | 0,950897622 | 0,01  | 0,995590426 | 0,01  | 0,994218677 | 0,16  | 0,701481618 | 0,09  | 0,91398047  |
| Magea4      | 0,19  | 0,66317593  | -0,15 | 0,752804236 | 0     | 0,999931921 | -0,12 | 0,746721547 | -0,19 | 0,792404969 |
| Magea5      | 0,55  | 0,550911539 | -0,16 | 0,855702031 | 0,24  | 0,801755243 | 0,11  | 0,819132612 | 0,38  | 0,432621109 |
| Magea6      | 0,24  | 0,682117535 | 0,27  | 0,670859269 | -0,12 | 0,849954163 | -0,26 | 0,536344767 | -0,31 | 0,592505698 |
| Magea8      | 0,33  | 0,645258762 | -0,26 | 0,693801781 | -0,04 | 0,970969012 | 0,25  | 0,713874618 | 0,27  | 0,78960943  |
| Mageb1      | -0,24 | 0,559760851 | 0,23  | 0,716661568 | -0,28 | 0,570755021 | -0,06 | 0,898285908 | 0,03  | 0,97425848  |
| Mageb16     | -0,08 | 0,899795754 | 0,03  | 0,985764487 | 0,1   | 0,904573436 | -0,11 | 0,924492971 | 0,01  | 0,991628025 |
| Mageb16-ps1 | -0,19 | 0,690033642 | 0,13  | 0,796482292 | -0,14 | 0,860844298 | 0     | 1           | -0,03 | 0,974924379 |
| Mageb17-ps  | 0,15  | 0,795659022 | 0,02  | 0,970832543 | -0,18 | 0,730814266 | -0,06 | 0,871891256 | 0,02  | 0,983613958 |
| Mageb18     | 0,1   | 0,895031891 | 0,21  | 0,832369851 | -0,06 | 0,946842192 | 0,52  | 0,166994743 | 0,31  | 0,653769438 |
| Mageb3      | 0,17  | 0,740529913 | 0,06  | 0,896890904 | -0,23 | 0,797422121 | -0,45 | 0,435349283 | 0,02  | 0,984638538 |
| Mageb4      | 0,58  | 0,376151377 | -0,55 | 0,482501854 | -0,23 | 0,777810365 | 0     | 0,998526865 | -0,27 | 0,76521225  |
| Maged1      | -0,49 | 0,305876807 | -0,74 | 0,203778449 | 1,05  | 0,041414494 | 1,48  | 0,016045674 | -0,48 | 0,375162254 |
| Maged2      | -0,54 | 0,301896345 | -0,29 | 0,543900329 | 0,29  | 0,798320169 | 0,37  | 0,665234661 | -0,37 | 0,720844381 |
| Magee1      | -1,29 | 0,053789028 | -0,11 | 0,817437045 | 0,2   | 0,82162081  | -0,41 | 0,471583673 | -0,18 | 0,82823489  |
| Magee2      | 0,35  | 0,53686867  | -0,47 | 0,684726882 | -0,16 | 0,835677021 | 0,04  | 0,935460611 | 0,1   | 0,915356549 |
| Mageh1      | -0,34 | 0,474293292 | 0,05  | 0,95121799  | 0,17  | 0,891500876 | -0,12 | 0,798957117 | -0,22 | 0,797575387 |
| Magel2      | -0,19 | 0,758636946 | 0,15  | 0,732044571 | -0,35 | 0,533801593 | -0,2  | 0,617807402 | 0,1   | 0,928724353 |
| Magi1       | -0,29 | 0,557114011 | -0,04 | 0,955382206 | 0,29  | 0,720069267 | 1,6   | 0,019602745 | 0     | 0,997876986 |
| Magi2       | -0,1  | 0,89763852  | 0,04  | 0,945864283 | -0,12 | 0,918291931 | -0,28 | 0,530022008 | 0,15  | 0,865258929 |
| Magi3       | -0,51 | 0,338531311 | -0,55 | 0,320811625 | 0,6   | 0,360938823 | 0,06  | 0,928203787 | -0,4  | 0,456658287 |
| Magix       | -1,03 | 0,278121865 | -1,16 | 0,582976316 | 0,04  | 0,973006385 | -0,93 | 0,353607513 | -0,87 | 0,160155445 |
| Magoh       | 0,39  | 0,42677652  | -0,21 | 0,630199793 | 0,59  | 0,239457838 | 0,39  | 0,2422298   | 0,19  | 0,765809384 |
| Magohb      | -0,85 | 0,180356049 | -0,62 | 0,467769742 | 0,75  | 0,137340423 | 0,62  | 0,226286594 | 0,34  | 0,712121015 |
| Magt1       | 0,19  | 0,81313264  | 0,16  | 0,870103107 | 0,21  | 0,777918093 | 0,11  | 0,910224082 | 0,55  | 0,471919432 |
| Mak         | 0,24  | 0,779920475 | 0,11  | 0,900801202 | -0,26 | 0,670926345 | -0,04 | 0,943938445 | -0,2  | 0,820234867 |
| Mak16       | -0,22 | 0,59710379  | -0,19 | 0,833259177 | 0,08  | 0,941627748 | 0,41  | 0,471723559 | 0,1   | 0,917844354 |
| Mal         | -0,32 | 0,706274249 | -0,45 | 0,629788821 | 0,22  | 0,844493581 | -5,95 | 0,001139257 | -0,55 | 0,240119674 |
| Mal2        | -0,11 | 0,829198831 | -0,23 | 0,605302626 | -0,25 | 0,613380041 | -0,03 | 0,967866794 | -0,53 | 0,373699539 |
| Malat1      | 0,14  | 0,722348441 | 0,11  | 0,838339231 | -0,22 | 0,720069267 | -0,64 | 0,118283887 | -0,06 | 0,946407638 |
| Mall        | -0,37 | 0,364497258 | -0,88 | 0,158696948 | -0,27 | 0,613380041 | 0,58  | 0,16109175  | -0,1  | 0,939127163 |

|          |       |             |       |             |       |             |       |             |       |             |
|----------|-------|-------------|-------|-------------|-------|-------------|-------|-------------|-------|-------------|
| Malsu1   | 0,27  | 0,764288636 | 0,23  | 0,810635763 | -0,12 | 0,830541787 | -0,47 | 0,275935167 | 0,08  | 0,92519473  |
| Malt1    | 0,48  | 0,580512951 | 0,54  | 0,563431484 | -0,33 | 0,50620307  | 0,48  | 0,564693464 | 0,09  | 0,947257087 |
| Mamdc2   | -0,26 | 0,638590242 | 0,33  | 0,61193546  | -0,27 | 0,750624323 | -0,96 | 0,339455217 | -0,57 | 0,608004947 |
| Mamdc4   | 0,16  | 0,803737003 | -0,5  | 0,223537    | 0,22  | 0,737241227 | -0,08 | 0,856710718 | -0,05 | 0,952718905 |
| Maml1    | -0,14 | 0,752808308 | 0,11  | 0,847885195 | 0,14  | 0,780528725 | 0,27  | 0,468693823 | -0,22 | 0,738853855 |
| Maml2    | 0,22  | 0,728739942 | 0,36  | 0,531549911 | -0,33 | 0,570233796 | -0,33 | 0,555857861 | 0,33  | 0,572463557 |
| Maml3    | 0,4   | 0,61200942  | 0,05  | 0,962980292 | 0,09  | 0,904057901 | 0,65  | 0,452937584 | -0,22 | 0,858867218 |
| Mamld1   | -1,13 | 0,178589155 | -0,49 | 0,460480331 | 0,3   | 0,626880983 | 0,86  | 0,062732483 | -0,62 | 0,360726287 |
| Mamstr   | 0,38  | 0,499126457 | 0,68  | 0,274811602 | -0,06 | 0,970671866 | -0,51 | 0,164734522 | -0,17 | 0,890957032 |
| Man1a    | -0,12 | 0,803761785 | 0,02  | 0,967833514 | 0,52  | 0,43825018  | 1,38  | 0,064362547 | 0,14  | 0,900126162 |
| Man1a2   | -0,69 | 0,321600657 | -0,05 | 0,926353869 | 0,06  | 0,944376323 | 0,26  | 0,522511755 | 0,34  | 0,593213101 |
| Man1b1   | -0,11 | 0,882060783 | -0,15 | 0,748874675 | 0,38  | 0,463820273 | 0,14  | 0,750780744 | -0,28 | 0,598234808 |
| Man1c1   | -0,44 | 0,244269955 | -0,9  | 0,143690114 | 0,16  | 0,906747817 | 0,33  | 0,718237629 | -0,15 | 0,906338603 |
| Man2a1   | 0,22  | 0,580909375 | 0,52  | 0,373555617 | -0,36 | 0,501664412 | 0,19  | 0,601996277 | -0,08 | 0,937446198 |
| Man2a2   | -0,55 | 0,486906643 | -0,26 | 0,638366221 | 0,7   | 0,281574664 | 0,58  | 0,344978832 | -1,03 | 0,214671104 |
| Man2b1   | 0,07  | 0,911662466 | -0,05 | 0,933767558 | 0,26  | 0,772008734 | 0,19  | 0,665775786 | -0,94 | 0,193796626 |
| Man2b2   | 0,24  | 0,785516518 | 0,36  | 0,483507011 | 0,02  | 0,989772079 | -0,73 | 0,116267286 | -0,41 | 0,565817768 |
| Man2c1   | -0,42 | 0,739833092 | -0,45 | 0,483436169 | 0,05  | 0,973242159 | -0,16 | 0,805169421 | -0,52 | 0,354557431 |
| Man2c1os | -0,52 | 0,410041925 | 0,6   | 0,450538273 | 0,33  | 0,762284261 | -0,69 | 0,315920459 | 0,89  | 0,101597536 |
| Manba    | -0,04 | 0,972974739 | 0,29  | 0,680709276 | 0,63  | 0,689570537 | -0,63 | 0,245229952 | -0,8  | 0,211249015 |
| Manbal   | -0,01 | 0,990894139 | -0,13 | 0,80938838  | 0,47  | 0,433481425 | -0,09 | 0,923647321 | 0,22  | 0,832848337 |
| Manea    | -0,26 | 0,56461489  | -0,35 | 0,619501651 | 0,68  | 0,424022096 | 0,41  | 0,672571582 | 0,06  | 0,97425848  |
| Maneal   | 0,19  | 0,764288636 | 0,22  | 0,674709201 | -0,32 | 0,6021281   | 0,11  | 0,800853287 | 0,14  | 0,875421436 |
| Manf     | -0,32 | 0,679648318 | 0,08  | 0,976406273 | 0,55  | 0,548288344 | 0,03  | 0,985069942 | 0,23  | 0,878966527 |
| Mansc1   | 0,66  | 0,505856084 | 0,59  | 0,281618175 | 0,46  | 0,508665815 | -0,02 | 0,974617862 | -0,34 | 0,687288078 |
| Mansc4   | 0,56  | 0,215332386 | -0,02 | 0,985845625 | 0,06  | 0,917694073 | 0,14  | 0,853331689 | 0,23  | 0,751494143 |
| Maoa     | -1,37 | 0,189644465 | -0,69 | 0,400515868 | 0,42  | 0,548288344 | -0,3  | 0,819747319 | -0,53 | 0,68987325  |
| Maob     | -0,11 | 0,925019201 | -0,18 | 0,794404033 | 0,06  | 0,955303601 | -0,82 | 0,353241029 | -0,57 | 0,559794251 |
| Map10    | 0,37  | 0,663119768 | 0,62  | 0,188301476 | -0,34 | 0,641366948 | -0,16 | 0,860277936 | 0,32  | 0,689780577 |
| Map1a    | -0,03 | 0,98600909  | 0,36  | 0,761404909 | -1    | 0,134988022 | -0,72 | 0,237012037 | -0,36 | 0,549951038 |
| Map1b    | -0,22 | 0,635313145 | 0,13  | 0,804576975 | 0,46  | 0,519796196 | 1,47  | 0,01346145  | -0,02 | 0,980945466 |
| Map1lc3a | -0,4  | 0,593540946 | 0,29  | 0,745921616 | -0,31 | 0,78984366  | -0,55 | 0,181891059 | 0,21  | 0,742614391 |
| Map1lc3b | 0,04  | 0,939647483 | 0,19  | 0,646164266 | -0,21 | 0,727548313 | -0,22 | 0,504754586 | 0,06  | 0,937558003 |
| Map1s    | -0,3  | 0,520667704 | 0,05  | 0,932292974 | 0,1   | 0,878636183 | 0,42  | 0,340742528 | -0,17 | 0,79434306  |
| Map2     | 0,73  | 0,205244362 | 0,03  | 0,975848813 | 0,92  | 0,30528316  | -0,59 | 0,366184275 | -0,12 | 0,891138902 |

|          |       |             |       |             |       |             |       |             |       |             |
|----------|-------|-------------|-------|-------------|-------|-------------|-------|-------------|-------|-------------|
| Map2k1   | 0,05  | 0,96311249  | 0,4   | 0,530207532 | -0,02 | 0,977081417 | 0,42  | 0,256072856 | 0,22  | 0,765340194 |
| Map2k2   | -0,45 | 0,282931219 | -0,09 | 0,898238238 | 0,36  | 0,509702247 | 0,14  | 0,71158821  | -0,24 | 0,635285358 |
| Map2k3   | 0,02  | 0,980913066 | -0,08 | 0,880892852 | -0,1  | 0,923350407 | 0,33  | 0,373645618 | 0,05  | 0,957993472 |
| Map2k3os | -0,3  | 0,500870793 | 0     | 1           | 0,51  | 0,393592213 | 0,02  | 0,980890499 | 0,03  | 0,980961333 |
| Map2k4   | 0,13  | 0,843853524 | 0,38  | 0,667097376 | 0,08  | 0,936840991 | 1,36  | 0,097710906 | 0,65  | 0,510444912 |
| Map2k5   | 0     | 0,998769353 | 0,01  | 0,989985353 | -0,14 | 0,922971065 | -0,37 | 0,268448842 | -0,24 | 0,694007461 |
| Map2k6   | -0,87 | 0,173455963 | -1,53 | 0,0802723   | 0,46  | 0,450947936 | 1,19  | 0,186919907 | -1    | 0,257751018 |
| Map2k7   | -0,27 | 0,612943132 | -0,62 | 0,315172623 | -0,55 | 0,338633907 | 0,74  | 0,333667149 | 0,18  | 0,892174364 |
| Map3k1   | 0,08  | 0,933253663 | 0,01  | 0,993789602 | -0,14 | 0,915671966 | -0,52 | 0,379728504 | -0,22 | 0,859686493 |
| Map3k10  | 0,01  | 0,986795639 | -0,15 | 0,763005394 | -0,19 | 0,773365699 | 0,32  | 0,426232262 | -0,09 | 0,909024113 |
| Map3k11  | -0,42 | 0,24489967  | -0,23 | 0,565881295 | 0,11  | 0,90555701  | 0,18  | 0,593098174 | -0,24 | 0,723883531 |
| Map3k12  | -0,43 | 0,447472316 | 0,26  | 0,594415097 | -0,04 | 0,964423425 | 0,01  | 0,995821993 | -0,2  | 0,848797147 |
| Map3k13  | -0,39 | 0,665901437 | 0,02  | 0,992383215 | -0,46 | 0,776071062 | -0,43 | 0,401568931 | -0,08 | 0,948640541 |
| Map3k14  | -0,39 | 0,417617334 | -0,15 | 0,843162191 | 0,25  | 0,772640578 | 0,18  | 0,810591071 | -0,13 | 0,913553402 |
| Map3k15  | 0,06  | 0,951007775 | 0,4   | 0,729611769 | 0,13  | 0,86935713  | 0,62  | 0,363397218 | -0,34 | 0,720844381 |
| Map3k19  | 0,25  | 0,680520303 | -0,43 | 0,613260487 | 0,26  | 0,684002106 | 0,4   | 0,331469785 | 0,26  | 0,676744294 |
| Map3k2   | -0,11 | 0,876749924 | 0,34  | 0,388662754 | -0,01 | 0,993379272 | 0,33  | 0,521355444 | 0,23  | 0,736140152 |
| Map3k3   | -0,02 | 0,976870178 | 0,11  | 0,815317911 | -0,06 | 0,950052494 | 0,18  | 0,652926629 | 0,23  | 0,689780577 |
| Map3k4   | -0,64 | 0,376305612 | -0,28 | 0,76490048  | 0,5   | 0,3957702   | -0,26 | 0,519126134 | -0,58 | 0,220768726 |
| Map3k5   | -0,23 | 0,770640793 | -0,36 | 0,474106654 | 0,14  | 0,915407865 | -1,57 | 0,01888325  | -0,13 | 0,867655169 |
| Map3k6   | 0,17  | 0,7987021   | -0,57 | 0,409969919 | -0,26 | 0,571405665 | -2,01 | 0,012334821 | -1,07 | 0,06299691  |
| Map3k7   | -0,15 | 0,850851423 | -0,39 | 0,627386884 | 0,54  | 0,372318571 | 0,31  | 0,561974365 | -0,08 | 0,944209421 |
| Map3k7cl | -0,12 | 0,840218728 | 0,36  | 0,457061246 | -0,07 | 0,940489823 | -2,56 | 0,01321417  | -0,71 | 0,271713687 |
| Map3k8   | 0,44  | 0,223487093 | 0,45  | 0,302028989 | -0,25 | 0,714808135 | -1,15 | 0,0260883   | 0,02  | 0,979392852 |
| Map3k9   | 0,05  | 0,956452501 | -0,29 | 0,674902403 | 0,59  | 0,188895335 | 0,43  | 0,21936569  | 0,26  | 0,655956123 |
| Map4     | -0,14 | 0,836404089 | -0,2  | 0,747707816 | 0,08  | 0,917694073 | 0,22  | 0,65601715  | -0,5  | 0,393966015 |
| Map4k1   | -0,13 | 0,822618841 | -0,45 | 0,709008929 | -0,16 | 0,898000984 | 0,4   | 0,577722004 | 0,17  | 0,877257205 |
| Map4k2   | -0,72 | 0,298771977 | -0,53 | 0,476954454 | 0,25  | 0,772829778 | -2,19 | 0,006141724 | -0,66 | 0,218199508 |
| Map4k3   | -0,07 | 0,913610209 | 0,38  | 0,424068004 | -0,19 | 0,735707604 | 0,03  | 0,970979576 | 0,39  | 0,543465696 |
| Map4k4   | -0,41 | 0,257494498 | -0,27 | 0,514228058 | 0,32  | 0,518117515 | 1,46  | 0,009073953 | -0,27 | 0,6754671   |
| Map4k5   | 0     | 0,996998625 | 0,15  | 0,781046971 | 0,08  | 0,930193129 | 1,48  | 0,009870967 | 0,17  | 0,839969557 |
| Map6     | -0,41 | 0,60936249  | -0,14 | 0,883145635 | 0,45  | 0,606696556 | 0,41  | 0,448648332 | 0,07  | 0,951429597 |
| Map6d1   | 0,29  | 0,597519827 | -0,09 | 0,84536438  | -0,11 | 0,885556448 | -0,05 | 0,914828446 | 0,07  | 0,944070399 |
| Map7     | 0,37  | 0,432863869 | -0,39 | 0,585330659 | -0,59 | 0,461745368 | -0,41 | 0,324843964 | -0,07 | 0,954316248 |
| Map7d1   | -0,09 | 0,896207658 | -0,02 | 0,985764487 | 0,04  | 0,963199274 | 0,3   | 0,511016709 | 0,33  | 0,539071004 |

|           |       |             |       |             |       |             |       |             |       |             |
|-----------|-------|-------------|-------|-------------|-------|-------------|-------|-------------|-------|-------------|
| Map7d2    | -0,26 | 0,678857468 | -0,32 | 0,462586405 | -0,33 | 0,56948206  | -0,4  | 0,663875303 | 0,12  | 0,928775639 |
| Map9      | -0,74 | 0,358272587 | 0,53  | 0,428093777 | 0,25  | 0,662451176 | 0,81  | 0,56514466  | 0,38  | 0,834867874 |
| Mapk1     | -0,28 | 0,544973307 | -0,29 | 0,75248975  | 0,56  | 0,324321658 | 0,29  | 0,74128357  | -0,41 | 0,608004947 |
| Mapk10    | -0,36 | 0,758636946 | -0,17 | 0,945366485 | 0,32  | 0,548288344 | -0,21 | 0,77859184  | -0,5  | 0,495872282 |
| Mapk11    | -0,31 | 0,527354429 | 0,05  | 0,930253753 | 0,2   | 0,857981964 | 0,14  | 0,774681882 | -0,14 | 0,868602248 |
| Mapk12    | -0,33 | 0,520948125 | 0,32  | 0,694017753 | 0,62  | 0,483752872 | -0,99 | 0,058298656 | -0,18 | 0,764656525 |
| Mapk13    | 0,88  | 0,305893528 | 0,09  | 0,937377463 | 0,36  | 0,783076595 | -0,21 | 0,769565724 | -0,15 | 0,890833196 |
| Mapk14    | -0,4  | 0,520667704 | 0,05  | 0,960594252 | 0,29  | 0,834979811 | -0,34 | 0,477595648 | -0,05 | 0,949824834 |
| Mapk15    | 0,09  | 0,91588836  | 0,19  | 0,784199242 | 0,06  | 0,948637233 | 1,05  | 0,233402422 | -0,08 | 0,956585095 |
| Mapk1ip1  | -0,04 | 0,967892992 | -0,13 | 0,884239192 | -0,44 | 0,715497532 | -1,22 | 0,337938676 | -0,07 | 0,973382116 |
| Mapk1ip11 | -0,07 | 0,907844906 | 0,03  | 0,972021982 | 0,32  | 0,516254562 | 0,24  | 0,578896547 | -0,14 | 0,819497528 |
| Mapk3     | -0,23 | 0,526173148 | -0,1  | 0,818871477 | 0,23  | 0,647707415 | -0,23 | 0,443263952 | -0,61 | 0,147999447 |
| Mapk4     | 0,07  | 0,948926586 | -0,03 | 0,977103763 | 0     | 0,997581017 | -0,05 | 0,947840929 | 0     | 0,996296454 |
| Mapk6     | -0,13 | 0,807062435 | 0,09  | 0,867512619 | 0,38  | 0,413254    | 1,84  | 0,021554691 | -0,06 | 0,95985938  |
| Mapk7     | -0,15 | 0,858977038 | 0,04  | 0,945012055 | -0,08 | 0,939946915 | 0,06  | 0,924303497 | -0,13 | 0,864049783 |
| Mapk8     | 0,19  | 0,772079485 | 0,17  | 0,856600114 | 0,21  | 0,795235368 | 0,15  | 0,865953272 | 0,26  | 0,765327693 |
| Mapk8ip1  | 0,23  | 0,833382917 | 0,48  | 0,446315327 | 0     | 0,997394645 | -0,5  | 0,332144678 | 0,33  | 0,765327693 |
| Mapk8ip2  | 0,14  | 0,885828113 | 0,77  | 0,432587683 | -1,26 | 0,145493852 | -0,33 | 0,650385638 | 0,51  | 0,418769229 |
| Mapk8ip3  | 0,21  | 0,778869381 | 0,37  | 0,39909134  | 0,07  | 0,963170499 | -0,75 | 0,100777201 | -0,28 | 0,692345696 |
| Mapk9     | -0,77 | 0,265900491 | 0,18  | 0,896322235 | -0,15 | 0,901539354 | -0,54 | 0,488287457 | -0,07 | 0,956497835 |
| Mapkap1   | -0,12 | 0,788179942 | 0,03  | 0,966717367 | 0,13  | 0,867152476 | 0,12  | 0,777673386 | -0,1  | 0,894623317 |
| Mapkapk2  | 0,25  | 0,597519827 | 0,26  | 0,585443341 | 0,03  | 0,977126842 | 0,54  | 0,11473183  | 0,38  | 0,48749006  |
| Mapkapk3  | 0,22  | 0,784114109 | -0,33 | 0,651942972 | 0,18  | 0,944441051 | 0,31  | 0,461824013 | -0,31 | 0,684349871 |
| Mapkapk5  | -0,15 | 0,74140155  | -0,17 | 0,664787536 | 0,32  | 0,614757107 | 0,04  | 0,937278546 | 0,07  | 0,933759514 |
| Mapkbp1   | -0,27 | 0,587509313 | 0,04  | 0,95647337  | 0,21  | 0,808065828 | -0,19 | 0,703803198 | 0,04  | 0,971284647 |
| Mapre1    | -0,24 | 0,632053719 | -0,13 | 0,756555599 | 0,4   | 0,65528516  | 0,28  | 0,461368887 | 0,09  | 0,902899311 |
| Mapre2    | -0,18 | 0,852358078 | -0,46 | 0,467853942 | -0,07 | 0,970992385 | -0,57 | 0,43427516  | -0,16 | 0,881673448 |
| Mapre3    | -0,22 | 0,858869926 | 0,28  | 0,689193472 | 0,38  | 0,669894613 | -0,33 | 0,504185858 | -0,52 | 0,562960086 |
| Mapt      | 0,14  | 0,840654169 | -0,21 | 0,634733109 | 0,13  | 0,895580552 | -2,57 | 0,027443269 | -0,86 | 0,446396489 |
| Marc1     | 0,31  | 0,384594555 | 0,44  | 0,472803385 | 0,47  | 0,387362229 | -0,15 | 0,817367025 | -0,21 | 0,721622418 |
| Marc2     | -0,45 | 0,325544259 | -0,08 | 0,881113709 | 0,4   | 0,705811313 | 0,08  | 0,912867628 | 0,22  | 0,797293554 |
| March1    | 0,47  | 0,494787323 | -0,15 | 0,89205859  | 0,06  | 0,94191438  | 0,02  | 0,970931237 | -0,2  | 0,835191    |
| March10   | -0,01 | 0,995091369 | 0,07  | 0,912604822 | -0,49 | 0,427338848 | 0,01  | 0,984266596 | 0,08  | 0,934185668 |
| March11   | 0,2   | 0,820785667 | 0     | 1           | 0,03  | 0,979791644 | 0,11  | 0,810252407 | -0,16 | 0,829444633 |
| March2    | 0,23  | 0,759235099 | -0,25 | 0,823246376 | 0,13  | 0,923396625 | 0,11  | 0,938689944 | -0,48 | 0,686012752 |



|              |       |             |       |             |       |             |       |             |       |             |
|--------------|-------|-------------|-------|-------------|-------|-------------|-------|-------------|-------|-------------|
| March3       | 0,13  | 0,904633081 | -0,9  | 0,087435995 | 0,39  | 0,444017304 | 1     | 0,0644887   | 0,67  | 0,395349481 |
| March4       | 0,32  | 0,495249753 | -0,21 | 0,857408462 | -0,11 | 0,909963525 | -0,15 | 0,792658025 | 0,13  | 0,889613878 |
| March5       | 0,8   | 0,291011995 | 0,61  | 0,212341437 | -0,66 | 0,303590987 | 0,22  | 0,554963509 | 1,12  | 0,047747467 |
| March6       | -0,08 | 0,876405309 | -0,37 | 0,399427798 | 0,39  | 0,61483831  | -0,18 | 0,577914953 | -0,36 | 0,504201737 |
| March7       | 0,41  | 0,317524117 | -0,09 | 0,880892852 | -0,03 | 0,970387898 | 0,62  | 0,181954316 | 0,37  | 0,541844974 |
| March8       | -0,1  | 0,886733721 | 0,02  | 0,992017084 | -0,28 | 0,780601987 | -0,2  | 0,702563225 | -0,4  | 0,573106355 |
| March9       | 0,03  | 0,976574175 | 0,07  | 0,936911187 | 0,09  | 0,909729307 | -0,12 | 0,890510418 | -0,07 | 0,963377414 |
| Marcks       | -0,06 | 0,925859559 | 0,1   | 0,820020725 | 0,29  | 0,661445401 | 0,49  | 0,122878937 | 0,05  | 0,948163009 |
| Marcksl1     | 0,35  | 0,56016348  | 0,5   | 0,786405071 | -0,28 | 0,846434359 | 0,6   | 0,545999512 | 0,43  | 0,323249283 |
| Marcksl1-ps4 | 0,05  | 0,935927529 | -0,17 | 0,818485287 | 0,11  | 0,902833174 | 0,44  | 0,21914454  | 0,04  | 0,956702425 |
| Marco        | 0     | 0,999288019 | 0,26  | 0,786394409 | -0,43 | 0,541560473 | 0,06  | 0,943853818 | 0,04  | 0,969003026 |
| Marf1        | -0,06 | 0,931340184 | 0,14  | 0,808842286 | -0,08 | 0,943934563 | -0,58 | 0,112264739 | -0,18 | 0,788112596 |
| Mark1        | -0,11 | 0,929617282 | -0,21 | 0,729423334 | -0,21 | 0,775505638 | -1,02 | 0,076348362 | -0,75 | 0,460094193 |
| Mark2        | -0,38 | 0,277154156 | 0,11  | 0,857880695 | 0     | 0,998030531 | 0,26  | 0,530537289 | -0,03 | 0,977903513 |
| Mark3        | 0,2   | 0,633977504 | 0,05  | 0,924525687 | -0,03 | 0,969570532 | -0,08 | 0,865902889 | 0,08  | 0,934615324 |
| Mark4        | -0,07 | 0,896207658 | -0,37 | 0,319970777 | -0,19 | 0,750624323 | -0,34 | 0,266024659 | -0,12 | 0,858120553 |
| Mars         | 0,22  | 0,673291416 | 0,22  | 0,726534004 | 0,32  | 0,599364835 | 0,48  | 0,229859806 | 0,7   | 0,332430866 |
| Mars2        | -0,33 | 0,852363306 | -0,88 | 0,219055424 | 0,44  | 0,548288344 | 0,74  | 0,318097982 | -0,22 | 0,906338603 |
| Marveld1     | -0,77 | 0,093379419 | -0,41 | 0,41640882  | -0,04 | 0,963221639 | -0,3  | 0,394817626 | -0,57 | 0,236669428 |
| Marveld2     | -0,75 | 0,102058516 | -0,21 | 0,75247655  | 0,52  | 0,323768621 | 0,41  | 0,277156556 | 0,03  | 0,980945466 |
| Marveld3     | 0,81  | 0,269352014 | -0,22 | 0,818717557 | -0,06 | 0,959650277 | -0,5  | 0,324843964 | -0,12 | 0,893737959 |
| Mas1         | -0,3  | 0,636730294 | -0,11 | 0,946599376 | 0,33  | 0,660517013 | 0,46  | 0,57749984  | 0,68  | 0,312830548 |
| Masp1        | -0,58 | 0,349043179 | -0,53 | 0,775914311 | 0     | 0,998779926 | 0,19  | 0,779547737 | -0,63 | 0,321280802 |
| Masp2        | 0,19  | 0,720755577 | 0,04  | 0,9381453   | 0,09  | 0,909963525 | 0,49  | 0,472342369 | 0,2   | 0,828452859 |
| Mast1        | 0,01  | 0,991919022 | -0,15 | 0,868839934 | -0,08 | 0,929395646 | 0,13  | 0,872347936 | -0,23 | 0,824818547 |
| Mast2        | 0     | 0,998113653 | -0,19 | 0,802979985 | 0,82  | 0,249821562 | -0,19 | 0,680884988 | 0,42  | 0,575543402 |
| Mast3        | -0,27 | 0,725781168 | -0,42 | 0,747707816 | 0,52  | 0,209534486 | -0,19 | 0,702311689 | -0,56 | 0,323249283 |
| Mast4        | 0,22  | 0,580909375 | -0,01 | 0,994161588 | 0,12  | 0,873364627 | 1,95  | 0,014242253 | -0,3  | 0,581626555 |
| Mastl        | -0,94 | 0,508688727 | -1,89 | 0,342614867 | 1,96  | 0,033971929 | 2,47  | 0,070474903 | -0,71 | 0,44321149  |
| Mat1a        | -0,01 | 0,994910518 | -0,13 | 0,954024651 | -0,1  | 0,923364227 | 0,39  | 0,713260063 | 0,13  | 0,902226626 |
| Mat2a        | -0,16 | 0,769930687 | 0,43  | 0,49125334  | -0,32 | 0,688126003 | -1,05 | 0,019392829 | 0,56  | 0,256989438 |
| Mat2b        | -0,07 | 0,905119661 | 0,17  | 0,660815642 | -0,33 | 0,483761569 | -0,12 | 0,87811903  | -0,33 | 0,711169781 |
| Matk         | -0,08 | 0,909885273 | 0,04  | 0,955382206 | -0,06 | 0,960189482 | 0,3   | 0,556282326 | -0,01 | 0,992629177 |
| Matn1        | -0,35 | 0,646878637 | -0,21 | 0,817110093 | 0,15  | 0,875385259 | -0,17 | 0,685043191 | 0,1   | 0,906338603 |
| Matn2        | 0,1   | 0,899663752 | -0,13 | 0,790939978 | -0,23 | 0,675674731 | -0,44 | 0,339924361 | -0,22 | 0,872665918 |

|        |       |             |       |             |       |             |       |             |       |             |
|--------|-------|-------------|-------|-------------|-------|-------------|-------|-------------|-------|-------------|
| Matn3  | 0,29  | 0,587180236 | -0,17 | 0,864029868 | -0,26 | 0,744387748 | 0,21  | 0,735958592 | 0,29  | 0,710368081 |
| Matn4  | -0,3  | 0,74672311  | -0,08 | 0,898238238 | -0,39 | 0,547368463 | 0,15  | 0,722849444 | 0,11  | 0,880134862 |
| Matr3  | 0,17  | 0,701624105 | 0,01  | 0,994137877 | -0,42 | 0,551502991 | 0,31  | 0,557232733 | 0,51  | 0,33353181  |
| Mau2   | 0,28  | 0,644313369 | 0,45  | 0,257229364 | 0,15  | 0,87393798  | -0,26 | 0,522511755 | 0,04  | 0,969957863 |
| Mavs   | 0,18  | 0,875555348 | 0,67  | 0,680709276 | 0,39  | 0,675674731 | -0,02 | 0,99017416  | -0,73 | 0,374439274 |
| Max    | -0,02 | 0,972112267 | -0,03 | 0,969019461 | -0,08 | 0,928085218 | 0,2   | 0,667301109 | 0,09  | 0,912733818 |
| Maz    | 0,05  | 0,950669622 | -0,14 | 0,789051952 | 0,49  | 0,31895631  | 0,8   | 0,112352626 | -0,22 | 0,723036695 |
| Mb     | 0,7   | 0,131976285 | -0,14 | 0,831580851 | -0,21 | 0,804910036 | 0,33  | 0,459812672 | 0,29  | 0,697757911 |
| Mb21d1 | -0,14 | 0,9231839   | 0,13  | 0,911024505 | -0,13 | 0,887476571 | -0,67 | 0,584887631 | 1,42  | 0,201664516 |
| Mb21d2 | 1,12  | 0,112724765 | 1,26  | 0,100428178 | -0,83 | 0,66027586  | 1,64  | 0,248305149 | 1,37  | 0,291856934 |
| Mbd1   | -0,71 | 0,437889909 | -0,07 | 0,909577098 | 0,29  | 0,620837479 | -0,99 | 0,062418461 | -0,59 | 0,330314966 |
| Mbd2   | 0,25  | 0,536033087 | 0,31  | 0,459231649 | -0,51 | 0,446493846 | 0,88  | 0,147022369 | 0,82  | 0,198832044 |
| Mbd3   | -0,3  | 0,625629537 | -0,2  | 0,775155136 | 0,3   | 0,58363268  | 0,12  | 0,800853287 | -0,16 | 0,825966687 |
| Mbd3l1 | 0,27  | 0,66331039  | -0,26 | 0,716668427 | -0,19 | 0,791955135 | 0,34  | 0,607583123 | -0,07 | 0,957993472 |
| Mbd3l2 | 0,17  | 0,766194359 | -0,42 | 0,574512197 | -0,01 | 0,990836784 | 0,3   | 0,603815519 | -0,03 | 0,980961333 |
| Mbd4   | -0,45 | 0,623941869 | -0,84 | 0,49941722  | 0,15  | 0,901748432 | 0,1   | 0,849242587 | -0,31 | 0,669369357 |
| Mbd5   | 0,12  | 0,88948467  | -0,21 | 0,837286018 | 0,5   | 0,463766083 | 0,54  | 0,284021242 | -0,29 | 0,721341287 |
| Mbd6   | 0,5   | 0,451391787 | 0,28  | 0,565159043 | -0,16 | 0,859819846 | -0,66 | 0,204285479 | -0,27 | 0,679619648 |
| Mbip   | -0,15 | 0,798244283 | -0,08 | 0,882931058 | -0,19 | 0,798320169 | -0,49 | 0,21001567  | -0,43 | 0,507222763 |
| Mbl1   | -0,13 | 0,839273617 | 0,23  | 0,569138123 | 0,14  | 0,839096359 | 0,13  | 0,6979045   | -0,11 | 0,885673683 |
| Mbl2   | 0,18  | 0,791150064 | 0,18  | 0,792112243 | 0,1   | 0,932640939 | -0,23 | 0,584887631 | -0,26 | 0,686695429 |
| Mblac1 | -0,51 | 0,279793863 | -0,17 | 0,790033542 | -0,53 | 0,506512245 | 0,09  | 0,942068283 | -0,09 | 0,952296554 |
| Mblac2 | 0,01  | 0,996219097 | -0,59 | 0,244058374 | 0,01  | 0,992561812 | -0,09 | 0,897101568 | 0,33  | 0,718299139 |
| Mbnl1  | -0,19 | 0,660800237 | 0,11  | 0,830849036 | -0,22 | 0,73635252  | 0,13  | 0,805426492 | 0,46  | 0,381486385 |
| Mbnl2  | -0,07 | 0,912607749 | -0,1  | 0,879693148 | 0,07  | 0,906709737 | 0,16  | 0,740451724 | -0,32 | 0,583952152 |
| Mbnl3  | -0,77 | 0,740327485 | -1,35 | 0,415198475 | 0,74  | 0,705811313 | 2,87  | 0,044942602 | 0,28  | 0,902226626 |
| Mboat1 | -1,03 | 0,306099468 | 0,08  | 0,924045581 | 1,54  | 0,209534486 | -1,53 | 0,06397564  | -0,12 | 0,947559952 |
| Mboat2 | -0,33 | 0,79795086  | -0,95 | 0,539366459 | 0,29  | 0,871929853 | 0,03  | 0,980724248 | -0,33 | 0,845218636 |
| Mboat4 | -0,08 | 0,946736897 | -0,23 | 0,71628858  | 0,16  | 0,808027675 | -0,04 | 0,9704566   | -0,09 | 0,952718905 |
| Mboat7 | -0,23 | 0,709773427 | -0,55 | 0,247966922 | 0,3   | 0,661747229 | -0,23 | 0,62296101  | -0,79 | 0,197214574 |
| Mbp    | -0,15 | 0,759235099 | -0,14 | 0,732044571 | 0,3   | 0,640924712 | -0,31 | 0,368107464 | -0,29 | 0,597080822 |
| Mbtd1  | 0,44  | 0,579630863 | -0,28 | 0,470454944 | -0,07 | 0,935168506 | 0,4   | 0,795911056 | -0,38 | 0,824818547 |
| Mbtps1 | -0,3  | 0,52759289  | -0,14 | 0,796475558 | 0,49  | 0,32858743  | -0,19 | 0,783511455 | -0,44 | 0,579739537 |
| Mbtps2 | -0,45 | 0,399784464 | 0,36  | 0,723989536 | 0,94  | 0,547936494 | 0,18  | 0,831289571 | 0,46  | 0,392211523 |
| Mc1r   | 0,03  | 0,976855185 | -0,07 | 0,932292974 | 0,29  | 0,541560473 | -0,22 | 0,630512659 | -0,29 | 0,675519772 |

|         |       |             |       |             |       |             |       |             |       |             |
|---------|-------|-------------|-------|-------------|-------|-------------|-------|-------------|-------|-------------|
| Mc2r    | 0,5   | 0,451211285 | -0,43 | 0,802979985 | 0,07  | 0,926327113 | 0,08  | 0,908141892 | 0,14  | 0,823098095 |
| Mc3r    | 0,19  | 0,70137787  | -0,04 | 0,948767477 | -0,08 | 0,932706021 | 0,29  | 0,342459451 | -0,13 | 0,870801806 |
| Mc4r    | -0,19 | 0,878384628 | 0,2   | 0,833450181 | -0,1  | 0,949334141 | -1,51 | 0,086221295 | -1,4  | 0,080696254 |
| Mc5r    | 0,13  | 0,775816042 | -0,07 | 0,908395059 | -0,73 | 0,449013439 | 0,19  | 0,671289496 | -0,1  | 0,915356549 |
| Mcam    | -0,45 | 0,202613112 | -0,24 | 0,509013394 | 0,47  | 0,307985904 | 1,65  | 0,007518975 | -0,45 | 0,499989818 |
| Mcat    | -0,49 | 0,581455317 | 0,11  | 0,831685312 | -0,3  | 0,588460338 | -0,11 | 0,874701048 | -0,35 | 0,554732238 |
| Mcc     | -0,65 | 0,363930021 | -0,1  | 0,906678859 | 0,08  | 0,938771378 | -1,3  | 0,027401066 | -0,49 | 0,311906172 |
| Mccc1   | -0,07 | 0,964272364 | -0,29 | 0,541301427 | 0,46  | 0,353588425 | -0,34 | 0,455936565 | 0,02  | 0,984675109 |
| Mccc1os | 0,12  | 0,946792769 | 0,33  | 0,830204828 | 0,13  | 0,865145801 | 0,99  | 0,169916512 | 0,36  | 0,750402388 |
| Mccc2   | -0,36 | 0,597082878 | -0,51 | 0,765705056 | -0,26 | 0,746397133 | -0,28 | 0,790763562 | -1,14 | 0,103208118 |
| Mcee    | -0,01 | 0,993728727 | 0,5   | 0,278438834 | 0,12  | 0,95204022  | -0,55 | 0,512935647 | -0,33 | 0,711637936 |
| Mcomp1  | 0,18  | 0,797534003 | -0,07 | 0,932292974 | -0,13 | 0,950725218 | 0,06  | 0,896419597 | -0,09 | 0,913469485 |
| Mcf2    | 0,14  | 0,81630789  | 0,08  | 0,912137323 | -0,09 | 0,923135714 | 0,11  | 0,89518759  | 0,07  | 0,952971656 |
| Mcf2l   | -0,18 | 0,764288636 | -0,17 | 0,783325809 | -0,31 | 0,548288344 | -1,41 | 0,020288742 | -1,76 | 0,005828559 |
| Mcfd2   | 0,01  | 0,992774066 | -0,55 | 0,636808086 | 0,27  | 0,83271048  | 0,3   | 0,587049277 | -0,03 | 0,980904768 |
| Mchr1   | 0,45  | 0,527937074 | -0,25 | 0,777990999 | -0,2  | 0,823374455 | 0,06  | 0,93770121  | 0,22  | 0,765340194 |
| Mcidas  | 0,18  | 0,758136438 | -0,35 | 0,619709049 | 0,22  | 0,710465251 | -0,14 | 0,870487162 | -0,64 | 0,629481302 |
| Mcl1    | 0,2   | 0,717407143 | 0,71  | 0,325242663 | -0,92 | 0,102215134 | -0,35 | 0,354518226 | 0,5   | 0,368099774 |
| Mcm10   | -0,47 | 0,295153704 | -1,13 | 0,307349837 | 0,82  | 0,348284918 | 1,75  | 0,081012926 | 0,03  | 0,982481285 |
| Mcm2    | -1,6  | 0,016359317 | -2,2  | 0,040620931 | 1,8   | 0,135721222 | 1,46  | 0,026493467 | -1,22 | 0,053570529 |
| Mcm3    | -1    | 0,076386406 | -1,31 | 0,111626097 | 1,31  | 0,068729088 | 0,67  | 0,124505112 | -0,15 | 0,825862506 |
| Mcm3ap  | -0,28 | 0,734622176 | -0,16 | 0,829923566 | -0,68 | 0,146057468 | 0,28  | 0,614173493 | 0,23  | 0,805875294 |
| Mcm4    | -1,21 | 0,077161113 | -1,6  | 0,10752682  | 1,51  | 0,063243606 | 0,44  | 0,469378969 | -0,63 | 0,407954259 |
| Mcm5    | -0,92 | 0,117100226 | -2,05 | 0,070776028 | 1,57  | 0,043040739 | 1,88  | 0,017429369 | -0,64 | 0,298559636 |
| Mcm6    | -0,43 | 0,385512506 | -0,91 | 0,292915808 | 1,13  | 0,036818657 | 1,83  | 0,018183641 | -0,03 | 0,979845089 |
| Mcm7    | -0,89 | 0,214430522 | -2,6  | 0,109267475 | 1,6   | 0,030806703 | 0,42  | 0,720492101 | -0,79 | 0,349150128 |
| Mcm8    | -0,46 | 0,514409318 | -0,44 | 0,487771533 | 0,43  | 0,549895527 | 0,41  | 0,330098597 | -0,22 | 0,774885677 |
| Mcm9    | -0,3  | 0,543369683 | 0,79  | 0,384132053 | 0,47  | 0,69871815  | -0,51 | 0,517148433 | 0,12  | 0,921589508 |
| Mcmbp   | -0,18 | 0,757032046 | -0,46 | 0,309789903 | 0,18  | 0,821229302 | 0,37  | 0,335974239 | -0,02 | 0,984125319 |
| Mcmdc2  | 0,32  | 0,571059837 | -0,12 | 0,853569707 | 0,11  | 0,919309335 | -0,08 | 0,917183011 | -0,2  | 0,868992925 |
| Mcoln1  | 0,25  | 0,66331039  | 0,37  | 0,386629492 | 0,45  | 0,456595062 | -0,17 | 0,751826661 | 0,02  | 0,985448733 |
| Mcoln2  | -0,22 | 0,704646948 | 0,33  | 0,584919793 | 0,21  | 0,764620512 | 0,4   | 0,37758398  | 0,43  | 0,48229889  |
| Mcoln3  | 0,41  | 0,434641897 | -0,23 | 0,813541606 | -0,09 | 0,911894304 | 0,17  | 0,87148686  | 0,3   | 0,767310323 |
| Mcph1   | 0,36  | 0,724502628 | -0,49 | 0,458770201 | -0,04 | 0,969844657 | 0,61  | 0,238763429 | -0,64 | 0,229389194 |
| Mcpt1   | 0,24  | 0,662188763 | 0,09  | 0,884434898 | -0,91 | 0,804784019 | -0,39 | 0,44332079  | -0,17 | 0,88762419  |

|          |       |             |       |             |       |             |       |             |       |             |
|----------|-------|-------------|-------|-------------|-------|-------------|-------|-------------|-------|-------------|
| Mcpt2    | 0,08  | 0,960597621 | 0,04  | 0,976339541 | -1,99 | 0,723037215 | -0,28 | 0,572313979 | -0,16 | 0,826379382 |
| Mcpt4    | 0,61  | 0,475347914 | 0,07  | 0,911014838 | -0,82 | 0,79007666  | -0,27 | 0,546225053 | 0,69  | 0,537706015 |
| Mcpt8    | -0,09 | 0,90371254  | 0,2   | 0,867265251 | 0,46  | 0,514610288 | -0,19 | 0,72073475  | -0,02 | 0,984171253 |
| Mcpt9    | 0,25  | 0,865055523 | -0,48 | 0,484006822 | 0,04  | 0,978484857 | 0,31  | 0,60144844  | 0     | 0,996197742 |
| Mcpt-ps1 | -0,03 | 0,964154899 | 0,11  | 0,832444435 | -0,56 | 0,509702247 | -0,02 | 0,979829655 | 0,1   | 0,912944912 |
| Mcrs1    | -0,27 | 0,653980384 | -0,49 | 0,421936856 | 0,55  | 0,262321406 | -0,08 | 0,883739162 | -0,64 | 0,326012495 |
| Mctp1    | -1,05 | 0,27550648  | 0,72  | 0,200674509 | -0,21 | 0,817506865 | 0,68  | 0,466887908 | -0,96 | 0,32673984  |
| Mctp2    | -0,1  | 0,92366013  | 0,54  | 0,553077784 | -0,14 | 0,899387868 | -1,03 | 0,043778357 | -0,57 | 0,250948771 |
| Mcts1    | 0,14  | 0,771904131 | -0,12 | 0,913413404 | -0,44 | 0,632167655 | 1,08  | 0,05727577  | 0,33  | 0,498598092 |
| Mcts2    | -0,01 | 0,988674093 | 0,45  | 0,391122953 | -0,26 | 0,824083851 | -0,32 | 0,327876546 | 0,61  | 0,209473482 |
| Mcu      | -0,46 | 0,559508361 | -0,26 | 0,747707816 | -0,03 | 0,98021051  | -0,25 | 0,724241553 | -0,25 | 0,767526937 |
| Mcur1    | 0,43  | 0,408313743 | 0,67  | 0,170572591 | -0,37 | 0,501826628 | -0,13 | 0,884713104 | 0,72  | 0,360726287 |
| Mdc1     | -0,48 | 0,632053719 | -0,51 | 0,627604728 | 0,14  | 0,862783746 | -0,59 | 0,191238876 | -0,74 | 0,177488953 |
| Mdfi     | -0,44 | 0,613990129 | -0,04 | 0,943915456 | 0,01  | 0,994008884 | 0,73  | 0,078580386 | -0,16 | 0,884248437 |
| Mdfic    | -0,1  | 0,826083295 | -0,02 | 0,984121306 | -0,22 | 0,714346477 | 0,02  | 0,974038709 | 0,28  | 0,639812015 |
| Mdga1    | 0,3   | 0,642618049 | -0,1  | 0,915265253 | 0,6   | 0,259097047 | 0,59  | 0,239686417 | 0,03  | 0,986971861 |
| Mdga2    | 0,23  | 0,747914748 | 0,48  | 0,402393337 | -0,16 | 0,786838878 | -0,62 | 0,096112283 | -0,39 | 0,474884048 |
| Mdh1     | -0,11 | 0,812327104 | -0,01 | 0,994376785 | 0,39  | 0,498063282 | 0,48  | 0,610149813 | 0,16  | 0,9039404   |
| Mdh1b    | 0,41  | 0,353022744 | -0,01 | 0,993068441 | 0,04  | 0,950725218 | -0,04 | 0,926222124 | 0,09  | 0,918865935 |
| Mdh2     | -0,25 | 0,57672557  | -0,47 | 0,277253387 | 0,56  | 0,163974924 | 0,37  | 0,221156241 | -0,23 | 0,708051749 |
| Mdk      | -0,03 | 0,976574175 | 0,13  | 0,89474699  | 0,25  | 0,734124133 | 0     | 0,998900166 | 0,19  | 0,817541479 |
| Mdm1     | -0,58 | 0,550956091 | -0,87 | 0,219431116 | 0,58  | 0,530603857 | 0,65  | 0,32204118  | -0,49 | 0,579591044 |
| Mdm2     | 0,12  | 0,840446684 | -0,03 | 0,980035252 | 0,1   | 0,947460329 | 0,64  | 0,201562853 | 0,31  | 0,579078942 |
| Mdm4     | -0,15 | 0,898129222 | -0,12 | 0,915784454 | -0,46 | 0,633885234 | 0,74  | 0,058209261 | 0,29  | 0,716229308 |
| Mdn1     | -0,81 | 0,521000753 | -0,3  | 0,646613262 | 0,72  | 0,343192409 | 0,47  | 0,313135055 | -0,05 | 0,953989345 |
| Mdp1     | 0,16  | 0,789090112 | 0,13  | 0,839789639 | -0,14 | 0,896467636 | -0,17 | 0,671346789 | 0,02  | 0,979456872 |
| Mdrl     | -0,44 | 0,37235038  | -0,39 | 0,56209327  | 0,54  | 0,374422909 | 0,16  | 0,729682876 | -0,09 | 0,914498972 |
| Me1      | -0,21 | 0,885454906 | 0,01  | 0,9860901   | 0,23  | 0,823823322 | 1,18  | 0,021191989 | -0,68 | 0,579869722 |
| Me2      | -0,61 | 0,453653527 | -0,55 | 0,535253422 | -0,13 | 0,877598693 | 0,91  | 0,292891619 | -0,09 | 0,949102947 |
| Me3      | -0,04 | 0,968500829 | -0,16 | 0,898256272 | 0,7   | 0,341648319 | 0,43  | 0,27494172  | 0,7   | 0,431894609 |
| Mea1     | 0,06  | 0,90742841  | -0,1  | 0,859954464 | 0,26  | 0,711242277 | 0,39  | 0,394808858 | 0,19  | 0,839260365 |
| Meaf6    | 0,01  | 0,993728727 | -0,16 | 0,775155136 | -0,2  | 0,877023506 | -0,6  | 0,121193897 | -0,91 | 0,234889021 |
| Mecom    | -0,32 | 0,552940583 | 0,15  | 0,846624873 | 0,25  | 0,697080187 | 0,61  | 0,390424873 | 0,07  | 0,955499131 |
| Mecp2    | 0,14  | 0,825308689 | 0,17  | 0,761413306 | -0,44 | 0,329525512 | -0,84 | 0,113417088 | 0,15  | 0,860759487 |
| Mecr     | -0,48 | 0,486906643 | -0,57 | 0,640299669 | 0,24  | 0,716261194 | 0,6   | 0,186560557 | -0,16 | 0,836205142 |

|        |       |             |       |             |       |             |       |             |       |             |
|--------|-------|-------------|-------|-------------|-------|-------------|-------|-------------|-------|-------------|
| Med1   | -0,03 | 0,968309565 | 0,02  | 0,989825179 | -0,29 | 0,560376292 | -0,09 | 0,85301747  | 0,15  | 0,816435488 |
| Med10  | 0,19  | 0,721432139 | -0,12 | 0,829391238 | 0,17  | 0,777745152 | 0,06  | 0,921036173 | -0,22 | 0,813308036 |
| Med11  | 0,05  | 0,932982682 | 0,46  | 0,366674056 | 0,06  | 0,954550124 | -0,24 | 0,572100344 | 0,01  | 0,992694729 |
| Med12  | -0,28 | 0,585256816 | -0,12 | 0,829981547 | -0,09 | 0,924885998 | -0,26 | 0,422600163 | -0,23 | 0,728207329 |
| Med12l | -0,2  | 0,778869381 | 0,11  | 0,876503933 | 0,07  | 0,94191438  | 0,4   | 0,352630383 | 0,02  | 0,984125319 |
| Med13  | 0,27  | 0,602131835 | 0,55  | 0,274017201 | -0,04 | 0,957856253 | -0,3  | 0,390823877 | 0,53  | 0,227079289 |
| Med13l | 0,26  | 0,65602843  | 0,18  | 0,83754738  | -0,04 | 0,968874924 | -0,48 | 0,339455217 | -0,46 | 0,353651444 |
| Med14  | 0,08  | 0,961260332 | -0,22 | 0,775914311 | 0,42  | 0,599202081 | 0,15  | 0,656372073 | 0,16  | 0,818041383 |
| Med15  | -0,12 | 0,816316218 | -0,35 | 0,463954617 | 0,05  | 0,95303117  | 0,67  | 0,074528171 | -0,06 | 0,940092696 |
| Med16  | -0,52 | 0,20299588  | -0,36 | 0,568187167 | 0,31  | 0,703647945 | -0,32 | 0,418410394 | -0,51 | 0,291178873 |
| Med17  | -0,46 | 0,401159049 | -0,7  | 0,224939184 | 0,31  | 0,79541037  | 0,1   | 0,906297748 | -0,06 | 0,960774794 |
| Med18  | -0,01 | 0,997205466 | 0,17  | 0,802657918 | 0,2   | 0,834122191 | -0,18 | 0,75887854  | -0,38 | 0,734725045 |
| Med19  | -0,14 | 0,829299665 | 0,25  | 0,625784044 | 0,17  | 0,752954039 | 0,23  | 0,605853337 | 0,19  | 0,825697364 |
| Med20  | -0,44 | 0,557289509 | -0,25 | 0,807175471 | 0,63  | 0,628427952 | 0,13  | 0,922740736 | 0     | 0,996744696 |
| Med21  | 0,08  | 0,907391935 | 0     | 1           | 0,23  | 0,653622586 | 0,33  | 0,376988783 | 0     | 0,997254437 |
| Med22  | -0,41 | 0,493923359 | -0,02 | 0,994321327 | -0,21 | 0,878253755 | 0,15  | 0,76830702  | -0,51 | 0,378505645 |
| Med23  | 0,42  | 0,416726762 | -0,01 | 0,994148616 | 0,86  | 0,460623567 | 0,02  | 0,980883383 | 0,05  | 0,96963338  |
| Med24  | -0,35 | 0,326903119 | -0,21 | 0,709432782 | -0,03 | 0,977934465 | 0     | 1           | -0,9  | 0,298446845 |
| Med25  | -0,3  | 0,640057031 | -0,03 | 0,964639041 | 0,37  | 0,616398569 | 0,13  | 0,733444718 | -0,02 | 0,980961333 |
| Med26  | -0,25 | 0,782203502 | -0,21 | 0,882847123 | 0,45  | 0,516254562 | -0,25 | 0,71158821  | -0,13 | 0,915356549 |
| Med27  | -0,05 | 0,947117278 | 0,25  | 0,827237618 | -0,25 | 0,774090289 | -0,18 | 0,665234661 | -0,11 | 0,920355527 |
| Med28  | 0,36  | 0,42410459  | 0,06  | 0,956857157 | 0,06  | 0,956894731 | -0,42 | 0,604127556 | -0,16 | 0,879072575 |
| Med29  | 0,01  | 0,982213914 | -0,18 | 0,719308025 | -0,17 | 0,817818413 | 0,21  | 0,523262994 | -0,08 | 0,930287169 |
| Med30  | -0,43 | 0,286031652 | -1,01 | 0,192998361 | 0,25  | 0,823823322 | 0,11  | 0,907350266 | -0,49 | 0,568949282 |
| Med31  | 0,41  | 0,367747087 | 0,15  | 0,834864442 | 0,15  | 0,868590766 | -0,43 | 0,262655177 | 0,26  | 0,633822817 |
| Med4   | -0,39 | 0,559563033 | 0,04  | 0,967833514 | -0,02 | 0,995530191 | 0,08  | 0,943143586 | 0,02  | 0,986849867 |
| Med6   | -0,11 | 0,839375532 | -0,05 | 0,925078626 | 0,4   | 0,678840444 | 0,13  | 0,834390338 | 0,07  | 0,94919447  |
| Med7   | -0,3  | 0,389268664 | 0,02  | 0,998215982 | -0,04 | 0,982305856 | -0,91 | 0,612066557 | 0,34  | 0,826492226 |
| Med8   | -0,01 | 0,992296615 | -0,42 | 0,622161495 | -0,08 | 0,926101084 | 0,38  | 0,607090688 | 0,29  | 0,702402249 |
| Med9   | -0,06 | 0,921306075 | -0,09 | 0,893120863 | -0,07 | 0,951601163 | 0,27  | 0,694589754 | 0,11  | 0,898185407 |
| Med9os | 0,16  | 0,783985388 | -0,3  | 0,723989536 | -0,13 | 0,89248624  | 0,02  | 0,987819648 | -0,07 | 0,947559952 |
| Medag  | 0,05  | 0,946792769 | 0,57  | 0,793842674 | 0,14  | 0,920158784 | -0,47 | 0,739388845 | 0,1   | 0,949751787 |
| Mef2a  | -0,21 | 0,602735958 | -0,1  | 0,819751359 | 0,12  | 0,849697489 | -0,42 | 0,207103713 | 0,16  | 0,792305774 |
| Mef2b  | 0,32  | 0,547858198 | 0,21  | 0,669354789 | -0,05 | 0,976350824 | -0,12 | 0,872022622 | -0,09 | 0,928724353 |
| Mef2c  | -0,62 | 0,239601221 | 0,25  | 0,648367629 | -0,32 | 0,566099777 | -0,4  | 0,270537099 | 0,12  | 0,885919236 |

|         |       |             |       |             |       |             |       |             |       |             |
|---------|-------|-------------|-------|-------------|-------|-------------|-------|-------------|-------|-------------|
| Mef2d   | 0     | 0,999288019 | -0,04 | 0,967833514 | 0,06  | 0,950278774 | 0,26  | 0,417954367 | -0,15 | 0,825564898 |
| Mefv    | 0,2   | 0,785491059 | -0,38 | 0,733269724 | -0,6  | 0,440550754 | 0,26  | 0,782292996 | 0,51  | 0,515067033 |
| Meg3    | -0,01 | 0,996219097 | -0,06 | 0,900782278 | 0,17  | 0,852306527 | 0,23  | 0,632826226 | 0,35  | 0,616797608 |
| Megf10  | -0,18 | 0,820785667 | -0,15 | 0,855713502 | 0,15  | 0,849342965 | -0,16 | 0,818711104 | -0,22 | 0,824786349 |
| Megf11  | -0,43 | 0,389268664 | 0,21  | 0,859816636 | -0,05 | 0,94940954  | -0,39 | 0,542059352 | -0,44 | 0,505746761 |
| Megf6   | 0,15  | 0,755100499 | -0,03 | 0,960253381 | -0,01 | 0,997220401 | 0,04  | 0,944769683 | -0,1  | 0,904684159 |
| Megf8   | -0,6  | 0,322009501 | -0,1  | 0,849473761 | 0,23  | 0,794194778 | 0,36  | 0,27494172  | -0,36 | 0,447069168 |
| Megf9   | -0,28 | 0,749319051 | -0,03 | 0,99074556  | 0,33  | 0,723987482 | -1,24 | 0,137777394 | -0,34 | 0,777561251 |
| Mei1    | 0,58  | 0,327334001 | 0,2   | 0,811204841 | -0,17 | 0,838289412 | -0,28 | 0,511493252 | -0,26 | 0,695992915 |
| Mei4    | -0,13 | 0,834672627 | 0,35  | 0,510894317 | 0,01  | 0,991168026 | 0,01  | 0,986544789 | 0,39  | 0,513517573 |
| Meig1   | -0,05 | 0,950127033 | -0,08 | 0,910010735 | 0,27  | 0,721083003 | 0,4   | 0,459812672 | -0,09 | 0,953297732 |
| Meikin  | -0,1  | 0,90742841  | 0,44  | 0,77325041  | -0,02 | 0,986406216 | 0,47  | 0,178931682 | 0,02  | 0,982321176 |
| Meiob   | -0,25 | 0,814042243 | 0,22  | 0,772977288 | -0,02 | 0,979791644 | -0,43 | 0,594037577 | 0,3   | 0,828679046 |
| Meioc   | -0,12 | 0,891140162 | 0,02  | 0,987162042 | 0,04  | 0,968742139 | 0,01  | 0,985160853 | -0,13 | 0,879940651 |
| Meis1   | 0,11  | 0,892823025 | -0,02 | 0,987188179 | 0,08  | 0,938864861 | -3,52 | 0,004331967 | -1,06 | 0,258378279 |
| Meis2   | -0,57 | 0,658266451 | 0,44  | 0,488489865 | 0,83  | 0,65528516  | -7,7  | 0,001139257 | 0,07  | 0,917110997 |
| Meis3   | 0,24  | 0,67806773  | 0,13  | 0,893005076 | 0,25  | 0,740188839 | -0,63 | 0,451721309 | -0,17 | 0,879075155 |
| Melk    | -0,61 | 0,480468471 | -0,9  | 0,354667412 | 0,54  | 0,636643861 | 2,04  | 0,021536511 | 0,24  | 0,738412365 |
| Memo1   | 0,23  | 0,864526424 | 0,11  | 0,962617743 | 0,23  | 0,847564027 | 0,06  | 0,947167456 | 0,21  | 0,855741842 |
| Men1    | -0,11 | 0,898746854 | -0,44 | 0,441593532 | -0,09 | 0,909963525 | -0,08 | 0,894007511 | -0,39 | 0,551235319 |
| Meox1   | -1,3  | 0,151560276 | -0,36 | 0,548864888 | 0,31  | 0,493682776 | -0,16 | 0,758588473 | -0,17 | 0,805875294 |
| Meox2   | -0,26 | 0,660482793 | 0,66  | 0,520003681 | -0,08 | 0,950557667 | 3,13  | 0,008469502 | 0,15  | 0,928764431 |
| Mep1a   | 0,34  | 0,469692532 | 0,06  | 0,973565504 | -0,3  | 0,615591382 | -0,68 | 0,242691189 | 0,27  | 0,777995917 |
| Mep1b   | 0,34  | 0,520448711 | -0,48 | 0,501438027 | -0,08 | 0,935854369 | 0,18  | 0,727086939 | 0,23  | 0,740830591 |
| Mepce   | 0,53  | 0,355202115 | 0,41  | 0,446291929 | 0,35  | 0,785676028 | -1,09 | 0,019575225 | 0,14  | 0,843351909 |
| Mepe    | 0,01  | 0,990894139 | -0,12 | 0,859295689 | 0,07  | 0,930169322 | 0,17  | 0,71158821  | 0,02  | 0,984632256 |
| Mertk   | 0,01  | 0,996102654 | 0,42  | 0,531718087 | -0,54 | 0,683917899 | -2,32 | 0,01321417  | 0,14  | 0,878456345 |
| Mesdc1  | 0,62  | 0,160321093 | 0,25  | 0,615311543 | 0,06  | 0,953917674 | 0,17  | 0,853419763 | -0,01 | 0,995298243 |
| Mesdc2  | 0,31  | 0,650445481 | 0,41  | 0,661976216 | 0,87  | 0,218005052 | -0,68 | 0,461824013 | 0,07  | 0,962631948 |
| Mesp1   | -0,19 | 0,653488514 | 0,57  | 0,303562294 | -0,36 | 0,38885851  | -0,28 | 0,35041965  | 0,23  | 0,746672639 |
| Mesp2   | 0,25  | 0,584119959 | -0,15 | 0,746439988 | -0,04 | 0,962766843 | -0,05 | 0,923403061 | 0,01  | 0,992370267 |
| Mest    | -1,03 | 0,11435382  | -1,36 | 0,070776028 | 2,46  | 0,000344412 | 2,38  | 0,003907268 | -0,4  | 0,380249917 |
| Met     | 0,29  | 0,793172703 | 0,46  | 0,529278426 | 0,29  | 0,688126003 | 0,38  | 0,702311689 | 0,73  | 0,466415956 |
| Metap1  | -0,05 | 0,946792769 | -0,26 | 0,644516897 | 0,36  | 0,661445401 | 1,11  | 0,126608574 | 0,24  | 0,855801508 |
| Metap1d | 0,19  | 0,778869381 | -0,23 | 0,855980649 | -0,45 | 0,576047805 | -0,31 | 0,754251095 | -0,56 | 0,587305934 |

|          |       |             |       |             |       |             |       |             |       |             |
|----------|-------|-------------|-------|-------------|-------|-------------|-------|-------------|-------|-------------|
| Metap2   | -0,14 | 0,832947001 | -0,47 | 0,298168653 | 0,44  | 0,503650142 | 0,95  | 0,049592586 | 0,47  | 0,435921409 |
| Methig1  | 0,25  | 0,745283472 | -0,37 | 0,694422914 | 0,03  | 0,984778342 | 0,14  | 0,838806433 | -0,63 | 0,492374471 |
| Metrn    | -0,27 | 0,599566593 | -0,2  | 0,617339955 | 0,76  | 0,093680806 | 0,11  | 0,830974926 | -0,25 | 0,763240477 |
| Metrnl   | 0,69  | 0,233248426 | 0,11  | 0,867265251 | 0,08  | 0,940489823 | 0,27  | 0,519919894 | 0,15  | 0,872242794 |
| Mettl1   | -0,23 | 0,795286609 | -0,47 | 0,510694367 | 0,76  | 0,433481425 | 1,53  | 0,035837218 | -0,19 | 0,836061657 |
| Mettl10  | -0,59 | 0,179001759 | 0,33  | 0,753679288 | -0,09 | 0,950725218 | -0,18 | 0,916589731 | 0,01  | 0,997299415 |
| Mettl11b | 0,14  | 0,822213681 | 0,25  | 0,609576972 | -0,06 | 0,941254389 | -0,32 | 0,48485622  | 0,07  | 0,947559952 |
| Mettl13  | -0,2  | 0,707502054 | 0,29  | 0,715042819 | 0,02  | 0,987208663 | 0,16  | 0,823045201 | 0,32  | 0,581814709 |
| Mettl14  | 0,23  | 0,691658566 | 0,04  | 0,983071427 | -0,04 | 0,984778342 | -0,37 | 0,635378562 | 0,08  | 0,937446198 |
| Mettl15  | -0,09 | 0,942119638 | -0,5  | 0,642150843 | 0,09  | 0,943159472 | 0,19  | 0,870547745 | -0,14 | 0,911850421 |
| Mettl16  | -0,37 | 0,534936989 | -0,33 | 0,68684081  | 0,7   | 0,230563018 | 0,31  | 0,786063634 | 0,29  | 0,820125319 |
| Mettl17  | -0,17 | 0,841140165 | -0,17 | 0,831580851 | 0,18  | 0,830336321 | -0,27 | 0,561953814 | -0,09 | 0,916981889 |
| Mettl18  | -0,66 | 0,531771765 | -0,07 | 0,963791015 | 0,16  | 0,925248877 | -1,78 | 0,049871982 | 0,04  | 0,983453096 |
| Mettl2   | 0,13  | 0,818182081 | -0,57 | 0,600955386 | -0,09 | 0,941627748 | -0,28 | 0,479095137 | -0,09 | 0,935006901 |
| Mettl20  | -0,72 | 0,277313998 | 0,04  | 0,961139695 | 0,12  | 0,899913569 | -3,12 | 0,006048812 | -0,61 | 0,429206436 |
| Mettl21a | -0,2  | 0,867025523 | 0     | 1           | -0,04 | 0,97674065  | -0,23 | 0,904971257 | -0,18 | 0,915067495 |
| Mettl21b | 0,31  | 0,808947569 | 0,04  | 0,966078321 | -0,08 | 0,950846671 | 0,48  | 0,228907634 | 0,29  | 0,694233384 |
| Mettl21c | -0,04 | 0,964124037 | 0,26  | 0,501363048 | -0,22 | 0,693217111 | 0,05  | 0,922740736 | 0,12  | 0,864166878 |
| Mettl21e | 0,61  | 0,109917869 | -0,42 | 0,671319666 | -0,1  | 0,878253755 | 0,21  | 0,778212842 | -0,26 | 0,677687906 |
| Mettl22  | -0,53 | 0,597082878 | -0,23 | 0,802979985 | -0,12 | 0,914354795 | -0,23 | 0,628251769 | -0,28 | 0,587440076 |
| Mettl23  | 0,47  | 0,513512947 | 0,12  | 0,867324954 | 0,12  | 0,930391017 | -0,4  | 0,219117195 | -0,07 | 0,918684715 |
| Mettl24  | -0,09 | 0,904141742 | -0,23 | 0,728083849 | 0,01  | 0,994511428 | -1,3  | 0,259714992 | -1,46 | 0,182081944 |
| Mettl25  | 0,14  | 0,905025251 | 0,43  | 0,732847182 | 0,2   | 0,923396625 | -1,06 | 0,067122689 | 0,2   | 0,804576732 |
| Mettl3   | 0,24  | 0,79795086  | 0,21  | 0,817110093 | -0,29 | 0,767822182 | -0,56 | 0,310394717 | -0,19 | 0,791840213 |
| Mettl4   | -0,05 | 0,960004176 | -0,13 | 0,88741189  | 0,21  | 0,922807267 | -0,43 | 0,263376759 | -0,79 | 0,109356868 |
| Mettl5   | 0,1   | 0,9154154   | -0,04 | 0,969659604 | 0,73  | 0,212291286 | -0,65 | 0,250385956 | -0,2  | 0,846354015 |
| Mettl5os | 0,04  | 0,973545171 | -0,58 | 0,29487254  | 0,28  | 0,755102847 | -0,54 | 0,749306304 | -0,17 | 0,950308536 |
| Mettl6   | 0,24  | 0,751527476 | -0,07 | 0,911926621 | -0,09 | 0,971668287 | 0,32  | 0,694368504 | -0,08 | 0,960974478 |
| Mettl7a1 | -0,7  | 0,619127292 | -0,39 | 0,857490594 | -0,54 | 0,6410789   | -3,59 | 0,030067737 | -0,64 | 0,245859871 |
| Mettl7a2 | 0,09  | 0,864403632 | 0,13  | 0,786394409 | -0,19 | 0,830639813 | -0,04 | 0,949578813 | -0,44 | 0,370187845 |
| Mettl7a3 | -0,09 | 0,904633081 | 0,22  | 0,694587331 | 0,33  | 0,715497532 | -0,33 | 0,366058015 | -0,19 | 0,854494093 |
| Mettl7b  | -0,3  | 0,589783488 | 0,24  | 0,62956907  | -0,04 | 0,957152002 | 0,41  | 0,319057242 | 1,29  | 0,032750472 |
| Mettl8   | -0,12 | 0,944291635 | 0,07  | 0,88632917  | 0,37  | 0,624057916 | -0,38 | 0,353164818 | -0,32 | 0,728578071 |
| Mettl9   | -0,19 | 0,638456995 | -0,18 | 0,689193472 | 0,15  | 0,868938606 | 0,23  | 0,698921024 | 0,43  | 0,505878125 |
| Mex3a    | -0,29 | 0,673291416 | 0     | 1           | 0,05  | 0,956570063 | 0,68  | 0,072649185 | 0,25  | 0,80484971  |

|         |       |             |       |             |       |             |       |             |       |             |
|---------|-------|-------------|-------|-------------|-------|-------------|-------|-------------|-------|-------------|
| Mex3b   | -0,26 | 0,483395607 | -0,28 | 0,488525923 | 0,06  | 0,953856834 | 0,16  | 0,703831158 | -0,2  | 0,800089812 |
| Mex3c   | 0,16  | 0,730385117 | 0,02  | 0,985905357 | 0,31  | 0,660920525 | 0,41  | 0,234873973 | -0,02 | 0,981439632 |
| Mex3d   | -0,11 | 0,822213681 | 0,15  | 0,7219659   | 0,22  | 0,73088855  | 0,25  | 0,48546658  | 0,03  | 0,979338129 |
| Mfap2   | -0,08 | 0,93370499  | -0,13 | 0,819594885 | 0,11  | 0,929871006 | -0,51 | 0,343209274 | -0,09 | 0,969364569 |
| Mfap3   | -0,17 | 0,919567534 | -0,3  | 0,857503073 | -0,17 | 0,856263477 | 0,33  | 0,434295291 | -0,39 | 0,567170431 |
| Mfap3l  | -0,39 | 0,718059583 | 0,39  | 0,732847182 | -0,21 | 0,940489823 | 0,78  | 0,043583743 | 0,34  | 0,673145862 |
| Mfap4   | 0,37  | 0,692490424 | -0,34 | 0,847885195 | -0,17 | 0,836625711 | 0,36  | 0,742291133 | -0,13 | 0,920355527 |
| Mfap5   | -0,2  | 0,764189777 | 0,22  | 0,839283725 | 0,08  | 0,955217689 | -0,25 | 0,609105658 | -0,34 | 0,5626246   |
| Mff     | -0,04 | 0,963914207 | -0,01 | 0,99611256  | 0,39  | 0,622321935 | 0,49  | 0,127367832 | 0,01  | 0,987680175 |
| Mfge8   | -0,43 | 0,36240006  | -0,26 | 0,62733885  | 0,24  | 0,689058581 | -0,1  | 0,88505759  | -0,21 | 0,792404969 |
| Mfhas1  | -0,36 | 0,545334298 | -0,35 | 0,518494408 | 0,45  | 0,292557534 | -0,07 | 0,9540749   | -0,5  | 0,571269331 |
| Mfi2    | -0,19 | 0,640188356 | 0,11  | 0,901321339 | -0,11 | 0,867489743 | 0,23  | 0,765492742 | 0,14  | 0,896837335 |
| Mfn1    | -0,64 | 0,38239969  | -0,37 | 0,561842393 | 0,69  | 0,641381759 | 0,25  | 0,660439712 | 0,12  | 0,891925115 |
| Mfn2    | 0,05  | 0,958512892 | -0,21 | 0,86297915  | 0,39  | 0,613786721 | 0,26  | 0,410137655 | 0,03  | 0,975441362 |
| Mfng    | -0,55 | 0,227753128 | -0,49 | 0,295775341 | 0,1   | 0,885717233 | 0,27  | 0,508709492 | -0,81 | 0,132370772 |
| Mfsd1   | -0,33 | 0,578185633 | -0,03 | 0,978904487 | 0,78  | 0,194619745 | 0,12  | 0,853419763 | -0,08 | 0,949544475 |
| Mfsd10  | -0,18 | 0,793172703 | -0,34 | 0,641804702 | 0,17  | 0,850258511 | 0,03  | 0,963001955 | -0,6  | 0,325047384 |
| Mfsd11  | -0,08 | 0,964154899 | -0,16 | 0,863221925 | 0,53  | 0,756069436 | 0,44  | 0,389081286 | 0,07  | 0,947254077 |
| Mfsd12  | -0,31 | 0,630558551 | -0,2  | 0,855632384 | 0     | 0,998779926 | 0,69  | 0,322564589 | 0,4   | 0,761024963 |
| Mfsd14a | -0,33 | 0,464531121 | 0,12  | 0,897634338 | -0,17 | 0,83900004  | 0,39  | 0,614617075 | 0     | 0,999303691 |
| Mfsd14b | -0,06 | 0,950669622 | 0,28  | 0,686744605 | -0,09 | 0,945504473 | -0,16 | 0,866757253 | -0,26 | 0,844063077 |
| Mfsd2a  | -0,42 | 0,588082683 | 0,46  | 0,363748564 | 0,31  | 0,8271738   | -1,01 | 0,395932824 | 0,5   | 0,736140152 |
| Mfsd2b  | -0,05 | 0,973588139 | -0,4  | 0,585443341 | 0,96  | 0,366128799 | 1,13  | 0,021708545 | 0,55  | 0,295214279 |
| Mfsd3   | -0,24 | 0,662416763 | -0,19 | 0,722938629 | 0,08  | 0,947207818 | 0,1   | 0,830247309 | -0,39 | 0,702558142 |
| Mfsd4a  | -0,04 | 0,976574175 | -0,17 | 0,881574142 | 0,2   | 0,809137779 | 0,7   | 0,124552073 | -0,26 | 0,619416028 |
| Mfsd4b1 | -0,02 | 0,990894139 | 0,26  | 0,832841509 | -0,11 | 0,905967183 | -0,42 | 0,337075841 | 0,02  | 0,986418729 |
| Mfsd4b2 | 0,14  | 0,78682706  | -0,19 | 0,835393585 | -0,04 | 0,981848891 | 0,37  | 0,408389024 | 0,12  | 0,932742551 |
| Mfsd4b3 | 1,34  | 0,223441106 | 0,14  | 0,843162191 | 0,93  | 0,66899373  | 1,5   | 0,161116825 | -0,96 | 0,172149526 |
| Mfsd4b4 | -0,61 | 0,617280733 | -0,71 | 0,765705056 | 0,19  | 0,925195648 | 1,85  | 0,031624209 | -0,03 | 0,984125319 |
| Mfsd4b5 | -0,71 | 0,194613044 | 0,21  | 0,725783826 | -0,16 | 0,821418477 | 0,19  | 0,838806433 | 0,33  | 0,566248044 |
| Mfsd5   | -0,1  | 0,832696131 | -0,38 | 0,525463389 | 0,37  | 0,404341148 | 0,08  | 0,941639261 | 0,04  | 0,977903513 |
| Mfsd6   | -0,62 | 0,322917499 | 0     | 1           | -0,07 | 0,94940954  | -1,24 | 0,024040886 | -0,16 | 0,86809582  |
| Mfsd6l  | 0,16  | 0,809242228 | -0,21 | 0,829923566 | 0,16  | 0,854115638 | -0,58 | 0,291750085 | -0,11 | 0,953297732 |
| Mfsd7a  | -0,06 | 0,940514265 | -0,08 | 0,934627513 | -0,49 | 0,405394696 | -0,41 | 0,499116639 | -0,12 | 0,934185668 |
| Mfsd7b  | -0,22 | 0,791284141 | 0,11  | 0,815317911 | 0,3   | 0,870542909 | 0,12  | 0,835780773 | 0,2   | 0,763240477 |



|        |       |             |       |             |       |             |       |             |       |             |
|--------|-------|-------------|-------|-------------|-------|-------------|-------|-------------|-------|-------------|
| Mfsd7c | -0,33 | 0,65761852  | -0,08 | 0,882847123 | -0,65 | 0,539159914 | -1,14 | 0,136408628 | -0,03 | 0,980945466 |
| Mfsd8  | -0,01 | 0,994223206 | 0,35  | 0,747707816 | 0,38  | 0,570568062 | -1,17 | 0,060090374 | -0,29 | 0,637318727 |
| Mfsd9  | -0,45 | 0,447068257 | -0,08 | 0,958545812 | -0,3  | 0,821984166 | 0,15  | 0,828125777 | -0,05 | 0,965776227 |
| Mga    | 0,35  | 0,611644482 | -0,16 | 0,805522187 | -0,13 | 0,926845873 | -0,32 | 0,694708058 | -0,03 | 0,980961333 |
| Mgam   | -0,34 | 0,58079696  | 0,21  | 0,789363581 | -0,33 | 0,597054271 | -0,16 | 0,742581363 | 0,17  | 0,905581898 |
| Mgarp  | 0,38  | 0,489042022 | 0,26  | 0,624860312 | 0,16  | 0,856416051 | 0,38  | 0,437892646 | 0,41  | 0,735052158 |
| Mgat1  | -0,26 | 0,62158361  | 0,2   | 0,773969614 | 0,24  | 0,745157152 | -0,03 | 0,961558651 | -0,43 | 0,502234944 |
| Mgat2  | -0,11 | 0,882060783 | -0,09 | 0,891627071 | 0,52  | 0,383195197 | 0,67  | 0,446858732 | 0,07  | 0,959171847 |
| Mgat3  | -0,25 | 0,695313784 | -0,01 | 0,996113371 | -0,24 | 0,770526999 | -0,36 | 0,288372966 | -0,2  | 0,763240477 |
| Mgat4a | -0,52 | 0,296031134 | -0,05 | 0,954024651 | 0,06  | 0,963199274 | 4     | 0,015931357 | 0,59  | 0,820879187 |
| Mgat4b | -0,35 | 0,474293292 | -0,37 | 0,585330659 | 0,54  | 0,471873683 | 1,01  | 0,092863116 | -0,46 | 0,497315775 |
| Mgat4c | 0,85  | 0,189684245 | -0,31 | 0,697307701 | 0,07  | 0,950052494 | 0,48  | 0,370402644 | -0,13 | 0,907836048 |
| Mgat4d | -0,02 | 0,974267399 | -0,02 | 0,987188179 | 0,06  | 0,928438649 | -0,31 | 0,509885588 | -0,17 | 0,816013994 |
| Mgat4e | 0,21  | 0,827233265 | 0,1   | 0,934205257 | 0,09  | 0,941627748 | -0,46 | 0,238935674 | -0,05 | 0,967522546 |
| Mgat5  | -0,59 | 0,242651292 | -0,61 | 0,429168189 | -0,68 | 0,226784152 | 2,29  | 0,012516129 | 0,4   | 0,581802025 |
| Mgat5b | -0,05 | 0,951838266 | 0,23  | 0,703923817 | 0,05  | 0,94940954  | -0,32 | 0,496055182 | 0,06  | 0,950422658 |
| Mgea5  | 0,09  | 0,9124306   | -0,27 | 0,671319666 | 0,03  | 0,966028971 | 0,8   | 0,06391219  | 0,22  | 0,723883531 |
| Mgl2   | 0,3   | 0,603330883 | 0,02  | 0,991023942 | 0,1   | 0,925195648 | 0,26  | 0,525253689 | 0,03  | 0,974145774 |
| Mgl1   | -0,98 | 0,220541198 | -0,68 | 0,152328045 | -0,03 | 0,977967694 | 0,26  | 0,396720422 | -1,39 | 0,013202628 |
| Mgme1  | -0,41 | 0,680776928 | -0,43 | 0,24978864  | -0,03 | 0,99129124  | -1,12 | 0,024477499 | -0,4  | 0,596092228 |
| Mgmt   | -0,12 | 0,873036861 | -0,66 | 0,31069547  | 0,58  | 0,242816655 | 1,35  | 0,014926495 | -0,28 | 0,615512523 |
| Mgp    | 0,06  | 0,98225675  | -0,65 | 0,664787536 | -0,13 | 0,932706021 | -3,83 | 0,007555185 | -0,81 | 0,122922652 |
| Mgrn1  | -0,49 | 0,249194174 | -0,02 | 0,982047684 | 0,19  | 0,752157341 | 0,16  | 0,676359734 | -0,29 | 0,681251409 |
| Mgst1  | 0,98  | 0,321600657 | 0,7   | 0,401222066 | -1,31 | 0,197579894 | -2,35 | 0,008674249 | 0,69  | 0,277891928 |
| Mgst2  | 0,05  | 0,969257166 | -0,11 | 0,894278094 | -0,12 | 0,893858379 | -0,35 | 0,791492345 | 1,15  | 0,254633449 |
| Mgst3  | 0,06  | 0,946509151 | -0,51 | 0,442648588 | -0,36 | 0,676418104 | -1,03 | 0,024833662 | -1,47 | 0,018639064 |
| Mhrt   | 0,07  | 0,913425276 | -0,16 | 0,832369851 | 0,13  | 0,858646182 | -0,19 | 0,619134782 | 0,06  | 0,951646452 |
| Mia    | 0,06  | 0,959963776 | 0,19  | 0,717601192 | 0,45  | 0,440917162 | 0,03  | 0,985865561 | 0,56  | 0,742614391 |
| Mia2   | 0,1   | 0,865776054 | 0,13  | 0,873628464 | 1,06  | 0,347983286 | -0,15 | 0,861675364 | -0,39 | 0,676404522 |
| Mia3   | -0,37 | 0,721378796 | -0,07 | 0,937903497 | 0,45  | 0,602259493 | -0,4  | 0,280843942 | -0,71 | 0,249774523 |
| Miat   | 0,01  | 0,996998625 | -0,21 | 0,859585789 | 0,12  | 0,846622244 | -0,14 | 0,783708375 | -0,21 | 0,732679577 |
| Mib1   | -0,32 | 0,590761099 | 0,12  | 0,829238025 | 0,15  | 0,856425598 | 0     | 1           | -0,26 | 0,78512653  |
| Mib2   | -0,38 | 0,62085984  | 0,23  | 0,84526289  | -0,86 | 0,136189865 | -0,84 | 0,276210999 | -0,75 | 0,432754761 |
| Mical1 | -0,61 | 0,355690795 | -0,45 | 0,457701498 | 0,64  | 0,172601112 | 0,46  | 0,461824013 | -0,06 | 0,956610289 |
| Mical2 | -0,24 | 0,761832919 | -0,3  | 0,557875295 | 0,3   | 0,721369858 | 0,89  | 0,07392351  | -1,04 | 0,067602527 |

|         |       |             |       |             |       |             |       |             |       |             |
|---------|-------|-------------|-------|-------------|-------|-------------|-------|-------------|-------|-------------|
| Mical3  | -0,73 | 0,252418419 | -0,57 | 0,442884795 | 0,67  | 0,260479447 | 0,87  | 0,363947177 | -0,06 | 0,97425848  |
| Micalcl | 0,05  | 0,957142771 | 0,46  | 0,608935198 | -0,12 | 0,911221098 | -0,17 | 0,831660272 | -0,23 | 0,832848337 |
| Micall1 | -0,63 | 0,204609379 | -0,3  | 0,47742142  | 0,42  | 0,554535106 | -0,12 | 0,752284882 | 0,13  | 0,845253494 |
| Micall2 | -0,4  | 0,410438497 | -0,39 | 0,729741948 | 0,97  | 0,041860694 | 1     | 0,039663731 | -0,41 | 0,403592341 |
| Micu1   | -0,41 | 0,550353963 | 0,02  | 0,996381849 | -0,13 | 0,895058842 | -0,11 | 0,839891505 | 0,22  | 0,83129383  |
| Micu2   | -0,4  | 0,592682585 | -0,1  | 0,904346817 | 0,46  | 0,57717258  | 0,84  | 0,122862682 | 0,26  | 0,726042963 |
| Micu3   | -0,12 | 0,939989529 | -0,11 | 0,941258271 | -0,52 | 0,402409115 | -0,38 | 0,69938772  | 0,53  | 0,628127128 |
| Mid1    | 0,11  | 0,843029805 | 0,4   | 0,608020577 | -0,28 | 0,79007666  | 0,57  | 0,342522526 | -0,14 | 0,886693819 |
| Mid1ip1 | -0,61 | 0,341853862 | -0,53 | 0,732847182 | -0,07 | 0,963527046 | -0,2  | 0,569727306 | 0,03  | 0,979456872 |
| Mid2    | -0,36 | 0,602160482 | 0,34  | 0,526459535 | -0,06 | 0,969262382 | -0,61 | 0,325923875 | -0,06 | 0,95985938  |
| Midn    | -0,1  | 0,832696131 | 0,05  | 0,948564384 | 0,07  | 0,924836701 | -0,48 | 0,134852044 | -0,12 | 0,861002679 |
| Mief1   | -0,24 | 0,671077469 | 0,21  | 0,716393249 | -0,05 | 0,970273084 | -0,38 | 0,350906518 | -0,67 | 0,198883002 |
| Mief2   | -0,33 | 0,385920627 | 0,14  | 0,926210163 | -0,36 | 0,703647945 | 0,38  | 0,443263952 | -0,19 | 0,808145024 |
| Mien1   | 0,14  | 0,736648392 | 0,04  | 0,955302758 | 0,16  | 0,858393835 | 0,13  | 0,866389603 | -0,06 | 0,961281513 |
| Mier1   | 0,16  | 0,778869381 | 0,22  | 0,751116121 | 0,04  | 0,965539887 | -0,38 | 0,507929697 | 0,24  | 0,773401088 |
| Mier2   | -0,02 | 0,98782208  | 0,5   | 0,367968212 | 0,28  | 0,743653977 | 0,47  | 0,402823171 | 0,18  | 0,835099829 |
| Mier3   | 0,08  | 0,922341271 | 0,04  | 0,975427696 | 0,21  | 0,787094995 | -0,56 | 0,112780918 | 0,27  | 0,590339443 |
| Mif     | 0,46  | 0,209702499 | -0,2  | 0,701492683 | 0,13  | 0,877598693 | 1,49  | 0,013848007 | -0,1  | 0,930287169 |
| Mif4gd  | 0,44  | 0,578083153 | -0,03 | 0,958856577 | 0,13  | 0,804785961 | -0,57 | 0,166770581 | 0,07  | 0,940092696 |
| Miip    | -0,06 | 0,941362975 | 0,34  | 0,60189244  | 0,25  | 0,706842882 | -0,21 | 0,561656192 | 0,11  | 0,876714296 |
| Mill1   | 0,09  | 0,862908528 | 0,18  | 0,817367084 | -0,07 | 0,944078985 | 0,06  | 0,928155146 | 0,31  | 0,583279373 |
| Mill2   | 0,52  | 0,499608021 | 0,05  | 0,916496897 | -0,18 | 0,919309335 | -2,31 | 0,003907268 | 0,05  | 0,959398085 |
| Milr1   | 0,27  | 0,735490227 | -0,09 | 0,864680059 | 0,22  | 0,693217111 | 0,18  | 0,811871922 | 0,19  | 0,830268209 |
| Mina    | -0,29 | 0,819634768 | -0,79 | 0,303685999 | 0,05  | 0,981207238 | 0,97  | 0,272621633 | -0,41 | 0,710098871 |
| Mink1   | -0,37 | 0,59421831  | -0,25 | 0,541570411 | -0,04 | 0,973732268 | -0,42 | 0,210967097 | -0,33 | 0,4940585   |
| Minos1  | -0,11 | 0,835016158 | -0,16 | 0,762909702 | 0,06  | 0,955874638 | 0,07  | 0,922246542 | -0,6  | 0,32673984  |
| Minpp1  | 0,32  | 0,536802237 | 0     | 1           | -0,2  | 0,841464759 | 0,73  | 0,272589045 | 0,16  | 0,9039404   |
| Mios    | -0,29 | 0,823225169 | -0,02 | 0,983613535 | -0,4  | 0,501765356 | -0,21 | 0,806596364 | -0,12 | 0,913274952 |
| Miox    | -0,39 | 0,469049834 | 0,32  | 0,800191117 | -0,08 | 0,925245169 | -2,3  | 0,01888325  | 0,04  | 0,982577187 |
| Mip     | -0,02 | 0,979362045 | -0,01 | 0,996865461 | -0,08 | 0,923520317 | -0,27 | 0,65051636  | -0,38 | 0,603798473 |
| Mipep   | -0,53 | 0,61200942  | -0,69 | 0,487771533 | 0,31  | 0,774812688 | 0,57  | 0,490205919 | 0,18  | 0,884248437 |
| Mipol1  | -0,16 | 0,931456925 | 0,03  | 0,981236932 | -0,63 | 0,38497941  | -0,91 | 0,070053625 | 0,92  | 0,096920464 |
| Mir100  | 0,08  | 0,873113228 | 0,04  | 0,926353869 | -0,03 | 0,969476711 | -0,17 | 0,75049267  | -0,16 | 0,876418697 |
| Mir101b | -0,13 | 0,767389211 | -0,02 | 0,975142092 | -0,08 | 0,887033862 | -0,01 | 0,99017416  | -0,06 | 0,948759136 |
| Mir101c | 0,09  | 0,867243066 | 0,08  | 0,875337397 | 0,21  | 0,681064439 | -0,05 | 0,911958998 | -0,05 | 0,952190189 |

|             |       |             |       |             |       |             |       |             |       |             |
|-------------|-------|-------------|-------|-------------|-------|-------------|-------|-------------|-------|-------------|
| Mir103-1    | 0,49  | 0,602160482 | 0,17  | 0,660815642 | -0,11 | 0,909963525 | -0,03 | 0,967047406 | -0,01 | 0,990633766 |
| Mir103-2    | -0,89 | 0,214430522 | -0,58 | 0,750709388 | -0,35 | 0,911506558 | -0,43 | 0,90213506  | -0,61 | 0,861218943 |
| Mir105      | 0,06  | 0,900062452 | -0,01 | 0,987162042 | 0     | 0,997726009 | 0,01  | 0,990388217 | 0,09  | 0,932846086 |
| Mir106b     | -0,27 | 0,663760226 | -0,11 | 0,837489456 | -0,43 | 0,665034403 | 0,02  | 0,958927    | 0,04  | 0,966474766 |
| Mir107      | -0,08 | 0,920244507 | -0,18 | 0,864171096 | -0,46 | 0,415588175 | 0,08  | 0,900250284 | -0,18 | 0,818041383 |
| Mir10a      | 0,25  | 0,776839834 | 0,23  | 0,775155136 | -0,13 | 0,882540073 | -0,18 | 0,677272877 | 0,71  | 0,765327693 |
| Mir10b      | -0,59 | 0,314547808 | -0,24 | 0,701043773 | 0,36  | 0,467096288 | 0,57  | 0,226158677 | 0,26  | 0,806799849 |
| Mir1187     | -0,04 | 0,936139343 | 0,01  | 0,994137877 | -0,03 | 0,964654526 | -0,02 | 0,961963439 | -0,13 | 0,84440721  |
| Mir1188     | 0,04  | 0,935632377 | 0,07  | 0,880473303 | 0,13  | 0,8290371   | 0,02  | 0,971338071 | 0,13  | 0,860591136 |
| Mir1190     | 0     | 0,997588772 | -0,08 | 0,858860016 | -0,43 | 0,514610288 | 0,19  | 0,825332212 | -0,11 | 0,918288793 |
| Mir1191     | 0,05  | 0,972701787 | -0,26 | 0,748874675 | -0,3  | 0,679406979 | 0,07  | 0,936482652 | 0,56  | 0,48229889  |
| Mir1192     | 0,01  | 0,994865169 | -0,34 | 0,575260771 | -0,66 | 0,47804917  | -0,82 | 0,056274276 | -0,41 | 0,601481833 |
| Mir1193     | 0,06  | 0,910176431 | 0,02  | 0,978547588 | 0,06  | 0,938291859 | -0,02 | 0,972244785 | 0,2   | 0,792234713 |
| Mir1195     | 0,25  | 0,468767852 | 0,06  | 0,919762719 | -0,09 | 0,887769873 | 0,03  | 0,958223234 | 0,16  | 0,843403563 |
| Mir1197     | 0,06  | 0,892124736 | 0     | 0,999395995 | -0,07 | 0,902672106 | -0,12 | 0,75887854  | -0,22 | 0,730951829 |
| Mir1198     | 0,2   | 0,728608769 | 0,25  | 0,536246395 | 0,15  | 0,845291351 | -0,05 | 0,899335603 | 0,48  | 0,264131115 |
| Mir122      | -0,24 | 0,681657169 | 0,02  | 0,9759335   | -0,24 | 0,602065866 | -0,04 | 0,921600281 | 0,04  | 0,955910202 |
| Mir1247     | 0,27  | 0,546019769 | -0,3  | 0,438149324 | -0,24 | 0,683917899 | 0,05  | 0,959958662 | -0,05 | 0,961749007 |
| Mir124a-1hg | -0,06 | 0,954487406 | 0,29  | 0,702757763 | 0,14  | 0,929155794 | 0,09  | 0,873846693 | 0,33  | 0,773401088 |
| Mir124a-2   | 0,15  | 0,869565514 | -0,6  | 0,272116352 | 0,13  | 0,87499423  | 0,52  | 0,296322125 | 0,33  | 0,541805598 |
| Mir124a-3   | 0,09  | 0,886680488 | -0,22 | 0,671319666 | 0,1   | 0,872900604 | 0,2   | 0,604909385 | 0,05  | 0,950056013 |
| Mir1251     | -0,06 | 0,932354771 | 0,13  | 0,782652703 | -0,21 | 0,705492321 | 0,01  | 0,985936439 | 0,1   | 0,874716101 |
| Mir125a     | -0,08 | 0,892559851 | -0,05 | 0,932292974 | 0,63  | 0,305273726 | -0,22 | 0,598473186 | -0,2  | 0,881135847 |
| Mir125b-1   | 0,12  | 0,864526424 | -0,38 | 0,610227242 | -0,38 | 0,483761569 | 0,16  | 0,80795564  | 0,16  | 0,836715889 |
| Mir125b-2   | 0,29  | 0,636429575 | 0,06  | 0,909079807 | -0,12 | 0,82000536  | 0     | 1           | 0,13  | 0,840952901 |
| Mir1264     | 0,02  | 0,964318719 | 0,11  | 0,8515863   | -0,09 | 0,887630371 | 0     | 1           | 0,09  | 0,919873299 |
| Mir126a     | -0,32 | 0,500870793 | 0,08  | 0,862407156 | -1,78 | 0,252464368 | -1,7  | 0,244995718 | -0,61 | 0,728578071 |
| Mir127      | 0,1   | 0,856984761 | -0,02 | 0,966717367 | 0,1   | 0,867152476 | -0,04 | 0,926898299 | -0,32 | 0,590339443 |
| Mir128-1    | 0,26  | 0,802427928 | -0,15 | 0,826636886 | 0,41  | 0,525679529 | 0,1   | 0,767568252 | 0,44  | 0,536683014 |
| Mir128-2    | 0,4   | 0,656726345 | -0,04 | 0,982047684 | -0,24 | 0,809137779 | -0,49 | 0,372769987 | -0,01 | 0,992694729 |
| Mir129-1    | 0,31  | 0,571904456 | 0     | 1           | -0,04 | 0,944441051 | 0,05  | 0,949239972 | 0,16  | 0,865258929 |
| Mir129-2    | 0,2   | 0,731173847 | 0,05  | 0,91282847  | -0,19 | 0,684455958 | -0,14 | 0,791822555 | 0,3   | 0,623214829 |
| Mir1298     | 0,24  | 0,568885525 | 0     | 1           | -0,15 | 0,841563482 | 0,01  | 0,979420434 | 0,16  | 0,806478588 |
| Mir130a     | 0,46  | 0,791150064 | 0,03  | 0,946599376 | 0,04  | 0,968742139 | -0,11 | 0,742706747 | -0,04 | 0,977903513 |
| Mir130b     | 0,3   | 0,534017117 | 0,24  | 0,703923817 | -0,24 | 0,779083791 | 0,56  | 0,185628374 | 0,46  | 0,614310952 |

|           |       |             |       |             |       |             |       |             |       |             |
|-----------|-------|-------------|-------|-------------|-------|-------------|-------|-------------|-------|-------------|
| Mir132    | 0,09  | 0,841267394 | 0,14  | 0,800821935 | -0,14 | 0,809137779 | -0,09 | 0,835214439 | -0,03 | 0,982175252 |
| Mir133a-1 | 0,12  | 0,892124736 | 0,19  | 0,761635785 | -0,05 | 0,947460329 | 0     | 0,998781708 | 0,09  | 0,900126162 |
| Mir133a-2 | -0,56 | 0,189736931 | -0,03 | 0,986742203 | -0,1  | 0,934444634 | 0,38  | 0,318560226 | 0,28  | 0,720742956 |
| Mir133b   | 0,18  | 0,730385117 | -0,23 | 0,677026666 | -0,17 | 0,791940256 | -0,08 | 0,854824898 | 0,15  | 0,86229485  |
| Mir135a-1 | 0,12  | 0,85515494  | -0,03 | 0,961657201 | -1,05 | 0,533440698 | 0,21  | 0,599774385 | 0,11  | 0,884104506 |
| Mir135a-2 | 0,13  | 0,795659022 | -0,03 | 0,958545812 | 0,03  | 0,969476711 | -0,01 | 0,977051333 | 0,12  | 0,866623051 |
| Mir135b   | -0,01 | 0,992748202 | 0,07  | 0,891749049 | 0,27  | 0,702677589 | 0,02  | 0,983166423 | 0,28  | 0,699096526 |
| Mir136    | -0,06 | 0,919567534 | 0,05  | 0,926157704 | 0,01  | 0,993379272 | 0     | 0,994512187 | 0,04  | 0,954565959 |
| Mir137    | 0,06  | 0,897717279 | 0,1   | 0,817367084 | 0,03  | 0,9728699   | -0,02 | 0,962670023 | -0,12 | 0,87383373  |
| Mir138-1  | -0,12 | 0,801665973 | 0,15  | 0,754578715 | -0,09 | 0,894339966 | 0,07  | 0,838825534 | -0,25 | 0,690439476 |
| Mir138-2  | -0,37 | 0,507090099 | -0,38 | 0,773751321 | 0     | 0,999931921 | 0,46  | 0,609415126 | 0,02  | 0,981079016 |
| Mir139    | -0,15 | 0,741182094 | 0,02  | 0,986881058 | -0,13 | 0,838289412 | -0,16 | 0,853963723 | -0,14 | 0,900710858 |
| Mir140    | 0,42  | 0,738714467 | 0,16  | 0,894669822 | 0,09  | 0,872313115 | 0,03  | 0,949166455 | 0,81  | 0,510444912 |
| Mir141    | -0,07 | 0,886680488 | -0,03 | 0,953631922 | 0     | 0,998597345 | 0,27  | 0,378940425 | 0,18  | 0,765340194 |
| Mir142    | 0,58  | 0,315731944 | 0,05  | 0,956278122 | -0,64 | 0,409611548 | -0,36 | 0,564693464 | 0,11  | 0,91423979  |
| Mir142hg  | 0,19  | 0,742002256 | 0,16  | 0,88741189  | -0,41 | 0,397324055 | -0,05 | 0,911258809 | 0,26  | 0,682134021 |
| Mir143    | 0,17  | 0,752042687 | -0,08 | 0,881339866 | -0,21 | 0,746290585 | -0,25 | 0,757267334 | -0,25 | 0,834743747 |
| Mir143hg  | -0,19 | 0,690495549 | 0,05  | 0,943713379 | 0,08  | 0,936708644 | -0,15 | 0,831151724 | -0,24 | 0,745574572 |
| Mir144    | 0,02  | 0,97839288  | 0,06  | 0,900801202 | -0,01 | 0,989513871 | -0,07 | 0,866757253 | -0,01 | 0,991480325 |
| Mir145a   | 0,01  | 0,993728727 | 0,02  | 0,963369162 | -0,09 | 0,90283613  | -0,26 | 0,575586039 | 0,01  | 0,992406971 |
| Mir146    | 0,25  | 0,666820752 | 0,24  | 0,747707816 | 0,02  | 0,974887915 | -0,07 | 0,858484804 | 0,42  | 0,481083276 |
| Mir146b   | 0,18  | 0,721432139 | -0,01 | 0,983071427 | -0,05 | 0,951601163 | 0,07  | 0,859859031 | -0,24 | 0,674861155 |
| Mir148a   | -0,15 | 0,701391957 | 0     | 1           | 0     | 0,997779738 | 0,1   | 0,805169421 | 0,08  | 0,908981592 |
| Mir148b   | 0,07  | 0,916211561 | -0,51 | 0,668839557 | -0,18 | 0,751090942 | 0,48  | 0,579176433 | -0,01 | 0,98847659  |
| Mir149    | 0,06  | 0,928944712 | -0,02 | 0,981586987 | 0,06  | 0,948473626 | 0,02  | 0,968309889 | -0,22 | 0,731865047 |
| Mir150    | 0,02  | 0,966775766 | -0,28 | 0,739060346 | -0,14 | 0,871283127 | 0,15  | 0,684247831 | -0,38 | 0,587305934 |
| Mir151    | -0,68 | 0,430696208 | -0,57 | 0,384803204 | 0,08  | 0,948637233 | 0,21  | 0,722766722 | -0,13 | 0,913553402 |
| Mir152    | -0,27 | 0,698231814 | 0     | 1           | -0,05 | 0,940068173 | -0,06 | 0,889835466 | -0,29 | 0,629488062 |
| Mir153    | 0,15  | 0,714662474 | -0,04 | 0,96845995  | 0,11  | 0,865145801 | 0     | 1           | -0,04 | 0,959398085 |
| Mir154    | 0,73  | 0,611774824 | 0,08  | 0,88928164  | -0,11 | 0,848462153 | -0,01 | 0,976405026 | -0,18 | 0,796146369 |
| Mir155hg  | 1,32  | 0,04197452  | 0,87  | 0,107449087 | -0,81 | 0,419537272 | 1,06  | 0,361232086 | 0,62  | 0,598963515 |
| Mir15a    | 0,87  | 0,469307745 | -0,31 | 0,820137069 | 0,2   | 0,889881053 | 0,78  | 0,560311751 | 0,91  | 0,471919432 |
| Mir15b    | -0,01 | 0,98456417  | 0,2   | 0,707806354 | 0,02  | 0,973789361 | 0,01  | 0,981610833 | 0,78  | 0,621508735 |
| Mir16-1   | -0,09 | 0,932110766 | -0,17 | 0,74760299  | -0,75 | 0,38497941  | 0,25  | 0,411913475 | 0,22  | 0,779912857 |
| Mir16-2   | 0,47  | 0,272587269 | 0,21  | 0,752804236 | 0,21  | 0,798711591 | 0,22  | 0,680255321 | 0,62  | 0,330057248 |

|           |       |             |       |             |       |             |       |             |       |             |
|-----------|-------|-------------|-------|-------------|-------|-------------|-------|-------------|-------|-------------|
| Mir17     | 0,49  | 0,761919089 | -0,35 | 0,606079082 | -0,11 | 0,940489823 | -0,05 | 0,982613682 | -0,57 | 0,735565325 |
| Mir17hg   | 0,39  | 0,460301697 | 0,12  | 0,882589938 | -0,78 | 0,404341148 | 0,49  | 0,786750698 | 0,79  | 0,587915673 |
| Mir18     | 1,22  | 0,214910308 | -0,59 | 0,740618526 | -0,54 | 0,800142198 | -0,48 | 0,800728247 | -0,23 | 0,935812103 |
| Mir181a-1 | 0,13  | 0,762165257 | -0,01 | 0,993068441 | -0,07 | 0,954550124 | 0,07  | 0,873610553 | -0,22 | 0,779920985 |
| Mir181a-2 | 0,03  | 0,969577981 | -0,33 | 0,57919453  | 0,04  | 0,968742139 | 0,39  | 0,449617998 | -0,13 | 0,880552266 |
| Mir181b-1 | 0,07  | 0,964272364 | 0,23  | 0,853162838 | 0,26  | 0,89204807  | 0,02  | 0,967216871 | 0,15  | 0,816171453 |
| Mir181b-2 | -0,08 | 0,902939265 | 0,07  | 0,894571363 | -0,56 | 0,460945976 | -0,13 | 0,828644629 | -0,01 | 0,992607235 |
| Mir181c   | -0,1  | 0,903817676 | 0,17  | 0,732847182 | 0,25  | 0,675235188 | -0,21 | 0,800572236 | -0,1  | 0,943668392 |
| Mir181d   | 0,08  | 0,909779793 | -0,09 | 0,858935338 | -0,17 | 0,774337646 | -0,06 | 0,90300812  | 0,08  | 0,932846086 |
| Mir182    | 0     | 0,996219097 | 0,07  | 0,887752277 | -0,03 | 0,977126842 | -0,08 | 0,841707456 | 0,05  | 0,950267521 |
| Mir183    | 0,03  | 0,949931783 | 0,03  | 0,950415432 | -0,11 | 0,844258774 | -0,03 | 0,958172386 | 0,2   | 0,77360786  |
| Mir184    | 0,12  | 0,770273483 | 0,02  | 0,977206884 | -0,27 | 0,618381447 | 0,33  | 0,540951246 | 0,38  | 0,573106355 |
| Mir185    | 0,27  | 0,600952042 | 0,08  | 0,901306787 | -0,19 | 0,735121124 | -0,01 | 0,983166423 | 0,06  | 0,940092696 |
| Mir186    | 0,45  | 0,387403601 | -0,17 | 0,84314495  | 0,3   | 0,841563482 | 0,3   | 0,667701895 | -0,58 | 0,442040974 |
| Mir187    | -0,22 | 0,683531628 | -0,07 | 0,943915456 | -0,02 | 0,983471086 | 0,32  | 0,297209799 | -0,12 | 0,868767214 |
| Mir188    | 0,05  | 0,934802231 | -0,06 | 0,934294134 | -0,4  | 0,660920525 | 0,17  | 0,625044944 | 0,14  | 0,817563348 |
| Mir1895   | 0,08  | 0,902628825 | -0,07 | 0,932292974 | -0,09 | 0,917672398 | 0,04  | 0,946205705 | -0,07 | 0,936204843 |
| Mir1896   | -0,35 | 0,537328866 | -0,25 | 0,771406932 | -0,18 | 0,767822182 | 0,37  | 0,529366123 | 0,21  | 0,794006294 |
| Mir18b    | -0,01 | 0,98225675  | 0,01  | 0,989873399 | -0,02 | 0,984879454 | -0,08 | 0,857910103 | 0,02  | 0,982321176 |
| Mir1900   | 0,3   | 0,775784928 | -0,11 | 0,955242777 | 0,05  | 0,970398561 | 0,06  | 0,963752888 | 0     | 0,997299415 |
| Mir1901   | -0,19 | 0,764189777 | -0,51 | 0,492007453 | -0,24 | 0,803333635 | -0,24 | 0,900250284 | 0,06  | 0,983469081 |
| Mir1904   | -0,2  | 0,764288636 | -0,04 | 0,946599376 | -0,32 | 0,723037215 | -0,41 | 0,523589033 | -0,37 | 0,720844381 |
| Mir1905   | 0,07  | 0,948087131 | -0,23 | 0,855713502 | -0,48 | 0,550144055 | -0,06 | 0,934980759 | -0,44 | 0,462918176 |
| Mir190b   | 0,01  | 0,98701986  | 0,03  | 0,964419013 | -0,25 | 0,584320897 | -0,13 | 0,782526829 | -0,06 | 0,948163009 |
| Mir191    | 0,17  | 0,838208309 | 0,05  | 0,933320126 | -0,67 | 0,673968019 | 0,25  | 0,78925905  | 0,14  | 0,911975292 |
| Mir1912   | 0,08  | 0,892124736 | 0,06  | 0,919602924 | -0,05 | 0,950076566 | -0,02 | 0,972584224 | 0,19  | 0,778887366 |
| Mir192    | 0,1   | 0,944652244 | 0,08  | 0,883895522 | 0,13  | 0,909975745 | -1,05 | 0,747003908 | -0,77 | 0,850590382 |
| Mir1927   | 0,31  | 0,793166737 | 0,28  | 0,717721153 | 0,03  | 0,973802765 | -0,01 | 0,983166423 | 0,25  | 0,731527639 |
| Mir1928   | 0,09  | 0,898746854 | -0,27 | 0,565159043 | -0,06 | 0,918291931 | 0,03  | 0,958889858 | 0,23  | 0,726042963 |
| Mir1929   | 0,47  | 0,689725397 | 0,67  | 0,774278866 | -0,03 | 0,993379272 | 0,08  | 0,843906148 | 0,04  | 0,97425848  |
| Mir1930   | -0,54 | 0,61200942  | -0,23 | 0,947107147 | 0,37  | 0,493914485 | 0,79  | 0,618254643 | -0,15 | 0,918465043 |
| Mir1931   | 0,27  | 0,74672311  | -0,16 | 0,952293161 | 0,18  | 0,935778422 | -0,47 | 0,68890425  | -0,26 | 0,858526809 |
| Mir1932   | -0,02 | 0,991919022 | 0,6   | 0,733708652 | -0,75 | 0,469768051 | -0,52 | 0,757267334 | 0,71  | 0,625751363 |
| Mir1933   | 0,05  | 0,950897622 | 0,06  | 0,910193022 | 0,07  | 0,970939073 | -0,97 | 0,728291963 | -0,69 | 0,81431215  |
| Mir1934   | 0,07  | 0,931633998 | -0,07 | 0,953507825 | -0,32 | 0,735545792 | 0,02  | 0,962043341 | -0,24 | 0,731865047 |

|           |       |             |       |             |       |             |       |             |       |             |
|-----------|-------|-------------|-------|-------------|-------|-------------|-------|-------------|-------|-------------|
| Mir1936   | 0,22  | 0,559210112 | -0,01 | 0,993398521 | -0,08 | 0,904573436 | 0,02  | 0,967866794 | 0,05  | 0,950308536 |
| Mir1938   | 0,13  | 0,874676538 | 0,72  | 0,187729631 | -0,5  | 0,372318571 | -0,84 | 0,216607755 | 0,35  | 0,662029815 |
| Mir193a   | 0,4   | 0,497555755 | -0,07 | 0,882589938 | -0,38 | 0,543542033 | 0,34  | 0,442066053 | 0,46  | 0,330314966 |
| Mir193b   | 0,36  | 0,673291416 | 0,08  | 0,858672146 | 0,03  | 0,977934465 | -0,11 | 0,922740736 | -0,23 | 0,86229485  |
| Mir1941   | 0,36  | 0,294535935 | 0,01  | 0,985291538 | -0,57 | 0,326112876 | -1,51 | 0,247827143 | -0,6  | 0,719122515 |
| Mir194-1  | -0,03 | 0,96097593  | -0,04 | 0,959826044 | 0,1   | 0,909371204 | 0,15  | 0,684896871 | -0,18 | 0,776907684 |
| Mir1942   | 0,06  | 0,899314698 | -0,07 | 0,863064855 | -0,16 | 0,733423502 | 0     | 1           | -0,04 | 0,9599431   |
| Mir194-2  | 0,09  | 0,879080828 | -0,28 | 0,756267547 | -0,13 | 0,923350407 | -0,16 | 0,717305989 | -0,21 | 0,763240477 |
| Mir1943   | 0,16  | 0,800851935 | -0,23 | 0,790939978 | 0,21  | 0,811564759 | 0,03  | 0,957573971 | -0,13 | 0,844079844 |
| Mir1945   | -0,12 | 0,877498793 | -0,33 | 0,643743213 | 0,46  | 0,391906689 | 0,52  | 0,267130749 | 0,29  | 0,705953802 |
| Mir1946a  | 0,34  | 0,422775151 | 0,5   | 0,297241815 | -0,18 | 0,770526999 | -0,2  | 0,656052937 | 0,76  | 0,16306224  |
| Mir1946b  | 0,15  | 0,84900712  | 0,14  | 0,748874675 | -0,3  | 0,660920525 | -0,62 | 0,545758277 | -0,01 | 0,992671375 |
| Mir1947   | 0,09  | 0,840909921 | -0,1  | 0,905740443 | 0,11  | 0,877598693 | 0,43  | 0,445374952 | 0,09  | 0,912872102 |
| Mir1948   | 0,01  | 0,986967942 | -0,02 | 0,9860901   | 0,51  | 0,852300912 | -0,4  | 0,736939682 | -0,36 | 0,797167184 |
| Mir1949   | -0,85 | 0,760032001 | -0,75 | 0,354604974 | 0,05  | 0,987390039 | 2,27  | 0,058564376 | 0,28  | 0,856900046 |
| Mir1950   | 0,11  | 0,797266879 | -0,04 | 0,945980281 | 0,33  | 0,603364239 | -0,15 | 0,692923543 | -0,11 | 0,879316255 |
| Mir1951   | 0,6   | 0,343457563 | -0,01 | 0,98459889  | -0,19 | 0,79692015  | -0,28 | 0,624360828 | -0,03 | 0,983469081 |
| Mir1952   | 0,02  | 0,970875252 | 0     | 1           | -0,36 | 0,527929204 | 0,13  | 0,74417234  | 0,15  | 0,859663155 |
| Mir1953   | 0,3   | 0,637135317 | -0,04 | 0,967338233 | 0     | 0,998479656 | -0,07 | 0,932437932 | 0,46  | 0,585001926 |
| Mir1954   | 0,04  | 0,955321816 | 0,07  | 0,898154642 | -0,35 | 0,433081727 | -0,41 | 0,407317002 | 0,04  | 0,968952017 |
| Mir1955   | 0,34  | 0,586458491 | 0,22  | 0,881113709 | -1,12 | 0,406513019 | -0,24 | 0,910400971 | 0,19  | 0,940438527 |
| Mir1956   | -0,06 | 0,918693402 | -0,02 | 0,980615989 | 0,06  | 0,925417014 | -0,1  | 0,886903189 | -0,03 | 0,981439632 |
| Mir1957a  | -0,44 | 0,537328866 | 1     | 0,131076642 | -0,47 | 0,736422567 | 0,46  | 0,825294146 | -0,28 | 0,913553402 |
| Mir1958   | 0,03  | 0,973545171 | -0,11 | 0,87892334  | -0,12 | 0,823823322 | 0     | 0,999809258 | 0,11  | 0,881968395 |
| Mir195a   | 0,22  | 0,665037431 | 0,03  | 0,991507752 | -0,24 | 0,731959853 | -0,03 | 0,95852873  | 0,34  | 0,489004857 |
| Mir1960   | 0,69  | 0,434135135 | 0,07  | 0,95098509  | -0,11 | 0,924910686 | 0,07  | 0,87811903  | 0,73  | 0,103208118 |
| Mir1961   | -0,1  | 0,827055517 | 0     | 1           | -0,04 | 0,956232887 | -0,03 | 0,945619692 | -0,02 | 0,979392852 |
| Mir1962   | -0,95 | 0,632053719 | -0,47 | 0,367968212 | -0,47 | 0,854599398 | 1,48  | 0,057480086 | 0,5   | 0,72483996  |
| Mir1963   | -0,19 | 0,648017341 | -0,09 | 0,86245211  | -0,2  | 0,723987482 | 0,09  | 0,847673187 | 0     | 0,999363756 |
| Mir1964   | 0,23  | 0,59771006  | -0,17 | 0,754578715 | 0     | 0,997239086 | 0,01  | 0,990392071 | -0,05 | 0,948759136 |
| Mir1966   | 0,33  | 0,743593944 | 0,51  | 0,496223407 | 0,44  | 0,572810613 | -0,35 | 0,367238215 | 0,38  | 0,666026291 |
| Mir1967   | -0,53 | 0,716985606 | -0,35 | 0,552962413 | -2,64 | 0,161469949 | 0,22  | 0,778817721 | 0,71  | 0,727904814 |
| Mir1968   | 0,33  | 0,519304068 | 0,07  | 0,900338519 | -0,47 | 0,390032335 | -0,23 | 0,67828223  | -0,08 | 0,947437555 |
| Mir1969   | -0,04 | 0,965350029 | 0,04  | 0,95429671  | 0,09  | 0,944441051 | -0,21 | 0,626636728 | -0,18 | 0,763240477 |
| Mir196a-1 | -0,11 | 0,907844906 | 0,01  | 0,993221425 | -0,05 | 0,947034823 | -0,14 | 0,827026984 | 0,04  | 0,983617617 |

|           |       |             |       |             |       |             |       |             |       |             |
|-----------|-------|-------------|-------|-------------|-------|-------------|-------|-------------|-------|-------------|
| Mir196a-2 | 0,15  | 0,813220024 | -0,12 | 0,818871477 | -0,37 | 0,49993137  | 0,3   | 0,452631406 | 0,02  | 0,980945466 |
| Mir1970   | 0,32  | 0,621072378 | 0,07  | 0,9344441   | 0,05  | 0,967767582 | -0,04 | 0,952797297 | 0,34  | 0,602231893 |
| Mir1971   | -0,05 | 0,920821426 | 0,09  | 0,844500324 | 0,1   | 0,900347352 | -0,09 | 0,816901896 | -0,2  | 0,760555206 |
| Mir1981   | -1,02 | 0,271767062 | 0,64  | 0,571014364 | -1,73 | 0,067624618 | -0,33 | 0,699292828 | -0,19 | 0,869904784 |
| Mir1983   | 0,13  | 0,790688112 | 0,04  | 0,969296652 | -0,04 | 0,962459789 | 0,02  | 0,967866794 | 0,2   | 0,745574572 |
| Mir199a-1 | 0,12  | 0,841140165 | 0,13  | 0,928134372 | -0,22 | 0,783326867 | -0,04 | 0,962670023 | -0,15 | 0,866285506 |
| Mir199b   | 0,03  | 0,949362206 | 0     | 1           | -0,06 | 0,929871006 | -0,12 | 0,833418645 | -0,18 | 0,805277254 |
| Mir19a    | 0,99  | 0,628802144 | 0,38  | 0,565639972 | -0,57 | 0,808065828 | -0,96 | 0,712869858 | 0,19  | 0,960108878 |
| Mir19b-1  | 0,19  | 0,895031891 | -0,13 | 0,949187849 | 0,1   | 0,903918012 | 0,33  | 0,628198543 | 0,18  | 0,86809582  |
| Mir19b-2  | -0,13 | 0,803557792 | 0,03  | 0,961370411 | -0,16 | 0,805783058 | 0,04  | 0,919126119 | -0,2  | 0,746799932 |
| Mir1a-1   | -0,06 | 0,922118639 | 0     | 0,998649612 | 0,21  | 0,737241227 | -0,02 | 0,968940311 | 0,03  | 0,975119065 |
| Mir1a-2   | -0,09 | 0,848420383 | 0,14  | 0,790098472 | -0,06 | 0,940335002 | 0,09  | 0,821950592 | 0,22  | 0,68987325  |
| Mir1b     | 1,31  | 0,448406902 | -1,03 | 0,348856843 | 0,07  | 0,972708325 | 0,32  | 0,85301747  | -0,06 | 0,979456872 |
| Mir200a   | 0,18  | 0,640414995 | 0,01  | 0,984962061 | -0,34 | 0,507095234 | 0,04  | 0,930116111 | 0,21  | 0,746431548 |
| Mir200b   | 0,43  | 0,397054492 | -0,01 | 0,996113371 | 0,09  | 0,9241587   | 0,13  | 0,782438695 | -0,03 | 0,976743304 |
| Mir200c   | -0,19 | 0,791150064 | 0,09  | 0,876499985 | -0,28 | 0,589103152 | -0,13 | 0,842011593 | -0,18 | 0,763240477 |
| Mir201    | 0,25  | 0,578185633 | -0,17 | 0,706052275 | -0,05 | 0,949135765 | 0,04  | 0,943143586 | -0,23 | 0,675282484 |
| Mir202    | 0,43  | 0,64625581  | 0,04  | 0,941258271 | 0,09  | 0,893455203 | 0,05  | 0,92289757  | 0,14  | 0,8897371   |
| Mir203    | -0,01 | 0,982703709 | -0,01 | 0,981758111 | -0,06 | 0,934354994 | -0,14 | 0,75817228  | 0,03  | 0,979456872 |
| Mir204    | 0     | 0,996998625 | 0,08  | 0,869822923 | -0,2  | 0,751090942 | 0,1   | 0,820103742 | 0,75  | 0,677222415 |
| Mir205    | 0,08  | 0,908108677 | -0,31 | 0,62078382  | -0,01 | 0,990699622 | 0,14  | 0,773990463 | 0,03  | 0,97872616  |
| Mir206    | 0,08  | 0,882500171 | 0,15  | 0,726849813 | -0,03 | 0,970212978 | -0,01 | 0,985627977 | 0,07  | 0,933759514 |
| Mir208a   | 0,02  | 0,975469067 | -0,09 | 0,842663656 | -0,4  | 0,520444404 | 0,06  | 0,891764078 | 0,12  | 0,872417427 |
| Mir208b   | 0,04  | 0,944291635 | 0     | 1           | -0,06 | 0,928438649 | -0,08 | 0,845164782 | 0,06  | 0,939196427 |
| Mir20a    | 0,76  | 0,60854678  | 0,61  | 0,769551285 | -0,29 | 0,876867137 | -0,76 | 0,723887166 | 0,4   | 0,864373858 |
| Mir20b    | 0,17  | 0,832798869 | 0,09  | 0,892869412 | -0,17 | 0,838289412 | -0,07 | 0,868828239 | -0,07 | 0,949751787 |
| Mir210    | 0,05  | 0,925195044 | 0     | 1           | -0,23 | 0,712697139 | 0,12  | 0,744192947 | -0,04 | 0,958840977 |
| Mir211    | 0,29  | 0,502600185 | 0,2   | 0,79020104  | -0,04 | 0,955524897 | -0,24 | 0,606597042 | 0,05  | 0,954694921 |
| Mir212    | -0,08 | 0,858869926 | 0,19  | 0,655607331 | -0,24 | 0,689058581 | -0,17 | 0,758772982 | -0,03 | 0,981062401 |
| Mir2136   | -0,03 | 0,966271685 | -0,02 | 0,987282412 | 0,07  | 0,923520317 | -0,07 | 0,920036779 | 0,25  | 0,762421617 |
| Mir2137   | 0,19  | 0,665609782 | -0,05 | 0,950415432 | 0,19  | 0,826241249 | -0,12 | 0,800853287 | 0,1   | 0,900212688 |
| Mir215    | 0,01  | 0,983516046 | 0,19  | 0,70205441  | -0,05 | 0,941627748 | -0,15 | 0,707902199 | -0,01 | 0,991216325 |
| Mir216a   | 0,22  | 0,736503749 | -0,08 | 0,857388191 | -0,18 | 0,815283194 | 0,06  | 0,885913289 | -0,16 | 0,810820885 |
| Mir216b   | 0,01  | 0,982511282 | 0,2   | 0,734929763 | 0,04  | 0,953975807 | -0,06 | 0,924520726 | -0,3  | 0,558605125 |
| Mir217    | -0,03 | 0,960523315 | -0,13 | 0,777999988 | -0,1  | 0,876684089 | 0     | 0,993337409 | 0,02  | 0,981439632 |

|           |       |             |       |             |       |             |       |             |       |             |
|-----------|-------|-------------|-------|-------------|-------|-------------|-------|-------------|-------|-------------|
| Mir218-1  | 0,12  | 0,84241758  | -0,33 | 0,640836969 | -0,44 | 0,543821684 | 0     | 1           | -0,28 | 0,708898543 |
| Mir218-2  | -0,23 | 0,559760851 | 0,31  | 0,693906911 | -0,14 | 0,808747196 | -0,49 | 0,471397735 | -0,69 | 0,375162254 |
| Mir219a-1 | 0,22  | 0,59771006  | 0,04  | 0,936792848 | -0,24 | 0,637321546 | -0,21 | 0,578797782 | 0,13  | 0,837735224 |
| Mir221    | 0,72  | 0,353022744 | -0,03 | 0,994376785 | -0,15 | 0,899093449 | 0     | 1           | -0,81 | 0,45731544  |
| Mir222    | 0,63  | 0,616321459 | -0,52 | 0,747707816 | -1,14 | 0,149216469 | -0,12 | 0,970931237 | -0,08 | 0,98262815  |
| Mir224    | 0,29  | 0,481677041 | 0,07  | 0,892727342 | 0,24  | 0,840187016 | 0,07  | 0,876545851 | 0,04  | 0,962442464 |
| Mir22hg   | 0,55  | 0,298771977 | 0,09  | 0,923224318 | -0,56 | 0,151309352 | 0,39  | 0,406031453 | 0,48  | 0,431894609 |
| Mir23a    | 0,29  | 0,908835118 | -0,62 | 0,756267547 | 0,26  | 0,914320423 | -0,65 | 0,262650364 | -0,73 | 0,321751898 |
| Mir24-2   | -0,12 | 0,864598944 | -0,26 | 0,596930496 | 0,51  | 0,540172074 | -0,05 | 0,958589414 | -0,53 | 0,508153495 |
| Mir25     | -0,12 | 0,892124736 | -0,16 | 0,741891874 | -0,22 | 0,737241227 | 0,2   | 0,71158821  | -0,2  | 0,778656578 |
| Mir26a-1  | -0,07 | 0,921565185 | 0,05  | 0,932292974 | -0,01 | 0,992362085 | -0,67 | 0,146247596 | -0,1  | 0,951429597 |
| Mir26a-2  | 0,38  | 0,376265874 | 0,18  | 0,870958707 | 0,02  | 0,982305856 | -0,18 | 0,626690659 | -0,35 | 0,698115018 |
| Mir26b    | 0,1   | 0,902628825 | 0,33  | 0,824916914 | -0,06 | 0,942549395 | 0,06  | 0,88283334  | 0,23  | 0,746431548 |
| Mir27a    | 0,31  | 0,818587047 | -0,1  | 0,965042946 | 1,39  | 0,383161457 | -0,78 | 0,271252298 | -0,18 | 0,874554354 |
| Mir28a    | 0,44  | 0,697356307 | -0,68 | 0,494161701 | -0,01 | 0,995414392 | 0,63  | 0,380761582 | 0     | 0,999522712 |
| Mir28b    | 0,23  | 0,653766717 | -0,06 | 0,905051067 | 0     | 0,998479656 | 0,19  | 0,627089222 | 0,29  | 0,616797608 |
| Mir28c    | 0,1   | 0,832392436 | -0,18 | 0,808942942 | 0,71  | 0,715497532 | -4    | 0,006430485 | -0,71 | 0,290428148 |
| Mir290a   | 0,18  | 0,758136438 | 0,54  | 0,639698557 | -0,06 | 0,945504473 | -0,09 | 0,835175707 | 0,22  | 0,749218624 |
| Mir296    | 0,11  | 0,921628755 | -0,08 | 0,919873208 | 0,34  | 0,648134387 | 0,16  | 0,810971133 | 0,14  | 0,89204841  |
| Mir297a-4 | -0,16 | 0,84900712  | 0,19  | 0,825162812 | 0,1   | 0,929272323 | -0,16 | 0,687911064 | 0,54  | 0,510169579 |
| Mir297b   | 0,21  | 0,750334502 | 0,21  | 0,703923817 | 0,16  | 0,841563482 | -0,25 | 0,652707055 | -0,13 | 0,916674771 |
| Mir298    | 0,2   | 0,782876517 | 0,3   | 0,729172466 | -0,17 | 0,831720346 | -0,61 | 0,431657795 | -0,28 | 0,763240477 |
| Mir299a   | 0,18  | 0,645559207 | 0,22  | 0,74717977  | -0,37 | 0,440550754 | -0,11 | 0,805289676 | 0,11  | 0,902802615 |
| Mir299b   | 0,04  | 0,93992615  | 0,13  | 0,904092384 | -0,16 | 0,848089506 | -0,04 | 0,9274274   | 0,57  | 0,277185147 |
| Mir29a    | 0     | 0,999536558 | 0,63  | 0,738810128 | -0,33 | 0,501737035 | 0,65  | 0,443395792 | 0,67  | 0,692191358 |
| Mir29b-1  | 0,7   | 0,642618049 | -0,2  | 0,792434694 | 0,33  | 0,787011462 | -0,11 | 0,899335603 | -0,02 | 0,990633766 |
| Mir300    | 0,42  | 0,700019125 | 0,03  | 0,956278122 | 0,24  | 0,864411302 | 0     | 0,994512187 | 0,04  | 0,974110019 |
| Mir301    | 0,05  | 0,923820085 | -0,02 | 0,994380605 | 0,16  | 0,839588297 | 0,31  | 0,345583532 | 0,08  | 0,910186167 |
| Mir301b   | 0,32  | 0,540296693 | 0,14  | 0,794404033 | -0,26 | 0,780077469 | 0,42  | 0,172652422 | 0,31  | 0,646672171 |
| Mir302a   | 0,15  | 0,751534367 | -0,01 | 0,989873399 | 0,06  | 0,934813979 | -0,16 | 0,636309622 | -0,03 | 0,968017942 |
| Mir302b   | 0,09  | 0,866720868 | 0,02  | 0,981214034 | -0,24 | 0,615181078 | -0,14 | 0,709465672 | -0,11 | 0,868150458 |
| Mir302c   | 0,08  | 0,858748956 | -0,11 | 0,807808388 | -0,22 | 0,693486995 | 0,26  | 0,550271886 | 0,09  | 0,904830156 |
| Mir302d   | -0,37 | 0,472993837 | 0,03  | 0,95021587  | -0,14 | 0,775290551 | -0,09 | 0,809119408 | 0,08  | 0,916173996 |
| Mir3057   | 0,91  | 0,529024039 | -0,3  | 0,754578715 | 0,55  | 0,484767681 | 0,15  | 0,851926687 | 0,51  | 0,635102193 |
| Mir3058   | -0,15 | 0,829070578 | 0,17  | 0,809683705 | 0,61  | 0,32492577  | 0,18  | 0,728249817 | 0,21  | 0,774517424 |



|           |       |             |       |             |       |             |       |             |       |             |
|-----------|-------|-------------|-------|-------------|-------|-------------|-------|-------------|-------|-------------|
| Mir3059   | 0,23  | 0,746089929 | 0,01  | 0,987514757 | -0,28 | 0,696594185 | 0,1   | 0,779547737 | 0,12  | 0,868885122 |
| Mir3060   | 0     | 0,998873583 | -0,12 | 0,914962572 | 0,07  | 0,932577939 | 0,52  | 0,262835741 | 0,11  | 0,890957032 |
| Mir3061   | 0,51  | 0,72696312  | 0,39  | 0,879788068 | -0,01 | 0,996260936 | 1,2   | 0,182991717 | 0,27  | 0,911813187 |
| Mir3062   | 0,19  | 0,618567097 | -0,11 | 0,815973308 | 0,07  | 0,922318683 | 0,12  | 0,845813504 | 0,08  | 0,94989088  |
| Mir3065   | 0,39  | 0,434264464 | -0,2  | 0,726652101 | 0,24  | 0,669926849 | -0,05 | 0,903419802 | -0,1  | 0,903153151 |
| Mir3066   | 0,02  | 0,984752479 | 0,63  | 0,748605628 | 0     | 0,998479176 | -0,67 | 0,236315157 | 1,22  | 0,330314966 |
| Mir3067   | 0,09  | 0,839881823 | -0,08 | 0,862430716 | -0,07 | 0,903948251 | 0,13  | 0,759536517 | -0,09 | 0,89529118  |
| Mir3068   | -0,28 | 0,79119595  | -0,21 | 0,810340604 | -0,78 | 0,563934293 | 0,72  | 0,298503592 | -0,36 | 0,666055303 |
| Mir3070a  | -0,2  | 0,703129517 | -0,03 | 0,959685428 | -0,42 | 0,469053827 | 0,03  | 0,956803614 | -0,01 | 0,989016067 |
| Mir3070b  | 0,09  | 0,905414735 | -0,03 | 0,965389843 | -0,21 | 0,77115153  | 0,34  | 0,528059421 | 0,3   | 0,765002083 |
| Mir3073a  | 0,64  | 0,2488289   | 0,1   | 0,862153944 | -0,22 | 0,705811313 | -0,04 | 0,947809027 | -0,03 | 0,97872616  |
| Mir3074-1 | -0,07 | 0,91694318  | -0,49 | 0,678357594 | 0,09  | 0,912299263 | 0,68  | 0,430977925 | 0,16  | 0,91314596  |
| Mir3074-2 | 0,71  | 0,341384943 | 0,6   | 0,667097376 | 0,19  | 0,821033224 | 0,45  | 0,319364019 | -0,06 | 0,947437555 |
| Mir3075   | 0,15  | 0,852363306 | 0,24  | 0,867265251 | 0,03  | 0,985537466 | 0,18  | 0,891790388 | 0,43  | 0,612170528 |
| Mir3076   | 0,59  | 0,60936249  | -0,28 | 0,790939978 | -0,28 | 0,814956693 | -0,54 | 0,441112475 | 0,04  | 0,975441362 |
| Mir3079   | 0,04  | 0,930631819 | 0,03  | 0,961333446 | -0,07 | 0,911221098 | -0,11 | 0,783708375 | -0,01 | 0,98653183  |
| Mir3080   | 0,17  | 0,759783523 | 0,02  | 0,977480225 | -0,14 | 0,8290371   | 0     | 1           | 0,16  | 0,864373858 |
| Mir3081   | -0,22 | 0,669220209 | 0,01  | 0,995205602 | 0,2   | 0,804576742 | -0,75 | 0,143071117 | 0,11  | 0,93417442  |
| Mir3082   | -0,31 | 0,464939452 | -0,13 | 0,83670177  | 0,23  | 0,825782434 | -0,35 | 0,511044878 | 0,32  | 0,697818445 |
| Mir3083   | 0,42  | 0,486772528 | 0,35  | 0,47742142  | -0,42 | 0,452053355 | -0,22 | 0,543832155 | -0,1  | 0,920355527 |
| Mir3085   | 0,21  | 0,598965932 | 0,01  | 0,984962061 | -0,19 | 0,777918093 | 0,05  | 0,908342208 | -0,23 | 0,677222415 |
| Mir3086   | 0,12  | 0,836877571 | 0,1   | 0,84314495  | -0,07 | 0,911506558 | 0     | 1           | 0,14  | 0,823098095 |
| Mir3087   | 0,02  | 0,967270241 | 0,13  | 0,862559271 | 0,1   | 0,932866273 | -0,07 | 0,870922338 | -0,32 | 0,538648465 |
| Mir3088   | 0,72  | 0,36631183  | 0,32  | 0,515401099 | -0,24 | 0,678468552 | -0,71 | 0,108261192 | 0,03  | 0,979294367 |
| Mir3089   | 0,09  | 0,948376096 | 0,04  | 0,981586987 | 0,24  | 0,79653228  | -0,54 | 0,613098505 | 0,34  | 0,844105751 |
| Mir3090   | 0,39  | 0,689253784 | 0,17  | 0,750325684 | -0,07 | 0,950862176 | 0,02  | 0,962332189 | -0,2  | 0,763046493 |
| Mir3091   | -0,04 | 0,95538722  | 0,02  | 0,975765252 | 0,03  | 0,974887915 | 0,26  | 0,455993377 | 0,17  | 0,81431215  |
| Mir3092   | 0,49  | 0,704720946 | -0,18 | 0,820461325 | 0,43  | 0,725191296 | 1     | 0,078988145 | 0,65  | 0,317406361 |
| Mir3093   | 0,53  | 0,204646521 | 0,13  | 0,789363581 | 0,01  | 0,995622408 | 0,26  | 0,460601513 | 0,13  | 0,884104506 |
| Mir3094   | 0,58  | 0,627312744 | 0     | 0,997700959 | 0,18  | 0,853361079 | -0,28 | 0,62296101  | -0,39 | 0,581802025 |
| Mir3095   | 0,02  | 0,969486005 | 0,03  | 0,958545812 | -0,14 | 0,876684089 | -0,05 | 0,920640884 | -0,13 | 0,861506431 |
| Mir3097   | 0,31  | 0,7914678   | -0,56 | 0,878240984 | -0,07 | 0,990836784 | -0,71 | 0,295827464 | 0,52  | 0,613836622 |
| Mir3098   | -0,07 | 0,956452501 | -0,15 | 0,845712013 | -0,79 | 0,384641418 | 0,15  | 0,921584021 | -0,04 | 0,979456872 |
| Mir3099   | 0,01  | 0,98456417  | 0,02  | 0,970020205 | -0,13 | 0,834488055 | -0,12 | 0,747613418 | 0,07  | 0,92519473  |
| Mir30a    | 0,22  | 0,847613888 | -0,16 | 0,932292974 | 0,11  | 0,909963525 | -0,39 | 0,84134133  | -0,07 | 0,979456872 |

|          |       |             |       |             |       |             |       |             |       |             |
|----------|-------|-------------|-------|-------------|-------|-------------|-------|-------------|-------|-------------|
| Mir30b   | -0,48 | 0,546826053 | 0,14  | 0,919602924 | -0,22 | 0,729031049 | -0,86 | 0,76904838  | -0,23 | 0,952296554 |
| Mir30c-1 | -0,37 | 0,495249753 | 0,03  | 0,975019318 | 0,16  | 0,845993227 | 0,17  | 0,854342596 | 0,09  | 0,953971867 |
| Mir30c-2 | 0,13  | 0,889252203 | 0,14  | 0,807100558 | -0,38 | 0,599364835 | -0,51 | 0,512935647 | 0,29  | 0,887936668 |
| Mir30d   | -0,61 | 0,460231397 | -0,16 | 0,852461907 | -1,13 | 0,129737752 | 0     | 1           | 0,28  | 0,840952901 |
| Mir30e   | -0,03 | 0,956194544 | -0,87 | 0,290839749 | 0,38  | 0,635343269 | 1,13  | 0,132918867 | 0,77  | 0,267677873 |
| Mir31    | -0,16 | 0,763867597 | 0,05  | 0,923044405 | 0,27  | 0,821229302 | 0,09  | 0,814971655 | 0,38  | 0,462558109 |
| Mir3102  | -0,08 | 0,911800803 | -0,12 | 0,850001559 | 0,02  | 0,982305856 | -0,02 | 0,970897388 | -0,54 | 0,415425377 |
| Mir3103  | 0,14  | 0,842851909 | -0,26 | 0,738984063 | 0,39  | 0,483168148 | -0,15 | 0,685796239 | 0,02  | 0,982175252 |
| Mir3105  | 0,08  | 0,881781891 | 0,06  | 0,906758475 | -0,17 | 0,769472043 | -0,11 | 0,765874546 | -0,2  | 0,72393858  |
| Mir3106  | 0,16  | 0,815219917 | 0,05  | 0,926157704 | -0,03 | 0,968742139 | -0,05 | 0,921423877 | 0,12  | 0,879072575 |
| Mir3107  | 0,07  | 0,896147432 | -0,07 | 0,887493001 | 0,08  | 0,924910686 | 0,08  | 0,893150543 | -0,13 | 0,893117638 |
| Mir3108  | -0,1  | 0,865776054 | -0,09 | 0,855474571 | 0,34  | 0,547432541 | 0,2   | 0,609023716 | 0,59  | 0,360726287 |
| Mir3109  | 0,4   | 0,79263663  | -0,87 | 0,457889449 | 0,19  | 0,914965671 | 0,26  | 0,791822555 | -0,22 | 0,877316793 |
| Mir3110  | -0,15 | 0,816710776 | 0,03  | 0,951768918 | -0,01 | 0,997220401 | -0,04 | 0,925025576 | 0,07  | 0,939948423 |
| Mir32    | 0,02  | 0,979130815 | -0,25 | 0,677981098 | -0,11 | 0,870590513 | 0,03  | 0,963752888 | -0,08 | 0,916516313 |
| Mir323   | -0,07 | 0,877096932 | -0,02 | 0,969019461 | -0,18 | 0,757498725 | -0,08 | 0,825908912 | -0,12 | 0,853041033 |
| Mir325   | 0,15  | 0,758136438 | 0,04  | 0,937396327 | -0,15 | 0,823823322 | -0,15 | 0,870877018 | 0,12  | 0,915356549 |
| Mir326   | -0,06 | 0,898116888 | -0,21 | 0,654719935 | -0,02 | 0,987208663 | 0,06  | 0,87613802  | 0,22  | 0,662029815 |
| Mir327   | -0,04 | 0,949362206 | 0,13  | 0,824372931 | -0,32 | 0,61190379  | -0,02 | 0,962670023 | 0,07  | 0,926308401 |
| Mir328   | 0,22  | 0,618093813 | -0,09 | 0,847821325 | -0,38 | 0,527184883 | 0     | 1           | -0,01 | 0,995109577 |
| Mir329   | 1,51  | 0,277154156 | 0,12  | 0,816617486 | -0,38 | 0,501867979 | -0,07 | 0,896599656 | 0,83  | 0,395070127 |
| Mir33    | 0,51  | 0,543570731 | 0,7   | 0,688450928 | -0,4  | 0,392816132 | -0,37 | 0,284243483 | -0,03 | 0,971058066 |
| Mir330   | 0,26  | 0,642385552 | -0,1  | 0,832117565 | -0,04 | 0,950846671 | 0,14  | 0,74417234  | 0,1   | 0,916173996 |
| Mir331   | -0,04 | 0,959406953 | 0     | 1           | -0,17 | 0,804533435 | 0,06  | 0,877053477 | -0,21 | 0,748710615 |
| Mir335   | -0,45 | 0,447068257 | -0,14 | 0,902024581 | -0,14 | 0,898935616 | -0,07 | 0,960701018 | 0,37  | 0,82122041  |
| Mir337   | 0,11  | 0,79498488  | -0,52 | 0,609632892 | -0,03 | 0,972847253 | 0,02  | 0,968311421 | -0,34 | 0,679932345 |
| Mir338   | 0,18  | 0,682923931 | 0,01  | 0,983071427 | -0,05 | 0,944441051 | -0,31 | 0,599774385 | 0,06  | 0,951646452 |
| Mir340   | 1,61  | 0,384432433 | 0,54  | 0,707524747 | 0,3   | 0,828127077 | -1,52 | 0,185628374 | -0,19 | 0,89630096  |
| Mir341   | 0,38  | 0,545635346 | -0,18 | 0,716725804 | -0,23 | 0,70398922  | -0,15 | 0,709580416 | -0,06 | 0,934185668 |
| Mir342   | 0,51  | 0,68194299  | -1,62 | 0,49125334  | -1,13 | 0,545465016 | 1,81  | 0,132238421 | 0,71  | 0,673577848 |
| Mir343   | -0,02 | 0,990294963 | 0,24  | 0,75380926  | 1,26  | 0,017829799 | -0,6  | 0,460307888 | -0,51 | 0,600537288 |
| Mir344   | 0,08  | 0,890122859 | -0,09 | 0,868462743 | 0,18  | 0,727131283 | -0,04 | 0,932364636 | 0,15  | 0,812229801 |
| Mir344-2 | 0,01  | 0,991919022 | -0,02 | 0,969314504 | -0,11 | 0,864801207 | 0,08  | 0,822470491 | -0,02 | 0,981913783 |
| Mir344b  | -0,03 | 0,953324702 | -0,1  | 0,831404974 | -0,19 | 0,739326568 | 0,01  | 0,993159171 | -0,07 | 0,942854766 |
| Mir344c  | 0,3   | 0,642618049 | 0,09  | 0,864989815 | -0,2  | 0,667634901 | -0,04 | 0,922740736 | 0,18  | 0,77382007  |

|           |       |             |       |             |       |             |       |             |       |             |
|-----------|-------|-------------|-------|-------------|-------|-------------|-------|-------------|-------|-------------|
| Mir344d-1 | -0,1  | 0,822107047 | -0,04 | 0,935984823 | 0,15  | 0,806102885 | -0,07 | 0,864951671 | -0,1  | 0,879072575 |
| Mir344d-2 | 0,37  | 0,412575527 | -0,14 | 0,828219939 | 0,19  | 0,806044178 | 0,02  | 0,971149993 | -0,05 | 0,949244147 |
| Mir344d-3 | 0,12  | 0,832696131 | -0,17 | 0,747707816 | -0,22 | 0,796418663 | 0,09  | 0,876247018 | 0,08  | 0,934344891 |
| Mir344e   | -0,02 | 0,970232527 | -0,26 | 0,726652101 | -0,14 | 0,860094776 | 0,18  | 0,721603753 | 0,29  | 0,628127128 |
| Mir344f   | -0,03 | 0,971922167 | 0,08  | 0,86297915  | 0,19  | 0,79007666  | 0     | 1           | -0,17 | 0,829280005 |
| Mir344i   | 0,26  | 0,548010372 | -0,03 | 0,966078321 | -0,2  | 0,70055782  | 0     | 1           | -0,24 | 0,708592278 |
| Mir345    | 0,45  | 0,282070177 | 0,09  | 0,845112339 | 0,08  | 0,918870142 | -0,02 | 0,966401528 | 0,01  | 0,989016067 |
| Mir346    | 0,22  | 0,579921748 | -0,17 | 0,818072947 | 0,19  | 0,779859477 | 0,01  | 0,989926105 | -0,2  | 0,791800359 |
| Mir3471-1 | 0,09  | 0,870145675 | -0,03 | 0,947152603 | 0,32  | 0,660517013 | 0,05  | 0,905304704 | 0,11  | 0,868037689 |
| Mir3473a  | 0,08  | 0,933912196 | -0,01 | 0,994137877 | -0,18 | 0,740505784 | -0,08 | 0,883059585 | 0,19  | 0,758052028 |
| Mir3473b  | -0,16 | 0,81313264  | 0,49  | 0,667502888 | 0,03  | 0,963715469 | -0,35 | 0,550371604 | 1,55  | 0,05100134  |
| Mir3473c  | 0,09  | 0,909885273 | 0,25  | 0,831404974 | -0,17 | 0,821229302 | -0,17 | 0,813465331 | 0,48  | 0,424156608 |
| Mir3473d  | 0,22  | 0,598582945 | 0,21  | 0,693906911 | -0,1  | 0,909371204 | 0,03  | 0,965653854 | 0,09  | 0,912972969 |
| Mir3474   | 0,16  | 0,785669218 | -0,05 | 0,917623085 | 0,12  | 0,882426352 | -0,42 | 0,371013487 | -0,48 | 0,321326363 |
| Mir3475   | 0,05  | 0,948376096 | -0,12 | 0,811472247 | 0,14  | 0,873329692 | 0,16  | 0,690664654 | 0,16  | 0,823098095 |
| Mir34a    | -0,37 | 0,553920143 | 0     | 1           | 0,14  | 0,838280035 | -0,2  | 0,671576377 | -0,14 | 0,842274128 |
| Mir34b    | 0,23  | 0,775132839 | -0,12 | 0,883145635 | -0,31 | 0,716019776 | 0,05  | 0,893958719 | -0,54 | 0,264427674 |
| Mir34c    | -0,19 | 0,736327236 | 0,05  | 0,925569254 | -0,02 | 0,987245628 | -0,22 | 0,572023693 | -0,16 | 0,823098095 |
| Mir350    | -0,15 | 0,757032046 | 0,26  | 0,887005798 | -0,59 | 0,584320897 | 0,32  | 0,487256882 | -0,13 | 0,832781095 |
| Mir3547   | 0,25  | 0,798244283 | -0,04 | 0,988954136 | 0,29  | 0,816081776 | 0,05  | 0,970295742 | 0,06  | 0,956610289 |
| Mir3572   | -0,16 | 0,758721455 | -0,2  | 0,726302218 | -0,14 | 0,86182019  | 0,22  | 0,600840825 | 0,2   | 0,745463091 |
| Mir361    | 0,38  | 0,867243066 | -2,93 | 0,010916421 | 1,02  | 0,633535699 | 2,71  | 0,009182057 | 0,22  | 0,904931004 |
| Mir362    | -0,11 | 0,939317944 | -0,23 | 0,860629851 | 0,18  | 0,725191296 | -0,03 | 0,977176942 | -0,19 | 0,790215612 |
| Mir363    | -0,05 | 0,914090929 | 0,16  | 0,802979985 | 0     | 0,998479656 | 0,02  | 0,969879307 | 0,03  | 0,975004375 |
| Mir365-1  | 0,38  | 0,630905267 | -0,02 | 0,984121306 | -0,7  | 0,11637989  | -0,25 | 0,588576174 | 0,01  | 0,991418175 |
| Mir365-2  | 0,78  | 0,55640978  | 0,36  | 0,857408462 | 0,34  | 0,888677583 | -0,12 | 0,919835104 | -0,53 | 0,662790079 |
| Mir367    | 0,01  | 0,981412917 | -0,02 | 0,965389843 | -0,02 | 0,984407511 | -0,04 | 0,932800758 | 0,12  | 0,852880773 |
| Mir369    | 0,13  | 0,814444163 | 0,18  | 0,792086001 | -0,15 | 0,772397144 | 0,04  | 0,936218995 | 0,04  | 0,977298362 |
| Mir370    | 0,06  | 0,910559408 | 0,18  | 0,82898187  | -0,15 | 0,807727786 | -0,12 | 0,795439286 | 0,01  | 0,991628025 |
| Mir374b   | 0,16  | 0,698332739 | 0,02  | 0,968460622 | -0,11 | 0,860094776 | -0,05 | 0,902841605 | -0,17 | 0,818041383 |
| Mir374c   | -0,04 | 0,94916801  | 0     | 1           | 0,05  | 0,937709166 | -0,04 | 0,95354796  | -0,21 | 0,791631916 |
| Mir375    | -0,05 | 0,923749064 | -0,09 | 0,883145635 | -0,08 | 0,891510964 | 0,38  | 0,586102851 | 0,02  | 0,982859799 |
| Mir376a   | 0,38  | 0,687662951 | -0,05 | 0,935329426 | -0,06 | 0,925195648 | -0,07 | 0,858837184 | -0,09 | 0,895402606 |
| Mir376b   | 0,9   | 0,626036023 | 0,02  | 0,96536531  | -0,2  | 0,715497532 | -0,01 | 0,978782666 | 0,07  | 0,927908317 |
| Mir376c   | 0,32  | 0,677288845 | 0,03  | 0,964875723 | 0,06  | 0,916403684 | -0,02 | 0,970931237 | 0,03  | 0,97425848  |

|          |       |             |       |             |       |             |       |             |       |             |
|----------|-------|-------------|-------|-------------|-------|-------------|-------|-------------|-------|-------------|
| Mir377   | 0,13  | 0,817242253 | 0,05  | 0,937377463 | 0,01  | 0,993379272 | 0,02  | 0,968211182 | 0,01  | 0,990935486 |
| Mir378a  | 0,09  | 0,843783045 | -0,09 | 0,852719676 | -0,01 | 0,991068765 | 0,16  | 0,617812472 | 0,06  | 0,936333982 |
| Mir378b  | 0,32  | 0,446685156 | 0,09  | 0,859585789 | -0,24 | 0,661089127 | 0,08  | 0,831764227 | 0,04  | 0,95985938  |
| Mir378d  | 0,52  | 0,327334452 | 0,1   | 0,916496897 | 0     | 0,997268369 | -0,6  | 0,122654887 | 0,13  | 0,85155002  |
| Mir379   | 0,05  | 0,91881793  | 0,22  | 0,629381119 | -0,1  | 0,873026373 | -0,21 | 0,644545456 | -0,09 | 0,91824793  |
| Mir380   | 0,21  | 0,670656388 | -0,01 | 0,9860901   | -0,2  | 0,717349003 | -0,11 | 0,875473756 | 0,06  | 0,957298635 |
| Mir381   | -0,04 | 0,941131022 | -0,09 | 0,866248527 | -0,05 | 0,953282634 | 0,14  | 0,671305667 | 0,28  | 0,699060093 |
| Mir382   | 0,26  | 0,791959729 | 0,05  | 0,913619068 | -0,18 | 0,786634846 | -0,1  | 0,818849811 | -0,21 | 0,74624632  |
| Mir383   | 0,14  | 0,749319051 | 0,04  | 0,965389843 | -0,17 | 0,849697489 | 0,02  | 0,975687196 | 0,16  | 0,820429603 |
| Mir384   | 0,08  | 0,887029777 | 0,04  | 0,94892312  | -0,08 | 0,887000007 | -0,03 | 0,939585045 | 0     | 0,997254437 |
| Mir3961  | 0,27  | 0,541139964 | 0,01  | 0,994390365 | -0,53 | 0,433951237 | -0,02 | 0,965524724 | -0,08 | 0,938825649 |
| Mir3962  | -0,52 | 0,811376629 | -0,11 | 0,958758124 | -0,37 | 0,861307315 | 0,6   | 0,873901698 | -0,74 | 0,854551549 |
| Mir3963  | 0,03  | 0,959985598 | -0,17 | 0,787503301 | -0,04 | 0,961293403 | 0,23  | 0,550164397 | 0,14  | 0,847312006 |
| Mir3964  | -0,1  | 0,824728873 | 0,13  | 0,790958831 | -0,03 | 0,968742139 | 0     | 1           | 0,08  | 0,90569569  |
| Mir3965  | 0,2   | 0,673291416 | -0,1  | 0,828818891 | -0,03 | 0,964654526 | -0,05 | 0,908141892 | -0,04 | 0,975441362 |
| Mir3966  | -0,17 | 0,68809368  | -0,08 | 0,859954464 | 0,12  | 0,820245247 | 0,37  | 0,468566806 | 0,14  | 0,880318471 |
| Mir3967  | -0,05 | 0,921306075 | -0,1  | 0,861905894 | -0,05 | 0,944468902 | -0,03 | 0,961123444 | 0,01  | 0,990633766 |
| Mir3968  | 0,21  | 0,677395683 | 0,11  | 0,804025406 | -0,09 | 0,911634383 | -0,08 | 0,831385555 | 0,17  | 0,791694696 |
| Mir3969  | -0,08 | 0,860073468 | 0     | 1           | -0,05 | 0,946201063 | -0,05 | 0,909934077 | -0,04 | 0,956610289 |
| Mir3970  | 0,08  | 0,897717279 | -0,05 | 0,918694468 | 0,03  | 0,966359868 | 0,05  | 0,91214271  | -0,06 | 0,952971656 |
| Mir409   | 0,13  | 0,867025523 | 0,04  | 0,941609372 | -0,2  | 0,719386001 | 0,06  | 0,874607411 | 0,12  | 0,864943787 |
| Mir411   | 0,05  | 0,922591969 | 0     | 0,997700959 | 0,05  | 0,946201063 | 0     | 1           | 0,08  | 0,917347603 |
| Mir412   | 0     | 0,996998625 | 0,03  | 0,974826242 | -0,06 | 0,942274338 | 0,36  | 0,511135163 | -0,21 | 0,776025316 |
| Mir421   | 0,08  | 0,862322913 | 0,07  | 0,887889466 | -0,16 | 0,804821595 | -0,54 | 0,513116548 | -0,31 | 0,733884819 |
| Mir423   | -0,1  | 0,882060783 | -0,04 | 0,979551751 | 0,14  | 0,811424918 | 0,08  | 0,959921588 | -0,53 | 0,664273475 |
| Mir425   | -0,09 | 0,890974575 | 0,08  | 0,862443027 | -0,01 | 0,990836784 | -0,24 | 0,779616632 | 0,01  | 0,991980521 |
| Mir431   | 0,13  | 0,803492493 | -0,06 | 0,89081665  | 0,24  | 0,647928093 | 0,05  | 0,895836916 | 0,04  | 0,960974478 |
| Mir432   | -0,1  | 0,856984761 | 0,15  | 0,793842674 | -0,06 | 0,934813979 | -0,35 | 0,688341079 | -0,21 | 0,855741842 |
| Mir434   | 0,04  | 0,950669622 | 0,13  | 0,894676428 | -0,04 | 0,953951069 | 0     | 1           | 0,11  | 0,856323731 |
| Mir448   | -0,17 | 0,806491264 | -0,07 | 0,886728509 | -0,13 | 0,838289412 | -0,06 | 0,899003207 | -0,17 | 0,765327693 |
| Mir449a  | -0,25 | 0,62352322  | -0,08 | 0,87892334  | -0,22 | 0,770526999 | 0,1   | 0,796871208 | 0,28  | 0,622417489 |
| Mir449b  | -0,06 | 0,899663802 | 0,03  | 0,955242777 | -0,04 | 0,967767582 | -0,3  | 0,323734403 | -0,08 | 0,917075631 |
| Mir449c  | 0     | 0,998027251 | -0,19 | 0,725431195 | -0,04 | 0,959510036 | 0,1   | 0,862828669 | 0,14  | 0,862867603 |
| Mir450-1 | 0,09  | 0,845729597 | -0,23 | 0,571667144 | -0,1  | 0,908400411 | -0,13 | 0,873610553 | 0,19  | 0,762421617 |
| Mir450-2 | 0,11  | 0,867953985 | -0,26 | 0,667422905 | -1,06 | 0,064338945 | -0,15 | 0,893185948 | -0,14 | 0,920748161 |

|           |       |             |       |             |       |             |       |             |       |             |
|-----------|-------|-------------|-------|-------------|-------|-------------|-------|-------------|-------|-------------|
| Mir450b   | 0,02  | 0,976574175 | -0,02 | 0,974702154 | 0,06  | 0,923350407 | -0,16 | 0,787876152 | -0,05 | 0,953971867 |
| Mir451a   | 0,29  | 0,461113298 | -0,07 | 0,887005798 | 0,02  | 0,987208663 | 0,09  | 0,806596364 | -0,2  | 0,728578071 |
| Mir452    | -0,03 | 0,960737494 | 0     | 1           | 0,18  | 0,828381932 | -0,08 | 0,858956727 | 0,03  | 0,967036726 |
| Mir453    | 0,52  | 0,259885851 | 0,13  | 0,900801202 | -0,47 | 0,540782039 | 0,02  | 0,985865561 | 0,15  | 0,902638028 |
| Mir455    | 0,06  | 0,92234217  | 0,05  | 0,938711163 | -0,1  | 0,882022653 | 0,12  | 0,776421384 | 0,29  | 0,633526525 |
| Mir463    | 0,09  | 0,829299665 | 0,1   | 0,824372931 | -0,12 | 0,882595564 | -0,17 | 0,669653978 | 0,16  | 0,840952901 |
| Mir465    | 0     | 0,997888714 | -0,07 | 0,912379377 | 0,08  | 0,907130828 | -0,05 | 0,931624956 | 0,06  | 0,939448119 |
| Mir466b-2 | 0,12  | 0,859044359 | 0,02  | 0,985598908 | 0,06  | 0,94178334  | 0,05  | 0,937079845 | 0,01  | 0,991480325 |
| Mir466b-3 | 0,3   | 0,547111172 | 0,06  | 0,917695989 | -0,25 | 0,715497532 | 0,06  | 0,892186579 | 0,21  | 0,800540569 |
| Mir466d   | 0,15  | 0,725905817 | -0,01 | 0,996588396 | -0,09 | 0,946528842 | 0,28  | 0,695232035 | -0,17 | 0,890833196 |
| Mir466g   | 0,13  | 0,795286609 | 0,38  | 0,576723643 | -0,58 | 0,436827113 | 0,03  | 0,949239972 | 0,35  | 0,518216192 |
| Mir466h   | 0,08  | 0,917492921 | 0,69  | 0,397888112 | -0,16 | 0,856046789 | -0,28 | 0,511016709 | 0,12  | 0,900126162 |
| Mir466i   | 0,07  | 0,891309235 | -0,06 | 0,896003756 | 0,05  | 0,937346852 | -0,07 | 0,860201004 | 0,25  | 0,760042789 |
| Mir466n   | 0,03  | 0,958512892 | 0,2   | 0,6817338   | -0,38 | 0,389647325 | -0,72 | 0,680245242 | -0,76 | 0,705549506 |
| Mir466o   | -0,14 | 0,764288636 | -0,1  | 0,886518366 | 0,1   | 0,867109522 | 0,09  | 0,815322417 | 0,07  | 0,919394046 |
| Mir466p   | -0,18 | 0,698332739 | -0,04 | 0,932628106 | -0,1  | 0,882540073 | 0,06  | 0,943143586 | 0,73  | 0,177107797 |
| Mir467c   | 0,15  | 0,724502628 | 0,09  | 0,91206541  | -0,03 | 0,976092199 | -0,11 | 0,823045201 | 0,19  | 0,80484971  |
| Mir467d   | 0,22  | 0,665460488 | -0,09 | 0,859295689 | -0,3  | 0,548288344 | -0,08 | 0,828955037 | -0,32 | 0,582641392 |
| Mir467e   | 0,32  | 0,493929    | -0,12 | 0,855632384 | -0,3  | 0,598179126 | 0,09  | 0,867953377 | -0,29 | 0,750764819 |
| Mir467f   | -0,1  | 0,864400092 | -0,52 | 0,446315327 | -0,05 | 0,949334141 | 0,28  | 0,535828309 | 0,04  | 0,969681536 |
| Mir468    | -0,1  | 0,806491264 | -0,04 | 0,938233008 | 0,01  | 0,994076654 | 0,02  | 0,95852873  | 0,07  | 0,929312654 |
| Mir470    | 0,18  | 0,762798673 | 0,08  | 0,855923109 | 0,01  | 0,99394877  | -0,01 | 0,99361557  | 0,06  | 0,948356387 |
| Mir471    | 0,12  | 0,79498488  | -0,02 | 0,975765252 | 0,05  | 0,934813979 | -0,03 | 0,946615246 | 0,04  | 0,960593366 |
| Mir483    | 0,37  | 0,343457563 | -0,03 | 0,9566353   | -0,16 | 0,805783058 | 0,13  | 0,866712375 | 0,05  | 0,968017997 |
| Mir486    | 0,35  | 0,496941449 | 0,3   | 0,572250784 | -0,17 | 0,779859477 | 0,15  | 0,805289676 | 0,63  | 0,307816931 |
| Mir487b   | 0,18  | 0,711274014 | 0,25  | 0,680709276 | 0,49  | 0,828129261 | -0,11 | 0,761101558 | -0,17 | 0,776251218 |
| Mir488    | 0,19  | 0,713874683 | 0     | 1           | -0,24 | 0,663792239 | -0,1  | 0,883116845 | -0,13 | 0,886518325 |
| Mir489    | -0,21 | 0,669214167 | 0     | 1           | 0,04  | 0,955347757 | 0     | 1           | 0,06  | 0,937558003 |
| Mir490    | -0,02 | 0,965350029 | 0,02  | 0,976406273 | -0,18 | 0,804821595 | -0,01 | 0,981332523 | -0,07 | 0,932268703 |
| Mir491    | 0,1   | 0,833900133 | -0,01 | 0,994802028 | -0,12 | 0,832703036 | -0,01 | 0,986412644 | -0,07 | 0,939127163 |
| Mir493    | 0,04  | 0,936871609 | 0,05  | 0,926210163 | 0,8   | 0,689058581 | -0,85 | 0,661579252 | -0,62 | 0,817326467 |
| Mir494    | 0,15  | 0,848224885 | -0,02 | 0,985764487 | -0,25 | 0,672766751 | 0,14  | 0,706619788 | -0,03 | 0,979152939 |
| Mir495    | -0,05 | 0,917014629 | 0,24  | 0,716668427 | 0,19  | 0,71593256  | 0     | 1           | 0,14  | 0,838957343 |
| Mir496a   | 0,22  | 0,699044216 | -0,07 | 0,892916262 | 0,31  | 0,610559205 | 0     | 1           | -0,17 | 0,792404969 |
| Mir497    | 0,02  | 0,984124693 | 0,16  | 0,768632188 | -0,11 | 0,849342965 | -0,38 | 0,351428925 | -0,27 | 0,753779416 |

|          |       |             |       |             |       |             |       |             |       |             |
|----------|-------|-------------|-------|-------------|-------|-------------|-------|-------------|-------|-------------|
| Mir499   | 0,12  | 0,840909921 | 0,24  | 0,711176844 | -0,16 | 0,786933951 | -0,31 | 0,635828571 | -0,2  | 0,831446445 |
| Mir500   | -0,06 | 0,948926586 | 0,01  | 0,9951682   | 0,17  | 0,737241227 | 0     | 0,993869623 | 0,02  | 0,983980708 |
| Mir501   | 0,09  | 0,939274898 | -0,42 | 0,356307531 | 0,4   | 0,804910036 | -0,01 | 1           | -0,48 | 0,858526809 |
| Mir504   | 0,15  | 0,757499328 | 0,04  | 0,945143056 | -0,11 | 0,838800785 | 0,07  | 0,864885179 | 0,22  | 0,700875396 |
| Mir505   | -0,17 | 0,905980832 | 0,07  | 0,994802028 | -1,54 | 0,509702247 | -0,42 | 0,893846627 | 0,66  | 0,750504485 |
| Mir509   | 0,04  | 0,927524861 | 0,21  | 0,694017753 | -0,03 | 0,965571357 | 0     | 1           | 0,07  | 0,921720089 |
| Mir5098  | -0,12 | 0,963378584 | -0,17 | 0,949168867 | -0,63 | 0,751090942 | 0,83  | 0,393691515 | 0,53  | 0,698635781 |
| Mir5099  | -0,06 | 0,910311858 | 0,09  | 0,839789639 | -0,2  | 0,772397144 | 0,2   | 0,628027498 | 0,01  | 0,990202085 |
| Mir5100  | 0,24  | 0,810101389 | 0,17  | 0,791529755 | -0,08 | 0,943788892 | -0,08 | 0,830978499 | -0,12 | 0,877669996 |
| Mir5101  | -0,3  | 0,693001144 | 0,07  | 0,958026545 | -0,61 | 0,36356264  | 0,02  | 0,988205241 | 0,42  | 0,827532593 |
| Mir5103  | 1,1   | 0,268112899 | -0,19 | 0,935041212 | -0,08 | 0,957041977 | -0,08 | 0,9704566   | -0,52 | 0,714226069 |
| Mir5104  | 0,21  | 0,738714467 | -0,65 | 0,768690422 | 0,17  | 0,773365699 | -0,05 | 0,981706816 | -0,32 | 0,859574134 |
| Mir5106  | 0,06  | 0,898269435 | -0,05 | 0,928250778 | -0,33 | 0,513446928 | 0     | 1           | -0,04 | 0,967807075 |
| Mir5108  | 0,3   | 0,479051107 | 0,05  | 0,917821097 | -0,44 | 0,509702247 | -0,01 | 0,987192038 | 0,02  | 0,981677577 |
| Mir511   | 0,32  | 0,620468351 | 0,06  | 0,946885634 | -0,35 | 0,513307287 | 0,11  | 0,878417314 | 0,45  | 0,587199571 |
| Mir5110  | 0,1   | 0,839273617 | 0     | 0,996336736 | -0,29 | 0,582116339 | 0,01  | 0,991948128 | -0,13 | 0,831834722 |
| Mir5112  | 0,36  | 0,586458491 | 0,04  | 0,945143056 | -0,22 | 0,8096564   | -0,77 | 0,086092124 | -0,22 | 0,74933755  |
| Mir5118  | 0,12  | 0,822613889 | -0,14 | 0,89081665  | -0,32 | 0,555308611 | 0,03  | 0,947809027 | -0,38 | 0,590396118 |
| Mir5119  | 0,25  | 0,782889069 | 0,14  | 0,916496897 | -1,22 | 0,302861841 | -0,5  | 0,54169076  | -0,48 | 0,661829904 |
| Mir5120  | 0,87  | 0,154509914 | 0,77  | 0,16121328  | -0,68 | 0,278260113 | 0,25  | 0,691718699 | 1,01  | 0,095922093 |
| Mir5121  | -0,55 | 0,567790521 | -0,07 | 0,961370411 | -0,08 | 0,967767582 | -0,56 | 0,363397218 | 0,22  | 0,901174282 |
| Mir5123  | -0,68 | 0,840909921 | 0,21  | 0,882931058 | 2,61  | 0,194748155 | -0,81 | 0,718358543 | -1,1  | 0,616797608 |
| Mir5124a | -1,27 | 0,481677041 | 1,55  | 0,40873647  | -1,05 | 0,72902724  | -0,53 | 0,857522633 | 1,11  | 0,731927583 |
| Mir5125  | 0,29  | 0,766541178 | 0,18  | 0,869495185 | 0,02  | 0,990836784 | 0,38  | 0,680255321 | 0,46  | 0,628728585 |
| Mir5127  | 0,05  | 0,937251448 | 0,01  | 0,989544005 | -0,36 | 0,675674731 | 0,03  | 0,963752888 | 0,11  | 0,884321797 |
| Mir5128  | -0,15 | 0,841134954 | 0,42  | 0,441733752 | -0,74 | 0,60061447  | -0,17 | 0,825332212 | 0,66  | 0,415999797 |
| Mir5134  | 0,28  | 0,642618049 | -0,01 | 0,997711184 | -0,25 | 0,8271738   | 0,2   | 0,74136915  | -0,37 | 0,654121765 |
| Mir5135  | 0     | 0,996925522 | 0,06  | 0,911258707 | -0,02 | 0,98202621  | 0,26  | 0,635651049 | -0,18 | 0,819072786 |
| Mir532   | -0,01 | 0,989471621 | -0,54 | 0,577638608 | -0,48 | 0,628048897 | 0,62  | 0,419446232 | -0,02 | 0,984125319 |
| Mir539   | 0,12  | 0,790282811 | -0,11 | 0,873628464 | -0,15 | 0,846495171 | -0,03 | 0,953471099 | -0,01 | 0,994774512 |
| Mir540   | 0,02  | 0,964358894 | -0,14 | 0,786190103 | 0,21  | 0,777810365 | 0,51  | 0,171856639 | -0,03 | 0,975441362 |
| Mir541   | 0,13  | 0,803557792 | 0,08  | 0,882589938 | 0     | 0,997268369 | 0     | 0,996714438 | 0,08  | 0,929127539 |
| Mir542   | -0,03 | 0,955836484 | -0,2  | 0,716661568 | -0,43 | 0,441767468 | 0     | 1           | 0,21  | 0,823098095 |
| Mir543   | 0,03  | 0,964358894 | 0,04  | 0,9381453   | -0,11 | 0,861997229 | 0,06  | 0,916123029 | 0,04  | 0,97206128  |
| Mir544   | 0,12  | 0,798561927 | -0,13 | 0,788173011 | -0,37 | 0,366384165 | 0     | 1           | -0,2  | 0,764656525 |

|           |       |             |       |             |       |             |       |             |       |             |
|-----------|-------|-------------|-------|-------------|-------|-------------|-------|-------------|-------|-------------|
| Mir547    | 0,05  | 0,912935521 | 0,03  | 0,956935029 | -0,09 | 0,880574524 | -0,01 | 0,978803096 | -0,03 | 0,97757951  |
| Mir551b   | 0     | 0,997888714 | 0,06  | 0,924916733 | 0,01  | 0,991240121 | 0,22  | 0,532598472 | 0,15  | 0,807725933 |
| Mir568    | -0,29 | 0,5409797   | -0,22 | 0,736934996 | 0,27  | 0,73501607  | -0,13 | 0,857884225 | 0,14  | 0,889620489 |
| Mir574    | 0,02  | 0,978501161 | 0,07  | 0,940161762 | -0,27 | 0,632167655 | 0,03  | 0,979516321 | 0,03  | 0,980945466 |
| Mir582    | 0,42  | 0,816465857 | -0,9  | 0,302028989 | 0,13  | 0,866683512 | 1,35  | 0,031845614 | -0,07 | 0,931519966 |
| Mir592    | -0,11 | 0,859600103 | 0,07  | 0,883093763 | 0,07  | 0,925406374 | -0,12 | 0,752708491 | -0,11 | 0,872431573 |
| Mir598    | 0,09  | 0,846447446 | 0,3   | 0,56164513  | -0,33 | 0,534943813 | 0,41  | 0,48505774  | 0,43  | 0,608957273 |
| Mir599    | 0,18  | 0,68194299  | 0,1   | 0,814499098 | -0,17 | 0,777417583 | -0,02 | 0,968266606 | 0,13  | 0,859663155 |
| Mir615    | 0,07  | 0,908272477 | 0,13  | 0,831404974 | -0,19 | 0,73501607  | 0,02  | 0,957427513 | -0,03 | 0,97425848  |
| Mir6516   | -0,14 | 0,921565185 | -0,81 | 0,383872218 | 1,02  | 0,402220741 | 0,91  | 0,13561302  | 0,56  | 0,258378279 |
| Mir652    | 0,12  | 0,803761785 | 0,04  | 0,937460493 | -0,13 | 0,856218874 | 0,05  | 0,922275195 | 0,24  | 0,745574572 |
| Mir653    | -0,01 | 0,991919022 | -0,1  | 0,840277028 | -0,01 | 0,990699622 | 0,03  | 0,960916827 | -0,11 | 0,886573193 |
| Mir654    | 0,13  | 0,892363276 | -0,01 | 0,989825179 | -0,27 | 0,587014825 | 0     | 1           | -0,19 | 0,749100093 |
| Mir665    | 0,55  | 0,357506461 | 0,15  | 0,851830452 | -0,62 | 0,354649443 | -0,25 | 0,818849811 | 0,01  | 0,994774512 |
| Mir666    | -0,23 | 0,565843439 | -0,02 | 0,979002922 | -0,02 | 0,980801972 | -0,01 | 0,987247308 | 0,17  | 0,825518917 |
| Mir667    | 0,21  | 0,652819827 | 0,03  | 0,948409105 | -0,1  | 0,902086463 | 0,24  | 0,465045754 | 0,14  | 0,890957032 |
| Mir668    | 0,02  | 0,976574175 | -0,04 | 0,935329426 | 0,03  | 0,978012085 | 0,2   | 0,635869722 | -0,13 | 0,865866242 |
| Mir669a-1 | -0,37 | 0,491617162 | 0,72  | 0,500563679 | 0,18  | 0,791940256 | -0,2  | 0,610149813 | 0,11  | 0,876927228 |
| Mir669a-3 | -0,1  | 0,826848357 | -0,07 | 0,972336944 | 0,23  | 0,751090942 | 0,13  | 0,730493593 | 0,17  | 0,82840392  |
| Mir669b   | -0,02 | 0,981357422 | 0,52  | 0,573232957 | 0,3   | 0,543542033 | -0,67 | 0,263246878 | -0,22 | 0,712967777 |
| Mir669c   | -0,5  | 0,380331601 | 0,38  | 0,702324895 | -0,28 | 0,584415531 | 0,02  | 0,980890499 | 0,26  | 0,68987325  |
| Mir669e   | 0,27  | 0,652260778 | 0,17  | 0,711237219 | -0,06 | 0,933080127 | -0,03 | 0,944935757 | 0,11  | 0,869245891 |
| Mir669g   | 0,17  | 0,764288636 | 0,03  | 0,956504634 | -0,04 | 0,963199274 | -0,03 | 0,971100918 | 0,17  | 0,830813323 |
| Mir669h   | 0,05  | 0,94727537  | 0,24  | 0,633533351 | 0,02  | 0,980937731 | 0     | 1           | 0,11  | 0,929780699 |
| Mir669i   | 0     | 0,998449912 | 0,12  | 0,790939978 | -0,03 | 0,966297296 | -0,11 | 0,779547737 | 0,23  | 0,673945231 |
| Mir669j   | 0,17  | 0,735860437 | -0,53 | 0,580257061 | -0,13 | 0,89004987  | 0,29  | 0,54169076  | 0,24  | 0,642726581 |
| Mir669k   | 0,15  | 0,721484809 | 0,03  | 0,949201983 | 0,15  | 0,846795397 | -0,07 | 0,871321071 | 0,2   | 0,793952361 |
| Mir669m-1 | 0,48  | 0,422033372 | -0,12 | 0,91994802  | -0,16 | 0,850910007 | 0,22  | 0,712887618 | 0,27  | 0,746455177 |
| Mir669m-2 | 0,07  | 0,895870455 | -0,55 | 0,611052267 | 0,29  | 0,541560473 | 0,37  | 0,397950785 | 0,08  | 0,919867638 |
| Mir670    | 0,34  | 0,480721497 | -0,12 | 0,853735712 | -0,29 | 0,778383291 | 0,03  | 0,946615246 | -0,23 | 0,697757911 |
| Mir672    | 0,26  | 0,518267881 | 0,05  | 0,927073711 | -0,24 | 0,727262258 | -0,07 | 0,882842038 | -0,04 | 0,969617491 |
| Mir673    | 0,21  | 0,674445329 | 0,09  | 0,855974935 | 0,02  | 0,990836784 | -0,1  | 0,835143396 | 0,15  | 0,841160223 |
| Mir674    | 0,26  | 0,898572877 | 0,29  | 0,730602188 | -0,41 | 0,66170364  | 1,43  | 0,325923875 | 0,41  | 0,816731898 |
| Mir676    | 0,19  | 0,675123368 | -0,18 | 0,720902851 | -0,04 | 0,94940954  | 0,25  | 0,51577838  | 0,11  | 0,869765418 |
| Mir677    | 0,02  | 0,996998625 | 0,4   | 0,896003756 | -0,85 | 0,483029329 | 0,47  | 0,886780658 | 1,12  | 0,655956123 |

|          |       |             |       |             |       |             |       |             |       |             |
|----------|-------|-------------|-------|-------------|-------|-------------|-------|-------------|-------|-------------|
| Mir679   | -0,09 | 0,902739886 | -0,31 | 0,667422905 | -0,64 | 0,219362501 | 0,13  | 0,728133234 | -0,27 | 0,725669526 |
| Mir680-1 | 0,69  | 0,214407528 | 1,01  | 0,269411482 | -0,47 | 0,364709224 | -0,4  | 0,290774064 | 1,06  | 0,12042444  |
| Mir680-2 | 0,97  | 0,051263109 | 0,67  | 0,141157706 | -1,01 | 0,032938865 | -0,44 | 0,511135163 | 0,88  | 0,197214574 |
| Mir680-3 | 0,43  | 0,478607511 | -0,25 | 0,49761736  | -0,26 | 0,75035341  | 0,18  | 0,825017636 | 0,33  | 0,769280739 |
| Mir681   | -0,16 | 0,733583213 | 0,15  | 0,826165513 | -0,19 | 0,700186861 | 0,18  | 0,687560664 | -0,02 | 0,979456872 |
| Mir687   | 0,02  | 0,963865514 | -0,24 | 0,756555599 | 0,37  | 0,743001036 | -0,3  | 0,860277936 | 0,28  | 0,948663154 |
| Mir688   | -0,42 | 0,278797445 | 0,06  | 0,95429671  | -1,03 | 0,559168054 | 0,05  | 0,929835301 | 0,22  | 0,830813323 |
| Mir690   | 0     | 0,996998625 | -0,11 | 0,816121519 | -0,15 | 0,782988471 | 0,04  | 0,959780463 | 0,27  | 0,626176831 |
| Mir691   | 0,09  | 0,84357861  | 0,13  | 0,792069553 | 0,16  | 0,791940256 | 0,14  | 0,744773464 | 0,14  | 0,827643075 |
| Mir692-1 | 0,29  | 0,430696208 | 0,1   | 0,820137069 | 0,07  | 0,947881687 | 0,17  | 0,599989705 | 0,38  | 0,395115041 |
| Mir693   | 0,11  | 0,835208982 | 0,04  | 0,939172527 | -0,12 | 0,878688944 | 0,06  | 0,889364462 | -0,14 | 0,860292816 |
| Mir694   | 0,12  | 0,787272049 | -0,13 | 0,837870165 | 0,21  | 0,706714392 | -0,01 | 0,982212444 | 0,01  | 0,9893747   |
| Mir6945  | 0,3   | 0,698849033 | 0,32  | 0,716668427 | -0,53 | 0,683395174 | 0,41  | 0,662901576 | -0,1  | 0,962872595 |
| Mir695   | 0,13  | 0,787408874 | -0,01 | 0,999395995 | -0,01 | 0,994008884 | -0,03 | 0,951765845 | 0,19  | 0,839969557 |
| Mir697   | 0,73  | 0,509815996 | 0,51  | 0,641792237 | 0,53  | 0,379638471 | 0,04  | 0,968211182 | 0,1   | 0,948935854 |
| Mir698   | 0,22  | 0,74672311  | 0     | 1           | -0,39 | 0,344607988 | -0,17 | 0,639359737 | -0,01 | 0,98830849  |
| Mir701   | 0,63  | 0,72556358  | -1,59 | 0,212460435 | -1,78 | 0,292557534 | 0,71  | 0,841354324 | -0,17 | 0,977945762 |
| Mir702   | 0,2   | 0,775757259 | 0,11  | 0,817367084 | -0,68 | 0,379638471 | 0,1   | 0,90213506  | 0,17  | 0,825564898 |
| Mir704   | -0,72 | 0,697992827 | 0,08  | 0,940925346 | -2,02 | 0,215153182 | -0,38 | 0,715804103 | 0,4   | 0,80155635  |
| Mir708   | -0,01 | 0,98659023  | 0,03  | 0,958545812 | -0,22 | 0,783052291 | -0,03 | 0,949669541 | -0,02 | 0,983613958 |
| Mir709   | 0,8   | 0,093379419 | 0,53  | 0,724005117 | -0,3  | 0,888677583 | -0,32 | 0,614988695 | 1,08  | 0,053570529 |
| Mir7-1   | 1,35  | 0,180862229 | 0,32  | 0,510894317 | -0,59 | 0,427329305 | 0,4   | 0,3361004   | 0,28  | 0,731865047 |
| Mir710   | 0,32  | 0,722504009 | 0     | 1           | -0,11 | 0,864292935 | 0,02  | 0,962043341 | 0,29  | 0,654872635 |
| Mir711   | 0,24  | 0,579630863 | 0,09  | 0,841184864 | -0,05 | 0,953265007 | -0,29 | 0,428295778 | -0,5  | 0,287504534 |
| Mir717   | 0,04  | 0,943538971 | -0,04 | 0,92856048  | -0,2  | 0,720069267 | -0,05 | 0,90213506  | -0,13 | 0,864540232 |
| Mir7-2   | -0,16 | 0,822676888 | 0,03  | 0,944460988 | -0,26 | 0,641366948 | -0,12 | 0,868114518 | 0,16  | 0,86809582  |
| Mir721   | -0,25 | 0,720977065 | -0,52 | 0,589281517 | 0,07  | 0,943472333 | 0,89  | 0,32544186  | 0,15  | 0,879206646 |
| Mir741   | 0,04  | 0,959218841 | 0     | 0,997700959 | -0,12 | 0,841143044 | 0,03  | 0,949166455 | 0,07  | 0,923231067 |
| Mir742   | -0,05 | 0,915995296 | 0,07  | 0,88741189  | -0,24 | 0,604412818 | 0     | 0,999811182 | 0,09  | 0,901007891 |
| Mir743   | 0,09  | 0,908281692 | 0,13  | 0,824372931 | 0,63  | 0,245544725 | -0,04 | 0,915532343 | -0,62 | 0,211308904 |
| Mir743b  | 0,15  | 0,703606438 | -0,09 | 0,864171096 | -0,22 | 0,736837174 | 0,09  | 0,832520885 | 0,31  | 0,669149621 |
| Mir744   | 0,13  | 0,854588321 | 0,12  | 0,857874036 | 0,07  | 0,947034823 | 0,15  | 0,721611115 | 0,04  | 0,96176496  |
| Mir758   | -0,14 | 0,742618851 | -0,13 | 0,785233208 | 0,06  | 0,952366216 | 0,08  | 0,828125777 | -0,12 | 0,848977077 |
| Mir759   | 0,07  | 0,887137875 | 0,04  | 0,929289366 | -0,1  | 0,868855417 | -0,04 | 0,933481887 | 0,26  | 0,697818445 |
| Mir760   | 0,17  | 0,70137787  | -0,06 | 0,904258936 | -0,16 | 0,792886254 | 0,2   | 0,599572973 | 0,36  | 0,558284622 |



|            |       |             |       |             |       |             |       |             |       |             |
|------------|-------|-------------|-------|-------------|-------|-------------|-------|-------------|-------|-------------|
| Mir761     | 0,14  | 0,7354177   | 0,03  | 0,973782672 | -0,24 | 0,674253263 | -0,24 | 0,561759616 | -0,13 | 0,856534656 |
| Mir763     | 0,06  | 0,925019201 | -0,03 | 0,955382206 | 0,3   | 0,767822182 | 0,01  | 0,982985345 | 0,11  | 0,891991231 |
| Mir764     | 0,03  | 0,968309565 | 0,11  | 0,806846739 | -0,06 | 0,925417014 | -0,01 | 0,982985345 | 0,02  | 0,980306863 |
| Mir767     | 0,24  | 0,621070092 | 0,17  | 0,734199028 | -0,18 | 0,811424918 | -0,15 | 0,691668858 | -0,31 | 0,559721978 |
| Mir7b      | -0,09 | 0,83193828  | 0,07  | 0,932292974 | -0,02 | 0,974100764 | 0,07  | 0,876895238 | -0,07 | 0,937446198 |
| Mir802     | 0,01  | 0,98225675  | 0     | 1           | -0,01 | 0,993716437 | 0,08  | 0,828361053 | 0,05  | 0,94989088  |
| Mir804     | -0,08 | 0,914180919 | 0,02  | 0,984000632 | -0,18 | 0,725191296 | -0,15 | 0,787778344 | -0,26 | 0,697336851 |
| Mir871     | 0,03  | 0,950669622 | -0,1  | 0,831580851 | 0,03  | 0,969476711 | 0,05  | 0,908141892 | 0,06  | 0,952435416 |
| Mir872     | -0,04 | 0,950669622 | 0,16  | 0,82485467  | -0,16 | 0,809137779 | -0,14 | 0,715208764 | -0,08 | 0,939258449 |
| Mir873a    | -0,01 | 0,992774066 | 0,07  | 0,931316337 | -0,06 | 0,932577939 | 0,14  | 0,684777287 | 0,13  | 0,840531579 |
| Mir874     | 0,05  | 0,968236663 | -0,02 | 0,975765252 | -0,2  | 0,735042777 | 0,02  | 0,983166423 | 0,26  | 0,729876686 |
| Mir875     | 0,02  | 0,972164346 | 0,07  | 0,890351318 | -0,04 | 0,957743357 | -0,03 | 0,949166455 | -0,1  | 0,876634949 |
| Mir876     | 0,03  | 0,952453567 | 0     | 1           | -0,22 | 0,628978443 | -0,01 | 0,992906132 | -0,03 | 0,969617491 |
| Mir877     | 0,16  | 0,827804129 | -0,19 | 0,764406705 | -0,8  | 0,121081465 | 0,08  | 0,835175707 | -0,13 | 0,884321797 |
| Mir878     | -0,24 | 0,59037412  | -0,01 | 0,989036108 | 0,06  | 0,923258105 | 0     | 1           | -0,1  | 0,885453886 |
| Mir879     | 0,03  | 0,953968421 | -0,13 | 0,792290003 | 0,14  | 0,825914825 | -0,03 | 0,953420981 | -0,16 | 0,795033998 |
| Mir880     | 0,2   | 0,694699901 | 0     | 1           | -0,13 | 0,827761588 | 0     | 1           | -0,06 | 0,932268703 |
| Mir881     | -0,02 | 0,973458531 | 0     | 0,999210601 | -0,16 | 0,736136695 | 0,01  | 0,982534991 | -0,01 | 0,992980215 |
| Mir882     | 0,11  | 0,919567534 | 0,12  | 0,842663656 | -0,09 | 0,901816517 | -0,06 | 0,874904932 | 0,27  | 0,587735967 |
| Mir883a    | 0,05  | 0,965116762 | 0,14  | 0,781013517 | 0,29  | 0,651559391 | -0,14 | 0,825017636 | 0,14  | 0,868167014 |
| Mir883b    | 0,09  | 0,869225685 | -0,23 | 0,767178812 | -0,24 | 0,725725788 | 0     | 1           | 0,23  | 0,757562438 |
| Mir9-1     | 0,24  | 0,778869381 | -0,11 | 0,826722506 | -0,38 | 0,606696556 | -0,22 | 0,722307071 | 0,02  | 0,985088088 |
| Mir92-2    | 0,64  | 0,469692532 | 0,1   | 0,858064544 | -0,26 | 0,736445534 | -0,59 | 0,280986733 | -0,45 | 0,444241195 |
| Mir92b     | 0,25  | 0,54401985  | -0,07 | 0,905442333 | -0,34 | 0,545465016 | 0,11  | 0,759805335 | -0,06 | 0,947757536 |
| Mir93      | -0,06 | 0,926692467 | 0,06  | 0,901321339 | -0,14 | 0,841563482 | -0,03 | 0,95852873  | 0,08  | 0,932268703 |
| Mir9-3     | -0,05 | 0,926452636 | -0,02 | 0,972776489 | 0,13  | 0,875434047 | 0,05  | 0,917756311 | -0,12 | 0,894192218 |
| Mir96      | 0,19  | 0,765643907 | 0,16  | 0,750160982 | 0,05  | 0,947890113 | -0,13 | 0,806497386 | -0,18 | 0,837765872 |
| Mir98      | 0,27  | 0,516193908 | -0,27 | 0,781665479 | -0,28 | 0,646965864 | 0,34  | 0,696607541 | 0,03  | 0,981677577 |
| Mir99a     | 0,21  | 0,800851935 | 0,23  | 0,689195735 | -0,16 | 0,808747196 | -0,18 | 0,829691356 | 0,47  | 0,742614391 |
| Mir99ahg   | 0,01  | 0,986904999 | 0,23  | 0,692189927 | -0,07 | 0,95907725  | -2,09 | 0,020217488 | 0,63  | 0,689031841 |
| Mir99b     | 0,04  | 0,932324918 | 0,05  | 0,932292974 | -0,02 | 0,979788785 | -0,08 | 0,84745429  | 0,28  | 0,603018253 |
| Mirg       | 0,43  | 0,358601142 | -0,02 | 0,978904487 | -0,11 | 0,867152476 | 0,03  | 0,976825528 | 0,45  | 0,58512161  |
| Mirlet7a-1 | 0,28  | 0,553764503 | 0,36  | 0,370515616 | 0,08  | 0,920124188 | -0,02 | 0,965175496 | 0,37  | 0,440575593 |
| Mirlet7a-2 | 0,29  | 0,640002115 | 0,68  | 0,520395205 | -0,11 | 0,904057901 | -0,1  | 0,87148686  | 0,39  | 0,493920965 |
| Mirlet7c-1 | 0,05  | 0,939317944 | -0,03 | 0,965589332 | -0,2  | 0,709222239 | 0,19  | 0,671346789 | 0,22  | 0,849560772 |

|            |       |             |       |             |       |             |       |             |       |             |
|------------|-------|-------------|-------|-------------|-------|-------------|-------|-------------|-------|-------------|
| Mirlet7d   | 0,18  | 0,869225685 | -0,26 | 0,79295936  | -0,6  | 0,339425194 | 0,12  | 0,887045509 | 0,22  | 0,856021984 |
| Mirlet7e   | 0,69  | 0,119287013 | -0,03 | 0,979190097 | -0,52 | 0,660920525 | 0,1   | 0,855041248 | 0,27  | 0,823098095 |
| Mirlet7f-1 | -0,02 | 0,991919022 | 0,05  | 0,935329426 | -0,03 | 0,973802765 | 0,01  | 0,993869623 | 0,21  | 0,79265811  |
| Mirlet7f-2 | -0,09 | 0,912573929 | 0     | 1           | -0,15 | 0,820823892 | -0,18 | 0,727187179 | -0,1  | 0,917354221 |
| Mirlet7g   | 0,42  | 0,528638029 | -0,28 | 0,694422914 | -1,36 | 0,398303268 | -0,48 | 0,698113661 | -0,12 | 0,956610289 |
| Mirlet7i   | 0,14  | 0,778869381 | 0,05  | 0,925520621 | -0,54 | 0,512995479 | -0,02 | 0,970931237 | 0,04  | 0,954004872 |
| Mirt1      | -0,14 | 0,814444163 | -0,18 | 0,741529472 | 0,45  | 0,747847718 | 0,5   | 0,584784352 | 0,08  | 0,954316248 |
| Mirt2      | -0,37 | 0,61532722  | -0,01 | 0,984121306 | 0,15  | 0,903675834 | 0,5   | 0,12874649  | 0,24  | 0,661912448 |
| Mis12      | -0,08 | 0,962399085 | -0,02 | 0,994148616 | 2     | 0,02204647  | -0,26 | 0,57372642  | -0,22 | 0,815693459 |
| Mis18a     | 0,23  | 0,766575514 | -0,1  | 0,955623088 | 0,01  | 0,998425248 | -0,89 | 0,171625869 | -0,42 | 0,721051194 |
| Mis18bp1   | -0,6  | 0,180356049 | -1,14 | 0,339759694 | 1,41  | 0,037381207 | 1,48  | 0,091733474 | -0,61 | 0,540811545 |
| Misp       | -0,04 | 0,964502812 | 0,87  | 0,213731156 | 0,01  | 0,991568687 | -1,3  | 0,041009258 | -0,16 | 0,868494821 |
| Mitd1      | 0,07  | 0,929634271 | 0,25  | 0,817367084 | -0,24 | 0,761861872 | 0,19  | 0,610149813 | 1,28  | 0,013202628 |
| Mitf       | 0,26  | 0,841267394 | 0,67  | 0,622161495 | 0,21  | 0,856605654 | -0,61 | 0,23279172  | 0,31  | 0,801051293 |
| Mixl1      | -0,19 | 0,758514941 | 0,13  | 0,79295936  | -0,05 | 0,959792746 | 0,12  | 0,77859184  | 0,24  | 0,675282484 |
| Mki67      | -1,76 | 0,024768323 | -1,81 | 0,15478032  | 2,07  | 0,042672401 | 3,55  | 0,008249806 | -0,67 | 0,335679372 |
| Mkks       | -0,3  | 0,753380344 | -0,06 | 0,934294134 | 0,42  | 0,815942732 | -0,47 | 0,397216038 | -0,25 | 0,825564898 |
| Mkl1       | -0,05 | 0,959985598 | -0,31 | 0,594415097 | 0,27  | 0,536864478 | 0,57  | 0,112206337 | -0,1  | 0,893737959 |
| Mkl2       | -0,61 | 0,142347138 | -0,58 | 0,362188015 | 0,13  | 0,889371168 | -0,1  | 0,818318954 | -1,37 | 0,015444217 |
| Mkln1      | 0,19  | 0,836877571 | 0,33  | 0,568304052 | 0,24  | 0,863181793 | -0,25 | 0,506357609 | 0,33  | 0,528089671 |
| Mkln1os    | 0,09  | 0,927051853 | -0,05 | 0,979551751 | -0,09 | 0,941254389 | 0,26  | 0,509774032 | 0,03  | 0,978604922 |
| Mknk1      | -0,17 | 0,829299665 | -0,1  | 0,843162191 | -0,15 | 0,911601881 | 0,66  | 0,252222025 | -0,43 | 0,559077856 |
| Mknk2      | -0,63 | 0,149740371 | 0,11  | 0,800176188 | 0,11  | 0,878059365 | -0,7  | 0,059980837 | -0,62 | 0,177107797 |
| Mkrn1      | -0,2  | 0,860773832 | 0,22  | 0,709432782 | -0,37 | 0,688169434 | -1,01 | 0,032043244 | -0,44 | 0,424655054 |
| Mkrn2      | -0,4  | 0,540951867 | 0,3   | 0,6840278   | -0,24 | 0,756730031 | -0,47 | 0,331166732 | 0,19  | 0,801385411 |
| Mkrn2os    | -0,1  | 0,884171483 | -0,09 | 0,894205636 | -0,01 | 0,995074319 | 0,06  | 0,938277594 | 0,17  | 0,819072786 |
| Mkrn3      | 0,19  | 0,715591802 | 0,24  | 0,897859783 | -0,14 | 0,841510741 | -0,32 | 0,305622634 | -0,03 | 0,979456872 |
| Mks1       | 0,41  | 0,476127145 | -0,32 | 0,77325041  | -0,01 | 0,990836784 | 0     | 0,998045844 | -0,33 | 0,563077271 |
| Mkx        | 0,22  | 0,664036618 | 0,36  | 0,694017753 | -0,47 | 0,439491072 | -0,42 | 0,42551403  | -0,76 | 0,369835412 |
| Mlana      | -0,06 | 0,921898929 | -0,23 | 0,841184864 | 0,05  | 0,961573489 | 0,13  | 0,782872611 | 0,03  | 0,980961333 |
| Mlc1       | 0,48  | 0,246908489 | 0,12  | 0,903682621 | 0,08  | 0,942112992 | -0,21 | 0,745989736 | 0,15  | 0,848414973 |
| Mlec       | -0,19 | 0,743650884 | 0,23  | 0,78728026  | 0,54  | 0,470538686 | -1,97 | 0,020713005 | -0,15 | 0,844105751 |
| Mlf1       | -0,33 | 0,655130976 | -0,43 | 0,651587568 | 0,43  | 0,706842882 | 0,72  | 0,246648596 | 0,35  | 0,607365616 |
| Mlf2       | -0,45 | 0,325058036 | -0,26 | 0,627120896 | 0,52  | 0,305948438 | 0,68  | 0,116591154 | -0,34 | 0,573106355 |
| Mlh1       | -0,49 | 0,3621446   | -0,33 | 0,589733014 | 0,6   | 0,650638751 | 0,3   | 0,474989577 | -0,2  | 0,864373858 |

|        |       |             |       |             |       |             |       |             |       |             |
|--------|-------|-------------|-------|-------------|-------|-------------|-------|-------------|-------|-------------|
| Mlh3   | -0,99 | 0,109168138 | 0,09  | 0,943205471 | 0,59  | 0,399470425 | -1,21 | 0,156217103 | -0,84 | 0,332651989 |
| Mlip   | 0     | 0,997842309 | -0,42 | 0,561004864 | -0,01 | 0,99416325  | 0,27  | 0,604842873 | 0,26  | 0,760657649 |
| Mlkl   | 0,07  | 0,915894799 | 0,23  | 0,686540452 | -0,89 | 0,179552168 | 0,82  | 0,094905894 | 1,46  | 0,02019977  |
| Mllt1  | -0,27 | 0,660482793 | -0,31 | 0,56691167  | 0,09  | 0,901798075 | 0,57  | 0,169889451 | 0,05  | 0,950267521 |
| Mllt10 | 0,19  | 0,791959729 | 0,17  | 0,716661568 | -0,08 | 0,916403684 | 0,13  | 0,707902199 | 0,33  | 0,619880944 |
| Mllt11 | -0,72 | 0,272587269 | 0,27  | 0,619025787 | 0,55  | 0,475398917 | 0,49  | 0,190379644 | -0,47 | 0,322519045 |
| Mllt3  | 0,98  | 0,264937591 | 0,73  | 0,234264913 | -1,11 | 0,268215952 | -0,79 | 0,212666842 | 0,88  | 0,148699692 |
| Mllt4  | -0,3  | 0,489042022 | -0,04 | 0,960707924 | -0,26 | 0,752757867 | 0,07  | 0,90529096  | 0,19  | 0,78960943  |
| Mllt6  | -0,15 | 0,771904131 | -0,05 | 0,956441911 | 0,17  | 0,83346229  | -1,04 | 0,031624209 | -0,38 | 0,504201737 |
| Mlph   | -0,28 | 0,50667946  | -0,32 | 0,814801834 | 0,89  | 0,086991079 | -0,66 | 0,270345878 | -0,07 | 0,954565959 |
| Mlst8  | -0,36 | 0,496123406 | 0,25  | 0,730790812 | 0,16  | 0,807786405 | 0,02  | 0,982985345 | -0,2  | 0,765809384 |
| Mlx    | -0,24 | 0,672428769 | 0,11  | 0,904258936 | 0,78  | 0,541560473 | 0,04  | 0,963392781 | -0,3  | 0,680822005 |
| Mlxip  | 0,67  | 0,154176894 | 0,7   | 0,483436169 | 0,03  | 0,987390039 | -0,98 | 0,138325955 | -0,02 | 0,981913783 |
| Mlxipl | -0,22 | 0,729192619 | -0,09 | 0,965147491 | -0,03 | 0,967304745 | 0,12  | 0,863504483 | 0,6   | 0,352110675 |
| Mlycd  | -0,11 | 0,905414735 | -0,17 | 0,817110093 | -0,15 | 0,875434047 | -0,15 | 0,779181428 | -0,47 | 0,59705803  |
| Mmaa   | -0,23 | 0,816710776 | 0,16  | 0,911148146 | -0,13 | 0,887977305 | 0,2   | 0,845813504 | 0,47  | 0,710030921 |
| Mmab   | -0,37 | 0,685826767 | -0,25 | 0,88741189  | 0,18  | 0,849342965 | 1,16  | 0,05846048  | 0,28  | 0,741766428 |
| Mmachc | 0,01  | 0,995438679 | -0,59 | 0,470112519 | 0,41  | 0,649080035 | 0,86  | 0,642766157 | -0,41 | 0,861038502 |
| Mmadhc | -0,83 | 0,424529546 | -0,08 | 0,916338327 | 0,28  | 0,697776023 | 0,46  | 0,336611912 | 0,28  | 0,720312918 |
| Mmd    | -0,63 | 0,293334505 | -0,48 | 0,243936374 | 0,21  | 0,739874064 | 0,36  | 0,378869149 | -1,13 | 0,106983116 |
| Mmd2   | 0     | 0,99826135  | -0,07 | 0,976423495 | 0,08  | 0,911205034 | -0,17 | 0,677203644 | 0,26  | 0,718058232 |
| Mme    | 0,82  | 0,477363665 | -0,15 | 0,909658961 | 0,17  | 0,909126689 | -0,3  | 0,549586333 | 0,16  | 0,924811768 |
| Mmel1  | -0,25 | 0,595245851 | 0,5   | 0,410501758 | -0,58 | 0,329525512 | 0,07  | 0,9540749   | 0,41  | 0,708051749 |
| Mmgt1  | -0,26 | 0,649628704 | -0,29 | 0,664787536 | 0,42  | 0,543309542 | 0,43  | 0,182595927 | -0,21 | 0,776025316 |
| Mmgt2  | 0,02  | 0,975341177 | 0,35  | 0,561004864 | 0,58  | 0,342219539 | -0,03 | 0,982613682 | -0,41 | 0,742982183 |
| Mmp10  | -0,36 | 0,526468351 | -0,16 | 0,868538818 | 0,9   | 0,271482188 | 0,28  | 0,664146201 | -0,06 | 0,954715142 |
| Mmp11  | -0,22 | 0,764288636 | -0,59 | 0,165411019 | 1,13  | 0,175929323 | -1,83 | 0,009399265 | -1,56 | 0,029071378 |
| Mmp12  | -0,28 | 0,760660571 | 0,23  | 0,771641267 | 2,49  | 0,003093494 | -0,13 | 0,875473756 | 0,43  | 0,606745732 |
| Mmp13  | 1,08  | 0,543161718 | -0,76 | 0,740759095 | 1,36  | 0,208426369 | 1,47  | 0,011082355 | 0,11  | 0,904636459 |
| Mmp14  | -0,35 | 0,317670222 | -0,16 | 0,782652703 | 0,69  | 0,068894819 | 4,08  | 0,008006726 | -0,26 | 0,853774308 |
| Mmp15  | -0,94 | 0,067711244 | -0,66 | 0,231183878 | 1,29  | 0,023519161 | 1,04  | 0,069737057 | -1,03 | 0,053907225 |
| Mmp16  | 0,38  | 0,677867423 | 0,29  | 0,738287936 | 0,02  | 0,982305856 | -1,95 | 0,010913137 | -0,11 | 0,917400864 |
| Mmp17  | 0,21  | 0,704641551 | 0     | 1           | -0,16 | 0,789969951 | -1,04 | 0,190749766 | 0,15  | 0,902101131 |
| Mmp19  | -0,03 | 0,984759626 | -0,63 | 0,524408973 | 0,23  | 0,744387748 | 0,64  | 0,41819556  | 0,15  | 0,939127163 |
| Mmp1a  | -0,11 | 0,914758024 | -0,18 | 0,853735712 | -0,29 | 0,76321105  | 0,53  | 0,376628904 | 0,21  | 0,765809384 |

|         |       |             |       |             |       |             |       |             |       |             |
|---------|-------|-------------|-------|-------------|-------|-------------|-------|-------------|-------|-------------|
| Mmp1b   | -0,13 | 0,859825896 | 0,29  | 0,756778611 | -0,19 | 0,808747196 | -0,26 | 0,675157023 | 0,06  | 0,953297732 |
| Mmp2    | -1,29 | 0,15490509  | -0,8  | 0,615606512 | 0,79  | 0,211666713 | -0,13 | 0,923403061 | -1,02 | 0,290947419 |
| Mmp20   | -0,03 | 0,970938013 | -0,47 | 0,482624827 | -0,2  | 0,727879469 | -0,06 | 0,944769683 | -0,17 | 0,858872204 |
| Mmp21   | -0,22 | 0,685826767 | 0,32  | 0,812432185 | -0,04 | 0,955303601 | -0,36 | 0,660799062 | -0,21 | 0,827532593 |
| Mmp23   | 0,15  | 0,862160773 | 0,4   | 0,624860312 | 0,33  | 0,708335441 | -0,15 | 0,715825968 | 0,14  | 0,903142209 |
| Mmp24   | -0,22 | 0,663119768 | -0,04 | 0,955891382 | 0,15  | 0,830517657 | -0,17 | 0,784621098 | -0,18 | 0,831834722 |
| Mmp25   | 0,87  | 0,165137501 | 0,65  | 0,441733752 | -0,26 | 0,852743309 | -0,13 | 0,871321071 | -0,77 | 0,320588885 |
| Mmp27   | 0,05  | 0,959714813 | -0,14 | 0,833915565 | -0,15 | 0,817583707 | 0,14  | 0,71853109  | -0,16 | 0,865258929 |
| Mmp28   | -0,39 | 0,653306609 | -0,32 | 0,574304911 | -0,03 | 0,980447951 | -2    | 0,008488923 | -0,88 | 0,150296522 |
| Mmp3    | -0,23 | 0,902361035 | 0,69  | 0,508267988 | 0,87  | 0,617196283 | -0,19 | 0,789616492 | 0,28  | 0,755320653 |
| Mmp7    | -0,07 | 0,933039028 | -0,35 | 0,483436169 | 0,03  | 0,968330792 | 0,44  | 0,439363043 | -0,03 | 0,97872616  |
| Mmp8    | 0,48  | 0,314547808 | 0,07  | 0,916496897 | -0,73 | 0,682931047 | 0,15  | 0,729857506 | 0,12  | 0,883592868 |
| Mmp9    | 0,54  | 0,461113298 | -0,27 | 0,858102858 | 0,43  | 0,650946175 | 0,07  | 0,95852873  | 0,03  | 0,988334908 |
| Mmrn1   | 0,14  | 0,944652244 | 0,83  | 0,531706188 | -0,47 | 0,661089127 | -4,18 | 0,007919254 | -0,72 | 0,217859301 |
| Mmrn2   | -0,24 | 0,552995103 | -0,17 | 0,729172466 | -0,13 | 0,824279952 | -0,28 | 0,380029536 | -0,14 | 0,826206511 |
| Mms19   | 0,45  | 0,342580105 | 0,13  | 0,802657918 | -0,11 | 0,909371204 | 0,56  | 0,274059929 | 0,07  | 0,947559952 |
| Mms22l  | -1,86 | 0,024768323 | -1,83 | 0,084290601 | 2,17  | 0,059939274 | 2,81  | 0,076444347 | -0,38 | 0,83730774  |
| Mn1     | -0,36 | 0,318333634 | -0,18 | 0,824927818 | 0,18  | 0,811480974 | -0,04 | 0,938209847 | 0,1   | 0,909363599 |
| Mnat1   | -0,31 | 0,447068257 | -0,21 | 0,740517638 | -0,12 | 0,836328669 | 0,7   | 0,090521834 | 0     | 0,997769477 |
| Mnd1    | -0,27 | 0,728608769 | -0,78 | 0,634766808 | 0,77  | 0,337509636 | 1,19  | 0,427671547 | -0,27 | 0,892349039 |
| Mnd1-ps | -0,06 | 0,913546177 | 0,06  | 0,892902296 | -0,02 | 0,97548193  | -0,05 | 0,947940753 | 0,06  | 0,952971656 |
| Mnda    | 1,65  | 0,097625832 | 1,31  | 0,070776028 | -1,46 | 0,01395211  | 0,37  | 0,695852344 | 1,77  | 0,040775923 |
| Mndal   | 1,14  | 0,187868882 | 0,79  | 0,29443543  | -1,99 | 0,016208401 | -0,11 | 0,841103649 | 1,17  | 0,026772305 |
| Mns1    | -0,73 | 0,131867776 | -1,05 | 0,125853832 | 0,46  | 0,663652196 | 1,44  | 0,087952172 | 0,13  | 0,918321494 |
| Mnt     | -0,26 | 0,725011822 | -0,16 | 0,790939978 | -0,24 | 0,755042381 | -0,19 | 0,700309792 | -0,14 | 0,844105751 |
| Mnx1    | -0,19 | 0,799359492 | -0,12 | 0,892869412 | -0,09 | 0,9113279   | -0,22 | 0,776452453 | -0,34 | 0,664273475 |
| Moap1   | -0,39 | 0,264937591 | -0,13 | 0,896890904 | -0,03 | 0,989541468 | -0,58 | 0,367104963 | -0,76 | 0,412253278 |
| Mob1a   | -0,14 | 0,875555348 | -0,01 | 0,993800088 | 0,19  | 0,811480974 | 0,4   | 0,391807778 | 0,27  | 0,697818445 |
| Mob1b   | -0,07 | 0,948926586 | 0,3   | 0,518494408 | -0,1  | 0,93077684  | 0,68  | 0,1122689   | 0,34  | 0,669149621 |
| Mob2    | 0     | 1           | -0,18 | 0,655345408 | 0,08  | 0,928438649 | -0,65 | 0,073347505 | -0,25 | 0,673120647 |
| Mob3a   | 0,11  | 0,882760071 | 0,39  | 0,553012845 | 0,84  | 0,626467695 | 0,66  | 0,228568393 | 0,21  | 0,841538812 |
| Mob3b   | 0,37  | 0,492894586 | 0,11  | 0,891749049 | 0,42  | 0,688298291 | -0,91 | 0,091159146 | -0,1  | 0,963891318 |
| Mob3c   | 0,33  | 0,443480638 | 0,6   | 0,214321569 | -0,82 | 0,154586266 | 0,33  | 0,486855023 | 0,25  | 0,845510422 |
| Mob4    | -0,11 | 0,849132559 | 0,12  | 0,817110093 | -0,03 | 0,978012085 | -0,06 | 0,906675262 | 0,11  | 0,875713596 |
| Mobp    | -0,02 | 0,983104894 | -0,07 | 0,938767983 | 0,32  | 0,50620307  | -0,18 | 0,658011013 | -0,33 | 0,565696273 |

|             |       |             |       |             |       |             |       |             |       |             |
|-------------|-------|-------------|-------|-------------|-------|-------------|-------|-------------|-------|-------------|
| Mocos       | -0,14 | 0,867243066 | -0,03 | 0,98230594  | -0,87 | 0,171388572 | -0,66 | 0,137287097 | 0,46  | 0,382080799 |
| Mocs1       | -0,22 | 0,767797797 | -0,04 | 0,975959817 | 0,36  | 0,579159818 | -0,36 | 0,711878469 | -0,04 | 0,979392852 |
| Mocs2       | 0,11  | 0,8634587   | 0,32  | 0,588131423 | 0,11  | 0,889968671 | -0,21 | 0,652134405 | -0,03 | 0,979456872 |
| Mocs3       | -0,31 | 0,421957622 | 0,23  | 0,854940418 | -0,11 | 0,94110925  | -0,22 | 0,701167068 | 0,07  | 0,951075094 |
| Mog         | -0,27 | 0,640002115 | 0,01  | 0,994148616 | -0,27 | 0,712697139 | -0,08 | 0,863843513 | -0,07 | 0,927873496 |
| Mogat1      | -0,1  | 0,925704402 | -0,29 | 0,682614659 | -0,02 | 0,989644794 | 0,44  | 0,450369357 | 0,24  | 0,762105118 |
| Mogat2      | -0,36 | 0,65197145  | -0,2  | 0,701043773 | 0,69  | 0,22657669  | 0,26  | 0,69271453  | -0,14 | 0,885673683 |
| Mogs        | -0,29 | 0,697356307 | -0,35 | 0,571092292 | 0,77  | 0,280799775 | 0,34  | 0,327997755 | -0,52 | 0,368099774 |
| Mok         | 0,01  | 0,993409935 | 0,31  | 0,693801781 | 0,18  | 0,88485244  | -0,09 | 0,875473756 | -0,41 | 0,486025914 |
| Mon1a       | -0,29 | 0,597519827 | -0,33 | 0,629816545 | 0,17  | 0,832155972 | 0,05  | 0,947477693 | -0,39 | 0,64987147  |
| Mon1b       | -0,2  | 0,728516314 | 0,73  | 0,326075089 | 0,03  | 0,974971222 | -0,52 | 0,406423769 | -0,14 | 0,883154336 |
| Mon2        | -0,06 | 0,949931783 | -0,22 | 0,640836969 | 0,26  | 0,727874974 | -0,11 | 0,847673187 | -0,27 | 0,743424157 |
| Morc1       | 0,44  | 0,302006612 | -0,02 | 0,982047684 | 0,05  | 0,967930981 | 0,23  | 0,673534755 | 0,09  | 0,939448119 |
| Morc2a      | -0,31 | 0,738714467 | -0,36 | 0,379721127 | 0,37  | 0,631855861 | 0,31  | 0,636309622 | -0,64 | 0,40189401  |
| Morc2b      | -0,31 | 0,613011358 | -0,2  | 0,839789639 | -0,2  | 0,794194778 | 0,53  | 0,217079936 | -0,25 | 0,810276195 |
| Morc3       | -0,01 | 0,994619271 | 0,23  | 0,828818891 | -0,02 | 0,990836784 | 0,1   | 0,886806548 | 0,86  | 0,131482799 |
| Morc4       | -0,74 | 0,236802372 | -0,05 | 0,964757836 | 1,22  | 0,103013815 | 0,9   | 0,400185772 | -0,75 | 0,530072156 |
| Morf4I1     | 0,06  | 0,908527886 | -0,3  | 0,695823136 | 0     | 0,997394645 | 0,77  | 0,098577249 | 0,23  | 0,800540569 |
| Morf4I1-ps1 | 0,07  | 0,904491579 | 0,08  | 0,869702867 | -0,07 | 0,951106998 | 0,05  | 0,899003207 | -0,2  | 0,830013971 |
| Morf4I2     | 0     | 0,997487069 | 0,79  | 0,335724646 | 0,3   | 0,843617662 | 0,12  | 0,869497105 | 0,11  | 0,917844354 |
| Morn1       | -0,01 | 0,991190832 | 0,09  | 0,932292974 | 0     | 0,998704185 | -0,18 | 0,832383062 | -0,33 | 0,688608911 |
| Morn2       | -0,22 | 0,752970477 | -0,5  | 0,316641661 | 0,06  | 0,938771378 | 0,13  | 0,830741954 | -0,25 | 0,702402249 |
| Morn3       | -0,43 | 0,664036618 | -0,09 | 0,860142618 | -0,43 | 0,433353965 | 0,17  | 0,837974367 | 0,29  | 0,574285481 |
| Morn4       | -0,22 | 0,777335496 | 1,07  | 0,123975096 | -0,59 | 0,76994964  | -0,48 | 0,312690168 | -0,07 | 0,952462776 |
| Morn5       | 0,16  | 0,887389217 | 0,18  | 0,800029853 | -0,67 | 0,214702327 | 0,84  | 0,03784406  | 0,35  | 0,593298551 |
| Mos         | 0,14  | 0,786709661 | 0,29  | 0,647475869 | 0,31  | 0,571681705 | 0,18  | 0,863050144 | 0,24  | 0,829280005 |
| Mospd1      | -0,23 | 0,660979798 | -0,17 | 0,691058901 | 0,94  | 0,23829372  | 0,54  | 0,334704308 | -0,29 | 0,794006294 |
| Mospd2      | -0,14 | 0,840654169 | 0,06  | 0,926210163 | 0,09  | 0,903638403 | -2    | 0,009399265 | -0,14 | 0,834671019 |
| Mospd3      | -0,48 | 0,294137208 | -0,76 | 0,313787074 | 0,14  | 0,822658666 | 0,43  | 0,442074742 | -0,83 | 0,185922552 |
| Mospd4      | 0,16  | 0,782203502 | 0,15  | 0,83389171  | -0,24 | 0,683917899 | -0,02 | 0,970931237 | 0,24  | 0,814864454 |
| Mov10       | 0,29  | 0,664076959 | 0,31  | 0,638366221 | -0,16 | 0,876433095 | 0,85  | 0,115820245 | 0,6   | 0,240813036 |
| Mov10I1     | 0,26  | 0,791150064 | 0,11  | 0,868234125 | -0,11 | 0,892858294 | -0,12 | 0,832134224 | -0,18 | 0,89224731  |
| Moxd1       | -1,38 | 0,074890017 | -0,75 | 0,401208626 | 1,28  | 0,152926428 | 2,18  | 0,020395018 | 0,3   | 0,773401088 |
| Moxd2       | 0,19  | 0,782823969 | 0,38  | 0,485712513 | 0,07  | 0,939963707 | 0,27  | 0,623313665 | 0,59  | 0,257751018 |
| Mpc1        | -0,2  | 0,618093813 | 0,3   | 0,643100439 | -0,08 | 0,932866273 | 0,2   | 0,669188204 | 0,38  | 0,444327869 |

|           |       |             |       |             |       |             |       |             |       |             |
|-----------|-------|-------------|-------|-------------|-------|-------------|-------|-------------|-------|-------------|
| Mpc2      | 0,18  | 0,867574449 | -0,7  | 0,295775341 | -0,4  | 0,705621758 | 0,85  | 0,16669046  | 0,28  | 0,788546035 |
| Mpdu1     | 0,17  | 0,744633581 | 0,1   | 0,897645724 | 0,19  | 0,751758339 | 0,13  | 0,88241606  | -0,38 | 0,616680786 |
| Mpdz      | -0,55 | 0,185492478 | -0,1  | 0,926353869 | 0,14  | 0,857676485 | -0,08 | 0,945619692 | -0,03 | 0,984125319 |
| Mpeg1     | 2,54  | 0,049002071 | 1,99  | 0,060440503 | -2,24 | 0,00990492  | 0,53  | 0,362484696 | 2,8   | 0,00179471  |
| Mpg       | -0,24 | 0,788898468 | 0,28  | 0,731503149 | 0,18  | 0,856046789 | -0,18 | 0,672990452 | -0,01 | 0,993865559 |
| Mphosph10 | -0,13 | 0,883754727 | -0,08 | 0,96497149  | 0,6   | 0,488083773 | 0,28  | 0,698410478 | 0,11  | 0,927296036 |
| Mphosph6  | -0,27 | 0,764189777 | -0,07 | 0,954948291 | 0,8   | 0,304667579 | 1,59  | 0,097710906 | 0,88  | 0,368678392 |
| Mphosph8  | -0,41 | 0,656726345 | -0,25 | 0,703289221 | 1,12  | 0,197507065 | -0,87 | 0,499512231 | 0,1   | 0,961303869 |
| Mphosph9  | -0,74 | 0,074890017 | -0,49 | 0,336330453 | 1,03  | 0,050740082 | -0,01 | 0,98427899  | -0,08 | 0,943668392 |
| Mpi       | -0,36 | 0,464531121 | -0,18 | 0,740134807 | -0,12 | 0,923781798 | 0,86  | 0,169916512 | -0,11 | 0,914176188 |
| Mpl       | -0,21 | 0,69656531  | 0,54  | 0,490905542 | 0,22  | 0,766796774 | -0,23 | 0,679295468 | -0,16 | 0,876418697 |
| Mplkip    | -0,22 | 0,683531628 | -0,09 | 0,942166578 | 0,29  | 0,637321546 | -0,39 | 0,533941098 | -0,12 | 0,864540232 |
| Mpnd      | 0,12  | 0,823423943 | -0,05 | 0,938711163 | 0,35  | 0,63712795  | 0,16  | 0,733638583 | -0,49 | 0,336241717 |
| Mpo       | -0,39 | 0,569100385 | 0,34  | 0,703041962 | 0,03  | 0,968874924 | -0,12 | 0,800899563 | 0,02  | 0,983613958 |
| Mpp1      | 0,71  | 0,154338294 | 0,58  | 0,229666828 | -0,19 | 0,825914825 | -0,17 | 0,765492742 | 0,66  | 0,242796082 |
| Mpp2      | 0,08  | 0,94815841  | -0,02 | 0,972336944 | 0,09  | 0,921956183 | 0,81  | 0,06195481  | 0,1   | 0,898309858 |
| Mpp3      | -0,87 | 0,087910462 | -0,58 | 0,638790998 | 0,24  | 0,830517657 | 1,18  | 0,154588425 | 0,17  | 0,884640084 |
| Mpp4      | -0,01 | 0,995438679 | 0,29  | 0,688435265 | 0,01  | 0,987584135 | -0,06 | 0,931331425 | 0,44  | 0,341238778 |
| Mpp5      | 0,15  | 0,840909921 | 0,02  | 0,989873399 | 0,18  | 0,891175722 | 0,61  | 0,29432437  | -0,03 | 0,980945466 |
| Mpp6      | -0,02 | 0,98456417  | -0,52 | 0,482501854 | 0,03  | 0,988120354 | 1,6   | 0,08358638  | 0,84  | 0,421255613 |
| Mpp7      | 0     | 0,998769353 | -0,31 | 0,824927818 | 0,15  | 0,941561196 | -0,17 | 0,882243971 | 0,14  | 0,845218636 |
| Mppe1     | -0,06 | 0,96497803  | 0,01  | 0,997344247 | -0,29 | 0,832752216 | -0,24 | 0,775099008 | 0,15  | 0,891375716 |
| Mpped1    | -0,34 | 0,54401985  | -0,24 | 0,854906955 | 0,02  | 0,987563007 | -0,07 | 0,95852873  | -0,16 | 0,916173996 |
| Mpped2    | -0,12 | 0,892559851 | 0,04  | 0,967833514 | -0,24 | 0,779970041 | -2,62 | 0,003561179 | -0,33 | 0,664160042 |
| Mprip     | 0,08  | 0,898603809 | 0,04  | 0,95647337  | -0,41 | 0,458498879 | 0,04  | 0,929409776 | -0,34 | 0,505878125 |
| Mpst      | -0,14 | 0,824570803 | 0,43  | 0,601390176 | 0,05  | 0,973186233 | 0,18  | 0,807008095 | -0,25 | 0,767669883 |
| Mptx1     | 0,14  | 0,867692799 | 0,19  | 0,690701372 | -0,27 | 0,735273501 | -0,36 | 0,675160655 | -0,32 | 0,713218958 |
| Mptx2     | 0,45  | 0,316599006 | 0,27  | 0,643743213 | -0,26 | 0,746397133 | -0,52 | 0,361283798 | 0,11  | 0,881943508 |
| Mpv17     | 0,1   | 0,856984761 | 0,16  | 0,855632384 | -0,28 | 0,743604411 | -0,35 | 0,305080132 | 0,17  | 0,787304651 |
| Mpv171    | -0,15 | 0,928103232 | 0,43  | 0,635138707 | 0,21  | 0,885042765 | -1,36 | 0,044384367 | -0,3  | 0,689780577 |
| Mpv1712   | -0,18 | 0,65761852  | -0,19 | 0,632756037 | 0,2   | 0,843857287 | -0,03 | 0,963392781 | 0,06  | 0,949544475 |
| Mpz       | 0,04  | 0,975469067 | 0,27  | 0,801259805 | -0,35 | 0,432839442 | 0,24  | 0,510267658 | 0,11  | 0,877322592 |
| Mpzl1     | -0,4  | 0,335742135 | -0,32 | 0,415198475 | 0,52  | 0,157179435 | -0,21 | 0,520046332 | -0,37 | 0,419738281 |
| Mpzl2     | 0,28  | 0,72649108  | 0,75  | 0,323278688 | 0,85  | 0,109310669 | 0,32  | 0,447973475 | 0,68  | 0,136360162 |
| Mpzl3     | -0,29 | 0,849867944 | -0,72 | 0,747928263 | 0,41  | 0,721952929 | 0,28  | 0,867742716 | -1,13 | 0,368424749 |

|          |       |             |       |             |       |             |       |             |       |             |
|----------|-------|-------------|-------|-------------|-------|-------------|-------|-------------|-------|-------------|
| Mr1      | -0,28 | 0,744239126 | 0,49  | 0,557096406 | -0,56 | 0,46406504  | -0,71 | 0,18650736  | -0,06 | 0,948935854 |
| Mrap     | -0,05 | 0,964976202 | -0,58 | 0,47154257  | 0,25  | 0,732540375 | 0,01  | 0,99282298  | -0,24 | 0,82823489  |
| Mrap2    | -0,02 | 0,982432452 | 0,02  | 0,994730653 | 0,08  | 0,93262999  | 0,09  | 0,932364636 | 0,35  | 0,643319519 |
| Mras     | -0,3  | 0,692446087 | 0,07  | 0,94892312  | -0,36 | 0,594290097 | -1,14 | 0,216148738 | 0,5   | 0,659962586 |
| Mrc1     | 0,06  | 0,969257166 | -0,4  | 0,481105963 | 0,05  | 0,978012085 | 0,1   | 0,943864463 | 0,11  | 0,949751787 |
| Mrc2     | -0,27 | 0,607728251 | 0,02  | 0,991108041 | -0,11 | 0,888677583 | -0,4  | 0,501663445 | -0,19 | 0,789985499 |
| Mre11a   | -0,61 | 0,377250236 | 0,09  | 0,930192503 | 0,34  | 0,764615262 | 0,64  | 0,269348903 | 0,11  | 0,922086387 |
| Mreg     | -0,34 | 0,469692532 | 0,12  | 0,889334606 | -0,3  | 0,706842882 | -0,15 | 0,75983637  | -0,06 | 0,957046874 |
| Mrfap1   | -0,53 | 0,172698611 | -0,47 | 0,324289795 | 0,36  | 0,61190379  | 0,84  | 0,39058196  | -0,06 | 0,968130547 |
| Mrgbp    | -0,42 | 0,324770352 | -0,05 | 0,957659362 | 0,29  | 0,713620433 | 0,09  | 0,871321071 | 0,36  | 0,583279373 |
| Mrgpra1  | 0,51  | 0,234876482 | 0     | 0,999395995 | 0,26  | 0,722471938 | -0,37 | 0,389492505 | -0,1  | 0,938265452 |
| Mrgpra2a | -0,17 | 0,676668915 | -0,26 | 0,624712123 | -0,58 | 0,652428196 | 0,03  | 0,964377047 | -0,2  | 0,745574572 |
| Mrgpra2b | 0,32  | 0,455001921 | 0,55  | 0,723842223 | -0,33 | 0,671680785 | -0,28 | 0,764855242 | 0,68  | 0,266418831 |
| Mrgpra3  | 0,37  | 0,494679097 | -0,33 | 0,582478031 | -0,18 | 0,727554633 | 0,39  | 0,454429111 | -0,13 | 0,89529118  |
| Mrgpra4  | 0,39  | 0,577717338 | -0,17 | 0,785244931 | -0,42 | 0,63335587  | 0,03  | 0,971100918 | 0,19  | 0,830077903 |
| Mrgpra5  | -0,01 | 0,978853388 | -0,1  | 0,842145037 | -0,29 | 0,642696165 | 0,12  | 0,742581363 | 0,2   | 0,742982183 |
| Mrgpra6  | -0,24 | 0,689114497 | -0,31 | 0,528720196 | -0,19 | 0,778653031 | 0,09  | 0,853963723 | 0,27  | 0,652022884 |
| Mrgpra7  | 0,02  | 0,975341177 | 0,06  | 0,910595744 | -0,01 | 0,99129124  | 0     | 1           | -0,1  | 0,888252054 |
| Mrgpra8  | -0,05 | 0,947329154 | 0     | 1           | -0,05 | 0,938414    | -0,01 | 0,99148359  | -0,03 | 0,97206128  |
| Mrgpra9  | 0,16  | 0,810101389 | -0,17 | 0,859917649 | -0,13 | 0,847564027 | -0,04 | 0,962113083 | -0,17 | 0,857890348 |
| Mrgprb1  | -0,02 | 0,983516046 | 0,07  | 0,934294134 | -0,07 | 0,940335002 | -0,23 | 0,55864576  | -0,1  | 0,91314596  |
| Mrgprb13 | 0,02  | 0,978501161 | 0,09  | 0,851610126 | 0,09  | 0,873120562 | -0,02 | 0,970896654 | -0,02 | 0,980961333 |
| Mrgprb2  | 0,04  | 0,967983674 | -0,1  | 0,906267371 | -0,23 | 0,672766751 | -0,24 | 0,495005553 | -0,02 | 0,982325506 |
| Mrgprb3  | 0,06  | 0,902504843 | -0,03 | 0,954948291 | -0,08 | 0,904057901 | -0,11 | 0,767086207 | -0,12 | 0,862456985 |
| Mrgprb4  | 0,01  | 0,984124693 | 0,09  | 0,852461907 | -0,05 | 0,95204022  | -0,04 | 0,926898299 | -0,09 | 0,915395762 |
| Mrgprb5  | -0,07 | 0,911074343 | 0     | 1           | -0,1  | 0,857413978 | 0,25  | 0,48728376  | 0,17  | 0,77360786  |
| Mrgprb8  | 0,04  | 0,948362077 | 0,15  | 0,929692416 | -0,06 | 0,941627748 | -0,22 | 0,657996279 | -0,07 | 0,935554371 |
| Mrgprd   | 0,08  | 0,897614401 | -0,38 | 0,568304052 | -0,43 | 0,601741286 | 0,28  | 0,688800416 | -0,12 | 0,935732697 |
| Mrgpre   | -0,3  | 0,586753542 | -0,92 | 0,277253387 | 0,37  | 0,745799361 | -0,66 | 0,379067926 | -1,15 | 0,168781914 |
| Mrgprf   | 0,06  | 0,944652244 | -0,24 | 0,761013593 | -0,04 | 0,965775869 | -0,04 | 0,954979453 | 0,05  | 0,969117862 |
| Mrgprg   | 0,07  | 0,887517705 | -0,03 | 0,969481475 | -0,01 | 0,994838841 | -0,26 | 0,557215591 | -0,11 | 0,901602311 |
| Mrgprh   | 0,07  | 0,902351728 | 0,08  | 0,889242944 | -0,09 | 0,881461218 | -0,69 | 0,135252085 | -0,42 | 0,610076369 |
| Mrgprx1  | -0,03 | 0,961784154 | -0,27 | 0,738984063 | 0,09  | 0,926974012 | 0,03  | 0,967866794 | -0,13 | 0,840952901 |
| Mrgprx2  | -1,08 | 0,164698985 | 0,08  | 0,934602811 | 0,21  | 0,897233315 | 0,62  | 0,116103358 | 0,27  | 0,823098095 |
| Mri1     | -0,24 | 0,728739942 | 0,01  | 0,997674941 | 0,22  | 0,725191296 | 0,41  | 0,317487307 | -0,6  | 0,199957964 |

|        |       |             |       |             |       |             |       |             |       |             |
|--------|-------|-------------|-------|-------------|-------|-------------|-------|-------------|-------|-------------|
| Mrln   | -0,25 | 0,637333256 | -0,12 | 0,832841509 | -0,11 | 0,859411859 | 0,21  | 0,749306304 | 0,54  | 0,638868989 |
| Mrm1   | 0,07  | 0,937322949 | 0,34  | 0,62727163  | 0,16  | 0,818685699 | 0     | 0,998710655 | -0,19 | 0,847881266 |
| Mro    | -0,34 | 0,68423035  | 0,38  | 0,639419375 | 0,1   | 0,908018353 | 0,11  | 0,817921634 | 0,36  | 0,697757911 |
| Mroh1  | 0,34  | 0,559644874 | 0,89  | 0,087435995 | 0,01  | 0,987563007 | -0,31 | 0,522511755 | 0,24  | 0,728388857 |
| Mroh2a | 0,18  | 0,741182094 | -0,04 | 0,97636546  | 0,14  | 0,872313115 | 0,66  | 0,117584986 | 0,02  | 0,981677577 |
| Mroh2b | -0,08 | 0,951885977 | -0,25 | 0,722938629 | -0,08 | 0,926399742 | 0,06  | 0,941824319 | -0,03 | 0,977236465 |
| Mroh3  | 0,38  | 0,799359492 | -0,53 | 0,565603216 | 0,19  | 0,875486206 | -0,04 | 0,967405057 | -0,5  | 0,750470312 |
| Mroh4  | 0,51  | 0,359330075 | 0,38  | 0,735769407 | -0,44 | 0,374409711 | -0,38 | 0,749900724 | 0,07  | 0,970154126 |
| Mroh5  | -0,04 | 0,959443704 | -0,04 | 0,975765252 | 0,12  | 0,861877024 | 0,15  | 0,87613802  | 0,11  | 0,899797564 |
| Mroh6  | 0,08  | 0,928001641 | -0,43 | 0,699657918 | -0,17 | 0,791940256 | -0,23 | 0,852596465 | -0,61 | 0,604611676 |
| Mroh7  | 0,34  | 0,560461791 | -0,58 | 0,49125334  | -0,61 | 0,213356796 | 0,03  | 0,968371235 | 0,03  | 0,981509403 |
| Mroh8  | -0,09 | 0,932324918 | 0,19  | 0,692551431 | -0,41 | 0,501058575 | 0,08  | 0,87613802  | -0,35 | 0,521841588 |
| Mroh9  | 0,08  | 0,881663401 | 0,01  | 0,995205602 | -0,08 | 0,914354795 | 0,07  | 0,861730701 | -0,05 | 0,955654991 |
| Mrpl1  | 0,29  | 0,845342823 | 0,04  | 0,983807263 | -0,37 | 0,79692015  | 0,05  | 0,957596559 | 0,01  | 0,992370267 |
| Mrpl10 | 0,06  | 0,954349573 | -0,09 | 0,916042399 | 0,32  | 0,79407734  | 0,13  | 0,830616529 | -0,52 | 0,428613647 |
| Mrpl11 | -0,38 | 0,421957622 | -0,26 | 0,584760416 | -0,18 | 0,783326867 | 0,4   | 0,322564589 | -0,26 | 0,765327693 |
| Mrpl12 | -0,28 | 0,720132176 | -0,4  | 0,306324212 | 1,2   | 0,178604539 | 0,31  | 0,314061582 | -0,12 | 0,869113953 |
| Mrpl13 | 0,34  | 0,344087078 | 0,17  | 0,768164691 | -0,09 | 0,917694073 | 0,62  | 0,143860446 | 0,34  | 0,561876467 |
| Mrpl14 | 0,17  | 0,821773717 | -0,02 | 0,98859071  | 0,56  | 0,412477493 | 0,15  | 0,778212842 | -0,07 | 0,953297732 |
| Mrpl15 | -0,63 | 0,305893528 | -0,66 | 0,254708337 | 0,25  | 0,686061973 | 0,71  | 0,298836375 | -0,37 | 0,6754671   |
| Mrpl16 | -0,16 | 0,737487496 | -0,61 | 0,44609572  | 1,74  | 0,040591718 | 1,21  | 0,27098639  | 0,86  | 0,433201574 |
| Mrpl17 | -0,48 | 0,239601221 | -0,09 | 0,906267371 | 0,9   | 0,158982279 | 0,49  | 0,21307741  | 0     | 0,998277084 |
| Mrpl18 | -0,23 | 0,54401985  | -0,1  | 0,957845968 | 0,31  | 0,660394995 | 1,47  | 0,288784022 | 1     | 0,482429376 |
| Mrpl19 | -0,12 | 0,841140165 | -0,05 | 0,956555856 | 0,86  | 0,187270439 | 0,87  | 0,194507707 | -0,07 | 0,965798481 |
| Mrpl2  | -0,29 | 0,445856413 | -0,1  | 0,857490594 | 0,7   | 0,446493846 | 0,56  | 0,250065242 | 0,34  | 0,576337996 |
| Mrpl20 | -0,31 | 0,846313357 | -0,51 | 0,643102783 | 0,31  | 0,698451287 | 0,91  | 0,350906518 | 0,4   | 0,724669859 |
| Mrpl21 | 0,03  | 0,976870178 | -0,1  | 0,882847123 | 0,25  | 0,862480223 | 0,57  | 0,108495225 | 0,08  | 0,912250982 |
| Mrpl22 | -0,46 | 0,420942329 | -0,56 | 0,511278756 | 0,82  | 0,211561246 | 0,23  | 0,673534755 | -0,2  | 0,77959286  |
| Mrpl23 | 0,1   | 0,844688163 | -0,29 | 0,487477927 | 0,19  | 0,848684973 | 0,17  | 0,673173015 | -0,22 | 0,720742956 |
| Mrpl24 | -0,02 | 0,976574175 | 0,36  | 0,590585777 | 0,16  | 0,887782273 | -0,53 | 0,164734522 | 0,17  | 0,827532593 |
| Mrpl27 | 0,39  | 0,771984923 | 0,4   | 0,616459449 | 0,06  | 0,945107825 | -0,68 | 0,516478734 | -0,96 | 0,426902843 |
| Mrpl28 | -0,63 | 0,316599006 | -0,12 | 0,88928164  | 0,13  | 0,830336321 | 0,43  | 0,239185309 | -0,2  | 0,792404969 |
| Mrpl3  | -0,32 | 0,419180544 | -0,37 | 0,537510632 | 0,01  | 0,994700527 | 0,75  | 0,190359582 | -0,11 | 0,910507369 |
| Mrpl30 | 0,45  | 0,609062532 | -0,64 | 0,666285906 | 0,44  | 0,661089127 | 0,59  | 0,379728504 | 0,59  | 0,586518737 |
| Mrpl32 | 0,08  | 0,903817676 | -0,37 | 0,555811578 | 0,42  | 0,714808135 | 0,67  | 0,480936901 | 0,16  | 0,93367447  |



|         |       |             |       |             |       |             |       |             |       |             |
|---------|-------|-------------|-------|-------------|-------|-------------|-------|-------------|-------|-------------|
| Mrpl33  | 0,1   | 0,931456925 | 0,03  | 0,987867499 | 0,15  | 0,90486875  | -0,7  | 0,098415856 | -0,39 | 0,456564217 |
| Mrpl34  | -0,2  | 0,727387897 | -0,33 | 0,483436169 | 0,08  | 0,91560558  | 0,95  | 0,036338662 | -0,2  | 0,750764819 |
| Mrpl35  | -0,14 | 0,892020755 | -0,53 | 0,275457347 | 0,23  | 0,68845998  | 0,14  | 0,839333217 | -0,5  | 0,381486385 |
| Mrpl36  | -0,2  | 0,622541886 | -0,43 | 0,350749298 | 0,11  | 0,911634383 | 0,69  | 0,19169965  | -0,11 | 0,91404265  |
| Mrpl37  | -0,16 | 0,796629483 | -0,17 | 0,857503073 | 0,33  | 0,622570351 | 0,79  | 0,134636808 | 0,22  | 0,773125975 |
| Mrpl38  | -0,02 | 0,98225675  | -0,21 | 0,664710351 | -0,13 | 0,864004194 | 0,48  | 0,16642217  | 0,35  | 0,497752039 |
| Mrpl39  | -0,05 | 0,939237777 | -0,1  | 0,883145635 | 0,15  | 0,906709737 | 0,36  | 0,282769221 | -0,06 | 0,940092696 |
| Mrpl4   | -0,15 | 0,816143427 | -0,13 | 0,867265251 | 0,25  | 0,809137779 | -0,31 | 0,496598311 | -0,1  | 0,912733818 |
| Mrpl40  | 0,19  | 0,754969448 | -0,34 | 0,478648061 | 0,07  | 0,932577939 | 0,12  | 0,80733482  | -0,3  | 0,600537288 |
| Mrpl41  | -0,21 | 0,777335496 | 0,18  | 0,710843986 | 0,23  | 0,79007666  | 0,2   | 0,596378369 | 0,08  | 0,928724353 |
| Mrpl42  | -0,06 | 0,932531737 | -0,41 | 0,573232957 | 0,26  | 0,679406979 | 0,6   | 0,258540102 | -0,24 | 0,697226565 |
| Mrpl43  | -0,14 | 0,803737003 | -0,1  | 0,898238238 | -0,05 | 0,967767582 | 0,63  | 0,364026081 | -0,15 | 0,84970727  |
| Mrpl44  | 0,17  | 0,790580834 | -0,18 | 0,878885226 | -0,28 | 0,557290334 | -0,36 | 0,598849431 | -0,23 | 0,719285827 |
| Mrpl45  | -0,22 | 0,705404186 | 0     | 1           | -0,11 | 0,943069255 | 0,83  | 0,076374184 | 0,17  | 0,890039506 |
| Mrpl46  | -0,17 | 0,718059583 | -0,55 | 0,318079221 | 0,36  | 0,597190829 | 1,04  | 0,118739789 | 0,14  | 0,9162287   |
| Mrpl47  | -0,02 | 0,973545171 | -0,24 | 0,772558681 | 0,66  | 0,469791235 | 0,43  | 0,260469267 | -0,21 | 0,817910544 |
| Mrpl48  | -0,09 | 0,882119027 | -0,1  | 0,901688898 | -0,1  | 0,911634383 | 0,1   | 0,902609947 | 0,08  | 0,954004872 |
| Mrpl49  | -0,2  | 0,763907846 | -0,54 | 0,244905942 | 0,59  | 0,272265355 | 0,3   | 0,758877911 | -0,08 | 0,959573673 |
| Mrpl50  | -0,7  | 0,291011995 | -0,36 | 0,517288934 | 0,99  | 0,144099096 | 0,62  | 0,161137645 | -0,39 | 0,479560208 |
| Mrpl51  | -0,75 | 0,561405935 | -0,26 | 0,786394409 | -0,13 | 0,916477664 | 0,15  | 0,778212842 | 0,47  | 0,338315706 |
| Mrpl52  | 0,05  | 0,928302089 | -0,35 | 0,594415097 | 0,34  | 0,526108769 | 1,84  | 0,020826949 | 0,15  | 0,847312006 |
| Mrpl53  | -0,02 | 0,972701787 | -0,17 | 0,680709276 | 0,56  | 0,370554673 | 0,28  | 0,48341999  | 0,03  | 0,973576804 |
| Mrpl54  | 0,16  | 0,734390199 | 0     | 0,999210601 | -0,27 | 0,642542263 | 0,97  | 0,0456902   | 0,31  | 0,545532754 |
| Mrpl55  | 0,06  | 0,902911274 | -0,11 | 0,805135188 | 0,33  | 0,546286708 | 0,01  | 0,991962381 | -0,33 | 0,587735967 |
| Mrpl57  | -0,22 | 0,666546952 | -0,06 | 0,938088718 | 0,17  | 0,812264294 | 0,37  | 0,552731038 | -0,04 | 0,97206128  |
| Mrpl9   | -0,31 | 0,593540946 | -0,28 | 0,734207194 | 0,11  | 0,916362962 | -0,06 | 0,9274274   | 0,76  | 0,175438421 |
| Mrps10  | 0,12  | 0,932671813 | -0,08 | 0,881113709 | 0,41  | 0,694941328 | 0,27  | 0,800534461 | 0,22  | 0,881943508 |
| Mrps11  | -0,16 | 0,841140165 | -0,07 | 0,926178529 | 0,46  | 0,501760272 | 0,6   | 0,280843942 | -0,13 | 0,905842374 |
| Mrps12  | -0,07 | 0,891211525 | -0,18 | 0,688435265 | 0,05  | 0,961776439 | 0,45  | 0,35953164  | 0,24  | 0,733488478 |
| Mrps14  | -0,55 | 0,316599006 | -0,21 | 0,935041212 | -0,18 | 0,906678445 | -0,6  | 0,437033713 | -1,08 | 0,373699539 |
| Mrps15  | -0,03 | 0,964951393 | -0,23 | 0,748874675 | -0,18 | 0,859517858 | 0,42  | 0,51910108  | -0,03 | 0,983768072 |
| Mrps16  | 0,05  | 0,94815841  | -0,38 | 0,612645853 | 0,16  | 0,837003818 | 0,62  | 0,311276982 | 0,12  | 0,917347603 |
| Mrps17  | -0,37 | 0,407600798 | -0,24 | 0,657429109 | 0,23  | 0,698662367 | 0,53  | 0,168143396 | -0,41 | 0,55605211  |
| Mrps18a | 0,39  | 0,367747087 | -0,22 | 0,623157194 | 0,7   | 0,298529141 | 0,21  | 0,581949869 | 0,16  | 0,799495162 |
| Mrps18b | -0,41 | 0,689253784 | -0,4  | 0,793842674 | 1,54  | 0,0489251   | 1,07  | 0,080138624 | 0,37  | 0,766973879 |

|         |       |             |       |             |       |             |       |             |       |             |
|---------|-------|-------------|-------|-------------|-------|-------------|-------|-------------|-------|-------------|
| Mrps18c | -0,27 | 0,699906083 | -0,34 | 0,594415097 | -0,05 | 0,963199274 | -0,43 | 0,434837088 | -0,6  | 0,568949282 |
| Mrps2   | -0,7  | 0,576406658 | 0,19  | 0,825210924 | 0,22  | 0,887998113 | 0,28  | 0,484166794 | 0,03  | 0,979456872 |
| Mrps21  | 0,07  | 0,926316023 | -0,04 | 0,974223336 | -0,16 | 0,915713144 | 0,4   | 0,48263084  | -0,33 | 0,638780444 |
| Mrps22  | -0,32 | 0,629977221 | -0,48 | 0,467853942 | 0,34  | 0,622946887 | 0,53  | 0,385078342 | -0,17 | 0,842953523 |
| Mrps23  | 0,01  | 0,995778597 | -0,05 | 0,956351306 | -0,11 | 0,933080127 | 0,72  | 0,191828434 | -0,08 | 0,948163009 |
| Mrps24  | -0,02 | 0,984183715 | -0,05 | 0,918694468 | -0,01 | 0,995401448 | -0,1  | 0,83420397  | -0,18 | 0,792346596 |
| Mrps25  | -0,19 | 0,821267687 | -0,06 | 0,935984823 | 0,6   | 0,387068715 | -0,13 | 0,700603284 | -0,11 | 0,868167014 |
| Mrps26  | -0,05 | 0,960052101 | -0,18 | 0,722766419 | 0,36  | 0,547440473 | 0,24  | 0,421316851 | 0,46  | 0,356559162 |
| Mrps27  | -0,38 | 0,669456348 | -0,31 | 0,729172466 | 0,5   | 0,583734191 | 0,89  | 0,175551966 | 0,02  | 0,990633766 |
| Mrps28  | -0,52 | 0,260634235 | -0,24 | 0,789051952 | 0,73  | 0,13589176  | 1,18  | 0,05133893  | -0,01 | 0,987018072 |
| Mrps30  | 0,21  | 0,663447662 | -0,13 | 0,903595287 | 0,38  | 0,736935123 | 0,74  | 0,159163116 | -0,01 | 0,991480325 |
| Mrps31  | -0,96 | 0,181600158 | -0,16 | 0,904698551 | -0,11 | 0,941627748 | -0,24 | 0,742106348 | -0,21 | 0,750470312 |
| Mrps33  | -0,29 | 0,657124524 | -0,12 | 0,836605146 | 0,18  | 0,769390181 | 0,31  | 0,699241026 | 0,1   | 0,925171662 |
| Mrps34  | -0,01 | 0,98600909  | -0,09 | 0,894640653 | 0,03  | 0,970992385 | 0,61  | 0,22823617  | 0,52  | 0,305995061 |
| Mrps35  | -0,21 | 0,774822327 | -0,32 | 0,419795665 | 0,13  | 0,876412565 | 0,26  | 0,560748627 | 0,1   | 0,91398047  |
| Mrps36  | 0     | 0,998210173 | -0,06 | 0,965413567 | -0,09 | 0,955761087 | 0,16  | 0,909873635 | 0,12  | 0,94250983  |
| Mrps5   | -0,05 | 0,955200574 | -0,3  | 0,753472848 | 0,17  | 0,839096359 | 0,4   | 0,698362346 | 0,06  | 0,97206128  |
| Mrps6   | -0,08 | 0,903817676 | -0,04 | 0,943915456 | 0,29  | 0,725191296 | -0,33 | 0,347503588 | 0,71  | 0,311906172 |
| Mrps7   | 0,38  | 0,574566941 | 0,38  | 0,583764309 | -0,06 | 0,947881687 | -0,16 | 0,872394965 | -0,48 | 0,556757903 |
| Mrps9   | -0,07 | 0,943079514 | 0,04  | 0,938233008 | 0,19  | 0,846975965 | 0,69  | 0,073275563 | 0,21  | 0,799898945 |
| Mrrf    | 0,01  | 0,995658455 | 0,04  | 0,947107147 | -0,21 | 0,88539334  | 0,42  | 0,235630129 | 0,47  | 0,498803884 |
| Mrs2    | -0,2  | 0,642385552 | -0,34 | 0,640836969 | 0,33  | 0,670926345 | 0,14  | 0,808019987 | -0,25 | 0,766559546 |
| Mrto4   | -0,62 | 0,420942329 | -0,39 | 0,490785061 | 0,57  | 0,324321658 | 0,58  | 0,284123923 | -0,33 | 0,713101025 |
| Mrvi1   | -0,45 | 0,407083382 | -0,13 | 0,86297915  | 0,3   | 0,667006799 | -0,33 | 0,539425652 | -0,04 | 0,969937563 |
| Ms4a1   | 0,09  | 0,91048699  | 0     | 0,998513452 | -0,02 | 0,97548193  | -0,03 | 0,96939036  | -0,15 | 0,825871709 |
| Ms4a10  | 0,24  | 0,78851504  | 0,27  | 0,689924866 | -0,22 | 0,777810365 | -0,08 | 0,904690757 | -0,19 | 0,801385411 |
| Ms4a12  | -0,14 | 0,824044892 | -0,08 | 0,892916262 | -0,09 | 0,907737987 | 0,26  | 0,529804709 | 0,04  | 0,969994712 |
| Ms4a13  | 0,21  | 0,5976608   | -0,04 | 0,980518468 | -0,27 | 0,660517013 | 0     | 0,997771107 | -0,01 | 0,991437885 |
| Ms4a14  | 0,11  | 0,840909921 | 0,12  | 0,819025327 | 0,24  | 0,616978696 | -0,02 | 0,977608888 | 0,24  | 0,766252538 |
| Ms4a15  | -0,11 | 0,923180948 | 0,62  | 0,373555617 | -0,24 | 0,744387748 | -0,34 | 0,525803558 | -0,13 | 0,86809582  |
| Ms4a18  | 0,08  | 0,928944712 | -0,05 | 0,930192503 | 0,1   | 0,901032944 | 0,35  | 0,376628904 | 0,36  | 0,628127128 |
| Ms4a2   | 0,59  | 0,276023058 | 0,15  | 0,831580851 | -0,41 | 0,689847701 | -0,07 | 0,92328164  | 0,09  | 0,932268703 |
| Ms4a3   | 0,14  | 0,764824121 | 0,29  | 0,608587988 | -0,36 | 0,669926849 | -0,2  | 0,663875303 | -0,22 | 0,766069824 |
| Ms4a4a  | 0,02  | 0,973458531 | 0,51  | 0,411059412 | 0,22  | 0,853888307 | 0,06  | 0,9324626   | 0,42  | 0,484862172 |
| Ms4a4b  | 0,16  | 0,850491134 | 0,1   | 0,917223247 | -0,24 | 0,774812688 | -0,11 | 0,871925977 | 0,04  | 0,960175192 |

|         |       |             |       |             |       |             |       |             |       |             |
|---------|-------|-------------|-------|-------------|-------|-------------|-------|-------------|-------|-------------|
| Ms4a4c  | 0,77  | 0,579444251 | 0,53  | 0,471247707 | -0,28 | 0,675674124 | -0,02 | 0,970874394 | 0,43  | 0,626176831 |
| Ms4a4d  | 1,11  | 0,552683939 | 2,41  | 0,066139582 | -3,5  | 0,001562495 | -1,1  | 0,37252791  | 1,97  | 0,091622087 |
| Ms4a5   | 0,12  | 0,892062603 | 0,08  | 0,900801202 | -0,27 | 0,757498725 | 0,05  | 0,949578813 | -0,13 | 0,884248437 |
| Ms4a6b  | 1,47  | 0,249614815 | 1,66  | 0,306045228 | -1,73 | 0,15569544  | 0,19  | 0,943864463 | 2     | 0,198883002 |
| Ms4a6c  | 0,08  | 0,92234217  | -0,68 | 0,302028989 | -0,45 | 0,626338135 | 0,77  | 0,094014104 | 0,52  | 0,583894721 |
| Ms4a6d  | 0,44  | 0,600313897 | 0,17  | 0,705747563 | -1,15 | 0,250186067 | 2,98  | 0,031401896 | 1,18  | 0,298911125 |
| Ms4a7   | 0,72  | 0,279793863 | -0,71 | 0,615288453 | 0,45  | 0,669548016 | 0,86  | 0,434090016 | -0,7  | 0,597701201 |
| Ms4a8a  | 0,15  | 0,774947661 | -0,13 | 0,94248518  | 0,6   | 0,435715758 | -0,02 | 0,985865561 | 0,09  | 0,958856121 |
| Msantd1 | 0,12  | 0,839203781 | 0,46  | 0,667097376 | -0,46 | 0,465936592 | 0,14  | 0,769037161 | 0,33  | 0,603823701 |
| Msantd2 | -0,97 | 0,100798028 | -0,41 | 0,684726882 | 0,49  | 0,541688853 | 0,18  | 0,716994919 | -0,17 | 0,851180406 |
| Msantd3 | 0,42  | 0,701086418 | 0,32  | 0,5291312   | 0,09  | 0,914134206 | 1,16  | 0,04232117  | -0,11 | 0,865258929 |
| Msantd4 | 0,07  | 0,945267986 | 0,1   | 0,866281408 | 0,2   | 0,806102885 | -0,05 | 0,932289307 | 0,14  | 0,865258929 |
| Msc     | -0,04 | 0,970463755 | 0,13  | 0,900801202 | -0,22 | 0,846975965 | 0,02  | 0,975655831 | -0,23 | 0,728207329 |
| Msgn1   | -0,17 | 0,66331039  | -0,21 | 0,662814888 | 0,17  | 0,748973263 | 0,16  | 0,677265557 | 0,12  | 0,860591136 |
| Msh2    | 0,11  | 0,897717279 | -0,03 | 0,986226562 | 0,7   | 0,215429632 | 0,31  | 0,647052373 | -0,34 | 0,712968816 |
| Msh3    | 0,05  | 0,971590029 | 0     | 0,999395995 | 0,28  | 0,795402592 | 0,96  | 0,353547948 | 0,25  | 0,86229485  |
| Msh4    | -0,11 | 0,89763852  | -0,36 | 0,568187167 | -0,68 | 0,341801407 | 0,1   | 0,880590198 | -0,38 | 0,619416028 |
| Msh5    | 0,64  | 0,31190427  | 0,47  | 0,450177784 | -0,12 | 0,931510936 | -0,62 | 0,451614744 | 0,03  | 0,982541424 |
| Msh6    | -0,3  | 0,523296087 | -0,03 | 0,972706967 | 0,87  | 0,299010171 | 0,64  | 0,232146833 | 0,3   | 0,702558142 |
| Msi1    | 0,11  | 0,897512359 | -0,21 | 0,668737729 | 0,32  | 0,570755021 | 0,18  | 0,676565379 | 0,16  | 0,874717264 |
| Msi2    | 0,13  | 0,829889828 | 0,12  | 0,88319997  | -0,15 | 0,791504463 | -1,68 | 0,023392296 | -0,41 | 0,494597478 |
| Msl1    | 0,21  | 0,820785667 | 0,21  | 0,764886087 | 0,42  | 0,380301578 | -0,04 | 0,970425932 | -0,28 | 0,751268314 |
| Msl2    | 0,12  | 0,91419205  | 0,52  | 0,275854898 | -0,3  | 0,777918093 | -0,51 | 0,167552848 | 0,31  | 0,579869722 |
| Msl3    | -0,14 | 0,825389612 | 0,14  | 0,766425161 | 0,21  | 0,773646012 | -0,23 | 0,716994919 | -0,29 | 0,70401038  |
| Msl3l2  | -0,29 | 0,529960893 | -0,19 | 0,834508568 | -0,06 | 0,971668287 | -0,48 | 0,571135056 | 0,1   | 0,953297732 |
| Msln    | -0,15 | 0,882760071 | 0,24  | 0,735554037 | 1,24  | 0,024794626 | -0,22 | 0,62427673  | -0,21 | 0,751494143 |
| Mslnl   | 0,37  | 0,359305883 | -0,16 | 0,843162191 | -0,22 | 0,671012215 | -0,13 | 0,862217405 | -0,12 | 0,89630096  |
| Msemb   | -0,2  | 0,823117065 | -0,3  | 0,730075625 | 0,33  | 0,551459304 | 0,43  | 0,404009989 | -0,05 | 0,956610289 |
| Msmo1   | -0,4  | 0,423859346 | 0,13  | 0,894571363 | 0,82  | 0,224747376 | -0,14 | 0,799835488 | 0,25  | 0,731865047 |
| Msmpl   | -0,15 | 0,873680744 | -0,54 | 0,466496532 | 0,39  | 0,735273501 | -1,34 | 0,08326794  | -1,11 | 0,093773281 |
| Msn     | -0,34 | 0,33035352  | 0,03  | 0,965039248 | 0,11  | 0,846689137 | 0,64  | 0,079240421 | 0,36  | 0,456032214 |
| Msr1    | 0,18  | 0,766898048 | -0,31 | 0,765325717 | -0,02 | 0,987105003 | 0,26  | 0,747946366 | -0,04 | 0,975441362 |
| Msra    | 0,02  | 0,993728727 | -0,47 | 0,816543137 | -0,3  | 0,661089127 | 0,44  | 0,40410107  | 0,26  | 0,699060093 |
| Msrbl   | -0,19 | 0,856984761 | -0,06 | 0,934592657 | 0,85  | 0,231640032 | 0,63  | 0,178006934 | -0,41 | 0,553650211 |
| Msrbl2  | -0,67 | 0,302609278 | -0,65 | 0,351449781 | 0,26  | 0,696594185 | -0,19 | 0,875280542 | -1,01 | 0,327246128 |

|         |       |             |       |             |       |             |       |             |       |             |
|---------|-------|-------------|-------|-------------|-------|-------------|-------|-------------|-------|-------------|
| Msrb3   | -0,31 | 0,633989663 | 0,31  | 0,644040783 | -0,4  | 0,628048897 | 0,18  | 0,750956508 | 0,54  | 0,471919432 |
| Mss51   | 0,76  | 0,214430522 | -0,21 | 0,786124404 | -0,29 | 0,8290371   | -0,34 | 0,726529864 | 0,19  | 0,900126162 |
| Mst1    | -0,07 | 0,928816764 | -0,06 | 0,935329426 | 0,23  | 0,820243663 | -0,13 | 0,794165367 | -0,02 | 0,980945466 |
| Mst1r   | 0,16  | 0,754298754 | -0,11 | 0,849099971 | 0,31  | 0,474169312 | 0,06  | 0,89361444  | 0,09  | 0,917388463 |
| Mstn    | -0,08 | 0,93534828  | 0,39  | 0,483436169 | -0,12 | 0,888921789 | 0,31  | 0,652447634 | 0,35  | 0,745134899 |
| Msto1   | -0,82 | 0,124654295 | -0,15 | 0,823246376 | 0,02  | 0,990836784 | 0,47  | 0,254212331 | -0,35 | 0,594534591 |
| Msx1    | -0,18 | 0,701627731 | 0,31  | 0,560357477 | -0,23 | 0,68947537  | -0,7  | 0,06054789  | 0,05  | 0,947437555 |
| Msx1os  | 0,01  | 0,991151585 | -0,07 | 0,89647435  | -0,17 | 0,729031049 | -0,01 | 0,983166423 | -0,01 | 0,987948597 |
| Msx2    | 0,17  | 0,78187924  | -0,28 | 0,693906911 | -0,71 | 0,081005692 | 0,3   | 0,726040578 | -0,22 | 0,863496792 |
| Msx3    | -0,04 | 0,953269094 | -0,11 | 0,928134372 | 0,15  | 0,78130791  | 0,15  | 0,671348066 | 0,36  | 0,511962622 |
| Mszf78  | 0,18  | 0,647841253 | 0,05  | 0,926157704 | -0,1  | 0,875486206 | -0,29 | 0,452506761 | -0,11 | 0,876747929 |
| Mszf81  | -0,05 | 0,914300986 | 0,04  | 0,935329426 | 0,08  | 0,909975745 | 0,01  | 0,992906132 | 0,05  | 0,948163009 |
| Mt1     | 1,16  | 0,214139353 | 0,79  | 0,295775341 | 0,47  | 0,682309944 | -1,47 | 0,141873176 | -0,02 | 0,988334908 |
| Mt2     | 0,79  | 0,343763562 | 0,59  | 0,3679706   | -0,33 | 0,628142669 | -1,39 | 0,028596815 | 0,02  | 0,983617617 |
| Mt3     | 0,43  | 0,772859736 | 0,23  | 0,707790154 | -0,36 | 0,676418104 | -0,56 | 0,311539415 | -0,1  | 0,949398086 |
| Mt4     | 0,19  | 0,698332739 | -0,53 | 0,426168855 | 0,29  | 0,580049353 | 0,01  | 0,981203009 | -0,17 | 0,838957343 |
| Mta1    | -0,08 | 0,886741208 | -0,18 | 0,702154437 | -0,16 | 0,888956864 | 0,11  | 0,814592176 | -0,53 | 0,336767175 |
| Mta2    | -0,63 | 0,197271952 | -0,07 | 0,882931058 | 0,41  | 0,36121902  | 0,21  | 0,498372058 | -0,34 | 0,497190175 |
| Mta3    | -0,2  | 0,666546952 | -0,31 | 0,655607331 | 0,35  | 0,705915392 | 0,71  | 0,094905894 | -0,42 | 0,596846983 |
| Mtag2   | -0,13 | 0,841584453 | 0,08  | 0,892869412 | 0,29  | 0,79678698  | -0,23 | 0,517354168 | 0,05  | 0,975441362 |
| Mtap    | -0,69 | 0,301911736 | -0,61 | 0,488525923 | 0,51  | 0,501826628 | 1,2   | 0,094014104 | 0,33  | 0,695702232 |
| Mtap7d3 | -0,02 | 0,981889402 | -0,58 | 0,470454944 | 0,15  | 0,804362908 | 0,6   | 0,406029112 | 0,15  | 0,907798813 |
| Mtbp    | -1,27 | 0,179001759 | -0,78 | 0,519915586 | 0,86  | 0,473499244 | 0,56  | 0,494062739 | -0,21 | 0,792305774 |
| Mtch1   | -0,61 | 0,222262142 | -0,52 | 0,678357594 | 0,16  | 0,87140695  | -0,09 | 0,921929178 | -0,81 | 0,117679228 |
| Mtch2   | 0,05  | 0,941126856 | 0     | 1           | 0,29  | 0,772782651 | 0,65  | 0,216113282 | 0,39  | 0,536026345 |
| Mtcl1   | 0,05  | 0,936194979 | -0,36 | 0,595287483 | 0,51  | 0,469558664 | 0,32  | 0,630104458 | 0,05  | 0,964198589 |
| Mtcp1   | 0,92  | 0,401159049 | 1,03  | 0,510694367 | 0,09  | 0,978012085 | -1,6  | 0,25949989  | 1,55  | 0,102038175 |
| Mtdh    | 0,16  | 0,706208727 | 0,4   | 0,341246774 | -0,02 | 0,987504853 | 0,13  | 0,81312304  | 0,52  | 0,329248978 |
| Mterf1a | 0,35  | 0,62872508  | 0,21  | 0,817110093 | -0,28 | 0,599364835 | -0,33 | 0,46809054  | -0,14 | 0,91339829  |
| Mterf1b | 0,39  | 0,597297093 | -0,02 | 0,998513452 | -0,39 | 0,783326867 | -0,75 | 0,484534044 | -0,78 | 0,597080822 |
| Mterf2  | 0,17  | 0,908516629 | -0,04 | 0,980199592 | 0,33  | 0,791940256 | -0,43 | 0,72503205  | -0,74 | 0,547497757 |
| Mterf3  | -0,24 | 0,897717279 | -0,09 | 0,95054492  | 0,73  | 0,359756591 | 0,05  | 0,963221464 | 0,76  | 0,306967333 |
| Mterf4  | 0,48  | 0,421957622 | 0,19  | 0,690701372 | -0,06 | 0,963357998 | -0,05 | 0,9540749   | -0,29 | 0,72846861  |
| Mtf1    | 0,51  | 0,429645338 | 0,51  | 0,49252156  | -0,13 | 0,886832708 | 0,06  | 0,928002892 | -0,38 | 0,574578145 |
| Mtf2    | -0,11 | 0,92069393  | -0,04 | 0,9537937   | 0,21  | 0,830336321 | -0,16 | 0,686514009 | -0,1  | 0,885673683 |

|         |       |             |       |             |       |             |       |             |       |             |
|---------|-------|-------------|-------|-------------|-------|-------------|-------|-------------|-------|-------------|
| Mtfmt   | -0,35 | 0,593540946 | -0,01 | 0,997935558 | 0,41  | 0,600679499 | 0,44  | 0,547475705 | 0,08  | 0,961642558 |
| Mtfp1   | -0,22 | 0,819658619 | -0,5  | 0,298168653 | 0,12  | 0,849697489 | 0,27  | 0,48843089  | -0,1  | 0,891925115 |
| Mtfr1   | -0,12 | 0,867025523 | -0,64 | 0,360136287 | 0,3   | 0,622946887 | 0,83  | 0,08326406  | -0,17 | 0,81954505  |
| Mtfr1l  | -0,01 | 0,992748202 | 0     | 1           | 0,62  | 0,475398917 | -0,16 | 0,763621113 | -0,58 | 0,387681311 |
| Mtfr2   | -0,37 | 0,707502054 | 0,02  | 0,990380046 | 0,55  | 0,56948206  | 0,99  | 0,331328372 | -0,4  | 0,732760874 |
| Mtg1    | -0,25 | 0,586458491 | 0,09  | 0,924525687 | -0,05 | 0,977897176 | 0,14  | 0,854971757 | -0,36 | 0,735152891 |
| Mtg2    | 0,03  | 0,983663467 | -0,15 | 0,856287448 | 0,04  | 0,967930981 | -0,26 | 0,688152796 | 0,02  | 0,990091016 |
| Mthfd1  | -1,17 | 0,074890017 | -0,61 | 0,477839426 | 1,12  | 0,239963458 | 1,14  | 0,078988145 | -0,07 | 0,928775639 |
| Mthfd1l | -0,67 | 0,269151748 | -0,38 | 0,701175891 | 0,28  | 0,715497532 | 1,17  | 0,043613742 | -0,18 | 0,864292286 |
| Mthfd2  | 1,15  | 0,153824107 | 0,66  | 0,577539302 | -1,05 | 0,043735621 | 1,34  | 0,072257087 | 2,73  | 0,000816221 |
| Mthfd2l | -0,09 | 0,924502628 | -0,53 | 0,559577499 | 1,75  | 0,013149311 | 0,06  | 0,914017103 | 0,06  | 0,956823512 |
| Mthfr   | -0,17 | 0,698332739 | 0,39  | 0,603282748 | -0,37 | 0,516254562 | 0,03  | 0,971100918 | 0,08  | 0,936653438 |
| Mthfsd  | 0,14  | 0,833275012 | -0,46 | 0,250735834 | 0,06  | 0,950862176 | 0,58  | 0,159991053 | -0,3  | 0,59741971  |
| Mthfsl  | -0,13 | 0,758636946 | -0,41 | 0,437942228 | 0,69  | 0,432229079 | 0,28  | 0,536344767 | -0,78 | 0,253125485 |
| Mtif2   | -0,23 | 0,794604997 | 0,13  | 0,808428528 | 0,47  | 0,576775067 | 0,19  | 0,616285736 | 0,43  | 0,386990613 |
| Mtif3   | -0,53 | 0,517149278 | 0,1   | 0,926353869 | -0,65 | 0,37970041  | -1,21 | 0,016126898 | -0,5  | 0,47756273  |
| Mtl5    | -0,18 | 0,681589242 | 0,26  | 0,664787536 | 0,25  | 0,610632059 | -0,18 | 0,776606838 | -0,14 | 0,918797466 |
| Mtm1    | -0,41 | 0,619127292 | -0,26 | 0,74027013  | 0,01  | 0,997220401 | 0,87  | 0,463497874 | 0,44  | 0,75910997  |
| Mtmr1   | -0,82 | 0,180356049 | 0,43  | 0,806456132 | -0,14 | 0,941627748 | 0,58  | 0,421989207 | 0,58  | 0,586214748 |
| Mtmr10  | -0,22 | 0,803761785 | -0,15 | 0,913253987 | -0,36 | 0,562334029 | -0,1  | 0,849242587 | -0,37 | 0,722834592 |
| Mtmr11  | -0,39 | 0,656726345 | 0,24  | 0,837480636 | 0,14  | 0,917694073 | 0,67  | 0,396686377 | 0,29  | 0,723591535 |
| Mtmr12  | -0,38 | 0,319925488 | -0,16 | 0,813423328 | 0,22  | 0,684883663 | -0,17 | 0,60405842  | -0,86 | 0,05100134  |
| Mtmr14  | 0,45  | 0,312439966 | 0,69  | 0,492893939 | 0,13  | 0,909371204 | 0,41  | 0,572854044 | -0,02 | 0,984632256 |
| Mtmr2   | 0,02  | 0,96781605  | 0,02  | 0,99149407  | -0,55 | 0,309053396 | -0,18 | 0,705916431 | 0,31  | 0,583882299 |
| Mtmr3   | -0,79 | 0,541417213 | 0,52  | 0,612645853 | -0,37 | 0,850868333 | -0,52 | 0,169406164 | 0,34  | 0,669861917 |
| Mtmr4   | -0,22 | 0,617280733 | 0,12  | 0,89354022  | 0,04  | 0,968874924 | -0,56 | 0,437635562 | 0,23  | 0,823098095 |
| Mtmr6   | -0,03 | 0,966775766 | 0,27  | 0,658349899 | 0,19  | 0,80210446  | -0,48 | 0,332144678 | 0,29  | 0,598277181 |
| Mtmr7   | -0,25 | 0,645559207 | 0,48  | 0,457994283 | -0,49 | 0,544583457 | -0,31 | 0,685226398 | 0,16  | 0,876927228 |
| Mtmr9   | -0,16 | 0,792313188 | -0,19 | 0,786394409 | -0,26 | 0,807786405 | 0,32  | 0,759381911 | 0,12  | 0,927517199 |
| Mtnr1a  | 0,04  | 0,970875252 | -0,32 | 0,401563956 | 0,04  | 0,956947968 | -0,06 | 0,921036173 | -0,26 | 0,829928829 |
| Mtnr1b  | 0,08  | 0,869565514 | 0     | 0,997935558 | 0,18  | 0,790538695 | 0,07  | 0,860201004 | 0,37  | 0,478324516 |
| Mto1    | -0,4  | 0,579444251 | -0,37 | 0,494858163 | 0,39  | 0,73635252  | -0,08 | 0,945619692 | -0,36 | 0,735622087 |
| Mtor    | -0,37 | 0,321600657 | -0,29 | 0,677000136 | 0,57  | 0,333898672 | 0,22  | 0,666504075 | -0,21 | 0,765342998 |
| Mtpap   | -0,03 | 0,959218841 | -0,12 | 0,863912115 | -0,14 | 0,899806076 | 0,25  | 0,55067293  | 0,41  | 0,456658287 |
| Mtpn    | -0,14 | 0,764288636 | -0,12 | 0,776548278 | 0,16  | 0,818494503 | 0,97  | 0,037611998 | 0,25  | 0,676132909 |

|         |       |             |       |             |       |             |       |             |       |             |
|---------|-------|-------------|-------|-------------|-------|-------------|-------|-------------|-------|-------------|
| Mtr     | -0,36 | 0,626714287 | -0,35 | 0,630975718 | 0,34  | 0,757401691 | 1,1   | 0,165567352 | -0,12 | 0,918959702 |
| Mtrf1   | -0,62 | 0,178589155 | -0,34 | 0,80678645  | -0,51 | 0,330054927 | 0,11  | 0,946232807 | -0,47 | 0,822999614 |
| Mtrf1l  | -0,3  | 0,731173847 | -0,17 | 0,894167102 | -0,72 | 0,434697086 | -0,54 | 0,378796733 | 0,02  | 0,985831064 |
| Mtrr    | -0,11 | 0,931976704 | 0,52  | 0,656204868 | 0,34  | 0,74662944  | 0,16  | 0,931477012 | 0,08  | 0,974374062 |
| Mtss1   | -0,4  | 0,576879913 | -0,51 | 0,437548809 | 0,68  | 0,321761132 | -1,12 | 0,060016564 | -0,53 | 0,344052279 |
| Mtss1l  | -0,98 | 0,124654295 | -1,02 | 0,377007015 | 0,45  | 0,530318769 | -1,85 | 0,029446142 | -1,33 | 0,03817864  |
| Mttp    | -0,15 | 0,80226019  | 0,22  | 0,655607331 | 0,33  | 0,599585318 | -0,37 | 0,708945614 | -0,15 | 0,916173996 |
| Mturn   | 0,01  | 0,990894139 | 0,75  | 0,59780175  | 0,22  | 0,712697139 | -1    | 0,316389296 | 0,41  | 0,808178104 |
| Mtus1   | -0,29 | 0,741755443 | -0,37 | 0,722191399 | -0,62 | 0,334981319 | -0,61 | 0,281402922 | -0,41 | 0,583631554 |
| Mtus2   | -0,51 | 0,460927679 | 0,68  | 0,466784571 | -0,61 | 0,471873683 | -0,17 | 0,78049009  | 0,46  | 0,444576832 |
| Mtx1    | -0,23 | 0,622541886 | -0,67 | 0,137833549 | 0,18  | 0,865157328 | 0,45  | 0,40426262  | -0,04 | 0,969681536 |
| Mtx2    | -0,07 | 0,922118639 | -0,28 | 0,641804702 | 0,28  | 0,747950844 | 0,99  | 0,321312911 | 0,2   | 0,894623317 |
| Mtx3    | -0,14 | 0,842851909 | 0,37  | 0,731637994 | 0,4   | 0,738804472 | 0,4   | 0,6152831   | 0,19  | 0,848854612 |
| Muc1    | 0,56  | 0,351518071 | -0,51 | 0,560608381 | 1,58  | 0,166067688 | -1,17 | 0,023392296 | 1,29  | 0,037726966 |
| Muc13   | 0,53  | 0,449552233 | 0,02  | 0,994161588 | 0,27  | 0,776656833 | 0,76  | 0,121231601 | 1,15  | 0,068448441 |
| Muc15   | -0,01 | 0,991216662 | 0,24  | 0,664446076 | -0,11 | 0,878449636 | -0,2  | 0,779547737 | 0,24  | 0,794769197 |
| Muc16   | -0,23 | 0,540504193 | 0,07  | 0,926210163 | 0,28  | 0,599364835 | 0,01  | 0,993869623 | -0,11 | 0,879072575 |
| Muc19   | -0,15 | 0,786668605 | 0,02  | 0,991131565 | -0,18 | 0,826072965 | -0,38 | 0,507238412 | -0,36 | 0,593298551 |
| Muc2    | 0,39  | 0,472847723 | -0,19 | 0,864363741 | -0,07 | 0,954031929 | 0,13  | 0,799176054 | -0,18 | 0,814651633 |
| Muc20   | -0,12 | 0,892823025 | -0,14 | 0,910688765 | -0,47 | 0,40953269  | 0,43  | 0,584887631 | -0,16 | 0,887083513 |
| Muc3    | -0,01 | 0,993728727 | -0,21 | 0,73623784  | -0,27 | 0,736422567 | 0,35  | 0,782990724 | 0,2   | 0,91597137  |
| Muc3a   | -0,09 | 0,901768047 | -0,07 | 0,94576641  | -0,49 | 0,809062815 | 0,26  | 0,849714217 | 0,03  | 0,987948597 |
| Muc4    | -0,23 | 0,798561927 | -0,32 | 0,65041955  | -0,12 | 0,903942509 | 0,35  | 0,586839746 | 0,08  | 0,930383214 |
| Muc5ac  | 0,05  | 0,948926586 | -0,07 | 0,956049982 | 0,05  | 0,947316802 | -0,01 | 0,992906132 | -0,06 | 0,961281513 |
| Muc5b   | -0,02 | 0,983362248 | -0,13 | 0,815317911 | -0,15 | 0,806102885 | -0,02 | 0,981610833 | -0,17 | 0,829444633 |
| Muc6    | 0,25  | 0,662416763 | 0,19  | 0,726849813 | -0,46 | 0,359711139 | -0,19 | 0,648488024 | -0,12 | 0,884640084 |
| Muc11   | 0,19  | 0,817937614 | -0,61 | 0,318798133 | -0,38 | 0,657897557 | 0,6   | 0,27616081  | -0,01 | 0,992597497 |
| Muc12   | -0,17 | 0,86044657  | -0,28 | 0,80097084  | 0,36  | 0,525516245 | -0,02 | 0,981057922 | 0,06  | 0,957620856 |
| Mug1    | -0,13 | 0,897717279 | 0,68  | 0,677026666 | 0,22  | 0,774812688 | 0,43  | 0,709570719 | 0,35  | 0,675282484 |
| Mug2    | -0,02 | 0,986216037 | 0,69  | 0,654621987 | 0,07  | 0,953345773 | -0,34 | 0,640001073 | 0,02  | 0,986971861 |
| Mug-ps1 | 0,32  | 0,629982502 | 0,09  | 0,961139695 | -0,12 | 0,868798569 | -0,06 | 0,91461361  | 0,04  | 0,964102498 |
| Mul1    | -0,17 | 0,832773897 | 0,03  | 0,975639191 | -0,17 | 0,903675834 | 0,27  | 0,709570719 | 0,21  | 0,824456491 |
| Mum1    | -0,83 | 0,148685247 | -0,19 | 0,83670177  | 0,44  | 0,654328013 | -0,2  | 0,727755417 | -0,4  | 0,551371154 |
| Mum1l1  | 0     | 0,999549745 | -0,09 | 0,898952381 | 0,14  | 0,857466061 | 0,2   | 0,711064066 | 0,81  | 0,202971631 |
| Mup1    | 0,05  | 0,955321816 | 0,23  | 0,855632384 | 0,07  | 0,935778422 | -0,07 | 0,932492162 | 0,17  | 0,847160358 |

|         |       |             |       |             |       |             |       |             |       |             |
|---------|-------|-------------|-------|-------------|-------|-------------|-------|-------------|-------|-------------|
| Mup12   | 0,26  | 0,859044359 | -0,01 | 0,999978061 | -0,91 | 0,395373936 | 0,23  | 0,828955037 | -0,46 | 0,583279373 |
| Mup13   | 0,35  | 0,61321357  | 0,34  | 0,664787536 | -0,1  | 0,901816517 | -0,88 | 0,341125612 | -0,72 | 0,321751898 |
| Mup17   | 1,07  | 0,123851261 | 0,75  | 0,752285577 | 0,54  | 0,317122702 | -1,05 | 0,43471443  | -0,28 | 0,892547331 |
| Mup18   | 0,26  | 0,721484809 | 0,15  | 0,790939978 | 0,12  | 0,884861819 | -0,02 | 0,978782666 | 0,65  | 0,525018839 |
| Mup20   | -0,73 | 0,170739091 | -0,35 | 0,812713089 | -0,12 | 0,930836343 | 0,13  | 0,907406741 | -0,14 | 0,875713596 |
| Mup21   | 0,23  | 0,677390848 | -0,07 | 0,894676428 | 0,03  | 0,964509282 | 0     | 0,999221046 | -0,06 | 0,948759136 |
| Mup3    | -0,84 | 0,194005514 | 0,2   | 0,747707816 | -0,15 | 0,878365741 | -0,42 | 0,604479227 | -0,3  | 0,764656525 |
| Mup4    | 0,03  | 0,986940612 | 0     | 1           | 0,11  | 0,907951869 | 0,05  | 0,923055132 | 0,32  | 0,681102799 |
| Mup5    | 0,41  | 0,418840148 | 0,21  | 0,807175471 | 0,05  | 0,968874924 | -0,09 | 0,94585489  | -0,07 | 0,965244101 |
| Mup7    | -0,06 | 0,948416223 | 0,25  | 0,781046971 | 0,21  | 0,749301845 | -0,31 | 0,477211575 | 0,2   | 0,755115939 |
| Murc    | 0,37  | 0,446014042 | 0,2   | 0,803958341 | 0,2   | 0,77857305  | 0,33  | 0,661795846 | 0,32  | 0,754511071 |
| Mus81   | -0,39 | 0,577943209 | 0,24  | 0,732044571 | 1,11  | 0,206323236 | -0,72 | 0,224298416 | -0,42 | 0,639785525 |
| Musk    | -0,52 | 0,354424228 | 0,21  | 0,728083849 | -0,08 | 0,951210125 | 0,13  | 0,817794705 | 0,43  | 0,468757397 |
| Mustn1  | 0,52  | 0,434641897 | 2,3   | 0,043236689 | -0,89 | 0,233388403 | -0,4  | 0,556282326 | 0,41  | 0,7152803   |
| Mut     | -0,14 | 0,860985365 | 0,07  | 0,897859783 | 0,07  | 0,946952673 | -0,24 | 0,518969598 | -0,19 | 0,745574572 |
| Mutyh   | -0,01 | 0,995091369 | -0,47 | 0,26375548  | 0,58  | 0,332135973 | 0,36  | 0,658876961 | -0,24 | 0,859663155 |
| Mvb12a  | 0,09  | 0,869565514 | -0,04 | 0,955891382 | 0,29  | 0,566351122 | 0,64  | 0,342506678 | 0,45  | 0,556366004 |
| Mvb12b  | -0,34 | 0,428620751 | -0,15 | 0,856130319 | 0,17  | 0,81820534  | -0,15 | 0,779359391 | -0,21 | 0,792234713 |
| Mvd     | -0,71 | 0,178543406 | -0,54 | 0,280779553 | 0,27  | 0,864411302 | 1,95  | 0,032252474 | -0,38 | 0,647175712 |
| Mvk     | 0,4   | 0,453152184 | 0,21  | 0,666450149 | 0,45  | 0,523533834 | -0,33 | 0,334699048 | -0,44 | 0,438444904 |
| Mvp     | -0,02 | 0,972667767 | 0,28  | 0,613449608 | -0,39 | 0,445616611 | 0,84  | 0,113417088 | 0,52  | 0,330314966 |
| Mx1     | 0,01  | 0,992774066 | -0,05 | 0,98459889  | 0,14  | 0,876684089 | 0     | 0,999221046 | 1,57  | 0,114821141 |
| Mx2     | 1,61  | 0,048513596 | 0,8   | 0,204308521 | -0,76 | 0,138915123 | -1,03 | 0,134636808 | 1,25  | 0,060191534 |
| Mxd1    | 0,97  | 0,172698611 | 0,98  | 0,296841418 | -0,24 | 0,702689055 | 0,63  | 0,221822772 | 0,5   | 0,268016026 |
| Mxd3    | -0,43 | 0,565453765 | 0,17  | 0,932292974 | 0,77  | 0,542758274 | 0,3   | 0,509585863 | -0,02 | 0,982779069 |
| Mxd4    | -1,57 | 0,104092085 | -0,71 | 0,373555617 | 0,79  | 0,381994686 | -1,14 | 0,02663501  | -0,96 | 0,08152594  |
| Mxi1    | 0,09  | 0,900892804 | 0,14  | 0,919837212 | 0,28  | 0,715497532 | 0,09  | 0,923775458 | -0,15 | 0,883885544 |
| Mxra7   | -0,25 | 0,707111377 | -0,17 | 0,842793123 | 0,63  | 0,598179126 | 0,32  | 0,43636337  | -0,29 | 0,623046105 |
| Mxra8   | -0,13 | 0,764288636 | 0     | 1           | 0,09  | 0,941063967 | -0,46 | 0,305585853 | -0,87 | 0,136921503 |
| Myadm   | -0,29 | 0,400980668 | -0,16 | 0,732044571 | -0,25 | 0,645038098 | 1,5   | 0,012590736 | -0,96 | 0,075814584 |
| Myadml2 | -0,06 | 0,927072151 | -0,2  | 0,783325809 | -0,02 | 0,989017439 | -0,42 | 0,393694297 | -0,24 | 0,757428993 |
| Myb     | -0,09 | 0,922118639 | 0,07  | 0,950660794 | -0,54 | 0,473499244 | 0,48  | 0,530193027 | 0,11  | 0,913414593 |
| Mybbp1a | -0,74 | 0,092891216 | -0,3  | 0,483304821 | 0,67  | 0,333179926 | 0,82  | 0,114876512 | -0,16 | 0,837163687 |
| Mybl1   | -0,75 | 0,454303769 | -0,59 | 0,575132027 | 0,95  | 0,379638471 | -0,52 | 0,78925905  | -0,15 | 0,960175192 |
| Mybl2   | -0,65 | 0,294535935 | -1,35 | 0,210141501 | 1,08  | 0,180209764 | 2,33  | 0,01133342  | -0,47 | 0,477084157 |

|         |       |             |       |             |       |             |       |             |       |             |
|---------|-------|-------------|-------|-------------|-------|-------------|-------|-------------|-------|-------------|
| Mybpc1  | 0,12  | 0,86264812  | 0,31  | 0,814467082 | -0,23 | 0,770526999 | -0,65 | 0,536277668 | -0,5  | 0,574285481 |
| Mybpc2  | -0,13 | 0,908658974 | -0,16 | 0,869515524 | -0,32 | 0,737821076 | 0,31  | 0,731440527 | 0,06  | 0,973382116 |
| Mybpc3  | 0,6   | 0,316599006 | 0,47  | 0,664765388 | -0,06 | 0,962216849 | -0,18 | 0,717400816 | 0,16  | 0,785294197 |
| Mybph   | -0,04 | 0,953242941 | -0,07 | 0,948441665 | 0,1   | 0,935978536 | 0,18  | 0,613204894 | 0,13  | 0,865258929 |
| Mybphl  | -0,16 | 0,844095084 | 0     | 1           | 0,28  | 0,642542263 | -0,18 | 0,829087694 | 0,07  | 0,969950327 |
| Myc     | 0,34  | 0,697535164 | 0,25  | 0,8205324   | 0,32  | 0,6021281   | 0,08  | 0,923587701 | -0,15 | 0,896309919 |
| Mycbp   | 0,26  | 0,850851423 | 0,3   | 0,593605226 | 0,51  | 0,76652732  | -0,56 | 0,385593155 | -0,68 | 0,444327869 |
| Mycbp2  | -0,1  | 0,842292335 | 0,69  | 0,16121328  | -0,6  | 0,297280818 | -0,15 | 0,805452009 | 1,34  | 0,023943615 |
| Mycbpap | 0,32  | 0,477363665 | 0,04  | 0,956998711 | -0,04 | 0,977827235 | 0,03  | 0,972584224 | -0,23 | 0,837777125 |
| Mycl    | 0,16  | 0,88700256  | 0,5   | 0,577638608 | -0,02 | 0,983759267 | 0,97  | 0,089879955 | -0,15 | 0,866169004 |
| Mycn    | -0,9  | 0,143037124 | -0,71 | 0,548864888 | 0,67  | 0,133545111 | -0,47 | 0,454995407 | -0,29 | 0,656343419 |
| Mycs    | 0,07  | 0,922118639 | 0,46  | 0,65041955  | -0,03 | 0,978886724 | 0,06  | 0,8914104   | -0,39 | 0,510985117 |
| Myct1   | 0,13  | 0,727684698 | 0,25  | 0,582502577 | -0,4  | 0,370800375 | 0,37  | 0,353241029 | -0,01 | 0,990610351 |
| Myd88   | 0,61  | 0,112593072 | 0,26  | 0,510694367 | -0,39 | 0,468413904 | -0,27 | 0,468562522 | 0,73  | 0,111572935 |
| Myd9f   | -0,34 | 0,488619512 | -0,2  | 0,664818804 | 0,14  | 0,832387201 | 0,82  | 0,087185242 | 0,11  | 0,907903208 |
| Myef2   | -0,37 | 0,586458491 | 0,11  | 0,927804354 | 0,22  | 0,830541787 | 1,51  | 0,24812886  | 0,82  | 0,555315018 |
| Myeov2  | 0,08  | 0,869565514 | 0,06  | 0,931100468 | 0,14  | 0,838718162 | 0,58  | 0,150572354 | -0,06 | 0,952190189 |
| Myf5    | -0,19 | 0,826787636 | -0,39 | 0,581340358 | -0,51 | 0,68474418  | 0,78  | 0,183180225 | 0,09  | 0,933307994 |
| Myf6    | -0,04 | 0,946002233 | 0,17  | 0,790939978 | -0,05 | 0,960677449 | -0,13 | 0,823463811 | -0,15 | 0,823776279 |
| Myg1    | -0,04 | 0,944291635 | -0,01 | 0,992175086 | 0,72  | 0,371125662 | 0,03  | 0,981203009 | 0,02  | 0,988084587 |
| Myh1    | -0,24 | 0,768809729 | 0,23  | 0,868462743 | -0,24 | 0,782109018 | -0,16 | 0,897796261 | -0,15 | 0,920852604 |
| Myh10   | -0,63 | 0,255459122 | -0,08 | 0,916496897 | 1,23  | 0,03294007  | 0,86  | 0,065527079 | -0,16 | 0,82517732  |
| Myh11   | -0,03 | 0,979910955 | 0,09  | 0,932292974 | -0,08 | 0,937222375 | -1,93 | 0,019531374 | -0,74 | 0,340689459 |
| Myh13   | 0,1   | 0,904865329 | -0,24 | 0,745921616 | 0,16  | 0,876412565 | 0,76  | 0,24812886  | 0,35  | 0,712121015 |
| Myh14   | -0,06 | 0,949236157 | -0,12 | 0,779951461 | 0,28  | 0,619328985 | 0,49  | 0,225406554 | 0,18  | 0,799638391 |
| Myh15   | 0,17  | 0,875416653 | -0,02 | 0,981758111 | 0,25  | 0,725191296 | -0,5  | 0,619079614 | -0,33 | 0,805287722 |
| Myh2    | -0,04 | 0,972112267 | 1,15  | 0,196295439 | 1,29  | 0,095446477 | 0,15  | 0,891980521 | 0,57  | 0,585861425 |
| Myh3    | 0,4   | 0,544080222 | -0,06 | 0,958856577 | 0,33  | 0,628427952 | -0,13 | 0,879732899 | -0,2  | 0,829280005 |
| Myh4    | -0,11 | 0,934081073 | -1,09 | 0,272116352 | -0,3  | 0,877255565 | 1,07  | 0,071333548 | 0,31  | 0,574932966 |
| Myh6    | 0,22  | 0,808572184 | 0,35  | 0,782172906 | 0,13  | 0,891153267 | 0,15  | 0,81497696  | 0,46  | 0,487064794 |
| Myh7    | -0,56 | 0,25379976  | -0,07 | 0,973945454 | 0,4   | 0,599202081 | 0,18  | 0,716994919 | 0,05  | 0,961406182 |
| Myh7b   | 0,44  | 0,414026998 | -0,1  | 0,897038013 | -0,08 | 0,947460329 | 0,36  | 0,393354297 | 0,14  | 0,864540232 |
| Myh8    | 0,17  | 0,859600103 | -0,41 | 0,720946182 | -0,31 | 0,710867223 | 0,48  | 0,522767386 | 0,16  | 0,932846086 |
| Myh9    | -0,33 | 0,479936768 | -0,19 | 0,638366221 | 0,23  | 0,696594185 | 0,84  | 0,079556462 | -0,46 | 0,434997258 |
| MyI1    | 0,29  | 0,658350988 | 0,29  | 0,472042875 | -0,28 | 0,62846991  | -0,05 | 0,939730251 | 0,15  | 0,864004866 |



|        |       |             |       |             |       |             |       |             |       |             |
|--------|-------|-------------|-------|-------------|-------|-------------|-------|-------------|-------|-------------|
| Myl10  | 0,35  | 0,397054492 | 0,14  | 0,900280666 | -0,08 | 0,909963525 | -0,2  | 0,690488202 | 0,28  | 0,70401038  |
| Myl12b | 0,08  | 0,869225685 | 0     | 1           | 0,05  | 0,964352611 | -0,27 | 0,380741558 | -0,13 | 0,847151957 |
| Myl2   | 0,07  | 0,919110324 | -0,1  | 0,923620953 | 0,07  | 0,925248877 | -0,17 | 0,759281029 | -0,08 | 0,940092696 |
| Myl3   | -0,09 | 0,86901485  | 0,3   | 0,525732306 | 0,15  | 0,846591983 | -0,17 | 0,757176349 | -0,42 | 0,616801731 |
| Myl4   | 0     | 0,998210173 | 0,09  | 0,868234125 | -0,5  | 0,541296354 | 1,67  | 0,011520706 | 0,11  | 0,884640084 |
| Myl6   | -0,19 | 0,70137787  | -0,28 | 0,627230934 | 1,08  | 0,26430961  | 0,49  | 0,556403549 | -0,06 | 0,967545266 |
| Myl6b  | 0,13  | 0,87282087  | -0,28 | 0,740003931 | 0,31  | 0,720603806 | 0,37  | 0,65327421  | 0,08  | 0,950267521 |
| Myl7   | -0,14 | 0,809583841 | 0,05  | 0,969812452 | 0,06  | 0,940543595 | -0,42 | 0,592457782 | 0,43  | 0,623304657 |
| Myl9   | 0,01  | 0,992045436 | 0,12  | 0,958889467 | 0,64  | 0,223969866 | -1,71 | 0,04470267  | -0,82 | 0,278096307 |
| Mylip  | -0,3  | 0,617280733 | -0,18 | 0,764299173 | 0,1   | 0,941514253 | -1,35 | 0,012290044 | -0,35 | 0,504424814 |
| Mylk   | 0,03  | 0,963914207 | 0,25  | 0,806959399 | -0,24 | 0,779859477 | -1,17 | 0,060385323 | -0,3  | 0,719233469 |
| Mylk2  | 0,25  | 0,64392524  | 0,42  | 0,455294676 | 0,03  | 0,986322196 | -0,46 | 0,206268381 | 0,2   | 0,820657685 |
| Mylk3  | 0,06  | 0,919567534 | 0,09  | 0,948409105 | 0,02  | 0,987208663 | 0,4   | 0,487885164 | 0,54  | 0,285970015 |
| Mylk4  | 0,19  | 0,705666778 | -0,23 | 0,56444197  | -0,3  | 0,738804472 | 0,37  | 0,361938497 | 0,32  | 0,620579898 |
| Mylpf  | -0,05 | 0,981669483 | 0,87  | 0,677713323 | -0,1  | 0,925320452 | -1,12 | 0,468566806 | 0,17  | 0,949940453 |
| Mynn   | -0,26 | 0,703606438 | 0,43  | 0,639419375 | 0,07  | 0,962980161 | -0,57 | 0,342333102 | -0,16 | 0,819072786 |
| Myo10  | -0,14 | 0,751237683 | 0,19  | 0,694759677 | 0,08  | 0,915423691 | 1,69  | 0,008160952 | 0,2   | 0,723883531 |
| Myo15  | 0,17  | 0,698332739 | -0,31 | 0,767178812 | -0,21 | 0,72066129  | 0,28  | 0,553626462 | 0,09  | 0,912890826 |
| Myo15b | 0,19  | 0,80226019  | -0,19 | 0,746794144 | 0,24  | 0,794542194 | 0,23  | 0,679648561 | 0,15  | 0,869113953 |
| Myo16  | 0,16  | 0,834551395 | 0,13  | 0,77875496  | -0,24 | 0,681908527 | 0,5   | 0,3487974   | 0,3   | 0,702558142 |
| Myo18a | -0,61 | 0,136095053 | -0,48 | 0,263577661 | -0,04 | 0,960558752 | 0,56  | 0,205000414 | -0,04 | 0,969617491 |
| Myo18b | -0,32 | 0,499157449 | -0,21 | 0,88741189  | 0,32  | 0,708876309 | -0,24 | 0,650385638 | -0,43 | 0,499998316 |
| Myo19  | 0,06  | 0,908516629 | -0,07 | 0,882847123 | 0,21  | 0,778811571 | 1,35  | 0,051245222 | -0,49 | 0,579591044 |
| Myo1a  | 0,07  | 0,936139343 | -0,12 | 0,909079807 | -0,13 | 0,880541271 | -0,14 | 0,866054559 | -0,35 | 0,639071244 |
| Myo1b  | -0,57 | 0,272587269 | -0,2  | 0,668389642 | 0,43  | 0,483029329 | 2,56  | 0,006048812 | -0,32 | 0,760587652 |
| Myo1c  | -0,65 | 0,268001582 | -0,33 | 0,465184328 | 0,29  | 0,57717258  | -0,43 | 0,464638177 | -0,51 | 0,462918176 |
| Myo1d  | -0,15 | 0,764288636 | 0,36  | 0,505287373 | -0,17 | 0,794542194 | 0,42  | 0,283036156 | 0,8   | 0,065968102 |
| Myo1e  | 0,2   | 0,666546952 | 0,39  | 0,325242663 | -0,24 | 0,760468121 | 0,97  | 0,024282032 | 0,26  | 0,611234576 |
| Myo1f  | -0,06 | 0,976237719 | 0,34  | 0,677026666 | -0,37 | 0,563879487 | -0,32 | 0,535895689 | -0,33 | 0,73096179  |
| Myo1g  | -0,2  | 0,792367608 | -0,3  | 0,706671369 | -0,49 | 0,581337628 | 0,52  | 0,228568393 | 0,43  | 0,512907543 |
| Myo1h  | -0,13 | 0,878562194 | 0,28  | 0,77148563  | -0,04 | 0,973732268 | -0,49 | 0,531023057 | -0,22 | 0,827032122 |
| Myo3a  | 0,13  | 0,840218728 | 0,12  | 0,89518658  | -0,45 | 0,530591164 | 0,32  | 0,577709198 | 0,45  | 0,555948564 |
| Myo3b  | 0,03  | 0,966775766 | -0,47 | 0,316289337 | -0,26 | 0,734944001 | 0,62  | 0,268121863 | -0,15 | 0,915395762 |
| Myo5a  | 0,2   | 0,768809729 | 0,65  | 0,271257402 | -0,34 | 0,599202081 | 1,84  | 0,261495927 | 0,98  | 0,574285481 |
| Myo5b  | 0,22  | 0,632053719 | 0,11  | 0,926157704 | -0,53 | 0,22778555  | -0,84 | 0,197646348 | -0,25 | 0,832848337 |

|         |       |             |       |             |       |             |       |             |       |             |
|---------|-------|-------------|-------|-------------|-------|-------------|-------|-------------|-------|-------------|
| Myo5c   | 0,23  | 0,662416763 | 0,23  | 0,778231289 | 0,27  | 0,750372056 | 0,03  | 0,972244785 | 0,33  | 0,697226565 |
| Myo6    | 0,04  | 0,94916801  | 0,1   | 0,854940418 | 0,18  | 0,864284695 | -0,23 | 0,741608871 | -0,01 | 0,991560543 |
| Myo7a   | -0,82 | 0,389763388 | -0,55 | 0,393855735 | 0,73  | 0,251575717 | -0,51 | 0,272589045 | -0,59 | 0,278096307 |
| Myo7b   | -0,08 | 0,887555241 | -0,08 | 0,947684955 | 0,21  | 0,780019254 | 0,32  | 0,616699329 | 0,17  | 0,830263037 |
| Myo9a   | -0,1  | 0,899359458 | 0     | 1           | 0,41  | 0,545465016 | -0,77 | 0,308511029 | -0,04 | 0,979294367 |
| Myo9b   | -0,07 | 0,944291635 | -0,05 | 0,958545812 | 0,27  | 0,796090722 | 0,63  | 0,231231515 | -0,25 | 0,673120647 |
| Myoc    | 0,19  | 0,797266879 | 0,11  | 0,834033845 | -0,06 | 0,955257293 | -0,21 | 0,709570719 | -0,23 | 0,724432778 |
| Myocd   | -0,09 | 0,921564669 | 0,18  | 0,844500324 | -0,33 | 0,638965268 | -0,71 | 0,398422441 | 0,06  | 0,962780187 |
| Myod1   | -0,27 | 0,550101374 | -0,22 | 0,706028548 | -0,18 | 0,746397133 | 0,05  | 0,938111911 | -0,23 | 0,729545211 |
| Myof    | 0,09  | 0,875890831 | -0,06 | 0,911761941 | 0,34  | 0,504301089 | 1,71  | 0,031211972 | 0,07  | 0,965120273 |
| Myog    | -0,01 | 0,985911677 | 0,23  | 0,720857435 | 0,02  | 0,989923808 | -0,04 | 0,932800758 | -0,29 | 0,587305934 |
| Myom1   | 0,41  | 0,488322484 | 0,22  | 0,786394409 | 0,14  | 0,791390652 | -0,44 | 0,562350657 | 0,32  | 0,724896287 |
| Myom2   | 0,04  | 0,963378584 | 0,08  | 0,945143056 | -0,18 | 0,793259393 | -0,92 | 0,469495727 | -0,93 | 0,488057052 |
| Myom3   | 0,31  | 0,653534786 | 0,1   | 0,902965381 | 0,33  | 0,686625108 | -0,17 | 0,648154714 | -0,12 | 0,858526809 |
| Myot    | 0,13  | 0,792392579 | -0,14 | 0,864368418 | -0,02 | 0,990836784 | 0,27  | 0,564724497 | 0,01  | 0,989179767 |
| Myoz1   | -0,06 | 0,954487406 | 0,24  | 0,733708652 | -0,03 | 0,978554254 | 0,06  | 0,90213506  | 0,17  | 0,763240477 |
| Myoz2   | -0,02 | 0,984096321 | -0,12 | 0,807175471 | 0,13  | 0,843617662 | 0,06  | 0,911183081 | -0,27 | 0,717394622 |
| Myoz3   | 0,39  | 0,777632809 | -0,2  | 0,77325041  | 0,03  | 0,983345223 | 0,85  | 0,252992148 | 0,22  | 0,821140509 |
| Mypn    | -0,11 | 0,832696131 | 0,33  | 0,71205848  | -0,09 | 0,878636183 | -0,27 | 0,642906557 | -0,02 | 0,980961333 |
| Mypop   | 0,03  | 0,949236157 | 0     | 1           | -0,18 | 0,741623367 | 0,17  | 0,743170266 | 0,05  | 0,960905448 |
| Mypopos | -0,51 | 0,600246297 | -0,21 | 0,842793123 | 0,43  | 0,493193538 | 0,71  | 0,371779111 | 0,09  | 0,951223734 |
| Myrf    | 0,05  | 0,957820843 | 0,13  | 0,903674951 | -0,49 | 0,470737941 | 0,25  | 0,515951598 | 0,17  | 0,779920985 |
| Myrfl   | 0,06  | 0,957856459 | 0,41  | 0,692004648 | -0,27 | 0,8271738   | 1,08  | 0,160390801 | 1,24  | 0,328817797 |
| Myrip   | -0,26 | 0,5976608   | 0,1   | 0,849062708 | -0,34 | 0,647006895 | -3    | 0,003009221 | -1,51 | 0,06170512  |
| Mysm1   | 0,41  | 0,496069833 | 0,27  | 0,639167098 | -0,3  | 0,742605945 | -0,55 | 0,432664716 | 0,16  | 0,880404482 |
| Myt1    | 0,1   | 0,909036289 | -0,12 | 0,919762719 | 0,24  | 0,756730031 | 0,3   | 0,588844463 | 0,11  | 0,905581898 |
| Myt1l   | 0,14  | 0,843029805 | -0,29 | 0,569562625 | -0,14 | 0,83603209  | 0,38  | 0,576482361 | -0,12 | 0,937558003 |
| Myzap   | -0,32 | 0,532948347 | 0,2   | 0,822394328 | -0,03 | 0,978012085 | 2,24  | 0,053438615 | 0,7   | 0,512028199 |
| Mzb1    | 0,07  | 0,910758076 | 0,07  | 0,884434898 | -0,01 | 0,989417324 | 0,11  | 0,884705528 | -0,18 | 0,845218636 |
| Mzf1    | -0,36 | 0,569551758 | -0,11 | 0,87464113  | -0,09 | 0,938864861 | 0,11  | 0,856710718 | -0,13 | 0,886129263 |
| Mzt1    | -0,1  | 0,82381419  | 0,17  | 0,802788292 | 0,05  | 0,959990799 | 0,25  | 0,596712266 | 0,19  | 0,774032893 |
| Mzt2    | -0,29 | 0,680861685 | -0,27 | 0,585138173 | 1,16  | 0,342313446 | 0,27  | 0,490176405 | -0,73 | 0,136162672 |
| N4bp1   | 0,2   | 0,662416763 | 0,04  | 0,954324398 | 0     | 0,997220401 | 0,97  | 0,151254716 | 0,81  | 0,196710506 |
| N4bp2   | -0,34 | 0,606736947 | 0,21  | 0,748874675 | 1,35  | 0,09059546  | 0,13  | 0,900918368 | -0,4  | 0,692565666 |
| N4bp211 | 0,15  | 0,892823025 | -0,02 | 0,972021564 | -0,16 | 0,920858287 | -0,61 | 0,476284901 | -0,21 | 0,874554354 |

|          |       |             |       |             |       |             |       |             |       |             |
|----------|-------|-------------|-------|-------------|-------|-------------|-------|-------------|-------|-------------|
| N4bp2l2  | 0,42  | 0,301985815 | 0,2   | 0,704013569 | 0,51  | 0,569097406 | -0,12 | 0,783528833 | 0,43  | 0,445673178 |
| N4bp2os  | -0,34 | 0,850851423 | 0,85  | 0,704809156 | -1,14 | 0,463843173 | -0,24 | 0,729857506 | 0,86  | 0,473714089 |
| N4bp3    | -0,27 | 0,452192762 | 0,01  | 0,991507752 | 0,5   | 0,372507295 | 0,64  | 0,264298399 | -0,39 | 0,587305934 |
| N6amt1   | -0,08 | 0,918758168 | -0,05 | 0,956049982 | 0,26  | 0,777417583 | -0,19 | 0,676020276 | -0,54 | 0,354250234 |
| Naa11    | -0,45 | 0,391361341 | 0,28  | 0,628151214 | 0,04  | 0,977939889 | 0,11  | 0,825908912 | 0,12  | 0,892547331 |
| Naa15    | -0,38 | 0,301226191 | 0,02  | 0,986782918 | 0,28  | 0,687543093 | 0,54  | 0,389207462 | 0,55  | 0,439038071 |
| Naa16    | 0,34  | 0,829838991 | 0,05  | 0,965147491 | -0,16 | 0,887446966 | -1,02 | 0,068295433 | 0,13  | 0,917356423 |
| Naa20    | 0,27  | 0,546166185 | 0,31  | 0,508633526 | -0,24 | 0,689298982 | 0,32  | 0,376628904 | 0,29  | 0,587305934 |
| Naa25    | 0,43  | 0,485159825 | 0,48  | 0,429168189 | -0,4  | 0,56948206  | 1,43  | 0,045809254 | 1,76  | 0,014471757 |
| Naa30    | -0,67 | 0,617280733 | 0,24  | 0,873628464 | 1,53  | 0,31338379  | 1,22  | 0,650385638 | 1,39  | 0,581814709 |
| Naa35    | -0,4  | 0,246908489 | -0,23 | 0,671319666 | 0,96  | 0,036818657 | 0     | 0,997771107 | -0,15 | 0,824727805 |
| Naa38    | 0,22  | 0,59710379  | -0,08 | 0,873942925 | 0,06  | 0,942815063 | -0,37 | 0,212213828 | 0,03  | 0,970154126 |
| Naa40    | -0,54 | 0,574307926 | 0     | 1           | 0,54  | 0,485752425 | 0,66  | 0,357720393 | 0,26  | 0,821517568 |
| Naa50    | -0,15 | 0,820381676 | -0,42 | 0,348856843 | 0,53  | 0,299010171 | 1,23  | 0,035669024 | -0,11 | 0,898309858 |
| Naa60    | -0,19 | 0,730965673 | -0,55 | 0,60727944  | 0,36  | 0,62535327  | 0,17  | 0,656372073 | -0,13 | 0,873380019 |
| Naaa     | 0,09  | 0,94916801  | 0,28  | 0,756778611 | 0,55  | 0,610313044 | -1,45 | 0,037765492 | 0,19  | 0,832736649 |
| Naalad2  | -0,34 | 0,775384541 | 0,13  | 0,945143056 | -0,46 | 0,660517013 | -0,1  | 0,947477693 | -0,76 | 0,479727901 |
| Naaladl1 | 0,38  | 0,620681779 | 0,13  | 0,793603525 | 0,18  | 0,842022835 | -0,17 | 0,829087694 | -0,29 | 0,739121045 |
| Naaladl2 | 0,01  | 0,99460683  | -0,26 | 0,537510632 | -0,06 | 0,959437564 | 0,1   | 0,8914104   | -0,02 | 0,982175252 |
| Nab1     | 0,23  | 0,617561302 | 0,33  | 0,701120461 | 0,33  | 0,776419989 | 0,53  | 0,337394458 | 0,59  | 0,223294439 |
| Nab2     | -0,04 | 0,944652244 | 0,11  | 0,824838316 | 0,28  | 0,647365248 | -0,06 | 0,897883112 | 0,05  | 0,948935854 |
| Nabp1    | 0,86  | 0,135065204 | 0,67  | 0,231183878 | -0,49 | 0,339425194 | -1,21 | 0,041977017 | 0,39  | 0,567367057 |
| Nabp2    | -0,56 | 0,277692472 | -0,51 | 0,513834808 | 0     | 0,999002132 | 0,31  | 0,77523305  | -0,62 | 0,594109073 |
| Naca     | -0,11 | 0,832513798 | -0,05 | 0,955382206 | 0,12  | 0,873974443 | 0,65  | 0,118739789 | 0,23  | 0,656696368 |
| Nacad    | 0,16  | 0,883674476 | 0,05  | 0,978904487 | 0,15  | 0,916362962 | 0,26  | 0,859917636 | 0,29  | 0,862456985 |
| Nacc1    | -0,07 | 0,895400682 | -0,19 | 0,812664394 | 0,32  | 0,432912125 | 1     | 0,069351821 | -0,15 | 0,843403563 |
| Nacc2    | -0,01 | 0,995013944 | 0,13  | 0,866844066 | 0,26  | 0,803799149 | -0,7  | 0,292303436 | -0,08 | 0,961281513 |
| Nadk     | -0,58 | 0,314547808 | -0,4  | 0,279092572 | 0,08  | 0,941063967 | 0,33  | 0,382558073 | -0,47 | 0,508153495 |
| Nadk2    | 0,23  | 0,724976228 | 0,22  | 0,88928164  | 0,51  | 0,569097406 | -0,44 | 0,698362346 | -0,29 | 0,801907131 |
| Nadsyn1  | -0,53 | 0,214139353 | -0,57 | 0,261025347 | 0,17  | 0,894339966 | -0,15 | 0,655615002 | -0,34 | 0,579652851 |
| Nae1     | -0,16 | 0,697053625 | 0,01  | 0,994137877 | 0,49  | 0,660920525 | -0,24 | 0,595767103 | 0,68  | 0,1502613   |
| Naf1     | -0,88 | 0,239601221 | -0,1  | 0,943782735 | 0,65  | 0,599202081 | 0,27  | 0,608625666 | -0,08 | 0,931334905 |
| Naga     | -0,19 | 0,749658322 | 0,19  | 0,701043773 | -0,04 | 0,977897176 | -0,54 | 0,227359898 | -0,2  | 0,80222716  |
| Nagk     | -0,21 | 0,672882915 | 0,5   | 0,306045228 | 0,15  | 0,849342965 | -0,44 | 0,257020934 | 0,31  | 0,632478417 |
| Naglu    | 0,1   | 0,89785374  | -0,04 | 0,962138182 | 1,19  | 0,0965448   | 0,06  | 0,947809027 | -0,5  | 0,625751363 |

|         |       |             |       |             |       |             |       |             |       |             |
|---------|-------|-------------|-------|-------------|-------|-------------|-------|-------------|-------|-------------|
| Nagpa   | -0,85 | 0,087910462 | -0,31 | 0,726652101 | 0,18  | 0,843091338 | 0,68  | 0,222486467 | -0,12 | 0,899196564 |
| Nags    | -0,14 | 0,7830424   | -0,06 | 0,934627513 | 0,01  | 0,993379272 | 0,28  | 0,561554743 | 0,04  | 0,96669952  |
| Naif1   | -0,22 | 0,769499657 | -0,17 | 0,84786877  | -0,01 | 0,997268369 | -0,61 | 0,092297986 | -0,59 | 0,240813036 |
| Naip1   | 0,15  | 0,877707741 | 0,04  | 0,942965593 | -0,23 | 0,715407764 | -0,27 | 0,663101159 | 0,12  | 0,929127539 |
| Naip2   | -0,02 | 0,991919022 | -0,4  | 0,583764309 | -0,38 | 0,867543859 | -1,21 | 0,049767391 | 0,13  | 0,917030581 |
| Naip5   | 0,42  | 0,468376366 | -0,13 | 0,882931058 | 0,27  | 0,817818413 | -1,17 | 0,195855387 | 0,17  | 0,920748161 |
| Naip6   | 0,5   | 0,704646948 | 0,08  | 0,954024651 | 0,44  | 0,666305832 | -0,6  | 0,36306956  | 0,61  | 0,444627076 |
| Nalcn   | -0,23 | 0,821712184 | 0,12  | 0,91472637  | 0,05  | 0,962766843 | 0,03  | 0,976294623 | 0,16  | 0,871038748 |
| Nampt   | 1,83  | 0,097625832 | 1,84  | 0,0802723   | -1,85 | 0,013149311 | -0,03 | 0,971338071 | 1,98  | 0,006808729 |
| Nanog   | 0,06  | 0,943640471 | 0,1   | 0,88899358  | -0,02 | 0,990836784 | -0,04 | 0,95852873  | 0,49  | 0,373929884 |
| Nanos1  | -0,11 | 0,839375532 | -0,04 | 0,942422049 | -0,19 | 0,742605945 | 0,06  | 0,89200185  | 0,13  | 0,853107295 |
| Nanos2  | -0,59 | 0,630133896 | -0,78 | 0,352228531 | -0,18 | 0,935887545 | -0,23 | 0,812558961 | -0,91 | 0,587440076 |
| Nanos3  | 0,16  | 0,766632463 | -0,24 | 0,781665479 | 0,25  | 0,571082984 | -0,23 | 0,695292709 | -0,38 | 0,525018839 |
| Nanp    | -0,02 | 0,989017567 | -0,06 | 0,917256002 | -0,48 | 0,452872263 | 0,15  | 0,718237629 | 0,17  | 0,773401088 |
| Nans    | -0,65 | 0,431394932 | -0,57 | 0,505731706 | 1,04  | 0,042769944 | 0,93  | 0,073909416 | -0,34 | 0,635102193 |
| Nap111  | -0,21 | 0,671519156 | -0,45 | 0,457955392 | 0,63  | 0,566665175 | 1,01  | 0,076927362 | 0,5   | 0,331912927 |
| Nap112  | -0,33 | 0,469692532 | -0,24 | 0,568304052 | -0,37 | 0,521457644 | -0,13 | 0,834439251 | -0,54 | 0,398637431 |
| Nap113  | 0,06  | 0,950669622 | 0,34  | 0,802979985 | -0,23 | 0,730814266 | -1,09 | 0,380621854 | -0,13 | 0,960313057 |
| Nap114  | -0,44 | 0,374444487 | -0,4  | 0,474146508 | 0,39  | 0,58160408  | 0,8   | 0,142808635 | -0,13 | 0,904836805 |
| Nap115  | 0,13  | 0,824801241 | -0,08 | 0,935041212 | -0,08 | 0,926974012 | -0,4  | 0,588987424 | -0,8  | 0,360726287 |
| Napa    | -0,13 | 0,871941635 | 0,19  | 0,781665479 | 0,44  | 0,374722202 | -0,14 | 0,812625466 | 0,04  | 0,961406182 |
| Napb    | 0,42  | 0,777335496 | 0,42  | 0,66616142  | -0,1  | 0,90531201  | -0,84 | 0,280580294 | -0,38 | 0,655956123 |
| Napepld | -0,8  | 0,345171513 | -0,17 | 0,756778611 | -0,23 | 0,868609956 | 0,16  | 0,728457986 | -1,16 | 0,309184866 |
| Napg    | -0,13 | 0,84900712  | 0,12  | 0,896187678 | 0,51  | 0,270116127 | 0,23  | 0,772508671 | 0,53  | 0,483828306 |
| Naprt   | -0,05 | 0,948538969 | 0,06  | 0,929289366 | 0,3   | 0,791940256 | -0,15 | 0,831764227 | -0,69 | 0,508708397 |
| Napsa   | -0,11 | 0,917759029 | 0,55  | 0,592608996 | -0,03 | 0,985977985 | -0,82 | 0,191379842 | 0,33  | 0,724432778 |
| Narf    | 0,2   | 0,74672311  | 0,22  | 0,762295026 | -0,17 | 0,881389249 | 0,82  | 0,097982236 | 0,24  | 0,745134899 |
| Narfl   | 0,34  | 0,581127661 | 0,45  | 0,415037534 | 0,05  | 0,967216564 | -0,08 | 0,912379276 | -0,07 | 0,950308536 |
| Nars    | 0,12  | 0,846840544 | -0,1  | 0,813541606 | 0,04  | 0,973289898 | 1,13  | 0,085752952 | 0,53  | 0,490706572 |
| Nars2   | -0,41 | 0,66609472  | 0,05  | 0,958449675 | 0,03  | 0,98773763  | -0,35 | 0,617560575 | -0,58 | 0,750167943 |
| Nasp    | -0,73 | 0,179001759 | -0,8  | 0,501055005 | 0,54  | 0,504482377 | 0,39  | 0,736545814 | 0,39  | 0,708524118 |
| Nat1    | 0,34  | 0,377858236 | -0,08 | 0,91395667  | -0,09 | 0,913878204 | 0,31  | 0,30684572  | 0,11  | 0,871038748 |
| Nat10   | -0,08 | 0,910119824 | -0,69 | 0,149865451 | 0,45  | 0,702072682 | 0,72  | 0,241162703 | -0,57 | 0,390014692 |
| Nat14   | 0,32  | 0,76205049  | 0,21  | 0,828219939 | -0,16 | 0,924910686 | 0,24  | 0,754680425 | 0,38  | 0,735152891 |
| Nat2    | -0,2  | 0,797266879 | 0,38  | 0,462629989 | -0,41 | 0,721749926 | -0,12 | 0,932315462 | -0,48 | 0,721664501 |

|        |       |             |       |             |       |             |       |             |       |             |
|--------|-------|-------------|-------|-------------|-------|-------------|-------|-------------|-------|-------------|
| Nat3   | 0,14  | 0,857585372 | 0,03  | 0,981841181 | -0,24 | 0,737532305 | -0,12 | 0,840088402 | -0,62 | 0,55122001  |
| Nat6   | 0,15  | 0,803557792 | 0,14  | 0,855822577 | 0,03  | 0,977306521 | -0,42 | 0,394383519 | 0,08  | 0,939169005 |
| Nat8   | 0,25  | 0,721797378 | 0,54  | 0,425583607 | 0,09  | 0,910110982 | -0,55 | 0,452631406 | -0,3  | 0,851207222 |
| Nat8f1 | -0,48 | 0,3366965   | 0,17  | 0,894640653 | 0,28  | 0,712697139 | -1,55 | 0,081353857 | -0,58 | 0,407954965 |
| Nat8f2 | -0,02 | 0,98456417  | -0,72 | 0,426673512 | 0,22  | 0,770526413 | 0,01  | 0,987032241 | -0,49 | 0,504009987 |
| Nat8f3 | -0,11 | 0,936932777 | 0,17  | 0,897811179 | -0,18 | 0,884861819 | 0,1   | 0,894580364 | 0,12  | 0,905581898 |
| Nat8f4 | -0,26 | 0,68194299  | -0,65 | 0,356307531 | 0,17  | 0,885042765 | 0,38  | 0,220062272 | 1,32  | 0,150296522 |
| Nat8f5 | -0,29 | 0,707216362 | -0,09 | 0,954143906 | -0,13 | 0,932866273 | -0,16 | 0,753096133 | -0,19 | 0,797434894 |
| Nat8f7 | 0,25  | 0,627641756 | 0,02  | 0,965147491 | 0,05  | 0,944441051 | 0,05  | 0,95988861  | 0,38  | 0,717051042 |
| Nat8l  | 0,28  | 0,575887113 | 0,07  | 0,873628464 | 0,01  | 0,994838841 | 0,59  | 0,447973475 | 0,07  | 0,950965682 |
| Nat9   | 0,42  | 0,395836686 | 0,17  | 0,818613446 | -0,31 | 0,782988471 | -0,1  | 0,852393014 | -0,1  | 0,914376009 |
| Natd1  | -0,05 | 0,96263856  | 0,08  | 0,907167997 | -0,04 | 0,952888594 | 0,66  | 0,202828915 | -0,01 | 0,992997824 |
| Nav1   | -0,2  | 0,627134371 | -0,45 | 0,435170839 | 0     | 0,997548073 | 0,4   | 0,308218931 | -0,38 | 0,556366004 |
| Nav2   | -0,22 | 0,738998158 | -0,48 | 0,38136997  | 0,03  | 0,990836784 | 0,11  | 0,798893106 | -0,09 | 0,934636927 |
| Nav3   | -0,19 | 0,654363277 | 0,05  | 0,980518468 | 0,07  | 0,953272779 | 1,37  | 0,126764127 | -0,63 | 0,373032993 |
| Nbas   | -0,3  | 0,429961007 | -0,62 | 0,509013394 | 0,35  | 0,622546805 | 0,3   | 0,57095196  | -0,25 | 0,675519772 |
| Nbea   | -0,03 | 0,969949459 | 0,46  | 0,383504117 | -0,22 | 0,776071062 | -0,04 | 0,969859375 | 0,53  | 0,442579293 |
| Nbeal1 | 0,29  | 0,514370213 | 0,37  | 0,546011829 | -0,73 | 0,218714399 | -0,62 | 0,378525142 | 0,13  | 0,910083563 |
| Nbeal2 | -0,4  | 0,536274184 | 0,03  | 0,977204386 | 0,29  | 0,712697139 | -1,03 | 0,039981848 | -0,38 | 0,493919589 |
| Nbl1   | 0,13  | 0,874037681 | 0,42  | 0,397249215 | 0,01  | 0,997220401 | -0,28 | 0,835733642 | 0,22  | 0,89284344  |
| Nbn    | 0,2   | 0,703606438 | 0,16  | 0,828219939 | -0,04 | 0,96858449  | -0,59 | 0,485223835 | 0,8   | 0,354557431 |
| Nbr1   | -0,06 | 0,915547728 | -0,03 | 0,974153801 | -0,04 | 0,973732268 | -0,25 | 0,664507481 | -0,09 | 0,918288793 |
| Ncald  | 0,14  | 0,884190046 | -0,06 | 0,961139695 | 0,05  | 0,953951069 | -0,84 | 0,332781724 | -0,36 | 0,705203579 |
| Ncam1  | -0,69 | 0,505659923 | 0,31  | 0,763005394 | 1,81  | 0,010231053 | -1,54 | 0,082587993 | -0,49 | 0,545351562 |
| Ncam2  | 0,24  | 0,734692472 | 0,14  | 0,910022982 | 0,56  | 0,196670902 | -0,09 | 0,823146103 | -0,11 | 0,914498972 |
| Ncan   | 0,11  | 0,915624801 | 0,05  | 0,956555856 | 0,08  | 0,922318683 | 0,02  | 0,976464748 | -0,25 | 0,735152891 |
| Ncapd2 | -1,24 | 0,036771167 | -1,22 | 0,138101221 | 1,08  | 0,238428106 | 1,98  | 0,013493602 | -0,25 | 0,744868254 |
| Ncapd3 | -0,48 | 0,642047563 | -0,57 | 0,496584866 | 1,08  | 0,138231916 | -0,07 | 0,932315462 | -0,74 | 0,329003365 |
| Ncapg  | -1,38 | 0,372648236 | -1,62 | 0,087315688 | 1,34  | 0,11637989  | 3,15  | 0,006593374 | -0,09 | 0,939448119 |
| Ncapg2 | -0,74 | 0,472847723 | -2,24 | 0,040620931 | 0,73  | 0,429349789 | 1,78  | 0,018497748 | -0,43 | 0,583952152 |
| Ncaph  | -1,23 | 0,161138881 | -1,11 | 0,111626097 | 1,06  | 0,145335521 | 2,18  | 0,006378578 | -0,38 | 0,49195784  |
| Ncaph2 | -0,06 | 0,934482351 | -0,52 | 0,257624607 | 0,16  | 0,825125026 | 0,53  | 0,447310044 | -0,4  | 0,673145862 |
| Ncbp1  | -0,65 | 0,170739091 | -0,22 | 0,690263811 | 0,91  | 0,273645359 | 0,31  | 0,498525843 | 0,11  | 0,886277205 |
| Ncbp2  | -0,25 | 0,642516435 | -0,49 | 0,493580894 | -0,36 | 0,660920525 | -0,42 | 0,203489883 | -0,55 | 0,527807778 |
| Ncbp3  | -0,78 | 0,302609278 | -0,18 | 0,701043773 | 0,12  | 0,894239558 | 0,2   | 0,669457175 | -0,2  | 0,791800359 |

|           |       |             |       |             |       |             |       |             |       |             |
|-----------|-------|-------------|-------|-------------|-------|-------------|-------|-------------|-------|-------------|
| Nccrp1    | 0,31  | 0,665625405 | 0,45  | 0,662134711 | -0,1  | 0,909371204 | -0,13 | 0,881406072 | 0,1   | 0,922921816 |
| Ncdn      | -0,47 | 0,278121865 | -0,1  | 0,856600114 | 0,22  | 0,652988297 | 0,27  | 0,701365109 | -0,2  | 0,817625207 |
| Nceh1     | -0,12 | 0,914180919 | -0,09 | 0,954024651 | 0,08  | 0,928438649 | -0,72 | 0,384319247 | -0,59 | 0,662728263 |
| Ncf1      | -0,28 | 0,588986046 | 0,39  | 0,648582774 | 0,37  | 0,647014995 | 0,18  | 0,8556361   | 0,44  | 0,578525022 |
| Ncf2      | -0,24 | 0,754698324 | -0,11 | 0,912340934 | 0,3   | 0,575554281 | 0,88  | 0,273752732 | -0,6  | 0,525018839 |
| Ncf4      | 0,04  | 0,975949545 | -0,22 | 0,792112243 | 0,37  | 0,756730031 | 0,31  | 0,619961752 | -0,34 | 0,715251255 |
| Nck1      | -0,15 | 0,816596478 | -0,43 | 0,445520469 | 0,08  | 0,947881687 | 0,4   | 0,400733868 | -0,21 | 0,788659175 |
| Nck2      | -0,13 | 0,773899768 | 0,14  | 0,809683705 | 0,46  | 0,527929204 | 1,29  | 0,036167532 | -0,24 | 0,698177269 |
| Nckap1    | -0,11 | 0,81313264  | -0,11 | 0,832117565 | -0,06 | 0,950052494 | 0,41  | 0,240941728 | 0,05  | 0,948163009 |
| Nckap1l   | 0,41  | 0,563164645 | -0,66 | 0,426168855 | 0,5   | 0,775163644 | 1,37  | 0,066882997 | 0,63  | 0,400708488 |
| Nckap5    | 1,02  | 0,104092085 | 0,64  | 0,402393337 | -0,66 | 0,479824278 | 0,08  | 0,911958998 | 0,16  | 0,937009323 |
| Nckap5l   | -0,53 | 0,232916935 | -0,15 | 0,7296094   | 0,15  | 0,836535196 | 1,36  | 0,01083158  | -0,42 | 0,41050164  |
| Nckap5los | -0,41 | 0,575887113 | 0,06  | 0,956049982 | -0,37 | 0,645449124 | 0,08  | 0,907539958 | 0,06  | 0,94919447  |
| Nckipsd   | -0,37 | 0,722588324 | -0,21 | 0,622161495 | 0,21  | 0,855887253 | -1,4  | 0,031766422 | -1,44 | 0,018828223 |
| Ncl       | -0,5  | 0,200967908 | -0,68 | 0,35967644  | 0,39  | 0,614237718 | 0,84  | 0,120895967 | 0,24  | 0,673145862 |
| Ncln      | -0,27 | 0,59710379  | -0,69 | 0,150681594 | 0,35  | 0,488122899 | 0,78  | 0,059597561 | -0,29 | 0,565817768 |
| Ncmap     | 0,04  | 0,975506993 | 0,01  | 0,995205602 | 0,31  | 0,702677589 | -0,07 | 0,932315462 | -0,18 | 0,844394811 |
| Ncoa1     | -1,05 | 0,030605134 | -0,1  | 0,894563348 | -0,07 | 0,949135765 | -1,35 | 0,017791354 | -0,39 | 0,447019099 |
| Ncoa2     | 0,28  | 0,630133896 | 0,28  | 0,51825831  | 0,37  | 0,696594185 | -0,77 | 0,062509558 | -0,47 | 0,317053551 |
| Ncoa3     | -0,1  | 0,898572877 | 0,23  | 0,643895096 | -0,24 | 0,656935528 | -1,53 | 0,010696159 | -0,29 | 0,638112258 |
| Ncoa4     | -0,48 | 0,317205194 | -0,38 | 0,640836969 | 0,35  | 0,669266652 | 0,01  | 0,983166423 | -0,17 | 0,84701421  |
| Ncoa5     | -0,35 | 0,617280733 | -0,47 | 0,435223036 | -0,02 | 0,990836784 | 0,11  | 0,874607411 | -0,17 | 0,850611225 |
| Ncoa6     | -0,32 | 0,634129153 | -0,2  | 0,701236298 | 0,12  | 0,857981964 | -0,14 | 0,676494133 | -0,05 | 0,949178165 |
| Ncoa7     | 0,46  | 0,248880298 | 1,17  | 0,095493366 | -0,2  | 0,724675525 | -1,55 | 0,017698482 | -0,06 | 0,954565959 |
| Ncor1     | -0,17 | 0,716985606 | -0,03 | 0,958545812 | -0,09 | 0,899387868 | -0,27 | 0,471387138 | -0,06 | 0,940774655 |
| Ncor2     | -0,61 | 0,173739614 | -0,76 | 0,218623097 | 0,23  | 0,729592327 | 0,2   | 0,648154714 | -0,61 | 0,156796208 |
| Ncr1      | 0,13  | 0,922017456 | 0,2   | 0,734096329 | -0,42 | 0,584413631 | -0,64 | 0,2423686   | -0,29 | 0,752900829 |
| Ncs1      | 0,01  | 0,998017023 | 0,01  | 1           | 0,53  | 0,476821653 | 0,18  | 0,899003207 | -0,43 | 0,697818445 |
| Ncstn     | -0,11 | 0,851458474 | -0,22 | 0,669713758 | 0,14  | 0,877714146 | 0,07  | 0,857910103 | -0,62 | 0,242796082 |
| Nctc1     | 0,08  | 0,898269435 | 0,31  | 0,604913956 | -0,4  | 0,537504575 | -0,04 | 0,959440164 | 0     | 0,995351393 |
| ND3       | 0,21  | 0,74764092  | -0,46 | 0,649104789 | 0,14  | 0,913228427 | -0,67 | 0,163529439 | -0,06 | 0,940438527 |
| ND6       | -0,56 | 0,151559036 | -0,17 | 0,77325041  | -0,36 | 0,774812688 | 0,2   | 0,635869722 | -0,2  | 0,843351909 |
| Ndc1      | -0,84 | 0,087125838 | -1,52 | 0,0802723   | 2,37  | 0,186321498 | 1,18  | 0,026588488 | -0,82 | 0,149017743 |
| Ndc80     | -1,37 | 0,233235566 | -1,29 | 0,275854898 | 1,35  | 0,243511638 | 2,46  | 0,048061854 | 0,93  | 0,563077271 |
| Nde1      | -0,53 | 0,520900349 | -0,73 | 0,431022747 | 0,18  | 0,8191559   | 0,63  | 0,363783828 | 0,07  | 0,947287491 |

|          |       |             |       |             |       |             |       |             |       |             |
|----------|-------|-------------|-------|-------------|-------|-------------|-------|-------------|-------|-------------|
| Ndel1    | 0,11  | 0,816534187 | 0,06  | 0,929289366 | 0,06  | 0,950846671 | 0,05  | 0,934539929 | -0,16 | 0,836898158 |
| Ndfip1   | 0,12  | 0,810101389 | -0,18 | 0,664787536 | 0,43  | 0,374422909 | 0,72  | 0,061358334 | 0,05  | 0,949178165 |
| Ndfip2   | 0,13  | 0,785669218 | 0,14  | 0,794404033 | -0,29 | 0,742757109 | 0,75  | 0,444137162 | 0,83  | 0,346144761 |
| Ndn      | -0,2  | 0,757032046 | 0,05  | 0,938233008 | -0,1  | 0,906301115 | -0,39 | 0,376988783 | -0,43 | 0,339052455 |
| Ndnf     | -0,2  | 0,740529913 | -0,32 | 0,589733014 | -0,1  | 0,884898822 | -0,18 | 0,861762288 | -0,6  | 0,635612479 |
| Ndni2    | -0,26 | 0,619786394 | 0,14  | 0,833450181 | 0,45  | 0,584497049 | -0,23 | 0,66448476  | -0,07 | 0,948163009 |
| Ndor1    | -0,2  | 0,621285092 | -0,19 | 0,800824492 | 0,11  | 0,941627748 | -0,02 | 0,970626458 | -0,34 | 0,642882589 |
| Ndp      | -0,08 | 0,938388549 | -0,13 | 0,821227978 | -0,14 | 0,841563482 | 0,26  | 0,535895689 | 0,08  | 0,918529364 |
| Ndrg1    | 0,62  | 0,097625832 | 0,21  | 0,769551285 | -0,18 | 0,763408801 | -0,38 | 0,405337222 | -0,15 | 0,846540618 |
| Ndrg2    | -0,22 | 0,895278749 | 0,91  | 0,319029651 | -0,36 | 0,571731557 | -4,56 | 0,012951164 | -0,34 | 0,830268209 |
| Ndrg3    | -0,34 | 0,454303769 | 0,11  | 0,898154642 | 0,57  | 0,702605492 | -0,62 | 0,430077927 | -0,27 | 0,809134979 |
| Ndrg4    | -0,65 | 0,208055013 | -0,3  | 0,809874756 | 0,63  | 0,299010171 | 0,71  | 0,314372136 | -0,21 | 0,874554354 |
| Ndst1    | 0,14  | 0,740466159 | 0,03  | 0,985151214 | -0,01 | 0,996533557 | 0,42  | 0,500335174 | -0,13 | 0,875421436 |
| Ndst2    | -0,19 | 0,835016158 | -0,04 | 0,97657246  | 0,07  | 0,95204022  | -0,72 | 0,325137997 | -0,71 | 0,359684366 |
| Ndst3    | -0,1  | 0,906885053 | 0     | 1           | -0,14 | 0,90346916  | -0,64 | 0,280843942 | 0,42  | 0,545134155 |
| Ndst4    | -0,04 | 0,953499784 | -0,25 | 0,752038109 | -0,08 | 0,906486836 | 0,18  | 0,829087694 | -0,18 | 0,856410489 |
| Ndufa1   | 0,1   | 0,832773897 | -0,13 | 0,777999988 | 0     | 0,997439771 | 0,26  | 0,472853425 | -0,18 | 0,743487161 |
| Ndufa10  | -0,33 | 0,401159049 | -0,13 | 0,785128233 | 0,2   | 0,79284622  | 0,65  | 0,455720371 | 0,1   | 0,947300798 |
| Ndufa11  | 0,18  | 0,840909921 | -0,05 | 0,981586987 | 0,15  | 0,879225295 | -0,08 | 0,941093315 | 0,11  | 0,940092696 |
| Ndufa12  | -0,28 | 0,465168175 | -0,2  | 0,807175471 | -0,12 | 0,952019801 | 0,61  | 0,335755837 | -0,19 | 0,831446445 |
| Ndufa13  | 0,07  | 0,92366013  | 0,16  | 0,741958532 | 0,58  | 0,2967399   | -0,35 | 0,325733552 | -0,3  | 0,565817768 |
| Ndufa2   | -0,11 | 0,800851935 | -0,11 | 0,850776298 | 0,42  | 0,438617552 | 0,23  | 0,585901571 | 0,06  | 0,948163009 |
| Ndufa3   | 0,12  | 0,787002876 | -0,18 | 0,680476065 | 0,08  | 0,935854369 | 0,52  | 0,18472824  | -0,21 | 0,726563756 |
| Ndufa4   | -0,91 | 0,128482877 | -0,43 | 0,606573358 | 0,62  | 0,239971983 | -1,17 | 0,072703707 | -0,45 | 0,460621168 |
| Ndufa4l2 | -0,46 | 0,493024489 | 0,11  | 0,935984823 | 0,21  | 0,757498725 | -0,23 | 0,520731092 | 0,08  | 0,939448119 |
| Ndufa5   | -0,19 | 0,844880277 | -0,7  | 0,300832923 | 0,1   | 0,971158632 | 0,11  | 0,812625466 | -0,35 | 0,570352952 |
| Ndufa6   | 0,31  | 0,602160482 | 0,02  | 0,9860901   | -0,09 | 0,911634383 | 0,01  | 0,992722023 | 0,33  | 0,504424814 |
| Ndufa7   | 0,13  | 0,810202145 | 0     | 1           | 0,12  | 0,863043834 | -0,57 | 0,099217514 | -0,19 | 0,783490449 |
| Ndufa8   | -0,28 | 0,451391787 | -0,41 | 0,463484001 | 0,22  | 0,674349954 | 1,03  | 0,068301122 | -0,28 | 0,673120647 |
| Ndufa9   | -0,18 | 0,675857641 | -0,29 | 0,548858367 | 0,29  | 0,727879469 | 0,52  | 0,203967306 | 0,08  | 0,933307994 |
| Ndufab1  | 0,16  | 0,856118781 | -0,46 | 0,643895096 | -0,4  | 0,657277431 | 0,87  | 0,041514569 | 0,23  | 0,781172165 |
| Ndufaf1  | -0,35 | 0,572097732 | 0,14  | 0,912773944 | -0,1  | 0,957041977 | 0,05  | 0,962670023 | -0,51 | 0,48837696  |
| Ndufaf2  | -0,33 | 0,537345693 | -0,26 | 0,649001924 | 0,24  | 0,789802954 | 0,75  | 0,296855169 | 0,3   | 0,773401088 |
| Ndufaf3  | -0,33 | 0,602160482 | 0,18  | 0,753472848 | 0,34  | 0,821229302 | -1,12 | 0,040937914 | -0,43 | 0,549181666 |
| Ndufaf4  | -0,83 | 0,533055802 | -0,2  | 0,871595298 | 0,17  | 0,862892093 | 0,08  | 0,958869696 | 0,07  | 0,958068117 |

|         |       |             |       |             |       |             |       |             |       |             |
|---------|-------|-------------|-------|-------------|-------|-------------|-------|-------------|-------|-------------|
| Ndufaf5 | -0,58 | 0,269151748 | -0,23 | 0,640299669 | 0,12  | 0,904573436 | 0,38  | 0,667619249 | 0,04  | 0,979456872 |
| Ndufaf6 | -0,17 | 0,875069687 | -0,43 | 0,535950767 | 0,39  | 0,747761454 | 0,88  | 0,103334831 | 0,16  | 0,859615999 |
| Ndufaf7 | -0,47 | 0,597519827 | -0,63 | 0,3321257   | 0,29  | 0,786838878 | 0,47  | 0,533941098 | -0,13 | 0,917030581 |
| Ndufb10 | -0,06 | 0,908108677 | -0,13 | 0,853306685 | -0,05 | 0,944926347 | -0,08 | 0,849201167 | 0     | 0,997106233 |
| Ndufb2  | 0,01  | 0,991919022 | -0,56 | 0,2862434   | -0,15 | 0,90283613  | 0,75  | 0,181463543 | -0,02 | 0,985982505 |
| Ndufb3  | 0,39  | 0,596273756 | -0,4  | 0,567348676 | -0,13 | 0,954203403 | 0,15  | 0,680882954 | -0,35 | 0,553405078 |
| Ndufb5  | -0,46 | 0,218444456 | -0,24 | 0,559438931 | 0,36  | 0,456595062 | 0,15  | 0,688152796 | -0,38 | 0,4940585   |
| Ndufb6  | -0,06 | 0,93113484  | 0     | 1           | 0,33  | 0,624572073 | 0,19  | 0,686014055 | -0,09 | 0,904684159 |
| Ndufb7  | -0,05 | 0,933912196 | -0,32 | 0,526459535 | 0,13  | 0,828036964 | 0,16  | 0,733213704 | -0,03 | 0,973382116 |
| Ndufb8  | -0,26 | 0,61200942  | -0,51 | 0,448796542 | 0,7   | 0,09059546  | 0,24  | 0,720841606 | -0,1  | 0,91339829  |
| Ndufb9  | -0,05 | 0,909164786 | -0,33 | 0,466871612 | 0,62  | 0,509702247 | 0,14  | 0,721414852 | -0,06 | 0,940092696 |
| Ndufc1  | 0,42  | 0,247531815 | -0,5  | 0,494161701 | 0,44  | 0,571405665 | 0,74  | 0,074176128 | 0,3   | 0,579739537 |
| Ndufs1  | -0,82 | 0,269026142 | -0,37 | 0,807463629 | 0,37  | 0,727262258 | 0,24  | 0,864719338 | -0,17 | 0,918797466 |
| Ndufs2  | -0,18 | 0,720914253 | 0,22  | 0,748874675 | 0,41  | 0,469053827 | 0,36  | 0,727971304 | 0,18  | 0,9039404   |
| Ndufs3  | 0,07  | 0,91588836  | 0,24  | 0,589733014 | -0,09 | 0,921289719 | 0,03  | 0,966401528 | -0,05 | 0,955247021 |
| Ndufs4  | -0,3  | 0,545805455 | 0,09  | 0,882589938 | 0,23  | 0,770526999 | 0,28  | 0,627438166 | 0     | 0,99981982  |
| Ndufs6  | -0,06 | 0,904043614 | -0,29 | 0,540772465 | 0,38  | 0,537671687 | 0,16  | 0,657693842 | -0,28 | 0,608004947 |
| Ndufs7  | -0,36 | 0,589124269 | -0,43 | 0,336433977 | -0,06 | 0,957193291 | -0,25 | 0,716874043 | 0,07  | 0,951544448 |
| Ndufs8  | -0,02 | 0,972164346 | -0,24 | 0,571596794 | 0,13  | 0,878636183 | 0,29  | 0,417679727 | 0     | 0,997254437 |
| Ndufv1  | 0,01  | 0,98608257  | -0,19 | 0,852563873 | 0,58  | 0,236443692 | -0,58 | 0,266476832 | -0,26 | 0,697818445 |
| Ndufv2  | -0,3  | 0,480319644 | -0,36 | 0,492896389 | 0,72  | 0,398389729 | 0,45  | 0,462136472 | 0,35  | 0,669861917 |
| Ndufv3  | 0,15  | 0,758636946 | 0,28  | 0,666450149 | 0,27  | 0,696594185 | -0,18 | 0,814762053 | -0,17 | 0,881943508 |
| Neat1   | 0,17  | 0,763737282 | 0,51  | 0,319414606 | -0,4  | 0,688126003 | -1,23 | 0,016289737 | 0,12  | 0,869765418 |
| Neb     | -0,07 | 0,948926586 | -0,22 | 0,723339619 | -0,03 | 0,974299326 | 0,35  | 0,427854603 | 0,19  | 0,770424307 |
| Nebi    | 0,03  | 0,966775766 | 0,24  | 0,815884569 | -0,33 | 0,76370647  | -2,97 | 0,030664256 | -0,55 | 0,643580968 |
| Necab1  | -0,1  | 0,926962211 | 0,18  | 0,794407647 | -0,34 | 0,607689093 | -0,34 | 0,712649024 | -0,27 | 0,800540569 |
| Necab2  | -0,12 | 0,882943798 | 0,12  | 0,945302999 | 0,12  | 0,935168506 | -0,13 | 0,93129706  | -0,19 | 0,910083563 |
| Necab3  | 0,08  | 0,928816764 | -0,35 | 0,506403012 | 0,03  | 0,989923808 | 0,08  | 0,899914853 | 0     | 0,998164722 |
| Necap1  | 0,21  | 0,682249083 | -0,02 | 0,982786635 | -0,2  | 0,777810365 | -0,21 | 0,555880182 | -0,04 | 0,961749007 |
| Necap2  | -0,27 | 0,534017117 | -0,15 | 0,729957667 | 0,03  | 0,967930981 | 0,39  | 0,22065778  | -0,09 | 0,9039404   |
| Nedd1   | -0,38 | 0,625573018 | 0,27  | 0,638366221 | 0,66  | 0,36945384  | 0,4   | 0,416347026 | 0,03  | 0,977707446 |
| Nedd4   | -0,3  | 0,452890073 | -0,31 | 0,471225184 | 0,41  | 0,348933118 | 0,26  | 0,502210241 | -0,47 | 0,329487003 |
| Nedd4l  | 0,44  | 0,294290336 | 0,31  | 0,629493333 | -0,66 | 0,281817897 | 1,91  | 0,02040845  | 0,29  | 0,74495703  |
| Nedd8   | 0,03  | 0,961664829 | -0,19 | 0,68442935  | 0,26  | 0,601033617 | 0,7   | 0,075822599 | -0,09 | 0,915363101 |
| Nedd9   | -0,01 | 0,989929372 | 0,19  | 0,683839266 | 0,01  | 0,990836784 | -0,04 | 0,943143586 | 0,19  | 0,77360786  |



|         |       |             |       |             |       |             |       |             |       |             |
|---------|-------|-------------|-------|-------------|-------|-------------|-------|-------------|-------|-------------|
| Nefh    | -0,01 | 0,991919022 | 0,06  | 0,938044149 | 0,38  | 0,544741818 | 0,02  | 0,981976193 | -0,21 | 0,71265105  |
| Nefl    | 0,03  | 0,995150704 | -0,93 | 0,539700767 | 0,99  | 0,280958182 | 1,76  | 0,113007982 | 0,67  | 0,481873486 |
| Nefm    | 0,23  | 0,664076959 | -0,67 | 0,483436169 | -0,19 | 0,902637441 | 0,25  | 0,604532298 | 0,53  | 0,365096141 |
| Negr1   | -0,24 | 0,722588324 | -0,02 | 0,993202935 | 0,05  | 0,955586257 | -0,39 | 0,431974229 | -0,49 | 0,459738349 |
| Neil1   | -0,15 | 0,89763852  | 0,26  | 0,563746321 | 0,44  | 0,488218852 | 0,13  | 0,742865369 | -0,21 | 0,861604824 |
| Neil2   | 0,59  | 0,172698611 | 0,28  | 0,729423334 | -0,13 | 0,841563482 | -0,09 | 0,882842038 | 0,28  | 0,689405962 |
| Neil3   | -1,44 | 0,153824107 | -1,21 | 0,355342237 | 1,49  | 0,036818657 | 1,66  | 0,05727577  | -0,42 | 0,634076489 |
| Nek1    | -0,1  | 0,937536077 | -0,27 | 0,783766709 | 0,73  | 0,310107338 | -0,29 | 0,623649597 | -0,77 | 0,207567334 |
| Nek10   | 0,5   | 0,36631183  | 0,36  | 0,533804963 | -0,24 | 0,738922327 | 0,16  | 0,798746715 | 0,04  | 0,973428839 |
| Nek11   | 0,24  | 0,832947001 | -0,29 | 0,73924947  | -0,01 | 0,997394645 | 0,07  | 0,911258809 | -0,06 | 0,964210783 |
| Nek2    | -1,44 | 0,067204873 | -2,27 | 0,185367049 | 0,37  | 0,771789829 | 2,53  | 0,026493467 | 0,22  | 0,699060093 |
| Nek3    | -0,14 | 0,911800803 | -0,65 | 0,49125334  | -0,05 | 0,966647226 | 0,34  | 0,71158821  | -0,11 | 0,944318268 |
| Nek4    | 0,17  | 0,832696131 | 0,01  | 0,995205602 | -0,11 | 0,939681612 | 0,16  | 0,924520726 | -0,17 | 0,93992804  |
| Nek5    | -0,05 | 0,952453567 | 0,16  | 0,779951461 | -0,08 | 0,949858985 | 0,16  | 0,84106258  | 0,16  | 0,865258929 |
| Nek6    | -1,35 | 0,165636908 | -0,44 | 0,740517638 | 0,68  | 0,321784919 | 1,6   | 0,069296637 | 0,68  | 0,322519045 |
| Nek7    | 0,42  | 0,482077988 | 0,24  | 0,724196236 | -0,21 | 0,706714392 | -0,72 | 0,193331129 | -0,42 | 0,566837145 |
| Nek8    | 0,01  | 0,993728727 | 0,07  | 0,898998198 | 0,14  | 0,888921789 | -0,41 | 0,621810528 | -0,69 | 0,432621109 |
| Nek9    | -0,08 | 0,877498793 | 0,21  | 0,740471889 | 0,24  | 0,790112485 | -0,38 | 0,401576612 | -0,08 | 0,928724353 |
| Nelfa   | -0,13 | 0,839118329 | 0,03  | 0,982445512 | 0,51  | 0,490364869 | -0,06 | 0,942956756 | -0,04 | 0,969617491 |
| Nelfb   | -0,39 | 0,321600657 | 0,14  | 0,88325516  | 0,07  | 0,940489823 | -0,86 | 0,102034118 | -0,29 | 0,635285358 |
| Nelfcd  | -0,73 | 0,163088889 | -0,31 | 0,722000016 | 0,51  | 0,387362229 | 0,24  | 0,685871999 | -0,19 | 0,813308036 |
| Nelfe   | -0,1  | 0,883923631 | -0,42 | 0,530022884 | 0,83  | 0,343594254 | 0,22  | 0,818508845 | 0,01  | 0,996614425 |
| Nell1   | -0,1  | 0,8634587   | -0,39 | 0,568727254 | -0,3  | 0,641775458 | -0,15 | 0,855893295 | 0,03  | 0,982214841 |
| Nell1os | 0,23  | 0,761457464 | 0,25  | 0,733180951 | -0,02 | 0,980447951 | -0,31 | 0,448674441 | -0,05 | 0,956702425 |
| Nell2   | 0,04  | 0,953248189 | 0,06  | 0,927205716 | -0,25 | 0,672766751 | 0,17  | 0,691668858 | 0,13  | 0,864049783 |
| Nemf    | 0,01  | 0,996219097 | -0,11 | 0,889814333 | 0,07  | 0,958214619 | -0,09 | 0,910189972 | 0,25  | 0,736245281 |
| Nenf    | 0,07  | 0,885453601 | -0,26 | 0,732044571 | 0,3   | 0,669784548 | -0,66 | 0,216247016 | -0,28 | 0,652073004 |
| Neo1    | -0,25 | 0,785400637 | 0,25  | 0,881574142 | -0,56 | 0,361580981 | -4,29 | 0,007738248 | -0,32 | 0,642152163 |
| Nepn    | 0,2   | 0,778869381 | -0,1  | 0,903504389 | 0,73  | 0,478722042 | -0,14 | 0,911183081 | -0,46 | 0,743854135 |
| Nepro   | -0,01 | 0,993175772 | 0,14  | 0,823246376 | 0,22  | 0,821229302 | 0,76  | 0,287155061 | 0,05  | 0,977775233 |
| Nes     | -1,04 | 0,067448638 | -0,91 | 0,22001825  | 0,99  | 0,15569544  | 1,2   | 0,045013657 | -0,68 | 0,502676586 |
| Nespas  | -0,09 | 0,870052902 | -0,15 | 0,883093763 | 0,55  | 0,425721333 | 0,08  | 0,92319561  | -0,09 | 0,901132475 |
| Net1    | 1,04  | 0,040159246 | 0,65  | 0,551515746 | 0,17  | 0,867580642 | -1,55 | 0,090476062 | -1,1  | 0,153221475 |
| Neto1   | -0,02 | 0,987965359 | 0,4   | 0,666285906 | -0,06 | 0,964708966 | -0,75 | 0,100526573 | -0,15 | 0,860939346 |
| Neto2   | 1,12  | 0,356134523 | 0,57  | 0,514228058 | -0,2  | 0,925904075 | 1,56  | 0,019004226 | 1,38  | 0,251749668 |

|          |       |             |       |             |       |             |       |             |       |             |
|----------|-------|-------------|-------|-------------|-------|-------------|-------|-------------|-------|-------------|
| Neu1     | -0,29 | 0,421957622 | -0,41 | 0,548547402 | 0,54  | 0,25964678  | 1,12  | 0,021666564 | -0,1  | 0,936356012 |
| Neu2     | 0,46  | 0,461113298 | 0,86  | 0,336433977 | 0,38  | 0,645611751 | -0,68 | 0,207674182 | -0,09 | 0,950211199 |
| Neu3     | 0,17  | 0,859085937 | 0,21  | 0,670859269 | 0     | 0,999329448 | -0,36 | 0,466887908 | 0,13  | 0,864166878 |
| Neu4     | 0,15  | 0,72037137  | 0,02  | 0,98459889  | -0,31 | 0,628427952 | 0,16  | 0,710724384 | -0,02 | 0,985269236 |
| Neur1a   | 0,09  | 0,886889675 | 0,16  | 0,702804107 | -0,28 | 0,704777249 | -0,26 | 0,637125181 | -0,12 | 0,872242794 |
| Neur1b   | -0,6  | 0,15548842  | -0,66 | 0,158696948 | 0,39  | 0,486238146 | -0,93 | 0,03784406  | -0,7  | 0,176186731 |
| Neur2    | 0,06  | 0,946485591 | -0,31 | 0,571092292 | -0,39 | 0,529358236 | -0,49 | 0,397361621 | -0,22 | 0,823098095 |
| Neur3    | 0,6   | 0,206808472 | 0,72  | 0,110965122 | -1,15 | 0,103030088 | 0,57  | 0,151857581 | 1,21  | 0,043177854 |
| Neur4    | -0,21 | 0,720132176 | -0,28 | 0,593351321 | 1,02  | 0,174607192 | 0,13  | 0,841354324 | -0,03 | 0,980945466 |
| Neurod1  | -0,14 | 0,845137004 | -0,09 | 0,911073186 | 0,26  | 0,640924712 | 0,23  | 0,627089222 | -0,17 | 0,811321326 |
| Neurod2  | 0,05  | 0,94881239  | 0,28  | 0,667170465 | -0,1  | 0,925195648 | -0,16 | 0,818693228 | 0,26  | 0,727904814 |
| Neurod4  | 0,02  | 0,984759626 | 0,39  | 0,466238885 | 0,06  | 0,938771378 | -0,15 | 0,79072772  | 0,32  | 0,720742956 |
| Neurod6  | 0,36  | 0,657723995 | -0,02 | 0,994137877 | -0,02 | 0,983471086 | 0,3   | 0,476414891 | -0,11 | 0,870978345 |
| Neurog1  | 0,08  | 0,895400682 | 0,03  | 0,969571841 | -0,12 | 0,874098993 | -0,08 | 0,850199995 | 0,25  | 0,719978183 |
| Neurog2  | -0,12 | 0,834881357 | 0,09  | 0,840275737 | -0,2  | 0,80210446  | 0     | 0,996122468 | -0,14 | 0,819497528 |
| Neurog3  | -0,11 | 0,859630951 | -0,08 | 0,901000778 | -0,3  | 0,635864143 | 0,18  | 0,742706747 | -0,01 | 0,994659783 |
| Nexn     | -0,84 | 0,120917879 | -0,67 | 0,638366221 | 0,06  | 0,981207238 | -0,24 | 0,910298592 | 0,08  | 0,973428839 |
| Nf1      | -0,15 | 0,757940032 | -0,13 | 0,864680059 | 0,25  | 0,794194778 | 0,22  | 0,65865291  | -0,4  | 0,464702845 |
| Nf2      | -0,4  | 0,689253784 | -0,24 | 0,639419375 | 0,31  | 0,835677021 | -0,2  | 0,735319346 | -0,43 | 0,583434544 |
| Nfam1    | -0,35 | 0,465168175 | -0,19 | 0,714236324 | 0,11  | 0,855523214 | 0,04  | 0,922740736 | 0,08  | 0,926008345 |
| Nfasc    | -0,3  | 0,677288845 | -0,09 | 0,925569254 | 0,08  | 0,951341744 | 0,05  | 0,945953123 | -0,19 | 0,808285534 |
| Nfat5    | 0,58  | 0,185970906 | 0,25  | 0,595141091 | -0,41 | 0,591404136 | -1,19 | 0,036323079 | 0,02  | 0,983617617 |
| Nfatc1   | -0,35 | 0,587950799 | -0,25 | 0,493903579 | -0,26 | 0,830336321 | -0,33 | 0,39058196  | -0,38 | 0,505456212 |
| Nfatc2   | 0,19  | 0,801627644 | 0,03  | 0,969481475 | -0,17 | 0,764615262 | -0,62 | 0,499830978 | -0,17 | 0,904684159 |
| Nfatc2ip | 0,2   | 0,864400092 | -1,25 | 0,104457339 | -0,47 | 0,693800251 | 0,54  | 0,702534189 | -1    | 0,419557334 |
| Nfatc3   | -0,53 | 0,217479741 | -0,11 | 0,864680059 | 0,15  | 0,776071062 | 0,06  | 0,948141338 | 0,02  | 0,983469081 |
| Nfatc4   | -0,32 | 0,549420541 | -0,05 | 0,981586987 | -0,1  | 0,925417014 | 0,96  | 0,045809254 | 0,04  | 0,97425848  |
| Nfe2     | -0,08 | 0,937251448 | -0,44 | 0,669382909 | 0,44  | 0,640143961 | 0,53  | 0,372019075 | 0,33  | 0,777805633 |
| Nfe2l1   | -0,07 | 0,879080828 | 0,04  | 0,94248518  | 0,17  | 0,727262258 | -0,38 | 0,229189997 | 0,18  | 0,76521225  |
| Nfe2l2   | 0,57  | 0,126131792 | 0,46  | 0,390751508 | -0,54 | 0,251575717 | -0,15 | 0,721399537 | 0,46  | 0,410369443 |
| Nfe2l3   | 0,52  | 0,534017117 | 0,29  | 0,527554794 | 0,59  | 0,332087275 | -0,1  | 0,778212842 | 0,47  | 0,444753614 |
| Nfia     | -0,48 | 0,419591944 | -0,57 | 0,257798121 | -0,14 | 0,837999835 | -0,01 | 0,992906132 | -0,88 | 0,066861241 |
| Nfib     | -0,05 | 0,927556766 | 0,14  | 0,786074087 | -0,08 | 0,913333366 | -0,07 | 0,876232748 | -0,19 | 0,726687847 |
| Nfic     | -0,47 | 0,387519736 | -0,4  | 0,586721336 | 0,44  | 0,333179926 | -0,52 | 0,391970556 | -0,78 | 0,395115041 |
| Nfil3    | -0,04 | 0,948926586 | 0,13  | 0,820550413 | 0,06  | 0,949039966 | 0,14  | 0,871321071 | 0,4   | 0,581802025 |

|         |       |             |       |             |       |             |       |             |       |             |
|---------|-------|-------------|-------|-------------|-------|-------------|-------|-------------|-------|-------------|
| Nfix    | -0,26 | 0,757751953 | -0,03 | 0,973945454 | -0,19 | 0,725191296 | -0,81 | 0,139893446 | 0,24  | 0,777223566 |
| Nfkb1   | 0,08  | 0,886741208 | -0,27 | 0,622191337 | 0,31  | 0,649684246 | 0,94  | 0,19225115  | 0,26  | 0,817563348 |
| Nfkb2   | 0,36  | 0,425285092 | 0,35  | 0,62432723  | 0,64  | 0,087990365 | 0,06  | 0,929835301 | 0,37  | 0,467900814 |
| Nfkbia  | 0,1   | 0,80226019  | 0,1   | 0,847821325 | -0,06 | 0,930645703 | 0,32  | 0,335213853 | 0,01  | 0,991980521 |
| Nfkbib  | 0,48  | 0,302543544 | 0,36  | 0,668839557 | 0,15  | 0,800107725 | 0,63  | 0,297270546 | 0,3   | 0,616680786 |
| Nfkbid  | -0,13 | 0,849354728 | 0,16  | 0,882589938 | -0,01 | 0,996596939 | 1,14  | 0,057045858 | 0,35  | 0,694233384 |
| Nfkbie  | 0,3   | 0,554519131 | 0,54  | 0,425298758 | -0,02 | 0,987356432 | 1,2   | 0,138140977 | 0,29  | 0,806649799 |
| Nfkbil1 | 0,26  | 0,50199908  | 0,27  | 0,643955364 | 0,02  | 0,979788785 | -0,57 | 0,119435416 | -0,15 | 0,890957032 |
| Nfkbiz  | 0,4   | 0,327334001 | 0,06  | 0,912137323 | -0,1  | 0,904132011 | 0,22  | 0,502488051 | -0,24 | 0,731527639 |
| Nfrkb   | -0,29 | 0,598455864 | 0,37  | 0,423104914 | 0,12  | 0,885042765 | -0,63 | 0,085369647 | -0,11 | 0,894114383 |
| Nfs1    | -0,54 | 0,218444456 | -0,73 | 0,233915389 | 0,17  | 0,832155972 | 0,45  | 0,378311377 | -0,62 | 0,360726287 |
| Nfu1    | 0,02  | 0,979827119 | -0,15 | 0,855632384 | -0,01 | 0,991168026 | -0,1  | 0,812468015 | 0,01  | 0,992406971 |
| Nfx1    | 0,01  | 0,991919022 | -0,4  | 0,615288453 | 0,87  | 0,215124832 | -0,32 | 0,4272539   | -0,33 | 0,595752354 |
| Nfxl1   | -0,06 | 0,939061259 | 0,2   | 0,73274163  | 0,23  | 0,621385343 | 0,41  | 0,536277668 | -0,22 | 0,838679773 |
| Nfya    | -0,15 | 0,808572184 | -0,02 | 0,985148348 | -0,1  | 0,921956183 | -0,25 | 0,429257441 | 0,1   | 0,892323536 |
| Nfyb    | 1,01  | 0,180356049 | 0,79  | 0,345409693 | -0,56 | 0,38497941  | 0,29  | 0,75887854  | 0,36  | 0,752900829 |
| Nfyc    | -0,16 | 0,702001327 | -0,07 | 0,89081665  | 0,94  | 0,049478856 | -0,27 | 0,660266809 | -0,28 | 0,68987325  |
| Ngb     | 0,4   | 0,51624727  | -0,13 | 0,862723152 | 0,09  | 0,932706021 | -0,52 | 0,153265608 | -0,44 | 0,626176831 |
| Ngdn    | 0,21  | 0,673291416 | 0,27  | 0,727706787 | 0,12  | 0,91821779  | -0,18 | 0,739085734 | 0,27  | 0,630151021 |
| Ngef    | 0,06  | 0,929634271 | -0,33 | 0,462039435 | 0,32  | 0,690924502 | 0,34  | 0,71158821  | 0,03  | 0,982175252 |
| Ngf     | 0,3   | 0,68194299  | -0,09 | 0,936414321 | 0,67  | 0,490489841 | -0,44 | 0,406444051 | 0,06  | 0,97007243  |
| Ngfr    | -0,6  | 0,322548968 | -0,56 | 0,565680897 | 0     | 0,997816755 | -0,08 | 0,943202107 | -0,48 | 0,567199217 |
| Ngfrap1 | -1,17 | 0,078114626 | -0,59 | 0,414206292 | 0,71  | 0,264885341 | -0,99 | 0,087185242 | 0,31  | 0,575004207 |
| Ngly1   | -0,97 | 0,470268363 | -0,04 | 0,959685428 | 0,16  | 0,840824939 | -0,38 | 0,48505774  | 0,25  | 0,729208209 |
| Ngp     | 0,09  | 0,882027826 | -0,25 | 0,768164691 | -0,01 | 0,996265665 | 0,03  | 0,979921753 | 0,21  | 0,845142293 |
| Ngrn    | 0,28  | 0,68161851  | -0,25 | 0,583200444 | 0,27  | 0,636722883 | -0,59 | 0,162281276 | -0,16 | 0,858872204 |
| Nhej1   | -0,04 | 0,970938013 | -0,08 | 0,931316337 | 0,32  | 0,736129949 | 0,03  | 0,967700716 | -0,33 | 0,726042963 |
| Nhlh1   | 0,25  | 0,808555679 | 0,16  | 0,873628464 | -0,01 | 0,995401448 | -0,28 | 0,5076326   | 0,34  | 0,594109073 |
| Nhlh2   | -0,29 | 0,701086418 | -0,05 | 0,935264186 | -0,38 | 0,465081447 | 0,22  | 0,718299331 | 0,23  | 0,784375319 |
| Nhlrc1  | 0,2   | 0,687662951 | 0,04  | 0,958663163 | -0,23 | 0,683633656 | -0,93 | 0,041009258 | -0,44 | 0,443096537 |
| Nhlrc2  | -0,08 | 0,921652597 | 0,24  | 0,653910717 | -0,08 | 0,929272323 | 0,11  | 0,835175707 | 0,64  | 0,219224272 |
| Nhlrc3  | -0,2  | 0,74764092  | -0,28 | 0,756514853 | 0,19  | 0,804910036 | -0,26 | 0,61728308  | -0,61 | 0,268549885 |
| Nhlrc4  | 0,37  | 0,619127292 | 0,17  | 0,801259805 | -0,52 | 0,476920529 | 0,12  | 0,87148686  | -0,06 | 0,954316248 |
| Nhp2    | -0,72 | 0,090466364 | -0,9  | 0,127301007 | 0,77  | 0,406974641 | 1,56  | 0,031624209 | -0,2  | 0,854602258 |
| Nhs     | -0,18 | 0,894895846 | -0,23 | 0,86410431  | 0,48  | 0,615919792 | -0,14 | 0,908650462 | -0,58 | 0,581802025 |

|           |       |             |       |             |       |             |       |             |       |             |
|-----------|-------|-------------|-------|-------------|-------|-------------|-------|-------------|-------|-------------|
| Nhsl1     | -0,51 | 0,412575527 | 0     | 1           | -0,12 | 0,877595489 | 0,59  | 0,323769642 | 0,35  | 0,536721752 |
| Nhsl2     | -0,95 | 0,074890017 | -0,15 | 0,845501595 | 0,03  | 0,986800862 | -0,42 | 0,414522125 | 0,06  | 0,956236782 |
| Nicn1     | -0,26 | 0,751456663 | -0,1  | 0,861080951 | 0,15  | 0,894339966 | 0,13  | 0,917470015 | -0,59 | 0,545166604 |
| Nid1      | -0,07 | 0,907391935 | -0,09 | 0,879407921 | 0,14  | 0,813164746 | 1,08  | 0,101239783 | -0,22 | 0,80577425  |
| Nid2      | -0,14 | 0,714149667 | -0,39 | 0,393855735 | 0,83  | 0,189146758 | 2,52  | 0,003907268 | -1,48 | 0,008397664 |
| Nif3l1    | -0,35 | 0,705173108 | -0,13 | 0,842793123 | 0,72  | 0,310532869 | 0,44  | 0,424340428 | -0,35 | 0,574285481 |
| Nifk      | -0,42 | 0,542181894 | -0,02 | 0,972706967 | -0,07 | 0,969928932 | 0,52  | 0,43636337  | 0,15  | 0,892918473 |
| Nim1k     | -0,16 | 0,832696131 | 0,01  | 0,988548122 | -0,16 | 0,811424918 | -0,24 | 0,896599656 | -0,21 | 0,929780699 |
| Nin       | -0,58 | 0,296574182 | -0,16 | 0,783325809 | -0,11 | 0,907367497 | 0,62  | 0,213326074 | -0,24 | 0,755594746 |
| Ninj1     | 1,06  | 0,05233783  | 0,77  | 0,137320562 | -0,44 | 0,417521901 | 0,44  | 0,203390007 | 0,5   | 0,268285808 |
| Ninj2     | -0,22 | 0,701624105 | 0,09  | 0,87704132  | -0,21 | 0,801493291 | -0,21 | 0,637464586 | -0,09 | 0,914960168 |
| Ninl      | -0,01 | 0,991919022 | 0,01  | 0,994486533 | 0,26  | 0,613380041 | -0,17 | 0,907406741 | 0,39  | 0,787326817 |
| Nip7      | -0,11 | 0,848801106 | 0,17  | 0,803283255 | 0,46  | 0,443039118 | 0,36  | 0,551811973 | 0,24  | 0,78532501  |
| Nipa1     | -1,56 | 0,097625832 | -0,14 | 0,895853001 | 0,19  | 0,917981605 | 0,85  | 0,506357609 | -0,15 | 0,945172819 |
| Nipa2     | 0,44  | 0,414712434 | 0,25  | 0,702517334 | -0,15 | 0,905653378 | 0,15  | 0,805169421 | 0,05  | 0,973428839 |
| Nipal1    | 1,94  | 0,180356049 | -0,04 | 0,993789602 | 0,08  | 0,968638834 | 0,32  | 0,742693508 | -1,3  | 0,20482955  |
| Nipal2    | 0,17  | 0,714793039 | 0,18  | 0,880473303 | -0,53 | 0,420043356 | -3,01 | 0,011245132 | 0,28  | 0,777561251 |
| Nipal3    | -0,28 | 0,644052936 | -0,25 | 0,760291843 | -0,39 | 0,464639399 | -1,1  | 0,070650676 | -0,82 | 0,158817444 |
| Nipal4    | -0,18 | 0,772692695 | 0,12  | 0,864680059 | 0,54  | 0,404120029 | -0,42 | 0,375005988 | -0,18 | 0,816652525 |
| Nipbl     | 0,23  | 0,642618049 | 0,18  | 0,765325717 | -0,06 | 0,940489823 | -0,22 | 0,726287112 | 0,05  | 0,957620856 |
| Nipsnap1  | -0,55 | 0,307022402 | -0,15 | 0,783858612 | 0,22  | 0,79678698  | -0,43 | 0,339924361 | -0,16 | 0,833369653 |
| Nipsnap3a | -0,02 | 0,988867445 | -0,23 | 0,73623784  | -0,11 | 0,911506558 | 0,03  | 0,955434247 | 0,39  | 0,429112259 |
| Nipsnap3b | 0,35  | 0,533013647 | 0,09  | 0,912535732 | -0,24 | 0,81590485  | 0,38  | 0,486912097 | 0,6   | 0,419557334 |
| Nisch     | -0,59 | 0,179001759 | -0,42 | 0,325242663 | 0,47  | 0,243865866 | 0,17  | 0,640127733 | -0,33 | 0,554975763 |
| Nit1      | 0,17  | 0,799649902 | -0,17 | 0,722766419 | 0,15  | 0,825451037 | -0,2  | 0,850580657 | -0,72 | 0,488165064 |
| Nit2      | -0,66 | 0,235549559 | -0,34 | 0,59780175  | 0,7   | 0,340914728 | 0,31  | 0,557232733 | -0,65 | 0,314909475 |
| Nkain1    | 0     | 0,999536558 | -0,78 | 0,334769294 | -0,26 | 0,757498725 | 0,62  | 0,291566387 | 0,14  | 0,864049783 |
| Nkain2    | -0,22 | 0,572552292 | 0,08  | 0,906267371 | 0,07  | 0,933652093 | -0,25 | 0,606590988 | 0,15  | 0,890957032 |
| Nkain3    | 0,16  | 0,758721455 | 0,3   | 0,610325553 | -0,22 | 0,784734693 | 0,04  | 0,967866794 | 0,02  | 0,980945466 |
| Nkain4    | -0,62 | 0,259797168 | -0,4  | 0,738199172 | -0,01 | 0,997394645 | 0,4   | 0,420602926 | 0,05  | 0,962525821 |
| Nkap      | -0,23 | 0,61379872  | -0,29 | 0,802615172 | 0,57  | 0,391889599 | 0,3   | 0,633460546 | 0,23  | 0,694233384 |
| Nkapl     | 0,03  | 0,963329626 | 0,1   | 0,913318606 | -0,12 | 0,908400411 | 0,18  | 0,83280418  | -0,04 | 0,973428839 |
| Nkd1      | 0,03  | 0,976574175 | 0,51  | 0,656294004 | -0,36 | 0,675674731 | -2,71 | 0,008820271 | -0,39 | 0,569349136 |
| Nkd2      | -0,19 | 0,84900712  | -0,93 | 0,180045682 | -0,09 | 0,971467554 | -0,75 | 0,079554516 | -1,21 | 0,064977434 |
| Nkg7      | 0,09  | 0,936139343 | 0,3   | 0,667502888 | -1,17 | 0,473305474 | -0,84 | 0,509595024 | -0,57 | 0,72846861  |

|           |       |             |       |             |       |             |       |             |       |             |
|-----------|-------|-------------|-------|-------------|-------|-------------|-------|-------------|-------|-------------|
| Nkiras1   | 0,04  | 0,965444591 | -0,05 | 0,962028658 | -0,16 | 0,926182797 | -0,71 | 0,471405206 | -0,16 | 0,91314596  |
| Nkiras2   | -0,38 | 0,504621759 | 0,12  | 0,811472247 | 0,33  | 0,530264141 | 0,27  | 0,482483122 | -0,52 | 0,469594536 |
| Nkpd1     | -0,42 | 0,576879913 | 0,19  | 0,84314495  | -0,23 | 0,82104737  | -0,31 | 0,572579421 | -0,99 | 0,176186731 |
| Nkrf      | 0,15  | 0,798227708 | -0,19 | 0,767178812 | 0,31  | 0,649994979 | 0,16  | 0,702534189 | 0,01  | 0,986436695 |
| Nktr      | 0,68  | 0,218614193 | 0,25  | 0,51915071  | 0,33  | 0,544423132 | 0,62  | 0,173791764 | 0,55  | 0,510444912 |
| Nkx1-1    | 0     | 0,995778597 | -0,02 | 0,968437059 | -0,23 | 0,66678261  | 0,12  | 0,779547737 | 0     | 0,995225573 |
| Nkx1-2    | 0,14  | 0,856967468 | -0,21 | 0,703291096 | -0,45 | 0,37686469  | -0,03 | 0,953222061 | 0,17  | 0,805931558 |
| Nkx2-1    | 0,07  | 0,935644409 | -0,14 | 0,824113739 | 0     | 0,998479656 | 0,16  | 0,653400029 | 0,26  | 0,712786855 |
| Nkx2-2    | 0,01  | 0,996925522 | 0,15  | 0,79295936  | -0,08 | 0,923520317 | 0,14  | 0,771294754 | -0,37 | 0,525018839 |
| Nkx2-2os  | 0,1   | 0,832696131 | -0,06 | 0,901606646 | -0,08 | 0,903942509 | 0,03  | 0,941751062 | 0,05  | 0,959573673 |
| Nkx2-3    | -0,19 | 0,664953069 | 0,23  | 0,787375724 | 0,1   | 0,884153879 | -0,05 | 0,910298592 | -0,31 | 0,758052028 |
| Nkx2-4    | 0,11  | 0,797266879 | -0,1  | 0,828818891 | -0,12 | 0,843091338 | 0,66  | 0,178171251 | 0,17  | 0,836061657 |
| Nkx2-5    | 0,01  | 0,993728727 | 0,2   | 0,640299669 | -0,31 | 0,549446867 | 0,17  | 0,676740124 | -0,03 | 0,968130547 |
| Nkx2-6    | 0,02  | 0,972682121 | -0,12 | 0,807175471 | 0,15  | 0,811480974 | 0,17  | 0,669860197 | -0,01 | 0,992406971 |
| Nkx2-9    | 0     | 0,999288019 | 0,08  | 0,907681039 | -0,28 | 0,702689055 | 0,06  | 0,942235848 | -0,05 | 0,973576804 |
| Nkx3-1    | 0,39  | 0,406117675 | 0,02  | 0,982047684 | -0,03 | 0,973641476 | 0,07  | 0,908141892 | 0,32  | 0,659217962 |
| Nkx3-2    | -0,17 | 0,679920047 | 0,83  | 0,500152819 | 0,05  | 0,963199274 | -0,62 | 0,371941457 | -0,02 | 0,98384409  |
| Nkx6-1    | 0,24  | 0,742013855 | -0,08 | 0,932292974 | -0,34 | 0,506222058 | 0,29  | 0,577819078 | 0,11  | 0,874829878 |
| Nkx6-2    | -0,26 | 0,723283046 | -0,42 | 0,371450754 | -0,02 | 0,990836784 | 0,18  | 0,591821065 | -0,34 | 0,633532362 |
| Nkx6-3    | 0,35  | 0,482077988 | -0,05 | 0,934294134 | -0,46 | 0,471873683 | -0,22 | 0,704336934 | -0,05 | 0,961764923 |
| Nle1      | -0,5  | 0,378598836 | -0,59 | 0,360324171 | -0,02 | 0,991568687 | 1     | 0,137576047 | 0,57  | 0,450944522 |
| Nlgn1     | -0,22 | 0,791295946 | -0,21 | 0,689538166 | 0,14  | 0,867543859 | -0,7  | 0,706619788 | -0,2  | 0,945291688 |
| Nlgn2     | 0,2   | 0,792313188 | 0,29  | 0,842953835 | 0     | 0,997220401 | -0,02 | 0,985643296 | 0,19  | 0,831446445 |
| Nlgn3     | 0,45  | 0,496123406 | 0,24  | 0,582741439 | -0,92 | 0,190867064 | 0,05  | 0,958492887 | 0,37  | 0,642726581 |
| Nlk       | -0,17 | 0,67806773  | -0,18 | 0,710407859 | -0,18 | 0,736837174 | -0,2  | 0,69271453  | -0,29 | 0,634425115 |
| Nln       | -0,74 | 0,214430522 | -0,65 | 0,319029651 | 1,02  | 0,097897304 | 0,86  | 0,278115967 | -0,04 | 0,979392852 |
| Nlrc3     | -0,86 | 0,135369075 | -0,32 | 0,459417799 | -0,1  | 0,953975807 | -1,51 | 0,129997694 | -0,72 | 0,464042598 |
| Nlrc4     | 0,29  | 0,610509826 | 0,3   | 0,701492683 | -0,22 | 0,757498725 | -0,31 | 0,690442683 | 0,32  | 0,702993783 |
| Nlrc5     | 1,43  | 0,29103869  | 0,87  | 0,212383403 | -1,96 | 0,04780109  | 0,49  | 0,178527394 | 1,77  | 0,003905995 |
| Nlrp10    | 0,3   | 0,567790521 | -0,45 | 0,495197335 | -0,15 | 0,856605654 | 0,3   | 0,378102359 | 0,11  | 0,919867638 |
| Nlrp12    | 0     | 0,999288019 | -0,2  | 0,851208256 | -0,29 | 0,521989794 | 0,37  | 0,593121153 | 0,23  | 0,792305774 |
| Nlrp14    | -0,29 | 0,583196213 | 0,1   | 0,89081665  | 0,1   | 0,890571906 | -0,09 | 0,92198699  | -0,23 | 0,822398711 |
| Nlrp1a    | 0,37  | 0,436489637 | 0,72  | 0,274017201 | -0,08 | 0,920977084 | 0,09  | 0,896599656 | 0,28  | 0,704271976 |
| Nlrp1b    | -0,9  | 0,311456005 | -0,66 | 0,421936856 | -0,68 | 0,300988698 | 1,67  | 0,010955025 | 0,48  | 0,408409206 |
| Nlrp1c-ps | 0,94  | 0,095735816 | 0,37  | 0,793603525 | -0,21 | 0,807814716 | 0,25  | 0,864379203 | 0,1   | 0,954657649 |

|          |       |             |       |             |       |             |       |             |       |             |
|----------|-------|-------------|-------|-------------|-------|-------------|-------|-------------|-------|-------------|
| Nlrp2    | -0,09 | 0,897717279 | 0,27  | 0,851610126 | -0,11 | 0,909963525 | -0,05 | 0,967866794 | 0,39  | 0,695702232 |
| Nlrp3    | 1,31  | 0,187868882 | 0,22  | 0,907169389 | 0,31  | 0,911894304 | 0,06  | 0,94809223  | -0,21 | 0,761747464 |
| Nlrp4a   | 0,57  | 0,470166881 | 0,63  | 0,475138071 | 0,09  | 0,943788892 | 0,04  | 0,963752888 | 0,66  | 0,276728769 |
| Nlrp4b   | -0,14 | 0,825189239 | 0,07  | 0,926157704 | -0,05 | 0,967767582 | 0,79  | 0,100595567 | 0,53  | 0,472549193 |
| Nlrp4c   | 0     | 0,999075529 | -0,05 | 0,975836193 | -0,01 | 0,997220401 | -0,03 | 0,97407078  | -0,17 | 0,863496792 |
| Nlrp4d   | 0,34  | 0,468111704 | -0,86 | 0,487582623 | -0,45 | 0,407493525 | 1,05  | 0,020656468 | -0,37 | 0,418498045 |
| Nlrp4e   | -0,09 | 0,898603809 | -0,09 | 0,837500541 | 0,05  | 0,953292736 | -0,02 | 0,971140825 | 0,09  | 0,917844354 |
| Nlrp4f   | 0,16  | 0,764824121 | -0,16 | 0,818597532 | -0,2  | 0,703278679 | 0,08  | 0,906288885 | 0,13  | 0,865258929 |
| Nlrp4g   | 0,05  | 0,934675994 | 0,04  | 0,989873399 | -0,33 | 0,530318769 | 0,81  | 0,059380043 | 0,08  | 0,91824793  |
| Nlrp5    | 0,1   | 0,94727537  | 0,09  | 0,956441911 | -0,38 | 0,525102597 | -0,15 | 0,899143669 | 0,07  | 0,960313057 |
| Nlrp5-ps | 0,07  | 0,920050311 | 0,27  | 0,702517334 | 0,03  | 0,97868016  | 0,11  | 0,914472048 | 0,08  | 0,969493522 |
| Nlrp6    | -0,15 | 0,778869381 | 0,23  | 0,702517334 | -0,08 | 0,916273517 | 0,31  | 0,662901576 | 0,56  | 0,503166372 |
| Nlrp9b   | -0,05 | 0,937251448 | -0,23 | 0,801259805 | 0,13  | 0,904132011 | 0,58  | 0,152658168 | 0,13  | 0,845218636 |
| Nlrp9c   | 0,06  | 0,959044734 | 0,27  | 0,822383509 | -0,43 | 0,654525069 | -0,58 | 0,636916558 | -0,1  | 0,956610289 |
| Nlrp1    | -0,11 | 0,867243066 | -0,05 | 0,954443581 | 0,16  | 0,804607903 | 0,07  | 0,921588853 | -0,51 | 0,377059128 |
| Nmb      | -0,05 | 0,929279372 | -0,23 | 0,824372931 | -0,26 | 0,747599709 | -1,14 | 0,05821937  | 0,11  | 0,917844354 |
| Nmbr     | -0,61 | 0,386767705 | -0,11 | 0,916822926 | -0,48 | 0,323246778 | -0,02 | 0,987801512 | 0,41  | 0,752187547 |
| Nmd3     | -0,27 | 0,476494431 | -0,16 | 0,729741948 | 0,27  | 0,734556263 | 0,55  | 0,183467781 | -0,06 | 0,943668392 |
| Nme1     | -0,85 | 0,040453389 | -0,83 | 0,16121328  | 0,79  | 0,213394981 | 1,62  | 0,007919254 | 0,06  | 0,940092696 |
| Nme2     | -0,1  | 0,869565514 | -0,01 | 0,987777411 | 0,54  | 0,397813485 | 0,56  | 0,209491757 | 0,2   | 0,823098095 |
| Nme3     | -0,19 | 0,646878637 | -0,1  | 0,890136254 | -0,24 | 0,64473731  | -1,23 | 0,051116277 | -0,38 | 0,645147928 |
| Nme4     | -0,39 | 0,357054834 | -0,79 | 0,297762088 | 0,06  | 0,964880285 | 0,94  | 0,060016564 | -0,35 | 0,642726581 |
| Nme5     | -0,63 | 0,374743123 | 0,79  | 0,24128832  | -0,41 | 0,498349888 | -0,21 | 0,824364287 | 0,2   | 0,878966527 |
| Nme6     | -0,12 | 0,892823025 | -0,05 | 0,929289366 | -0,15 | 0,923520317 | 1,1   | 0,301563821 | 0,45  | 0,734821787 |
| Nme7     | -0,04 | 0,973588139 | -0,79 | 0,26375548  | 0,7   | 0,491914817 | 1,16  | 0,309045551 | -0,45 | 0,756418986 |
| Nme8     | -0,38 | 0,597519827 | 0,21  | 0,748605628 | -0,38 | 0,338363811 | -0,04 | 0,938757128 | 0,49  | 0,266985815 |
| Nme9     | -0,14 | 0,882500171 | -0,11 | 0,859816636 | 0     | 0,998479176 | -0,07 | 0,903739255 | -0,07 | 0,950056013 |
| Nmi      | 0,21  | 0,74672311  | 0,53  | 0,22916385  | -0,28 | 0,758284898 | -0,12 | 0,784300926 | 1,24  | 0,015930394 |
| Nmnat1   | -0,46 | 0,584008829 | -0,14 | 0,946599376 | -0,06 | 0,963199274 | 0,09  | 0,916072825 | -0,01 | 0,993993357 |
| Nmnat2   | -0,74 | 0,193168062 | -0,32 | 0,708684603 | 0,02  | 0,978255748 | -0,08 | 0,899003207 | -0,62 | 0,575912277 |
| Nmnat3   | -0,16 | 0,897614401 | 0,24  | 0,789051952 | 0,09  | 0,940056885 | -0,47 | 0,514778253 | 0,05  | 0,969937563 |
| Nmral1   | 0,03  | 0,973805829 | -0,22 | 0,87892334  | 0,51  | 0,538341146 | 0,99  | 0,273752732 | 0,69  | 0,193377099 |
| Nmrk1    | 0,31  | 0,673568684 | -0,02 | 0,985764487 | -0,49 | 0,792016423 | -0,91 | 0,095758742 | 0,23  | 0,800540569 |
| Nmrk2    | 0,01  | 0,993728727 | 0,13  | 0,899624796 | 0,02  | 0,986912078 | -0,19 | 0,830504843 | -0,56 | 0,210961795 |
| Nms      | -0,08 | 0,932551784 | -0,36 | 0,628779499 | -0,42 | 0,420043356 | 0,29  | 0,646776742 | -0,08 | 0,939127163 |

|       |       |             |       |             |       |             |       |             |       |             |
|-------|-------|-------------|-------|-------------|-------|-------------|-------|-------------|-------|-------------|
| Nmt1  | -0,08 | 0,886889675 | 0,22  | 0,711237219 | 0,23  | 0,752757867 | -0,19 | 0,715808932 | -0,03 | 0,978905747 |
| Nmt2  | 0,21  | 0,705404186 | 0,26  | 0,702845299 | 0,32  | 0,553123868 | 0,14  | 0,890879327 | 0,63  | 0,410369443 |
| Nmu   | 0,27  | 0,625617202 | -0,25 | 0,807175471 | -0,14 | 0,868497826 | 0,21  | 0,784077644 | 0,26  | 0,755576335 |
| Nmur1 | -0,15 | 0,81630789  | -0,21 | 0,683695236 | 0,04  | 0,975771514 | 0,15  | 0,707555232 | 0,22  | 0,890957032 |
| Nmur2 | 0,41  | 0,376151377 | 0,12  | 0,856319127 | 0,18  | 0,744363702 | -0,36 | 0,307242595 | -0,08 | 0,92741476  |
| Nnat  | 0,02  | 0,98456417  | 0,03  | 0,972336944 | -0,18 | 0,759693215 | -0,03 | 0,962043341 | 0,08  | 0,91398047  |
| Nnmt  | 0,85  | 0,261843547 | 0,12  | 0,913777818 | -1,66 | 0,037381207 | 0,98  | 0,266567927 | 0,53  | 0,655956123 |
| Nnt   | 0,42  | 0,705826581 | -0,16 | 0,829626088 | 1,13  | 0,149228124 | -0,39 | 0,535965596 | -0,6  | 0,353136904 |
| Noa1  | -0,12 | 0,892124736 | -0,13 | 0,831404974 | 0,61  | 0,677766266 | 0,64  | 0,193611261 | 0,04  | 0,967788345 |
| Nob1  | -0,19 | 0,807593034 | -0,07 | 0,947186948 | 0     | 0,99879674  | 0,71  | 0,047061038 | 0,79  | 0,075700236 |
| Nobox | 0,02  | 0,979130815 | 0,27  | 0,671582861 | -0,02 | 0,985456301 | -0,12 | 0,87811903  | 0,09  | 0,936090346 |
| Noc2l | -0,22 | 0,806491264 | -0,6  | 0,302028989 | -0,03 | 0,982241391 | 0,96  | 0,062574017 | 0,09  | 0,931519966 |
| Noc3l | -0,55 | 0,412606459 | 0,09  | 0,943713379 | 0,06  | 0,963199274 | 0,08  | 0,93219157  | -0,15 | 0,854369491 |
| Noc4l | 0,67  | 0,178589155 | 0,47  | 0,538642201 | -0,46 | 0,361580981 | 0,38  | 0,536277668 | 0,39  | 0,58512161  |
| Noct  | 0,45  | 0,372648236 | 0,33  | 0,541301427 | 0,55  | 0,443039118 | 1,23  | 0,041875628 | 0,46  | 0,40189401  |
| Nod1  | 0,92  | 0,104092085 | 1,15  | 0,109267475 | -1,28 | 0,01407907  | -0,15 | 0,900529161 | 1,76  | 0,035870857 |
| Nod2  | -0,01 | 0,995091369 | 0,26  | 0,847821325 | -0,1  | 0,924836701 | -0,59 | 0,169251602 | 0,69  | 0,2047166   |
| Nodal | 0,11  | 0,895278749 | -0,14 | 0,890103979 | -0,05 | 0,967930981 | -0,73 | 0,338090869 | -0,13 | 0,933827144 |
| Nog   | 0,13  | 0,829299665 | 0,02  | 0,984006421 | -0,04 | 0,959990799 | 0     | 0,996714438 | -0,57 | 0,572713994 |
| Nol10 | -0,69 | 0,180168214 | 0,09  | 0,869515524 | 0,49  | 0,462643491 | -0,01 | 0,986056435 | -0,13 | 0,885890847 |
| Nol11 | -0,35 | 0,522076759 | -0,26 | 0,725783826 | 0,65  | 0,380830666 | 0,16  | 0,710912745 | 0,1   | 0,923606452 |
| Nol12 | -0,04 | 0,949931783 | -0,17 | 0,747360238 | -0,08 | 0,918441706 | 0,7   | 0,090583584 | 0,1   | 0,890957032 |
| Nol3  | 0,1   | 0,89546421  | 0,03  | 0,967932183 | -0,13 | 0,844191447 | 0     | 0,996769706 | 0,05  | 0,956585095 |
| Nol4  | -0,2  | 0,778869381 | 0,09  | 0,923044405 | -0,31 | 0,639457677 | -0,08 | 0,943143586 | -0,17 | 0,918288793 |
| Nol4l | -0,12 | 0,892124736 | -0,38 | 0,653597085 | 0,56  | 0,303590987 | 0,65  | 0,099217514 | -0,18 | 0,839474287 |
| Nol6  | -0,88 | 0,085632017 | -0,32 | 0,561035617 | 0,07  | 0,916403684 | 0,3   | 0,349260433 | -0,67 | 0,198832044 |
| Nol7  | -0,11 | 0,810822259 | 0,02  | 0,980025949 | -0,15 | 0,836625711 | -0,03 | 0,979516321 | 0,05  | 0,972578221 |
| Nol8  | -0,84 | 0,262000203 | -0,2  | 0,785543886 | 0,09  | 0,917355305 | -0,13 | 0,846021694 | 0,1   | 0,934344891 |
| Nol9  | -0,3  | 0,701297763 | 0,16  | 0,898952381 | 0,74  | 0,334442767 | 0,09  | 0,929835301 | -0,41 | 0,665405183 |
| Nolc1 | -0,47 | 0,387809809 | -0,29 | 0,628604582 | 0,36  | 0,671680785 | 0,79  | 0,097913459 | -0,15 | 0,91339829  |
| Nom1  | 0,18  | 0,908658974 | 0,57  | 0,635735492 | 0,48  | 0,75341132  | -0,36 | 0,619961752 | -0,14 | 0,875713596 |
| Nomo1 | -0,51 | 0,24877804  | -0,82 | 0,162405391 | 0,56  | 0,324321658 | 0,65  | 0,086534078 | -0,84 | 0,056246954 |
| Nono  | -0,21 | 0,612515106 | -0,12 | 0,923313577 | -0,25 | 0,813657034 | 0,02  | 0,982534991 | 0     | 0,997299415 |
| Nop10 | -0,39 | 0,336543382 | -0,39 | 0,480808447 | 0,24  | 0,652745075 | 0,21  | 0,560806909 | -0,15 | 0,881968395 |
| Nop14 | -0,32 | 0,589124269 | 0,01  | 0,990380046 | -0,17 | 0,887630371 | -0,32 | 0,554988456 | 0,03  | 0,977247356 |

|         |       |             |       |             |       |             |       |             |       |             |
|---------|-------|-------------|-------|-------------|-------|-------------|-------|-------------|-------|-------------|
| Nop16   | -0,53 | 0,414026998 | -0,41 | 0,367968212 | 0,47  | 0,459160863 | 0,85  | 0,033644007 | 0,03  | 0,973382116 |
| Nop2    | -0,43 | 0,562631168 | -0,09 | 0,891099    | 0,55  | 0,448223613 | 0,65  | 0,078919423 | -0,01 | 0,990091016 |
| Nop56   | -0,78 | 0,180356049 | -0,53 | 0,383504117 | 0,26  | 0,730066852 | 0,67  | 0,407538226 | 0,56  | 0,518216192 |
| Nop58   | -0,67 | 0,281648139 | 0,09  | 0,892727342 | 0,31  | 0,852219946 | 0,01  | 0,991962381 | 0,54  | 0,352482254 |
| Nop9    | -0,29 | 0,602197374 | -0,08 | 0,928134372 | 0,64  | 0,380301578 | 0,32  | 0,480396347 | -0,17 | 0,836061657 |
| Nos1    | 0,19  | 0,763657448 | -0,28 | 0,756778611 | -0,09 | 0,929871006 | -0,68 | 0,085065241 | -0,02 | 0,985577364 |
| Nos1ap  | -1,36 | 0,06958443  | -0,13 | 0,904698551 | 0,64  | 0,193368921 | -0,52 | 0,298407511 | -0,22 | 0,765327693 |
| Nos2    | 0,59  | 0,260634235 | 1,17  | 0,106620181 | -0,88 | 0,23829372  | 1,14  | 0,072272835 | -1,24 | 0,222441818 |
| Nos3    | -0,36 | 0,422033372 | -0,3  | 0,470454944 | -0,02 | 0,989992757 | -0,51 | 0,230297952 | -0,02 | 0,980961333 |
| Nosip   | -0,23 | 0,656726345 | 0,08  | 0,956555856 | 0,08  | 0,955303601 | -0,8  | 0,134425757 | -0,32 | 0,545532754 |
| Nostrin | -0,12 | 0,914758024 | -0,69 | 0,472042875 | 1,41  | 0,145335521 | -2,43 | 0,011121575 | -1,01 | 0,053570529 |
| Notch1  | -0,21 | 0,642618049 | -0,17 | 0,695689103 | -0,27 | 0,557371995 | -0,26 | 0,461341581 | 0,03  | 0,967807075 |
| Notch2  | -0,36 | 0,687662951 | -0,27 | 0,695265534 | 0,72  | 0,259804772 | -1,06 | 0,111152467 | -0,01 | 0,991437885 |
| Notch3  | 0,19  | 0,894248924 | 0,64  | 0,208445991 | 0,08  | 0,9360611   | -1,47 | 0,011502349 | -0,62 | 0,159047845 |
| Notch4  | -0,24 | 0,594113632 | -0,31 | 0,631460903 | 0,06  | 0,952005428 | 0,26  | 0,484379328 | -0,99 | 0,043177854 |
| Noto    | 0,11  | 0,848783415 | -0,19 | 0,888429981 | 0,01  | 0,997268369 | 0,13  | 0,876246814 | 0,13  | 0,828078935 |
| Notum   | -0,04 | 0,97042066  | 0,3   | 0,48565018  | -0,45 | 0,411571874 | -0,6  | 0,46434209  | 0,1   | 0,954316248 |
| Notumos | 0,03  | 0,959714813 | -0,16 | 0,754578715 | -0,03 | 0,973732268 | 0,28  | 0,469378969 | -0,03 | 0,975441362 |
| Nov     | -0,17 | 0,750634506 | 0,6   | 0,54867175  | 1,93  | 0,064338945 | -0,41 | 0,64635885  | 0,55  | 0,553650211 |
| Nova1   | -0,16 | 0,765464964 | -0,14 | 0,858151501 | 0,69  | 0,225514917 | -0,86 | 0,425113866 | 0,22  | 0,90945413  |
| Nova2   | -0,26 | 0,684541418 | -0,48 | 0,22925197  | -0,25 | 0,647928093 | -0,04 | 0,960816365 | -0,55 | 0,356542289 |
| Nox1    | 0,34  | 0,513761113 | 0,34  | 0,441593532 | -0,16 | 0,799492986 | 0,23  | 0,65999529  | 0,62  | 0,286600165 |
| Nox3    | -0,12 | 0,886741208 | 0,56  | 0,717942902 | -0,45 | 0,38818495  | -0,83 | 0,398898519 | -0,47 | 0,332430866 |
| Nox4    | -0,11 | 0,863067773 | 0,5   | 0,549208729 | 0     | 0,997581017 | 3,48  | 0,003977829 | -0,43 | 0,525018839 |
| Noxa1   | -0,27 | 0,810101389 | -0,63 | 0,302028989 | -0,01 | 0,990293767 | 0,8   | 0,111487533 | 0,49  | 0,357403235 |
| Noxo1   | -0,35 | 0,554962298 | -0,01 | 0,996113371 | -0,09 | 0,955303601 | 0,55  | 0,342672804 | -0,12 | 0,918465043 |
| Noxred1 | -0,12 | 0,892124736 | -0,04 | 0,977206884 | 0,12  | 0,885800676 | -0,35 | 0,724314694 | 0,66  | 0,433531721 |
| Npas1   | -0,11 | 0,894507926 | 0,02  | 0,984962061 | -0,07 | 0,950725218 | -0,05 | 0,944001831 | 0,34  | 0,699996356 |
| Npas2   | -0,55 | 0,531163951 | 0,6   | 0,487451484 | 0,18  | 0,857763054 | 0,7   | 0,658876961 | 0,38  | 0,860282167 |
| Npas3   | -0,31 | 0,412575527 | -0,18 | 0,882589938 | -0,62 | 0,587174496 | -0,39 | 0,58975625  | 0,11  | 0,935100205 |
| Npas4   | -0,26 | 0,663447662 | -0,23 | 0,732044571 | -0,5  | 0,536712236 | 0,07  | 0,90437818  | -0,04 | 0,96738578  |
| Npat    | -0,43 | 0,460231397 | -0,01 | 0,996865461 | 0,37  | 0,65528516  | -0,02 | 0,982613682 | 0,1   | 0,935812103 |
| Npb     | 0,41  | 0,557855331 | 0,16  | 0,842145037 | -0,44 | 0,706842882 | -0,63 | 0,56246056  | -0,06 | 0,97872616  |
| Npbwr1  | -0,12 | 0,883923631 | -0,22 | 0,800067055 | 0     | 0,998779926 | -0,04 | 0,959958662 | -0,14 | 0,864349384 |
| Npc1    | -0,07 | 0,932671813 | 0,02  | 0,985109627 | -0,4  | 0,709317317 | 0,15  | 0,797009622 | 0,47  | 0,376276167 |



|         |       |             |       |             |       |             |       |             |       |             |
|---------|-------|-------------|-------|-------------|-------|-------------|-------|-------------|-------|-------------|
| Npc111  | 0,1   | 0,896678932 | 0,14  | 0,941811651 | -0,09 | 0,914285978 | 0,02  | 0,985865561 | -0,12 | 0,904040121 |
| Npc2    | 0,96  | 0,185970906 | 0,49  | 0,432687588 | -0,44 | 0,333179926 | -0,45 | 0,205383915 | -0,11 | 0,899825706 |
| Npdc1   | 0,23  | 0,541417213 | 0,52  | 0,391122953 | -0,43 | 0,520931071 | 0,14  | 0,754318983 | 0,5   | 0,266832581 |
| Npepl1  | -0,55 | 0,242253082 | -0,22 | 0,644516897 | 0,08  | 0,909963525 | 0,17  | 0,758772982 | -0,16 | 0,860058375 |
| Npepps  | 0,29  | 0,674821764 | 0,46  | 0,652382749 | -0,28 | 0,748528575 | 0,36  | 0,512594616 | 0,14  | 0,913274952 |
| Npff    | 0,8   | 0,256112056 | -0,01 | 0,986637545 | 0,07  | 0,948637233 | -0,18 | 0,779616632 | 0,17  | 0,820170392 |
| Npffr1  | 0,06  | 0,932253002 | -0,03 | 0,963369162 | -0,13 | 0,892881818 | 0,1   | 0,89753062  | 0,2   | 0,838679773 |
| Npffr2  | 0,42  | 0,318041432 | -0,09 | 0,912535732 | -0,37 | 0,566099777 | 0,18  | 0,674665764 | -0,14 | 0,858534673 |
| Nphp1   | 0,14  | 0,785268526 | -0,49 | 0,567985291 | 0,57  | 0,246580815 | -0,04 | 0,95852873  | -0,52 | 0,467165141 |
| Nphp3   | 0,49  | 0,597954095 | 0,71  | 0,356307531 | 0     | 0,999931921 | -1    | 0,129154295 | -0,87 | 0,166318063 |
| Nphp4   | -0,05 | 0,950669622 | -0,37 | 0,712546063 | 0,4   | 0,533790057 | 0,23  | 0,685070923 | -0,11 | 0,910301996 |
| Nphs1   | 0,15  | 0,758067417 | -0,31 | 0,587634717 | -0,35 | 0,59755586  | 0,19  | 0,596561607 | -0,13 | 0,850611225 |
| Nphs1os | 0,01  | 0,991919022 | -0,11 | 0,882589938 | 0,15  | 0,813212086 | 0,29  | 0,642906557 | -0,06 | 0,948935854 |
| Nphs2   | 0,12  | 0,865055523 | 0,07  | 0,934602811 | -0,45 | 0,406974641 | -0,91 | 0,4430986   | -0,55 | 0,723883531 |
| Npl     | -0,08 | 0,967121748 | -0,52 | 0,694017753 | 0,73  | 0,479168256 | -0,54 | 0,561974208 | -0,77 | 0,587915673 |
| Nploc4  | -0,2  | 0,678857468 | -0,32 | 0,557141891 | 0,61  | 0,253309689 | 1     | 0,21720284  | 0,07  | 0,961251206 |
| Npm2    | 0,69  | 0,432091361 | -0,29 | 0,734096329 | 0,44  | 0,349068884 | 0,62  | 0,240061976 | 0,07  | 0,931435802 |
| Npm3    | 0     | 0,999536558 | -0,33 | 0,724623263 | 0,28  | 0,660561609 | 0,75  | 0,081165151 | 0,51  | 0,298419835 |
| Npn2    | -0,47 | 0,305893528 | 0     | 1           | 0,06  | 0,962260416 | 0,44  | 0,487556882 | 0,27  | 0,681597394 |
| Npnt    | -1,34 | 0,260634235 | -0,52 | 0,256845239 | 0,43  | 0,492393393 | -3,47 | 0,005620327 | -0,23 | 0,859050817 |
| Nppa    | 0,09  | 0,892124736 | -0,08 | 0,880259895 | -0,14 | 0,880574524 | 0,04  | 0,934699218 | 0,1   | 0,918797466 |
| Nppb    | 0,88  | 0,584751892 | 0,03  | 0,954866231 | 0,42  | 0,720377272 | 0,17  | 0,761112157 | 0,28  | 0,74624632  |
| Nppc    | 0,67  | 0,149941264 | 0,55  | 0,388595716 | 0,07  | 0,938795886 | 0,43  | 0,395050771 | 0,04  | 0,964983559 |
| Npr1    | -0,58 | 0,247131161 | -0,28 | 0,686540452 | 0,42  | 0,616398569 | -2,38 | 0,006048812 | -0,53 | 0,257751018 |
| Npr2    | -0,63 | 0,393169325 | -0,26 | 0,661976216 | -0,01 | 0,990836784 | -0,21 | 0,617812472 | -0,87 | 0,058814936 |
| Npr3    | -1,11 | 0,097625832 | -0,14 | 0,915784454 | 1,3   | 0,032673349 | -4,05 | 0,012628389 | -1,7  | 0,025979071 |
| Nprl2   | 0,47  | 0,349257129 | 0,25  | 0,757731643 | 0,23  | 0,828321132 | -1,08 | 0,058105959 | -0,07 | 0,949544475 |
| Nprl3   | -0,27 | 0,625047645 | 0,59  | 0,428565008 | 0,73  | 0,446493846 | -1,13 | 0,122878937 | -0,32 | 0,682163441 |
| Nps     | -0,16 | 0,892823025 | -0,41 | 0,781665479 | 0,21  | 0,763076859 | -0,11 | 0,858956727 | -0,24 | 0,731527639 |
| Npsr1   | 0,31  | 0,701391957 | 0,19  | 0,904748854 | -0,32 | 0,727262258 | -0,06 | 0,972726639 | 0,06  | 0,97206128  |
| Nptn    | 0,25  | 0,539953121 | -0,1  | 0,859816636 | 0,46  | 0,524815503 | -0,24 | 0,448917988 | -0,11 | 0,880901187 |
| Nptx1   | -1,58 | 0,071512866 | -1,31 | 0,110353626 | 0,5   | 0,321190008 | 0,66  | 0,084374314 | -0,49 | 0,3397798   |
| Nptx2   | -0,29 | 0,764824121 | 0,06  | 0,946885634 | 0,36  | 0,657150555 | 0,02  | 0,975655831 | 0,03  | 0,978604922 |
| Nptxr   | 0,17  | 0,923532124 | 0,35  | 0,807674009 | -0,11 | 0,917854133 | 0,24  | 0,62733822  | 0,17  | 0,84147389  |
| Npvf    | -0,14 | 0,796476889 | 0,15  | 0,963369162 | -0,11 | 0,904057901 | -0,42 | 0,827764222 | -0,07 | 0,940774655 |

|         |       |             |       |             |       |             |       |             |       |             |
|---------|-------|-------------|-------|-------------|-------|-------------|-------|-------------|-------|-------------|
| Npw     | -0,14 | 0,774822327 | 0,26  | 0,776548278 | 0,05  | 0,935778422 | -0,18 | 0,739878511 | -0,2  | 0,820234867 |
| Npy     | 0,2   | 0,755100499 | 0,11  | 0,792112243 | 0,01  | 0,995568713 | 0,24  | 0,492206709 | 0,01  | 0,990633766 |
| Npy1r   | -0,05 | 0,926692467 | 0,08  | 0,874448335 | 0,14  | 0,851593229 | -0,99 | 0,224823285 | -1,12 | 0,376385479 |
| Npy2r   | 0,39  | 0,455942583 | -0,07 | 0,935041212 | 0,09  | 0,921956183 | -0,04 | 0,959958662 | -0,02 | 0,982813638 |
| Npy4r   | 0,23  | 0,764957267 | -0,08 | 0,928134372 | -0,14 | 0,811669636 | 0,2   | 0,774826947 | 0,05  | 0,953971867 |
| Npy5r   | -0,04 | 0,950669622 | 0,34  | 0,515150309 | -0,06 | 0,946777487 | 0,02  | 0,971149993 | 0,26  | 0,806246741 |
| Npy6r   | -0,07 | 0,883142096 | 0,28  | 0,653349694 | -0,16 | 0,76370647  | -0,37 | 0,37252791  | -0,21 | 0,782551174 |
| Nqo1    | -0,25 | 0,836336792 | -0,26 | 0,804394095 | 0,27  | 0,688126003 | 0,15  | 0,935076398 | 0,63  | 0,647482876 |
| Nqo2    | -0,1  | 0,909656399 | 0,46  | 0,428565008 | 0,39  | 0,649733839 | 0,97  | 0,267639393 | -0,43 | 0,678938588 |
| Nr0b1   | -0,15 | 0,818277668 | -0,11 | 0,882847123 | 0,26  | 0,65523615  | -0,08 | 0,852687535 | -0,07 | 0,925858284 |
| Nr0b2   | 0,13  | 0,85605567  | -0,09 | 0,913705287 | 0,04  | 0,960189767 | 0,28  | 0,347503588 | 0,16  | 0,794001669 |
| Nr1d1   | -0,63 | 0,153824107 | -0,19 | 0,847821325 | 0,44  | 0,743604411 | -1,24 | 0,095301944 | -0,6  | 0,530072156 |
| Nr1d2   | 0,31  | 0,580117138 | 0,37  | 0,446315327 | -0,03 | 0,989923808 | -0,86 | 0,126774995 | -0,2  | 0,853060981 |
| Nr1h2   | 0,29  | 0,42402714  | 0,38  | 0,485712513 | -0,34 | 0,447140999 | -0,07 | 0,889515057 | 0,4   | 0,38695806  |
| Nr1h3   | 0,1   | 0,928103232 | -0,25 | 0,808222835 | 0,44  | 0,650361351 | -0,94 | 0,094905894 | 0,06  | 0,952718905 |
| Nr1h4   | 0,43  | 0,42419181  | 0,07  | 0,894676428 | 0,03  | 0,967930981 | -0,34 | 0,513116548 | 0,21  | 0,912250982 |
| Nr1h5   | -0,14 | 0,841140165 | 0,17  | 0,705532323 | -0,05 | 0,959862254 | -0,24 | 0,722467708 | -0,02 | 0,984632256 |
| Nr1i2   | 0,16  | 0,717092201 | 0,11  | 0,916496897 | 0,2   | 0,770526999 | 0,12  | 0,854971757 | 0,04  | 0,97206128  |
| Nr1i3   | 0,01  | 0,993728727 | 0,15  | 0,832841509 | 0,07  | 0,926271642 | -0,34 | 0,513982687 | -0,28 | 0,814394495 |
| Nr2c1   | -0,6  | 0,277154156 | 0,02  | 0,99460836  | 0,2   | 0,849342965 | 0,23  | 0,880590198 | 0,19  | 0,915395762 |
| Nr2c2   | 0,22  | 0,701086418 | -0,21 | 0,814440031 | 0,26  | 0,627675225 | -0,03 | 0,977051333 | -0,05 | 0,97206128  |
| Nr2c2ap | -0,54 | 0,20299588  | -0,09 | 0,94021592  | 0,5   | 0,654076196 | 0,32  | 0,55856048  | -0,08 | 0,960000999 |
| Nr2e1   | 0,26  | 0,528638029 | 0,13  | 0,930192503 | -0,47 | 0,51127708  | 0,01  | 0,994376209 | -0,06 | 0,960974478 |
| Nr2e3   | 0,01  | 0,992058402 | -0,04 | 0,975760063 | 0,03  | 0,983926261 | 0,01  | 0,995662115 | 0,04  | 0,967643106 |
| Nr2f1   | 0,43  | 0,403765204 | -0,2  | 0,868234125 | 0,35  | 0,692825782 | -1,19 | 0,080032206 | -0,35 | 0,647354415 |
| Nr2f2   | -0,23 | 0,632027377 | -0,55 | 0,325273628 | 0,01  | 0,990836784 | -1,47 | 0,025650579 | -0,78 | 0,256989438 |
| Nr2f6   | -0,09 | 0,901747703 | -0,38 | 0,738762579 | -0,08 | 0,946215929 | -0,09 | 0,948771554 | 0,03  | 0,983469081 |
| Nr3c1   | 0,3   | 0,654363277 | -0,21 | 0,703558337 | 0,1   | 0,93278571  | -0,76 | 0,235121784 | 0,21  | 0,835838043 |
| Nr3c2   | 0,48  | 0,644174496 | 0,6   | 0,71637181  | -0,38 | 0,737762056 | -2,4  | 0,041009258 | 0,97  | 0,087632866 |
| Nr4a1   | -0,56 | 0,174111975 | -0,15 | 0,7122758   | 0,04  | 0,958867495 | -0,47 | 0,30253376  | -0,62 | 0,278234561 |
| Nr4a2   | -0,47 | 0,421029929 | -0,03 | 0,981236932 | 0,26  | 0,723042494 | -1,77 | 0,017534652 | -0,17 | 0,820429603 |
| Nr4a3   | -0,62 | 0,436604493 | -0,22 | 0,845112339 | -0,09 | 0,902833174 | 0,03  | 0,978558892 | 0,05  | 0,968038677 |
| Nr5a1   | -0,23 | 0,758183995 | -0,13 | 0,8118048   | 0,38  | 0,610559205 | 0,61  | 0,251630483 | 0,22  | 0,780418062 |
| Nr5a1os | -0,06 | 0,914868427 | 0,11  | 0,862024138 | -0,13 | 0,861307315 | -0,01 | 0,982450636 | -0,04 | 0,966951657 |
| Nr5a2   | -1,42 | 0,289889876 | -0,18 | 0,687051869 | 0,07  | 0,94940954  | 0,82  | 0,43764938  | 0,31  | 0,835191    |

|          |       |             |       |             |       |             |       |             |       |             |
|----------|-------|-------------|-------|-------------|-------|-------------|-------|-------------|-------|-------------|
| n-R5s136 | -0,04 | 0,966775766 | -0,09 | 0,930192503 | -0,32 | 0,610141978 | 0,16  | 0,73719503  | 0,08  | 0,924811768 |
| Nr6a1    | -0,11 | 0,892823025 | -0,56 | 0,379721127 | 0,19  | 0,867543859 | 1,28  | 0,041615252 | 0,85  | 0,174362184 |
| Nradd    | -0,2  | 0,871927625 | -0,06 | 0,898701949 | 0,43  | 0,328297131 | -0,11 | 0,763917371 | 0,27  | 0,651600115 |
| Nrap     | -0,02 | 0,975506993 | 0,11  | 0,855632384 | 0,13  | 0,849342965 | 0,36  | 0,398787938 | 0,19  | 0,7793502   |
| Nrarp    | -0,59 | 0,277154156 | -0,7  | 0,445440936 | 0,41  | 0,388827614 | 0,56  | 0,445686728 | 0,21  | 0,813490069 |
| Nras     | 0,25  | 0,613387484 | 0,01  | 0,99691664  | 0,18  | 0,777810365 | 0,09  | 0,884267408 | 0,31  | 0,595620288 |
| Nrbf2    | -0,2  | 0,716918624 | -0,16 | 0,720667099 | 0,03  | 0,978012085 | 0,08  | 0,86343293  | -0,12 | 0,891138902 |
| Nrbp1    | -0,27 | 0,473832525 | 0     | 0,998513452 | -0,23 | 0,663029337 | 0,1   | 0,814542769 | 0,02  | 0,984125319 |
| Nrbp2    | -0,53 | 0,283048682 | 0,23  | 0,80678645  | 0,08  | 0,964509282 | -1,54 | 0,007965753 | 0,47  | 0,298405554 |
| Nrcam    | -0,4  | 0,446515613 | -0,15 | 0,916496897 | 0,04  | 0,966359868 | -2,38 | 0,052122977 | 0,62  | 0,600537288 |
| Nrd1     | -0,14 | 0,752808308 | -0,18 | 0,65330451  | 0,13  | 0,868451584 | -0,14 | 0,855094874 | -0,18 | 0,841160223 |
| Nrde2    | 0,03  | 0,974976131 | -0,25 | 0,785153081 | 0,45  | 0,762750682 | 0,3   | 0,573970842 | -0,08 | 0,935548264 |
| Nrep     | -0,2  | 0,771904131 | -0,79 | 0,352569488 | 0,79  | 0,292557534 | 0,68  | 0,329534459 | -0,05 | 0,9651757   |
| Nrf1     | 0,32  | 0,546019769 | 0,04  | 0,943915456 | -0,08 | 0,934893656 | 0,15  | 0,683901621 | 0,14  | 0,824818547 |
| Nrg1     | -0,15 | 0,761174764 | 0,07  | 0,940161762 | -0,05 | 0,963199274 | -0,2  | 0,698362346 | 0,54  | 0,46391899  |
| Nrg2     | -0,05 | 0,950669622 | -0,4  | 0,717082896 | 0,21  | 0,782988471 | 0,53  | 0,405668871 | 0,19  | 0,805718723 |
| Nrg3     | -0,12 | 0,926007268 | -0,21 | 0,667170465 | -0,17 | 0,816099554 | -0,22 | 0,642608533 | 0,08  | 0,947559952 |
| Nrg3os   | 0,36  | 0,559760851 | 0,5   | 0,525873177 | -0,03 | 0,978207511 | -0,3  | 0,461501892 | -0,29 | 0,550083777 |
| Nrg4     | 0,28  | 0,662948451 | -0,16 | 0,90251322  | 0,1   | 0,917749723 | 0,57  | 0,294345732 | 0,24  | 0,747828814 |
| Nrgn     | -0,36 | 0,686076441 | -0,13 | 0,943915456 | -0,03 | 0,983764388 | -0,58 | 0,604807516 | -0,11 | 0,924431292 |
| Nrip1    | 0,57  | 0,193430471 | 0,11  | 0,910688765 | 0,22  | 0,709314442 | 0,81  | 0,178335102 | -0,07 | 0,947733697 |
| Nrip2    | 0,17  | 0,909284689 | -0,02 | 0,995205602 | -0,31 | 0,657277431 | -2,16 | 0,017662145 | -0,83 | 0,167471112 |
| Nrip3    | 0,11  | 0,870052902 | 0,09  | 0,927205716 | -0,37 | 0,622546805 | 0,07  | 0,947809027 | 0,07  | 0,961642558 |
| Nrk      | 0,33  | 0,484960336 | 1,09  | 0,078313776 | -0,22 | 0,645463575 | -0,14 | 0,702808038 | 0,48  | 0,392211523 |
| Nrl      | -0,11 | 0,831253977 | -0,25 | 0,666450149 | 0,36  | 0,543696688 | -0,03 | 0,962670023 | -0,11 | 0,880656145 |
| Nrm      | -0,57 | 0,422775151 | -0,68 | 0,242981491 | 0,56  | 0,389841181 | -0,17 | 0,768880868 | -0,49 | 0,390679549 |
| Nrn1     | 0,14  | 0,756729539 | -0,04 | 0,950566249 | 0,25  | 0,721083003 | -0,09 | 0,879527088 | 0,07  | 0,939448119 |
| Nrn1l    | -0,05 | 0,933912196 | -0,29 | 0,639698557 | 0,3   | 0,633959081 | 0,08  | 0,911831177 | 0,16  | 0,917844354 |
| Nron     | 0,15  | 0,795890481 | -0,43 | 0,584191373 | -0,21 | 0,675674731 | 0,25  | 0,605901989 | -0,23 | 0,803067141 |
| Nrp      | 0,38  | 0,510737023 | 0,04  | 0,979406438 | -0,19 | 0,8271738   | 0,43  | 0,704328661 | 0,14  | 0,932627212 |
| Nrp1     | -1,02 | 0,074890017 | -0,58 | 0,241152716 | 0,57  | 0,36121902  | -0,84 | 0,121231601 | -0,75 | 0,216981201 |
| Nrp2     | -0,46 | 0,29523865  | -0,47 | 0,386064253 | 0,49  | 0,420043356 | 0,04  | 0,967216871 | -0,49 | 0,443763251 |
| Nrros    | -0,78 | 0,392900129 | -0,3  | 0,84786877  | 1,2   | 0,186321498 | 0,71  | 0,255095522 | -0,09 | 0,911850421 |
| Nrsn1    | -0,18 | 0,79616541  | 0,09  | 0,892869412 | 0,01  | 0,993772233 | 0,29  | 0,604127556 | -0,11 | 0,92042936  |
| Nrsn2    | -0,03 | 0,965298123 | -0,1  | 0,847363727 | -0,07 | 0,932706021 | 0,16  | 0,739831108 | 0,04  | 0,962525821 |

|         |       |             |       |             |       |             |       |             |       |             |
|---------|-------|-------------|-------|-------------|-------|-------------|-------|-------------|-------|-------------|
| Nrtn    | -0,54 | 0,377372764 | -0,1  | 0,938088718 | 0,01  | 0,994572791 | -0,17 | 0,871925977 | 0,2   | 0,865258929 |
| Nrxn1   | 0,44  | 0,617280733 | -0,19 | 0,851610126 | -0,18 | 0,897176063 | -0,55 | 0,20743874  | -0,68 | 0,296072704 |
| Nrxn2   | -0,29 | 0,62872508  | 0,02  | 0,989873399 | -0,12 | 0,914867655 | -0,46 | 0,321312911 | -0,45 | 0,447019099 |
| Nrxn3   | -0,08 | 0,921306075 | -0,28 | 0,755425198 | -0,42 | 0,393204165 | -0,31 | 0,658087437 | -0,45 | 0,548858437 |
| Nsa2    | 0,16  | 0,680520303 | 0,24  | 0,51825831  | -0,13 | 0,812319246 | 0,42  | 0,296180322 | 0,26  | 0,675282484 |
| Nsd1    | 0,1   | 0,896152991 | 0,04  | 0,943713379 | 0,24  | 0,814956693 | -0,28 | 0,429087142 | -0,05 | 0,961923869 |
| Nsdhl   | -0,96 | 0,104092085 | -0,5  | 0,531993971 | 0,46  | 0,711472088 | 0,35  | 0,416347026 | -0,93 | 0,062363669 |
| Nsf     | -0,19 | 0,716161525 | -0,57 | 0,317755212 | -0,15 | 0,814956693 | 0,7   | 0,110506273 | 0     | 0,995960873 |
| Nsfl1c  | 0,19  | 0,664456582 | -0,41 | 0,371450754 | 0,04  | 0,957552304 | 0,34  | 0,309664531 | -0,13 | 0,848149847 |
| Nsg1    | -0,43 | 0,469049834 | -0,69 | 0,495742596 | -0,21 | 0,908400411 | -1,16 | 0,134491611 | -0,86 | 0,174362184 |
| Nsg2    | 0,65  | 0,34052888  | -0,22 | 0,766370671 | -0,28 | 0,757498725 | 0,09  | 0,880348219 | 0,04  | 0,962528065 |
| Nsl1    | 0,29  | 0,493444352 | -1,18 | 0,495742596 | -0,06 | 0,977827235 | 1,56  | 0,223634838 | 0,23  | 0,89630096  |
| Nsmaf   | -0,15 | 0,781961688 | -0,07 | 0,932292974 | -0,18 | 0,841942589 | -0,56 | 0,111750195 | 0,1   | 0,91314596  |
| Nsmce1  | 0,4   | 0,389268664 | 0,01  | 0,992175086 | 0,15  | 0,867034674 | 0,26  | 0,436661219 | 0,33  | 0,48229889  |
| Nsmce2  | 0,23  | 0,764288636 | 0,02  | 0,978741224 | 0,53  | 0,660920525 | 0,06  | 0,928065995 | 0,19  | 0,801087448 |
| Nsmce4a | -0,01 | 0,995438679 | 0,09  | 0,9304005   | 0,65  | 0,546751391 | 0,06  | 0,967866794 | 0,69  | 0,484088463 |
| Nsmf    | -0,01 | 0,991919022 | 0,23  | 0,701492683 | -0,19 | 0,830336321 | -0,26 | 0,693667364 | -0,24 | 0,78369432  |
| Nsrp1   | 0,02  | 0,980085387 | -0,2  | 0,872187376 | 0,11  | 0,896181325 | -0,04 | 0,972244785 | 0,17  | 0,90813354  |
| Nsun2   | -0,48 | 0,187868882 | -0,68 | 0,127301007 | 0,11  | 0,898935616 | 1,21  | 0,151396301 | 0,25  | 0,825564898 |
| Nsun3   | -0,31 | 0,501612988 | 0,15  | 0,930192503 | 0,42  | 0,777417583 | -0,12 | 0,863587573 | -0,77 | 0,174503895 |
| Nsun4   | 0,32  | 0,765464964 | -0,04 | 0,966717367 | 0,02  | 0,99394877  | 0,07  | 0,959777804 | 0,85  | 0,540089233 |
| Nsun5   | -0,15 | 0,919567534 | 0,38  | 0,785705702 | 0,15  | 0,877598693 | -0,61 | 0,418157488 | -0,26 | 0,724669859 |
| Nsun6   | 0,03  | 0,984692479 | 0,14  | 0,923541122 | 0,35  | 0,695705149 | -0,78 | 0,171625869 | -0,05 | 0,977775233 |
| Nsun7   | 0,4   | 0,583196213 | 0,48  | 0,569612894 | -0,3  | 0,771873685 | -0,17 | 0,676010477 | 0,58  | 0,497340464 |
| Nt5c    | -0,29 | 0,477506027 | -0,29 | 0,611269268 | 0,28  | 0,66424919  | 0,45  | 0,303816416 | -0,28 | 0,704344004 |
| Nt5c1a  | -0,02 | 0,979827119 | -0,4  | 0,486118041 | -0,15 | 0,862480223 | 0,52  | 0,287840988 | 0,3   | 0,581814709 |
| Nt5c1b  | 0,12  | 0,877348711 | -0,36 | 0,546908088 | -0,42 | 0,527689832 | 0,4   | 0,451529929 | 0,19  | 0,864540232 |
| Nt5c2   | -0,18 | 0,863442794 | -0,33 | 0,656204868 | 0,66  | 0,56948206  | -0,93 | 0,239185309 | -0,24 | 0,816305974 |
| Nt5c3   | 0,6   | 0,187087108 | 1,21  | 0,143690114 | -1,6  | 0,002848711 | 0,24  | 0,700431952 | 1,4   | 0,046615146 |
| Nt5c3b  | -0,72 | 0,123013731 | -0,16 | 0,888963925 | 0,37  | 0,647988621 | 0,18  | 0,76550092  | -0,32 | 0,594534591 |
| Nt5dc1  | -0,52 | 0,542561813 | 0,06  | 0,928134372 | 0,16  | 0,904057901 | -0,49 | 0,193084465 | -0,78 | 0,400303226 |
| Nt5dc2  | -1,14 | 0,153755071 | -2,07 | 0,120686566 | 2,45  | 0,001411704 | 2,35  | 0,004876398 | -0,13 | 0,869309773 |
| Nt5dc3  | 0,37  | 0,357054834 | 0,31  | 0,603359081 | -0,26 | 0,703372614 | -0,4  | 0,601687553 | 0,12  | 0,925949592 |
| Nt5e    | 0,15  | 0,7914678   | -0,13 | 0,753920808 | -0,04 | 0,983471086 | 5,24  | 0,006674277 | -0,87 | 0,513517573 |
| Nt5m    | -0,38 | 0,59756524  | -0,06 | 0,962028658 | 0     | 0,998479656 | -0,34 | 0,526586186 | -0,66 | 0,211693235 |

|        |       |             |       |             |       |             |       |             |       |             |
|--------|-------|-------------|-------|-------------|-------|-------------|-------|-------------|-------|-------------|
| Ntan1  | 0,07  | 0,932324918 | -0,24 | 0,688450928 | -0,18 | 0,827761588 | 0,11  | 0,869166856 | 0,13  | 0,881079068 |
| Ntf3   | 0,29  | 0,687472607 | 0,14  | 0,811280211 | -0,52 | 0,548839869 | -3,16 | 0,008180428 | -0,79 | 0,373929884 |
| Ntf5   | 0,17  | 0,843886138 | 0,1   | 0,900476061 | 0,33  | 0,586688615 | 0,14  | 0,797109702 | 0,15  | 0,884640084 |
| Nthl1  | -0,09 | 0,903817676 | -0,24 | 0,664787536 | -0,06 | 0,94940954  | -0,27 | 0,560223278 | -0,19 | 0,80222716  |
| Ntm    | -0,45 | 0,500832169 | 0     | 0,999210601 | -0,16 | 0,82622365  | -0,47 | 0,299592522 | 0,11  | 0,907121694 |
| Ntmt1  | -0,35 | 0,53440815  | -0,47 | 0,373158462 | 0,18  | 0,80546411  | 0,61  | 0,243285301 | -0,68 | 0,249774523 |
| Ntn1   | 0,76  | 0,595245851 | 0,93  | 0,329278237 | -0,18 | 0,759119898 | -0,72 | 0,244419467 | -0,48 | 0,397481272 |
| Ntn3   | -0,32 | 0,656034838 | -0,12 | 0,796482292 | -0,19 | 0,746677927 | -0,42 | 0,353164818 | -0,34 | 0,555315018 |
| Ntn4   | -1,18 | 0,15490509  | -0,12 | 0,868234125 | 0,36  | 0,726345421 | -6,32 | 0,002895999 | -0,92 | 0,136162672 |
| Ntn5   | 0,72  | 0,181600158 | -0,02 | 0,973945454 | 0,13  | 0,860731655 | 0,29  | 0,598657551 | 0,02  | 0,98653183  |
| Ntng1  | 0,27  | 0,594739156 | -0,19 | 0,864680059 | -0,32 | 0,653810439 | -0,27 | 0,41819556  | -0,8  | 0,155847858 |
| Ntng2  | 0,83  | 0,157941498 | 0,14  | 0,798937675 | -0,16 | 0,862146599 | -1,33 | 0,065063652 | 0,01  | 0,993865559 |
| Ntpcr  | -0,28 | 0,576406658 | -0,15 | 0,804576975 | -0,14 | 0,864411302 | 0,55  | 0,342459451 | -0,08 | 0,951236192 |
| Ntrk1  | -0,05 | 0,950669622 | 0,41  | 0,692139075 | 0,31  | 0,561635554 | -0,44 | 0,368956303 | -0,16 | 0,816435488 |
| Ntrk2  | -0,37 | 0,720829271 | -0,11 | 0,929575557 | -0,09 | 0,940489823 | 0,02  | 0,983454779 | -0,19 | 0,785366989 |
| Ntrk3  | 0,23  | 0,576009654 | 0,03  | 0,983507621 | -0,04 | 0,95633676  | -0,58 | 0,603611964 | -0,33 | 0,808285534 |
| Nts    | -0,01 | 0,992406613 | -2,7  | 0,051918634 | 0,42  | 0,709885771 | 3,27  | 0,021644799 | 0,21  | 0,944318268 |
| Ntsr1  | 0,15  | 0,864598944 | -0,05 | 0,922703368 | -0,06 | 0,941063967 | -0,03 | 0,970665844 | 0,43  | 0,604527903 |
| Ntsr2  | -0,04 | 0,970286316 | 0,09  | 0,862789755 | -0,16 | 0,791504463 | 0,42  | 0,225317501 | 0,23  | 0,742013726 |
| Nuak1  | 1,66  | 0,06958443  | 1,81  | 0,06498412  | -1,7  | 0,003101821 | -3,06 | 0,004331967 | 0,47  | 0,390857727 |
| Nuak2  | 0,6   | 0,240103167 | 0,88  | 0,424175253 | -1,07 | 0,104641251 | -0,05 | 0,95852873  | 0,09  | 0,904684159 |
| Nub1   | 0,36  | 0,549437855 | 0,94  | 0,087315688 | -0,27 | 0,733763511 | -0,37 | 0,454745737 | 1,1   | 0,053570529 |
| Nubp1  | -0,1  | 0,865447171 | -0,12 | 0,861862086 | 0,06  | 0,938795886 | 1,22  | 0,215252719 | 0,74  | 0,447019099 |
| Nubp2  | -0,34 | 0,540951867 | -0,47 | 0,48326573  | -0,13 | 0,953456022 | 0,38  | 0,32086395  | -0,24 | 0,715879151 |
| Nubpl  | -0,04 | 0,96869339  | -0,2  | 0,845936068 | 0,57  | 0,625295543 | -0,45 | 0,428767536 | -0,82 | 0,311343214 |
| Nucb1  | -0,06 | 0,916584129 | -0,04 | 0,943915456 | 0,2   | 0,707571856 | -0,29 | 0,380741558 | -0,76 | 0,087632866 |
| Nucb2  | 0,31  | 0,372898143 | -0,02 | 0,977207129 | 0,23  | 0,798977949 | 0,74  | 0,140865327 | -0,01 | 0,996197742 |
| Nucks1 | -0,79 | 0,076386406 | -0,78 | 0,173853383 | 0,85  | 0,059479841 | 0,06  | 0,92328164  | 0,12  | 0,868583076 |
| Nudc   | -0,56 | 0,292065727 | -0,47 | 0,557000864 | 1,17  | 0,044788983 | 0,23  | 0,703719273 | -0,46 | 0,560964387 |
| Nudcd1 | 0,18  | 0,866720868 | 0,18  | 0,722727486 | 0,61  | 0,703647945 | 0,69  | 0,455883516 | 0,03  | 0,986971861 |
| Nudcd2 | -0,54 | 0,376151377 | -0,51 | 0,814499098 | 1,25  | 0,187379123 | 1,71  | 0,062430624 | 0,14  | 0,916489445 |
| Nudcd3 | -0,24 | 0,786095978 | -0,18 | 0,794861907 | 0,19  | 0,814575035 | -0,07 | 0,958172386 | 0,31  | 0,807620467 |
| Nudt1  | 0,28  | 0,474293292 | -0,08 | 0,908677592 | 0,22  | 0,795235368 | 1,34  | 0,063363265 | 0,29  | 0,764679653 |
| Nudt10 | -0,02 | 0,979827119 | -0,04 | 0,958856577 | 0,06  | 0,948192096 | -0,53 | 0,21001567  | -0,27 | 0,792305774 |
| Nudt11 | 0,3   | 0,691658566 | 0,26  | 0,638366221 | -0,43 | 0,647006895 | 0,33  | 0,730531335 | 0,45  | 0,608004947 |

|          |       |             |       |             |       |             |       |             |       |             |
|----------|-------|-------------|-------|-------------|-------|-------------|-------|-------------|-------|-------------|
| Nudt12   | -0,05 | 0,972667767 | -0,48 | 0,619025787 | 0,17  | 0,883534784 | -1,3  | 0,042586901 | -0,18 | 0,829280005 |
| Nudt12os | -0,07 | 0,923532124 | -0,07 | 0,882847123 | -0,24 | 0,717400486 | -0,17 | 0,631515639 | -0,6  | 0,160551929 |
| Nudt13   | -0,01 | 0,993175772 | 0,31  | 0,741608026 | -0,23 | 0,807786405 | -0,85 | 0,186368589 | 0,25  | 0,808727809 |
| Nudt14   | -0,47 | 0,297114721 | -0,03 | 0,971464245 | 0,92  | 0,342313446 | -0,44 | 0,226196019 | -0,19 | 0,765809384 |
| Nudt15   | -0,02 | 0,984759626 | 0,02  | 0,983071427 | -0,33 | 0,657150555 | 0,13  | 0,772783569 | 0,02  | 0,987726511 |
| Nudt16   | 0,57  | 0,268855987 | 0,02  | 0,994137877 | -0,15 | 0,862246043 | -0,04 | 0,960747562 | -0,04 | 0,977212067 |
| Nudt16l1 | -0,43 | 0,515770167 | -0,11 | 0,842145037 | 0,92  | 0,363565369 | -0,24 | 0,614617075 | -0,17 | 0,8155257   |
| Nudt17   | 0,56  | 0,526856715 | 0,08  | 0,932628106 | 0,43  | 0,628978443 | -1,46 | 0,018937125 | -0,7  | 0,395115041 |
| Nudt18   | 0,05  | 0,967288782 | 0,35  | 0,666450149 | 0,14  | 0,943365715 | 0,06  | 0,972244785 | -0,22 | 0,904684159 |
| Nudt19   | -0,14 | 0,850772648 | -0,25 | 0,664787536 | 0,18  | 0,862480223 | -0,06 | 0,921929178 | -0,19 | 0,760555206 |
| Nudt2    | -0,25 | 0,704720946 | -0,2  | 0,610418322 | 0,06  | 0,967930981 | 0,18  | 0,640737261 | -0,21 | 0,739851808 |
| Nudt21   | -0,33 | 0,476072345 | -0,3  | 0,646360537 | 0,41  | 0,483761569 | 1,04  | 0,05386085  | -0,22 | 0,785366989 |
| Nudt22   | -0,36 | 0,621072378 | 0,11  | 0,874195024 | 0,51  | 0,598179126 | -0,23 | 0,668850659 | -0,2  | 0,831815586 |
| Nudt3    | -0,06 | 0,948926586 | -0,38 | 0,592245952 | 0,05  | 0,974887915 | 0,66  | 0,141951595 | 0,31  | 0,551972106 |
| Nudt4    | -0,15 | 0,735799425 | -0,08 | 0,853526739 | 0,63  | 0,343153229 | 1,84  | 0,007250152 | -0,53 | 0,424491079 |
| Nudt5    | -0,67 | 0,197636424 | -1,09 | 0,302028989 | 0,56  | 0,593455611 | 1,38  | 0,061195644 | 0,52  | 0,602231893 |
| Nudt6    | -1,33 | 0,095509762 | 0,23  | 0,792069553 | 0,09  | 0,961453721 | -0,51 | 0,685043191 | 0,01  | 0,99505102  |
| Nudt7    | -0,22 | 0,842862455 | 0,35  | 0,661976216 | -0,06 | 0,968168854 | -0,06 | 0,909873635 | -0,69 | 0,161041706 |
| Nudt8    | -0,23 | 0,805438081 | -0,37 | 0,467853942 | 0,2   | 0,841669036 | 0,64  | 0,068934318 | -0,17 | 0,826546496 |
| Nudt9    | -0,09 | 0,894641967 | -0,16 | 0,790958831 | -0,17 | 0,878636183 | 0,1   | 0,894580364 | -0,02 | 0,990633766 |
| Nuf2     | -1,73 | 0,074890017 | -1,64 | 0,286908359 | 1,38  | 0,189823768 | 2,68  | 0,003561179 | 0,34  | 0,724669859 |
| Nufip1   | -0,03 | 0,972701787 | -0,17 | 0,818072947 | -0,36 | 0,58611331  | 0,32  | 0,523669806 | 0,14  | 0,888182112 |
| Nufip2   | -0,1  | 0,891986094 | 0,02  | 0,98859071  | -0,12 | 0,920158784 | 0,02  | 0,980890499 | 0,3   | 0,648312151 |
| Nuggc    | 0,13  | 0,856984761 | -0,12 | 0,842663656 | -0,04 | 0,969570532 | 0,48  | 0,447310044 | 0,19  | 0,844157219 |
| Numa1    | -0,29 | 0,557053469 | 0,06  | 0,936429151 | -0,22 | 0,643853175 | -0,7  | 0,218670418 | -0,46 | 0,462558109 |
| Numb     | 0,19  | 0,764824121 | -0,02 | 0,987777411 | -0,08 | 0,926399742 | -0,57 | 0,440786041 | 0,15  | 0,88288747  |
| Numbl    | 0,1   | 0,87350924  | 0,03  | 0,983071427 | 0,39  | 0,64759465  | -0,02 | 0,969377207 | -0,61 | 0,589670454 |
| Nup107   | -0,83 | 0,097122563 | -1,21 | 0,094366643 | 0,68  | 0,179664954 | 0,83  | 0,102967876 | -0,42 | 0,459738349 |
| Nup133   | -0,47 | 0,613990129 | -0,53 | 0,38710682  | 0,37  | 0,659694447 | 0,27  | 0,537565928 | -0,24 | 0,760587652 |
| Nup153   | 0,11  | 0,860985365 | -0,05 | 0,946599376 | 0,34  | 0,579926336 | 0,17  | 0,593206874 | 0,2   | 0,726042963 |
| Nup155   | -0,32 | 0,620468351 | -0,39 | 0,424068004 | 0,58  | 0,303590987 | 0,58  | 0,36184569  | -0,14 | 0,89529118  |
| Nup160   | -0,16 | 0,735860437 | -0,43 | 0,579053234 | 1,21  | 0,046579559 | -0,21 | 0,690659674 | -0,06 | 0,948759136 |
| Nup188   | -0,22 | 0,689991112 | -0,02 | 0,980916182 | 0,87  | 0,150938527 | 0,11  | 0,841103649 | -0,57 | 0,244965154 |
| Nup205   | -0,97 | 0,237786455 | -0,47 | 0,429168189 | 0,46  | 0,406445905 | 1,01  | 0,153884707 | -0,08 | 0,951429597 |
| Nup210   | -0,12 | 0,864598944 | 0,71  | 0,217093794 | 0,2   | 0,824279952 | -0,67 | 0,380919985 | -0,5  | 0,553650211 |

|         |       |             |       |             |       |             |       |             |       |             |
|---------|-------|-------------|-------|-------------|-------|-------------|-------|-------------|-------|-------------|
| Nup210l | 1,06  | 0,124654295 | 0,52  | 0,332829944 | -0,58 | 0,500849254 | 1,02  | 0,23198829  | 0,64  | 0,54877753  |
| Nup214  | -0,1  | 0,843206054 | -0,17 | 0,781046971 | 0,78  | 0,30134516  | 0,04  | 0,967866794 | -0,32 | 0,694779162 |
| Nup35   | -0,08 | 0,944309453 | -0,12 | 0,919088096 | 0,2   | 0,754711637 | 0,14  | 0,861506076 | 0,32  | 0,744907709 |
| Nup37   | -0,24 | 0,813220024 | -0,52 | 0,505612    | 0,82  | 0,321761132 | 1,31  | 0,314738143 | 0,08  | 0,972590168 |
| Nup43   | -0,69 | 0,148685247 | -1,23 | 0,185367049 | 0,29  | 0,715497532 | 0,91  | 0,257827996 | 0,19  | 0,916173996 |
| Nup50   | -0,09 | 0,910211895 | 0,06  | 0,938991098 | 0,06  | 0,940489823 | 0,65  | 0,209734584 | -0,17 | 0,837443824 |
| Nup54   | 0,08  | 0,926316023 | 0,21  | 0,622161495 | 0,32  | 0,62103113  | -0,12 | 0,827461889 | 0,28  | 0,759948291 |
| Nup62   | 0,2   | 0,662416763 | 0,05  | 0,927073711 | 1     | 0,277824119 | 0,4   | 0,200296703 | 0,12  | 0,887392561 |
| Nup62cl | 0,15  | 0,8634587   | -0,14 | 0,832841509 | 0,14  | 0,884597715 | 0,12  | 0,758588473 | -0,42 | 0,410104532 |
| Nup85   | -0,63 | 0,52132136  | -0,69 | 0,208373622 | 0,01  | 0,992201196 | 0,17  | 0,663331435 | -0,43 | 0,442579293 |
| Nup88   | -0,23 | 0,699906083 | -0,33 | 0,563746321 | 0,28  | 0,565711825 | 0,84  | 0,36768429  | 0,33  | 0,77700522  |
| Nup93   | -0,17 | 0,741182094 | -0,04 | 0,970832543 | 0,61  | 0,375756922 | 1,04  | 0,076948205 | -0,13 | 0,891925115 |
| Nup98   | -0,02 | 0,971922167 | -0,02 | 0,97301632  | 0,37  | 0,462643491 | 0,22  | 0,554702047 | 0,2   | 0,726042963 |
| Nupl1   | -0,07 | 0,928103232 | 0,32  | 0,741295705 | 0,16  | 0,882540073 | 0,34  | 0,722309296 | 0,41  | 0,645198541 |
| Nupl2   | -0,24 | 0,86554415  | 0,23  | 0,808498635 | 0,09  | 0,963357998 | 0,41  | 0,81096279  | 0,43  | 0,78512653  |
| Nupr1   | 2,5   | 0,01522448  | 1,95  | 0,046495597 | -0,42 | 0,469791235 | -1,48 | 0,045809254 | 1,11  | 0,092905757 |
| Nupr1l  | -0,14 | 0,760682276 | -0,22 | 0,679757061 | -0,32 | 0,616924301 | -0,74 | 0,36184569  | -0,51 | 0,565817768 |
| Nus1    | -0,18 | 0,683466563 | -0,05 | 0,943915456 | 0,27  | 0,598179126 | 1,56  | 0,008497054 | 0,45  | 0,349150128 |
| Nusap1  | -1,1  | 0,135065204 | -1,44 | 0,230688117 | 1,74  | 0,046133082 | 1,67  | 0,023267289 | -0,04 | 0,975441362 |
| Nutf2   | -0,57 | 0,580610288 | -0,3  | 0,747707816 | 0,34  | 0,65528516  | 0,6   | 0,16683914  | 0,19  | 0,862749128 |
| Nutm1   | 0,02  | 0,98456417  | 0,26  | 0,852719676 | -0,08 | 0,942112992 | -0,13 | 0,910392734 | 0,24  | 0,848977077 |
| Nutm2   | 0,42  | 0,68161851  | 0,31  | 0,674832256 | -0,61 | 0,323246778 | -0,3  | 0,71383199  | 0,01  | 0,99257599  |
| Nvl     | 0,37  | 0,597519827 | -0,16 | 0,88741189  | 0,09  | 0,935978536 | 0,31  | 0,306259977 | 0,34  | 0,64987147  |
| Nwd1    | -0,08 | 0,91526582  | 0,39  | 0,385935063 | 0,07  | 0,949135765 | -1,04 | 0,02631176  | -0,09 | 0,949544475 |
| Nwd2    | 0,27  | 0,681707424 | 0,05  | 0,972706967 | -0,13 | 0,845062212 | 0,54  | 0,203234246 | 0,55  | 0,234282815 |
| Nxf1    | 0,38  | 0,314465089 | 0,02  | 0,969467656 | -0,57 | 0,264885341 | -0,12 | 0,838468247 | 0,24  | 0,739121045 |
| Nxf2    | -0,64 | 0,54401985  | -0,19 | 0,925982374 | -0,08 | 0,957152002 | 0,34  | 0,642906557 | 0,43  | 0,728388857 |
| Nxf3    | -0,04 | 0,950897622 | -0,26 | 0,695689103 | 0,04  | 0,948552385 | 0,17  | 0,72638972  | 0,01  | 0,9939542   |
| Nxf7    | 0,21  | 0,631544171 | 0,31  | 0,858860016 | -0,08 | 0,902672106 | -0,03 | 0,968371235 | -0,1  | 0,910083563 |
| Nxn     | -0,29 | 0,510160603 | -0,36 | 0,389996405 | -0,03 | 0,974887915 | -0,39 | 0,560049354 | -0,4  | 0,59741971  |
| Nxnl1   | 0,24  | 0,606922012 | -0,11 | 0,88928164  | -0,06 | 0,953951069 | -0,16 | 0,757938082 | -0,23 | 0,799292062 |
| Nxnl2   | 0,06  | 0,945705175 | 0,14  | 0,748123243 | -0,07 | 0,940550094 | -0,31 | 0,789516436 | -0,39 | 0,726042963 |
| Nxpe2   | -0,87 | 0,306829062 | -1,25 | 0,151759507 | 0,61  | 0,370386535 | 0,13  | 0,902018542 | 0,27  | 0,820234867 |
| Nxpe3   | 0,29  | 0,652819827 | 0,54  | 0,595287483 | -0,16 | 0,898382247 | 0,54  | 0,483188822 | 1,11  | 0,195405756 |
| Nxpe4   | -0,64 | 0,380490359 | -0,67 | 0,18701686  | 0,28  | 0,838718162 | -0,17 | 0,743093921 | 0,14  | 0,876927228 |

|        |       |             |       |             |       |             |       |             |       |             |
|--------|-------|-------------|-------|-------------|-------|-------------|-------|-------------|-------|-------------|
| Nxpe5  | -0,05 | 0,95538722  | 0,06  | 0,902830091 | -0,08 | 0,911634383 | 0,21  | 0,74563247  | 0,03  | 0,983514531 |
| Nxph1  | -0,05 | 0,958776281 | -0,23 | 0,910193022 | -0,02 | 0,987563007 | 0,08  | 0,92319561  | 0,04  | 0,979392852 |
| Nxph2  | 0,23  | 0,602588901 | 0,23  | 0,641792237 | -0,53 | 0,235638652 | 0,16  | 0,857884225 | -0,03 | 0,97425848  |
| Nxph3  | 0,56  | 0,327334001 | 0,32  | 0,530750017 | -0,67 | 0,201394322 | 0,47  | 0,149660113 | 0,14  | 0,830415283 |
| Nxph4  | -0,01 | 0,993728727 | -0,16 | 0,716668427 | -0,15 | 0,793259393 | 0,17  | 0,69175243  | 0,01  | 0,988324279 |
| Nxt1   | -0,13 | 0,882500171 | 0,24  | 0,732731157 | -0,47 | 0,710981763 | -0,32 | 0,709724394 | 0,09  | 0,917030581 |
| Nxt2   | -0,61 | 0,528010381 | -0,08 | 0,98230594  | -0,89 | 0,48758342  | -0,89 | 0,478731976 | -0,21 | 0,840952901 |
| Nyap1  | -0,02 | 0,973255755 | -0,38 | 0,673817783 | 0,11  | 0,904057901 | 0,13  | 0,80174822  | 0,3   | 0,718299139 |
| Nyap2  | 0,08  | 0,89254634  | -0,04 | 0,966717367 | -0,01 | 0,990836784 | -0,13 | 0,902841605 | -0,25 | 0,824818547 |
| Nynrin | -0,69 | 0,325246268 | -0,21 | 0,894139268 | -0,12 | 0,956894731 | -0,18 | 0,919263182 | -0,21 | 0,907185984 |
| Nyx    | -0,25 | 0,741755443 | -0,14 | 0,782652703 | -0,19 | 0,711793051 | 0,1   | 0,793877243 | 0,17  | 0,858111751 |
| Oacyl  | -0,14 | 0,824964935 | -0,28 | 0,781120603 | 0,3   | 0,706842882 | -0,03 | 0,985633818 | 0,18  | 0,921873336 |
| Oaf    | -0,25 | 0,613387484 | -0,18 | 0,792112243 | 0,24  | 0,729592327 | 3,08  | 0,011555935 | 0,06  | 0,959077429 |
| Oard1  | -0,23 | 0,833262057 | -0,55 | 0,602903981 | -0,48 | 0,717400486 | -0,86 | 0,298021209 | -0,03 | 0,980945466 |
| Oas1a  | 0,59  | 0,448406902 | 0,88  | 0,457889449 | -1,16 | 0,135693106 | -0,94 | 0,038935822 | 1,24  | 0,045304006 |
| Oas1b  | -0,06 | 0,964154899 | 0,44  | 0,244472506 | -0,64 | 0,741438364 | -1,47 | 0,019004226 | 0,54  | 0,549450339 |
| Oas1c  | -1    | 0,184896845 | -0,02 | 0,997499497 | -1,32 | 0,068894819 | -0,65 | 0,611805987 | 0,41  | 0,715879151 |
| Oas1d  | 0,02  | 0,990200396 | -0,25 | 0,817117676 | 0,02  | 0,976874033 | 0,18  | 0,674621783 | 0,27  | 0,628274636 |
| Oas1e  | 0,32  | 0,764288636 | 0,47  | 0,857732355 | -0,16 | 0,899144679 | -0,56 | 0,496055182 | 0,43  | 0,508751714 |
| Oas1f  | 0,4   | 0,587011701 | -0,05 | 0,919602924 | -0,18 | 0,827761588 | -0,12 | 0,872242761 | -0,33 | 0,64578299  |
| Oas1g  | 1,43  | 0,024768323 | 0,93  | 0,311963583 | -0,87 | 0,472273933 | -2,15 | 0,011609447 | 0,82  | 0,136560446 |
| Oas1h  | -0,24 | 0,715991706 | -0,17 | 0,893262563 | -0,13 | 0,875390151 | -0,1  | 0,898546507 | -0,35 | 0,735152891 |
| Oas2   | 1,31  | 0,053789028 | 1,51  | 0,043236689 | -1,29 | 0,101024489 | -0,25 | 0,477652757 | 1,04  | 0,040256196 |
| Oas3   | 0,92  | 0,153824107 | 1,77  | 0,084290601 | -0,97 | 0,295720005 | 1,83  | 0,010324054 | 0,76  | 0,257471362 |
| Oasl1  | 1,15  | 0,104092085 | 1,01  | 0,154882285 | -0,69 | 0,38276819  | 0,08  | 0,887937123 | 1,57  | 0,00635336  |
| Oasl2  | 0,78  | 0,189644465 | 0,69  | 0,191605725 | -1,04 | 0,110812391 | -0,07 | 0,900530968 | 1,19  | 0,024319976 |
| Oat    | -0,24 | 0,663447662 | -0,34 | 0,450076222 | 0,56  | 0,330054927 | -0,05 | 0,929332894 | -0,02 | 0,981640628 |
| Oaz1   | -0,17 | 0,735799425 | -0,05 | 0,96497149  | 0,2   | 0,683917899 | 0,57  | 0,15782952  | 0,3   | 0,545166604 |
| Oaz2   | -0,22 | 0,54401985  | -0,3  | 0,441593532 | -0,05 | 0,959990799 | -0,13 | 0,742706747 | -0,76 | 0,091972445 |
| Oaz3   | -0,29 | 0,578083153 | 0,12  | 0,837500541 | -0,32 | 0,598179126 | -0,14 | 0,73327254  | -0,01 | 0,993925538 |
| Obfc1  | 0,14  | 0,886889675 | -0,38 | 0,687527972 | -0,03 | 0,970969012 | -0,47 | 0,138899159 | 0,05  | 0,952718905 |
| Obox2  | 0,13  | 0,866788377 | -0,15 | 0,898238238 | -0,07 | 0,933080127 | 0,03  | 0,98427899  | -0,27 | 0,864004866 |
| Obox6  | 0,04  | 0,950532575 | -0,05 | 0,936911187 | -0,13 | 0,85092959  | 0,06  | 0,960547981 | 0,03  | 0,978981442 |
| Obox7  | 0,58  | 0,578185633 | 0,02  | 0,996259587 | -0,01 | 0,991456043 | 0,06  | 0,968311421 | 0,42  | 0,497190175 |
| Obp1a  | 0,2   | 0,839375532 | 0,21  | 0,816354863 | 0     | 0,998479176 | 0,07  | 0,955464588 | 0,39  | 0,708533352 |



|         |       |             |       |             |       |             |       |             |       |             |
|---------|-------|-------------|-------|-------------|-------|-------------|-------|-------------|-------|-------------|
| Obp2a   | -0,11 | 0,934802231 | 0,13  | 0,856132795 | -1,27 | 0,409611548 | -0,07 | 0,967866794 | 0,34  | 0,878471553 |
| Obp2b   | -0,29 | 0,732196499 | -0,01 | 0,99074556  | -0,17 | 0,775478253 | -0,04 | 0,947855036 | -0,37 | 0,710864518 |
| Obscn   | 0,08  | 0,88381182  | -0,28 | 0,49761736  | 0,04  | 0,967930981 | 0,2   | 0,587695826 | 0,02  | 0,979392852 |
| Obsl1   | -0,08 | 0,874688734 | 0,27  | 0,549799493 | 0,57  | 0,348183862 | 0,07  | 0,91104652  | 0,07  | 0,928724353 |
| Oc90    | 0,16  | 0,804126753 | 0,08  | 0,912535732 | -0,15 | 0,82672902  | 0,38  | 0,543475623 | 0,23  | 0,793839436 |
| Oca2    | 0,3   | 0,582105374 | -0,85 | 0,405702807 | -0,51 | 0,563934293 | 0,74  | 0,118759429 | 0,02  | 0,982813638 |
| Ocel1   | 0,03  | 0,965116762 | 0,14  | 0,815973308 | 0,37  | 0,531023255 | -1,09 | 0,039195028 | 0,22  | 0,700875396 |
| Ociad1  | 0,06  | 0,895031891 | 0,19  | 0,714590086 | -0,51 | 0,379638471 | 0,19  | 0,671346789 | 0,28  | 0,620399878 |
| Ociad2  | -0,28 | 0,794063226 | 0,07  | 0,940770872 | -0,58 | 0,470379063 | -0,91 | 0,399678653 | -0,11 | 0,948163009 |
| Ocln    | -0,28 | 0,743090353 | -0,19 | 0,783323752 | 0,99  | 0,278260113 | -0,96 | 0,052486821 | -0,23 | 0,813405251 |
| Ocm     | -0,05 | 0,950532575 | -0,06 | 0,940977613 | 0,13  | 0,835677021 | 0,3   | 0,403368451 | 0,42  | 0,493807926 |
| Ocrl    | -0,08 | 0,923035054 | -0,1  | 0,880892852 | -0,03 | 0,977177918 | 0,46  | 0,431136527 | -0,37 | 0,616797608 |
| Ocstamp | 0,2   | 0,840909921 | 0,1   | 0,88741189  | -0,36 | 0,595358351 | 0,19  | 0,587216515 | -0,3  | 0,676132909 |
| Odam    | 0,1   | 0,852179426 | -0,02 | 0,982993454 | 0,04  | 0,947207818 | -0,21 | 0,560806909 | 0,23  | 0,751845698 |
| Odc1    | 0,14  | 0,841584453 | 0,07  | 0,926476797 | -0,23 | 0,825125026 | 0,71  | 0,140538478 | 0,35  | 0,608004947 |
| Odf1    | 0,15  | 0,850962002 | 0,18  | 0,793603525 | -0,22 | 0,634853366 | -0,14 | 0,77073646  | -0,19 | 0,765327693 |
| Odf2    | -0,81 | 0,166372181 | -0,2  | 0,890738011 | 0,72  | 0,431622938 | -0,07 | 0,87811903  | -0,64 | 0,251199318 |
| Odf2l   | 0,66  | 0,20584261  | 0,42  | 0,621112051 | -0,18 | 0,888677583 | 1,05  | 0,449018564 | 0,76  | 0,593298551 |
| Odf3    | -0,17 | 0,751533915 | 0,11  | 0,913777818 | 0,21  | 0,867109522 | 0,29  | 0,748470342 | 0,29  | 0,669061274 |
| Odf3b   | -0,17 | 0,785864159 | -0,12 | 0,800821935 | 0,05  | 0,957193291 | -0,85 | 0,049114771 | -0,51 | 0,324093515 |
| Odf3l1  | 0,09  | 0,911800803 | -0,13 | 0,820806352 | -0,36 | 0,576939208 | 0,31  | 0,567728703 | -0,12 | 0,892349039 |
| Odf3l2  | 0,28  | 0,738448626 | -0,4  | 0,643743213 | 0,01  | 0,994076654 | 0,07  | 0,878757115 | 0,12  | 0,894623317 |
| Odf4    | 0,15  | 0,733130683 | 0,37  | 0,695689103 | 0,21  | 0,82444069  | -0,45 | 0,405337222 | -0,18 | 0,905753594 |
| Ofcc1   | 0,13  | 0,820070818 | 0,09  | 0,892781083 | 0,05  | 0,955303601 | -0,13 | 0,853470813 | 0     | 0,998404699 |
| Ofd1    | -0,36 | 0,625573018 | 0,22  | 0,815397153 | 0,36  | 0,560191012 | 0,02  | 0,968266606 | -0,44 | 0,412193279 |
| Ogdh    | -0,34 | 0,354912365 | -0,52 | 0,437548809 | 0,79  | 0,474190776 | -0,18 | 0,690659674 | -0,4  | 0,455285756 |
| Ogdhl   | -0,12 | 0,808882471 | 0,04  | 0,973945454 | -0,3  | 0,67035251  | 0,18  | 0,805169421 | -0,01 | 0,992694729 |
| Ogfod1  | -0,48 | 0,423859346 | 0,29  | 0,695823136 | 0,15  | 0,923350407 | -0,02 | 0,980883383 | -0,21 | 0,7983507   |
| Ogfod2  | -0,08 | 0,907419323 | 0,13  | 0,850048209 | -0,38 | 0,541363142 | 0     | 0,998710655 | -0,11 | 0,912250982 |
| Ogfod3  | -0,11 | 0,859085937 | -0,8  | 0,123957038 | 0,8   | 0,140524712 | -0,3  | 0,405337222 | -0,27 | 0,673145862 |
| Ogfr    | 0,18  | 0,718996404 | 0,54  | 0,271257402 | -0,33 | 0,640613239 | 1     | 0,352168551 | 1,29  | 0,166657434 |
| Ogfrl1  | 0,04  | 0,971151317 | 0,36  | 0,794036677 | -0,54 | 0,54195729  | -0,59 | 0,37252791  | 0,53  | 0,594109073 |
| Ogg1    | 0,11  | 0,895031891 | 0,22  | 0,80678645  | -0,07 | 0,954229024 | 0,07  | 0,967047406 | 0,31  | 0,783532561 |
| Ogn     | -0,02 | 0,98456417  | 0,02  | 0,967828001 | -0,05 | 0,938291859 | -2    | 0,103691692 | -0,54 | 0,649849091 |
| Ogt     | 0,43  | 0,238140392 | 0     | 1           | -0,55 | 0,446493846 | 0,49  | 0,434295291 | 0,2   | 0,833488713 |

|          |       |             |       |             |       |             |       |             |       |             |
|----------|-------|-------------|-------|-------------|-------|-------------|-------|-------------|-------|-------------|
| Oip5     | -1,2  | 0,326570475 | -1,15 | 0,230688117 | 1,24  | 0,112678193 | 0,89  | 0,220214825 | -0,12 | 0,930287169 |
| Oit1     | -0,18 | 0,834200067 | -0,15 | 0,909329669 | 0,25  | 0,76370647  | 0,1   | 0,916072825 | -0,19 | 0,879075155 |
| Oit3     | -0,12 | 0,865776054 | -0,44 | 0,540404662 | -0,41 | 0,457506381 | -0,73 | 0,625044944 | -1,23 | 0,389664866 |
| Ola1     | -0,47 | 0,457967905 | -0,02 | 0,969314504 | 0,48  | 0,462643491 | 1,39  | 0,143860446 | 0,3   | 0,811321326 |
| Olah     | -0,15 | 0,8102165   | 0,18  | 0,857923266 | -0,19 | 0,727554633 | -0,13 | 0,790046273 | 0,57  | 0,287941355 |
| Olfm1    | 0,96  | 0,157853388 | 1,33  | 0,104971247 | -0,94 | 0,35431494  | 0,61  | 0,176064655 | 1,05  | 0,039082761 |
| Olfm2    | 0,54  | 0,557114011 | -0,43 | 0,613344994 | -0,76 | 0,271482188 | -1,92 | 0,036769299 | -0,37 | 0,771203616 |
| Olfm3    | 0,7   | 0,364243885 | -0,04 | 0,966439343 | -0,29 | 0,714796589 | 0,1   | 0,873610553 | -0,25 | 0,727904814 |
| Olfm4    | 0,35  | 0,470397003 | 0,18  | 0,808222386 | -0,36 | 0,675548701 | -0,05 | 0,944456192 | 0,04  | 0,974110019 |
| Olfm5    | 0,3   | 0,567102759 | -0,19 | 0,790939978 | -0,43 | 0,498063282 | 0,09  | 0,882842038 | -0,07 | 0,930096922 |
| Olfml1   | 0,26  | 0,715610155 | -0,31 | 0,808222835 | -0,08 | 0,943788892 | -0,09 | 0,845767749 | -0,02 | 0,980961333 |
| Olfml2a  | -2,25 | 0,087964503 | -1,23 | 0,335213512 | 1,61  | 0,033751742 | -0,16 | 0,913974287 | -0,57 | 0,666026291 |
| Olfml2b  | -0,46 | 0,586458491 | -0,68 | 0,245562765 | 0,85  | 0,0431152   | 0,83  | 0,419446232 | -0,89 | 0,342250812 |
| Olfml3   | 0,16  | 0,912510949 | 0,22  | 0,903595287 | -0,02 | 0,99407001  | 0,04  | 0,973848105 | -0,36 | 0,697189886 |
| Olfr1    | -0,08 | 0,86264812  | 0,14  | 0,879427032 | -0,03 | 0,963199274 | -0,2  | 0,613598847 | -0,04 | 0,961683196 |
| Olfr10   | 0,15  | 0,852749629 | 0,24  | 0,75380926  | -0,13 | 0,823823322 | 0,14  | 0,744773464 | 0,32  | 0,827032122 |
| Olfr1000 | 0,13  | 0,803761785 | 0,1   | 0,919602924 | 0,22  | 0,661089127 | 0,09  | 0,834439251 | 0,08  | 0,914577351 |
| Olfr1002 | 0     | 0,995778597 | -0,36 | 0,412115816 | -0,25 | 0,598179126 | 0,19  | 0,550371604 | 0,06  | 0,939127163 |
| Olfr1006 | -0,22 | 0,683444889 | 0,21  | 0,832117565 | 0,07  | 0,904132011 | -0,09 | 0,80795564  | -0,09 | 0,931519966 |
| Olfr1008 | 0,03  | 0,959985598 | 0,21  | 0,703923817 | -0,25 | 0,570764191 | 0,16  | 0,667849424 | 0,22  | 0,687384131 |
| Olfr1009 | -0,08 | 0,85617916  | -0,02 | 0,965589332 | 0,14  | 0,793259393 | -0,04 | 0,932315462 | -0,12 | 0,868529339 |
| Olfr101  | 0,12  | 0,882760071 | 1,54  | 0,418913373 | 0,09  | 0,896781875 | -0,2  | 0,72415648  | 0,9   | 0,468521037 |
| Olfr1010 | 0,04  | 0,959985598 | -0,02 | 0,976423495 | -0,09 | 0,910002544 | -0,15 | 0,709570719 | -0,12 | 0,884676277 |
| Olfr1012 | 0,12  | 0,821541936 | 0     | 1           | -0,18 | 0,718448905 | -0,06 | 0,8914104   | 0,19  | 0,739851808 |
| Olfr1013 | 0,13  | 0,764189777 | 0,01  | 0,989873399 | -0,1  | 0,895520077 | -0,04 | 0,927862129 | -0,03 | 0,977903513 |
| Olfr1014 | 0,13  | 0,818587047 | 0,15  | 0,803395544 | -0,04 | 0,955032164 | 0,28  | 0,711725901 | 0,31  | 0,765327693 |
| Olfr1015 | 0,53  | 0,318333634 | 0,84  | 0,643182627 | 0,32  | 0,758434325 | -0,32 | 0,793859164 | -0,86 | 0,442579293 |
| Olfr1016 | -0,09 | 0,857615012 | 0,17  | 0,786394409 | -0,15 | 0,763552205 | 0,06  | 0,890998042 | -0,11 | 0,878966527 |
| Olfr1018 | 0,08  | 0,882119027 | 0,01  | 0,990431899 | -0,13 | 0,819509208 | 0     | 1           | 0,11  | 0,926865262 |
| Olfr1019 | 0,27  | 0,565823399 | 0,06  | 0,906267371 | -0,3  | 0,730021707 | -0,08 | 0,896693685 | 0,25  | 0,682139425 |
| Olfr102  | -0,42 | 0,633758776 | 0,08  | 0,855632384 | -0,27 | 0,684002106 | 0,2   | 0,630159899 | 0,16  | 0,831834722 |
| Olfr1020 | 0,03  | 0,959985598 | -0,11 | 0,830239933 | -0,03 | 0,968874924 | 0,07  | 0,876247018 | 0,21  | 0,720742956 |
| Olfr1022 | -0,11 | 0,846344799 | -0,04 | 0,964875723 | 0,04  | 0,959437564 | 0,22  | 0,598473186 | 0,33  | 0,574285481 |
| Olfr1023 | 0,06  | 0,90799109  | 0,08  | 0,874729703 | -0,07 | 0,919309335 | -0,04 | 0,920158794 | -0,13 | 0,858534673 |
| Olfr1024 | 0     | 0,999536558 | -0,02 | 0,9860901   | 0,07  | 0,937222375 | 0,04  | 0,953420981 | 0,07  | 0,938113617 |

|             |       |             |       |             |       |             |       |             |       |             |
|-------------|-------|-------------|-------|-------------|-------|-------------|-------|-------------|-------|-------------|
| Olfr1026    | -0,06 | 0,898342079 | 0,01  | 0,990011543 | 0,07  | 0,923905002 | -0,21 | 0,62631082  | -0,14 | 0,845872843 |
| Olfr1028    | -0,48 | 0,438932987 | -0,03 | 0,98230594  | -0,35 | 0,525516245 | -0,28 | 0,583477801 | 0     | 0,99589352  |
| Olfr1029    | 0,07  | 0,903666411 | 0,04  | 0,956832376 | -0,18 | 0,715497532 | -0,08 | 0,883425466 | -0,27 | 0,723861142 |
| Olfr1030    | 0     | 0,995150704 | 0,1   | 0,822040275 | -0,14 | 0,81425417  | -0,45 | 0,60273248  | -0,61 | 0,578281855 |
| Olfr1031    | 0,29  | 0,743485447 | 0,23  | 0,724572503 | -0,11 | 0,911634383 | -0,07 | 0,900918368 | -0,14 | 0,835191    |
| Olfr1032    | -0,04 | 0,933058893 | -0,01 | 0,982786635 | -0,09 | 0,887630371 | -0,11 | 0,76830702  | -0,11 | 0,86809582  |
| Olfr1033    | 0     | 0,99810112  | 0,12  | 0,845663274 | -0,22 | 0,724294108 | -0,17 | 0,62784815  | 0,05  | 0,957376482 |
| Olfr1034    | -0,57 | 0,154447523 | -0,14 | 0,781665479 | 0,2   | 0,767822182 | 0,11  | 0,926404641 | -0,2  | 0,904836805 |
| Olfr1036    | 0,08  | 0,869946494 | 0,26  | 0,715687908 | -0,05 | 0,952625683 | -0,12 | 0,797123056 | 0,12  | 0,902899311 |
| Olfr1037    | 0,02  | 0,979625837 | 0,21  | 0,739345787 | 0     | 0,998479656 | -0,32 | 0,582827953 | 0,34  | 0,668747774 |
| Olfr1038-ps | -0,09 | 0,826266305 | 0,06  | 0,899624796 | -0,22 | 0,755403453 | -0,15 | 0,686362858 | -0,13 | 0,866802448 |
| Olfr1039    | -0,02 | 0,981400637 | 0,2   | 0,612662008 | -0,29 | 0,637321546 | -0,11 | 0,775780803 | 0,09  | 0,899196564 |
| Olfr1040    | -0,04 | 0,9647788   | -0,05 | 0,919320382 | -0,21 | 0,702423238 | -0,03 | 0,944330133 | 0,07  | 0,932742551 |
| Olfr1042    | 0,13  | 0,843970274 | 0,98  | 0,30567226  | -0,57 | 0,778707372 | -0,46 | 0,455343866 | 0,14  | 0,835817348 |
| Olfr1043    | -0,05 | 0,930710746 | -0,03 | 0,962138182 | -0,04 | 0,959990799 | -0,01 | 0,983166423 | -0,07 | 0,926514899 |
| Olfr1044    | -0,23 | 0,61897512  | -0,11 | 0,818889977 | 0,05  | 0,950862176 | 0,2   | 0,604842873 | 0,32  | 0,583279373 |
| Olfr1045    | 0,11  | 0,889867231 | -0,04 | 0,932292974 | 0,12  | 0,8785896   | -0,06 | 0,885913289 | -0,01 | 0,989300476 |
| Olfr1046    | 0,1   | 0,861766061 | 0,11  | 0,812459283 | 0,12  | 0,864598204 | 0,01  | 0,982401165 | 0,18  | 0,78369432  |
| Olfr1047    | 0,08  | 0,925148331 | 0,08  | 0,911815749 | 0     | 0,997220401 | 0,02  | 0,972627967 | 0,26  | 0,719122515 |
| Olfr1048    | -0,22 | 0,543369683 | -0,11 | 0,805620382 | -0,03 | 0,968477839 | 0,05  | 0,906588327 | -0,09 | 0,912733818 |
| Olfr1049    | 0,2   | 0,761109323 | 0,22  | 0,805447658 | -0,17 | 0,729031049 | -0,08 | 0,830758796 | 0,32  | 0,537590834 |
| Olfr1051    | 0,16  | 0,765464964 | -0,09 | 0,839789639 | -0,19 | 0,707539555 | 0,15  | 0,77077388  | -0,03 | 0,976343903 |
| Olfr1052    | 0     | 0,999652707 | -0,13 | 0,858860016 | -0,24 | 0,695635711 | 0,01  | 0,99017416  | 0     | 0,997106233 |
| Olfr1053    | -0,07 | 0,934585532 | 0,06  | 0,935329426 | -0,1  | 0,874639384 | 0,06  | 0,910980872 | 0,36  | 0,520314212 |
| Olfr1054    | 0,04  | 0,958188047 | -0,12 | 0,808168923 | -0,17 | 0,743901409 | -0,04 | 0,952615547 | 0,19  | 0,832848337 |
| Olfr1055    | -0,2  | 0,693792665 | 0,12  | 0,786394409 | -0,07 | 0,910260857 | -0,05 | 0,915654325 | 0,1   | 0,909363599 |
| Olfr1056    | 0,28  | 0,573557207 | 0,39  | 0,538642201 | 0,01  | 0,99394877  | -0,03 | 0,94180692  | 0,58  | 0,255254959 |
| Olfr1057    | 0,07  | 0,903102299 | 0,13  | 0,854906955 | 0,06  | 0,923668578 | 0,16  | 0,676740124 | 0,29  | 0,757674948 |
| Olfr1058    | 0,3   | 0,553314976 | 0,16  | 0,722938629 | -0,02 | 0,985347628 | 0,06  | 0,907425361 | 0,12  | 0,864166878 |
| Olfr1061    | 0,05  | 0,951641891 | -0,38 | 0,344890637 | -0,25 | 0,661445401 | -0,15 | 0,733028982 | -0,39 | 0,570939418 |
| Olfr1062    | 0,22  | 0,593540946 | 0,17  | 0,882931058 | -0,14 | 0,854599398 | -0,04 | 0,961963439 | -0,06 | 0,95587699  |
| Olfr1065    | -0,15 | 0,761425175 | -0,02 | 0,993789602 | -0,32 | 0,647928093 | 0,12  | 0,879527088 | 0     | 0,997070668 |
| Olfr1066    | 0,05  | 0,932485025 | -0,3  | 0,700559743 | 0,13  | 0,841669036 | 0,01  | 0,996714438 | 0,05  | 0,961749007 |
| Olfr107     | 0,25  | 0,546449654 | -0,02 | 0,981441793 | -0,02 | 0,984624932 | 0,15  | 0,695232035 | 0,02  | 0,979456872 |
| Olfr1076    | 0,21  | 0,62611802  | 0,11  | 0,859295689 | -0,03 | 0,973732268 | -0,1  | 0,840911664 | 0,04  | 0,965348932 |

|          |       |             |       |             |       |             |       |             |       |             |
|----------|-------|-------------|-------|-------------|-------|-------------|-------|-------------|-------|-------------|
| Olfr108  | 0,05  | 0,954010341 | -0,01 | 0,994486533 | 0,29  | 0,675674731 | 0,17  | 0,667849424 | -0,09 | 0,913553402 |
| Olfr1080 | 0,03  | 0,965703244 | 0,03  | 0,950654933 | -0,04 | 0,957152002 | 0,02  | 0,966196518 | 0,05  | 0,961406182 |
| Olfr1082 | 0,07  | 0,914090929 | 0,07  | 0,881113709 | -0,08 | 0,896728577 | -0,14 | 0,688800416 | 0,04  | 0,96963338  |
| Olfr1084 | 0,33  | 0,468384373 | -0,01 | 0,996865461 | 0,24  | 0,712697139 | 0,06  | 0,943038183 | 0     | 0,994865893 |
| Olfr1085 | -0,02 | 0,979439932 | 0,07  | 0,883145635 | 0,11  | 0,899913569 | -0,35 | 0,494684935 | 0     | 0,999455919 |
| Olfr1086 | 0,03  | 0,965991176 | 0,23  | 0,664787536 | -0,1  | 0,891482131 | -0,18 | 0,64943056  | 0,04  | 0,962820357 |
| Olfr1087 | 0,11  | 0,824044892 | 0,05  | 0,923174593 | 0,08  | 0,899629874 | -0,07 | 0,869148815 | -0,03 | 0,976743304 |
| Olfr1089 | 0,24  | 0,565823399 | -0,05 | 0,911148146 | 0,02  | 0,985275325 | 0,04  | 0,932803079 | 0,17  | 0,8311636   |
| Olfr109  | -0,04 | 0,931614598 | 0     | 1           | -0,02 | 0,977827235 | 0,05  | 0,912321015 | -0,1  | 0,88282824  |
| Olfr1090 | 0,08  | 0,894555208 | -0,09 | 0,859332983 | -0,03 | 0,976042637 | -0,07 | 0,892186579 | 0,14  | 0,825697364 |
| Olfr1093 | -0,09 | 0,867243066 | 0,15  | 0,89081665  | -0,03 | 0,967767582 | 0,24  | 0,613204894 | -0,1  | 0,928671864 |
| Olfr1094 | -0,07 | 0,90685932  | 0,14  | 0,806456132 | -0,03 | 0,979791644 | -0,08 | 0,883059585 | -0,2  | 0,765340194 |
| Olfr1095 | 0,01  | 0,991919022 | -0,06 | 0,897645724 | -0,15 | 0,817272649 | -0,06 | 0,886539168 | -0,45 | 0,459055099 |
| Olfr1097 | 0,23  | 0,620185424 | 0,04  | 0,963168371 | -0,01 | 0,993379272 | -0,21 | 0,624359865 | -0,3  | 0,623304657 |
| Olfr1098 | 0,02  | 0,981777139 | 0,56  | 0,530022884 | 0,04  | 0,955245684 | -0,08 | 0,868841486 | 0,33  | 0,628728585 |
| Olfr1099 | 0,05  | 0,923820085 | -0,31 | 0,467853942 | -0,03 | 0,963357998 | 0,23  | 0,720014407 | 0,01  | 0,991980521 |
| Olfr11   | 0,06  | 0,892124736 | 0     | 1           | -0,3  | 0,674883238 | -0,05 | 0,912976622 | -0,11 | 0,873087632 |
| Olfr110  | -0,16 | 0,793666336 | 0,11  | 0,880892852 | 0,18  | 0,852249671 | 0,26  | 0,712869858 | 0,49  | 0,506316926 |
| Olfr1100 | 0,03  | 0,953003466 | 0,03  | 0,965458115 | -0,04 | 0,965656549 | 0,18  | 0,65601715  | 0,21  | 0,715852506 |
| Olfr1101 | 0,39  | 0,655130976 | -0,2  | 0,762588576 | 0,06  | 0,929155794 | 0,07  | 0,848013758 | 0,02  | 0,980961333 |
| Olfr1102 | 0,07  | 0,932654105 | -0,02 | 0,981758111 | -0,12 | 0,88783743  | -0,06 | 0,921731995 | 0,09  | 0,902802615 |
| Olfr1104 | -0,18 | 0,753974253 | -0,02 | 0,967093709 | 0,1   | 0,867020304 | 0,07  | 0,866063732 | -0,29 | 0,638868989 |
| Olfr1105 | 0,08  | 0,904039733 | 0,18  | 0,774089094 | -0,07 | 0,917694073 | -0,05 | 0,893609448 | -0,16 | 0,793952361 |
| Olfr1106 | 0,17  | 0,707440816 | 0,02  | 0,965147491 | -0,17 | 0,816816524 | 0,04  | 0,930052376 | 0,22  | 0,726349309 |
| Olfr1107 | 0,08  | 0,909477787 | 0,17  | 0,756778611 | 0,05  | 0,954550124 | -0,07 | 0,914795452 | 0,21  | 0,80625253  |
| Olfr1109 | 0,52  | 0,36631183  | 0,13  | 0,78280538  | -0,11 | 0,900888718 | 0,13  | 0,804523313 | 0,12  | 0,860939346 |
| Olfr111  | 0,12  | 0,857594729 | 0,14  | 0,798741467 | 0,24  | 0,599364835 | 0,24  | 0,561974365 | 0,07  | 0,937558003 |
| Olfr1111 | 0,05  | 0,932531737 | -0,04 | 0,930192503 | -0,11 | 0,841563482 | 0     | 1           | 0,14  | 0,831146741 |
| Olfr1112 | -0,16 | 0,70453516  | -0,13 | 0,755498335 | -0,36 | 0,398389729 | 0,17  | 0,661916932 | 0,11  | 0,880134862 |
| Olfr1113 | 0,18  | 0,74764092  | -0,06 | 0,939215878 | -0,03 | 0,963357998 | -0,1  | 0,832066127 | -0,03 | 0,969617491 |
| Olfr1115 | 0,14  | 0,808555679 | 0,05  | 0,909735125 | -0,29 | 0,545894079 | 0     | 1           | 0,23  | 0,671993517 |
| Olfr1116 | 0,1   | 0,867664049 | -0,01 | 0,993846491 | -0,16 | 0,821984166 | 0,05  | 0,935460611 | -0,07 | 0,928546502 |
| Olfr1118 | -0,02 | 0,981400637 | 0,06  | 0,901340885 | -0,02 | 0,979581886 | -0,02 | 0,963343418 | 0,07  | 0,93367447  |
| Olfr112  | -0,07 | 0,884230844 | 0,29  | 0,775914311 | -0,25 | 0,758158004 | -0,36 | 0,466887908 | 0,04  | 0,978972169 |
| Olfr1120 | 0     | 0,999288019 | 0,05  | 0,918400751 | -0,16 | 0,777417583 | -0,16 | 0,687911064 | -0,12 | 0,865866242 |

|           |       |             |       |             |       |             |       |             |       |             |
|-----------|-------|-------------|-------|-------------|-------|-------------|-------|-------------|-------|-------------|
| Olfr1 121 | 0,15  | 0,75819156  | 0,14  | 0,828498885 | -0,04 | 0,957327097 | -0,05 | 0,912516335 | 0,17  | 0,827104937 |
| Olfr1 122 | 0,05  | 0,947117278 | 0,12  | 0,891099    | -0,17 | 0,870215287 | 0,37  | 0,705685382 | 0,32  | 0,725587145 |
| Olfr1 123 | -0,1  | 0,840882072 | -0,3  | 0,649611595 | -0,03 | 0,973732268 | 0,14  | 0,725283496 | 0,08  | 0,912250982 |
| Olfr1 124 | -0,04 | 0,94881239  | 0,07  | 0,887493001 | -0,16 | 0,752864637 | 0,14  | 0,744531065 | 0,05  | 0,959573673 |
| Olfr1 126 | 0,05  | 0,923035054 | 0,11  | 0,807100558 | -0,1  | 0,875714796 | -0,03 | 0,937627059 | 0,03  | 0,977967676 |
| Olfr1 128 | -0,15 | 0,737459992 | -0,15 | 0,756778611 | 0,18  | 0,78984366  | 0,37  | 0,322564589 | -0,03 | 0,979456872 |
| Olfr1 129 | -0,11 | 0,936611783 | 0,11  | 0,844902757 | -0,07 | 0,932677966 | -0,08 | 0,899335603 | -0,16 | 0,80222716  |
| Olfr1 13  | 0,18  | 0,70137787  | 0,66  | 0,16219325  | 0,01  | 0,994572791 | -0,41 | 0,291810264 | 0,17  | 0,816435488 |
| Olfr1 130 | 0,64  | 0,414026998 | 0,05  | 0,962717715 | -0,31 | 0,660920525 | -0,74 | 0,642848625 | -0,62 | 0,639451374 |
| Olfr1 131 | 0,16  | 0,822107047 | -0,2  | 0,716668427 | 0,19  | 0,824306509 | 0,16  | 0,679886975 | 0,15  | 0,871015717 |
| Olfr1 132 | 0,47  | 0,69656531  | 0,18  | 0,855632384 | 0,1   | 0,876217183 | -0,05 | 0,939446012 | 0,05  | 0,957423671 |
| Olfr1 133 | -0,19 | 0,707480624 | -0,16 | 0,842953835 | -0,01 | 0,994527859 | -0,11 | 0,900691702 | 0,05  | 0,962442464 |
| Olfr1 134 | 0,33  | 0,488619512 | 0,07  | 0,919873208 | -0,12 | 0,856605654 | -0,13 | 0,786750698 | 0,2   | 0,773125975 |
| Olfr1 135 | 0,24  | 0,592989013 | 0,01  | 0,994913034 | -0,01 | 0,993379272 | -0,04 | 0,949048857 | -0,08 | 0,912250982 |
| Olfr1 136 | 0,17  | 0,773356367 | 0,04  | 0,974702154 | 0,11  | 0,872900604 | -0,01 | 0,994661585 | -0,11 | 0,912250982 |
| Olfr1 137 | 0,12  | 0,782889069 | 0,09  | 0,866844066 | 0,03  | 0,958851839 | -0,01 | 0,982212444 | -0,1  | 0,890957032 |
| Olfr1 138 | -0,1  | 0,829299665 | -0,01 | 0,995205602 | 0,04  | 0,952366216 | 0,3   | 0,324591518 | -0,03 | 0,973162988 |
| Olfr1 14  | 0,35  | 0,491560172 | 0,23  | 0,738398576 | 0,03  | 0,972779161 | 0,18  | 0,696558026 | 0,3   | 0,561145857 |
| Olfr1 140 | 0,1   | 0,898129222 | -0,1  | 0,883093763 | -0,22 | 0,834069966 | 0,31  | 0,437001704 | 0     | 0,999572304 |
| Olfr1 141 | -0,39 | 0,458591721 | -0,21 | 0,703929085 | -0,05 | 0,941056703 | 0,2   | 0,793438229 | 0,19  | 0,839260365 |
| Olfr1 143 | 0,1   | 0,857971313 | -0,05 | 0,927367017 | 0,02  | 0,977544176 | -0,03 | 0,965653854 | -0,12 | 0,887719506 |
| Olfr1 145 | 0,07  | 0,877312739 | 0,04  | 0,935329426 | -0,01 | 0,99407001  | 0,02  | 0,965524724 | 0,19  | 0,729208209 |
| Olfr1 148 | -0,06 | 0,935703794 | 0,05  | 0,931100468 | -0,1  | 0,869020978 | 0,05  | 0,943143586 | 0,34  | 0,574285481 |
| Olfr1 151 | -0,15 | 0,789158376 | -0,42 | 0,594415097 | -0,34 | 0,520931071 | 0,52  | 0,398422441 | -0,12 | 0,873998679 |
| Olfr1 152 | 0,7   | 0,654363277 | -0,18 | 0,787285346 | -0,01 | 0,993379272 | 0,07  | 0,863186484 | 0,15  | 0,830788023 |
| Olfr1 153 | 0,41  | 0,456603923 | 0,04  | 0,935329426 | -0,51 | 0,372394495 | -0,21 | 0,589510349 | 0,24  | 0,716229308 |
| Olfr1 154 | -0,04 | 0,968370059 | 0,12  | 0,809683705 | -0,07 | 0,929155794 | 0,1   | 0,812415527 | 0,01  | 0,990839896 |
| Olfr1 155 | 0,03  | 0,970938013 | -0,14 | 0,767178812 | -0,16 | 0,776071062 | 0,2   | 0,6447962   | 0,03  | 0,975441362 |
| Olfr1 156 | 0,02  | 0,972112267 | 0,14  | 0,756778611 | 0,11  | 0,847223474 | -0,28 | 0,40199632  | -0,2  | 0,730951829 |
| Olfr1 157 | 0,15  | 0,840446684 | 0,22  | 0,805467498 | -0,11 | 0,878636183 | -0,05 | 0,9579816   | 0,11  | 0,92741476  |
| Olfr1 158 | 0,33  | 0,496008309 | -0,23 | 0,724005117 | -0,45 | 0,51127708  | 0,28  | 0,575492019 | 0,09  | 0,946185373 |
| Olfr1 16  | 0,01  | 0,996219097 | -0,06 | 0,961370411 | -0,14 | 0,863458267 | -0,1  | 0,865656073 | 0,11  | 0,896355106 |
| Olfr1 160 | 0,02  | 0,983516046 | 0,03  | 0,977238901 | 0,01  | 0,985326269 | -0,07 | 0,903419802 | -0,01 | 0,992406971 |
| Olfr1 161 | -0,01 | 0,986904999 | -0,01 | 0,997700959 | 0,13  | 0,816883729 | -0,05 | 0,921731995 | -0,1  | 0,881968395 |
| Olfr1 162 | 0,31  | 0,521257161 | -0,04 | 0,940633551 | -0,23 | 0,696737432 | 0,25  | 0,496533512 | 0,1   | 0,909363599 |

|             |       |             |       |             |       |             |       |             |       |             |
|-------------|-------|-------------|-------|-------------|-------|-------------|-------|-------------|-------|-------------|
| Olfr1163    | -0,46 | 0,385512506 | -0,05 | 0,946599376 | 0     | 0,997394645 | 0,25  | 0,592457782 | 0,03  | 0,980961333 |
| Olfr1164    | 0     | 0,996998625 | -0,17 | 0,776548278 | 0,02  | 0,984879454 | 0,16  | 0,659409324 | 0,17  | 0,821727352 |
| Olfr1166    | -0,04 | 0,952540667 | -0,09 | 0,850776298 | -0,3  | 0,471288457 | -0,07 | 0,870561962 | 0,08  | 0,928671864 |
| Olfr1167    | -0,34 | 0,716985606 | 1,07  | 0,582478031 | -0,74 | 0,579159818 | -0,4  | 0,539550126 | 0,16  | 0,901183842 |
| Olfr1168    | 0,09  | 0,91960004  | 0,24  | 0,689957982 | -0,51 | 0,568984164 | -0,25 | 0,442387288 | -0,14 | 0,823098095 |
| Olfr117     | -0,06 | 0,895871179 | 0     | 1           | -0,17 | 0,752157341 | -0,02 | 0,970731295 | -0,06 | 0,947559952 |
| Olfr1170    | 0,83  | 0,655130976 | 0,06  | 0,914970476 | 0,1   | 0,886600095 | -0,03 | 0,954312136 | -0,05 | 0,949328366 |
| Olfr1173    | 0,05  | 0,921115842 | 0,05  | 0,937348524 | -0,16 | 0,823823322 | 0,08  | 0,84549895  | 0,07  | 0,927517199 |
| Olfr1174-ps | 0,08  | 0,869565514 | -0,07 | 0,884434898 | -0,13 | 0,846176253 | 0,13  | 0,734034893 | 0,13  | 0,82955824  |
| Olfr1176    | -0,07 | 0,877312739 | 0,19  | 0,764406705 | 0,07  | 0,910151906 | -0,45 | 0,37252791  | 0,02  | 0,982175252 |
| Olfr1178    | -0,01 | 0,993728727 | 0,12  | 0,809683705 | 0,15  | 0,798107953 | 0,16  | 0,661916932 | 0,15  | 0,858534673 |
| Olfr1179    | 0     | 0,998027251 | -0,08 | 0,882847123 | -0,14 | 0,828129261 | -0,11 | 0,766621599 | 0     | 0,995918051 |
| Olfr118     | 0,04  | 0,956980086 | 0,22  | 0,726494244 | -0,18 | 0,783006    | 0,01  | 0,976464748 | -0,06 | 0,946133906 |
| Olfr1180    | 0,45  | 0,305893528 | -0,41 | 0,40873647  | 0,03  | 0,970992385 | 0,01  | 0,988205241 | 0,22  | 0,825966687 |
| Olfr1181    | 0,33  | 0,613990129 | -0,16 | 0,725783826 | 0,19  | 0,715497532 | 0,02  | 0,958172386 | -0,08 | 0,916900441 |
| Olfr1182    | 0,31  | 0,46691413  | -0,02 | 0,983071427 | -0,37 | 0,470650375 | 0,23  | 0,523255995 | 0,23  | 0,712793529 |
| Olfr1183    | -0,04 | 0,967225725 | 0,19  | 0,694017753 | -0,05 | 0,94930407  | -0,41 | 0,191243536 | -0,1  | 0,893786534 |
| Olfr1184    | 0,09  | 0,888840601 | -0,26 | 0,694017753 | 0,02  | 0,979581886 | 0,02  | 0,959566803 | -0,35 | 0,51509981  |
| Olfr1186    | -0,15 | 0,757499328 | -0,01 | 0,987207919 | -0,06 | 0,931899359 | 0,07  | 0,86408846  | -0,06 | 0,934242963 |
| Olfr1188    | 0,06  | 0,951710261 | 0,15  | 0,846432276 | -0,34 | 0,451021446 | -0,04 | 0,930079385 | 0,38  | 0,546223558 |
| Olfr1189    | -0,11 | 0,865055523 | -0,05 | 0,914952205 | -0,19 | 0,733423502 | 0,07  | 0,858956727 | 0,13  | 0,874554354 |
| Olfr119     | -0,28 | 0,865689677 | 0,07  | 0,970221003 | 0,21  | 0,925417014 | -0,22 | 0,7178715   | -0,56 | 0,316401979 |
| Olfr1193    | 0     | 1           | 0,07  | 0,877770697 | 0,04  | 0,95106142  | 0,09  | 0,845813504 | -0,22 | 0,698635781 |
| Olfr1195    | 0     | 0,998769353 | -0,09 | 0,875296321 | -0,14 | 0,78534601  | 0,09  | 0,820466863 | 0,05  | 0,948163009 |
| Olfr1196    | -0,04 | 0,943730947 | -0,44 | 0,664787536 | -0,07 | 0,939067138 | 0,16  | 0,796302577 | -0,13 | 0,876121508 |
| Olfr1197    | 0,09  | 0,840909921 | -0,03 | 0,956049982 | 0,09  | 0,913639858 | 0     | 1           | 0     | 0,997044214 |
| Olfr1198    | 0,2   | 0,648730873 | 0     | 0,998239324 | -0,21 | 0,675674731 | 0,13  | 0,733213704 | 0,16  | 0,788761628 |
| Olfr12      | 0,37  | 0,54401985  | 0,03  | 0,95021587  | -0,06 | 0,936826369 | -0,31 | 0,451686955 | 0,15  | 0,826206511 |
| Olfr120     | 0,27  | 0,682102965 | 0,03  | 0,978547588 | -0,31 | 0,557758269 | -0,01 | 0,986161899 | -0,07 | 0,943668392 |
| Olfr1200    | 0,11  | 0,820023436 | -0,09 | 0,848912129 | -0,11 | 0,859460126 | -0,01 | 0,981754717 | 0,09  | 0,90768     |
| Olfr1201    | -0,01 | 0,980808737 | -0,12 | 0,807175471 | 0,08  | 0,91560558  | -0,09 | 0,805452009 | -0,01 | 0,992406971 |
| Olfr1204    | -0,02 | 0,972667767 | 0,03  | 0,960819228 | -0,11 | 0,853538508 | 0,01  | 0,992365775 | -0,04 | 0,955137605 |
| Olfr1205    | 0,04  | 0,944291635 | 0     | 1           | -0,16 | 0,83790457  | -0,06 | 0,919126119 | -0,28 | 0,681597394 |
| Olfr1206    | -0,11 | 0,832350641 | -0,01 | 0,993800088 | -0,01 | 0,996006132 | -0,08 | 0,839621573 | 0,13  | 0,848955614 |
| Olfr1208    | -0,24 | 0,683531628 | -0,02 | 0,989873399 | 0,04  | 0,967930981 | 0,09  | 0,856502643 | 0,58  | 0,649832285 |

|          |       |             |       |             |       |             |       |             |       |             |
|----------|-------|-------------|-------|-------------|-------|-------------|-------|-------------|-------|-------------|
| Olfr1209 | -0,07 | 0,923035054 | 0,05  | 0,914229678 | 0,09  | 0,871283127 | -0,24 | 0,500410075 | -0,24 | 0,673577848 |
| Olfr121  | -0,07 | 0,949362206 | 0,28  | 0,785573503 | -0,3  | 0,683975246 | -0,51 | 0,233416438 | -0,07 | 0,939948423 |
| Olfr1211 | 0,48  | 0,324465563 | -0,12 | 0,881171171 | -0,45 | 0,324835763 | 0,16  | 0,848930763 | 0,16  | 0,899196564 |
| Olfr1212 | 0,32  | 0,559636965 | 0,08  | 0,938233008 | 0,18  | 0,771848202 | 0,03  | 0,963307399 | -0,26 | 0,64934615  |
| Olfr1213 | -0,01 | 0,995091369 | -0,23 | 0,82121052  | -0,09 | 0,915096866 | 0,18  | 0,696196159 | 0,23  | 0,684349871 |
| Olfr1214 | -0,18 | 0,662948451 | 0,09  | 0,832841509 | -0,1  | 0,882540073 | -0,02 | 0,978056041 | 0,15  | 0,82489595  |
| Olfr1215 | 0,29  | 0,501390979 | -0,12 | 0,813541606 | -0,18 | 0,740600774 | 0,1   | 0,789931282 | 0,04  | 0,96923842  |
| Olfr1216 | 0,04  | 0,932324918 | 0,08  | 0,857874036 | 0,13  | 0,828582667 | -0,02 | 0,968211182 | -0,16 | 0,797293554 |
| Olfr1217 | -0,2  | 0,69258782  | 0,37  | 0,620236896 | 0,02  | 0,977827235 | 0,04  | 0,921731995 | -0,01 | 0,99428834  |
| Olfr1218 | 0,08  | 0,865776054 | 0,23  | 0,563431484 | -0,21 | 0,665094542 | 0,05  | 0,903744147 | 0,01  | 0,992997824 |
| Olfr1219 | 0,02  | 0,981777139 | -0,04 | 0,941732128 | -0,03 | 0,977081417 | 0,15  | 0,729857506 | 0,02  | 0,982321176 |
| Olfr122  | 0,41  | 0,520667704 | 0,19  | 0,924525687 | 0,29  | 0,732675311 | -0,36 | 0,309853726 | -0,16 | 0,859666678 |
| Olfr1220 | 0,09  | 0,933689638 | 0,12  | 0,920204975 | -0,54 | 0,379638471 | -0,07 | 0,9624906   | 0,22  | 0,885318142 |
| Olfr1222 | -0,15 | 0,76714951  | 0,07  | 0,88928164  | -0,07 | 0,90672161  | 0,08  | 0,831151724 | -0,16 | 0,794253181 |
| Olfr1223 | -0,23 | 0,862124608 | 0,1   | 0,955475499 | -0,39 | 0,524041708 | -0,23 | 0,864379203 | -0,09 | 0,961749007 |
| Olfr1225 | 0,29  | 0,504081209 | 0,1   | 0,923044405 | -0,11 | 0,868312046 | -0,09 | 0,881073643 | 0,08  | 0,944241841 |
| Olfr1226 | 0     | 0,997842309 | 0,03  | 0,958545812 | -0,01 | 0,990836784 | 0,61  | 0,093115798 | 0,23  | 0,710143859 |
| Olfr1228 | 0,03  | 0,964154899 | 0,25  | 0,845244046 | 0,11  | 0,864598204 | -0,56 | 0,308272286 | 0,09  | 0,949178165 |
| Olfr123  | 0,04  | 0,933815936 | -0,13 | 0,816723225 | 0     | 0,997268369 | 0,32  | 0,39058196  | 0,09  | 0,902899311 |
| Olfr1230 | 0     | 0,99460683  | -0,13 | 0,823246376 | -0,12 | 0,814575035 | -0,03 | 0,949048857 | -0,1  | 0,916765612 |
| Olfr1231 | 0,32  | 0,577560666 | -0,18 | 0,714876659 | -0,03 | 0,962216849 | -0,37 | 0,675137201 | 0,17  | 0,865938897 |
| Olfr1232 | 0,28  | 0,535827944 | 0     | 0,999395995 | -0,04 | 0,965656549 | -0,12 | 0,797527363 | -0,15 | 0,81954505  |
| Olfr1233 | 0,15  | 0,774822327 | 0     | 1           | -0,18 | 0,723896318 | -0,01 | 0,984351412 | -0,12 | 0,86811326  |
| Olfr1234 | 0,17  | 0,69656531  | -0,11 | 0,869495185 | -0,05 | 0,94665439  | 0,23  | 0,672571582 | -0,19 | 0,813330134 |
| Olfr1238 | 0,12  | 0,856118781 | -0,13 | 0,786074087 | -0,01 | 0,988891194 | 0,06  | 0,903739255 | -0,32 | 0,6441349   |
| Olfr1239 | 0,03  | 0,958395861 | -0,04 | 0,940156926 | 0,14  | 0,825914825 | -0,06 | 0,93355189  | -0,16 | 0,845218636 |
| Olfr124  | -0,26 | 0,617087012 | 0,19  | 0,707071624 | -0,15 | 0,777417583 | 0,01  | 0,984136649 | 0,18  | 0,767842676 |
| Olfr1240 | 0,06  | 0,950897622 | -0,15 | 0,874049742 | -0,04 | 0,973006385 | 0,26  | 0,611632616 | 0,13  | 0,893117638 |
| Olfr1241 | -0,29 | 0,510164315 | 0     | 1           | -0,17 | 0,720377272 | -0,16 | 0,722766722 | 0,21  | 0,713599145 |
| Olfr1245 | -0,15 | 0,793209485 | 0,17  | 0,732847182 | -0,14 | 0,829685771 | -0,06 | 0,926351352 | -0,21 | 0,775907179 |
| Olfr1246 | -0,23 | 0,725457737 | 0,22  | 0,70205441  | 0,09  | 0,919116989 | -0,44 | 0,375830483 | -0,19 | 0,803566512 |
| Olfr1247 | -0,19 | 0,717407143 | 0,2   | 0,703558337 | 0,09  | 0,904057901 | 0,05  | 0,943143586 | 0,22  | 0,707546356 |
| Olfr1248 | 0,16  | 0,717407143 | 0,04  | 0,937396327 | -0,11 | 0,862480223 | 0,25  | 0,550724115 | 0,05  | 0,961406182 |
| Olfr1249 | -0,11 | 0,806353432 | -0,07 | 0,91472637  | -0,05 | 0,952518202 | -0,28 | 0,601504444 | -0,11 | 0,906016567 |
| Olfr125  | 0,03  | 0,965482773 | 0,14  | 0,755498335 | -0,14 | 0,779859477 | -0,25 | 0,406068033 | 0,02  | 0,980961333 |

|             |       |             |       |             |       |             |       |             |       |             |
|-------------|-------|-------------|-------|-------------|-------|-------------|-------|-------------|-------|-------------|
| Olfr1251    | 0,11  | 0,829070578 | -0,22 | 0,589051408 | -0,1  | 0,875385259 | -0,11 | 0,805452009 | -0,24 | 0,699996356 |
| Olfr1252    | 0,06  | 0,899663752 | 0,15  | 0,754578715 | 0,05  | 0,944266382 | 0,08  | 0,865206138 | 0,15  | 0,816940286 |
| Olfr1253    | 0,03  | 0,957911944 | 0,04  | 0,947107147 | -0,04 | 0,961297323 | -0,04 | 0,932800758 | 0,07  | 0,928724353 |
| Olfr1255    | -0,09 | 0,865055523 | 0,07  | 0,938944149 | -0,01 | 0,993379272 | 0,09  | 0,817536845 | 0,33  | 0,502819918 |
| Olfr1256    | 0,05  | 0,959392819 | 0,44  | 0,435170839 | 0,16  | 0,842645515 | -0,46 | 0,145489487 | -0,09 | 0,919867638 |
| Olfr1257    | -0,01 | 0,993728727 | 0,04  | 0,9860901   | 0,01  | 0,993686224 | -0,17 | 0,878137097 | -0,17 | 0,870199897 |
| Olfr1259    | 0,09  | 0,840882072 | 0     | 1           | -0,09 | 0,903942509 | -0,15 | 0,732505868 | 0,13  | 0,917777551 |
| Olfr126     | -0,05 | 0,95176371  | -0,19 | 0,73623784  | -0,05 | 0,965007082 | -0,18 | 0,696843539 | 0,19  | 0,825990389 |
| Olfr1261    | -0,24 | 0,709917004 | 0,03  | 0,980888227 | 0,03  | 0,971222784 | -0,3  | 0,562086134 | 0,05  | 0,96963338  |
| Olfr1262    | 0,06  | 0,914180919 | 0,24  | 0,584125383 | -0,38 | 0,436827113 | -0,04 | 0,944558253 | 0,1   | 0,900126162 |
| Olfr1263    | 0,38  | 0,474293292 | -0,1  | 0,883339921 | -0,2  | 0,663029337 | 0,21  | 0,699348716 | 0,08  | 0,920355527 |
| Olfr1264    | 0,17  | 0,714127381 | -0,07 | 0,88928164  | -0,43 | 0,374422909 | 0,01  | 0,98186142  | 0,01  | 0,990091016 |
| Olfr1265    | -0,01 | 0,981308673 | 0,35  | 0,568187167 | -0,21 | 0,723335349 | 0     | 1           | 0,18  | 0,811943401 |
| Olfr1269    | -0,06 | 0,945109498 | -0,06 | 0,957659362 | 0,11  | 0,87783791  | 0,28  | 0,542547247 | 0,09  | 0,934242963 |
| Olfr127     | 0,1   | 0,843240913 | 0,4   | 0,655411428 | -0,27 | 0,624057916 | -0,13 | 0,742001881 | 0,35  | 0,471892288 |
| Olfr1270    | 0,13  | 0,875858546 | -0,04 | 0,948314657 | -0,08 | 0,909233941 | -0,07 | 0,889401797 | 0,33  | 0,631872562 |
| Olfr1271    | -0,36 | 0,509815996 | 0,2   | 0,793603525 | 0,15  | 0,791940256 | -0,05 | 0,899892355 | -0,05 | 0,94920559  |
| Olfr1272    | 0,11  | 0,845909731 | 0,11  | 0,807463629 | -0,31 | 0,495940414 | 0,14  | 0,749488424 | 0,14  | 0,822709063 |
| Olfr1273-ps | -0,04 | 0,947630317 | -0,25 | 0,609345417 | 0,01  | 0,993935103 | 0,13  | 0,729857506 | -0,1  | 0,890957032 |
| Olfr1274-ps | 0,21  | 0,586458491 | -0,02 | 0,989873399 | -0,18 | 0,756257368 | 0,08  | 0,837985327 | -0,04 | 0,964033368 |
| Olfr1275    | -0,04 | 0,961472247 | 0,32  | 0,697111597 | 0,01  | 0,993071391 | -0,02 | 0,981579758 | -0,24 | 0,781006292 |
| Olfr1276    | 0,02  | 0,979827119 | -0,1  | 0,893512326 | -0,09 | 0,913378619 | -0,04 | 0,938689944 | -0,06 | 0,939948423 |
| Olfr1277    | -0,25 | 0,529404238 | -0,11 | 0,792112243 | -0,03 | 0,964708966 | 0,17  | 0,604127556 | 0,22  | 0,68987325  |
| Olfr1278    | 0,14  | 0,742790071 | 0,01  | 0,989177405 | -0,29 | 0,664578139 | -0,12 | 0,7669304   | -0,12 | 0,852559731 |
| Olfr1279    | -0,06 | 0,899079341 | -0,05 | 0,943915456 | 0,09  | 0,888829018 | 0,05  | 0,900213851 | 0,23  | 0,6754671   |
| Olfr128     | -0,1  | 0,939061259 | -0,07 | 0,916822926 | 0,22  | 0,689270883 | -0,24 | 0,687560664 | -0,22 | 0,677256583 |
| Olfr1280    | 0,14  | 0,851275543 | -0,1  | 0,928134372 | -0,13 | 0,835677021 | 0,19  | 0,606082176 | 0,31  | 0,573405587 |
| Olfr1281    | 0,09  | 0,890184407 | 0,01  | 0,992112576 | 0,01  | 0,99394877  | 0,01  | 0,990388217 | -0,01 | 0,98653183  |
| Olfr1282    | 0,16  | 0,792820274 | 0,53  | 0,589698485 | -0,13 | 0,859484164 | -0,28 | 0,602479929 | 0,01  | 0,992370267 |
| Olfr1283    | 0,1   | 0,858869926 | 0,07  | 0,896065393 | -0,16 | 0,736837174 | 0,01  | 0,988205241 | 0,06  | 0,935744017 |
| Olfr1284    | 0,04  | 0,932485025 | 0,07  | 0,869024111 | -0,18 | 0,725314316 | -0,14 | 0,692059018 | 0,31  | 0,565817768 |
| Olfr1286    | 0,22  | 0,741787285 | -0,11 | 0,920677001 | 0,31  | 0,628978443 | 0,4   | 0,468566806 | 0,09  | 0,952190189 |
| Olfr1287    | 0,05  | 0,943079514 | 0     | 1           | -0,04 | 0,956894731 | 0,11  | 0,798505945 | 0,25  | 0,723883531 |
| Olfr1288    | 0,1   | 0,8634587   | -0,04 | 0,943915456 | -0,21 | 0,683917899 | -0,23 | 0,535895689 | -0,13 | 0,872242794 |
| Olfr1289    | -0,07 | 0,907748757 | -0,12 | 0,912535732 | -0,04 | 0,967965018 | 0,14  | 0,814810741 | 0,26  | 0,710368081 |



|              |       |             |       |             |       |             |       |              |       |             |
|--------------|-------|-------------|-------|-------------|-------|-------------|-------|--------------|-------|-------------|
| Olfr129      | -0,12 | 0,812497758 | 0,02  | 0,98459889  | -0,26 | 0,675320774 | -0,14 | 0,735296131  | -0,23 | 0,769180513 |
| Olfr1290     | 0,51  | 0,569883928 | 0,14  | 0,786394409 | -0,23 | 0,752196529 | -0,15 | 0,731281458  | 0,1   | 0,910083563 |
| Olfr1294     | 0,15  | 0,755498004 | -0,07 | 0,898701949 | -0,05 | 0,940276719 | -0,23 | 0,575846032  | -0,32 | 0,545532754 |
| Olfr1295     | 0,19  | 0,678857468 | 0,02  | 0,986440493 | -0,05 | 0,938771378 | 0,01  | 0,991106603  | 0,35  | 0,59705803  |
| Olfr1297     | 0,12  | 0,803761785 | -0,05 | 0,919602924 | 0,11  | 0,839985081 | -0,08 | 0,829596652  | 0,07  | 0,934242963 |
| Olfr1298     | 0,24  | 0,536274184 | 0     | 1           | 0,03  | 0,986800862 | 0,06  | 0,887679669  | 0,05  | 0,954118891 |
| Olfr1299     | 0,36  | 0,622436248 | -0,1  | 0,917863429 | -0,1  | 0,922971065 | 0,05  | 0,927735789  | 0,06  | 0,967522546 |
| Olfr13       | 0,21  | 0,835208982 | -0,14 | 0,866248527 | -0,1  | 0,894749665 | -0,01 | 0,976179334  | -0,38 | 0,419723864 |
| Olfr130      | -0,05 | 0,936611783 | 0,35  | 0,490814009 | 0,23  | 0,736837174 | -0,28 | 0,466936852  | -0,51 | 0,325920244 |
| Olfr1300-ps1 | 0,09  | 0,895031891 | 0,59  | 0,302028989 | -0,01 | 0,993935103 | -0,18 | 0,753660202  | 0,84  | 0,279046828 |
| Olfr1301     | -0,11 | 0,849907632 | 0,11  | 0,829839151 | -0,23 | 0,787011462 | -0,26 | 0,577867246  | 0,08  | 0,91314596  |
| Olfr1302     | 0,05  | 0,932324918 | -0,08 | 0,919016976 | -0,77 | 0,548288344 | -0,02 | 0,9734448386 | -0,14 | 0,835191    |
| Olfr1303     | 0,14  | 0,814888638 | -0,14 | 0,817904541 | -0,09 | 0,887458532 | 0,18  | 0,646998207  | -0,11 | 0,874829878 |
| Olfr1305     | -0,12 | 0,785864159 | 0     | 1           | -0,1  | 0,902637441 | 0,09  | 0,827026984  | -0,01 | 0,990610351 |
| Olfr1306     | 0,17  | 0,749910873 | 0,01  | 0,984414004 | 0,16  | 0,82622365  | -0,02 | 0,963307399  | 0,32  | 0,567170431 |
| Olfr1307     | -0,13 | 0,829299665 | -0,32 | 0,614233457 | 0,12  | 0,880622107 | -0,1  | 0,80805668   | 0     | 0,999595686 |
| Olfr1308     | -0,08 | 0,892823025 | 0,12  | 0,843162191 | -0,04 | 0,961337501 | 0,1   | 0,804780061  | 0,15  | 0,860282167 |
| Olfr1309     | 0,08  | 0,879367259 | 0,05  | 0,925843899 | 0,13  | 0,809231881 | 0     | 1            | -0,25 | 0,635102193 |
| Olfr131      | -0,05 | 0,947630317 | -0,04 | 0,965039248 | -0,05 | 0,953622038 | 0,02  | 0,972584224  | 0     | 0,99981982  |
| Olfr1310     | -0,03 | 0,966775766 | 0,09  | 0,837035571 | -0,4  | 0,565188247 | 0,39  | 0,351707132  | 0,34  | 0,740830591 |
| Olfr1311     | 0,05  | 0,950532575 | 0,03  | 0,98230594  | -0,16 | 0,840824939 | -0,13 | 0,813034756  | -0,29 | 0,717051042 |
| Olfr1312     | 0,15  | 0,755100499 | 0,1   | 0,901965279 | -0,09 | 0,907130828 | -0,05 | 0,933034917  | 0,08  | 0,919058983 |
| Olfr1313     | 0,16  | 0,730833439 | 0,11  | 0,836568137 | -0,3  | 0,628048897 | 0     | 0,997827705  | 0,02  | 0,984632256 |
| Olfr1314     | 0,14  | 0,77234948  | -0,04 | 0,936837377 | -0,08 | 0,914867655 | 0     | 1            | -0,22 | 0,738219533 |
| Olfr1316     | 0,28  | 0,633629128 | -0,03 | 0,985269957 | 0,03  | 0,97548193  | 0,02  | 0,965471779  | -0,1  | 0,894623317 |
| Olfr1317     | -0,1  | 0,874467978 | -0,23 | 0,587454369 | -0,03 | 0,975055092 | 0,1   | 0,811006924  | 0,18  | 0,793952361 |
| Olfr1318     | 0,03  | 0,963473374 | 0,14  | 0,828219939 | -0,06 | 0,926974012 | -0,17 | 0,762847486  | 0,29  | 0,671059641 |
| Olfr132      | 0,12  | 0,799493751 | -0,02 | 0,973945454 | -0,07 | 0,922318683 | -0,2  | 0,699518363  | 0,17  | 0,847312006 |
| Olfr1320     | 0,07  | 0,882060783 | 0,07  | 0,86297915  | -0,04 | 0,955586257 | -0,17 | 0,619678786  | 0,14  | 0,843351909 |
| Olfr1321     | 0,24  | 0,542561813 | -0,07 | 0,926134516 | 0,02  | 0,979791644 | -0,01 | 0,991717124  | 0,01  | 0,991418175 |
| Olfr1322     | -0,06 | 0,905414735 | 0     | 0,998237793 | 0,02  | 0,973006385 | 0,06  | 0,872512015  | 0,06  | 0,949871204 |
| Olfr1323     | 0,01  | 0,979574398 | -0,01 | 0,989873399 | 0,07  | 0,925417014 | 0     | 1            | 0,05  | 0,953297732 |
| Olfr1324     | -0,08 | 0,853351904 | -0,1  | 0,866918678 | -0,13 | 0,852056759 | -0,6  | 0,459812672  | -0,34 | 0,582411164 |
| Olfr1325     | 0,19  | 0,671519872 | -0,01 | 0,997207127 | 0     | 0,997268369 | -0,07 | 0,891773132  | -0,21 | 0,765419939 |
| Olfr1328     | 0,11  | 0,847913893 | 0,09  | 0,842793123 | -0,15 | 0,824306509 | -0,33 | 0,498372058  | -0,14 | 0,888662371 |

|          |       |             |       |             |       |             |       |             |       |             |
|----------|-------|-------------|-------|-------------|-------|-------------|-------|-------------|-------|-------------|
| Olfr1329 | 0,15  | 0,859600103 | 0,1   | 0,847821325 | -0,46 | 0,485752425 | -0,25 | 0,649391541 | -0,47 | 0,487476696 |
| Olfr133  | 0,42  | 0,536802237 | 0,21  | 0,855923109 | 0,37  | 0,550662565 | -0,08 | 0,926028309 | 0,16  | 0,890957032 |
| Olfr1330 | 0,18  | 0,692143311 | 0,39  | 0,594415097 | 0,12  | 0,919055276 | 0,16  | 0,70517561  | 0,27  | 0,678938588 |
| Olfr1335 | -0,01 | 0,991516118 | -0,05 | 0,947684955 | 0,09  | 0,913177179 | 0,15  | 0,733028982 | -0,04 | 0,961749007 |
| Olfr1336 | 0,35  | 0,68194299  | 0,36  | 0,541301427 | -0,35 | 0,380385155 | 0,06  | 0,896599656 | 0,03  | 0,976743304 |
| Olfr1337 | -0,03 | 0,972682121 | -0,08 | 0,916176914 | -0,06 | 0,954229024 | -0,03 | 0,973986088 | -0,07 | 0,949178165 |
| Olfr1338 | -0,2  | 0,649246596 | 0,08  | 0,887005798 | 0,27  | 0,599364835 | 0     | 1           | 0,06  | 0,952435416 |
| Olfr1339 | 0,17  | 0,715493304 | -0,16 | 0,911024505 | -0,12 | 0,881793393 | 0,01  | 0,982744094 | 0,04  | 0,977236465 |
| Olfr134  | -0,23 | 0,687662951 | 0,22  | 0,614530823 | -0,02 | 0,982648972 | 0,02  | 0,972597648 | 0,05  | 0,962760654 |
| Olfr1340 | 0,1   | 0,893283341 | 0     | 1           | 0,1   | 0,864598204 | 0,08  | 0,830503349 | 0,17  | 0,82823489  |
| Olfr1341 | 0,25  | 0,618100277 | -0,05 | 0,945980281 | 0     | 0,997816755 | -0,01 | 0,981394554 | 0,03  | 0,977967676 |
| Olfr1342 | 0,23  | 0,672882915 | 0,06  | 0,925981858 | -0,11 | 0,861307315 | -0,11 | 0,757442222 | -0,01 | 0,992694729 |
| Olfr1344 | -0,41 | 0,522076759 | -0,12 | 0,796997028 | -0,02 | 0,985347628 | 0,11  | 0,796346798 | -0,05 | 0,949544475 |
| Olfr1346 | 0,12  | 0,768257976 | 0,04  | 0,954295809 | -0,02 | 0,984879454 | 0     | 1           | -0,04 | 0,958259949 |
| Olfr1347 | 0,06  | 0,902628825 | 0,11  | 0,882589938 | 0,06  | 0,943472333 | -0,08 | 0,852423181 | -0,01 | 0,993454701 |
| Olfr1348 | 0,09  | 0,882119027 | 0,18  | 0,785244931 | -0,01 | 0,991568687 | -0,19 | 0,618453093 | 0,05  | 0,960041952 |
| Olfr1349 | 0,01  | 0,984759626 | -0,02 | 0,978693133 | -0,12 | 0,83442082  | 0,17  | 0,73670973  | -0,14 | 0,880552266 |
| Olfr135  | 0,27  | 0,660482793 | -0,13 | 0,845809903 | -0,16 | 0,852522547 | 0,28  | 0,44127934  | 0,41  | 0,433531721 |
| Olfr1350 | 0,14  | 0,75717655  | 0,04  | 0,941609372 | -0,13 | 0,825493527 | -0,09 | 0,811871922 | -0,33 | 0,602231893 |
| Olfr1351 | 0,31  | 0,665625405 | -0,24 | 0,832686271 | 0,02  | 0,987208663 | 0,13  | 0,758934576 | -0,26 | 0,790676906 |
| Olfr1352 | 0,08  | 0,90537696  | -0,02 | 0,967833514 | 0,06  | 0,93127773  | 0,12  | 0,767218704 | 0,32  | 0,549450339 |
| Olfr1353 | 0,07  | 0,875046718 | 0     | 1           | -0,06 | 0,930223445 | 0,3   | 0,694650822 | -0,14 | 0,884244347 |
| Olfr1354 | 0,01  | 0,988674093 | 0,07  | 0,898238238 | -0,29 | 0,628427952 | 0,06  | 0,900918368 | 0,03  | 0,974033555 |
| Olfr1355 | 0,21  | 0,728643996 | 0,06  | 0,906234611 | 0,06  | 0,954453764 | -0,05 | 0,90300812  | -0,12 | 0,887287916 |
| Olfr1356 | 0     | 1           | -0,08 | 0,890945229 | -0,15 | 0,785841895 | 0,09  | 0,856184745 | -0,05 | 0,954565959 |
| Olfr1357 | 0,13  | 0,782823969 | 0,06  | 0,910688765 | 0,08  | 0,903948251 | 0,29  | 0,479585038 | 0     | 0,995788254 |
| Olfr1359 | 0,38  | 0,446811495 | 0,05  | 0,912137323 | 0,24  | 0,727262258 | -0,02 | 0,981631718 | -0,04 | 0,960175192 |
| Olfr136  | 0,05  | 0,944969851 | -0,09 | 0,849892994 | 0,08  | 0,906301115 | 0     | 1           | -0,17 | 0,77057227  |
| Olfr1360 | -0,45 | 0,559760851 | -0,23 | 0,703041962 | 0,04  | 0,975771514 | -0,19 | 0,610149813 | -0,28 | 0,601002241 |
| Olfr1361 | 0,03  | 0,972164346 | 0     | 0,997600248 | 0,04  | 0,955257293 | -0,01 | 0,98922569  | -0,16 | 0,812229801 |
| Olfr1362 | -0,17 | 0,751534367 | -0,27 | 0,51825831  | 0,14  | 0,84847388  | 0,15  | 0,699435233 | -0,19 | 0,77360786  |
| Olfr1364 | 0,06  | 0,90742841  | -0,06 | 0,900801202 | -0,26 | 0,628978443 | 0     | 1           | 0,22  | 0,731527639 |
| Olfr1366 | 0,25  | 0,531163951 | 0,09  | 0,883145635 | -0,07 | 0,925245169 | 0,07  | 0,904623687 | -0,03 | 0,979456872 |
| Olfr1367 | 0,19  | 0,758514941 | 0,19  | 0,672620723 | -0,02 | 0,979744938 | -0,03 | 0,943143586 | 0,33  | 0,471919432 |
| Olfr1368 | 0,05  | 0,950669622 | 0,13  | 0,825192868 | -0,03 | 0,975055092 | 0     | 1           | 0,04  | 0,958259949 |

|              |       |             |       |             |       |             |       |             |       |             |
|--------------|-------|-------------|-------|-------------|-------|-------------|-------|-------------|-------|-------------|
| Olfr137      | 0,4   | 0,601805694 | 0,01  | 0,989843833 | -0,56 | 0,486238146 | -0,01 | 0,996714438 | -0,03 | 0,975441362 |
| Olfr1370     | 0,05  | 0,958188047 | -0,11 | 0,884001567 | -0,06 | 0,946267064 | 0,17  | 0,65865291  | 0,1   | 0,884640084 |
| Olfr1371     | -0,02 | 0,970078059 | -0,04 | 0,954948291 | -0,71 | 0,177745963 | -0,24 | 0,747854799 | -0,09 | 0,939448119 |
| Olfr1372-ps1 | 0,89  | 0,562609036 | 1,21  | 0,49125334  | -1,84 | 0,007179133 | -3,4  | 0,041065603 | 0,53  | 0,715604617 |
| Olfr1373     | 0,33  | 0,511497074 | -0,08 | 0,882589938 | -0,45 | 0,552327273 | -0,04 | 0,95852873  | 0,07  | 0,935100205 |
| Olfr1377     | 0,07  | 0,959985598 | 0,3   | 0,633673324 | 0,19  | 0,8290371   | -0,23 | 0,771584076 | -0,05 | 0,977903513 |
| Olfr1378     | 0,11  | 0,823444885 | 0,09  | 0,841184864 | 0     | 0,997220401 | -0,1  | 0,790657712 | 0,15  | 0,82794257  |
| Olfr138      | 0,03  | 0,981412917 | 0,2   | 0,770442753 | -0,19 | 0,79653228  | -0,13 | 0,87148686  | 0,06  | 0,959573673 |
| Olfr1380     | 0,25  | 0,604403643 | 0,04  | 0,943915456 | -0,38 | 0,531023255 | -0,04 | 0,946162356 | -0,09 | 0,937446198 |
| Olfr1383     | 0,33  | 0,757499328 | 0,19  | 0,723989536 | -1,5  | 0,409364034 | -0,04 | 0,946675367 | 0,16  | 0,801960538 |
| Olfr1384     | -0,28 | 0,574307926 | -0,01 | 0,989873399 | -0,49 | 0,500849254 | -0,31 | 0,314856134 | -0,3  | 0,590939888 |
| Olfr1385     | -0,03 | 0,964869618 | 0,22  | 0,687328663 | -0,07 | 0,910160525 | 0,05  | 0,9485706   | -0,26 | 0,793839436 |
| Olfr1386     | 0,02  | 0,969746898 | 0,11  | 0,808498635 | -0,09 | 0,927950027 | -0,04 | 0,932315462 | 0,17  | 0,80222716  |
| Olfr1387     | 0,16  | 0,736503749 | 0     | 0,997700959 | -0,55 | 0,29239254  | -0,43 | 0,331328372 | -0,31 | 0,674843991 |
| Olfr1388     | 0,09  | 0,871885362 | -0,13 | 0,840019849 | 0,08  | 0,921956183 | 0     | 1           | -0,1  | 0,884248437 |
| Olfr1389     | 0,01  | 0,992615147 | -0,26 | 0,733888259 | -0,6  | 0,245581777 | -0,12 | 0,8336235   | 0,05  | 0,978306122 |
| Olfr139      | 0,12  | 0,895278749 | 0     | 1           | -0,06 | 0,95204022  | -0,05 | 0,899335603 | -0,2  | 0,697757911 |
| Olfr1390     | 0,06  | 0,904633081 | -0,05 | 0,9152526   | -0,05 | 0,94940954  | -0,06 | 0,891773132 | -0,14 | 0,825966687 |
| Olfr1391     | 0,53  | 0,518267881 | -0,1  | 0,816543137 | -0,11 | 0,861307315 | 0,17  | 0,651935956 | 0,07  | 0,927296036 |
| Olfr1392     | -0,06 | 0,936700983 | 0,48  | 0,633883634 | -0,5  | 0,530404705 | -1,51 | 0,572635263 | -1,24 | 0,664160042 |
| Olfr1393     | 0,24  | 0,540296693 | 0,25  | 0,695265534 | 0,03  | 0,973732268 | -0,07 | 0,863346533 | -0,12 | 0,8736151   |
| Olfr1394     | 0,1   | 0,840654169 | -0,11 | 0,809683705 | -0,25 | 0,683331533 | 0,33  | 0,467700021 | 0,41  | 0,434997258 |
| Olfr1395     | 0,07  | 0,943079514 | -0,09 | 0,872672595 | -0,25 | 0,591404136 | -0,04 | 0,926704232 | 0,15  | 0,845218636 |
| Olfr1396     | -0,32 | 0,793709395 | -0,02 | 0,971464245 | -0,09 | 0,877598693 | -5,2  | 0,001139257 | -2,87 | 0,003700866 |
| Olfr140      | 0,21  | 0,714793039 | 0,01  | 0,996105203 | -0,23 | 0,664883291 | 0,08  | 0,82237355  | -0,04 | 0,969994712 |
| Olfr1402     | -0,06 | 0,935414842 | 0,05  | 0,926157704 | -0,09 | 0,923202999 | 0     | 1           | 0,06  | 0,939930189 |
| Olfr1404     | 0,64  | 0,241021853 | -0,45 | 0,405820844 | -0,42 | 0,418405756 | 0,38  | 0,519885741 | 0,11  | 0,910829332 |
| Olfr1406     | -0,03 | 0,964378908 | -0,05 | 0,917256002 | -0,05 | 0,953456022 | -0,23 | 0,688800416 | -0,15 | 0,861056054 |
| Olfr1408     | 0,1   | 0,854129332 | -0,13 | 0,771042534 | -0,09 | 0,877023506 | -0,02 | 0,968211182 | 0,12  | 0,860591136 |
| Olfr141      | -0,02 | 0,974895562 | 0,07  | 0,965039248 | -0,18 | 0,772008734 | -0,22 | 0,747003908 | -0,06 | 0,953297732 |
| Olfr1410     | 0,22  | 0,61660035  | -0,04 | 0,956934125 | 0,03  | 0,977126842 | 0,16  | 0,709465672 | -0,03 | 0,977599806 |
| Olfr1411     | -0,11 | 0,860985365 | 0,1   | 0,929289366 | -0,07 | 0,926974012 | 0,2   | 0,601337033 | 0,17  | 0,802802845 |
| Olfr1412     | 0,05  | 0,928103232 | -0,23 | 0,697686555 | -0,03 | 0,967767582 | 0,25  | 0,565335362 | -0,15 | 0,825518917 |
| Olfr1413     | 0,69  | 0,318341154 | 0,03  | 0,974890527 | -0,3  | 0,649937048 | -0,11 | 0,8914104   | -0,26 | 0,716229308 |
| Olfr1414     | 0,38  | 0,415979951 | -0,2  | 0,808222386 | -0,2  | 0,816934675 | 0,54  | 0,331911754 | 0,25  | 0,77006342  |

|          |       |             |       |             |       |             |       |             |       |             |
|----------|-------|-------------|-------|-------------|-------|-------------|-------|-------------|-------|-------------|
| Olfr1415 | 0,43  | 0,43904576  | 0,01  | 0,989873399 | -0,16 | 0,868810529 | 0,11  | 0,810172317 | 0,12  | 0,920710557 |
| Olfr1416 | 0,15  | 0,712165686 | -0,08 | 0,873628464 | 0,09  | 0,897932497 | -0,13 | 0,762847486 | 0,08  | 0,920355527 |
| Olfr1417 | -0,02 | 0,975949545 | -0,23 | 0,752529534 | -0,22 | 0,800839032 | -0,01 | 0,993646757 | 0,28  | 0,698795718 |
| Olfr1418 | -0,09 | 0,874467978 | 0,26  | 0,609361686 | -0,19 | 0,770526999 | -0,24 | 0,500451809 | -0,15 | 0,823098095 |
| Olfr1419 | 0,31  | 0,679451519 | -0,1  | 0,819516105 | -0,3  | 0,541296354 | -0,31 | 0,66732182  | 0,02  | 0,983514531 |
| Olfr142  | 0,36  | 0,472256147 | 0,12  | 0,819802664 | -0,44 | 0,483761569 | 0,25  | 0,413087419 | 0,28  | 0,68987325  |
| Olfr1420 | 0,02  | 0,984747015 | 0,12  | 0,805949528 | 0,08  | 0,904239687 | -0,07 | 0,873812847 | 0,05  | 0,952686875 |
| Olfr1423 | -0,01 | 0,993728727 | 0,04  | 0,948496432 | -0,04 | 0,959437564 | 0,01  | 0,991811201 | 0,31  | 0,589271906 |
| Olfr1424 | 0,17  | 0,714662474 | 0,12  | 0,80678645  | -0,17 | 0,773365699 | 0,1   | 0,869074595 | -0,18 | 0,819072786 |
| Olfr1425 | 0,18  | 0,702783604 | -0,05 | 0,970020205 | 0,11  | 0,865145801 | 0,11  | 0,899003207 | 0,2   | 0,719609866 |
| Olfr1426 | 0,05  | 0,957427783 | 0,21  | 0,700297886 | 0,04  | 0,967930981 | 0,16  | 0,795196848 | 0,08  | 0,948163009 |
| Olfr1427 | -0,06 | 0,910211895 | -0,17 | 0,726679287 | 0,01  | 0,992201196 | -0,02 | 0,960747562 | -0,13 | 0,893737959 |
| Olfr1428 | -0,08 | 0,892062603 | 0,15  | 0,857386929 | -0,21 | 0,716352322 | -0,01 | 0,988205241 | -0,12 | 0,851211882 |
| Olfr143  | 0,3   | 0,408313743 | -0,12 | 0,845833295 | -0,03 | 0,97833575  | -0,2  | 0,615065042 | -0,3  | 0,838634367 |
| Olfr1431 | 0,14  | 0,712165686 | 0,03  | 0,958856577 | -0,07 | 0,92936515  | 0     | 1           | 0,11  | 0,92289003  |
| Olfr1434 | 0,03  | 0,962660554 | 0     | 1           | -0,02 | 0,979788785 | -0,03 | 0,942235848 | 0     | 0,997856047 |
| Olfr1436 | 0,06  | 0,903817676 | 0,2   | 0,763796207 | 0     | 0,997220401 | 0     | 0,999809258 | 0,06  | 0,955784619 |
| Olfr1437 | -0,05 | 0,928103232 | 0,5   | 0,295775341 | -0,35 | 0,455889638 | -0,5  | 0,129101197 | -0,13 | 0,827032122 |
| Olfr1440 | 0,15  | 0,761457464 | 0,17  | 0,762968641 | -0,12 | 0,837098462 | -0,13 | 0,696843539 | -0,02 | 0,981677577 |
| Olfr1441 | 0,07  | 0,926692467 | 0,14  | 0,89034555  | -0,52 | 0,394881469 | 0,24  | 0,749554449 | 0,13  | 0,837777125 |
| Olfr1442 | 0,06  | 0,914512926 | 0,36  | 0,697563611 | -0,35 | 0,549209716 | -0,23 | 0,687560664 | 0,12  | 0,877669996 |
| Olfr1443 | -0,2  | 0,653544321 | 0,06  | 0,934059202 | 0,17  | 0,834017354 | 0,2   | 0,665334658 | 0,32  | 0,653769438 |
| Olfr1444 | 0,42  | 0,239601221 | -0,14 | 0,747928263 | -0,12 | 0,894239558 | 0,15  | 0,777827729 | -0,1  | 0,914498972 |
| Olfr1445 | 0,08  | 0,922118639 | -0,19 | 0,792112243 | -0,03 | 0,973789361 | 0,16  | 0,758519001 | 0,04  | 0,961812269 |
| Olfr1446 | 0,14  | 0,892974912 | -0,05 | 0,975124205 | -0,18 | 0,78984366  | -0,12 | 0,806497386 | -0,2  | 0,802065913 |
| Olfr1447 | 0,11  | 0,786363142 | 0,02  | 0,977697653 | 0,12  | 0,820243663 | 0,01  | 0,988087974 | -0,09 | 0,913274952 |
| Olfr1448 | -0,03 | 0,953968421 | 0,09  | 0,831580851 | -0,39 | 0,425068055 | -0,26 | 0,484129767 | -0,18 | 0,747614877 |
| Olfr1449 | 0,16  | 0,761259992 | -0,04 | 0,940507154 | 0,15  | 0,81092438  | 0,18  | 0,797601539 | -0,1  | 0,89288875  |
| Olfr145  | 0,44  | 0,498030624 | 0,47  | 0,494445434 | -0,33 | 0,64759465  | -0,07 | 0,843982538 | -0,07 | 0,926484239 |
| Olfr1450 | 0,15  | 0,733054982 | -0,22 | 0,66692082  | -0,1  | 0,891482131 | 0,11  | 0,905614221 | 0,29  | 0,670576074 |
| Olfr1451 | 0,35  | 0,421029929 | -0,18 | 0,838450577 | -0,17 | 0,827656829 | 0,2   | 0,564749161 | -0,27 | 0,729208209 |
| Olfr1453 | 0,18  | 0,683707839 | 0,16  | 0,738762579 | -0,02 | 0,982373116 | 0,02  | 0,965664624 | -0,03 | 0,969117862 |
| Olfr1454 | 0,55  | 0,359025965 | 0,13  | 0,909329669 | 0,33  | 0,546286708 | 0,13  | 0,889515057 | 0,85  | 0,388768081 |
| Olfr1457 | 0,11  | 0,833911532 | -0,04 | 0,957957101 | 0,18  | 0,722633025 | -0,07 | 0,901851677 | -0,17 | 0,789019303 |
| Olfr1459 | 0     | 0,997916479 | -0,1  | 0,904698551 | -0,26 | 0,571405665 | -0,11 | 0,763593883 | -0,16 | 0,817914157 |

|          |       |             |       |             |       |             |       |             |       |             |
|----------|-------|-------------|-------|-------------|-------|-------------|-------|-------------|-------|-------------|
| Olfr146  | 0,12  | 0,832696131 | -0,33 | 0,549925402 | 0,02  | 0,979791644 | 0,44  | 0,182543552 | 0,23  | 0,708696699 |
| Olfr1461 | 0,12  | 0,859479833 | 0     | 0,999677133 | 0,13  | 0,828207503 | 0     | 0,993337409 | -0,01 | 0,991437885 |
| Olfr1462 | 0,36  | 0,480468471 | -0,09 | 0,87042878  | -0,5  | 0,330054927 | -0,01 | 0,986507179 | 0,04  | 0,96506592  |
| Olfr1463 | 0,23  | 0,61200942  | -0,02 | 0,969019461 | -0,05 | 0,94930407  | -0,04 | 0,922224155 | 0,19  | 0,779554369 |
| Olfr1465 | 0,21  | 0,596550801 | 0,06  | 0,925981858 | -0,08 | 0,917355383 | 0,23  | 0,475255589 | -0,07 | 0,933307994 |
| Olfr1466 | -0,02 | 0,965703244 | -0,29 | 0,641804702 | -0,21 | 0,732540375 | -0,02 | 0,970163463 | -0,4  | 0,437452606 |
| Olfr1467 | 0,08  | 0,907748757 | -0,09 | 0,836068828 | 0,09  | 0,898305096 | 0,22  | 0,513863948 | 0,31  | 0,649339908 |
| Olfr1469 | -0,14 | 0,856887426 | -0,03 | 0,973945454 | 0,07  | 0,923350407 | -0,02 | 0,967866794 | 0,01  | 0,985982505 |
| Olfr147  | 0,06  | 0,909477787 | 0,05  | 0,932292974 | -0,13 | 0,82162081  | -0,06 | 0,891773132 | 0,27  | 0,59585005  |
| Olfr1471 | -0,16 | 0,772079485 | -0,13 | 0,857388191 | 0,02  | 0,989772079 | -0,03 | 0,945987058 | -0,16 | 0,853254359 |
| Olfr1472 | 0,01  | 0,990352291 | -0,03 | 0,967833514 | -0,22 | 0,610632059 | -0,04 | 0,951235707 | 0,39  | 0,561876467 |
| Olfr1474 | 0,41  | 0,393761385 | 0,12  | 0,884434898 | -0,27 | 0,64074882  | -0,07 | 0,927265002 | -0,1  | 0,918797466 |
| Olfr1475 | -0,05 | 0,91366065  | 0,16  | 0,857732355 | -0,12 | 0,891365932 | -0,18 | 0,812468015 | -0,21 | 0,806799849 |
| Olfr1477 | 0,05  | 0,937935576 | -0,21 | 0,762512516 | -0,15 | 0,823823322 | 0,07  | 0,921063977 | 0,06  | 0,952296554 |
| Olfr148  | 0,1   | 0,808298405 | 0,04  | 0,9381453   | -0,31 | 0,473499244 | 0     | 0,998710655 | 0,09  | 0,910212022 |
| Olfr1480 | 0,09  | 0,91366065  | -0,06 | 0,890945229 | -0,33 | 0,49582632  | -0,01 | 0,988205241 | 0,11  | 0,864415219 |
| Olfr1484 | 0,91  | 0,053789028 | -0,11 | 0,853569707 | -0,45 | 0,372394495 | 0,14  | 0,764489444 | 0,22  | 0,854135221 |
| Olfr1487 | 0,63  | 0,282931219 | 0,02  | 0,980518468 | 0,13  | 0,922318683 | 0,73  | 0,214242928 | 1     | 0,155943615 |
| Olfr1489 | -0,09 | 0,832696131 | 0,07  | 0,880892852 | -0,12 | 0,868609956 | -0,09 | 0,853256891 | -0,13 | 0,844079844 |
| Olfr149  | -0,04 | 0,950930226 | -0,03 | 0,958856577 | -0,16 | 0,787474846 | -0,05 | 0,898801714 | -0,07 | 0,923951087 |
| Olfr1490 | 0,15  | 0,749904144 | -0,08 | 0,912535732 | 0     | 0,999307823 | 0,01  | 0,977595722 | -0,04 | 0,962872595 |
| Olfr1491 | -0,09 | 0,889788892 | -0,09 | 0,882847123 | 0,19  | 0,859460126 | -0,23 | 0,747830911 | -0,39 | 0,633315948 |
| Olfr1494 | -0,16 | 0,740529913 | 0,01  | 0,982420791 | -0,2  | 0,821089748 | 0     | 0,997816344 | 0,29  | 0,745574572 |
| Olfr1495 | 0,27  | 0,66331039  | 0,26  | 0,829203986 | 0,11  | 0,879790145 | -0,11 | 0,777533468 | 0,11  | 0,865258929 |
| Olfr1496 | -0,12 | 0,806491264 | 0,12  | 0,819802664 | -0,06 | 0,929425752 | 0,1   | 0,806145597 | 0,14  | 0,84147389  |
| Olfr1497 | 0,11  | 0,882027826 | 0,25  | 0,700831651 | -0,11 | 0,902672106 | 0,01  | 0,991962381 | 0,47  | 0,35982462  |
| Olfr1499 | 0,17  | 0,794551358 | -0,06 | 0,901321339 | -0,34 | 0,474378892 | 0,4   | 0,476474002 | 0,2   | 0,774032893 |
| Olfr15   | 0,11  | 0,812230622 | 0     | 0,997700959 | -0,23 | 0,726725386 | -0,21 | 0,58168661  | -0,22 | 0,720844381 |
| Olfr150  | -0,01 | 0,993175772 | -0,08 | 0,878725004 | -0,06 | 0,95204022  | -0,18 | 0,702311689 | -0,21 | 0,86361563  |
| Olfr1500 | 0,16  | 0,882500171 | 0,04  | 0,958856577 | -0,07 | 0,932577939 | 0,19  | 0,684759625 | 0,18  | 0,824818547 |
| Olfr1501 | -0,04 | 0,95176371  | 0,36  | 0,615311543 | -0,16 | 0,753280744 | -0,01 | 0,985865561 | -0,24 | 0,71770856  |
| Olfr1502 | 0,06  | 0,962810563 | -0,16 | 0,748874675 | -0,24 | 0,751758339 | 0,43  | 0,450222377 | -0,1  | 0,913934839 |
| Olfr1504 | 0,05  | 0,94061448  | 0,1   | 0,85154774  | -0,24 | 0,695705149 | 0,01  | 0,988718521 | 0,02  | 0,983494749 |
| Olfr1505 | 0,06  | 0,921924723 | -0,17 | 0,703291096 | -0,07 | 0,931465801 | 0,05  | 0,957573971 | 0,03  | 0,981452448 |
| Olfr1507 | 0,06  | 0,959218841 | 0,03  | 0,950868962 | -0,34 | 0,693217111 | -0,09 | 0,885417869 | 0,06  | 0,947559952 |

|              |       |             |       |             |       |             |       |             |       |             |
|--------------|-------|-------------|-------|-------------|-------|-------------|-------|-------------|-------|-------------|
| Olfr1508     | -0,25 | 0,779331628 | -0,17 | 0,880496026 | 0,04  | 0,973732268 | 0,36  | 0,545758277 | -0,18 | 0,836061657 |
| Olfr1509     | 0,19  | 0,625701656 | 0,08  | 0,849511429 | -0,11 | 0,854568273 | 0,12  | 0,790298453 | -0,15 | 0,822081068 |
| Olfr151      | -0,39 | 0,593346967 | -0,12 | 0,84786877  | 0,16  | 0,845062212 | 0,5   | 0,241597107 | 0,05  | 0,958856121 |
| Olfr1510     | -0,07 | 0,899006094 | -0,08 | 0,919762719 | -0,02 | 0,987356432 | 0,27  | 0,487885164 | -0,02 | 0,983410517 |
| Olfr1512     | 0,16  | 0,777833654 | -0,13 | 0,87189957  | -0,22 | 0,684883663 | 0,03  | 0,958172386 | -0,09 | 0,925858284 |
| Olfr1513     | 0,15  | 0,753900874 | 0,01  | 0,986013411 | -0,07 | 0,906360615 | -0,1  | 0,813711032 | -0,06 | 0,946463658 |
| Olfr152      | 0,08  | 0,898746854 | 0,39  | 0,544440118 | 0     | 0,997220401 | -0,01 | 0,981203009 | -0,03 | 0,980961333 |
| Olfr153      | 0,21  | 0,792297169 | -0,1  | 0,835533307 | -0,2  | 0,757498725 | 0,06  | 0,911705784 | -0,13 | 0,869113953 |
| Olfr1532-ps1 | 0,05  | 0,937076069 | 0     | 0,998766432 | 0,05  | 0,936708644 | -0,03 | 0,942739047 | -0,01 | 0,992607235 |
| Olfr1535     | -0,01 | 0,995438679 | -0,01 | 0,996113371 | -0,28 | 0,61483831  | 0     | 1           | 0,13  | 0,861977667 |
| Olfr1537     | 0,21  | 0,769152945 | 0,03  | 0,956555856 | -0,04 | 0,97548193  | 0,19  | 0,669653978 | -0,05 | 0,962408022 |
| Olfr154      | 0,14  | 0,764824121 | 0,42  | 0,574343122 | -0,24 | 0,689058581 | -0,18 | 0,700431952 | 0,1   | 0,900126162 |
| Olfr155      | 0     | 0,997933333 | -0,01 | 0,994161588 | -0,1  | 0,898935616 | 0,17  | 0,730531335 | 0,25  | 0,753328965 |
| Olfr156      | 0,15  | 0,800209334 | -0,21 | 0,764289173 | -0,1  | 0,88783743  | -0,06 | 0,921600281 | -0,21 | 0,732955029 |
| Olfr157      | -0,53 | 0,375878015 | -0,13 | 0,824372931 | 0,03  | 0,95976212  | 0,05  | 0,961123444 | -0,09 | 0,93992804  |
| Olfr159      | 0,16  | 0,697356307 | -0,02 | 0,977683451 | -0,11 | 0,873583602 | 0,06  | 0,878760462 | -0,02 | 0,977967676 |
| Olfr16       | 0,1   | 0,832798869 | -0,04 | 0,941705846 | 0,08  | 0,901748432 | -0,01 | 0,975655831 | -0,04 | 0,958259949 |
| Olfr161      | -0,05 | 0,932324918 | -0,03 | 0,969296652 | 0,17  | 0,739945591 | -0,06 | 0,908141892 | -0,21 | 0,7580213   |
| Olfr164      | 0,03  | 0,972720447 | 0,12  | 0,898952381 | 0,03  | 0,964509282 | -0,46 | 0,186877063 | -0,4  | 0,432621109 |
| Olfr165      | 0,22  | 0,598267249 | -0,09 | 0,829839151 | 0,02  | 0,981674142 | 0,16  | 0,70344102  | 0,21  | 0,73108884  |
| Olfr166      | -0,03 | 0,971590029 | -0,19 | 0,700951495 | -0,95 | 0,375756922 | 0,18  | 0,718237629 | 0,09  | 0,935100205 |
| Olfr167      | 0,06  | 0,907748757 | 0,01  | 0,996865461 | 0,12  | 0,885705243 | -0,02 | 0,967247581 | 0,21  | 0,75695866  |
| Olfr168      | -0,21 | 0,721922161 | 0,03  | 0,967742712 | 0,38  | 0,527929204 | -0,19 | 0,627089222 | 0,05  | 0,953744167 |
| Olfr169      | -0,37 | 0,490443323 | 0,39  | 0,671319666 | 0,04  | 0,950725218 | -0,11 | 0,770622324 | -0,04 | 0,96176496  |
| Olfr17       | 0,13  | 0,841541699 | 0,09  | 0,882847123 | -0,24 | 0,678840444 | -0,06 | 0,887240837 | -0,08 | 0,94250983  |
| Olfr170      | 0,54  | 0,243426651 | 0,1   | 0,941258271 | -0,54 | 0,302861841 | -0,14 | 0,818711104 | 0,43  | 0,358607257 |
| Olfr172      | 0,04  | 0,960720096 | -0,02 | 0,971273998 | 0,32  | 0,696939569 | 0     | 0,999221046 | -0,03 | 0,979152939 |
| Olfr173      | -0,07 | 0,882246744 | 0,02  | 0,982137548 | -0,18 | 0,79284622  | 0,17  | 0,668471362 | 0,03  | 0,980904768 |
| Olfr175-ps1  | 0     | 0,997842309 | -0,06 | 0,910193022 | 0,1   | 0,877305617 | 0,03  | 0,958172386 | -0,15 | 0,799383678 |
| Olfr178      | 0,06  | 0,905410816 | -0,01 | 0,989873399 | -0,07 | 0,9127937   | 0,02  | 0,966196518 | -0,12 | 0,869765418 |
| Olfr18       | -0,08 | 0,909036289 | 0,22  | 0,77136968  | -0,12 | 0,938323709 | -0,07 | 0,853470813 | 0,09  | 0,905581898 |
| Olfr180      | 0,03  | 0,985842627 | -0,47 | 0,457889449 | 0     | 0,999931921 | 0,73  | 0,078332465 | 0,56  | 0,506316926 |
| Olfr181      | 0,06  | 0,897013506 | 0,18  | 0,781665479 | -0,1  | 0,922847352 | -0,16 | 0,720900596 | 0,01  | 0,992607235 |
| Olfr183      | 0,37  | 0,362012674 | 0,18  | 0,746439988 | -0,18 | 0,773365699 | -0,22 | 0,638988093 | -0,1  | 0,881968395 |
| Olfr186      | 0,01  | 0,984759626 | -0,03 | 0,958476776 | -0,34 | 0,469558664 | 0,03  | 0,945987058 | 0,17  | 0,827150612 |

|         |       |             |       |             |       |             |       |             |       |             |
|---------|-------|-------------|-------|-------------|-------|-------------|-------|-------------|-------|-------------|
| Olfr187 | 0,22  | 0,779331628 | 0,26  | 0,738984063 | -0,45 | 0,37686469  | -0,25 | 0,692735545 | -0,7  | 0,387633714 |
| Olfr19  | 0,01  | 0,993175772 | 0,02  | 0,974580396 | -0,02 | 0,984879454 | 0,06  | 0,902636185 | 0,28  | 0,608004947 |
| Olfr190 | -0,17 | 0,68194299  | 0,09  | 0,863268685 | 0,01  | 0,992972594 | 0,02  | 0,970373003 | 0,16  | 0,795563666 |
| Olfr191 | 0,07  | 0,901768047 | 0,41  | 0,605851161 | 0     | 0,997777556 | -0,1  | 0,805378375 | 0,24  | 0,790676906 |
| Olfr192 | -0,06 | 0,922118639 | 0,02  | 0,981758111 | -0,09 | 0,881924837 | 0,03  | 0,957427513 | -0,05 | 0,95587699  |
| Olfr193 | 0,2   | 0,840218728 | -0,39 | 0,615288453 | -0,13 | 0,825125026 | 0,29  | 0,608766335 | 0,32  | 0,569349136 |
| Olfr194 | 0,17  | 0,76205049  | -0,03 | 0,959685428 | -0,06 | 0,946845275 | 0,03  | 0,959399629 | 0,05  | 0,952718905 |
| Olfr195 | 0,03  | 0,956367515 | 0,14  | 0,80678645  | -0,06 | 0,921956183 | 0,07  | 0,878366514 | 0,08  | 0,93035024  |
| Olfr196 | 0,02  | 0,964154899 | 0,42  | 0,51825831  | 0,2   | 0,654202637 | -0,36 | 0,418410394 | -0,09 | 0,909535232 |
| Olfr197 | -0,09 | 0,882060783 | 0,02  | 0,971118451 | -0,22 | 0,722652892 | 0     | 0,997932303 | -0,1  | 0,884640084 |
| Olfr198 | -0,29 | 0,554473314 | -0,11 | 0,868538818 | -0,01 | 0,987003605 | 0,15  | 0,9072558   | -0,35 | 0,637280543 |
| Olfr199 | -0,02 | 0,976855185 | -0,03 | 0,959826044 | -0,08 | 0,891073338 | 0,07  | 0,880201855 | -0,03 | 0,979341305 |
| Olfr2   | -0,21 | 0,719691888 | 0,11  | 0,828498885 | 0     | 0,999931921 | 0,28  | 0,564693464 | 0,16  | 0,827032122 |
| Olfr20  | 0     | 0,998307191 | 0,05  | 0,914464304 | -0,15 | 0,80420736  | -0,28 | 0,424966102 | -0,1  | 0,911850421 |
| Olfr201 | -0,39 | 0,578185633 | -0,04 | 0,956504634 | -0,32 | 0,503819492 | 0,01  | 0,992323442 | 0,01  | 0,9939542   |
| Olfr202 | -0,16 | 0,727137147 | 0,06  | 0,911024505 | 0,02  | 0,982648972 | -0,02 | 0,959921588 | 0,27  | 0,594763089 |
| Olfr203 | 0,05  | 0,923022551 | -0,01 | 0,997417399 | -0,2  | 0,731438246 | -0,09 | 0,920640884 | 0,1   | 0,943668392 |
| Olfr204 | 0,17  | 0,714127381 | -0,02 | 0,975427696 | -0,13 | 0,817106175 | -0,04 | 0,941611747 | 0,2   | 0,824818547 |
| Olfr205 | 0,3   | 0,613990129 | 0,05  | 0,938638797 | -0,61 | 0,420728336 | -0,38 | 0,401230688 | -0,36 | 0,619455895 |
| Olfr206 | 0,22  | 0,567937252 | -0,21 | 0,724649414 | -0,19 | 0,765864081 | 0,05  | 0,894007511 | 0,03  | 0,96439553  |
| Olfr211 | 0,2   | 0,66331039  | 0,19  | 0,722369153 | -0,31 | 0,614237718 | 0,02  | 0,975492206 | 0,09  | 0,920355527 |
| Olfr212 | 0,3   | 0,634129153 | 0,3   | 0,603359081 | -0,36 | 0,460945976 | -0,47 | 0,287155061 | -0,13 | 0,879072575 |
| Olfr213 | 0,61  | 0,241021853 | 0,16  | 0,829626088 | 0,16  | 0,783326867 | 0,05  | 0,943143586 | 0,32  | 0,59585005  |
| Olfr214 | 0,03  | 0,959714813 | -0,1  | 0,856132795 | 0,07  | 0,929379889 | -0,06 | 0,897469459 | -0,02 | 0,982422915 |
| Olfr215 | 0,16  | 0,786668605 | 0,24  | 0,7122758   | -0,1  | 0,898000984 | -0,12 | 0,752599588 | -0,21 | 0,816189174 |
| Olfr218 | 0,02  | 0,975179875 | 0,23  | 0,695689103 | -0,05 | 0,955303601 | 0,06  | 0,880407475 | 0,11  | 0,89246526  |
| Olfr220 | -0,02 | 0,978501161 | -0,12 | 0,820806352 | 0,08  | 0,902672106 | 0,14  | 0,714019269 | 0,05  | 0,952718905 |
| Olfr221 | 0,29  | 0,576230315 | 0,17  | 0,861862086 | -0,39 | 0,561271294 | -0,08 | 0,85301747  | 0,09  | 0,91339829  |
| Olfr222 | -0,08 | 0,90742841  | 0,2   | 0,859585789 | -0,17 | 0,853888307 | 0,08  | 0,88017942  | 0,21  | 0,777437869 |
| Olfr223 | 0,05  | 0,942119638 | -0,1  | 0,822567336 | 0,03  | 0,970673334 | -0,01 | 0,984714881 | -0,06 | 0,950267521 |
| Olfr224 | 0,02  | 0,984124693 | 0,18  | 0,722938629 | 0,1   | 0,871283127 | -0,12 | 0,78481967  | -0,04 | 0,975441362 |
| Olfr225 | 0,2   | 0,613346685 | 0,12  | 0,794404033 | -0,1  | 0,856046789 | -0,03 | 0,959777804 | 0,18  | 0,799199452 |
| Olfr228 | -0,03 | 0,962810563 | 0,1   | 0,843934667 | 0,05  | 0,947881687 | -0,15 | 0,671932624 | -0,16 | 0,834671019 |
| Olfr229 | -0,01 | 0,995482647 | 0,15  | 0,690169085 | -0,12 | 0,887943941 | -0,27 | 0,721848758 | -0,22 | 0,796161453 |
| Olfr23  | -0,17 | 0,657124524 | -0,12 | 0,781665479 | -0,09 | 0,894239558 | 0,01  | 0,991962381 | 0,15  | 0,835191    |

|             |       |             |       |             |       |             |       |             |       |             |
|-------------|-------|-------------|-------|-------------|-------|-------------|-------|-------------|-------|-------------|
| Olfr231     | 0,14  | 0,808882471 | -0,03 | 0,970020205 | -0,06 | 0,924680094 | 0,25  | 0,676010477 | 0,04  | 0,969117862 |
| Olfr235     | -0,05 | 0,961223504 | -0,07 | 0,89034555  | 0,02  | 0,986406216 | -0,07 | 0,89304747  | -0,13 | 0,88131673  |
| Olfr237-ps1 | -0,01 | 0,993728727 | 0,25  | 0,652758123 | 0,17  | 0,859411859 | 0,05  | 0,924164344 | 0,04  | 0,970154126 |
| Olfr24      | 0,04  | 0,948219968 | 0,18  | 0,702991386 | 0,03  | 0,976712056 | -0,17 | 0,69151142  | 0,43  | 0,386227652 |
| Olfr243     | 0,08  | 0,861699479 | -0,38 | 0,582502577 | 0,12  | 0,830336321 | -0,03 | 0,959958662 | -0,01 | 0,99007652  |
| Olfr248     | 0,23  | 0,617833707 | -0,19 | 0,65931908  | -0,26 | 0,597763422 | 0,14  | 0,716055856 | 0     | 0,996085757 |
| Olfr25      | 0,15  | 0,721797378 | 0,31  | 0,508907274 | -0,01 | 0,987881795 | -0,29 | 0,399928823 | 0,07  | 0,920748161 |
| Olfr251     | 0,16  | 0,740529913 | 0,07  | 0,966717367 | -0,27 | 0,715403033 | 0,04  | 0,94180692  | 0,04  | 0,975986697 |
| Olfr255     | 0,05  | 0,91694318  | 0,13  | 0,824372931 | -0,25 | 0,711793051 | -0,04 | 0,943864463 | -0,1  | 0,913978885 |
| Olfr259     | 0,33  | 0,534265938 | 0,24  | 0,800076546 | -0,12 | 0,942486989 | -0,22 | 0,569594794 | -0,23 | 0,726042963 |
| Olfr26      | 0,09  | 0,915571815 | 0,09  | 0,84786877  | -0,15 | 0,804668222 | -0,16 | 0,679235449 | 0,13  | 0,91314596  |
| Olfr262     | 0,08  | 0,883923631 | -0,02 | 0,979943006 | -0,09 | 0,864411302 | -0,07 | 0,85301747  | -0,06 | 0,948163009 |
| Olfr263     | -0,08 | 0,913921068 | -0,09 | 0,883631611 | -0,07 | 0,941254389 | 0,08  | 0,85301747  | -0,17 | 0,773401088 |
| Olfr266     | 0,14  | 0,791021845 | 0,19  | 0,656542439 | 0,06  | 0,921956183 | 0,01  | 0,978056041 | -0,09 | 0,887185799 |
| Olfr267     | -0,05 | 0,919110324 | 0,18  | 0,900801202 | -0,39 | 0,471873683 | 0,04  | 0,947809027 | 0,14  | 0,904931004 |
| Olfr27      | 0,45  | 0,374444487 | -0,25 | 0,761322524 | -0,08 | 0,906097666 | -0,1  | 0,827764222 | -0,15 | 0,792234713 |
| Olfr270     | -0,07 | 0,908281692 | -0,05 | 0,945143056 | -0,06 | 0,936561816 | 0,01  | 0,98283761  | 0,05  | 0,964566958 |
| Olfr272     | -0,1  | 0,870052902 | 0,52  | 0,510894317 | -0,14 | 0,867109522 | -0,16 | 0,648553343 | 0,18  | 0,795285107 |
| Olfr273     | 0     | 0,999549745 | 0,24  | 0,817056576 | -0,43 | 0,764620512 | -0,71 | 0,30750518  | -0,3  | 0,754898455 |
| Olfr275     | -0,11 | 0,905414735 | 0,17  | 0,868234125 | 0,1   | 0,935887905 | 0,28  | 0,726609135 | 0,04  | 0,97425848  |
| Olfr279     | 0,1   | 0,823375501 | -0,16 | 0,764289173 | -0,03 | 0,973046409 | 0,07  | 0,864263756 | -0,05 | 0,963091661 |
| Olfr281     | 0,04  | 0,981777139 | -0,55 | 0,305866517 | -0,18 | 0,841669036 | 0,41  | 0,650141979 | 0,83  | 0,403930673 |
| Olfr282     | -0,07 | 0,886741208 | 0,01  | 0,982420791 | 0,19  | 0,676418104 | -0,06 | 0,898801714 | -0,05 | 0,952296554 |
| Olfr283     | 0,31  | 0,821263492 | -0,11 | 0,842793123 | 0,15  | 0,863964732 | 0,13  | 0,717622822 | 0,29  | 0,694233384 |
| Olfr284     | 0,15  | 0,714127381 | 0,1   | 0,859954464 | -0,25 | 0,735273501 | -0,09 | 0,807661309 | -0,24 | 0,702993783 |
| Olfr286     | 0,14  | 0,832513798 | -0,12 | 0,850001559 | -0,36 | 0,481504499 | 0,09  | 0,882008164 | -0,03 | 0,97757951  |
| Olfr287     | 0,06  | 0,921628755 | 0,03  | 0,972807995 | 0,1   | 0,8785896   | 0,07  | 0,938950727 | -0,19 | 0,910083563 |
| Olfr288     | -0,36 | 0,690129518 | -0,45 | 0,715688609 | -0,24 | 0,81590485  | -0,01 | 0,996714438 | -0,26 | 0,763321251 |
| Olfr290     | 0,49  | 0,421957622 | 0,09  | 0,945980281 | -0,01 | 0,993071391 | 0,02  | 0,972117662 | 0,17  | 0,814864454 |
| Olfr291     | 0,54  | 0,27735801  | -0,06 | 0,920933203 | -0,1  | 0,864041714 | 0,17  | 0,648154714 | 0,28  | 0,582299997 |
| Olfr292     | 0,22  | 0,664134088 | 0,11  | 0,820851855 | -0,1  | 0,905187981 | 0,09  | 0,85293288  | -0,08 | 0,921263496 |
| Olfr293     | -0,06 | 0,918758168 | 0,04  | 0,956935029 | 0,23  | 0,681398968 | -0,04 | 0,935076398 | 0,08  | 0,926008345 |
| Olfr294     | 0,04  | 0,953269094 | -0,15 | 0,808842286 | -0,16 | 0,809382137 | -0,17 | 0,753845895 | 0,1   | 0,925858284 |
| Olfr297     | 0,14  | 0,757251078 | -0,14 | 0,807175471 | 0,07  | 0,921956183 | 0,06  | 0,900918368 | 0,05  | 0,979152939 |
| Olfr298     | 0,34  | 0,397054492 | -0,03 | 0,971647969 | -0,21 | 0,737241227 | 0,27  | 0,729392851 | 0,4   | 0,699501242 |



|            |       |             |       |             |       |             |       |             |       |             |
|------------|-------|-------------|-------|-------------|-------|-------------|-------|-------------|-------|-------------|
| Olfr299    | 0,29  | 0,687662951 | 0,38  | 0,565603216 | -0,01 | 0,989772079 | -0,51 | 0,232916568 | -0,45 | 0,447019099 |
| Olfr29-ps1 | -0,21 | 0,647337606 | 0,23  | 0,804576975 | -0,04 | 0,947881687 | -0,17 | 0,65865291  | -0,06 | 0,951429597 |
| Olfr3      | -0,07 | 0,919567534 | 0,08  | 0,932429589 | -0,26 | 0,71713065  | -0,32 | 0,540370977 | -0,36 | 0,581679349 |
| Olfr30     | 0,05  | 0,910176431 | -0,12 | 0,836404534 | 0,04  | 0,954031929 | 0,29  | 0,48263084  | -0,06 | 0,940438527 |
| Olfr301    | -0,08 | 0,908527886 | -0,22 | 0,818613446 | -0,56 | 0,387489243 | -0,64 | 0,460526751 | -0,08 | 0,953106258 |
| Olfr303    | 0,07  | 0,908415884 | 0     | 0,998184777 | 0,06  | 0,938771378 | -0,06 | 0,906178596 | -0,1  | 0,905758282 |
| Olfr304    | 0,23  | 0,704720946 | 0,12  | 0,85154774  | -0,05 | 0,959650277 | 0,05  | 0,908141892 | 0,02  | 0,985266733 |
| Olfr305    | 0,23  | 0,57470206  | 0     | 1           | 0,04  | 0,953053908 | -0,08 | 0,847194434 | 0,04  | 0,95421799  |
| Olfr307    | 0,11  | 0,81630789  | -0,25 | 0,58591598  | -0,01 | 0,987563007 | -0,02 | 0,982212444 | -0,04 | 0,971058066 |
| Olfr308    | -0,19 | 0,819634768 | 0,01  | 0,994567885 | -0,47 | 0,199678278 | -0,19 | 0,810891431 | -0,06 | 0,960000999 |
| Olfr309    | -0,17 | 0,886680488 | -0,46 | 0,667422905 | -0,04 | 0,96858449  | 0,02  | 0,967866794 | 0,13  | 0,864540232 |
| Olfr31     | 0,08  | 0,907391935 | -0,1  | 0,832928559 | -0,07 | 0,924910686 | -0,03 | 0,947551542 | -0,02 | 0,983469081 |
| Olfr310    | -0,16 | 0,85846743  | 0,21  | 0,629834033 | -0,08 | 0,923396625 | -0,71 | 0,173468279 | -0,43 | 0,374616846 |
| Olfr311    | -0,07 | 0,948926586 | -0,06 | 0,926157704 | 0,04  | 0,9638718   | 0,29  | 0,541083981 | -0,14 | 0,875421436 |
| Olfr312    | 0,39  | 0,410222229 | 0,1   | 0,829391238 | -0,69 | 0,132145425 | -0,23 | 0,597708995 | -0,03 | 0,979152939 |
| Olfr313    | 0,41  | 0,597519827 | 0,3   | 0,686540452 | 0     | 0,999931921 | -0,2  | 0,707017069 | 0     | 0,998444219 |
| Olfr314    | -0,4  | 0,774822327 | 0,67  | 0,568282579 | -0,37 | 0,775163644 | -0,44 | 0,620416677 | -0,27 | 0,830086988 |
| Olfr315    | -0,21 | 0,651732317 | 0,05  | 0,95775423  | 0,22  | 0,743001036 | -0,76 | 0,129429448 | -0,06 | 0,947657002 |
| Olfr316    | 0,18  | 0,840658059 | -1,66 | 0,087315688 | 0,9   | 0,441256791 | 0,75  | 0,209389801 | -0,63 | 0,424366471 |
| Olfr317    | -0,08 | 0,942119638 | 0,13  | 0,855607772 | 0     | 0,999715683 | -0,3  | 0,697336477 | -0,06 | 0,967522546 |
| Olfr319    | 0,08  | 0,854412004 | 0,01  | 0,994161588 | 0,01  | 0,988511024 | 0,03  | 0,957432042 | 0,06  | 0,950308536 |
| Olfr32     | -0,16 | 0,770273483 | 0,31  | 0,635290128 | -0,12 | 0,872313115 | -0,22 | 0,697069532 | -0,15 | 0,879418817 |
| Olfr322    | -0,08 | 0,911074343 | -0,11 | 0,850222488 | -0,19 | 0,770526999 | 0,16  | 0,852024171 | -0,13 | 0,900126162 |
| Olfr323    | 0,21  | 0,712996883 | 0,05  | 0,917256002 | -0,28 | 0,548750983 | -0,08 | 0,853446222 | -0,13 | 0,860292816 |
| Olfr324    | -0,15 | 0,876598081 | 0,22  | 0,86672735  | -0,24 | 0,720069267 | -0,12 | 0,896260492 | -0,26 | 0,739851808 |
| Olfr325    | -0,2  | 0,700762684 | -0,16 | 0,756514853 | -0,27 | 0,638965268 | -0,3  | 0,450283107 | -0,54 | 0,219210988 |
| Olfr328    | 0,33  | 0,721378796 | -0,23 | 0,693906911 | -0,47 | 0,36411466  | 0,29  | 0,564687528 | 0,21  | 0,767310323 |
| Olfr329-ps | 0,08  | 0,87452227  | -0,04 | 0,935984823 | -0,07 | 0,938291859 | 0,22  | 0,62736758  | 0,27  | 0,628728585 |
| Olfr33     | -0,11 | 0,813604928 | -0,19 | 0,789051952 | -0,27 | 0,549446867 | 0,04  | 0,920066528 | 0,05  | 0,960974478 |
| Olfr330    | -0,26 | 0,522710796 | -0,02 | 0,994424327 | 0,01  | 0,995007689 | -0,1  | 0,806596364 | 0,04  | 0,976743304 |
| Olfr331    | 0,95  | 0,149941264 | -0,07 | 0,986782918 | -1,04 | 0,12691088  | 0,36  | 0,882842038 | -0,31 | 0,872242794 |
| Olfr332    | -0,05 | 0,937444361 | -0,04 | 0,936837377 | -0,29 | 0,571623199 | 0,02  | 0,967866794 | -0,14 | 0,836715889 |
| Olfr338    | 0,23  | 0,68194299  | 0,16  | 0,818889977 | -0,1  | 0,907130828 | -0,17 | 0,828588529 | -0,09 | 0,930863234 |
| Olfr339    | 0,37  | 0,785012364 | 0,09  | 0,903504389 | -0,12 | 0,871001035 | -0,04 | 0,932800758 | 0,13  | 0,868992925 |
| Olfr340    | 0     | 0,996219097 | 0,06  | 0,900801202 | -0,23 | 0,676936654 | 0,12  | 0,742706747 | 0     | 0,997856047 |

|            |       |             |       |             |       |             |       |             |       |             |
|------------|-------|-------------|-------|-------------|-------|-------------|-------|-------------|-------|-------------|
| Olfr341    | 0,22  | 0,803761785 | -0,05 | 0,914574907 | -0,42 | 0,514700536 | -0,02 | 0,979509623 | -0,3  | 0,788761628 |
| Olfr342    | -0,04 | 0,948926586 | 0,16  | 0,765325717 | 0,22  | 0,683975246 | 0,1   | 0,855041248 | 0,05  | 0,961626084 |
| Olfr344    | -0,13 | 0,742013855 | 0,13  | 0,788987411 | -0,33 | 0,496595203 | 0,15  | 0,75917137  | 0,24  | 0,796910241 |
| Olfr345    | 0,07  | 0,936871609 | 0     | 1           | 0,04  | 0,96858449  | 0,21  | 0,758588473 | -0,08 | 0,9478833   |
| Olfr346    | 0,06  | 0,927080959 | -0,08 | 0,914952205 | -0,07 | 0,9122363   | -0,04 | 0,963702683 | -0,04 | 0,978974612 |
| Olfr347    | -0,31 | 0,652819827 | 0,03  | 0,961370411 | -0,17 | 0,835527943 | 0,13  | 0,716994919 | 0,04  | 0,968130547 |
| Olfr348    | -0,11 | 0,825389612 | -0,03 | 0,954343854 | 0,07  | 0,923350407 | -0,39 | 0,672571582 | -0,1  | 0,950308536 |
| Olfr350    | 0,19  | 0,83030751  | 0,12  | 0,807463629 | -0,05 | 0,947460329 | -0,11 | 0,828126679 | -0,1  | 0,916263404 |
| Olfr351    | 0,34  | 0,430696208 | -0,16 | 0,764299173 | -0,21 | 0,756257368 | 0,24  | 0,669818496 | -0,09 | 0,921571761 |
| Olfr352    | 0,14  | 0,715167592 | 0,02  | 0,964757836 | -0,27 | 0,628048897 | 0,01  | 0,987316384 | 0,4   | 0,505878125 |
| Olfr353    | 0,24  | 0,699410601 | -0,14 | 0,767178812 | -0,4  | 0,413940212 | -0,12 | 0,793276304 | 0,07  | 0,922577223 |
| Olfr354    | -0,9  | 0,176807544 | -0,22 | 0,922399849 | 0,64  | 0,400292908 | 0,99  | 0,475216812 | 0,59  | 0,74933755  |
| Olfr355    | 0,21  | 0,619769947 | 0,07  | 0,883895522 | -0,11 | 0,847688308 | -0,07 | 0,87811903  | 0,03  | 0,973428839 |
| Olfr356    | 0,15  | 0,799145501 | -0,01 | 0,99357702  | -0,28 | 0,620837479 | 0,03  | 0,953206567 | 0,14  | 0,825862506 |
| Olfr357    | 0,3   | 0,421029929 | 0,36  | 0,704681588 | -0,07 | 0,927301763 | 0,11  | 0,770159985 | 0,09  | 0,911850421 |
| Olfr358    | -0,22 | 0,629941917 | 0,17  | 0,841665238 | -0,13 | 0,830594849 | -0,09 | 0,833803403 | -0,31 | 0,554975763 |
| Olfr360    | -0,08 | 0,925460743 | 0,19  | 0,68630659  | 0,01  | 0,996286252 | -0,14 | 0,800853287 | -0,49 | 0,447019099 |
| Olfr361    | -0,05 | 0,953324702 | -0,1  | 0,852719676 | -0,03 | 0,968638834 | 0,29  | 0,561656192 | 0,02  | 0,983506123 |
| Olfr362    | 0,06  | 0,893283341 | -0,09 | 0,898869062 | -0,19 | 0,682309944 | 0,01  | 0,983166423 | -0,07 | 0,94919447  |
| Olfr365    | 0,2   | 0,597519827 | 0,15  | 0,899590014 | 0,12  | 0,914867655 | -0,33 | 0,420008152 | 0,14  | 0,849560772 |
| Olfr366    | 0,02  | 0,978347418 | 0,15  | 0,770521007 | -0,07 | 0,911506558 | -0,25 | 0,617886476 | -0,02 | 0,984171253 |
| Olfr367-ps | 0,09  | 0,850491134 | 0,13  | 0,763796207 | -0,05 | 0,952019801 | 0,03  | 0,9540749   | -0,16 | 0,800540569 |
| Olfr368    | 0,1   | 0,826457489 | 0,01  | 0,98459889  | 0,11  | 0,846689137 | 0,07  | 0,858632076 | -0,16 | 0,879072575 |
| Olfr370    | 0,11  | 0,886680488 | -0,1  | 0,969314504 | -0,22 | 0,720389578 | 0,03  | 0,95498216  | 0,34  | 0,617249007 |
| Olfr371    | 0     | 0,996219097 | -0,14 | 0,804868131 | -0,24 | 0,695705149 | 0,26  | 0,466887908 | 0,26  | 0,649339908 |
| Olfr372    | 0,46  | 0,400980668 | -0,26 | 0,628150395 | -0,14 | 0,846498816 | 0     | 0,996769706 | -0,1  | 0,913274952 |
| Olfr373    | 0,23  | 0,792297169 | 0,15  | 0,867324954 | -0,54 | 0,691009366 | -0,1  | 0,903739255 | -0,05 | 0,973576804 |
| Olfr374    | 0,19  | 0,699906083 | 0,14  | 0,772814225 | -0,06 | 0,932706021 | 0,23  | 0,635378562 | 0,31  | 0,632958559 |
| Olfr376    | 0,29  | 0,546166185 | -0,23 | 0,664380401 | -0,06 | 0,942486989 | 0,15  | 0,799835488 | -0,39 | 0,587915673 |
| Olfr378    | 0,09  | 0,922118639 | 0,09  | 0,85597055  | -0,25 | 0,722038407 | 0,22  | 0,598024603 | 0,09  | 0,928764431 |
| Olfr38     | 0     | 0,999620531 | -0,32 | 0,813423328 | 0     | 0,997268369 | 0,29  | 0,778817721 | -0,07 | 0,935288547 |
| Olfr380    | 0,22  | 0,679505507 | 0,03  | 0,974890527 | -0,03 | 0,971175121 | 0,04  | 0,940734733 | -0,01 | 0,989226742 |
| Olfr381    | 0,47  | 0,448827508 | -0,04 | 0,958545812 | -0,1  | 0,930836343 | -0,05 | 0,95498216  | 0,1   | 0,924431292 |
| Olfr382    | 0,1   | 0,862360472 | 0,02  | 0,982786635 | -0,21 | 0,641366948 | 0,02  | 0,973899233 | 0,06  | 0,938265452 |
| Olfr384    | -0,15 | 0,820785667 | 0,1   | 0,82304324  | 0,1   | 0,897528177 | 0,08  | 0,87613802  | 0,04  | 0,96377007  |

|             |       |             |       |             |       |             |       |             |       |             |
|-------------|-------|-------------|-------|-------------|-------|-------------|-------|-------------|-------|-------------|
| Olfr385     | 0,21  | 0,738714467 | -0,03 | 0,956049982 | 0,11  | 0,853523269 | 0,05  | 0,909976349 | -0,11 | 0,887719506 |
| Olfr389     | -0,09 | 0,84900712  | -0,35 | 0,574169665 | -0,48 | 0,353640428 | 0,24  | 0,721011317 | 0,06  | 0,951471487 |
| Olfr39      | 0,06  | 0,919110324 | 0,27  | 0,553077784 | -0,09 | 0,897233315 | 0,04  | 0,942269183 | 0,03  | 0,978315253 |
| Olfr390     | -0,76 | 0,519823113 | 0,79  | 0,583764309 | -0,31 | 0,777745152 | -1,16 | 0,077730739 | -0,41 | 0,654016085 |
| Olfr391-ps  | 0,01  | 0,991919022 | -0,11 | 0,808168923 | -0,18 | 0,786634846 | 0,13  | 0,773887201 | 0,47  | 0,554975763 |
| Olfr393     | 0,14  | 0,791295946 | 0,13  | 0,813541606 | -0,06 | 0,922318683 | -0,13 | 0,723006185 | 0,02  | 0,981452448 |
| Olfr394     | -0,14 | 0,792313188 | -0,18 | 0,652687886 | -0,04 | 0,958851839 | 0,1   | 0,792680799 | 0,1   | 0,879206646 |
| Olfr395     | 0,22  | 0,578621914 | 0     | 1           | -0,01 | 0,990836784 | -0,02 | 0,967883559 | -0,2  | 0,713101025 |
| Olfr397     | 0,12  | 0,831697563 | 0,26  | 0,66616142  | -0,09 | 0,895851577 | -0,16 | 0,773729837 | 0,03  | 0,980961333 |
| Olfr398     | 0,15  | 0,723617184 | 0,16  | 0,747707816 | -0,34 | 0,560830769 | -0,34 | 0,440885474 | -0,35 | 0,571667115 |
| Olfr399     | -0,65 | 0,733257266 | -0,12 | 0,966305338 | -0,58 | 0,709222239 | 0,45  | 0,398276111 | -0,98 | 0,083118156 |
| Olfr401     | 0,02  | 0,967731408 | 0     | 1           | -0,04 | 0,968996595 | -0,04 | 0,932315462 | -0,44 | 0,562557824 |
| Olfr402     | -0,09 | 0,897583596 | 0,1   | 0,893816641 | -0,02 | 0,981490968 | 0,01  | 0,980883383 | -0,1  | 0,885673683 |
| Olfr406     | 0,09  | 0,91664986  | 0     | 1           | 0,05  | 0,943472333 | 0,42  | 0,384870426 | 0,21  | 0,750359224 |
| Olfr410     | -0,03 | 0,96263856  | 0,25  | 0,666450149 | -0,23 | 0,658715153 | 0,04  | 0,931477012 | 0,12  | 0,882866315 |
| Olfr411     | 0,09  | 0,833900133 | 0,19  | 0,666450149 | -0,14 | 0,872968292 | -0,2  | 0,632621178 | 0     | 0,9969305   |
| Olfr412     | 0,15  | 0,727137147 | 0,16  | 0,732847182 | -0,08 | 0,917694073 | -0,34 | 0,452578546 | 0,04  | 0,964461643 |
| Olfr414     | 0,16  | 0,698332739 | 0,05  | 0,932292974 | -0,04 | 0,953622038 | 0     | 1           | 0,26  | 0,640213665 |
| Olfr417     | 0,28  | 0,431696884 | 0,03  | 0,959239915 | -0,14 | 0,895782914 | 0,27  | 0,576295027 | 0,19  | 0,841160223 |
| Olfr418     | -0,49 | 0,639346687 | -0,2  | 0,889215021 | 0,04  | 0,977967694 | -0,13 | 0,908040243 | -0,2  | 0,832848337 |
| Olfr419     | 0,44  | 0,735655654 | 0,12  | 0,855632384 | -1,24 | 0,219362501 | -0,09 | 0,911000608 | -0,35 | 0,674907074 |
| Olfr420     | 0,19  | 0,851527409 | -0,31 | 0,683992749 | -0,15 | 0,8290371   | -0,29 | 0,636853084 | 0,22  | 0,846075697 |
| Olfr421-ps1 | -0,15 | 0,738379098 | -0,08 | 0,940046211 | 0,15  | 0,871929853 | -0,53 | 0,315587223 | -0,14 | 0,823098095 |
| Olfr424     | 0,11  | 0,852198853 | 0,41  | 0,54328014  | 0,03  | 0,969499162 | -0,36 | 0,436661219 | -0,34 | 0,497340464 |
| Olfr429     | 0,1   | 0,848783415 | 0,02  | 0,975103597 | 0,07  | 0,919116989 | 0,08  | 0,897469459 | 0,02  | 0,985269236 |
| Olfr43      | 0,09  | 0,936139343 | 0,03  | 0,975959817 | 0,12  | 0,81745518  | 0,13  | 0,812048135 | -0,06 | 0,947733697 |
| Olfr430     | 0,38  | 0,304477485 | 0,09  | 0,842793123 | -0,16 | 0,76657807  | -0,09 | 0,896599656 | 0,22  | 0,799510708 |
| Olfr432     | 0,2   | 0,686076441 | 0,01  | 0,989589635 | -0,33 | 0,505956773 | 0     | 1           | -0,13 | 0,863544853 |
| Olfr433     | 0,23  | 0,642618049 | -0,02 | 0,982786635 | 0,02  | 0,987208663 | -0,02 | 0,967866794 | -0,15 | 0,800540569 |
| Olfr434     | 0,03  | 0,975506993 | 0,23  | 0,887880825 | -0,06 | 0,948637233 | -0,11 | 0,813711032 | 0,22  | 0,728578071 |
| Olfr435     | 0,07  | 0,880122447 | 0,05  | 0,919762719 | 0,05  | 0,95106142  | -0,2  | 0,689014604 | 0     | 0,997044214 |
| Olfr437     | 0,26  | 0,468135601 | -0,36 | 0,633533351 | -0,33 | 0,516309915 | 0,28  | 0,511754943 | -0,02 | 0,986436695 |
| Olfr44      | 0,1   | 0,832798869 | -0,09 | 0,898952381 | 0     | 0,997865616 | -0,01 | 0,988205241 | -0,02 | 0,982321176 |
| Olfr444     | -0,01 | 0,991919022 | 0,15  | 0,781951913 | -0,19 | 0,714346477 | -0,3  | 0,402472168 | -0,09 | 0,910083563 |
| Olfr446     | 0,07  | 0,899314698 | 0,02  | 0,972706967 | 0,09  | 0,90345282  | 0,05  | 0,938111911 | 0,22  | 0,775103985 |

|         |       |             |       |             |       |             |       |             |       |             |
|---------|-------|-------------|-------|-------------|-------|-------------|-------|-------------|-------|-------------|
| Olfr447 | 0,02  | 0,966775766 | 0,01  | 0,993221425 | -0,07 | 0,908847112 | 0     | 1           | -0,04 | 0,957620856 |
| Olfr448 | -0,3  | 0,722262013 | -0,21 | 0,762295026 | -0,23 | 0,648134387 | 0,22  | 0,645842474 | -0,18 | 0,840036408 |
| Olfr449 | 0,38  | 0,633284194 | 0,05  | 0,954948291 | -0,49 | 0,242692494 | 0,24  | 0,775232056 | -0,1  | 0,906117814 |
| Olfr45  | 0,04  | 0,962030279 | 0,24  | 0,681670055 | -0,31 | 0,785121895 | -0,11 | 0,783708375 | 0,35  | 0,443943915 |
| Olfr450 | -0,1  | 0,811275275 | 0,06  | 0,912535732 | -0,02 | 0,978207511 | -0,28 | 0,369060925 | -0,17 | 0,799596237 |
| Olfr452 | 0,24  | 0,798561927 | 0,21  | 0,79526023  | 0,17  | 0,737241227 | 0,05  | 0,943143586 | -0,12 | 0,890833196 |
| Olfr453 | 0,12  | 0,808947569 | 0,44  | 0,345409693 | -0,06 | 0,938771378 | -0,24 | 0,560223278 | 0,14  | 0,866693394 |
| Olfr455 | -0,05 | 0,923035054 | -0,06 | 0,932292974 | -0,06 | 0,922318683 | -0,02 | 0,973986088 | -0,2  | 0,760587652 |
| Olfr456 | 0,13  | 0,777335496 | -0,02 | 0,969019461 | -0,04 | 0,961337501 | 0,15  | 0,709465672 | 0,26  | 0,647258599 |
| Olfr457 | 0,19  | 0,656726345 | -0,11 | 0,898154642 | -0,16 | 0,798711591 | -0,05 | 0,966834679 | 0,12  | 0,925858284 |
| Olfr458 | 0,19  | 0,690495549 | 0,04  | 0,940111449 | -0,24 | 0,704279802 | -0,13 | 0,857884225 | -0,1  | 0,902802615 |
| Olfr459 | 0     | 0,998345859 | -0,04 | 0,963791015 | -0,13 | 0,810305776 | -0,12 | 0,8914104   | -0,44 | 0,612498576 |
| Olfr46  | 0,03  | 0,970938013 | 0,48  | 0,325242663 | -0,05 | 0,964695682 | -0,44 | 0,598024603 | 0,09  | 0,940878193 |
| Olfr460 | -0,19 | 0,730710327 | 0,18  | 0,81092512  | 0,18  | 0,737186074 | -0,08 | 0,873872972 | -0,23 | 0,728388857 |
| Olfr461 | 0,12  | 0,763657448 | 0,03  | 0,954024651 | -0,11 | 0,877366773 | 0,07  | 0,876545851 | -0,05 | 0,971058066 |
| Olfr462 | 0,08  | 0,91048699  | -0,31 | 0,641792237 | -0,24 | 0,791940256 | 0,2   | 0,757938082 | 0,06  | 0,950267521 |
| Olfr463 | -0,04 | 0,94727537  | 0,2   | 0,804394095 | 0,03  | 0,9728699   | -0,4  | 0,216241884 | -0,33 | 0,498598092 |
| Olfr464 | -0,08 | 0,876019664 | 0,02  | 0,984000632 | 0,14  | 0,804784019 | -0,11 | 0,874904932 | 0     | 0,996614425 |
| Olfr466 | 0,08  | 0,893143496 | -0,18 | 0,727706787 | -0,37 | 0,530318769 | -0,01 | 0,978803096 | -0,18 | 0,780424988 |
| Olfr467 | -0,45 | 0,422668323 | 0,14  | 0,862430716 | 0,5   | 0,593455611 | -0,01 | 0,992183086 | 0,32  | 0,68987325  |
| Olfr469 | 0,03  | 0,960157961 | 0,02  | 0,977588305 | 0,04  | 0,969921108 | 0,18  | 0,718553452 | 0     | 0,995462242 |
| Olfr47  | 0,08  | 0,928733836 | 0,16  | 0,841398333 | -0,03 | 0,982305856 | -0,04 | 0,961017713 | 0,26  | 0,666026291 |
| Olfr470 | -0,05 | 0,936139343 | 0,16  | 0,73623784  | -0,01 | 0,993935103 | 0,09  | 0,883425466 | 0,05  | 0,963903981 |
| Olfr472 | -0,48 | 0,687662951 | -0,43 | 0,801513852 | 0,02  | 0,993686224 | 0,34  | 0,709459337 | 0,09  | 0,978325984 |
| Olfr473 | -0,13 | 0,800209334 | 0,05  | 0,912352597 | -0,14 | 0,826840894 | 0,05  | 0,900691702 | 0,02  | 0,982175252 |
| Olfr474 | 0,2   | 0,700994646 | 0,19  | 0,732044571 | -0,24 | 0,688889202 | 0,09  | 0,833814295 | 0,41  | 0,443159458 |
| Olfr476 | 0     | 0,997842309 | -0,12 | 0,821320934 | -0,11 | 0,878636183 | 0,11  | 0,749306304 | 0,11  | 0,874716101 |
| Olfr477 | -0,06 | 0,908281692 | -0,05 | 0,915833614 | 0,05  | 0,940056885 | 0,02  | 0,9704566   | 0,11  | 0,872998211 |
| Olfr478 | -0,03 | 0,964216121 | 0,12  | 0,846383323 | 0,12  | 0,837177015 | -0,14 | 0,679463308 | -0,23 | 0,74624632  |
| Olfr479 | 0,21  | 0,621890075 | -0,04 | 0,935984823 | -0,02 | 0,979214168 | 0,05  | 0,906993005 | -0,04 | 0,963377414 |
| Olfr48  | -0,03 | 0,96108798  | 0,15  | 0,799806796 | -0,17 | 0,746350816 | -0,22 | 0,584887631 | 0,24  | 0,651115478 |
| Olfr480 | 0,35  | 0,45544471  | -0,33 | 0,463318914 | 0,07  | 0,923350407 | 0,03  | 0,953222061 | -0,12 | 0,84970727  |
| Olfr481 | -0,03 | 0,956248093 | 0,16  | 0,840784209 | -0,1  | 0,874245615 | -0,08 | 0,846481602 | 0,12  | 0,859663155 |
| Olfr482 | -0,04 | 0,944060462 | 0,3   | 0,581931436 | 0,03  | 0,976092199 | -0,03 | 0,937627059 | 0,21  | 0,703074502 |
| Olfr483 | 0,28  | 0,597519827 | -0,08 | 0,859816636 | -0,37 | 0,495145157 | -0,01 | 0,988205241 | -0,09 | 0,912683275 |

|         |       |             |       |             |       |             |       |             |       |             |
|---------|-------|-------------|-------|-------------|-------|-------------|-------|-------------|-------|-------------|
| Olfr484 | -0,32 | 0,494679097 | 0,11  | 0,932292974 | -0,25 | 0,589788344 | 0,05  | 0,970931237 | 0,11  | 0,915238726 |
| Olfr485 | -0,38 | 0,427374823 | 0,06  | 0,916496897 | -0,38 | 0,595535442 | 0,01  | 0,982212444 | 0,08  | 0,906338603 |
| Olfr486 | -0,12 | 0,793209485 | 0,26  | 0,51825831  | -0,35 | 0,544583457 | -0,23 | 0,619346712 | -0,08 | 0,939948423 |
| Olfr487 | -0,08 | 0,868854341 | 0,02  | 0,9777932   | -0,2  | 0,663214163 | -0,12 | 0,74236057  | -0,05 | 0,948759136 |
| Olfr488 | -0,04 | 0,954517543 | -0,03 | 0,950055434 | -0,23 | 0,718601435 | 0,13  | 0,716994919 | 0,27  | 0,615772692 |
| Olfr49  | 0,31  | 0,53293469  | 0,17  | 0,701851604 | 0,01  | 0,991168026 | -0,15 | 0,726953267 | 0,13  | 0,859663155 |
| Olfr490 | 0,19  | 0,711014568 | 0,04  | 0,95554321  | -0,11 | 0,895496199 | 0,12  | 0,8914104   | -0,24 | 0,716515103 |
| Olfr491 | 0,18  | 0,728516314 | -0,04 | 0,938711163 | -0,51 | 0,375948654 | 0     | 1           | -0,05 | 0,950267521 |
| Olfr492 | 0,86  | 0,205139432 | 0,24  | 0,805467498 | -0,28 | 0,713620433 | 0,27  | 0,61376839  | -0,04 | 0,966951657 |
| Olfr493 | 0,5   | 0,470397003 | 0,05  | 0,920755087 | -0,36 | 0,503491003 | 0,14  | 0,715825968 | 0,13  | 0,885872093 |
| Olfr494 | 0,88  | 0,519611795 | -0,02 | 0,972706967 | 0,02  | 0,977897176 | 0,08  | 0,879527088 | -0,14 | 0,843383597 |
| Olfr495 | 0,19  | 0,743873094 | 0,05  | 0,967338233 | 0,05  | 0,953456022 | 0,06  | 0,93129706  | 0,03  | 0,974245495 |
| Olfr497 | 0,08  | 0,912690185 | 0,15  | 0,804543872 | 0,05  | 0,947460329 | -0,15 | 0,669280975 | 0     | 0,999775166 |
| Olfr498 | 0     | 0,998769353 | 0,06  | 0,901000778 | -0,22 | 0,702689055 | 0,08  | 0,855513966 | 0,03  | 0,971990739 |
| Olfr5   | 0,08  | 0,903817676 | 0,23  | 0,643631572 | -0,15 | 0,77115153  | -0,32 | 0,371919494 | 0,12  | 0,866285506 |
| Olfr50  | -0,06 | 0,939647483 | 0,07  | 0,880473303 | -0,17 | 0,77568242  | -0,36 | 0,528687578 | -0,28 | 0,753328965 |
| Olfr502 | 0,15  | 0,832947001 | 0,69  | 0,132936625 | 0,13  | 0,837999835 | -0,07 | 0,91882405  | 0,05  | 0,960974478 |
| Olfr503 | -0,25 | 0,761457464 | -0,13 | 0,748874675 | 0,01  | 0,989909058 | 0,05  | 0,983166423 | -0,49 | 0,716229308 |
| Olfr504 | 0,21  | 0,586753542 | 0,2   | 0,660815642 | -0,1  | 0,885109831 | -0,19 | 0,598657551 | 0,19  | 0,747828814 |
| Olfr506 | 0,34  | 0,66331039  | -0,17 | 0,810635763 | -0,3  | 0,708823412 | 0,01  | 0,983166423 | 0,03  | 0,976743304 |
| Olfr507 | -0,07 | 0,904541231 | -0,03 | 0,957390629 | -0,28 | 0,702677589 | 0,01  | 0,98846249  | 0,19  | 0,823087355 |
| Olfr508 | 0,38  | 0,755100499 | 0,09  | 0,872690378 | -0,19 | 0,782022139 | 0,06  | 0,910298592 | -0,06 | 0,940878193 |
| Olfr509 | 0,06  | 0,909284689 | -0,01 | 0,992929085 | -0,23 | 0,661089127 | 0,07  | 0,855041248 | -0,03 | 0,977967676 |
| Olfr51  | 0,1   | 0,898116888 | 0,11  | 0,80678645  | 0,01  | 0,991477426 | 0,05  | 0,910640253 | 0,2   | 0,760042789 |
| Olfr510 | 0,26  | 0,764189777 | -0,2  | 0,842020641 | -0,51 | 0,343594254 | -0,17 | 0,874700062 | 0,14  | 0,904040121 |
| Olfr512 | 0,22  | 0,561414711 | 0,24  | 0,677485135 | -0,08 | 0,914301036 | -0,14 | 0,6876055   | -0,02 | 0,984125319 |
| Olfr513 | 0,15  | 0,7471174   | -0,05 | 0,910284662 | -0,22 | 0,689058581 | -0,01 | 0,987801512 | -0,08 | 0,918465043 |
| Olfr514 | 0,15  | 0,72951086  | 0,13  | 0,781665479 | -0,04 | 0,953951069 | -0,1  | 0,800117708 | 0,07  | 0,939127163 |
| Olfr516 | 0,3   | 0,459989765 | 0,08  | 0,876503933 | -0,23 | 0,644778361 | -0,11 | 0,763690382 | 0,19  | 0,773503402 |
| Olfr517 | -0,19 | 0,805313174 | -0,01 | 0,989873399 | 0,13  | 0,840187016 | -0,04 | 0,920640884 | -0,15 | 0,824818547 |
| Olfr518 | 0,24  | 0,530199446 | 0     | 1           | -0,26 | 0,647928093 | 0,17  | 0,658011013 | 0,02  | 0,984125319 |
| Olfr519 | 0,54  | 0,422033372 | -0,51 | 0,457889449 | -0,15 | 0,844941845 | 0,32  | 0,60918576  | -0,11 | 0,936278784 |
| Olfr52  | 0,28  | 0,508688727 | 0,08  | 0,883145635 | -0,02 | 0,980639134 | -0,02 | 0,962670023 | -0,17 | 0,8066477   |
| Olfr520 | -0,05 | 0,946235559 | 0,02  | 0,970832543 | 0,05  | 0,932866273 | -0,28 | 0,621810528 | -0,25 | 0,774826589 |
| Olfr521 | -0,1  | 0,810101389 | 0,06  | 0,900801202 | -0,07 | 0,91684234  | 0,15  | 0,806596364 | 0,02  | 0,986849867 |

|         |       |             |       |             |       |             |       |             |       |             |
|---------|-------|-------------|-------|-------------|-------|-------------|-------|-------------|-------|-------------|
| Olfr522 | 0,14  | 0,889867231 | -0,07 | 0,940046211 | 0,31  | 0,692825782 | 0,07  | 0,878911014 | 0,04  | 0,969117862 |
| Olfr523 | 0,02  | 0,972112267 | -0,09 | 0,873107937 | 0,12  | 0,863964732 | 0,16  | 0,712672435 | -0,07 | 0,940149515 |
| Olfr524 | 0,28  | 0,678433901 | -0,19 | 0,828219939 | -0,24 | 0,806044178 | 0,24  | 0,591139075 | -0,05 | 0,965244101 |
| Olfr525 | 0,05  | 0,94902211  | 0,05  | 0,979551751 | 0,19  | 0,814575035 | -0,2  | 0,845272376 | -0,51 | 0,255341799 |
| Olfr527 | 0,06  | 0,917836966 | -0,07 | 0,93451524  | 0,18  | 0,770526999 | 0,16  | 0,696843539 | 0,09  | 0,916003629 |
| Olfr53  | -0,32 | 0,83193828  | 0,04  | 0,992017084 | -0,3  | 0,701508321 | 0,36  | 0,458415694 | 1,01  | 0,235574745 |
| Olfr530 | 0,18  | 0,761457464 | -0,68 | 0,271257402 | -0,25 | 0,744387748 | 0,37  | 0,654567375 | -0,1  | 0,937839957 |
| Olfr531 | 0,03  | 0,963914207 | -0,08 | 0,909551536 | 0,07  | 0,923258105 | -0,28 | 0,640737261 | 0,15  | 0,865866242 |
| Olfr532 | -0,12 | 0,776721795 | 0,14  | 0,761820188 | -0,01 | 0,993686224 | -0,04 | 0,922740736 | 0,07  | 0,935747791 |
| Olfr533 | -0,06 | 0,954648978 | 0,48  | 0,647569143 | 0,1   | 0,899913569 | -0,42 | 0,234549057 | 0,04  | 0,975441362 |
| Olfr535 | 0,61  | 0,191492041 | 0     | 1           | -0,33 | 0,590228748 | -0,21 | 0,809239868 | -0,25 | 0,805592681 |
| Olfr536 | -0,09 | 0,944309453 | 0,05  | 0,958545812 | -0,25 | 0,727262258 | 0,23  | 0,754680425 | 0,1   | 0,927536545 |
| Olfr538 | 0,04  | 0,948926586 | 0,08  | 0,864608777 | -0,33 | 0,497205965 | -0,03 | 0,944481777 | 0,23  | 0,697818445 |
| Olfr539 | 0,08  | 0,852198853 | -0,01 | 0,994137877 | -0,09 | 0,909233941 | 0     | 0,995662115 | -0,01 | 0,992997824 |
| Olfr54  | 0,28  | 0,586970138 | -0,06 | 0,951374483 | -0,31 | 0,603819103 | -0,11 | 0,825908912 | -0,19 | 0,820657685 |
| Olfr541 | -0,62 | 0,536711466 | -0,92 | 0,143690114 | -0,48 | 0,70834039  | 0,03  | 0,983918723 | -0,33 | 0,814438115 |
| Olfr543 | 0,11  | 0,881321415 | 0,05  | 0,932292974 | 0,1   | 0,885263358 | -0,02 | 0,981057922 | -0,18 | 0,757562438 |
| Olfr544 | 0,23  | 0,662416763 | 0,16  | 0,80678645  | -0,44 | 0,43566321  | 0,29  | 0,454745737 | -0,02 | 0,983617617 |
| Olfr545 | -0,02 | 0,965482773 | 0,06  | 0,889696475 | -0,09 | 0,870263371 | -0,01 | 0,975655831 | -0,22 | 0,763240477 |
| Olfr547 | 0,02  | 0,969463578 | 0,02  | 0,969339169 | 0,19  | 0,852300912 | -0,18 | 0,663086411 | -0,13 | 0,911850421 |
| Olfr549 | 0,01  | 0,993728727 | 0     | 1           | -0,12 | 0,838289412 | 0,08  | 0,865580513 | 0,22  | 0,775482866 |
| Olfr55  | -0,01 | 0,978853388 | 0,1   | 0,829839151 | 0,09  | 0,887446966 | -0,24 | 0,604889831 | -0,23 | 0,679932345 |
| Olfr550 | -0,22 | 0,60879435  | -0,14 | 0,787322926 | -0,14 | 0,871284554 | 0,29  | 0,440207451 | 0,08  | 0,92741476  |
| Olfr551 | -0,11 | 0,898592785 | -0,16 | 0,752804236 | -0,21 | 0,793259393 | 0,17  | 0,678009232 | -0,28 | 0,731547438 |
| Olfr552 | 0,05  | 0,926426662 | -0,04 | 0,948496432 | -0,37 | 0,48646529  | -0,16 | 0,799835488 | 0,1   | 0,92627685  |
| Olfr553 | 0,15  | 0,732517598 | 0,03  | 0,974580396 | -0,22 | 0,705915392 | 0,16  | 0,667849424 | 0,3   | 0,590196048 |
| Olfr554 | 0,26  | 0,562609036 | 0,01  | 0,993800088 | -0,49 | 0,309528932 | 0,14  | 0,709570719 | 0,07  | 0,947657002 |
| Olfr555 | -0,06 | 0,947117278 | 0,12  | 0,760411919 | -0,44 | 0,433353965 | -0,16 | 0,703627304 | 0,15  | 0,835786084 |
| Olfr556 | -0,07 | 0,887924135 | 0,07  | 0,88052282  | -0,15 | 0,793014016 | -0,01 | 0,985580087 | 0,03  | 0,976345724 |
| Olfr557 | 0,15  | 0,770273483 | 0,08  | 0,906631077 | 0,07  | 0,921090652 | 0,1   | 0,809856608 | 0,11  | 0,881135847 |
| Olfr558 | -0,46 | 0,576695743 | -0,01 | 0,99305294  | -0,09 | 0,921207094 | -0,83 | 0,139727753 | -0,01 | 0,990091016 |
| Olfr559 | -0,03 | 0,949931783 | -0,01 | 0,992017084 | -0,05 | 0,952366216 | -0,19 | 0,603471344 | -0,13 | 0,844633345 |
| Olfr56  | 1,77  | 0,092850129 | 1,71  | 0,080612373 | -1,32 | 0,628048897 | -0,36 | 0,477503193 | 2,08  | 0,003984113 |
| Olfr560 | 0,22  | 0,796967364 | -0,01 | 0,985764487 | -0,11 | 0,884829622 | -0,3  | 0,41855272  | -0,4  | 0,518022769 |
| Olfr561 | -0,04 | 0,940514265 | 0,05  | 0,94347698  | 0,08  | 0,902637441 | -0,04 | 0,924110762 | 0     | 0,998444219 |

|         |       |             |       |             |       |             |       |             |       |             |
|---------|-------|-------------|-------|-------------|-------|-------------|-------|-------------|-------|-------------|
| Olfr564 | -0,18 | 0,712953325 | 0,02  | 0,972706967 | -0,14 | 0,804576742 | 0,17  | 0,649549729 | -0,07 | 0,947512099 |
| Olfr566 | 0,43  | 0,421029929 | -0,03 | 0,966717367 | -0,23 | 0,660920525 | -0,29 | 0,468562522 | 0,18  | 0,832289552 |
| Olfr568 | -0,17 | 0,764288636 | 0,02  | 0,966078321 | 0,25  | 0,665014536 | 0,19  | 0,537763442 | 0,28  | 0,622053122 |
| Olfr569 | -0,07 | 0,912510949 | -0,2  | 0,738762579 | -0,2  | 0,727548313 | 0,22  | 0,741214227 | 0,39  | 0,670932333 |
| Olfr57  | 0,02  | 0,981777139 | 0,45  | 0,559743815 | -0,67 | 0,548599327 | -0,09 | 0,898641987 | -0,08 | 0,947300798 |
| Olfr570 | 0,07  | 0,91083461  | -0,18 | 0,720902851 | 0,02  | 0,979313019 | -0,03 | 0,940891309 | -0,14 | 0,823098095 |
| Olfr571 | 0,08  | 0,889841351 | -0,11 | 0,853569707 | -0,13 | 0,807786405 | 0,02  | 0,963752888 | -0,08 | 0,914498972 |
| Olfr572 | 0,01  | 0,988538489 | 0,05  | 0,930379126 | -0,06 | 0,950846671 | -0,01 | 0,989926105 | -0,25 | 0,705953802 |
| Olfr574 | -0,01 | 0,989784447 | 0     | 1           | -0,22 | 0,730738549 | 0,04  | 0,954910308 | 0,12  | 0,926008345 |
| Olfr575 | 0,04  | 0,929634271 | -0,09 | 0,855632384 | -0,17 | 0,745313546 | 0,13  | 0,702534189 | -0,17 | 0,791694696 |
| Olfr576 | 0,01  | 0,98703427  | 0,21  | 0,72545882  | -0,16 | 0,825782434 | -0,09 | 0,831764227 | -0,04 | 0,968877669 |
| Olfr577 | 0,21  | 0,622436248 | 0,11  | 0,820191705 | -0,12 | 0,833493578 | -0,01 | 0,983166423 | 0,05  | 0,947437555 |
| Olfr578 | 0,04  | 0,950829291 | 0,05  | 0,938711163 | -0,09 | 0,904057901 | 0,07  | 0,85846312  | 0,08  | 0,931519966 |
| Olfr58  | 0,07  | 0,909304056 | 0,06  | 0,927029048 | -0,03 | 0,960677449 | -0,11 | 0,783023321 | -0,19 | 0,743854135 |
| Olfr582 | -0,1  | 0,923022551 | -0,21 | 0,730536814 | -0,57 | 0,180209764 | 0,56  | 0,319057242 | 0,01  | 0,990091016 |
| Olfr583 | 0,14  | 0,72337861  | -0,1  | 0,893842035 | -0,06 | 0,927950027 | 0,02  | 0,978782666 | 0,08  | 0,922709938 |
| Olfr584 | 0,17  | 0,778869381 | -0,15 | 0,868234125 | -0,24 | 0,707845564 | 0,08  | 0,945619692 | 0,05  | 0,976743304 |
| Olfr585 | 0,09  | 0,867966622 | -0,06 | 0,942714673 | -0,12 | 0,840284573 | 0,12  | 0,746728153 | 0,11  | 0,863496792 |
| Olfr586 | -0,04 | 0,95684213  | -0,02 | 0,974580396 | -0,2  | 0,723987482 | -0,14 | 0,726158589 | 0,1   | 0,884640084 |
| Olfr589 | 0,05  | 0,926181408 | 0,06  | 0,922649946 | -0,08 | 0,921956183 | 0,03  | 0,94649023  | 0,34  | 0,540784242 |
| Olfr591 | -0,17 | 0,703606438 | 0,17  | 0,802979985 | 0,11  | 0,889371168 | 0,02  | 0,972500479 | -0,05 | 0,953297732 |
| Olfr592 | 0,15  | 0,728530978 | -0,09 | 0,842824184 | -0,17 | 0,816710945 | 0,2   | 0,604127556 | 0,2   | 0,765342998 |
| Olfr593 | -0,02 | 0,962857082 | -0,01 | 0,994802028 | 0,13  | 0,834205123 | 0     | 0,997816344 | 0,29  | 0,697757911 |
| Olfr594 | 0,25  | 0,703606438 | 0,06  | 0,905775272 | -0,01 | 0,990836784 | -0,23 | 0,660126195 | -0,07 | 0,948163009 |
| Olfr596 | 0,03  | 0,975108898 | -0,24 | 0,666450149 | -0,02 | 0,984778342 | 0,09  | 0,823463811 | 0,14  | 0,874554354 |
| Olfr597 | -0,01 | 0,99542017  | 0,16  | 0,817110093 | -0,21 | 0,737528157 | -0,02 | 0,967866794 | 0,07  | 0,940092696 |
| Olfr598 | -0,1  | 0,906413574 | 0,18  | 0,732847182 | 0,06  | 0,952245692 | -0,17 | 0,71622756  | -0,21 | 0,796993902 |
| Olfr599 | -0,08 | 0,89763852  | 0,15  | 0,752537667 | 0,01  | 0,994130625 | 0,02  | 0,980342918 | -0,18 | 0,855385791 |
| Olfr6   | 0,17  | 0,810208393 | 0     | 1           | 0,04  | 0,960650487 | -0,03 | 0,965471779 | -0,3  | 0,616680786 |
| Olfr60  | 0,03  | 0,954174818 | 0,18  | 0,74245372  | -0,21 | 0,706842882 | -0,01 | 0,989616509 | -0,09 | 0,898448235 |
| Olfr600 | 0,01  | 0,981042688 | 0,07  | 0,86247587  | -0,08 | 0,89248624  | 0,02  | 0,967047406 | -0,01 | 0,986971861 |
| Olfr601 | -0,19 | 0,775784928 | 0,04  | 0,965147491 | -0,09 | 0,936876638 | -0,11 | 0,886422917 | -0,17 | 0,793839436 |
| Olfr603 | -0,05 | 0,924198601 | 0,09  | 0,910184435 | -0,04 | 0,956570063 | 0,04  | 0,941644811 | 0,06  | 0,958856121 |
| Olfr605 | 0,09  | 0,908281692 | 0,13  | 0,84786877  | 0     | 0,999931921 | -0,16 | 0,717052556 | -0,17 | 0,765809384 |
| Olfr606 | 0,14  | 0,784951771 | -0,22 | 0,58591598  | 0,18  | 0,783424344 | 0,07  | 0,858956727 | -0,04 | 0,958259949 |

|         |       |             |       |             |       |             |       |             |       |             |
|---------|-------|-------------|-------|-------------|-------|-------------|-------|-------------|-------|-------------|
| Olfr607 | 0,05  | 0,922118639 | -0,11 | 0,836605146 | -0,2  | 0,770526999 | -0,12 | 0,75786902  | -0,17 | 0,810820885 |
| Olfr608 | -0,11 | 0,790497738 | 0,23  | 0,66616142  | -0,29 | 0,557199733 | -0,16 | 0,614061499 | -0,3  | 0,568291477 |
| Olfr609 | -0,09 | 0,845591898 | 0,01  | 0,984121306 | -0,08 | 0,887782273 | 0     | 0,999793787 | 0,19  | 0,769038588 |
| Olfr61  | 0,32  | 0,492894586 | 0,57  | 0,695689103 | 0,04  | 0,973006385 | 0,23  | 0,56514466  | -0,16 | 0,784375319 |
| Olfr610 | -0,15 | 0,815987257 | 0,06  | 0,919762719 | -0,1  | 0,880706627 | -0,17 | 0,776545078 | -0,03 | 0,982175252 |
| Olfr611 | 0,07  | 0,903817676 | -0,26 | 0,782652703 | 0,11  | 0,849342965 | -0,06 | 0,925108476 | -0,07 | 0,939930189 |
| Olfr612 | -0,06 | 0,948926586 | -0,1  | 0,857503073 | -0,21 | 0,807786405 | 0,17  | 0,674665764 | -0,19 | 0,726042963 |
| Olfr613 | -0,13 | 0,856984761 | -0,11 | 0,826075471 | 0,09  | 0,938771378 | -0,21 | 0,6876055   | 0,06  | 0,953297732 |
| Olfr615 | 0,15  | 0,785268526 | 0,07  | 0,882589938 | -0,29 | 0,64759465  | -0,11 | 0,779547737 | -0,12 | 0,864540232 |
| Olfr616 | -0,03 | 0,960254479 | -0,04 | 0,959685428 | -0,17 | 0,801755243 | -0,2  | 0,620300633 | -0,3  | 0,611125057 |
| Olfr617 | 0,25  | 0,753900874 | 0,24  | 0,620236896 | -0,47 | 0,393731143 | -0,61 | 0,236654685 | -0,15 | 0,889342603 |
| Olfr618 | 0,13  | 0,778869381 | 0     | 1           | 0,04  | 0,964503796 | -0,08 | 0,904746777 | -0,12 | 0,910301996 |
| Olfr619 | -0,15 | 0,735697265 | 0,17  | 0,725783826 | -0,03 | 0,968067891 | -0,03 | 0,946369406 | -0,26 | 0,68987325  |
| Olfr62  | 0,14  | 0,835016158 | 0,07  | 0,88899358  | -0,04 | 0,967930981 | 0,08  | 0,873610553 | -0,13 | 0,845218636 |
| Olfr620 | -0,07 | 0,934482351 | 0,16  | 0,747707816 | -0,08 | 0,926182797 | -0,05 | 0,907539958 | -0,15 | 0,848955614 |
| Olfr622 | 0,4   | 0,505659923 | 0,38  | 0,35496087  | 0,07  | 0,939684708 | -0,05 | 0,912193677 | -0,13 | 0,894623317 |
| Olfr623 | -0,11 | 0,864746698 | 0,19  | 0,808842286 | -0,31 | 0,602259493 | 0,01  | 0,985756322 | -0,05 | 0,952296554 |
| Olfr624 | 0,13  | 0,790449291 | 0,02  | 0,962016762 | -0,13 | 0,841563482 | 0     | 1           | -0,18 | 0,768818896 |
| Olfr629 | 0,17  | 0,680389462 | -0,16 | 0,776122357 | -0,14 | 0,775478253 | 0,01  | 0,988205241 | 0,35  | 0,587735967 |
| Olfr63  | 0,22  | 0,712165686 | -0,2  | 0,7219659   | 0,05  | 0,942112992 | 0,24  | 0,618453093 | 0     | 0,99753219  |
| Olfr630 | -0,01 | 0,991355745 | 0,18  | 0,782652703 | 0,12  | 0,882022653 | 0,03  | 0,953420981 | 0,02  | 0,980306863 |
| Olfr631 | 0,1   | 0,941218573 | 0,28  | 0,812432185 | -0,35 | 0,709814408 | -0,16 | 0,875508638 | 0,38  | 0,656187572 |
| Olfr632 | 0,19  | 0,754653765 | -0,21 | 0,785573503 | 0,08  | 0,922971065 | 0,04  | 0,930692024 | -0,1  | 0,917710291 |
| Olfr633 | 0,21  | 0,620361515 | 0     | 0,999395995 | -0,16 | 0,777417583 | 0,02  | 0,967866794 | 0,1   | 0,92084425  |
| Olfr635 | 0,06  | 0,942440481 | 0,02  | 0,986591472 | -0,08 | 0,898935616 | -0,02 | 0,970771707 | -0,19 | 0,794611826 |
| Olfr638 | 0,14  | 0,889013209 | -0,16 | 0,792112243 | 0,31  | 0,734556263 | -0,27 | 0,780675133 | -0,28 | 0,754511071 |
| Olfr639 | -0,01 | 0,986831213 | -0,05 | 0,918058282 | -0,06 | 0,936840991 | 0,04  | 0,932633294 | -0,04 | 0,960065122 |
| Olfr64  | 0,32  | 0,447271895 | 0,04  | 0,970832543 | -0,15 | 0,845321518 | -0,19 | 0,586887461 | -0,09 | 0,90813354  |
| Olfr640 | 0,28  | 0,613990129 | 0,22  | 0,702517334 | -0,32 | 0,453294355 | -0,12 | 0,807661309 | 0,16  | 0,836061657 |
| Olfr641 | -0,07 | 0,892559851 | -0,14 | 0,738762579 | -0,13 | 0,856046789 | 0,23  | 0,499564387 | 0,27  | 0,601753447 |
| Olfr642 | 0,22  | 0,708296676 | -0,23 | 0,774089094 | 0,67  | 0,391435997 | 0,1   | 0,841707456 | -0,33 | 0,605619231 |
| Olfr643 | -0,33 | 0,625573018 | 0,12  | 0,932292974 | -0,51 | 0,398947243 | -0,03 | 0,944456192 | -0,13 | 0,887815327 |
| Olfr644 | 0,06  | 0,955321816 | -0,17 | 0,875220537 | 0,03  | 0,985347628 | -0,06 | 0,914931176 | 0,02  | 0,983514531 |
| Olfr645 | 0,04  | 0,962660554 | -0,1  | 0,900397409 | -0,09 | 0,89935302  | -0,18 | 0,758772982 | -0,29 | 0,702558142 |
| Olfr646 | -0,22 | 0,593540946 | -0,21 | 0,730536814 | -0,11 | 0,880622107 | -0,04 | 0,947936692 | -0,2  | 0,803732051 |



|         |       |             |       |             |       |             |       |             |       |             |
|---------|-------|-------------|-------|-------------|-------|-------------|-------|-------------|-------|-------------|
| Olfr648 | 0,03  | 0,964272364 | 0,1   | 0,896003756 | -0,21 | 0,682309944 | -0,04 | 0,933936816 | -0,22 | 0,808727809 |
| Olfr649 | 0,05  | 0,932059519 | -0,2  | 0,831045229 | -0,17 | 0,823823322 | 0,64  | 0,315848249 | 0,07  | 0,939448119 |
| Olfr65  | -0,04 | 0,959774806 | 0,37  | 0,520549244 | -0,1  | 0,900347352 | -0,13 | 0,814570338 | 0,13  | 0,887815327 |
| Olfr651 | -0,25 | 0,757032046 | -0,2  | 0,778496491 | -0,55 | 0,447140999 | -0,23 | 0,826514407 | -0,02 | 0,989183416 |
| Olfr652 | 0,08  | 0,903817676 | -0,42 | 0,355265179 | -0,11 | 0,922971065 | -0,11 | 0,888224268 | -0,15 | 0,901886776 |
| Olfr653 | -0,12 | 0,878097545 | -0,01 | 0,985764487 | -0,48 | 0,347987056 | 0,05  | 0,920094781 | 0,11  | 0,879075155 |
| Olfr654 | 0,02  | 0,969734432 | -0,16 | 0,743522861 | -0,17 | 0,771652975 | 0,05  | 0,91199183  | 0,2   | 0,758052028 |
| Olfr655 | 0,04  | 0,964378908 | 0,16  | 0,782652703 | -0,53 | 0,225514917 | -0,27 | 0,466105465 | -0,27 | 0,613018522 |
| Olfr656 | -0,04 | 0,958046663 | -0,14 | 0,817110093 | -0,23 | 0,804910036 | 0,37  | 0,632710762 | 0,15  | 0,922921816 |
| Olfr657 | 0,18  | 0,835208982 | -0,03 | 0,952099316 | -0,19 | 0,747847718 | 0,03  | 0,952409831 | -0,03 | 0,973428839 |
| Olfr658 | -0,19 | 0,701391957 | 0,26  | 0,732847182 | -0,46 | 0,419537272 | -0,22 | 0,603611964 | -0,04 | 0,975441362 |
| Olfr659 | -0,05 | 0,909885273 | -0,06 | 0,910193022 | 0,23  | 0,670137495 | 0,04  | 0,930705344 | 0,06  | 0,940803355 |
| Olfr66  | 0,11  | 0,869565514 | -0,02 | 0,975427696 | 0,05  | 0,940068173 | -0,26 | 0,521206029 | 0     | 0,994796912 |
| Olfr661 | 0     | 0,996210327 | 0,05  | 0,92585897  | -0,17 | 0,744243675 | 0,25  | 0,534052725 | -0,04 | 0,961845505 |
| Olfr663 | 0,7   | 0,493192804 | -0,16 | 0,813516293 | -0,13 | 0,811779267 | -0,21 | 0,684247831 | -0,12 | 0,864373858 |
| Olfr665 | 0,1   | 0,869225685 | -0,18 | 0,817056576 | 0,18  | 0,725191296 | 0,17  | 0,665234661 | -0,05 | 0,959573673 |
| Olfr666 | 0,03  | 0,964358894 | -0,09 | 0,936792848 | -0,47 | 0,339409729 | -0,02 | 0,96648085  | 0,03  | 0,980945466 |
| Olfr667 | 0,06  | 0,907523265 | -0,26 | 0,550164999 | 0,12  | 0,865917495 | 0,28  | 0,62296101  | -0,25 | 0,738260196 |
| Olfr668 | -0,12 | 0,820023436 | -0,19 | 0,716732926 | -0,5  | 0,243231098 | 0,36  | 0,290774064 | -0,3  | 0,679932345 |
| Olfr669 | 0,27  | 0,550911539 | 0,06  | 0,954948291 | -0,22 | 0,683168788 | -0,19 | 0,737710335 | 0,01  | 0,98653183  |
| Olfr67  | 0,15  | 0,768809729 | 0,02  | 0,986782918 | -0,03 | 0,973006385 | 0,06  | 0,942032046 | -0,02 | 0,98847659  |
| Olfr670 | 0,11  | 0,843661553 | -0,1  | 0,828219939 | -0,05 | 0,950846671 | -0,11 | 0,835275061 | -0,09 | 0,916173996 |
| Olfr671 | -0,05 | 0,91960004  | 0,03  | 0,965796793 | -0,14 | 0,811424918 | 0,26  | 0,485555968 | 0,23  | 0,722192968 |
| Olfr672 | 0,12  | 0,869565514 | 0,12  | 0,90781211  | 0,04  | 0,960492934 | -0,06 | 0,93808802  | 0     | 0,997106233 |
| Olfr675 | 0,06  | 0,948926586 | 0,07  | 0,946599376 | -0,08 | 0,910060392 | 0,2   | 0,664457643 | -0,09 | 0,916173996 |
| Olfr676 | -0,04 | 0,965703244 | -0,12 | 0,800393331 | 0,07  | 0,940335002 | 0,16  | 0,678790333 | 0,19  | 0,789659931 |
| Olfr677 | -0,06 | 0,895871179 | 0,4   | 0,524518705 | 0,01  | 0,993686224 | -0,25 | 0,518760069 | -0,07 | 0,939448119 |
| Olfr678 | 0,12  | 0,814269237 | -0,34 | 0,457010827 | -0,27 | 0,602259493 | 0,02  | 0,962652083 | 0,02  | 0,984065984 |
| Olfr679 | 0,08  | 0,904043614 | 0,01  | 0,990380046 | -0,3  | 0,601604534 | 0,11  | 0,762491811 | 0     | 0,999733463 |
| Olfr68  | -0,02 | 0,975469067 | -0,3  | 0,565456041 | -0,01 | 0,995401448 | -0,02 | 0,963694658 | -0,36 | 0,545166604 |
| Olfr681 | 0     | 0,996219097 | 0,16  | 0,824372931 | -0,16 | 0,841563482 | -0,14 | 0,71158821  | -0,12 | 0,88131673  |
| Olfr683 | 0,19  | 0,619738681 | 0,16  | 0,826862641 | -0,1  | 0,848462153 | 0,09  | 0,818849811 | 0,17  | 0,831543211 |
| Olfr684 | -0,18 | 0,714662474 | 0,21  | 0,698886888 | -0,14 | 0,776071062 | 0,04  | 0,928002892 | 0,39  | 0,525018839 |
| Olfr685 | 0,47  | 0,471408054 | -0,17 | 0,672620723 | -0,44 | 0,431861347 | 0,43  | 0,443653971 | -0,29 | 0,719609866 |
| Olfr686 | 0,34  | 0,491833357 | -0,25 | 0,807100558 | 0,01  | 0,997581017 | 0,51  | 0,386985509 | 0,3   | 0,784146537 |

|         |       |             |       |             |       |             |       |             |       |             |
|---------|-------|-------------|-------|-------------|-------|-------------|-------|-------------|-------|-------------|
| Olfr688 | 0,41  | 0,52546668  | 0,01  | 0,990052916 | 0,4   | 0,413987301 | 0,13  | 0,856184745 | -0,11 | 0,91339829  |
| Olfr689 | 0,28  | 0,476447186 | -0,3  | 0,753679288 | -0,02 | 0,986602451 | 0     | 0,999793787 | -0,13 | 0,840515079 |
| Olfr69  | 0,09  | 0,914090929 | -0,05 | 0,918041124 | -0,07 | 0,908390194 | 0,07  | 0,899335603 | 0,02  | 0,984125319 |
| Olfr690 | -0,08 | 0,891955146 | -0,19 | 0,656542439 | -0,22 | 0,757306958 | 0,34  | 0,600327117 | 0,05  | 0,973428839 |
| Olfr691 | 0,01  | 0,992748202 | 0,1   | 0,849047797 | 0,14  | 0,829543101 | -0,03 | 0,948439323 | 0,23  | 0,711096219 |
| Olfr692 | 0,14  | 0,784114109 | 0,12  | 0,804868131 | -0,16 | 0,813110365 | 0,11  | 0,845785501 | 0,2   | 0,758052028 |
| Olfr693 | 0,16  | 0,770273483 | 0,04  | 0,940046211 | 0,22  | 0,72132637  | -0,03 | 0,940339718 | -0,19 | 0,765419939 |
| Olfr694 | -0,03 | 0,973083901 | -0,04 | 0,945374636 | -0,13 | 0,823823322 | -0,06 | 0,88524189  | -0,1  | 0,899279837 |
| Olfr695 | 0,67  | 0,465440464 | 0,27  | 0,659928401 | -0,25 | 0,665818173 | -0,4  | 0,36361031  | -0,45 | 0,456564217 |
| Olfr697 | -0,01 | 0,990404752 | 0,05  | 0,932338539 | -0,21 | 0,737241227 | -0,02 | 0,9795639   | -0,03 | 0,982175252 |
| Olfr698 | 0,09  | 0,874688734 | 0,08  | 0,924894657 | -0,41 | 0,541560473 | 0,02  | 0,977176942 | 0,41  | 0,608004947 |
| Olfr699 | 0,03  | 0,95491769  | -0,25 | 0,61193546  | -0,28 | 0,59480175  | 0,07  | 0,909976349 | -0,13 | 0,872367819 |
| Olfr70  | 0,09  | 0,829838991 | 0,06  | 0,947684955 | -0,27 | 0,673901033 | -0,09 | 0,831133242 | -0,13 | 0,852757557 |
| Olfr700 | -0,01 | 0,991919022 | 0,28  | 0,720902851 | -0,28 | 0,691009366 | -0,15 | 0,835784868 | 0,31  | 0,709010136 |
| Olfr701 | 0,45  | 0,627641756 | 0,07  | 0,958856577 | -0,1  | 0,940213182 | -0,4  | 0,577799811 | 0,3   | 0,621013004 |
| Olfr702 | -0,61 | 0,17475641  | -0,06 | 0,938638797 | -0,01 | 0,990836784 | 0,21  | 0,623649597 | 0,08  | 0,939930189 |
| Olfr703 | 0,3   | 0,578154278 | -0,05 | 0,932292974 | -0,14 | 0,862480223 | 0,07  | 0,864379203 | 0,04  | 0,962525821 |
| Olfr704 | 0,16  | 0,683531628 | -0,04 | 0,931100468 | -0,02 | 0,984778342 | 0,03  | 0,950597099 | 0,02  | 0,980945466 |
| Olfr705 | 0     | 0,997266885 | 0,05  | 0,964757836 | 0,07  | 0,921956183 | -0,02 | 0,958927    | 0,11  | 0,927296036 |
| Olfr706 | 0,09  | 0,936985169 | 0,05  | 0,956049982 | -0,15 | 0,885599187 | 0,35  | 0,474127813 | -0,09 | 0,947559952 |
| Olfr707 | 0,11  | 0,832947001 | 0,08  | 0,887493001 | -0,14 | 0,861307315 | -0,06 | 0,886903189 | -0,25 | 0,615772692 |
| Olfr71  | -0,04 | 0,95538722  | -0,04 | 0,940111449 | 0,15  | 0,843623661 | -0,05 | 0,902706786 | 0,14  | 0,818974537 |
| Olfr710 | 0,13  | 0,822107047 | 0,04  | 0,95419895  | -0,24 | 0,579810168 | -0,25 | 0,422312369 | -0,32 | 0,536721752 |
| Olfr711 | 0,26  | 0,754187607 | 0,05  | 0,980849103 | 0,1   | 0,879610849 | -0,2  | 0,815125587 | -0,36 | 0,585244465 |
| Olfr713 | 0,36  | 0,613990129 | 0,11  | 0,839789639 | -0,09 | 0,906709737 | -0,28 | 0,679243757 | -0,19 | 0,858119548 |
| Olfr714 | 0,17  | 0,727387897 | 0,25  | 0,738810128 | 0,01  | 0,993379272 | -0,32 | 0,502761838 | -0,39 | 0,514506628 |
| Olfr715 | -0,02 | 0,96869339  | -0,15 | 0,786405071 | 0,02  | 0,980447951 | -0,05 | 0,911958998 | -0,15 | 0,833124162 |
| Olfr716 | 0,16  | 0,787452068 | -0,36 | 0,528626602 | -0,09 | 0,880706627 | 0,06  | 0,903127806 | -0,15 | 0,829615181 |
| Olfr720 | 0,45  | 0,386425394 | -0,04 | 0,934602811 | 0,12  | 0,850868333 | -0,07 | 0,931729923 | 0,17  | 0,867935119 |
| Olfr722 | 0,08  | 0,89763852  | -0,38 | 0,474277562 | -0,12 | 0,855320495 | 0,24  | 0,651867609 | 0,08  | 0,917075631 |
| Olfr723 | -0,31 | 0,645863119 | 0,22  | 0,859585789 | -0,55 | 0,242790302 | -0,25 | 0,844720784 | -0,09 | 0,968130547 |
| Olfr724 | -0,13 | 0,7914678   | -0,02 | 0,989521494 | -0,06 | 0,950846671 | 0,06  | 0,870331513 | 0,26  | 0,712793529 |
| Olfr725 | 0     | 0,999010996 | -0,37 | 0,550207979 | 0,11  | 0,856923247 | 0,2   | 0,742706747 | 0,14  | 0,843403563 |
| Olfr726 | -0,05 | 0,937251448 | -0,09 | 0,852781617 | -0,12 | 0,884979128 | 0     | 0,998526865 | 0,38  | 0,47159163  |
| Olfr727 | 0,02  | 0,976574175 | 0,2   | 0,714978558 | -0,25 | 0,659712518 | 0,05  | 0,948141338 | 0,23  | 0,765809384 |

|             |       |             |       |             |       |             |       |             |       |             |
|-------------|-------|-------------|-------|-------------|-------|-------------|-------|-------------|-------|-------------|
| Olfr728     | 0,09  | 0,84241758  | 0,03  | 0,961370411 | -0,27 | 0,595036513 | -0,07 | 0,894503389 | -0,06 | 0,948163009 |
| Olfr729     | -0,18 | 0,757032046 | 0,07  | 0,931001523 | -0,15 | 0,786116942 | -0,08 | 0,915053137 | 0,01  | 0,988103461 |
| Olfr73      | 0,1   | 0,839273617 | 0,4   | 0,561174006 | -0,21 | 0,660920525 | -0,29 | 0,364250425 | -0,19 | 0,794054354 |
| Olfr730     | -0,09 | 0,836344315 | -0,12 | 0,793603525 | 0,04  | 0,964150466 | -0,09 | 0,81848916  | 0,11  | 0,906660977 |
| Olfr731     | 0,08  | 0,909036289 | -0,01 | 0,9951682   | -0,35 | 0,634853366 | -0,05 | 0,913974287 | -0,02 | 0,982816728 |
| Olfr732     | 0,12  | 0,792313188 | 0,07  | 0,922649946 | -0,34 | 0,599127793 | 0,06  | 0,893641164 | 0,06  | 0,937446198 |
| Olfr733     | 0,01  | 0,989392216 | -0,13 | 0,869734155 | -0,33 | 0,552409541 | 0,16  | 0,75053823  | 0,53  | 0,498803884 |
| Olfr734     | 0,01  | 0,988431763 | -0,13 | 0,765705056 | 0,17  | 0,772829778 | -0,02 | 0,961377872 | -0,02 | 0,981062401 |
| Olfr735     | 0     | 0,998017023 | -0,03 | 0,971464245 | -0,09 | 0,916403684 | 0     | 1           | 0,11  | 0,913274952 |
| Olfr736     | 0,24  | 0,581573098 | -0,16 | 0,815022365 | -0,19 | 0,752784738 | 0,16  | 0,742706747 | 0,18  | 0,75103789  |
| Olfr738     | 0,14  | 0,837953479 | 0,09  | 0,832080652 | 0,09  | 0,882540073 | -0,03 | 0,944879756 | 0,1   | 0,894623317 |
| Olfr739     | -0,12 | 0,820023436 | 0,07  | 0,91395667  | -0,21 | 0,711051822 | -0,08 | 0,835215633 | -0,19 | 0,85041485  |
| Olfr74      | 0,16  | 0,704026555 | 0,14  | 0,760095572 | 0,1   | 0,854599398 | -0,13 | 0,729299699 | -0,02 | 0,982859799 |
| Olfr740     | -0,05 | 0,948291116 | 0,24  | 0,761820188 | -0,2  | 0,858999435 | 0,13  | 0,814029933 | 0,07  | 0,939448119 |
| Olfr741     | -0,1  | 0,893139498 | -0,29 | 0,68442935  | -0,11 | 0,941627748 | 0,71  | 0,405230202 | 0     | 0,999452483 |
| Olfr742     | 0,14  | 0,747663533 | 0,11  | 0,806959399 | -0,09 | 0,900945102 | -0,37 | 0,40199632  | 0,01  | 0,993785683 |
| Olfr743     | -0,03 | 0,968300298 | -0,16 | 0,764299173 | 0,05  | 0,953951069 | 0,2   | 0,797103214 | 0,35  | 0,645088339 |
| Olfr744     | -0,08 | 0,908569912 | 0,33  | 0,743881982 | 0,1   | 0,898684568 | -0,21 | 0,776054059 | 0,1   | 0,922921816 |
| Olfr745     | 0,18  | 0,80746414  | 0,12  | 0,940046211 | 0,22  | 0,681121299 | -0,06 | 0,921715471 | -0,18 | 0,811321326 |
| Olfr746     | -0,07 | 0,866720868 | 0,03  | 0,967932183 | 0     | 0,998479176 | 0,07  | 0,849520464 | -0,06 | 0,948163009 |
| Olfr747     | 0,31  | 0,46799262  | 0,01  | 0,992929085 | -0,16 | 0,83442082  | -0,08 | 0,832134224 | 0,11  | 0,917075631 |
| Olfr748     | -0,2  | 0,74764092  | 0,07  | 0,894400782 | -0,28 | 0,541138907 | -0,38 | 0,441739108 | -0,3  | 0,583535515 |
| Olfr749     | 0     | 0,996219097 | 0,08  | 0,931676012 | -0,02 | 0,980554608 | 0,14  | 0,749835708 | 0,28  | 0,738853855 |
| Olfr750     | -0,06 | 0,944291635 | -0,09 | 0,973945454 | 0,02  | 0,987208663 | 0,09  | 0,825899927 | 0,12  | 0,890744062 |
| Olfr75-ps1  | -0,5  | 0,617280733 | 0,51  | 0,574343122 | 0,13  | 0,936097567 | -0,05 | 0,959399629 | 0,29  | 0,763277172 |
| Olfr76      | -0,16 | 0,758721455 | -0,09 | 0,87892334  | 0,31  | 0,542398079 | 0,11  | 0,794613431 | -0,01 | 0,992406971 |
| Olfr761     | 0,33  | 0,618567097 | 0,08  | 0,930192503 | -0,2  | 0,80210446  | -0,28 | 0,471871858 | -0,01 | 0,993413582 |
| Olfr763     | -0,35 | 0,311022075 | 0,2   | 0,785153081 | 0,24  | 0,717856288 | -0,32 | 0,692059018 | -0,34 | 0,760587652 |
| Olfr764-ps1 | 0,01  | 0,996998625 | 0     | 0,999301525 | 0,18  | 0,720590502 | 0,44  | 0,229615981 | 0,12  | 0,889620489 |
| Olfr765     | 0,18  | 0,815219917 | -0,12 | 0,865420265 | -0,25 | 0,684455958 | 0,25  | 0,844112307 | 0,24  | 0,85155002  |
| Olfr766-ps1 | 0,18  | 0,803064624 | -0,35 | 0,465764098 | -0,77 | 0,38497941  | 0,04  | 0,962371269 | 0,41  | 0,582633868 |
| Olfr767     | -0,11 | 0,813201941 | 0,08  | 0,901352701 | -0,3  | 0,662451176 | 0,04  | 0,943082209 | 0,02  | 0,981030324 |
| Olfr768     | 0,08  | 0,897717279 | 0     | 0,998095127 | 0,01  | 0,989491273 | 0,09  | 0,86329094  | 0,09  | 0,931519966 |
| Olfr769     | 0,03  | 0,969577981 | 0,17  | 0,728434379 | -0,01 | 0,997220401 | -0,38 | 0,300618827 | -0,49 | 0,308256382 |
| Olfr77      | 0,06  | 0,911091943 | -0,1  | 0,831580851 | -0,29 | 0,684455958 | 0,15  | 0,680332477 | 0,24  | 0,699996356 |

|         |       |             |       |             |       |             |       |             |       |             |
|---------|-------|-------------|-------|-------------|-------|-------------|-------|-------------|-------|-------------|
| Olfr770 | 0,03  | 0,962254712 | -0,04 | 0,941609372 | 0     | 0,997942192 | 0,1   | 0,791048108 | 0,27  | 0,662790079 |
| Olfr771 | -0,26 | 0,597519827 | -0,07 | 0,881113709 | 0,06  | 0,925904075 | 0,4   | 0,281333312 | -0,11 | 0,859663155 |
| Olfr772 | -0,01 | 0,990894139 | 0,15  | 0,873628464 | -0,74 | 0,249821562 | -0,84 | 0,438028732 | -0,03 | 0,989470761 |
| Olfr773 | 0,26  | 0,676906193 | -0,11 | 0,920933203 | -0,18 | 0,777242951 | -0,15 | 0,792419274 | 0,11  | 0,927965151 |
| Olfr774 | 0,04  | 0,946792769 | -0,07 | 0,947107147 | 0,02  | 0,986390651 | 0,01  | 0,985865561 | 0,09  | 0,900126162 |
| Olfr775 | 0,49  | 0,325246268 | 0,35  | 0,667422905 | -0,35 | 0,591520086 | -0,24 | 0,719756575 | -0,29 | 0,695593525 |
| Olfr776 | 0     | 0,99919815  | 0,09  | 0,899110485 | -0,13 | 0,830541787 | -0,07 | 0,899384297 | 0,02  | 0,979338129 |
| Olfr777 | -0,17 | 0,70841898  | -0,2  | 0,752038109 | 0,03  | 0,968677508 | 0,11  | 0,797123056 | 0,01  | 0,985448733 |
| Olfr78  | 0,06  | 0,955554381 | 0,23  | 0,797648417 | -0,08 | 0,941627748 | -0,02 | 0,981610833 | -0,1  | 0,936120822 |
| Olfr780 | 0,03  | 0,964869618 | 0,05  | 0,929251192 | 0,08  | 0,905209657 | 0,16  | 0,65865291  | 0,06  | 0,937593816 |
| Olfr781 | -0,07 | 0,895400682 | -0,08 | 0,855632384 | -0,33 | 0,629718501 | -0,1  | 0,823314899 | -0,13 | 0,881943508 |
| Olfr782 | 0,07  | 0,904043614 | -0,08 | 0,901688898 | -0,32 | 0,561271294 | 0,13  | 0,731281458 | 0,03  | 0,973026298 |
| Olfr784 | -0,16 | 0,772937761 | -0,05 | 0,910184435 | -0,39 | 0,635949477 | -0,04 | 0,926898299 | 0,24  | 0,758052028 |
| Olfr786 | -0,09 | 0,849751597 | 0,06  | 0,896187678 | 0,14  | 0,892364621 | -0,06 | 0,894634041 | -0,22 | 0,765340194 |
| Olfr787 | 0,3   | 0,602160482 | 0,02  | 0,98845779  | 0,09  | 0,911634383 | 0,11  | 0,876439802 | 0,54  | 0,324093515 |
| Olfr788 | -0,03 | 0,956095057 | 0,19  | 0,765705056 | 0,04  | 0,956894731 | -0,18 | 0,712887618 | -0,27 | 0,732679577 |
| Olfr790 | 0,19  | 0,784558415 | 0,08  | 0,883145635 | -0,09 | 0,891500876 | -0,07 | 0,887406698 | 0,08  | 0,939607682 |
| Olfr791 | -0,23 | 0,706274249 | 0     | 1           | 0,01  | 0,991562229 | -0,05 | 0,904690757 | 0,03  | 0,97203071  |
| Olfr792 | 0,08  | 0,870052902 | -0,16 | 0,792086001 | -0,3  | 0,671222427 | 0,07  | 0,90038088  | 0,18  | 0,796713037 |
| Olfr794 | 0,08  | 0,875046718 | 0,27  | 0,696259711 | -0,21 | 0,670137495 | -0,05 | 0,920640884 | -0,22 | 0,752420653 |
| Olfr796 | 0,1   | 0,885095358 | -0,04 | 0,932292974 | -0,07 | 0,925245169 | 0,08  | 0,840657538 | 0,12  | 0,870379634 |
| Olfr798 | 0,09  | 0,86554415  | 0,07  | 0,880892852 | -0,08 | 0,908846892 | -0,14 | 0,748834688 | -0,06 | 0,946463658 |
| Olfr799 | 0,15  | 0,722220592 | -0,17 | 0,726214653 | 0,04  | 0,964509282 | 0,24  | 0,534953123 | 0,21  | 0,781777975 |
| Olfr8   | -0,15 | 0,764189777 | -0,03 | 0,972706967 | -0,13 | 0,881461218 | -0,2  | 0,765911385 | 0,08  | 0,952141995 |
| Olfr800 | 0,08  | 0,907419323 | 0,18  | 0,810418074 | -0,26 | 0,584463665 | -0,17 | 0,752208331 | 0,01  | 0,986971861 |
| Olfr801 | 0,04  | 0,966775766 | 0,06  | 0,911024505 | -0,25 | 0,616965903 | 0,03  | 0,94809223  | 0,01  | 0,991437885 |
| Olfr802 | 0,1   | 0,860432757 | -0,02 | 0,977480225 | 0,01  | 0,991568687 | -0,08 | 0,854613369 | -0,06 | 0,940438527 |
| Olfr803 | -0,48 | 0,433848441 | -0,28 | 0,664502462 | -0,23 | 0,638689491 | 0,18  | 0,599431454 | 0     | 0,999572304 |
| Olfr804 | -0,35 | 0,498560785 | 0,07  | 0,9381453   | -0,01 | 0,992919703 | -0,07 | 0,86018014  | -0,15 | 0,866285506 |
| Olfr805 | 0,08  | 0,883674476 | 0,07  | 0,896065393 | 0,01  | 0,991240121 | -0,12 | 0,743170266 | 0,07  | 0,926844526 |
| Olfr807 | 0,05  | 0,942710063 | 0,07  | 0,907235638 | -0,14 | 0,795689651 | -0,11 | 0,823795118 | -0,23 | 0,664273475 |
| Olfr808 | -0,2  | 0,642516435 | 0,09  | 0,864368418 | 0     | 0,998479656 | -0,11 | 0,855289071 | -0,36 | 0,555783555 |
| Olfr809 | -0,01 | 0,981937173 | -0,04 | 0,937551091 | 0,03  | 0,969992596 | -0,06 | 0,884584082 | -0,08 | 0,914498972 |
| Olfr810 | 0,03  | 0,972667767 | 0,07  | 0,926867017 | 0     | 0,997268369 | -0,01 | 0,986806659 | 0,26  | 0,675958562 |
| Olfr811 | 0,56  | 0,664456582 | -0,29 | 0,583200444 | 0,09  | 0,926982123 | -0,01 | 0,988205241 | 0,3   | 0,698795718 |

|             |       |             |       |             |       |             |       |             |       |             |
|-------------|-------|-------------|-------|-------------|-------|-------------|-------|-------------|-------|-------------|
| Olfr812     | 0,09  | 0,895870455 | 0,22  | 0,703255839 | -0,12 | 0,840657513 | -0,22 | 0,499833886 | 0,01  | 0,985982505 |
| Olfr813     | -0,11 | 0,784951771 | 0,06  | 0,894167102 | -0,2  | 0,700433004 | 0,14  | 0,709465672 | 0,18  | 0,752321406 |
| Olfr814     | 0,14  | 0,800851935 | -0,38 | 0,334779323 | 0,05  | 0,942150325 | 0,2   | 0,600412927 | 0,16  | 0,823098095 |
| Olfr815     | -0,01 | 0,981412917 | 0,03  | 0,954343854 | -0,11 | 0,857466061 | -0,17 | 0,743156626 | -0,36 | 0,617249007 |
| Olfr816     | -0,14 | 0,801833962 | 0,09  | 0,855822577 | -0,26 | 0,712697139 | 0,04  | 0,932800758 | 0,15  | 0,830813323 |
| Olfr818     | 0,4   | 0,455001921 | 0,14  | 0,864680059 | 0,33  | 0,549446867 | -0,06 | 0,877391482 | 0,43  | 0,574285481 |
| Olfr819     | 0,11  | 0,782709989 | 0,17  | 0,781665479 | -0,2  | 0,68989337  | -0,03 | 0,947809027 | 0,07  | 0,926008345 |
| Olfr820     | -0,31 | 0,836838966 | -0,5  | 0,823922494 | 0,18  | 0,922318683 | 0,71  | 0,389207462 | 0,74  | 0,326309536 |
| Olfr821     | -0,05 | 0,932671813 | 0,03  | 0,970020205 | -0,33 | 0,598063616 | 0     | 0,998710655 | 0,01  | 0,991980521 |
| Olfr822     | 0,08  | 0,909477787 | -0,22 | 0,727238755 | -0,33 | 0,471873683 | 0,2   | 0,726463293 | 0,03  | 0,979392852 |
| Olfr823     | 0,23  | 0,680520303 | 0,11  | 0,887211146 | -0,04 | 0,950631796 | -0,03 | 0,945619692 | -0,19 | 0,864415219 |
| Olfr824     | -0,04 | 0,953740954 | 0,02  | 0,977204386 | -0,16 | 0,830336321 | 0,02  | 0,972627967 | 0,04  | 0,961406182 |
| Olfr825     | -0,09 | 0,91366065  | -0,08 | 0,938711163 | -0,44 | 0,549066389 | -0,01 | 0,989790023 | -0,52 | 0,450543672 |
| Olfr826     | 0,07  | 0,875711103 | -0,07 | 0,870590313 | 0     | 0,999571656 | 0,03  | 0,953429313 | 0,02  | 0,979341305 |
| Olfr827     | 0,16  | 0,681371768 | 0,01  | 0,991131565 | -0,1  | 0,884898822 | -0,01 | 0,978105083 | 0,06  | 0,940438527 |
| Olfr828     | 0,14  | 0,760032001 | 0     | 1           | -0,01 | 0,996260936 | 0,03  | 0,943082209 | 0     | 0,994021838 |
| Olfr829     | 0,1   | 0,816710776 | 0,03  | 0,957659362 | -0,01 | 0,990836784 | -0,07 | 0,855041248 | -0,07 | 0,920887308 |
| Olfr830     | 0,67  | 0,38528369  | 0,24  | 0,694017753 | -0,05 | 0,94178334  | -0,19 | 0,740434535 | -0,11 | 0,921349205 |
| Olfr832     | -0,21 | 0,603330883 | -0,13 | 0,787285346 | 0,01  | 0,991168026 | -0,17 | 0,717763363 | 0,14  | 0,885318142 |
| Olfr834     | 0,04  | 0,947630317 | 0,17  | 0,791442364 | -0,05 | 0,949243931 | -0,07 | 0,87811903  | 0,17  | 0,795033998 |
| Olfr835     | 0,05  | 0,922118639 | 0,12  | 0,771898108 | -0,01 | 0,996265665 | -0,11 | 0,761678668 | -0,09 | 0,925858284 |
| Olfr836     | 0,05  | 0,937415031 | 0,04  | 0,950418256 | 0,11  | 0,834017354 | -0,03 | 0,941483354 | 0,2   | 0,822628064 |
| Olfr837     | 0,2   | 0,673291416 | 0,06  | 0,947664606 | -0,17 | 0,800150738 | 0,19  | 0,593103523 | 0,07  | 0,94034344  |
| Olfr843     | -0,21 | 0,706900702 | 0     | 0,999395995 | 0,2   | 0,727879469 | 0,13  | 0,82679937  | -0,09 | 0,905753594 |
| Olfr845     | -0,09 | 0,853867512 | 0,1   | 0,824372931 | -0,21 | 0,737821076 | -0,02 | 0,96875256  | 0,11  | 0,886027227 |
| Olfr846     | 0,08  | 0,869225685 | 0,04  | 0,932292974 | -0,17 | 0,770526999 | 0,05  | 0,895383945 | 0,16  | 0,791694696 |
| Olfr847     | 0,3   | 0,540951867 | 0,13  | 0,837489456 | -0,06 | 0,938771378 | -0,22 | 0,691668858 | -0,11 | 0,870615718 |
| Olfr849     | 0,04  | 0,944759048 | -0,14 | 0,768342508 | -0,27 | 0,560830769 | 0     | 1           | -0,07 | 0,920355527 |
| Olfr850     | 0,17  | 0,785669218 | -0,06 | 0,900801202 | -0,08 | 0,890405742 | 0,06  | 0,911253055 | -0,08 | 0,927536545 |
| Olfr851     | 0,2   | 0,662416763 | 0,16  | 0,827289479 | 0,04  | 0,962766843 | -0,09 | 0,874701048 | -0,09 | 0,913274952 |
| Olfr853     | 0,11  | 0,889978058 | -0,08 | 0,891627071 | 0,05  | 0,944791988 | -0,16 | 0,720743596 | -0,22 | 0,724669859 |
| Olfr854     | 0,35  | 0,502600185 | 0,13  | 0,827496723 | -0,11 | 0,894229514 | 0,21  | 0,665234661 | 0,09  | 0,916204519 |
| Olfr855     | 0     | 0,996998625 | -0,05 | 0,934602811 | -0,02 | 0,983917018 | -0,05 | 0,957674095 | -0,09 | 0,927536545 |
| Olfr856-ps1 | 0,33  | 0,534265938 | -0,01 | 0,985148348 | -0,8  | 0,337509636 | 0,02  | 0,982212444 | 0,32  | 0,692943341 |
| Olfr857     | 0,29  | 0,460231397 | -0,01 | 0,992175086 | 0,03  | 0,970192376 | 0,16  | 0,672111    | 0,06  | 0,945776926 |

|         |       |             |       |             |       |             |       |             |       |             |
|---------|-------|-------------|-------|-------------|-------|-------------|-------|-------------|-------|-------------|
| Olfr859 | 0,4   | 0,385512506 | 0,14  | 0,786394409 | -0,11 | 0,855029069 | -0,15 | 0,703627304 | 0,11  | 0,879075155 |
| Olfr860 | 0,02  | 0,98297164  | 0,09  | 0,855607772 | -0,16 | 0,761192631 | -0,21 | 0,510589408 | -0,18 | 0,772539008 |
| Olfr862 | -0,04 | 0,948926586 | 0     | 1           | 0,31  | 0,469053827 | -0,1  | 0,87071965  | -0,23 | 0,765340194 |
| Olfr866 | 0,02  | 0,976920494 | -0,02 | 0,982053677 | 0,21  | 0,720069267 | 0,06  | 0,917849121 | -0,04 | 0,96923842  |
| Olfr867 | 0,02  | 0,970938013 | 0,02  | 0,973043968 | -0,04 | 0,958424603 | 0,1   | 0,813711032 | -0,11 | 0,889106241 |
| Olfr868 | 0,37  | 0,407540758 | -0,07 | 0,89034555  | -0,06 | 0,943144399 | 0,15  | 0,736423588 | 0,09  | 0,918865935 |
| Olfr869 | 0     | 0,999042849 | -0,2  | 0,720902851 | 0,03  | 0,979791644 | 0,05  | 0,922691243 | -0,18 | 0,827032122 |
| Olfr870 | 0,16  | 0,7761658   | -0,25 | 0,699782231 | -0,14 | 0,894339966 | 0,47  | 0,323830449 | 0,09  | 0,925858284 |
| Olfr871 | 0,08  | 0,882500171 | 0,15  | 0,793603525 | -0,18 | 0,7347175   | -0,03 | 0,95674243  | 0,04  | 0,96386471  |
| Olfr872 | 0,03  | 0,964358894 | 0,05  | 0,955345839 | -0,04 | 0,952366216 | -0,24 | 0,680497621 | -0,28 | 0,668747774 |
| Olfr873 | 0,28  | 0,575829311 | 0,07  | 0,89034555  | -0,15 | 0,775163644 | -0,05 | 0,912307827 | 0,03  | 0,969617491 |
| Olfr874 | 0,07  | 0,914383847 | 0,11  | 0,816543137 | 0     | 0,998425248 | 0,01  | 0,986383348 | -0,04 | 0,959592518 |
| Olfr875 | 0,19  | 0,802029256 | -0,08 | 0,853569707 | 0,23  | 0,681398968 | 0,05  | 0,922458485 | -0,06 | 0,944318268 |
| Olfr876 | 0,14  | 0,810101389 | -0,45 | 0,583200444 | -0,34 | 0,53405345  | -0,08 | 0,886769103 | 0,09  | 0,915395762 |
| Olfr877 | 0,14  | 0,839824168 | 0,02  | 0,97407904  | 0,03  | 0,971222784 | 0     | 1           | 0,09  | 0,905581898 |
| Olfr878 | 0,02  | 0,975949545 | 0     | 0,999661053 | -0,15 | 0,816374369 | 0,12  | 0,799552734 | 0     | 0,999572304 |
| Olfr881 | 0,06  | 0,901357435 | -0,12 | 0,800067055 | -0,18 | 0,77115153  | 0     | 1           | -0,13 | 0,853041033 |
| Olfr883 | -0,14 | 0,72886117  | 0,02  | 0,968437059 | 0,01  | 0,993379272 | 0,04  | 0,921731995 | 0,04  | 0,962959172 |
| Olfr884 | -0,03 | 0,961694454 | 0,04  | 0,934280572 | -0,31 | 0,534543192 | 0,04  | 0,927360713 | 0,12  | 0,892547331 |
| Olfr885 | 0,1   | 0,822107047 | 0,02  | 0,966705367 | -0,26 | 0,622546805 | -0,01 | 0,985580087 | 0,52  | 0,277249043 |
| Olfr887 | -0,29 | 0,584231725 | 0,1   | 0,826290896 | -0,02 | 0,992510518 | 0,85  | 0,119127648 | 0,09  | 0,912594881 |
| Olfr888 | 0,22  | 0,579444251 | 0,05  | 0,923044405 | 0,16  | 0,848462153 | -0,04 | 0,919062567 | 0,14  | 0,861977667 |
| Olfr889 | -0,08 | 0,882500171 | 0     | 0,999692079 | -0,19 | 0,723002297 | -0,01 | 0,983014334 | -0,15 | 0,834568565 |
| Olfr890 | 0,1   | 0,897717279 | -0,19 | 0,752038109 | -0,12 | 0,846689137 | 0,17  | 0,671991774 | 0,11  | 0,888252054 |
| Olfr891 | 0,25  | 0,588750251 | 0,18  | 0,711176844 | -0,12 | 0,848370099 | -0,14 | 0,755185628 | -0,05 | 0,954657649 |
| Olfr893 | 0,05  | 0,956452501 | 0,01  | 0,997700959 | -0,01 | 0,989491273 | -0,09 | 0,881334406 | 0,05  | 0,969617491 |
| Olfr894 | 0,06  | 0,900062452 | -0,1  | 0,926810709 | 0,46  | 0,764671707 | -0,14 | 0,876247018 | 0,17  | 0,916837154 |
| Olfr895 | -0,21 | 0,640414995 | -0,42 | 0,635735492 | -0,06 | 0,953629902 | 0,04  | 0,951642236 | -0,22 | 0,698177269 |
| Olfr898 | 0,29  | 0,498330333 | 0,1   | 0,852346938 | 0,04  | 0,951601163 | -0,11 | 0,80718406  | 0,04  | 0,972590168 |
| Olfr9   | 0,34  | 0,576555049 | 0,95  | 0,147949735 | -0,36 | 0,43825018  | -0,07 | 0,923775458 | 0,89  | 0,065364474 |
| Olfr90  | 0,03  | 0,970286316 | -0,35 | 0,569612894 | 0,01  | 0,99255889  | 0,13  | 0,739149218 | 0,1   | 0,887859063 |
| Olfr901 | 0,26  | 0,588952682 | -0,04 | 0,952293161 | -0,04 | 0,953975807 | -0,16 | 0,675160655 | 0,07  | 0,937267078 |
| Olfr902 | -0,2  | 0,724976228 | 0,2   | 0,745130453 | -0,05 | 0,946777487 | -0,48 | 0,365687993 | -0,68 | 0,340689459 |
| Olfr904 | 0,01  | 0,995682915 | 0,2   | 0,748874675 | 0,09  | 0,906097666 | 0,17  | 0,698762924 | 0,28  | 0,702993783 |
| Olfr905 | 0,14  | 0,716985606 | 0,05  | 0,918694468 | -0,15 | 0,800150738 | 0,2   | 0,699348716 | 0,27  | 0,716229308 |

|             |       |             |       |             |       |             |       |             |       |             |
|-------------|-------|-------------|-------|-------------|-------|-------------|-------|-------------|-------|-------------|
| Olfr906     | 0,03  | 0,965991176 | 0     | 1           | 0,12  | 0,841143044 | 0,05  | 0,904971257 | 0,04  | 0,959398085 |
| Olfr907     | 0,47  | 0,560461791 | -0,03 | 0,954024651 | -0,11 | 0,887446966 | -0,04 | 0,969947483 | -0,16 | 0,890039506 |
| Olfr908     | 0,2   | 0,645057952 | -0,03 | 0,961333446 | -0,09 | 0,903366838 | -0,19 | 0,765492742 | 0     | 0,998424441 |
| Olfr91      | 0,26  | 0,49976831  | -0,01 | 0,994486533 | 0,06  | 0,930069312 | 0,4   | 0,599910447 | 0,13  | 0,859615999 |
| Olfr910     | 0,16  | 0,705209842 | 0,04  | 0,940507154 | -0,03 | 0,967304745 | 0     | 0,994376209 | -0,04 | 0,97203071  |
| Olfr911-ps1 | 0,14  | 0,764288636 | 0,02  | 0,966783327 | -0,03 | 0,963195558 | 0,02  | 0,9704566   | -0,05 | 0,959573673 |
| Olfr912     | 0,34  | 0,701627731 | 0,04  | 0,954307545 | -0,1  | 0,899614877 | -0,5  | 0,292193253 | 0     | 0,999572304 |
| Olfr913     | 0,13  | 0,821541936 | 0,26  | 0,663652994 | -0,05 | 0,940276719 | 0,05  | 0,932800758 | -0,03 | 0,975441362 |
| Olfr914     | 0,19  | 0,775068941 | 0,35  | 0,497312937 | 0,07  | 0,947847915 | 0,04  | 0,963343418 | -0,07 | 0,958856121 |
| Olfr915     | 0,13  | 0,781198759 | 0,13  | 0,806715517 | 0,06  | 0,926237505 | 0,16  | 0,66492958  | 0,06  | 0,947559952 |
| Olfr916     | -0,03 | 0,971922167 | 0,22  | 0,655302559 | -0,08 | 0,911634383 | -0,22 | 0,687151118 | -0,05 | 0,965707187 |
| Olfr917     | 0,19  | 0,724538829 | -0,06 | 0,932292974 | -0,28 | 0,619460234 | 0,19  | 0,604464705 | 0,05  | 0,954657649 |
| Olfr918     | 0,21  | 0,640223012 | -0,33 | 0,535948571 | 0,12  | 0,868409802 | 0,1   | 0,794368434 | -0,23 | 0,75081995  |
| Olfr919     | -0,15 | 0,827974901 | 0,23  | 0,627230934 | 0     | 0,997220401 | -0,28 | 0,535443302 | -0,14 | 0,907634098 |
| Olfr92      | 0,21  | 0,722262013 | 0,09  | 0,843731353 | -0,75 | 0,215429632 | 0,1   | 0,875508638 | 0,64  | 0,650292523 |
| Olfr920     | 0,42  | 0,511497074 | 0,94  | 0,094438943 | -0,22 | 0,817106175 | -0,3  | 0,831253708 | 0,4   | 0,793839436 |
| Olfr921     | 0,31  | 0,614878886 | 0,25  | 0,501438027 | 0,22  | 0,807786405 | -0,56 | 0,144438245 | -0,03 | 0,979392852 |
| Olfr922     | 0,14  | 0,835016158 | -0,04 | 0,967833514 | 0     | 0,997581017 | 0,29  | 0,502230334 | 0,28  | 0,809335788 |
| Olfr923     | 0,07  | 0,944546118 | 0,2   | 0,855607772 | -0,24 | 0,663029337 | -0,24 | 0,701167068 | -0,24 | 0,790424343 |
| Olfr924     | 0,08  | 0,874676538 | 0,03  | 0,944438314 | -0,14 | 0,77857305  | -0,15 | 0,768853258 | 0,08  | 0,922577223 |
| Olfr926     | 0     | 0,998345859 | 0,03  | 0,955302758 | -0,09 | 0,882540073 | 0,16  | 0,639200952 | 0,3   | 0,574285481 |
| Olfr93      | 0,35  | 0,421378808 | 0,01  | 0,999395995 | -0,21 | 0,727262258 | 0,19  | 0,80341881  | 0,27  | 0,728483022 |
| Olfr930     | 0,17  | 0,79059266  | -0,35 | 0,426168855 | -0,26 | 0,758410488 | 0     | 1           | -0,03 | 0,987948597 |
| Olfr933     | -0,04 | 0,942119638 | -0,02 | 0,979002922 | -0,01 | 0,99028057  | 0,2   | 0,593121153 | 0     | 0,997737614 |
| Olfr934     | 0,09  | 0,845495686 | 0     | 1           | -0,17 | 0,747599709 | 0,02  | 0,96648085  | 0,02  | 0,98611514  |
| Olfr935     | 0,15  | 0,783200207 | -0,22 | 0,696741566 | -0,01 | 0,990836784 | -0,17 | 0,652451672 | -0,32 | 0,498803884 |
| Olfr936     | 0     | 1           | 0,28  | 0,756584634 | -0,3  | 0,659694447 | 0,06  | 0,881649393 | 0,22  | 0,697757911 |
| Olfr937     | 0,09  | 0,892363276 | 0,01  | 0,996113371 | -0,19 | 0,777918093 | 0,31  | 0,583818261 | -0,03 | 0,979456872 |
| Olfr938     | 0,18  | 0,707502054 | 0,09  | 0,837500541 | 0,04  | 0,944361294 | -0,03 | 0,944769683 | 0,28  | 0,566248044 |
| Olfr94      | 0,39  | 0,4751854   | 0,13  | 0,866844066 | 0,13  | 0,808065828 | -0,01 | 0,984266596 | 0,26  | 0,602231893 |
| Olfr943     | -0,2  | 0,765643907 | -0,28 | 0,526459535 | 0,2   | 0,714609376 | 0,48  | 0,272589045 | 0,25  | 0,677687906 |
| Olfr945     | 0,05  | 0,943079514 | 0     | 0,999210601 | 0,03  | 0,967930981 | -0,12 | 0,71158821  | 0,05  | 0,952718905 |
| Olfr947-ps1 | 0,16  | 0,731202956 | 0,12  | 0,761929694 | 0,04  | 0,953951069 | -0,12 | 0,743174262 | 0,21  | 0,757562438 |
| Olfr948     | 0,15  | 0,707476585 | -0,12 | 0,822383509 | 0,08  | 0,917694073 | 0,29  | 0,580945748 | 0,09  | 0,916837154 |
| Olfr95      | -0,09 | 0,882475793 | 0,12  | 0,862998751 | -0,42 | 0,441256791 | -0,01 | 0,987247308 | -0,02 | 0,980961333 |

|         |       |             |       |             |       |             |       |             |       |             |
|---------|-------|-------------|-------|-------------|-------|-------------|-------|-------------|-------|-------------|
| Olfr951 | 0,24  | 0,63699384  | 0,39  | 0,576723643 | 0,01  | 0,991240121 | 0,03  | 0,944802384 | 0,11  | 0,884321797 |
| Olfr952 | 0,28  | 0,602160482 | 0,09  | 0,93451524  | -0,07 | 0,930193129 | -0,18 | 0,730467863 | 0,15  | 0,864099595 |
| Olfr954 | 0,23  | 0,714662474 | 0,12  | 0,809572266 | -0,06 | 0,92936515  | -0,11 | 0,75887854  | -0,09 | 0,906858775 |
| Olfr955 | 0,24  | 0,691658566 | -0,06 | 0,908190136 | 0,02  | 0,991477426 | -0,03 | 0,95956355  | 0,3   | 0,673120647 |
| Olfr957 | -0,03 | 0,971245076 | 0,25  | 0,674274094 | -0,01 | 0,99152264  | 0,11  | 0,792001973 | 0,13  | 0,871762678 |
| Olfr958 | 0,03  | 0,955835359 | 0     | 1           | -0,15 | 0,834979811 | -0,11 | 0,820103742 | -0,22 | 0,749100093 |
| Olfr959 | 0,09  | 0,858670539 | -0,05 | 0,938233008 | -0,85 | 0,419537272 | 0,2   | 0,770895082 | 0,74  | 0,118887411 |
| Olfr96  | 0,25  | 0,719691888 | -0,04 | 0,982053677 | -0,15 | 0,808747196 | 0,66  | 0,345820261 | -0,01 | 0,992370267 |
| Olfr960 | 0,02  | 0,983516046 | 0,1   | 0,915705187 | -0,03 | 0,978255748 | 0,22  | 0,597524283 | 0,31  | 0,670932333 |
| Olfr961 | 0,1   | 0,886889675 | -0,01 | 0,998818332 | 0,1   | 0,901071918 | -0,16 | 0,789931282 | -0,4  | 0,521841588 |
| Olfr963 | -0,04 | 0,948926586 | -0,13 | 0,80678645  | 0,3   | 0,540915598 | 0,25  | 0,561656192 | -0,03 | 0,980593822 |
| Olfr965 | -0,02 | 0,979574398 | -0,05 | 0,917832564 | 0,3   | 0,659694447 | -0,02 | 0,974813898 | -0,52 | 0,328821044 |
| Olfr967 | 0,18  | 0,765643907 | -0,05 | 0,926157704 | -0,01 | 0,990836784 | 0,24  | 0,452750906 | 0,34  | 0,490706572 |
| Olfr968 | 0,16  | 0,750362144 | -0,01 | 0,990979177 | -0,37 | 0,548995286 | -0,01 | 0,986544789 | -0,02 | 0,984065984 |
| Olfr969 | 0,1   | 0,845495686 | -0,02 | 0,989873399 | -0,44 | 0,361580981 | 0,09  | 0,855328721 | 0,27  | 0,702993783 |
| Olfr970 | 0,25  | 0,580784638 | 0,06  | 0,918167746 | -0,05 | 0,937566473 | -0,03 | 0,94830473  | 0,02  | 0,985269236 |
| Olfr971 | 0,26  | 0,559636965 | -0,08 | 0,875296321 | -0,03 | 0,963221639 | 0,06  | 0,9130534   | -0,04 | 0,966951657 |
| Olfr972 | -0,16 | 0,815219917 | 0,09  | 0,885372941 | -0,04 | 0,94940954  | -0,05 | 0,900529161 | 0,1   | 0,917110997 |
| Olfr974 | -0,02 | 0,990615139 | 0,04  | 0,981034135 | 0,11  | 0,90665     | -0,15 | 0,782250507 | 0,08  | 0,936891287 |
| Olfr975 | 0,03  | 0,965991176 | 0,1   | 0,846506525 | -0,09 | 0,901047389 | -0,13 | 0,765874546 | -0,06 | 0,947733697 |
| Olfr976 | 0,01  | 0,993728727 | 0,21  | 0,738199172 | 0,12  | 0,871283127 | -0,12 | 0,803228733 | 0,07  | 0,951429597 |
| Olfr978 | 0,06  | 0,927099161 | 0,04  | 0,966286347 | 0,11  | 0,885263358 | 0,27  | 0,613598847 | -0,08 | 0,938265452 |
| Olfr979 | 0,4   | 0,785400637 | -0,18 | 0,7219659   | -0,09 | 0,870078426 | -0,02 | 0,963412609 | -0,14 | 0,830813323 |
| Olfr98  | 0,07  | 0,918524426 | -0,05 | 0,977103763 | -0,1  | 0,910766724 | -0,09 | 0,811871922 | 0,07  | 0,928724353 |
| Olfr980 | 0,21  | 0,753576419 | -0,37 | 0,738199172 | -0,19 | 0,905049931 | 1,22  | 0,227401503 | 0,65  | 0,518472109 |
| Olfr981 | -0,16 | 0,823834951 | -0,02 | 0,982786635 | -0,2  | 0,817094336 | -0,04 | 0,937546205 | 0,03  | 0,969117862 |
| Olfr982 | 0,04  | 0,942651221 | 0,03  | 0,948496432 | -0,12 | 0,811944479 | -0,04 | 0,921032395 | -0,16 | 0,808079104 |
| Olfr983 | -0,11 | 0,859044359 | -0,14 | 0,899984623 | -0,08 | 0,914965671 | 0,17  | 0,619079614 | 0     | 0,998528074 |
| Olfr984 | -0,01 | 0,991919022 | 0,12  | 0,793797471 | -0,15 | 0,831266864 | -0,16 | 0,665832473 | -0,23 | 0,750504485 |
| Olfr985 | 0,42  | 0,581127661 | 0,08  | 0,935984823 | -0,06 | 0,95106142  | 0,14  | 0,778566413 | -0,26 | 0,697757911 |
| Olfr986 | 0,39  | 0,680520303 | 0,22  | 0,55571605  | -0,13 | 0,870263371 | 0,09  | 0,917580503 | -0,19 | 0,848977077 |
| Olfr99  | 1,58  | 0,01463807  | 0,07  | 0,978904487 | -0,59 | 0,465936592 | -0,19 | 0,828955037 | 0,12  | 0,952753183 |
| Olfr992 | 0,07  | 0,878562194 | 0,11  | 0,815973308 | 0,07  | 0,91821779  | -0,06 | 0,898842201 | -0,04 | 0,959573673 |
| Olfr993 | 0,07  | 0,901227658 | 0,04  | 0,951624051 | -0,28 | 0,61483831  | 0,04  | 0,927970621 | 0,09  | 0,904730291 |
| Olfr994 | 0,18  | 0,636247635 | 0,16  | 0,820806352 | -0,09 | 0,906007019 | -0,25 | 0,560223278 | -0,14 | 0,868037689 |



|         |       |             |       |             |       |             |       |             |       |             |
|---------|-------|-------------|-------|-------------|-------|-------------|-------|-------------|-------|-------------|
| Olfr995 | 0,04  | 0,942948768 | 0,15  | 0,718415174 | 0,03  | 0,973732268 | -0,16 | 0,632939682 | -0,12 | 0,863329101 |
| Olfr996 | 0,15  | 0,858477702 | -0,02 | 0,990052916 | -0,26 | 0,66611828  | 0,51  | 0,254205725 | 0,36  | 0,548342484 |
| Olfr998 | 0,33  | 0,757032046 | -0,71 | 0,583200444 | -0,07 | 0,922318683 | 0,3   | 0,767703032 | 0,16  | 0,893117638 |
| Olig1   | 0     | 0,996219097 | -0,11 | 0,824471857 | 0,16  | 0,782022139 | -0,12 | 0,837974367 | -0,05 | 0,956610289 |
| Olig2   | 0,05  | 0,927402567 | -0,12 | 0,916496897 | 0     | 0,999329448 | 0,1   | 0,835214439 | -0,12 | 0,894327929 |
| Olig3   | -0,16 | 0,785400637 | 0,08  | 0,896406642 | -0,21 | 0,771729329 | 0,16  | 0,72073475  | 0,18  | 0,821140509 |
| Olr1    | 1,8   | 0,043317574 | 0,66  | 0,439108392 | 0,22  | 0,909371204 | -1,17 | 0,582234931 | 1,61  | 0,592053999 |
| Oma1    | -0,05 | 0,973255755 | 0,02  | 0,987162042 | 0,08  | 0,952888594 | 0,02  | 0,986412644 | -0,24 | 0,801087157 |
| Omd     | 0,05  | 0,933253663 | 0,24  | 0,695689103 | -0,03 | 0,968742139 | -0,17 | 0,817984254 | 0,4   | 0,687240111 |
| Omg     | 0,14  | 0,884230844 | -0,04 | 0,934294134 | -0,11 | 0,882426352 | 0,03  | 0,941642671 | 0,1   | 0,94250983  |
| Omp     | 0,32  | 0,822613889 | -0,1  | 0,932628106 | -0,66 | 0,57717258  | -0,17 | 0,890879327 | -0,04 | 0,979341305 |
| Omt2a   | -0,29 | 0,606404793 | -0,55 | 0,612645853 | -0,34 | 0,645449124 | 0,25  | 0,580513589 | -0,11 | 0,933759514 |
| Omt2b   | -0,05 | 0,919556852 | 0,07  | 0,88721384  | -0,06 | 0,92807676  | -0,05 | 0,910298592 | 0,02  | 0,983617617 |
| Onecut1 | -0,1  | 0,84900712  | 0,19  | 0,702568161 | -0,32 | 0,463042777 | -0,24 | 0,674639078 | -0,22 | 0,760401775 |
| Onecut2 | 0,12  | 0,81630789  | -0,05 | 0,96497149  | 0,68  | 0,264885341 | 0,37  | 0,372962599 | -0,01 | 0,991628025 |
| Onecut3 | -0,12 | 0,753576419 | 0,17  | 0,722938629 | 0,5   | 0,327668044 | 0,11  | 0,825299388 | 0,16  | 0,801261375 |
| Ooep    | -0,07 | 0,938708479 | 0,1   | 0,930192503 | -0,26 | 0,733199564 | -0,13 | 0,899875162 | 0,4   | 0,704749238 |
| Oog1    | 0,02  | 0,984284343 | 0,04  | 0,982912884 | 0,25  | 0,686061973 | -0,07 | 0,891300791 | -0,06 | 0,960065122 |
| Oog3    | 0,1   | 0,899922256 | -0,3  | 0,679757061 | -0,01 | 0,995662132 | 0,06  | 0,917756311 | 0,24  | 0,68987325  |
| Oog4    | 0,15  | 0,856118781 | -0,08 | 0,956563498 | -0,14 | 0,871149274 | -0,04 | 0,968311421 | -0,07 | 0,962872595 |
| Oosp1   | -0,03 | 0,967121748 | 0,14  | 0,859932049 | -0,11 | 0,876684089 | 0,39  | 0,517178455 | -0,1  | 0,917522118 |
| Oosp2   | -0,21 | 0,761212734 | 0,21  | 0,790939978 | -0,22 | 0,780528725 | 0,12  | 0,897576959 | -0,06 | 0,946093915 |
| Oosp3   | 0,33  | 0,673291416 | -0,29 | 0,633883634 | -0,13 | 0,873457545 | 0,66  | 0,328472681 | 0,39  | 0,738901324 |
| Opa1    | -0,36 | 0,423859346 | 0,2   | 0,848775903 | 0,1   | 0,901410016 | 0,49  | 0,313125943 | 0,1   | 0,894192218 |
| Opa3    | -0,29 | 0,562065081 | 0,12  | 0,831647298 | -0,07 | 0,957152002 | -0,19 | 0,80341881  | 0,06  | 0,956790564 |
| Opalin  | 0,16  | 0,757032046 | 0     | 1           | 0,01  | 0,990485372 | 0,72  | 0,208453481 | 0,02  | 0,986849867 |
| Opcml   | 0,39  | 0,685826767 | 0,36  | 0,764216378 | -0,13 | 0,871929853 | -0,6  | 0,494887206 | -0,13 | 0,911975292 |
| Ophn1   | -0,47 | 0,578581789 | 0,45  | 0,507925771 | -0,27 | 0,742758388 | -0,11 | 0,889777753 | -0,18 | 0,864049783 |
| Oplah   | 0,07  | 0,943079514 | 0,29  | 0,664787536 | 0,29  | 0,599364835 | 0,1   | 0,876895238 | 0,26  | 0,774255591 |
| Opn1mw  | 0,23  | 0,735168146 | 0,12  | 0,898952381 | 0,28  | 0,661089127 | 0,02  | 0,97291242  | -0,02 | 0,984125319 |
| Opn1sw  | 0,31  | 0,562609036 | -0,04 | 0,966717367 | 0,07  | 0,939348603 | 0,15  | 0,799696249 | 0,49  | 0,45626465  |
| Opn3    | -0,74 | 0,239601221 | -0,46 | 0,582976316 | 0,53  | 0,509977728 | 0,09  | 0,947477693 | -0,03 | 0,989609635 |
| Opn4    | 0,21  | 0,757032046 | -0,01 | 0,994486533 | -0,08 | 0,917694073 | 0,3   | 0,634935038 | 0,18  | 0,877454343 |
| Opn5    | 0,73  | 0,089531229 | 0,27  | 0,686540452 | 0,16  | 0,784404969 | -0,05 | 0,943143586 | -0,2  | 0,747004489 |
| Oprd1   | 0,05  | 0,945535301 | -0,03 | 0,958545812 | -0,07 | 0,940550094 | 0,13  | 0,795185674 | 0,04  | 0,969617491 |

|         |       |             |       |             |       |             |       |             |       |             |
|---------|-------|-------------|-------|-------------|-------|-------------|-------|-------------|-------|-------------|
| Oprk1   | 0,35  | 0,470166881 | -0,32 | 0,561411813 | 0,37  | 0,473499244 | -0,15 | 0,791492345 | -0,2  | 0,769280739 |
| Oprl1   | 0,51  | 0,353022744 | -0,01 | 0,998164412 | 0,48  | 0,288357922 | 0,09  | 0,908141892 | 0,2   | 0,82482852  |
| Oprm1   | -0,02 | 0,977157992 | 0,12  | 0,842885677 | -0,22 | 0,770526999 | -0,04 | 0,944769683 | 0,21  | 0,731527639 |
| Optc    | 0,26  | 0,669456348 | 0,02  | 0,993221425 | -0,1  | 0,882540073 | 0,19  | 0,57095196  | 0,37  | 0,442579293 |
| Optn    | 0,06  | 0,91604975  | 0,56  | 0,353649732 | -0,26 | 0,680505102 | -0,79 | 0,133183454 | 0     | 0,999363756 |
| Orai1   | -0,05 | 0,937232549 | 0,27  | 0,579053234 | 0,32  | 0,648872381 | 0,57  | 0,101239783 | 0,11  | 0,89104084  |
| Orai2   | -0,25 | 0,731774338 | -0,05 | 0,922703368 | 0,19  | 0,743429698 | 0,52  | 0,279764872 | -0,69 | 0,213568117 |
| Orai3   | -0,41 | 0,316599006 | 0,17  | 0,883145635 | 0,57  | 0,489556221 | -0,34 | 0,485770197 | -0,5  | 0,462558109 |
| Oraov1  | -0,21 | 0,874335591 | 0,07  | 0,958376623 | -0,07 | 0,963199274 | -0,04 | 0,978056041 | -0,28 | 0,822081068 |
| Orc1    | -0,58 | 0,413781809 | -1,37 | 0,266681513 | 1,23  | 0,050780459 | 1,51  | 0,080185028 | 0,38  | 0,504009987 |
| Orc2    | -0,07 | 0,904633081 | -0,22 | 0,817365391 | 0,59  | 0,549446867 | 0,25  | 0,78891401  | -0,61 | 0,553623798 |
| Orc3    | -0,22 | 0,737459992 | -0,61 | 0,206494477 | 0,12  | 0,878636183 | 0,17  | 0,703831158 | -0,07 | 0,932627212 |
| Orc4    | 0,21  | 0,826464143 | 0,29  | 0,506403012 | 0,26  | 0,675674731 | 0,61  | 0,450467785 | 0,65  | 0,429106643 |
| Orc5    | -0,93 | 0,362152388 | -0,26 | 0,804576975 | 1,4   | 0,212291286 | 0,44  | 0,841644929 | 0,44  | 0,85508146  |
| Orc6    | -0,48 | 0,61200942  | -0,92 | 0,289058397 | 0,42  | 0,568871498 | 0,68  | 0,376631277 | 0,6   | 0,562557824 |
| Orm1    | 0,18  | 0,897717279 | -0,31 | 0,803283255 | -0,01 | 0,997268369 | 0,76  | 0,378366464 | 0,21  | 0,77959286  |
| Orm2    | 0,16  | 0,806370026 | -0,23 | 0,768584034 | -0,44 | 0,594276411 | -0,29 | 0,628643285 | 0,06  | 0,955499131 |
| Orm3    | 0,35  | 0,814334273 | 0,49  | 0,670564956 | 0,25  | 0,707845564 | 0,41  | 0,407916841 | -0,26 | 0,661160894 |
| Ormdl1  | -0,21 | 0,773916807 | 0,14  | 0,815439518 | 0,86  | 0,397324055 | -0,71 | 0,255558309 | 0,31  | 0,77959286  |
| Ormdl2  | 0,13  | 0,909036289 | 0,07  | 0,932292974 | 0,13  | 0,90110331  | 0,08  | 0,932315462 | 0,48  | 0,520240481 |
| Ormdl3  | -0,28 | 0,712552818 | -0,36 | 0,576532195 | 0,19  | 0,81808517  | -0,26 | 0,667849424 | -0,05 | 0,97425848  |
| Os9     | 0     | 0,998584113 | -0,01 | 0,994730653 | 0,15  | 0,834754831 | -0,23 | 0,682493216 | -0,26 | 0,709815513 |
| Osbp    | -0,06 | 0,935644409 | -0,23 | 0,704681588 | 0,3   | 0,714808135 | 0,41  | 0,61728308  | -0,06 | 0,973162988 |
| Osbp2   | -0,85 | 0,21466962  | -1,09 | 0,424068004 | 1,05  | 0,114679898 | 2,98  | 0,023328447 | 0,37  | 0,697626937 |
| Osbpl10 | 0,82  | 0,164203285 | 0,69  | 0,187729631 | -0,36 | 0,761861872 | 0,97  | 0,20381376  | -0,31 | 0,74637436  |
| Osbpl11 | 0,17  | 0,78851504  | -0,06 | 0,956934125 | -0,02 | 0,993379272 | 0,34  | 0,792527615 | 0,16  | 0,923530475 |
| Osbpl1a | -0,11 | 0,934146028 | 0,34  | 0,609361686 | 0,27  | 0,811424918 | -0,62 | 0,372503505 | -0,04 | 0,97872616  |
| Osbpl2  | -0,68 | 0,194977962 | -0,41 | 0,323938334 | 0,17  | 0,82622365  | 0,17  | 0,796472332 | 0,09  | 0,939127163 |
| Osbpl3  | -0,06 | 0,95561339  | -0,58 | 0,58096097  | 1,3   | 0,209534486 | 1,47  | 0,012084891 | -0,48 | 0,468672987 |
| Osbpl5  | -0,3  | 0,61342177  | -0,16 | 0,805949528 | 0,27  | 0,838289412 | -0,19 | 0,861140391 | -0,44 | 0,656275915 |
| Osbpl6  | -0,2  | 0,842292335 | -0,18 | 0,810418074 | -0,75 | 0,35180566  | -2,22 | 0,032617608 | 0,19  | 0,926008345 |
| Osbpl7  | -0,05 | 0,954746388 | 0,17  | 0,882609847 | 0,4   | 0,42059778  | -0,31 | 0,467341604 | -0,37 | 0,497980458 |
| Osbpl8  | 0,25  | 0,59362492  | 0,2   | 0,793603525 | 0,07  | 0,94178334  | -0,01 | 0,996074006 | 0,71  | 0,18003283  |
| Osbpl9  | 0,22  | 0,53353759  | 0,39  | 0,344189073 | -0,14 | 0,825835155 | -0,09 | 0,805378375 | 0,47  | 0,271218174 |
| Oscar   | 0,23  | 0,832490414 | 0,08  | 0,926157704 | -0,06 | 0,95204022  | -0,85 | 0,106358146 | -0,29 | 0,680015121 |

|        |       |             |       |             |       |             |       |             |       |             |
|--------|-------|-------------|-------|-------------|-------|-------------|-------|-------------|-------|-------------|
| Oscp1  | -0,91 | 0,292365356 | 0,17  | 0,89081665  | -0,34 | 0,778653031 | 0,29  | 0,763593883 | -1,03 | 0,209387396 |
| Oser1  | 0,39  | 0,382813814 | -0,04 | 0,951624051 | 0,27  | 0,742784486 | -0,07 | 0,867742716 | 0,13  | 0,841160223 |
| Osgep  | -0,36 | 0,600684822 | -0,33 | 0,542153202 | 0,05  | 0,969928932 | -0,21 | 0,69271453  | 0,25  | 0,678835814 |
| Osgep1 | -0,2  | 0,79498488  | 0,11  | 0,928134372 | -0,03 | 0,97674065  | -0,53 | 0,253294027 | -0,06 | 0,969020975 |
| Osgin1 | -0,24 | 0,727684698 | -0,06 | 0,925569254 | 0,21  | 0,772782651 | 0,07  | 0,887415354 | -0,18 | 0,827532593 |
| Osgin2 | -0,15 | 0,907178012 | 0,18  | 0,855632384 | 0,16  | 0,906747817 | -0,37 | 0,563786734 | 1,17  | 0,06170512  |
| Osm    | -0,19 | 0,756855996 | 0,14  | 0,812432185 | -0,09 | 0,910160525 | -0,24 | 0,633071558 | -0,26 | 0,646672171 |
| Osmr   | 0,96  | 0,156998083 | 0,72  | 0,113270918 | -0,77 | 0,30134516  | -0,95 | 0,024277883 | 0,29  | 0,540163677 |
| Osr1   | -0,09 | 0,936051646 | 0,45  | 0,3720905   | -0,53 | 0,627779838 | -0,25 | 0,747738268 | -0,18 | 0,90651116  |
| Osr2   | 0,1   | 0,914090929 | -0,12 | 0,91173239  | -0,5  | 0,270049721 | -0,15 | 0,794368434 | -0,07 | 0,945837469 |
| Ost4   | 0,02  | 0,98503681  | 0,09  | 0,920194416 | 0,35  | 0,501058575 | 0,76  | 0,122398805 | -0,02 | 0,985982505 |
| Ostc   | 0,23  | 0,701391957 | -0,35 | 0,508065278 | 0,88  | 0,121033211 | 1,07  | 0,290105047 | 0,26  | 0,861977667 |
| Ostf1  | 0,34  | 0,337532097 | 0,27  | 0,511594917 | -0,12 | 0,854917565 | 0,49  | 0,267147508 | 0,51  | 0,329423825 |
| Ostm1  | -0,16 | 0,854362032 | -0,03 | 0,98954147  | -0,23 | 0,876314859 | 0,03  | 0,96939036  | -0,05 | 0,966951657 |
| Ostn   | 0,13  | 0,84241758  | -0,2  | 0,756369219 | 0,05  | 0,934813979 | 0,44  | 0,565335362 | 0,1   | 0,942854766 |
| Otc    | 0,04  | 0,958188047 | 0,01  | 0,996963567 | -0,03 | 0,979791644 | -0,13 | 0,826471394 | 0,26  | 0,710098871 |
| Otoa   | 0,07  | 0,94326605  | -0,25 | 0,703291096 | -0,34 | 0,50696441  | -2,05 | 0,043446085 | -0,67 | 0,420215404 |
| Otof   | 0,12  | 0,885622132 | 0,07  | 0,905535217 | 0,1   | 0,890405742 | -0,01 | 0,981203009 | -0,11 | 0,877669996 |
| Otog   | -0,08 | 0,89081819  | 0,09  | 0,914229678 | -0,04 | 0,953292736 | -0,07 | 0,87407074  | -0,02 | 0,984125319 |
| Otogl  | -0,15 | 0,832696131 | 0,04  | 0,975765252 | 0,04  | 0,957193291 | -0,15 | 0,890879327 | -0,17 | 0,868885122 |
| Otol1  | -0,07 | 0,928499167 | -0,27 | 0,656204868 | -0,02 | 0,982305856 | -0,01 | 0,984714881 | -0,28 | 0,679323779 |
| Otop1  | -0,44 | 0,328021998 | 0,39  | 0,563458552 | -0,15 | 0,893141963 | 0,19  | 0,825342232 | 0,2   | 0,836697963 |
| Otop2  | 0,13  | 0,865055523 | 0,15  | 0,807175471 | -0,19 | 0,846176253 | 0,03  | 0,97105862  | 0,11  | 0,917844354 |
| Otop3  | -0,21 | 0,787157782 | -0,39 | 0,701175891 | 0,14  | 0,845651772 | 0,14  | 0,766621599 | 0,36  | 0,493460304 |
| Otor   | 0,43  | 0,410498707 | -0,1  | 0,887889466 | -0,04 | 0,966084659 | -0,18 | 0,793134304 | 0,16  | 0,899797564 |
| Otos   | 0,33  | 0,682102965 | -0,28 | 0,640846988 | -0,23 | 0,660920525 | -0,25 | 0,784077644 | -0,18 | 0,868066981 |
| Otp    | 0,1   | 0,909022395 | -0,18 | 0,831580851 | 0,17  | 0,85952125  | 0,41  | 0,216919521 | 0,02  | 0,987527273 |
| Otub1  | -0,12 | 0,77952013  | -0,24 | 0,514781187 | 0,45  | 0,500343254 | 0,51  | 0,122551381 | -0,38 | 0,487945047 |
| Otub2  | 0,17  | 0,841267394 | 0,14  | 0,919602924 | -0,29 | 0,724675525 | -0,16 | 0,807008095 | -0,3  | 0,825680274 |
| Otud1  | 0,31  | 0,674821764 | 0,11  | 0,857503073 | -0,05 | 0,948637233 | -1,39 | 0,009959417 | -0,4  | 0,460621168 |
| Otud3  | -0,46 | 0,68223979  | -0,29 | 0,490650707 | 0,12  | 0,909728993 | 0,34  | 0,485770197 | -0,82 | 0,274394155 |
| Otud4  | 0,05  | 0,937232549 | -0,16 | 0,786394409 | -0,34 | 0,64759465  | 0,54  | 0,106184746 | 0,29  | 0,555864261 |
| Otud5  | -0,15 | 0,8102165   | -0,01 | 0,990380046 | -0,08 | 0,935939183 | 0,33  | 0,302342827 | -0,26 | 0,6754671   |
| Otud6a | 0,11  | 0,816316218 | 0,03  | 0,956504634 | -0,11 | 0,841563482 | -0,02 | 0,95852873  | -0,08 | 0,914498972 |
| Otud6b | -0,49 | 0,531315808 | -0,25 | 0,70212029  | 0,3   | 0,789211611 | -0,12 | 0,768247504 | -0,06 | 0,945291688 |

|         |       |             |       |             |       |             |       |             |       |             |
|---------|-------|-------------|-------|-------------|-------|-------------|-------|-------------|-------|-------------|
| Otud7a  | -0,12 | 0,886741208 | 0,02  | 0,989209391 | -0,19 | 0,746662626 | 0,08  | 0,929835301 | -0,08 | 0,947559952 |
| Otud7b  | -0,03 | 0,965991176 | -0,14 | 0,889334606 | 0,88  | 0,050740082 | -0,04 | 0,946065261 | 0,08  | 0,92741476  |
| Otulin  | -0,28 | 0,820785667 | -0,05 | 0,96095671  | 0,03  | 0,985977985 | -0,08 | 0,945953123 | 0,14  | 0,914176188 |
| Otx1    | -0,13 | 0,853351904 | -0,39 | 0,699281555 | -0,34 | 0,588145967 | 0,3   | 0,686587495 | 0,22  | 0,724669859 |
| Otx2    | -0,45 | 0,592176997 | 0,15  | 0,87055803  | -0,02 | 0,987003605 | -0,33 | 0,618453093 | -0,05 | 0,949178165 |
| Otx2os1 | -0,11 | 0,8634587   | 0,27  | 0,622499716 | -0,09 | 0,910060392 | 0     | 1           | 0,08  | 0,948405104 |
| Ovch2   | -0,4  | 0,664456582 | -0,02 | 0,99687092  | 0,02  | 0,990836784 | -0,16 | 0,87811903  | 0,18  | 0,885673683 |
| Ovgp1   | 0,03  | 0,972974739 | -0,69 | 0,413185463 | 0,17  | 0,834042944 | 0,5   | 0,465294047 | 0,28  | 0,801385411 |
| Ovol1   | 0,06  | 0,955200574 | -0,19 | 0,715733316 | -0,19 | 0,751090942 | -0,13 | 0,855513966 | -0,23 | 0,73108884  |
| Ovol2   | -0,27 | 0,653534786 | -0,66 | 0,166830486 | 0,13  | 0,832500603 | -0,12 | 0,831764227 | 0,28  | 0,665178099 |
| Ovol3   | 0,18  | 0,758094656 | 0,12  | 0,935984823 | 0,08  | 0,906678445 | -0,13 | 0,899003207 | -0,38 | 0,712121015 |
| Oxa1l   | -0,07 | 0,909257268 | 0,1   | 0,923044405 | -0,16 | 0,796827289 | -0,08 | 0,916072825 | -0,2  | 0,801385411 |
| Oxct1   | -1,04 | 0,104092085 | -1,14 | 0,325139071 | 0,13  | 0,894018349 | 0,1   | 0,896599656 | 0,16  | 0,860591136 |
| Oxct2a  | 0,35  | 0,547914659 | 0,01  | 0,9957438   | -0,2  | 0,841563482 | -0,14 | 0,719540291 | 0,11  | 0,910829332 |
| Oxct2b  | 0,14  | 0,887874421 | 0,13  | 0,84786877  | -0,06 | 0,960677449 | -0,24 | 0,609350605 | -0,16 | 0,80155635  |
| Oxgr1   | -0,01 | 0,995230791 | -0,17 | 0,890945229 | -0,06 | 0,932577939 | 0,04  | 0,947809027 | -0,09 | 0,925744028 |
| Oxld1   | 0,1   | 0,909060375 | 0,08  | 0,952040045 | -0,13 | 0,928376443 | -0,54 | 0,451578827 | -0,38 | 0,428613647 |
| Oxnad1  | -0,15 | 0,923035054 | -0,45 | 0,590819012 | 0,93  | 0,137340423 | -0,03 | 0,97402012  | -0,16 | 0,844265172 |
| Oxr1    | 0,27  | 0,614727955 | 0,04  | 0,972706967 | -0,64 | 0,280780716 | 0,09  | 0,845785501 | 0,69  | 0,161067834 |
| Oxsm    | -0,29 | 0,762165257 | -0,08 | 0,923487338 | 0,43  | 0,705518101 | -0,3  | 0,371919494 | -0,58 | 0,356465925 |
| Oxsr1   | -0,07 | 0,958535933 | 0,23  | 0,586770731 | -0,3  | 0,762164022 | 0,41  | 0,745701862 | 0,26  | 0,902705254 |
| Oxt     | -0,08 | 0,926962211 | -0,06 | 0,904429034 | -0,41 | 0,641366948 | 0,08  | 0,873610553 | 0,52  | 0,410369443 |
| Oxtr    | 0,3   | 0,681371768 | -0,01 | 0,996865461 | -0,13 | 0,932866273 | -0,86 | 0,239185309 | -0,74 | 0,486308499 |
| P2rx1   | -0,57 | 0,238235179 | 0,14  | 0,809652214 | -0,31 | 0,711793051 | -0,29 | 0,779558647 | 0,4   | 0,704149783 |
| P2rx2   | -0,07 | 0,926919018 | 0,09  | 0,94347698  | -0,47 | 0,494685216 | -2,21 | 0,010029063 | -1,82 | 0,012837745 |
| P2rx3   | 0,22  | 0,84228513  | -0,24 | 0,801210484 | -0,06 | 0,947404922 | 0,44  | 0,276093686 | -0,09 | 0,925858284 |
| P2rx4   | -0,01 | 0,996219097 | -0,42 | 0,568304052 | 0,44  | 0,63335587  | -1,23 | 0,018041423 | -0,55 | 0,219210988 |
| P2rx5   | -0,35 | 0,61200942  | -0,22 | 0,807949539 | -0,1  | 0,904132011 | 0,46  | 0,454995407 | -0,06 | 0,953297732 |
| P2rx6   | -0,31 | 0,702902826 | -0,35 | 0,395413926 | -0,31 | 0,742757109 | 0,04  | 0,946065261 | 0,19  | 0,793952361 |
| P2rx7   | -0,5  | 0,460231397 | 0,13  | 0,925569254 | 0,39  | 0,59973428  | -0,16 | 0,85478696  | -1,45 | 0,069195544 |
| P2ry1   | -0,28 | 0,664456582 | -0,23 | 0,77148563  | -0,33 | 0,622546805 | -2,77 | 0,014039201 | -0,78 | 0,254633449 |
| P2ry10  | 0,19  | 0,808947569 | -0,02 | 0,981635653 | -0,45 | 0,53434233  | -0,07 | 0,895836916 | 0,66  | 0,223330086 |
| P2ry12  | -0,29 | 0,547519398 | 0,37  | 0,804529847 | 0,36  | 0,500343254 | 0,03  | 0,981610833 | -0,06 | 0,963377414 |
| P2ry13  | 0,18  | 0,700358581 | 0,27  | 0,785244931 | 0,21  | 0,891689344 | 0,09  | 0,845164782 | -0,08 | 0,961406182 |
| P2ry14  | -0,46 | 0,509815996 | 0,21  | 0,824372931 | 0,05  | 0,979031985 | -0,96 | 0,672331878 | -0,98 | 0,616140729 |

|              |       |             |       |             |       |             |       |             |       |             |
|--------------|-------|-------------|-------|-------------|-------|-------------|-------|-------------|-------|-------------|
| P2ry2        | -0,97 | 0,110873818 | -0,63 | 0,277253387 | 0,06  | 0,944376323 | -0,19 | 0,661977311 | -0,55 | 0,307250018 |
| P2ry4        | 0,12  | 0,809050839 | -0,03 | 0,965039248 | 0,14  | 0,856046789 | -0,26 | 0,593574244 | -0,22 | 0,763240477 |
| P2ry6        | -0,62 | 0,187868882 | -1,02 | 0,424371673 | 1,76  | 0,097897914 | 2,42  | 0,01517378  | -0,43 | 0,755576335 |
| P3h1         | -0,75 | 0,106547713 | -0,75 | 0,289402333 | 0,31  | 0,628048897 | 0,67  | 0,103449425 | -0,57 | 0,452989679 |
| P3h2         | 0,39  | 0,53662401  | 0,15  | 0,808422093 | 0,79  | 0,191716509 | 2,13  | 0,044942602 | -0,88 | 0,298446845 |
| P3h3         | -0,42 | 0,42717379  | -0,49 | 0,487771533 | 0,2   | 0,79007666  | 0,79  | 0,061836264 | -0,34 | 0,527658681 |
| P3h4         | -0,73 | 0,12999255  | -0,95 | 0,109267475 | 1,33  | 0,162847726 | 1,07  | 0,068401155 | -0,65 | 0,415016596 |
| P4ha1        | -0,13 | 0,841140165 | 0     | 1           | 0,42  | 0,358225844 | 0,47  | 0,489777233 | 0,23  | 0,808989975 |
| P4ha2        | 0,33  | 0,546065357 | -0,02 | 0,990088847 | 0,67  | 0,164746948 | -0,22 | 0,718553452 | -0,32 | 0,772878956 |
| P4ha3        | -0,29 | 0,799477555 | 0,33  | 0,406817158 | 0,57  | 0,158373494 | 0     | 0,998464205 | -0,25 | 0,658861823 |
| P4hb         | -0,08 | 0,865776054 | -0,24 | 0,51825831  | 0,53  | 0,224747376 | 0,76  | 0,067122689 | -0,32 | 0,635612479 |
| P4htm        | -0,51 | 0,453653527 | 0,08  | 0,871209587 | 0     | 0,999931921 | -0,93 | 0,128119399 | -0,2  | 0,819072786 |
| Pa2g4        | -0,61 | 0,176884717 | -0,55 | 0,226333843 | 0,15  | 0,845651772 | 0,79  | 0,267445738 | 0,17  | 0,881968395 |
| Pabpc1       | 0,15  | 0,707111377 | 0,01  | 0,98230594  | 0,16  | 0,800142198 | 0,68  | 0,070990471 | -0,03 | 0,96738578  |
| Pabpc1l      | 0,4   | 0,597082878 | 0,18  | 0,907700167 | 0,09  | 0,952104131 | 0,39  | 0,711963811 | -0,21 | 0,874829878 |
| Pabpc1l2b-ps | 0,15  | 0,719547217 | 0,09  | 0,846012678 | -0,45 | 0,302861841 | -0,06 | 0,912985122 | 0,16  | 0,808079104 |
| Pabpc2       | 0,13  | 0,822213681 | -0,32 | 0,470112519 | 0,06  | 0,933384842 | 0,32  | 0,487308323 | -0,11 | 0,890957032 |
| Pabpc4       | -0,12 | 0,85309792  | -0,66 | 0,410501758 | -0,03 | 0,978012085 | 1,34  | 0,06183258  | -0,17 | 0,859009237 |
| Pabpc4l      | 0,28  | 0,800851935 | -0,63 | 0,518494408 | -0,02 | 0,990836784 | 0,6   | 0,363119525 | 0,27  | 0,706086004 |
| Pabpc5       | 0,16  | 0,741907626 | 0,52  | 0,365968146 | 0,02  | 0,977293008 | -0,15 | 0,677756558 | 0,06  | 0,952753183 |
| Pabpc6       | -0,04 | 0,972720447 | 0,39  | 0,794036677 | 0     | 0,999931921 | 0,09  | 0,895344448 | -0,25 | 0,7911784   |
| Pabpn1       | -0,32 | 0,522076759 | -0,21 | 0,729741948 | 0,02  | 0,989923808 | 0,63  | 0,424776867 | 0,41  | 0,738901324 |
| Pabpn1l      | 0,47  | 0,433848441 | 0,01  | 0,994802028 | -0,21 | 0,638689491 | -0,9  | 0,277604398 | 0,13  | 0,917075631 |
| Pacrg        | 0     | 0,998307191 | 0,2   | 0,86695983  | -0,15 | 0,887947732 | -0,13 | 0,713579222 | 0,4   | 0,647876293 |
| Pacrgl       | -0,18 | 0,768809729 | -0,13 | 0,936792848 | 0,03  | 0,981674142 | 0,49  | 0,413553771 | -0,25 | 0,772971095 |
| Pacs1        | 0,18  | 0,821267687 | 0,18  | 0,790939978 | 0,41  | 0,61483831  | -0,25 | 0,551234268 | -0,44 | 0,360726287 |
| Pacs2        | -0,18 | 0,718996404 | 0     | 1           | 0,11  | 0,894866237 | -0,61 | 0,117249488 | 0,02  | 0,984125319 |
| Pacsin1      | 0,51  | 0,239601221 | 0,34  | 0,404113    | -0,96 | 0,321761132 | 0,02  | 0,982534991 | 0,77  | 0,289111735 |
| Pacsin2      | -0,31 | 0,469307745 | -0,22 | 0,736956168 | 0,24  | 0,688224792 | 0,16  | 0,645946116 | -0,16 | 0,766559546 |
| Pacsin3      | 0,29  | 0,717407143 | -1,15 | 0,182771552 | 0,14  | 0,916403684 | 0,47  | 0,347662455 | 0,59  | 0,566248044 |
| Padi1        | 0,05  | 0,958188047 | -0,28 | 0,651611182 | -0,05 | 0,973732268 | 0,46  | 0,446956803 | 0,12  | 0,902802615 |
| Padi2        | 0,18  | 0,739893701 | 0,01  | 0,98230594  | -0,23 | 0,749254864 | -0,11 | 0,893841279 | -0,11 | 0,926514899 |
| Padi3        | 0,25  | 0,636247635 | -0,05 | 0,930475368 | -0,2  | 0,711558404 | -0,01 | 0,994512187 | 0,01  | 0,993413582 |
| Padi4        | 0,01  | 0,996998625 | 0,67  | 0,262026824 | 0,17  | 0,835394722 | -0,35 | 0,310873282 | 0,16  | 0,88748628  |
| Padi6        | 0,05  | 0,917836966 | -0,3  | 0,674468926 | -0,25 | 0,721041453 | 0,25  | 0,599437231 | 0,16  | 0,825680274 |

|          |       |             |       |             |       |             |       |             |       |             |
|----------|-------|-------------|-------|-------------|-------|-------------|-------|-------------|-------|-------------|
| Paf1     | -0,21 | 0,63699384  | 0,17  | 0,756584634 | 0,02  | 0,986406216 | -0,01 | 0,980974642 | 0,28  | 0,583279373 |
| Pafah1b1 | -0,04 | 0,969577981 | 0,08  | 0,854940418 | -0,24 | 0,714346477 | 0,58  | 0,221461417 | 0,41  | 0,492222522 |
| Pafah1b2 | -0,45 | 0,21539327  | -0,15 | 0,815317911 | 0     | 0,997268369 | 0,75  | 0,154588425 | 0,22  | 0,745134899 |
| Pafah1b3 | 0,6   | 0,142873939 | 0,27  | 0,716668427 | 1,17  | 0,215124832 | 1,31  | 0,060887351 | 0,9   | 0,168781914 |
| Pafah2   | -0,09 | 0,90993458  | 0,37  | 0,73274163  | -0,03 | 0,982241391 | -0,62 | 0,428767536 | -0,78 | 0,172411855 |
| Pag1     | 0,27  | 0,654324758 | -0,07 | 0,932292974 | -0,14 | 0,862376532 | -0,98 | 0,026588488 | -0,15 | 0,918865935 |
| Pagr1a   | 0,42  | 0,61006769  | -0,17 | 0,844500324 | -0,35 | 0,642744068 | -0,06 | 0,923775458 | 0,02  | 0,985280749 |
| Pah      | -0,35 | 0,574900947 | 0,43  | 0,525873177 | 0,08  | 0,922274387 | -0,92 | 0,291672609 | 0,03  | 0,984125319 |
| Paics    | -0,17 | 0,801627644 | -0,82 | 0,214321569 | -0,01 | 0,997268369 | 0,64  | 0,244769083 | 0,27  | 0,765340194 |
| Paip1    | -0,6  | 0,252015445 | -0,27 | 0,773094512 | 0,59  | 0,637321546 | 1,27  | 0,48485622  | 0,2   | 0,946463658 |
| Paip2    | 0,12  | 0,793761299 | -0,08 | 0,863823062 | 0,36  | 0,418405756 | -0,2  | 0,570328279 | -0,26 | 0,656187572 |
| Paip2b   | 0,2   | 0,832798869 | 0,22  | 0,842885677 | 0,76  | 0,420505997 | -0,48 | 0,407916841 | 0,21  | 0,787488862 |
| Pak1     | 0,95  | 0,239601221 | 0,48  | 0,435489861 | 0,74  | 0,562629762 | 0,37  | 0,448506783 | 0,8   | 0,178793405 |
| Pak1ip1  | -0,13 | 0,83708246  | -0,25 | 0,666450149 | 0,03  | 0,973186233 | 0,2   | 0,671991774 | 0,31  | 0,573106355 |
| Pak2     | -0,12 | 0,861165752 | -0,36 | 0,530742692 | 0,24  | 0,741623367 | 1,01  | 0,038578722 | 0,16  | 0,826379382 |
| Pak3     | 0,04  | 0,981230643 | 0,18  | 0,857950143 | -0,29 | 0,801262194 | 0,24  | 0,604127556 | -0,59 | 0,498553997 |
| Pak4     | -0,38 | 0,317670222 | -0,54 | 0,216491969 | 0,85  | 0,260189398 | 0,77  | 0,082737748 | -0,57 | 0,266061487 |
| Pak6     | 0,22  | 0,844285362 | 0,82  | 0,273839061 | 0,08  | 0,917864691 | -0,07 | 0,927515427 | -0,41 | 0,651895091 |
| Pak7     | 0,04  | 0,959466597 | 0,23  | 0,749366654 | 0,38  | 0,461784527 | -0,27 | 0,564693464 | 0,07  | 0,953297732 |
| Pakap    | -0,76 | 0,673291416 | 0,13  | 0,934280572 | 0,81  | 0,235465446 | -0,35 | 0,891300791 | -1,63 | 0,359252386 |
| Palb2    | -0,01 | 0,991500399 | 0,25  | 0,671319666 | 0,58  | 0,436827113 | -0,95 | 0,321336556 | -1,17 | 0,224035026 |
| Pald1    | -0,43 | 0,27550648  | -0,41 | 0,334769294 | 0,11  | 0,859460126 | 1,15  | 0,050397942 | -0,84 | 0,149017743 |
| Palld    | -0,39 | 0,511005771 | 0,36  | 0,625875078 | 0,18  | 0,775282779 | -0,2  | 0,778212842 | 0,31  | 0,726042963 |
| Palm     | -0,92 | 0,074890017 | -0,57 | 0,327283051 | -0,06 | 0,95136091  | -0,91 | 0,124162112 | -0,36 | 0,593599703 |
| Palm2    | 0,35  | 0,600952042 | -0,11 | 0,921610565 | -0,51 | 0,662322838 | -0,07 | 0,943864463 | 0,11  | 0,959398085 |
| Palm3    | 0,19  | 0,704646948 | -0,04 | 0,951375162 | 0,22  | 0,791940256 | -0,01 | 0,98427899  | -0,24 | 0,709010136 |
| Palmd    | 0,05  | 0,94434357  | 0,35  | 0,467362999 | -0,19 | 0,869074305 | -0,3  | 0,473552953 | 0,07  | 0,932824449 |
| Pam      | -0,4  | 0,352228774 | -0,45 | 0,370517584 | 0,74  | 0,374422909 | -0,63 | 0,140865327 | -0,76 | 0,241922199 |
| Pam16    | 0,36  | 0,458591721 | 0,15  | 0,823246376 | 0,21  | 0,777918093 | 0,13  | 0,784479261 | 0,02  | 0,983469081 |
| Pamr1    | -0,46 | 0,36631183  | 0,37  | 0,694017753 | -0,36 | 0,724675525 | -0,25 | 0,699348716 | 0,12  | 0,907121694 |
| Pan2     | -0,34 | 0,712165686 | -0,1  | 0,857490594 | 0,67  | 0,44262387  | 0,02  | 0,978558892 | -0,13 | 0,89044341  |
| Pan3     | 0,35  | 0,596550801 | -0,08 | 0,887493001 | -0,37 | 0,638689491 | 0,53  | 0,229859806 | 0,19  | 0,800540569 |
| Panct2   | 0,1   | 0,869615106 | -0,15 | 0,828219939 | 0,2   | 0,766234611 | 0,16  | 0,72730344  | 0,12  | 0,876418697 |
| Pank1    | -0,78 | 0,483262226 | -0,49 | 0,438149324 | 0,74  | 0,445616611 | 0,45  | 0,39527702  | -0,58 | 0,531168722 |
| Pank2    | 0,46  | 0,365842999 | 0,15  | 0,831580851 | 0,03  | 0,984778342 | -0,21 | 0,614617075 | 0,01  | 0,990633766 |

|           |       |             |       |             |       |             |       |             |       |             |
|-----------|-------|-------------|-------|-------------|-------|-------------|-------|-------------|-------|-------------|
| Pank3     | -0,22 | 0,795659022 | 0,29  | 0,602956592 | 0,48  | 0,437676086 | 0,03  | 0,982577837 | -0,85 | 0,263913707 |
| Pank4     | -0,22 | 0,731202956 | -0,3  | 0,543090049 | 0,07  | 0,927950027 | -0,78 | 0,135202113 | -0,23 | 0,749918029 |
| Pantr1    | -0,03 | 0,972701787 | 0,29  | 0,570441768 | 0,2   | 0,699251274 | -0,14 | 0,835175707 | 0,26  | 0,734515607 |
| Panx1     | -0,19 | 0,785400637 | 0,22  | 0,695823136 | 0,44  | 0,546751391 | 1,11  | 0,278545889 | 0,58  | 0,597080822 |
| Panx2     | -0,23 | 0,717407143 | 0,28  | 0,54678282  | 0,05  | 0,941000382 | 0,19  | 0,664507481 | -0,17 | 0,883732171 |
| Panx3     | -0,19 | 0,680520303 | 0,15  | 0,870710009 | 0,16  | 0,771789829 | -0,08 | 0,921036173 | 0,23  | 0,747828814 |
| Paox      | -0,63 | 0,378598836 | -0,41 | 0,49125334  | 0,45  | 0,433481425 | -0,11 | 0,920036779 | -0,72 | 0,2909847   |
| Papd4     | 0,01  | 0,989346684 | -0,22 | 0,816354863 | 0,17  | 0,830336321 | 0,79  | 0,16909689  | 0,56  | 0,376385479 |
| Papd5     | 0,18  | 0,702148704 | 0,2   | 0,725783826 | 0,14  | 0,845993227 | -0,08 | 0,825884069 | 0,31  | 0,55605211  |
| Papd7     | -0,53 | 0,514370213 | -0,53 | 0,285481864 | 0,42  | 0,759025368 | 0,12  | 0,807489629 | -0,22 | 0,787061733 |
| Papln     | 0,3   | 0,62623041  | 0,5   | 0,635138707 | 0,42  | 0,647928093 | -1,02 | 0,064116388 | -1,11 | 0,06199374  |
| Papola    | 0,05  | 0,922988869 | -0,29 | 0,639698557 | 0,55  | 0,456286868 | 0,82  | 0,108216299 | 0,54  | 0,348829447 |
| Papolb    | 0,12  | 0,792238061 | 0,22  | 0,767178812 | -0,05 | 0,938323709 | 0,47  | 0,627490125 | 0,33  | 0,755115939 |
| Papolg    | 0,27  | 0,774394544 | 0,41  | 0,716769193 | 0,72  | 0,398087559 | -1,72 | 0,018980604 | -0,25 | 0,739851808 |
| Pappa     | 0,05  | 0,962442672 | 0,23  | 0,842663656 | -0,47 | 0,462123525 | -0,2  | 0,632409414 | 0,26  | 0,757428993 |
| Pappa2    | -0,01 | 0,996998625 | -0,78 | 0,200674509 | -0,28 | 0,564103482 | 0,22  | 0,706619788 | -0,2  | 0,823098095 |
| Papss1    | 0,01  | 0,991919022 | -0,5  | 0,467443634 | 0,17  | 0,893321094 | 0,22  | 0,920158794 | 0,09  | 0,976369538 |
| Papss2    | -0,81 | 0,214139353 | -0,17 | 0,822581347 | 0,79  | 0,566351122 | 2,26  | 0,022522121 | -0,57 | 0,472345843 |
| Paqr3     | 0,36  | 0,6308657   | 0,2   | 0,845663274 | 0,52  | 0,552970779 | -0,09 | 0,905471755 | -0,4  | 0,784792929 |
| Paqr4     | -0,02 | 0,991919022 | -0,18 | 0,74447539  | -0,16 | 0,904057901 | -0,35 | 0,418017948 | -0,28 | 0,724072134 |
| Paqr5     | 0,24  | 0,790449291 | -0,03 | 0,972336944 | 1     | 0,036818657 | -2,27 | 0,009399265 | -1,33 | 0,055520994 |
| Paqr6     | -0,25 | 0,679451519 | 0,2   | 0,810635763 | -0,12 | 0,891011584 | -0,23 | 0,718299331 | 0,32  | 0,652260335 |
| Paqr7     | -0,01 | 0,992533909 | -0,03 | 0,981635653 | 0,41  | 0,465936592 | -0,06 | 0,967047406 | -0,22 | 0,833049562 |
| Paqr8     | -0,75 | 0,311460152 | -0,13 | 0,843313499 | 0,97  | 0,221388606 | 0,42  | 0,47599855  | -0,75 | 0,402243953 |
| Paqr9     | 0,65  | 0,208125259 | 0,17  | 0,821941061 | 0,09  | 0,899171797 | 0,12  | 0,742706747 | 0,4   | 0,487945047 |
| Pard3     | -0,01 | 0,996774488 | 0,13  | 0,863633125 | 0,79  | 0,135721222 | -0,89 | 0,096085093 | 0,19  | 0,844324205 |
| Pard3b    | -0,24 | 0,761457464 | -0,08 | 0,922649946 | -0,41 | 0,504024124 | -0,95 | 0,195886404 | -0,08 | 0,953297732 |
| Pard3bos1 | 0,58  | 0,354799284 | 0,03  | 0,981758111 | -0,46 | 0,476345413 | 0,6   | 0,57819548  | 0,22  | 0,815177988 |
| Pard6a    | 0,04  | 0,959985598 | -0,41 | 0,605164723 | 0,28  | 0,779970041 | -0,46 | 0,467580023 | -0,95 | 0,198832044 |
| Pard6b    | 0,05  | 0,964154899 | -0,2  | 0,703255839 | 0,21  | 0,725191296 | 0,14  | 0,753242411 | 0,1   | 0,913414593 |
| Pard6g    | -0,31 | 0,762798673 | 0,01  | 0,999210601 | -0,62 | 0,606295906 | -2,61 | 0,008006726 | -0,91 | 0,077516449 |
| Parg      | 0,13  | 0,876019664 | 0     | 1           | -0,77 | 0,201021683 | 0,33  | 0,331328372 | 0,38  | 0,434997258 |
| Park2     | 0,1   | 0,934073085 | 0,17  | 0,887752277 | -0,39 | 0,57717258  | -1,72 | 0,133679424 | -0,15 | 0,947559952 |
| Park7     | -0,29 | 0,467684198 | -0,3  | 0,500862972 | 0,35  | 0,573830674 | 0,46  | 0,36375507  | -0,19 | 0,814394495 |
| Parl      | -0,48 | 0,317205194 | -0,47 | 0,326531488 | 0,54  | 0,299010171 | 0,5   | 0,270957766 | 0,02  | 0,986849867 |

|         |       |             |       |             |       |             |       |             |       |             |
|---------|-------|-------------|-------|-------------|-------|-------------|-------|-------------|-------|-------------|
| Parm1   | -0,21 | 0,818587047 | -0,1  | 0,912535732 | -0,01 | 0,997268369 | -0,91 | 0,045809254 | -0,47 | 0,32673984  |
| Parn    | 0,13  | 0,922118639 | -0,19 | 0,712546063 | 0,68  | 0,204247489 | 0,2   | 0,579333727 | -0,24 | 0,716229308 |
| Parp1   | -0,37 | 0,520545783 | -0,94 | 0,223537    | 0,73  | 0,272570712 | 0,56  | 0,596699221 | 0,18  | 0,898185407 |
| Parp10  | 0,45  | 0,592209611 | 0,77  | 0,213731156 | -1,13 | 0,03090075  | 0,1   | 0,872512015 | 1,39  | 0,016509496 |
| Parp11  | 0,84  | 0,38239969  | 1,05  | 0,20689584  | -0,45 | 0,505038995 | 0,19  | 0,764982654 | 1,65  | 0,015389935 |
| Parp12  | 0,41  | 0,537459076 | 0,5   | 0,293430625 | -0,98 | 0,064246958 | -0,19 | 0,716994919 | 0,77  | 0,126518262 |
| Parp14  | 1,17  | 0,139575871 | 1,23  | 0,059833617 | -1,6  | 0,01619228  | 0,24  | 0,462701825 | 1,63  | 0,005249666 |
| Parp16  | 0,55  | 0,418450504 | 0,17  | 0,880473303 | 0     | 0,997733499 | 0,54  | 0,606018577 | 0,08  | 0,967522546 |
| Parp2   | 0,3   | 0,738448626 | -0,07 | 0,945241217 | 0,66  | 0,716391747 | -0,23 | 0,556282326 | 0,1   | 0,901341817 |
| Parp3   | 0,59  | 0,312439966 | 0,81  | 0,121458348 | -0,83 | 0,10424513  | 0,74  | 0,064018281 | 2,1   | 0,003659564 |
| Parp4   | -0,09 | 0,844095084 | 0,05  | 0,915635399 | -0,77 | 0,12691088  | -0,35 | 0,325137997 | 0,31  | 0,560460932 |
| Parp6   | 0,04  | 0,953175228 | 0,36  | 0,624292684 | -0,15 | 0,887118162 | -0,49 | 0,323062629 | -0,04 | 0,967522546 |
| Parp8   | 0,54  | 0,347499801 | 0,36  | 0,41028104  | -0,19 | 0,822852885 | 2,29  | 0,004609582 | 1,3   | 0,017772402 |
| Parp9   | 0,99  | 0,189915286 | 0,91  | 0,173713363 | -0,98 | 0,034637859 | 0,54  | 0,260503826 | 1,69  | 0,011688351 |
| Parppb  | -1,42 | 0,01522448  | -0,39 | 0,607209439 | 0,73  | 0,33075776  | 1,15  | 0,113657145 | -0,5  | 0,571626211 |
| Pars2   | -0,58 | 0,436086286 | -0,2  | 0,793603525 | 0,43  | 0,656037746 | -0,18 | 0,743625096 | 0,08  | 0,951236192 |
| Particl | -0,19 | 0,659879365 | -0,05 | 0,920078217 | 0,05  | 0,95204022  | -0,13 | 0,80049982  | 0,22  | 0,790424343 |
| Parva   | -0,26 | 0,533055802 | -0,13 | 0,817367084 | 0,22  | 0,735280906 | 0,51  | 0,197760953 | -0,66 | 0,324281141 |
| Parvb   | -0,15 | 0,724502628 | -0,19 | 0,781665479 | 0,04  | 0,962766843 | -0,17 | 0,604479227 | -0,07 | 0,927908317 |
| Parvg   | 0,93  | 0,243426651 | 0,28  | 0,74245372  | -0,19 | 0,875486206 | -1,18 | 0,259970167 | -0,39 | 0,752873495 |
| Pask    | -1    | 0,104092085 | -1,07 | 0,277253387 | 1,44  | 0,067204732 | 1,09  | 0,036841765 | -0,79 | 0,288407041 |
| Pate1   | -0,66 | 0,586350752 | -0,05 | 0,943782735 | 0     | 0,999329448 | -0,18 | 0,676010477 | 0,08  | 0,950267521 |
| Pate2   | -0,14 | 0,882060783 | 0,22  | 0,853162838 | -0,26 | 0,733423502 | 0,46  | 0,327747643 | -0,21 | 0,836697963 |
| Pate3   | 0,18  | 0,679989164 | 0,2   | 0,693869108 | -0,2  | 0,737821076 | 0,26  | 0,578047707 | 0,42  | 0,438956045 |
| Pate4   | 0,46  | 0,570800344 | 0,2   | 0,782712411 | 0,2   | 0,70803739  | -0,13 | 0,802093612 | -0,12 | 0,880931325 |
| Patl1   | 0,04  | 0,959985598 | -0,06 | 0,920755087 | -0,07 | 0,952005428 | 0,13  | 0,757184832 | 0,04  | 0,96963338  |
| Patl2   | 0,14  | 0,813188717 | 0,11  | 0,850001559 | -0,15 | 0,816710945 | -0,04 | 0,960854419 | -0,06 | 0,953297732 |
| Patz1   | -0,83 | 0,371310005 | -0,12 | 0,852461907 | -0,14 | 0,923048046 | -1,41 | 0,083401972 | -0,75 | 0,34276619  |
| Pawr    | 0,53  | 0,438059907 | 0,2   | 0,612662008 | -0,11 | 0,934813979 | 0,28  | 0,709403957 | -0,01 | 0,994174876 |
| Pax1    | -1,21 | 0,208083039 | 0,26  | 0,823246376 | -0,68 | 0,259550802 | -0,29 | 0,775780803 | -0,29 | 0,830268209 |
| Pax2    | 0,72  | 0,185196531 | 0,29  | 0,792112243 | -0,24 | 0,774879696 | -1,13 | 0,036871879 | 0,08  | 0,968130547 |
| Pax3    | 0,21  | 0,699129557 | -0,4  | 0,547143296 | 0,84  | 0,203549298 | 0,33  | 0,550371604 | 0,13  | 0,893064058 |
| Pax4    | -0,22 | 0,809050839 | 0,17  | 0,790939978 | -0,28 | 0,59755586  | -0,37 | 0,240123494 | 0,37  | 0,429352602 |
| Pax5    | 0,39  | 0,673291416 | 0,02  | 0,996113371 | 0,04  | 0,970992385 | 0,18  | 0,890047959 | 0,38  | 0,743854135 |
| Pax6    | -0,27 | 0,581911399 | 0,11  | 0,90203459  | 0,06  | 0,960650487 | 0,1   | 0,859695995 | -0,2  | 0,75103789  |



|         |       |             |       |             |       |             |       |             |       |             |
|---------|-------|-------------|-------|-------------|-------|-------------|-------|-------------|-------|-------------|
| Pax6os1 | -0,38 | 0,568455852 | -0,03 | 0,986782918 | -0,63 | 0,620837479 | -0,46 | 0,594129905 | -0,16 | 0,923040447 |
| Pax7    | 0,28  | 0,597519827 | 0,06  | 0,966961979 | -0,29 | 0,546286708 | 0,11  | 0,900618083 | 0,03  | 0,974553568 |
| Pax8    | -0,09 | 0,914554423 | -0,26 | 0,804897085 | -0,07 | 0,935168506 | -0,73 | 0,48728376  | -0,28 | 0,840952901 |
| Pax9    | -0,03 | 0,976574175 | 0,04  | 0,978904487 | -0,12 | 0,86085314  | -0,3  | 0,671343347 | -0,24 | 0,825990389 |
| Paxbp1  | -0,26 | 0,772078475 | -0,15 | 0,80000598  | 0,09  | 0,932866273 | 0,42  | 0,517565104 | 0,26  | 0,774518756 |
| Paxip1  | -0,63 | 0,510434756 | -0,58 | 0,23919586  | 0,72  | 0,294163114 | 0,28  | 0,563786734 | -0,4  | 0,521776411 |
| Pbdc1   | -0,25 | 0,69184055  | -0,53 | 0,382365241 | 0,56  | 0,430424599 | 0,71  | 0,115245353 | 0,21  | 0,738260196 |
| Pbk     | -1,41 | 0,214430522 | -2,85 | 0,087315688 | 2,52  | 0,020876868 | 3,53  | 0,00495718  | 0,74  | 0,221488709 |
| Pbld1   | -0,12 | 0,886741208 | 0,16  | 0,900801202 | -0,25 | 0,702541777 | -0,67 | 0,065063652 | -0,43 | 0,575912277 |
| Pbld2   | 0,27  | 0,534498513 | -0,34 | 0,693906911 | -0,08 | 0,932866273 | -0,19 | 0,709724394 | 0,06  | 0,953297732 |
| Pbp2    | -0,26 | 0,613990129 | -0,17 | 0,850735633 | 0,88  | 0,545894079 | -0,08 | 0,943143586 | -0,16 | 0,910249438 |
| Pbrm1   | 0,05  | 0,943258586 | -0,01 | 0,999395995 | -0,29 | 0,611144549 | -0,22 | 0,774826947 | -0,27 | 0,710368081 |
| Pbsn    | 0,26  | 0,640002115 | -0,19 | 0,855394007 | -0,11 | 0,863503599 | -0,02 | 0,957573971 | -0,07 | 0,94919447  |
| Pbx1    | 0,13  | 0,9124306   | 0,24  | 0,854940418 | 0,26  | 0,755633965 | -3,49 | 0,005494861 | -0,22 | 0,748520754 |
| Pbx2    | -0,86 | 0,295213202 | -0,03 | 0,969006633 | 0,25  | 0,868451584 | -0,27 | 0,454995407 | -0,34 | 0,518401681 |
| Pbx3    | -0,18 | 0,761457464 | -0,43 | 0,702845299 | 0,3   | 0,807521381 | 0,65  | 0,398029171 | -0,19 | 0,879075155 |
| Pbx4    | -0,06 | 0,958126198 | 0,48  | 0,508065278 | 0,29  | 0,695705149 | -0,24 | 0,71622756  | -0,02 | 0,984125319 |
| Pbxip1  | 0     | 0,99658     | -0,15 | 0,900801202 | -0,04 | 0,968874924 | -0,5  | 0,258141807 | -0,48 | 0,420470441 |
| Pcbd1   | -0,67 | 0,602160482 | -0,36 | 0,555906531 | 1,98  | 0,044715282 | 0,04  | 0,993337409 | -0,3  | 0,892547331 |
| Pcbd2   | -0,2  | 0,690085958 | -0,38 | 0,425561668 | -0,05 | 0,951363099 | 0,22  | 0,855756608 | 0,06  | 0,975441362 |
| Pcbp1   | -0,16 | 0,699168612 | -0,06 | 0,893005076 | 0,17  | 0,733423502 | 0,57  | 0,12617717  | 0,1   | 0,890833196 |
| Pcbp2   | -0,08 | 0,886680488 | -0,04 | 0,951768918 | 0,08  | 0,892881818 | 0,13  | 0,691509113 | -0,06 | 0,946185373 |
| Pcbp3   | -0,28 | 0,778869381 | -0,32 | 0,563746321 | 0,8   | 0,092337758 | -0,8  | 0,066302565 | -0,84 | 0,317053551 |
| Pcbp4   | -1,09 | 0,175830295 | -0,01 | 0,995205602 | 0,02  | 0,991456043 | 1,09  | 0,287130544 | 1,12  | 0,300599421 |
| Pcca    | 0,02  | 0,984972115 | -0,35 | 0,383826859 | 0,26  | 0,844133077 | 0,23  | 0,48505774  | -0,04 | 0,965244101 |
| Pccb    | -0,6  | 0,333351712 | -0,61 | 0,2014299   | 0,38  | 0,738492256 | -0,08 | 0,875427736 | 0,02  | 0,983713871 |
| Pcdh1   | -0,33 | 0,444232002 | 0,08  | 0,898998198 | 0,21  | 0,82622365  | 0,71  | 0,11992248  | -0,33 | 0,745574572 |
| Pcdh10  | -0,04 | 0,959714813 | -0,32 | 0,869515524 | 0     | 0,997581017 | -0,06 | 0,970931237 | -0,06 | 0,95985938  |
| Pcdh11x | 0,12  | 0,867025523 | 0,42  | 0,55893837  | 0,02  | 0,987356432 | -0,55 | 0,359060095 | -0,03 | 0,979456872 |
| Pcdh12  | -1,62 | 0,058225809 | -0,84 | 0,23599174  | 0,47  | 0,493193538 | 0,34  | 0,624884935 | -0,45 | 0,692397745 |
| Pcdh15  | 0,22  | 0,699349399 | 0,34  | 0,715688609 | 0,19  | 0,808027675 | -0,25 | 0,581634072 | 0,07  | 0,939127163 |
| Pcdh17  | -0,54 | 0,215332386 | 0,08  | 0,875688773 | -0,06 | 0,95106142  | -0,22 | 0,593574244 | 0,05  | 0,954892212 |
| Pcdh18  | -0,3  | 0,796692713 | 0,43  | 0,647475869 | -0,13 | 0,833493578 | -0,75 | 0,522252373 | 0,84  | 0,583279373 |
| Pcdh19  | 1,5   | 0,016666769 | 0,57  | 0,314703215 | -0,92 | 0,27041915  | 2,94  | 0,007101957 | 1,11  | 0,043727018 |
| Pcdh20  | 0,41  | 0,624961842 | 0,07  | 0,936792848 | -0,2  | 0,762462025 | 0,24  | 0,657493591 | -0,16 | 0,876719251 |

|         |       |             |       |             |       |             |       |             |       |             |
|---------|-------|-------------|-------|-------------|-------|-------------|-------|-------------|-------|-------------|
| Pcdh7   | 0,39  | 0,617280733 | 0,26  | 0,854858856 | -0,06 | 0,946842192 | 0,86  | 0,575912901 | -0,24 | 0,91252831  |
| Pcdh8   | -0,36 | 0,628548235 | -0,01 | 0,994802028 | -0,13 | 0,821984166 | 0,2   | 0,661916932 | -0,14 | 0,885777129 |
| Pcdh9   | -0,08 | 0,889411759 | 0     | 1           | -0,25 | 0,715407764 | -1,15 | 0,045809254 | -0,66 | 0,574285481 |
| Pcdha1  | -0,02 | 0,991216662 | -0,19 | 0,807409259 | -0,07 | 0,959862254 | 0,49  | 0,509774032 | 0,24  | 0,845218636 |
| Pcdha10 | -0,07 | 0,94881239  | -0,67 | 0,565603216 | -0,08 | 0,968008918 | 0,81  | 0,673735682 | 0,66  | 0,6754671   |
| Pcdha11 | -0,22 | 0,748619201 | 0,29  | 0,642928016 | -0,68 | 0,520788057 | 0,1   | 0,838637101 | -0,8  | 0,311800369 |
| Pcdha12 | -0,18 | 0,850571655 | -0,48 | 0,638366221 | -0,21 | 0,852491954 | 0,35  | 0,530193027 | -0,32 | 0,65779331  |
| Pcdha2  | 0,46  | 0,59756524  | 0,38  | 0,559617305 | 0,03  | 0,990644839 | -0,57 | 0,618254643 | 0,02  | 0,99004065  |
| Pcdha3  | 0,39  | 0,613859526 | 0,09  | 0,955382206 | -0,23 | 0,794194778 | -0,06 | 0,897576959 | -0,18 | 0,801385411 |
| Pcdha4  | 0,01  | 0,995658455 | -0,19 | 0,907909875 | 0,07  | 0,929395646 | -0,02 | 0,975851115 | -0,09 | 0,922012322 |
| Pcdha5  | 0,05  | 0,978153995 | -0,77 | 0,568282579 | -0,62 | 0,512312279 | -0,05 | 0,921600281 | -0,93 | 0,047747467 |
| Pcdha6  | 0,41  | 0,620468351 | -0,33 | 0,667749553 | -0,09 | 0,950846671 | 0,26  | 0,789616492 | 0,15  | 0,904040121 |
| Pcdha7  | 0,38  | 0,841140165 | -0,57 | 0,459231649 | 0,69  | 0,494684911 | 0,47  | 0,548775366 | -0,52 | 0,677993077 |
| Pcdha8  | 0,15  | 0,89763852  | 0,54  | 0,502255372 | 0,23  | 0,838280035 | 0,27  | 0,69151142  | -0,22 | 0,859581581 |
| Pcdha9  | 0,4   | 0,569203163 | -0,69 | 0,468878881 | -0,33 | 0,689058581 | 0,23  | 0,872609749 | -0,12 | 0,91339829  |
| Pcdhac1 | 0,06  | 0,956452501 | 0,04  | 0,982786635 | -0,08 | 0,962519999 | 0,29  | 0,658442345 | -0,65 | 0,661829904 |
| Pcdhac2 | 0,56  | 0,628802144 | 0,75  | 0,472042875 | -0,12 | 0,944078985 | 0,15  | 0,836619631 | 0,06  | 0,951429597 |
| Pcdhb1  | 0,06  | 0,906885053 | -0,11 | 0,853157482 | 0,04  | 0,958846299 | 0,01  | 0,983166423 | -0,03 | 0,974553568 |
| Pcdhb10 | -0,21 | 0,864509523 | -0,35 | 0,583957108 | 0,24  | 0,887782273 | 0,34  | 0,71402903  | 0,28  | 0,859663155 |
| Pcdhb11 | 0,12  | 0,901662324 | -0,08 | 0,956857157 | 0,34  | 0,624087446 | -1,32 | 0,208729417 | -1,07 | 0,337492586 |
| Pcdhb12 | -0,04 | 0,966775766 | 0,16  | 0,895853001 | 0,5   | 0,560847022 | -0,22 | 0,869234665 | -0,41 | 0,726563756 |
| Pcdhb13 | 0,13  | 0,940526277 | -0,52 | 0,429168189 | 0,21  | 0,857677279 | 0,57  | 0,349614803 | -1,58 | 0,052927887 |
| Pcdhb14 | -0,33 | 0,485558004 | -0,25 | 0,792112243 | 1,05  | 0,157817229 | 1,43  | 0,067623231 | 0,07  | 0,940438527 |
| Pcdhb15 | 0,4   | 0,564019844 | -0,26 | 0,790939978 | -0,67 | 0,660920525 | 0,96  | 0,639200952 | 0,18  | 0,953971867 |
| Pcdhb16 | -0,13 | 0,826083295 | 0,17  | 0,793956721 | 0,14  | 0,917672398 | 0,82  | 0,13409404  | 0,31  | 0,655956123 |
| Pcdhb17 | -0,03 | 0,984183188 | 0,09  | 0,946599376 | 0,68  | 0,279758763 | 1,49  | 0,433497759 | 0,67  | 0,749887358 |
| Pcdhb18 | -0,38 | 0,582798732 | 0,2   | 0,802440628 | 0,16  | 0,887118162 | 0,83  | 0,089682181 | -0,2  | 0,829280005 |
| Pcdhb19 | -0,11 | 0,944807001 | -0,35 | 0,664787536 | 0,08  | 0,947881687 | 1,27  | 0,027401066 | 0,07  | 0,948935854 |
| Pcdhb2  | -0,58 | 0,554519131 | -1,37 | 0,507925771 | 0,69  | 0,560191012 | 1,13  | 0,441740032 | -0,11 | 0,947559952 |
| Pcdhb20 | -0,15 | 0,834672627 | -0,36 | 0,435489861 | 0,58  | 0,443039118 | 0,96  | 0,035837218 | -0,75 | 0,12854282  |
| Pcdhb21 | 0,17  | 0,845591898 | 0,03  | 0,988548122 | 1,16  | 0,491914817 | 1,64  | 0,091159146 | 0,66  | 0,509807322 |
| Pcdhb22 | -0,39 | 0,530199446 | -0,35 | 0,436251163 | 1,76  | 0,006274682 | 1,59  | 0,019207625 | -0,87 | 0,368554903 |
| Pcdhb3  | -0,48 | 0,680176782 | -0,11 | 0,828219939 | 0,23  | 0,877036149 | 0,14  | 0,864854123 | -1,05 | 0,147618827 |
| Pcdhb4  | -0,91 | 0,104092085 | -0,73 | 0,622855078 | 0,17  | 0,923350407 | 0,17  | 0,82237355  | -0,75 | 0,389664866 |
| Pcdhb5  | -0,06 | 0,963865514 | -0,35 | 0,799515227 | 0,84  | 0,475629395 | 1,39  | 0,177192888 | -0,23 | 0,780761723 |

|          |       |             |       |             |       |             |       |             |       |             |
|----------|-------|-------------|-------|-------------|-------|-------------|-------|-------------|-------|-------------|
| Pcdhb6   | 0,53  | 0,516558764 | -0,84 | 0,676903594 | 0,8   | 0,316070595 | -0,43 | 0,532718291 | 0,57  | 0,493919589 |
| Pcdhb7   | -0,67 | 0,530939867 | -0,73 | 0,532539731 | 0,83  | 0,273645359 | 0,58  | 0,337625105 | 0,25  | 0,775753249 |
| Pcdhb8   | -0,31 | 0,66235833  | -0,1  | 0,824927818 | 0,05  | 0,966414094 | -0,14 | 0,75817228  | -0,03 | 0,979456872 |
| Pcdhb9   | 0,71  | 0,472739337 | -0,55 | 0,664787536 | -0,37 | 0,804910036 | 1,01  | 0,480121746 | 0,26  | 0,912890826 |
| Pcdhga1  | -0,69 | 0,704459303 | 0,62  | 0,664787536 | -0,32 | 0,852306527 | -0,18 | 0,872609749 | 0,27  | 0,765327693 |
| Pcdhga10 | -0,36 | 0,597519827 | 0,11  | 0,929324001 | -0,44 | 0,446493846 | -0,29 | 0,640737261 | -0,11 | 0,888858935 |
| Pcdhga11 | -0,42 | 0,778869381 | 0,18  | 0,87189957  | -0,02 | 0,993379272 | -0,37 | 0,622308751 | -0,26 | 0,703778332 |
| Pcdhga12 | 0,04  | 0,979901745 | 0,36  | 0,842793123 | 0,51  | 0,666268302 | -0,3  | 0,809429622 | -0,18 | 0,867265242 |
| Pcdhga2  | 0,81  | 0,460231397 | 0,04  | 0,958376623 | -0,56 | 0,414966032 | -0,37 | 0,446858732 | -0,11 | 0,911850421 |
| Pcdhga3  | -0,35 | 0,700019125 | 0,4   | 0,772994145 | -0,04 | 0,977827235 | 0,65  | 0,302214149 | -0,06 | 0,952190189 |
| Pcdhga4  | -0,08 | 0,960597621 | 0,14  | 0,802615172 | -0,27 | 0,8768401   | -0,45 | 0,373645618 | 0,26  | 0,797293554 |
| Pcdhga5  | 0,48  | 0,360242306 | -0,19 | 0,875768275 | -0,58 | 0,342313446 | -0,55 | 0,403746542 | -0,41 | 0,614310952 |
| Pcdhga6  | -0,16 | 0,902861556 | 0,15  | 0,829136983 | -0,47 | 0,521457644 | -0,47 | 0,546387172 | -0,4  | 0,550388446 |
| Pcdhga7  | -0,32 | 0,693001144 | 0,37  | 0,818613446 | -0,17 | 0,90665     | -0,28 | 0,813727501 | -0,04 | 0,977991682 |
| Pcdhga8  | 0,15  | 0,900892804 | 0,04  | 0,990088847 | -0,03 | 0,986800862 | -0,47 | 0,676659386 | 0,22  | 0,879075155 |
| Pcdhga9  | 0,53  | 0,317205194 | 0,25  | 0,618087796 | -0,23 | 0,834069966 | -0,32 | 0,540689057 | 0,11  | 0,938286826 |
| Pcdhgb1  | -0,16 | 0,881663401 | 0,2   | 0,611052267 | -0,29 | 0,743900482 | -0,07 | 0,893609448 | -0,23 | 0,739121045 |
| Pcdhgb2  | -0,04 | 0,972701787 | 0,32  | 0,419795665 | -0,77 | 0,321280032 | 0,04  | 0,945566991 | 0,11  | 0,880134862 |
| Pcdhgb4  | -0,45 | 0,758136438 | 0,18  | 0,808498635 | 1,04  | 0,560191012 | -0,15 | 0,866095879 | 0,02  | 0,992694729 |
| Pcdhgb5  | 0,77  | 0,405822217 | -0,07 | 0,961331753 | -0,34 | 0,793014016 | -1,1  | 0,112183607 | -0,14 | 0,884640084 |
| Pcdhgb6  | -0,16 | 0,876019664 | 0,13  | 0,882589938 | -0,17 | 0,851593229 | 0,27  | 0,76240803  | 0,45  | 0,607537752 |
| Pcdhgb7  | 0,03  | 0,982432452 | -0,16 | 0,790939978 | 0,14  | 0,902672106 | -0,09 | 0,925056005 | -0,68 | 0,345202025 |
| Pcdhgb8  | 0,6   | 0,50685922  | 0,18  | 0,856600114 | 0,03  | 0,980423952 | 0,31  | 0,825247725 | -0,08 | 0,968130547 |
| Pcdhgc3  | -0,55 | 0,200445816 | -0,11 | 0,853735712 | 0,56  | 0,342313446 | 0,94  | 0,097913459 | 0,06  | 0,953297732 |
| Pcdhgc4  | -0,69 | 0,455860008 | -0,7  | 0,215633458 | 0,1   | 0,946777487 | 1,34  | 0,058597347 | 0,07  | 0,958778604 |
| Pcdhgc5  | 0,59  | 0,741332778 | -0,77 | 0,639698557 | -0,08 | 0,977897176 | 0,77  | 0,67892809  | -1,02 | 0,582641392 |
| Pced1a   | -0,53 | 0,302006612 | -0,31 | 0,755498335 | 0,46  | 0,641764537 | 0,01  | 0,991001566 | 0,27  | 0,707200675 |
| Pced1b   | 0,11  | 0,872001075 | -0,08 | 0,925777705 | -0,64 | 0,418405756 | -0,16 | 0,813727501 | 0,23  | 0,835191    |
| Pcf11    | 0,18  | 0,777335496 | 0,32  | 0,538124718 | -0,18 | 0,845321518 | -0,53 | 0,158683874 | 0,06  | 0,937841989 |
| Pcgf1    | -0,47 | 0,658101632 | -0,23 | 0,842663656 | 0,83  | 0,57717258  | -0,39 | 0,76730825  | -0,52 | 0,68987325  |
| Pcgf2    | 0,02  | 0,987965359 | 0,14  | 0,922123472 | 0,92  | 0,249821562 | -0,17 | 0,829908689 | -0,35 | 0,657070737 |
| Pcgf3    | -0,06 | 0,948926586 | -0,16 | 0,873411651 | -0,03 | 0,976712056 | 0,64  | 0,252124832 | 0,19  | 0,797699757 |
| Pcgf5    | 1,04  | 0,163853445 | 0,97  | 0,177712345 | -0,56 | 0,436827113 | 0,38  | 0,737473324 | 1,47  | 0,117559195 |
| Pcgf6    | -0,06 | 0,944652244 | -0,36 | 0,328485456 | 0,53  | 0,646965864 | 0,83  | 0,307395427 | 0,61  | 0,583064152 |
| Pcid2    | 0,03  | 0,963228289 | 0,8   | 0,397118736 | 0,03  | 0,982305856 | -0,68 | 0,357899145 | -0,24 | 0,784083827 |

|          |       |             |       |             |       |             |       |             |       |             |
|----------|-------|-------------|-------|-------------|-------|-------------|-------|-------------|-------|-------------|
| Pcif1    | -0,62 | 0,139492533 | 0,13  | 0,855632384 | 0,03  | 0,96858449  | -0,74 | 0,091636661 | -0,19 | 0,765419939 |
| Pck1     | 0,25  | 0,62865825  | -0,18 | 0,810875398 | -0,05 | 0,959862254 | -1,1  | 0,216001644 | -0,23 | 0,844187425 |
| Pck2     | -0,14 | 0,874688734 | -0,07 | 0,957957101 | -0,26 | 0,687268336 | 0,11  | 0,825017636 | -0,41 | 0,548124051 |
| Pclo     | -0,27 | 0,613387484 | -0,17 | 0,808498635 | -0,02 | 0,987356432 | 0,5   | 0,350588504 | 0,34  | 0,554975763 |
| Pcm1     | -0,14 | 0,803761785 | 0,19  | 0,831688343 | 0,37  | 0,57717258  | -0,38 | 0,531765246 | 0,34  | 0,562348217 |
| Pcmt1    | -0,13 | 0,851052318 | -0,2  | 0,807295403 | 0,19  | 0,777918093 | 0,32  | 0,467341604 | 0,26  | 0,654271552 |
| Pcmtd1   | 0,65  | 0,279889648 | 0,66  | 0,145709196 | -1,26 | 0,021337213 | -0,55 | 0,399965011 | 0,73  | 0,300599421 |
| Pcmtd2   | -0,27 | 0,810208393 | -0,18 | 0,84526289  | 0,19  | 0,923350407 | -0,63 | 0,140865327 | -0,33 | 0,665051452 |
| Pcna     | -0,3  | 0,416909288 | -0,43 | 0,404342738 | 0,59  | 0,221124073 | -0,11 | 0,782187164 | 0,11  | 0,866966085 |
| Pcnp     | 0,43  | 0,552940583 | 0,39  | 0,697111597 | 0,65  | 0,302861841 | -0,52 | 0,521662753 | -0,07 | 0,947559952 |
| Pcnt     | -0,33 | 0,421957622 | -0,5  | 0,254708337 | 0,36  | 0,583151958 | -0,15 | 0,768036061 | -0,25 | 0,731906907 |
| Pcnx     | 0,39  | 0,376151377 | 0,74  | 0,372823162 | -0,47 | 0,527929204 | 0,35  | 0,633092233 | -0,05 | 0,968130547 |
| Pcnx2    | 0,26  | 0,820023436 | 0,13  | 0,79599265  | 0,13  | 0,896430102 | 0,11  | 0,805958778 | 0,01  | 0,990633766 |
| Pcnx3    | -0,21 | 0,660640764 | -0,2  | 0,774958903 | -0,15 | 0,787094995 | 0     | 1           | -0,35 | 0,462558109 |
| Pcnx4    | -0,09 | 0,932324918 | 0,07  | 0,910688765 | 0,95  | 0,085429661 | 0,02  | 0,988205241 | -0,11 | 0,9162287   |
| Pcolce   | 0,02  | 0,986795639 | -0,14 | 0,899496232 | 0,63  | 0,36356264  | 0,9   | 0,038935822 | 0     | 0,997782491 |
| Pcolce2  | -0,01 | 0,989409736 | -0,26 | 0,789051952 | 0,96  | 0,492973363 | -2,01 | 0,006194852 | -0,86 | 0,299354036 |
| Pcp2     | -0,08 | 0,965116762 | 0,23  | 0,857490594 | -0,05 | 0,977827235 | -0,01 | 0,996714438 | 0,86  | 0,312830548 |
| Pcp4     | 0,25  | 0,680776928 | 0,09  | 0,87609938  | 0,11  | 0,898190421 | 0,15  | 0,676391555 | -0,01 | 0,99316648  |
| Pcp4l1   | 0,05  | 0,919567534 | -0,21 | 0,815022365 | 0,26  | 0,693486995 | -1,27 | 0,064362547 | -0,3  | 0,573106355 |
| Pcsk1    | -0,15 | 0,808485591 | 0,2   | 0,69316089  | -0,01 | 0,99407001  | -0,35 | 0,465446267 | -0,42 | 0,540089233 |
| Pcsk1n   | 0,1   | 0,857585372 | -0,02 | 0,98859071  | 0,14  | 0,823695413 | 0,01  | 0,992636995 | -0,33 | 0,551972106 |
| Pcsk2    | 0,76  | 0,16740295  | -0,02 | 0,985764487 | -0,14 | 0,875089034 | 0,11  | 0,777441584 | 0,06  | 0,940438527 |
| Pcsk2os1 | 0,48  | 0,585597429 | 0,45  | 0,642151308 | 0,35  | 0,559616081 | -0,26 | 0,774826947 | -0,01 | 0,994774512 |
| Pcsk2os2 | 0,12  | 0,899359458 | -0,11 | 0,926157704 | -0,18 | 0,80598891  | 0,65  | 0,120338347 | 0,25  | 0,708533352 |
| Pcsk4    | 0,07  | 0,925510521 | 0,04  | 0,977204386 | -0,08 | 0,927950027 | 0,16  | 0,855041248 | 0,28  | 0,755982506 |
| Pcsk5    | -0,34 | 0,576406658 | 0,02  | 0,986782918 | 0,15  | 0,857763054 | -3,23 | 0,003907268 | 0,17  | 0,795326093 |
| Pcsk6    | -1,47 | 0,106666298 | -0,91 | 0,370515616 | 0,43  | 0,525516245 | 1,99  | 0,027731544 | -1,37 | 0,060291953 |
| Pcsk7    | -0,39 | 0,648730873 | -0,21 | 0,704389345 | 0,11  | 0,915836302 | 0,68  | 0,065831648 | -0,49 | 0,371860356 |
| Pcsk9    | -0,12 | 0,840909921 | -0,11 | 0,882847123 | 0,09  | 0,928606229 | -0,16 | 0,665234661 | 0,18  | 0,813522311 |
| Pctp     | -0,15 | 0,796208298 | -0,28 | 0,79295936  | 0,54  | 0,448143106 | 0,08  | 0,961484044 | -0,5  | 0,711096219 |
| Pcx      | -0,41 | 0,557053469 | -0,44 | 0,520216476 | 0,37  | 0,443825248 | 0,29  | 0,604127556 | 0,7   | 0,250045114 |
| Pcyox1   | -0,19 | 0,716815978 | -0,04 | 0,95429671  | 0,23  | 0,821984166 | -0,39 | 0,23294682  | -0,69 | 0,153803813 |
| Pcyox1l  | -0,06 | 0,971922167 | -1,04 | 0,244759024 | 0,44  | 0,678840444 | -0,11 | 0,884310418 | -1,33 | 0,058814936 |
| Pcyt1a   | -0,58 | 0,153824107 | -0,07 | 0,938233008 | 0,05  | 0,968677508 | 0,2   | 0,794036325 | 0,2   | 0,823209444 |

|          |       |             |       |             |       |             |       |             |       |             |
|----------|-------|-------------|-------|-------------|-------|-------------|-------|-------------|-------|-------------|
| Pcyt1b   | -0,02 | 0,984096321 | -0,05 | 0,966078321 | -0,18 | 0,899387868 | 0,18  | 0,830974926 | 0,35  | 0,713599145 |
| Pcyt2    | -0,2  | 0,751534367 | -0,09 | 0,937873977 | 0,69  | 0,214382422 | 0,19  | 0,703831158 | 0,18  | 0,794570285 |
| Pdap1    | -0,22 | 0,70137787  | -0,64 | 0,345409693 | 0,36  | 0,4959575   | 0,66  | 0,117247807 | -0,26 | 0,626846143 |
| Pdc      | -0,15 | 0,807991079 | 0,13  | 0,9381453   | -0,52 | 0,412103362 | -0,33 | 0,483610814 | -0,06 | 0,975441362 |
| Pdcd1    | 0,17  | 0,834417597 | -0,08 | 0,872863558 | -0,1  | 0,917981605 | -0,04 | 0,963343418 | 0,02  | 0,991628025 |
| Pdcd10   | 0,34  | 0,459989765 | -0,03 | 0,981586987 | 0,19  | 0,800846011 | 0,28  | 0,546690905 | 0,35  | 0,499989818 |
| Pdcd11   | -0,53 | 0,312439966 | -0,19 | 0,635374994 | 0,03  | 0,973732268 | 0,01  | 0,99282298  | -0,29 | 0,673120647 |
| Pdcd1lg2 | 0,4   | 0,531771765 | -0,06 | 0,932292974 | -0,27 | 0,840187016 | -0,21 | 0,674665764 | -0,25 | 0,728184446 |
| Pdcd2    | -0,05 | 0,959714813 | 0,43  | 0,318261487 | 0,69  | 0,29586945  | -0,64 | 0,098577249 | 0,29  | 0,558798237 |
| Pdcd2l   | -0,21 | 0,798333389 | 0,27  | 0,664787536 | -0,14 | 0,886920157 | -0,24 | 0,684758871 | 0,19  | 0,765256761 |
| Pdcd4    | -0,27 | 0,569203163 | 0,06  | 0,9554581   | 0,42  | 0,773365699 | -1,08 | 0,065364848 | -0,51 | 0,39916841  |
| Pdcd5    | 0,08  | 0,919242881 | -0,46 | 0,568477792 | -0,07 | 0,938864861 | 0,47  | 0,518808113 | -0,2  | 0,782448008 |
| Pdcd6    | -0,12 | 0,803761785 | 0,05  | 0,924011565 | 0,3   | 0,632167655 | 0,28  | 0,373052286 | 0,16  | 0,840036408 |
| Pdcd6ip  | -0,18 | 0,628802144 | -0,17 | 0,789848307 | 0,11  | 0,876684089 | 0,41  | 0,246084171 | 0,14  | 0,835833283 |
| Pdcd7    | -0,11 | 0,903817676 | 0,26  | 0,792112243 | 0,42  | 0,624087446 | 0,37  | 0,621810528 | 0,97  | 0,199537078 |
| Pdcl     | -0,56 | 0,348951185 | 0,31  | 0,769360279 | 0,04  | 0,969476711 | -0,33 | 0,702311689 | 0,42  | 0,575302934 |
| Pdcl2    | -0,01 | 0,989784447 | 0,13  | 0,922703368 | -0,34 | 0,70635953  | -0,12 | 0,791387489 | -0,49 | 0,500610551 |
| Pdcl3    | -0,51 | 0,261006087 | -0,02 | 0,982786635 | 0,31  | 0,582996039 | 0,14  | 0,841563753 | 0,31  | 0,666438118 |
| Pddc1    | -0,21 | 0,813220024 | -0,2  | 0,892996423 | 0,44  | 0,62332895  | 0,05  | 0,969377207 | -0,38 | 0,723036695 |
| Pde10a   | -0,18 | 0,733667688 | 0,26  | 0,703558337 | 0,18  | 0,831275588 | 0,18  | 0,823314899 | 0,47  | 0,601077802 |
| Pde11a   | -0,39 | 0,600995396 | -0,23 | 0,825120426 | 0,01  | 0,994838841 | 0,41  | 0,522511755 | 0,26  | 0,792404969 |
| Pde12    | -0,33 | 0,448406902 | -0,05 | 0,942410245 | 0,02  | 0,990836784 | -1,2  | 0,055684557 | -0,26 | 0,70740752  |
| Pde1a    | -0,03 | 0,990206192 | -0,26 | 0,74760299  | -0,12 | 0,904132011 | -0,88 | 0,373018152 | 0,13  | 0,955910202 |
| Pde1b    | 0,4   | 0,663683553 | -0,26 | 0,793842674 | 0,05  | 0,971043051 | 0,87  | 0,140538478 | -0,37 | 0,684658891 |
| Pde1c    | -0,38 | 0,42935185  | 0,26  | 0,81976908  | 0,54  | 0,408971158 | 0,22  | 0,880059459 | 0,06  | 0,976430805 |
| Pde2a    | -1,04 | 0,090466364 | -0,43 | 0,296331627 | 0,49  | 0,363077839 | -0,97 | 0,051396459 | -0,67 | 0,199441919 |
| Pde3a    | 0,52  | 0,658908562 | 0,29  | 0,51825831  | 0,35  | 0,47647024  | -2,83 | 0,003907268 | -0,17 | 0,802268258 |
| Pde3b    | -0,29 | 0,529626842 | 0,25  | 0,693906911 | 0,4   | 0,735003288 | 1,7   | 0,045809254 | -0,39 | 0,638780444 |
| Pde4a    | -0,01 | 0,996998625 | -0,32 | 0,664710351 | -0,39 | 0,56948206  | 0,95  | 0,164446341 | -0,08 | 0,947901649 |
| Pde4b    | -0,12 | 0,856375297 | -0,15 | 0,767178812 | 0,2   | 0,882540073 | 1,5   | 0,081025202 | 0,48  | 0,684349871 |
| Pde4c    | -0,13 | 0,761120978 | -0,2  | 0,807175471 | 0,27  | 0,719128082 | -0,57 | 0,688041015 | -0,72 | 0,59705803  |
| Pde4d    | -0,19 | 0,794265051 | -0,5  | 0,552960632 | 0,09  | 0,937520804 | 0,15  | 0,826553444 | -0,69 | 0,286600165 |
| Pde4dip  | -0,36 | 0,498376122 | -0,11 | 0,808498635 | 0,46  | 0,378741497 | 0,19  | 0,785767773 | 0,09  | 0,938191016 |
| Pde5a    | -1,14 | 0,13473547  | 0,07  | 0,936792848 | 1,37  | 0,10729909  | -1,37 | 0,117589332 | -1,33 | 0,199537078 |
| Pde6a    | -0,24 | 0,7914678   | 0,17  | 0,729741948 | -0,05 | 0,963199274 | -0,42 | 0,523255995 | 0,05  | 0,967325392 |

|        |       |             |       |             |       |             |       |             |       |             |
|--------|-------|-------------|-------|-------------|-------|-------------|-------|-------------|-------|-------------|
| Pde6b  | -0,42 | 0,441563147 | 0,19  | 0,724005117 | 0,17  | 0,760075811 | 0,03  | 0,967911364 | 0,11  | 0,897611151 |
| Pde6c  | -0,01 | 0,991919022 | 0,35  | 0,43105638  | 0,02  | 0,981490968 | -0,33 | 0,390869984 | 0,11  | 0,886402747 |
| Pde6d  | 0,3   | 0,466960111 | 0     | 1           | 0,2   | 0,882359468 | -0,11 | 0,857993844 | -0,2  | 0,760657649 |
| Pde6g  | -0,06 | 0,944309453 | -0,45 | 0,580317491 | -0,17 | 0,847223474 | -0,75 | 0,120895967 | -0,64 | 0,278240482 |
| Pde6h  | -0,32 | 0,606922012 | -0,01 | 0,999210601 | 0,11  | 0,886600095 | -2,37 | 0,012409055 | -1,51 | 0,060191534 |
| Pde7a  | -0,41 | 0,534265938 | -0,31 | 0,566263948 | 0,37  | 0,579136238 | 0,27  | 0,645781937 | -0,5  | 0,445849764 |
| Pde7b  | -0,23 | 0,761457464 | -1,23 | 0,276143165 | -0,4  | 0,589451508 | -1,1  | 0,116706163 | -0,48 | 0,598277181 |
| Pde8a  | -0,48 | 0,178589155 | -0,58 | 0,187729631 | 0,06  | 0,944441051 | 0,17  | 0,69151142  | -0,37 | 0,505021443 |
| Pde8b  | -0,56 | 0,287459734 | 0,14  | 0,879707211 | -0,16 | 0,8290371   | -1,17 | 0,047357954 | -0,15 | 0,874554354 |
| Pde9a  | -0,29 | 0,701391957 | -0,01 | 0,998237793 | 0,86  | 0,138770182 | -0,12 | 0,816608499 | -0,21 | 0,881623966 |
| Pdgfa  | 0,68  | 0,273563517 | 1,01  | 0,158579743 | -0,72 | 0,217137859 | 0,59  | 0,165050366 | 0,77  | 0,127656125 |
| Pdgfb  | -1,15 | 0,038393911 | 0,03  | 0,965147491 | 0,43  | 0,66170364  | 0,83  | 0,221411237 | -0,02 | 0,990091016 |
| Pdgfc  | 1,06  | 0,078970882 | 0,77  | 0,38334636  | 1,46  | 0,180243962 | -1,76 | 0,096370975 | 0,55  | 0,639071244 |
| Pdgfd  | -0,03 | 0,965998749 | 0,09  | 0,85726965  | -0,05 | 0,957327097 | -0,45 | 0,374723126 | -0,04 | 0,973428839 |
| Pdgfra | -0,23 | 0,869441443 | 0,11  | 0,89081665  | -0,06 | 0,96043738  | 0,01  | 0,990388217 | -0,34 | 0,631479776 |
| Pdgfrb | -0,59 | 0,673291416 | 0,77  | 0,179411793 | 0,42  | 0,621814518 | -1,15 | 0,063503394 | -0,73 | 0,221702602 |
| Pdgfrl | -0,11 | 0,9231839   | -0,49 | 0,43731683  | 0,05  | 0,950846671 | 0,26  | 0,560823199 | -0,11 | 0,920355527 |
| Pdha1  | 0,01  | 0,988846353 | -0,58 | 0,450316092 | -0,2  | 0,849342965 | 0,55  | 0,363922515 | -0,1  | 0,92519473  |
| Pdha2  | 0,31  | 0,59710379  | -0,14 | 0,765358146 | 0,06  | 0,927986051 | 0,28  | 0,503825028 | -0,22 | 0,794273741 |
| Pdhb   | -0,07 | 0,915384511 | 0,04  | 0,952293161 | 0,28  | 0,715497532 | -0,13 | 0,687560664 | -0,14 | 0,868299217 |
| Pdhx   | 0,16  | 0,799472935 | -0,17 | 0,926134516 | -0,16 | 0,882248195 | 0,59  | 0,538266024 | 0,51  | 0,675282484 |
| Pdia2  | -0,09 | 0,947345661 | -0,42 | 0,38710682  | 0,2   | 0,847227535 | 0,09  | 0,818693228 | 0,13  | 0,894327929 |
| Pdia3  | 0,06  | 0,919567534 | 0     | 0,999210601 | -0,06 | 0,963725374 | 0,41  | 0,27561198  | 0,42  | 0,338653241 |
| Pdia4  | 0,03  | 0,965116762 | -0,17 | 0,763005394 | 0,55  | 0,295720005 | 0,73  | 0,138507202 | 0,19  | 0,811321326 |
| Pdia5  | -0,26 | 0,586458491 | -0,33 | 0,526101975 | 0,06  | 0,959990799 | -0,98 | 0,128606842 | -0,74 | 0,220768726 |
| Pdia6  | 0,02  | 0,972667767 | -0,02 | 0,973449551 | 0,04  | 0,968638834 | 1,06  | 0,062574017 | 0,73  | 0,360726287 |
| Pdik1l | -0,26 | 0,791808536 | -0,03 | 0,974159037 | -0,16 | 0,80317529  | 0,28  | 0,620676152 | 0,62  | 0,305995061 |
| Pdilt  | 0,37  | 0,676800971 | -0,16 | 0,852068212 | 0,33  | 0,59976087  | 0,25  | 0,548057593 | -0,15 | 0,83005877  |
| Pdk1   | 0,25  | 0,701086418 | -0,31 | 0,651942972 | -0,31 | 0,775163644 | 1,58  | 0,053645239 | 0,99  | 0,15539058  |
| Pdk2   | -0,39 | 0,627616426 | -0,27 | 0,701236298 | 0,26  | 0,732540375 | -0,58 | 0,190450965 | -0,62 | 0,30479841  |
| Pdk3   | 0,4   | 0,681371768 | -0,26 | 0,486279052 | 1,41  | 0,379638471 | 1,29  | 0,089643256 | 0,55  | 0,542647134 |
| Pdk4   | 0,62  | 0,523524394 | 1,15  | 0,322591012 | -1,32 | 0,064338945 | -0,37 | 0,461824013 | 0,49  | 0,278240482 |
| Pdlim1 | -0,13 | 0,757032046 | 0,1   | 0,857490594 | 0,04  | 0,956570063 | 3,3   | 0,003907268 | -0,22 | 0,867634057 |
| Pdlim2 | -0,54 | 0,233500023 | 0,19  | 0,782652703 | -0,31 | 0,767771051 | -1,16 | 0,018915917 | 0,14  | 0,868992925 |
| Pdlim3 | -0,41 | 0,441176207 | -0,06 | 0,965147491 | 0,63  | 0,543696688 | -1,61 | 0,077958924 | -0,04 | 0,980945466 |

|            |       |             |       |             |       |             |       |             |       |             |
|------------|-------|-------------|-------|-------------|-------|-------------|-------|-------------|-------|-------------|
| Pdlim4     | 0,16  | 0,832623267 | -0,39 | 0,373487552 | -0,28 | 0,657897557 | 1,39  | 0,072914823 | -0,35 | 0,787488862 |
| Pdlim5     | -0,25 | 0,60797154  | 0,41  | 0,46415666  | 0,1   | 0,927986051 | 0,33  | 0,494392613 | 0,09  | 0,925858284 |
| Pdlim7     | -0,19 | 0,776139269 | -0,48 | 0,539700767 | 0,07  | 0,938864861 | 0,93  | 0,096824863 | 0,13  | 0,904730291 |
| Pdp1       | -0,29 | 0,619750703 | 0,09  | 0,882609847 | 0,47  | 0,399470425 | -0,24 | 0,617531543 | 0,3   | 0,696227639 |
| Pdp2       | -0,22 | 0,770347758 | -0,26 | 0,725904452 | 0,52  | 0,648771384 | -0,31 | 0,409576257 | -0,08 | 0,928440813 |
| Pdpk1      | 0,02  | 0,978017159 | 0,16  | 0,783487161 | 0,13  | 0,856046789 | -0,46 | 0,154035701 | -0,15 | 0,821140509 |
| Pdpn       | 0,09  | 0,963914207 | -0,07 | 0,956504634 | 0,15  | 0,938864861 | -1,36 | 0,089879955 | -1    | 0,047245067 |
| Pdpr       | -1,07 | 0,170739091 | -0,56 | 0,644818618 | -0,26 | 0,809137779 | -0,7  | 0,178343189 | -0,94 | 0,060776571 |
| Pdrg1      | -0,38 | 0,582798732 | -0,28 | 0,469830103 | -0,32 | 0,791940256 | 0,4   | 0,62296101  | 0,26  | 0,847001197 |
| Pds5a      | -0,39 | 0,345084919 | -0,34 | 0,426088176 | 0,2   | 0,727262258 | 0,32  | 0,330407596 | 0,19  | 0,746586635 |
| Pds5b      | 0,18  | 0,825308689 | 0,15  | 0,763796207 | -0,07 | 0,960677449 | -0,1  | 0,914017103 | 0,45  | 0,559658892 |
| Pdss1      | -0,26 | 0,79249191  | 0,09  | 0,904698551 | -0,22 | 0,823823322 | 0,56  | 0,258525095 | 1,35  | 0,05100134  |
| Pdss2      | -0,31 | 0,678055716 | -0,39 | 0,622161495 | 0,34  | 0,727548313 | 0,42  | 0,579663223 | -0,28 | 0,735796038 |
| Pdx1       | -0,19 | 0,673291416 | 0,15  | 0,900801202 | -0,39 | 0,613496662 | 0,09  | 0,873221641 | 0,08  | 0,940438527 |
| Pdxdc1     | -0,5  | 0,489766805 | 0,02  | 0,99305294  | -0,34 | 0,569950993 | 0,24  | 0,544562036 | -0,12 | 0,888182112 |
| Pdxk       | -0,39 | 0,764288636 | 0,04  | 0,972706967 | 0,38  | 0,830336321 | -1,54 | 0,054596372 | -0,81 | 0,501344315 |
| Pdxk-ps    | 0,14  | 0,906365323 | -0,23 | 0,527716421 | 0,14  | 0,929155794 | 0,04  | 0,922433376 | -0,21 | 0,702558142 |
| Pd xp      | -0,15 | 0,80309313  | 0,26  | 0,535229346 | 0,09  | 0,922318683 | -0,04 | 0,949239972 | -0,04 | 0,973576804 |
| Pdyn       | 0,08  | 0,940758951 | -0,07 | 0,943782735 | -0,59 | 0,259550802 | 0,43  | 0,62296101  | 0,36  | 0,669861917 |
| Pd zd11    | -0,04 | 0,965991176 | 0,34  | 0,559617305 | -0,05 | 0,942486989 | 0,23  | 0,689625845 | 0,06  | 0,943231038 |
| Pd zd2     | -0,19 | 0,698231814 | -0,01 | 0,9957438   | -0,38 | 0,662451176 | -0,48 | 0,380029536 | -0,39 | 0,459055099 |
| Pd zd3     | -0,09 | 0,902628825 | 0,21  | 0,719281503 | -0,05 | 0,953917674 | -0,02 | 0,987977078 | 0,13  | 0,919867638 |
| Pd zd4     | 0,06  | 0,965482773 | -0,4  | 0,346218909 | 0,25  | 0,615286789 | -0,44 | 0,222186856 | -0,31 | 0,726042963 |
| Pd zd7     | 0,05  | 0,958188047 | -0,12 | 0,908953517 | 0,45  | 0,27041915  | 0,15  | 0,716228493 | 0,16  | 0,841522773 |
| Pd zd8     | -0,25 | 0,792735264 | 0,28  | 0,651587568 | 0,42  | 0,483761569 | -0,39 | 0,494392613 | 0,24  | 0,707524705 |
| Pd zd9     | 0,37  | 0,580512951 | 0,07  | 0,947664606 | -0,18 | 0,756274956 | 0,09  | 0,833013516 | -0,23 | 0,692784012 |
| Pd zk1     | -0,07 | 0,944652244 | -0,19 | 0,643743213 | -0,32 | 0,759399009 | -0,19 | 0,77372709  | -0,09 | 0,934295152 |
| Pd zk1 ip1 | 0,37  | 0,522356385 | -0,74 | 0,418418761 | 0,11  | 0,93127773  | -0,08 | 0,927769605 | 0,3   | 0,684349871 |
| Pd zph1    | 0,15  | 0,849571502 | 0     | 1           | 0,41  | 0,485917439 | 0,17  | 0,801091541 | 0,22  | 0,826206511 |
| Pd zrn3    | -0,09 | 0,922341271 | 0,11  | 0,80192513  | 0,01  | 0,997268369 | 0,07  | 0,897576959 | -0,26 | 0,677222415 |
| Pd zrn4    | -0,03 | 0,978853388 | -0,26 | 0,670859269 | -0,2  | 0,857466061 | 0,03  | 0,986773564 | 0,17  | 0,913553402 |
| Pea15a     | -0,39 | 0,344319101 | -0,25 | 0,585443341 | 0,35  | 0,435556279 | -0,23 | 0,516518125 | -0,38 | 0,435557005 |
| Pea15b     | 0,14  | 0,805313174 | 0,16  | 0,737997126 | 0,02  | 0,978554254 | -0,03 | 0,953420981 | 0,17  | 0,817121002 |
| Peak1      | 0,08  | 0,89763852  | -0,26 | 0,753873417 | 0,03  | 0,968170822 | -0,07 | 0,920767405 | -0,14 | 0,859663155 |
| Peak1 os   | -0,28 | 0,580784638 | 0,18  | 0,882918801 | 0,05  | 0,948712735 | 0,03  | 0,971338071 | -0,2  | 0,816729947 |

|        |       |             |       |             |       |             |       |             |       |             |
|--------|-------|-------------|-------|-------------|-------|-------------|-------|-------------|-------|-------------|
| Pear1  | -0,54 | 0,379999787 | -0,17 | 0,808222835 | 0,59  | 0,260200895 | 0,34  | 0,334023058 | -0,37 | 0,423787085 |
| Pebp1  | -0,02 | 0,975949545 | -0,18 | 0,698123092 | -0,13 | 0,822852885 | 0,01  | 0,988205241 | 0     | 0,996410895 |
| Pebp4  | 0,12  | 0,874688734 | 0,15  | 0,850735633 | 0,14  | 0,874730424 | -0,29 | 0,428028856 | -0,26 | 0,673577848 |
| Pecam1 | -0,22 | 0,575392972 | -0,22 | 0,559315429 | 0,19  | 0,719805454 | 0,04  | 0,921731995 | -0,36 | 0,447019099 |
| Pecr   | -0,32 | 0,698332739 | -0,92 | 0,300755112 | 0,36  | 0,730738549 | 1,3   | 0,044184887 | -0,06 | 0,951471487 |
| Pef1   | 0,42  | 0,561405935 | -0,2  | 0,65814803  | 0,16  | 0,813104232 | 0,27  | 0,507570518 | 0,04  | 0,974495248 |
| Peg10  | -0,45 | 0,189684245 | -0,22 | 0,614530823 | 0,03  | 0,977827235 | 0,3   | 0,56242509  | -0,03 | 0,976743304 |
| Peg12  | -0,1  | 0,886741208 | 0,2   | 0,649611595 | -0,36 | 0,574337761 | 0,05  | 0,934980759 | -0,06 | 0,96738578  |
| Peg13  | -0,84 | 0,05535238  | -0,26 | 0,583246827 | -0,09 | 0,944078985 | -1,42 | 0,056433439 | -0,61 | 0,443943915 |
| Peg3   | -0,69 | 0,479545376 | -0,24 | 0,682614659 | 0,54  | 0,661220717 | -0,27 | 0,394549983 | -0,44 | 0,446960817 |
| Peg3os | -0,57 | 0,597082878 | -0,02 | 0,986782918 | -0,44 | 0,377624172 | 0,14  | 0,752841715 | -0,31 | 0,553405078 |
| Peli1  | 0,5   | 0,493929    | 0,47  | 0,454735704 | 0,7   | 0,471873683 | 0,2   | 0,85301747  | 0,95  | 0,300044377 |
| Peli2  | -0,14 | 0,825308689 | -0,2  | 0,746287129 | 0,06  | 0,943788892 | -0,23 | 0,55776895  | -0,63 | 0,20189387  |
| Peli3  | 0,04  | 0,962030279 | 0,01  | 0,994666786 | -0,01 | 0,997220401 | 0,06  | 0,91980118  | 0,21  | 0,773421155 |
| Pelo   | 0,06  | 0,924139727 | 0,32  | 0,421380859 | -0,02 | 0,988397392 | 0,71  | 0,124879146 | 0,87  | 0,066502011 |
| Pelp1  | -0,37 | 0,37378946  | -0,27 | 0,786124404 | -0,3  | 0,647047222 | 0,61  | 0,353263288 | -0,24 | 0,787304651 |
| Pemt   | -0,59 | 0,449740126 | -0,35 | 0,691944893 | 0,08  | 0,963381531 | 0,85  | 0,033473531 | -0,06 | 0,962525821 |
| Penk   | 0,21  | 0,905083151 | -0,02 | 0,987486015 | 0,1   | 0,904057901 | 0,15  | 0,78476633  | 0,13  | 0,893737959 |
| Peo1   | -0,16 | 0,922118639 | -0,26 | 0,700297886 | 0,24  | 0,843091338 | -0,05 | 0,939298189 | -0,22 | 0,814438115 |
| Pepd   | -0,07 | 0,925626077 | -0,04 | 0,956563498 | -0,22 | 0,82162081  | 0,11  | 0,830816671 | -0,7  | 0,541844974 |
| Per1   | -0,18 | 0,663447662 | 0,3   | 0,649397617 | 0     | 0,997816755 | -0,59 | 0,16321411  | -1,17 | 0,064964067 |
| Per2   | -0,11 | 0,848224885 | 0,23  | 0,77148563  | 0,61  | 0,350654804 | -0,95 | 0,19247613  | -0,38 | 0,708898543 |
| Per3   | -0,09 | 0,898269435 | -0,19 | 0,864363741 | 0,18  | 0,861914066 | -0,37 | 0,608607136 | -0,98 | 0,128620629 |
| Perm1  | 0,63  | 0,29523865  | -0,06 | 0,917223247 | -0,19 | 0,76031147  | 0,49  | 0,580350435 | -0,54 | 0,583434544 |
| Perp   | -0,64 | 0,459127784 | 0,14  | 0,916042399 | 1,65  | 0,080468175 | -0,43 | 0,632939682 | -0,03 | 0,969617491 |
| Pes1   | -0,4  | 0,249044729 | -0,42 | 0,35804906  | 0,69  | 0,379638471 | 0,76  | 0,078411824 | 0,01  | 0,991437885 |
| Pet100 | 0,7   | 0,107723618 | -0,06 | 0,976406273 | -0,47 | 0,532868478 | -0,06 | 0,94809223  | -0,01 | 0,9939542   |
| Pet2   | 0,22  | 0,596655034 | 0,21  | 0,79295936  | 0,12  | 0,857509313 | -0,15 | 0,812468015 | -0,36 | 0,650104155 |
| Pex1   | 0,21  | 0,771117787 | 0,49  | 0,615756725 | 0,17  | 0,867489743 | -0,79 | 0,270537099 | -0,67 | 0,389664866 |
| Pex10  | -0,22 | 0,83598976  | 0,58  | 0,58591598  | 1,06  | 0,18906565  | -0,89 | 0,318746255 | -0,03 | 0,980961333 |
| Pex11a | 0,09  | 0,914180919 | 0,59  | 0,600177044 | 0,31  | 0,783076595 | -1,2  | 0,090583584 | -0,03 | 0,980961333 |
| Pex11b | 0,01  | 0,990162934 | 0,09  | 0,875220537 | -0,32 | 0,598019827 | 0,04  | 0,922275195 | 0,01  | 0,993805868 |
| Pex11g | 0,06  | 0,922118639 | -0,14 | 0,821824162 | -0,23 | 0,661747229 | -0,1  | 0,879866481 | -0,31 | 0,675021583 |
| Pex12  | 0,18  | 0,845495686 | 0,22  | 0,690931701 | 0,07  | 0,950846671 | 0,04  | 0,953222061 | 0,45  | 0,511046303 |
| Pex13  | 0,01  | 0,996219097 | 0     | 0,999210601 | 0,36  | 0,622546805 | -0,05 | 0,941559143 | 0,07  | 0,943231038 |



|        |       |             |       |             |       |             |       |             |       |             |
|--------|-------|-------------|-------|-------------|-------|-------------|-------|-------------|-------|-------------|
| Pex14  | -0,34 | 0,656034838 | -0,03 | 0,969019461 | 0,26  | 0,817818413 | -0,34 | 0,665316336 | -0,17 | 0,9007804   |
| Pex16  | -0,34 | 0,489112201 | -0,25 | 0,715688609 | -0,27 | 0,749607234 | -0,33 | 0,534900061 | -0,42 | 0,480219093 |
| Pex19  | -0,12 | 0,813153742 | -0,35 | 0,443322366 | 0,06  | 0,950121686 | -0,01 | 0,988575767 | -0,47 | 0,378814275 |
| Pex2   | -0,02 | 0,980085387 | -0,09 | 0,85334049  | -0,35 | 0,70397697  | -0,13 | 0,869654466 | 0,52  | 0,574285481 |
| Pex26  | 0,1   | 0,922341271 | 0,1   | 0,907186434 | -0,13 | 0,896231565 | -0,57 | 0,263438608 | -0,55 | 0,518401681 |
| Pex3   | 0,03  | 0,966363948 | -0,26 | 0,588299809 | 0,17  | 0,807815711 | -0,08 | 0,887802522 | -0,28 | 0,663851071 |
| Pex5   | -0,42 | 0,424850399 | -0,32 | 0,668764344 | 0,87  | 0,208091516 | 0,91  | 0,191733901 | -0,34 | 0,697757911 |
| Pex5l  | -0,09 | 0,895278749 | 0,11  | 0,848902314 | 0,31  | 0,582116339 | -0,56 | 0,159009256 | 0     | 0,994659783 |
| Pex6   | -0,2  | 0,793172703 | 0,02  | 0,985764487 | -0,1  | 0,90345282  | -0,24 | 0,647512496 | -0,28 | 0,794840052 |
| Pex7   | -0,74 | 0,454303869 | 1,08  | 0,087315688 | 1,02  | 0,212877741 | -0,8  | 0,548775366 | 0,02  | 0,992694729 |
| Pf4    | 0,52  | 0,17958326  | 0,17  | 0,859954464 | 1,02  | 0,39810038  | 0,4   | 0,446858732 | 1,94  | 0,005608888 |
| Pfas   | -0,68 | 0,158495826 | -0,6  | 0,541469535 | 1,39  | 0,036818657 | 0,28  | 0,679427206 | -0,45 | 0,489004857 |
| Pfdn1  | -0,06 | 0,955200574 | 0,26  | 0,703010486 | 0,54  | 0,397387245 | 0,48  | 0,406031453 | 0,28  | 0,704903041 |
| Pfdn2  | 0,08  | 0,914180919 | -0,37 | 0,35381781  | 0,16  | 0,886000685 | 0,13  | 0,741214227 | -0,15 | 0,853060981 |
| Pfdn4  | -0,14 | 0,741182094 | -0,22 | 0,785573503 | 0,2   | 0,856263477 | 0,94  | 0,160500274 | 0,27  | 0,765419939 |
| Pfdn5  | 0,28  | 0,430373067 | 0,08  | 0,861905894 | 0,03  | 0,969476711 | -0,09 | 0,844919324 | -0,09 | 0,907715372 |
| Pfdn6  | -0,23 | 0,617280733 | -0,19 | 0,666450149 | 0,07  | 0,899913569 | 0,4   | 0,439302156 | 0,01  | 0,994270272 |
| Pfkfb1 | 0,03  | 0,979130815 | 0,35  | 0,752804236 | 0,63  | 0,419251377 | 1,07  | 0,236937742 | 0,28  | 0,802027955 |
| Pfkfb2 | -0,29 | 0,756141549 | 0     | 0,999395995 | 0,25  | 0,785542164 | -0,46 | 0,6447962   | 0,15  | 0,917356423 |
| Pfkfb3 | 1,22  | 0,214430522 | 1,05  | 0,086252622 | -1,53 | 0,068894819 | 0,82  | 0,139144003 | 1,58  | 0,015668823 |
| Pfkfb4 | 0,07  | 0,959466597 | 0,88  | 0,532411047 | 0,29  | 0,847506224 | -0,61 | 0,429743307 | -0,12 | 0,934242963 |
| Pfkl   | -0,39 | 0,512916237 | 0,07  | 0,930061323 | 0,27  | 0,777417583 | 1,1   | 0,022813928 | -0,3  | 0,647175712 |
| Pfkm   | -0,99 | 0,325367378 | -0,65 | 0,365968146 | 0,68  | 0,230491024 | 0,27  | 0,650531076 | -1,52 | 0,05100134  |
| Pfkp   | 0,7   | 0,119534183 | 0,68  | 0,286908359 | -0,25 | 0,858001959 | 1,41  | 0,050236686 | 1,51  | 0,022640911 |
| Pfn1   | -0,21 | 0,606922012 | -0,18 | 0,665804894 | 0,25  | 0,653810439 | 1,08  | 0,022696538 | 0,02  | 0,985300306 |
| Pfn2   | -1,06 | 0,132779189 | 0     | 1           | -0,16 | 0,911634383 | 0,2   | 0,875993251 | -0,42 | 0,752873495 |
| Pfn3   | 0,15  | 0,842678108 | 0,04  | 0,970832543 | -0,24 | 0,637321546 | -0,02 | 0,978782666 | -0,42 | 0,48078342  |
| Pfn4   | -0,04 | 0,969346005 | -0,55 | 0,547180632 | 0,15  | 0,808538071 | -0,48 | 0,398422441 | -0,81 | 0,349150128 |
| Pfpl   | 0,22  | 0,692648542 | 0,19  | 0,838450577 | -0,12 | 0,875089034 | 0,1   | 0,858632076 | -0,08 | 0,918589668 |
| Pga5   | 0,3   | 0,52759289  | 0,1   | 0,937424389 | 0,1   | 0,904057901 | 0,25  | 0,490865019 | 0,17  | 0,757855068 |
| Pgam1  | -0,51 | 0,273887426 | -0,24 | 0,670902144 | 0,23  | 0,715497532 | -0,01 | 0,986768223 | -0,72 | 0,235574745 |
| Pgam2  | -0,09 | 0,892823025 | 0,03  | 0,989873399 | -0,06 | 0,944266382 | -0,07 | 0,922740736 | -0,16 | 0,815693459 |
| Pgam5  | -0,12 | 0,820023436 | -0,15 | 0,758387553 | -0,17 | 0,786634846 | 0,2   | 0,737340657 | -0,03 | 0,978604922 |
| Pgap1  | -0,77 | 0,435472666 | -0,3  | 0,915784454 | 0,94  | 0,476345413 | -0,51 | 0,852596465 | 0,95  | 0,657201901 |
| Pgap2  | -0,33 | 0,389268664 | 0,08  | 0,932918674 | 0,44  | 0,560376292 | -0,29 | 0,713260063 | -0,44 | 0,514506628 |

|         |       |             |       |             |       |             |       |             |       |             |
|---------|-------|-------------|-------|-------------|-------|-------------|-------|-------------|-------|-------------|
| Pgap3   | -0,37 | 0,792392579 | 0,71  | 0,727238755 | 0,54  | 0,480567556 | -0,94 | 0,590475313 | -0,62 | 0,765809384 |
| Pgbd1   | 0,02  | 0,976574175 | 0,08  | 0,958545812 | -0,23 | 0,804434463 | -0,06 | 0,943143586 | -0,54 | 0,290271291 |
| Pgbd5   | -0,13 | 0,867243066 | 0,13  | 0,829839151 | -0,08 | 0,907951869 | -0,02 | 0,987192038 | -0,29 | 0,726042963 |
| Pgc     | 0,47  | 0,278797445 | 0,24  | 0,779951461 | -0,36 | 0,477461651 | -0,22 | 0,720095223 | -0,62 | 0,332430866 |
| Pgd     | -0,5  | 0,25387015  | -0,27 | 0,551072171 | 0,67  | 0,432776468 | 1,27  | 0,0215358   | -0,23 | 0,765419939 |
| Pgf     | 0,52  | 0,374624186 | 0,44  | 0,629816545 | -0,14 | 0,921956183 | 4,86  | 0,004331967 | 0,22  | 0,858526809 |
| Pggt1b  | 0,24  | 0,723296721 | -0,15 | 0,882931058 | 0,03  | 0,984778342 | 0,24  | 0,588987424 | 0,22  | 0,778905098 |
| Pgk1    | 0,3   | 0,421378808 | 0,31  | 0,565603216 | 0,07  | 0,953312137 | 1,95  | 0,019134993 | 0,15  | 0,904836805 |
| Pgk2    | 0,29  | 0,699410601 | -0,33 | 0,532983509 | 0,26  | 0,561271294 | 0,04  | 0,935525116 | -0,06 | 0,941533002 |
| Pgls    | 0,09  | 0,907844906 | -0,04 | 0,971801869 | 0,07  | 0,921956183 | 0,38  | 0,468490835 | -0,01 | 0,991628025 |
| Pglyrp1 | -0,5  | 0,395234755 | -0,61 | 0,333537535 | 0,23  | 0,763286976 | 1,2   | 0,057215016 | -0,63 | 0,265523913 |
| Pglyrp2 | 0,29  | 0,548190621 | 0,42  | 0,486364218 | 0,08  | 0,915321116 | -0,1  | 0,789616492 | -0,36 | 0,59741971  |
| Pglyrp3 | 0,35  | 0,515424069 | 0,15  | 0,812664394 | 0,18  | 0,882373295 | 0,02  | 0,982212444 | -0,01 | 0,991628025 |
| Pglyrp4 | 0,28  | 0,59392946  | 0,33  | 0,70840705  | -0,24 | 0,640264111 | -0,01 | 0,988205241 | -0,04 | 0,96377007  |
| Pgm1    | 0,03  | 0,958821517 | 0,11  | 0,847885195 | 0,04  | 0,95204022  | 0,9   | 0,044384367 | 0,57  | 0,194375834 |
| Pgm2    | 0,29  | 0,522710796 | -0,02 | 0,986535927 | 0,35  | 0,595036513 | 1,74  | 0,013836074 | 0,22  | 0,724432778 |
| Pgm2l1  | -0,78 | 0,087964503 | -0,85 | 0,154882285 | 0,4   | 0,54195729  | 0,98  | 0,092957761 | -0,59 | 0,389726253 |
| Pgm3    | -0,37 | 0,69915722  | -0,63 | 0,264702741 | 1,23  | 0,071154097 | 1,58  | 0,081314504 | 0,11  | 0,94480601  |
| Pgm5    | -0,2  | 0,874642503 | 0,53  | 0,678753304 | -0,14 | 0,91291518  | -2,51 | 0,009134568 | -0,43 | 0,724372612 |
| Pgp     | -0,32 | 0,586458491 | -0,72 | 0,323278688 | 0,14  | 0,862628091 | 0,7   | 0,091159146 | 0     | 0,998748098 |
| Pgpep1  | -0,11 | 0,844688163 | -0,39 | 0,437942228 | 0,17  | 0,737241227 | -0,19 | 0,676740124 | 0,17  | 0,825564898 |
| Pgpep1l | 0,27  | 0,564600565 | 0,06  | 0,952498373 | 0,14  | 0,867571963 | -0,28 | 0,69151142  | -0,92 | 0,217512582 |
| Pgr     | 0,26  | 0,59130483  | 0,15  | 0,894571363 | 0,2   | 0,763286976 | -1,24 | 0,035471717 | -0,17 | 0,84701421  |
| Pgr15l  | 0,33  | 0,622436248 | 0,27  | 0,544734699 | -0,3  | 0,599202081 | -0,37 | 0,4272539   | 0,59  | 0,288158558 |
| Pgrmc1  | -0,16 | 0,803737003 | -0,45 | 0,483020336 | 0,3   | 0,709846532 | -0,44 | 0,594574312 | 0,33  | 0,692465607 |
| Pgrmc2  | -0,8  | 0,529626842 | -0,57 | 0,677026666 | 0,22  | 0,894040977 | -0,62 | 0,363397218 | -0,69 | 0,40189401  |
| Pgs1    | 0,65  | 0,09837244  | 0,25  | 0,571014364 | -0,22 | 0,723037215 | 1,13  | 0,129539671 | 1,42  | 0,05100134  |
| Phactr1 | 0,96  | 0,387630675 | 0,59  | 0,311360111 | -0,6  | 0,36121902  | -0,05 | 0,957596559 | 0,9   | 0,128773493 |
| Phactr2 | -0,44 | 0,546449654 | -0,37 | 0,722523151 | -0,1  | 0,925011442 | -0,17 | 0,898285908 | -0,22 | 0,860316223 |
| Phactr3 | 0,16  | 0,808435056 | -0,13 | 0,867762445 | 0,08  | 0,922318683 | 0,11  | 0,851926687 | 0,18  | 0,827150612 |
| Phactr4 | 0,07  | 0,874467978 | 0,42  | 0,312630893 | 0,61  | 0,507058256 | 0,04  | 0,967247581 | 0,14  | 0,890957032 |
| Phax    | -0,31 | 0,816710776 | 0,62  | 0,641804702 | 0,24  | 0,873026373 | -0,6  | 0,418849726 | 0,55  | 0,738844505 |
| Phb2    | -0,32 | 0,370503679 | -0,29 | 0,716668427 | 0,58  | 0,322097188 | 0,72  | 0,301663719 | -0,09 | 0,940438527 |
| Phc1    | -0,08 | 0,909262664 | -0,02 | 0,993789602 | 0,18  | 0,928065911 | -0,55 | 0,359229104 | 0,19  | 0,812267164 |
| Phc2    | 0,21  | 0,685826767 | 0,31  | 0,69966978  | 0,03  | 0,973732268 | -0,03 | 0,96875256  | 0,46  | 0,387633714 |

|         |       |             |       |             |       |             |       |             |       |             |
|---------|-------|-------------|-------|-------------|-------|-------------|-------|-------------|-------|-------------|
| Phc3    | 0,16  | 0,788409726 | -0,36 | 0,609791675 | 0,37  | 0,647988621 | -0,58 | 0,165842841 | -0,11 | 0,861506431 |
| Phex    | 0,35  | 0,62872508  | 0,23  | 0,934602811 | -0,1  | 0,950725218 | 0,25  | 0,549139201 | 0,43  | 0,496693032 |
| Phf1    | 0,27  | 0,589124269 | 0,5   | 0,501438027 | -0,33 | 0,566099777 | -2,05 | 0,011041643 | -0,14 | 0,860919132 |
| Phf10   | -0,03 | 0,963914207 | -0,12 | 0,880107273 | 0,22  | 0,836880823 | 0,29  | 0,596892735 | -0,12 | 0,901341817 |
| Phf11a  | 2,09  | 0,037391759 | 2,04  | 0,076118325 | -1,63 | 0,078450603 | -0,42 | 0,48843089  | 1,59  | 0,022079094 |
| Phf11b  | 2,38  | 0,083335073 | 2,18  | 0,043236689 | -2,62 | 0,003653311 | -0,88 | 0,059860685 | 1,73  | 0,005733919 |
| Phf11c  | 1,48  | 0,273887426 | 1,56  | 0,280915078 | -1,22 | 0,260587376 | -0,27 | 0,844668307 | 2,13  | 0,01736358  |
| Phf11d  | 0,71  | 0,321600657 | 0,93  | 0,424175253 | -1,54 | 0,210914225 | -0,32 | 0,605919426 | 1,71  | 0,021468057 |
| Phf12   | -0,05 | 0,959466597 | -0,2  | 0,606999442 | 0,03  | 0,967214231 | -0,1  | 0,825022928 | -0,31 | 0,594109073 |
| Phf13   | -0,36 | 0,632053719 | -0,52 | 0,455482066 | 0,2   | 0,839096222 | 0,12  | 0,920929266 | -0,17 | 0,884244347 |
| Phf14   | -0,87 | 0,263252718 | -0,32 | 0,808942942 | 0,56  | 0,298956409 | 1,03  | 0,189635503 | 0,39  | 0,738784191 |
| Phf19   | -1,22 | 0,074890017 | -0,9  | 0,298168653 | 0,58  | 0,492554729 | 0,89  | 0,309647561 | -0,06 | 0,973428839 |
| Phf2    | -0,27 | 0,551135898 | -0,21 | 0,657762603 | -0,12 | 0,895434884 | -0,5  | 0,133183454 | -0,27 | 0,628171618 |
| Phf20   | 0,06  | 0,947630317 | 0,31  | 0,582741439 | 0,09  | 0,919754592 | 0,11  | 0,887937123 | -0,07 | 0,953297732 |
| Phf20I1 | -0,05 | 0,958535933 | 0,15  | 0,801690086 | 0,15  | 0,896728577 | -0,45 | 0,18311375  | 0,49  | 0,429106643 |
| Phf21a  | 0,1   | 0,934185275 | 0,58  | 0,324862841 | -0,1  | 0,919055276 | -0,25 | 0,671991774 | -0,05 | 0,975986697 |
| Phf21b  | 0,01  | 0,992870273 | -0,22 | 0,750192373 | 0,34  | 0,671208475 | 0,03  | 0,979829655 | -0,06 | 0,959573673 |
| Phf23   | -0,52 | 0,500870793 | 0,32  | 0,664787536 | 0,09  | 0,915321116 | -0,33 | 0,564245683 | 0     | 0,9969305   |
| Phf24   | 0,19  | 0,72696312  | -0,07 | 0,936792848 | -0,33 | 0,550662565 | -0,05 | 0,906588327 | -0,2  | 0,732679577 |
| Phf3    | 0,21  | 0,66961506  | 0,25  | 0,782652703 | 0,07  | 0,936059691 | -0,17 | 0,721603753 | 0,04  | 0,955654991 |
| Phf5a   | -0,16 | 0,858551645 | -0,03 | 0,989873399 | -0,09 | 0,94272403  | 0,51  | 0,311539415 | 0,12  | 0,899196564 |
| Phf6    | 0,33  | 0,818182081 | -0,28 | 0,668831101 | 0,6   | 0,508055997 | -0,01 | 0,998303607 | 0,75  | 0,381120683 |
| Phf7    | -0,36 | 0,480085261 | 0,54  | 0,56691167  | 0,12  | 0,846975965 | -0,48 | 0,461824013 | -0,36 | 0,628728585 |
| Phf8    | -0,26 | 0,797024882 | 0,14  | 0,912773944 | -0,16 | 0,846689137 | -0,31 | 0,594574312 | -0,03 | 0,979456872 |
| Phgr1   | -0,02 | 0,985104139 | -0,17 | 0,883093763 | 0,26  | 0,714346477 | 0,55  | 0,359060095 | -0,06 | 0,955499131 |
| Phip    | 0,16  | 0,795659022 | 0,63  | 0,459417799 | 0,1   | 0,922318683 | -0,25 | 0,804778254 | 0,76  | 0,296825623 |
| Phka1   | -0,13 | 0,90742841  | -0,03 | 0,966717367 | 0,22  | 0,802635544 | 0,3   | 0,661083704 | -0,05 | 0,970571301 |
| Phka2   | -0,77 | 0,083421478 | -0,05 | 0,982124281 | 0,27  | 0,750494072 | -0,54 | 0,296991546 | -0,31 | 0,767285294 |
| Phkb    | -0,35 | 0,663447662 | 0,06  | 0,956849804 | 0,52  | 0,497838457 | -0,02 | 0,973261665 | -0,17 | 0,876418697 |
| Phkg1   | 0,13  | 0,875761483 | 0,31  | 0,756584634 | 0     | 0,997439771 | -0,42 | 0,682070739 | 0,13  | 0,954316248 |
| Phkg2   | -0,19 | 0,754698324 | 0,16  | 0,765325717 | -0,15 | 0,862166637 | -0,1  | 0,890998042 | 0,07  | 0,951072994 |
| Phlda1  | 0,34  | 0,631688937 | 0,52  | 0,565159043 | 0,13  | 0,884898822 | -1,28 | 0,013802165 | 0,22  | 0,816435488 |
| Phlda2  | 0,07  | 0,956834067 | -0,05 | 0,932292974 | 1,58  | 0,081771118 | -0,06 | 0,920094781 | 0,21  | 0,758052028 |
| Phlda3  | -0,33 | 0,447658214 | -0,46 | 0,508633526 | 0,68  | 0,336142422 | 0,92  | 0,08259808  | -0,28 | 0,674843991 |
| Phldb1  | 0,07  | 0,964154899 | -0,39 | 0,750704279 | 0,22  | 0,887769873 | 0,79  | 0,27730032  | -0,32 | 0,641928139 |

|          |       |             |       |             |       |             |       |             |       |             |
|----------|-------|-------------|-------|-------------|-------|-------------|-------|-------------|-------|-------------|
| Phldb2   | -0,75 | 0,247531815 | -0,25 | 0,541301427 | 0,62  | 0,19907753  | 0,51  | 0,385593155 | -0,05 | 0,96862593  |
| Phldb3   | -0,05 | 0,95290436  | -0,27 | 0,600177044 | -0,01 | 0,993379272 | 0,08  | 0,903620036 | -0,01 | 0,992022739 |
| Phlpp1   | 0,53  | 0,15490509  | -0,31 | 0,451454512 | 0,37  | 0,659555232 | -0,57 | 0,104747217 | -0,54 | 0,214628523 |
| Phlpp2   | -0,36 | 0,39120208  | -0,08 | 0,935329426 | 0,38  | 0,695306228 | -0,39 | 0,441817444 | 0,45  | 0,462558109 |
| Phospho1 | 0,17  | 0,900302713 | 0,21  | 0,902847035 | -0,88 | 0,224747376 | -1,64 | 0,077995751 | -0,59 | 0,529853591 |
| Phospho2 | 0,57  | 0,469692532 | 0,6   | 0,465184328 | 0,52  | 0,446493846 | -1,37 | 0,233029034 | -0,73 | 0,60268043  |
| Phox2a   | 0,03  | 0,963738499 | 0,04  | 0,945143056 | -0,04 | 0,960666071 | -0,04 | 0,956304274 | -0,18 | 0,793839436 |
| Phox2b   | 0,05  | 0,945042239 | -0,52 | 0,514228058 | 0,1   | 0,925195648 | 0,4   | 0,447310044 | -0,18 | 0,860877067 |
| Phpt1    | -0,22 | 0,619165619 | -0,26 | 0,786394409 | 0,64  | 0,293657374 | -0,04 | 0,947809027 | -0,05 | 0,953297732 |
| Phrf1    | 0,2   | 0,68504244  | 0,22  | 0,716661568 | -0,11 | 0,95204022  | 0,12  | 0,871321071 | 0,01  | 0,995043594 |
| Phtf1    | -0,18 | 0,743593944 | -0,19 | 0,895304965 | 0,39  | 0,77115153  | 0,69  | 0,453295658 | -0,39 | 0,7793502   |
| Phtf1os  | 0,14  | 0,810879711 | -0,02 | 0,967833514 | -0,11 | 0,881924837 | 0,25  | 0,439302156 | -0,13 | 0,912683275 |
| Phtf2    | -0,05 | 0,94913976  | -0,15 | 0,902148738 | 0,05  | 0,982305856 | -0,21 | 0,638148039 | 0,2   | 0,771954227 |
| Phxr1    | 0,15  | 0,766575514 | -0,79 | 0,224997739 | 0,39  | 0,632676478 | 0,42  | 0,542946595 | 0,45  | 0,619409536 |
| Phxr2    | 0     | 0,999042849 | -0,03 | 0,965206586 | -0,19 | 0,683917899 | -0,17 | 0,647512496 | -0,03 | 0,980932608 |
| Phxr4    | 0,88  | 0,239601221 | -0,1  | 0,896065393 | -0,14 | 0,947881687 | 0,35  | 0,675727528 | 0,99  | 0,419557334 |
| Phyh     | -0,03 | 0,976451684 | 0,42  | 0,457889449 | -0,01 | 0,99407001  | -0,73 | 0,048470627 | 0,12  | 0,848530572 |
| Phyhd1   | -0,29 | 0,829838991 | 0,03  | 0,981914565 | 0,13  | 0,928438649 | -0,44 | 0,357385153 | -0,25 | 0,728578071 |
| Phyhip   | -0,06 | 0,950897622 | -0,05 | 0,947684955 | 0,28  | 0,654328013 | -0,21 | 0,556413106 | -0,39 | 0,499998316 |
| Phyhipl  | -0,36 | 0,447068257 | -0,59 | 0,614530823 | -0,36 | 0,628818858 | 0,42  | 0,679295468 | -0,47 | 0,480003949 |
| Phykpl   | -0,11 | 0,852431537 | -0,13 | 0,891099    | 0,97  | 0,092842349 | 0,11  | 0,879670655 | -0,23 | 0,698177269 |
| Pi15     | -0,51 | 0,622541886 | 0,17  | 0,783325809 | 0,19  | 0,800162809 | -0,6  | 0,743813271 | 0,14  | 0,95985938  |
| Pi16     | -0,38 | 0,239601221 | -0,22 | 0,720667099 | -0,03 | 0,982648972 | -4,89 | 0,003561179 | -1,42 | 0,045204628 |
| Pi4k2a   | 0,36  | 0,394976971 | 0,31  | 0,436251163 | 0,06  | 0,957152002 | 0,57  | 0,441740032 | -0,14 | 0,904737757 |
| Pi4k2b   | 0,32  | 0,636937874 | -0,29 | 0,73114289  | 0,48  | 0,503650142 | 1,12  | 0,355552563 | -0,5  | 0,709010136 |
| Pi4ka    | 0     | 0,999288019 | 0,19  | 0,626130765 | 0,23  | 0,714346477 | 0,25  | 0,706619788 | 0,35  | 0,712968816 |
| Pi4kb    | -0,34 | 0,442925166 | 0,38  | 0,458770201 | -0,14 | 0,777918093 | -0,2  | 0,574496617 | -0,42 | 0,442929147 |
| Pianp    | -0,17 | 0,770629412 | -0,01 | 0,996113371 | 0,11  | 0,880706627 | -0,24 | 0,651882106 | -0,18 | 0,865258929 |
| Pias1    | 0,71  | 0,127439636 | 0,81  | 0,318798133 | -0,15 | 0,873457545 | -1,24 | 0,058564376 | 0,2   | 0,731982784 |
| Pias2    | -0,15 | 0,890811904 | 0,49  | 0,603177136 | -0,28 | 0,640924712 | -0,73 | 0,216466898 | -0,1  | 0,937446198 |
| Pias3    | -0,37 | 0,363930021 | -0,03 | 0,961370411 | -0,36 | 0,521569092 | -0,58 | 0,241162703 | -0,46 | 0,436708262 |
| Pias4    | 0,04  | 0,955394263 | 0,13  | 0,842663656 | -0,01 | 0,993071391 | -0,18 | 0,582544259 | 0,16  | 0,844105751 |
| Pibf1    | 0,07  | 0,946235559 | 0,8   | 0,218601437 | 0,02  | 0,989992757 | -0,7  | 0,284257659 | 0,32  | 0,682139425 |
| Picalm   | 0,02  | 0,978542552 | 0,15  | 0,818597532 | -0,34 | 0,637321546 | 0,01  | 0,981203009 | 0,17  | 0,766519815 |
| Pick1    | -0,67 | 0,513267354 | 0,42  | 0,639167098 | 0,68  | 0,504301089 | -0,97 | 0,103953984 | -0,29 | 0,66476732  |

|         |       |             |       |             |       |             |       |             |       |             |
|---------|-------|-------------|-------|-------------|-------|-------------|-------|-------------|-------|-------------|
| Pid1    | -0,49 | 0,563164645 | -0,34 | 0,699023364 | 0,35  | 0,660920525 | 0     | 0,999054177 | -0,1  | 0,904684159 |
| Pidd1   | -0,37 | 0,381983386 | -0,18 | 0,790350061 | 0,48  | 0,312782676 | 0,42  | 0,267147508 | -0,11 | 0,924766813 |
| Piezo1  | -0,47 | 0,297831681 | -0,44 | 0,300191093 | 0,16  | 0,827522829 | 0,65  | 0,065063652 | -0,41 | 0,348831911 |
| Piezo2  | -0,39 | 0,36631183  | -0,01 | 0,994137877 | 0,43  | 0,435693003 | 1,39  | 0,044016761 | -1,24 | 0,076574892 |
| Pif1    | -0,45 | 0,400980668 | -0,57 | 0,488692084 | 0,42  | 0,534801012 | 0,36  | 0,658075284 | -0,34 | 0,661829904 |
| Pifo    | -0,18 | 0,751456663 | 0,08  | 0,929289366 | 0,06  | 0,925406374 | 0,23  | 0,781621482 | -0,36 | 0,486794487 |
| Piga    | 0,08  | 0,907391935 | 1,07  | 0,093211392 | 0,03  | 0,979791644 | -0,44 | 0,446858732 | 0,29  | 0,77959286  |
| Pigb    | -0,4  | 0,67856001  | 0,07  | 0,969019461 | 0,05  | 0,983917018 | -0,45 | 0,73719503  | -1,01 | 0,355561977 |
| Pigc    | 0,17  | 0,795659022 | -0,49 | 0,499967656 | 0,04  | 0,977827235 | 0,18  | 0,759281029 | 0,07  | 0,953971867 |
| Pigf    | 0,18  | 0,856118781 | -0,54 | 0,4491617   | 0,5   | 0,260200895 | 0,65  | 0,211413419 | -0,24 | 0,875421436 |
| Pigg    | -0,61 | 0,289147039 | -0,19 | 0,82485467  | 1,12  | 0,272570712 | -0,7  | 0,344426203 | -0,37 | 0,744868254 |
| Pigh    | -0,77 | 0,494787323 | -0,6  | 0,684980945 | 0,64  | 0,542398079 | -1,08 | 0,033148792 | -1,25 | 0,161547199 |
| Pigk    | -0,1  | 0,814801401 | 0,55  | 0,35466662  | -0,06 | 0,959622439 | -0,19 | 0,71853109  | -0,38 | 0,521284933 |
| Pigl    | 0,31  | 0,601066205 | 0,46  | 0,308115116 | -0,38 | 0,618146048 | -0,55 | 0,522511755 | 0,02  | 0,989016067 |
| Pigm    | -0,44 | 0,318041432 | -0,59 | 0,195316116 | 0,45  | 0,374610064 | 0,7   | 0,319752455 | -0,69 | 0,442579293 |
| Pign    | 0,05  | 0,962660554 | 0,27  | 0,634424292 | 0,97  | 0,409611548 | 0,04  | 0,974029573 | -0,57 | 0,590396118 |
| Pigo    | -0,26 | 0,812186413 | 0     | 0,999661053 | 0,42  | 0,501664412 | -0,14 | 0,825701103 | -0,32 | 0,615828668 |
| Pigp    | -0,13 | 0,840882072 | 0,2   | 0,764037194 | 0,44  | 0,468674976 | -0,43 | 0,351646843 | -0,03 | 0,973576804 |
| Pigq    | -0,1  | 0,879127832 | -0,23 | 0,755498335 | 0,26  | 0,740396996 | 0,11  | 0,859881709 | -0,47 | 0,471406593 |
| Pigr    | -0,01 | 0,990894139 | 0,04  | 0,978359297 | 0,2   | 0,856416051 | -0,08 | 0,951229436 | -0,13 | 0,915067495 |
| Pigs    | 0,35  | 0,436086286 | -0,56 | 0,406817158 | 0,24  | 0,791876238 | 0,04  | 0,967866794 | -1,04 | 0,104257693 |
| Pigt    | -0,36 | 0,374743123 | -0,44 | 0,383563451 | 0,32  | 0,618654041 | 0,29  | 0,341781489 | -0,6  | 0,169601895 |
| Pigu    | -0,13 | 0,848284975 | -0,24 | 0,672509572 | 0,75  | 0,578938863 | 0,12  | 0,831151724 | -0,28 | 0,662029815 |
| Pigv    | -0,06 | 0,966775766 | -0,23 | 0,790350061 | 0,5   | 0,22657669  | -0,8  | 0,152332015 | -0,28 | 0,768884521 |
| Pigw    | -0,6  | 0,318333634 | -0,29 | 0,75247655  | -0,14 | 0,863701276 | 0,58  | 0,124976338 | -0,49 | 0,635418734 |
| Pigx    | 0,31  | 0,595245851 | -0,49 | 0,459231649 | 0,53  | 0,584463665 | 0,6   | 0,082726442 | -0,94 | 0,132625512 |
| Pigyl   | -0,03 | 0,967277212 | -0,39 | 0,695488202 | 0,79  | 0,068894819 | -0,07 | 0,963752888 | -0,45 | 0,628274636 |
| Pigz    | 0,16  | 0,758067417 | 0,05  | 0,930192503 | 0,02  | 0,991568687 | 0,18  | 0,603439118 | 0     | 0,994274908 |
| Pih1d1  | -0,13 | 0,829299665 | -0,07 | 0,930192503 | 0,3   | 0,904573436 | -0,27 | 0,461348633 | -0,56 | 0,262187448 |
| Pih1d2  | 0,35  | 0,726696996 | 0,65  | 0,709008929 | 0,96  | 0,169673614 | -0,51 | 0,665573651 | 0,12  | 0,906189244 |
| Pih1d3  | -0,18 | 0,747914748 | -0,16 | 0,788987411 | -0,07 | 0,935190533 | -0,04 | 0,967866794 | -0,58 | 0,424156608 |
| Pih1h3b | -0,17 | 0,893143496 | -0,43 | 0,540947149 | 0,12  | 0,926779779 | 0,3   | 0,445416558 | -0,13 | 0,885441916 |
| Pik3ap1 | -0,09 | 0,908281692 | -0,47 | 0,39493356  | 0,04  | 0,981207238 | -0,24 | 0,767086207 | 0,56  | 0,533119029 |
| Pik3c2a | 0,35  | 0,301425564 | 0,63  | 0,290322318 | -0,09 | 0,909233941 | 0,29  | 0,6882471   | 0,11  | 0,93417442  |
| Pik3c2b | -0,54 | 0,417617334 | -0,41 | 0,302028989 | 0,67  | 0,329372899 | 0,07  | 0,869704002 | -0,59 | 0,198403657 |

|           |       |             |       |             |       |             |       |             |       |             |
|-----------|-------|-------------|-------|-------------|-------|-------------|-------|-------------|-------|-------------|
| Pik3c2g   | 0     | 0,998307191 | -0,08 | 0,96172404  | -0,03 | 0,986912078 | -0,39 | 0,577464836 | -0,46 | 0,584694999 |
| Pik3c3    | -0,24 | 0,527533759 | 0,16  | 0,839789639 | 0,38  | 0,550190376 | -0,83 | 0,093814809 | 0,13  | 0,850520145 |
| Pik3ca    | -0,22 | 0,778869381 | -0,22 | 0,790958831 | 0,41  | 0,450605545 | 0,43  | 0,324103294 | -0,08 | 0,927454281 |
| Pik3cb    | -0,2  | 0,816710776 | 0,33  | 0,618087796 | -0,1  | 0,940489823 | 0,36  | 0,615181679 | 0,02  | 0,986849867 |
| Pik3cd    | -0,26 | 0,810879711 | 0,31  | 0,798741467 | 0,03  | 0,977967694 | -0,62 | 0,730467863 | 0,49  | 0,806418575 |
| Pik3cg    | 0,59  | 0,413984382 | 0,58  | 0,385935063 | -0,4  | 0,589982818 | 1,37  | 0,047627833 | 0,12  | 0,910249438 |
| Pik3ip1   | -0,49 | 0,578083153 | 1,14  | 0,308914275 | -1,44 | 0,046991491 | -2,58 | 0,004331967 | 0,06  | 0,939448119 |
| Pik3r1    | 0,08  | 0,876019664 | 0,29  | 0,487097639 | 0,06  | 0,946777487 | 0,57  | 0,185404149 | 0,02  | 0,980961333 |
| Pik3r2    | -0,53 | 0,235041275 | -0,28 | 0,706671369 | 0,33  | 0,598179126 | 0,13  | 0,8950324   | -0,49 | 0,585861425 |
| Pik3r3    | -0,4  | 0,358591061 | -0,39 | 0,51915071  | 0,04  | 0,977827235 | -0,13 | 0,831253708 | 0,28  | 0,731527639 |
| Pik3r4    | -0,54 | 0,241021853 | -0,3  | 0,74760299  | 0,52  | 0,190867064 | -0,25 | 0,476414891 | -0,18 | 0,800540569 |
| Pik3r5    | 0,08  | 0,925019201 | 0,09  | 0,902830091 | -0,51 | 0,508853757 | 0,73  | 0,050515292 | -0,29 | 0,601481833 |
| Pik3r6    | -1,24 | 0,203168309 | -0,31 | 0,640299669 | 0,67  | 0,628048897 | -1,08 | 0,018161655 | -0,66 | 0,209473482 |
| Pikfyve   | 0,58  | 0,225326748 | 0,66  | 0,212341437 | -0,05 | 0,956894731 | 0,41  | 0,396662763 | -0,01 | 0,991628025 |
| Pilra     | 0,37  | 0,470455626 | 0,83  | 0,181283332 | 0,28  | 0,807486378 | 0,58  | 0,26838582  | 0,33  | 0,773401088 |
| Pilrb1    | -0,11 | 0,919567534 | -0,2  | 0,888759454 | 0,44  | 0,80210446  | 0,46  | 0,548775366 | -0,1  | 0,939448119 |
| Pilrb2    | -0,88 | 0,360052826 | 0,53  | 0,61590901  | 0,83  | 0,270313252 | -0,35 | 0,811187324 | 0,36  | 0,844105751 |
| Pim1      | 0,41  | 0,36847884  | 0,1   | 0,829238025 | -0,28 | 0,680127367 | 0,41  | 0,308923754 | 0,16  | 0,821140509 |
| Pim2      | 0,15  | 0,898269435 | 0,14  | 0,858935338 | 0,54  | 0,338158262 | -0,46 | 0,500410075 | -0,27 | 0,79952854  |
| Pim3      | 0,29  | 0,511199837 | 0,59  | 0,195316116 | -0,18 | 0,839096222 | -0,6  | 0,1816986   | 0,68  | 0,254886057 |
| Pin1      | -0,15 | 0,774822327 | 0,35  | 0,498607981 | 0,08  | 0,923350407 | -0,35 | 0,451950778 | -0,13 | 0,884248437 |
| Pin1rt1   | -0,4  | 0,38910431  | -0,09 | 0,828818891 | -0,03 | 0,970969012 | -0,14 | 0,686521503 | 0,1   | 0,881613493 |
| Pin4      | -0,03 | 0,965116762 | -0,03 | 0,973043968 | 0,2   | 0,780285009 | 0,56  | 0,321184055 | 0,27  | 0,702558142 |
| Pinc      | 0,3   | 0,589327047 | -0,3  | 0,641792237 | -0,41 | 0,329525512 | -0,3  | 0,357261043 | -0,22 | 0,765809384 |
| Pink1     | -0,25 | 0,619127292 | -0,03 | 0,976014625 | -0,17 | 0,882540073 | 0,21  | 0,807985473 | 0,17  | 0,872242794 |
| Pinlyp    | -0,19 | 0,75201912  | 0,44  | 0,311538299 | -0,12 | 0,867589536 | -0,31 | 0,447060315 | 0,55  | 0,339734906 |
| Pinx1     | -0,18 | 0,805059925 | -0,09 | 0,859954464 | 0,34  | 0,683285574 | 0,72  | 0,312458821 | 0,17  | 0,884248437 |
| Pip       | 0,19  | 0,822107047 | -0,08 | 0,909079807 | 0,04  | 0,950846671 | 0,07  | 0,893609448 | -0,13 | 0,841522773 |
| Pip4k2a   | -0,6  | 0,353836731 | -0,34 | 0,458898493 | 0,42  | 0,539159914 | -0,79 | 0,121231601 | -0,5  | 0,376217331 |
| Pip4k2b   | -0,56 | 0,560461791 | 0,02  | 0,993789602 | -0,3  | 0,777417583 | 1,07  | 0,09021109  | -0,35 | 0,682134021 |
| Pip4k2c   | -0,06 | 0,940758951 | 0,05  | 0,97875059  | 0,65  | 0,377624172 | -0,83 | 0,085065241 | -0,38 | 0,69108787  |
| Pip5k1a   | -0,19 | 0,735860437 | 0,08  | 0,892896673 | 0,06  | 0,941627748 | 0,57  | 0,120895967 | -0,32 | 0,626176831 |
| Pip5k1b   | -0,13 | 0,903666411 | -0,15 | 0,821227978 | -0,17 | 0,929155794 | -4,16 | 0,007919254 | -0,46 | 0,626176831 |
| Pip5k1bos | 0,45  | 0,214430522 | 0,26  | 0,635138707 | -0,07 | 0,90283613  | -0,14 | 0,720329719 | -0,05 | 0,956610289 |
| Pip5k1c   | -0,53 | 0,263813845 | -0,66 | 0,363748564 | -0,1  | 0,901816517 | -0,23 | 0,736704521 | -0,8  | 0,192994246 |

|            |       |             |       |             |       |             |       |             |       |             |
|------------|-------|-------------|-------|-------------|-------|-------------|-------|-------------|-------|-------------|
| Pip5kl1    | 0,04  | 0,969486005 | -0,07 | 0,927073711 | 0,35  | 0,516782079 | -0,16 | 0,820797279 | -0,23 | 0,750470312 |
| Pipox      | 0,41  | 0,496123406 | 0,25  | 0,581931436 | -0,74 | 0,197403139 | -1,63 | 0,018915917 | -0,21 | 0,825697364 |
| Pir        | -0,41 | 0,515424069 | -0,28 | 0,709008929 | 0,2   | 0,85092959  | -0,57 | 0,220214825 | 0,03  | 0,97425848  |
| Pirb       | -0,1  | 0,909304056 | -0,14 | 0,867834749 | -0,23 | 0,867571963 | 0,45  | 0,601175331 | 0,02  | 0,991206114 |
| Pirt       | 0,61  | 0,503825171 | 0,28  | 0,775155136 | -0,23 | 0,751201307 | -0,19 | 0,820745707 | 0,19  | 0,864415219 |
| Pisd       | 0,11  | 0,840727772 | -0,2  | 0,678535718 | 0,33  | 0,640255696 | 0,69  | 0,177192888 | -0,14 | 0,872417427 |
| Pisd-ps1   | -0,26 | 0,617942123 | 0,02  | 0,976423495 | 0,02  | 0,991426402 | -0,03 | 0,966701307 | 0,01  | 0,990633766 |
| Pisd-ps2   | 0,38  | 0,355779967 | 0,93  | 0,277253387 | -1,9  | 0,226116574 | -0,08 | 0,979149858 | -0,28 | 0,927536545 |
| Pisd-ps3   | 0,48  | 0,235475031 | 0,21  | 0,706028548 | -0,63 | 0,212291286 | -1,3  | 0,031245597 | -0,42 | 0,490950217 |
| Pithd1     | 0,3   | 0,551155038 | -0,18 | 0,900801202 | -0,01 | 0,993935103 | -0,06 | 0,973927614 | -0,16 | 0,932108274 |
| Pitpna     | -0,18 | 0,701624105 | -0,24 | 0,645950583 | -0,03 | 0,982648972 | 0,12  | 0,808330986 | 0,1   | 0,894623317 |
| Pitpnb     | -0,13 | 0,782876517 | -0,22 | 0,707806354 | 0,34  | 0,500343254 | 0,07  | 0,906804259 | 0,03  | 0,979392852 |
| Pitpnc1    | -0,48 | 0,242446083 | -0,27 | 0,531187764 | -0,1  | 0,906097666 | -0,69 | 0,235551671 | -0,23 | 0,765565207 |
| Pitpnm1    | -0,23 | 0,712165686 | -0,15 | 0,858860016 | 0,29  | 0,683288161 | -0,2  | 0,710688722 | -0,08 | 0,92489713  |
| Pitpnm2    | -0,56 | 0,249044729 | -0,31 | 0,703291096 | -0,33 | 0,526901752 | -0,56 | 0,353241029 | -0,6  | 0,42105078  |
| Pitpnm2os1 | 0,22  | 0,7494877   | 0,06  | 0,932292974 | 0,07  | 0,952104131 | 0,06  | 0,921423877 | -0,44 | 0,623524521 |
| Pitpnm3    | -0,29 | 0,62352322  | 0,23  | 0,83754738  | -0,3  | 0,780019254 | -2,23 | 0,006048812 | -0,25 | 0,75897118  |
| Pitrm1     | -0,33 | 0,494679097 | -0,47 | 0,359450941 | 0,46  | 0,330525651 | 0,82  | 0,051749824 | -0,1  | 0,924271573 |
| Pitx1      | -0,2  | 0,67368582  | -0,08 | 0,912604822 | -0,18 | 0,777918093 | 0,04  | 0,95852873  | -0,22 | 0,706875815 |
| Pitx2      | -0,3  | 0,69770522  | -0,19 | 0,766425161 | 0,18  | 0,842406348 | 0,18  | 0,780675133 | -0,04 | 0,971058066 |
| Pitx3      | 0,17  | 0,826457489 | -0,05 | 0,954324398 | -0,11 | 0,894866237 | -0,28 | 0,761279044 | 0,12  | 0,931519966 |
| Piwil1     | -0,1  | 0,828837975 | -0,21 | 0,674468926 | -0,29 | 0,707447086 | 0,54  | 0,124305622 | 0,1   | 0,887859063 |
| Piwil2     | 0,53  | 0,526406128 | 0,06  | 0,966078321 | -0,25 | 0,76370647  | 0,56  | 0,511016709 | 0,4   | 0,666758661 |
| Piwil4     | 0,04  | 0,963228289 | -0,52 | 0,557560036 | 0,03  | 0,979822436 | 0,17  | 0,744107161 | -0,3  | 0,657201901 |
| Pja1       | -0,3  | 0,617280733 | -0,48 | 0,574343122 | -0,28 | 0,689298982 | 0,46  | 0,334023058 | -0,04 | 0,979392852 |
| Pja2       | -0,3  | 0,664456582 | -0,18 | 0,825192868 | 0,38  | 0,609393132 | 0,05  | 0,917515731 | 0,11  | 0,877669996 |
| Pkd1       | -0,32 | 0,55427861  | -0,19 | 0,64821339  | 0,4   | 0,453294355 | -0,07 | 0,848707683 | -0,3  | 0,640616198 |
| Pkd1l1     | 0,2   | 0,657498317 | -0,12 | 0,937424389 | -0,16 | 0,870377336 | -0,77 | 0,376631277 | 0,05  | 0,975986697 |
| Pkd1l2     | 0,12  | 0,877610332 | -0,37 | 0,480808447 | -0,26 | 0,707571856 | 0,3   | 0,55856048  | 0,08  | 0,934344891 |
| Pkd1l3     | -0,3  | 0,71214723  | -0,01 | 0,997661526 | -0,16 | 0,874098993 | 0,59  | 0,364626182 | 0,09  | 0,933088525 |
| Pkd2       | -0,08 | 0,901227658 | -0,08 | 0,957247462 | 0,48  | 0,36401558  | -0,11 | 0,918182274 | -0,49 | 0,498553997 |
| Pkd2l1     | 0,21  | 0,708266713 | -0,2  | 0,689924866 | -0,2  | 0,777810365 | 0,47  | 0,287553923 | 0,34  | 0,541844974 |
| Pkd2l2     | -0,19 | 0,79795086  | 0,23  | 0,666450149 | -0,27 | 0,777810365 | -0,28 | 0,750027633 | -0,17 | 0,886027227 |
| Pkdcc      | -0,08 | 0,919758492 | -0,06 | 0,950917235 | -0,12 | 0,878449636 | 0,15  | 0,671576377 | -0,2  | 0,848977077 |
| Pkdrej     | 0,06  | 0,934276267 | -0,11 | 0,786394409 | -0,41 | 0,418524099 | 0,14  | 0,691668858 | -0,04 | 0,961406182 |

|           |       |             |       |             |       |             |       |             |       |             |
|-----------|-------|-------------|-------|-------------|-------|-------------|-------|-------------|-------|-------------|
| Pkhd1     | 0,56  | 0,153132474 | -0,13 | 0,878885226 | -0,15 | 0,874098993 | 0,28  | 0,499512231 | 0,43  | 0,593298551 |
| Pkhd111   | -0,16 | 0,767196944 | 0,27  | 0,580257061 | 0,13  | 0,90665     | -2,38 | 0,027290024 | -0,87 | 0,360718516 |
| Pkia      | -0,36 | 0,457905777 | 0,58  | 0,362448332 | -0,36 | 0,538676107 | -0,3  | 0,660443663 | -0,41 | 0,634515023 |
| Pkib      | 0     | 0,998927419 | -0,02 | 0,982786635 | -0,11 | 0,905088076 | 0,4   | 0,243285301 | 0,17  | 0,870978345 |
| Pkig      | 0,27  | 0,62872508  | 0,2   | 0,695689103 | -0,18 | 0,782805427 | 0,84  | 0,116863724 | 0,03  | 0,983613958 |
| Pklr      | -0,4  | 0,468471001 | -0,23 | 0,760291843 | -0,01 | 0,993379272 | -0,14 | 0,875254989 | -0,19 | 0,898309858 |
| Pkm       | 0,07  | 0,89763852  | 0,06  | 0,91206541  | 0,02  | 0,980801972 | 1,91  | 0,004704128 | 0,41  | 0,504660722 |
| Pkmyt1    | -0,87 | 0,202131121 | -1,1  | 0,16121328  | 0,83  | 0,138915123 | 0,82  | 0,162415781 | -0,15 | 0,847312006 |
| Pkn1      | -0,45 | 0,412575527 | -0,06 | 0,929289366 | -0,05 | 0,969928932 | 0,08  | 0,882478591 | -0,47 | 0,363127424 |
| Pkn2      | 0,13  | 0,862160773 | 0,42  | 0,314703215 | 0,53  | 0,401629068 | 0,02  | 0,975655831 | 0,33  | 0,64987147  |
| Pkn3      | -0,39 | 0,387629943 | -0,1  | 0,880892852 | -0,2  | 0,780193964 | 0,26  | 0,547396551 | 0,15  | 0,854135221 |
| Pknox1    | -0,07 | 0,956980086 | -0,01 | 0,993221425 | -0,51 | 0,340707231 | 0,14  | 0,881304659 | 0,29  | 0,75509516  |
| Pknox2    | 0,28  | 0,663447662 | 0,11  | 0,922399849 | 0     | 0,999931921 | -0,41 | 0,646776742 | -0,12 | 0,928764431 |
| Pkp1      | 0,14  | 0,899285111 | 0,14  | 0,848902314 | 0,41  | 0,642291177 | 0,17  | 0,835175707 | -0,17 | 0,861977667 |
| Pkp2      | 0,16  | 0,76714951  | -0,3  | 0,613344994 | 0,87  | 0,04780109  | -0,6  | 0,380444012 | -0,22 | 0,825325824 |
| Pkp3      | 0,43  | 0,550072339 | 0,2   | 0,873628464 | 0,59  | 0,578239408 | -0,36 | 0,629628837 | -0,05 | 0,967522546 |
| Pkp4      | -0,29 | 0,683267007 | -0,47 | 0,277089778 | -0,21 | 0,670137495 | 0,18  | 0,784621098 | 0,23  | 0,765419939 |
| Pla1a     | 1,39  | 0,289651467 | 0,73  | 0,456156525 | -1,24 | 0,204247489 | 0,44  | 0,168545971 | 0,44  | 0,624426919 |
| Pla2g10   | 0,07  | 0,90537696  | -0,16 | 0,83456599  | -0,16 | 0,864411302 | 0,36  | 0,45532622  | -0,39 | 0,548871936 |
| Pla2g10os | -0,17 | 0,760872819 | 0,04  | 0,981236932 | -0,48 | 0,574032919 | -0,33 | 0,813792791 | -0,22 | 0,929899117 |
| Pla2g12a  | -0,04 | 0,950532575 | 0,19  | 0,664710351 | 0,18  | 0,790468311 | 0,52  | 0,300673159 | 0,15  | 0,885872093 |
| Pla2g12b  | 0,16  | 0,768809729 | 0,21  | 0,70212029  | 0,13  | 0,886832708 | 0,22  | 0,593039508 | 0,51  | 0,257751018 |
| Pla2g15   | -0,36 | 0,695568501 | -0,31 | 0,577539302 | 0,8   | 0,204247489 | 0,51  | 0,647539037 | -0,22 | 0,912890826 |
| Pla2g16   | 1,14  | 0,132779189 | 0,92  | 0,486104864 | -1,14 | 0,038411212 | -0,53 | 0,425645585 | 0,94  | 0,043727018 |
| Pla2g1b   | -0,16 | 0,761364679 | 0,13  | 0,86198859  | 0,14  | 0,865145801 | 0,32  | 0,387796583 | 0,23  | 0,72187317  |
| Pla2g2a   | 0,42  | 0,518267881 | 0,35  | 0,802940456 | 0,02  | 0,989772079 | -0,11 | 0,871825215 | 0,38  | 0,471919432 |
| Pla2g2c   | -0,22 | 0,717407143 | 0,2   | 0,87189957  | 0,1   | 0,904057901 | 0,14  | 0,891790388 | 0,24  | 0,712121015 |
| Pla2g2d   | -0,03 | 0,966775766 | -0,29 | 0,728434379 | -0,03 | 0,97548193  | 0,63  | 0,456553196 | 0,53  | 0,574285481 |
| Pla2g2e   | -0,68 | 0,412748099 | 0,05  | 0,948314657 | 0,02  | 0,987003605 | 0,07  | 0,926704232 | -0,05 | 0,95587699  |
| Pla2g2f   | -0,14 | 0,844688163 | -0,38 | 0,661976216 | -0,26 | 0,645449124 | 0,62  | 0,44390447  | -0,01 | 0,99476381  |
| Pla2g3    | -0,27 | 0,666546952 | -0,09 | 0,923044405 | -0,1  | 0,914219784 | -0,47 | 0,308570855 | -0,52 | 0,42429328  |
| Pla2g4a   | -0,08 | 0,961784154 | 0,2   | 0,79295936  | 0,01  | 0,993686224 | -3,31 | 0,013836074 | 1,4   | 0,078743502 |
| Pla2g4c   | 0,5   | 0,427486466 | -0,25 | 0,80097084  | 0,18  | 0,876684089 | 0,56  | 0,215653056 | 1,03  | 0,076574892 |
| Pla2g4d   | -0,1  | 0,891986094 | 0,17  | 0,790939978 | -0,43 | 0,404120029 | -0,04 | 0,960944731 | 0,45  | 0,574285481 |
| Pla2g4e   | 0,32  | 0,632511582 | -0,38 | 0,69562011  | -0,27 | 0,770526999 | 0,14  | 0,831764227 | -0,04 | 0,966951657 |



|         |       |             |       |             |       |             |       |             |       |             |
|---------|-------|-------------|-------|-------------|-------|-------------|-------|-------------|-------|-------------|
| Pla2g4f | 0,24  | 0,581953185 | 0,58  | 0,291180284 | 0     | 0,998479656 | -0,46 | 0,294502337 | 0,12  | 0,90197982  |
| Pla2g5  | 0,72  | 0,363597602 | -0,61 | 0,173433171 | -0,18 | 0,857466061 | 0,67  | 0,316697742 | -0,21 | 0,748678485 |
| Pla2g6  | -0,25 | 0,724752858 | -0,33 | 0,677981098 | -0,05 | 0,95136091  | 1,22  | 0,01842722  | -0,3  | 0,608004947 |
| Pla2g7  | 0,22  | 0,800209334 | 0,47  | 0,541301427 | 0,48  | 0,831266864 | -0,84 | 0,499698062 | 0,7   | 0,678111197 |
| Pla2r1  | 0     | 0,997487069 | 0,67  | 0,230688117 | -0,07 | 0,941627748 | -3,04 | 0,009103172 | -0,18 | 0,864373858 |
| Plaa    | -0,32 | 0,735799425 | 0,04  | 0,972651649 | -0,15 | 0,839096359 | 0,41  | 0,468693823 | 0,22  | 0,74590767  |
| Plac1   | -1,04 | 0,048513596 | -1,33 | 0,213265335 | 0,19  | 0,786634846 | 0,55  | 0,467193994 | 0,44  | 0,51509981  |
| Plac8   | 1,05  | 0,337439148 | 0,6   | 0,300718094 | -0,48 | 0,74662944  | -4,23 | 0,002816282 | 1,04  | 0,043727018 |
| Plac8l1 | 0,19  | 0,75259508  | -0,03 | 0,975765252 | 0,03  | 0,976042637 | -0,5  | 0,517354168 | -0,98 | 0,169445573 |
| Plac9a  | -0,46 | 0,74672311  | -0,32 | 0,680709276 | 0,26  | 0,804607903 | -0,57 | 0,764003116 | -0,07 | 0,979456872 |
| Plag1   | -0,56 | 0,652819827 | -0,11 | 0,954823222 | 0,84  | 0,563650445 | -0,73 | 0,712115859 | 0,02  | 0,994174876 |
| Plagl1  | -0,09 | 0,962442672 | 0,04  | 0,990979177 | -0,26 | 0,904406621 | 1,38  | 0,227359898 | 0,43  | 0,818041383 |
| Plagl2  | 0,61  | 0,237786455 | 0,37  | 0,751382934 | -0,43 | 0,516254562 | 0,09  | 0,890879327 | 0,03  | 0,984125319 |
| Plat    | -0,08 | 0,877539178 | -0,32 | 0,439108392 | -0,18 | 0,779428    | -1,77 | 0,019526471 | -0,8  | 0,264122193 |
| Platr10 | -0,15 | 0,786709661 | 0,24  | 0,615209804 | -0,09 | 0,922318683 | 0,2   | 0,730754402 | -0,1  | 0,910085178 |
| Platr14 | 0,42  | 0,438932987 | 0,35  | 0,741888655 | 0,13  | 0,855887253 | -0,39 | 0,685649116 | -0,01 | 0,992607235 |
| Platr17 | 0,7   | 0,296573383 | -0,01 | 0,999661053 | -0,13 | 0,920825845 | 1,5   | 0,040382727 | 0,4   | 0,728483022 |
| Platr20 | 0     | 0,998769353 | 0,24  | 0,670902144 | -0,21 | 0,830685724 | -0,27 | 0,597332937 | 0,09  | 0,918897359 |
| Platr21 | 0,15  | 0,809050839 | -0,24 | 0,721275133 | 0,1   | 0,876593291 | 0,27  | 0,535597404 | 0,58  | 0,193796626 |
| Platr22 | -0,36 | 0,786709661 | 0,62  | 0,774735712 | -0,4  | 0,730738549 | 0,19  | 0,635869722 | 0,84  | 0,445849764 |
| Platr25 | 0,08  | 0,924139727 | -0,36 | 0,723384777 | 0,53  | 0,362792817 | 0,25  | 0,760072887 | -0,22 | 0,766559546 |
| Platr26 | -0,13 | 0,844251633 | 0,1   | 0,899624796 | -0,22 | 0,776419989 | 0,69  | 0,261633287 | 0,52  | 0,505878125 |
| Platr27 | 0,3   | 0,53440815  | 0,21  | 0,644516897 | 0,16  | 0,87734396  | 0,21  | 0,630883271 | -0,17 | 0,846219206 |
| Platr28 | 0,37  | 0,395836686 | 0,14  | 0,894205636 | -0,2  | 0,696910202 | -0,34 | 0,300835943 | -0,28 | 0,651115478 |
| Platr29 | 0,13  | 0,892141122 | 0     | 1           | 0,08  | 0,943788892 | -0,68 | 0,112555893 | 0,06  | 0,962877841 |
| Platr3  | -0,26 | 0,735596307 | 0     | 1           | -0,2  | 0,795445046 | 0,1   | 0,819747319 | 0,12  | 0,932268703 |
| Platr30 | -0,07 | 0,915348445 | -0,12 | 0,811092266 | -0,02 | 0,985326269 | 0,22  | 0,723887166 | 0,14  | 0,89761151  |
| Platr4  | 0,3   | 0,676800971 | -0,14 | 0,757729632 | -0,07 | 0,938714779 | -0,26 | 0,662848818 | -0,01 | 0,992370267 |
| Platr5  | -0,64 | 0,13473547  | -0,78 | 0,138647411 | 0,9   | 0,272465667 | 1,28  | 0,094204582 | 0,33  | 0,723591535 |
| Platr6  | -0,25 | 0,632027377 | -0,16 | 0,829088814 | 0,03  | 0,978012085 | -0,05 | 0,968643827 | -0,11 | 0,944318268 |
| Platr7  | 0,59  | 0,137319524 | 0,29  | 0,619612553 | -0,47 | 0,514700536 | 0,42  | 0,42643403  | 0,71  | 0,276728769 |
| Platr8  | 0,18  | 0,792238061 | 0,45  | 0,602956592 | -0,02 | 0,980815071 | -0,08 | 0,886806548 | -0,01 | 0,990091016 |
| Platr9  | -0,21 | 0,63880179  | 0,06  | 0,910688765 | -0,13 | 0,828424248 | -0,02 | 0,967866794 | -0,05 | 0,961444047 |
| Plau    | -1,21 | 0,048513596 | -0,61 | 0,459417799 | 0,58  | 0,317122702 | 1,07  | 0,07392351  | -1,04 | 0,047253015 |
| Plaur   | 0,35  | 0,35630118  | 0,24  | 0,611386843 | 0,14  | 0,802534871 | -0,18 | 0,759688215 | 0,39  | 0,536952317 |

|         |       |             |       |             |       |             |       |             |       |             |
|---------|-------|-------------|-------|-------------|-------|-------------|-------|-------------|-------|-------------|
| Plb1    | -0,18 | 0,701391957 | -0,05 | 0,940156926 | -0,18 | 0,856263477 | 0,09  | 0,852988425 | -0,03 | 0,975441362 |
| Plbd1   | -0,01 | 0,993728727 | 0,26  | 0,839789639 | 0,62  | 0,523577388 | -0,08 | 0,955584496 | -0,68 | 0,373929884 |
| Plbd2   | 0,02  | 0,980184206 | -0,25 | 0,666450149 | 0,38  | 0,555578702 | 0,04  | 0,967866794 | -0,42 | 0,623037145 |
| Plcb1   | -0,04 | 0,972720447 | 0,1   | 0,891099    | -1,03 | 0,172601112 | 0,14  | 0,785027978 | -0,07 | 0,949751787 |
| Plcb2   | 0,22  | 0,758777374 | 0,13  | 0,851610126 | -0,7  | 0,204247489 | 0,21  | 0,702311689 | 0,1   | 0,927454281 |
| Plcb3   | -0,57 | 0,237911715 | -0,51 | 0,242323765 | 0,17  | 0,722149463 | 0,23  | 0,506119404 | -0,12 | 0,912250982 |
| Plcb4   | -0,06 | 0,940936429 | 0,08  | 0,920933203 | -0,55 | 0,437376681 | 0,43  | 0,413161964 | -0,24 | 0,758810523 |
| Plcd1   | -0,47 | 0,516626659 | -0,11 | 0,898139881 | 0,48  | 0,40547367  | 0,01  | 0,992906132 | -0,53 | 0,331553232 |
| Plcd3   | -0,15 | 0,824036388 | 0,05  | 0,948115189 | 0,19  | 0,795128728 | -0,55 | 0,20496657  | -0,34 | 0,587199571 |
| Plcd4   | 0,17  | 0,767083571 | 0,2   | 0,784841983 | -0,14 | 0,847688308 | 0,24  | 0,645781937 | 0,41  | 0,417370658 |
| Plce1   | -0,58 | 0,660215768 | 0,48  | 0,629493333 | -0,98 | 0,453294355 | -1,53 | 0,078238769 | 0,04  | 0,979456872 |
| Plcg1   | -0,72 | 0,117703653 | -0,14 | 0,790939978 | 0,21  | 0,740579016 | 0,12  | 0,847253572 | -0,76 | 0,197214574 |
| Plcg2   | -0,34 | 0,657124524 | -0,28 | 0,670902144 | 0,12  | 0,923258105 | -2,29 | 0,007670675 | -0,17 | 0,823098095 |
| Plch1   | 0,38  | 0,503482921 | 0,2   | 0,833450181 | 1,02  | 0,293063011 | -0,05 | 0,924167747 | 0,16  | 0,846526184 |
| Plch2   | 0,37  | 0,611764297 | 0,04  | 0,973715143 | 0     | 0,997394645 | -0,03 | 0,963261052 | -0,01 | 0,989470761 |
| Plcl1   | -0,95 | 0,216640338 | -0,69 | 0,614416208 | 0,27  | 0,799503744 | 0,5   | 0,228394411 | 0,34  | 0,614310952 |
| Plcl2   | 0,26  | 0,65875307  | 0,31  | 0,675584117 | -0,21 | 0,763691662 | -0,69 | 0,108133931 | 0,33  | 0,514440952 |
| Plcxd1  | 0,13  | 0,893137556 | -0,15 | 0,859954464 | 0,02  | 0,978012085 | 0,17  | 0,800534461 | 0,06  | 0,952753183 |
| Plcxd2  | 0,1   | 0,86044657  | -0,14 | 0,809200928 | 0,05  | 0,966647226 | 0,23  | 0,687014375 | 0,34  | 0,675958562 |
| Plcxd3  | -0,3  | 0,622436248 | 0,41  | 0,609576972 | -0,35 | 0,415482722 | -0,3  | 0,444591744 | -0,15 | 0,85806566  |
| Plcz1   | 0,06  | 0,914383847 | 0,12  | 0,892869412 | -0,14 | 0,828582667 | -0,2  | 0,747946366 | 0,12  | 0,905842374 |
| Pld1    | -0,73 | 0,149740371 | 0,05  | 0,957659362 | -0,29 | 0,693427704 | 0,59  | 0,376628904 | -0,25 | 0,792305774 |
| Pld2    | -0,23 | 0,619127292 | 0,03  | 0,966717367 | 0,75  | 0,202239836 | 0,33  | 0,488368559 | 0,04  | 0,973817481 |
| Pld3    | 0,07  | 0,918758168 | 0,38  | 0,68442935  | 0,6   | 0,57717258  | -0,36 | 0,573291467 | -0,68 | 0,240119674 |
| Pld4    | -0,11 | 0,953844206 | -0,43 | 0,781665479 | 0,39  | 0,433473329 | 1,42  | 0,173468279 | 0,07  | 0,97425848  |
| Pld5    | 0,02  | 0,97839288  | -0,07 | 0,951374483 | -0,47 | 0,548288344 | -0,27 | 0,823812306 | -0,44 | 0,781777975 |
| Pld6    | -0,14 | 0,808298405 | -0,27 | 0,67951532  | 0,23  | 0,770526999 | -0,12 | 0,799055674 | -0,2  | 0,720432404 |
| Pldi    | 0,11  | 0,841140165 | 0,04  | 0,935329426 | 0,14  | 0,88128606  | -0,03 | 0,957432042 | -0,19 | 0,794130531 |
| Plec    | -0,54 | 0,268287537 | -0,3  | 0,446315327 | 0,28  | 0,72230278  | 0,05  | 0,920640884 | -0,29 | 0,728388857 |
| Plek    | -0,21 | 0,875464288 | 0,24  | 0,784390856 | 0,41  | 0,795128728 | -0,52 | 0,427171447 | 0,08  | 0,952696542 |
| Plek2   | 0,73  | 0,399240334 | 0,64  | 0,591305258 | 1,62  | 0,190808146 | -1,91 | 0,062574017 | 0,1   | 0,946463658 |
| Plekha1 | -0,39 | 0,524729738 | 0,07  | 0,917623085 | 1,46  | 0,03244077  | 0,73  | 0,121406121 | -0,44 | 0,529853591 |
| Plekha2 | 0,77  | 0,410372137 | 1,3   | 0,314703215 | 0,01  | 0,997268369 | -1,39 | 0,124242673 | 0,49  | 0,540089233 |
| Plekha3 | -0,12 | 0,82812629  | -0,58 | 0,314703215 | 0,13  | 0,880706627 | -0,08 | 0,87613802  | -0,42 | 0,414033358 |
| Plekha4 | 0,76  | 0,104092085 | 0,05  | 0,961139695 | 0,24  | 0,81893984  | -0,26 | 0,570640118 | 0,19  | 0,800089812 |

|           |       |             |       |             |       |             |       |             |       |             |
|-----------|-------|-------------|-------|-------------|-------|-------------|-------|-------------|-------|-------------|
| Plekha5   | -0,02 | 0,974976131 | 0,21  | 0,873628464 | -0,13 | 0,893321094 | -0,96 | 0,071511116 | -0,82 | 0,077829955 |
| Plekha6   | -0,12 | 0,909885273 | 0,24  | 0,845663274 | 0,65  | 0,473499244 | -2,03 | 0,093648484 | -1,14 | 0,235574745 |
| Plekha7   | -0,76 | 0,290080288 | -0,41 | 0,690317074 | -0,25 | 0,74860644  | 1,85  | 0,04687876  | 0,54  | 0,413879396 |
| Plekha8   | -0,77 | 0,239601221 | 0,13  | 0,816131136 | -0,06 | 0,971268254 | 0,56  | 0,700603284 | 0,46  | 0,766703448 |
| Plekha1   | 0,26  | 0,780532884 | 0,02  | 0,985291538 | 0,21  | 0,791940256 | -0,76 | 0,526586186 | -0,49 | 0,799596237 |
| Plekha2   | 0,22  | 0,722504009 | 0,51  | 0,341114606 | -0,03 | 0,977897176 | 0,6   | 0,6282575   | 0,41  | 0,768884521 |
| Plekhd1   | 0,83  | 0,185196531 | 0,38  | 0,39525858  | 0,28  | 0,679339536 | -0,36 | 0,476754829 | -0,2  | 0,825697364 |
| Plekhd1os | 0,04  | 0,944999899 | -0,11 | 0,882589938 | 0,02  | 0,97868016  | 0,1   | 0,825017636 | 0,11  | 0,890437686 |
| Plekhd1   | 0,79  | 0,119273911 | 0,59  | 0,219055424 | 0,28  | 0,65528516  | 0,97  | 0,065527079 | 0,82  | 0,091661588 |
| Plekhd2   | -0,31 | 0,714127381 | -0,05 | 0,955302758 | -0,11 | 0,856923247 | -0,31 | 0,497490252 | 0,74  | 0,158709655 |
| Plekhd3   | -0,29 | 0,436759446 | -0,31 | 0,508633526 | -0,39 | 0,691646302 | 0,56  | 0,177469102 | -0,47 | 0,389151645 |
| Plekhd4   | 0,12  | 0,843281288 | 0,01  | 0,994042377 | -0,17 | 0,840284573 | 0,01  | 0,997827705 | -0,34 | 0,725387944 |
| Plekhd5   | -0,37 | 0,479545376 | -1,15 | 0,318798133 | 1,03  | 0,102008087 | 0,41  | 0,733731231 | -1,01 | 0,198832044 |
| Plekhd6   | -0,25 | 0,765464964 | -0,85 | 0,450997698 | 0,05  | 0,971303102 | 0,53  | 0,556095986 | -0,63 | 0,47703811  |
| Plekhd7   | -0,33 | 0,541134637 | -0,37 | 0,457281647 | 0,32  | 0,547368463 | 0,86  | 0,094905894 | -0,65 | 0,395349481 |
| Plekhd8   | 0,12  | 0,782203502 | -0,42 | 0,501438027 | 0,46  | 0,266100636 | -0,23 | 0,644491109 | -0,58 | 0,495149119 |
| Plekhd9   | -0,09 | 0,9231839   | 0,14  | 0,876592964 | 0,53  | 0,490489841 | -0,39 | 0,695515516 | -0,68 | 0,574198136 |
| Plekhd10  | -0,17 | 0,832513798 | 0,34  | 0,750555245 | 0,59  | 0,509350556 | -2,45 | 0,160911751 | 0,43  | 0,854369491 |
| Plekhd11  | -0,06 | 0,935767468 | -0,3  | 0,667684858 | 0,3   | 0,746397133 | -0,5  | 0,331242564 | -0,57 | 0,389664866 |
| Plekhd12  | -0,06 | 0,943538971 | 0,14  | 0,832117565 | 0,47  | 0,602259493 | -0,15 | 0,702311689 | 0,07  | 0,933620916 |
| Plekhd13  | 0,75  | 0,291466937 | 0,46  | 0,568282579 | -0,35 | 0,68845998  | -0,63 | 0,135495554 | 0,35  | 0,556472175 |
| Plekhd14  | -0,02 | 0,969693355 | 0,06  | 0,964471327 | 0,64  | 0,480563404 | -0,99 | 0,108612006 | -0,66 | 0,324618501 |
| Plekhd15  | -0,26 | 0,804254182 | -0,59 | 0,367816638 | 0,17  | 0,857100866 | 0,5   | 0,261422455 | -0,34 | 0,663223378 |
| Plekhd16  | 0,23  | 0,820785667 | 0,73  | 0,409966386 | -0,31 | 0,807486378 | 0,31  | 0,603302092 | -0,1  | 0,925858284 |
| Plekhd17  | -0,65 | 0,180321324 | -0,3  | 0,557141891 | 0,17  | 0,770526999 | 0,09  | 0,866760121 | -0,46 | 0,373699539 |
| Plekhd18  | 0,08  | 0,886068609 | 0,41  | 0,311099792 | -0,44 | 0,399470425 | 0,46  | 0,183385622 | 0,05  | 0,948163009 |
| Plekhd19  | 0,43  | 0,586970138 | 0,09  | 0,949561659 | 0,13  | 0,898000984 | -0,37 | 0,511434915 | -0,28 | 0,797293554 |
| Plekhd20  | 0,15  | 0,932982682 | 0,47  | 0,664787536 | 0,36  | 0,83322073  | -0,58 | 0,434295291 | 0,09  | 0,950558345 |
| Plekhd21  | 1,02  | 0,55640978  | -0,01 | 0,991131565 | -0,1  | 0,941627748 | -0,39 | 0,632710762 | 0,6   | 0,450543672 |
| Plekhd22  | 0,38  | 0,379553763 | -0,1  | 0,904258936 | -0,25 | 0,752157341 | 0,22  | 0,571919285 | 0,26  | 0,783412747 |
| Plekhd23  | 0,22  | 0,761120978 | 0,14  | 0,916730432 | -0,62 | 0,37970041  | -1,39 | 0,108473747 | 0     | 0,999775166 |
| Plekhd24  | 0,24  | 0,765328991 | 0,19  | 0,629493333 | -0,56 | 0,31895631  | 0     | 0,995821993 | 0,02  | 0,983469081 |
| Plekhd25  | 0,56  | 0,165137501 | 0,19  | 0,854940418 | -0,33 | 0,506222058 | 0,27  | 0,598657551 | 0,83  | 0,166595171 |
| Plekhd26  | -0,12 | 0,875046718 | 0,18  | 0,721891716 | 0,66  | 0,221388606 | -0,01 | 0,99017416  | 0     | 0,997374433 |
| Plekhd27  | -0,14 | 0,811215544 | -0,16 | 0,9208542   | -0,36 | 0,584320897 | -0,32 | 0,594574312 | -0,3  | 0,763240477 |

|        |       |             |       |             |       |             |       |             |       |             |
|--------|-------|-------------|-------|-------------|-------|-------------|-------|-------------|-------|-------------|
| Plin5  | 0,36  | 0,361101533 | -0,15 | 0,864890775 | -0,39 | 0,687282207 | -0,26 | 0,521206029 | 0,18  | 0,801939706 |
| Plk1   | -1,86 | 0,109168138 | -1,72 | 0,163815354 | 0,83  | 0,091781479 | 3,31  | 0,009399265 | -0,52 | 0,552131339 |
| Plk2   | -0,66 | 0,156998083 | -0,19 | 0,824372931 | 0,29  | 0,723987482 | 0,18  | 0,702534189 | -0,03 | 0,975441362 |
| Plk3   | 0,35  | 0,613058828 | 0,51  | 0,289402333 | -0,06 | 0,952104131 | -0,69 | 0,08326406  | -0,01 | 0,992406971 |
| Plk4   | -0,51 | 0,704646948 | -0,89 | 0,264702741 | 1,75  | 0,101949467 | 1,93  | 0,019720005 | -1,18 | 0,053419226 |
| Plk5   | 0,06  | 0,92878551  | -0,28 | 0,514781187 | -0,47 | 0,465949919 | 0,3   | 0,343563192 | 0,26  | 0,816435488 |
| PlIp   | 0,04  | 0,972813908 | -0,34 | 0,651611182 | 0,04  | 0,974887915 | -1,61 | 0,221934349 | 0,08  | 0,97683359  |
| PlIn   | -0,07 | 0,936611783 | -0,22 | 0,790939978 | -0,62 | 0,436827113 | -0,04 | 0,949239972 | -0,07 | 0,940878193 |
| Plod1  | -0,01 | 0,990166929 | -0,07 | 0,92585897  | 0,06  | 0,9680319   | 1,02  | 0,039996125 | 0,09  | 0,911850421 |
| Plod2  | 0,88  | 0,154338294 | 0,39  | 0,840864779 | -0,1  | 0,956570063 | 0,06  | 0,971404035 | 0,24  | 0,872665918 |
| Plod3  | 0,45  | 0,328962207 | 0,26  | 0,521714319 | 0,08  | 0,917108186 | 0,69  | 0,150463702 | 0,75  | 0,146550712 |
| Plp1   | 0,16  | 0,873489142 | -0,08 | 0,951768918 | 0,06  | 0,968168854 | -0,11 | 0,829087694 | -0,12 | 0,899196564 |
| Plp2   | -0,16 | 0,687502794 | -0,3  | 0,419795665 | 0,22  | 0,670137495 | 1,6   | 0,007919254 | -0,18 | 0,747614877 |
| Plpp1  | -0,24 | 0,660190536 | -0,52 | 0,229666828 | 0,02  | 0,988373086 | -1,47 | 0,009399265 | -0,17 | 0,779920985 |
| Plpp2  | 0,17  | 0,791021845 | -0,36 | 0,612645853 | 1,71  | 0,127107543 | 3,01  | 0,048593875 | 1,17  | 0,378967925 |
| Plpp3  | -0,31 | 0,412575527 | -0,24 | 0,639133791 | -0,24 | 0,786437147 | -1,56 | 0,008710568 | -0,32 | 0,501644357 |
| Plpp4  | 0,37  | 0,644174496 | -0,04 | 0,955891382 | -0,25 | 0,62943111  | 0,06  | 0,965579587 | 0,27  | 0,848414973 |
| Plpp5  | 0,14  | 0,819634768 | -0,41 | 0,486364218 | 0,48  | 0,555425727 | 0,46  | 0,428246266 | -0,29 | 0,765809384 |
| Plpp6  | -0,11 | 0,831697563 | 0,13  | 0,832117565 | -0,38 | 0,545465016 | -0,63 | 0,392360575 | 0,22  | 0,823098095 |
| Plpp7  | -0,08 | 0,950897622 | -0,03 | 0,972150454 | 0,19  | 0,86101526  | 0,22  | 0,648610964 | 0,04  | 0,971975122 |
| Plppr1 | 0,17  | 0,867025523 | 0,16  | 0,707524747 | 0,08  | 0,932577939 | -0,35 | 0,310584393 | -0,29 | 0,626176831 |
| Plppr2 | -0,32 | 0,714127381 | 0,21  | 0,852563873 | 0,27  | 0,764671707 | 0,01  | 0,995545056 | -0,08 | 0,914176188 |
| Plppr3 | 0,2   | 0,701297763 | -0,24 | 0,609820475 | -0,17 | 0,789204302 | 0,13  | 0,710855553 | -0,19 | 0,729208209 |
| Plppr4 | -0,31 | 0,69153932  | 0,22  | 0,638366221 | -0,17 | 0,7674045   | -0,26 | 0,418317818 | -0,41 | 0,588685273 |
| Plppr5 | 0,19  | 0,698332739 | -0,11 | 0,85154774  | -0,24 | 0,752196529 | -0,79 | 0,461824013 | -0,95 | 0,360726287 |
| Plrg1  | -0,28 | 0,495413345 | 0,16  | 0,81976908  | 0,48  | 0,281512904 | -0,36 | 0,479018218 | -0,13 | 0,877454343 |
| Pls1   | 0,14  | 0,891309235 | 0,23  | 0,843645168 | 1,65  | 0,002978188 | -0,36 | 0,529965498 | 0,26  | 0,850611225 |
| Pls3   | -0,67 | 0,331662071 | 0,11  | 0,853162838 | -0,24 | 0,684455958 | 0,37  | 0,756436475 | 0,65  | 0,586118577 |
| Plscr1 | 0,67  | 0,472378742 | 0,88  | 0,269611189 | -0,42 | 0,688126003 | -1,63 | 0,027401066 | 0,58  | 0,21050749  |
| Plscr2 | 0,41  | 0,277154156 | 0,48  | 0,391122953 | -0,49 | 0,674253263 | -1,55 | 0,032693391 | 0,21  | 0,763240477 |
| Plscr3 | -0,29 | 0,602160482 | 0,19  | 0,773969614 | 0,13  | 0,901410016 | 0,66  | 0,206310992 | 0,41  | 0,493920965 |
| Plscr4 | -0,14 | 0,897717279 | -0,14 | 0,922434913 | 0,98  | 0,190867064 | -2,22 | 0,096554662 | -0,28 | 0,865258929 |
| Plscr5 | 0,03  | 0,97159365  | 0,19  | 0,73623784  | 0     | 0,997268369 | 0,26  | 0,559599448 | 0,02  | 0,981206514 |
| Pltp   | 0,01  | 0,996219097 | -0,03 | 0,981196932 | -0,44 | 0,716276953 | -5,09 | 0,00219426  | -0,54 | 0,298114337 |
| Plvap  | 0,19  | 0,639364854 | -0,2  | 0,756514853 | 0,21  | 0,771729329 | -0,45 | 0,411954534 | -0,04 | 0,976320465 |

|           |       |             |       |             |       |             |       |             |       |             |
|-----------|-------|-------------|-------|-------------|-------|-------------|-------|-------------|-------|-------------|
| Plxdc1    | -0,11 | 0,9231839   | 0,01  | 0,998179747 | 0,23  | 0,86935713  | -1,28 | 0,232695925 | -1,44 | 0,166187239 |
| Plxdc2    | -0,76 | 0,615064142 | 1,22  | 0,103513448 | -0,76 | 0,546176404 | -2,68 | 0,025180579 | -1,11 | 0,240813036 |
| Plxna1    | -0,12 | 0,801169496 | -0,01 | 0,9951682   | 0,06  | 0,944441051 | 0,82  | 0,108801119 | 0,36  | 0,622910734 |
| Plxna2    | -0,4  | 0,307022402 | -0,14 | 0,796482292 | -0,25 | 0,688126003 | -0,07 | 0,87630843  | -0,58 | 0,321255942 |
| Plxna3    | 0,05  | 0,948926586 | -0,16 | 0,878240984 | 0,41  | 0,533172696 | -0,41 | 0,253294027 | 0,04  | 0,96176496  |
| Plxna4    | 0,74  | 0,263583519 | -0,01 | 0,996333613 | -0,27 | 0,505300385 | -0,3  | 0,609105658 | 0,02  | 0,984065984 |
| Plxna4os1 | 0,21  | 0,689253784 | 0     | 0,998513452 | 0,14  | 0,807926482 | -0,05 | 0,947809027 | 0,32  | 0,518659138 |
| Plxna4os2 | 0,03  | 0,973255755 | -0,18 | 0,763796207 | 0,32  | 0,644135796 | 0,65  | 0,161626639 | 0,1   | 0,935493196 |
| Plxnb1    | -0,68 | 0,343457563 | 0,33  | 0,867324954 | 1,38  | 0,031028475 | -0,63 | 0,50659543  | -0,15 | 0,840036408 |
| Plxnb2    | -0,06 | 0,922595433 | -0,02 | 0,985764487 | 0,64  | 0,312665647 | 0,7   | 0,141794466 | -0,53 | 0,455256406 |
| Plxnb3    | 0,02  | 0,984040323 | 0,11  | 0,896187678 | -0,03 | 0,976042637 | -0,19 | 0,716055856 | 0,03  | 0,975441362 |
| Plxnc1    | 0,32  | 0,645057952 | 0,27  | 0,756778611 | -0,15 | 0,892342683 | -0,57 | 0,514962191 | 2,48  | 0,015349051 |
| Plxnd1    | -0,41 | 0,296311229 | -0,33 | 0,568175466 | 0,46  | 0,425721333 | 0,57  | 0,117589332 | -0,49 | 0,253650803 |
| Pm20d1    | -0,03 | 0,96869339  | 0,1   | 0,9369583   | -0,29 | 0,57242912  | 0,12  | 0,887001654 | 0,06  | 0,961406182 |
| Pm20d2    | -0,26 | 0,685740769 | 0,01  | 0,99305294  | -0,29 | 0,514610288 | 0,1   | 0,853419763 | -0,27 | 0,692178867 |
| Pmaip1    | 0,49  | 0,472544689 | 0,93  | 0,318079221 | -0,21 | 0,747599709 | 1,64  | 0,073004326 | 0,56  | 0,617632274 |
| Pmch      | 0,2   | 0,799051387 | 0,33  | 0,61590901  | -0,08 | 0,929871006 | 0,11  | 0,853419763 | 0,06  | 0,939948423 |
| Pmel      | 0,92  | 0,091826925 | 0,23  | 0,803071242 | -0,62 | 0,552795074 | 0,25  | 0,538229097 | 0,07  | 0,935493196 |
| Pmepa1    | 0,24  | 0,534017117 | -0,32 | 0,70212029  | 0,23  | 0,720590502 | 0,86  | 0,172272992 | 0,07  | 0,952971656 |
| Pmf1      | -0,95 | 0,185196531 | -1,91 | 0,083214618 | 0,14  | 0,922318683 | 1,69  | 0,157348775 | -0,3  | 0,885872093 |
| Pmfbp1    | -0,15 | 0,767304889 | -0,36 | 0,610055593 | 0,09  | 0,868590766 | 0,45  | 0,204022294 | 0,07  | 0,939127163 |
| Pmis2     | -0,03 | 0,958512892 | 0,07  | 0,920755087 | 0,17  | 0,72316448  | -0,16 | 0,655334071 | -0,06 | 0,939948423 |
| Pml       | 1,06  | 0,060731662 | 1,16  | 0,109267475 | -1,55 | 0,006900627 | -0,63 | 0,19148971  | 1,04  | 0,048627677 |
| Pmm1      | 0,35  | 0,619769947 | -0,27 | 0,536246395 | 0,31  | 0,660920525 | 0     | 1           | -0,27 | 0,791694696 |
| Pmm2      | -0,32 | 0,586458491 | -0,12 | 0,854580121 | -0,08 | 0,897385829 | 0,39  | 0,612898088 | -0,48 | 0,668747774 |
| Pmp2      | -0,2  | 0,744352714 | 0,51  | 0,619709049 | 0,37  | 0,562334029 | -0,37 | 0,686521503 | -0,11 | 0,946463658 |
| Pmp22     | -0,43 | 0,406117675 | -0,39 | 0,302028989 | 0,13  | 0,860937434 | -1,55 | 0,008655926 | -0,2  | 0,726984366 |
| Pmpca     | -0,24 | 0,687662951 | -0,44 | 0,386622413 | 0,29  | 0,65528516  | 0,77  | 0,049114771 | 0,17  | 0,861056054 |
| Pmpcb     | -0,24 | 0,578691586 | -0,12 | 0,876503933 | 0,04  | 0,972332753 | 0,33  | 0,517273277 | 0,32  | 0,715879151 |
| Pms1      | -0,11 | 0,89785374  | -0,54 | 0,546343368 | 0,51  | 0,631323805 | 0,62  | 0,581261175 | 0,08  | 0,962820357 |
| Pms2      | 0,12  | 0,914090929 | 0,05  | 0,969812452 | 0,03  | 0,983566607 | 0,64  | 0,408389024 | 0,05  | 0,969239137 |
| Pmvk      | -0,24 | 0,546166185 | 0,33  | 0,640299669 | -0,2  | 0,820892001 | 0,11  | 0,900530968 | 0,36  | 0,619978942 |
| Pnck      | -0,05 | 0,961271402 | 0,09  | 0,900801202 | 0,47  | 0,586522241 | 0,32  | 0,429743307 | 0,31  | 0,579657577 |
| Pnlsr     | 0,04  | 0,970597988 | 0,26  | 0,619501651 | -0,6  | 0,433685982 | -0,29 | 0,767568252 | 0,49  | 0,623214829 |
| Pnkd      | -0,78 | 0,296031134 | -0,7  | 0,450538273 | 0,36  | 0,651559391 | 0,26  | 0,690659674 | -1,07 | 0,032750472 |

|          |       |             |       |             |       |             |       |             |       |             |
|----------|-------|-------------|-------|-------------|-------|-------------|-------|-------------|-------|-------------|
| Pnkp     | -0,02 | 0,978334078 | 0,25  | 0,664380401 | 0,14  | 0,852249671 | -0,61 | 0,157348775 | -0,77 | 0,087821391 |
| Pnidc1   | -0,2  | 0,784951771 | -0,5  | 0,220316311 | 0,17  | 0,900945102 | 0,14  | 0,698762924 | 0,22  | 0,728578071 |
| Pnlip    | 0,53  | 0,495523712 | -0,17 | 0,824113739 | -0,3  | 0,628902187 | -0,05 | 0,941161148 | 0,17  | 0,816305974 |
| Pnliprp1 | 0,13  | 0,892882966 | 0,13  | 0,780639887 | -0,22 | 0,660920525 | 0,13  | 0,74524486  | 0,05  | 0,957620856 |
| Pnliprp2 | -0,26 | 0,748867208 | 0,24  | 0,900801202 | -0,21 | 0,705811313 | 0,29  | 0,399678653 | 0,17  | 0,869710279 |
| Pnma1    | -0,07 | 0,9231839   | 0,34  | 0,677026666 | -0,02 | 0,989336214 | -1,27 | 0,028782784 | -0,66 | 0,25297993  |
| Pnma2    | 0,42  | 0,627312744 | -0,22 | 0,82263744  | -0,25 | 0,652919303 | 0,01  | 0,995026901 | -0,24 | 0,73865672  |
| Pnma3    | 0,4   | 0,424529546 | 0,07  | 0,943436096 | -0,04 | 0,953074345 | -0,28 | 0,704798975 | 0,13  | 0,868037689 |
| Pnma5    | 0,36  | 0,446811495 | -0,18 | 0,739060346 | 0,17  | 0,80210446  | -0,1  | 0,82720006  | -0,14 | 0,839474287 |
| Pnmal1   | -0,07 | 0,882681442 | -0,04 | 0,981394744 | 0,13  | 0,909233941 | 0,05  | 0,91189404  | 0,15  | 0,847312006 |
| Pnmal2   | 0,01  | 0,990404752 | 0,05  | 0,94241535  | -0,22 | 0,670594444 | -0,01 | 0,993337409 | -0,18 | 0,779836695 |
| Pnmt     | 0,54  | 0,36240006  | -0,3  | 0,854636598 | -0,2  | 0,851484968 | 0,25  | 0,778817721 | -0,09 | 0,944318268 |
| Pnn      | -0,16 | 0,856118781 | 0,05  | 0,977697653 | 0,73  | 0,430179576 | 0,46  | 0,546441525 | 0,52  | 0,525018839 |
| Pno1     | -0,46 | 0,486661927 | -0,4  | 0,586955568 | -0,16 | 0,819424513 | 1,57  | 0,011234041 | 0,06  | 0,943668392 |
| Pnoc     | 0,41  | 0,294535935 | 0,06  | 0,980073055 | -0,32 | 0,490489841 | 0,24  | 0,553357202 | 0,13  | 0,860908707 |
| Pnp      | 0,35  | 0,855113509 | 0,79  | 0,586775333 | -0,39 | 0,777918093 | -0,6  | 0,586887461 | 0,43  | 0,661883557 |
| Pnp2     | 0,02  | 0,98555838  | 0,09  | 0,91472637  | -0,19 | 0,881951792 | -0,75 | 0,247604143 | -0,26 | 0,766069824 |
| Pnpla1   | 0,09  | 0,918945711 | 0,1   | 0,843162191 | -0,37 | 0,609800212 | -0,5  | 0,196162403 | 0,18  | 0,840952901 |
| Pnpla2   | 0,87  | 0,091826925 | 0,51  | 0,45373941  | -0,75 | 0,15058936  | -0,92 | 0,025393164 | 0,28  | 0,628127128 |
| Pnpla3   | 0,2   | 0,720829271 | -0,13 | 0,826814267 | 0,01  | 0,991071281 | -0,02 | 0,978664724 | -0,26 | 0,705863851 |
| Pnpla5   | 0,21  | 0,715493304 | 0,12  | 0,883631611 | -0,28 | 0,600679499 | 0,23  | 0,768880868 | 0,18  | 0,832781095 |
| Pnpla6   | -0,53 | 0,416909288 | -0,05 | 0,957659362 | -0,27 | 0,783076595 | -0,49 | 0,345619079 | -0,23 | 0,68987325  |
| Pnpla7   | 0,6   | 0,143037124 | 0,08  | 0,919873208 | -0,72 | 0,09059546  | -0,66 | 0,348938015 | -0,41 | 0,626176831 |
| Pnpla8   | 0,02  | 0,976574175 | -0,01 | 0,99804971  | 0,69  | 0,522764246 | -0,53 | 0,454995407 | 0,05  | 0,96832742  |
| Pnpo     | -0,15 | 0,879088386 | -0,29 | 0,644818618 | -0,07 | 0,963149921 | 0,17  | 0,813596302 | -0,17 | 0,912478587 |
| Pnpt1    | -0,37 | 0,551578148 | 0,25  | 0,716437544 | -0,28 | 0,771729329 | 0,92  | 0,099217514 | 0,76  | 0,128620629 |
| Pnrc1    | -0,1  | 0,877096932 | 0,11  | 0,856130319 | -0,1  | 0,893321094 | -0,22 | 0,656038987 | 0,04  | 0,969617491 |
| Pnrc2    | -0,12 | 0,772012849 | -0,04 | 0,959636241 | -0,22 | 0,635864143 | -0,12 | 0,832134224 | -0,25 | 0,73141172  |
| Poc1a    | -0,49 | 0,279793863 | 0,59  | 0,209192071 | 0,41  | 0,433481425 | -0,26 | 0,615596174 | -0,14 | 0,865866242 |
| Poc1b    | -0,23 | 0,7354177   | 0,18  | 0,889215021 | 0,5   | 0,590619197 | -0,03 | 0,974473704 | -0,24 | 0,811321326 |
| Poc5     | 0,17  | 0,800740285 | -0,8  | 0,532983509 | 0,95  | 0,158616089 | 0,33  | 0,870331513 | 0,51  | 0,801385411 |
| Podn     | 0,22  | 0,815332681 | 0,35  | 0,73274163  | -0,12 | 0,932600584 | -1,6  | 0,025067045 | -0,42 | 0,712793529 |
| Podn1    | 0,54  | 0,305893528 | 0,07  | 0,958818588 | 0,15  | 0,885048004 | 0,28  | 0,543079385 | 0,5   | 0,30451614  |
| Podxl    | -0,28 | 0,59710379  | -0,11 | 0,817110093 | -0,52 | 0,366234911 | -1,39 | 0,009316702 | -0,08 | 0,915363101 |
| Podxl2   | -0,41 | 0,248185898 | -0,23 | 0,611467628 | 0,16  | 0,830696784 | 0,07  | 0,885463705 | -0,41 | 0,355523852 |

|         |       |             |       |             |       |             |       |             |       |             |
|---------|-------|-------------|-------|-------------|-------|-------------|-------|-------------|-------|-------------|
| Pof1b   | 0,49  | 0,420942329 | -0,19 | 0,880892852 | -0,29 | 0,644036028 | 0,07  | 0,938968968 | 0,07  | 0,944241841 |
| Pofut1  | 0     | 0,998927419 | -0,03 | 0,979293032 | -0,06 | 0,950846671 | -0,61 | 0,265568899 | -0,67 | 0,211249015 |
| Pofut2  | -0,07 | 0,927072151 | -0,35 | 0,425972721 | 0,47  | 0,431683233 | 0,71  | 0,282706649 | -0,11 | 0,940092696 |
| Pogk    | 0,68  | 0,404203599 | 0     | 1           | -0,03 | 0,988373086 | 0,31  | 0,887937123 | 0,39  | 0,85155002  |
| Poglut1 | -0,37 | 0,673291416 | -0,24 | 0,801151945 | 0,5   | 0,624057916 | 0,23  | 0,643029225 | -0,37 | 0,709224776 |
| Pogz    | 0,34  | 0,469692532 | 0,01  | 0,997537323 | 0,14  | 0,91344763  | -0,41 | 0,409346728 | -0,17 | 0,831108986 |
| Pola1   | -0,33 | 0,843029805 | -1,6  | 0,358897515 | 0,54  | 0,460914763 | 0,68  | 0,517178455 | -0,72 | 0,321751898 |
| Pola2   | 0,16  | 0,738479193 | 0,17  | 0,831580851 | 0,21  | 0,774337646 | -0,46 | 0,283327727 | 0,53  | 0,251657596 |
| Polb    | -0,02 | 0,980700612 | 0,17  | 0,71865307  | -0,06 | 0,936840991 | -0,6  | 0,511580753 | -0,01 | 0,994212273 |
| Pold1   | -0,51 | 0,222236104 | -1,04 | 0,33799047  | 1     | 0,197507065 | 0,32  | 0,73934834  | -0,45 | 0,615859063 |
| Pold2   | -0,88 | 0,117703653 | -0,71 | 0,294241321 | 0,94  | 0,102228826 | 0,73  | 0,418568872 | 0,19  | 0,881613493 |
| Pold3   | -0,36 | 0,460103183 | -0,1  | 0,858860016 | -0,32 | 0,569943085 | 0,35  | 0,427469169 | 0,06  | 0,952753183 |
| Pold4   | 0,14  | 0,832696131 | 0,11  | 0,873446866 | -0,08 | 0,919116989 | 0,71  | 0,231969406 | -0,34 | 0,595396727 |
| Poldip2 | -0,53 | 0,343843859 | 0,1   | 0,838368852 | 0,27  | 0,729031049 | 0,22  | 0,555470395 | -0,39 | 0,426142221 |
| Poldip3 | 0,04  | 0,952540667 | 0,07  | 0,88325516  | 0,52  | 0,329525512 | 0,14  | 0,767937787 | -0,12 | 0,882728747 |
| Pole    | -1,95 | 0,01522448  | -2,45 | 0,12602067  | 1,43  | 0,087158619 | 1,93  | 0,035685356 | -0,88 | 0,177268295 |
| Pole2   | -0,93 | 0,52132136  | -1,03 | 0,241189065 | 0,77  | 0,136498039 | 1,31  | 0,225406554 | -0,26 | 0,860282167 |
| Pole3   | -0,26 | 0,806491264 | -0,19 | 0,842663656 | 1,65  | 0,01989812  | 1,03  | 0,290774064 | 0,2   | 0,897041479 |
| Pole4   | 0,29  | 0,704641551 | -0,37 | 0,494666675 | 0,06  | 0,954550124 | 0,57  | 0,406031453 | 0,9   | 0,198883002 |
| Polg    | 0     | 0,998769353 | -0,3  | 0,697354745 | 0,13  | 0,897753114 | 0,24  | 0,665234661 | -0,07 | 0,951646452 |
| Polg2   | -0,14 | 0,884190046 | 0,19  | 0,735554037 | -0,83 | 0,251538326 | -0,45 | 0,495000574 | -0,04 | 0,979456872 |
| Polh    | -0,84 | 0,428049245 | -0,68 | 0,208445991 | 0,45  | 0,550662565 | 1,03  | 0,423188824 | 0,46  | 0,792305774 |
| Poli    | -0,27 | 0,747541552 | 0,41  | 0,378737612 | -0,62 | 0,310532869 | -0,18 | 0,806497386 | -0,44 | 0,529395677 |
| Polk    | -0,06 | 0,958188047 | 0,25  | 0,849346754 | -0,01 | 0,995414392 | -0,21 | 0,702311689 | -0,71 | 0,16937746  |
| Poll    | -0,33 | 0,560461791 | -0,31 | 0,43731683  | -0,61 | 0,484876845 | -0,08 | 0,883653044 | -0,69 | 0,180485373 |
| Polm    | -0,05 | 0,960597621 | -0,31 | 0,59511701  | 0,04  | 0,97532982  | 0,16  | 0,740434535 | -0,46 | 0,451070574 |
| Poln    | -0,99 | 0,321798414 | -0,17 | 0,922588722 | 0,74  | 0,237014627 | 0,23  | 0,873872972 | -0,03 | 0,984125319 |
| Polq    | -0,72 | 0,156158686 | -0,72 | 0,200336704 | 0,93  | 0,130256376 | 0,66  | 0,155619139 | 0,01  | 0,993645187 |
| Polr1a  | -0,6  | 0,332783543 | -0,7  | 0,16121328  | 0,29  | 0,746570045 | 0,9   | 0,169997936 | -0,12 | 0,911685487 |
| Polr1b  | -1,43 | 0,097395165 | -0,31 | 0,641639047 | 1,05  | 0,37970041  | 0,31  | 0,587199948 | -0,72 | 0,439038071 |
| Polr1c  | -0,21 | 0,613387484 | -0,01 | 0,990767956 | 0,32  | 0,660517013 | 0,87  | 0,110493709 | 0,33  | 0,673145862 |
| Polr1d  | -0,25 | 0,587011701 | -0,21 | 0,790033542 | 0,31  | 0,601532621 | 0,53  | 0,169949875 | 0,09  | 0,939127163 |
| Polr1e  | -0,98 | 0,146504462 | -0,26 | 0,765325717 | 1,16  | 0,068894819 | 1,36  | 0,1166464   | 0,19  | 0,88282824  |
| Polr2a  | -0,35 | 0,324012981 | -0,36 | 0,392843884 | 0,46  | 0,35315362  | 0,16  | 0,806415908 | 0,11  | 0,905842374 |
| Polr2b  | -0,31 | 0,390360486 | -0,03 | 0,977204386 | 0,23  | 0,665554804 | -0,27 | 0,533941098 | 0,03  | 0,974939495 |

|           |       |             |       |             |       |             |       |             |       |             |
|-----------|-------|-------------|-------|-------------|-------|-------------|-------|-------------|-------|-------------|
| Polr2c    | -0,08 | 0,947334195 | -0,11 | 0,903595287 | -0,04 | 0,981207238 | 0,36  | 0,56693064  | -0,18 | 0,836715889 |
| Polr2d    | -0,34 | 0,654363277 | -0,53 | 0,567985291 | 0,4   | 0,483761569 | 0,42  | 0,357261043 | -0,1  | 0,890944793 |
| Polr2e    | -0,52 | 0,318065307 | -0,59 | 0,187729631 | 0,55  | 0,406287436 | -0,49 | 0,378056559 | -0,3  | 0,674381312 |
| Polr2f    | -0,16 | 0,778869381 | -0,45 | 0,279092572 | 0,36  | 0,404120029 | 0,22  | 0,597350222 | -0,11 | 0,891925115 |
| Polr2g    | 0,12  | 0,808572184 | 0,16  | 0,773751321 | 0,05  | 0,945491799 | 0,36  | 0,398422441 | 0,66  | 0,198189544 |
| Polr2h    | 0,02  | 0,976574175 | 0     | 0,997900901 | 0,23  | 0,797272969 | 0,27  | 0,382751556 | 0,11  | 0,865258929 |
| Polr2i    | 0,12  | 0,862360472 | -0,21 | 0,747433721 | 0,13  | 0,907735321 | 0,35  | 0,3550569   | -0,01 | 0,991071486 |
| Polr2j    | -0,02 | 0,973526435 | -0,02 | 0,984000632 | 0,35  | 0,622546805 | 0,04  | 0,959517097 | -0,01 | 0,989300476 |
| Polr2k    | 0,25  | 0,689966234 | -0,22 | 0,860629851 | 0,12  | 0,901410016 | -0,12 | 0,813667931 | -0,28 | 0,68987325  |
| Polr2l    | -0,03 | 0,989536427 | 0,09  | 0,915578725 | -1,42 | 0,034161362 | -1,22 | 0,135560136 | 0,63  | 0,474331597 |
| Polr2m    | -0,13 | 0,898269435 | 0,02  | 0,989873399 | 0,19  | 0,829543101 | -0,18 | 0,858632076 | 0,52  | 0,560964387 |
| Polr3a    | -0,23 | 0,698332739 | -0,2  | 0,746660273 | 0,22  | 0,828424248 | 0,58  | 0,314372916 | 0,1   | 0,927296036 |
| Polr3b    | -0,1  | 0,864715022 | -0,34 | 0,655607331 | -0,12 | 0,885680687 | 0,19  | 0,779547737 | 0,32  | 0,597080822 |
| Polr3c    | 0     | 0,999010996 | -0,32 | 0,723384777 | -0,06 | 0,967767582 | 0,42  | 0,399865469 | -0,39 | 0,489004857 |
| Polr3d    | -0,1  | 0,917759029 | 0,36  | 0,530207532 | 0,18  | 0,761207281 | 0,28  | 0,623313665 | 0,31  | 0,671243229 |
| Polr3e    | 0,03  | 0,976870178 | -0,45 | 0,608053892 | 0,3   | 0,578272972 | 0,87  | 0,290105047 | 0,21  | 0,840952901 |
| Polr3f    | 0,59  | 0,526698411 | -0,2  | 0,917623085 | 0,21  | 0,811424918 | -0,99 | 0,428459499 | -0,59 | 0,583279373 |
| Polr3g    | -0,58 | 0,436086286 | -0,37 | 0,665887221 | 0,23  | 0,806955133 | 1,08  | 0,071146549 | -0,53 | 0,653769438 |
| Polr3gl   | 0,11  | 0,886172809 | 0,49  | 0,508633526 | -0,18 | 0,899913569 | -0,88 | 0,414539918 | 0,31  | 0,836715889 |
| Polr3h    | -0,36 | 0,555027419 | -1,03 | 0,443348029 | 0,52  | 0,527929204 | 0,73  | 0,271257495 | -0,15 | 0,845218636 |
| Polr3k    | 0,12  | 0,791959729 | -0,51 | 0,590722193 | 0,49  | 0,59595639  | 1,23  | 0,182991717 | 0,06  | 0,975200543 |
| Polrmt    | -0,5  | 0,242651292 | -0,86 | 0,141157706 | -0,13 | 0,852522547 | 0,42  | 0,441190012 | -0,46 | 0,504445914 |
| Pom121    | -0,22 | 0,739833092 | -0,29 | 0,467853942 | 0,63  | 0,365062366 | 0,44  | 0,185628374 | -0,19 | 0,75509516  |
| Pom121l12 | 0     | 0,996998625 | 0,02  | 0,972776489 | -0,01 | 0,988397392 | 0,02  | 0,958889858 | 0,15  | 0,800540569 |
| Pom121l2  | 0,34  | 0,455714377 | -0,33 | 0,790939978 | -0,01 | 0,992919703 | 0,36  | 0,617807402 | -0,15 | 0,868176357 |
| Pomc      | -0,21 | 0,761716597 | -0,3  | 0,761404909 | -0,73 | 0,359711139 | 0,13  | 0,820745707 | 0,05  | 0,94989088  |
| Pomgnt1   | -0,56 | 0,5543272   | -0,08 | 0,891749049 | 0,53  | 0,404341148 | -0,02 | 0,977176942 | -0,02 | 0,989199681 |
| Pomgnt2   | -0,39 | 0,481799453 | 0,28  | 0,536246395 | -0,12 | 0,874098993 | -0,02 | 0,967216871 | -0,08 | 0,935543699 |
| Pomk      | 0,37  | 0,687061733 | -0,05 | 0,926157704 | 0     | 0,997581017 | 0,15  | 0,82237355  | 0,11  | 0,902226626 |
| Pomp      | -0,07 | 0,909477787 | -0,03 | 0,968137523 | -0,1  | 0,899473837 | 0,74  | 0,045630952 | 0,31  | 0,516721132 |
| Pomt1     | -0,27 | 0,869225685 | 0,02  | 0,989873399 | 0,39  | 0,804607903 | -0,3  | 0,324794827 | -0,32 | 0,669861917 |
| Pomt2     | -0,41 | 0,511199837 | -0,26 | 0,641804702 | -0,21 | 0,824682741 | 0,06  | 0,914272156 | -0,1  | 0,910083563 |
| Pon1      | 0,17  | 0,68161851  | 0,03  | 0,982786635 | 0,06  | 0,946627221 | -0,21 | 0,669457175 | 0,23  | 0,765342998 |
| Pon2      | -0,22 | 0,722504009 | -0,37 | 0,579053234 | 0,27  | 0,740579016 | 0,08  | 0,896599656 | -0,27 | 0,697226565 |
| Pon3      | 0,19  | 0,67806773  | -0,91 | 0,237729748 | 1,36  | 0,107883534 | 1,07  | 0,036226618 | -0,67 | 0,257751018 |



|         |       |             |       |             |       |             |       |             |       |             |
|---------|-------|-------------|-------|-------------|-------|-------------|-------|-------------|-------|-------------|
| Pop1    | -0,79 | 0,24489967  | -0,33 | 0,727767551 | 0,54  | 0,507741976 | 0,51  | 0,483554745 | -0,77 | 0,386881171 |
| Pop4    | -0,04 | 0,954517543 | -0,44 | 0,310156816 | 0,17  | 0,807786405 | 0,59  | 0,286855307 | -0,62 | 0,376276167 |
| Pop5    | -0,12 | 0,820581463 | -0,14 | 0,823859284 | 0,23  | 0,773365699 | -0,13 | 0,803548287 | 0,24  | 0,730289864 |
| Pop7    | 0,21  | 0,767849254 | 0,11  | 0,854520972 | 0,14  | 0,862869965 | 0,62  | 0,330590988 | 0,38  | 0,634379906 |
| Popdc2  | -0,02 | 0,984124693 | 0,12  | 0,898495267 | -0,74 | 0,199678278 | -0,1  | 0,846864577 | 0,14  | 0,935776808 |
| Popdc3  | 0,02  | 0,982213914 | -0,02 | 0,982124281 | 0,12  | 0,82162081  | -0,11 | 0,85846312  | -0,05 | 0,953297732 |
| Por     | 0,03  | 0,971922167 | -0,13 | 0,781665479 | 0,1   | 0,881924837 | -1,15 | 0,040207275 | -0,25 | 0,703332663 |
| Porcn   | -0,21 | 0,778869381 | -0,12 | 0,854906955 | 0,37  | 0,627285396 | -0,78 | 0,107636192 | -0,31 | 0,650667979 |
| Postn   | -0,51 | 0,775384541 | -1,03 | 0,580949957 | 0,8   | 0,663029337 | -0,91 | 0,455164618 | -2,47 | 0,058814936 |
| Pot1a   | -0,64 | 0,436489637 | -0,35 | 0,559617305 | 0,91  | 0,251163099 | 0,02  | 0,982398921 | -0,47 | 0,720742956 |
| Pot1b   | -0,2  | 0,79498488  | -0,68 | 0,556617566 | 0,09  | 0,946777487 | -0,32 | 0,69151142  | -1,04 | 0,145503811 |
| Poteg   | 0,05  | 0,948120764 | -0,03 | 0,967833514 | -0,3  | 0,660920525 | -0,07 | 0,923386035 | -0,02 | 0,986971861 |
| Pou1f1  | 0,07  | 0,946111085 | 0,04  | 0,943915456 | -0,02 | 0,987003605 | 0,16  | 0,732310808 | 0,17  | 0,859663155 |
| Pou2af1 | 0,55  | 0,156227666 | 0,15  | 0,74245372  | -0,19 | 0,770526999 | -0,1  | 0,8914104   | 0     | 0,998164722 |
| Pou2f1  | 0,27  | 0,63880179  | 0,29  | 0,438172935 | -0,22 | 0,757498725 | -0,63 | 0,259970167 | -0,45 | 0,511962622 |
| Pou2f2  | 0,17  | 0,738714467 | 0,01  | 0,992017084 | -0,05 | 0,967944619 | 0,22  | 0,609350605 | 0,11  | 0,912250982 |
| Pou2f3  | -0,39 | 0,584438237 | 0,3   | 0,933083523 | -0,17 | 0,887630371 | 1,02  | 0,532527562 | 0,26  | 0,871007445 |
| Pou3f1  | -0,01 | 0,991216662 | 0,17  | 0,881339866 | -0,1  | 0,892705612 | -0,46 | 0,191726739 | 0,73  | 0,104257693 |
| Pou3f2  | 0,08  | 0,8977182   | 0,15  | 0,794596751 | -0,16 | 0,811619364 | -0,1  | 0,911299459 | -0,16 | 0,892499952 |
| Pou3f3  | 0,01  | 0,991516118 | 0,06  | 0,892869412 | -0,17 | 0,737241227 | -0,02 | 0,967866794 | 0,21  | 0,786084304 |
| Pou3f4  | 0,06  | 0,903817676 | 0,09  | 0,840564791 | -0,15 | 0,756216349 | 0,02  | 0,973261665 | 0,1   | 0,890797922 |
| Pou4f1  | 0,28  | 0,751420845 | 0,36  | 0,598307698 | -0,16 | 0,803099359 | -0,06 | 0,944558253 | 0,17  | 0,823098095 |
| Pou4f2  | 0,55  | 0,474293292 | 0,62  | 0,640836969 | -0,93 | 0,31338379  | 0,45  | 0,376628904 | -0,08 | 0,949244147 |
| Pou4f3  | 0,09  | 0,901423737 | 0,06  | 0,940046211 | -0,03 | 0,97674065  | -0,02 | 0,963678375 | 0     | 0,999956454 |
| Pou5f1  | 0,27  | 0,740529913 | -0,31 | 0,732044571 | -0,31 | 0,84302419  | 0,11  | 0,874607411 | 0,09  | 0,962631948 |
| Pou5f2  | 0,51  | 0,442976018 | -0,02 | 0,989036108 | 0,02  | 0,985977985 | 0,1   | 0,809215992 | 0,08  | 0,927536545 |
| Pou6f1  | 0,05  | 0,933039985 | 0,1   | 0,89081665  | 0,09  | 0,910991892 | -0,28 | 0,543829463 | -0,01 | 0,990654438 |
| Pou6f2  | 0,04  | 0,959774806 | 0,36  | 0,388595716 | 0,08  | 0,948359548 | -0,03 | 0,971539135 | -0,25 | 0,769909998 |
| Pp2d1   | -0,04 | 0,964272364 | 0,27  | 0,629486849 | -0,01 | 0,993233903 | -0,25 | 0,687256721 | 0,09  | 0,925858284 |
| Ppa1    | 0,27  | 0,613990129 | 0,65  | 0,156641631 | -0,67 | 0,201865738 | 2,58  | 0,134491611 | 2,84  | 0,058814936 |
| Ppa2    | 0,23  | 0,786316419 | -0,8  | 0,275147283 | 0,69  | 0,437315481 | 0,12  | 0,880201855 | -0,33 | 0,639021453 |
| Ppan    | -0,53 | 0,370606588 | -0,53 | 0,490473569 | 0,82  | 0,429959482 | 1,36  | 0,135271349 | 0,53  | 0,546431165 |
| Ppara   | 0,71  | 0,286058681 | -0,2  | 0,765705056 | 0,07  | 0,937901585 | -0,44 | 0,690442683 | -0,21 | 0,883664248 |
| Ppard   | -0,24 | 0,608307071 | 0,19  | 0,78280538  | 0,29  | 0,705621758 | 0,65  | 0,062839484 | -0,48 | 0,547497757 |
| Pparg   | 0,58  | 0,596655034 | -0,49 | 0,536821393 | -0,6  | 0,437551888 | 0,05  | 0,970165633 | 0,3   | 0,840515079 |

|          |       |             |       |             |       |             |       |             |       |             |
|----------|-------|-------------|-------|-------------|-------|-------------|-------|-------------|-------|-------------|
| Ppargc1a | -0,03 | 0,982703709 | -0,09 | 0,948531372 | -0,22 | 0,775290551 | -2,12 | 0,010692197 | 0,01  | 0,994988084 |
| Ppargc1b | 0,28  | 0,68194299  | -0,06 | 0,956657797 | -0,21 | 0,89935302  | -0,31 | 0,648017857 | -0,09 | 0,948163009 |
| Ppat     | -0,96 | 0,181672845 | -0,66 | 0,298168653 | -0,4  | 0,626338135 | -0,17 | 0,643786331 | -0,24 | 0,765327693 |
| Pbbp     | 0,31  | 0,63695891  | 0,48  | 0,680709276 | 0,66  | 0,650361351 | 1,15  | 0,398276111 | 0,79  | 0,655956123 |
| Ppcdc    | 0,37  | 0,585780254 | 0,03  | 0,981441793 | 0,02  | 0,987076439 | -0,43 | 0,450587731 | -0,31 | 0,745574572 |
| Ppcs     | 0,27  | 0,676800971 | 0,32  | 0,392843884 | -0,17 | 0,890702663 | -0,34 | 0,444137162 | 0,47  | 0,400708488 |
| Ppef1    | 0,39  | 0,370865024 | -0,11 | 0,938088718 | -0,22 | 0,706638581 | 0,4   | 0,635598334 | 0,11  | 0,906338603 |
| Ppef2    | 0,34  | 0,683299822 | -0,01 | 0,999395995 | 0,06  | 0,94191438  | 0,39  | 0,623649597 | -0,18 | 0,883885544 |
| Ppfia1   | -0,51 | 0,247531815 | 0,25  | 0,649001924 | -0,12 | 0,879319538 | -0,33 | 0,468490835 | -0,13 | 0,928764431 |
| Ppfia2   | -0,24 | 0,559910758 | -0,26 | 0,840725934 | -0,41 | 0,488256978 | 0,03  | 0,990388217 | 0,33  | 0,839474287 |
| Ppfia3   | 0,04  | 0,972164346 | 0,58  | 0,29534854  | 0,69  | 0,309752189 | -0,66 | 0,363991251 | -0,07 | 0,965244101 |
| Ppfia4   | 0,07  | 0,93992615  | 0,04  | 0,976423495 | 0     | 0,997268369 | -0,03 | 0,965471779 | 0,07  | 0,939127163 |
| Ppfibp1  | -0,26 | 0,617280733 | -0,05 | 0,946635627 | 0,26  | 0,578720052 | 0,13  | 0,779547737 | 0,07  | 0,934242963 |
| Ppfibp2  | -0,44 | 0,647337606 | -0,46 | 0,333686271 | 0,11  | 0,933880691 | -0,85 | 0,117192962 | -0,56 | 0,452376077 |
| Pphln1   | -0,23 | 0,818182081 | -0,1  | 0,912137323 | 0,72  | 0,418405756 | 1,12  | 0,058864828 | -0,12 | 0,922151079 |
| Ppia     | -0,1  | 0,820023436 | -0,16 | 0,686540452 | 0,19  | 0,689706017 | 0,14  | 0,698362346 | 0     | 0,9969305   |
| Ppib     | 0,01  | 0,991919022 | -0,03 | 0,962980292 | 0,21  | 0,708522391 | 0,6   | 0,195204042 | -0,13 | 0,874491434 |
| Ppic     | 0,03  | 0,960597621 | -0,14 | 0,76325936  | 0,15  | 0,846975965 | 1,39  | 0,012175785 | -0,43 | 0,372361067 |
| Ppid     | -0,54 | 0,303932151 | -0,6  | 0,231499374 | -0,04 | 0,969928932 | 0,69  | 0,129851263 | 0,28  | 0,697757911 |
| Ppie     | 0,07  | 0,959985598 | -0,17 | 0,797338097 | 1,2   | 0,154381883 | 0,23  | 0,870043183 | -0,79 | 0,481762055 |
| Ppif     | -0,19 | 0,882539359 | 0,28  | 0,849502009 | 0,66  | 0,4814931   | -0,53 | 0,454995407 | 0,23  | 0,699060093 |
| Ppifos   | -0,09 | 0,90946033  | -0,29 | 0,74245372  | -0,01 | 0,993379272 | 0,8   | 0,286855307 | 0,05  | 0,953297732 |
| Ppig     | 0,1   | 0,815332681 | 0,08  | 0,928920047 | -0,03 | 0,969591499 | -0,12 | 0,849242587 | 0,27  | 0,697818445 |
| Ppil1    | -0,58 | 0,6819661   | -0,83 | 0,220081782 | 0,97  | 0,120754101 | 1,7   | 0,055766308 | -0,18 | 0,896355106 |
| Ppil2    | -0,03 | 0,950669622 | 0,11  | 0,884434898 | -0,06 | 0,93974486  | 0,03  | 0,973986088 | 0,12  | 0,915238726 |
| Ppil3    | -0,29 | 0,69184055  | -0,13 | 0,869673273 | -0,17 | 0,880622107 | 1,11  | 0,171856639 | 0,08  | 0,957298635 |
| Ppil4    | 0,12  | 0,841584453 | -0,04 | 0,958545812 | -0,19 | 0,8271738   | -0,47 | 0,206540971 | -0,08 | 0,93367447  |
| Ppil6    | -0,05 | 0,970463755 | 0,95  | 0,524552054 | -0,16 | 0,899913569 | -0,68 | 0,571919285 | 0,29  | 0,9013159   |
| Ppip5k1  | 0,02  | 0,981400637 | -0,12 | 0,882589938 | 0,13  | 0,8785896   | 0,33  | 0,375830483 | 0,15  | 0,862456985 |
| Ppip5k2  | -0,22 | 0,729638783 | -0,15 | 0,937377463 | -0,21 | 0,800150738 | -0,01 | 0,996714438 | 0,16  | 0,902802615 |
| Ppl      | -0,32 | 0,61342177  | 0,18  | 0,781665479 | 0,38  | 0,716467874 | -1,05 | 0,059024664 | 0,4   | 0,529333588 |
| Ppm1a    | -0,25 | 0,59648949  | -0,12 | 0,786640757 | 0,5   | 0,397772487 | 0,39  | 0,483113127 | 0,28  | 0,697189886 |
| Ppm1b    | 0,45  | 0,414026998 | -0,24 | 0,582478031 | 1     | 0,349305808 | 0,06  | 0,911958998 | -0,16 | 0,777125206 |
| Ppm1d    | 0,17  | 0,849571502 | -0,64 | 0,336433977 | 0,43  | 0,562427034 | -0,42 | 0,254529194 | -0,45 | 0,464573202 |
| Ppm1e    | 0,13  | 0,912510949 | -0,11 | 0,943915456 | -0,2  | 0,843785017 | -1,7  | 0,036143752 | -0,38 | 0,702558142 |

|           |       |             |       |             |       |             |       |             |       |             |
|-----------|-------|-------------|-------|-------------|-------|-------------|-------|-------------|-------|-------------|
| Ppm1f     | -0,67 | 0,228694841 | -0,09 | 0,857503073 | 0,56  | 0,506222058 | -0,04 | 0,96549656  | -0,12 | 0,927807084 |
| Ppm1g     | -0,84 | 0,129299808 | -0,39 | 0,456156525 | 0,41  | 0,625745801 | 0,65  | 0,603355547 | 0,25  | 0,887732548 |
| Ppm1h     | -0,19 | 0,890399821 | 0,5   | 0,459417799 | -0,49 | 0,75990504  | -0,37 | 0,418017948 | -0,45 | 0,488165064 |
| Ppm1j     | 0,22  | 0,701391957 | 0,1   | 0,88741189  | -0,2  | 0,89004987  | 2,18  | 0,065441734 | -0,64 | 0,516721132 |
| Ppm1k     | 0,64  | 0,271767062 | 1,43  | 0,138101221 | -0,98 | 0,103280223 | 0,82  | 0,662904979 | 1,53  | 0,310964033 |
| Ppm1l     | -0,4  | 0,510434756 | -0,09 | 0,89474305  | -0,36 | 0,737241227 | -0,7  | 0,442066053 | 0,64  | 0,586987425 |
| Ppm1m     | 0,07  | 0,938024826 | 0,01  | 0,991043706 | -0,24 | 0,76370647  | 0,14  | 0,827764222 | 0,14  | 0,904830156 |
| Ppm1n     | -0,44 | 0,507090099 | -0,21 | 0,78097655  | 0,22  | 0,775964228 | -0,37 | 0,564749161 | -0,26 | 0,776907684 |
| Ppme1     | 0,35  | 0,724976228 | 0,38  | 0,342494431 | -0,21 | 0,865148119 | 0,16  | 0,669934454 | -0,18 | 0,760587652 |
| Ppnr      | 0,42  | 0,520948125 | -0,04 | 0,936837377 | 0,14  | 0,922318683 | 0,06  | 0,942963301 | 0,25  | 0,788112596 |
| Ppox      | -0,01 | 0,987242447 | 0,23  | 0,762295026 | 0,11  | 0,916403684 | -0,18 | 0,804193987 | 0,28  | 0,77360786  |
| Ppp1ca    | -0,11 | 0,841140165 | -0,39 | 0,357865615 | 0,6   | 0,279980018 | 0,56  | 0,118956531 | -0,23 | 0,699935269 |
| Ppp1cb    | -0,02 | 0,975642108 | -0,06 | 0,945920068 | 0,03  | 0,986406216 | -0,05 | 0,932315462 | 0,18  | 0,740020498 |
| Ppp1cc    | -0,16 | 0,673732271 | -0,08 | 0,856029015 | 0,4   | 0,451210623 | 0,48  | 0,14803533  | 0,22  | 0,68987325  |
| Ppp1r10   | 0,12  | 0,79795086  | 0,23  | 0,784412375 | 0,17  | 0,75584904  | -1,14 | 0,065746684 | -0,44 | 0,447304786 |
| Ppp1r11   | 0,41  | 0,520545783 | 0,01  | 0,985764487 | -0,18 | 0,779859477 | 0,26  | 0,663121129 | 0,3   | 0,628171618 |
| Ppp1r12a  | 0,38  | 0,336952388 | 0,54  | 0,231183878 | -0,06 | 0,925417014 | -0,55 | 0,200558554 | 0,16  | 0,809134979 |
| Ppp1r12b  | -0,05 | 0,941184799 | -0,23 | 0,770882187 | 0,58  | 0,374827031 | -0,26 | 0,852423181 | -0,11 | 0,947559952 |
| Ppp1r12c  | 0,16  | 0,747663533 | 0,28  | 0,58591598  | 0,36  | 0,479303047 | 0,34  | 0,392579767 | 0,23  | 0,715879151 |
| Ppp1r13b  | -0,21 | 0,578154278 | 0,19  | 0,738762579 | 0,07  | 0,930391017 | 0,76  | 0,351862282 | -0,42 | 0,634425115 |
| Ppp1r13l  | -0,12 | 0,840909921 | -0,18 | 0,779951461 | 0,16  | 0,854115638 | 1,33  | 0,041009258 | -0,07 | 0,943015918 |
| Ppp1r14a  | -0,33 | 0,652819827 | -0,6  | 0,511594917 | 1,47  | 0,112229182 | 0,4   | 0,784479261 | -1,07 | 0,313564306 |
| Ppp1r14b  | -0,42 | 0,49976831  | -0,17 | 0,86411353  | 0,53  | 0,371340619 | 2,65  | 0,031382387 | 0,91  | 0,307816931 |
| Ppp1r14c  | -0,16 | 0,828910401 | -0,28 | 0,599353083 | -0,63 | 0,165887141 | -0,05 | 0,944543584 | 0,03  | 0,984255993 |
| Ppp1r14d  | -0,25 | 0,766575514 | 0,16  | 0,85037533  | -0,5  | 0,29832353  | 0,13  | 0,86410687  | 0,24  | 0,718869886 |
| Ppp1r15a  | 0,23  | 0,648730873 | 0,24  | 0,639698557 | -0,39 | 0,462123525 | -0,72 | 0,137449917 | -0,27 | 0,678835814 |
| Ppp1r15b  | -0,15 | 0,727275654 | 0,41  | 0,359483031 | 0,4   | 0,477893761 | 0,21  | 0,854525597 | 0,57  | 0,581802025 |
| Ppp1r16a  | -0,31 | 0,707480624 | -0,56 | 0,233076021 | 0,52  | 0,662322838 | 0,74  | 0,263537368 | -0,46 | 0,537240604 |
| Ppp1r16b  | 0,08  | 0,923035054 | 0,8   | 0,156641631 | -0,69 | 0,194619745 | -0,17 | 0,774826947 | 0,22  | 0,765809384 |
| Ppp1r17   | -0,3  | 0,687562841 | 0,01  | 0,999395995 | -0,12 | 0,901808921 | -0,04 | 0,971338071 | 0,2   | 0,773016008 |
| Ppp1r18   | -0,09 | 0,894248924 | 0,14  | 0,852461907 | 0,13  | 0,855523214 | 0,34  | 0,35953164  | 0,14  | 0,824725869 |
| Ppp1r18os | 0,03  | 0,953740954 | -0,02 | 0,987867499 | -0,07 | 0,941718633 | -0,39 | 0,628399455 | -0,21 | 0,840515079 |
| Ppp1r1a   | -0,14 | 0,848847477 | -0,11 | 0,87189957  | -0,03 | 0,973802765 | -0,19 | 0,747771055 | 0,03  | 0,975441362 |
| Ppp1r1b   | 0,25  | 0,689253784 | 0,24  | 0,540540009 | 0,16  | 0,788233735 | -0,08 | 0,94180692  | 0,12  | 0,923816228 |
| Ppp1r1c   | -0,02 | 0,968370059 | 0,56  | 0,3653327   | -0,16 | 0,868609956 | -0,35 | 0,684247831 | 0     | 0,999733463 |

|            |       |             |       |             |       |             |       |             |       |             |
|------------|-------|-------------|-------|-------------|-------|-------------|-------|-------------|-------|-------------|
| Ppp1r2     | -0,28 | 0,488512756 | -0,25 | 0,525873177 | 0,02  | 0,980801972 | -0,4  | 0,295744579 | 0,04  | 0,967304104 |
| Ppp1r21    | -0,26 | 0,765643907 | 0,09  | 0,953355735 | 0,89  | 0,215429632 | 0,16  | 0,83373219  | -0,24 | 0,810821641 |
| Ppp1r26    | 0,68  | 0,26418498  | 0,56  | 0,43310124  | -0,04 | 0,969570532 | -1    | 0,309045551 | -0,04 | 0,984125319 |
| Ppp1r27    | 0,02  | 0,986795639 | -0,28 | 0,676644212 | -0,16 | 0,780077469 | -0,48 | 0,56996551  | -0,22 | 0,843199194 |
| Ppp1r2-ps3 | -0,13 | 0,757239936 | -0,2  | 0,599008089 | 0,01  | 0,990836784 | 0,23  | 0,471733727 | 0,18  | 0,754099916 |
| Ppp1r2-ps7 | -0,09 | 0,840909921 | 0,18  | 0,812432185 | -0,06 | 0,925417014 | -0,08 | 0,849635877 | -0,06 | 0,94250983  |
| Ppp1r2-ps9 | 0,08  | 0,852363306 | 0,12  | 0,794404033 | -0,09 | 0,88539334  | 0,01  | 0,98283761  | 0,01  | 0,993413582 |
| Ppp1r32    | 0,14  | 0,840909921 | 0,58  | 0,316529128 | -0,32 | 0,564103482 | -0,52 | 0,21995895  | -0,13 | 0,894623317 |
| Ppp1r35    | -0,17 | 0,841134954 | -0,24 | 0,745921616 | -0,29 | 0,625578952 | -0,09 | 0,920640884 | -0,19 | 0,829834904 |
| Ppp1r36    | 0,04  | 0,948538969 | -0,22 | 0,838808203 | -0,13 | 0,859484164 | 0,21  | 0,734587328 | 0,33  | 0,62559702  |
| Ppp1r37    | -0,19 | 0,721797378 | 0,28  | 0,761404909 | -0,48 | 0,428556311 | -0,65 | 0,400497416 | 0,14  | 0,927296036 |
| Ppp1r3a    | 0,33  | 0,651360301 | -0,39 | 0,458770201 | -0,02 | 0,983471086 | 0,35  | 0,393201346 | 0,01  | 0,992276851 |
| Ppp1r3b    | 0,58  | 0,269151748 | 0,06  | 0,959837002 | -0,06 | 0,973404462 | -0,33 | 0,595862706 | 0     | 0,998332822 |
| Ppp1r3c    | -0,11 | 0,892823025 | -0,11 | 0,850001559 | 0,09  | 0,939991258 | 0,02  | 0,989791016 | 0,11  | 0,906300482 |
| Ppp1r3d    | -0,1  | 0,876019664 | 0,52  | 0,750458416 | 0,35  | 0,644036028 | -0,28 | 0,807008095 | 0,49  | 0,59723698  |
| Ppp1r3e    | -0,15 | 0,829198831 | -0,26 | 0,840881774 | 1,03  | 0,212291286 | -0,39 | 0,441739108 | -0,28 | 0,70401038  |
| Ppp1r3f    | -0,22 | 0,825389612 | -0,25 | 0,716684136 | 0,06  | 0,975055092 | 0,12  | 0,933919492 | 0     | 0,999572304 |
| Ppp1r3fos  | 0,29  | 0,648730873 | -0,03 | 0,95830747  | 0,07  | 0,962354011 | 0,02  | 0,979516321 | 0,36  | 0,59705803  |
| Ppp1r3g    | 0,11  | 0,869565514 | 0,14  | 0,815022365 | -0,15 | 0,893003322 | 0,03  | 0,965653854 | 0,07  | 0,930824723 |
| Ppp1r42    | 0,15  | 0,783200207 | 0,07  | 0,961370411 | 0,15  | 0,804607903 | -0,48 | 0,513116548 | -0,21 | 0,819072786 |
| Ppp1r7     | -0,95 | 0,126768659 | -0,27 | 0,669079647 | 0,25  | 0,558908463 | -0,05 | 0,923959343 | -0,1  | 0,893117638 |
| Ppp1r8     | -0,27 | 0,672603785 | -0,04 | 0,967383815 | 0,05  | 0,964509282 | -0,21 | 0,881334406 | 0,03  | 0,984125319 |
| Ppp1r9a    | 0,1   | 0,915575695 | -0,29 | 0,788059863 | 0,27  | 0,656894717 | -0,02 | 0,986515068 | 0,21  | 0,81954505  |
| Ppp1r9b    | -0,51 | 0,180356049 | 0,32  | 0,641483441 | 0,2   | 0,841464759 | -0,36 | 0,437001704 | -0,13 | 0,861236592 |
| Ppp2ca     | 0     | 0,996998625 | -0,13 | 0,822848743 | 0,2   | 0,830922867 | 0,71  | 0,147758571 | 0,09  | 0,928724353 |
| Ppp2cb     | 0,07  | 0,900285421 | 0,11  | 0,810635763 | -0,24 | 0,807926482 | 0,11  | 0,845813504 | -0,14 | 0,871762678 |
| Ppp2r1a    | -0,38 | 0,38239969  | -0,35 | 0,43731683  | 0,48  | 0,500849254 | 0,19  | 0,635482645 | -0,14 | 0,840478118 |
| Ppp2r1b    | -0,87 | 0,074890017 | -0,3  | 0,677440358 | 0,52  | 0,676675094 | 1,21  | 0,081875282 | 0,2   | 0,825862506 |
| Ppp2r2a    | -0,04 | 0,956452501 | 0,22  | 0,775583163 | 0,02  | 0,990836784 | 0,22  | 0,515959848 | -0,03 | 0,978012436 |
| Ppp2r2b    | 0,14  | 0,869565514 | -0,43 | 0,35496087  | -0,31 | 0,720069267 | 0,07  | 0,949669541 | 0,08  | 0,961749007 |
| Ppp2r2c    | -0,1  | 0,875761483 | -0,31 | 0,421936856 | 0,36  | 0,486395161 | -0,1  | 0,829713677 | 0,41  | 0,465535486 |
| Ppp2r2cos  | -0,03 | 0,972164346 | 0,11  | 0,828219939 | -0,14 | 0,855381787 | -0,23 | 0,475216812 | 0     | 0,997254437 |
| Ppp2r2d    | 0,23  | 0,658350988 | 0,31  | 0,702324895 | 0,23  | 0,825948504 | 0,01  | 0,993869623 | 0,3   | 0,69063878  |
| Ppp2r3a    | 0,28  | 0,679733535 | 0,62  | 0,235155604 | -0,16 | 0,862246043 | 0,39  | 0,379392822 | 0,28  | 0,708898543 |
| Ppp2r3c    | 0,18  | 0,87094817  | 0,39  | 0,630199793 | -0,01 | 0,993379272 | 0,14  | 0,893150543 | 0,04  | 0,976743304 |

|            |       |             |       |             |       |             |       |             |       |             |
|------------|-------|-------------|-------|-------------|-------|-------------|-------|-------------|-------|-------------|
| Ppp2r3d    | 0,07  | 0,962399085 | -0,53 | 0,602956592 | 0,54  | 0,709846532 | 0,57  | 0,648610964 | 0,89  | 0,290947419 |
| Ppp2r4     | 0,1   | 0,859479833 | -0,15 | 0,756584634 | 0,6   | 0,13589176  | 0,3   | 0,341092706 | -0,29 | 0,537240604 |
| Ppp2r5a    | 0,22  | 0,717407143 | 0,09  | 0,854940418 | 0,08  | 0,94665439  | 0,17  | 0,612464969 | 0,18  | 0,752187547 |
| Ppp2r5b    | -0,26 | 0,70137787  | -0,15 | 0,787322926 | -0,23 | 0,732318987 | 0,32  | 0,431801951 | -0,01 | 0,992370267 |
| Ppp2r5c    | 0,05  | 0,944309453 | 0,07  | 0,905517116 | 0,41  | 0,435556279 | 0,1   | 0,852814128 | -0,29 | 0,633449435 |
| Ppp2r5d    | -0,7  | 0,194977962 | -0,31 | 0,475024915 | 1,52  | 0,229145687 | 0,14  | 0,754808755 | -0,47 | 0,32673984  |
| Ppp2r5e    | -0,28 | 0,600861507 | -0,09 | 0,883843639 | 0,07  | 0,937346852 | 0,35  | 0,521662753 | 0,06  | 0,958856121 |
| Ppp3ca     | -0,06 | 0,923749064 | -0,03 | 0,959685428 | -0,2  | 0,676693033 | 0,06  | 0,896599656 | 0,09  | 0,894623317 |
| Ppp3cb     | -0,27 | 0,535370545 | -0,33 | 0,642169508 | 0,12  | 0,906097666 | 0,35  | 0,567260164 | 0,48  | 0,484862172 |
| Ppp3cc     | 0,22  | 0,687662951 | 0,16  | 0,789363581 | -0,1  | 0,944254689 | -0,67 | 0,156400815 | -0,75 | 0,369835412 |
| Ppp3r1     | 0,09  | 0,944291635 | -0,35 | 0,837419787 | 0,05  | 0,944078985 | 0,59  | 0,688524695 | -0,14 | 0,94480601  |
| Ppp3r2     | -0,23 | 0,531315808 | 0,04  | 0,958545812 | 0,19  | 0,789902399 | -0,1  | 0,837074734 | 0,06  | 0,950677327 |
| Ppp4c      | -0,21 | 0,555287219 | -0,24 | 0,644516897 | 0,12  | 0,83346229  | 0,25  | 0,510589408 | -0,34 | 0,529128921 |
| Ppp4r1     | 0,09  | 0,898746854 | -0,02 | 0,994137877 | 0     | 0,998479656 | 0,51  | 0,313562807 | -0,14 | 0,869729527 |
| Ppp4r1l-ps | 0,09  | 0,935607349 | 0,1   | 0,917821097 | -0,16 | 0,868131096 | -0,73 | 0,303739525 | -0,29 | 0,765419939 |
| Ppp4r2     | 0,19  | 0,701297763 | 0,04  | 0,943436096 | 0,24  | 0,790468311 | 0,23  | 0,528233172 | 0,32  | 0,705953802 |
| Ppp4r4     | 0,05  | 0,962399085 | 0,33  | 0,688706287 | -0,14 | 0,915321116 | -0,41 | 0,31950252  | 0,82  | 0,205902683 |
| Ppp5c      | -0,11 | 0,785491059 | -0,15 | 0,746794144 | 0     | 0,999715683 | 0,1   | 0,779616632 | -0,05 | 0,948935854 |
| Ppp6c      | 0     | 0,997933333 | -0,03 | 0,968437059 | 0     | 0,999151822 | -0,04 | 0,961963439 | 0,13  | 0,873997452 |
| Ppp6r1     | -0,31 | 0,442648859 | -0,13 | 0,821387717 | 0,57  | 0,225514917 | 0,17  | 0,870113725 | 0,12  | 0,933064949 |
| Ppp6r2     | 0,08  | 0,941798404 | -0,29 | 0,814801834 | 0,05  | 0,966359868 | -0,58 | 0,337394458 | -0,58 | 0,452657734 |
| Ppp6r3     | 0,09  | 0,870052902 | 0,18  | 0,716070721 | -0,01 | 0,993686224 | 0,01  | 0,985580087 | 0,33  | 0,561985704 |
| Pprc1      | 0,11  | 0,840909921 | -0,06 | 0,920667104 | 0,26  | 0,715403033 | 0,8   | 0,144530742 | 0,6   | 0,374083269 |
| Ppt1       | 0,48  | 0,235217812 | 0,27  | 0,706028548 | -0,35 | 0,641366948 | -0,2  | 0,53378351  | -0,47 | 0,330314966 |
| Ppt2       | -0,45 | 0,614223987 | -0,34 | 0,843493142 | 0,07  | 0,970803574 | -0,22 | 0,758661926 | -0,26 | 0,794273741 |
| Pptc7      | -0,15 | 0,805313174 | 0,14  | 0,874195024 | -0,1  | 0,940543595 | -0,23 | 0,823795118 | 0,06  | 0,961406182 |
| Ppwd1      | -0,62 | 0,307798337 | -0,06 | 0,969588904 | 0,32  | 0,67074385  | -0,81 | 0,178931682 | -0,63 | 0,32029895  |
| Ppy        | -0,14 | 0,790835803 | 0,03  | 0,958758124 | -0,02 | 0,987003605 | 0,08  | 0,825265029 | 0,2   | 0,717713223 |
| Pqbp1      | -0,38 | 0,533055802 | -0,41 | 0,436251163 | 0,81  | 0,559616081 | 0,14  | 0,70818382  | -0,04 | 0,966951657 |
| Pqlc1      | -0,44 | 0,424255302 | -0,46 | 0,472306822 | 0,59  | 0,339524129 | -0,05 | 0,967216871 | 0,34  | 0,767864084 |
| Pqlc2      | -0,37 | 0,597618709 | -0,38 | 0,467853942 | 0,24  | 0,71773035  | 0,18  | 0,698362346 | -0,89 | 0,093922047 |
| Pqlc3      | -1,39 | 0,393754139 | -0,51 | 0,595287483 | -0,79 | 0,43566321  | -2,47 | 0,039645631 | -1,25 | 0,442579293 |
| Pradc1     | 0     | 1           | -0,18 | 0,911148146 | 0,39  | 0,461600894 | -0,37 | 0,898801714 | 0,01  | 0,997856047 |
| Praf2      | -0,24 | 0,570134815 | -0,36 | 0,405702807 | 0,15  | 0,841739385 | 0,47  | 0,159787901 | -0,05 | 0,947257822 |
| Pram1      | 0,06  | 0,960720096 | -0,14 | 0,852461907 | -0,11 | 0,91803923  | -0,48 | 0,412460103 | -0,01 | 0,994270272 |

|            |       |             |       |             |       |             |       |             |       |             |
|------------|-------|-------------|-------|-------------|-------|-------------|-------|-------------|-------|-------------|
| Prame      | -0,15 | 0,861945506 | 0,28  | 0,812459283 | 0,1   | 0,911506558 | -0,36 | 0,331871707 | 0,29  | 0,675958562 |
| Pramef12   | 0,52  | 0,50199908  | -0,24 | 0,857732355 | 0     | 0,997394645 | 0,8   | 0,338327509 | 0,17  | 0,881135847 |
| Pramef12os | 0,14  | 0,751534367 | 0     | 1           | 0,04  | 0,958885013 | 0,34  | 0,367131023 | 0,1   | 0,915238726 |
| Pramef25   | 0,32  | 0,654203085 | 0,74  | 0,244905942 | -0,22 | 0,804716642 | -0,31 | 0,469292442 | 0,29  | 0,594109073 |
| Pramef8    | 0,04  | 0,971590029 | -0,1  | 0,932292974 | -0,23 | 0,67057407  | -0,79 | 0,144935773 | -0,03 | 0,980945466 |
| Pramel     | 0,25  | 0,839375532 | 0,15  | 0,738199172 | -0,1  | 0,87140695  | -0,08 | 0,852106678 | 0,03  | 0,980945466 |
| Pramel1    | 0,13  | 0,895031891 | -0,11 | 0,927205716 | 0,05  | 0,959990799 | 0,41  | 0,438313935 | -0,29 | 0,759161888 |
| Pramel3    | -0,05 | 0,956452501 | -0,13 | 0,883145635 | -0,21 | 0,733423502 | 0,6   | 0,166727095 | 0,04  | 0,96848659  |
| Pramel5    | 0,43  | 0,412817433 | 0,12  | 0,891785313 | 0,11  | 0,881038168 | -0,18 | 0,648017857 | -0,31 | 0,598035741 |
| Pramel6    | 0,15  | 0,858869926 | -0,08 | 0,952352299 | -0,14 | 0,830639813 | 0,29  | 0,490865019 | 0,5   | 0,269698104 |
| Pramel7    | 0,45  | 0,534017117 | 0,18  | 0,733211124 | 0,23  | 0,730738549 | -0,12 | 0,837258999 | -0,06 | 0,954657649 |
| Prap1      | 0     | 0,999729172 | -0,19 | 0,735769407 | -0,2  | 0,842919139 | -0,05 | 0,946447416 | 0,03  | 0,979483246 |
| Prb1       | 0,91  | 0,17366966  | 1,02  | 0,488525923 | -0,24 | 0,89248624  | -1,12 | 0,101809212 | -0,99 | 0,053570529 |
| Prc1       | -1,48 | 0,142684805 | -1,79 | 0,109572022 | 1,72  | 0,044715282 | 3     | 0,02040845  | -0,12 | 0,947559952 |
| Prcc       | -0,42 | 0,327334001 | 0,05  | 0,948314657 | -0,38 | 0,443039118 | 0,09  | 0,875508638 | -0,29 | 0,54954024  |
| Prccp      | -0,37 | 0,327798253 | -0,39 | 0,431022747 | 0,51  | 0,529715047 | 1,13  | 0,045896661 | -0,03 | 0,978972169 |
| Prdm1      | 0,08  | 0,92234217  | -0,26 | 0,614530823 | -0,26 | 0,665727181 | 2,02  | 0,005240816 | -0,06 | 0,974767202 |
| Prdm10     | -0,06 | 0,932531737 | -0,44 | 0,483436169 | 0,37  | 0,639409113 | 0,02  | 0,982985345 | -0,53 | 0,510689532 |
| Prdm11     | -0,17 | 0,743485447 | -0,24 | 0,808498635 | -0,01 | 0,994130625 | -0,27 | 0,557232733 | -0,4  | 0,538648465 |
| Prdm12     | 0,01  | 0,995150704 | 0,13  | 0,85037533  | -0,07 | 0,963775512 | 0,15  | 0,6882471   | -0,19 | 0,869428633 |
| Prdm13     | -0,02 | 0,97202153  | -0,01 | 0,993398521 | -0,26 | 0,652919303 | 0,3   | 0,328062759 | 0,01  | 0,992997824 |
| Prdm14     | 0,22  | 0,869565514 | -0,23 | 0,742043497 | -0,29 | 0,733423502 | 0,09  | 0,845767749 | 0,07  | 0,960108878 |
| Prdm15     | -0,12 | 0,853138054 | -0,52 | 0,630839743 | -0,18 | 0,79678698  | 0,02  | 0,989985514 | -0,24 | 0,676744294 |
| Prdm16     | -0,76 | 0,13473547  | -0,5  | 0,383826859 | 0,05  | 0,973802765 | -1,35 | 0,023328447 | -0,38 | 0,551972106 |
| Prdm2      | -0,6  | 0,513313111 | -0,17 | 0,938944149 | -0,25 | 0,832752216 | -1,34 | 0,106958367 | -0,22 | 0,829380863 |
| Prdm4      | -0,06 | 0,909290237 | 0,06  | 0,9208542   | 0,34  | 0,47647024  | -0,24 | 0,511135163 | 0,1   | 0,886027227 |
| Prdm5      | -0,62 | 0,560096235 | -0,34 | 0,699910759 | 0,12  | 0,923865263 | 0,76  | 0,072270802 | -0,1  | 0,897038698 |
| Prdm6      | 0,23  | 0,572825051 | 0,85  | 0,490814009 | 0,1   | 0,894339966 | -0,44 | 0,542954051 | 0,15  | 0,891138902 |
| Prdm8      | 0,26  | 0,795659022 | 0,74  | 0,296771606 | -0,41 | 0,619328985 | 0,32  | 0,678009232 | 0,02  | 0,983453096 |
| Prdm9      | 0,39  | 0,640236418 | 0,3   | 0,715688609 | 0,04  | 0,966647226 | -1,34 | 0,045722004 | -0,84 | 0,154629722 |
| Prdx1      | 0     | 0,995013944 | -0,24 | 0,555906531 | 0,5   | 0,456595062 | 0,28  | 0,393737712 | 0,02  | 0,978981442 |
| Prdx2      | -0,22 | 0,562609036 | -0,31 | 0,549813959 | 0,47  | 0,397409278 | 0,79  | 0,057447514 | -0,17 | 0,800560035 |
| Prdx3      | -0,24 | 0,67806773  | -0,47 | 0,415037534 | 0,69  | 0,390844055 | 0,71  | 0,304896332 | -0,3  | 0,777437869 |
| Prdx4      | -0,27 | 0,496123406 | -0,65 | 0,224596043 | 1,35  | 0,016208401 | 0,73  | 0,11992248  | -1,43 | 0,042786521 |
| Prdx5      | 0,11  | 0,841140165 | -0,11 | 0,817110093 | 0,46  | 0,473293361 | 0,43  | 0,18124495  | -0,02 | 0,984831897 |

|           |       |             |       |             |       |             |       |             |       |             |
|-----------|-------|-------------|-------|-------------|-------|-------------|-------|-------------|-------|-------------|
| Prdx6     | -0,38 | 0,374791147 | -0,36 | 0,430868646 | 0,03  | 0,982984296 | 1,07  | 0,031944125 | -0,63 | 0,299637842 |
| Prdx6b    | -0,26 | 0,619979249 | -0,2  | 0,802615172 | -0,28 | 0,715497532 | -0,2  | 0,731281458 | -0,39 | 0,539008425 |
| Preb      | -0,09 | 0,92069393  | -0,07 | 0,943648979 | 0,1   | 0,935654763 | 0,29  | 0,588930505 | 0,22  | 0,783021682 |
| Prelid1   | 0,01  | 0,981357422 | 0,01  | 0,98954147  | 0,44  | 0,374722202 | 1,63  | 0,017534652 | -0,1  | 0,924811768 |
| Prelid2   | 0,47  | 0,641357042 | 0,25  | 0,679757061 | -0,42 | 0,772195664 | 1,54  | 0,036841765 | 0,03  | 0,980904768 |
| Prelp     | -0,07 | 0,9231839   | -0,24 | 0,843645168 | -0,48 | 0,509702247 | -2,24 | 0,004704128 | -1,51 | 0,015668823 |
| Prep      | -0,35 | 0,40518471  | -0,54 | 0,244639773 | 0,96  | 0,044715282 | 1,36  | 0,07960839  | -0,21 | 0,862984047 |
| Prepl     | 0,11  | 0,815908592 | 0,15  | 0,824853794 | 1,66  | 0,199678278 | 0,13  | 0,903739255 | -0,32 | 0,782463903 |
| Prex1     | -1,51 | 0,111767257 | -1,15 | 0,094746093 | 0,89  | 0,157143502 | -0,75 | 0,075079192 | -0,94 | 0,058814936 |
| Prex2     | -0,74 | 0,171930166 | -0,35 | 0,450997698 | 0,24  | 0,764668807 | 0,42  | 0,204179076 | -0,29 | 0,565817768 |
| Prf1      | -0,09 | 0,924674419 | 0,53  | 0,233475985 | -0,75 | 0,194619745 | -1,33 | 0,07392351  | 1,42  | 0,047253015 |
| Prg2      | -0,19 | 0,810208393 | -0,84 | 0,367968212 | 0,67  | 0,423708884 | 0,63  | 0,460251882 | 0,34  | 0,836061657 |
| Prg3      | 0,03  | 0,965991176 | -0,52 | 0,742131414 | -0,02 | 0,980713449 | -0,19 | 0,810252407 | -0,22 | 0,728483022 |
| Prg4      | -0,02 | 0,984972115 | 0,48  | 0,354667412 | -0,09 | 0,958214619 | -0,61 | 0,373645618 | 0     | 0,997856047 |
| Prh1      | 0,24  | 0,735596307 | -0,36 | 0,490062205 | 0,27  | 0,683305382 | 0,44  | 0,310007625 | 0,47  | 0,488057052 |
| Prickle1  | 0,26  | 0,631219977 | 0,54  | 0,277253387 | 0,25  | 0,716022963 | -0,29 | 0,604842873 | -0,18 | 0,799638391 |
| Prickle2  | -0,34 | 0,703946195 | -0,57 | 0,489608385 | 0,07  | 0,961453721 | -1,63 | 0,017048237 | -0,23 | 0,779920985 |
| Prickle3  | -0,41 | 0,729638783 | -0,11 | 0,808842286 | -0,13 | 0,823695413 | 0,57  | 0,113591681 | -0,69 | 0,140961739 |
| Prickle4  | 0,22  | 0,660215768 | 0,01  | 0,996105203 | 0,01  | 0,993686224 | -0,41 | 0,235121784 | -0,06 | 0,948935854 |
| Prim1     | -0,59 | 0,474293292 | -1,48 | 0,094438943 | 1,41  | 0,293036801 | 0,21  | 0,812625466 | -0,57 | 0,447304786 |
| Prim2     | -0,57 | 0,24489967  | -1,13 | 0,356307531 | 1,47  | 0,049219704 | 0,9   | 0,454429111 | -0,43 | 0,782463903 |
| Prima1    | -0,09 | 0,913546177 | 0,05  | 0,961850501 | -0,5  | 0,322706681 | 0,21  | 0,670124154 | 0,01  | 0,992370267 |
| Primpol   | -0,62 | 0,414844288 | -0,42 | 0,544440118 | 1,45  | 0,103498913 | 0,24  | 0,647512496 | 0,07  | 0,947894004 |
| Prkaa1    | -0,13 | 0,790449291 | 0,02  | 0,974159037 | 0,27  | 0,823823322 | -0,33 | 0,325152977 | 0,14  | 0,827032122 |
| Prkaa2    | -0,16 | 0,865381242 | 0,62  | 0,624712123 | 0,22  | 0,873740233 | -1,73 | 0,074454367 | -0,09 | 0,948375237 |
| Prkab1    | 0,1   | 0,835405222 | 0,03  | 0,966717367 | 0,07  | 0,917672398 | -0,41 | 0,368003521 | -0,07 | 0,938160837 |
| Prkab2    | 0,32  | 0,707480624 | 0,18  | 0,840044986 | -0,36 | 0,588987171 | 0,4   | 0,618453093 | 0,29  | 0,807620467 |
| Prkaca    | -0,6  | 0,249196594 | -0,62 | 0,350749298 | 0,65  | 0,542580907 | 0,49  | 0,527104424 | -0,5  | 0,502903447 |
| Prkacb    | -0,36 | 0,417482906 | 0     | 1           | 0,6   | 0,4706823   | 1,29  | 0,36494482  | -0,01 | 0,997981094 |
| Prkag1    | -0,49 | 0,336229721 | -0,41 | 0,49125334  | 0,53  | 0,446493846 | -0,05 | 0,963752888 | 0,02  | 0,99004065  |
| Prkag2    | -0,74 | 0,327334001 | -0,16 | 0,791549354 | 0,06  | 0,966910505 | -0,76 | 0,15999424  | -0,93 | 0,155943615 |
| Prkag2os1 | 0,27  | 0,451211285 | 0,23  | 0,627230934 | -0,38 | 0,611144549 | 0,12  | 0,793099857 | 0,19  | 0,864373858 |
| Prkag3    | -0,24 | 0,704646948 | 0,34  | 0,625875078 | 0,05  | 0,966297296 | -0,17 | 0,665234661 | -0,54 | 0,550029503 |
| Prkar1a   | -0,4  | 0,253982932 | -0,21 | 0,636735022 | 0,15  | 0,85952125  | 0,3   | 0,60273248  | -0,1  | 0,917356423 |
| Prkar1b   | -0,11 | 0,889323552 | -0,06 | 0,970008914 | -0,18 | 0,814632182 | -0,26 | 0,799835488 | 0,23  | 0,82823489  |

|         |       |             |       |             |       |             |       |             |       |             |
|---------|-------|-------------|-------|-------------|-------|-------------|-------|-------------|-------|-------------|
| Prkar2a | -0,82 | 0,318333634 | -1,01 | 0,195387645 | -0,28 | 0,66672322  | -0,37 | 0,326072182 | -0,91 | 0,248762416 |
| Prkar2b | -0,75 | 0,275555706 | 0,87  | 0,629493333 | 0,18  | 0,894339966 | -1,57 | 0,08259808  | 1,22  | 0,194842375 |
| Prkca   | 0,76  | 0,233235566 | 0,11  | 0,950486453 | 0,7   | 0,619328985 | 0     | 0,999809258 | -0,38 | 0,607021246 |
| Prkcb   | -0,89 | 0,085831462 | -0,25 | 0,793603525 | -0,03 | 0,98934091  | 0,09  | 0,94976969  | -0,61 | 0,534755057 |
| Prkcd   | -0,37 | 0,574608525 | -0,22 | 0,724005117 | 1,26  | 0,021697104 | 0,23  | 0,857884225 | 0,1   | 0,950267521 |
| Prkcdbp | 0,19  | 0,687662951 | 0,11  | 0,802423576 | -0,04 | 0,955742302 | 0,45  | 0,248530936 | -0,11 | 0,884248437 |
| Prkce   | 0,02  | 0,98456417  | -0,19 | 0,816547051 | -0,25 | 0,770526999 | -0,58 | 0,333184928 | -0,09 | 0,92519473  |
| Prkcg   | 0,35  | 0,610662221 | -0,09 | 0,943713379 | 0,13  | 0,939097402 | 1,59  | 0,161809117 | -0,49 | 0,661829904 |
| Prkch   | 0,28  | 0,419481733 | 0,06  | 0,925843899 | 0,09  | 0,912968686 | -0,22 | 0,670124154 | -0,24 | 0,751523405 |
| Prkci   | -0,19 | 0,797266879 | -0,31 | 0,643182627 | 0,71  | 0,134533927 | 0,3   | 0,328951659 | 0,13  | 0,884248437 |
| Prkcq   | 0,94  | 0,301547911 | 0,85  | 0,302028989 | -0,6  | 0,387442723 | -2,64 | 0,005771813 | 1,32  | 0,020118827 |
| Prkcsh  | -0,35 | 0,36631183  | -0,45 | 0,275147283 | 0,32  | 0,500021746 | 0,89  | 0,077565667 | -0,24 | 0,734042268 |
| Prkcz   | -0,26 | 0,765114233 | -0,41 | 0,677026666 | 0,29  | 0,555425727 | -0,07 | 0,869855587 | 0,34  | 0,497275196 |
| Prkd1   | -0,68 | 0,36631183  | -0,17 | 0,886901579 | -0,63 | 0,435556279 | -1,45 | 0,072703707 | -0,62 | 0,459584226 |
| Prkd2   | -0,26 | 0,65525391  | 0,26  | 0,775914311 | -0,24 | 0,688126003 | 0,07  | 0,91152705  | -0,07 | 0,948163009 |
| Prkd3   | -0,58 | 0,601533006 | -0,24 | 0,787285346 | 0,45  | 0,644036028 | -0,35 | 0,425668174 | 0,19  | 0,788659175 |
| Prkdc   | 0,06  | 0,939308558 | -0,15 | 0,850776298 | 0     | 0,997581017 | -0,21 | 0,665208114 | -0,4  | 0,469148703 |
| Prkg1   | -0,06 | 0,962254712 | 0,11  | 0,930983876 | -0,35 | 0,564959976 | -2,45 | 0,020013024 | -1,12 | 0,057592686 |
| Prkg2   | -0,05 | 0,954648978 | 0,09  | 0,861862086 | 0,29  | 0,728502118 | -0,58 | 0,324794827 | 0,03  | 0,984125319 |
| Prkra   | -0,26 | 0,625617202 | -0,33 | 0,664446076 | 0,34  | 0,707539555 | 0,18  | 0,665234661 | -0,57 | 0,282689685 |
| Prkrip1 | 0,13  | 0,829299665 | 0,38  | 0,487771533 | 0,2   | 0,829285065 | 0,45  | 0,606590988 | 0,6   | 0,449691223 |
| Prkrir  | -0,18 | 0,84241758  | -0,1  | 0,88741189  | 0,5   | 0,544685344 | -0,16 | 0,687605168 | -0,13 | 0,894623317 |
| Prkx    | -0,11 | 0,847000357 | -0,06 | 0,925195039 | -0,2  | 0,823823322 | -0,39 | 0,378102359 | 0,36  | 0,520240481 |
| Prl     | -0,27 | 0,737459992 | 0,47  | 0,571667144 | -0,14 | 0,880314343 | -0,12 | 0,810891431 | 0,02  | 0,985982505 |
| Prl2a1  | -0,06 | 0,957277205 | -0,47 | 0,724196236 | 0     | 0,998185389 | 0,47  | 0,610149813 | 0,15  | 0,868602248 |
| Prl2b1  | 0,03  | 0,980913066 | 0,15  | 0,873628464 | -0,09 | 0,914134206 | -0,06 | 0,921731995 | 0     | 0,994265717 |
| Prl2c1  | 0,15  | 0,849497    | 0,43  | 0,536246395 | -0,3  | 0,723002297 | 0,08  | 0,952615547 | 0,87  | 0,291479039 |
| Prl2c5  | 0,41  | 0,773078788 | 1     | 0,30005675  | -0,48 | 0,840294913 | -1,22 | 0,217107326 | 0     | 0,998332822 |
| Prl3a1  | 0,54  | 0,407600798 | -0,12 | 0,831685312 | -0,04 | 0,961337501 | 0,62  | 0,169538994 | 0,19  | 0,813151491 |
| Prl3b1  | -0,52 | 0,323050837 | -0,23 | 0,75380926  | -0,11 | 0,890702663 | -0,02 | 0,991001566 | -0,35 | 0,726042963 |
| Prl3c1  | 0,3   | 0,518267881 | 0,33  | 0,514781187 | -0,1  | 0,892560908 | 0,05  | 0,929835301 | 0,3   | 0,699060093 |
| Prl3d1  | -0,19 | 0,686076441 | -0,31 | 0,883093763 | -0,45 | 0,637835827 | -0,73 | 0,084374314 | -0,07 | 0,966257185 |
| Prl3d2  | 0,53  | 0,600313897 | -0,1  | 0,955302758 | -0,75 | 0,695705149 | 0,2   | 0,786202101 | -0,02 | 0,987760164 |
| Prl3d3  | -0,42 | 0,567097187 | 0,49  | 0,716725804 | -0,8  | 0,141799139 | -0,3  | 0,708385284 | -0,06 | 0,970571301 |
| Prl4a1  | 0,11  | 0,882119027 | -0,12 | 0,8555269   | 0,08  | 0,911634383 | -0,57 | 0,198447986 | -0,2  | 0,774843529 |



|        |       |             |       |             |       |             |       |             |       |             |
|--------|-------|-------------|-------|-------------|-------|-------------|-------|-------------|-------|-------------|
| Prl5a1 | 0,12  | 0,823108731 | 0,03  | 0,969019461 | -0,17 | 0,867152476 | 0,53  | 0,604842873 | 0,11  | 0,888252054 |
| Prl6a1 | 0,03  | 0,983500773 | 0,23  | 0,841952469 | 0,16  | 0,765490406 | -0,01 | 0,993337409 | -0,12 | 0,904931004 |
| Prl7a1 | -0,04 | 0,958512892 | -0,43 | 0,73623784  | 0,35  | 0,647707415 | 0,4   | 0,562758592 | 0,47  | 0,587915673 |
| Prl7a2 | 0,03  | 0,960887203 | 0     | 0,997207127 | -0,41 | 0,546286708 | -0,31 | 0,621188453 | -0,19 | 0,777561251 |
| Prl7b1 | 0,15  | 0,803761785 | -0,64 | 0,340147286 | -0,17 | 0,818228357 | 0,05  | 0,950279109 | 0,26  | 0,711169781 |
| Prl7c1 | 0,2   | 0,783068584 | 0,13  | 0,864958331 | 0,06  | 0,943365715 | -0,11 | 0,864867788 | -0,11 | 0,901886776 |
| Prl7d1 | 0,02  | 0,984040323 | 0,11  | 0,845663274 | -0,16 | 0,837088175 | -0,14 | 0,711064066 | 0,1   | 0,893439982 |
| Prl8a1 | -0,15 | 0,842292335 | -0,17 | 0,881171171 | -0,05 | 0,958053446 | 0,03  | 0,967866794 | -0,1  | 0,928775639 |
| Prl8a2 | -0,15 | 0,768809729 | 0,01  | 0,995432085 | 0     | 0,999226138 | -0,09 | 0,854613369 | 0,31  | 0,644533534 |
| Prl8a6 | -0,04 | 0,957427783 | -0,04 | 0,959837002 | -0,21 | 0,761848269 | 0,14  | 0,77314251  | 0,22  | 0,746065878 |
| Prl8a8 | 0,06  | 0,954304516 | -0,07 | 0,934280572 | -0,18 | 0,764615262 | 0,29  | 0,625019874 | 0,09  | 0,927536545 |
| Prl8a9 | 0,4   | 0,422128396 | 0,21  | 0,775914311 | 0,03  | 0,971806083 | 0,08  | 0,885406691 | 0,26  | 0,821140509 |
| Prlh   | 0,07  | 0,911714617 | 0,01  | 0,990654073 | -0,1  | 0,90672161  | -0,05 | 0,907406741 | -0,14 | 0,823098095 |
| Prlhr  | -0,01 | 0,986831213 | -0,26 | 0,697111597 | -0,15 | 0,821089748 | -0,04 | 0,927360713 | 0,15  | 0,863049278 |
| Prlr   | 0,09  | 0,913550089 | 0,22  | 0,738762579 | -0,34 | 0,609874967 | -0,2  | 0,718433562 | 0,14  | 0,890957032 |
| Prm1   | 0,65  | 0,239601221 | 0,19  | 0,694017753 | -0,25 | 0,641775458 | 0,55  | 0,148514477 | 0,51  | 0,452376077 |
| Prm2   | 0,03  | 0,958013568 | 0,02  | 0,976556019 | 0     | 0,997816755 | -0,1  | 0,825017636 | 0,12  | 0,86229485  |
| Prm3   | 0,04  | 0,948376096 | -0,05 | 0,922703368 | -0,08 | 0,914965671 | 0,31  | 0,352580891 | 0,1   | 0,88321585  |
| Prmt1  | -0,48 | 0,27550648  | -0,22 | 0,800634019 | 0,58  | 0,209534486 | 0,7   | 0,296991546 | -0,48 | 0,488332709 |
| Prmt2  | -0,89 | 0,083421478 | 0,26  | 0,842430108 | -0,08 | 0,955303601 | -0,19 | 0,898628138 | -0,27 | 0,867093565 |
| Prmt3  | -0,51 | 0,677689915 | -0,36 | 0,795064681 | 0,26  | 0,837003818 | 0,3   | 0,635378562 | -0,38 | 0,705203579 |
| Prmt5  | 0,25  | 0,619738681 | 0,06  | 0,9381453   | 0,5   | 0,469053827 | 1,43  | 0,014017268 | 0,18  | 0,818414638 |
| Prmt6  | -0,38 | 0,561977827 | 0,06  | 0,947746481 | 0,5   | 0,655876476 | 0,19  | 0,571621443 | -0,02 | 0,988374688 |
| Prmt7  | -0,6  | 0,153132474 | -0,18 | 0,853193813 | 0,68  | 0,411161502 | 0,21  | 0,804185549 | -0,55 | 0,531168722 |
| Prmt8  | -0,23 | 0,693610566 | 0,09  | 0,935329426 | -0,16 | 0,862441091 | 0,08  | 0,919062567 | -0,17 | 0,890297784 |
| Prmt9  | -0,4  | 0,585780254 | 0,61  | 0,365633433 | 0,33  | 0,757980709 | -0,3  | 0,71459805  | 0,54  | 0,623555129 |
| Prn    | -0,7  | 0,247254947 | -0,4  | 0,763796207 | 0,38  | 0,602259493 | 1,52  | 0,081798501 | 0,1   | 0,915363101 |
| Prnd   | -2,13 | 0,164433966 | -1,84 | 0,040620931 | 1,77  | 0,076696168 | 3,71  | 0,004464713 | -0,12 | 0,94920559  |
| Prnp   | -0,45 | 0,25061917  | -0,22 | 0,646073473 | 0,43  | 0,452731181 | 2,06  | 0,004704128 | 0,67  | 0,159047845 |
| Prob1  | -0,35 | 0,464543995 | -0,34 | 0,555137972 | -0,2  | 0,70398922  | -0,09 | 0,845785501 | 0,09  | 0,938464659 |
| Proc   | 0,33  | 0,479545376 | 0,32  | 0,39909134  | 0,13  | 0,847506224 | -0,11 | 0,864379203 | 0,38  | 0,48229889  |
| Proca1 | 0,11  | 0,919556852 | -0,21 | 0,726544986 | 0,07  | 0,964509282 | -0,45 | 0,274415093 | -0,61 | 0,585244465 |
| Procr  | 0,24  | 0,687694204 | 0,13  | 0,823246376 | -0,5  | 0,31559267  | 0,03  | 0,965653854 | 0,17  | 0,813513601 |
| Prodh  | -0,24 | 0,648730873 | -0,01 | 0,996113371 | -0,29 | 0,713202106 | 0,42  | 0,311862689 | 0,25  | 0,77360786  |
| Prodh2 | -0,06 | 0,942119638 | 0,19  | 0,77325041  | -0,03 | 0,970387898 | 0,02  | 0,978056041 | 0,14  | 0,865258929 |

|         |       |             |       |             |       |             |       |             |       |             |
|---------|-------|-------------|-------|-------------|-------|-------------|-------|-------------|-------|-------------|
| Prok1   | -0,32 | 0,421378808 | -0,17 | 0,92856048  | 0,49  | 0,313065218 | -0,34 | 0,915185029 | -0,81 | 0,697757911 |
| Prok2   | 0,09  | 0,921306075 | 0,21  | 0,695823136 | -0,09 | 0,924900978 | 0,1   | 0,886243506 | 0,25  | 0,689405962 |
| Prokr1  | 0,51  | 0,579700869 | -0,57 | 0,328485456 | -0,13 | 0,880706627 | 0,95  | 0,13409404  | 0,12  | 0,887719506 |
| Prokr2  | 0,05  | 0,970463755 | 0,41  | 0,653492327 | -0,02 | 0,993379272 | 0,84  | 0,223973894 | 0,01  | 0,9939542   |
| Prol1   | 0,04  | 0,948291116 | 0,02  | 0,977697653 | -0,38 | 0,534288874 | 0,12  | 0,880509704 | 0,15  | 0,860591136 |
| Prom1   | -0,39 | 0,666117459 | 0,05  | 0,965408307 | -0,55 | 0,682285387 | -4,57 | 0,009399265 | 1,09  | 0,313577247 |
| Prom2   | -0,19 | 0,860985365 | 0,71  | 0,311099792 | -0,22 | 0,824084853 | -0,56 | 0,383084151 | 0,07  | 0,947733697 |
| Prop1   | -0,39 | 0,383471252 | 0,35  | 0,808422093 | -0,26 | 0,661220717 | -0,19 | 0,867327088 | 0,27  | 0,826379382 |
| Prorsd1 | 0,08  | 0,917014629 | 0,05  | 0,954024651 | -0,09 | 0,891175722 | 0,03  | 0,949166455 | 0,1   | 0,885872093 |
| Pros1   | 0,52  | 0,245256073 | 0,31  | 0,662134711 | 0,21  | 0,857466061 | -0,21 | 0,642212952 | 0,6   | 0,208570676 |
| Prosc   | 0,35  | 0,486906643 | -0,01 | 0,990052916 | 0,09  | 0,887446966 | -0,03 | 0,951765845 | 0,2   | 0,728388857 |
| Proscos | 0,03  | 0,982432452 | 0,03  | 0,986782918 | -0,07 | 0,940068173 | -0,01 | 0,995662115 | 0,41  | 0,675282484 |
| Proser1 | -0,24 | 0,61379872  | -0,05 | 0,94602222  | -0,55 | 0,260217755 | 0,17  | 0,825017636 | -0,28 | 0,765327693 |
| Proser2 | -0,17 | 0,840621481 | -0,02 | 0,993789602 | 0,21  | 0,810825081 | 0,24  | 0,675509337 | 0,2   | 0,824818547 |
| Proser3 | 0,16  | 0,905119661 | -0,42 | 0,520949685 | 0,49  | 0,560191012 | 0,11  | 0,852737306 | -0,37 | 0,745134899 |
| Prox1   | 0,62  | 0,602160482 | -0,52 | 0,509013394 | -0,4  | 0,683975246 | -1,18 | 0,287655446 | -0,57 | 0,658984305 |
| Prox2   | -0,2  | 0,703606438 | -0,05 | 0,970832543 | 0,27  | 0,633836862 | 0,22  | 0,651882106 | -0,47 | 0,497315775 |
| Proz    | 0,35  | 0,648730873 | -0,29 | 0,819822094 | 0,51  | 0,522647517 | -0,44 | 0,62296101  | -0,81 | 0,230954385 |
| Prpf18  | 0,12  | 0,832696131 | 0,08  | 0,9152526   | 0,02  | 0,985326269 | -0,25 | 0,511191926 | -0,05 | 0,952718905 |
| Prpf19  | -0,54 | 0,422422592 | -0,38 | 0,807100558 | 0,19  | 0,901286451 | 0,43  | 0,407097145 | -0,1  | 0,93193727  |
| Prpf3   | -0,69 | 0,356646108 | 0,04  | 0,935984823 | 0,02  | 0,991451381 | -0,26 | 0,71050512  | 0,26  | 0,763240477 |
| Prpf31  | -0,48 | 0,259797168 | 0,03  | 0,973365651 | -0,12 | 0,939684708 | 0,54  | 0,445338764 | 0,54  | 0,447019099 |
| Prpf38a | 0,08  | 0,892176461 | 0,43  | 0,419271797 | 0,16  | 0,766528794 | -0,41 | 0,195655765 | 0,71  | 0,101648764 |
| Prpf38b | 0,43  | 0,454879294 | 0,28  | 0,641804702 | -0,35 | 0,587531732 | -0,85 | 0,146247596 | -0,12 | 0,931519966 |
| Prpf39  | 0,75  | 0,153824107 | -0,14 | 0,866248527 | -0,38 | 0,698451287 | 0,41  | 0,835215633 | 0,46  | 0,823098095 |
| Prpf4   | -0,8  | 0,164698985 | -0,2  | 0,656294004 | 0,39  | 0,628902187 | 0,39  | 0,598473186 | -0,36 | 0,725475933 |
| Prpf40a | -0,25 | 0,701086418 | -0,35 | 0,569612894 | 0,67  | 0,109628477 | 0,68  | 0,175621807 | 0,39  | 0,475212645 |
| Prpf40b | 0,05  | 0,966775766 | -0,25 | 0,641804702 | 0,02  | 0,987007223 | -0,71 | 0,167766415 | -0,58 | 0,452944342 |
| Prpf4b  | 0,01  | 0,995230791 | 0,23  | 0,58591598  | -0,34 | 0,746397133 | -0,04 | 0,980883383 | 0,12  | 0,950267521 |
| Prpf6   | -0,05 | 0,946976046 | -0,11 | 0,901352701 | -0,08 | 0,933880691 | -0,48 | 0,371339886 | -0,21 | 0,773401088 |
| Prpf8   | -0,39 | 0,359023627 | -0,26 | 0,602549494 | 0,39  | 0,542398079 | -0,1  | 0,810243982 | -0,09 | 0,894623317 |
| Prph    | -0,24 | 0,721484809 | 0,28  | 0,487843882 | 0,08  | 0,918291931 | -0,45 | 0,172833081 | 0,01  | 0,992406971 |
| Prph2   | -0,06 | 0,94913976  | -0,08 | 0,931647467 | -0,01 | 0,991240121 | 0,05  | 0,947167456 | -0,11 | 0,93193727  |
| Prpmp5  | -0,1  | 0,879743728 | -0,01 | 0,99687092  | -0,2  | 0,810825081 | -0,12 | 0,893255574 | -0,15 | 0,891443616 |
| Prps1   | -0,77 | 0,094134789 | -0,96 | 0,10752682  | 0,56  | 0,21870601  | -0,74 | 0,144044949 | -0,53 | 0,246316824 |

|         |       |             |       |             |       |             |       |             |       |             |
|---------|-------|-------------|-------|-------------|-------|-------------|-------|-------------|-------|-------------|
| Prps1l1 | 0     | 0,999620531 | 0,41  | 0,498246237 | -0,18 | 0,761861872 | -0,22 | 0,566395277 | -0,24 | 0,81375759  |
| Prps1l3 | -0,62 | 0,305893528 | -0,12 | 0,903595287 | 0,83  | 0,143198149 | -0,37 | 0,742883159 | -0,6  | 0,538811506 |
| Prps2   | -0,93 | 0,376151377 | -0,87 | 0,163138551 | 0,6   | 0,557290334 | 0,06  | 0,970163463 | -1,03 | 0,30479841  |
| Prpsap1 | -0,32 | 0,771381752 | 0,15  | 0,89339044  | 0,08  | 0,959437564 | -0,1  | 0,909976349 | 0     | 0,999572304 |
| Prpsap2 | -0,73 | 0,576555049 | 0,33  | 0,8116982   | 0,91  | 0,590832576 | -1,68 | 0,093418481 | -0,38 | 0,713387947 |
| Prr11   | -1,59 | 0,189684245 | -2,14 | 0,11699159  | 2,61  | 0,212291286 | 2,86  | 0,014017268 | -0,91 | 0,244965154 |
| Prr12   | -0,38 | 0,688503606 | -0,9  | 0,100428178 | 0,53  | 0,219362501 | 0,02  | 0,977351583 | -0,36 | 0,563213699 |
| Prr13   | 0,33  | 0,553920143 | 0,25  | 0,565639972 | -0,61 | 0,343594254 | 0,49  | 0,368956303 | 0,15  | 0,86946865  |
| Prr14   | 0,25  | 0,571926173 | -0,01 | 0,992909697 | -0,25 | 0,663585217 | -0,25 | 0,573970842 | 0,3   | 0,623651771 |
| Prr14l  | -0,35 | 0,460231397 | -0,22 | 0,696329013 | -0,14 | 0,909963525 | 0,35  | 0,392258707 | -0,07 | 0,944070399 |
| Prr15   | 0,25  | 0,69656531  | 0     | 1           | -0,09 | 0,912268947 | -1,03 | 0,032043244 | 0,46  | 0,299377583 |
| Prr15l  | 0,15  | 0,769221984 | -0,11 | 0,840864779 | 0,05  | 0,940335002 | -0,16 | 0,623890837 | -0,15 | 0,81954505  |
| Prr16   | 0,16  | 0,738448626 | 0,07  | 0,925843899 | -0,19 | 0,770526999 | -0,31 | 0,4043538   | -0,33 | 0,560254537 |
| Prr18   | -0,07 | 0,922591969 | 0,16  | 0,760742789 | -0,46 | 0,368620918 | 0,51  | 0,346018446 | 0,27  | 0,724432778 |
| Prr19   | -0,13 | 0,761425175 | -0,11 | 0,86410431  | 0,18  | 0,752954039 | 0,33  | 0,390869984 | 0,17  | 0,820657685 |
| Prr22   | -0,07 | 0,903817676 | 0,11  | 0,829923566 | -0,14 | 0,865545635 | -0,02 | 0,969963471 | 0     | 0,994774512 |
| Prr23a1 | 0,09  | 0,958512892 | 0,01  | 0,998239324 | -0,08 | 0,95204022  | -0,17 | 0,818919506 | -0,36 | 0,525018839 |
| Prr23a2 | 0     | 0,997266885 | -0,17 | 0,802979985 | 0,16  | 0,730066852 | 0,02  | 0,968236759 | -0,21 | 0,723883531 |
| Prr23a3 | 0,4   | 0,443047489 | 0,22  | 0,841090266 | -0,34 | 0,564103482 | 0,23  | 0,665334658 | 0,04  | 0,97757951  |
| Prr27   | -0,04 | 0,955394263 | 0,24  | 0,732044571 | -0,01 | 0,993379272 | -0,38 | 0,697380385 | -0,02 | 0,980961333 |
| Prr29   | 0,14  | 0,874187979 | 0,35  | 0,741939956 | -0,35 | 0,568619313 | -0,08 | 0,921929178 | -0,22 | 0,768818896 |
| Prr3    | -0,14 | 0,837491089 | -0,03 | 0,962980292 | -0,06 | 0,947316802 | 0,12  | 0,831764227 | 0,15  | 0,85508146  |
| Prr30   | -0,3  | 0,670656388 | -0,03 | 0,974223336 | -0,16 | 0,859460126 | 0,06  | 0,899335603 | 0,17  | 0,804809514 |
| Prr32   | 0,12  | 0,813220024 | -0,02 | 0,99305294  | 0,12  | 0,844854601 | 0,01  | 0,979420434 | -0,24 | 0,718299139 |
| Prr33   | 0,3   | 0,72142505  | 0,42  | 0,606866408 | -0,31 | 0,666060145 | -0,47 | 0,588433913 | -0,23 | 0,778593926 |
| Prr36   | -0,55 | 0,257353199 | 0,16  | 0,816121519 | -0,05 | 0,949858985 | -0,09 | 0,894514108 | -0,14 | 0,843351909 |
| Prr5    | -0,89 | 0,182485328 | -0,93 | 0,18729601  | 0,38  | 0,66899373  | 2,69  | 0,009073953 | -1,14 | 0,083229644 |
| Prr5l   | -0,24 | 0,724829885 | 0,29  | 0,689891347 | 0,45  | 0,58866381  | 1,13  | 0,087498852 | 0,63  | 0,523861129 |
| Prr7    | 0,18  | 0,777335496 | -0,22 | 0,716668427 | -0,16 | 0,814956693 | 0,25  | 0,540951246 | 0,04  | 0,96738578  |
| Prr9    | -0,11 | 0,882119027 | 0,05  | 0,96172404  | -0,06 | 0,947046995 | 0,32  | 0,523262994 | 0,27  | 0,746512314 |
| Prrc1   | -0,03 | 0,965444591 | -0,11 | 0,86410431  | 0,81  | 0,24320522  | 1,33  | 0,056329918 | 0,09  | 0,939930189 |
| Prrc2a  | -0,14 | 0,763737282 | -0,11 | 0,839789639 | 0,07  | 0,945825735 | 0,17  | 0,630104458 | 0,01  | 0,990091016 |
| Prrc2b  | -0,19 | 0,682923931 | -0,26 | 0,615698474 | 0,09  | 0,896181325 | -0,12 | 0,84134133  | -0,54 | 0,329762864 |
| Prrc2c  | -0,05 | 0,932713291 | -0,16 | 0,771641267 | 0,09  | 0,917694073 | 0,01  | 0,979829655 | 0,21  | 0,729457433 |
| Prrg1   | -0,63 | 0,560965941 | -0,01 | 0,998754213 | -0,75 | 0,342313446 | -1,44 | 0,040766126 | -0,25 | 0,676132909 |

|          |       |             |       |             |       |             |       |             |       |             |
|----------|-------|-------------|-------|-------------|-------|-------------|-------|-------------|-------|-------------|
| Prrg2    | 0,06  | 0,962030279 | 0,33  | 0,824691053 | 0,07  | 0,969247498 | 0,45  | 0,57069357  | 0,26  | 0,825518917 |
| Prrg3    | -0,68 | 0,312439966 | -0,66 | 0,233475985 | 0,2   | 0,820881741 | 3,79  | 0,005660788 | -0,19 | 0,854494093 |
| Prrg4    | 0,92  | 0,355690795 | 0,88  | 0,362448332 | 1,45  | 0,129488115 | 0,87  | 0,281334869 | 2,14  | 0,020323407 |
| Prrt1    | -0,07 | 0,949241841 | 0,27  | 0,843162191 | -0,35 | 0,638689491 | -0,2  | 0,856459981 | 0,52  | 0,523459737 |
| Prrt2    | 0,53  | 0,520545783 | -0,17 | 0,911024505 | 0,06  | 0,953265007 | 0,12  | 0,899335603 | 0,21  | 0,738853855 |
| Prrt3    | 0,37  | 0,617280733 | 0,06  | 0,961080918 | -0,46 | 0,69297088  | -0,15 | 0,873812847 | -0,32 | 0,726042963 |
| Prrt4    | -0,06 | 0,946792769 | -0,22 | 0,659883931 | -0,43 | 0,527929204 | -0,95 | 0,110493709 | -0,35 | 0,74933755  |
| Prrx1    | -0,09 | 0,963914207 | 0,65  | 0,231183878 | -0,04 | 0,96080423  | -0,02 | 0,986795948 | 0     | 0,998332822 |
| Prrx2    | -0,34 | 0,410498707 | -0,27 | 0,691433995 | 0,12  | 0,904132011 | 0,2   | 0,522986431 | 0     | 0,998704075 |
| Prrxl1   | -0,05 | 0,963378584 | 0     | 1           | -0,09 | 0,935446084 | 0,38  | 0,577360837 | 0,09  | 0,948935854 |
| Prss1    | 0,36  | 0,600680579 | 1,22  | 0,246675259 | 0,21  | 0,864598204 | -1,05 | 0,139727753 | 0,49  | 0,738853855 |
| Prss12   | -0,67 | 0,25387015  | 0,47  | 0,661734303 | -0,05 | 0,967930981 | 0,11  | 0,86062001  | 0,05  | 0,951471487 |
| Prss16   | 0,05  | 0,973083901 | 0,31  | 0,541518605 | 0,17  | 0,868798569 | -0,32 | 0,568294189 | -0,39 | 0,760587652 |
| Prss2    | 0,47  | 0,357054834 | 0,36  | 0,656542439 | -0,26 | 0,761861872 | 0,02  | 0,987247308 | 0,12  | 0,917347603 |
| Prss21   | 0,22  | 0,647841253 | 0,12  | 0,906267371 | 0,2   | 0,775367269 | -0,3  | 0,43636337  | -0,33 | 0,598277181 |
| Prss22   | -0,63 | 0,172698611 | -0,64 | 0,490062205 | 0,38  | 0,642735909 | 1,03  | 0,0456902   | 0,04  | 0,97425848  |
| Prss23   | -0,76 | 0,305893528 | -1,11 | 0,224596043 | 1,13  | 0,257583104 | 1,69  | 0,151431819 | 0,32  | 0,819072786 |
| Prss23os | -0,51 | 0,454303769 | -0,48 | 0,385935063 | 0,47  | 0,805083999 | 1,78  | 0,235415565 | 0,39  | 0,912022175 |
| Prss27   | -0,29 | 0,720829271 | 0,26  | 0,842145037 | 0,41  | 0,64759465  | -0,26 | 0,477286312 | 0     | 0,997106233 |
| Prss28   | 0,16  | 0,882500171 | -0,1  | 0,967932183 | -0,28 | 0,647988621 | 0,21  | 0,862759749 | 0,29  | 0,759948291 |
| Prss29   | 0,54  | 0,316599006 | -0,03 | 0,983109895 | -0,23 | 0,844258774 | 0,57  | 0,404727811 | 0,21  | 0,745134899 |
| Prss30   | -0,09 | 0,869565514 | 0,32  | 0,638366221 | 0,03  | 0,982648972 | 0,14  | 0,776054059 | 0,22  | 0,736133095 |
| Prss32   | -0,73 | 0,109917869 | -0,32 | 0,416635312 | -0,13 | 0,841563482 | 0,33  | 0,681973385 | -0,1  | 0,945126078 |
| Prss33   | 0,3   | 0,64776317  | -0,12 | 0,82505545  | 0,13  | 0,864598204 | 0,63  | 0,210401797 | 0,35  | 0,561919796 |
| Prss34   | 0,17  | 0,721378796 | 0,11  | 0,831404974 | -0,06 | 0,961800548 | 0,29  | 0,750440448 | 0,59  | 0,350037461 |
| Prss35   | -0,49 | 0,390360486 | -0,23 | 0,888313976 | 0,44  | 0,442143315 | 0,13  | 0,873610553 | -0,75 | 0,330057248 |
| Prss36   | 0,25  | 0,602160482 | 0,56  | 0,392639085 | -0,12 | 0,869074305 | -0,04 | 0,964803155 | -0,02 | 0,985269236 |
| Prss37   | -0,08 | 0,940758951 | 0,31  | 0,800191117 | -0,1  | 0,912268947 | -0,33 | 0,356280969 | -0,15 | 0,937661951 |
| Prss38   | 0,01  | 0,992406613 | -0,29 | 0,629834033 | -0,24 | 0,661089127 | 0,37  | 0,614547765 | 0,26  | 0,817563348 |
| Prss39   | -0,29 | 0,676906193 | 0,19  | 0,910688765 | -0,24 | 0,686625108 | -0,02 | 0,982117419 | -0,36 | 0,745574572 |
| Prss40   | -0,06 | 0,94670097  | -0,01 | 0,99130752  | 0,18  | 0,771418177 | -0,03 | 0,968527235 | -0,29 | 0,694326198 |
| Prss41   | -0,16 | 0,813220024 | 0,18  | 0,855632384 | -0,05 | 0,94968597  | -0,08 | 0,896849984 | 0,37  | 0,533119029 |
| Prss42   | 0,11  | 0,820023436 | -0,02 | 0,984121306 | -0,1  | 0,903609828 | -0,05 | 0,926704232 | 0,04  | 0,971058066 |
| Prss43   | 0,59  | 0,286082815 | -0,34 | 0,84786877  | 0,06  | 0,950846671 | 0,47  | 0,405021536 | 0,42  | 0,398637431 |
| Prss44   | -0,16 | 0,836344315 | 0,54  | 0,370515616 | 0,37  | 0,503729732 | -0,04 | 0,95328957  | 0,27  | 0,654016085 |

|        |       |             |       |             |       |             |       |             |       |             |
|--------|-------|-------------|-------|-------------|-------|-------------|-------|-------------|-------|-------------|
| Prss45 | 0,45  | 0,268112899 | -0,33 | 0,435170839 | -0,05 | 0,964679275 | 0,37  | 0,387328067 | -0,06 | 0,933307994 |
| Prss46 | -0,16 | 0,782876517 | 0,08  | 0,918694468 | 0,26  | 0,787094995 | 0,39  | 0,412371936 | -0,03 | 0,979643119 |
| Prss47 | -0,01 | 0,997285684 | -0,25 | 0,6840278   | 0,28  | 0,728932654 | 0,38  | 0,639359737 | 0,28  | 0,752420653 |
| Prss48 | 0,11  | 0,867243066 | 0,1   | 0,9511343   | -0,28 | 0,639680076 | -0,1  | 0,922433376 | -0,03 | 0,980945466 |
| Prss50 | 0,14  | 0,892176461 | -0,17 | 0,853306685 | -0,07 | 0,95204022  | 0,43  | 0,194390604 | 0,33  | 0,510985117 |
| Prss51 | 0,27  | 0,611644482 | 0,14  | 0,861597191 | -0,26 | 0,667985034 | -0,12 | 0,869148815 | -0,32 | 0,566837145 |
| Prss52 | 0,36  | 0,440751221 | 0,04  | 0,958545812 | -0,26 | 0,70635953  | 0     | 0,997670938 | -0,24 | 0,778568403 |
| Prss53 | -0,29 | 0,735429196 | -0,07 | 0,941811651 | -0,08 | 0,941063967 | -0,14 | 0,813034756 | -0,8  | 0,130760379 |
| Prss54 | 0,07  | 0,942119638 | 0,02  | 0,97657246  | 0,22  | 0,820608584 | -0,15 | 0,854342596 | -0,42 | 0,655956123 |
| Prss55 | 0,33  | 0,666546952 | -0,52 | 0,585330659 | 0,73  | 0,232806399 | 0,34  | 0,572928314 | 0,01  | 0,992980215 |
| Prss56 | 0,39  | 0,53662401  | -0,4  | 0,57952147  | -0,01 | 0,990836784 | 0     | 0,998145955 | -0,12 | 0,879165851 |
| Prss57 | 0,12  | 0,879514284 | 0,2   | 0,853008252 | -0,01 | 0,996515082 | -0,06 | 0,920036779 | 0,1   | 0,91049199  |
| Prss58 | 0,13  | 0,829299665 | 0,4   | 0,738199172 | -0,11 | 0,882540073 | -0,13 | 0,75983637  | 0,02  | 0,984187689 |
| Prss8  | 0,2   | 0,721378796 | 0,29  | 0,695689103 | -0,15 | 0,810830651 | 0,23  | 0,550164397 | 0,62  | 0,281633932 |
| Prtg   | 0,06  | 0,938106189 | -0,02 | 0,992017084 | 0,28  | 0,70834039  | -0,39 | 0,518813701 | -0,33 | 0,699060093 |
| Prtn3  | -0,38 | 0,398157125 | 0,09  | 0,940161762 | -0,05 | 0,964509282 | 0,19  | 0,56514466  | -0,16 | 0,85945887  |
| Prune  | -0,21 | 0,794279814 | -0,26 | 0,87464113  | 0,43  | 0,580629383 | 0,37  | 0,729835365 | 0,03  | 0,983469081 |
| Prune2 | -0,1  | 0,928103232 | -0,02 | 0,994137877 | 0,44  | 0,713620433 | -0,64 | 0,569414286 | 0,02  | 0,990448047 |
| Prx    | 0,09  | 0,94918265  | -0,33 | 0,90781211  | 0,36  | 0,684455958 | -0,71 | 0,308890149 | 0,26  | 0,784792929 |
| Psap   | 0,01  | 0,991919022 | -0,09 | 0,859082205 | -0,16 | 0,748973263 | -0,32 | 0,303912839 | -0,26 | 0,61355523  |
| Psapl1 | 0,17  | 0,767083571 | 0,07  | 0,883145635 | -0,22 | 0,790112485 | -0,08 | 0,88335157  | -0,33 | 0,543746279 |
| Psat1  | -0,79 | 0,453318919 | -0,73 | 0,490650707 | 0,66  | 0,584320897 | 1,37  | 0,292644409 | 0,71  | 0,590982638 |
| Psca   | -0,18 | 0,739638841 | 0,33  | 0,508633526 | -0,38 | 0,628427952 | -0,17 | 0,720275463 | 0,19  | 0,817914157 |
| Psd    | 0,48  | 0,20299588  | -0,05 | 0,944539044 | -0,05 | 0,957555224 | 0,34  | 0,630104458 | -0,15 | 0,891925115 |
| Psd2   | 0,33  | 0,640077836 | 0,17  | 0,859954464 | -0,09 | 0,911921787 | 0,26  | 0,710838582 | 0,03  | 0,981439632 |
| Psd3   | 0,57  | 0,348159587 | -0,06 | 0,96172404  | 0,49  | 0,689975873 | 0,69  | 0,447819862 | -0,23 | 0,887815327 |
| Psd4   | 0,27  | 0,717407143 | -0,26 | 0,782652703 | -0,03 | 0,987977142 | 0,36  | 0,489177076 | 0,46  | 0,490412604 |
| Psen1  | -0,05 | 0,94815841  | 0,15  | 0,781706287 | -0,16 | 0,831266864 | -0,13 | 0,85301747  | 0,42  | 0,551972106 |
| Psen2  | -0,37 | 0,494787323 | 0,09  | 0,887880825 | 0,36  | 0,723037215 | -0,68 | 0,1178456   | 0,12  | 0,865258929 |
| Psenen | 0,22  | 0,541417213 | 0,19  | 0,634424292 | -0,19 | 0,716388221 | -0,23 | 0,507570518 | 0,16  | 0,801385411 |
| Psg16  | 0,16  | 0,867042427 | 0,32  | 0,806456132 | 0,19  | 0,839669459 | 0,1   | 0,900529161 | -0,02 | 0,983980708 |
| Psg17  | 0,03  | 0,969486005 | 0,5   | 0,271257402 | -0,16 | 0,894229514 | -0,07 | 0,900530968 | 0,08  | 0,939948423 |
| Psg19  | -0,03 | 0,967277212 | -0,05 | 0,973945454 | -0,06 | 0,944430551 | -0,27 | 0,765600373 | -0,05 | 0,956823512 |
| Psg21  | 0,31  | 0,465168175 | 0,52  | 0,310780186 | -0,57 | 0,575554281 | -0,2  | 0,71050512  | 0,02  | 0,985982505 |
| Psg22  | 0,29  | 0,764824121 | 0     | 1           | 0,29  | 0,918291931 | 1,24  | 0,358502795 | 1,06  | 0,117679228 |

|         |       |             |       |             |       |             |       |             |       |             |
|---------|-------|-------------|-------|-------------|-------|-------------|-------|-------------|-------|-------------|
| Psg23   | -0,22 | 0,746052863 | -0,15 | 0,88483892  | -0,21 | 0,711384991 | 0,26  | 0,846289776 | 0,41  | 0,722834592 |
| Psg25   | 0,07  | 0,92366013  | 0,52  | 0,494161701 | -0,04 | 0,950052494 | -0,23 | 0,699348716 | -0,03 | 0,977775233 |
| Psg26   | 0,23  | 0,603420985 | 0,39  | 0,668667058 | -0,11 | 0,85431991  | -0,49 | 0,137449917 | -0,03 | 0,976743304 |
| Psg27   | 0,3   | 0,593984785 | 0,11  | 0,855394007 | -0,07 | 0,916403684 | -0,08 | 0,894805454 | -0,09 | 0,917356423 |
| Psg28   | 0,2   | 0,815665003 | -0,12 | 0,839860347 | -0,12 | 0,940489823 | -0,14 | 0,763366023 | 0,25  | 0,768884521 |
| Psg29   | 0,2   | 0,827055517 | -0,02 | 0,982332924 | -0,2  | 0,746397133 | 0,01  | 0,993337409 | -0,21 | 0,859663155 |
| Psg-ps1 | 0,23  | 0,757032046 | 0,09  | 0,937377463 | -0,34 | 0,612977553 | -0,57 | 0,27714521  | -0,29 | 0,758052028 |
| Psip1   | 0,5   | 0,455714377 | 0,19  | 0,883093763 | -0,45 | 0,443039118 | 0,71  | 0,36184569  | 1,2   | 0,136651693 |
| Pskh1   | -0,13 | 0,842297453 | -0,16 | 0,807914454 | 0,09  | 0,928693448 | -0,22 | 0,612464969 | -0,72 | 0,178793405 |
| Psma1   | 0,05  | 0,932531737 | -0,27 | 0,606999442 | 0,43  | 0,560191012 | 0,62  | 0,076348362 | -0,06 | 0,94250983  |
| Psma2   | 0,11  | 0,84900712  | 0,06  | 0,910193022 | 0,05  | 0,950846671 | 0,52  | 0,14425577  | 0,39  | 0,447019099 |
| Psma3   | -0,09 | 0,839273617 | 0,11  | 0,852068212 | 0,2   | 0,798320169 | 0,41  | 0,236410357 | 0,75  | 0,088382056 |
| Psma4   | 0,06  | 0,916074217 | 0,07  | 0,910193022 | 0,53  | 0,448489436 | 0,81  | 0,053763228 | 0,32  | 0,529695885 |
| Psma6   | -0,03 | 0,950837484 | -0,14 | 0,790939978 | 0,54  | 0,264621497 | 0,61  | 0,195221568 | -0,03 | 0,978981442 |
| Psma7   | 0,03  | 0,965729148 | 0,2   | 0,700928109 | 0,18  | 0,786016454 | 0,46  | 0,297209799 | 0,79  | 0,137167994 |
| Psma8   | 0,18  | 0,881501871 | -0,42 | 0,732847182 | 0,61  | 0,37721644  | 0,67  | 0,181290083 | 0,02  | 0,990091016 |
| Psmb1   | 0,02  | 0,972682121 | 0,15  | 0,764886087 | 0,43  | 0,472884091 | 0,38  | 0,257710111 | 0,02  | 0,980945466 |
| Psmb10  | 0,43  | 0,610662221 | 0,78  | 0,140094575 | -0,99 | 0,125283285 | -0,22 | 0,599095885 | 1,17  | 0,023869051 |
| Psmb11  | 0,06  | 0,89763852  | 0,01  | 0,992949484 | 0     | 0,996946245 | 0,08  | 0,839333217 | 0,07  | 0,933384566 |
| Psmb2   | 0,07  | 0,893625965 | -0,17 | 0,66616142  | 0,47  | 0,411884367 | 0,39  | 0,224460633 | 0,25  | 0,61650525  |
| Psmb3   | -0,28 | 0,463855904 | -0,28 | 0,534340854 | -0,26 | 0,683331533 | 0,33  | 0,394490824 | 0,14  | 0,840952901 |
| Psmb4   | -0,05 | 0,920821426 | 0,02  | 0,9860901   | 0,19  | 0,73893881  | 0,28  | 0,443613103 | 0,26  | 0,602231893 |
| Psmb5   | -0,27 | 0,458591721 | -0,16 | 0,747960694 | 0,4   | 0,474517891 | 0,71  | 0,178931682 | 0,01  | 0,992406971 |
| Psmb6   | -0,14 | 0,769716601 | -0,36 | 0,609522549 | 0,18  | 0,786634846 | 0,38  | 0,282769221 | -0,07 | 0,932268703 |
| Psmb7   | -0,42 | 0,328932223 | -0,26 | 0,643182627 | 0,2   | 0,730738549 | 0,7   | 0,239185309 | 0,24  | 0,735152891 |
| Psmb8   | 1,02  | 0,169976209 | 0,96  | 0,10752682  | -1,52 | 0,005330046 | 0,03  | 0,961963439 | 1,55  | 0,01012797  |
| Psmb9   | 0,65  | 0,53855651  | 0,41  | 0,278438834 | -1,72 | 0,006598178 | 0,23  | 0,582057967 | 1,12  | 0,025410853 |
| Psmc1   | -0,64 | 0,109113269 | -0,37 | 0,316777126 | 0,27  | 0,638358093 | 0,35  | 0,415968391 | -0,41 | 0,47921528  |
| Psmc2   | -0,1  | 0,926007268 | -0,09 | 0,93418094  | -0,29 | 0,745313546 | 0,08  | 0,887824091 | -0,24 | 0,726984366 |
| Psmc3   | -0,17 | 0,663119768 | -0,17 | 0,6547161   | 0,06  | 0,927301763 | 0,33  | 0,293872515 | 0,02  | 0,983682211 |
| Psmc3ip | -0,72 | 0,134121951 | -1,04 | 0,205273528 | 1,21  | 0,070134204 | 0,62  | 0,331323877 | -0,05 | 0,973428839 |
| Psmc4   | -0,25 | 0,485845247 | -0,3  | 0,525463389 | 0,51  | 0,402409115 | 1,12  | 0,051245222 | -0,12 | 0,892505022 |
| Psmc5   | -0,31 | 0,416726762 | -0,35 | 0,41954018  | 0,42  | 0,506787649 | 0,61  | 0,28351096  | 0,16  | 0,845218636 |
| Psmc6   | -0,01 | 0,991027737 | -0,34 | 0,536246395 | 0,27  | 0,775505638 | 0,61  | 0,161985142 | 0,34  | 0,524829864 |
| Psmd1   | 0,01  | 0,984759626 | -0,17 | 0,763005394 | 0,2   | 0,834979811 | 0,45  | 0,279524673 | -0,26 | 0,668341621 |

|          |       |             |       |             |       |             |       |             |       |             |
|----------|-------|-------------|-------|-------------|-------|-------------|-------|-------------|-------|-------------|
| Psmid10  | -0,02 | 0,980700612 | -0,13 | 0,805949528 | 0,25  | 0,87140695  | 0,64  | 0,112775512 | 0,04  | 0,965244101 |
| Psmid11  | -0,13 | 0,754029145 | 0,05  | 0,938478209 | 0,03  | 0,977126842 | 0,64  | 0,308923754 | 0,36  | 0,655956123 |
| Psmid12  | -0,19 | 0,626534172 | -0,22 | 0,608466494 | 0,54  | 0,38575085  | 0,8   | 0,091636661 | 0,24  | 0,73862837  |
| Psmid13  | -0,58 | 0,236944071 | -0,21 | 0,798741467 | 0,96  | 0,359711139 | 1,14  | 0,393759175 | -0,26 | 0,91314596  |
| Psmid14  | -0,1  | 0,889867231 | -0,11 | 0,857388191 | 0,47  | 0,523680014 | 1,27  | 0,025699992 | 0,24  | 0,722164753 |
| Psmid2   | -0,22 | 0,586425873 | -0,24 | 0,642541818 | 0,38  | 0,474378892 | 0,74  | 0,049796758 | -0,35 | 0,493807926 |
| Psmid3   | -0,38 | 0,354604769 | -0,24 | 0,666450149 | 0,35  | 0,529748858 | 0,81  | 0,096085093 | -0,01 | 0,992406971 |
| Psmid4   | -0,19 | 0,655130976 | -0,01 | 0,996193845 | 0,33  | 0,45563979  | 0,75  | 0,205383915 | 0,07  | 0,951429597 |
| Psmid5   | -0,17 | 0,839375532 | -0,09 | 0,934294134 | 0,01  | 0,996286252 | -0,33 | 0,577709198 | -0,34 | 0,555509871 |
| Psmid6   | -0,01 | 0,99456044  | -0,17 | 0,747707816 | 0,33  | 0,647159713 | 0,9   | 0,027661392 | 0,1   | 0,885872093 |
| Psmid7   | 0,28  | 0,581573098 | 0,02  | 0,994137877 | -0,04 | 0,977827235 | 0,12  | 0,820740116 | 0,29  | 0,546863793 |
| Psmid8   | 0,02  | 0,978394906 | -0,14 | 0,769092754 | 0,42  | 0,374422909 | 0,72  | 0,057381138 | 0,09  | 0,894327929 |
| Psmid9   | -0,2  | 0,78476082  | -0,29 | 0,654719935 | 0,2   | 0,854159404 | 0,29  | 0,405933953 | -0,09 | 0,927807084 |
| Psme1    | 0,62  | 0,307798337 | 0,84  | 0,17827498  | -1,07 | 0,031028543 | 0,12  | 0,835214439 | 1,34  | 0,017064876 |
| Psme2    | -0,27 | 0,565048785 | -0,15 | 0,735852142 | 0,09  | 0,909963525 | -0,15 | 0,797527363 | 0,11  | 0,89761151  |
| Psme2b   | 2     | 0,048369319 | 1,82  | 0,140763001 | -1,54 | 0,461600894 | -0,39 | 0,502288046 | 1,36  | 0,083660756 |
| Psme3    | -0,4  | 0,469049834 | -0,27 | 0,602956592 | 0,38  | 0,712697139 | 1,09  | 0,332781724 | 0,32  | 0,835191    |
| Psme4    | -0,2  | 0,721432139 | -0,01 | 0,992383215 | 0,18  | 0,777745152 | 0,83  | 0,045541547 | 0,3   | 0,589603946 |
| Psmf1    | 0,08  | 0,916075456 | -0,14 | 0,763005394 | -0,16 | 0,859669963 | -0,11 | 0,924522939 | -0,02 | 0,991628025 |
| Psmg1    | 0     | 0,996998625 | -0,33 | 0,729172466 | 0,33  | 0,809137779 | 1,21  | 0,074295984 | -0,11 | 0,8832829   |
| Psmg2    | -0,84 | 0,131976285 | -0,58 | 0,544993274 | -0,05 | 0,982305856 | 0,29  | 0,829591443 | 0,18  | 0,904730291 |
| Psmg3    | -0,22 | 0,674821764 | -0,03 | 0,951768918 | -0,04 | 0,957564506 | 0,12  | 0,857672322 | 0,11  | 0,924811486 |
| Psmg4    | 0,47  | 0,519135114 | 0,29  | 0,542153202 | -0,71 | 0,364663958 | 0,81  | 0,212666842 | 1,54  | 0,029071378 |
| Psors1c2 | 0,21  | 0,7494877   | -0,04 | 0,935984823 | -0,19 | 0,843091338 | 1,3   | 0,036871879 | 0,56  | 0,198832044 |
| Pspc1    | -0,55 | 0,397618341 | 0,01  | 0,999210601 | 0,41  | 0,432229079 | -0,04 | 0,954851353 | 0,22  | 0,78931193  |
| Psph     | 0,12  | 0,822107047 | 0,13  | 0,890813406 | 0,35  | 0,750826735 | 0,45  | 0,696607541 | -0,13 | 0,930302738 |
| Pspn     | -0,27 | 0,497439119 | -0,13 | 0,801887881 | -0,36 | 0,568619313 | 0,11  | 0,87630843  | -0,02 | 0,982175252 |
| Psrc1    | -0,42 | 0,298876012 | -0,1  | 0,875688773 | 0,56  | 0,310107338 | 0,78  | 0,074231799 | 0,3   | 0,622761567 |
| Pstk     | -0,28 | 0,720712211 | -0,21 | 0,763005394 | 0,98  | 0,294972378 | 0,22  | 0,716994919 | -0,42 | 0,566256651 |
| Pstpip1  | 0,79  | 0,279386788 | -0,08 | 0,882847123 | -0,11 | 0,941718633 | 0,07  | 0,8914104   | 0,03  | 0,985982505 |
| Pstpip2  | -0,4  | 0,532948347 | -0,11 | 0,886286684 | 0,28  | 0,85011545  | 0,43  | 0,700126136 | -0,52 | 0,628127128 |
| Ptafr    | -0,28 | 0,620554858 | -0,03 | 0,984710854 | 0,77  | 0,469558664 | 0,16  | 0,7412492   | 0,39  | 0,62559702  |
| Ptar1    | 0,47  | 0,215332386 | 0,25  | 0,64119235  | 0,67  | 0,70834039  | -0,44 | 0,437001295 | -0,07 | 0,954657649 |
| Ptbp1    | -0,19 | 0,614250688 | -0,17 | 0,670859269 | 0,33  | 0,501664412 | 0,6   | 0,086890299 | 0,21  | 0,697818445 |
| Ptbp2    | -0,15 | 0,889013209 | 0,49  | 0,29443543  | -0,16 | 0,904057901 | -0,39 | 0,616659068 | 0,69  | 0,415425377 |

|         |       |             |       |             |       |             |       |             |       |             |
|---------|-------|-------------|-------|-------------|-------|-------------|-------|-------------|-------|-------------|
| Ptbp3   | 0,07  | 0,877096932 | 0,03  | 0,967833514 | 0,16  | 0,738804472 | 0,41  | 0,247679503 | 0,21  | 0,715879151 |
| Ptcd1   | -0,18 | 0,723617184 | 0,24  | 0,612645853 | 0,01  | 0,992201196 | 0,05  | 0,939026864 | -0,01 | 0,991980521 |
| Ptcd2   | -0,64 | 0,520667704 | 0,22  | 0,90164068  | 0,25  | 0,774412908 | 0,58  | 0,469292442 | 0,6   | 0,484092152 |
| Ptcd3   | -0,73 | 0,287459734 | -0,4  | 0,762295026 | 0,64  | 0,409611548 | 1,12  | 0,2423686   | 0,63  | 0,535065209 |
| Ptch1   | 0,02  | 0,98456417  | 0,03  | 0,979002922 | 0,25  | 0,800107725 | 0,2   | 0,818242274 | -0,17 | 0,887154982 |
| Ptch2   | 0,1   | 0,911800803 | -0,59 | 0,406817158 | -0,19 | 0,772397144 | -0,47 | 0,46420449  | -0,55 | 0,40189401  |
| Ptchd1  | -0,12 | 0,834672627 | 0,3   | 0,513586383 | -0,03 | 0,973802765 | -0,29 | 0,325343861 | 0,4   | 0,496445233 |
| Ptchd2  | 0,25  | 0,614529839 | -0,33 | 0,468035796 | 0,11  | 0,839921239 | 0,2   | 0,606787549 | 0,05  | 0,953971867 |
| Ptchd3  | 0,07  | 0,963378584 | 0,29  | 0,501701704 | -0,17 | 0,834488055 | -0,03 | 0,967866794 | 0,2   | 0,883592868 |
| Ptchd4  | -0,36 | 0,732196499 | 0,05  | 0,980518468 | -0,5  | 0,527929204 | 0,4   | 0,335213853 | 0,04  | 0,978981442 |
| Ptcra   | -0,05 | 0,94913976  | 0,05  | 0,955872959 | -0,31 | 0,507095234 | 0,09  | 0,878911014 | 0,05  | 0,958792535 |
| Ptdss1  | -0,26 | 0,727413551 | -0,04 | 0,947063701 | 0,27  | 0,65239626  | -0,37 | 0,407916841 | -0,12 | 0,906338603 |
| Ptdss2  | 0,11  | 0,946368282 | -0,24 | 0,85154774  | 0,54  | 0,453294355 | 0,75  | 0,415968391 | 0,14  | 0,915356549 |
| Pten    | 0,03  | 0,955736834 | 0,05  | 0,938233008 | 0,1   | 0,917694073 | 0,27  | 0,449079331 | -0,15 | 0,821140509 |
| Pter    | 0,18  | 0,728516314 | 0,02  | 0,978904487 | -0,93 | 0,10424513  | 1,46  | 0,032617608 | -0,78 | 0,585244465 |
| Ptf1a   | 0     | 0,998927419 | 0,2   | 0,75247655  | -0,12 | 0,872627378 | -0,27 | 0,469199805 | -0,21 | 0,745574572 |
| Ptf1aos | 0,23  | 0,60879435  | 0,01  | 0,995205602 | -0,29 | 0,636643861 | 0,03  | 0,959203776 | -0,03 | 0,976345724 |
| Ptgdr   | 0,34  | 0,436489637 | -0,06 | 0,96630649  | 0,36  | 0,489556221 | 0,08  | 0,916487553 | -0,12 | 0,922921816 |
| Ptgdr2  | 0,83  | 0,194613044 | 0,18  | 0,778496491 | 0,2   | 0,904918185 | -0,14 | 0,865206138 | 0,02  | 0,984125319 |
| Ptgds   | 0,06  | 0,94881239  | -0,6  | 0,232378975 | 0,14  | 0,887085755 | -0,38 | 0,490967375 | -0,34 | 0,734263498 |
| Ptger1  | -0,19 | 0,686076441 | 0,32  | 0,520153038 | 0,13  | 0,932577939 | -0,73 | 0,439829003 | -0,92 | 0,330314966 |
| Ptger2  | 0,15  | 0,849358317 | 0,27  | 0,627205829 | -0,33 | 0,509702247 | 0,09  | 0,871435673 | 0,25  | 0,736229974 |
| Ptger3  | 0,23  | 0,722262013 | -0,28 | 0,509013394 | -0,09 | 0,887429895 | 0     | 1           | 0,24  | 0,856141339 |
| Ptger4  | 0,23  | 0,740529913 | 0,08  | 0,909975293 | 0,44  | 0,715497532 | -1,97 | 0,015021677 | -0,08 | 0,952141995 |
| Ptges   | -0,16 | 0,853698254 | -0,2  | 0,73623784  | 0,36  | 0,56948206  | 0,6   | 0,229859806 | 0,46  | 0,628433608 |
| Ptges2  | -0,46 | 0,341853862 | 0,22  | 0,766425161 | 0,05  | 0,95204022  | -0,03 | 0,971338071 | 0,34  | 0,635612479 |
| Ptges3  | 0,03  | 0,949541186 | -0,13 | 0,751382934 | 0,32  | 0,543821684 | 0,31  | 0,373645618 | 0,41  | 0,412516096 |
| Ptges3l | -0,58 | 0,606922012 | 0,08  | 0,880473303 | 1,15  | 0,200055611 | 1,25  | 0,055569548 | -0,08 | 0,952296554 |
| Ptgfr   | 1,22  | 0,067204873 | 0,39  | 0,80192513  | -0,55 | 0,404120029 | -0,07 | 0,940292598 | -0,12 | 0,911736306 |
| Ptgfrn  | -0,8  | 0,461303473 | -0,92 | 0,241189065 | 0,88  | 0,041860694 | 2,43  | 0,094011812 | -0,43 | 0,808077941 |
| Ptgir   | 0,03  | 0,975506993 | -0,29 | 0,539700767 | 0,21  | 0,730738549 | -0,08 | 0,898469878 | 0,11  | 0,875682429 |
| Ptgis   | 0,35  | 0,648730873 | 0,11  | 0,907323894 | -0,65 | 0,471873683 | -1,61 | 0,040875837 | -0,2  | 0,872417427 |
| Ptgr1   | -0,87 | 0,194613044 | -0,51 | 0,359483031 | 0,64  | 0,307848353 | 0,72  | 0,62163258  | -1,02 | 0,559845734 |
| Ptgr2   | -0,17 | 0,875555348 | 0,69  | 0,583200444 | -0,09 | 0,963725374 | -0,97 | 0,202877508 | 0,06  | 0,951646452 |
| Ptgs1   | -0,6  | 0,381895665 | -0,64 | 0,637452806 | 0,62  | 0,52684518  | -3,02 | 0,015037702 | -1,56 | 0,01736358  |



|          |       |             |       |             |       |             |       |             |       |             |
|----------|-------|-------------|-------|-------------|-------|-------------|-------|-------------|-------|-------------|
| Ptgs2    | 0,14  | 0,932110766 | 0,24  | 0,941751202 | 0,31  | 0,800107725 | -3,2  | 0,006048812 | 0,99  | 0,205947991 |
| Ptgs2os  | -0,13 | 0,814888638 | 0,31  | 0,488525923 | -0,06 | 0,941627748 | 0,02  | 0,970874875 | -0,03 | 0,976345724 |
| Ptgs2os2 | 0,19  | 0,683299822 | -0,13 | 0,882847123 | -0,17 | 0,778707372 | 0,35  | 0,49863787  | 0,02  | 0,979456872 |
| Pth      | 0,04  | 0,946792769 | 0,03  | 0,968490473 | -0,08 | 0,909725605 | 0,11  | 0,838100325 | -0,14 | 0,84550602  |
| Pth1r    | 0,22  | 0,61300824  | 0,12  | 0,908190136 | -0,17 | 0,7775124   | -0,96 | 0,037972964 | -0,46 | 0,32673984  |
| Pth2     | -0,03 | 0,972112267 | 0,29  | 0,673294705 | 0,3   | 0,640613239 | -0,12 | 0,843100928 | 0,07  | 0,949140184 |
| Pth2r    | -0,08 | 0,928461506 | 0,06  | 0,952827166 | 0,01  | 0,993454287 | -0,02 | 0,979516321 | -0,32 | 0,559658892 |
| Pthlh    | 0,33  | 0,494884125 | -0,45 | 0,695689103 | -0,5  | 0,728022961 | -2,31 | 0,017791354 | -0,19 | 0,82823489  |
| Ptk2     | -0,51 | 0,231367297 | -0,33 | 0,424068004 | 0,06  | 0,931899359 | -0,1  | 0,797809244 | 0,02  | 0,980961333 |
| Ptk2b    | 0,18  | 0,858182276 | 0,44  | 0,49125334  | 0,57  | 0,683975246 | 0,06  | 0,963752888 | -0,42 | 0,746512314 |
| Ptk6     | 0,74  | 0,381983386 | 1,13  | 0,404360976 | 0,17  | 0,849423457 | -1,58 | 0,188497007 | 0,12  | 0,942469511 |
| Ptk7     | -0,85 | 0,209270108 | -0,99 | 0,097087927 | 0,71  | 0,280958182 | 2,39  | 0,01851295  | -0,66 | 0,428751049 |
| Ptma     | -0,89 | 0,102058516 | -0,24 | 0,765370871 | -0,04 | 0,963199274 | 0,32  | 0,543079385 | 0,22  | 0,726042963 |
| Ptms     | -0,39 | 0,29226481  | -0,14 | 0,805467498 | -0,01 | 0,993379272 | -0,05 | 0,900514853 | -0,51 | 0,32673984  |
| Ptn      | -0,5  | 0,651732317 | 0,45  | 0,424068004 | 1,25  | 0,253451264 | -1,71 | 0,116267286 | -0,48 | 0,74624632  |
| Ptov1    | -0,17 | 0,742823915 | -0,04 | 0,945374636 | 0,88  | 0,156156107 | 0,38  | 0,311276982 | -0,21 | 0,818825401 |
| Ptp4a1   | 0,35  | 0,508688727 | 0,09  | 0,916176914 | 0,24  | 0,908448118 | 0,66  | 0,167766415 | 0,51  | 0,46173543  |
| Ptp4a2   | 0,3   | 0,412575527 | 0,07  | 0,889334606 | 0,17  | 0,813287877 | 0,45  | 0,175981428 | 0,05  | 0,950267521 |
| Ptp4a3   | -0,59 | 0,263252718 | -0,27 | 0,597483102 | 0,25  | 0,824343294 | 1,28  | 0,074454367 | -0,25 | 0,733488478 |
| Ptpdc1   | -0,02 | 0,990404752 | -0,1  | 0,855474571 | 0,37  | 0,571405665 | 0,17  | 0,749488424 | -0,21 | 0,710368081 |
| Ptpmt1   | 0,13  | 0,859827602 | -0,63 | 0,157192993 | 0,58  | 0,529748858 | 0,86  | 0,073709443 | 0,02  | 0,983494749 |
| Ptpn1    | 0,13  | 0,801665973 | 0,34  | 0,792112243 | -0,11 | 0,928796719 | 0,26  | 0,748470342 | 0,22  | 0,814864454 |
| Ptpn11   | -0,44 | 0,343763562 | -0,02 | 0,9860901   | 0,45  | 0,445616611 | 0,01  | 0,989314626 | -0,5  | 0,697818445 |
| Ptpn12   | 0,06  | 0,906122169 | 0,31  | 0,774758897 | 0,1   | 0,887630371 | 0,11  | 0,90213506  | 0,33  | 0,484862172 |
| Ptpn13   | 0,17  | 0,806353432 | 0,63  | 0,370515616 | 0,14  | 0,902637441 | -0,62 | 0,310873282 | -0,24 | 0,82517732  |
| Ptpn14   | -0,06 | 0,894895846 | 0,22  | 0,801269703 | -0,46 | 0,437542796 | -0,6  | 0,377681746 | 0,1   | 0,919325625 |
| Ptpn18   | -0,04 | 0,96177183  | -0,44 | 0,689193472 | -0,36 | 0,707539555 | 0,35  | 0,588987424 | -0,08 | 0,939248399 |
| Ptpn2    | 0,45  | 0,656034838 | 0,52  | 0,489673761 | 0,26  | 0,802795561 | 0,25  | 0,731911621 | 1,63  | 0,032750472 |
| Ptpn20   | -0,21 | 0,764189777 | 0,47  | 0,443318093 | -0,33 | 0,61190379  | 0,02  | 0,981203009 | -0,09 | 0,912250982 |
| Ptpn21   | -0,2  | 0,860485544 | 0,17  | 0,828219939 | 0,61  | 0,215769924 | -1,12 | 0,092642526 | -0,12 | 0,918529364 |
| Ptpn22   | 0,24  | 0,830575431 | 0,15  | 0,92304323  | -1,11 | 0,556454102 | -0,06 | 0,952797297 | 0,94  | 0,389664866 |
| Ptpn23   | -0,04 | 0,956452501 | -0,3  | 0,655678435 | 0,5   | 0,57717258  | 0,37  | 0,619678786 | 0     | 0,998332822 |
| Ptpn3    | 0,07  | 0,931445059 | 0     | 1           | 0,13  | 0,893010661 | -1,55 | 0,054411231 | -0,03 | 0,980945466 |
| Ptpn4    | -0,05 | 0,977315534 | 0,26  | 0,741462581 | 0,54  | 0,68845998  | 1,73  | 0,015894405 | 0,07  | 0,975441362 |
| Ptpn5    | 0,08  | 0,867243066 | -0,1  | 0,865233162 | 0,26  | 0,660561609 | -0,12 | 0,8556361   | -0,19 | 0,815685084 |

|         |       |             |       |             |       |             |       |             |       |             |
|---------|-------|-------------|-------|-------------|-------|-------------|-------|-------------|-------|-------------|
| Ptpn6   | 0,17  | 0,777409186 | -0,13 | 0,876503933 | 0,8   | 0,199071989 | 0,27  | 0,561554743 | 0,22  | 0,766559546 |
| Ptpn7   | -0,99 | 0,179001759 | -0,88 | 0,269079541 | -0,38 | 0,620767415 | 0,45  | 0,307395427 | -0,21 | 0,823098095 |
| Ptpn9   | -0,44 | 0,318041432 | 0,18  | 0,781665479 | -0,36 | 0,436827113 | 0,78  | 0,058597347 | -0,41 | 0,647876293 |
| Ptpra   | -0,2  | 0,648730873 | 0     | 1           | -0,12 | 0,862441091 | -0,14 | 0,811187324 | -0,01 | 0,991315044 |
| Ptprb   | -0,32 | 0,416524319 | -0,36 | 0,459417799 | -0,23 | 0,684745645 | -1,21 | 0,014570591 | -0,79 | 0,067602527 |
| Ptprc   | -0,12 | 0,920572876 | -0,82 | 0,276578805 | -0,78 | 0,544583457 | 0,26  | 0,758934576 | -0,2  | 0,918865935 |
| Ptprcap | 0,35  | 0,683531628 | 0,21  | 0,708607468 | -0,19 | 0,85011545  | 0,4   | 0,604127556 | 0,39  | 0,753779416 |
| Ptprd   | 0,14  | 0,783591449 | -0,25 | 0,686540452 | 0,12  | 0,897316731 | -0,53 | 0,520660404 | -0,26 | 0,844079844 |
| Ptpre   | 0,16  | 0,786316419 | -0,12 | 0,84314495  | -0,08 | 0,957193291 | 2,14  | 0,010913137 | 0,43  | 0,608072805 |
| Ptprf   | -0,1  | 0,936700983 | 0,41  | 0,747707816 | 1     | 0,200488648 | -0,92 | 0,484435543 | 0,06  | 0,976743304 |
| Ptprg   | -0,83 | 0,26418498  | -0,26 | 0,564379625 | -0,1  | 0,922807267 | -1,54 | 0,018465224 | -0,32 | 0,602622607 |
| Ptprh   | -0,17 | 0,78476082  | -0,24 | 0,747360238 | -0,11 | 0,904239687 | -0,06 | 0,899914853 | -0,31 | 0,671838073 |
| Ptprij  | -0,31 | 0,728739942 | 0,18  | 0,89081665  | 1,18  | 0,280780716 | -3,85 | 0,005494206 | -1,21 | 0,021245895 |
| Ptprk   | -0,06 | 0,91960004  | 0,15  | 0,781665479 | -0,13 | 0,789802954 | 1,77  | 0,011154484 | 1,02  | 0,052198247 |
| Ptpm    | -0,21 | 0,597519827 | -0,13 | 0,797845019 | 0,15  | 0,849423457 | -0,1  | 0,840932155 | -0,49 | 0,305692008 |
| Ptpn    | -0,2  | 0,837491089 | 0,55  | 0,621263958 | 0,84  | 0,099237376 | 3,2   | 0,012155303 | 0,18  | 0,864166878 |
| Ptpn2   | -0,27 | 0,634129153 | -0,09 | 0,947986685 | -0,16 | 0,882540073 | -0,02 | 0,9704566   | 0,19  | 0,82517732  |
| Ptpro   | -0,05 | 0,958512892 | -0,39 | 0,6840278   | -0,34 | 0,500343254 | 0,26  | 0,885417869 | -0,44 | 0,796586414 |
| Ptprq   | 0,1   | 0,895682399 | 0,06  | 0,964757836 | -0,48 | 0,26430961  | -0,31 | 0,675727528 | 0,05  | 0,958068117 |
| Ptprr   | -0,1  | 0,898672447 | 0,32  | 0,526101975 | 0     | 0,997268369 | -1,41 | 0,181290083 | -0,22 | 0,911736306 |
| Ptprs   | -0,13 | 0,825389612 | -0,32 | 0,777969396 | 0,78  | 0,337816317 | -1,14 | 0,02067712  | -0,84 | 0,073632165 |
| Ptprt   | 0,32  | 0,61660035  | 0,08  | 0,916338327 | -0,31 | 0,807786405 | 0,27  | 0,753660202 | 0,17  | 0,890957032 |
| Ptprtos | -0,1  | 0,8465448   | -0,19 | 0,666450149 | -0,07 | 0,906275304 | 0,28  | 0,398422441 | -0,12 | 0,870556279 |
| Ptpru   | -0,11 | 0,911399028 | -0,26 | 0,722000016 | -0,04 | 0,975866042 | -3,85 | 0,003863434 | -0,81 | 0,164923725 |
| Ptprv   | -0,03 | 0,978458035 | -0,06 | 0,963369162 | -0,2  | 0,819191097 | 0,16  | 0,73719503  | 0,07  | 0,940092696 |
| Ptprz1  | 0,04  | 0,948538969 | -0,03 | 0,975959817 | 0,1   | 0,881793393 | -0,75 | 0,414522125 | -0,12 | 0,937045732 |
| Ptrf    | 0,02  | 0,965482773 | 0,07  | 0,955345839 | -0,29 | 0,742928763 | 0,51  | 0,530913165 | -0,3  | 0,779912857 |
| Ptrh1   | 0,15  | 0,85110723  | 0,15  | 0,804025406 | 0,16  | 0,85952125  | 1,02  | 0,032355351 | 0,3   | 0,734230208 |
| Ptrh2   | -0,54 | 0,568787523 | -0,1  | 0,842663656 | 0,22  | 0,856107139 | -0,27 | 0,865534768 | -0,73 | 0,632478417 |
| Ptrhd1  | 0,15  | 0,850952988 | 0,31  | 0,447765098 | -0,31 | 0,789902399 | 0,01  | 0,994512187 | 0,16  | 0,855741842 |
| Pts     | -0,05 | 0,949362206 | -0,03 | 0,980385701 | -0,34 | 0,750624323 | -0,08 | 0,93129706  | -0,03 | 0,979456872 |
| Pttg1   | 0,16  | 0,752862409 | 0,16  | 0,808498635 | -0,23 | 0,709885771 | -1,02 | 0,046876083 | 0,38  | 0,462232367 |
| Pttg1ip | 0,71  | 0,087206713 | 0,57  | 0,217893395 | -0,38 | 0,461388668 | -0,93 | 0,054596372 | 0,16  | 0,820755717 |
| Ptx3    | -0,29 | 0,663447662 | 0,08  | 0,905535217 | 0,19  | 0,905177737 | -0,37 | 0,505670384 | -0,4  | 0,586118577 |
| Ptx4    | 0,46  | 0,368250771 | 0,1   | 0,94678208  | -0,21 | 0,744387748 | -0,08 | 0,93510539  | -0,07 | 0,931519966 |

|        |       |             |       |             |       |             |       |             |       |             |
|--------|-------|-------------|-------|-------------|-------|-------------|-------|-------------|-------|-------------|
| Puf60  | -0,16 | 0,753900874 | -0,21 | 0,606866408 | 0,15  | 0,814575035 | 0,16  | 0,660090125 | 0,08  | 0,912000029 |
| Pum1   | -0,06 | 0,907748757 | -0,07 | 0,897038013 | 0,11  | 0,859411859 | 0,26  | 0,420894607 | 0,28  | 0,626176831 |
| Pum2   | -0,01 | 0,991919022 | 0,28  | 0,518533895 | -0,07 | 0,928301121 | 0,13  | 0,712869858 | 0,23  | 0,710319186 |
| Pum3   | -0,15 | 0,790497738 | 0,04  | 0,946885634 | 0,19  | 0,840308671 | 0,81  | 0,310394717 | 0,67  | 0,421255613 |
| Purb   | -0,3  | 0,515830448 | -0,11 | 0,791175827 | 0,63  | 0,17564176  | -0,11 | 0,793134304 | -0,04 | 0,968038677 |
| Purg   | -0,29 | 0,656095444 | 0,03  | 0,985764487 | -0,24 | 0,742605945 | -0,02 | 0,988205241 | 0,17  | 0,902540251 |
| Pus1   | -0,22 | 0,780773609 | -0,58 | 0,480808447 | 0,31  | 0,596577382 | 0,73  | 0,332228259 | -0,34 | 0,649849091 |
| Pus10  | -0,94 | 0,206682903 | -0,27 | 0,712500402 | 0,67  | 0,169619185 | 0,86  | 0,051590483 | 0,27  | 0,703670469 |
| Pus3   | -0,1  | 0,925584588 | -0,14 | 0,850048209 | 0,12  | 0,943170329 | -0,04 | 0,958505987 | 0,38  | 0,6441349   |
| Pus7   | -0,24 | 0,718996404 | -0,57 | 0,539700767 | 0,4   | 0,552331473 | 0,47  | 0,389981292 | -1,18 | 0,255210827 |
| Pus7l  | -0,68 | 0,385512506 | -0,39 | 0,674468926 | -0,38 | 0,552212491 | 0,45  | 0,774226984 | 0,48  | 0,784375319 |
| Pusl1  | -0,44 | 0,403765204 | -0,25 | 0,654719935 | 0,97  | 0,264885341 | 0,37  | 0,603611964 | 0,41  | 0,48288529  |
| Pvalb  | 0,03  | 0,981777139 | 0,29  | 0,732847182 | -0,18 | 0,794194778 | -0,2  | 0,807258222 | 0,3   | 0,563213699 |
| Pvr    | 0,01  | 0,987045751 | 0,57  | 0,270695215 | 0,36  | 0,634936323 | 0,31  | 0,577432583 | 0,31  | 0,746491819 |
| Pvrl1  | -0,21 | 0,747663533 | -0,38 | 0,726559339 | 0,24  | 0,882540073 | -0,86 | 0,093603361 | -0,01 | 0,992370267 |
| Pvrl2  | -0,18 | 0,674821764 | 0,13  | 0,824916914 | 0,33  | 0,532868478 | 0,39  | 0,357261043 | -0,03 | 0,976743304 |
| Pvrl3  | -0,39 | 0,431394932 | -0,42 | 0,514781187 | 0,66  | 0,161297116 | 0,06  | 0,96875256  | 0,39  | 0,753273319 |
| Pvrl4  | -0,01 | 0,995482647 | -0,51 | 0,4540373   | -0,04 | 0,973186233 | -0,07 | 0,896599656 | -0,3  | 0,586118577 |
| Pvt1   | -0,36 | 0,640002115 | -0,19 | 0,815317911 | -0,08 | 0,953312137 | 1,09  | 0,069998075 | 0,66  | 0,257471362 |
| Pwp1   | -0,95 | 0,153132474 | -0,64 | 0,377669413 | 0,16  | 0,81738717  | 1,15  | 0,065831648 | -0,6  | 0,355561977 |
| Pwp2   | -0,19 | 0,840909921 | 0,14  | 0,880892852 | 0,18  | 0,877023506 | -0,02 | 0,978782666 | 0,11  | 0,890833196 |
| Pwwp2a | -0,22 | 0,77234948  | 0,12  | 0,84786877  | -0,01 | 0,995591198 | -0,05 | 0,944051993 | 0,4   | 0,541415712 |
| Pwwp2b | -0,26 | 0,559760851 | 0,16  | 0,761719414 | -0,25 | 0,662451176 | 0,02  | 0,970534463 | 0,45  | 0,429206436 |
| Pxdc1  | -0,21 | 0,724803365 | -0,39 | 0,413275018 | 0,9   | 0,15369828  | 1,01  | 0,044461135 | -0,09 | 0,916489445 |
| Pxdn   | -0,5  | 0,203459935 | -0,36 | 0,524408973 | 0,71  | 0,154586266 | 2,22  | 0,005660788 | -1,47 | 0,01012797  |
| Pxk    | 0,23  | 0,631688937 | 0,07  | 0,907169389 | -0,47 | 0,424320252 | -0,32 | 0,277659586 | 0,57  | 0,174362184 |
| Pxmp2  | 0,6   | 0,290474279 | 0,05  | 0,925520621 | 0,14  | 0,815942732 | -0,7  | 0,437515574 | -0,35 | 0,825311688 |
| Pxmp4  | 0,3   | 0,364628239 | 0,6   | 0,593351321 | -0,4  | 0,653604016 | -0,65 | 0,357531433 | 0,66  | 0,370187845 |
| Pxn    | -0,26 | 0,587427288 | -0,19 | 0,67317894  | -0,01 | 0,993379272 | 0,18  | 0,691991607 | -0,41 | 0,419648538 |
| Pxt1   | -0,08 | 0,887555241 | 0,05  | 0,945980281 | 0,24  | 0,836779352 | 0,13  | 0,830129736 | 0,01  | 0,992370267 |
| Pxylp1 | 0,27  | 0,716985606 | -0,07 | 0,906234611 | 0,78  | 0,209534486 | 0,24  | 0,642906557 | 0,11  | 0,912683275 |
| Pycard | 0,84  | 0,424529546 | 1,05  | 0,098272554 | -1,37 | 0,034677498 | 0,87  | 0,109713406 | 0,01  | 0,991418175 |
| Pycr1  | 0,44  | 0,437077461 | -0,12 | 0,912394814 | -0,22 | 0,760930184 | 0,9   | 0,149359147 | -0,3  | 0,60563194  |
| Pycr2  | -0,7  | 0,178115829 | -0,65 | 0,470304029 | 0,35  | 0,704834115 | 0,74  | 0,220646497 | -0,5  | 0,596092228 |
| Pycl   | -0,41 | 0,389268664 | -0,35 | 0,420160652 | 0,45  | 0,509773785 | 0,61  | 0,074540949 | 0,04  | 0,961251206 |

|         |       |             |       |             |       |             |       |             |       |             |
|---------|-------|-------------|-------|-------------|-------|-------------|-------|-------------|-------|-------------|
| Pydc3   | 0,21  | 0,916116257 | 2,1   | 0,345409693 | -1,2  | 0,366234911 | -1,47 | 0,598657551 | 2,05  | 0,254886057 |
| Pydc4   | 2,88  | 0,017642506 | 1,51  | 0,407550166 | -1,75 | 0,097897914 | -1,38 | 0,406187448 | 2,3   | 0,043727018 |
| Pygb    | -0,72 | 0,154960518 | -0,45 | 0,286908359 | 1,17  | 0,108206799 | 0,63  | 0,073597055 | -0,21 | 0,716659497 |
| Pygl    | -0,09 | 0,926007268 | 0,59  | 0,469830103 | -0,63 | 0,713492795 | -0,51 | 0,678790333 | -0,86 | 0,464932526 |
| Pygm    | 0,48  | 0,703606438 | -0,2  | 0,730760736 | 0,49  | 0,560847022 | -1,42 | 0,042082146 | -0,86 | 0,389664866 |
| Pygo1   | -0,05 | 0,960980727 | -0,16 | 0,882931058 | -0,06 | 0,948637233 | 0,09  | 0,881329404 | -0,18 | 0,845218636 |
| Pygo2   | -0,13 | 0,878548823 | 0,24  | 0,804394095 | 0,07  | 0,955984004 | -0,21 | 0,69562231  | 0,01  | 0,992370267 |
| Pyhin1  | 1,73  | 0,085632017 | 1,69  | 0,187729631 | -1,23 | 0,169619185 | 1,31  | 0,398111638 | 3,82  | 0,023716985 |
| Pym1    | -0,02 | 0,98456417  | 0,28  | 0,568282579 | -0,14 | 0,867589536 | -0,48 | 0,326494115 | 0,02  | 0,984632256 |
| Pyroxd1 | -0,19 | 0,77780674  | 0,33  | 0,771641267 | 0,78  | 0,406290886 | -0,62 | 0,437773588 | 0,06  | 0,961406182 |
| Pyroxd2 | 0,05  | 0,966775766 | 0,37  | 0,677026666 | 0,27  | 0,715407764 | -0,91 | 0,091159146 | -1    | 0,090363451 |
| Pyurf   | -0,69 | 0,194451699 | -0,28 | 0,66864205  | 0,5   | 0,271623872 | 0,21  | 0,625019874 | -0,36 | 0,521841588 |
| Pyy     | -0,16 | 0,882500171 | -0,13 | 0,95830747  | -0,39 | 0,777918093 | 0,06  | 0,970163463 | 0,39  | 0,45731544  |
| Pzp     | 0,15  | 0,882060783 | -0,11 | 0,922703368 | -0,1  | 0,925245169 | 0,52  | 0,384319247 | 0,08  | 0,939248399 |
| Qars    | -0,21 | 0,639039342 | -0,31 | 0,625418479 | 0,68  | 0,215429632 | 0,74  | 0,09552555  | -0,05 | 0,97206128  |
| Qdpr    | -0,71 | 0,176589418 | -0,07 | 0,898952381 | -0,32 | 0,830336321 | 0,47  | 0,612756217 | 0,12  | 0,94245402  |
| Qk      | -0,19 | 0,718369124 | -0,28 | 0,506579276 | 0,14  | 0,848485609 | 0,02  | 0,963752888 | 0,39  | 0,38669303  |
| Qpct    | -1,05 | 0,137844388 | -0,59 | 0,311099792 | 0,8   | 0,27037497  | -3,2  | 0,01321417  | -0,43 | 0,671441327 |
| Qpctl   | -0,28 | 0,589547327 | 0,2   | 0,787285346 | 0,04  | 0,977827235 | -0,19 | 0,653400029 | -0,66 | 0,268016026 |
| Qprt    | 0,29  | 0,618567097 | -0,31 | 0,57861935  | -0,13 | 0,83442082  | 0,28  | 0,671991774 | 0     | 0,998444219 |
| Qrfp    | -0,29 | 0,600952042 | 0,03  | 0,975700812 | 0,05  | 0,950725218 | -0,21 | 0,722185959 | -0,15 | 0,829996445 |
| Qrfpr   | 0,26  | 0,794063226 | -0,3  | 0,815708197 | -0,4  | 0,581148105 | 0,53  | 0,435922496 | 1,06  | 0,381486385 |
| Qrich1  | 0,15  | 0,783200207 | -0,13 | 0,884894523 | -0,07 | 0,94272403  | 0,48  | 0,5069703   | 0,52  | 0,550083777 |
| Qrich2  | -0,12 | 0,872998906 | 0,21  | 0,854940418 | 0,05  | 0,963221639 | -0,15 | 0,682774206 | 0,03  | 0,976743304 |
| Qrsl1   | -0,11 | 0,914090929 | -0,16 | 0,85726965  | 0,03  | 0,985347628 | -0,35 | 0,522894482 | -0,31 | 0,702402249 |
| Qser1   | -0,18 | 0,881663401 | -0,12 | 0,916213167 | 0,17  | 0,822658666 | 0,02  | 0,990647431 | -0,37 | 0,748520754 |
| Qsox1   | -0,02 | 0,96901392  | -0,04 | 0,945920068 | -0,1  | 0,917694073 | 0,1   | 0,902593917 | -0,39 | 0,573801069 |
| Qsox2   | -0,34 | 0,571926173 | -0,27 | 0,656204868 | 0,5   | 0,498736751 | 0,19  | 0,766621599 | -0,04 | 0,97425848  |
| Qtrt1   | -0,46 | 0,599317541 | 0,1   | 0,828818891 | 0,07  | 0,957152002 | 0,54  | 0,300023863 | 0,02  | 0,981439632 |
| Qtrtd1  | -0,55 | 0,28187256  | 0,18  | 0,898238238 | 0,97  | 0,097897914 | -0,64 | 0,211107876 | -0,53 | 0,466675179 |
| R3hcc1  | -0,42 | 0,567790521 | -0,13 | 0,808498635 | -0,14 | 0,873867385 | 0,05  | 0,959921588 | -0,78 | 0,20963273  |
| R3hcc1l | 0,48  | 0,340269831 | 0,41  | 0,638366221 | 0,06  | 0,957041977 | 0,04  | 0,939298189 | 0,03  | 0,97683359  |
| R3hdm1  | -0,21 | 0,64621704  | 0,09  | 0,897574732 | 0,38  | 0,611039768 | 0,3   | 0,439760247 | -0,03 | 0,975441362 |
| R3hdm2  | -0,08 | 0,930612466 | -0,01 | 0,98230594  | 0,3   | 0,636357295 | 0,02  | 0,972244785 | 0,11  | 0,884640084 |
| R3hdm4  | -0,31 | 0,440874786 | -0,08 | 0,924201582 | 0,6   | 0,186321498 | 0,32  | 0,407097145 | -0,59 | 0,166229459 |

|              |       |             |       |             |       |             |       |             |       |             |
|--------------|-------|-------------|-------|-------------|-------|-------------|-------|-------------|-------|-------------|
| R3hdml       | -0,32 | 0,586753542 | -0,06 | 0,916730432 | -0,28 | 0,730738549 | 0,45  | 0,213861016 | 0,06  | 0,944318268 |
| R74862       | -0,3  | 0,458591721 | -0,07 | 0,937136673 | 0,09  | 0,910060392 | 0,12  | 0,810891431 | -0,36 | 0,590396118 |
| Rab10        | 0,06  | 0,914758024 | -0,04 | 0,938887376 | -0,28 | 0,697890099 | 0,25  | 0,488775643 | 0,23  | 0,692895938 |
| Rab10os      | 0,13  | 0,859481811 | -0,07 | 0,970832543 | 0,65  | 0,436827113 | -0,47 | 0,325207897 | -0,02 | 0,979456872 |
| Rab11a       | 0,04  | 0,933253663 | -0,05 | 0,919762719 | 0,02  | 0,988373086 | 0,19  | 0,591667894 | 0,06  | 0,939938036 |
| Rab11b       | -0,3  | 0,509815996 | 0,01  | 0,996259587 | 0,15  | 0,811973717 | 0,3   | 0,65865291  | -0,15 | 0,898326354 |
| Rab11fip1    | -0,13 | 0,869085391 | -0,35 | 0,765705056 | 0,21  | 0,859578966 | -0,48 | 0,188401154 | -0,39 | 0,505878125 |
| Rab11fip2    | 0,52  | 0,366798181 | 0,69  | 0,435489861 | -1,02 | 0,040146106 | 0,92  | 0,100206405 | 0,82  | 0,45731544  |
| Rab11fip3    | -0,08 | 0,921565185 | -0,23 | 0,610418322 | 0,47  | 0,513307287 | -0,37 | 0,28373461  | -0,12 | 0,840952901 |
| Rab11fip4    | 0,18  | 0,8634587   | 0,48  | 0,468035796 | 0,04  | 0,961680587 | -0,06 | 0,923403061 | 0,15  | 0,823098095 |
| Rab11fip4os1 | 0,42  | 0,437838705 | 0,3   | 0,80097084  | -0,02 | 0,979791644 | -0,09 | 0,898801714 | 0     | 0,999775166 |
| Rab11fip4os2 | 0,05  | 0,966775766 | 0,23  | 0,745921616 | -0,44 | 0,398303268 | -0,55 | 0,34223913  | -0,17 | 0,864540232 |
| Rab11fip5    | -0,48 | 0,214139353 | 0,1   | 0,852508828 | 0,15  | 0,841464759 | 0,63  | 0,137576047 | -0,21 | 0,759648741 |
| Rab12        | 0,07  | 0,94727537  | -0,26 | 0,644516897 | -0,16 | 0,79541037  | 0,58  | 0,143104121 | 0,17  | 0,830813323 |
| Rab13        | -0,43 | 0,621072378 | -0,03 | 0,974580396 | 0,26  | 0,736935123 | 0,3   | 0,523255995 | -0,33 | 0,767285294 |
| Rab14        | 0,19  | 0,695486797 | 0,05  | 0,930849936 | -0,03 | 0,96858449  | 0,22  | 0,599431454 | 0,14  | 0,858534673 |
| Rab15        | -0,01 | 0,996998625 | 0,22  | 0,804166367 | 0,1   | 0,962766843 | -0,07 | 0,92940381  | 0,44  | 0,532211771 |
| Rab17        | -0,28 | 0,593540946 | 0,3   | 0,839789639 | -0,03 | 0,989417324 | -0,17 | 0,779547737 | -0,2  | 0,79265811  |
| Rab18        | -0,36 | 0,605165994 | -0,35 | 0,758932518 | -0,8  | 0,375756922 | -0,07 | 0,874607411 | -0,54 | 0,24120873  |
| Rab19        | -0,07 | 0,920453459 | 0,15  | 0,903682621 | -0,2  | 0,801180503 | 0,12  | 0,896599656 | 0,42  | 0,434320524 |
| Rab1a        | -0,12 | 0,782889069 | 0,02  | 0,985148348 | 0,15  | 0,840730961 | 0,34  | 0,332144678 | -0,18 | 0,768935432 |
| Rab1b        | -0,46 | 0,277154156 | -0,29 | 0,614530823 | 0,25  | 0,693902137 | 0,32  | 0,340996498 | -0,27 | 0,630504264 |
| Rab20        | 0,98  | 0,13138211  | 0,73  | 0,156759607 | -0,21 | 0,760793265 | 0,62  | 0,221648142 | 0,65  | 0,286741573 |
| Rab21        | -0,38 | 0,597519827 | 0,46  | 0,664787536 | -0,2  | 0,898382247 | -0,14 | 0,817794705 | 0,18  | 0,815694752 |
| Rab22a       | 0,22  | 0,739033649 | -0,04 | 0,970577887 | 0,4   | 0,71507515  | 0,47  | 0,443514966 | 0,42  | 0,59585005  |
| Rab23        | -0,69 | 0,216640338 | 0,12  | 0,825192868 | 0,94  | 0,13651324  | -0,73 | 0,632621178 | -0,09 | 0,973576804 |
| Rab24        | -0,01 | 0,990894139 | -0,19 | 0,7671393   | -0,28 | 0,70398922  | 0,1   | 0,825332212 | -0,19 | 0,78532501  |
| Rab25        | -0,21 | 0,786709661 | -0,23 | 0,857503073 | 0,03  | 0,984879454 | 0,84  | 0,259624671 | 0,47  | 0,603995357 |
| Rab26        | 0,31  | 0,775148192 | -0,07 | 0,935984823 | -0,38 | 0,608004829 | 0,17  | 0,797251298 | 0,08  | 0,947190443 |
| Rab26os      | -0,74 | 0,38528369  | -0,26 | 0,610227242 | -0,12 | 0,86306443  | -0,28 | 0,780675133 | 0,27  | 0,80222716  |
| Rab27a       | -0,23 | 0,717407143 | -0,54 | 0,73274163  | 0,47  | 0,593455611 | 0,28  | 0,78823414  | -0,52 | 0,623304657 |
| Rab27b       | -0,05 | 0,951838266 | -0,44 | 0,508633526 | 0,52  | 0,343594254 | 0,69  | 0,230297952 | 0,47  | 0,531168722 |
| Rab28        | 0,03  | 0,975179875 | -0,38 | 0,736079547 | -0,11 | 0,943472333 | -0,19 | 0,766679066 | -0,24 | 0,736133095 |
| Rab29        | 0,32  | 0,534265938 | -0,2  | 0,728020346 | -0,32 | 0,73893881  | 1,33  | 0,090453512 | 0,42  | 0,644890641 |
| Rab2a        | 0,09  | 0,846344799 | -0,04 | 0,944349738 | 0,21  | 0,706714392 | 0,51  | 0,186888387 | 0     | 0,999572304 |

|          |       |             |       |             |       |             |       |             |       |             |
|----------|-------|-------------|-------|-------------|-------|-------------|-------|-------------|-------|-------------|
| Rab2b    | 0,56  | 0,446074179 | 0,39  | 0,500563679 | -0,69 | 0,36121902  | -0,32 | 0,602836213 | -0,14 | 0,913274952 |
| Rab30    | -0,2  | 0,804600477 | 0,15  | 0,882589938 | 0,15  | 0,86935713  | -0,09 | 0,872181936 | -0,02 | 0,987680175 |
| Rab31    | -0,3  | 0,421957622 | -0,35 | 0,342987643 | -0,34 | 0,618076995 | 0,22  | 0,661795846 | -0,46 | 0,423150425 |
| Rab32    | 0,71  | 0,307798337 | 0,36  | 0,568187167 | 0,26  | 0,827761588 | 0,9   | 0,234010416 | -0,55 | 0,562561822 |
| Rab33a   | 0,2   | 0,804126753 | -0,11 | 0,941624351 | -0,29 | 0,72066129  | 0,19  | 0,809215992 | 0,11  | 0,936204843 |
| Rab33b   | 0     | 0,996998625 | 0,01  | 0,989521494 | 0,2   | 0,736837174 | -0,46 | 0,284374871 | 0,17  | 0,85439479  |
| Rab34    | -0,62 | 0,440900235 | -0,25 | 0,705532323 | 0,59  | 0,264273523 | -0,79 | 0,135202113 | -0,19 | 0,793507407 |
| Rab35    | -0,24 | 0,637135317 | 0,12  | 0,880363126 | 0,13  | 0,829426046 | 0,01  | 0,987229847 | -0,29 | 0,579548723 |
| Rab36    | 0,09  | 0,896249068 | 0,1   | 0,943436096 | 0,29  | 0,655876476 | -0,49 | 0,500410075 | -0,67 | 0,211693235 |
| Rab37    | 0,01  | 0,992736909 | 0,28  | 0,654217577 | -0,27 | 0,611144549 | -0,36 | 0,385212595 | 0,13  | 0,890744062 |
| Rab38    | 0,73  | 0,111844532 | 0,17  | 0,92046066  | -0,47 | 0,574724946 | -0,27 | 0,845617958 | -0,14 | 0,937446198 |
| Rab39    | 0,16  | 0,756942192 | -0,43 | 0,441083677 | -0,02 | 0,990836784 | 0,25  | 0,588987424 | -0,55 | 0,375162254 |
| Rab39b   | -0,39 | 0,378598836 | -0,35 | 0,366519283 | -0,13 | 0,832463529 | -0,04 | 0,947809027 | -0,11 | 0,91314596  |
| Rab3a    | -0,93 | 0,201594044 | -0,68 | 0,587547138 | 0,53  | 0,413379282 | -0,48 | 0,128164731 | -0,71 | 0,220768726 |
| Rab3b    | -0,19 | 0,913921068 | -0,27 | 0,907700167 | -0,26 | 0,61483831  | 0,61  | 0,328472681 | -0,82 | 0,419557334 |
| Rab3c    | 0,37  | 0,59710379  | -0,31 | 0,521981781 | 0,01  | 0,993772233 | 0,16  | 0,845164782 | -0,34 | 0,78512653  |
| Rab3d    | -0,31 | 0,687662951 | 0,11  | 0,945374636 | 1,54  | 0,138770182 | -0,93 | 0,027401066 | -1,05 | 0,048627677 |
| Rab3gap1 | 0,31  | 0,518267881 | -0,47 | 0,487771533 | 1,39  | 0,067624618 | 0,56  | 0,287840988 | 0,21  | 0,835099829 |
| Rab3gap2 | -0,31 | 0,418088138 | -0,31 | 0,571026746 | 0,27  | 0,722052457 | 0,29  | 0,471397735 | -0,26 | 0,608004947 |
| Rab3il1  | -0,82 | 0,190435045 | -0,32 | 0,796382388 | 0,43  | 0,660561609 | 0,08  | 0,967758979 | -0,03 | 0,989179767 |
| Rab3ip   | 0,25  | 0,791297234 | 0,39  | 0,680709276 | -0,47 | 0,504301089 | 0,92  | 0,129154295 | 2,03  | 0,018894828 |
| Rab40b   | -0,19 | 0,688110215 | 0,14  | 0,900801202 | 0,07  | 0,94665439  | -0,15 | 0,778817721 | 0,08  | 0,923530475 |
| Rab40c   | -0,59 | 0,364262409 | -0,14 | 0,901002199 | -0,03 | 0,978138153 | 0,58  | 0,530537289 | -0,28 | 0,794006294 |
| Rab42    | -0,12 | 0,903817676 | 0,11  | 0,843493142 | 0,28  | 0,757498725 | -0,27 | 0,719119218 | -0,78 | 0,363327544 |
| Rab43    | 0,15  | 0,849474387 | 0,16  | 0,764950118 | -0,01 | 0,993686224 | 0,02  | 0,965653854 | -0,17 | 0,824818547 |
| Rab44    | 0,26  | 0,599011121 | 0,23  | 0,661566887 | 0,08  | 0,946810097 | -0,05 | 0,949166455 | 0,01  | 0,991980521 |
| Rab4b    | -0,2  | 0,701624105 | 0     | 1           | 0,11  | 0,880622107 | 0,35  | 0,307744759 | -0,3  | 0,537240604 |
| Rab5a    | -0,35 | 0,552070283 | 0,1   | 0,849099971 | 0,42  | 0,475629395 | 0,4   | 0,246085743 | 0,23  | 0,661912448 |
| Rab5b    | -0,08 | 0,910350967 | 0,42  | 0,438549879 | -0,54 | 0,392627618 | -0,31 | 0,675340376 | 0,16  | 0,892355748 |
| Rab5c    | 0,17  | 0,712228447 | 0,06  | 0,90891146  | -0,08 | 0,911506558 | 0,5   | 0,142582453 | 0,44  | 0,346714412 |
| Rab6a    | -0,13 | 0,854988906 | 0,24  | 0,667502888 | -0,21 | 0,777918093 | 0,33  | 0,380448921 | 0,17  | 0,765327693 |
| Rab6b    | -0,77 | 0,194613044 | 0,31  | 0,821056656 | -0,8  | 0,42710453  | -1,54 | 0,028363085 | -0,86 | 0,084101113 |
| Rab7     | 0,3   | 0,405822217 | 0,23  | 0,722000016 | -0,46 | 0,380386397 | -0,11 | 0,823795118 | 0,15  | 0,7983507   |
| Rab7b    | 0,3   | 0,669841006 | 0,23  | 0,842663656 | 0     | 0,999715683 | -0,21 | 0,848743408 | -0,19 | 0,917030581 |
| Rab8a    | -0,14 | 0,806351733 | -0,06 | 0,919873208 | -0,38 | 0,433481425 | -0,06 | 0,921731995 | -0,26 | 0,665051452 |

|          |       |             |       |             |       |             |       |             |       |             |
|----------|-------|-------------|-------|-------------|-------|-------------|-------|-------------|-------|-------------|
| Rab8b    | 0,17  | 0,771904131 | 0,78  | 0,223537    | -0,43 | 0,58160408  | 0,69  | 0,394707364 | 0,99  | 0,2047166   |
| Rab9     | 0,55  | 0,226401875 | 0,26  | 0,566144068 | -0,39 | 0,457740325 | 0,3   | 0,356776772 | 0,7   | 0,126807629 |
| Rab9b    | 0,11  | 0,87510428  | 0,04  | 0,990052916 | -0,24 | 0,825914825 | 0,1   | 0,908141892 | -0,01 | 0,993865559 |
| Rabac1   | 0,07  | 0,869236842 | -0,05 | 0,925569254 | 0,05  | 0,950725218 | -0,46 | 0,158995356 | -0,08 | 0,910721379 |
| Rabep1   | -0,12 | 0,856959665 | -0,09 | 0,933320126 | -0,28 | 0,80014996  | -0,07 | 0,959203776 | -0,32 | 0,751268314 |
| Rabep2   | -0,06 | 0,925460743 | 0,02  | 0,979406438 | -0,43 | 0,462123525 | -0,09 | 0,814511609 | -0,24 | 0,687240111 |
| Rabepk   | -0,07 | 0,875464288 | 0,07  | 0,94021592  | 0,14  | 0,825914825 | 0,32  | 0,837628396 | -0,37 | 0,847190413 |
| Rabgap1  | -0,08 | 0,886680488 | 0,41  | 0,50114688  | -0,17 | 0,804716642 | -0,43 | 0,366796583 | 0,02  | 0,980961333 |
| Rabgap1l | 0,23  | 0,604260074 | 0,51  | 0,379721127 | -0,31 | 0,670651232 | -0,36 | 0,325923875 | -0,07 | 0,946155238 |
| Rabgef1  | 0,47  | 0,324465563 | 0,19  | 0,732847182 | -0,04 | 0,953738148 | 0,71  | 0,121906734 | -0,12 | 0,861657025 |
| Rabggt   | 0,12  | 0,830050953 | 0,38  | 0,459417799 | 0,1   | 0,897932497 | 0,07  | 0,896599656 | -0,04 | 0,970154126 |
| Rabggtb  | 0,24  | 0,669220209 | 0,35  | 0,363748564 | -0,44 | 0,519123199 | 0,63  | 0,103970767 | 0,58  | 0,21822854  |
| Rabif    | -0,17 | 0,780020938 | -0,07 | 0,922703368 | 0,2   | 0,742757109 | 0,14  | 0,785996319 | 0,33  | 0,512907543 |
| Rabl2    | -0,09 | 0,94881239  | -0,14 | 0,895304965 | -0,06 | 0,973732268 | 0,89  | 0,074454367 | -0,45 | 0,383178627 |
| Rabl3    | -0,36 | 0,632511582 | -0,75 | 0,450692213 | 0,31  | 0,856046789 | 0,12  | 0,937580292 | -1,17 | 0,256989438 |
| Rabl6    | -0,14 | 0,829299665 | -0,26 | 0,614530823 | 0,29  | 0,714346477 | 0,37  | 0,391503162 | -0,06 | 0,950308536 |
| Rac1     | -0,1  | 0,812327104 | -0,16 | 0,688435265 | -0,06 | 0,929395646 | 0,05  | 0,909976349 | -0,16 | 0,782552648 |
| Rac2     | 0,19  | 0,845591898 | 0,09  | 0,965039248 | -0,49 | 0,737241227 | -0,37 | 0,380741558 | 0,45  | 0,629481302 |
| Rac3     | 0,21  | 0,674821764 | 0,05  | 0,936502479 | -0,46 | 0,462643491 | 0,05  | 0,92123654  | 0,13  | 0,901183842 |
| Racgap1  | -1,48 | 0,124327015 | -1,52 | 0,118661465 | 1,66  | 0,045278475 | 2,73  | 0,056397205 | -0,2  | 0,912733818 |
| Rack1    | -0,14 | 0,770253953 | -0,05 | 0,953747513 | 0,28  | 0,549186001 | 0,85  | 0,065300889 | -0,01 | 0,991628025 |
| Rad1     | 0,45  | 0,421029929 | -0,33 | 0,592545788 | 0,08  | 0,966297296 | -0,03 | 0,984883981 | -0,07 | 0,953764773 |
| Rad17    | 0,06  | 0,927686801 | 0,09  | 0,940988583 | -0,31 | 0,709814408 | 0,05  | 0,963001955 | 0,03  | 0,981439632 |
| Rad18    | -0,02 | 0,975506993 | 0,28  | 0,75677674  | 0,78  | 0,448223613 | 1,07  | 0,183183685 | 0,72  | 0,360718516 |
| Rad21    | -0,23 | 0,568473441 | -0,31 | 0,641052915 | 0,5   | 0,322706681 | 0,06  | 0,939928188 | -0,26 | 0,72210597  |
| Rad21l   | 0,08  | 0,898116888 | 0,37  | 0,33799047  | 0,04  | 0,96186488  | -0,45 | 0,250749402 | -0,06 | 0,947559952 |
| Rad23a   | -0,06 | 0,922091919 | -0,06 | 0,948564384 | -0,11 | 0,89248624  | -0,4  | 0,336752815 | -0,02 | 0,984632256 |
| Rad23b   | -0,2  | 0,642618049 | -0,02 | 0,9860901   | -0,19 | 0,732540375 | 0,75  | 0,087280832 | 0     | 0,997374433 |
| Rad50    | -0,63 | 0,263040496 | -0,26 | 0,829248009 | 1,57  | 0,191354318 | 0,18  | 0,875473756 | -0,22 | 0,823098095 |
| Rad51    | -1,51 | 0,092891216 | -2,56 | 0,173433171 | 1,82  | 0,071513813 | 2,75  | 0,05745194  | -0,39 | 0,684349871 |
| Rad51ap1 | -0,41 | 0,728516314 | -1,72 | 0,163615337 | 1,17  | 0,243511638 | 2,1   | 0,022696538 | 0,04  | 0,966358058 |
| Rad51ap2 | 0,06  | 0,972682121 | 0,53  | 0,648353961 | -0,01 | 0,993280531 | -0,78 | 0,181658499 | -0,42 | 0,506582393 |
| Rad51b   | -0,31 | 0,617280733 | -1,03 | 0,335724646 | 0,4   | 0,751090942 | 0,77  | 0,048895064 | -0,26 | 0,728483022 |
| Rad51c   | -0,58 | 0,500740935 | -0,64 | 0,371529423 | 0,37  | 0,640924712 | 0,24  | 0,772462401 | -0,08 | 0,951075094 |
| Rad51d   | -0,29 | 0,792328154 | 0,47  | 0,729172466 | -0,47 | 0,813110365 | -0,32 | 0,75485675  | -0,06 | 0,97425848  |

|          |       |             |       |             |       |             |       |             |       |             |
|----------|-------|-------------|-------|-------------|-------|-------------|-------|-------------|-------|-------------|
| Rad52    | 0,24  | 0,723916994 | 0,05  | 0,950607777 | -0,43 | 0,533023142 | 0,22  | 0,760235732 | 0,1   | 0,947430588 |
| Rad54b   | -0,66 | 0,189684245 | -0,55 | 0,298168653 | 1     | 0,302287376 | 0,52  | 0,131650622 | 0,44  | 0,367460826 |
| Rad54l   | -0,69 | 0,193430471 | -1,61 | 0,230688117 | 0,53  | 0,570360359 | 1,17  | 0,264486163 | -0,2  | 0,855741842 |
| Rad54l2  | -0,14 | 0,831253977 | -0,25 | 0,721972544 | 0,09  | 0,933297829 | 0,26  | 0,672111    | -0,38 | 0,507600858 |
| Rad9a    | -0,24 | 0,697535164 | 0,03  | 0,980615989 | 0,89  | 0,411079504 | -0,28 | 0,454995407 | -0,16 | 0,840515079 |
| Rad9b    | -0,66 | 0,422775151 | -0,25 | 0,700831651 | 0,42  | 0,627793773 | -0,75 | 0,218670418 | -0,48 | 0,68987325  |
| Radil    | -0,36 | 0,50667946  | 0,3   | 0,732847182 | 0,24  | 0,703647945 | -0,6  | 0,283608652 | -0,26 | 0,788112596 |
| Rae1     | -0,8  | 0,279022727 | -0,45 | 0,318798133 | 0,47  | 0,460914763 | 0,7   | 0,116706163 | -0,07 | 0,941241684 |
| Raet1d   | 0,08  | 0,926452636 | -0,53 | 0,493525791 | -0,3  | 0,81820534  | 6,46  | 0,003009221 | 0,21  | 0,80312229  |
| Raet1e   | -0,1  | 0,853102183 | -0,46 | 0,453958512 | 0,9   | 0,268035189 | 3,22  | 0,032976239 | -0,59 | 0,673577848 |
| Raf1     | -0,13 | 0,818611891 | 0,63  | 0,188301476 | -0,07 | 0,929871006 | -0,23 | 0,658080231 | 0,63  | 0,296825623 |
| Rag1     | -0,01 | 0,992533909 | -0,38 | 0,707071624 | -0,34 | 0,588987171 | 0,07  | 0,911958998 | 0,25  | 0,782463903 |
| Rag2     | 0,22  | 0,576695743 | 0,09  | 0,898701949 | -0,05 | 0,95084013  | -0,81 | 0,049602695 | -0,71 | 0,397713317 |
| Rai1     | -0,26 | 0,497195909 | -0,52 | 0,268436493 | -0,29 | 0,691009366 | -0,1  | 0,819761923 | -0,16 | 0,828679046 |
| Rai14    | 0,53  | 0,280722013 | 0,14  | 0,748874675 | -1,14 | 0,00990492  | 0,33  | 0,304581915 | 0,86  | 0,055628724 |
| Rai2     | -0,09 | 0,896249068 | 0,16  | 0,881876659 | -0,17 | 0,760389106 | -1,25 | 0,171625869 | 0,1   | 0,951646452 |
| Rala     | 0,12  | 0,832696131 | -0,01 | 0,994486533 | 0,26  | 0,787263121 | 0,44  | 0,210200767 | 0,2   | 0,777281438 |
| Ralb     | -0,41 | 0,272505756 | -0,3  | 0,55893837  | -0,03 | 0,967767582 | 0,79  | 0,098577249 | -0,16 | 0,830013971 |
| Ralbp1   | -0,18 | 0,769930687 | -0,12 | 0,882847123 | 0,24  | 0,765554132 | -0,1  | 0,831764227 | -0,34 | 0,486708315 |
| Ralgapa1 | -0,16 | 0,770273483 | 0,08  | 0,896381982 | -0,82 | 0,049481789 | 0,06  | 0,898791139 | 0,26  | 0,640213665 |
| Ralgapa2 | -0,04 | 0,970938013 | 0,15  | 0,917256002 | 0,14  | 0,909963525 | 0,5   | 0,179012087 | -0,38 | 0,697818445 |
| Ralgapb  | -0,12 | 0,879499432 | 0,23  | 0,703725851 | 0,21  | 0,799586974 | -0,34 | 0,672379685 | -0,1  | 0,944318268 |
| Ralgds   | -0,01 | 0,991919022 | 0,16  | 0,825210924 | 0,36  | 0,440550754 | 2,03  | 0,013836074 | 0,16  | 0,861977667 |
| Ralgps1  | 0,27  | 0,781344489 | -0,2  | 0,826265098 | 0,09  | 0,9241587   | -0,08 | 0,845813504 | 0     | 0,997254437 |
| Ralgps2  | 0,3   | 0,841140165 | -0,21 | 0,854940418 | -0,2  | 0,902672106 | -0,37 | 0,45275844  | -0,57 | 0,216124082 |
| Raly     | -0,12 | 0,837426978 | -0,14 | 0,79295936  | 0,35  | 0,530404705 | 0,28  | 0,562232092 | 0,28  | 0,653699067 |
| Ralyl    | -0,04 | 0,957427783 | -0,07 | 0,936792848 | 0,04  | 0,971268254 | 0,27  | 0,502210241 | 0,05  | 0,958856121 |
| Ramp1    | 0,45  | 0,36240006  | -0,17 | 0,758037461 | -0,45 | 0,545465016 | -0,18 | 0,847253572 | -0,1  | 0,937446198 |
| Ramp2    | 0,12  | 0,777335496 | -0,05 | 0,927073711 | 0,16  | 0,894018349 | -0,07 | 0,861959213 | -0,27 | 0,58604555  |
| Ramp3    | 0,12  | 0,891529384 | 0,58  | 0,585138173 | 0,27  | 0,788975886 | -4,73 | 0,004876398 | -0,56 | 0,340006862 |
| Ran      | -0,34 | 0,445366588 | -0,64 | 0,269611189 | 0,56  | 0,207303816 | 0,9   | 0,078778407 | 0,17  | 0,793839436 |
| Ranbp1   | -0,06 | 0,936194979 | -0,73 | 0,157192993 | 0,65  | 0,308684702 | 1,13  | 0,037611998 | 0     | 0,99921137  |
| Ranbp10  | -0,17 | 0,756942192 | 0     | 0,998513452 | 0,19  | 0,830336321 | 0,11  | 0,785603422 | -0,35 | 0,446990293 |
| Ranbp17  | -1,69 | 0,093379419 | -0,69 | 0,533804963 | 0,96  | 0,179552168 | 0,2   | 0,897454817 | -1,14 | 0,41050164  |
| Ranbp2   | -0,02 | 0,983516046 | 0,24  | 0,565603216 | 0,22  | 0,654841851 | -0,15 | 0,810891431 | 0,2   | 0,80222716  |



|            |       |             |       |             |       |             |       |             |       |             |
|------------|-------|-------------|-------|-------------|-------|-------------|-------|-------------|-------|-------------|
| Ranbp3     | -0,14 | 0,778723429 | -0,26 | 0,630975718 | 0,22  | 0,695705149 | 0,09  | 0,875265854 | -0,08 | 0,919325625 |
| Ranbp3l    | 0,09  | 0,923035054 | 0,07  | 0,956049982 | 0,04  | 0,973690509 | -1,31 | 0,034677724 | -0,05 | 0,982577187 |
| Ranbp6     | -0,86 | 0,179751021 | 0,2   | 0,750325684 | 0,2   | 0,830228543 | -0,38 | 0,45066916  | 0,41  | 0,59705803  |
| Ranbp9     | 0,04  | 0,950829291 | 0,2   | 0,763796207 | -0,2  | 0,820614211 | -0,01 | 0,991962381 | 0,02  | 0,984125319 |
| Rangap1    | -0,48 | 0,272486093 | -0,34 | 0,545116169 | 0,22  | 0,775163644 | 1,43  | 0,130097335 | -0,1  | 0,948163009 |
| Rap1a      | 0     | 0,996998625 | -0,19 | 0,756778611 | 0,2   | 0,740266312 | 0,49  | 0,140538478 | 0,15  | 0,799199452 |
| Rap1b      | 0,01  | 0,990404752 | 0,05  | 0,920677001 | 0,07  | 0,928928183 | 0,01  | 0,97920606  | 0,31  | 0,541376431 |
| Rap1gap    | 0,22  | 0,78682706  | 0,55  | 0,319414606 | 0,78  | 0,316070595 | -0,82 | 0,040750961 | 0,24  | 0,697757911 |
| Rap1gap2   | -0,22 | 0,829838991 | 0,55  | 0,514228058 | 0,32  | 0,727548313 | -0,44 | 0,675229982 | 0,33  | 0,783143364 |
| Rap1gapos  | -0,16 | 0,772937761 | -0,03 | 0,970832543 | -0,28 | 0,636200061 | 0,31  | 0,421316851 | 0,02  | 0,980945466 |
| Rap1gds1   | 0,26  | 0,786024966 | 0,23  | 0,547180632 | -0,3  | 0,712697139 | 0,35  | 0,561974208 | 0,13  | 0,921063662 |
| Rap2a      | -0,21 | 0,686076441 | -0,07 | 0,89081665  | 0,02  | 0,989588952 | -0,17 | 0,615320175 | -0,14 | 0,812818127 |
| Rap2b      | -0,14 | 0,810982642 | -0,14 | 0,851085879 | 1,25  | 0,076620682 | 1,65  | 0,021908076 | -0,54 | 0,459738349 |
| Rap2c      | 0,5   | 0,489042022 | 0,33  | 0,572250784 | -0,36 | 0,689298982 | 0,59  | 0,192863761 | -0,73 | 0,403234311 |
| Rapgef1    | -0,13 | 0,780861943 | -0,23 | 0,620236896 | -0,05 | 0,950725218 | 0,55  | 0,097755932 | -0,44 | 0,391113982 |
| Rapgef2    | -0,03 | 0,982213914 | 0,43  | 0,561562373 | 0,14  | 0,862480223 | -0,75 | 0,149866673 | -0,12 | 0,893225952 |
| Rapgef3    | -0,64 | 0,470166881 | 0     | 0,997283484 | 0,31  | 0,681506338 | -1,23 | 0,011372371 | -0,29 | 0,554975763 |
| Rapgef4    | 0,17  | 0,736503749 | 0,09  | 0,920894784 | -0,6  | 0,430111053 | -0,69 | 0,235558038 | -0,37 | 0,590339443 |
| Rapgef4os3 | -0,1  | 0,902628825 | 0,22  | 0,791853725 | 0,04  | 0,97797604  | -0,09 | 0,88505759  | -0,11 | 0,889106241 |
| Rapgef5    | 0,29  | 0,464717154 | 0,22  | 0,688641724 | -0,44 | 0,309075044 | -0,56 | 0,114428278 | 0,22  | 0,705047619 |
| Rapgef6    | -0,07 | 0,94756262  | 0,13  | 0,829839151 | 0,08  | 0,934056359 | 0,21  | 0,781621482 | 0,17  | 0,862749128 |
| Rapgef11   | -0,21 | 0,793271991 | -0,45 | 0,802616913 | 0,51  | 0,255047612 | 0,17  | 0,915771779 | 0,22  | 0,89279723  |
| Raph1      | 0,07  | 0,924097714 | -0,23 | 0,796482292 | -0,15 | 0,863964732 | 0,82  | 0,192025746 | 0,04  | 0,96738578  |
| Rapsn      | 0,28  | 0,627312744 | 0,43  | 0,446315327 | 0,05  | 0,956570063 | -0,18 | 0,703043067 | -0,31 | 0,574285481 |
| Rara       | 0,16  | 0,703606438 | -0,01 | 0,996259587 | 0,07  | 0,925074157 | 0,07  | 0,889401797 | -0,18 | 0,76521225  |
| Rarb       | -0,51 | 0,27550648  | 0,34  | 0,692810551 | 0,52  | 0,532782802 | -2,59 | 0,013802165 | 0,38  | 0,669369357 |
| Rarg       | -0,59 | 0,227985082 | -0,38 | 0,461960796 | -0,3  | 0,625578952 | -1,15 | 0,024139895 | -0,13 | 0,866693394 |
| Rarres1    | 0,39  | 0,438318142 | 2,49  | 0,208445991 | -1,03 | 0,47804917  | 1,19  | 0,302214149 | -0,01 | 0,992607235 |
| Rarres2    | 0,41  | 0,701627731 | 2     | 0,126569583 | -0,9  | 0,391889599 | -1,77 | 0,034442689 | 0,01  | 0,995109577 |
| Rars       | 0,09  | 0,897481914 | 0,57  | 0,318798133 | -0,2  | 0,744387748 | 0,54  | 0,294345732 | 0,8   | 0,140794982 |
| Rars2      | 0,08  | 0,887422496 | 0,15  | 0,843012938 | -0,68 | 0,523960429 | 0,37  | 0,397950785 | -0,16 | 0,823098095 |
| Rasa1      | -0,12 | 0,91371237  | 0,12  | 0,898238238 | -0,1  | 0,935887545 | 0,26  | 0,606590988 | 0,03  | 0,982779069 |
| Rasa2      | 0,06  | 0,947509357 | -0,06 | 0,978528738 | -0,31 | 0,730738549 | 0,11  | 0,855218474 | -0,26 | 0,823098095 |
| Rasa3      | -0,58 | 0,268287537 | -0,48 | 0,539700767 | 0,07  | 0,938571299 | 1,7   | 0,007738248 | -0,17 | 0,803100068 |
| Rasa4      | -0,14 | 0,81630789  | -0,13 | 0,897574732 | -0,17 | 0,864411302 | -0,25 | 0,734672335 | 0,01  | 0,995043594 |

|          |       |             |       |             |       |             |       |             |       |             |
|----------|-------|-------------|-------|-------------|-------|-------------|-------|-------------|-------|-------------|
| Rasal1   | -0,23 | 0,701086418 | -0,56 | 0,459453311 | 0,85  | 0,221388606 | 1,65  | 0,021262879 | -0,03 | 0,976743304 |
| Rasal2   | -0,39 | 0,596550801 | -0,31 | 0,487771533 | 0,18  | 0,769819604 | 0,37  | 0,474484792 | -0,86 | 0,105259183 |
| Rasal3   | -0,16 | 0,816316218 | -0,02 | 0,982137548 | -0,08 | 0,948637233 | -0,08 | 0,927735789 | 0,62  | 0,345224141 |
| Rasd1    | -0,28 | 0,632635324 | 0,03  | 0,985291538 | -0,18 | 0,81590485  | -1,88 | 0,278825037 | 0,46  | 0,821727352 |
| Rasd2    | 0,27  | 0,656726345 | 0,01  | 0,996105203 | 0,24  | 0,723987482 | 0,14  | 0,814220979 | -0,27 | 0,648800064 |
| Rasef    | -0,07 | 0,905834527 | -0,14 | 0,815284238 | -0,09 | 0,887429895 | 0,63  | 0,128164731 | 0,27  | 0,731897025 |
| Rasgef1a | 0,18  | 0,858869926 | -0,43 | 0,631728257 | -0,3  | 0,739980283 | 0,04  | 0,964799895 | -0,35 | 0,776251218 |
| Rasgef1b | 0,15  | 0,882500171 | 0,33  | 0,646613262 | -0,51 | 0,228643094 | 2,26  | 0,005660788 | 1,06  | 0,128272484 |
| Rasgef1c | -0,18 | 0,802528943 | -0,16 | 0,831580851 | -0,23 | 0,754337745 | 0,29  | 0,40933447  | 0,19  | 0,755066705 |
| Rasgrf1  | -0,24 | 0,869565514 | -0,01 | 0,994486533 | -0,17 | 0,790693327 | 0,08  | 0,912525855 | 0,05  | 0,974553568 |
| Rasgrf2  | -0,87 | 0,190455459 | -0,32 | 0,613344994 | 0,09  | 0,953975807 | -2,38 | 0,016043404 | -0,69 | 0,288665356 |
| Rasgrp1  | -0,12 | 0,891955146 | -0,07 | 0,943915456 | -0,63 | 0,610313044 | -0,16 | 0,805169421 | -0,14 | 0,904836805 |
| Rasgrp2  | -0,45 | 0,666546952 | -0,42 | 0,619612553 | 0,35  | 0,720069267 | -2,72 | 0,005047331 | -1,86 | 0,013431226 |
| Rasgrp3  | -0,63 | 0,301226191 | -0,2  | 0,667097376 | 0,38  | 0,446611118 | 0,04  | 0,962670023 | -0,45 | 0,51509981  |
| Rasgrp4  | 0,38  | 0,299337884 | 0,07  | 0,900136342 | 0,2   | 0,794542194 | -0,98 | 0,21001567  | -0,47 | 0,640616198 |
| Rasip1   | -0,2  | 0,626246154 | -0,11 | 0,801257272 | 0,08  | 0,911506558 | -0,06 | 0,896893    | -0,19 | 0,735192953 |
| Rasl10a  | 0,05  | 0,948376096 | -0,32 | 0,705624794 | 0,26  | 0,715053761 | -1,02 | 0,161937858 | -0,7  | 0,258820768 |
| Rasl10b  | -0,19 | 0,844688163 | 0,07  | 0,910688765 | 0,3   | 0,765490406 | -0,21 | 0,648553343 | -0,07 | 0,949658983 |
| Rasl11a  | -0,44 | 0,374585301 | -0,71 | 0,426168855 | -0,09 | 0,955586257 | -1,98 | 0,190917389 | -0,92 | 0,497190175 |
| Rasl11b  | 0,24  | 0,839881823 | 0,84  | 0,379294339 | -0,88 | 0,48646529  | 1,47  | 0,167552848 | 1,26  | 0,236669428 |
| Rasl12   | -0,13 | 0,91960004  | 0,37  | 0,563002895 | 0,27  | 0,705492321 | -0,08 | 0,938209847 | 0,32  | 0,550083777 |
| Rasl2-9  | -0,37 | 0,716985606 | 0,31  | 0,653597085 | 0,36  | 0,636357295 | -0,21 | 0,667849424 | -0,02 | 0,990091016 |
| Rassf1   | -0,35 | 0,557114011 | 0,33  | 0,49761736  | 0,32  | 0,765783874 | -0,11 | 0,900334233 | 0,14  | 0,891925115 |
| Rassf10  | 0     | 0,999186158 | -0,11 | 0,85037533  | 0,25  | 0,709314442 | 0,12  | 0,795535136 | -0,03 | 0,974553568 |
| Rassf2   | 0,01  | 0,993175772 | 0,25  | 0,75247655  | -0,28 | 0,882540073 | 3     | 0,021172356 | 1,13  | 0,272986942 |
| Rassf3   | -0,45 | 0,324617125 | -0,04 | 0,945012055 | 0,02  | 0,979107341 | -0,29 | 0,353716436 | -0,42 | 0,388412166 |
| Rassf4   | 0,1   | 0,952262517 | -0,27 | 0,815022365 | 1,61  | 0,046547259 | 1,26  | 0,23493844  | -0,49 | 0,688537145 |
| Rassf5   | 0,34  | 0,728643996 | -0,11 | 0,927073711 | 0,38  | 0,656878693 | -0,47 | 0,642906557 | 0,25  | 0,85508146  |
| Rassf6   | 0,1   | 0,886741208 | 0,25  | 0,594415097 | 0,33  | 0,621483843 | -0,58 | 0,458795275 | -0,22 | 0,836061657 |
| Rassf7   | 0,12  | 0,865600502 | -0,16 | 0,84619405  | 0,67  | 0,076696168 | 0,2   | 0,672262747 | 0,61  | 0,502234944 |
| Rassf8   | -0,08 | 0,932531737 | -0,02 | 0,990052916 | 1,02  | 0,206505714 | -0,93 | 0,306346851 | -0,82 | 0,375162254 |
| Rassf9   | 0,41  | 0,412575527 | 0,39  | 0,595287483 | -0,47 | 0,607318275 | -0,96 | 0,062821831 | 0,45  | 0,375355033 |
| Raver1   | -0,9  | 0,504621759 | -0,15 | 0,952427593 | 0,15  | 0,942037365 | 0,46  | 0,818693228 | 0,16  | 0,957289526 |
| Raver2   | -0,15 | 0,829299665 | 0,11  | 0,862088357 | 0,07  | 0,952888594 | 0,19  | 0,777533468 | 0,45  | 0,4940585   |
| Rax      | -0,18 | 0,701624105 | 0,14  | 0,855228705 | -0,24 | 0,644698879 | -0,04 | 0,947809027 | -0,36 | 0,661685878 |

|         |       |             |       |             |       |             |       |             |       |             |
|---------|-------|-------------|-------|-------------|-------|-------------|-------|-------------|-------|-------------|
| Raxos1  | 0,09  | 0,853017255 | -0,1  | 0,807295403 | 0,03  | 0,968874924 | 0,07  | 0,864951671 | -0,15 | 0,824818547 |
| Rb1     | 0,22  | 0,597519827 | 0,68  | 0,143690114 | -0,42 | 0,564288452 | 0,32  | 0,682711085 | 0,71  | 0,355561977 |
| Rb1cc1  | 0,21  | 0,611444097 | -0,12 | 0,884001567 | 0,11  | 0,925245169 | -0,2  | 0,773449759 | -0,46 | 0,498553997 |
| Rbak    | -0,1  | 0,937872516 | 0,13  | 0,926157704 | -0,05 | 0,950846671 | -0,27 | 0,778817721 | -0,25 | 0,736156509 |
| Rbakdn  | -0,23 | 0,676800971 | -0,09 | 0,929289366 | -0,04 | 0,966910505 | -0,06 | 0,899875162 | -0,02 | 0,979456872 |
| Rbbp4   | -0,42 | 0,298771977 | -0,06 | 0,938767983 | 0,74  | 0,323517263 | 0,09  | 0,91738164  | 0,02  | 0,986738356 |
| Rbbp5   | -0,37 | 0,712495614 | -0,09 | 0,921841963 | 0,35  | 0,874639384 | 1,02  | 0,645149911 | 0,76  | 0,743091876 |
| Rbbp6   | 0,63  | 0,257178091 | 0,23  | 0,599495018 | -0,49 | 0,530058988 | 0,17  | 0,764855242 | 0,48  | 0,439152501 |
| Rbbp7   | -0,48 | 0,273887426 | -0,33 | 0,631908313 | 0,71  | 0,162772137 | 0,23  | 0,534285767 | -0,02 | 0,979456872 |
| Rbbp8   | 0,49  | 0,302722803 | -0,19 | 0,738952344 | -0,06 | 0,944441051 | 0,8   | 0,138203421 | 0,03  | 0,976743304 |
| Rbbp8nl | 0,06  | 0,949236157 | -0,26 | 0,751704055 | -0,52 | 0,457740325 | -0,05 | 0,967866794 | 0,24  | 0,86809582  |
| Rbbp9   | -0,17 | 0,886725624 | -0,22 | 0,837035571 | -0,51 | 0,565711825 | -0,32 | 0,799669326 | -0,03 | 0,984125319 |
| Rbck1   | -0,45 | 0,376151377 | 0,21  | 0,729880381 | -0,35 | 0,622546805 | -0,86 | 0,105547956 | -0,37 | 0,535370203 |
| Rbfa    | -0,51 | 0,242076986 | -0,03 | 0,981906101 | 0,16  | 0,885042765 | -0,32 | 0,575492019 | -0,32 | 0,597080822 |
| Rbfox1  | 0,12  | 0,834886413 | -0,19 | 0,728434379 | -0,18 | 0,755588608 | -0,02 | 0,978172308 | -0,24 | 0,742636733 |
| Rbfox2  | -0,53 | 0,175830295 | 0,05  | 0,961709816 | 0,27  | 0,715497532 | 0,28  | 0,542921788 | 0,22  | 0,735152891 |
| Rbfox3  | -0,15 | 0,81630789  | -0,15 | 0,828524523 | -0,11 | 0,914986329 | 0,11  | 0,820745707 | -0,29 | 0,619419535 |
| Rbks    | 0,87  | 0,317205194 | 0,95  | 0,405773884 | -0,65 | 0,121626546 | 0,31  | 0,710855553 | 0,49  | 0,383190821 |
| Rbl1    | -0,2  | 0,854564022 | 0,61  | 0,323278688 | -0,34 | 0,734556263 | 0,11  | 0,926601369 | 1,81  | 0,032750472 |
| Rbl2    | -0,09 | 0,913546177 | -0,41 | 0,557000864 | -0,5  | 0,177419831 | -0,89 | 0,128566603 | -0,49 | 0,432392624 |
| Rbm10   | -0,31 | 0,593540946 | -0,12 | 0,869801707 | 0,18  | 0,792886254 | 0,29  | 0,543475623 | -0,37 | 0,566248044 |
| Rbm11   | 0,17  | 0,814334273 | -0,24 | 0,739345787 | -0,47 | 0,321560439 | -0,63 | 0,490176405 | 0,1   | 0,944318268 |
| Rbm12   | -0,41 | 0,464460918 | 0,34  | 0,573379436 | 0,76  | 0,307848353 | 0,07  | 0,899003207 | 0,1   | 0,890297784 |
| Rbm12b1 | 0,17  | 0,915624801 | 0,82  | 0,229666828 | -0,4  | 0,69871815  | -0,99 | 0,146784762 | 0,26  | 0,648445078 |
| Rbm12b2 | 0,38  | 0,566525307 | 0,2   | 0,674709201 | -0,17 | 0,786933951 | -0,51 | 0,464594099 | 0,36  | 0,697226565 |
| Rbm14   | -0,46 | 0,577098606 | -0,55 | 0,484006822 | 0,22  | 0,816883729 | 0,94  | 0,177569419 | -0,01 | 0,9939542   |
| Rbm15   | 0,01  | 0,981669483 | 0,01  | 0,9860901   | 0,28  | 0,617592492 | 0,01  | 0,979126567 | 0,27  | 0,643580968 |
| Rbm15b  | -0,12 | 0,874049312 | 0,14  | 0,766425161 | 0,87  | 0,280780716 | 0,06  | 0,925503932 | -0,04 | 0,969617491 |
| Rbm17   | -0,01 | 0,995122815 | 0,02  | 0,985172298 | 0,09  | 0,926633738 | 0,43  | 0,331388167 | -0,23 | 0,697626937 |
| Rbm18   | 0,02  | 0,98600909  | 0,57  | 0,181283332 | 0,06  | 0,930223445 | -0,23 | 0,517354168 | 0,18  | 0,777561251 |
| Rbm19   | -0,13 | 0,869565514 | -0,29 | 0,695689103 | 0,8   | 0,320344505 | 0,63  | 0,331328372 | 0,56  | 0,428781986 |
| Rbm20   | 0,21  | 0,844104386 | -0,53 | 0,581950526 | -0,56 | 0,297280818 | 0,28  | 0,642906557 | 0,24  | 0,735052158 |
| Rbm22   | -0,29 | 0,715610155 | -0,16 | 0,894557207 | 0,24  | 0,709885771 | 0,3   | 0,503608662 | -0,58 | 0,333311901 |
| Rbm24   | -0,23 | 0,771252343 | 0,66  | 0,261025347 | -0,15 | 0,86101526  | -0,38 | 0,599633602 | -0,37 | 0,534432231 |
| Rbm25   | 0,08  | 0,886725624 | -0,01 | 0,986637545 | -0,09 | 0,888101179 | 0,28  | 0,425337107 | 0,37  | 0,476763678 |

|         |       |             |       |             |       |             |       |             |       |             |
|---------|-------|-------------|-------|-------------|-------|-------------|-------|-------------|-------|-------------|
| Rbm26   | 0,27  | 0,683531628 | 0,42  | 0,475636582 | 0,21  | 0,729031049 | -0,24 | 0,762642659 | 0,69  | 0,304131484 |
| Rbm27   | 0,37  | 0,38239969  | 0,28  | 0,625784044 | 0,23  | 0,753966565 | -0,06 | 0,886806548 | 0,21  | 0,711637936 |
| Rbm28   | 0,06  | 0,937251448 | -0,4  | 0,531718087 | -0,11 | 0,889371168 | 0,6   | 0,232695925 | 0,04  | 0,976743304 |
| Rbm3    | -0,68 | 0,082132902 | 0,25  | 0,803207823 | 0,84  | 0,10424513  | 0,53  | 0,21914454  | 0,49  | 0,354557431 |
| Rbm33   | 0,05  | 0,932110766 | -0,02 | 0,986013411 | -0,09 | 0,921956183 | 0,18  | 0,648071568 | 0,2   | 0,726042963 |
| Rbm34   | 0,23  | 0,706900702 | 0,26  | 0,732044571 | 0,42  | 0,772008734 | 0,3   | 0,613504839 | -0,11 | 0,945776926 |
| Rbm38   | -0,01 | 0,991919022 | 0,52  | 0,556926763 | 0,22  | 0,890415505 | -0,2  | 0,741765786 | 0,37  | 0,525018839 |
| Rbm39   | 0,11  | 0,841140165 | 0,3   | 0,58591598  | -0,28 | 0,569097406 | -0,27 | 0,500587813 | 0,27  | 0,588685273 |
| Rbm3os  | -0,51 | 0,62872508  | 0,54  | 0,751382934 | -0,15 | 0,962519999 | -0,48 | 0,69151142  | 0,73  | 0,638304287 |
| Rbm41   | 0,29  | 0,762779207 | 0,62  | 0,416922779 | 0,36  | 0,657277431 | -0,3  | 0,373166026 | -0,05 | 0,946463658 |
| Rbm42   | -0,31 | 0,464604854 | -0,14 | 0,803870841 | 0,17  | 0,738241106 | 0,12  | 0,736251815 | -0,11 | 0,881968395 |
| Rbm43   | -0,06 | 0,962810563 | -0,02 | 0,97834316  | 0,13  | 0,904057901 | 0,05  | 0,92123654  | 0,79  | 0,149951093 |
| Rbm44   | 0,52  | 0,691942071 | -0,48 | 0,718810401 | -0,19 | 0,895819764 | 0,62  | 0,526112145 | 0,54  | 0,554986759 |
| Rbm45   | -0,33 | 0,783200207 | -0,35 | 0,692189927 | 0,1   | 0,914134206 | 0,73  | 0,39535304  | 0,6   | 0,54440613  |
| Rbm46   | 0,13  | 0,837143506 | 0,1   | 0,973459105 | -0,05 | 0,951601163 | -0,1  | 0,884326814 | 0,01  | 0,988439807 |
| Rbm46os | 0,27  | 0,681371768 | 0,11  | 0,838684509 | -0,14 | 0,870263371 | 0,03  | 0,944714667 | -0,42 | 0,568291477 |
| Rbm47   | 0,39  | 0,74672311  | 0,44  | 0,750052986 | 1,03  | 0,341648319 | -0,16 | 0,927360713 | 0,59  | 0,597807522 |
| Rbm48   | -0,2  | 0,785966909 | -0,01 | 0,998237793 | 0,19  | 0,736422567 | -1,17 | 0,045013657 | -0,12 | 0,893439982 |
| Rbm4b   | 0,18  | 0,90742841  | 0,36  | 0,501438027 | 0,22  | 0,869952072 | -0,39 | 0,535627157 | 0,38  | 0,69063878  |
| Rbm5    | 0,24  | 0,565823399 | 0,18  | 0,807175471 | -0,06 | 0,941718633 | -0,66 | 0,172652422 | -0,18 | 0,792404969 |
| Rbm6    | 0,15  | 0,778018446 | -0,22 | 0,621112051 | 0     | 0,999931921 | 0     | 0,996900471 | 0,24  | 0,697818445 |
| Rbm7    | 0,02  | 0,98225675  | 0,05  | 0,912535732 | -0,04 | 0,959862254 | 0,22  | 0,604127556 | 0,33  | 0,54339259  |
| Rbm8a   | 0     | 0,996998625 | -0,11 | 0,809683705 | 0,19  | 0,71593256  | -0,06 | 0,893958719 | 0,26  | 0,720844381 |
| Rbm8a2  | 0,14  | 0,708266713 | 0,1   | 0,817367084 | 0,04  | 0,957114647 | 0,01  | 0,987247308 | 0,16  | 0,791708307 |
| Rbms1   | 0,21  | 0,626534172 | 0,32  | 0,473553589 | -0,13 | 0,832155972 | -0,39 | 0,302214149 | 0,52  | 0,269698104 |
| Rbms2   | 0,08  | 0,874997961 | 0,06  | 0,914205626 | 0,26  | 0,700975611 | -0,25 | 0,426547706 | 0,03  | 0,973428839 |
| Rbms3   | -0,78 | 0,374791147 | -0,36 | 0,700928109 | 0,21  | 0,80546411  | -0,07 | 0,94835703  | 0,15  | 0,887154982 |
| Rbmx    | -0,55 | 0,369418071 | -0,34 | 0,622161495 | -0,21 | 0,717856288 | -0,62 | 0,494062739 | 0,2   | 0,879075155 |
| Rbmx2   | -0,08 | 0,940281494 | -0,11 | 0,85597055  | 0,42  | 0,418499889 | 0,45  | 0,720870706 | 0,13  | 0,940774655 |
| Rbmx11  | -0,28 | 0,673568684 | -0,08 | 0,926157704 | 0,94  | 0,280958182 | 0,93  | 0,182595927 | 0,08  | 0,944930054 |
| Rbmx12  | 0,25  | 0,736503749 | -0,21 | 0,680709276 | -0,08 | 0,913943534 | 0,1   | 0,850749612 | -0,42 | 0,490247948 |
| Rbmy    | -0,34 | 0,428912147 | -0,24 | 0,589733014 | -0,27 | 0,643853175 | -0,07 | 0,906950833 | 0,21  | 0,788112596 |
| Rbp1    | -1,04 | 0,208083039 | -0,78 | 0,141157706 | 1,28  | 0,03244077  | 2,03  | 0,005240816 | -0,58 | 0,214056891 |
| Rbp2    | -0,83 | 0,233235566 | -0,75 | 0,212039473 | 1,13  | 0,199920573 | 0,52  | 0,158652582 | 0,21  | 0,860591136 |
| Rbp3    | 0,19  | 0,640414995 | -0,05 | 0,948409105 | 0,16  | 0,797422121 | 0,26  | 0,560379928 | 0,08  | 0,921989133 |

|        |       |             |       |             |       |             |       |             |       |             |
|--------|-------|-------------|-------|-------------|-------|-------------|-------|-------------|-------|-------------|
| Rbp4   | 0,11  | 0,9124306   | 0,51  | 0,487477927 | -0,26 | 0,684455958 | 0,03  | 0,972244785 | -0,02 | 0,990846056 |
| Rbp7   | -0,98 | 0,303932151 | -1,83 | 0,388798938 | -0,29 | 0,882595564 | 0,56  | 0,313562807 | -2,37 | 0,009178622 |
| Rbpj   | 0,07  | 0,895585982 | 0,02  | 0,973782672 | -0,11 | 0,864922665 | -0,03 | 0,967866794 | 0,34  | 0,630504264 |
| Rbpjl  | -0,06 | 0,931872282 | -0,19 | 0,852891507 | 0,03  | 0,973732268 | 0,26  | 0,761678668 | 0,31  | 0,729027002 |
| Rbpms  | 0,11  | 0,809762393 | 0,03  | 0,95794747  | 0,02  | 0,987003605 | 0,35  | 0,250065242 | 0,06  | 0,949140184 |
| Rbpms2 | -0,02 | 0,983516046 | -0,09 | 0,837500541 | 0,36  | 0,730738549 | 0,41  | 0,400176197 | -0,05 | 0,973943141 |
| Rbsn   | -0,18 | 0,845794148 | 0,1   | 0,900801202 | -0,13 | 0,922318683 | 0,09  | 0,932633294 | -0,43 | 0,646672171 |
| Rbx1   | 0,02  | 0,965320014 | 0     | 0,999438768 | 0,25  | 0,683975246 | -0,12 | 0,77073646  | -0,04 | 0,957289526 |
| Rc3h1  | -0,11 | 0,84900712  | -0,12 | 0,809683705 | 0,18  | 0,791940256 | 0,08  | 0,853091313 | -0,01 | 0,991980521 |
| Rc3h2  | 0,08  | 0,916919396 | 0,02  | 0,981758111 | 0,12  | 0,876989625 | 0,27  | 0,530766711 | 0,1   | 0,912250982 |
| Rcan1  | 0,45  | 0,441517592 | 0,36  | 0,336433977 | -0,25 | 0,680127367 | 0,34  | 0,267147508 | -0,19 | 0,841160223 |
| Rcan2  | -0,06 | 0,948926586 | -0,29 | 0,843162191 | 0,05  | 0,972942432 | -1,65 | 0,058105959 | -1,11 | 0,104257693 |
| Rcan3  | -0,77 | 0,143553216 | -0,67 | 0,244905942 | 0,31  | 0,595395621 | 0,5   | 0,336063856 | -0,63 | 0,307816931 |
| Rcbtb1 | 0,04  | 0,94881239  | 0,29  | 0,786394409 | 0,49  | 0,570743031 | -0,15 | 0,867809029 | 0,34  | 0,726042963 |
| Rcbtb2 | -0,47 | 0,453318919 | 0,12  | 0,88928164  | 0,31  | 0,800107725 | 0,29  | 0,464815834 | 0,31  | 0,612920986 |
| Rcc1   | -0,6  | 0,446074179 | -0,8  | 0,326075089 | 0,1   | 0,949489888 | 1,43  | 0,022167784 | 0,61  | 0,167381225 |
| Rcc2   | -0,25 | 0,55640978  | -0,2  | 0,797654162 | 0,43  | 0,473593056 | 0,87  | 0,205895339 | 0,22  | 0,836061657 |
| Rccd1  | -0,29 | 0,445462269 | 0,13  | 0,90781211  | 0,01  | 0,993379272 | 0,71  | 0,127727227 | 0,1   | 0,93417442  |
| Rce1   | 0,35  | 0,494787323 | -0,08 | 0,867265251 | 0,16  | 0,853276446 | 0,39  | 0,767425289 | 0,22  | 0,910249438 |
| Rchy1  | 0,2   | 0,755833613 | 0,27  | 0,490814009 | -0,32 | 0,720069267 | 0,14  | 0,731743856 | 0,21  | 0,794001669 |
| Rcl1   | -0,35 | 0,652819827 | -0,38 | 0,615058004 | -0,51 | 0,598378377 | 1,68  | 0,074454367 | 1,69  | 0,113935413 |
| Rcn1   | -0,35 | 0,59648949  | 0,62  | 0,465764098 | -0,2  | 0,823250383 | 0,99  | 0,142375488 | 0,92  | 0,322519045 |
| Rcn2   | -0,05 | 0,969232059 | 0,26  | 0,677000136 | -0,21 | 0,859298431 | -0,3  | 0,545672272 | 0,16  | 0,826379382 |
| Rcn3   | -0,75 | 0,416909288 | -0,91 | 0,286908359 | 0,1   | 0,917981605 | -0,55 | 0,327054708 | -0,85 | 0,077639075 |
| Rcor1  | 0,07  | 0,889776123 | 0,14  | 0,826290896 | 0,65  | 0,130256376 | 0,39  | 0,469212922 | 0,18  | 0,808914063 |
| Rcor2  | -0,56 | 0,553475647 | -0,63 | 0,182771552 | 0,91  | 0,158982279 | -0,05 | 0,963897766 | -0,79 | 0,403093945 |
| Rcor3  | -0,02 | 0,984183188 | -0,02 | 0,985413376 | -0,04 | 0,974628464 | -0,7  | 0,078439734 | -0,17 | 0,847312006 |
| Rcsd1  | -0,75 | 0,14232546  | -0,72 | 0,579053234 | 0,24  | 0,832155972 | -1,05 | 0,047566843 | -0,36 | 0,521069462 |
| Rcvrn  | -0,41 | 0,54514459  | 0,14  | 0,855632384 | 0,14  | 0,870377336 | -0,6  | 0,351707132 | -0,55 | 0,469148703 |
| Rd3    | 0,07  | 0,9124306   | -0,25 | 0,732847182 | -0,07 | 0,940489823 | -0,34 | 0,528759846 | -0,03 | 0,981677577 |
| Rd3l   | -0,05 | 0,928103232 | -0,22 | 0,586775333 | -0,19 | 0,899144679 | 0,13  | 0,80795564  | -0,08 | 0,952190189 |
| Rdh1   | -0,09 | 0,876019664 | 0,18  | 0,842663656 | 0,05  | 0,964851619 | -0,19 | 0,835337564 | 0,31  | 0,809134979 |
| Rdh10  | -0,05 | 0,949868652 | 0,21  | 0,771585153 | 0,82  | 0,242790302 | -0,14 | 0,848789702 | -0,25 | 0,756307058 |
| Rdh11  | -0,58 | 0,296031134 | -0,01 | 0,999210601 | 0,62  | 0,598179126 | 0,09  | 0,963676043 | 0,18  | 0,929780699 |
| Rdh12  | -0,45 | 0,795481466 | -0,28 | 0,666450149 | 0,6   | 0,666305832 | 0,96  | 0,327891881 | -0,04 | 0,974553568 |

|          |       |             |       |             |       |             |       |             |       |             |
|----------|-------|-------------|-------|-------------|-------|-------------|-------|-------------|-------|-------------|
| Rdh13    | 0,03  | 0,965468545 | -0,11 | 0,912535732 | 0,35  | 0,62535327  | -0,35 | 0,279653873 | -0,55 | 0,433940975 |
| Rdh14    | -0,26 | 0,683444889 | 0,03  | 0,975026194 | 0,05  | 0,950076566 | -0,36 | 0,395636348 | -0,23 | 0,72393858  |
| Rdh16    | 0,15  | 0,778678404 | 0,18  | 0,763796207 | -0,17 | 0,798786676 | 0,02  | 0,981610833 | 0,12  | 0,92519473  |
| Rdh18-ps | 0,3   | 0,600120467 | 0,11  | 0,891749049 | 0,01  | 0,993379272 | -0,07 | 0,907485612 | 0,04  | 0,961303869 |
| Rdh19    | 0,32  | 0,553127947 | 0,3   | 0,693906911 | -0,55 | 0,326707568 | 0,04  | 0,932315462 | -0,18 | 0,836715889 |
| Rdh5     | -0,01 | 0,99456044  | 0,25  | 0,74031644  | -0,61 | 0,520763362 | 0,15  | 0,874904932 | -0,2  | 0,792346596 |
| Rdh7     | 0,18  | 0,814334273 | -0,3  | 0,643102783 | -0,33 | 0,707662594 | 0,23  | 0,63103158  | 0,23  | 0,739851808 |
| Rdh8     | 0,13  | 0,858748956 | -0,17 | 0,713942504 | -0,09 | 0,904132011 | 0,18  | 0,604605926 | 0,11  | 0,881968395 |
| Rdh9     | 0,41  | 0,501682835 | -0,08 | 0,958663163 | -0,09 | 0,928796719 | -0,16 | 0,689594535 | -0,03 | 0,979456872 |
| Rdm1     | -0,55 | 0,641357042 | -0,03 | 0,952352299 | 0,87  | 0,329372899 | -1,16 | 0,130959725 | -0,28 | 0,807725933 |
| Rdx      | 0,27  | 0,680520303 | 0,55  | 0,335724646 | -0,2  | 0,731606116 | -1,24 | 0,062430624 | 0,41  | 0,530072156 |
| Rec114   | -0,49 | 0,504621759 | -0,46 | 0,615311543 | -0,17 | 0,840915336 | 0,44  | 0,402472168 | -0,37 | 0,72187317  |
| Rec8     | 0,68  | 0,135065204 | 0,11  | 0,913777818 | -0,01 | 0,996260936 | -1,22 | 0,27230705  | -0,72 | 0,498553997 |
| Reck     | -1,05 | 0,21284035  | -0,51 | 0,674832256 | 0,27  | 0,669266652 | -3,15 | 0,02040845  | -0,92 | 0,332430866 |
| Recql    | -1,13 | 0,306829062 | -0,69 | 0,577638608 | 0,74  | 0,472273933 | -0,01 | 0,996451727 | 0,29  | 0,755576335 |
| Recql4   | -0,24 | 0,62872508  | -0,34 | 0,453052221 | 0,09  | 0,911860447 | 0,52  | 0,268857442 | -0,01 | 0,993413582 |
| Recql5   | -0,03 | 0,983516046 | 0,17  | 0,842663656 | -0,42 | 0,705811313 | -0,1  | 0,918097556 | -0,03 | 0,981913783 |
| Redrum   | 0,05  | 0,91366065  | 0,22  | 0,77325041  | -0,23 | 0,72316448  | 0,01  | 0,989926105 | 0,11  | 0,939948423 |
| Reep1    | 0,49  | 0,294290336 | -0,03 | 0,9860901   | -0,56 | 0,654355706 | -0,34 | 0,522511755 | 1,53  | 0,116694427 |
| Reep2    | -0,03 | 0,980120898 | 0,13  | 0,870958707 | 0,6   | 0,436827113 | -1,29 | 0,071713131 | -0,42 | 0,525585569 |
| Reep3    | 0,27  | 0,596187053 | 0,44  | 0,421240702 | -0,1  | 0,894018349 | -0,32 | 0,341752301 | -0,2  | 0,728388857 |
| Reep4    | -0,4  | 0,436086286 | -0,55 | 0,183422273 | 0,92  | 0,135294334 | 1,05  | 0,038911901 | -0,23 | 0,721622418 |
| Reep5    | -0,39 | 0,370606588 | -0,27 | 0,478338    | 0,31  | 0,474932301 | 0,8   | 0,219117195 | 0,03  | 0,980961333 |
| Reep6    | -0,85 | 0,25387015  | -0,28 | 0,873596394 | 0,53  | 0,508853757 | 0,16  | 0,949239972 | -0,3  | 0,890833196 |
| Reg1     | -0,07 | 0,963914207 | -0,06 | 0,932628106 | -0,16 | 0,846975965 | -0,68 | 0,129101197 | -0,13 | 0,884104506 |
| Reg2     | -0,68 | 0,212091984 | -0,28 | 0,719281503 | 0,06  | 0,94191438  | 0,96  | 0,066910258 | 0,69  | 0,246316824 |
| Reg3a    | -0,01 | 0,998027251 | 0,27  | 0,763005394 | -0,3  | 0,659402734 | 0,44  | 0,729857506 | 0,09  | 0,952753183 |
| Reg3b    | 0,04  | 0,976855185 | 0,37  | 0,539700767 | 0,05  | 0,967154353 | -0,2  | 0,668172414 | -0,13 | 0,880134862 |
| Reg3d    | 0,19  | 0,800851935 | 0,03  | 0,966705367 | -0,03 | 0,976874033 | 0,28  | 0,697380385 | -0,37 | 0,697757911 |
| Reg3g    | 0,16  | 0,807062435 | -0,1  | 0,879693148 | 0,01  | 0,993379272 | -0,14 | 0,715804103 | 0,24  | 0,700875396 |
| Reg4     | 0,19  | 0,818386872 | -0,48 | 0,666450149 | -0,52 | 0,208217794 | 0,55  | 0,523982994 | -0,37 | 0,752420653 |
| Rel      | 0,17  | 0,735596307 | 0,21  | 0,785573503 | 0,32  | 0,702149525 | 0,33  | 0,671923745 | 0,07  | 0,957644416 |
| Rela     | 0,22  | 0,565453765 | 0,34  | 0,568282579 | 0,11  | 0,890473147 | -0,14 | 0,736423588 | 0,29  | 0,616680786 |
| Relb     | -0,06 | 0,944991778 | 0,3   | 0,705532323 | -0,19 | 0,774337646 | 0,16  | 0,802787784 | 0,26  | 0,726042963 |
| Rell1    | -0,07 | 0,916792859 | 0,19  | 0,643353853 | -0,17 | 0,840836808 | 0,85  | 0,107563158 | 0,58  | 0,321759988 |

|        |       |             |       |             |       |             |       |             |       |             |
|--------|-------|-------------|-------|-------------|-------|-------------|-------|-------------|-------|-------------|
| Rel2   | 0,21  | 0,697700709 | -0,15 | 0,867265251 | 0,08  | 0,922318683 | 0,05  | 0,968211182 | 0     | 0,995918051 |
| Reln   | -0,18 | 0,889776123 | -0,04 | 0,982137548 | -0,75 | 0,321784919 | -2,66 | 0,017791354 | -0,87 | 0,278469701 |
| Relt   | -0,1  | 0,909167171 | 0,03  | 0,978741224 | 0,37  | 0,6348675   | 0,2   | 0,747440364 | -0,14 | 0,913978885 |
| Rem1   | -0,43 | 0,405489454 | -0,04 | 0,977204386 | 0,32  | 0,809137779 | -1,31 | 0,03032597  | -0,88 | 0,337492586 |
| Rem2   | -0,09 | 0,931976704 | 0,54  | 0,747360238 | 0,08  | 0,950846671 | 0,74  | 0,393059382 | -0,07 | 0,974553568 |
| Ren1   | 0,38  | 0,511005771 | 0,19  | 0,894571363 | 0,19  | 0,847506224 | -2,85 | 0,174219259 | -2,06 | 0,340734388 |
| Renbp  | 0,69  | 0,317670222 | 0,04  | 0,972706967 | -0,15 | 0,83442082  | -0,65 | 0,434948547 | -0,18 | 0,905581898 |
| Rep15  | 0,27  | 0,797024882 | -0,27 | 0,729172466 | 0,64  | 0,35431494  | 1,45  | 0,336356061 | 0,51  | 0,783532561 |
| Repin1 | -0,89 | 0,227753128 | 0,14  | 0,880473303 | -0,57 | 0,13265466  | -0,67 | 0,299499224 | -0,34 | 0,651895091 |
| Reps1  | 0,19  | 0,722262013 | 0,02  | 0,986534184 | 0     | 0,999240886 | 0,15  | 0,76240803  | -0,08 | 0,939765685 |
| Reps2  | -0,28 | 0,793209485 | 0,19  | 0,805949528 | 0,16  | 0,876684089 | -0,56 | 0,492206709 | -0,17 | 0,892045103 |
| Rer1   | 0,25  | 0,567790521 | 0,24  | 0,783677427 | -0,04 | 0,964509282 | 0,12  | 0,848930763 | 0,39  | 0,430670474 |
| Rere   | 0,43  | 0,351381228 | 0,26  | 0,599008089 | -0,15 | 0,812319246 | -0,79 | 0,074454367 | -0,28 | 0,610295976 |
| Rerg   | -0,07 | 0,911158473 | 0,14  | 0,866281408 | -0,08 | 0,920158784 | -1,41 | 0,044866965 | -0,44 | 0,715879151 |
| Rergl  | 0,02  | 0,988908814 | -0,35 | 0,633533351 | -0,08 | 0,928065911 | -2,27 | 0,040357629 | -0,34 | 0,729208209 |
| Resp18 | 0,31  | 0,738714467 | -0,28 | 0,912773944 | 0,02  | 0,990836784 | -0,44 | 0,559746703 | -0,18 | 0,907903208 |
| Rest   | 0,16  | 0,733667688 | -0,06 | 0,973043968 | -0,02 | 0,988891194 | 0,62  | 0,123281432 | 0,1   | 0,885872093 |
| Ret    | -0,76 | 0,264306278 | -1,21 | 0,377659975 | 0,58  | 0,386629879 | 0,23  | 0,771160643 | -0,63 | 0,444327869 |
| Retn   | 0,15  | 0,794604997 | -0,17 | 0,804576975 | -0,51 | 0,420043356 | -0,51 | 0,474113119 | -0,94 | 0,201664516 |
| Retnla | -0,29 | 0,601664468 | 0,3   | 0,568725484 | 0,25  | 0,66678261  | -0,28 | 0,496999424 | -0,05 | 0,969228401 |
| Retnlb | 0,37  | 0,479545376 | 0     | 1           | -0,1  | 0,927950027 | 0,04  | 0,964692144 | 0,06  | 0,954048928 |
| Retnlg | 0,63  | 0,314465089 | 0,86  | 0,147949735 | 0,05  | 0,994420875 | -0,93 | 0,307420592 | -0,01 | 0,995109577 |
| Retsat | -0,31 | 0,55061224  | 0,09  | 0,945143056 | 0,28  | 0,707539555 | -0,8  | 0,2423686   | -0,2  | 0,766703448 |
| Rev1   | -0,23 | 0,597519827 | 0,01  | 0,992407207 | 0,81  | 0,132478136 | -0,39 | 0,431967511 | 0,12  | 0,883592868 |
| Rev3l  | -0,19 | 0,731184324 | 0,13  | 0,802979985 | 0,26  | 0,729031049 | 0,51  | 0,393038798 | 0,52  | 0,501644357 |
| Rex2   | 0,19  | 0,722415783 | -0,16 | 0,898256272 | -0,18 | 0,880367197 | 0,17  | 0,865094556 | -0,12 | 0,932111028 |
| Rexo1  | 0,03  | 0,976808481 | 0,06  | 0,976423495 | -0,39 | 0,428556311 | -0,1  | 0,901657672 | 0,07  | 0,940438527 |
| Rexo2  | -0,42 | 0,369418071 | -0,46 | 0,300832923 | 0,78  | 0,337509636 | 0,59  | 0,111487533 | -0,16 | 0,825966687 |
| Rexo4  | 0,04  | 0,970463755 | 0,25  | 0,576723643 | -0,16 | 0,831214914 | 0,31  | 0,589132295 | 0,29  | 0,763240477 |
| Rfc1   | -0,2  | 0,767540671 | -0,56 | 0,599280812 | 0,64  | 0,337607494 | -0,54 | 0,242363894 | -0,09 | 0,937768599 |
| Rfc2   | -0,22 | 0,730710327 | -0,52 | 0,494445434 | 0,69  | 0,329525512 | 0,25  | 0,589510349 | -0,41 | 0,46391899  |
| Rfc3   | 0,81  | 0,074890017 | 0,06  | 0,959685428 | 0,93  | 0,369400619 | 1,01  | 0,066945702 | -0,08 | 0,915395762 |
| Rfc4   | -0,82 | 0,491640406 | -1,21 | 0,126890128 | 1,03  | 0,342915451 | 0,86  | 0,418849726 | 0,18  | 0,913553402 |
| Rfc5   | -0,84 | 0,513822814 | -1,03 | 0,179411793 | 0,98  | 0,259550802 | 1,19  | 0,043612554 | 0,29  | 0,697757911 |
| Rfescd | -0,05 | 0,969577981 | -0,19 | 0,824372931 | -0,42 | 0,681398968 | -0,26 | 0,555564163 | -0,19 | 0,865258929 |

|        |       |             |       |             |       |             |       |             |       |             |
|--------|-------|-------------|-------|-------------|-------|-------------|-------|-------------|-------|-------------|
| Rffl   | 0,02  | 0,969486005 | -0,04 | 0,936792848 | 0,15  | 0,898935616 | -0,28 | 0,544065896 | -0,33 | 0,594534591 |
| Rfk    | -0,44 | 0,353358961 | -0,4  | 0,504611381 | -0,21 | 0,791940256 | -1,23 | 0,014783459 | -0,57 | 0,176186731 |
| Rfng   | -0,49 | 0,583634546 | 0,04  | 0,965747015 | 0,19  | 0,86935713  | -0,24 | 0,696843539 | -0,49 | 0,520032526 |
| Rfpl4  | 0,02  | 0,983516046 | -0,28 | 0,621035103 | -0,48 | 0,412427594 | 0,29  | 0,530656838 | 0,17  | 0,840952901 |
| Rfpl4b | 0,31  | 0,527354429 | 0,1   | 0,841007084 | 0,19  | 0,709317317 | 0,06  | 0,911213081 | -0,12 | 0,900126162 |
| Rft1   | -0,27 | 0,753974253 | -0,42 | 0,656542439 | -0,28 | 0,846795397 | 0,49  | 0,581261175 | -0,08 | 0,97206128  |
| Rftn1  | 0,36  | 0,640002115 | 0,32  | 0,649397617 | -0,33 | 0,70130819  | 0,02  | 0,97507484  | 0,01  | 0,98653183  |
| Rftn2  | -1,07 | 0,156158686 | -0,6  | 0,582502577 | 0,06  | 0,966297296 | 0,7   | 0,261651615 | -0,25 | 0,841160223 |
| Rfwd2  | 0,19  | 0,803337362 | -0,34 | 0,70516978  | 0,16  | 0,871603067 | 0,89  | 0,105212683 | 0,41  | 0,520663339 |
| Rfwd3  | -0,61 | 0,318302988 | -0,15 | 0,910595744 | 0,78  | 0,187061255 | 0,47  | 0,501971846 | -0,34 | 0,634425115 |
| Rfx1   | 0,04  | 0,969542529 | -0,03 | 0,981545523 | 0,23  | 0,628978443 | -0,03 | 0,961963439 | -0,23 | 0,694503201 |
| Rfx2   | -0,3  | 0,727440635 | -0,16 | 0,849511429 | 0,46  | 0,596163134 | -0,72 | 0,110770334 | -0,79 | 0,352110675 |
| Rfx3   | -0,09 | 0,962030279 | -0,57 | 0,411059412 | 0,12  | 0,948552385 | -0,14 | 0,861140391 | -0,36 | 0,64484547  |
| Rfx4   | 0     | 0,999700495 | 0,31  | 0,639698557 | -0,1  | 0,93262999  | 0,12  | 0,882892693 | -0,05 | 0,961406182 |
| Rfx5   | 0,12  | 0,931241547 | 0,17  | 0,896065393 | -0,25 | 0,87734396  | 0,11  | 0,932800758 | 1,01  | 0,312830548 |
| Rfx6   | 0     | 0,998769353 | 0,16  | 0,804576975 | -0,05 | 0,967930981 | 0,21  | 0,634922681 | 0,44  | 0,416261794 |
| Rfx7   | -0,16 | 0,882943798 | 0,07  | 0,926089537 | 0,62  | 0,556562789 | 0,39  | 0,781338312 | 0,42  | 0,766559546 |
| Rfx8   | -0,16 | 0,821267687 | 0,46  | 0,735554037 | -0,09 | 0,926183194 | 0,23  | 0,739831108 | 0,2   | 0,802027955 |
| Rfxank | 0,08  | 0,921060011 | 0,29  | 0,51825831  | 0,59  | 0,290683712 | -0,61 | 0,146784762 | -0,05 | 0,957046874 |
| Rfxap  | 0,15  | 0,825389612 | 0,22  | 0,781564224 | -0,27 | 0,776126065 | 0,42  | 0,603471344 | -0,4  | 0,545166604 |
| Rgag1  | -0,01 | 0,991620185 | -0,61 | 0,333686271 | -0,37 | 0,340935136 | 0,27  | 0,517018146 | 0,1   | 0,951223734 |
| Rgag4  | 0,31  | 0,421029929 | -0,18 | 0,747707816 | 0,07  | 0,916403684 | -0,34 | 0,499564387 | -0,27 | 0,77684009  |
| Rgcc   | 0,51  | 0,425285092 | 0,51  | 0,323278688 | -0,3  | 0,742758388 | -1,35 | 0,063363265 | -0,88 | 0,12769369  |
| Rgl1   | -0,1  | 0,816710776 | 0,03  | 0,96095671  | 0,2   | 0,763358003 | -0,36 | 0,309326349 | -0,26 | 0,673577848 |
| Rgl2   | -0,4  | 0,378598836 | -0,19 | 0,728434379 | -0,36 | 0,481504499 | 0,09  | 0,87630843  | -0,63 | 0,225054281 |
| Rgl3   | -0,47 | 0,682574629 | -0,68 | 0,317755212 | 0,34  | 0,639863173 | -0,4  | 0,379392822 | -0,35 | 0,655956123 |
| Rgma   | -0,11 | 0,808947569 | -0,27 | 0,786394409 | 0,11  | 0,910766724 | -0,13 | 0,777673386 | -0,28 | 0,68987325  |
| Rgmb   | 0,31  | 0,508688727 | 0,61  | 0,418418761 | 0,1   | 0,940335002 | -0,61 | 0,207752764 | 0,09  | 0,927807084 |
| Rgn    | 0,09  | 0,865381242 | -0,37 | 0,466578357 | 0,22  | 0,770526999 | 0,18  | 0,646776742 | 0,37  | 0,766559546 |
| Rgp1   | -0,25 | 0,758636946 | 0,09  | 0,933941404 | 0     | 0,998996411 | -0,24 | 0,565906862 | -0,73 | 0,208358497 |
| Rgr    | -0,1  | 0,845794148 | -0,07 | 0,927323556 | -0,14 | 0,867543859 | -0,13 | 0,79020758  | -0,02 | 0,984125319 |
| Rgs1   | 0,03  | 0,974744119 | -0,19 | 0,917223247 | -1,1  | 0,545465016 | -1,49 | 0,124552073 | 0,27  | 0,916173996 |
| Rgs10  | -0,19 | 0,714188574 | -0,21 | 0,896065393 | 0,76  | 0,263132726 | 0,26  | 0,673131686 | -0,21 | 0,821140509 |
| Rgs11  | 0,02  | 0,983563899 | -0,01 | 0,987357454 | 0,02  | 0,989772079 | 0,03  | 0,96366591  | -0,31 | 0,59741971  |
| Rgs12  | -0,13 | 0,878236686 | 0,07  | 0,958545812 | -0,47 | 0,476821653 | -0,31 | 0,649870947 | 0,44  | 0,525018839 |



|        |       |             |       |             |       |             |       |             |       |             |
|--------|-------|-------------|-------|-------------|-------|-------------|-------|-------------|-------|-------------|
| Rgs13  | 0,21  | 0,686885915 | 0,29  | 0,631534856 | 0,1   | 0,868451584 | 0,14  | 0,72503205  | 0,19  | 0,800540569 |
| Rgs14  | -0,21 | 0,762042842 | 0,37  | 0,630975718 | -0,05 | 0,973802765 | 0,67  | 0,18458304  | 0,08  | 0,942990206 |
| Rgs16  | -0,76 | 0,060731662 | 0,19  | 0,644516897 | 0,34  | 0,503650142 | 0,3   | 0,45691565  | 0,57  | 0,312830548 |
| Rgs17  | 0,36  | 0,548094483 | 0,22  | 0,874448335 | -0,09 | 0,949135765 | -0,45 | 0,523255995 | -0,09 | 0,952971656 |
| Rgs18  | 0,47  | 0,652819827 | 0,72  | 0,436251163 | -0,03 | 0,989772079 | 0,3   | 0,860917191 | -0,01 | 0,994116818 |
| Rgs19  | -0,47 | 0,239601221 | -0,09 | 0,839673299 | 0,21  | 0,786838878 | 0,96  | 0,116267286 | 0,08  | 0,944229706 |
| Rgs2   | 0,06  | 0,96890386  | 0,15  | 0,928974649 | -0,35 | 0,808747196 | -2,55 | 0,016043404 | -0,45 | 0,471190608 |
| Rgs20  | 0,25  | 0,746728273 | -0,07 | 0,967338233 | -0,44 | 0,551995502 | 0,08  | 0,950860651 | 0,2   | 0,893117638 |
| Rgs21  | 0,59  | 0,149941264 | -0,27 | 0,731797216 | -0,15 | 0,807926482 | -0,08 | 0,874904932 | 0,01  | 0,991628025 |
| Rgs22  | -0,23 | 0,778869381 | 0,35  | 0,804868131 | 0,02  | 0,989491273 | -0,44 | 0,638148039 | 0,2   | 0,832848337 |
| Rgs3   | -0,48 | 0,269264884 | -0,28 | 0,605851161 | 0,43  | 0,478503279 | -0,22 | 0,746580621 | -0,4  | 0,554975763 |
| Rgs4   | -0,26 | 0,862124608 | 0,33  | 0,747707816 | -0,01 | 0,986406216 | -0,39 | 0,576059779 | -0,33 | 0,490988983 |
| Rgs5   | -0,34 | 0,824390658 | 0,87  | 0,641804702 | 0,22  | 0,909729307 | -2,33 | 0,121336691 | -0,49 | 0,59741971  |
| Rgs6   | -0,13 | 0,841140165 | 0,04  | 0,941811651 | -0,59 | 0,334270696 | 0,08  | 0,927714057 | 0,03  | 0,984788044 |
| Rgs7   | 0,51  | 0,231990451 | 0,06  | 0,938944149 | 0,23  | 0,723037215 | 0     | 0,999221046 | 0,6   | 0,378814275 |
| Rgs7bp | -0,3  | 0,506476054 | 0,07  | 0,934602811 | 0,15  | 0,90228001  | -2,45 | 0,012033715 | -0,63 | 0,32673984  |
| Rgs8   | 0,22  | 0,84377795  | 0,01  | 0,999395995 | -0,12 | 0,904239687 | -0,18 | 0,683774467 | -0,16 | 0,833124162 |
| Rgs9   | 0,94  | 0,134634474 | 0,66  | 0,221902756 | -0,99 | 0,093530523 | 0,92  | 0,20743874  | -0,06 | 0,969681536 |
| Rgs9bp | 0,21  | 0,639039342 | 0,2   | 0,683695236 | -0,05 | 0,968742139 | -0,29 | 0,588987424 | 0,24  | 0,680251212 |
| Rgs11  | 0,32  | 0,523556522 | 0,03  | 0,9860901   | -0,21 | 0,786933951 | -0,4  | 0,30684572  | -0,12 | 0,860591136 |
| Rhag   | 0,55  | 0,315801833 | 0     | 1           | -0,24 | 0,698662367 | 0,05  | 0,971334673 | 0,23  | 0,74324214  |
| Rhbdd1 | 0,08  | 0,948538969 | 0,47  | 0,85141132  | -1,42 | 0,077626926 | -0,45 | 0,802239788 | 0,45  | 0,723883531 |
| Rhbdd2 | -0,08 | 0,882060783 | 0,19  | 0,640619407 | 0,42  | 0,576592414 | -0,23 | 0,696837631 | -0,13 | 0,906031862 |
| Rhbdd3 | 0,3   | 0,642618049 | -0,01 | 0,994137877 | -0,21 | 0,836633803 | -0,66 | 0,191379842 | -0,47 | 0,545166604 |
| Rhbdf1 | -0,04 | 0,962711714 | 0,07  | 0,95419895  | 0,88  | 0,323989114 | -0,06 | 0,956598819 | -0,69 | 0,329071183 |
| Rhbdf2 | -0,04 | 0,968471385 | 0,15  | 0,898039508 | -0,07 | 0,933080127 | 0,09  | 0,924303497 | 0,33  | 0,616797608 |
| Rhbdl1 | 0,26  | 0,651732317 | 0,16  | 0,895009934 | -0,4  | 0,740579016 | -0,19 | 0,829087694 | -0,08 | 0,955897803 |
| Rhbdl2 | -1,19 | 0,10495459  | -0,53 | 0,473944486 | -1    | 0,390712075 | 2,61  | 0,072272835 | -0,49 | 0,765340194 |
| Rhbdl3 | 0,19  | 0,869225685 | 0,04  | 0,979002922 | -0,15 | 0,821418477 | -0,4  | 0,254404515 | -0,28 | 0,677687906 |
| Rhbg   | 0,31  | 0,660482793 | -0,39 | 0,775483469 | -0,05 | 0,955284278 | -0,08 | 0,895701762 | 0,19  | 0,791800359 |
| Rhcg   | 0,57  | 0,483376079 | -0,23 | 0,700831651 | 0,14  | 0,848684973 | 0,41  | 0,581988484 | 0,2   | 0,860877067 |
| Rhd    | 0,1   | 0,892154362 | 0,09  | 0,907552582 | -0,12 | 0,830336321 | 0,15  | 0,777827729 | 0,13  | 0,884640084 |
| Rheb   | 0,16  | 0,758721455 | 0,06  | 0,928974649 | 0,35  | 0,51127708  | 0,33  | 0,349140876 | 0,35  | 0,544938455 |
| Rhebl1 | 0,76  | 0,228902555 | -0,26 | 0,738762579 | -0,83 | 0,262233857 | -0,38 | 0,642747489 | 0,51  | 0,541709946 |
| Rhno1  | -0,55 | 0,520609641 | -0,04 | 0,993789602 | -0,2  | 0,817818413 | 1     | 0,475272978 | -0,07 | 0,980961333 |

|         |       |             |       |             |       |             |       |             |       |             |
|---------|-------|-------------|-------|-------------|-------|-------------|-------|-------------|-------|-------------|
| Rho     | -0,48 | 0,640077836 | -0,8  | 0,51825831  | 0,48  | 0,748739648 | 0,83  | 0,296855169 | -0,76 | 0,576777161 |
| Rhoa    | -0,24 | 0,519845843 | -0,15 | 0,722000016 | 0,21  | 0,724675525 | -0,07 | 0,89361444  | 0,02  | 0,979152939 |
| Rhob    | 0,04  | 0,947117278 | 0,05  | 0,930849936 | 0     | 0,997865616 | -0,12 | 0,751312765 | -0,27 | 0,623214829 |
| Rhobtb1 | -0,04 | 0,952453567 | 0,72  | 0,377669413 | -0,43 | 0,523680014 | 0,44  | 0,438725241 | 0,01  | 0,990633766 |
| Rhobtb2 | -0,47 | 0,249044729 | -0,17 | 0,800821935 | 0,2   | 0,811064301 | -0,13 | 0,866735562 | 0,13  | 0,89565056  |
| Rhobtb3 | -0,86 | 0,185926518 | -0,58 | 0,606573358 | 1,01  | 0,209534486 | -0,52 | 0,425337107 | -0,55 | 0,549181666 |
| Rhoc    | -0,09 | 0,835016158 | 0,03  | 0,958187617 | -0,15 | 0,759368521 | 0,56  | 0,133201282 | 0,18  | 0,743487161 |
| Rhod    | -1,45 | 0,189684245 | -0,14 | 0,820806352 | 0,63  | 0,47804917  | 0,92  | 0,339455217 | -1    | 0,373805048 |
| Rhof    | 0,12  | 0,918429415 | 0,21  | 0,732044571 | 0     | 0,998479176 | -0,3  | 0,67815282  | 0,26  | 0,767310323 |
| Rhog    | 0,26  | 0,53686867  | 0,19  | 0,638366221 | 0,03  | 0,970398561 | -0,17 | 0,665208114 | 0,04  | 0,965208482 |
| Rhoh    | -0,31 | 0,652819827 | -0,23 | 0,736459323 | 0,21  | 0,708957676 | -0,21 | 0,671528487 | 0,14  | 0,823419894 |
| Rhoj    | -0,49 | 0,289814513 | -0,15 | 0,769088831 | 0,14  | 0,814072863 | -0,38 | 0,36494482  | -0,41 | 0,442639471 |
| Rhoq    | 0,61  | 0,461113298 | 0,05  | 0,974890527 | 0,71  | 0,124912754 | -0,61 | 0,094989023 | -0,36 | 0,513517573 |
| Rhot1   | -0,43 | 0,720816873 | 0,06  | 0,95025097  | 0,03  | 0,97674065  | -0,04 | 0,960885529 | -0,16 | 0,875520848 |
| Rhot2   | -0,33 | 0,654363277 | 0,07  | 0,898436786 | 0,7   | 0,116607178 | -0,7  | 0,17347019  | -0,46 | 0,445196556 |
| Rhou    | 0,49  | 0,583196213 | 0,05  | 0,963168371 | 0,5   | 0,839669459 | -1,05 | 0,12405123  | -0,63 | 0,640616198 |
| Rhov    | -0,46 | 0,434641897 | -0,17 | 0,896381982 | 0,28  | 0,69423863  | 0,25  | 0,552731038 | -0,12 | 0,888858935 |
| Rhox1   | 0,32  | 0,767849254 | 0,1   | 0,890945229 | -0,01 | 0,99407001  | 0,08  | 0,852596465 | 0,21  | 0,887732548 |
| Rhox10  | 0,53  | 0,376151377 | -0,41 | 0,489333191 | 0,11  | 0,911634383 | 0,18  | 0,783511455 | -0,25 | 0,693672681 |
| Rhox11  | 0,13  | 0,774822327 | -0,19 | 0,644516897 | -0,45 | 0,343594254 | 0,35  | 0,349962918 | 0,12  | 0,884248437 |
| Rhox12  | -0,04 | 0,976870178 | -0,16 | 0,843162191 | 0,16  | 0,898935616 | 0,07  | 0,935746937 | -0,01 | 0,994270272 |
| Rhox13  | -0,08 | 0,931445059 | 0,36  | 0,440114196 | -0,21 | 0,839026298 | -0,59 | 0,609415126 | 0,48  | 0,521841588 |
| Rhox2d  | 0,2   | 0,72989626  | 0,19  | 0,883093763 | -0,14 | 0,858535508 | 0,02  | 0,978782666 | 0,11  | 0,900126162 |
| Rhox2f  | -0,12 | 0,793209485 | 0,12  | 0,816543137 | -0,01 | 0,993379272 | 0,05  | 0,906676611 | 0,16  | 0,808526606 |
| Rhox2g  | 0,16  | 0,892124736 | -0,78 | 0,172168187 | -0,35 | 0,606295906 | 0,77  | 0,389365602 | -0,09 | 0,955654991 |
| Rhox2h  | 0,32  | 0,666546952 | 0,4   | 0,791426435 | 0,19  | 0,862441091 | -0,28 | 0,731281458 | 0,6   | 0,456658287 |
| Rhox3c  | 0     | 0,998927419 | 0,47  | 0,794404033 | 0,08  | 0,947531665 | -0,17 | 0,766136201 | -0,12 | 0,911850421 |
| Rhox3f  | 0,18  | 0,77892269  | 0,15  | 0,891566803 | -0,1  | 0,888562803 | -0,18 | 0,680737645 | 0,21  | 0,842936569 |
| Rhox3h  | 0     | 0,998307191 | 0,17  | 0,717240537 | -0,42 | 0,513446928 | -0,43 | 0,467700021 | -0,24 | 0,715879151 |
| Rhox4c  | -0,18 | 0,854724272 | 0,14  | 0,951768918 | -0,6  | 0,204247489 | 0,25  | 0,855784146 | 0,13  | 0,86493772  |
| Rhox4e  | 0,27  | 0,782876517 | 0,18  | 0,74245372  | 0,24  | 0,698473929 | -0,07 | 0,898791139 | 0,41  | 0,518944192 |
| Rhox4f  | 0,22  | 0,752970477 | -0,07 | 0,947107147 | 0,02  | 0,990836784 | -0,46 | 0,498979274 | -0,02 | 0,986971861 |
| Rhox4g  | -0,49 | 0,503972678 | 0,23  | 0,839789639 | -0,38 | 0,548288344 | 0,24  | 0,51764991  | 0,34  | 0,745134899 |
| Rhox5   | 0,18  | 0,940107174 | 0,1   | 0,856849823 | 0,14  | 0,946478083 | -0,08 | 0,887406698 | 0,49  | 0,639071244 |
| Rhox6   | -0,26 | 0,524844843 | 0,06  | 0,966132962 | -0,15 | 0,790339565 | -0,46 | 0,179012087 | 0,21  | 0,78432727  |

|        |       |             |       |             |       |             |       |             |       |             |
|--------|-------|-------------|-------|-------------|-------|-------------|-------|-------------|-------|-------------|
| Rhox7a | 0,26  | 0,713874683 | 0,03  | 0,981853964 | -0,22 | 0,742784486 | -0,12 | 0,906297748 | 0,49  | 0,315168806 |
| Rhox8  | -0,05 | 0,965482773 | 0,03  | 0,948471284 | -0,35 | 0,54285973  | 0,12  | 0,893001702 | 0,19  | 0,822628064 |
| Rhox9  | -0,07 | 0,909656399 | 0,02  | 0,984996606 | -0,14 | 0,837375184 | -0,01 | 0,985756322 | 0,3   | 0,66172398  |
| Rhpn1  | -0,22 | 0,803557792 | -0,15 | 0,87704132  | 0,1   | 0,914301036 | -0,08 | 0,908141892 | -0,27 | 0,74590767  |
| Rhpn2  | 0,02  | 0,982552406 | 0,38  | 0,761404909 | 0,35  | 0,715407764 | -3,36 | 0,004264722 | -0,45 | 0,454357813 |
| Rian   | -0,87 | 0,61807202  | -0,12 | 0,945143056 | 0,7   | 0,400880567 | -0,25 | 0,750643604 | -0,24 | 0,825697364 |
| Ribc1  | -0,02 | 0,991919022 | 0,01  | 0,998271266 | -0,2  | 0,723037215 | -1,18 | 0,109744273 | -0,05 | 0,97425848  |
| Ribc2  | -0,12 | 0,896207658 | 0,08  | 0,932292974 | -0,3  | 0,794830621 | 0,15  | 0,831764227 | 0,43  | 0,528089671 |
| Ric1   | -0,25 | 0,766898048 | 0,03  | 0,960253381 | -0,13 | 0,894040977 | 0,28  | 0,593856968 | 0,2   | 0,833488713 |
| Ric3   | 0,08  | 0,89763852  | 0,01  | 0,99691664  | -0,57 | 0,474190776 | 0,02  | 0,983061756 | 0,49  | 0,376385479 |
| Ric8a  | -0,03 | 0,971922167 | -0,42 | 0,495197335 | 0,4   | 0,570233796 | -0,28 | 0,414522125 | -0,5  | 0,246316824 |
| Ric8b  | -0,94 | 0,593405815 | 0,03  | 0,975959817 | 0,37  | 0,88515397  | 0,3   | 0,818242274 | 0,27  | 0,875713596 |
| Rictor | 0,38  | 0,36075848  | -0,05 | 0,952498373 | -0,04 | 0,94940954  | -0,49 | 0,431974229 | -0,2  | 0,820234867 |
| Rida   | -0,04 | 0,972667767 | -0,57 | 0,585308878 | -0,02 | 0,99407001  | -0,83 | 0,267639393 | -0,28 | 0,679810349 |
| Rif1   | -0,8  | 0,552070283 | -0,37 | 0,634424292 | 1,3   | 0,260217755 | -0,41 | 0,49801585  | 0,2   | 0,823098095 |
| Riiad1 | -0,51 | 0,613990129 | 0,3   | 0,863233628 | -0,12 | 0,916477664 | -0,67 | 0,086511653 | 0,2   | 0,931519966 |
| Rilp   | 0,05  | 0,94916801  | -0,14 | 0,823530278 | 0,2   | 0,8026742   | -0,71 | 0,081485862 | -0,39 | 0,428502729 |
| Rilpl1 | -0,66 | 0,323723495 | 0,41  | 0,559070514 | 0,58  | 0,156156107 | -0,97 | 0,18311375  | -0,3  | 0,757184082 |
| Rilpl2 | 0,08  | 0,919398848 | 0,05  | 0,959837002 | 0,19  | 0,816710945 | -0,05 | 0,947533747 | -0,3  | 0,549181666 |
| Rimbp2 | 0,01  | 0,993728727 | -0,11 | 0,917821097 | 0,09  | 0,921956183 | 0,12  | 0,87811903  | -0,16 | 0,902540251 |
| Rimbp3 | 0,08  | 0,937385547 | -0,1  | 0,919873208 | -0,24 | 0,709317317 | -0,06 | 0,923959343 | 0,22  | 0,748710615 |
| Rimkla | -0,37 | 0,501390979 | -0,02 | 0,989544005 | 0,05  | 0,961800548 | -0,24 | 0,43636337  | -0,06 | 0,937558003 |
| Rimklb | 0,54  | 0,518400371 | -0,15 | 0,809683705 | 0,68  | 0,473499244 | 0,3   | 0,563573506 | 0,06  | 0,957010996 |
| Rims1  | 0,13  | 0,817161317 | 0,03  | 0,982047684 | -0,75 | 0,321725685 | -0,09 | 0,91375912  | -0,35 | 0,619398753 |
| Rims2  | -0,19 | 0,731058317 | -0,04 | 0,978528738 | -0,41 | 0,560191012 | -0,04 | 0,955119589 | -0,08 | 0,949244147 |
| Rims3  | 0,28  | 0,61200942  | 0,29  | 0,624712123 | 0,37  | 0,546286708 | -0,7  | 0,284374871 | 0,19  | 0,852571477 |
| Rims4  | -0,17 | 0,748619201 | 0,07  | 0,963369162 | 0,13  | 0,901211921 | 0,08  | 0,910298592 | 0,03  | 0,979392852 |
| Rin1   | -0,24 | 0,654459777 | -0,18 | 0,824372931 | -0,3  | 0,823823322 | 0,25  | 0,647789119 | 0,22  | 0,723036695 |
| Rin2   | -0,56 | 0,421957622 | -0,76 | 0,487784005 | 0,92  | 0,04421786  | -1,87 | 0,024008426 | -1,15 | 0,02116496  |
| Rin3   | -0,5  | 0,351381228 | -0,82 | 0,268073284 | 0,29  | 0,642904349 | -0,03 | 0,978569268 | -0,81 | 0,311435865 |
| Ring1  | 0,08  | 0,931964207 | -0,19 | 0,74534168  | -0,3  | 0,754711637 | -0,08 | 0,835780773 | 0,12  | 0,84465607  |
| Rinl   | -0,05 | 0,962857082 | -0,3  | 0,589100557 | -0,02 | 0,978840171 | -0,7  | 0,147832466 | -0,34 | 0,541434584 |
| Rint1  | -0,24 | 0,799359492 | -0,34 | 0,655368392 | 0,5   | 0,516728404 | 0,51  | 0,562463121 | -0,05 | 0,97425848  |
| Riok1  | 0,01  | 0,993175772 | -0,13 | 0,835696572 | -0,01 | 0,995401448 | 0,39  | 0,2749761   | 0,74  | 0,150296522 |
| Riok2  | -0,26 | 0,648730873 | -0,08 | 0,883145635 | -0,65 | 0,347983286 | 0,85  | 0,034716795 | 0,51  | 0,241394095 |

|         |       |             |       |             |       |             |       |             |       |             |
|---------|-------|-------------|-------|-------------|-------|-------------|-------|-------------|-------|-------------|
| Riok3   | 0     | 0,999536558 | 0,01  | 0,996259587 | 0,1   | 0,90283613  | 0,48  | 0,290774064 | -0,28 | 0,662728263 |
| Ripk1   | 0,69  | 0,110762724 | 0,44  | 0,472042875 | -0,1  | 0,901816517 | -0,34 | 0,349197576 | 0,65  | 0,135418412 |
| Ripk2   | 0,89  | 0,111767257 | 0,67  | 0,166830486 | -0,05 | 0,959696615 | 0,87  | 0,033468792 | 1,28  | 0,011936684 |
| Ripk3   | -0,01 | 0,993175772 | 0,39  | 0,426088176 | 0,08  | 0,953951069 | 2,11  | 0,004331967 | 0,82  | 0,197214574 |
| Ripk4   | 0,06  | 0,950669622 | -0,35 | 0,494858163 | 0,51  | 0,369527192 | -0,15 | 0,733028982 | -0,5  | 0,492222522 |
| Ripply1 | 0,67  | 0,64776317  | 0,22  | 0,910688765 | -0,13 | 0,868451584 | -0,51 | 0,22844695  | -0,25 | 0,665054064 |
| Ripply2 | 0,29  | 0,642385552 | -0,19 | 0,748605628 | -0,4  | 0,612703667 | -0,05 | 0,898116464 | 0,04  | 0,973369302 |
| Ripply3 | -0,19 | 0,819634768 | 0,46  | 0,456156525 | -0,24 | 0,737821076 | -2,59 | 0,017567969 | 0,27  | 0,787689553 |
| Rit1    | 0,29  | 0,568136316 | 0,04  | 0,969296652 | 0,15  | 0,830336321 | -0,48 | 0,329098653 | -0,11 | 0,910212022 |
| Rit2    | 0,13  | 0,826621773 | 0,26  | 0,698886888 | 0,19  | 0,824859002 | -0,06 | 0,963148025 | 0,22  | 0,816940286 |
| Rita1   | 0,04  | 0,971923664 | -0,16 | 0,756584634 | 0,11  | 0,901816517 | 0,01  | 0,987247308 | -0,35 | 0,699059557 |
| Rlbp1   | 0,14  | 0,785491059 | 0,1   | 0,861905894 | -0,3  | 0,541138907 | 0     | 1           | 0,1   | 0,898448235 |
| Rlf     | -0,35 | 0,63880179  | 0,22  | 0,723989536 | 0,14  | 0,865145801 | 0,5   | 0,253294027 | -0,19 | 0,904040121 |
| Rlim    | -0,02 | 0,98297164  | 0,31  | 0,4009169   | -0,1  | 0,86834176  | 0,32  | 0,582827953 | 0,24  | 0,750764819 |
| Rln1    | 0,04  | 0,965496494 | -0,17 | 0,785244931 | -0,38 | 0,55109602  | 0,01  | 0,991453278 | -0,25 | 0,822709063 |
| Rln3    | 0,11  | 0,867692799 | -0,09 | 0,857408462 | -0,3  | 0,497205965 | 0,22  | 0,612100419 | 0,03  | 0,978981442 |
| Rltpr   | 0,19  | 0,766705553 | -0,27 | 0,609769897 | 0,01  | 0,997268369 | 0,21  | 0,785121965 | -0,14 | 0,904830156 |
| Rmdn1   | -0,11 | 0,905414735 | 0,57  | 0,443318093 | 0,07  | 0,946845275 | -0,86 | 0,103449425 | -0,54 | 0,329284951 |
| Rmdn2   | -0,33 | 0,783200207 | -0,08 | 0,966705367 | 0,09  | 0,95303117  | 0,25  | 0,87811903  | -1,18 | 0,332695011 |
| Rmdn3   | 0,29  | 0,695313784 | 1,44  | 0,090262898 | -1,09 | 0,096249839 | 0,31  | 0,63142092  | 1,76  | 0,026466797 |
| Rmi1    | -0,17 | 0,808947569 | -0,21 | 0,643743213 | 0,12  | 0,846176253 | 0,18  | 0,651463939 | 0,14  | 0,860908707 |
| Rmi2    | -0,16 | 0,848837214 | -0,2  | 0,842663656 | -0,11 | 0,94550347  | 0,93  | 0,099292323 | 0,56  | 0,220159635 |
| Rmnd1   | -0,11 | 0,875555348 | -0,23 | 0,784199242 | -0,15 | 0,84318645  | 0,37  | 0,507026257 | -0,27 | 0,765340194 |
| Rmnd5a  | -0,28 | 0,65525391  | -0,06 | 0,975959817 | 0,47  | 0,526617718 | -0,35 | 0,739831108 | 0,3   | 0,814032603 |
| Rmnd5b  | 0,14  | 0,763867597 | -0,24 | 0,561004864 | 0,42  | 0,411884367 | 0,33  | 0,343231604 | -0,33 | 0,574932966 |
| Rmrp    | 0,27  | 0,517149278 | 0,31  | 0,568282579 | -0,17 | 0,878636183 | -0,34 | 0,387999282 | 0,21  | 0,751268314 |
| Rmst    | 0,16  | 0,869225685 | 1,3   | 0,172703381 | -0,71 | 0,230563018 | 0,31  | 0,797586874 | 0,23  | 0,893737959 |
| Rn45s   | -0,34 | 0,318041432 | -0,01 | 0,9860901   | 0,02  | 0,983471086 | -0,16 | 0,647435447 | -0,06 | 0,947559952 |
| Rn7sk   | -0,05 | 0,917259942 | 0     | 1           | -0,13 | 0,804434463 | -0,07 | 0,864379203 | 0,02  | 0,978604922 |
| Rnase1  | -0,33 | 0,60348583  | -0,46 | 0,501438027 | 0,16  | 0,841942589 | 0,27  | 0,754318983 | -0,38 | 0,75618373  |
| Rnase10 | 0,35  | 0,642618049 | -0,53 | 0,216491969 | 0,03  | 0,984407511 | -0,49 | 0,330811431 | 0,07  | 0,954892212 |
| Rnase11 | 0,55  | 0,319596051 | 0,06  | 0,89081665  | -0,02 | 0,985977985 | 0,15  | 0,690263313 | 0,01  | 0,988103461 |
| Rnase12 | -0,18 | 0,692648542 | 0,02  | 0,974580396 | -0,11 | 0,849342965 | -0,2  | 0,80341881  | 0,41  | 0,78512653  |
| Rnase13 | 0,3   | 0,562631168 | 0,34  | 0,610055593 | 0,14  | 0,821977764 | 0,08  | 0,899003207 | 0,39  | 0,602231893 |
| Rnase2a | -0,04 | 0,956452501 | -0,04 | 0,9554581   | 0,08  | 0,921956183 | 0,16  | 0,648473202 | 0,18  | 0,767309117 |

|           |       |             |       |             |       |             |       |             |       |             |
|-----------|-------|-------------|-------|-------------|-------|-------------|-------|-------------|-------|-------------|
| Rnase2b   | -0,19 | 0,763657448 | 0,06  | 0,912535732 | 0,2   | 0,702677589 | 0,05  | 0,911916626 | 0,05  | 0,959940191 |
| Rnase4    | -0,31 | 0,718904956 | -1,01 | 0,366844864 | 0,39  | 0,69871815  | 0,21  | 0,778212842 | -0,13 | 0,892726344 |
| Rnase6    | 0,08  | 0,948926586 | 0,03  | 0,984006421 | -0,09 | 0,898935616 | 0,24  | 0,499512231 | -0,02 | 0,98653183  |
| Rnase9    | -0,14 | 0,786323763 | 0,23  | 0,669713758 | -0,25 | 0,622546805 | -0,05 | 0,919668684 | -0,03 | 0,973382116 |
| Rnaseh1   | -0,6  | 0,376151377 | -0,08 | 0,967338233 | 0,2   | 0,816883729 | 0,19  | 0,578047707 | -0,22 | 0,799019424 |
| Rnaseh2a  | -0,4  | 0,343763562 | -0,43 | 0,406817158 | 0,39  | 0,420043356 | 0,67  | 0,649891314 | 0,07  | 0,976743304 |
| Rnaseh2b  | 0,24  | 0,84900712  | 0,55  | 0,548858367 | 0,23  | 0,870377336 | 0,53  | 0,721363271 | 1,3   | 0,332695011 |
| Rnaseh2c  | -0,37 | 0,443068183 | 0,1   | 0,84748177  | -0,16 | 0,842960684 | -0,07 | 0,920589831 | -0,24 | 0,789985499 |
| Rnasek    | 0,27  | 0,462803939 | 0     | 1           | 0,08  | 0,912082811 | 0,26  | 0,556282326 | 0,32  | 0,628728585 |
| Rnasel    | 0,5   | 0,561414711 | 1,35  | 0,077698935 | -0,48 | 0,546090759 | -0,33 | 0,744077504 | 0,12  | 0,947257087 |
| Rnaset2a  | 0,35  | 0,357414551 | 0,08  | 0,920313484 | -0,37 | 0,637835827 | -0,12 | 0,804362093 | 0,33  | 0,526527239 |
| Rnd1      | 0,46  | 0,297996662 | 0,38  | 0,34689645  | -0,08 | 0,9122363   | 0,71  | 0,10628439  | 0,18  | 0,808378459 |
| Rnd2      | 0,4   | 0,758636946 | -0,16 | 0,905517116 | -0,09 | 0,922318683 | -0,77 | 0,177747639 | -0,16 | 0,859009237 |
| Rnd3      | -0,15 | 0,721922161 | 1,23  | 0,392843884 | 0,19  | 0,910908762 | 0,68  | 0,659461543 | 1,11  | 0,362275161 |
| Rnf10     | -0,06 | 0,905414735 | -0,08 | 0,857490594 | -0,31 | 0,613380041 | 0,44  | 0,286855307 | -0,14 | 0,86244757  |
| Rnf103    | -0,37 | 0,569522239 | -0,13 | 0,828219939 | 0,49  | 0,427646555 | -0,09 | 0,854342596 | -0,58 | 0,512028199 |
| Rnf11     | 0,21  | 0,853867512 | 0,01  | 0,999210601 | 0,5   | 0,475629395 | 0,75  | 0,32916006  | 0,96  | 0,216981201 |
| Rnf111    | 0,01  | 0,98659023  | -0,11 | 0,926157704 | -0,27 | 0,694941328 | 0,54  | 0,325923875 | 0,1   | 0,942469878 |
| Rnf112    | 0,28  | 0,548150596 | 0,13  | 0,805467498 | 0,22  | 0,786838878 | 0     | 0,999699161 | -0,13 | 0,859663155 |
| Rnf113a1  | 0,72  | 0,239601221 | -0,64 | 0,372823162 | -0,62 | 0,388144291 | 0,44  | 0,48546658  | 0,09  | 0,948935854 |
| Rnf113a2  | 0,06  | 0,942119638 | 0,01  | 0,997700959 | -0,32 | 0,773365699 | 0,05  | 0,965653854 | 0,48  | 0,647258599 |
| Rnf114    | 0,56  | 0,269264884 | 1,2   | 0,138647411 | -0,71 | 0,15369828  | -0,12 | 0,797123056 | 0,79  | 0,159252449 |
| Rnf115    | 0,27  | 0,645120888 | 0,44  | 0,279705451 | -0,46 | 0,342313446 | 0,13  | 0,750283421 | 0,46  | 0,324093515 |
| Rnf121    | -0,01 | 0,991919022 | 0,02  | 0,984121306 | -0,14 | 0,832500603 | 0,56  | 0,284968897 | 0,4   | 0,520948388 |
| Rnf122    | 0,3   | 0,505017195 | 0,52  | 0,457713517 | -0,53 | 0,231640032 | 1,25  | 0,053645239 | 0,79  | 0,168781914 |
| Rnf123    | -0,28 | 0,642618049 | 0,17  | 0,82505545  | -0,29 | 0,721854567 | 0     | 0,996769706 | 0,12  | 0,893358521 |
| Rnf125    | 0,45  | 0,264937591 | 0,08  | 0,855632384 | -0,19 | 0,746677927 | 1,39  | 0,012516129 | -0,04 | 0,970154126 |
| Rnf126    | -0,29 | 0,519823113 | -0,16 | 0,756267547 | 0,06  | 0,940619966 | 0,74  | 0,108984119 | 0,03  | 0,97425848  |
| Rnf128    | 0,38  | 0,600952042 | -0,59 | 0,242981491 | -0,22 | 0,82622365  | 0     | 1           | 0,95  | 0,216208625 |
| Rnf13     | 0,08  | 0,949236157 | 0,03  | 0,985764487 | -0,19 | 0,873867385 | -0,36 | 0,532906357 | 0,36  | 0,567306543 |
| Rnf130    | 0,22  | 0,563164645 | 0,03  | 0,989633095 | 0,16  | 0,859411859 | -1,25 | 0,037611998 | -0,45 | 0,427146889 |
| Rnf133    | 0,14  | 0,870052902 | -0,06 | 0,966078321 | 0,12  | 0,871982841 | -0,22 | 0,603439118 | 0,12  | 0,91314596  |
| Rnf135    | 1,04  | 0,186254202 | 1,13  | 0,077861305 | -0,86 | 0,102598343 | 1,01  | 0,134614217 | 1,16  | 0,11360863  |
| Rnf138    | 0,49  | 0,414725647 | 0,03  | 0,961370411 | 0,4   | 0,770526999 | 0,25  | 0,614988695 | 0,12  | 0,920355527 |
| Rnf138rt1 | 0,1   | 0,817366963 | -0,09 | 0,843162191 | -0,03 | 0,969928932 | 0,1   | 0,797698115 | 0,19  | 0,746672639 |

|         |       |             |       |             |       |             |       |             |       |             |
|---------|-------|-------------|-------|-------------|-------|-------------|-------|-------------|-------|-------------|
| Rnf139  | 0,07  | 0,926692467 | 0,32  | 0,816570348 | -1,36 | 0,07952748  | 0,02  | 0,987977078 | 0,6   | 0,479209783 |
| Rnf14   | -0,2  | 0,818966834 | 0,06  | 0,932292974 | -0,36 | 0,70130819  | 0,53  | 0,184464257 | 0,68  | 0,174362184 |
| Rnf141  | -0,16 | 0,825701426 | -0,37 | 0,525873177 | -0,91 | 0,09059546  | 0,37  | 0,246627022 | -0,34 | 0,499998316 |
| Rnf144a | -1,09 | 0,092850129 | -0,01 | 0,998530526 | 0,03  | 0,985326269 | -0,35 | 0,457125324 | -0,14 | 0,86964167  |
| Rnf144b | -0,46 | 0,454252481 | 0,14  | 0,873411651 | -0,53 | 0,340237423 | -1,16 | 0,014713092 | -0,79 | 0,161547199 |
| Rnf145  | 0,09  | 0,886741208 | 0,06  | 0,926353869 | 0,32  | 0,64300681  | -0,38 | 0,419333376 | -0,03 | 0,984125319 |
| Rnf146  | -0,12 | 0,885955034 | 0,23  | 0,882847123 | -0,18 | 0,807727786 | 0,01  | 0,999221046 | 0,32  | 0,758580909 |
| Rnf148  | -0,23 | 0,586458491 | 0,14  | 0,767178812 | 0,24  | 0,709222239 | 0,19  | 0,604479227 | 0,41  | 0,490247948 |
| Rnf149  | -0,02 | 0,989784447 | -0,14 | 0,84333279  | 0,3   | 0,808065828 | 0,29  | 0,61358606  | -0,13 | 0,864166878 |
| Rnf150  | 0,13  | 0,902306009 | 0,48  | 0,277568816 | 0,3   | 0,57070304  | -0,54 | 0,176988212 | -0,78 | 0,244289043 |
| Rnf151  | 0,22  | 0,824639882 | 0,13  | 0,916247917 | 0,66  | 0,433481425 | -0,14 | 0,696873252 | -0,07 | 0,969994712 |
| Rnf152  | 0,39  | 0,699641744 | 0,05  | 0,984006421 | 1,74  | 0,036818657 | -0,45 | 0,803183466 | -0,27 | 0,823419894 |
| Rnf157  | -0,28 | 0,681371768 | -0,25 | 0,751409098 | 0,65  | 0,377702044 | -0,21 | 0,894634041 | -0,67 | 0,582734169 |
| Rnf165  | -0,53 | 0,310600448 | -0,04 | 0,967776673 | 0,48  | 0,534181832 | -0,06 | 0,957573971 | -0,15 | 0,894623317 |
| Rnf166  | -0,06 | 0,923033769 | 0,38  | 0,596930496 | 0,14  | 0,85952125  | -0,23 | 0,674665764 | -0,03 | 0,976743304 |
| Rnf167  | 0,47  | 0,461113298 | 0,2   | 0,771847912 | -0,04 | 0,9566014   | -1,74 | 0,008006726 | -0,37 | 0,454357813 |
| Rnf168  | -0,22 | 0,719691888 | -0,62 | 0,297047741 | 0,26  | 0,617943722 | -0,24 | 0,505738929 | -0,01 | 0,991115166 |
| Rnf169  | 0,05  | 0,966775766 | -0,14 | 0,783862212 | 0,17  | 0,853753298 | -0,69 | 0,118061566 | -0,51 | 0,570044827 |
| Rnf17   | 0,29  | 0,665609782 | 0,01  | 0,997700959 | -0,24 | 0,655876476 | 0,21  | 0,698774545 | 0,29  | 0,647258599 |
| Rnf170  | -0,22 | 0,858748956 | -0,44 | 0,760679726 | 0,82  | 0,432229079 | -0,11 | 0,967866794 | -1,01 | 0,601055983 |
| Rnf180  | 0,06  | 0,941218573 | 0,15  | 0,889437471 | 0,29  | 0,766234611 | 0,26  | 0,598657551 | -0,09 | 0,946463658 |
| Rnf181  | 0,06  | 0,921898929 | -0,03 | 0,966717367 | 0,16  | 0,868609956 | -0,51 | 0,173468279 | 0,06  | 0,938286826 |
| Rnf182  | 0,45  | 0,226401875 | -0,02 | 0,989843833 | -0,07 | 0,925248877 | -0,01 | 0,992906132 | 0     | 0,9969305   |
| Rnf183  | -0,15 | 0,814444163 | -0,23 | 0,717526173 | 0,15  | 0,927950027 | 0,99  | 0,101735024 | 0,05  | 0,97203071  |
| Rnf185  | 0,01  | 0,995778597 | -0,54 | 0,487451484 | -0,1  | 0,935551541 | 0,13  | 0,886071047 | -0,3  | 0,823195944 |
| Rnf186  | 0,37  | 0,733583213 | 0,1   | 0,862088357 | 0,23  | 0,711472088 | 0,11  | 0,779547737 | 0,33  | 0,626176831 |
| Rnf187  | -0,12 | 0,886741208 | -0,5  | 0,459231649 | 0,29  | 0,545465016 | -0,22 | 0,619727689 | 0,18  | 0,76529609  |
| Rnf19a  | 0,24  | 0,765290489 | 0,18  | 0,657157409 | 0,36  | 0,68845998  | -0,44 | 0,639765346 | -0,2  | 0,877414092 |
| Rnf19b  | 1,54  | 0,027076994 | 1,47  | 0,147949735 | -1,25 | 0,007209282 | 0,83  | 0,204120985 | 1,64  | 0,011688351 |
| Rnf2    | -0,2  | 0,720783705 | -0,07 | 0,895486883 | 1,06  | 0,313065218 | 0,28  | 0,50727769  | 0,43  | 0,443268905 |
| Rnf20   | -0,29 | 0,771904131 | -0,26 | 0,790939978 | 0,99  | 0,186321498 | 0,19  | 0,713062148 | -0,5  | 0,483221438 |
| Rnf207  | -0,24 | 0,739638841 | -0,77 | 0,173488446 | 0,04  | 0,972285775 | 0,76  | 0,252992148 | 0,18  | 0,871876889 |
| Rnf208  | -0,01 | 0,996998625 | -0,17 | 0,695736456 | -0,12 | 0,906097666 | 0,22  | 0,736730464 | 0,22  | 0,80476246  |
| Rnf212  | 0,11  | 0,837953479 | -0,34 | 0,664446076 | -0,3  | 0,655349437 | 0,09  | 0,90213506  | -0,37 | 0,503212672 |
| Rnf212b | -0,23 | 0,680776928 | 0,15  | 0,941628939 | 0,02  | 0,987324803 | -0,23 | 0,774226984 | -0,18 | 0,859615999 |

|        |       |             |       |             |       |             |       |             |       |             |
|--------|-------|-------------|-------|-------------|-------|-------------|-------|-------------|-------|-------------|
| Rnf213 | 0,43  | 0,397054492 | 0,59  | 0,159624954 | -0,8  | 0,249821562 | 0,45  | 0,202620533 | 0,87  | 0,05548171  |
| Rnf214 | 0,28  | 0,560461791 | 0,05  | 0,934294134 | -0,09 | 0,938864861 | 0,16  | 0,675848023 | -0,11 | 0,880318471 |
| Rnf215 | -0,09 | 0,841492942 | -0,06 | 0,956504634 | -0,43 | 0,463786432 | -0,93 | 0,077623694 | -0,07 | 0,956585095 |
| Rnf216 | -0,16 | 0,821012931 | -0,44 | 0,334172379 | -0,44 | 0,599222964 | -0,25 | 0,561656192 | -0,15 | 0,831446445 |
| Rnf217 | 0,84  | 0,106547713 | 0,82  | 0,118661465 | -0,15 | 0,811323099 | -1,1  | 0,022167784 | -0,3  | 0,71621363  |
| Rnf219 | -0,28 | 0,790858417 | -0,21 | 0,59429727  | 0,76  | 0,215124832 | -0,07 | 0,931477012 | 0,08  | 0,947254077 |
| Rnf220 | -0,07 | 0,949362206 | -0,09 | 0,89034555  | -0,04 | 0,97041109  | -0,4  | 0,391503162 | -0,31 | 0,702558142 |
| Rnf222 | 0,48  | 0,496008309 | 0,19  | 0,794779068 | -0,03 | 0,971268254 | -0,31 | 0,529927445 | -0,05 | 0,953971867 |
| Rnf223 | 0,01  | 0,993728727 | -0,06 | 0,941705846 | 0,12  | 0,854228198 | -0,31 | 0,561974365 | -0,21 | 0,792305774 |
| Rnf224 | 0,13  | 0,776839834 | 0,02  | 0,979002922 | -0,09 | 0,925248877 | -0,03 | 0,970274588 | 0,24  | 0,738260196 |
| Rnf225 | -0,33 | 0,616954136 | 0,22  | 0,742730285 | -0,01 | 0,99597438  | 0,59  | 0,298407511 | -0,29 | 0,73096179  |
| Rnf24  | 0,55  | 0,489766805 | 0,94  | 0,191605725 | 0,49  | 0,552212491 | 1,62  | 0,035124962 | 0,17  | 0,868066981 |
| Rnf25  | 0,18  | 0,782586323 | 0,18  | 0,750325684 | 0,11  | 0,922971065 | -0,55 | 0,14723865  | -0,16 | 0,853107295 |
| Rnf26  | -0,01 | 0,985394861 | 0,09  | 0,894697527 | 0,34  | 0,514610288 | 0,34  | 0,499022095 | 0,03  | 0,977599806 |
| Rnf31  | 0,79  | 0,167048754 | 0,73  | 0,10752682  | -0,81 | 0,080523802 | -0,72 | 0,05675691  | 0,61  | 0,244965154 |
| Rnf32  | -0,04 | 0,963865514 | 1,13  | 0,213731156 | -0,07 | 0,953738148 | -0,9  | 0,123674767 | -0,17 | 0,840687596 |
| Rnf34  | -0,7  | 0,239601221 | -0,24 | 0,596827853 | 0,97  | 0,461018172 | 0,12  | 0,781338312 | -0,22 | 0,715879151 |
| Rnf38  | 0,16  | 0,766776198 | -0,04 | 0,970762922 | 0,12  | 0,891365932 | 0,12  | 0,751826661 | -0,06 | 0,931666842 |
| Rnf39  | 0,1   | 0,909304056 | -0,25 | 0,785244931 | -0,34 | 0,715910767 | -0,13 | 0,825899927 | 0,11  | 0,944318268 |
| Rnf4   | -0,16 | 0,714662474 | -0,03 | 0,945656726 | 0     | 0,998479656 | 0,39  | 0,247679503 | 0,07  | 0,917710291 |
| Rnf40  | -0,53 | 0,279793863 | -0,1  | 0,883639748 | 0,41  | 0,389841181 | -0,01 | 0,985897275 | -0,13 | 0,865258929 |
| Rnf41  | -0,02 | 0,979006273 | -0,14 | 0,732847182 | 0,27  | 0,706029076 | 0,49  | 0,172716161 | -0,01 | 0,991980521 |
| Rnf43  | 0,34  | 0,539226089 | -0,23 | 0,674709201 | -0,33 | 0,546857162 | 0,28  | 0,469495727 | 0,36  | 0,529128921 |
| Rnf44  | -0,45 | 0,376797035 | -0,04 | 0,973945454 | 0,03  | 0,973802765 | 0     | 1           | -0,31 | 0,639071244 |
| Rnf5   | -0,36 | 0,423395139 | -0,43 | 0,416922779 | 0,39  | 0,37686469  | 0,38  | 0,346429977 | 0,02  | 0,981439632 |
| Rnf6   | 0,09  | 0,895359408 | 0,04  | 0,976014625 | -0,18 | 0,886920133 | 0,32  | 0,472949967 | 0,47  | 0,499998316 |
| Rnf8   | -0,12 | 0,803557792 | -0,55 | 0,218471516 | 0,4   | 0,465949919 | -0,34 | 0,310873282 | -0,11 | 0,889613878 |
| Rnft1  | 0,04  | 0,978542552 | -0,22 | 0,714590086 | 0,37  | 0,791876238 | -0,3  | 0,400664527 | 0,1   | 0,927238751 |
| Rnft2  | -0,4  | 0,560225988 | -0,32 | 0,467853942 | -0,02 | 0,988373086 | 0,53  | 0,181391876 | 0,15  | 0,825697364 |
| Rngtt  | -0,32 | 0,700358581 | 0,18  | 0,80097084  | 0,3   | 0,816847539 | -0,14 | 0,823323944 | 0,25  | 0,741766428 |
| Rnh1   | 0,07  | 0,898269435 | 0,19  | 0,646613262 | 0,62  | 0,387309747 | 0,32  | 0,389207462 | -0,05 | 0,954565959 |
| Rnls   | -0,26 | 0,632420805 | -0,28 | 0,909329669 | -0,45 | 0,590123815 | -0,62 | 0,203657513 | -0,22 | 0,799135174 |
| Rnmt   | -0,68 | 0,179378159 | -0,15 | 0,888278235 | 0,91  | 0,207797844 | 1,16  | 0,191726739 | 0,35  | 0,765342998 |
| Rnmtl1 | -0,7  | 0,553764503 | 0,14  | 0,930983876 | 0,4   | 0,68845998  | 0,96  | 0,128164731 | 1,29  | 0,138263041 |
| Rnpc3  | -0,12 | 0,924561835 | -0,6  | 0,420485441 | -0,04 | 0,978207511 | 0,02  | 0,985580087 | 0,41  | 0,507412829 |

|         |       |             |       |             |       |             |       |             |       |             |
|---------|-------|-------------|-------|-------------|-------|-------------|-------|-------------|-------|-------------|
| Rnpep   | -0,15 | 0,784951771 | -0,04 | 0,956555856 | 0,28  | 0,660610212 | 0,59  | 0,104747217 | 0,35  | 0,488888835 |
| Rnpepl1 | -0,03 | 0,953324702 | -0,03 | 0,972505904 | -0,46 | 0,349860932 | 0,02  | 0,983166423 | 0,07  | 0,956610289 |
| Rnps1   | -0,17 | 0,785669218 | 0,1   | 0,862559271 | 0,19  | 0,79541037  | 0,44  | 0,201330771 | 0,01  | 0,989179767 |
| Rnu11   | 0,13  | 0,84241758  | 0,22  | 0,750160982 | -0,06 | 0,953951069 | -0,5  | 0,202877508 | 0,08  | 0,929312654 |
| Rnu12   | 0,16  | 0,718038014 | 0,33  | 0,410501758 | -0,07 | 0,916403684 | -0,01 | 0,979535553 | -0,04 | 0,957620856 |
| Rnu1a1  | 0,2   | 0,722444925 | 0     | 1           | -0,46 | 0,325974926 | -0,22 | 0,502823627 | 0,46  | 0,44321149  |
| Rnu3a   | 0,36  | 0,637411708 | 0,28  | 0,507347398 | 0,11  | 0,959990799 | -0,37 | 0,757705449 | 0,53  | 0,647739205 |
| Rnu5g   | 0,32  | 0,620554858 | 0,15  | 0,864363741 | -0,21 | 0,689700431 | 0,08  | 0,90213506  | -0,02 | 0,988516531 |
| Rnu7    | -0,21 | 0,78187924  | -0,05 | 0,923044405 | -0,11 | 0,903366838 | -0,03 | 0,962670023 | -0,2  | 0,796146369 |
| Rnu73b  | 0,69  | 0,783200207 | -1,01 | 0,674709201 | 0,99  | 0,625745801 | -0,39 | 0,84102185  | -0,65 | 0,80222716  |
| Rny1    | -0,02 | 0,98225675  | 0,47  | 0,627386884 | 0,15  | 0,907570167 | 0,77  | 0,117584986 | 0,55  | 0,46173543  |
| Rny3    | -0,36 | 0,298236836 | 0,2   | 0,74287552  | 0,51  | 0,465282583 | 0,79  | 0,07576801  | 0,25  | 0,788069697 |
| Robo1   | -1,23 | 0,369418071 | -2,81 | 0,138101221 | 2,74  | 0,012240129 | 2,85  | 0,110757273 | -0,37 | 0,847190413 |
| Robo2   | -0,11 | 0,907844906 | -0,41 | 0,725783826 | 0,33  | 0,590832576 | -0,44 | 0,677607825 | -0,75 | 0,439038071 |
| Robo3   | 0,29  | 0,59710379  | 0,22  | 0,74882322  | -0,12 | 0,910766724 | -2,48 | 0,025699992 | -0,33 | 0,759432231 |
| Robo4   | -0,27 | 0,450477561 | -0,17 | 0,673542391 | 0,03  | 0,9728699   | -0,01 | 0,984283741 | -0,42 | 0,382239908 |
| Rock1   | 0,31  | 0,427486466 | 0,08  | 0,906592861 | -0,06 | 0,958851839 | -0,05 | 0,948609656 | 0,64  | 0,286600165 |
| Rock2   | 0,25  | 0,580784638 | 0,29  | 0,664787536 | -0,48 | 0,474169312 | 0,27  | 0,447310044 | 0,57  | 0,221488709 |
| Rogdi   | -0,82 | 0,157941498 | -0,52 | 0,491478704 | 0,26  | 0,760721308 | 0,3   | 0,618209904 | -0,58 | 0,199163495 |
| Rom1    | -0,46 | 0,652819827 | 0,26  | 0,732847182 | 0,14  | 0,898382247 | -0,35 | 0,343652337 | -0,45 | 0,555509871 |
| Romo1   | -0,14 | 0,769299413 | -0,32 | 0,556617566 | 0,23  | 0,665034403 | 0,47  | 0,298021209 | 0,03  | 0,978548155 |
| Ropn1   | -0,34 | 0,624941638 | 0,11  | 0,926178529 | -0,13 | 0,83346229  | 0,29  | 0,575878651 | -0,14 | 0,907798813 |
| Ropn1l  | 0,28  | 0,700672647 | 0,22  | 0,828498885 | -0,1  | 0,932577939 | 0,81  | 0,212687534 | 0,04  | 0,978604922 |
| Ror1    | 0,31  | 0,80226019  | -0,8  | 0,717881636 | -0,15 | 0,930549237 | -0,74 | 0,592457782 | -0,48 | 0,412253278 |
| Ror2    | 0,06  | 0,953702758 | -0,2  | 0,695689103 | -0,09 | 0,960677449 | 0,08  | 0,949239972 | -0,2  | 0,865289484 |
| Rora    | 0,6   | 0,537459076 | 0,65  | 0,581340358 | -0,98 | 0,04780109  | -1,32 | 0,085864321 | 0,74  | 0,253125485 |
| Rorb    | 0,13  | 0,881155133 | -0,03 | 0,992017084 | 0,37  | 0,56948206  | 0,12  | 0,778736686 | 0,04  | 0,973381854 |
| Rorc    | 0,25  | 0,717407143 | 0,12  | 0,932292974 | -0,04 | 0,976092199 | -1,35 | 0,243228382 | -0,47 | 0,773401088 |
| Ros1    | -0,4  | 0,343457563 | -0,41 | 0,574304911 | -0,01 | 0,992950363 | 0,17  | 0,665234661 | -0,21 | 0,733190569 |
| Rp1     | -0,09 | 0,921898929 | 0,25  | 0,785627627 | 0,15  | 0,815567598 | 0,22  | 0,665063395 | 0,35  | 0,673106597 |
| Rp1l1   | -0,26 | 0,642644988 | -0,57 | 0,470112519 | -0,34 | 0,734556263 | 0,06  | 0,914828446 | 0,04  | 0,965244101 |
| Rp2     | 0,63  | 0,27550648  | 0,17  | 0,851085879 | 0,85  | 0,305294072 | 0,96  | 0,110657093 | 0,43  | 0,558284622 |
| Rp9     | 0,01  | 0,985279076 | -0,2  | 0,761404909 | 0,19  | 0,748973263 | 0,14  | 0,832618199 | -0,14 | 0,844265172 |
| Rpa1    | -0,51 | 0,541645792 | -1,36 | 0,446315327 | 1,29  | 0,109795819 | 0,61  | 0,738303576 | -0,21 | 0,900436874 |
| Rpa2    | -0,35 | 0,779331628 | -1,05 | 0,325242663 | 0,73  | 0,423084251 | 0,61  | 0,473035898 | 0,35  | 0,734042268 |



|          |       |             |       |             |       |             |       |             |       |             |
|----------|-------|-------------|-------|-------------|-------|-------------|-------|-------------|-------|-------------|
| Rpa3     | 0,28  | 0,757032046 | -0,6  | 0,222998638 | 0,56  | 0,386741083 | 0,38  | 0,461824013 | -0,47 | 0,39635452  |
| Rpain    | 0,45  | 0,343457563 | 0,22  | 0,712939097 | 0,45  | 0,622546805 | -1,07 | 0,069176122 | -0,03 | 0,978604922 |
| Rpap1    | -0,32 | 0,686076441 | -0,15 | 0,708726036 | 0,04  | 0,969476711 | 0,24  | 0,4729993   | -0,11 | 0,867093565 |
| Rpap2    | -0,08 | 0,94727537  | -0,12 | 0,940046211 | -0,58 | 0,468633043 | -0,15 | 0,896517278 | -1    | 0,053907225 |
| Rpap3    | -0,32 | 0,549437855 | -0,13 | 0,859954464 | 0,6   | 0,532626868 | 0,59  | 0,17782866  | 0,04  | 0,976343903 |
| Rpe      | -0,18 | 0,856887426 | -0,42 | 0,641035273 | -0,01 | 0,997268369 | 1,48  | 0,056854036 | 0,95  | 0,136515453 |
| Rpe65    | -0,02 | 0,973255755 | -0,17 | 0,766425161 | 0,23  | 0,666715303 | 0,31  | 0,523669806 | 0,15  | 0,892386863 |
| Rpf1     | 0,01  | 0,980705839 | -0,17 | 0,746439988 | 0,04  | 0,973732268 | 0,64  | 0,376628904 | 0,57  | 0,450543672 |
| Rpf2     | 0,05  | 0,975949545 | -0,1  | 0,954948291 | 0,47  | 0,657277431 | 2,06  | 0,035837218 | 1,18  | 0,137394562 |
| Rpgr     | -0,39 | 0,7914678   | -0,57 | 0,708684603 | 0,81  | 0,374827031 | 0,75  | 0,58265052  | -0,05 | 0,980961333 |
| Rpgrip1  | 0,3   | 0,602487475 | 0,28  | 0,78209856  | -0,06 | 0,952518202 | -0,59 | 0,223741468 | -0,87 | 0,176186731 |
| Rpgrip1l | -0,26 | 0,840909921 | -0,25 | 0,798091107 | 0,14  | 0,887085755 | 0,83  | 0,099201351 | 0,03  | 0,980945466 |
| Rph3a    | 0,05  | 0,914090929 | 0,34  | 0,384803204 | -0,07 | 0,935168506 | -0,09 | 0,899003207 | -0,16 | 0,900126162 |
| Rph3al   | -0,19 | 0,801386084 | -0,23 | 0,73592525  | -0,08 | 0,968067891 | -2,01 | 0,004579459 | -0,95 | 0,083757912 |
| Rpia     | -0,12 | 0,921801847 | 0,12  | 0,927582737 | 0,36  | 0,570233796 | 0,07  | 0,942259386 | -0,28 | 0,694233384 |
| Rpl10    | 0,19  | 0,64776317  | 0,05  | 0,923044405 | -0,2  | 0,809062815 | 0,21  | 0,539704702 | 0,17  | 0,81431215  |
| Rpl10a   | -0,24 | 0,810101389 | -0,25 | 0,593236789 | -0,18 | 0,791876238 | 0,06  | 0,942937835 | -0,22 | 0,827532593 |
| Rpl10l   | 0,21  | 0,794953851 | 0,11  | 0,916255958 | 0,02  | 0,978571392 | 0,19  | 0,77372709  | 0,47  | 0,524708288 |
| Rpl12    | 0,2   | 0,776721795 | -0,01 | 0,990294709 | 0,12  | 0,868798569 | 0,35  | 0,251846723 | -0,01 | 0,992406971 |
| Rpl13    | 0,03  | 0,955200574 | 0     | 0,998237793 | 0,07  | 0,91427599  | 0,53  | 0,163333343 | 0,08  | 0,910301996 |
| Rpl14    | -0,12 | 0,798244283 | -0,22 | 0,65537587  | 0,58  | 0,382042571 | 0,86  | 0,136397086 | 0,17  | 0,830405539 |
| Rpl17    | -0,07 | 0,91664986  | -0,06 | 0,938991098 | 0,06  | 0,949039966 | 0,4   | 0,276738662 | 0,02  | 0,984125319 |
| Rpl18    | 0,03  | 0,959683262 | -0,04 | 0,934602811 | 0,13  | 0,816374369 | 0,38  | 0,296364727 | 0,17  | 0,787221268 |
| Rpl18a   | 0,1   | 0,927899995 | -0,1  | 0,916255958 | -0,3  | 0,679895309 | 0,25  | 0,572854044 | -0,03 | 0,979456872 |
| Rpl19    | 0,4   | 0,421029929 | -0,12 | 0,894563348 | -0,13 | 0,865545635 | 0,6   | 0,219117195 | 0,03  | 0,978113807 |
| Rpl21    | -0,08 | 0,893283341 | 0,01  | 0,996259587 | -0,08 | 0,932577939 | 0,35  | 0,313218975 | 0,13  | 0,876927228 |
| Rpl22    | -0,08 | 0,935737948 | -0,4  | 0,762512516 | 0,08  | 0,946777487 | 0,1   | 0,932512513 | 0,37  | 0,60110185  |
| Rpl22l1  | 0,17  | 0,769299413 | 0,1   | 0,849087801 | 0,04  | 0,965703516 | -0,15 | 0,679463308 | 0,05  | 0,959398085 |
| Rpl23    | -0,35 | 0,546019769 | -0,14 | 0,883145635 | -0,08 | 0,929929334 | -0,31 | 0,68319623  | -0,09 | 0,92741476  |
| Rpl23a   | 0,06  | 0,892682862 | -0,01 | 0,993789602 | 0,01  | 0,992510518 | 0,46  | 0,20381376  | -0,01 | 0,985982505 |
| Rpl24    | 0,06  | 0,948376096 | -0,18 | 0,775155136 | -0,09 | 0,929425752 | 0,36  | 0,708430738 | 0,05  | 0,975441362 |
| Rpl27    | -0,22 | 0,546065357 | -0,03 | 0,956217122 | -0,25 | 0,856046789 | 0,58  | 0,203580306 | 0,07  | 0,934344891 |
| Rpl28    | 0     | 0,99911508  | 0,01  | 0,989985353 | 0,07  | 0,906097666 | 0,36  | 0,232146833 | -0,09 | 0,889954957 |
| Rpl29    | -0,16 | 0,764189777 | -0,14 | 0,863064855 | 0,37  | 0,48129545  | 0,84  | 0,08638505  | 0,11  | 0,876747929 |
| Rpl3     | -0,23 | 0,74764092  | -0,14 | 0,832841509 | 0,27  | 0,762462025 | 0,5   | 0,318746696 | 0,3   | 0,759994637 |

|         |       |             |       |             |       |             |       |             |       |             |
|---------|-------|-------------|-------|-------------|-------|-------------|-------|-------------|-------|-------------|
| Rpl30   | -0,49 | 0,617452158 | -0,26 | 0,738199172 | 0,11  | 0,906097666 | 1,25  | 0,177452749 | 0,39  | 0,759432231 |
| Rpl31   | -0,07 | 0,890205603 | -0,01 | 0,995205602 | 0,05  | 0,950846671 | 0,53  | 0,148726172 | 0,2   | 0,766559546 |
| Rpl32   | 0,23  | 0,568479459 | 0,01  | 0,991372617 | 0,1   | 0,884553705 | 0,5   | 0,121231601 | -0,06 | 0,942402665 |
| Rpl32l  | 0,05  | 0,905410816 | -0,01 | 0,996105203 | 0,02  | 0,989491273 | 0,28  | 0,380754557 | 0,12  | 0,858534673 |
| Rpl34   | -0,15 | 0,84900712  | -0,51 | 0,304034247 | 0,22  | 0,833890488 | 1,11  | 0,091159146 | -0,07 | 0,957130917 |
| Rpl35a  | 0,14  | 0,737827604 | 0,09  | 0,851610126 | 0,02  | 0,984778342 | 0,19  | 0,665316336 | 0,13  | 0,861977667 |
| Rpl36   | 0,15  | 0,761457464 | 0,26  | 0,740618526 | 0,03  | 0,981728622 | 0,27  | 0,615181679 | 0,42  | 0,419557334 |
| Rpl36a  | -0,12 | 0,849867944 | 0,12  | 0,849511429 | 0,12  | 0,917672398 | 1,08  | 0,058185936 | 0,23  | 0,739121045 |
| Rpl36al | 0,16  | 0,714662474 | 0,1   | 0,853162838 | 0,16  | 0,798348773 | 0,58  | 0,129154295 | 0,22  | 0,698115018 |
| Rpl37   | -0,27 | 0,604692463 | -0,11 | 0,883145635 | 0,41  | 0,343594254 | 0,98  | 0,074454367 | 0,24  | 0,699671375 |
| Rpl37a  | 0,03  | 0,971479319 | 0,04  | 0,975639191 | 0,23  | 0,727131283 | 0,05  | 0,943846121 | -0,41 | 0,476496602 |
| Rpl38   | -0,02 | 0,971245076 | -0,11 | 0,804868131 | 0,15  | 0,803963753 | 0,56  | 0,103101726 | -0,03 | 0,972590168 |
| Rpl39l  | 0,65  | 0,577809864 | -0,01 | 0,999210601 | 0,08  | 0,947034823 | 0,61  | 0,207857778 | 0,18  | 0,849560772 |
| Rpl3l   | -1,06 | 0,074890017 | -0,19 | 0,776335661 | 0,61  | 0,530318769 | 0,52  | 0,215252719 | 0,58  | 0,171064668 |
| Rpl4    | -0,06 | 0,896597516 | 0     | 1           | 0,27  | 0,644305155 | 0,34  | 0,332822631 | 0,02  | 0,979456872 |
| Rpl41   | -0,2  | 0,660719019 | -0,19 | 0,754578715 | -0,37 | 0,665554804 | 0,5   | 0,30684572  | 0,33  | 0,685491271 |
| Rpl6    | -0,55 | 0,711953295 | -0,71 | 0,362527655 | -0,34 | 0,847688308 | 0,44  | 0,800853287 | 0,66  | 0,720844381 |
| Rpl7    | -0,26 | 0,53662401  | 0,01  | 0,990052916 | -0,24 | 0,659903531 | -0,06 | 0,898801714 | -0,15 | 0,814158081 |
| Rpl7a   | -0,02 | 0,975695577 | 0,01  | 0,987118541 | 0,15  | 0,764354315 | 0,62  | 0,087185242 | 0,23  | 0,650292523 |
| Rpl7l1  | -0,49 | 0,644876795 | 0,05  | 0,965147491 | 0,35  | 0,91351908  | 0,36  | 0,623678563 | 0,09  | 0,940878193 |
| Rpl8    | -0,09 | 0,858977038 | 0,07  | 0,912535732 | 0,3   | 0,475944471 | 0,12  | 0,829478092 | 0,02  | 0,983514531 |
| Rpl9    | 0,09  | 0,892124736 | 0,4   | 0,582976316 | -0,15 | 0,85383827  | 0     | 1           | 0,26  | 0,830415283 |
| Rplp0   | -0,23 | 0,679989164 | -0,21 | 0,824372931 | -0,03 | 0,973732268 | 1,13  | 0,108163501 | 0,55  | 0,526122398 |
| Rplp1   | 0,1   | 0,827552513 | 0,04  | 0,954539134 | 0,22  | 0,642464188 | 0,37  | 0,25955285  | 0,11  | 0,868167014 |
| Rpn1    | -0,33 | 0,559636965 | -0,18 | 0,703929085 | 0,35  | 0,595253534 | 0,31  | 0,426488138 | 0,17  | 0,830788023 |
| Rpn2    | -0,16 | 0,737939986 | -0,1  | 0,807292005 | 0,68  | 0,268067551 | 0,23  | 0,639765346 | 0,05  | 0,953297732 |
| Rpp14   | -0,82 | 0,244269955 | -0,08 | 0,966539075 | -0,18 | 0,848462153 | -0,27 | 0,474127813 | -0,48 | 0,442579293 |
| Rpp21   | 0,75  | 0,251014805 | 0,27  | 0,849511429 | -0,73 | 0,461720231 | -0,41 | 0,590922934 | 0,34  | 0,594989249 |
| Rpp25   | -0,24 | 0,656034838 | -0,01 | 0,997700959 | -0,44 | 0,630836381 | 0,19  | 0,813667931 | -0,06 | 0,948027777 |
| Rpp25l  | -0,36 | 0,499510828 | -0,21 | 0,612662008 | 0,18  | 0,852306527 | 0,28  | 0,411076198 | -0,1  | 0,921263496 |
| Rpp30   | 0,2   | 0,791517531 | -0,24 | 0,807175471 | 0,62  | 0,374422909 | 0,17  | 0,81439444  | -0,13 | 0,936841734 |
| Rpp38   | -0,45 | 0,610509826 | -0,17 | 0,892260328 | 0,39  | 0,747599709 | 0,9   | 0,298836375 | -0,46 | 0,817563348 |
| Rpp40   | -0,87 | 0,116800904 | -0,57 | 0,589051408 | 0,24  | 0,776927784 | 0,58  | 0,523255995 | 0,42  | 0,682139425 |
| Rpph1   | 0,11  | 0,875464288 | 0,24  | 0,63571464  | -0,35 | 0,638965268 | -0,56 | 0,111545975 | 0,1   | 0,886027227 |
| Rprd1a  | -0,03 | 0,98225675  | 0,02  | 0,98954147  | 0,01  | 0,993389213 | -0,62 | 0,447310044 | -0,42 | 0,697336851 |

|            |       |             |       |             |       |             |       |             |       |             |
|------------|-------|-------------|-------|-------------|-------|-------------|-------|-------------|-------|-------------|
| Rprd1b     | -0,48 | 0,443580998 | -0,48 | 0,297250343 | 0,02  | 0,989491273 | -0,16 | 0,690664654 | 0     | 0,99753219  |
| Rprd2      | 0     | 0,997842309 | -0,06 | 0,949561659 | -0,18 | 0,839669459 | -0,31 | 0,607543815 | -0,12 | 0,884248437 |
| Rprl1      | 0,15  | 0,784032994 | -0,04 | 0,954307545 | -0,17 | 0,791790984 | 0,71  | 0,146839477 | -0,01 | 0,993482152 |
| Rprl2      | 0,31  | 0,699278486 | 0,18  | 0,730338344 | -0,43 | 0,591069778 | -0,18 | 0,69151142  | 0,24  | 0,726042963 |
| Rprm       | -0,02 | 0,972444718 | -0,09 | 0,846860088 | 0,1   | 0,917981605 | 0,29  | 0,556282326 | 0,03  | 0,979392852 |
| Rprml      | 0,1   | 0,828240142 | 0,01  | 0,997700959 | -0,22 | 0,813180174 | 0,07  | 0,857910103 | -0,02 | 0,985255247 |
| Rps10      | 0,16  | 0,780020938 | 0,04  | 0,93569246  | 0,11  | 0,883534784 | 0,69  | 0,1995524   | 0,27  | 0,703320806 |
| Rps11      | -0,39 | 0,505859046 | -0,4  | 0,538702745 | 0,31  | 0,647014995 | 1,36  | 0,048295711 | -0,02 | 0,980945466 |
| Rps11-ps1  | 0,4   | 0,343763562 | 0,24  | 0,520493846 | 0,05  | 0,973186233 | -0,52 | 0,4272539   | 0,41  | 0,549785483 |
| Rps12      | 0,07  | 0,866550319 | 0,01  | 0,984784749 | 0,05  | 0,95081702  | 0,29  | 0,339886807 | -0,03 | 0,97206128  |
| Rps14      | 0,33  | 0,414039536 | 0,73  | 0,200336704 | -0,17 | 0,816710945 | -0,09 | 0,908862851 | 0,11  | 0,916204519 |
| Rps15      | 0,38  | 0,617280733 | 0,45  | 0,587454369 | 0,02  | 0,993379272 | -0,99 | 0,104613149 | -0,23 | 0,738901324 |
| Rps15a-ps4 | 0,26  | 0,714662474 | 0,5   | 0,277253387 | -0,4  | 0,332958465 | 0     | 0,998303607 | 0,34  | 0,587735967 |
| Rps15a-ps6 | 0,62  | 0,487185115 | -0,03 | 0,978904487 | -0,43 | 0,43825018  | 0,07  | 0,967047406 | 0,44  | 0,844265172 |
| Rps18      | 0,32  | 0,606922012 | 0,23  | 0,596827853 | -0,07 | 0,937346852 | -0,12 | 0,837461612 | 0,39  | 0,536721752 |
| Rps19bp1   | -0,11 | 0,892195063 | -0,1  | 0,882847123 | 0,39  | 0,402779579 | 0,41  | 0,353290884 | 0,07  | 0,938825649 |
| Rps19-ps3  | -0,15 | 0,714662474 | 0,01  | 0,997700959 | 0,02  | 0,990836784 | 0,48  | 0,469495727 | -0,2  | 0,869517909 |
| Rps2       | 0,04  | 0,957427783 | -0,24 | 0,539700767 | 0,17  | 0,847402011 | 0,2   | 0,688429263 | -0,23 | 0,814032603 |
| Rps21      | 0,02  | 0,965991176 | 0,13  | 0,842793123 | 0,22  | 0,643900875 | 0,28  | 0,521617569 | 0,03  | 0,972802731 |
| Rps23      | -0,09 | 0,906075104 | -0,04 | 0,948314657 | -0,21 | 0,660920525 | 0,35  | 0,332781724 | -0,12 | 0,890833196 |
| Rps24      | -0,03 | 0,957398577 | -0,14 | 0,781046971 | -0,1  | 0,908030225 | 0,75  | 0,141794466 | 0,26  | 0,682150194 |
| Rps25      | -0,21 | 0,664803559 | -0,12 | 0,790939978 | 0,45  | 0,529670332 | 1,14  | 0,026254672 | 0,02  | 0,983469081 |
| Rps26      | 0,55  | 0,536848116 | 0,51  | 0,528720196 | 0,01  | 0,997581017 | 1,26  | 0,32110346  | 0,51  | 0,711067372 |
| Rps27      | -0,03 | 0,972701787 | -0,08 | 0,849511429 | -0,51 | 0,450947936 | 0,37  | 0,27932245  | 0,51  | 0,334365666 |
| Rps27a     | 0,13  | 0,795851623 | 0,07  | 0,896322235 | -0,45 | 0,629213397 | 0,05  | 0,911343784 | 0,11  | 0,87304124  |
| Rps27l     | 0,04  | 0,944311955 | -0,36 | 0,402879264 | 0,15  | 0,911506558 | 0,63  | 0,087979099 | 0,03  | 0,975441362 |
| Rps28      | -0,47 | 0,691756594 | 0,4   | 0,373555617 | -0,38 | 0,777810365 | 0,76  | 0,19225115  | -0,12 | 0,930302738 |
| Rps29      | -0,02 | 0,976574175 | -0,08 | 0,862088357 | 0,04  | 0,962052518 | 0,08  | 0,917426171 | -0,16 | 0,840036408 |
| Rps3       | -0,01 | 0,9852886   | 0,31  | 0,583200444 | 0,04  | 0,96858449  | 0,37  | 0,29633576  | 0,32  | 0,545532754 |
| Rps3a1     | 0,04  | 0,930372928 | -0,04 | 0,954324398 | -0,02 | 0,991255289 | 0,37  | 0,36184569  | 0,25  | 0,649846438 |
| Rps4l      | -0,32 | 0,485159825 | -0,5  | 0,426168855 | -0,1  | 0,923258105 | 1     | 0,093785342 | -0,54 | 0,450543672 |
| Rps4x      | -0,02 | 0,975179875 | -0,03 | 0,959209847 | 0,05  | 0,943788892 | 0,23  | 0,478731976 | -0,08 | 0,906338603 |
| Rps5       | 0,07  | 0,892823025 | 0,03  | 0,959392342 | 0,16  | 0,770315793 | 0,35  | 0,300618827 | -0,02 | 0,983613958 |
| Rps6       | -0,04 | 0,933085033 | 0,01  | 0,994148616 | 0,04  | 0,947460329 | 0,13  | 0,703608692 | 0,08  | 0,907903208 |
| Rps6ka1    | -0,6  | 0,424529546 | -0,02 | 0,988550087 | 0,62  | 0,426620673 | -0,47 | 0,348518558 | -0,56 | 0,307250018 |

|         |       |             |       |             |       |             |       |             |       |             |
|---------|-------|-------------|-------|-------------|-------|-------------|-------|-------------|-------|-------------|
| Rps6ka2 | -0,69 | 0,097625832 | -1,01 | 0,116326024 | 0,72  | 0,232806399 | 1,33  | 0,062073395 | -0,62 | 0,380694619 |
| Rps6ka3 | -0,09 | 0,898572877 | 0,14  | 0,828498885 | -0,13 | 0,814661255 | 0,6   | 0,319309383 | 0,76  | 0,199537078 |
| Rps6ka4 | -0,12 | 0,781674999 | -0,3  | 0,639698557 | 0,1   | 0,921119153 | 0,27  | 0,657493591 | 0,36  | 0,637300707 |
| Rps6ka5 | -0,17 | 0,883785501 | -0,7  | 0,481105963 | 0,61  | 0,453760401 | -1,54 | 0,120688974 | -0,18 | 0,898448235 |
| Rps6ka6 | 0,2   | 0,808764987 | -0,4  | 0,613344994 | -0,21 | 0,818840027 | 0,25  | 0,638788263 | -0,34 | 0,48247035  |
| Rps6kb1 | -0,63 | 0,428049245 | -0,34 | 0,561035617 | -0,25 | 0,706842882 | 0,24  | 0,812244154 | 0,08  | 0,96738578  |
| Rps6kb2 | -0,14 | 0,867243066 | -0,12 | 0,824372931 | -0,47 | 0,527929204 | 0,01  | 0,991490293 | -0,03 | 0,971058066 |
| Rps6kc1 | -0,05 | 0,971245076 | 0,29  | 0,847885195 | -0,17 | 0,870377336 | -0,12 | 0,920521047 | -0,13 | 0,934745577 |
| Rps6kl1 | -0,51 | 0,360756557 | 0,42  | 0,625401956 | -0,15 | 0,891500876 | -0,59 | 0,3550569   | -0,1  | 0,926627035 |
| Rps7    | -0,11 | 0,905414735 | 0,04  | 0,983071427 | 0,22  | 0,907570167 | 1,62  | 0,112367227 | 0,09  | 0,951236192 |
| Rps8    | -0,08 | 0,871580532 | 0,02  | 0,982332924 | 0,02  | 0,984813172 | 0,64  | 0,167815366 | 0,14  | 0,835833283 |
| Rps9    | -0,12 | 0,761457464 | -0,1  | 0,842663656 | 0,19  | 0,68898979  | 0,49  | 0,210689207 | -0,12 | 0,84736494  |
| Rpsa    | -0,13 | 0,731132693 | -0,08 | 0,889346096 | 0,3   | 0,628142669 | 0,74  | 0,118739789 | 0,13  | 0,861195094 |
| Rptn    | -0,09 | 0,907932476 | 0,12  | 0,883843639 | -0,12 | 0,853804766 | 0     | 0,997771107 | -0,31 | 0,777281438 |
| Rptor   | -0,06 | 0,939317944 | -0,27 | 0,476383101 | 0,15  | 0,846458227 | 0,45  | 0,171114968 | -0,19 | 0,731527639 |
| Rptoros | 0,22  | 0,747835117 | -0,13 | 0,775155136 | 0,01  | 0,994874954 | -0,06 | 0,920668388 | 0,09  | 0,925858284 |
| Rpusd1  | 0,01  | 0,995438679 | -0,05 | 0,954948291 | 0,59  | 0,501664412 | 0,07  | 0,960514089 | -0,04 | 0,980945466 |
| Rpusd2  | -0,19 | 0,857394916 | -0,09 | 0,945604435 | -0,21 | 0,864411302 | 0,12  | 0,754339703 | -0,12 | 0,862867603 |
| Rpusd3  | -0,1  | 0,883674476 | -0,2  | 0,754578715 | 0,01  | 0,99158537  | 0,69  | 0,288372966 | 0,05  | 0,973381854 |
| Rpusd4  | 0,08  | 0,923749064 | 0,18  | 0,80766136  | 0,21  | 0,824279952 | -0,22 | 0,714428022 | -0,26 | 0,628999683 |
| Rqcd1   | -0,72 | 0,139492533 | -0,41 | 0,456156525 | 0,35  | 0,658102223 | 0,45  | 0,399472679 | -0,63 | 0,236342423 |
| Rrad    | -0,57 | 0,250472061 | 0,87  | 0,35496087  | -0,59 | 0,324321658 | -1,41 | 0,012492269 | 0,27  | 0,677222415 |
| Rraga   | -0,29 | 0,642618049 | 0,11  | 0,81976908  | 0,81  | 0,276937905 | -0,02 | 0,967352728 | -0,2  | 0,718299139 |
| Rragb   | 0,36  | 0,730258012 | 0,51  | 0,402975324 | -0,31 | 0,735468851 | -2,57 | 0,004264722 | -1,72 | 0,016505887 |
| Rragc   | -0,12 | 0,892124736 | 0     | 1           | -0,1  | 0,956445791 | 0,2   | 0,704798975 | 0,19  | 0,854962193 |
| Rragd   | 0,4   | 0,613347532 | 0,5   | 0,491568214 | -0,34 | 0,57717258  | -0,63 | 0,300900254 | 0,43  | 0,559132684 |
| Rras    | 0,13  | 0,757032046 | 0,06  | 0,89034555  | 0,14  | 0,853040826 | -0,37 | 0,296435377 | -0,03 | 0,975200543 |
| Rras2   | 0,29  | 0,573661766 | 0,07  | 0,949339329 | 0,13  | 0,902672106 | -0,11 | 0,90213506  | -0,03 | 0,984125319 |
| Rrbp1   | -0,42 | 0,263401001 | -0,14 | 0,775483469 | 0,39  | 0,366234911 | 0,58  | 0,17421446  | 0,15  | 0,810276195 |
| Rreb1   | 0,09  | 0,878236686 | 0,02  | 0,982912884 | 0,06  | 0,955984004 | 0,03  | 0,970919681 | 0,26  | 0,662728263 |
| Rrh     | 0,23  | 0,694699901 | -0,14 | 0,88928164  | -0,66 | 0,158982279 | 0,28  | 0,656261393 | 0,03  | 0,979456872 |
| Rrm1    | -1,29 | 0,123854815 | -1,14 | 0,193249884 | 1,34  | 0,009294792 | 0,6   | 0,163529439 | -0,61 | 0,166595171 |
| Rrm2    | -0,85 | 0,239601221 | -1,31 | 0,192998361 | 0,88  | 0,078062173 | 2,06  | 0,027423594 | -0,11 | 0,947733697 |
| Rrm2b   | 0,13  | 0,905414735 | -0,16 | 0,903300225 | -0,59 | 0,369527192 | -0,81 | 0,084311172 | -0,17 | 0,862867603 |
| Rrn3    | -0,59 | 0,351718017 | -0,39 | 0,585443341 | 0,53  | 0,575625802 | 0,28  | 0,711034151 | 0,09  | 0,939127163 |

|          |       |             |       |             |       |             |       |             |       |             |
|----------|-------|-------------|-------|-------------|-------|-------------|-------|-------------|-------|-------------|
| Rrnad1   | -0,43 | 0,419591944 | 0,13  | 0,801787438 | 0,16  | 0,904239687 | -0,47 | 0,611632616 | 0,15  | 0,918529364 |
| Rrp1     | -0,31 | 0,455714377 | -0,14 | 0,868234125 | 0,24  | 0,643853175 | 0,02  | 0,980890499 | 0,14  | 0,910829332 |
| Rrp12    | -0,66 | 0,180356049 | -0,39 | 0,642541818 | 0,62  | 0,37721644  | 1,63  | 0,03890508  | 0,65  | 0,265632231 |
| Rrp15    | -1,05 | 0,184197628 | -0,64 | 0,277253387 | 0,67  | 0,1135716   | 1,16  | 0,031382387 | 0,02  | 0,980945466 |
| Rrp1b    | -0,34 | 0,613990129 | -0,59 | 0,324240927 | 0,12  | 0,916613217 | 0,4   | 0,279561989 | -0,17 | 0,882032329 |
| Rrp36    | -0,06 | 0,929262949 | 0,04  | 0,95021587  | -0,02 | 0,978012085 | -0,36 | 0,506415716 | -0,13 | 0,865258929 |
| Rrp7a    | -0,28 | 0,485159825 | 0,01  | 0,993789602 | -0,06 | 0,927950027 | 0,31  | 0,651440131 | 0,15  | 0,878966527 |
| Rrp8     | -0,81 | 0,234876482 | -0,28 | 0,723353163 | 0,36  | 0,740940257 | 0,78  | 0,314372916 | -0,35 | 0,721622418 |
| Rrp9     | -0,19 | 0,696927965 | -0,11 | 0,807674009 | -0,31 | 0,665034403 | 0,03  | 0,958889858 | -0,24 | 0,738853855 |
| Rrs1     | 0,02  | 0,982877855 | 0,14  | 0,72665096  | 0,26  | 0,654328013 | 0,57  | 0,174313619 | 0,05  | 0,954694993 |
| Rs1      | 0,26  | 0,59037412  | -0,28 | 0,731503149 | -0,29 | 0,599364835 | 0,19  | 0,800853287 | -0,23 | 0,70401038  |
| Rsad1    | -0,49 | 0,279941758 | 0,19  | 0,736614692 | -0,38 | 0,436827113 | -0,49 | 0,544693962 | -0,33 | 0,731050468 |
| Rsad2    | 0,28  | 0,7494877   | 0,87  | 0,175532022 | -1,03 | 0,077626926 | -0,89 | 0,080778307 | 0,95  | 0,05100134  |
| Rsb1     | -0,19 | 0,807612551 | 0,32  | 0,748605628 | 0,56  | 0,502424965 | -0,02 | 0,987247308 | 0,26  | 0,718653576 |
| Rsb11    | 0,59  | 0,401159049 | 0,09  | 0,85154774  | -0,12 | 0,925288956 | -0,15 | 0,839333217 | 0,5   | 0,395115041 |
| Rsc1a1   | -0,32 | 0,936051646 | -0,79 | 0,806262668 | 2,18  | 0,127107543 | 1,09  | 0,593443184 | 1,16  | 0,68987325  |
| Rsf1     | -0,05 | 0,954746388 | -0,2  | 0,889346096 | -0,09 | 0,955984004 | -0,18 | 0,85301747  | -0,17 | 0,812549515 |
| Rsf1os1  | -0,17 | 0,773711275 | 0,05  | 0,946885634 | -0,18 | 0,760930184 | 0,01  | 0,988205241 | -0,02 | 0,980961333 |
| Rsf1os2  | 0,09  | 0,869565514 | -0,36 | 0,677440358 | -0,24 | 0,711472088 | 0,29  | 0,597350222 | 0,77  | 0,326307411 |
| Rsg1     | 0,02  | 0,98456417  | 0,43  | 0,615288453 | 0,12  | 0,888921789 | -0,74 | 0,321629009 | -0,62 | 0,525188239 |
| Rsl1     | -0,57 | 0,814775585 | 0,49  | 0,619501651 | 1,18  | 0,444017304 | -0,09 | 0,942739047 | 0,89  | 0,565817768 |
| Rsl1d1   | -0,24 | 0,666820752 | -0,03 | 0,950314568 | 0,39  | 0,624087446 | 0,59  | 0,163333343 | 0,15  | 0,828280059 |
| Rsl24d1  | -0,11 | 0,869565514 | 0,24  | 0,628604582 | 0,42  | 0,777417583 | 0,84  | 0,378102359 | 0,59  | 0,579739537 |
| Rslcan18 | 0,21  | 0,728643996 | -0,44 | 0,620625308 | -0,47 | 0,643853175 | 0,38  | 0,452631406 | 0,06  | 0,968130547 |
| Rsph1    | -0,06 | 0,932531737 | -0,17 | 0,916247917 | 0,31  | 0,712697139 | 0,21  | 0,814810741 | -0,29 | 0,665063852 |
| Rsph10b  | 0,12  | 0,925510521 | -0,36 | 0,424068004 | -0,82 | 0,487799104 | -0,66 | 0,591978406 | -0,92 | 0,42105078  |
| Rsph14   | 0,14  | 0,900211042 | -0,14 | 0,809683705 | -0,44 | 0,412103362 | 0,55  | 0,110664023 | 0,11  | 0,887392561 |
| Rsph3b   | -0,08 | 0,928103232 | 0,1   | 0,924057544 | -0,47 | 0,534543192 | 0,74  | 0,42854479  | -0,29 | 0,840531579 |
| Rsph4a   | -0,03 | 0,975949545 | 0,21  | 0,817110093 | 0,23  | 0,765490406 | 0,51  | 0,412205005 | -0,03 | 0,979392852 |
| Rsph6a   | -0,08 | 0,936611783 | 0,29  | 0,803629137 | -0,6  | 0,320972076 | -0,06 | 0,908141892 | 0,02  | 0,982175252 |
| Rsph9    | 0,25  | 0,66331039  | 0,41  | 0,432910866 | 0,01  | 0,991568687 | -2,15 | 0,007876985 | -0,78 | 0,140018656 |
| Rspo1    | 0,16  | 0,842189508 | 0,21  | 0,852461907 | -0,27 | 0,715497532 | 0,1   | 0,805169421 | -0,09 | 0,911850421 |
| Rspo2    | 0,01  | 0,994910518 | 0     | 1           | 0,05  | 0,960677449 | -0,2  | 0,520204778 | 0,14  | 0,844022821 |
| Rspo3    | -0,56 | 0,427971395 | -0,1  | 0,86297915  | -0,5  | 0,600679499 | -0,6  | 0,22355169  | 0,28  | 0,74303882  |
| Rspo4    | -0,18 | 0,768809729 | -0,05 | 0,956555856 | 0,07  | 0,944468902 | 0,18  | 0,656492305 | -0,56 | 0,287590871 |

|         |       |             |       |             |       |             |       |             |       |             |
|---------|-------|-------------|-------|-------------|-------|-------------|-------|-------------|-------|-------------|
| Rspry1  | 0,16  | 0,814444163 | -0,03 | 0,970020205 | 0,17  | 0,83346229  | -0,03 | 0,967866794 | -0,16 | 0,825680274 |
| Rsrc1   | -0,16 | 0,850491134 | -0,07 | 0,934907409 | 1,09  | 0,227890614 | 1,03  | 0,179012087 | 0,17  | 0,899825706 |
| Rsrc2   | -0,16 | 0,764288636 | 0,17  | 0,804576975 | 0     | 0,999931921 | 0,25  | 0,665933714 | 0,61  | 0,267677873 |
| Rsrp1   | 0,23  | 0,770528465 | -0,03 | 0,979551751 | -0,6  | 0,186321498 | -0,15 | 0,702077739 | 0,52  | 0,436502076 |
| Rsu1    | -0,31 | 0,427623648 | -0,44 | 0,254779355 | 0,58  | 0,375948654 | 0,71  | 0,069740206 | -0,43 | 0,408862062 |
| Rtbdn   | -0,03 | 0,972720447 | -0,18 | 0,792112243 | -0,27 | 0,7472431   | -0,23 | 0,703803198 | -0,16 | 0,884640084 |
| Rtca    | -0,43 | 0,441176207 | 0,15  | 0,775053599 | 0,43  | 0,46154539  | -0,27 | 0,633071558 | 0,29  | 0,696344021 |
| Rtcb    | -0,26 | 0,536125623 | 0,15  | 0,751382934 | 0,31  | 0,705811313 | 0,53  | 0,220838488 | 0,44  | 0,414033358 |
| Rtel1   | -0,37 | 0,568831614 | -0,17 | 0,842145037 | 0,91  | 0,287512572 | 0,16  | 0,843922409 | -0,17 | 0,868992925 |
| Rtff1   | 0,04  | 0,956452501 | 0,32  | 0,691113558 | 0,21  | 0,742758388 | -0,68 | 0,141647436 | 0,15  | 0,851879163 |
| Rtfdc1  | 0,28  | 0,621072378 | 0,27  | 0,58975075  | -0,48 | 0,411884367 | 0,03  | 0,958172386 | -0,23 | 0,740020498 |
| Rtkn    | -0,26 | 0,754653765 | -0,17 | 0,712978147 | 0,24  | 0,758675564 | 0,68  | 0,234695617 | -0,36 | 0,637300707 |
| Rtkn2   | -0,49 | 0,373844376 | -0,39 | 0,801259805 | 0,76  | 0,161469949 | 0,18  | 0,91319766  | 0,05  | 0,975441362 |
| Rtl1    | -0,17 | 0,764189777 | -0,33 | 0,619501651 | 0,29  | 0,670137495 | -0,12 | 0,85567266  | -0,2  | 0,859663155 |
| Rtn1    | -0,11 | 0,923476133 | -0,2  | 0,780617766 | 0,28  | 0,691009366 | -1,19 | 0,109546855 | -0,11 | 0,931519966 |
| Rtn2    | 0,25  | 0,597519827 | 0,15  | 0,932292974 | 0,31  | 0,777568498 | 0,19  | 0,897599603 | 0,25  | 0,819072786 |
| Rtn3    | -0,02 | 0,975506993 | -0,27 | 0,568282579 | 0,12  | 0,867109522 | -0,49 | 0,165567352 | -0,27 | 0,603709264 |
| Rtn4    | -0,08 | 0,889867231 | 0,08  | 0,912535732 | -0,02 | 0,985756057 | 0,47  | 0,481231467 | 0,47  | 0,5803138   |
| Rtn4ip1 | 0,15  | 0,853962146 | -0,16 | 0,696346398 | 0,1   | 0,910060392 | 0,56  | 0,648766563 | 0,92  | 0,307250018 |
| Rtn4r   | 0,02  | 0,98120593  | -0,15 | 0,772558681 | 0,11  | 0,868609956 | 0,2   | 0,529426866 | 0,24  | 0,65571214  |
| Rtn4rl1 | 0,09  | 0,91384779  | 0,34  | 0,49125334  | -0,23 | 0,640613239 | -0,3  | 0,581988484 | -0,66 | 0,251771039 |
| Rtn4rl2 | -0,13 | 0,757032046 | 0,21  | 0,692189927 | 0     | 0,999212096 | -0,18 | 0,69151142  | 0,1   | 0,916297433 |
| Rtp1    | -0,04 | 0,955200574 | -0,39 | 0,680709276 | 0,12  | 0,841510741 | 0,42  | 0,219519453 | 0,16  | 0,820234867 |
| Rtp2    | 0,09  | 0,875224822 | -0,05 | 0,920791683 | -0,31 | 0,471873683 | 0,25  | 0,525382036 | -0,12 | 0,910829332 |
| Rtp3    | 0,97  | 0,242651292 | 0,89  | 0,296841418 | -1,54 | 0,067624618 | -0,77 | 0,40199632  | 0,99  | 0,171064668 |
| Rtp4    | 0,37  | 0,306829062 | 0,48  | 0,341617639 | -0,84 | 0,062420645 | -0,67 | 0,156400815 | 0,44  | 0,387184688 |
| Rttn    | -0,67 | 0,290080288 | -0,19 | 0,754806351 | 0,56  | 0,470418834 | -0,62 | 0,120154902 | -0,47 | 0,332695011 |
| Rubcn   | -0,36 | 0,385920627 | -0,18 | 0,811280211 | 0,56  | 0,342219539 | 0,92  | 0,328062759 | 0,03  | 0,984065984 |
| Rubie   | -0,37 | 0,594739156 | 0,39  | 0,736703575 | 0     | 0,998779926 | -0,25 | 0,615181679 | 0,03  | 0,977236465 |
| Rufy1   | -0,02 | 0,984725403 | 0,07  | 0,943915456 | 0,1   | 0,939963707 | -0,38 | 0,382991753 | -0,39 | 0,503434686 |
| Rufy2   | -0,17 | 0,800023642 | 0,21  | 0,842145037 | 0,14  | 0,894339966 | -0,88 | 0,045154322 | -0,16 | 0,8311636   |
| Rufy3   | -0,17 | 0,79498488  | 0,53  | 0,438536941 | 0,18  | 0,899941244 | 0,21  | 0,712887618 | 0,46  | 0,435285665 |
| Rufy4   | 0,08  | 0,938204779 | -0,5  | 0,511032151 | -0,48 | 0,665379478 | 0,39  | 0,40278549  | -0,13 | 0,859838459 |
| Rundc1  | 0,07  | 0,940051958 | -0,2  | 0,815973308 | 0,1   | 0,909109169 | -0,11 | 0,914500436 | -0,08 | 0,949751787 |
| Rundc3a | -0,8  | 0,123854815 | -0,79 | 0,441733752 | 1,14  | 0,037092574 | 1,18  | 0,047853363 | -0,58 | 0,330057248 |

|          |       |             |       |             |       |             |       |             |       |             |
|----------|-------|-------------|-------|-------------|-------|-------------|-------|-------------|-------|-------------|
| Rundc3b  | -0,51 | 0,662416763 | 0,68  | 0,806914518 | -1,13 | 0,386398605 | -0,54 | 0,744107161 | -0,81 | 0,69845137  |
| Runx1    | 1,17  | 0,277692472 | 0,86  | 0,459231649 | 0,31  | 0,624087446 | 0,15  | 0,932800758 | 1,28  | 0,199163495 |
| Runx1t1  | -0,35 | 0,602197374 | 0,24  | 0,803158498 | 0,16  | 0,823823322 | -2,31 | 0,025158554 | -0,65 | 0,654075099 |
| Runx2    | -0,11 | 0,888313403 | -0,43 | 0,43181045  | -0,05 | 0,973690509 | 0,66  | 0,120568928 | 0,33  | 0,541434584 |
| Runx2os1 | -0,01 | 0,990200396 | 0,04  | 0,943713379 | 0,12  | 0,897233315 | 0,05  | 0,909317661 | 0,1   | 0,880054033 |
| Runx2os2 | 0,36  | 0,573661766 | -0,17 | 0,664844961 | -0,35 | 0,543291636 | -0,08 | 0,923853611 | 0,05  | 0,971718183 |
| Runx3    | -0,04 | 0,975341177 | -0,02 | 0,981914565 | -0,56 | 0,599364835 | 0,3   | 0,479021206 | 0,12  | 0,894327929 |
| Rusc1    | -0,37 | 0,39713821  | 0,04  | 0,969467656 | 0,25  | 0,731162964 | -0,8  | 0,095122753 | -0,24 | 0,722834592 |
| Rusc2    | 0,11  | 0,890974575 | 0,65  | 0,29487254  | -0,63 | 0,302861841 | -0,83 | 0,179012087 | -0,09 | 0,928199957 |
| Ruvbl1   | -0,8  | 0,272587269 | -0,51 | 0,302028989 | 0,64  | 0,311072959 | 0,7   | 0,454948356 | -0,06 | 0,973428839 |
| Ruvbl2   | -0,37 | 0,414026998 | -0,45 | 0,363919957 | 0,57  | 0,13589176  | 0,65  | 0,121193897 | 0,13  | 0,860591136 |
| Rwdd1    | -0,44 | 0,583196213 | -0,14 | 0,849047797 | 0,1   | 0,934958173 | 0,76  | 0,577914953 | -0,06 | 0,979851387 |
| Rwdd2a   | -0,41 | 0,376151377 | 0,11  | 0,930542276 | 0,2   | 0,845651772 | 0,05  | 0,970163463 | -0,19 | 0,896309919 |
| Rwdd2b   | 0,25  | 0,74764092  | -0,24 | 0,782652703 | 0,13  | 0,826849099 | 0,13  | 0,87811903  | -0,16 | 0,848679763 |
| Rwdd3    | -0,26 | 0,78476082  | -0,32 | 0,602956592 | -0,12 | 0,938795886 | -0,04 | 0,967866794 | -0,04 | 0,979248953 |
| Rwdd4a   | 0,03  | 0,964124037 | -0,25 | 0,615311543 | 0,31  | 0,750624323 | 0,5   | 0,344919402 | 0,15  | 0,847312006 |
| Rxfrp1   | -0,07 | 0,921306075 | -0,03 | 0,979406438 | -0,27 | 0,535647315 | -0,11 | 0,874701048 | -0,11 | 0,925858284 |
| Rxfrp2   | 0,14  | 0,84900712  | 0,01  | 0,99614602  | 0     | 0,997394645 | -0,01 | 0,987478998 | 0,02  | 0,983613958 |
| Rxfrp3   | -0,24 | 0,80309313  | 0,17  | 0,661566887 | -0,32 | 0,455770196 | -0,34 | 0,492527391 | -0,07 | 0,940149515 |
| Rxfrp4   | 0,16  | 0,722348441 | 0     | 1           | 0,06  | 0,938456865 | -0,08 | 0,868828239 | -0,03 | 0,97425848  |
| Rxra     | -0,31 | 0,7914678   | -0,65 | 0,410501758 | 0,77  | 0,222783029 | -0,05 | 0,968309889 | -0,32 | 0,781405349 |
| Rxrb     | 0,24  | 0,560965941 | 0,04  | 0,954866231 | -0,36 | 0,64918436  | -0,27 | 0,712115859 | 0,08  | 0,947559952 |
| Rxrg     | -0,25 | 0,741182094 | -0,07 | 0,926157704 | -0,43 | 0,507406147 | -0,06 | 0,956803614 | 0,05  | 0,969994712 |
| Rybp     | 0,28  | 0,455860008 | 0,31  | 0,51825831  | 0,28  | 0,571405665 | -0,15 | 0,76830391  | 0,3   | 0,673145862 |
| Ryk      | -0,19 | 0,739638841 | 0,12  | 0,879707211 | -0,28 | 0,717856288 | -0,65 | 0,377681746 | -0,13 | 0,913274952 |
| Ryr1     | 0,23  | 0,679113235 | 0,16  | 0,738762579 | -0,2  | 0,740194064 | 0,16  | 0,781338312 | 0,08  | 0,935812103 |
| Ryr2     | 0,03  | 0,966775766 | -0,16 | 0,738762579 | -0,31 | 0,500343254 | -0,2  | 0,554492077 | -0,13 | 0,84147389  |
| Ryr3     | 0,11  | 0,883674476 | 0,09  | 0,894563348 | -0,3  | 0,657033969 | 0,16  | 0,899335603 | 0,02  | 0,991628025 |
| S100a1   | 0,12  | 0,855264133 | 0,15  | 0,800821935 | 0,14  | 0,868590766 | -1,65 | 0,016312812 | -0,02 | 0,979643119 |
| S100a10  | 0,11  | 0,783576927 | -0,09 | 0,842663656 | 0,27  | 0,620837479 | -0,22 | 0,529943394 | -0,12 | 0,860591136 |
| S100a11  | 0,42  | 0,229156445 | 0,03  | 0,970832543 | 0,02  | 0,982305856 | 0,92  | 0,05822833  | 0,02  | 0,980961333 |
| S100a13  | 0,08  | 0,892823025 | 0,15  | 0,804897085 | 0,25  | 0,751758339 | -0,44 | 0,306441142 | 0,01  | 0,993293923 |
| S100a14  | 0     | 0,996998625 | -0,17 | 0,831772883 | 0,29  | 0,665554804 | -0,13 | 0,820360895 | -0,17 | 0,823098095 |
| S100a16  | 0,07  | 0,887389217 | 0,15  | 0,805816365 | -0,05 | 0,95907725  | -0,27 | 0,443508321 | -0,37 | 0,442579293 |
| S100a2   | 0,12  | 0,792735264 | 0,09  | 0,90164068  | 0,04  | 0,967304745 | -0,09 | 0,801094963 | 0,08  | 0,937215184 |

|         |       |             |       |             |       |             |       |             |       |             |
|---------|-------|-------------|-------|-------------|-------|-------------|-------|-------------|-------|-------------|
| S100a3  | -0,24 | 0,662416763 | -0,1  | 0,947186948 | 0,37  | 0,718340918 | 0,28  | 0,365195906 | 0,39  | 0,698115018 |
| S100a4  | -0,92 | 0,222236104 | -0,81 | 0,478581721 | 0,72  | 0,457740325 | -3,42 | 0,004079913 | -0,69 | 0,182954609 |
| S100a5  | 0,11  | 0,908108677 | 0,18  | 0,786190103 | -0,19 | 0,797779047 | -0,45 | 0,621810528 | -0,13 | 0,85508146  |
| S100a6  | 0,29  | 0,506510917 | -0,02 | 0,974580396 | 0,38  | 0,471288457 | 0,27  | 0,499022095 | 0,06  | 0,955762408 |
| S100a7a | -0,04 | 0,968236663 | -0,08 | 0,919873208 | -1,35 | 0,244162723 | -0,23 | 0,578896547 | -0,17 | 0,880202418 |
| S100a8  | 0,27  | 0,64731591  | 0,19  | 0,857388191 | 0,55  | 0,854115638 | -0,4  | 0,254444179 | -0,11 | 0,911850421 |
| S100a9  | 0,31  | 0,69184055  | 0,05  | 0,955382206 | 0,61  | 0,789768168 | -0,56 | 0,234947331 | -0,18 | 0,864004866 |
| S100b   | -0,08 | 0,926316023 | 0,17  | 0,859816636 | -0,04 | 0,95136091  | 0,35  | 0,446844848 | 0,16  | 0,823098095 |
| S100g   | 0,3   | 0,537328866 | 0,01  | 0,993789602 | -0,1  | 0,898382247 | -1,2  | 0,23789595  | -0,02 | 0,991437885 |
| S100pbp | 0     | 0,999218248 | 0     | 0,999210601 | 0,12  | 0,922318683 | 0,58  | 0,089879955 | 0,31  | 0,632958559 |
| S100z   | -0,24 | 0,655623232 | 0,01  | 0,994137877 | -0,79 | 0,585645978 | 0,2   | 0,598473186 | -0,1  | 0,899196564 |
| S1pr1   | -0,11 | 0,795424954 | 0,01  | 0,995102577 | -0,09 | 0,885680687 | -0,04 | 0,931639562 | -0,26 | 0,612318407 |
| S1pr2   | -0,8  | 0,40477934  | 0,02  | 0,982786635 | 0,31  | 0,488568903 | 0,51  | 0,250595614 | 0     | 0,995462242 |
| S1pr3   | 0,06  | 0,983500773 | 0,55  | 0,627386884 | -0,15 | 0,929395646 | -1,66 | 0,345221746 | -1,32 | 0,440267055 |
| S1pr4   | -0,07 | 0,90742841  | -0,09 | 0,882918801 | 0,29  | 0,660561609 | -0,16 | 0,665234661 | -0,35 | 0,464535028 |
| S1pr5   | -0,59 | 0,226618439 | -0,27 | 0,618203657 | 0,16  | 0,826849099 | 0,93  | 0,094538857 | 0,38  | 0,535063818 |
| Saa1    | 0,04  | 0,964976202 | -0,41 | 0,441995301 | -0,62 | 0,383161457 | 0,37  | 0,742706747 | 0,04  | 0,984125319 |
| Saa2    | -0,81 | 0,526698411 | 0,17  | 0,898952381 | 0,09  | 0,952888594 | 0,38  | 0,498464741 | 0,28  | 0,824818547 |
| Saa3    | -0,23 | 0,706900702 | -0,75 | 0,509013394 | 0,71  | 0,730738549 | 2,18  | 0,008840293 | -0,23 | 0,726563756 |
| Saa4    | -0,2  | 0,791021845 | 0,18  | 0,880473303 | 0,05  | 0,960666071 | -0,08 | 0,932315462 | 0,23  | 0,82840392  |
| Saal1   | -0,68 | 0,494355897 | -1,12 | 0,179302441 | 0,66  | 0,386794456 | 0,05  | 0,932315462 | -0,51 | 0,479585604 |
| Sac3d1  | 0,34  | 0,482077988 | -0,47 | 0,228649557 | -0,07 | 0,944078985 | 1,92  | 0,035092134 | 0,1   | 0,956702425 |
| Sacm1l  | 0,12  | 0,874467978 | 0     | 1           | 0,05  | 0,969157619 | 0,49  | 0,288101709 | 0,47  | 0,381257197 |
| Sacs    | -0,65 | 0,235549559 | 0,16  | 0,873640843 | 0,13  | 0,929871006 | 0,98  | 0,335352248 | 0,39  | 0,761121493 |
| Sae1    | -1,01 | 0,094134789 | -0,37 | 0,666450149 | 1,4   | 0,086073998 | 0,67  | 0,344824954 | -0,07 | 0,966358058 |
| Safb    | 0,1   | 0,895836715 | 0,2   | 0,839195196 | -0,17 | 0,904424307 | 0     | 1           | 0,17  | 0,834295448 |
| Safb2   | 0,27  | 0,737515792 | 0,09  | 0,933767558 | -0,19 | 0,823396412 | -0,23 | 0,772721986 | -0,12 | 0,909363599 |
| Sag     | -0,09 | 0,898672447 | -0,6  | 0,568187167 | -0,58 | 0,174478394 | 0,4   | 0,684136103 | 0,11  | 0,93193727  |
| Sall1   | -0,09 | 0,897013506 | -0,45 | 0,712500402 | -0,07 | 0,955303601 | -0,08 | 0,871289126 | -0,68 | 0,495040551 |
| Sall2   | -0,02 | 0,993175772 | -0,14 | 0,883093763 | -0,38 | 0,660517013 | 0,08  | 0,948804365 | -0,35 | 0,680015121 |
| Sall3   | -0,28 | 0,506476054 | 0,14  | 0,821170447 | -0,16 | 0,877366773 | 0,69  | 0,21936569  | 0,11  | 0,884247878 |
| Sall4   | 0,28  | 0,592678993 | 0,09  | 0,947684955 | -0,08 | 0,909371204 | 0,22  | 0,810508503 | 0,67  | 0,32673984  |
| Samd1   | -0,11 | 0,852198853 | -0,22 | 0,794404033 | 0,02  | 0,985093393 | 0,05  | 0,953576791 | -0,12 | 0,914864109 |
| Samd10  | -0,07 | 0,935737948 | 0,13  | 0,912137323 | -0,2  | 0,72316448  | -0,85 | 0,236012365 | -0,37 | 0,689647206 |
| Samd11  | 0,32  | 0,519823113 | -0,34 | 0,541570411 | -0,01 | 0,993935103 | 0,09  | 0,856184745 | 0,17  | 0,864166878 |



|         |       |             |       |             |       |             |       |             |       |             |
|---------|-------|-------------|-------|-------------|-------|-------------|-------|-------------|-------|-------------|
| Samd12  | -1,07 | 0,438932987 | 0,34  | 0,80192513  | -0,7  | 0,725314316 | -4,02 | 0,007101957 | -0,24 | 0,740522769 |
| Samd14  | -0,17 | 0,704641551 | 0,3   | 0,606866408 | 1,06  | 0,041860694 | -0,6  | 0,26635871  | -0,47 | 0,530072156 |
| Samd15  | -0,51 | 0,204969298 | 1,02  | 0,412008994 | -0,27 | 0,775492921 | -0,08 | 0,932489351 | 0,68  | 0,535113522 |
| Samd3   | -0,48 | 0,315801833 | -0,15 | 0,930849936 | -0,24 | 0,715497532 | 0,19  | 0,826341157 | 0,17  | 0,887287916 |
| Samd4   | -0,35 | 0,687061733 | -0,49 | 0,571026746 | 0,95  | 0,124647743 | 0,66  | 0,27265692  | -0,66 | 0,210614146 |
| Samd4b  | -0,22 | 0,618567097 | -0,19 | 0,815317911 | 0,82  | 0,087990365 | 0,58  | 0,209734584 | -0,36 | 0,549181666 |
| Samd5   | -0,18 | 0,774822327 | -0,32 | 0,483210988 | -0,01 | 0,992201196 | 0,38  | 0,395583835 | 0,13  | 0,892349039 |
| Samd7   | -0,06 | 0,925497656 | 0,06  | 0,937424389 | -0,13 | 0,881463812 | 0,19  | 0,677178467 | 0,21  | 0,735152891 |
| Samd8   | -0,49 | 0,340239318 | -0,21 | 0,783858612 | 0,43  | 0,489149594 | 0,63  | 0,673639857 | 0,34  | 0,845723936 |
| Samd9l  | 0,4   | 0,372898143 | 0,61  | 0,27798415  | -0,53 | 0,264920343 | 0,1   | 0,850699918 | 1,06  | 0,032750472 |
| Samhd1  | 1,67  | 0,053226128 | 1,51  | 0,0535509   | -2,29 | 0,000168762 | -0,32 | 0,316055884 | 1,93  | 0,003129313 |
| Samh50  | -0,27 | 0,659879365 | -0,63 | 0,345409693 | 0,55  | 0,539291609 | 0,63  | 0,154588425 | -0,22 | 0,835191    |
| Samsn1  | -0,03 | 0,964154899 | -0,15 | 0,853569707 | 0,27  | 0,721083003 | 0,35  | 0,496598311 | -0,04 | 0,976345724 |
| Samt3   | 0,08  | 0,862322913 | -0,11 | 0,854940418 | -0,13 | 0,845651772 | -0,19 | 0,727197341 | 0,12  | 0,872242794 |
| Samt4   | 0,37  | 0,424529546 | 0,25  | 0,764299173 | -0,1  | 0,910780139 | 0,25  | 0,698921024 | 0,05  | 0,953297732 |
| Sap130  | -0,16 | 0,739730773 | -0,16 | 0,84614794  | 0,11  | 0,904131156 | -0,11 | 0,815481061 | -0,43 | 0,363127424 |
| Sap18   | 0,51  | 0,365448495 | -0,13 | 0,89647435  | -0,36 | 0,552331473 | -1,32 | 0,074454367 | 0,19  | 0,858534673 |
| Sap30   | -0,25 | 0,692490424 | 0,08  | 0,930192503 | 0,5   | 0,353588425 | 0,75  | 0,094014104 | -0,05 | 0,958259949 |
| Sap30bp | -0,06 | 0,932531737 | 0,09  | 0,926178529 | 0,67  | 0,525710952 | 0,12  | 0,825899927 | -0,14 | 0,865258929 |
| Sap30l  | 0,28  | 0,689966234 | -0,26 | 0,66248025  | -0,12 | 0,848462153 | -0,14 | 0,797858587 | -0,03 | 0,977696821 |
| Sapcd1  | -0,33 | 0,728739942 | -0,11 | 0,943915456 | 0,21  | 0,776071062 | -0,09 | 0,953429313 | -0,04 | 0,979643119 |
| Sapcd2  | 0,15  | 0,77908533  | -0,2  | 0,686540452 | 0,46  | 0,418405756 | 0,8   | 0,199449854 | 0,12  | 0,911780802 |
| Sar1a   | 0,03  | 0,955919722 | 0,11  | 0,827496723 | 0,21  | 0,814575035 | 0,11  | 0,76525163  | 0,29  | 0,56065793  |
| Sar1b   | -0,09 | 0,887517705 | -0,36 | 0,468585948 | -0,01 | 0,990836784 | 0,26  | 0,536344767 | 0,24  | 0,68987325  |
| Saraf   | -0,15 | 0,754029145 | 0,3   | 0,686540452 | 0,3   | 0,641366948 | -0,56 | 0,28415651  | 0,5   | 0,416134174 |
| Sardh   | -0,83 | 0,293120261 | -0,44 | 0,553970994 | 0,56  | 0,26478657  | -0,13 | 0,919126119 | -0,63 | 0,50645537  |
| Sarm1   | 0,67  | 0,179001759 | 0,36  | 0,715733316 | 0,23  | 0,757498725 | -0,5  | 0,267147508 | -0,21 | 0,767285294 |
| Sarnp   | 0,09  | 0,909232325 | -0,05 | 0,945374636 | 0,29  | 0,676418104 | -0,11 | 0,897576959 | 0,22  | 0,80155635  |
| Sars    | -0,08 | 0,886889675 | 0,16  | 0,842824184 | 0,26  | 0,671012215 | 0,6   | 0,224359102 | 0,63  | 0,276728769 |
| Sars2   | -0,23 | 0,800023642 | -0,34 | 0,612645853 | 0,29  | 0,570743031 | 0,82  | 0,043778357 | -0,15 | 0,802802845 |
| Sart1   | -0,36 | 0,482062253 | -0,01 | 0,995199255 | 0,2   | 0,772883091 | -0,06 | 0,914828446 | -0,56 | 0,257751018 |
| Sart3   | -0,2  | 0,829299665 | -0,15 | 0,910193022 | 0,2   | 0,744938587 | 0,01  | 0,994761295 | -0,55 | 0,593298551 |
| Sash1   | -0,38 | 0,578185633 | -0,2  | 0,750777564 | -0,11 | 0,936425237 | -0,27 | 0,781338312 | -0,24 | 0,831834722 |
| Sash3   | -0,05 | 0,948926586 | -0,81 | 0,123957038 | -0,54 | 0,431170949 | 0,63  | 0,322564589 | 0,43  | 0,592460098 |
| Sass6   | -0,22 | 0,856118781 | -0,38 | 0,838684509 | 0,55  | 0,562169896 | 1,08  | 0,118739789 | 0,1   | 0,952971656 |

|         |       |             |       |             |       |             |       |             |       |             |
|---------|-------|-------------|-------|-------------|-------|-------------|-------|-------------|-------|-------------|
| Sat1    | 0,37  | 0,296573383 | 0,08  | 0,908024228 | -0,88 | 0,300971628 | 1,09  | 0,093943504 | 0,35  | 0,626176831 |
| Sat2    | 0,44  | 0,620305961 | 0,58  | 0,367968212 | -0,2  | 0,926982123 | -0,12 | 0,906993005 | 0,07  | 0,971130082 |
| Satb1   | -0,13 | 0,874688734 | -0,23 | 0,674832256 | -0,59 | 0,481504499 | -1,81 | 0,021819661 | -0,22 | 0,832781095 |
| Satb2   | -0,49 | 0,613387484 | 0,56  | 0,373555617 | 0,34  | 0,757498725 | -0,35 | 0,70344102  | 0,69  | 0,434163214 |
| Satl1   | 0,02  | 0,98967038  | -0,04 | 0,977422441 | -0,64 | 0,343594254 | 0,32  | 0,71158821  | 0     | 0,999567101 |
| Sav1    | 0,1   | 0,839871081 | 0,08  | 0,931168835 | 0,12  | 0,894018349 | 0,16  | 0,696837631 | 0,7   | 0,206640282 |
| Saxo1   | -0,48 | 0,351227704 | -0,63 | 0,614530823 | -0,12 | 0,926633738 | 0,88  | 0,271252298 | 0,37  | 0,565696273 |
| Saxo1os | -0,07 | 0,903817676 | -0,09 | 0,869006629 | 0,33  | 0,436827113 | -0,07 | 0,861762288 | -0,13 | 0,864540232 |
| Saxo2   | 0,58  | 0,199966188 | -0,44 | 0,732044571 | 0     | 0,999156091 | -0,14 | 0,956440618 | -0,73 | 0,673120647 |
| Saysd1  | 0,14  | 0,794588318 | 0,12  | 0,868234125 | 0,04  | 0,963199274 | -0,13 | 0,896893    | 0,11  | 0,939127163 |
| Sbds    | 0,01  | 0,991027737 | 0,13  | 0,790350061 | 0,17  | 0,809062815 | -0,42 | 0,283845943 | 0,17  | 0,805875294 |
| Sbf1    | -0,03 | 0,976314749 | 0,13  | 0,859223551 | 0,3   | 0,736837174 | 0,29  | 0,506071222 | 0,04  | 0,968038677 |
| Sbf2    | -0,01 | 0,988818464 | 0,11  | 0,866248527 | 0,2   | 0,841563482 | -0,89 | 0,067623231 | -0,21 | 0,769851229 |
| Sbk1    | -0,19 | 0,824639882 | -0,39 | 0,291180284 | 0,45  | 0,361580981 | -0,2  | 0,673534755 | -0,04 | 0,97206128  |
| Sbk2    | -0,27 | 0,582837718 | 0,1   | 0,926157704 | -0,11 | 0,865145801 | 0,04  | 0,966197507 | -0,27 | 0,695593525 |
| Sbk3    | -0,04 | 0,937251448 | -0,35 | 0,779825075 | -0,02 | 0,988373086 | -0,02 | 0,980724248 | -0,44 | 0,468795308 |
| Sbno1   | -0,1  | 0,84900712  | 0,22  | 0,738762579 | -0,23 | 0,718601435 | -0,21 | 0,66521568  | 0,11  | 0,885872093 |
| Sbno2   | 0,39  | 0,508347084 | 0,27  | 0,569532701 | -0,14 | 0,862869965 | -0,36 | 0,274874633 | 0,52  | 0,241261852 |
| Sbp     | 0,23  | 0,54401985  | 0,07  | 0,961370411 | -0,19 | 0,740220539 | -0,53 | 0,116906613 | -0,24 | 0,638868989 |
| Sbpl    | -0,21 | 0,766705553 | 0,14  | 0,750983147 | -0,29 | 0,605297015 | -0,05 | 0,903739255 | -0,14 | 0,844105751 |
| Sbsn    | 0,04  | 0,954487406 | 0,27  | 0,702991386 | 0,2   | 0,79284622  | -0,2  | 0,540943343 | -0,18 | 0,823098095 |
| Sbspon  | -0,21 | 0,808435056 | -0,1  | 0,945143056 | -0,15 | 0,830643122 | -0,62 | 0,712740409 | -0,16 | 0,952718905 |
| Sc5d    | 0,08  | 0,957820843 | 0,2   | 0,882847123 | -0,15 | 0,881463812 | 0,14  | 0,820360895 | 0,56  | 0,570939418 |
| Scaf1   | 0,03  | 0,966775766 | -0,14 | 0,831580851 | 0,22  | 0,715403033 | -0,29 | 0,446844848 | -0,34 | 0,538811506 |
| Scaf11  | 0,22  | 0,677868943 | 0,16  | 0,790504142 | 0,97  | 0,060293803 | 0,08  | 0,924110762 | 0,3   | 0,728530603 |
| Scaf4   | -0,14 | 0,804578767 | -0,01 | 0,994161588 | 0,32  | 0,576775067 | 0,04  | 0,949432584 | -0,14 | 0,891011128 |
| Scaf8   | 0,03  | 0,979827119 | 0,08  | 0,894767476 | -0,02 | 0,988120354 | -0,18 | 0,596178492 | -0,03 | 0,976743304 |
| Scai    | -0,37 | 0,69770522  | -0,43 | 0,583200444 | 0,03  | 0,993379272 | -0,73 | 0,546441525 | -0,77 | 0,499033515 |
| Scamp1  | -0,21 | 0,74672311  | -0,73 | 0,418929848 | 0,01  | 0,997268369 | 0,28  | 0,656084967 | 0,22  | 0,744216956 |
| Scamp2  | -0,06 | 0,933253663 | -0,25 | 0,805467498 | -0,03 | 0,975866042 | 0,4   | 0,302214149 | -0,32 | 0,555948564 |
| Scamp3  | 0,08  | 0,905410816 | 0,3   | 0,547143296 | -0,33 | 0,546176404 | -0,28 | 0,422034375 | -0,27 | 0,623214829 |
| Scamp4  | -0,13 | 0,840909921 | -0,34 | 0,530207532 | 0,5   | 0,405230228 | 0,35  | 0,447819862 | 0,06  | 0,953297732 |
| Scamp5  | -0,28 | 0,631796741 | -0,39 | 0,564634931 | -0,52 | 0,599648113 | 2,08  | 0,005494861 | 0,01  | 0,992438465 |
| Scand1  | 0,16  | 0,823793867 | 0,01  | 0,998754213 | 0,21  | 0,646210295 | 0,24  | 0,711746438 | -0,07 | 0,951646452 |
| Scap    | -0,61 | 0,257494498 | -0,23 | 0,728434379 | 0,35  | 0,647988621 | -0,33 | 0,707902199 | -0,51 | 0,568949282 |

|            |       |             |       |             |       |             |       |             |       |             |
|------------|-------|-------------|-------|-------------|-------|-------------|-------|-------------|-------|-------------|
| Scaper     | -0,26 | 0,557114011 | 0,58  | 0,387705841 | -0,43 | 0,328297131 | -0,87 | 0,157857546 | -0,28 | 0,690432079 |
| Scara3     | -0,13 | 0,832889444 | -0,27 | 0,694422914 | 0,29  | 0,734944001 | -0,33 | 0,519126134 | -0,43 | 0,563077271 |
| Scara5     | -0,02 | 0,989110761 | 0,22  | 0,782705189 | 0,24  | 0,59777412  | -0,18 | 0,594095293 | -0,18 | 0,789358981 |
| Scarb1     | -0,64 | 0,180356049 | -0,45 | 0,347797865 | 0,89  | 0,059479841 | 0,31  | 0,451374247 | -1    | 0,051651981 |
| Scarb2     | -0,18 | 0,841140165 | 0,32  | 0,680709276 | -0,78 | 0,228505532 | -1,28 | 0,0456902   | 0,35  | 0,4940585   |
| Scarf1     | -0,22 | 0,568104198 | -0,13 | 0,781665479 | -0,09 | 0,914301036 | 0,47  | 0,283327727 | -0,13 | 0,872443959 |
| Scarf2     | -0,14 | 0,850851423 | 0,14  | 0,93163271  | 0,28  | 0,723037215 | -0,91 | 0,158478976 | -0,48 | 0,745574572 |
| Scarletttr | 0,31  | 0,748619201 | -0,45 | 0,765370871 | 0,26  | 0,601532621 | 0,66  | 0,383836854 | -0,01 | 0,994821569 |
| Scarna13   | -0,1  | 0,896207658 | 0,21  | 0,688885149 | -0,21 | 0,8290371   | -0,26 | 0,515329684 | -0,05 | 0,947437555 |
| Scarna17   | -0,04 | 0,976574175 | 0,39  | 0,767178812 | -0,32 | 0,782988471 | -1,72 | 0,075520945 | 0,09  | 0,957620856 |
| Scarna2    | 0,03  | 0,964216121 | 0,33  | 0,61193546  | -0,64 | 0,474479799 | -1,33 | 0,035492866 | 0,02  | 0,98653183  |
| Scarna3a   | 0,64  | 0,400356346 | 0,17  | 0,898039508 | 0,17  | 0,848330689 | 0,17  | 0,871799382 | 0,44  | 0,640213665 |
| Scarna3b   | -0,28 | 0,761457464 | 0,27  | 0,703255839 | 0,01  | 0,996397104 | 0,21  | 0,821483546 | 0,83  | 0,168781914 |
| Scarna6    | -0,03 | 0,984124693 | -0,02 | 0,99804971  | -0,45 | 0,861307315 | 0,93  | 0,453295658 | 0,84  | 0,420919138 |
| Scarna8    | 0,25  | 0,878562194 | -1,34 | 0,084290601 | 0,94  | 0,516062803 | 1,2   | 0,168647568 | -0,1  | 0,960600508 |
| Sccpdh     | -0,36 | 0,476180777 | -0,23 | 0,620236896 | 1,41  | 0,041414494 | 2,17  | 0,137301874 | 0,06  | 0,980961333 |
| Scd1       | -1,08 | 0,129299808 | -0,52 | 0,800262513 | 0,61  | 0,697383223 | -2,96 | 0,013195605 | -0,68 | 0,279515946 |
| Scd2       | -0,69 | 0,097625832 | -1,4  | 0,158696948 | 1,65  | 0,015094778 | 0,66  | 0,129154295 | -1,58 | 0,053419226 |
| Scd3       | 0,19  | 0,791150064 | 0,24  | 0,813150671 | -0,21 | 0,770526999 | 0,14  | 0,87148686  | 0,01  | 0,990839896 |
| Scd4       | -0,41 | 0,432091361 | -0,22 | 0,868912646 | 0,24  | 0,747906037 | -0,39 | 0,499022095 | 0,04  | 0,977689987 |
| Scel       | 0,15  | 0,785012364 | -0,17 | 0,809963911 | 0,18  | 0,825125026 | -0,17 | 0,831815236 | -0,03 | 0,982816728 |
| Scfd1      | 0,05  | 0,950532575 | 0,14  | 0,792112243 | 0,01  | 0,997220401 | 0,24  | 0,557973754 | 0,72  | 0,18003283  |
| Scfd2      | -0,87 | 0,353593061 | -0,45 | 0,430154065 | 0,72  | 0,206138966 | 1,02  | 0,469620983 | 0,26  | 0,898309858 |
| Scg2       | 0,03  | 0,962030279 | -0,05 | 0,935329426 | -0,16 | 0,861307315 | -0,24 | 0,737366847 | -0,21 | 0,792404969 |
| Scg3       | -0,11 | 0,886248487 | 0,52  | 0,254708337 | -0,21 | 0,713620433 | -0,31 | 0,320669911 | 0,04  | 0,969927511 |
| Scg5       | 0,37  | 0,701627731 | 0,15  | 0,768960318 | -0,28 | 0,757498725 | -0,43 | 0,295171068 | -0,46 | 0,490247948 |
| Scgb1a1    | 0,05  | 0,922591969 | -0,02 | 0,979406438 | -0,16 | 0,818840027 | -0,04 | 0,970931237 | 0,05  | 0,947437555 |
| Scgb1b19   | 0,29  | 0,485067976 | -0,15 | 0,798963476 | -0,01 | 0,99394877  | 0,48  | 0,220262993 | 0,07  | 0,929127539 |
| Scgb1b2    | 0,07  | 0,893137556 | -0,19 | 0,861905894 | 0,03  | 0,972708325 | 0,85  | 0,074454367 | -0,15 | 0,839214791 |
| Scgb1b20   | 0,08  | 0,865828705 | 0,24  | 0,696259711 | 0,05  | 0,943472333 | -0,07 | 0,922740736 | 0,07  | 0,939127163 |
| Scgb1b24   | 0,1   | 0,840909921 | -0,19 | 0,724772268 | -0,02 | 0,97915111  | 0,16  | 0,759281029 | 0,2   | 0,765340194 |
| Scgb1b27   | -0,21 | 0,65761852  | -0,18 | 0,783766709 | -0,2  | 0,751758339 | 0,29  | 0,502230334 | 0,02  | 0,978556079 |
| Scgb1b29   | 0,26  | 0,742618851 | 0,37  | 0,774089094 | -0,2  | 0,693573235 | -0,08 | 0,849632852 | 0,07  | 0,939127163 |
| Scgb1b3    | 0,3   | 0,770347758 | 0,03  | 0,969019461 | -0,4  | 0,551502991 | 0,29  | 0,459231202 | 0,37  | 0,516531367 |
| Scgb1b30   | -0,07 | 0,925510521 | -0,41 | 0,626130765 | -0,03 | 0,979791644 | 0,08  | 0,889401797 | 0,28  | 0,658102749 |

|             |       |             |       |             |       |             |       |             |       |             |
|-------------|-------|-------------|-------|-------------|-------|-------------|-------|-------------|-------|-------------|
| Scgb1c1     | 0,12  | 0,89395175  | 0,12  | 0,777746794 | 0,11  | 0,876155012 | -0,03 | 0,945086901 | 0,14  | 0,844842508 |
| Scgb2b10    | 0,03  | 0,962810563 | 0,02  | 0,990052916 | 0,08  | 0,916403684 | -0,12 | 0,737607953 | -0,16 | 0,776025316 |
| Scgb2b11    | -0,03 | 0,958535933 | -0,03 | 0,979551751 | -0,07 | 0,921207094 | -0,26 | 0,471405206 | -0,3  | 0,563077271 |
| Scgb2b12    | 0,1   | 0,854362032 | 0,2   | 0,670629152 | -0,13 | 0,841669036 | -0,21 | 0,602118831 | 0,14  | 0,834295448 |
| Scgb2b19    | 0,33  | 0,489940108 | 0,06  | 0,937377463 | 0,07  | 0,909963525 | 0,01  | 0,985897275 | 0,04  | 0,960774794 |
| Scgb2b2     | 0,17  | 0,779331628 | 0,08  | 0,861862086 | 0,09  | 0,904057901 | -0,06 | 0,90213506  | -0,02 | 0,980961333 |
| Scgb2b20    | -0,05 | 0,942440481 | 0,18  | 0,741939956 | -0,09 | 0,887630371 | 0,06  | 0,897469459 | 0,32  | 0,632665453 |
| Scgb2b21    | 0,08  | 0,955394263 | -0,3  | 0,648582774 | 0,11  | 0,943144399 | 0,16  | 0,872022622 | -0,04 | 0,980945466 |
| Scgb2b23-ps | 0,43  | 0,287300833 | -0,03 | 0,954699934 | -0,12 | 0,859198005 | 0,04  | 0,926704232 | 0,23  | 0,692565666 |
| Scgb2b24    | 0,26  | 0,639070738 | 0,49  | 0,463954617 | -0,14 | 0,846795397 | -0,75 | 0,097916018 | -0,24 | 0,78960943  |
| Scgb2b26    | 0,06  | 0,94326605  | 0,09  | 0,841184864 | -0,25 | 0,705422471 | 0,09  | 0,886903189 | -0,06 | 0,948935854 |
| Scgb2b27    | 0,06  | 0,919567534 | -0,21 | 0,727238755 | -0,11 | 0,852922027 | -0,01 | 0,987977078 | -0,06 | 0,953764773 |
| Scgb2b3     | -0,21 | 0,756935263 | -0,05 | 0,983071427 | -0,1  | 0,894239558 | -0,01 | 0,995530123 | 0,31  | 0,706246121 |
| Scgb2b6     | -0,19 | 0,666546952 | 0,01  | 0,996105203 | 0,11  | 0,849328168 | -0,12 | 0,768880868 | 0,07  | 0,938825649 |
| Scgb2b7     | 0,03  | 0,973883276 | 0,13  | 0,775914311 | -0,06 | 0,932932843 | 0,01  | 0,979039536 | 0,08  | 0,915067495 |
| Scgb3a1     | -0,12 | 0,831697563 | 0,46  | 0,611350322 | 0,24  | 0,830336321 | 0,34  | 0,415968391 | -0,17 | 0,88451997  |
| Scgb3a2     | 0,17  | 0,66961506  | 0,08  | 0,916042399 | -0,29 | 0,479037325 | -0,03 | 0,958589414 | 0,25  | 0,725387944 |
| Scgn        | -0,03 | 0,971874175 | -0,17 | 0,813558323 | 0,17  | 0,75990504  | 0,49  | 0,331328372 | 0,35  | 0,636784137 |
| Schip1      | 0,27  | 0,724954186 | -0,08 | 0,88928164  | -0,54 | 0,471873683 | -0,31 | 0,403368451 | 0     | 0,997856047 |
| Scimp       | -0,01 | 0,986646568 | 0,43  | 0,489673761 | 0,55  | 0,772397144 | -0,32 | 0,736730464 | -0,04 | 0,97798269  |
| Scin        | 0,23  | 0,665460488 | -0,23 | 0,808498635 | -0,04 | 0,970530887 | -5,22 | 0,007738248 | 0,36  | 0,811321326 |
| Scit1       | -0,65 | 0,505856084 | -0,71 | 0,257624607 | 0,09  | 0,941860347 | -0,45 | 0,283477648 | 0,23  | 0,701852402 |
| Scly        | 0,04  | 0,967892992 | 0,35  | 0,494161701 | -0,2  | 0,795808461 | -0,2  | 0,709570719 | 0,25  | 0,709567735 |
| Scmh1       | -0,35 | 0,420942329 | -0,06 | 0,948409105 | 0,45  | 0,71593256  | -0,05 | 0,919668684 | -0,45 | 0,447304786 |
| Scml1       | 0,12  | 0,792090882 | -0,12 | 0,808222835 | 0,06  | 0,937019902 | 0,06  | 0,882842038 | 0,23  | 0,677075294 |
| Scml2       | -0,22 | 0,785669218 | -0,25 | 0,758114521 | -0,52 | 0,504503311 | 0,03  | 0,985643296 | 0,17  | 0,931519966 |
| Scml4       | 0,02  | 0,980913066 | 0,26  | 0,791426435 | -0,21 | 0,772782651 | -0,1  | 0,89753062  | -0,04 | 0,977991682 |
| Scn10a      | 0,05  | 0,962399085 | -0,05 | 0,977463004 | -0,07 | 0,962766843 | -0,13 | 0,827640111 | -0,13 | 0,91339829  |
| Scn11a      | -0,19 | 0,868869184 | -0,45 | 0,765974961 | 0,23  | 0,747599709 | 1,14  | 0,216231559 | -0,05 | 0,976045403 |
| Scn1a       | -0,02 | 0,972701787 | 0,17  | 0,7122758   | 0     | 0,99879674  | -0,33 | 0,429089873 | -0,25 | 0,728388857 |
| Scn1b       | -0,04 | 0,94386877  | -0,03 | 0,966705367 | 0,19  | 0,861837147 | 0,27  | 0,581624426 | 0,39  | 0,508679973 |
| Scn2a1      | 0,5   | 0,557114011 | 0,51  | 0,7219659   | 0,01  | 0,993549655 | -0,65 | 0,515278058 | -0,81 | 0,339766572 |
| Scn2b       | 0,34  | 0,519575568 | 0,13  | 0,839789639 | 0,06  | 0,943019545 | -0,04 | 0,931428395 | 0,32  | 0,646331126 |
| Scn3a       | 0,16  | 0,932324918 | 0,19  | 0,876406533 | -0,48 | 0,846296601 | 0,07  | 0,952768654 | -0,04 | 0,983613958 |
| Scn3b       | -0,64 | 0,512464903 | 0,11  | 0,905051067 | -0,03 | 0,99129124  | 0,41  | 0,342248018 | 0,34  | 0,645655318 |

|          |       |             |       |             |       |             |       |             |       |             |
|----------|-------|-------------|-------|-------------|-------|-------------|-------|-------------|-------|-------------|
| Scn4a    | -0,35 | 0,776721795 | -0,4  | 0,732044571 | 0,15  | 0,824306509 | 0,54  | 0,634381347 | 0,11  | 0,956013361 |
| Scn4b    | -0,09 | 0,876019664 | -0,09 | 0,855632384 | -0,22 | 0,8271738   | -0,13 | 0,835214439 | -0,07 | 0,970465809 |
| Scn5a    | 0,04  | 0,972682121 | 0,05  | 0,954948291 | -0,15 | 0,867589536 | -0,12 | 0,81676014  | 0,07  | 0,940092696 |
| Scn7a    | -0,23 | 0,896249068 | -0,38 | 0,537510632 | -0,2  | 0,885556448 | -2,01 | 0,078997606 | -1,79 | 0,116694427 |
| Scn8a    | 0,19  | 0,765643907 | 0,05  | 0,977204386 | 0,16  | 0,878647433 | 0,07  | 0,921731995 | -0,35 | 0,525946249 |
| Scn9a    | -0,27 | 0,692548499 | 0,41  | 0,548858367 | -0,15 | 0,843664699 | 0,03  | 0,968370516 | -0,11 | 0,915067495 |
| Scnm1    | 0,12  | 0,874467978 | 0,21  | 0,655302559 | 0,42  | 0,46668176  | -0,19 | 0,830992391 | -0,04 | 0,980945466 |
| Scnn1a   | 0,5   | 0,459857102 | -0,43 | 0,649542145 | -0,32 | 0,753193013 | 0,06  | 0,965565431 | 0,54  | 0,616321633 |
| Scnn1b   | 0,27  | 0,719691888 | 0,5   | 0,579364821 | -0,08 | 0,926356007 | 0,37  | 0,527184341 | -0,28 | 0,661778348 |
| Scnn1g   | 0,29  | 0,660215768 | 0,03  | 0,965039248 | -0,33 | 0,487127071 | -0,3  | 0,441362644 | -0,38 | 0,626846143 |
| Sco1     | 0,09  | 0,900646628 | 0,34  | 0,872388615 | 0,28  | 0,688126003 | -0,44 | 0,263376759 | -0,36 | 0,606567117 |
| Sco2     | -0,13 | 0,827055517 | -0,21 | 0,765705056 | 0,09  | 0,95106142  | 0     | 1           | 0,02  | 0,983713871 |
| Scoc     | 0,02  | 0,98297164  | 0,47  | 0,290322318 | 0,07  | 0,966647226 | -0,3  | 0,498666476 | 0,23  | 0,730000542 |
| Scp2     | -0,3  | 0,645120888 | -1,03 | 0,177712345 | 0,65  | 0,348136125 | 0,2   | 0,799835488 | -0,54 | 0,411909918 |
| Scp2d1   | 0,27  | 0,617280733 | 0,03  | 0,988653513 | 0,17  | 0,8128837   | -0,02 | 0,976024748 | 0,18  | 0,825408041 |
| Scpep1   | 0,89  | 0,27550648  | 0,34  | 0,529410744 | -0,58 | 0,550952561 | 0,53  | 0,499557595 | 0,37  | 0,726984366 |
| Scpep1os | 0,36  | 0,547519398 | 0,11  | 0,872388615 | 0,23  | 0,673807963 | -0,16 | 0,853212517 | -0,06 | 0,959398085 |
| Scrg1    | -0,02 | 0,970938013 | 0,06  | 0,928134372 | 0,14  | 0,906097666 | 0,08  | 0,870926412 | 0,06  | 0,957620856 |
| Scrib    | -0,29 | 0,44306682  | 0,11  | 0,843961495 | 0,13  | 0,833720453 | -0,45 | 0,206540971 | -0,47 | 0,305995061 |
| Scrn1    | -0,01 | 0,996219097 | 0,08  | 0,940046211 | -0,51 | 0,370554673 | -2,98 | 0,017662145 | -0,92 | 0,324093515 |
| Scrn2    | -1,23 | 0,058225809 | 0,06  | 0,959209847 | 0,21  | 0,787094995 | -0,42 | 0,580513589 | -1,18 | 0,296825623 |
| Scrn3    | -0,37 | 0,808947569 | -0,3  | 0,8807671   | -0,03 | 0,993379272 | -1,16 | 0,116267286 | -0,35 | 0,764523698 |
| Scrt1    | 0,45  | 0,292713469 | -0,18 | 0,764157038 | -0,12 | 0,870263371 | 0,08  | 0,848431901 | 0,18  | 0,792732275 |
| Scrt2    | 0,3   | 0,471408054 | -0,03 | 0,9860901   | -0,29 | 0,568619313 | 0,18  | 0,67870581  | -0,1  | 0,904636459 |
| Sct      | -0,08 | 0,876523917 | 0,23  | 0,583764309 | -0,05 | 0,953645406 | 0,17  | 0,793099857 | -0,13 | 0,871038748 |
| Sctr     | -0,17 | 0,714662474 | 0,13  | 0,85743617  | -0,03 | 0,982305856 | -0,49 | 0,300989263 | -0,35 | 0,580683228 |
| Scube1   | 0,12  | 0,892823025 | -0,45 | 0,586770731 | -0,44 | 0,465936592 | -1,01 | 0,101112503 | -0,93 | 0,083660756 |
| Scube2   | -0,25 | 0,768809729 | 0,01  | 0,998649612 | 0,24  | 0,719386001 | 0,25  | 0,577799811 | -0,05 | 0,95985938  |
| Scube3   | 0,06  | 0,950669622 | -0,4  | 0,728669599 | 0,46  | 0,33075776  | -0,33 | 0,656436463 | -0,82 | 0,122922652 |
| Scx      | 0,06  | 0,914090929 | -0,06 | 0,905535217 | 0,04  | 0,959596019 | -0,05 | 0,932800758 | 0     | 0,999775166 |
| Scyl1    | -0,29 | 0,474382977 | -0,19 | 0,683062799 | 0,39  | 0,324705558 | 0,08  | 0,854188679 | -0,45 | 0,338653241 |
| Scyl2    | -0,26 | 0,553407361 | 0,25  | 0,641804702 | 0,82  | 0,435556279 | 0,51  | 0,2423686   | -0,16 | 0,832848337 |
| Scyl3    | 0,03  | 0,978017159 | 0,02  | 0,990052916 | 0,24  | 0,733092626 | -0,31 | 0,466887908 | -0,37 | 0,593148264 |
| Sdad1    | 0     | 0,999288019 | -0,15 | 0,83754738  | -0,48 | 0,50984952  | 0,76  | 0,117192962 | -0,03 | 0,983469081 |
| Sdc1     | -0,2  | 0,842618646 | 0,14  | 0,882589938 | 1,3   | 0,045278475 | -0,38 | 0,553928159 | -0,39 | 0,481762055 |

|         |       |             |       |             |       |             |       |             |       |             |
|---------|-------|-------------|-------|-------------|-------|-------------|-------|-------------|-------|-------------|
| Sdc2    | -0,1  | 0,882500171 | 0,04  | 0,980518468 | -0,41 | 0,795128728 | -1,72 | 0,065746684 | -1,22 | 0,178761055 |
| Sdc3    | 0,02  | 0,976594941 | 0,13  | 0,819120994 | 0,09  | 0,917694073 | 0,38  | 0,287840988 | 0,21  | 0,703079104 |
| Sdc4    | 0,85  | 0,092850129 | 0,22  | 0,796137964 | 0,26  | 0,698791125 | -0,97 | 0,34243541  | -0,22 | 0,861236592 |
| Sdcbp   | -0,01 | 0,984759626 | -0,03 | 0,962617743 | 0,02  | 0,98722236  | 0,97  | 0,03497605  | 0,72  | 0,117935577 |
| Sdcbp2  | 1,53  | 0,058225809 | 0,56  | 0,459417799 | -0,55 | 0,33075776  | 1,46  | 0,061981525 | -0,39 | 0,79248985  |
| Sdccag3 | 0,06  | 0,925510521 | 0,03  | 0,975103597 | 0,18  | 0,799597321 | 0,38  | 0,267249658 | -0,02 | 0,983494749 |
| Sdccag8 | -0,04 | 0,970755497 | -0,55 | 0,677981098 | 0,2   | 0,87140695  | 0,23  | 0,824242551 | -0,08 | 0,955499131 |
| Sde2    | -0,22 | 0,653384262 | 0,18  | 0,749674871 | 0,1   | 0,909963525 | -0,12 | 0,762307359 | 0,03  | 0,969994712 |
| Sdf2    | 0,13  | 0,733717057 | 0,24  | 0,574343122 | 0,26  | 0,630220602 | 0,09  | 0,840657538 | 0,25  | 0,653769438 |
| Sdf2l1  | 0,5   | 0,467257621 | 0,15  | 0,880892852 | 0,28  | 0,809137779 | 1,15  | 0,045809254 | 0,99  | 0,16021172  |
| Sdf4    | -0,01 | 0,991789918 | 0,29  | 0,457889449 | 0,42  | 0,376628542 | -1,07 | 0,017463671 | -0,5  | 0,307063823 |
| Sdha    | -0,34 | 0,46271144  | -0,06 | 0,898952381 | 0,27  | 0,694206736 | -0,32 | 0,428855564 | -0,09 | 0,91314596  |
| Sdhaf1  | -0,39 | 0,557114011 | -0,08 | 0,910688765 | 0,66  | 0,333179926 | -0,21 | 0,56551441  | -0,18 | 0,804809514 |
| Sdhaf2  | 0,46  | 0,237786455 | -0,01 | 0,991507752 | -0,08 | 0,94665439  | 0,05  | 0,93129706  | 0,02  | 0,983429033 |
| Sdhaf3  | -0,21 | 0,890205603 | 0,37  | 0,675325246 | -0,7  | 0,440550754 | 0,54  | 0,351707132 | 0,3   | 0,59705803  |
| Sdhaf4  | -0,03 | 0,965703244 | -0,06 | 0,961370411 | -0,08 | 0,922318683 | 0,57  | 0,467341604 | 0,08  | 0,951236192 |
| Sdhab   | -0,15 | 0,728643996 | -0,18 | 0,712500402 | 0,5   | 0,504301089 | 0,33  | 0,388065491 | -0,11 | 0,876418697 |
| Sdhc    | -0,4  | 0,640002115 | -0,05 | 0,96095671  | 1,3   | 0,433353965 | 0,03  | 0,962167676 | -0,8  | 0,321751898 |
| Sdhd    | -0,05 | 0,932324918 | -0,1  | 0,891104012 | 0,41  | 0,543291636 | 0,38  | 0,273752732 | 0,18  | 0,791840213 |
| Sdk1    | -0,13 | 0,84377795  | -0,23 | 0,703923817 | -0,21 | 0,859389184 | -0,25 | 0,642212952 | -0,44 | 0,399112361 |
| Sdk2    | 0,01  | 0,995938676 | -0,52 | 0,324289795 | 0,04  | 0,973732268 | 0,09  | 0,839567244 | -0,01 | 0,992022739 |
| Sdpr    | -0,71 | 0,189684245 | -0,43 | 0,325242663 | 0,02  | 0,992919703 | -0,67 | 0,078439734 | -1,14 | 0,036486741 |
| Sdr16c5 | 0,43  | 0,472847723 | -0,55 | 0,651942972 | -0,06 | 0,969262382 | 0,39  | 0,545758277 | -0,36 | 0,765327693 |
| Sdr16c6 | 0,14  | 0,744352714 | 0,47  | 0,274378139 | -0,33 | 0,478619361 | -0,3  | 0,331166732 | 0,2   | 0,76521225  |
| Sdr39u1 | -0,42 | 0,295218179 | -0,48 | 0,531518093 | 0,03  | 0,985977985 | 0,21  | 0,740434535 | -0,19 | 0,735152891 |
| Sdr42e1 | -0,03 | 0,976574175 | -0,3  | 0,667684858 | 0,28  | 0,789969951 | -0,27 | 0,680951303 | -0,17 | 0,883370317 |
| Sdr9c7  | -0,14 | 0,859044359 | 0,52  | 0,316777126 | -0,09 | 0,940550094 | 0,08  | 0,87407074  | 0,03  | 0,982175252 |
| Sds     | 0,33  | 0,672934635 | 0,28  | 0,801258918 | 0,01  | 0,996260936 | -0,17 | 0,808985118 | 0,1   | 0,905842374 |
| Sdsl    | 0,08  | 0,921306075 | 0,07  | 0,932390453 | -0,13 | 0,830820153 | 0     | 1           | 0,08  | 0,948860137 |
| Sebox   | 0,2   | 0,62872508  | -0,32 | 0,581798558 | 0,23  | 0,736310979 | 0,37  | 0,318172917 | 0,21  | 0,682134021 |
| Sec1    | 0,61  | 0,149941264 | -0,06 | 0,938088718 | -0,21 | 0,745728474 | -1,07 | 0,196308979 | -0,46 | 0,619593453 |
| Sec11a  | -0,05 | 0,923180948 | 0,21  | 0,707524747 | 0,09  | 0,917672398 | 0,49  | 0,338611878 | 0,45  | 0,45660227  |
| Sec11c  | 0,99  | 0,113564786 | 0,58  | 0,208373622 | 0,12  | 0,863840715 | 0,55  | 0,511016709 | 0,22  | 0,843846988 |
| Sec13   | -0,07 | 0,919567534 | -0,39 | 0,383504117 | 0,42  | 0,428274175 | 1,07  | 0,025644889 | 0,33  | 0,513517573 |
| Sec14l1 | -0,53 | 0,326862574 | -0,6  | 0,173741746 | 0,59  | 0,304667579 | 0,03  | 0,96100293  | -1,33 | 0,029592183 |

|           |       |             |       |             |       |             |       |             |       |             |
|-----------|-------|-------------|-------|-------------|-------|-------------|-------|-------------|-------|-------------|
| Sec14I2   | -0,71 | 0,455907331 | 0,1   | 0,893842035 | 0,32  | 0,694941328 | -0,05 | 0,943864463 | -0,68 | 0,267677873 |
| Sec14I3   | 0,27  | 0,60879435  | 0,16  | 0,88741189  | -0,23 | 0,821229302 | -0,16 | 0,871321233 | -0,35 | 0,712786855 |
| Sec14I4   | 0,06  | 0,927099161 | 0,16  | 0,88741189  | -0,42 | 0,56948206  | -0,05 | 0,966701307 | 0,03  | 0,978981442 |
| Sec14I5   | -0,1  | 0,868854341 | 0,34  | 0,723566168 | -0,2  | 0,71773035  | 0,15  | 0,668558804 | 0,22  | 0,689778199 |
| Sec16a    | -0,1  | 0,905410816 | 0,05  | 0,946860028 | 0,09  | 0,906709737 | 0,36  | 0,4272539   | -0,29 | 0,678906817 |
| Sec16b    | -0,12 | 0,874838456 | -0,11 | 0,907169389 | -0,36 | 0,46668176  | 0,18  | 0,845813504 | -0,26 | 0,844407367 |
| Sec22a    | -0,28 | 0,721797378 | -0,14 | 0,870590313 | 0,78  | 0,460914763 | 0,92  | 0,30435522  | 0,22  | 0,869403669 |
| Sec22b    | -0,11 | 0,869225685 | -0,09 | 0,896187678 | 0,4   | 0,56948206  | 0,76  | 0,146941046 | -0,12 | 0,935812103 |
| Sec22c    | -0,13 | 0,829299665 | -0,24 | 0,857388191 | 0,18  | 0,727262258 | -0,17 | 0,712028135 | -0,02 | 0,982779069 |
| Sec23a    | -0,8  | 0,437618775 | -0,17 | 0,811280211 | 1,03  | 0,098405341 | 1,86  | 0,045030572 | 0,27  | 0,825680274 |
| Sec23b    | -0,03 | 0,966775766 | -0,25 | 0,814499098 | 0,53  | 0,27661034  | 0,66  | 0,093785342 | 0,09  | 0,906338603 |
| Sec23ip   | -0,14 | 0,830575431 | -0,4  | 0,370805218 | 0,52  | 0,332958465 | 0,82  | 0,467337385 | 0,15  | 0,931519966 |
| Sec24a    | 0,13  | 0,843029805 | 0,16  | 0,740618526 | 0,04  | 0,961237339 | 0,75  | 0,162042319 | -0,22 | 0,777437869 |
| Sec24b    | 0,33  | 0,563096179 | 0,32  | 0,528720196 | -0,37 | 0,532446034 | 0,29  | 0,430800904 | 0,36  | 0,440709829 |
| Sec24c    | -0,25 | 0,666405577 | -0,18 | 0,664502462 | 0,16  | 0,81425417  | 0,63  | 0,182485182 | -0,07 | 0,947437555 |
| Sec24d    | -0,02 | 0,986795639 | -0,32 | 0,465474732 | 0,3   | 0,714583536 | 2,15  | 0,020614785 | -0,61 | 0,411909918 |
| Sec31a    | -0,16 | 0,724976228 | -0,29 | 0,438549879 | 0,13  | 0,867543859 | 1     | 0,033579739 | -0,26 | 0,62872947  |
| Sec31b    | 0,14  | 0,869565514 | 0,1   | 0,920313484 | 0,19  | 0,885042765 | -0,45 | 0,24221717  | -0,17 | 0,802027955 |
| Sec61a1   | -0,17 | 0,773003567 | -0,24 | 0,561842393 | 0,01  | 0,991456043 | 0,97  | 0,106060853 | -0,1  | 0,918865935 |
| Sec61a2   | -0,37 | 0,496008309 | -0,16 | 0,761013593 | -0,01 | 0,994648716 | 0,39  | 0,367482816 | 0,35  | 0,545166604 |
| Sec61b    | -0,16 | 0,68161851  | -0,18 | 0,671319666 | 0,53  | 0,188458261 | 0,37  | 0,28515005  | -0,21 | 0,701198892 |
| Sec61g    | 2,08  | 0,015937556 | 1,17  | 0,096881344 | -1,07 | 0,259550802 | 0,62  | 0,30409281  | 1,42  | 0,032750472 |
| Sec62     | 0,16  | 0,734622176 | -0,2  | 0,747707816 | -0,23 | 0,804607903 | -0,18 | 0,689014604 | 0,22  | 0,691243011 |
| Sec63     | 0,23  | 0,684477808 | -0,19 | 0,65041955  | 0,39  | 0,543309542 | 0,14  | 0,825294146 | 0,06  | 0,954316248 |
| Secisbp2  | -0,12 | 0,808882471 | -0,31 | 0,454735704 | 0,1   | 0,906232478 | 0,32  | 0,618209904 | -0,08 | 0,940125698 |
| Secisbp2l | 0,05  | 0,961332081 | 0,36  | 0,457889449 | -0,63 | 0,192747337 | -0,19 | 0,69558501  | 0,65  | 0,21224861  |
| Sectm1a   | 1,15  | 0,134634474 | 0,94  | 0,252172097 | -0,27 | 0,811424918 | -0,37 | 0,318097982 | 0,78  | 0,286600165 |
| Sectm1b   | 0,31  | 0,658350988 | 0,38  | 0,416087106 | -0,25 | 0,851593229 | -0,08 | 0,914828446 | 1,54  | 0,176186731 |
| Seh1l     | -0,06 | 0,909304056 | 0,13  | 0,856600114 | 0,03  | 0,973732268 | 0,19  | 0,751051801 | 0,39  | 0,612920986 |
| Sel1l     | -0,5  | 0,441176207 | -0,11 | 0,873107937 | -0,14 | 0,886000685 | 0,04  | 0,968266606 | 0,12  | 0,91314596  |
| Sel1I2    | -0,1  | 0,913778898 | -0,12 | 0,844832995 | -0,08 | 0,953255651 | 0,28  | 0,670673114 | 0,35  | 0,655814782 |
| Sel1I3    | 0,26  | 0,770273483 | -0,07 | 0,926353869 | 0,23  | 0,899867456 | -0,34 | 0,722307071 | -0,55 | 0,587199571 |
| Sele      | -1,67 | 0,059686542 | -1,89 | 0,087315688 | 1,33  | 0,158982279 | -0,18 | 0,873812847 | 0,08  | 0,958259949 |
| Selenbp2  | 0,63  | 0,430806119 | 0,51  | 0,643743213 | -0,45 | 0,7336481   | -0,2  | 0,914137643 | 0,53  | 0,728388857 |
| Selk      | 0,44  | 0,26597118  | 0,36  | 0,402393337 | 0,04  | 0,982305856 | -0,47 | 0,234549057 | 0,47  | 0,335268519 |

|        |       |             |       |             |       |             |       |             |       |             |
|--------|-------|-------------|-------|-------------|-------|-------------|-------|-------------|-------|-------------|
| Sell   | 0,03  | 0,984747015 | 0,16  | 0,88319997  | -0,61 | 0,527962527 | 0,34  | 0,703281567 | 0,11  | 0,914176188 |
| Selm   | -0,47 | 0,210544026 | -0,47 | 0,228649557 | 0,5   | 0,411571874 | -0,86 | 0,028546747 | -0,33 | 0,548884611 |
| Selo   | -0,21 | 0,754698324 | 0,34  | 0,531718087 | 0,07  | 0,955586257 | -0,7  | 0,468562522 | -0,12 | 0,933759514 |
| Selp   | -0,39 | 0,617280733 | -0,62 | 0,217093794 | 1,02  | 0,229663854 | 0,93  | 0,474125947 | 0,46  | 0,802618378 |
| Selpg  | 0,49  | 0,295694434 | 0,26  | 0,680709276 | -0,8  | 0,565711825 | 0,07  | 0,931477012 | 0,44  | 0,549785483 |
| Selt   | -0,11 | 0,800851935 | 0     | 1           | 0,07  | 0,939991258 | 0,23  | 0,577432583 | 0,08  | 0,919867638 |
| Sema3a | 2,32  | 0,053226128 | 1,57  | 0,087315688 | -1,24 | 0,116663281 | 3,01  | 0,004331967 | -0,29 | 0,75695866  |
| Sema3b | 0,26  | 0,799493751 | -0,38 | 0,466665076 | 0,16  | 0,813287877 | -0,24 | 0,461824013 | -0,39 | 0,548871936 |
| Sema3c | 0,2   | 0,797727349 | 0,11  | 0,916496897 | 0,6   | 0,474169312 | -0,9  | 0,306193448 | -0,61 | 0,561919796 |
| Sema3d | -0,41 | 0,775296013 | 0,11  | 0,819802664 | -0,21 | 0,920828015 | -6,25 | 0,00201305  | -0,32 | 0,664273475 |
| Sema3e | 0,21  | 0,795659022 | -0,02 | 0,980309105 | 0,05  | 0,970939073 | 0,3   | 0,561953814 | 0,23  | 0,742982183 |
| Sema3f | -0,18 | 0,704641551 | -0,31 | 0,493082442 | 0,11  | 0,870377336 | 0,21  | 0,638148039 | -0,33 | 0,553354035 |
| Sema3g | -1,09 | 0,074890017 | -0,1  | 0,885546436 | 0,31  | 0,736252823 | -2,88 | 0,004331967 | -0,06 | 0,947559952 |
| Sema4a | 1,13  | 0,189684245 | 0,43  | 0,622161495 | 0,03  | 0,991456043 | -0,35 | 0,654230107 | -0,13 | 0,91252831  |
| Sema4b | -0,32 | 0,66331039  | 0,14  | 0,73623784  | 0,58  | 0,449013439 | -0,18 | 0,742107448 | -0,15 | 0,881613493 |
| Sema4c | -0,9  | 0,079135571 | 0,16  | 0,781665479 | 0,26  | 0,675235188 | -0,7  | 0,159464405 | -0,08 | 0,935100205 |
| Sema4d | -0,39 | 0,613959152 | -0,26 | 0,893276569 | 0,24  | 0,749254864 | -0,31 | 0,324103294 | 0,39  | 0,443096537 |
| Sema4f | -0,14 | 0,898116888 | -0,24 | 0,613344994 | 0,31  | 0,513446928 | 0,17  | 0,758588473 | -0,07 | 0,947559952 |
| Sema4g | 0,12  | 0,869068658 | 0,29  | 0,786405071 | 0,45  | 0,361580981 | 0,15  | 0,818711104 | -0,02 | 0,987146256 |
| Sema5a | -0,38 | 0,750634506 | -0,13 | 0,928134372 | -0,22 | 0,804607903 | -3,17 | 0,031574061 | -0,26 | 0,887732548 |
| Sema5b | -0,06 | 0,938538909 | 0,08  | 0,911706808 | 0,09  | 0,94665439  | -1,07 | 0,156400815 | -0,11 | 0,934242963 |
| Sema6a | -0,61 | 0,572825051 | 0,46  | 0,568787035 | -0,08 | 0,959650277 | -0,03 | 0,983861729 | 0,15  | 0,894192218 |
| Sema6b | -0,61 | 0,389763388 | 0,03  | 0,977618172 | 0,38  | 0,467503988 | -0,52 | 0,163529439 | -0,64 | 0,201193058 |
| Sema6c | -0,19 | 0,660979798 | -0,47 | 0,483436169 | 0,49  | 0,598179126 | 0,13  | 0,84945025  | -0,35 | 0,705486676 |
| Sema6d | -0,35 | 0,493929    | -0,5  | 0,463174374 | 0,46  | 0,674457491 | 1,64  | 0,007685776 | -0,3  | 0,623304657 |
| Sema7a | 0,22  | 0,55640978  | 0,08  | 0,90164068  | -0,65 | 0,140134873 | 0,41  | 0,425642055 | 0,03  | 0,979392852 |
| Senp1  | -0,21 | 0,64621704  | -0,48 | 0,390751508 | -0,29 | 0,602259493 | 0,36  | 0,319385987 | 0     | 0,997254437 |
| Senp2  | 0,08  | 0,939308558 | 0,29  | 0,733191766 | -0,48 | 0,51912977  | 1,22  | 0,052531013 | 0,66  | 0,228932044 |
| Senp3  | -0,2  | 0,771261237 | -0,29 | 0,671319666 | 0,39  | 0,512312279 | 0,69  | 0,266016367 | 0,03  | 0,979392852 |
| Senp5  | -0,26 | 0,71347786  | 0,16  | 0,919873208 | -0,02 | 0,993379272 | 0,54  | 0,560223278 | 0,1   | 0,941241684 |
| Senp6  | -0,08 | 0,898572877 | 0,02  | 0,990133053 | -0,13 | 0,891636318 | 0,26  | 0,727187179 | 0,61  | 0,284898702 |
| Senp7  | -0,24 | 0,752808308 | 0,11  | 0,910193022 | 0,1   | 0,935978536 | -0,81 | 0,144520632 | -0,21 | 0,760657649 |
| Senp8  | -1,13 | 0,175830295 | -0,02 | 0,995205602 | 0,45  | 0,66170364  | -0,15 | 0,937278546 | 0,47  | 0,80222716  |
| Sep15  | -0,17 | 0,694699901 | -0,35 | 0,435489861 | 0,13  | 0,839921239 | 0,28  | 0,406031453 | -0,13 | 0,853774308 |
| Sephs1 | -0,52 | 0,642618049 | -0,25 | 0,834836889 | 0,56  | 0,436382905 | 0,85  | 0,250397828 | -0,43 | 0,696450271 |



|           |       |             |       |             |       |             |       |             |       |             |
|-----------|-------|-------------|-------|-------------|-------|-------------|-------|-------------|-------|-------------|
| Sephs2    | -0,31 | 0,478415881 | -0,28 | 0,726556693 | 0,23  | 0,691646302 | -0,03 | 0,973328764 | -0,03 | 0,983613958 |
| Sepn1     | -0,82 | 0,12369549  | -0,46 | 0,512441035 | 0,38  | 0,684455958 | 1,1   | 0,043778357 | -0,6  | 0,239898845 |
| Sepp1     | -0,27 | 0,466960111 | -0,4  | 0,480740776 | -0,27 | 0,796267539 | -0,94 | 0,031465633 | -0,41 | 0,371886965 |
| Sepsecs   | -0,86 | 0,316599006 | -0,23 | 0,781665479 | 0,17  | 0,903761147 | -0,07 | 0,958223234 | -0,09 | 0,960228355 |
| Sept1     | -0,45 | 0,376151377 | 0,29  | 0,606866408 | 0,79  | 0,378741497 | 0,86  | 0,241597107 | -0,12 | 0,937558003 |
| Sept10    | -0,72 | 0,295694434 | -0,74 | 0,276405631 | 0,61  | 0,259550802 | 1,68  | 0,467337385 | 0,21  | 0,95539912  |
| Sept11    | -0,3  | 0,512526936 | -0,47 | 0,244905942 | 0,51  | 0,515467334 | 0,51  | 0,11507816  | -0,3  | 0,549399334 |
| Sept12    | -0,17 | 0,783591449 | 0,11  | 0,896890904 | -0,19 | 0,845321518 | 0,2   | 0,659355324 | -0,19 | 0,78512653  |
| Sept14    | 0     | 0,998307191 | 0,1   | 0,909329669 | 0,14  | 0,816374369 | 0,03  | 0,963752888 | 0,03  | 0,977595378 |
| Sept2     | -0,22 | 0,56461489  | -0,05 | 0,934602811 | 0,03  | 0,976092199 | 0,6   | 0,231060059 | 0,29  | 0,66875229  |
| Sept3     | -0,06 | 0,958535933 | -0,29 | 0,609576972 | -0,08 | 0,93127773  | 0,03  | 0,961123444 | 0,07  | 0,932521789 |
| Sept4     | -0,25 | 0,54401985  | 0,31  | 0,641035273 | 0,22  | 0,802795561 | 0,51  | 0,439926321 | 0,22  | 0,795033998 |
| Sept5     | 0,34  | 0,715493304 | -0,37 | 0,768528991 | 0,37  | 0,744387748 | -0,78 | 0,426802119 | -1,02 | 0,276856796 |
| Sept6     | 0,32  | 0,614264906 | -0,76 | 0,345409693 | 0,41  | 0,61483831  | -0,06 | 0,942739047 | -0,64 | 0,338653241 |
| Sept7     | 0,04  | 0,959218841 | -0,15 | 0,882589938 | 0,02  | 0,990699622 | 0,48  | 0,433213913 | 0,21  | 0,747828814 |
| Sept8     | -0,37 | 0,355622782 | -0,2  | 0,781665479 | 0,14  | 0,805083999 | 0,61  | 0,380438463 | -0,23 | 0,824727805 |
| Sept9     | -0,05 | 0,949541186 | 0,42  | 0,739066161 | 0,18  | 0,900287506 | 0,55  | 0,504059886 | -0,34 | 0,635285358 |
| Sepw1     | -0,05 | 0,935203545 | 0,26  | 0,512422775 | -0,35 | 0,500849254 | 0,37  | 0,35112311  | 0,51  | 0,3001102   |
| Serac1    | 0,34  | 0,375331444 | -0,05 | 0,977005012 | 0,3   | 0,749254864 | -0,51 | 0,586887461 | 0,35  | 0,728388857 |
| Serbp1    | -0,15 | 0,74140155  | -0,08 | 0,900953151 | 0,29  | 0,502960136 | 0,4   | 0,312323585 | 0,27  | 0,59705803  |
| Serf1     | -0,39 | 0,856959665 | -0,09 | 0,929324024 | 0,36  | 0,700061351 | 0,71  | 0,09620225  | 0     | 0,997856047 |
| Serf2     | -0,36 | 0,616144081 | 0,12  | 0,810875398 | 0,13  | 0,87140695  | 0,74  | 0,086671863 | -0,11 | 0,912890826 |
| Sergef    | -0,04 | 0,960720096 | -0,45 | 0,370515616 | 0,57  | 0,273709088 | 0,33  | 0,592590482 | -0,27 | 0,733488478 |
| Serhl     | -0,44 | 0,24274445  | -0,08 | 0,900801202 | -0,24 | 0,703647945 | 0,17  | 0,739388845 | -0,23 | 0,804405787 |
| Serinc1   | -0,09 | 0,893750311 | -0,25 | 0,605851161 | 0,19  | 0,776071062 | -0,24 | 0,691869626 | 0,2   | 0,80222716  |
| Serinc2   | -0,68 | 0,146504462 | -0,24 | 0,708156013 | 0,36  | 0,591520086 | 0,12  | 0,874701048 | -0,38 | 0,559721978 |
| Serinc3   | 0,15  | 0,680863515 | 0,14  | 0,732847182 | -0,34 | 0,435556279 | -0,37 | 0,221934349 | 0,03  | 0,967688856 |
| Serinc4   | 0,37  | 0,287168969 | -0,15 | 0,930849936 | -0,09 | 0,952888594 | -0,64 | 0,22873376  | -0,91 | 0,213976146 |
| Serinc5   | -0,61 | 0,402943227 | -0,36 | 0,557112468 | -0,16 | 0,911506558 | 0,67  | 0,468740502 | -0,92 | 0,550083777 |
| Serp1     | 0,03  | 0,970078059 | -0,22 | 0,700246835 | 0,24  | 0,736422567 | 1,42  | 0,012175785 | 0,04  | 0,96334532  |
| Serp2     | -0,04 | 0,97042066  | 0,2   | 0,840420543 | -0,06 | 0,967767582 | -1,21 | 0,04687876  | -0,21 | 0,80222716  |
| Serpina10 | -0,22 | 0,650609778 | -0,13 | 0,831685312 | -0,06 | 0,944078985 | 0,23  | 0,625402975 | 0,55  | 0,386881171 |
| Serpina11 | 0,22  | 0,717407143 | 0,45  | 0,599021965 | 0,13  | 0,862441091 | 0     | 0,996714438 | -0,38 | 0,46348763  |
| Serpina12 | 0,12  | 0,814888638 | 0,25  | 0,555906531 | -0,12 | 0,853753298 | -0,16 | 0,770163338 | -0,23 | 0,758052028 |
| Serpina16 | -0,05 | 0,927866076 | 0,15  | 0,728434379 | -0,09 | 0,908370367 | -0,01 | 0,991725555 | -0,06 | 0,938265452 |

|              |       |             |       |             |       |             |       |             |       |             |
|--------------|-------|-------------|-------|-------------|-------|-------------|-------|-------------|-------|-------------|
| Serpina1b    | 0,82  | 0,363171532 | 0,57  | 0,585595533 | -0,47 | 0,691646302 | -2,85 | 0,022548301 | 0,19  | 0,866231214 |
| Serpina1c    | 0,64  | 0,483299704 | -0,41 | 0,842663656 | -0,47 | 0,420043356 | 0,13  | 0,899335603 | -0,19 | 0,895464476 |
| Serpina1d    | 0,25  | 0,652819827 | -0,61 | 0,662134711 | 0,11  | 0,890842571 | -1,98 | 0,131537364 | -0,18 | 0,943430391 |
| Serpina1e    | -0,37 | 0,573607031 | -0,34 | 0,785244931 | 0,23  | 0,850262405 | -1,15 | 0,137246696 | -0,45 | 0,571246707 |
| Serpina1f    | -0,24 | 0,81629489  | 0,25  | 0,675584117 | -0,1  | 0,899913569 | -0,37 | 0,407097145 | -0,03 | 0,982813638 |
| Serpina3a    | 0     | 0,9974715   | 0,3   | 0,619732488 | 0,09  | 0,894229514 | 0,18  | 0,594365292 | 0,12  | 0,885777129 |
| Serpina3b    | -0,34 | 0,61102335  | 0,08  | 0,92856048  | -0,27 | 0,751090942 | -0,47 | 0,423775123 | -0,36 | 0,550083777 |
| Serpina3c    | -0,42 | 0,363930021 | -0,56 | 0,264702741 | -0,32 | 0,706029076 | 0,13  | 0,726158589 | -0,07 | 0,953297732 |
| Serpina3f    | 1,98  | 0,238140392 | 2,02  | 0,051918634 | -4,53 | 3,53365E-05 | 3,24  | 0,047758131 | 5,12  | 0,003331129 |
| Serpina3g    | 2,74  | 0,05571259  | 2,31  | 0,060547441 | -3,21 | 0,000959018 | 0,99  | 0,576482361 | 3,8   | 0,021111626 |
| Serpina3h    | 0,92  | 0,194613044 | 0,22  | 0,756778611 | -1,13 | 0,245030155 | -0,18 | 0,837974367 | 1,52  | 0,053907225 |
| Serpina3i    | 0,37  | 0,837491089 | 0,53  | 0,724572503 | -1,41 | 0,324705558 | 1,2   | 0,104747217 | 2,42  | 0,013202628 |
| Serpina3j    | -0,03 | 0,979574398 | 0,1   | 0,884434898 | 0,04  | 0,963195558 | 0,31  | 0,48871055  | 0,66  | 0,182198222 |
| Serpina3k    | -0,04 | 0,949362206 | 0,12  | 0,860142618 | -0,37 | 0,682309944 | -0,02 | 0,975687196 | -0,35 | 0,635285358 |
| Serpina3m    | -0,39 | 0,688503606 | 0,22  | 0,705747563 | 0,06  | 0,923350407 | 0,08  | 0,949531666 | 0,17  | 0,928764431 |
| Serpina3n    | -0,33 | 0,828910401 | -0,32 | 0,868839934 | 0     | 0,998479656 | -0,67 | 0,599442847 | 0,18  | 0,917844354 |
| Serpina4-ps1 | -0,18 | 0,673291416 | -0,16 | 0,82505545  | -0,49 | 0,27278296  | 0,05  | 0,918492221 | -0,16 | 0,789294096 |
| Serpina5     | -0,13 | 0,856984761 | -0,06 | 0,955204677 | -0,05 | 0,959437564 | -0,2  | 0,731281458 | -0,21 | 0,740020498 |
| Serpina6     | -0,15 | 0,888652674 | 0,06  | 0,96126106  | -0,55 | 0,37686469  | -0,43 | 0,696843539 | -0,61 | 0,763240477 |
| Serpina7     | 0,07  | 0,89763852  | 0,04  | 0,936414321 | -0,18 | 0,813110365 | 0,25  | 0,537565928 | 0,52  | 0,347158944 |
| Serpina9     | 0,1   | 0,857394916 | 0,36  | 0,722938629 | 0,37  | 0,453446323 | -0,37 | 0,675375908 | 0,11  | 0,944241841 |
| Serpina10    | -0,23 | 0,665181891 | -0,51 | 0,40873647  | 0,06  | 0,948085051 | 0,32  | 0,509274266 | 0,1   | 0,904636459 |
| Serpina11    | -0,28 | 0,704641551 | -0,02 | 0,977588305 | 0,09  | 0,894018349 | -0,43 | 0,306414254 | -0,55 | 0,432948101 |
| Serpina12    | 0,47  | 0,642618049 | 0,15  | 0,925981858 | -0,23 | 0,846176253 | 0,04  | 0,943864463 | 0     | 0,999572304 |
| Serpina13    | 0,07  | 0,939647483 | 0,41  | 0,653492327 | -0,42 | 0,458742703 | -0,32 | 0,523255995 | -0,24 | 0,733036399 |
| Serpina1a    | 2,32  | 0,137844388 | 2,74  | 0,064031868 | -1,01 | 0,671012215 | 0,82  | 0,230415121 | -0,43 | 0,584456807 |
| Serpina1b    | 2,39  | 0,049816202 | 1,02  | 0,333125716 | 0,17  | 0,863964732 | 0,45  | 0,45580171  | -0,53 | 0,554975763 |
| Serpina1c    | 0,4   | 0,527354429 | -0,33 | 0,828498885 | -0,52 | 0,513059626 | -0,22 | 0,549383468 | -0,45 | 0,603671069 |
| Serpina2     | -0,32 | 0,734284587 | 0,22  | 0,786394409 | 1,56  | 0,11187442  | 0,14  | 0,79462427  | 0,41  | 0,434997258 |
| Serpina3a    | 0,09  | 0,879088386 | -0,18 | 0,754578715 | -0,1  | 0,871283127 | 0,18  | 0,729392851 | 0,16  | 0,827542827 |
| Serpina3b    | -0,01 | 0,987965359 | 0,06  | 0,926655316 | 0,21  | 0,654076196 | -0,17 | 0,648160347 | -0,09 | 0,916410813 |
| Serpina3c    | 0,27  | 0,595245851 | -0,3  | 0,529304793 | -0,13 | 0,825125026 | 0,09  | 0,845767749 | -0,16 | 0,823098095 |
| Serpina3d    | 0,24  | 0,731173847 | -0,02 | 0,9860901   | 0,11  | 0,869952072 | -0,45 | 0,716994919 | -0,37 | 0,80484971  |
| Serpina5     | 0,26  | 0,690495549 | 0,11  | 0,8910846   | 0,8   | 0,305273726 | -0,63 | 0,200764803 | -0,07 | 0,954657649 |
| Serpina6a    | 0,1   | 0,883923631 | -0,27 | 0,553831024 | 0,49  | 0,501664412 | 0,64  | 0,252813429 | -0,2  | 0,861056054 |

|           |       |             |       |             |       |             |       |             |       |             |
|-----------|-------|-------------|-------|-------------|-------|-------------|-------|-------------|-------|-------------|
| Serpinb6b | 1,94  | 0,268112899 | 1,97  | 0,077698935 | -0,99 | 0,244110578 | -2,06 | 0,054260149 | 1,23  | 0,135418412 |
| Serpinb6c | 0,1   | 0,887281047 | -0,78 | 0,423880715 | -0,59 | 0,37686469  | 0,72  | 0,276760356 | 0,21  | 0,836061657 |
| Serpinb6d | 0,15  | 0,874676538 | 0,18  | 0,86245211  | -0,27 | 0,666575428 | 0,47  | 0,378796733 | 0,24  | 0,78532501  |
| Serpinb6e | 0,15  | 0,78476082  | -0,23 | 0,626354464 | -0,31 | 0,697383223 | 0,38  | 0,212468692 | 0,12  | 0,855354002 |
| Serpinb7  | 0,09  | 0,882500171 | -0,05 | 0,911024505 | 0,09  | 0,904057901 | -0,18 | 0,645709367 | -0,13 | 0,890957032 |
| Serpinb8  | 0,27  | 0,717407143 | 1     | 0,200674509 | -0,04 | 0,980963931 | -1,49 | 0,324794827 | 0,96  | 0,708898543 |
| Serpinb9  | 1,28  | 0,132947145 | 1,92  | 0,040620931 | -1,51 | 0,132065448 | 0,44  | 0,604842873 | 1,88  | 0,024319976 |
| Serpinb9b | 0,25  | 0,916217568 | 0,37  | 0,778847836 | -0,02 | 0,992606832 | -0,02 | 0,995180436 | 0,87  | 0,551972106 |
| Serpinb9c | -0,17 | 0,734646609 | 0,03  | 0,980518468 | 0,02  | 0,982305856 | 0,09  | 0,91064124  | 0,35  | 0,583279373 |
| Serpinb9d | 0,21  | 0,663119768 | -0,04 | 0,956049982 | 0,01  | 0,996111139 | -0,02 | 0,967866794 | -0,1  | 0,907249663 |
| Serpinb9e | -0,16 | 0,883656463 | -0,14 | 0,767178812 | -0,49 | 0,287512572 | -0,09 | 0,884326814 | -0,46 | 0,574285481 |
| Serpinb9f | 0,13  | 0,862941936 | -0,17 | 0,903595287 | 0,05  | 0,967418707 | 0,13  | 0,874607411 | 0,46  | 0,574428837 |
| Serpinb9g | 0,09  | 0,94727537  | 0,74  | 0,564634931 | -0,71 | 0,38497941  | -0,24 | 0,824364287 | 0,28  | 0,797167184 |
| Serpinc1  | 0,1   | 0,925170559 | 0,43  | 0,695689103 | -0,68 | 0,348136125 | -0,06 | 0,933072037 | -0,32 | 0,823098095 |
| Serpind1  | 0,92  | 0,486330326 | -0,26 | 0,785573503 | 0,07  | 0,941718633 | 1,07  | 0,19247613  | -0,14 | 0,910829332 |
| Serpine1  | -0,22 | 0,535864683 | -0,78 | 0,265901715 | 0,36  | 0,399470425 | 2,02  | 0,006869809 | -0,32 | 0,573106355 |
| Serpine2  | -0,33 | 0,84900712  | 0,24  | 0,75380926  | 0,48  | 0,860923344 | -3,82 | 0,008249806 | 0,21  | 0,858872204 |
| Serpine3  | -0,63 | 0,220541198 | -0,34 | 0,459231649 | -0,21 | 0,776419989 | -0,3  | 0,625039631 | -0,51 | 0,418238574 |
| Serpinf1  | 0,23  | 0,803761785 | 0,71  | 0,441083677 | 0,94  | 0,462643491 | -2,42 | 0,007466198 | -1,71 | 0,130672134 |
| Serpinf2  | -0,11 | 0,8634587   | -0,17 | 0,834220463 | 0,01  | 0,99452103  | -0,3  | 0,566165959 | 0,02  | 0,983514531 |
| Serping1  | 2,06  | 0,219672614 | 1,88  | 0,077698935 | -2,64 | 0,000100844 | 1,58  | 0,025699992 | 3,22  | 0,000336363 |
| Serpinh1  | -0,26 | 0,593540946 | -0,19 | 0,691433995 | 0,38  | 0,414922527 | 1,33  | 0,036841765 | 0,13  | 0,884248437 |
| Serpinl1  | -0,4  | 0,7580074   | -0,22 | 0,898998198 | 0,16  | 0,878688944 | -2,51 | 0,016441851 | -0,1  | 0,935732697 |
| Serpinl2  | 0,12  | 0,855421712 | -0,03 | 0,98230594  | -0,21 | 0,712697139 | 0,02  | 0,980724248 | 0,04  | 0,965851124 |
| Sertad1   | 0,62  | 0,321600657 | 0,43  | 0,248260122 | -0,28 | 0,742784486 | -0,67 | 0,069176122 | 0,29  | 0,574664967 |
| Sertad2   | 0,01  | 0,99658     | 0,06  | 0,901000778 | 0     | 0,997942192 | 0,22  | 0,758875849 | 0,14  | 0,910083563 |
| Sertad3   | 0,15  | 0,747663533 | -0,13 | 0,80097084  | -0,76 | 0,329525512 | -0,39 | 0,687014375 | -0,52 | 0,551027267 |
| Sertad4   | -0,1  | 0,914801568 | 0,34  | 0,617055108 | 0,48  | 0,59755586  | -1,05 | 0,246085743 | -0,17 | 0,912683275 |
| Sertm1    | 0,15  | 0,775148192 | -0,01 | 0,994321327 | 0,02  | 0,984778342 | 0,1   | 0,828717672 | 0,1   | 0,884640084 |
| Sesn1     | 0,79  | 0,561977827 | -0,29 | 0,584832749 | -0,32 | 0,822936218 | -2,79 | 0,006048812 | -1,68 | 0,015349051 |
| Sesn2     | -0,33 | 0,489042022 | 0,07  | 0,904361564 | 0,05  | 0,955742302 | 0,55  | 0,447967935 | 0,05  | 0,972590168 |
| Sesn3     | -0,19 | 0,771381752 | 0,27  | 0,586374959 | -0,05 | 0,961453721 | 1,3   | 0,023760719 | 1,01  | 0,087632866 |
| Sestd1    | 0     | 0,998769353 | 0,15  | 0,93867339  | 1,07  | 0,146556211 | 1,17  | 0,23330135  | -0,23 | 0,887815327 |
| Set       | -0,28 | 0,624481073 | -0,06 | 0,896065393 | -0,14 | 0,896698162 | 1,08  | 0,078332465 | -0,56 | 0,523459737 |
| Setbp1    | -0,31 | 0,70137787  | -0,12 | 0,933320126 | 0,01  | 0,998479176 | -1,8  | 0,013493602 | -0,14 | 0,902226626 |

|        |       |             |       |             |       |             |       |             |       |             |
|--------|-------|-------------|-------|-------------|-------|-------------|-------|-------------|-------|-------------|
| Setd1a | -0,18 | 0,875711103 | -0,39 | 0,550207979 | 0,09  | 0,957904357 | 0,16  | 0,782230431 | -0,04 | 0,968130547 |
| Setd1b | -0,26 | 0,689114497 | 0     | 1           | -0,05 | 0,949101317 | -0,27 | 0,413161964 | -0,07 | 0,925949592 |
| Setd2  | -0,03 | 0,96177183  | 0,01  | 0,997700959 | -0,13 | 0,81820534  | -0,23 | 0,636518887 | 0,19  | 0,759995389 |
| Setd3  | -0,16 | 0,738714467 | 0,08  | 0,904258936 | 0,47  | 0,450629834 | 0,92  | 0,071185701 | 0,69  | 0,164342007 |
| Setd4  | 0,27  | 0,588383674 | 0,26  | 0,529278426 | -0,33 | 0,61483831  | -0,25 | 0,695191539 | -0,06 | 0,959573673 |
| Setd5  | 0,13  | 0,812186413 | 0,06  | 0,934280572 | 0,08  | 0,90345282  | 0,2   | 0,536893933 | -0,13 | 0,835191    |
| Setd6  | -0,39 | 0,72989626  | -0,26 | 0,919674046 | 0,99  | 0,621385343 | -0,17 | 0,922258485 | -0,52 | 0,726042963 |
| Setd7  | -0,22 | 0,778486036 | -0,01 | 0,988922072 | -0,23 | 0,617943722 | 0,07  | 0,858956727 | -0,07 | 0,932268703 |
| Setd8  | -0,48 | 0,253333488 | -0,24 | 0,694017753 | 0,44  | 0,511236157 | 1,36  | 0,027716298 | 0,15  | 0,849670841 |
| Setdb1 | -1,02 | 0,244269955 | -0,09 | 0,910184435 | 1,21  | 0,062565619 | 0,11  | 0,906675262 | -0,09 | 0,939948423 |
| Setdb2 | 1,08  | 0,185196531 | 1,57  | 0,205273528 | -0,34 | 0,885551089 | -0,54 | 0,226286594 | 2,29  | 0,006290449 |
| Setmar | -0,28 | 0,515770167 | -0,19 | 0,873517281 | -0,22 | 0,805783058 | 0,01  | 0,994818044 | 0,11  | 0,953297732 |
| Setx   | -0,13 | 0,782586323 | 0,19  | 0,818072947 | 0,2   | 0,766733736 | 0,44  | 0,425898515 | 0,49  | 0,429106643 |
| Sez6   | -0,08 | 0,966250856 | -0,57 | 0,623157194 | -0,29 | 0,637321546 | 0,43  | 0,253724262 | -0,05 | 0,956610289 |
| Sez6l  | -0,27 | 0,555287219 | 0,07  | 0,962617743 | -0,23 | 0,766796774 | -0,48 | 0,314061582 | -0,28 | 0,723883531 |
| Sez6l2 | -1,06 | 0,091826925 | -0,68 | 0,415198475 | 1,23  | 0,163911257 | 2,72  | 0,023024676 | 0,19  | 0,884640084 |
| Sf1    | -0,43 | 0,553849378 | -0,16 | 0,747360238 | 0,46  | 0,340914728 | -0,15 | 0,819747319 | -0,23 | 0,765327693 |
| Sf3a1  | -0,56 | 0,201152011 | -0,44 | 0,543407021 | 0,79  | 0,13589176  | 0,42  | 0,371151329 | -0,21 | 0,778568403 |
| Sf3a2  | -0,52 | 0,172698611 | -0,07 | 0,896187678 | -0,17 | 0,845492414 | -0,12 | 0,73719503  | -0,31 | 0,524829864 |
| Sf3a3  | -0,58 | 0,19651262  | -0,07 | 0,938233008 | 0,84  | 0,216279127 | 0,22  | 0,635482645 | -0,4  | 0,524086785 |
| Sf3b1  | -0,02 | 0,97114796  | 0,07  | 0,904671921 | 0,03  | 0,975062424 | -0,1  | 0,82581314  | 0,13  | 0,836061657 |
| Sf3b2  | -0,08 | 0,893137556 | 0,15  | 0,912137323 | 0,28  | 0,64300681  | -0,42 | 0,588433913 | -0,29 | 0,761683333 |
| Sf3b3  | -0,66 | 0,157941498 | -0,3  | 0,54406997  | 0,29  | 0,590832576 | 0,69  | 0,221156241 | -0,08 | 0,939448119 |
| Sf3b5  | -0,22 | 0,597519827 | -0,48 | 0,314703215 | 0,36  | 0,557268968 | 1     | 0,173468279 | 0,11  | 0,9162287   |
| Sf3b6  | 0,4   | 0,530928105 | -0,1  | 0,81976908  | 0,38  | 0,470379063 | 0,28  | 0,81096279  | 0,34  | 0,815426568 |
| Sfmbt1 | 0,78  | 0,25379976  | 0,56  | 0,383826859 | 0,17  | 0,804427007 | 0,11  | 0,913177881 | 0,54  | 0,513517573 |
| Sfmbt2 | -0,24 | 0,660215768 | 0,15  | 0,93163271  | -0,17 | 0,845321518 | -0,16 | 0,891764078 | -0,11 | 0,917030581 |
| Sfn    | 0,21  | 0,580117138 | -0,27 | 0,816543137 | 0,37  | 0,619328985 | -0,34 | 0,680255321 | -0,69 | 0,286520354 |
| Sfpq   | 0,02  | 0,975949545 | -0,05 | 0,940156926 | 0,04  | 0,956650841 | 0,37  | 0,335352248 | 0,04  | 0,969994712 |
| Sfr1   | -0,04 | 0,935927529 | -0,15 | 0,766425161 | 0,14  | 0,867589536 | 0,7   | 0,085299961 | 0,13  | 0,864373858 |
| Sfrp1  | 0,37  | 0,785491059 | 1,7   | 0,154882285 | -0,94 | 0,061544289 | -0,96 | 0,111487533 | 0,31  | 0,701728076 |
| Sfrp2  | -0,04 | 0,971351449 | 0,13  | 0,805949528 | -0,1  | 0,88783743  | -0,11 | 0,865534768 | -0,3  | 0,688552315 |
| Sfrp4  | 0,36  | 0,460103183 | -0,17 | 0,717942902 | 0,08  | 0,921919966 | 0,17  | 0,818908863 | 0,14  | 0,906367939 |
| Sfrp5  | -0,06 | 0,919567534 | 0,01  | 0,987282412 | -0,02 | 0,990836784 | 0,57  | 0,318415862 | 0,17  | 0,889613878 |
| Sfswap | 0,02  | 0,976574175 | 0,19  | 0,801151945 | -0,22 | 0,771873685 | 0,09  | 0,926333875 | -0,01 | 0,990610351 |

|        |       |             |       |             |       |             |       |             |       |             |
|--------|-------|-------------|-------|-------------|-------|-------------|-------|-------------|-------|-------------|
| Sft2d1 | -0,33 | 0,339551273 | -0,21 | 0,59511701  | 0,11  | 0,902637441 | 0,03  | 0,950597099 | -0,3  | 0,626854477 |
| Sft2d2 | -0,53 | 0,234445333 | 0,01  | 0,991061965 | -0,15 | 0,914320423 | 1,33  | 0,141873176 | 0,06  | 0,976818518 |
| Sft2d3 | -0,43 | 0,415009876 | -0,06 | 0,945374636 | 0,18  | 0,837090107 | -0,18 | 0,676010477 | 0,09  | 0,918865935 |
| Sfta2  | -0,24 | 0,840882072 | 0,42  | 0,430448847 | 0,05  | 0,961573489 | -0,12 | 0,742815987 | -0,42 | 0,579118086 |
| Sftpa1 | 0,02  | 0,98701986  | 0,13  | 0,919119519 | 0,01  | 0,99407001  | 0,49  | 0,454456101 | 0,25  | 0,71265105  |
| Sftpb  | 0,11  | 0,826457489 | 0,2   | 0,700951495 | -0,65 | 0,351006256 | -0,18 | 0,752708491 | 0,44  | 0,479727901 |
| Sftpc  | 0,44  | 0,565453765 | 0,06  | 0,975124205 | 0,04  | 0,977827235 | -0,12 | 0,817976855 | -0,05 | 0,960065122 |
| Sftpd  | -0,01 | 0,996998625 | 0,24  | 0,735554037 | 0,21  | 0,824244582 | 0,02  | 0,980890499 | 0,01  | 0,991628025 |
| Sfxn1  | -0,62 | 0,280649352 | -0,37 | 0,56691167  | -0,05 | 0,964851619 | 1,24  | 0,214912434 | 0,19  | 0,879530216 |
| Sfxn2  | -0,28 | 0,773711275 | -0,07 | 0,968437059 | 0,89  | 0,374610064 | -0,25 | 0,504625503 | -0,55 | 0,316401979 |
| Sfxn3  | -0,26 | 0,724829885 | -0,13 | 0,781665479 | 0,22  | 0,786933951 | -0,55 | 0,100262816 | -0,77 | 0,122225826 |
| Sfxn4  | -0,45 | 0,742013855 | 0,02  | 0,992929085 | 0,02  | 0,989336214 | -0,82 | 0,314138392 | -0,34 | 0,728007144 |
| Sfxn5  | -0,39 | 0,721797378 | 0,07  | 0,974580396 | -0,44 | 0,562334029 | -0,44 | 0,539551389 | -0,72 | 0,337492586 |
| Sgca   | 0,5   | 0,394799935 | 0,16  | 0,763005394 | -0,12 | 0,881461218 | -0,4  | 0,204120985 | -0,33 | 0,735052158 |
| Sgcb   | 0,34  | 0,53440815  | 0,55  | 0,560183498 | -0,12 | 0,899913569 | 0,31  | 0,720329719 | 0,64  | 0,466753993 |
| Sgcd   | 0,02  | 0,988818464 | 0,54  | 0,672416139 | -0,36 | 0,760930184 | -0,4  | 0,599633602 | 0,18  | 0,854084773 |
| Sgce   | 0,16  | 0,757032046 | 0,51  | 0,405492027 | 0,4   | 0,548288344 | 0,02  | 0,992323442 | 0,26  | 0,82840392  |
| Sgcg   | 0,41  | 0,316917195 | 0,21  | 0,590722193 | -0,49 | 0,419537272 | 0,18  | 0,658011013 | 0,26  | 0,675389126 |
| Sgcz   | -0,02 | 0,984725403 | 0,26  | 0,568187167 | -0,35 | 0,545465016 | -0,01 | 0,982212444 | -0,21 | 0,765327693 |
| Sgf29  | -0,07 | 0,910736071 | 0,02  | 0,975427696 | 0,13  | 0,892705612 | 0,42  | 0,476284901 | 0,04  | 0,97425848  |
| Sgip1  | 0,06  | 0,965991176 | 0,55  | 0,499787105 | -0,02 | 0,984778342 | -0,59 | 0,488287457 | -0,07 | 0,979456872 |
| Sgk1   | 0,29  | 0,468767852 | 0,24  | 0,742730285 | -0,24 | 0,731606116 | -1,14 | 0,026602139 | -0,1  | 0,885872093 |
| Sgk2   | 0,34  | 0,46691413  | -0,47 | 0,730602188 | -0,06 | 0,941254389 | 0,98  | 0,061811045 | 0,39  | 0,680340254 |
| Sgk3   | -0,7  | 0,220541198 | -0,03 | 0,9860901   | -0,41 | 0,603802059 | -0,73 | 0,17854439  | -0,06 | 0,951125195 |
| Sgms1  | -0,9  | 0,38767919  | -0,4  | 0,703923817 | -0,84 | 0,317122702 | -0,81 | 0,339858865 | -0,36 | 0,710368081 |
| Sgms2  | 0,42  | 0,618093813 | 1,09  | 0,104457339 | 0,44  | 0,777568498 | 0,23  | 0,811006924 | 0,16  | 0,950308536 |
| Sgol1  | -0,01 | 0,996777836 | -2,05 | 0,208373622 | 2,08  | 0,032716563 | 2,56  | 0,050236686 | -0,2  | 0,821140509 |
| Sgol2a | -1,09 | 0,089282283 | -1,16 | 0,250902933 | 1,26  | 0,150840372 | 2,48  | 0,018656064 | -0,01 | 0,990091016 |
| Sgol2b | -0,22 | 0,643945114 | -0,22 | 0,682189381 | -0,19 | 0,777417583 | -0,28 | 0,495866541 | -0,17 | 0,902802615 |
| Sgpl1  | 0,48  | 0,373844376 | 0,19  | 0,856242883 | 0,32  | 0,549618715 | 1,53  | 0,0456902   | 0,42  | 0,436089254 |
| Sgpp1  | -0,9  | 0,194613044 | -0,04 | 0,979551751 | 0,06  | 0,943444027 | -2,47 | 0,003863434 | -0,54 | 0,431894609 |
| Sgpp2  | 0     | 0,998769353 | 0,4   | 0,431022747 | 0,32  | 0,736837174 | -3,1  | 0,021592079 | -0,26 | 0,864801064 |
| Sgsh   | -0,3  | 0,419591944 | -0,21 | 0,593605226 | 0,39  | 0,447140999 | -0,5  | 0,428028856 | -1,44 | 0,092911237 |
| Sgsm1  | -0,55 | 0,355779967 | 0,08  | 0,891627071 | -0,78 | 0,264273523 | 0,27  | 0,673546458 | -0,01 | 0,992438465 |
| Sgsm2  | 0,41  | 0,50183085  | 0,13  | 0,92585897  | -0,29 | 0,744387748 | -0,1  | 0,904971257 | 0,41  | 0,691274518 |

|          |       |             |       |             |       |             |       |             |       |             |
|----------|-------|-------------|-------|-------------|-------|-------------|-------|-------------|-------|-------------|
| Sgsm3    | -0,63 | 0,356031165 | -0,49 | 0,600177044 | 0,27  | 0,814850264 | 0,14  | 0,742291133 | -0,67 | 0,34046371  |
| Sgta     | 0,1   | 0,882027826 | 0,04  | 0,955891382 | 0,05  | 0,960677449 | 0,08  | 0,90409407  | -0,25 | 0,786979275 |
| Sgtb     | 0,65  | 0,501334077 | 0,22  | 0,892194304 | -0,07 | 0,976086122 | -0,47 | 0,335352248 | -0,47 | 0,62176581  |
| Sh2b1    | -0,05 | 0,923707553 | 0,32  | 0,535950767 | -0,18 | 0,813212086 | -0,09 | 0,884009965 | -0,14 | 0,865258929 |
| Sh2b2    | -0,02 | 0,981668952 | -0,3  | 0,709581109 | -0,02 | 0,990836784 | 0,36  | 0,6282575   | 0,26  | 0,794054354 |
| Sh2b3    | -0,63 | 0,311456005 | -0,37 | 0,732847182 | -0,04 | 0,965656549 | -0,55 | 0,522767386 | 0     | 0,99921137  |
| Sh2d1a   | 0,58  | 0,38929961  | 0,03  | 0,978305313 | -0,06 | 0,9346616   | 0,21  | 0,512902457 | 0,11  | 0,880656145 |
| Sh2d1b1  | -0,1  | 0,827055517 | 0,39  | 0,640836969 | -0,02 | 0,991562229 | -0,25 | 0,567919709 | 0,16  | 0,849477094 |
| Sh2d1b2  | 0,17  | 0,896715643 | 0,34  | 0,738394549 | -0,05 | 0,967767582 | 0,25  | 0,731281458 | 0,21  | 0,836061657 |
| Sh2d2a   | -0,09 | 0,916074217 | 0,04  | 0,963369162 | -0,9  | 0,457740325 | -0,16 | 0,755234779 | -0,06 | 0,951620605 |
| Sh2d3c   | -0,1  | 0,871941635 | 0,08  | 0,868010263 | -0,39 | 0,43825018  | 0,09  | 0,85301747  | -0,58 | 0,214056891 |
| Sh2d4a   | -0,46 | 0,620361515 | -0,03 | 0,977204386 | -0,06 | 0,953622038 | -0,3  | 0,626897887 | -0,2  | 0,858867218 |
| Sh2d4b   | 0,04  | 0,950897622 | -0,29 | 0,52963493  | 0     | 0,997220401 | -0,34 | 0,48277775  | -0,23 | 0,780418062 |
| Sh2d5    | 0,28  | 0,589442341 | 0,17  | 0,842793123 | -0,17 | 0,849342965 | 3,99  | 0,003196865 | 0,11  | 0,918529364 |
| Sh2d6    | -0,09 | 0,933815936 | -0,23 | 0,651942972 | 0,46  | 0,602775092 | 0,06  | 0,908141892 | -0,05 | 0,960974478 |
| Sh2d7    | -0,15 | 0,838208309 | 0,35  | 0,501438027 | -0,47 | 0,302861841 | -0,12 | 0,741765786 | 0,26  | 0,657070737 |
| Sh3bgr   | 0,25  | 0,742958309 | 0,18  | 0,874448335 | -0,3  | 0,671215692 | -0,57 | 0,62296101  | -0,01 | 0,992980215 |
| Sh3bgrl  | -0,07 | 0,927899995 | -0,06 | 0,981586987 | 0,25  | 0,791940256 | 1,24  | 0,118734164 | 0,3   | 0,75089362  |
| Sh3bgrl2 | -0,18 | 0,707197684 | 0,04  | 0,954866231 | 0,48  | 0,263956349 | 1,66  | 0,032693391 | -0,25 | 0,862023394 |
| Sh3bgrl3 | -0,12 | 0,795936199 | -0,25 | 0,56003929  | 0,18  | 0,71593256  | 0,69  | 0,097710906 | -0,16 | 0,801438603 |
| Sh3bp1   | -0,11 | 0,886889675 | -0,06 | 0,944460866 | 1,13  | 0,190867064 | -0,79 | 0,547286019 | -0,27 | 0,880202418 |
| Sh3bp2   | -0,23 | 0,614250688 | -0,02 | 0,987867499 | 0,06  | 0,961337501 | 1,82  | 0,011153686 | -0,04 | 0,979456872 |
| Sh3bp4   | -0,21 | 0,673291416 | -0,12 | 0,862046814 | 0,28  | 0,61190379  | 1,22  | 0,021644799 | 0,2   | 0,792404969 |
| Sh3bp5   | 0,14  | 0,786402905 | 1,05  | 0,091286822 | -1,23 | 0,046579559 | -1,58 | 0,025313682 | 0,43  | 0,504660722 |
| Sh3bp5l  | -0,46 | 0,305893528 | -0,12 | 0,899496232 | -0,35 | 0,59976087  | 0,37  | 0,533941098 | -0,4  | 0,42760723  |
| Sh3d19   | 0,21  | 0,650372884 | 0,11  | 0,810470037 | -0,01 | 0,994306831 | -0,2  | 0,855784146 | -0,21 | 0,884247878 |
| Sh3d21   | -0,17 | 0,826574109 | -0,46 | 0,29487254  | -0,23 | 0,820245247 | -1,54 | 0,00932284  | -0,7  | 0,116694427 |
| Sh3gl1   | -0,71 | 0,102058516 | -0,46 | 0,236928695 | 0,46  | 0,49443985  | 0,7   | 0,242691189 | -0,3  | 0,728455827 |
| Sh3gl2   | 0,28  | 0,692490424 | -0,24 | 0,791713044 | -0,06 | 0,945482    | 0,09  | 0,894580364 | -0,24 | 0,730951829 |
| Sh3gl3   | -0,27 | 0,766705553 | 0,23  | 0,891532732 | -0,42 | 0,712697139 | -0,84 | 0,157755101 | -0,46 | 0,779912857 |
| Sh3glb1  | 0,2   | 0,602160482 | 0,03  | 0,956555856 | -0,04 | 0,970969012 | -0,13 | 0,768647851 | 0,25  | 0,668607331 |
| Sh3glb2  | -0,15 | 0,761364679 | -0,16 | 0,727848017 | 0,01  | 0,992606832 | 0,69  | 0,070595145 | -0,26 | 0,645088339 |
| Sh3kbp1  | -0,01 | 0,996219097 | -0,37 | 0,558993973 | 0,29  | 0,720094207 | 2,21  | 0,05556291  | -0,08 | 0,957830821 |
| Sh3pxd2a | -1    | 0,060747612 | -0,19 | 0,683509429 | 0,67  | 0,404120029 | 0,33  | 0,304619829 | -1,53 | 0,01494486  |
| Sh3pxd2b | -0,52 | 0,291156435 | -0,09 | 0,943915456 | 0,85  | 0,135721222 | 2,65  | 0,01418726  | -0,38 | 0,675282484 |

|         |       |             |       |             |       |             |       |             |       |             |
|---------|-------|-------------|-------|-------------|-------|-------------|-------|-------------|-------|-------------|
| Sh3rf1  | -0,42 | 0,495249753 | -0,18 | 0,824224277 | 0,54  | 0,290123118 | -0,51 | 0,285133875 | -0,14 | 0,845218636 |
| Sh3rf2  | 0,29  | 0,687848309 | -0,41 | 0,46415666  | -0,17 | 0,799586974 | 0,31  | 0,688152796 | 0,17  | 0,87343011  |
| Sh3rf3  | 0,05  | 0,956980086 | -0,38 | 0,439921536 | 0,29  | 0,643853175 | 0,27  | 0,795786041 | 0,08  | 0,955654991 |
| Sh3tc1  | -0,74 | 0,139999287 | -1    | 0,16121328  | 0,41  | 0,560376292 | -0,39 | 0,468566806 | -0,59 | 0,223294439 |
| Sh3tc2  | -0,43 | 0,470180669 | -0,28 | 0,668839557 | -0,08 | 0,933816161 | -1,19 | 0,155687636 | -0,49 | 0,592460098 |
| Sh3yl1  | -0,09 | 0,951363782 | 0,4   | 0,751390543 | 0,15  | 0,898305096 | -0,38 | 0,655240397 | 0,19  | 0,818974537 |
| Shank1  | 0,25  | 0,740529913 | 0,14  | 0,843313499 | 0,04  | 0,973732268 | -1,16 | 0,19247613  | 0,06  | 0,976743304 |
| Shank2  | -0,1  | 0,844441552 | 0,08  | 0,926157704 | -0,1  | 0,878636183 | -0,3  | 0,416798746 | -0,34 | 0,702993783 |
| Shank3  | -0,53 | 0,27550648  | -0,47 | 0,271377031 | -0,08 | 0,941056703 | -0,44 | 0,228568393 | -0,21 | 0,726042963 |
| Sharpin | -0,09 | 0,846425481 | 0,12  | 0,849511429 | -0,33 | 0,661401774 | 0,27  | 0,400497416 | -0,05 | 0,957046874 |
| Shb     | -0,34 | 0,518267881 | -0,23 | 0,599280812 | -0,33 | 0,66424919  | -0,16 | 0,700246485 | 0,58  | 0,220768726 |
| Shbg    | 0     | 0,999620531 | 0,27  | 0,679757061 | 0,17  | 0,838289412 | 0,34  | 0,46564804  | 0,02  | 0,981913783 |
| Shc1    | -0,58 | 0,261643948 | -0,5  | 0,590119384 | -0,1  | 0,898005346 | 0,5   | 0,260735009 | -0,42 | 0,45731544  |
| Shc2    | -0,28 | 0,579630863 | 0,4   | 0,354604974 | 0,18  | 0,775290551 | -0,1  | 0,870983745 | 0,09  | 0,924447831 |
| Shc3    | -0,05 | 0,926692467 | 0,03  | 0,974580396 | -0,01 | 0,997220401 | -0,48 | 0,260606276 | 0,43  | 0,734672945 |
| Shc4    | -0,14 | 0,922118639 | 1,22  | 0,109267475 | -1,08 | 0,034949988 | 0,88  | 0,059860685 | -0,18 | 0,851744744 |
| Shcbp1  | -1,23 | 0,112137562 | -1,63 | 0,324289795 | 0,94  | 0,234445998 | 2,29  | 0,080185028 | -0,37 | 0,665054064 |
| Shcbp11 | 0,25  | 0,563096179 | -0,07 | 0,917695989 | 0,07  | 0,949101317 | 0,01  | 0,993869623 | -0,13 | 0,875282246 |
| Shd     | 0,16  | 0,785669218 | -0,08 | 0,923044405 | -0,06 | 0,950862176 | 0,21  | 0,691718699 | -0,09 | 0,9162287   |
| She     | -0,77 | 0,286679777 | 0,25  | 0,728083849 | 0,73  | 0,457740325 | -0,79 | 0,377338868 | 0     | 0,997856047 |
| Shf     | -0,3  | 0,791503902 | 0,35  | 0,468585948 | -0,05 | 0,973732268 | -0,87 | 0,055692769 | 0,89  | 0,195288262 |
| Shfm1   | 0,09  | 0,933689638 | -0,1  | 0,853162838 | 0,34  | 0,428556311 | 0,75  | 0,053263871 | -0,03 | 0,977599806 |
| Shh     | -0,11 | 0,80226019  | -0,18 | 0,739080134 | -0,23 | 0,688126003 | -0,17 | 0,817367025 | 0,09  | 0,933088525 |
| Shisa2  | 0,06  | 0,923180948 | -0,12 | 0,869673273 | -0,09 | 0,90665     | 0,1   | 0,845813504 | 0,04  | 0,974110019 |
| Shisa3  | -0,25 | 0,54401985  | -0,17 | 0,819901964 | -0,26 | 0,719386001 | 0,2   | 0,688152796 | 0,11  | 0,918288793 |
| Shisa4  | -0,53 | 0,417261157 | -0,02 | 0,984142489 | 0,8   | 0,264885341 | 0,82  | 0,053923118 | -0,29 | 0,668358769 |
| Shisa5  | 0,43  | 0,3813597   | 0,45  | 0,389996405 | -0,47 | 0,602775092 | -0,78 | 0,476414891 | -0,3  | 0,844265172 |
| Shisa6  | 0,14  | 0,799359492 | 0,01  | 0,998695926 | 0     | 0,997942192 | 0,01  | 0,991962381 | -0,12 | 0,905587977 |
| Shisa7  | 0,25  | 0,64625581  | -0,19 | 0,687092175 | -0,01 | 0,990836784 | 0     | 0,999221046 | -0,2  | 0,833369653 |
| Shisa8  | 0,28  | 0,619127292 | 0,05  | 0,956555856 | 0,15  | 0,825914825 | 0,07  | 0,933070045 | -0,11 | 0,915659009 |
| Shisa9  | -0,25 | 0,816465857 | -0,05 | 0,966078321 | 0,12  | 0,899614877 | -0,52 | 0,688800416 | -0,55 | 0,758052028 |
| Shkbp1  | -0,57 | 0,314547808 | -0,58 | 0,62432723  | 0,22  | 0,748069534 | 0,56  | 0,279779407 | -0,42 | 0,434163214 |
| Shmt1   | -0,33 | 0,428049245 | -0,13 | 0,871370631 | 0,71  | 0,300988698 | 1,09  | 0,059827687 | -0,1  | 0,949102947 |
| Shmt2   | -0,16 | 0,829889828 | -0,35 | 0,716437544 | 0,08  | 0,946541303 | 1,27  | 0,087326688 | 0,63  | 0,241113242 |
| Shoc2   | 0,18  | 0,662416763 | -0,01 | 0,984000632 | -0,05 | 0,963221639 | 0,07  | 0,867765681 | 0,01  | 0,991437885 |

|          |       |             |       |             |       |             |       |             |       |             |
|----------|-------|-------------|-------|-------------|-------|-------------|-------|-------------|-------|-------------|
| Shox2    | -0,27 | 0,560461791 | -0,11 | 0,884239192 | 0,2   | 0,804607903 | -0,2  | 0,846112956 | -0,14 | 0,903863447 |
| Shpk     | 0,18  | 0,882119027 | 0,18  | 0,859954464 | -0,22 | 0,680430197 | 0,17  | 0,747854799 | -0,07 | 0,962820357 |
| Shprh    | -0,57 | 0,26178903  | -0,09 | 0,937136673 | -0,45 | 0,587531732 | -0,57 | 0,34530061  | -0,26 | 0,813513601 |
| Shq1     | -1,24 | 0,074890017 | -0,56 | 0,716769193 | 1,06  | 0,224957494 | 0,55  | 0,564602387 | 0,51  | 0,609383216 |
| Shroom1  | -0,15 | 0,813220024 | -0,4  | 0,80097084  | 0,33  | 0,490489841 | -0,23 | 0,76291338  | -0,42 | 0,681102799 |
| Shroom2  | -0,19 | 0,714662474 | -0,29 | 0,564387918 | 0,14  | 0,930193129 | 1,34  | 0,028782784 | -0,29 | 0,658578692 |
| Shroom3  | -0,38 | 0,815219917 | -0,03 | 0,985172298 | 0,49  | 0,383742911 | 0,9   | 0,393201346 | 0,06  | 0,977967676 |
| Shroom4  | 0,39  | 0,457967905 | 0,21  | 0,66864205  | 0,01  | 0,997268369 | 0,42  | 0,575297022 | 0     | 0,99888749  |
| Shtn1    | -0,39 | 0,382845839 | 0,47  | 0,676430742 | 0,32  | 0,684455958 | -0,4  | 0,606227664 | 0     | 0,998704075 |
| Siae     | -0,24 | 0,856118781 | -0,87 | 0,642151308 | 0,81  | 0,620837479 | -0,57 | 0,10232323  | -0,56 | 0,35507605  |
| Siah1a   | -0,16 | 0,7914678   | -0,06 | 0,916496897 | 0,24  | 0,703647945 | 0,08  | 0,900662145 | 0,67  | 0,236669428 |
| Siah1b   | -0,45 | 0,756443747 | -0,42 | 0,570091566 | 0,36  | 0,791504463 | -0,22 | 0,756538445 | -0,46 | 0,699048279 |
| Siah2    | 0,08  | 0,895278749 | 0,18  | 0,703558337 | -0,09 | 0,897963852 | 0,33  | 0,418568872 | 0,17  | 0,774926249 |
| Siah3    | 0,01  | 0,996219097 | -0,25 | 0,543285958 | -0,04 | 0,96858449  | 0,08  | 0,94180692  | -0,03 | 0,985269236 |
| Sidt1    | 0,16  | 0,912166656 | 0,02  | 0,97407904  | 0,1   | 0,911634383 | 0,1   | 0,894580364 | -0,32 | 0,733488478 |
| Sidt2    | -0,21 | 0,682398233 | -0,06 | 0,940046211 | 0,05  | 0,962459789 | 0,35  | 0,337784536 | -0,71 | 0,258280591 |
| Sigirr   | 0,3   | 0,597519827 | 0,04  | 0,956049982 | 0,06  | 0,967767582 | 0,11  | 0,771294754 | -0,81 | 0,193796626 |
| Siglec1  | -0,06 | 0,922118639 | -0,29 | 0,49941722  | -0,05 | 0,963357998 | 0,5   | 0,370795704 | 0,35  | 0,706623272 |
| Siglec15 | -0,24 | 0,574796258 | -0,12 | 0,849346754 | -0,54 | 0,264273523 | 0,43  | 0,262571926 | 0,23  | 0,76457584  |
| Siglece  | 0,59  | 0,636980714 | 0,5   | 0,506966484 | 0,42  | 0,786838878 | 0,19  | 0,808805848 | 0,8   | 0,394654462 |
| Siglecf  | 0,01  | 0,983516046 | 0,14  | 0,88928164  | -0,02 | 0,987889263 | 0,21  | 0,665208114 | 0,12  | 0,851180406 |
| Siglecg  | 0,07  | 0,948926586 | -0,39 | 0,721972544 | -0,64 | 0,469053827 | -0,14 | 0,876060698 | -0,16 | 0,864373858 |
| Siglech  | 0,33  | 0,537473384 | 0,38  | 0,604914697 | 0,22  | 0,807521381 | -0,12 | 0,730531335 | 0,04  | 0,962631948 |
| Sigmar1  | -0,53 | 0,179751021 | -0,75 | 0,337595448 | 0,11  | 0,923248239 | 0,4   | 0,334043883 | -0,31 | 0,583279373 |
| Sik1     | -0,31 | 0,424550317 | -0,04 | 0,964894023 | 0,08  | 0,923258105 | 0,94  | 0,064116388 | -0,86 | 0,153803813 |
| Sik2     | -0,2  | 0,84900712  | -0,38 | 0,69017177  | 0,35  | 0,828207503 | -0,06 | 0,935478757 | -0,03 | 0,980945466 |
| Sik3     | 0,02  | 0,978853388 | 0,16  | 0,716661568 | -0,26 | 0,730738549 | -0,25 | 0,677272877 | -0,46 | 0,480315514 |
| Sike1    | 0,24  | 0,679451519 | -0,05 | 0,958621018 | -0,35 | 0,695705149 | 0,24  | 0,437515574 | 0,2   | 0,781405349 |
| Sil1     | 0     | 0,998210173 | 0,01  | 0,991043706 | 0,85  | 0,306181478 | 0,9   | 0,498525843 | 0,47  | 0,750359224 |
| Sim1     | 0,03  | 0,977439383 | 0,34  | 0,500929303 | -0,29 | 0,647014995 | -0,36 | 0,662587743 | -0,04 | 0,977236465 |
| Sim2     | -0,12 | 0,892124736 | 0,38  | 0,418712141 | -0,14 | 0,839026875 | -0,82 | 0,385475222 | -0,52 | 0,740299822 |
| Simc1    | 0,17  | 0,846447446 | 0,5   | 0,241189065 | 0,54  | 0,492125162 | -0,48 | 0,384726084 | 0,37  | 0,602231893 |
| Sin3a    | 0,28  | 0,682533437 | 0,04  | 0,948496432 | 0,4   | 0,481027334 | -0,22 | 0,573729427 | -0,06 | 0,944318268 |
| Sin3b    | 0,26  | 0,600952042 | 0,49  | 0,501438027 | -0,32 | 0,500849254 | 0,02  | 0,984966598 | 0,34  | 0,57707001  |
| Sipa1    | -0,21 | 0,609062532 | -0,18 | 0,781665479 | 0,24  | 0,686061973 | 0,15  | 0,688429263 | -0,7  | 0,140961739 |



|         |       |             |       |             |       |             |       |             |       |             |
|---------|-------|-------------|-------|-------------|-------|-------------|-------|-------------|-------|-------------|
| Sipa111 | 0,2   | 0,597519827 | 0,09  | 0,897811179 | -0,05 | 0,954229024 | -0,23 | 0,657996279 | 0,46  | 0,45660227  |
| Sipa112 | -0,23 | 0,682102965 | -0,48 | 0,325242663 | -0,06 | 0,951720733 | 0,27  | 0,564245683 | 0,01  | 0,990633766 |
| Sipa113 | -0,64 | 0,326453691 | -0,24 | 0,729957667 | -0,18 | 0,828453884 | 0,07  | 0,901792848 | -0,63 | 0,222441818 |
| Sirpa   | -0,71 | 0,312439966 | -0,59 | 0,501438027 | 0,46  | 0,461388668 | -1,63 | 0,015669762 | -0,3  | 0,602192799 |
| Sirpb1a | 0,23  | 0,761364679 | -0,15 | 0,922588722 | 0,26  | 0,865318296 | 0,29  | 0,594365292 | 0,4   | 0,639071244 |
| Sirpb1b | 0,55  | 0,207100355 | 0,04  | 0,994137877 | 0,37  | 0,891365932 | 0,31  | 0,747946366 | 0,18  | 0,81954505  |
| Sirt1   | 0,63  | 0,153824107 | 0,57  | 0,214378713 | -0,18 | 0,885680687 | -1,5  | 0,018003209 | 0,27  | 0,640223591 |
| Sirt2   | 0,19  | 0,66961506  | 0,21  | 0,641052915 | -0,23 | 0,711678713 | -0,15 | 0,815995962 | 0,22  | 0,759610634 |
| Sirt3   | 0,36  | 0,581922845 | 0,17  | 0,859775606 | 0     | 0,997637749 | -0,22 | 0,667923239 | -0,2  | 0,830813323 |
| Sirt4   | -0,11 | 0,939989529 | -0,22 | 0,839789639 | 0,32  | 0,642400849 | -0,54 | 0,296799743 | -0,4  | 0,489352424 |
| Sirt5   | 0     | 0,997842309 | 0,2   | 0,722938629 | -0,17 | 0,901032944 | 0,26  | 0,689941532 | 0,22  | 0,816435488 |
| Sirt6   | 0,13  | 0,869162288 | 0,4   | 0,673817783 | -0,01 | 0,997220401 | 0,25  | 0,530723335 | 0,07  | 0,922577223 |
| Sirt7   | -0,05 | 0,94815841  | -0,15 | 0,763005394 | -0,27 | 0,795128728 | 0,02  | 0,986460172 | -0,31 | 0,80618429  |
| Sis     | -0,19 | 0,752654071 | -0,15 | 0,900801202 | 0,26  | 0,651559391 | 0,04  | 0,955211988 | -0,43 | 0,411297305 |
| Sit1    | -0,19 | 0,856118781 | 0,21  | 0,698886888 | -0,56 | 0,362608952 | -0,16 | 0,823795118 | -0,02 | 0,986971861 |
| Siva1   | -0,62 | 0,172698611 | -0,99 | 0,156759607 | 1,18  | 0,108671431 | 0,77  | 0,313810031 | -0,19 | 0,876634949 |
| Six1    | 0,39  | 0,448008565 | 0,13  | 0,829196858 | 0,31  | 0,628978443 | 0,18  | 0,828955037 | -0,02 | 0,987603478 |
| Six2    | 0,29  | 0,54401985  | -0,12 | 0,854940418 | -0,32 | 0,743001036 | -0,15 | 0,878366514 | 0,38  | 0,725669526 |
| Six3    | 0,21  | 0,816710776 | 0,03  | 0,972842477 | 0,26  | 0,770526999 | -0,26 | 0,716055856 | -0,61 | 0,354557431 |
| Six3os1 | 0,14  | 0,742504815 | -0,35 | 0,707748286 | 0,04  | 0,963199274 | -0,1  | 0,832369672 | -0,1  | 0,896763724 |
| Six4    | -0,25 | 0,816710776 | -0,32 | 0,725935658 | 0,59  | 0,37686469  | 0,76  | 0,324103294 | 0,37  | 0,72221917  |
| Six5    | -0,19 | 0,839375532 | 0,02  | 0,980518468 | -0,29 | 0,683917899 | -0,07 | 0,916455982 | -0,32 | 0,664809536 |
| Six6    | 0,09  | 0,85617916  | 0,06  | 0,966078321 | -0,03 | 0,970913247 | -0,28 | 0,597534893 | 0,14  | 0,861636137 |
| Ska1    | -1,14 | 0,189684245 | -1,1  | 0,295775341 | 1,57  | 0,03169775  | 2,26  | 0,009344805 | -0,04 | 0,966951657 |
| Ska2    | -0,38 | 0,79795086  | -1,03 | 0,790939978 | -0,01 | 0,997268369 | 0,58  | 0,725849753 | 1,1   | 0,261508216 |
| Ska3    | -1,1  | 0,153824107 | -2,09 | 0,040620931 | 0,36  | 0,757498725 | 2,26  | 0,003907268 | -0,71 | 0,498803884 |
| Skap1   | 0,01  | 0,993728727 | -0,03 | 0,98859071  | -0,19 | 0,705811313 | -0,42 | 0,340180842 | -0,04 | 0,957620856 |
| Skap2   | -0,42 | 0,328445973 | 0,22  | 0,717074519 | 0,15  | 0,867654013 | 0,15  | 0,805169421 | 0,32  | 0,653769438 |
| Ski     | -0,1  | 0,891309235 | -0,17 | 0,69843     | -0,06 | 0,948712735 | 0,02  | 0,98922569  | 0,21  | 0,830077903 |
| Skida1  | 0,57  | 0,179751021 | 0,26  | 0,614530823 | -0,31 | 0,599364835 | 0,25  | 0,678009232 | -0,06 | 0,950308536 |
| Skil    | 0,26  | 0,576009654 | 0,08  | 0,932818378 | 0,45  | 0,398631702 | 0,34  | 0,682774206 | -0,26 | 0,830788023 |
| Skint1  | 0,11  | 0,888623724 | -0,26 | 0,708726036 | 0,11  | 0,876684089 | 0,23  | 0,778212842 | 0,15  | 0,861056054 |
| Skint10 | -0,32 | 0,627190894 | -0,08 | 0,930419616 | -0,18 | 0,878636183 | -0,33 | 0,665334658 | 0,11  | 0,944318268 |
| Skint11 | 0,17  | 0,697992827 | 0,15  | 0,868839934 | 0     | 0,999329448 | -0,41 | 0,478731976 | -0,36 | 0,562348217 |
| Skint2  | 0,24  | 0,767083571 | 0,33  | 0,813423328 | -0,23 | 0,79007666  | -0,17 | 0,832265679 | 0,38  | 0,479585604 |

|          |       |             |       |             |       |             |       |             |       |             |
|----------|-------|-------------|-------|-------------|-------|-------------|-------|-------------|-------|-------------|
| Skint3   | -0,08 | 0,892823025 | 0,18  | 0,84786877  | -0,04 | 0,963357998 | 0,24  | 0,665890635 | -0,04 | 0,970154126 |
| Skint4   | 0,13  | 0,820785667 | 0,12  | 0,934294134 | 0,03  | 0,973732268 | 0,23  | 0,702311689 | 0,37  | 0,541137006 |
| Skint5   | 0,22  | 0,783591449 | 0,13  | 0,907167997 | 0,01  | 0,99407001  | 0,01  | 0,988575767 | -0,04 | 0,97206128  |
| Skint6   | 0     | 0,999549745 | 0,05  | 0,963791015 | -0,16 | 0,782805427 | 0,08  | 0,866757253 | 0,05  | 0,96176496  |
| Skint7   | -0,62 | 0,546019769 | 0,41  | 0,386629492 | -0,31 | 0,725191296 | -0,2  | 0,774462531 | 0,01  | 0,994686236 |
| Skint8   | 0,02  | 0,984972115 | 0,23  | 0,779562915 | -0,24 | 0,826840894 | -0,45 | 0,707902199 | 0,06  | 0,980904768 |
| Skint9   | -0,22 | 0,708296676 | -0,34 | 0,646693191 | -0,17 | 0,804576742 | -0,1  | 0,936482652 | -0,34 | 0,750167943 |
| Skiv2l   | 0,09  | 0,943325449 | 0     | 1           | -0,12 | 0,908364112 | -0,14 | 0,676659386 | -0,11 | 0,86809582  |
| Skiv2l2  | -0,17 | 0,785400637 | 0,13  | 0,818112774 | 0,49  | 0,628659493 | 0,08  | 0,857993844 | 0,54  | 0,241922199 |
| Skor1    | 0,47  | 0,575829311 | 0,04  | 0,983852643 | -0,36 | 0,684455958 | 0,44  | 0,598756532 | 0,46  | 0,583434544 |
| Skor2    | -0,31 | 0,54401985  | -0,14 | 0,861862086 | 0,03  | 0,9701931   | 0,06  | 0,947940753 | 0,13  | 0,909024113 |
| Skp1a    | 0,29  | 0,535827944 | 0,35  | 0,423711331 | -0,2  | 0,79284622  | 0,43  | 0,213931075 | 0,18  | 0,752420653 |
| Skp2     | -0,8  | 0,239601221 | -0,51 | 0,242981491 | 0,6   | 0,59595639  | 1,31  | 0,041009258 | -0,55 | 0,46391899  |
| Sla      | 0,94  | 0,595245851 | 0,17  | 0,839277519 | -0,39 | 0,815567598 | -1,41 | 0,128990816 | -0,42 | 0,803738269 |
| Sla2     | -0,16 | 0,824728873 | 0,21  | 0,686922122 | -0,34 | 0,628048897 | -0,16 | 0,713536041 | -0,3  | 0,648312151 |
| Slain1   | 0,17  | 0,716234912 | 0,68  | 0,586955568 | -0,06 | 0,951209773 | -0,28 | 0,58892402  | -0,07 | 0,939448119 |
| Slain1os | 0,37  | 0,529626842 | 0,57  | 0,409234346 | -0,57 | 0,333179926 | -0,15 | 0,671991774 | 0,2   | 0,720844381 |
| Slain2   | -0,22 | 0,662282378 | -0,02 | 0,970762922 | -0,01 | 0,994306831 | 0,41  | 0,445793157 | 0,18  | 0,827032122 |
| Slamf1   | 0,06  | 0,962660554 | 0,67  | 0,703923817 | -0,39 | 0,661445401 | -0,6  | 0,802239788 | -0,04 | 0,991115166 |
| Slamf6   | 0,32  | 0,640236418 | 0,17  | 0,882847123 | 0,05  | 0,940543595 | 0,2   | 0,619678786 | -0,2  | 0,730330131 |
| Slamf7   | -0,07 | 0,892848629 | 0,43  | 0,845663274 | -0,06 | 0,947460329 | 0,16  | 0,788818065 | 0,05  | 0,984125319 |
| Slamf8   | 2,77  | 0,048513596 | 3,54  | 0,013071651 | -2,27 | 0,015142723 | 1,55  | 0,014155978 | 2,64  | 0,002900902 |
| Slamf9   | -0,11 | 0,911158473 | 0,03  | 0,996203965 | -0,18 | 0,791252802 | 0,4   | 0,564355795 | -0,53 | 0,321751898 |
| Slbp     | -0,19 | 0,736503749 | -0,22 | 0,718438693 | 0,28  | 0,551307878 | -0,11 | 0,87630843  | 0,06  | 0,953297732 |
| Slc10a1  | 0,26  | 0,498087659 | -0,33 | 0,807471759 | -0,35 | 0,446493846 | -0,01 | 0,984966598 | -0,17 | 0,887702206 |
| Slc10a2  | 0,17  | 0,655006949 | 0,2   | 0,671319666 | -0,1  | 0,908229112 | -0,2  | 0,53585175  | -0,09 | 0,93462388  |
| Slc10a3  | -0,14 | 0,814444163 | -0,05 | 0,955424071 | 0,66  | 0,546286708 | 0,28  | 0,663875303 | 0,06  | 0,955776547 |
| Slc10a4  | -0,12 | 0,907419323 | 0,15  | 0,789051952 | -0,14 | 0,850258511 | -0,29 | 0,383914763 | -0,05 | 0,952753183 |
| Slc10a5  | -0,13 | 0,832696131 | 0,25  | 0,732834316 | -0,39 | 0,308773662 | -0,09 | 0,929835301 | -0,03 | 0,985714059 |
| Slc10a6  | -0,11 | 0,935927529 | -0,6  | 0,747707816 | -0,11 | 0,930489319 | -2,96 | 0,003009221 | -1,13 | 0,052757203 |
| Slc10a7  | 0,26  | 0,542068385 | -0,27 | 0,651611182 | -0,2  | 0,76370647  | 1,11  | 0,140830388 | 0,43  | 0,583279373 |
| Slc11a1  | -0,17 | 0,820785667 | 0,15  | 0,873628464 | 0,24  | 0,917508513 | 0,45  | 0,28569581  | -0,04 | 0,976802617 |
| Slc11a2  | -0,36 | 0,69207205  | 0,15  | 0,896003756 | 0,18  | 0,875089034 | 0,85  | 0,256765861 | -0,39 | 0,66411916  |
| Slc12a1  | 0,25  | 0,687662951 | -0,59 | 0,453958512 | -0,16 | 0,871982841 | -1,85 | 0,228739853 | -0,84 | 0,587915673 |
| Slc12a2  | -0,97 | 0,112973661 | -1,12 | 0,220176471 | 1,09  | 0,066172795 | 1,39  | 0,039416641 | -0,8  | 0,337492586 |

|           |       |             |       |             |       |             |       |             |       |             |
|-----------|-------|-------------|-------|-------------|-------|-------------|-------|-------------|-------|-------------|
| Slc12a3   | 0,37  | 0,68558206  | 0,93  | 0,302028989 | -0,35 | 0,57242912  | -1,24 | 0,071772884 | -0,3  | 0,697818445 |
| Slc12a4   | 0,08  | 0,899660614 | 0,01  | 0,999395995 | -0,04 | 0,95648763  | -0,18 | 0,751051801 | 0,06  | 0,950056013 |
| Slc12a5   | 0,02  | 0,989336878 | 0,21  | 0,847885195 | -0,17 | 0,841669036 | -1,25 | 0,117192962 | -0,04 | 0,97425848  |
| Slc12a6   | -0,31 | 0,757032046 | -0,03 | 0,96095671  | 0,21  | 0,855523214 | -1,52 | 0,031382387 | -1,28 | 0,140880841 |
| Slc12a7   | -0,11 | 0,878562194 | 0,51  | 0,610881589 | -0,29 | 0,798348773 | -0,18 | 0,780374458 | 0,17  | 0,793839436 |
| Slc12a8   | -0,04 | 0,968500829 | 0,75  | 0,188301476 | -0,71 | 0,245113926 | -0,74 | 0,070479165 | 0,31  | 0,525188239 |
| Slc12a9   | -0,09 | 0,892823025 | 0,52  | 0,435489861 | 0,01  | 0,992358638 | 0,45  | 0,499384622 | -0,26 | 0,765809384 |
| Slc13a1   | 0,28  | 0,546019769 | 0,3   | 0,813423328 | 0,14  | 0,830507475 | -1,13 | 0,2423686   | 1,4   | 0,208771188 |
| Slc13a2   | 0,48  | 0,27175357  | -0,06 | 0,952352299 | 0,06  | 0,939590181 | -0,17 | 0,747440364 | -0,18 | 0,765327693 |
| Slc13a2os | -0,21 | 0,703822377 | -0,08 | 0,943915456 | -0,03 | 0,979423868 | 0,07  | 0,926006808 | -0,24 | 0,673120647 |
| Slc13a3   | -0,1  | 0,932654105 | -0,05 | 0,976594855 | -0,11 | 0,926263109 | -1,09 | 0,122795965 | -0,16 | 0,920355527 |
| Slc13a4   | 0,24  | 0,689253784 | 0,11  | 0,892194304 | -0,01 | 0,99158537  | 0,23  | 0,56693064  | 0,07  | 0,93957001  |
| Slc13a5   | 0,12  | 0,882943798 | 0,83  | 0,344340083 | -0,15 | 0,861877024 | -0,62 | 0,342955376 | -0,09 | 0,949248129 |
| Slc14a1   | -1,43 | 0,059511737 | -0,33 | 0,786394409 | -0,18 | 0,824743005 | -4,95 | 0,006048812 | -0,23 | 0,833004931 |
| Slc14a2   | 0,24  | 0,753450161 | 0,04  | 0,958856577 | -0,2  | 0,702677589 | -0,09 | 0,896776507 | -0,25 | 0,742982183 |
| Slc15a1   | 0,21  | 0,751568489 | 0,27  | 0,783325809 | -0,23 | 0,752954039 | 0,24  | 0,728067633 | -0,1  | 0,918865935 |
| Slc15a2   | 2,56  | 0,016359317 | -1,6  | 0,619501651 | -0,48 | 0,863701276 | -0,68 | 0,556996699 | -1,15 | 0,601481833 |
| Slc15a3   | 0,84  | 0,415009876 | 1,17  | 0,084290601 | -0,48 | 0,660394995 | 0,17  | 0,898960356 | 2,36  | 0,02019977  |
| Slc15a4   | -0,01 | 0,995150704 | -0,13 | 0,859954464 | 0,45  | 0,343594254 | 0,42  | 0,236263762 | 0,19  | 0,824727805 |
| Slc15a5   | 0,38  | 0,509815996 | 0,07  | 0,904698551 | 0,04  | 0,974887915 | 0,15  | 0,639359737 | -0,15 | 0,826250589 |
| Slc16a1   | 0,21  | 0,844682018 | 0,17  | 0,933075539 | -0,54 | 0,42201495  | 1,14  | 0,418317818 | 0,84  | 0,588641763 |
| Slc16a10  | 0,21  | 0,730258012 | -0,12 | 0,905051067 | -0,1  | 0,894239558 | 0,11  | 0,866712375 | 0,37  | 0,643580968 |
| Slc16a11  | -0,04 | 0,960720096 | 0,23  | 0,709432782 | -0,66 | 0,210914225 | 0,03  | 0,968643827 | -0,02 | 0,984675109 |
| Slc16a12  | -0,6  | 0,582798732 | 0,18  | 0,857408462 | 0,3   | 0,704122998 | -1,29 | 0,212124969 | -0,19 | 0,939127163 |
| Slc16a13  | 0,7   | 0,208489561 | 0,89  | 0,257624607 | 0,11  | 0,879483405 | 0,06  | 0,947936692 | 0,28  | 0,823098095 |
| Slc16a14  | -0,05 | 0,950669622 | -0,65 | 0,245917773 | -0,13 | 0,843664699 | 0,21  | 0,778212842 | 0,13  | 0,923040447 |
| Slc16a2   | -0,99 | 0,208776356 | -1,28 | 0,20159159  | 0,8   | 0,434733492 | -1,27 | 0,094541798 | -0,68 | 0,428613647 |
| Slc16a3   | 0,54  | 0,241546548 | 0,39  | 0,585330659 | 0,32  | 0,654076196 | 1,35  | 0,055569548 | -0,54 | 0,361452103 |
| Slc16a4   | -1,01 | 0,372648236 | -0,3  | 0,852461907 | 0,4   | 0,73484021  | -1,41 | 0,134067362 | -0,61 | 0,579739537 |
| Slc16a5   | -0,21 | 0,632336587 | 0     | 0,999210601 | 0,02  | 0,990962882 | -0,3  | 0,618254643 | -0,35 | 0,712793529 |
| Slc16a6   | -0,4  | 0,464460918 | -0,4  | 0,510894317 | 0,35  | 0,642542263 | 2,96  | 0,006689209 | -0,33 | 0,737843954 |
| Slc16a7   | 0,02  | 0,98701986  | 0,23  | 0,654719935 | 0,13  | 0,882540073 | -1,53 | 0,389492505 | -1,11 | 0,492214222 |
| Slc16a8   | -0,05 | 0,958188047 | 0,18  | 0,728669599 | -0,24 | 0,628978443 | 0,05  | 0,935303329 | -0,25 | 0,714403019 |
| Slc16a9   | 0,08  | 0,911800803 | -0,84 | 0,302028989 | -0,15 | 0,885291698 | 0,3   | 0,381388569 | -0,46 | 0,559558581 |
| Slc17a1   | -0,16 | 0,820023436 | 0,48  | 0,644516897 | 0,13  | 0,837999835 | -0,93 | 0,174790911 | -0,03 | 0,990448047 |

|              |       |             |       |             |       |             |       |             |       |             |
|--------------|-------|-------------|-------|-------------|-------|-------------|-------|-------------|-------|-------------|
| Slc17a2      | -0,12 | 0,848783415 | -0,08 | 0,920933203 | -0,1  | 0,882022653 | -0,13 | 0,87613802  | -0,28 | 0,745134899 |
| Slc17a3      | 0,15  | 0,838208309 | -0,35 | 0,580482339 | -0,1  | 0,896387294 | -0,61 | 0,441582774 | -0,11 | 0,958856121 |
| Slc17a4      | 0,01  | 0,987781493 | 0,09  | 0,964757836 | -0,11 | 0,855523214 | -0,08 | 0,957596559 | -0,13 | 0,877020459 |
| Slc17a5      | 0,06  | 0,948291116 | -0,3  | 0,730602188 | 1,06  | 0,041170446 | 0     | 1           | -0,79 | 0,443817964 |
| Slc17a6      | 0,26  | 0,632053719 | -0,09 | 0,961370411 | -0,02 | 0,983471086 | -0,24 | 0,825247725 | 0,26  | 0,861977667 |
| Slc17a7      | 0,07  | 0,948043329 | -0,24 | 0,832655657 | 0,22  | 0,688298291 | 0,07  | 0,940948462 | -0,08 | 0,940438527 |
| Slc17a8      | -0,31 | 0,593540946 | -0,48 | 0,582478031 | -0,37 | 0,421026326 | 0,34  | 0,655788245 | 0,18  | 0,866693394 |
| Slc17a9      | 0,28  | 0,722348441 | 0,13  | 0,882847123 | 0,39  | 0,613496662 | 0,29  | 0,729392851 | -0,4  | 0,737575231 |
| Slc18a1      | -0,21 | 0,712165686 | 0,06  | 0,917256002 | 0,44  | 0,465949919 | -0,33 | 0,40199632  | 0,23  | 0,831419954 |
| Slc18a2      | 0,18  | 0,689966234 | 0,13  | 0,924011565 | -0,18 | 0,865318296 | -2,26 | 0,039871137 | -1,85 | 0,044250711 |
| Slc18a3      | -0,11 | 0,7914678   | 0,01  | 0,983071427 | -0,02 | 0,973732268 | -0,06 | 0,903284702 | 0,07  | 0,934185668 |
| Slc18b1      | -0,32 | 0,808947569 | -1,19 | 0,615311543 | 0,95  | 0,161469949 | -0,93 | 0,177192888 | -0,84 | 0,269243865 |
| Slc19a1      | -0,21 | 0,844285362 | -0,74 | 0,494161701 | 0,21  | 0,806044178 | 1,11  | 0,031574061 | 0,15  | 0,86809582  |
| Slc19a2      | -0,11 | 0,824036388 | 0,04  | 0,97875059  | 0,26  | 0,842919139 | 0,81  | 0,167652526 | 0,56  | 0,302524811 |
| Slc19a3      | -0,08 | 0,929525085 | -0,25 | 0,772415321 | 0,19  | 0,926974012 | -0,76 | 0,360971057 | 0,57  | 0,612061926 |
| Slc1a1       | 0,11  | 0,964154899 | 0,47  | 0,729236145 | -1,43 | 0,101024489 | 1,27  | 0,423188824 | 0,84  | 0,619080487 |
| Slc1a2       | 0,14  | 0,859337079 | -0,03 | 0,958545812 | -0,41 | 0,361580981 | 0,03  | 0,963752888 | 0,03  | 0,977599806 |
| Slc1a3       | -0,38 | 0,527507358 | 0,03  | 0,983496065 | -0,61 | 0,180209764 | 0,43  | 0,318799672 | -0,07 | 0,948835084 |
| Slc1a4       | 0,45  | 0,649628704 | 0,22  | 0,818072947 | 1,41  | 0,115813572 | 0,55  | 0,485223835 | 0,97  | 0,249774523 |
| Slc1a5       | -0,64 | 0,242651292 | -0,48 | 0,424068004 | 0,38  | 0,519796196 | 1,44  | 0,026631463 | 0,88  | 0,219210988 |
| Slc1a6       | 0,19  | 0,819634768 | 0,02  | 0,989111193 | -0,79 | 0,343594254 | -0,03 | 0,97556772  | -0,06 | 0,947300798 |
| Slc1a7       | 0,13  | 0,871941635 | 0,01  | 0,993789602 | 0,16  | 0,874098993 | 0,23  | 0,810508503 | -0,03 | 0,984125319 |
| Slc20a1      | -0,72 | 0,173359555 | 0,43  | 0,437560255 | -0,25 | 0,821007131 | 1,45  | 0,055116183 | 0,51  | 0,468757397 |
| Slc20a2      | -1,25 | 0,182425433 | -0,72 | 0,646613262 | 0,9   | 0,270116127 | 0,62  | 0,452114946 | -0,45 | 0,559794251 |
| Slc22a1      | 0,08  | 0,914090929 | -0,38 | 0,538157613 | 0,02  | 0,984879454 | -0,22 | 0,665234661 | 0,46  | 0,535557609 |
| Slc22a12     | 0,2   | 0,717407143 | -0,17 | 0,785244931 | 0,01  | 0,993280531 | 0,06  | 0,920158794 | 0,14  | 0,9039404   |
| Slc22a13     | 0,1   | 0,866788377 | 0,14  | 0,934627513 | -0,25 | 0,73893881  | -0,05 | 0,943864463 | -0,03 | 0,983514531 |
| Slc22a13b-ps | 0,88  | 0,520609641 | 0,45  | 0,581228206 | -0,34 | 0,615458955 | 0,14  | 0,802586804 | -0,28 | 0,788112596 |
| Slc22a14     | 0,59  | 0,136095053 | 0,11  | 0,872388615 | -0,07 | 0,948552385 | -0,42 | 0,225406554 | -0,43 | 0,365076851 |
| Slc22a15     | 0     | 0,998210173 | 0,19  | 0,916176914 | 0,62  | 0,619328985 | -0,41 | 0,67111855  | 0,19  | 0,835191    |
| Slc22a16     | 0,19  | 0,841023515 | 0     | 0,999395995 | -0,05 | 0,953917674 | -0,28 | 0,555880182 | 0,25  | 0,728483022 |
| Slc22a17     | -0,25 | 0,783200207 | -0,16 | 0,881478992 | 0,2   | 0,807926482 | -0,64 | 0,26635871  | -0,66 | 0,239389157 |
| Slc22a18     | -0,14 | 0,896207658 | 0,07  | 0,926353869 | -0,09 | 0,939533598 | -0,77 | 0,132889006 | 0,32  | 0,628274636 |
| Slc22a19     | -0,01 | 0,983516046 | 0,17  | 0,896187678 | -0,21 | 0,684455958 | -0,17 | 0,829478092 | 0,12  | 0,922151079 |
| Slc22a2      | -0,16 | 0,899079341 | -0,6  | 0,49125334  | -0,17 | 0,793893538 | -0,05 | 0,979212436 | 0,47  | 0,697757911 |

|          |       |             |       |             |       |             |       |             |       |             |
|----------|-------|-------------|-------|-------------|-------|-------------|-------|-------------|-------|-------------|
| Slc22a20 | -0,08 | 0,89546421  | -0,03 | 0,9860901   | -0,11 | 0,895520077 | 0,16  | 0,854342596 | 0,01  | 0,985515704 |
| Slc22a21 | -0,44 | 0,358933591 | 0,04  | 0,954948291 | 0,21  | 0,760721308 | -0,7  | 0,457009347 | 0,08  | 0,970895331 |
| Slc22a22 | 0,07  | 0,933689638 | -0,37 | 0,764977206 | -0,11 | 0,9113279   | 0,45  | 0,351750564 | 0,33  | 0,633381473 |
| Slc22a23 | -0,94 | 0,362012674 | -1,25 | 0,115555997 | 0,47  | 0,783052291 | 2,18  | 0,014389323 | 0,69  | 0,416134174 |
| Slc22a26 | 0,27  | 0,484387088 | 0,22  | 0,803710289 | -0,04 | 0,954550124 | -0,53 | 0,298756888 | -0,34 | 0,574428837 |
| Slc22a27 | -0,12 | 0,834744248 | 0,07  | 0,966717367 | -0,05 | 0,950846671 | 0,14  | 0,827219751 | 0,06  | 0,955137605 |
| Slc22a28 | 0,71  | 0,357054834 | 0     | 1           | -0,31 | 0,718020505 | -0,26 | 0,561612258 | -0,37 | 0,590339443 |
| Slc22a29 | 0,08  | 0,895870455 | 0,24  | 0,726214653 | 0,02  | 0,981393315 | -0,12 | 0,743070986 | -0,11 | 0,885872093 |
| Slc22a3  | 0,57  | 0,290377514 | 0,24  | 0,858935338 | -0,11 | 0,87241209  | -0,13 | 0,870146827 | 0,11  | 0,95421799  |
| Slc22a4  | -0,07 | 0,944969851 | -0,74 | 0,459417799 | -0,48 | 0,454498768 | -0,74 | 0,31300153  | -0,36 | 0,794909466 |
| Slc22a5  | 0,07  | 0,959985598 | -0,06 | 0,895950162 | -0,29 | 0,785239584 | -0,13 | 0,901851677 | 0,28  | 0,80222716  |
| Slc22a6  | -0,1  | 0,925019201 | 0,02  | 0,974890527 | -0,45 | 0,324321658 | -0,13 | 0,843978303 | 0,21  | 0,865258929 |
| Slc22a7  | -0,04 | 0,954746388 | 0,01  | 0,991061965 | -0,15 | 0,83346229  | -0,4  | 0,3887862   | -0,29 | 0,694326198 |
| Slc22a8  | 0,3   | 0,460726931 | 0,03  | 0,980518468 | -0,15 | 0,841563482 | -0,36 | 0,470134485 | 0,92  | 0,460094193 |
| Slc23a1  | -0,05 | 0,944311955 | -0,28 | 0,769674091 | -0,19 | 0,824306509 | -0,41 | 0,423768569 | 0,01  | 0,993413582 |
| Slc23a2  | -0,48 | 0,522076759 | -0,16 | 0,709502365 | 0,41  | 0,598179126 | 0,24  | 0,734381142 | 0,46  | 0,540089233 |
| Slc23a3  | 0,68  | 0,419523369 | 0,12  | 0,818072947 | -0,15 | 0,887458532 | -0,35 | 0,646776742 | -0,27 | 0,861038502 |
| Slc24a1  | -0,64 | 0,262231699 | -0,25 | 0,854578468 | -0,21 | 0,795128728 | 0,13  | 0,72670212  | 0,23  | 0,739851808 |
| Slc24a2  | 0,1   | 0,892823025 | 0,6   | 0,370379226 | 0,6   | 0,501664412 | -0,45 | 0,466586615 | 0,06  | 0,961281513 |
| Slc24a3  | -0,28 | 0,721797378 | -0,07 | 0,956935029 | -0,14 | 0,859819846 | -1,69 | 0,027634837 | -0,81 | 0,199537078 |
| Slc24a4  | 0,19  | 0,801386084 | 0,14  | 0,894022563 | 0,27  | 0,867654013 | 0,28  | 0,606082176 | 0,38  | 0,719122515 |
| Slc24a5  | -0,01 | 0,979827119 | -0,34 | 0,667749553 | -0,87 | 0,337509636 | 0,26  | 0,595655599 | 0,57  | 0,574285481 |
| Slc25a1  | -0,31 | 0,5146153   | -0,16 | 0,710407859 | 0,21  | 0,817106175 | 0,5   | 0,495340036 | 0,39  | 0,642685227 |
| Slc25a10 | -1,09 | 0,049493804 | -0,59 | 0,637224838 | 1,1   | 0,264885341 | 0,31  | 0,692706301 | -0,52 | 0,625751363 |
| Slc25a11 | -0,42 | 0,467442016 | 0,14  | 0,76490048  | 0,58  | 0,543291636 | 0,01  | 0,987538905 | -0,4  | 0,452376077 |
| Slc25a12 | -0,69 | 0,159002721 | -0,63 | 0,16121328  | 1,07  | 0,130478958 | 0,43  | 0,441112475 | -0,49 | 0,469148703 |
| Slc25a13 | -0,32 | 0,63699384  | 0     | 1           | -0,06 | 0,965364164 | 1,59  | 0,202274095 | -0,16 | 0,934242963 |
| Slc25a14 | -0,29 | 0,721378796 | 0,08  | 0,952352299 | 0,22  | 0,868938606 | 0,16  | 0,85301747  | -0,02 | 0,985515704 |
| Slc25a15 | -0,73 | 0,344302765 | 0,03  | 0,981630855 | 0,17  | 0,848330689 | -0,12 | 0,88769723  | -0,43 | 0,626176831 |
| Slc25a16 | -1,16 | 0,048513596 | -0,11 | 0,932628106 | 0,35  | 0,849342965 | -0,49 | 0,495034888 | -0,25 | 0,790215612 |
| Slc25a17 | -0,24 | 0,663760226 | 0,01  | 0,988548122 | 1,2   | 0,458562596 | -0,18 | 0,710836445 | -0,41 | 0,551972106 |
| Slc25a18 | 0,31  | 0,689923234 | -0,03 | 0,986782918 | -0,17 | 0,816379653 | -0,73 | 0,162704473 | 0,18  | 0,895918215 |
| Slc25a19 | -0,31 | 0,699727228 | 0,15  | 0,848775903 | 0,18  | 0,870377336 | -0,65 | 0,091341982 | -0,41 | 0,50754323  |
| Slc25a2  | 0,03  | 0,990298541 | -0,13 | 0,905166292 | -0,17 | 0,843785017 | 0     | 1           | 0,59  | 0,669149621 |
| Slc25a20 | -0,4  | 0,22803991  | -0,28 | 0,6547161   | 0,21  | 0,919754592 | 0,73  | 0,324591518 | -0,35 | 0,714477719 |

|          |       |             |       |             |       |             |       |             |       |             |
|----------|-------|-------------|-------|-------------|-------|-------------|-------|-------------|-------|-------------|
| Slc25a21 | 0,09  | 0,93370499  | 0,18  | 0,790939978 | 0     | 0,997394645 | 0,14  | 0,727197341 | 0,36  | 0,498553997 |
| Slc25a22 | 0,3   | 0,721378796 | 0,07  | 0,917256002 | -0,36 | 0,593455611 | 0,48  | 0,509274266 | 0,89  | 0,224327461 |
| Slc25a23 | 0,78  | 0,270547821 | 0,08  | 0,891410756 | -0,08 | 0,94665439  | -2,47 | 0,040803179 | -0,3  | 0,860469017 |
| Slc25a24 | -0,58 | 0,414026998 | 0,27  | 0,826870861 | 0,22  | 0,87078545  | -0,93 | 0,028782784 | -0,19 | 0,832781095 |
| Slc25a25 | -0,41 | 0,431314006 | -0,12 | 0,919762719 | 0,24  | 0,723987482 | 0,48  | 0,469292442 | 0,38  | 0,540089233 |
| Slc25a26 | -0,12 | 0,922118639 | -0,42 | 0,632756037 | 0,71  | 0,30134516  | 0,17  | 0,831151724 | 0,08  | 0,946133906 |
| Slc25a27 | -0,08 | 0,948926586 | 0,28  | 0,718810401 | 0,36  | 0,541363142 | -1,4  | 0,110757273 | -1,03 | 0,078901002 |
| Slc25a28 | -0,2  | 0,727042761 | 0,48  | 0,261025347 | -0,01 | 0,988734862 | -0,53 | 0,192863761 | 0,61  | 0,300600982 |
| Slc25a29 | 0,32  | 0,664456582 | 0,95  | 0,226567124 | 0,03  | 0,980423952 | -0,38 | 0,357998614 | 0,39  | 0,602231893 |
| Slc25a3  | -0,03 | 0,963329626 | -0,05 | 0,945981094 | -0,18 | 0,806062428 | 0,67  | 0,122166866 | 0,15  | 0,829307939 |
| Slc25a30 | -0,4  | 0,703606438 | 0,1   | 0,912516873 | 0,42  | 0,545567013 | -1,04 | 0,093603361 | -0,53 | 0,525018839 |
| Slc25a31 | -0,11 | 0,848783415 | -0,21 | 0,781665479 | 0,07  | 0,93414154  | -0,03 | 0,962371269 | -0,07 | 0,939930189 |
| Slc25a32 | -0,37 | 0,575887113 | -0,11 | 0,842663656 | -0,19 | 0,849342965 | -0,91 | 0,046711803 | -0,48 | 0,410369443 |
| Slc25a33 | -0,08 | 0,922118639 | -0,11 | 0,954324398 | 0,2   | 0,850868333 | -0,1  | 0,893841279 | -0,32 | 0,86570087  |
| Slc25a34 | 0,51  | 0,328303644 | 0,09  | 0,871370631 | 0,07  | 0,946627221 | -0,28 | 0,428459992 | -0,31 | 0,618113191 |
| Slc25a35 | 0,42  | 0,421378808 | -0,37 | 0,813448544 | 0,26  | 0,867654013 | -0,98 | 0,251630483 | -0,68 | 0,334365666 |
| Slc25a36 | 0,3   | 0,596273756 | -0,07 | 0,940269529 | 0     | 0,999931921 | -0,35 | 0,668088137 | 0,24  | 0,826389381 |
| Slc25a37 | 0,25  | 0,6753408   | 0,47  | 0,391122953 | -0,37 | 0,631855861 | -0,63 | 0,118283887 | 0,39  | 0,574285481 |
| Slc25a38 | 0,1   | 0,884190046 | 0,02  | 0,987282412 | 0,16  | 0,895912379 | -0,63 | 0,509774032 | 0,07  | 0,966408575 |
| Slc25a39 | -0,36 | 0,50685922  | -0,31 | 0,535948571 | 0,39  | 0,573350883 | 1,14  | 0,058013596 | -0,49 | 0,581626555 |
| Slc25a4  | -0,25 | 0,532197383 | -0,2  | 0,674709201 | 0,19  | 0,836633803 | 0,61  | 0,234123485 | -0,22 | 0,735622087 |
| Slc25a40 | -0,52 | 0,470166881 | 0,31  | 0,88928164  | 0,12  | 0,946893165 | 0     | 0,996451727 | 0,15  | 0,935732697 |
| Slc25a41 | 0,23  | 0,690823898 | 0,55  | 0,302028989 | -0,07 | 0,941561196 | -0,03 | 0,965983604 | 0,07  | 0,949567213 |
| Slc25a42 | 0,19  | 0,775236271 | -0,01 | 0,995205602 | -0,04 | 0,963221639 | -0,45 | 0,406444051 | -0,12 | 0,928692598 |
| Slc25a43 | -0,67 | 0,351518071 | -0,08 | 0,958187617 | 0,21  | 0,823823322 | 1,45  | 0,194435494 | 0,08  | 0,962718263 |
| Slc25a44 | -0,38 | 0,557114011 | -0,51 | 0,483436169 | 0,47  | 0,510220505 | 0,54  | 0,664175099 | 0,11  | 0,953297732 |
| Slc25a45 | 0,06  | 0,93315732  | 0,05  | 0,974580396 | 0,06  | 0,973732268 | 0,11  | 0,80795564  | -0,31 | 0,696450271 |
| Slc25a46 | 0,24  | 0,67969129  | -0,5  | 0,531993971 | -0,18 | 0,787905724 | -0,42 | 0,38309387  | 0,13  | 0,89630096  |
| Slc25a47 | -0,16 | 0,875761483 | -0,17 | 0,882847123 | 0,4   | 0,540782039 | 0,39  | 0,584151489 | 0,17  | 0,902638028 |
| Slc25a48 | -0,13 | 0,841140165 | -0,06 | 0,949260696 | 0,12  | 0,913132002 | 0,11  | 0,886806548 | 0,12  | 0,871038748 |
| Slc25a5  | -0,33 | 0,414026998 | -0,17 | 0,785128233 | 0,44  | 0,500849254 | 0,61  | 0,215551139 | -0,09 | 0,918529364 |
| Slc25a51 | -0,16 | 0,826083295 | -0,51 | 0,277253387 | 0,52  | 0,446241031 | -0,1  | 0,92328164  | -0,54 | 0,549951038 |
| Slc25a53 | 0,06  | 0,935658945 | 0,4   | 0,654621987 | -0,23 | 0,70130819  | -0,14 | 0,885417869 | 0,11  | 0,919867638 |
| Slc25a54 | -0,09 | 0,852358078 | -0,12 | 0,838450577 | -0,08 | 0,913471825 | 0     | 0,99893305  | -0,01 | 0,992370267 |
| Slc26a1  | -0,07 | 0,921306075 | -0,2  | 0,882931058 | 0,23  | 0,754138555 | -0,04 | 0,966197507 | -0,08 | 0,960974478 |

|             |       |             |       |             |       |             |       |             |       |             |
|-------------|-------|-------------|-------|-------------|-------|-------------|-------|-------------|-------|-------------|
| Slc26a10    | -0,08 | 0,861250259 | 0,02  | 0,985151214 | -0,13 | 0,909233941 | -3,2  | 0,003907268 | -0,97 | 0,047973651 |
| Slc26a11    | -0,52 | 0,364497258 | 0,33  | 0,629486849 | 0,02  | 0,987003605 | 0,05  | 0,938950727 | -0,26 | 0,811827657 |
| Slc26a2     | -0,09 | 0,892124736 | -0,04 | 0,943915456 | 0,1   | 0,890473147 | -0,22 | 0,709570719 | -0,15 | 0,872443959 |
| Slc26a3     | 0,1   | 0,919110324 | 0,5   | 0,558970632 | -0,19 | 0,820892001 | -0,37 | 0,506357609 | 0,27  | 0,697226565 |
| Slc26a4     | 0,08  | 0,875555348 | 0     | 1           | -0,14 | 0,804784019 | -0,21 | 0,690646796 | 0,1   | 0,898309858 |
| Slc26a5     | 0,27  | 0,48308516  | 0,3   | 0,654719935 | -0,14 | 0,818494503 | 0,04  | 0,961963439 | 0,03  | 0,979643119 |
| Slc26a6     | -0,29 | 0,762798673 | 0,31  | 0,794404033 | 0,1   | 0,95907725  | 0,03  | 0,98283761  | 0,16  | 0,906338603 |
| Slc26a7     | -0,13 | 0,915184823 | 0,41  | 0,67361039  | 0,55  | 0,375083855 | -0,79 | 0,206268381 | -0,11 | 0,922012322 |
| Slc26a8     | 0,14  | 0,874838456 | -0,39 | 0,716684136 | -0,33 | 0,590672582 | -0,06 | 0,937694339 | -0,14 | 0,905581898 |
| Slc26a9     | -0,28 | 0,704720946 | -0,44 | 0,587634717 | 0,17  | 0,830507475 | 0,51  | 0,288101709 | -0,57 | 0,320605788 |
| Slc27a1     | -0,64 | 0,189644465 | -0,18 | 0,798461323 | 0,85  | 0,13530359  | -0,2  | 0,7975866   | -0,49 | 0,509461732 |
| Slc27a2     | 0,08  | 0,898269435 | 0,01  | 0,994735911 | 0,07  | 0,947881687 | -1    | 0,200210053 | 0,9   | 0,608072805 |
| Slc27a3     | -0,13 | 0,867243066 | -0,33 | 0,855632384 | 0,55  | 0,47647024  | -2,45 | 0,038569152 | -0,85 | 0,174362184 |
| Slc27a4     | -0,78 | 0,36631183  | -0,19 | 0,713393983 | 0,75  | 0,598179126 | 0,21  | 0,775767277 | -0,79 | 0,339766572 |
| Slc27a5     | 0,05  | 0,963708419 | 0,42  | 0,781665479 | -0,18 | 0,861567666 | -0,04 | 0,961256604 | 0,06  | 0,958845702 |
| Slc27a6     | -0,04 | 0,970463755 | -0,15 | 0,89034555  | 0,06  | 0,959912236 | 0,07  | 0,890274164 | -0,16 | 0,840952901 |
| Slc28a1     | -0,35 | 0,473697811 | -0,06 | 0,912137323 | 0,16  | 0,868798569 | 0,44  | 0,224726991 | 0,2   | 0,799638391 |
| Slc28a3     | -0,11 | 0,898116888 | 0,4   | 0,31069547  | 0,19  | 0,815951038 | 0,05  | 0,930307863 | -0,08 | 0,935812103 |
| Slc29a1     | -1,15 | 0,076108673 | -1,4  | 0,127301007 | 0,76  | 0,217595592 | -0,12 | 0,818711104 | -1,53 | 0,006269121 |
| Slc29a2     | 0,18  | 0,766451086 | -0,69 | 0,362527655 | 0,11  | 0,906747817 | 0,12  | 0,799851164 | -0,19 | 0,768768194 |
| Slc29a3     | -0,22 | 0,687848309 | -0,4  | 0,504755115 | 1,26  | 0,076696168 | -0,22 | 0,529366123 | -0,49 | 0,426902843 |
| Slc29a4     | 0,37  | 0,36240006  | -0,5  | 0,517288934 | 0,14  | 0,876246573 | -0,24 | 0,68890425  | -0,15 | 0,85508146  |
| Slc2a1      | 0,3   | 0,454356317 | 0,37  | 0,490062205 | 0,27  | 0,661747229 | 1,41  | 0,035822622 | 0,48  | 0,570107994 |
| Slc2a10     | -0,6  | 0,269151748 | -0,3  | 0,561562373 | -0,07 | 0,958851839 | 0,66  | 0,241182361 | 0,11  | 0,905581898 |
| Slc2a12     | -0,01 | 0,993175772 | 0,03  | 0,975765252 | 0,3   | 0,686061973 | -0,55 | 0,398276111 | 0,04  | 0,984125319 |
| Slc2a13     | -0,15 | 0,874467978 | 0,16  | 0,894676428 | 1,04  | 0,138770182 | 2,27  | 0,016842964 | 0,01  | 0,991315044 |
| Slc2a2      | -0,19 | 0,738448626 | 0,15  | 0,874448335 | -0,1  | 0,894749665 | -0,23 | 0,63292493  | 0,01  | 0,992499729 |
| Slc2a3      | 0,13  | 0,942119638 | 0,36  | 0,900801202 | -0,12 | 0,935887545 | -1,04 | 0,236263762 | 0,13  | 0,933721104 |
| Slc2a4      | -0,56 | 0,24782842  | -0,31 | 0,80766136  | 0,56  | 0,37970041  | 0,47  | 0,348927241 | -0,08 | 0,954565959 |
| Slc2a4rg-ps | 0,02  | 0,983184832 | 0,14  | 0,833331306 | 0,06  | 0,961464515 | -0,74 | 0,216231559 | -0,24 | 0,773401088 |
| Slc2a5      | 0,17  | 0,820950193 | -0,25 | 0,740618526 | 0,15  | 0,841623714 | 0,55  | 0,181153291 | 0,32  | 0,508153495 |
| Slc2a6      | 0,08  | 0,944291635 | 0,75  | 0,220316311 | -0,48 | 0,706638581 | -0,82 | 0,140090969 | 1,63  | 0,01012797  |
| Slc2a7      | 0,01  | 0,983807636 | 0,48  | 0,384132053 | -0,36 | 0,460875038 | -0,34 | 0,372861132 | 0,04  | 0,961353039 |
| Slc2a8      | -0,1  | 0,869565514 | 0     | 0,999546856 | -0,1  | 0,915321116 | -0,45 | 0,424914438 | -0,72 | 0,193796626 |
| Slc2a9      | -0,08 | 0,944291635 | -0,2  | 0,839789639 | -0,18 | 0,888956864 | 0,03  | 0,983518049 | -0,1  | 0,950005143 |

|          |       |             |       |             |       |             |       |             |       |             |
|----------|-------|-------------|-------|-------------|-------|-------------|-------|-------------|-------|-------------|
| Slc30a1  | 0,05  | 0,915995296 | 0,27  | 0,621518408 | 0,22  | 0,68845998  | -0,05 | 0,910298592 | 0,07  | 0,916937012 |
| Slc30a10 | -0,23 | 0,72649108  | -0,11 | 0,867265251 | -0,26 | 0,783239377 | 0,33  | 0,297824819 | 0,32  | 0,625751363 |
| Slc30a2  | 0,12  | 0,888652674 | 0,08  | 0,919762719 | -0,41 | 0,517241346 | -0,06 | 0,943864463 | 0,12  | 0,918865935 |
| Slc30a3  | 0,19  | 0,664036618 | -0,02 | 0,982701095 | 0,05  | 0,941718633 | -0,51 | 0,206310992 | -0,21 | 0,750504485 |
| Slc30a4  | 0,47  | 0,316085859 | 0,67  | 0,30380134  | 0,15  | 0,924054565 | 1,01  | 0,074366038 | 0,74  | 0,191603436 |
| Slc30a5  | -0,56 | 0,317205194 | -0,08 | 0,868234125 | 1,25  | 0,11618444  | -0,07 | 0,922740736 | -0,03 | 0,979456872 |
| Slc30a6  | -0,21 | 0,821012931 | -0,08 | 0,932292974 | 0,51  | 0,724497914 | -0,02 | 0,979212436 | -0,34 | 0,74624632  |
| Slc30a7  | 0,45  | 0,358933591 | 0,02  | 0,985764487 | -0,2  | 0,752157341 | 0,68  | 0,302626236 | 0,31  | 0,762421617 |
| Slc30a8  | 0,2   | 0,779344514 | 0,43  | 0,56317535  | -0,19 | 0,796904065 | 0,2   | 0,694025296 | 0,32  | 0,54877753  |
| Slc30a9  | -0,32 | 0,539226089 | 0,39  | 0,585443341 | 0,43  | 0,559786242 | 0,26  | 0,517354168 | 0,4   | 0,488888835 |
| Slc31a1  | 0,25  | 0,600423919 | 0,11  | 0,847885195 | -0,11 | 0,921956183 | 1,76  | 0,026972102 | 0,61  | 0,340329443 |
| Slc31a2  | 0,46  | 0,460726931 | -0,08 | 0,926929928 | -0,84 | 0,437307812 | 0,44  | 0,487659549 | 0,74  | 0,286520354 |
| Slc32a1  | -0,08 | 0,874688734 | -0,09 | 0,82263744  | -0,33 | 0,501867979 | 0,12  | 0,861828281 | 0,05  | 0,953971867 |
| Slc33a1  | 0,08  | 0,919567534 | -0,24 | 0,500935318 | 0,67  | 0,247700466 | 0,07  | 0,920640884 | -0,04 | 0,975441362 |
| Slc34a1  | 0,19  | 0,884171483 | -0,26 | 0,631534856 | -0,14 | 0,873457545 | -1,51 | 0,01920968  | 0,49  | 0,750504485 |
| Slc34a2  | -0,05 | 0,970078059 | -0,27 | 0,776548278 | 0,18  | 0,729446768 | 0,27  | 0,596712266 | -0,42 | 0,529395677 |
| Slc34a3  | -0,04 | 0,943079514 | 0,26  | 0,671536239 | -0,09 | 0,928135241 | -0,28 | 0,561656192 | -0,08 | 0,939948423 |
| Slc35a1  | 0,12  | 0,909290237 | -0,15 | 0,882847123 | 0,23  | 0,797422121 | 0,14  | 0,896599656 | 0,84  | 0,378967925 |
| Slc35a2  | -0,43 | 0,362306469 | -0,21 | 0,814467082 | 0,38  | 0,545465016 | 0,52  | 0,418568872 | -0,16 | 0,901139449 |
| Slc35a3  | 0     | 0,999288019 | -0,07 | 0,937377463 | 0,55  | 0,500343254 | 1,02  | 0,206540971 | 0,75  | 0,339052455 |
| Slc35a4  | -0,43 | 0,474484584 | -0,44 | 0,31069547  | 0,33  | 0,546286708 | 0,48  | 0,169406164 | -0,37 | 0,443943915 |
| Slc35a5  | -0,08 | 0,948926586 | 0,13  | 0,782652703 | 0,45  | 0,725191296 | -0,15 | 0,921141531 | -0,17 | 0,92741476  |
| Slc35b1  | 0,11  | 0,808947569 | 0,02  | 0,981758111 | 0,22  | 0,695705149 | 0,17  | 0,637588177 | 0     | 0,997254437 |
| Slc35b2  | 0,64  | 0,316685948 | 0,08  | 0,930849936 | 0,08  | 0,94191438  | 1,1   | 0,037633713 | 0,33  | 0,765809384 |
| Slc35b3  | -0,14 | 0,829198831 | 0,28  | 0,667170465 | 0,02  | 0,991456043 | 0,1   | 0,849242587 | -0,02 | 0,983469081 |
| Slc35b4  | -0,78 | 0,537473384 | -0,62 | 0,212341437 | 0,77  | 0,26606314  | 1,2   | 0,115795315 | -0,3  | 0,756739482 |
| Slc35c1  | -0,21 | 0,791324789 | 0,29  | 0,80192513  | 0,04  | 0,984647315 | 0,14  | 0,806500539 | -0,06 | 0,944318268 |
| Slc35c2  | -0,02 | 0,988509744 | 0,24  | 0,649542145 | 0,42  | 0,506222058 | 0,01  | 0,99420889  | -0,27 | 0,813308036 |
| Slc35d1  | -0,16 | 0,813220024 | -0,05 | 0,963706806 | 0,02  | 0,989336214 | 1,22  | 0,258992286 | 0,71  | 0,561579401 |
| Slc35d2  | -0,52 | 0,52432471  | 0,46  | 0,657762603 | 0,8   | 0,70055782  | -0,8  | 0,161137645 | 0,02  | 0,984632256 |
| Slc35d3  | -0,16 | 0,698332739 | 0,1   | 0,83804532  | 0,16  | 0,829099961 | 0,16  | 0,826088572 | 0,12  | 0,889954957 |
| Slc35e1  | -0,16 | 0,785516518 | -0,36 | 0,634920127 | 0,41  | 0,542398079 | 0,61  | 0,27932245  | -0,24 | 0,796586414 |
| Slc35e2  | -0,24 | 0,742891615 | 0,42  | 0,444058759 | -0,12 | 0,904573436 | -0,22 | 0,530525352 | 0,54  | 0,318394434 |
| Slc35e3  | -0,06 | 0,944991778 | -0,26 | 0,796382388 | 0,02  | 0,984778342 | -0,48 | 0,575297022 | -0,09 | 0,953297732 |
| Slc35e4  | -0,41 | 0,470166881 | -0,21 | 0,732847182 | 0,22  | 0,712697139 | 0,1   | 0,782872611 | -0,1  | 0,887719506 |



|           |       |             |       |             |       |             |       |             |       |             |
|-----------|-------|-------------|-------|-------------|-------|-------------|-------|-------------|-------|-------------|
| Slc35f1   | -2,03 | 0,016666769 | 1,16  | 0,531993971 | 0,73  | 0,224747376 | -0,76 | 0,354019827 | -0,55 | 0,712786855 |
| Slc35f2   | -0,52 | 0,821267687 | -0,49 | 0,702517334 | 0,01  | 0,997220401 | -1,89 | 0,081012926 | -0,63 | 0,509794733 |
| Slc35f3   | -0,21 | 0,683444889 | 0,16  | 0,919873208 | -0,03 | 0,97218538  | 0,03  | 0,982606049 | -0,21 | 0,744907709 |
| Slc35f4   | 0,09  | 0,892823025 | 0,28  | 0,691863875 | -0,31 | 0,541560473 | -0,4  | 0,37252791  | -0,06 | 0,964779722 |
| Slc35f5   | -0,5  | 0,414026998 | -0,08 | 0,923620953 | -0,6  | 0,466053263 | 0,07  | 0,873610553 | 0,31  | 0,657339897 |
| Slc35f6   | -0,07 | 0,942331022 | 0,14  | 0,77110111  | -0,34 | 0,682301483 | -0,84 | 0,094579932 | -0,27 | 0,689405962 |
| Slc35g1   | -0,19 | 0,696950475 | 0,06  | 0,955382206 | 0,68  | 0,777918093 | -0,03 | 0,944769683 | -0,14 | 0,859663155 |
| Slc35g2   | -0,15 | 0,787157782 | 0,09  | 0,946723366 | 0,21  | 0,789802954 | 0,03  | 0,945953123 | 0,25  | 0,673120647 |
| Slc35g3   | 0     | 0,998027251 | -0,01 | 0,998237793 | -0,29 | 0,814281172 | -0,38 | 0,577049396 | 0,29  | 0,763240477 |
| Slc36a1   | -0,3  | 0,666297306 | -0,32 | 0,620803951 | -0,26 | 0,725962823 | 0,16  | 0,801930792 | -0,04 | 0,968952017 |
| Slc36a1os | 0,33  | 0,619769947 | 0,06  | 0,97301632  | -0,5  | 0,272277033 | -0,19 | 0,841644929 | -0,53 | 0,389664866 |
| Slc36a2   | 0,04  | 0,970154743 | -0,1  | 0,945814774 | -0,01 | 0,997268369 | -0,01 | 0,991962381 | 0,12  | 0,89044341  |
| Slc36a3   | 0,15  | 0,757032046 | -0,13 | 0,808842286 | -0,03 | 0,964352611 | 0,19  | 0,710125533 | -0,1  | 0,915067495 |
| Slc36a3os | 0,15  | 0,717112407 | -0,03 | 0,951036828 | -0,17 | 0,780562751 | 0,05  | 0,91199183  | 0     | 0,999775166 |
| Slc36a4   | -0,44 | 0,42935185  | -0,55 | 0,19876663  | 0,68  | 0,193145507 | -0,36 | 0,318536298 | -0,04 | 0,969617491 |
| Slc37a1   | 0     | 0,998769353 | 0,23  | 0,862430716 | 0,02  | 0,989491273 | -1,74 | 0,084283501 | 1,11  | 0,135418412 |
| Slc37a2   | 0,09  | 0,911404262 | -0,95 | 0,109267475 | 0,18  | 0,798320169 | 0,75  | 0,116548873 | -0,35 | 0,574285481 |
| Slc37a3   | -0,33 | 0,619127292 | -0,3  | 0,777930951 | 0,56  | 0,653810439 | 0,71  | 0,150910046 | -0,35 | 0,559845734 |
| Slc37a4   | -0,29 | 0,70137787  | -0,31 | 0,729172466 | 0,17  | 0,870377336 | -0,15 | 0,884707915 | 0,08  | 0,948759136 |
| Slc38a1   | -0,37 | 0,773078788 | 0,51  | 0,700464647 | 2,02  | 0,14251251  | 1,93  | 0,051209698 | -0,6  | 0,48229889  |
| Slc38a10  | -0,37 | 0,507090099 | -0,73 | 0,19811774  | -0,29 | 0,744387748 | 1,19  | 0,186116773 | 0,21  | 0,870167038 |
| Slc38a11  | -0,26 | 0,749658322 | -0,21 | 0,817110093 | 0,31  | 0,811424918 | -1,3  | 0,34431821  | -1,02 | 0,508153495 |
| Slc38a2   | -0,2  | 0,681371768 | 0,07  | 0,887493001 | -0,07 | 0,940680074 | 0,01  | 0,992122703 | 0,11  | 0,905581898 |
| Slc38a3   | -0,17 | 0,760264985 | -0,66 | 0,767178812 | 0,36  | 0,579136238 | 0,74  | 0,376631277 | -0,41 | 0,623214829 |
| Slc38a4   | 0,19  | 0,834200067 | -0,37 | 0,548858367 | -0,06 | 0,972071294 | -0,36 | 0,277695735 | -0,29 | 0,721622418 |
| Slc38a5   | 0,06  | 0,932324918 | -0,28 | 0,748123243 | -0,46 | 0,543175353 | 0,34  | 0,554988456 | 0,06  | 0,954316248 |
| Slc38a6   | 0,48  | 0,421029929 | 0,19  | 0,707071624 | -1,09 | 0,182660626 | 0,9   | 0,155549579 | -0,24 | 0,83415023  |
| Slc38a7   | -0,09 | 0,95290436  | 0,48  | 0,764299173 | 0,69  | 0,720069267 | -0,3  | 0,829589733 | 0,44  | 0,724669859 |
| Slc38a8   | 0,21  | 0,834886413 | -0,18 | 0,89034555  | -0,09 | 0,919754592 | 0,39  | 0,674206544 | -0,43 | 0,590668102 |
| Slc38a9   | -0,07 | 0,895129557 | 0     | 1           | 1,11  | 0,211487686 | -0,24 | 0,481470885 | -0,48 | 0,300892186 |
| Slc39a1   | -0,08 | 0,886741208 | -0,36 | 0,602956592 | 0,34  | 0,497205965 | 0,72  | 0,187648401 | -0,14 | 0,881943508 |
| Slc39a10  | -0,9  | 0,343001966 | -0,34 | 0,66315423  | 0,88  | 0,480555502 | -0,13 | 0,872512015 | -0,42 | 0,590396118 |
| Slc39a11  | -0,15 | 0,84900712  | -0,07 | 0,913318606 | 0,01  | 0,994838841 | 0,53  | 0,315746559 | -0,05 | 0,968130547 |
| Slc39a12  | 0,2   | 0,778869381 | -0,12 | 0,803710289 | 0,07  | 0,935978536 | -0,02 | 0,977322993 | -0,01 | 0,994082397 |
| Slc39a13  | -0,36 | 0,468284568 | -0,29 | 0,561842393 | -0,16 | 0,816883729 | 0,54  | 0,214141867 | -0,1  | 0,9039404   |

|          |       |             |       |             |       |             |       |             |       |             |
|----------|-------|-------------|-------|-------------|-------|-------------|-------|-------------|-------|-------------|
| Slc39a14 | -0,3  | 0,538658162 | -0,09 | 0,904698551 | 0,21  | 0,829543101 | 0,5   | 0,362337687 | -0,36 | 0,60105426  |
| Slc39a2  | 0,41  | 0,573267041 | 0,19  | 0,833015326 | -0,07 | 0,94665439  | 0,33  | 0,461412838 | 0,7   | 0,299914055 |
| Slc39a3  | -0,21 | 0,663119768 | 0,12  | 0,845663274 | -0,19 | 0,777810365 | -0,32 | 0,564245683 | -0,25 | 0,745574572 |
| Slc39a4  | -0,42 | 0,718901325 | -0,6  | 0,568187167 | 0,48  | 0,810959949 | 0,54  | 0,582946737 | -0,94 | 0,228528398 |
| Slc39a5  | -0,17 | 0,799541413 | -0,13 | 0,866528809 | -0,15 | 0,881441308 | 0,14  | 0,908342208 | 0,21  | 0,911759605 |
| Slc39a6  | 0,14  | 0,760032001 | 0,23  | 0,694017753 | 0,83  | 0,435784914 | 0,27  | 0,528266679 | 0,56  | 0,290772983 |
| Slc39a7  | -0,18 | 0,70137787  | -0,19 | 0,786394409 | 0,84  | 0,202239836 | 0,55  | 0,109979886 | -0,09 | 0,928764431 |
| Slc39a8  | -1,21 | 0,104092085 | -0,23 | 0,847885195 | -0,2  | 0,840915336 | 0,34  | 0,830247309 | 0,41  | 0,845218636 |
| Slc39a9  | -0,63 | 0,301180874 | -0,18 | 0,817110093 | 0,36  | 0,475629395 | -0,01 | 0,994452691 | -0,36 | 0,629070432 |
| Slc3a1   | 0,08  | 0,946111213 | 0,24  | 0,870710009 | 0,38  | 0,677592761 | -0,94 | 0,239956061 | 0,78  | 0,391121911 |
| Slc3a2   | 0,74  | 0,180356049 | 0,31  | 0,456156525 | -0,51 | 0,280780716 | -1,35 | 0,010913137 | -0,14 | 0,814438115 |
| Slc40a1  | 0,03  | 0,989242972 | 0,41  | 0,341246774 | -0,18 | 0,960086317 | -0,04 | 0,947809027 | -0,19 | 0,8736151   |
| Slc41a1  | -0,69 | 0,212230215 | -0,46 | 0,293053317 | 0,88  | 0,203107553 | 0,5   | 0,137576047 | -0,37 | 0,440430574 |
| Slc41a2  | -1,1  | 0,36624708  | -0,16 | 0,958545812 | 0,76  | 0,371340619 | 0,75  | 0,35953164  | -0,24 | 0,891925115 |
| Slc41a3  | -0,63 | 0,324263351 | -0,48 | 0,693065774 | 0,66  | 0,326054745 | -0,19 | 0,909887716 | -0,37 | 0,820879187 |
| Slc43a1  | -1,25 | 0,286679777 | -1,09 | 0,109267475 | 0,69  | 0,411884367 | 1,97  | 0,012133208 | -0,06 | 0,948117662 |
| Slc43a2  | -0,17 | 0,88948467  | -0,98 | 0,527287574 | -0,16 | 0,891689344 | 0,64  | 0,337938676 | -0,83 | 0,190971132 |
| Slc43a3  | 0,13  | 0,826083295 | 0,26  | 0,62432723  | -0,62 | 0,114371659 | -1,41 | 0,009870967 | 0,15  | 0,819072786 |
| Slc44a1  | 0,09  | 0,909885273 | -0,13 | 0,817367084 | 0,13  | 0,879141223 | -0,79 | 0,078238769 | -0,6  | 0,271459443 |
| Slc44a2  | 0     | 0,999288019 | -0,4  | 0,342860303 | 0,19  | 0,888921789 | -0,84 | 0,035685356 | -0,02 | 0,979338129 |
| Slc44a3  | 0,5   | 0,358271337 | 0,41  | 0,490062205 | 0,51  | 0,431081919 | 0,07  | 0,906676611 | -0,17 | 0,800540569 |
| Slc44a4  | 0,13  | 0,813853666 | 0,23  | 0,794036677 | -0,12 | 0,898935616 | -0,09 | 0,869644465 | 0,1   | 0,91404265  |
| Slc44a5  | 0,21  | 0,700672647 | -0,9  | 0,521685055 | 0,09  | 0,939885989 | 0,14  | 0,943143586 | -0,83 | 0,588685273 |
| Slc45a1  | 0,04  | 0,95538722  | -0,08 | 0,928267096 | 0,07  | 0,948904618 | 0,12  | 0,819104901 | -0,15 | 0,847190413 |
| Slc45a2  | -0,11 | 0,860073468 | -0,33 | 0,4201554   | 0,55  | 0,230491024 | -0,13 | 0,758519001 | -0,11 | 0,911405578 |
| Slc45a3  | 0,01  | 0,995438679 | 0,2   | 0,750555245 | -0,62 | 0,495166869 | -0,93 | 0,115955528 | 0,67  | 0,523279017 |
| Slc45a4  | 0,43  | 0,485159825 | 0,49  | 0,545692353 | -0,12 | 0,937228304 | 0,5   | 0,729299699 | -0,18 | 0,927536545 |
| Slc46a1  | -0,07 | 0,903817676 | 0,25  | 0,726275999 | 0,23  | 0,736555563 | -0,2  | 0,742706747 | -0,57 | 0,253125485 |
| Slc46a2  | 0,27  | 0,676387559 | 0,38  | 0,68433825  | -0,03 | 0,97674065  | -0,37 | 0,278375837 | 0,06  | 0,952462776 |
| Slc46a3  | 0,6   | 0,428049245 | 0,55  | 0,212341437 | -0,98 | 0,14251251  | 0,54  | 0,256790046 | 0,35  | 0,616700013 |
| Slc47a1  | 0,4   | 0,39713821  | 0,17  | 0,746794144 | -0,68 | 0,173251231 | -0,13 | 0,807661309 | 0,59  | 0,360718516 |
| Slc47a2  | -0,27 | 0,54401985  | 0,01  | 0,99804971  | -0,08 | 0,922318683 | -0,46 | 0,248377606 | -0,14 | 0,861038502 |
| Slc48a1  | 0,2   | 0,664036618 | 0,49  | 0,620236896 | 0,11  | 0,950846671 | -1,16 | 0,014348756 | -0,16 | 0,81665045  |
| Slc4a1   | -0,19 | 0,757751953 | 0,23  | 0,904698551 | -0,66 | 0,547759601 | -0,71 | 0,642729506 | -0,33 | 0,832848337 |
| Slc4a10  | 0,11  | 0,89081819  | 0,18  | 0,750325684 | -0,58 | 0,436827113 | -0,24 | 0,74417234  | -0,1  | 0,939948423 |

|          |       |             |       |             |       |             |       |             |       |             |
|----------|-------|-------------|-------|-------------|-------|-------------|-------|-------------|-------|-------------|
| Slc4a11  | 0,4   | 0,597082878 | -0,08 | 0,953631922 | 0,69  | 0,138915123 | -0,09 | 0,962371269 | -0,06 | 0,979456872 |
| Slc4a1ap | -0,2  | 0,691942071 | -0,39 | 0,325242663 | -0,19 | 0,858209814 | 0,63  | 0,130495864 | -0,03 | 0,97425848  |
| Slc4a2   | -0,45 | 0,446515613 | -0,2  | 0,730745583 | 0,21  | 0,773851841 | 0,06  | 0,894580364 | -0,07 | 0,928671864 |
| Slc4a3   | -0,09 | 0,845813494 | 0,1   | 0,901000778 | 0,11  | 0,930193129 | -0,81 | 0,071772884 | -0,5  | 0,456564217 |
| Slc4a4   | -0,01 | 0,996219097 | -0,03 | 0,954378914 | 0,57  | 0,529990721 | -1,96 | 0,078238769 | 0,89  | 0,388661175 |
| Slc4a5   | -0,1  | 0,832947001 | 0,06  | 0,934294134 | -0,29 | 0,688298291 | 0,19  | 0,814810741 | 0,02  | 0,987948597 |
| Slc4a7   | -0,06 | 0,953506048 | 0,12  | 0,891532732 | -0,08 | 0,937463223 | 1,77  | 0,035951873 | 0,97  | 0,198575493 |
| Slc4a8   | -0,92 | 0,142347138 | -0,41 | 0,800591362 | 0,31  | 0,586511891 | 0,89  | 0,400806453 | 0,12  | 0,904830156 |
| Slc4a9   | -0,13 | 0,844688163 | -0,36 | 0,373555617 | 0,04  | 0,968677508 | 0,27  | 0,519102169 | 0,27  | 0,699060093 |
| Slc50a1  | 0,5   | 0,230480093 | 0,23  | 0,734307356 | -0,33 | 0,551698156 | -1,5  | 0,01328151  | -0,2  | 0,712121015 |
| Slc51a   | 0,02  | 0,988414371 | 0,16  | 0,857388191 | -0,06 | 0,942274338 | -0,01 | 0,991962381 | 0,32  | 0,794366085 |
| Slc51b   | 0,04  | 0,963914207 | 0,43  | 0,74760299  | -0,26 | 0,687268336 | -0,52 | 0,415620368 | 0,08  | 0,960065122 |
| Slc52a2  | 0,11  | 0,798333389 | -0,28 | 0,785573503 | 0,44  | 0,593002957 | 0,32  | 0,452631406 | -0,13 | 0,881613493 |
| Slc52a3  | -0,73 | 0,249044729 | -0,02 | 0,986535927 | -0,14 | 0,920858287 | -0,36 | 0,496533512 | 0,03  | 0,975441362 |
| Slc5a1   | -0,15 | 0,78682706  | -0,5  | 0,585330659 | -0,41 | 0,506787649 | 0,24  | 0,6447962   | -0,04 | 0,967860497 |
| Slc5a10  | 0,67  | 0,190677329 | -0,03 | 0,989633095 | -0,13 | 0,876229428 | -0,07 | 0,896599656 | 0,16  | 0,845218636 |
| Slc5a11  | -0,07 | 0,959466597 | -0,29 | 0,750555245 | -0,46 | 0,647988621 | 0,17  | 0,835175707 | 0,29  | 0,684266387 |
| Slc5a12  | -0,12 | 0,844968554 | -0,08 | 0,9369583   | -0,18 | 0,830336321 | -0,32 | 0,676740124 | -0,26 | 0,785294197 |
| Slc5a2   | 0,01  | 0,995886183 | -0,33 | 0,646170664 | -0,18 | 0,739825929 | 0,11  | 0,921423877 | -0,12 | 0,917844354 |
| Slc5a3   | 0,51  | 0,54401985  | 0,13  | 0,944172549 | -0,76 | 0,270205134 | -0,9  | 0,316363734 | 0,34  | 0,759953618 |
| Slc5a4a  | 0,44  | 0,212784334 | -0,2  | 0,893044986 | -0,22 | 0,775807039 | 0,03  | 0,983166423 | 0,05  | 0,979456872 |
| Slc5a4b  | 0,09  | 0,90814211  | -0,26 | 0,625401956 | 0,13  | 0,932577939 | -0,03 | 0,97507484  | -0,28 | 0,739121045 |
| Slc5a5   | -0,17 | 0,833382917 | -0,2  | 0,72091169  | -0,05 | 0,963715469 | 0,1   | 0,869148815 | -0,29 | 0,681187459 |
| Slc5a6   | 0,44  | 0,689253784 | -0,2  | 0,896187678 | 0,28  | 0,879127552 | -0,84 | 0,072282802 | -0,47 | 0,725587145 |
| Slc5a7   | 0,28  | 0,717407143 | -0,07 | 0,923044405 | 0,07  | 0,952888594 | 0,28  | 0,698619718 | -0,12 | 0,889106241 |
| Slc5a8   | 0,23  | 0,786709661 | -0,26 | 0,574304911 | -0,24 | 0,794567505 | -0,16 | 0,870376128 | 0,56  | 0,734042268 |
| Slc5a9   | 0,15  | 0,859931756 | 0,22  | 0,703291096 | 0,02  | 0,976350824 | 0,23  | 0,77238043  | 0,23  | 0,823098095 |
| Slc6a1   | 0,13  | 0,858269816 | 0,17  | 0,86245211  | -0,21 | 0,715497532 | -0,03 | 0,951803857 | -0,19 | 0,745574572 |
| Slc6a11  | 0,64  | 0,319925488 | 0,19  | 0,82505545  | -0,43 | 0,543696688 | -0,07 | 0,90264563  | -0,12 | 0,897354716 |
| Slc6a12  | -0,07 | 0,894036659 | -0,02 | 0,984006421 | 0,49  | 0,359370436 | -0,1  | 0,884326814 | -0,06 | 0,955762408 |
| Slc6a13  | -0,47 | 0,363930021 | -0,01 | 0,994802028 | -0,52 | 0,551774227 | -0,35 | 0,453588169 | 0,03  | 0,984045522 |
| Slc6a14  | -0,21 | 0,823402057 | -0,17 | 0,855702031 | 0,17  | 0,734181708 | 0,02  | 0,986768223 | -0,09 | 0,927536545 |
| Slc6a15  | -0,38 | 0,563164718 | -0,42 | 0,501780857 | -0,4  | 0,440550754 | 0,08  | 0,900691702 | 0,07  | 0,949544475 |
| Slc6a16  | 0,41  | 0,328021998 | 0,05  | 0,971499809 | 0,49  | 0,492943578 | -0,09 | 0,927360713 | -0,34 | 0,71621363  |
| Slc6a17  | 0,13  | 0,853698254 | -0,14 | 0,825984851 | -0,19 | 0,807486378 | -0,3  | 0,588433913 | -0,09 | 0,921873336 |

|           |       |             |       |             |       |             |       |             |       |             |
|-----------|-------|-------------|-------|-------------|-------|-------------|-------|-------------|-------|-------------|
| Slc6a18   | -0,25 | 0,535827944 | -0,32 | 0,630199793 | 0,05  | 0,957327097 | 0,01  | 0,993646757 | 0,3   | 0,748257749 |
| Slc6a19   | 0,06  | 0,948926586 | -0,21 | 0,807808388 | -0,37 | 0,432237596 | 0,31  | 0,61015424  | 0,98  | 0,515021287 |
| Slc6a19os | 0,29  | 0,704720946 | 0,13  | 0,817110093 | 0,2   | 0,739945591 | -0,23 | 0,595767103 | -0,14 | 0,869765418 |
| Slc6a2    | 0,12  | 0,845137004 | -0,75 | 0,255730657 | 0     | 0,997439771 | 0,44  | 0,352630383 | -0,14 | 0,866285506 |
| Slc6a20a  | 0     | 0,999288019 | -0,45 | 0,345535775 | -0,39 | 0,568962531 | 0,15  | 0,716478691 | 0,08  | 0,935288547 |
| Slc6a20b  | 0,12  | 0,833900133 | 0,14  | 0,818301748 | -0,82 | 0,13265466  | -0,37 | 0,715220925 | 0,37  | 0,802066551 |
| Slc6a3    | -0,1  | 0,936051646 | 0,15  | 0,828219939 | 0,04  | 0,985326269 | 0,08  | 0,945953123 | 0,4   | 0,668068817 |
| Slc6a4    | -0,09 | 0,936139343 | 0,21  | 0,829923566 | 0,38  | 0,628048897 | -0,66 | 0,177452749 | -0,36 | 0,673577848 |
| Slc6a5    | 0,39  | 0,421029929 | -0,11 | 0,855632384 | -0,15 | 0,887630371 | -0,01 | 0,988205241 | -0,22 | 0,864540232 |
| Slc6a6    | -1,02 | 0,115293255 | -0,74 | 0,4411787   | 1,34  | 0,252464368 | -4,48 | 0,003977829 | -0,74 | 0,235574745 |
| Slc6a7    | 0,23  | 0,782444477 | 0,07  | 0,958545812 | -0,1  | 0,884854874 | -0,18 | 0,743093921 | -0,61 | 0,206819215 |
| Slc6a8    | -0,25 | 0,854532238 | 0,06  | 0,955891382 | 0,55  | 0,197507065 | -1,03 | 0,086452922 | -1    | 0,044184099 |
| Slc6a9    | -0,91 | 0,343457563 | 0,83  | 0,149853792 | -0,41 | 0,62535327  | -1,68 | 0,024850224 | 1,1   | 0,098490291 |
| Slc7a1    | -0,11 | 0,866989155 | 0,12  | 0,812459283 | 0,28  | 0,709814408 | 0,42  | 0,467580023 | 0,46  | 0,579739537 |
| Slc7a10   | 0,11  | 0,853351904 | 0,06  | 0,9152526   | -0,26 | 0,720590502 | -0,19 | 0,586887461 | -0,08 | 0,91423979  |
| Slc7a11   | 0,47  | 0,84900712  | -0,69 | 0,677026666 | 1,57  | 0,268215952 | 1,86  | 0,008746145 | 0,51  | 0,446071089 |
| Slc7a12   | 0,29  | 0,421378808 | 0,21  | 0,786394409 | -0,13 | 0,835677021 | -0,68 | 0,254444179 | -0,2  | 0,871015717 |
| Slc7a13   | 0,03  | 0,963228289 | 0,03  | 0,984409329 | 0,11  | 0,856605654 | 0,27  | 0,516978084 | 0,41  | 0,511300791 |
| Slc7a14   | -0,29 | 0,656874342 | -0,02 | 0,994735911 | 0,58  | 0,65260043  | 0,33  | 0,482571177 | -0,04 | 0,969493522 |
| Slc7a15   | 0,29  | 0,559950429 | -0,05 | 0,956049982 | -0,22 | 0,712697139 | -0,02 | 0,979406248 | 0,16  | 0,781172165 |
| Slc7a2    | 0,06  | 0,953175228 | 0,35  | 0,693906911 | 0,28  | 0,809137779 | -1,4  | 0,111487533 | -0,61 | 0,549181666 |
| Slc7a3    | 0,69  | 0,412606459 | 0,11  | 0,907235638 | 0,25  | 0,746570045 | 0,05  | 0,95047287  | 0,77  | 0,34132728  |
| Slc7a4    | -0,3  | 0,661993372 | 0,05  | 0,970832543 | -0,11 | 0,917672398 | -0,2  | 0,853419763 | -0,36 | 0,731527639 |
| Slc7a5    | -1,75 | 0,119534183 | -0,67 | 0,277253387 | 1,26  | 0,085303139 | 2,19  | 0,003977829 | 0,85  | 0,056404855 |
| Slc7a6    | -0,97 | 0,106666298 | -0,21 | 0,669073556 | 0,46  | 0,461405645 | 0,74  | 0,181954316 | -0,34 | 0,748384297 |
| Slc7a6os  | 0,1   | 0,833275012 | 0,23  | 0,791426435 | -0,43 | 0,500849254 | -0,27 | 0,671576377 | 0,43  | 0,587735967 |
| Slc7a7    | 0,5   | 0,348729432 | -0,08 | 0,955408461 | 0,52  | 0,548288344 | 2,05  | 0,022696538 | -0,66 | 0,278240482 |
| Slc7a8    | 0,65  | 0,412817433 | -0,32 | 0,735554037 | 0,54  | 0,777568498 | -1,1  | 0,280843942 | -0,45 | 0,753273319 |
| Slc7a9    | 0,37  | 0,506476054 | 0,13  | 0,880362561 | -0,03 | 0,973186233 | -0,29 | 0,65999529  | 0,02  | 0,981929481 |
| Slc8a1    | 0,17  | 0,8634587   | -0,13 | 0,940525711 | 0,68  | 0,325842697 | -0,95 | 0,194340274 | -0,42 | 0,585244465 |
| Slc8a2    | -0,02 | 0,988674093 | 0,35  | 0,741888655 | -0,03 | 0,990644839 | -0,36 | 0,378237569 | -0,28 | 0,781695577 |
| Slc8a3    | 0,22  | 0,672934635 | 0,05  | 0,954823222 | -0,04 | 0,968004288 | -0,16 | 0,742313334 | 0,15  | 0,887815327 |
| Slc8b1    | -0,19 | 0,714662474 | -0,06 | 0,894571363 | 0,06  | 0,944078985 | -0,54 | 0,220929595 | -0,28 | 0,83296791  |
| Slc9a1    | -0,36 | 0,52759289  | -0,09 | 0,847483504 | 0,26  | 0,660394995 | -0,35 | 0,495340036 | -0,26 | 0,733488478 |
| Slc9a2    | -0,02 | 0,990581355 | 0,44  | 0,790939978 | 0,39  | 0,552409541 | -0,58 | 0,213931075 | -0,15 | 0,915238726 |

|           |       |             |       |             |       |             |       |             |       |             |
|-----------|-------|-------------|-------|-------------|-------|-------------|-------|-------------|-------|-------------|
| Slc9a3    | -0,17 | 0,852363306 | -0,05 | 0,922703368 | -0,19 | 0,817269545 | -0,48 | 0,586887461 | -0,19 | 0,879206646 |
| Slc9a3r1  | -0,35 | 0,410222229 | 0,11  | 0,882847123 | 0,45  | 0,38818495  | -0,97 | 0,031813193 | 0,24  | 0,766252538 |
| Slc9a3r2  | -0,27 | 0,541417213 | -0,35 | 0,626130765 | -0,23 | 0,826241249 | -1,71 | 0,031106287 | -0,4  | 0,612129308 |
| Slc9a4    | 0,44  | 0,306829062 | 0,16  | 0,840864779 | -0,03 | 0,967127816 | -0,02 | 0,982398921 | 0,32  | 0,530072156 |
| Slc9a5    | -0,19 | 0,779344514 | -0,72 | 0,435489861 | 0,32  | 0,779428    | 0,4   | 0,530766711 | -0,67 | 0,414033358 |
| Slc9a6    | -0,42 | 0,662972167 | 0,5   | 0,564634931 | 1,55  | 0,090593684 | -1,16 | 0,212468692 | 0,06  | 0,97425848  |
| Slc9a7    | -0,24 | 0,687662951 | 0,47  | 0,703923817 | 0,67  | 0,171388572 | -0,37 | 0,501181684 | -0,43 | 0,666758661 |
| Slc9a8    | 0,31  | 0,617280733 | 0,15  | 0,915169542 | -0,28 | 0,806044178 | -0,29 | 0,740510034 | 0,01  | 0,990091016 |
| Slc9a9    | 0,04  | 0,980474127 | -0,27 | 0,760600519 | 0,94  | 0,29720793  | -0,85 | 0,113591681 | 0,23  | 0,744117522 |
| Slc9b1    | 0,12  | 0,897232138 | -0,29 | 0,624712123 | -0,24 | 0,605819528 | 0,2   | 0,663875303 | 0,12  | 0,890797922 |
| Slc9b2    | 0,05  | 0,935140077 | -0,1  | 0,864989815 | -0,15 | 0,84847388  | -0,29 | 0,577432583 | -0,34 | 0,631138048 |
| Slc9c1    | -0,34 | 0,675389782 | -0,2  | 0,750273889 | 0,01  | 0,993102564 | -0,04 | 0,957573971 | -0,04 | 0,974553568 |
| Slco1a1   | 0,38  | 0,474777426 | -0,21 | 0,822581347 | 0,1   | 0,904239687 | 0,17  | 0,760142338 | -0,31 | 0,573405587 |
| Slco1a4   | 0,01  | 0,995658455 | -0,19 | 0,820557322 | 0,02  | 0,990699622 | -2,77 | 0,006322963 | -2,38 | 0,003370432 |
| Slco1a5   | 0,18  | 0,793150801 | 0,38  | 0,716668427 | -0,14 | 0,9113279   | -0,24 | 0,666992499 | 0,02  | 0,980961333 |
| Slco1a6   | 0,52  | 0,468135601 | 0,07  | 0,952649316 | -0,33 | 0,705811313 | -0,14 | 0,89953888  | 0,39  | 0,811321326 |
| Slco1b2   | 0,22  | 0,673291416 | 0,39  | 0,531706188 | 0,01  | 0,990836784 | 0,09  | 0,888090219 | 0,09  | 0,923951087 |
| Slco1c1   | 0,13  | 0,84900712  | 0,06  | 0,921821409 | -0,1  | 0,894109709 | -0,29 | 0,408177638 | -0,06 | 0,937558003 |
| Slco2a1   | -0,41 | 0,353022744 | -0,64 | 0,483507011 | 0,59  | 0,391889599 | -0,85 | 0,090583584 | -0,68 | 0,209387396 |
| Slco2b1   | -0,93 | 0,333609372 | -1,31 | 0,15948775  | 0,5   | 0,532626868 | 1,17  | 0,035655242 | -0,9  | 0,193796626 |
| Slco3a1   | 1,6   | 0,096554464 | 1,58  | 0,13937019  | -0,83 | 0,102598343 | -1,14 | 0,093090752 | 0,62  | 0,1633922   |
| Slco4a1   | -0,52 | 0,37023946  | 0,62  | 0,393251171 | 1,26  | 0,142272657 | -1,06 | 0,253294027 | 0,94  | 0,511962622 |
| Slco4c1   | -0,27 | 0,708296676 | 0,12  | 0,832841509 | 0,05  | 0,963775512 | 0,03  | 0,975687196 | -0,04 | 0,971058066 |
| Slco5a1   | 0,35  | 0,555287219 | 0,17  | 0,932628106 | -0,13 | 0,930836343 | 0,27  | 0,57819548  | 0,09  | 0,916173996 |
| Slco6b1   | 0,01  | 0,991216662 | 0,04  | 0,972706967 | -0,15 | 0,794567505 | 0,15  | 0,771388917 | 0,06  | 0,94989088  |
| Slco6c1   | 0,07  | 0,937415031 | -0,2  | 0,82263744  | -0,05 | 0,948085051 | 0,06  | 0,919126119 | -0,14 | 0,832994371 |
| Slco6d1   | 0,16  | 0,864526424 | -0,14 | 0,858064544 | 0,02  | 0,990836784 | 0,15  | 0,794165367 | -0,52 | 0,53166502  |
| Slf1      | -0,84 | 0,523005201 | -0,23 | 0,849047797 | 0,12  | 0,919116989 | 0,39  | 0,732130462 | 0,22  | 0,869710279 |
| Slfn1     | 0,25  | 0,672934635 | -0,06 | 0,923051261 | -0,19 | 0,806675912 | 0,29  | 0,437635562 | 0,38  | 0,479560208 |
| Slfn10-ps | 0,29  | 0,660482793 | -0,36 | 0,541570411 | -1,06 | 0,423885191 | 1,22  | 0,200972441 | 1,35  | 0,131482799 |
| Slfn14    | 0,5   | 0,293334505 | -0,45 | 0,49252156  | -0,07 | 0,94940954  | -0,05 | 0,924110762 | -0,05 | 0,960912248 |
| Slfn2     | 0,89  | 0,25072698  | 1,1   | 0,100428178 | -1,08 | 0,13589176  | -1,36 | 0,111487533 | 1,05  | 0,16385454  |
| Slfn3     | -0,16 | 0,869565514 | 0,74  | 0,470534977 | -1,32 | 0,157143502 | -2,45 | 0,017899513 | 0,87  | 0,097686358 |
| Slfn4     | -0,02 | 0,980085387 | 0,51  | 0,733269724 | -1,44 | 0,29193571  | 0,73  | 0,563779179 | 1,47  | 0,281237596 |
| Slfn5     | 0,62  | 0,231812139 | 0,68  | 0,158696948 | -0,75 | 0,124912754 | -0,56 | 0,124505112 | 0,61  | 0,166318063 |

|         |       |             |       |             |       |             |       |             |       |             |
|---------|-------|-------------|-------|-------------|-------|-------------|-------|-------------|-------|-------------|
| Sln5os  | 0,53  | 0,316599006 | 0,27  | 0,578047349 | -0,46 | 0,446189252 | -0,59 | 0,13409404  | -0,43 | 0,503166372 |
| Sln9    | 0,31  | 0,597519827 | 0,1   | 0,931001523 | -0,25 | 0,785392447 | 0,63  | 0,35953164  | 1,21  | 0,049701349 |
| Slnl1   | 0,7   | 0,215332386 | -0,51 | 0,285738185 | -0,16 | 0,891500876 | 0,01  | 0,979477685 | -0,09 | 0,940438527 |
| Slirp   | 0,28  | 0,707502054 | -0,22 | 0,751116121 | -0,3  | 0,537504575 | -0,04 | 0,969249737 | 0,29  | 0,715928244 |
| Slit1   | 0,29  | 0,55640978  | -0,1  | 0,859649563 | -0,19 | 0,777438724 | 0,33  | 0,635869722 | 0,18  | 0,858534673 |
| Slit2   | 0,79  | 0,239601221 | -1,09 | 0,348856843 | 0,17  | 0,859198005 | -0,19 | 0,764809153 | -0,5  | 0,297630324 |
| Slit3   | -0,63 | 0,205244362 | 0,03  | 0,964757836 | -0,02 | 0,980801972 | -2,99 | 0,003907268 | -1,18 | 0,028812573 |
| Slitrk1 | 0,31  | 0,545805455 | -0,04 | 0,926353869 | -0,35 | 0,473305474 | -0,05 | 0,923775458 | -0,09 | 0,925171662 |
| Slitrk2 | 0,21  | 0,764288636 | 0,24  | 0,855607772 | -0,02 | 0,992201196 | 0,04  | 0,931250259 | 0,04  | 0,976045403 |
| Slitrk3 | 0,06  | 0,909232325 | 0     | 0,998504901 | -0,36 | 0,560376292 | -0,09 | 0,87811903  | -0,07 | 0,952190189 |
| Slitrk4 | 1,2   | 0,439923667 | -1,42 | 0,140858993 | -0,88 | 0,322097188 | 2,02  | 0,017690913 | -0,15 | 0,887719506 |
| Slitrk5 | 0,13  | 0,794704597 | -0,15 | 0,855954523 | -0,16 | 0,90345282  | 0,08  | 0,944558253 | -0,53 | 0,446990293 |
| Slitrk6 | -0,01 | 0,995438679 | 0,37  | 0,460241239 | 0,12  | 0,851286341 | -0,13 | 0,737157711 | -0,07 | 0,937558003 |
| Slk     | -0,26 | 0,49976831  | -0,21 | 0,741939956 | 0,03  | 0,963199274 | 0,5   | 0,358090259 | 0,48  | 0,403234311 |
| Slmap   | -0,44 | 0,528470252 | -0,14 | 0,858905828 | 0,39  | 0,630836381 | -0,04 | 0,962290391 | 0,02  | 0,984125319 |
| Slmo1   | -0,05 | 0,946792769 | 0,09  | 0,952352299 | -0,14 | 0,860524459 | 0,19  | 0,596934527 | 0,37  | 0,655657337 |
| Slmo2   | -0,41 | 0,401159049 | -0,18 | 0,843162191 | 0,45  | 0,556383203 | 0,54  | 0,500410075 | 0,26  | 0,836630434 |
| Sln     | -0,08 | 0,891309235 | -0,33 | 0,371529423 | -0,02 | 0,990131157 | -0,12 | 0,873282003 | -0,32 | 0,734042268 |
| Slpi    | 0,73  | 0,268283142 | 0,53  | 0,826349245 | 0,74  | 0,577227933 | -0,12 | 0,797103214 | 0,42  | 0,671441327 |
| Sltm    | 0,16  | 0,782586323 | 0,23  | 0,640836969 | 0,1   | 0,868590766 | 0,21  | 0,533332043 | 0,62  | 0,18139918  |
| Slu7    | -0,18 | 0,821267687 | 0,06  | 0,937377463 | -0,04 | 0,976937619 | -0,41 | 0,369060925 | 0     | 0,994270272 |
| Slurp1  | 0,34  | 0,461113298 | 0,12  | 0,883145635 | -0,05 | 0,944441051 | -0,09 | 0,91550193  | 0,09  | 0,933759514 |
| Slx     | 0,12  | 0,917014629 | -0,34 | 0,843162191 | -0,18 | 0,880706627 | 0,35  | 0,789516436 | 0,61  | 0,561876467 |
| Slx1b   | 0,3   | 0,690305869 | -0,21 | 0,883145635 | -0,12 | 0,932577939 | -0,2  | 0,829591443 | -1,31 | 0,048627677 |
| Slx4    | -0,4  | 0,63699384  | -0,54 | 0,546556396 | 0,11  | 0,887630371 | 0,11  | 0,85301747  | -0,43 | 0,451070574 |
| Slx4ip  | 0,59  | 0,358272587 | 0,49  | 0,60897378  | -1,04 | 0,224388258 | 0,49  | 0,564245683 | 0,55  | 0,464702845 |
| Smad1   | -0,28 | 0,53440815  | 0,39  | 0,410501758 | -0,49 | 0,491067095 | 0,78  | 0,073244635 | -0,28 | 0,64934615  |
| Smad2   | -0,14 | 0,795659022 | 0,17  | 0,789051952 | 0,33  | 0,700186861 | 0,19  | 0,601996277 | 0,34  | 0,586214748 |
| Smad3   | -0,14 | 0,883923631 | -0,41 | 0,397249215 | -0,01 | 0,99147958  | 0,83  | 0,292117027 | 0,07  | 0,961251206 |
| Smad4   | 0,16  | 0,849031675 | 0,29  | 0,541301427 | 0,23  | 0,763233047 | -0,16 | 0,646998207 | -0,12 | 0,847312006 |
| Smad5   | -0,13 | 0,776839834 | 0,01  | 0,996113371 | -0,51 | 0,542398079 | 0,65  | 0,308123565 | 0,46  | 0,527689506 |
| Smad6   | -0,05 | 0,959044734 | -0,33 | 0,598969634 | -0,46 | 0,660920525 | -2,53 | 0,015975596 | 0,02  | 0,990091016 |
| Smad7   | -0,22 | 0,800851935 | -0,41 | 0,410501758 | 0,35  | 0,674253263 | -0,7  | 0,428038494 | 0,01  | 0,99257599  |
| Smad9   | 0,22  | 0,783373067 | 0,05  | 0,974702154 | -0,21 | 0,740917728 | -1,12 | 0,236697001 | -0,41 | 0,607626865 |
| Smagp   | 0,29  | 0,445284601 | 0,59  | 0,213731156 | -0,89 | 0,135721222 | -0,43 | 0,16669046  | 0,2   | 0,816731898 |

|            |       |             |       |             |       |             |       |             |       |             |
|------------|-------|-------------|-------|-------------|-------|-------------|-------|-------------|-------|-------------|
| Smapp1     | 0,34  | 0,631688937 | -0,12 | 0,831404974 | -0,14 | 0,894785331 | 0,68  | 0,247679503 | 0,32  | 0,655956123 |
| Smapp2     | -0,45 | 0,215825486 | -0,03 | 0,981236932 | 0,49  | 0,654328013 | 0,58  | 0,103449425 | -0,18 | 0,781777975 |
| Smarca1    | 0,32  | 0,748952023 | 0,05  | 0,956049982 | 0,07  | 0,947881687 | -0,08 | 0,942625291 | 0,26  | 0,817563348 |
| Smarca2    | -0,38 | 0,510434756 | -0,29 | 0,49252156  | 0,08  | 0,953345773 | -0,58 | 0,101239783 | -0,74 | 0,128272484 |
| Smarca4    | -0,17 | 0,672934635 | -0,28 | 0,596930496 | 0,27  | 0,535815256 | 0,29  | 0,433465582 | -0,03 | 0,97206128  |
| Smarca5-ps | 0,39  | 0,552940583 | -0,36 | 0,747707816 | 0,08  | 0,942869444 | 0,66  | 0,646387293 | -0,1  | 0,953825631 |
| Smarcad1   | 0     | 0,996219097 | -0,37 | 0,324289795 | -0,11 | 0,921956183 | 0,28  | 0,611632616 | 0,07  | 0,951154258 |
| Smarcal1   | -0,19 | 0,875555348 | -0,36 | 0,615694739 | 0,41  | 0,679213154 | -0,47 | 0,33347925  | -0,11 | 0,885997162 |
| Smarcb1    | -0,53 | 0,318041432 | -0,25 | 0,609977513 | -0,03 | 0,975581065 | 0,19  | 0,651948925 | -0,63 | 0,223717572 |
| Smarcc1    | -0,55 | 0,302609278 | -0,5  | 0,301487527 | 0,67  | 0,187270439 | 0,82  | 0,039386437 | -0,49 | 0,271713687 |
| Smarcc2    | -0,04 | 0,948291116 | -0,09 | 0,861080951 | 0,24  | 0,713620433 | -0,63 | 0,092031783 | -0,21 | 0,744074927 |
| Smarcd1    | -1,11 | 0,097625832 | 0     | 1           | 0,52  | 0,538341146 | -0,13 | 0,903965681 | -0,98 | 0,208771188 |
| Smarcd2    | -0,23 | 0,62872508  | 0,05  | 0,956934125 | -0,7  | 0,208091516 | -0,13 | 0,874607411 | -0,14 | 0,914176188 |
| Smarcd3    | -0,38 | 0,621037557 | -0,29 | 0,656204868 | 0,52  | 0,263132726 | -0,84 | 0,085940132 | 0,15  | 0,861977667 |
| Smarce1    | -0,63 | 0,236944071 | -0,13 | 0,750555245 | 0,43  | 0,554590123 | 0,43  | 0,18311375  | 0,12  | 0,906189244 |
| Smc1a      | -0,34 | 0,666546952 | 0     | 1           | 0,46  | 0,570786931 | -0,05 | 0,93129706  | -0,07 | 0,949102947 |
| Smc1b      | 0,46  | 0,417482906 | -0,03 | 0,990380046 | -0,08 | 0,925245169 | 0,68  | 0,48767427  | 0,37  | 0,715879151 |
| Smc2       | -0,61 | 0,448406902 | -0,76 | 0,345409693 | 0,97  | 0,140691395 | 1,08  | 0,097848836 | -0,37 | 0,492214222 |
| Smc2os     | 0,09  | 0,869946494 | -0,01 | 0,999210601 | -0,63 | 0,446493846 | -0,1  | 0,910298592 | -0,18 | 0,857116684 |
| Smc3       | -0,14 | 0,80309313  | -0,29 | 0,625875466 | 1,03  | 0,112229182 | -0,13 | 0,8214961   | -0,17 | 0,853071714 |
| Smc4       | -0,21 | 0,672174462 | -0,62 | 0,521685055 | 0,47  | 0,452662171 | 1,05  | 0,234010416 | 0,3   | 0,735582307 |
| Smc5       | -0,16 | 0,791808536 | -0,24 | 0,793603525 | 0,16  | 0,869952072 | 0,41  | 0,603471344 | 0,42  | 0,619958052 |
| Smc6       | -0,37 | 0,417261157 | -0,42 | 0,587634717 | 0,26  | 0,757980709 | 0,05  | 0,962266496 | 0,49  | 0,537590834 |
| Smchd1     | -0,01 | 0,995017356 | 0,26  | 0,676430742 | -0,53 | 0,337885256 | 0,77  | 0,045627289 | 0,5   | 0,246316824 |
| Smco1      | 0,13  | 0,822613889 | 0,33  | 0,544380607 | -0,07 | 0,929395646 | 0,01  | 0,996451727 | -0,07 | 0,943668392 |
| Smco2      | -0,19 | 0,758136438 | -0,04 | 0,965039248 | 0,23  | 0,74860644  | 0,02  | 0,985865561 | -0,12 | 0,88853055  |
| Smco3      | -0,13 | 0,897717279 | -0,03 | 0,978689001 | -0,19 | 0,785676028 | -0,28 | 0,519829855 | -0,42 | 0,557341467 |
| Smco4      | 0,45  | 0,40246275  | 0,37  | 0,661313341 | -0,81 | 0,324705558 | -0,19 | 0,646746982 | 0,42  | 0,406434798 |
| Smcp       | -0,04 | 0,948926586 | -0,27 | 0,60014458  | -0,23 | 0,661747229 | 0,19  | 0,715804103 | -0,18 | 0,829444633 |
| Smcr8      | 0,51  | 0,254980266 | 0,5   | 0,31962509  | -0,1  | 0,903876499 | -0,53 | 0,329957507 | 0,17  | 0,849295769 |
| Smdt1      | -0,13 | 0,764288636 | -0,15 | 0,740517638 | 0,32  | 0,580049353 | 0,11  | 0,790283101 | -0,03 | 0,968130547 |
| Smek1      | 0,06  | 0,927866076 | 0,21  | 0,751316952 | 0     | 0,999571656 | 0,05  | 0,912985122 | 0,17  | 0,793839436 |
| Smek2      | -0,1  | 0,935644409 | 0,47  | 0,371998296 | 0,1   | 0,929871006 | -0,23 | 0,841774179 | -0,05 | 0,976743304 |
| Smek3-ps   | 0,02  | 0,971922167 | 0,15  | 0,747707816 | -0,25 | 0,692591179 | 0     | 1           | 0,05  | 0,958861415 |
| Smg1       | 0,21  | 0,662416763 | 0,26  | 0,588307525 | -0,2  | 0,780528725 | -0,08 | 0,900662145 | 0,44  | 0,465292641 |

|           |       |             |       |             |       |             |       |             |       |             |
|-----------|-------|-------------|-------|-------------|-------|-------------|-------|-------------|-------|-------------|
| Smg5      | -0,06 | 0,909432834 | -0,23 | 0,625481493 | -0,04 | 0,960622365 | 0,39  | 0,282769221 | -0,01 | 0,9939542   |
| Smg6      | 0,13  | 0,858748956 | 0,28  | 0,708168221 | -0,18 | 0,752954039 | -0,74 | 0,080032206 | -0,53 | 0,337492586 |
| Smg7      | -0,17 | 0,732196499 | 0,26  | 0,48761393  | 0,26  | 0,709814408 | -0,08 | 0,832587841 | 0,08  | 0,917110997 |
| Smg8      | 0,04  | 0,962356636 | 0,24  | 0,624712123 | 0,18  | 0,906360615 | -0,53 | 0,118739789 | -0,34 | 0,671305308 |
| Smg9      | 0,19  | 0,733583213 | 0,23  | 0,677981098 | 0,2   | 0,789969951 | 0,01  | 0,989088504 | 0,3   | 0,630186188 |
| Smgc      | 0,03  | 0,978279279 | 0,31  | 0,563458552 | 0,04  | 0,967767582 | -0,14 | 0,711725901 | -0,37 | 0,435396048 |
| Smim1     | 0,19  | 0,63699384  | -0,12 | 0,810418074 | -0,11 | 0,925417014 | -0,22 | 0,594365292 | -0,26 | 0,626176831 |
| Smim10l1  | -0,06 | 0,935607349 | -0,03 | 0,958856577 | 0,42  | 0,370554673 | -0,09 | 0,852596465 | -0,17 | 0,839474287 |
| Smim10l2a | -0,03 | 0,977262651 | -0,28 | 0,608017374 | 0,13  | 0,911921787 | -0,05 | 0,907662772 | -0,02 | 0,990886221 |
| Smim11    | -0,04 | 0,946606246 | 0,02  | 0,980518468 | 0,29  | 0,774393816 | -0,19 | 0,71050512  | 0,06  | 0,954316248 |
| Smim12    | -0,08 | 0,911158473 | -0,24 | 0,76677473  | 0,15  | 0,848462153 | 0,57  | 0,407226548 | -0,11 | 0,954657649 |
| Smim13    | -0,22 | 0,661010124 | 0,11  | 0,815416975 | -0,18 | 0,830514771 | 0,47  | 0,494422413 | 0,13  | 0,89529118  |
| Smim14    | -0,06 | 0,919567534 | 0,34  | 0,490062205 | 0,14  | 0,918291931 | -0,91 | 0,027595772 | -0,14 | 0,839824817 |
| Smim15    | -0,43 | 0,545426845 | -0,16 | 0,732044571 | 0,25  | 0,660920525 | 0,27  | 0,639359737 | -0,01 | 0,992890723 |
| Smim17    | 0,65  | 0,326862574 | 0,24  | 0,83456599  | -0,76 | 0,397387245 | -0,14 | 0,860740562 | -0,08 | 0,950211199 |
| Smim18    | 0,09  | 0,898116888 | 0     | 1           | 0,05  | 0,950846671 | 0,25  | 0,739921734 | 0,01  | 0,991291007 |
| Smim19    | 0,13  | 0,845909731 | 0,19  | 0,818644275 | 0,52  | 0,382313857 | -0,34 | 0,389492505 | -0,14 | 0,841160223 |
| Smim20    | -0,16 | 0,782369077 | -0,04 | 0,943915456 | -0,65 | 0,329372899 | -0,35 | 0,67600396  | 0,3   | 0,806250058 |
| Smim22    | -0,02 | 0,984124693 | 0,54  | 0,311963583 | 0,76  | 0,15883036  | -1,25 | 0,068704034 | -0,48 | 0,676132909 |
| Smim23    | 0,31  | 0,520667704 | 0,07  | 0,927496936 | -0,34 | 0,628978443 | 0,19  | 0,784479261 | 0,38  | 0,675958562 |
| Smim24    | -0,38 | 0,669220209 | 0,43  | 0,765325717 | -0,41 | 0,804976263 | -0,14 | 0,956643998 | -1,32 | 0,335679372 |
| Smim3     | -0,11 | 0,909325137 | 0,25  | 0,712500402 | -0,39 | 0,688179013 | 0,1   | 0,826256636 | 0,19  | 0,830788023 |
| Smim4     | -0,18 | 0,678045641 | -0,28 | 0,574343122 | 0,69  | 0,174478394 | 0,26  | 0,661554419 | -0,08 | 0,940485831 |
| Smim5     | 0,07  | 0,937129467 | -0,14 | 0,870989562 | -0,04 | 0,964493666 | -0,03 | 0,961864701 | -0,16 | 0,828288883 |
| Smim6     | 0,12  | 0,805313174 | -0,24 | 0,763299388 | 0,4   | 0,559861779 | -0,26 | 0,819224783 | -0,65 | 0,277658079 |
| Smim7     | 0,19  | 0,753797047 | -0,25 | 0,811280211 | -0,21 | 0,786553108 | -0,54 | 0,298021209 | -0,07 | 0,943503816 |
| Smim8     | -0,27 | 0,62243038  | -0,45 | 0,483436169 | 0,67  | 0,293036801 | -0,47 | 0,18591252  | -0,55 | 0,378967925 |
| Smim9     | 0,23  | 0,582214344 | 0,11  | 0,800504497 | -0,08 | 0,90569262  | -1,12 | 0,178451816 | 1,54  | 0,060986193 |
| Smkr-ps   | 0,03  | 0,976574175 | -0,26 | 0,708684603 | 0,06  | 0,945645382 | 0,34  | 0,575297022 | -0,05 | 0,969994712 |
| Smlr1     | 0,09  | 0,869565514 | 0,25  | 0,515486999 | -0,21 | 0,679406979 | 0,07  | 0,874701048 | 0,34  | 0,545166604 |
| Smn1      | -0,17 | 0,841134954 | -0,5  | 0,420570519 | 0,78  | 0,208429769 | 0,89  | 0,110461589 | 0,03  | 0,979456872 |
| Smndc1    | 0,59  | 0,180356049 | 0,16  | 0,843162191 | -0,23 | 0,80874731  | 0,5   | 0,606828076 | 0,57  | 0,536721752 |
| Smo       | -1,22 | 0,074890017 | -0,33 | 0,753256548 | 0,58  | 0,25964678  | 0,15  | 0,926704232 | -0,23 | 0,931666842 |
| Smoc1     | -0,07 | 0,93370499  | 0,04  | 0,956504634 | 0,66  | 0,324705558 | -1,07 | 0,100873888 | -0,27 | 0,889613878 |
| Smoc2     | -0,21 | 0,682512912 | 0,2   | 0,801609076 | 0,57  | 0,157817229 | 0,19  | 0,728291963 | -0,16 | 0,872943048 |



|         |       |             |       |             |       |             |       |             |       |             |
|---------|-------|-------------|-------|-------------|-------|-------------|-------|-------------|-------|-------------|
| Smok2a  | 0,09  | 0,922118639 | 0,28  | 0,797264005 | -0,06 | 0,955984004 | 0,23  | 0,467580023 | 0,7   | 0,108473626 |
| Smok2b  | 0,01  | 0,996219097 | -0,01 | 0,994802028 | 0,53  | 0,264885341 | -0,17 | 0,807985473 | -0,08 | 0,935808074 |
| Smok3a  | 0,26  | 0,74140155  | 0     | 1           | -0,44 | 0,532815251 | -0,21 | 0,691147947 | -0,33 | 0,75103789  |
| Smok4a  | 0,28  | 0,762165257 | -0,1  | 0,958856577 | 0,18  | 0,816183028 | 0,23  | 0,669457175 | -0,15 | 0,827532593 |
| Smox    | 0,22  | 0,694982784 | 0,15  | 0,761404909 | 0,23  | 0,789802954 | 0,86  | 0,058339779 | -0,62 | 0,28097058  |
| Smpd1   | 0,24  | 0,613990129 | 0,18  | 0,763796207 | 0,21  | 0,868609956 | -0,27 | 0,857910103 | -0,04 | 0,984125319 |
| Smpd2   | -0,24 | 0,745514605 | 0,65  | 0,268436493 | -0,01 | 0,99407001  | -0,38 | 0,506743647 | -0,15 | 0,883738739 |
| Smpd3   | -0,12 | 0,816616632 | 0,4   | 0,582502577 | -0,54 | 0,26430961  | -0,72 | 0,141431248 | -0,45 | 0,32673984  |
| Smpd4   | -0,46 | 0,535163117 | -0,36 | 0,6547161   | -0,01 | 0,994838841 | 0,44  | 0,591139075 | -0,33 | 0,812974964 |
| Smpd5   | 0,22  | 0,814444163 | 0,58  | 0,582502577 | 0,22  | 0,852219946 | 0,45  | 0,221934349 | -0,17 | 0,903392446 |
| Smpdl3a | -0,18 | 0,797266879 | -0,23 | 0,813235994 | -0,25 | 0,746397133 | -2,95 | 0,006048812 | -0,39 | 0,463152696 |
| Smpdl3b | -0,92 | 0,136095053 | -0,43 | 0,565603216 | 0,72  | 0,335573822 | 1,77  | 0,011609447 | 0,94  | 0,318394434 |
| Smpx    | 0,29  | 0,687662951 | 0,68  | 0,586775333 | -0,02 | 0,991018097 | -0,09 | 0,854613369 | 0,25  | 0,764656525 |
| Smr2    | -0,15 | 0,848780666 | -0,14 | 0,791519472 | 0,07  | 0,947316802 | 0,23  | 0,774226984 | 0,17  | 0,865866242 |
| Smr3a   | -0,24 | 0,683531628 | 0,29  | 0,858860016 | -0,02 | 0,989772079 | -0,3  | 0,392579767 | 0,21  | 0,732769706 |
| Sms     | -0,28 | 0,721378796 | -0,31 | 0,766425161 | 1,42  | 0,116607178 | 0,77  | 0,284846147 | -0,09 | 0,965625726 |
| Smtn    | -0,17 | 0,749658322 | 0,02  | 0,974975867 | 0,18  | 0,803333635 | -0,01 | 0,988575767 | -0,77 | 0,223294439 |
| Smtnl1  | -0,03 | 0,964378908 | 0     | 1           | 0,05  | 0,967304745 | 0,11  | 0,76730825  | 0     | 0,997374433 |
| Smtnl2  | -0,3  | 0,768443935 | 0,41  | 0,742819088 | 0,35  | 0,402220741 | -0,39 | 0,477211575 | -0,52 | 0,490706572 |
| Smu1    | -0,27 | 0,575829311 | -0,01 | 0,985764487 | -0,18 | 0,79541037  | 0,03  | 0,961123444 | -0,05 | 0,954657649 |
| Smug1   | 0,09  | 0,937523375 | -0,06 | 0,973945454 | 0,11  | 0,901071918 | -0,14 | 0,925502922 | 0,12  | 0,925858284 |
| Smurf1  | 0,08  | 0,897747251 | 0,21  | 0,732847182 | -0,06 | 0,937566473 | 0,24  | 0,596432013 | 0,25  | 0,718299139 |
| Smurf2  | 0,1   | 0,855568066 | 0,14  | 0,815022365 | -0,33 | 0,598179126 | -0,21 | 0,506357609 | -0,26 | 0,636321646 |
| Smyd1   | 0,32  | 0,593540946 | 0,13  | 0,867265251 | -0,21 | 0,747767515 | 0,1   | 0,868278978 | 0,29  | 0,628127128 |
| Smyd2   | -0,64 | 0,16941683  | -1,06 | 0,084290601 | 0,26  | 0,705811313 | 1,01  | 0,052722715 | -0,39 | 0,639071244 |
| Smyd3   | -0,61 | 0,52372418  | 0,14  | 0,855607772 | 0,61  | 0,456286868 | -0,77 | 0,24216236  | 0,34  | 0,662029815 |
| Smyd4   | -0,26 | 0,778869381 | -0,56 | 0,61862994  | 0,65  | 0,598179126 | -0,21 | 0,817768517 | 0,27  | 0,760882698 |
| Smyd5   | -0,68 | 0,421378808 | -0,54 | 0,302028989 | 0,43  | 0,520548688 | 0,83  | 0,127302567 | -0,2  | 0,803022047 |
| Snai1   | -0,27 | 0,629017743 | -0,05 | 0,965090893 | 0,2   | 0,894018349 | 0,84  | 0,0864017   | -0,01 | 0,992694729 |
| Snai2   | -0,2  | 0,696026916 | 0,65  | 0,656204868 | 0,05  | 0,973732268 | -1,09 | 0,19937858  | 0,64  | 0,455755125 |
| Snai3   | 0,29  | 0,805313174 | -0,48 | 0,77148563  | -0,11 | 0,92145606  | -0,36 | 0,463497874 | -0,27 | 0,729027002 |
| Snap23  | -0,08 | 0,904491579 | 0,13  | 0,782048012 | 0,05  | 0,950198596 | 0,63  | 0,335755837 | 0,45  | 0,551972106 |
| Snap25  | 0,09  | 0,922118639 | -0,08 | 0,930536666 | -0,04 | 0,964851619 | -0,21 | 0,716752012 | 0,06  | 0,952462776 |
| Snap29  | -0,08 | 0,948416223 | 0,17  | 0,855632384 | -0,4  | 0,475629395 | 0,23  | 0,680255321 | 0,78  | 0,149359319 |
| Snap47  | 0,11  | 0,886680488 | -0,09 | 0,954107225 | -0,11 | 0,901816517 | -0,18 | 0,798007688 | -0,53 | 0,345224141 |

|          |       |             |       |             |       |             |       |             |       |             |
|----------|-------|-------------|-------|-------------|-------|-------------|-------|-------------|-------|-------------|
| Snap91   | -0,01 | 0,993728727 | 0,04  | 0,966078321 | -0,06 | 0,952366216 | 0,18  | 0,864379203 | 0,07  | 0,965348932 |
| Snapc1   | -0,09 | 0,869225685 | 0,04  | 0,958545812 | -0,2  | 0,791940256 | 0,6   | 0,621027448 | 0,43  | 0,74324214  |
| Snapc2   | -0,07 | 0,934190386 | -0,15 | 0,788887515 | 0,74  | 0,377997279 | 0,23  | 0,480936901 | -0,28 | 0,665652108 |
| Snapc3   | -0,05 | 0,954304516 | 0,01  | 0,993068441 | -0,33 | 0,603802059 | -0,14 | 0,858632076 | 0,17  | 0,862867603 |
| Snapc4   | -0,24 | 0,788179942 | -0,81 | 0,323278688 | 0,25  | 0,837156771 | 0,3   | 0,330687975 | -0,09 | 0,916173996 |
| Snapc5   | -0,14 | 0,847613888 | -0,01 | 0,997171078 | -0,11 | 0,889165423 | -0,4  | 0,461501892 | -0,72 | 0,310964033 |
| Snapin   | -0,02 | 0,983807636 | -0,53 | 0,676549611 | -0,41 | 0,584320897 | -0,79 | 0,469017496 | -0,42 | 0,718869886 |
| Snca     | 0,15  | 0,856984761 | -0,12 | 0,904671921 | 0,35  | 0,722149463 | -0,28 | 0,597350222 | 0,02  | 0,984632256 |
| Snciaip  | 0,17  | 0,866900494 | -0,04 | 0,932338539 | 0,48  | 0,49392407  | 0,84  | 0,058392678 | -0,81 | 0,096212283 |
| Sncb     | 0,04  | 0,964086001 | -0,12 | 0,863064855 | -0,23 | 0,744387748 | 0,1   | 0,886422917 | -0,19 | 0,832736649 |
| Sncg     | -0,64 | 0,427151602 | -0,68 | 0,24128832  | -0,02 | 0,991018097 | -1,79 | 0,009316702 | -0,64 | 0,219210988 |
| Snd1     | 0,18  | 0,787919497 | -0,1  | 0,89034555  | -0,05 | 0,963115643 | 1,05  | 0,02414517  | -0,07 | 0,941241684 |
| Sned1    | -0,6  | 0,465168175 | -0,04 | 0,955204677 | 0,08  | 0,929871006 | -2,14 | 0,016045674 | -0,46 | 0,496305418 |
| Snf8     | -0,01 | 0,991919022 | -0,28 | 0,555848445 | 0,26  | 0,705811313 | 0,21  | 0,561974365 | 0,01  | 0,991291007 |
| Snhg1    | 0,13  | 0,814444163 | 0,44  | 0,561035617 | -0,11 | 0,922318683 | 0,04  | 0,959566803 | 0,93  | 0,097493626 |
| Snhg10   | 0,05  | 0,948087131 | -0,11 | 0,912773944 | -0,34 | 0,570233796 | -0,33 | 0,758905782 | -0,13 | 0,933741854 |
| Snhg11   | 0,07  | 0,904043614 | 0,21  | 0,670902144 | -0,17 | 0,82104737  | -0,25 | 0,646409335 | 0,01  | 0,992607235 |
| Snhg12   | 0,33  | 0,455714377 | 0,58  | 0,202192099 | -0,68 | 0,161469949 | 0,2   | 0,742706747 | 0,91  | 0,105052563 |
| Snhg14   | -0,1  | 0,90742841  | -0,2  | 0,700021821 | 0,37  | 0,641764537 | 0,1   | 0,843100118 | -0,14 | 0,853107295 |
| Snhg17   | -0,1  | 0,928131268 | -0,34 | 0,812432185 | -0,14 | 0,87140695  | 0,18  | 0,73719503  | 0,51  | 0,510632557 |
| Snhg18   | -0,27 | 0,636840455 | 0     | 1           | -0,19 | 0,817780561 | -1,11 | 0,076667325 | -0,38 | 0,726563756 |
| Snhg20   | -0,41 | 0,600313897 | -0,52 | 0,274811602 | -0,02 | 0,981848891 | -0,44 | 0,552830351 | 0,59  | 0,479698242 |
| Snhg3    | -0,14 | 0,71740976  | -0,4  | 0,380496707 | 0,31  | 0,635864143 | 0,03  | 0,953384713 | 0,3   | 0,574017037 |
| Snhg4    | -0,04 | 0,954914776 | -0,19 | 0,808168923 | 0,64  | 0,337509636 | 0,66  | 0,080902113 | 0,23  | 0,665933079 |
| Snhg5    | -0,13 | 0,820785667 | 0,09  | 0,930253753 | -0,49 | 0,392154535 | 0,67  | 0,371473963 | 0,88  | 0,268916528 |
| Snhg6    | 0,27  | 0,488619512 | 0,15  | 0,732847182 | 0,01  | 0,993379272 | 1,44  | 0,021644799 | 0,53  | 0,324093515 |
| Snhg7    | -0,54 | 0,322835282 | -0,01 | 0,995205602 | 0,63  | 0,307848353 | 0,68  | 0,139727753 | 0,47  | 0,471406593 |
| Snhg7os  | 0,19  | 0,805313174 | -0,11 | 0,881339866 | -0,11 | 0,932866273 | -0,01 | 0,996363405 | 0,49  | 0,395115041 |
| Snhg8    | 0,54  | 0,244478509 | 0,56  | 0,30005675  | -0,54 | 0,460914763 | -0,48 | 0,420641293 | 0,63  | 0,381486385 |
| Snhg9    | 0,29  | 0,472392979 | 0,11  | 0,823246376 | -0,21 | 0,705811313 | -0,57 | 0,291551173 | 0,14  | 0,896355106 |
| Snip1    | -0,2  | 0,761364679 | -0,01 | 0,998513452 | 0,25  | 0,675674731 | 0,23  | 0,67813472  | 0,46  | 0,399015872 |
| Snn      | -0,56 | 0,363136841 | -0,43 | 0,434358293 | 0,41  | 0,569619692 | 0,88  | 0,080715911 | -0,02 | 0,989016067 |
| Snora15  | -0,02 | 0,976870178 | 0,18  | 0,762968641 | -0,58 | 0,139085854 | -0,09 | 0,807661309 | 0,11  | 0,890035729 |
| Snora16a | -0,16 | 0,794466203 | 0,8   | 0,514920042 | 0,66  | 0,287401098 | -0,42 | 0,227359898 | -0,13 | 0,863496792 |
| Snora20  | -0,23 | 0,596655034 | 0,59  | 0,7979679   | -0,32 | 0,856636502 | 0,08  | 0,921731995 | 0,53  | 0,48837696  |

|          |       |             |       |             |       |             |       |             |       |             |
|----------|-------|-------------|-------|-------------|-------|-------------|-------|-------------|-------|-------------|
| Snora21  | 0,02  | 0,972682121 | 0,45  | 0,631534856 | -0,22 | 0,650169259 | -0,33 | 0,737607953 | 0,1   | 0,94607157  |
| Snora23  | 0,32  | 0,739638841 | 0,18  | 0,807175471 | 0,04  | 0,983759267 | 0,04  | 0,975687196 | 0,09  | 0,952971656 |
| Snora2b  | 0,36  | 0,597601402 | 0,14  | 0,838339231 | 0,4   | 0,641381759 | 0,14  | 0,868267109 | -0,12 | 0,904211485 |
| Snora3   | 0,43  | 0,355779967 | 0,68  | 0,25093395  | 0,24  | 0,801180503 | -0,22 | 0,612909689 | 0,59  | 0,244965154 |
| Snora30  | -0,36 | 0,839375532 | 1,63  | 0,143690114 | 0,59  | 0,674253263 | -2,08 | 0,064421632 | 0,67  | 0,513982313 |
| Snora31  | 0,28  | 0,518400371 | 0,79  | 0,438549879 | -1,03 | 0,13195567  | -1,51 | 0,127114154 | 0,41  | 0,735152891 |
| Snora33  | -0,01 | 0,996998625 | 0,23  | 0,750273889 | -0,62 | 0,283892438 | 0,22  | 0,831536593 | 0,85  | 0,336199299 |
| Snora35  | -0,06 | 0,904043614 | 0,05  | 0,923044405 | -0,12 | 0,840187016 | -0,03 | 0,942121869 | 0,14  | 0,836630434 |
| Snora36b | 0,07  | 0,9231839   | 0,08  | 0,946599376 | 0,22  | 0,782805427 | 0,08  | 0,8914104   | 0,09  | 0,912890826 |
| Snora41  | 0,25  | 0,641357042 | 0,08  | 0,854999866 | -0,01 | 0,993379272 | 0,1   | 0,887977289 | 0,51  | 0,554975763 |
| Snora44  | 0,18  | 0,774822327 | 0,38  | 0,638366221 | -0,56 | 0,66424919  | -0,83 | 0,108570937 | 0,45  | 0,581626555 |
| Snora47  | 0,11  | 0,876405309 | 0,22  | 0,643955364 | -0,18 | 0,78534601  | -0,31 | 0,437866509 | 0,3   | 0,590339443 |
| Snora52  | 0,14  | 0,943576038 | -0,62 | 0,586721336 | -0,66 | 0,399351769 | 0,79  | 0,598880673 | 0,25  | 0,926374705 |
| Snora5c  | -0,04 | 0,962810563 | 0,11  | 0,910060517 | -0,1  | 0,894018349 | -0,29 | 0,672109498 | -0,05 | 0,969994712 |
| Snora61  | 0,02  | 0,98456417  | 0,09  | 0,841592452 | 0,02  | 0,976092199 | 0,01  | 0,988205241 | 0,32  | 0,605816363 |
| Snora62  | 0,65  | 0,460231397 | -0,48 | 0,641792237 | -0,13 | 0,945886808 | -0,01 | 0,996287679 | -0,38 | 0,752420653 |
| Snora64  | -0,62 | 0,492530784 | -0,7  | 0,490650707 | -0,59 | 0,418405756 | 0,34  | 0,854971757 | 0,65  | 0,702993783 |
| Snora68  | -0,7  | 0,474479152 | -0,17 | 0,667422905 | -0,07 | 0,956570063 | 0,87  | 0,129629218 | 0,25  | 0,747828814 |
| Snora69  | -2    | 0,433469829 | 0     | 1           | 1,11  | 0,578720052 | 0,54  | 0,742706747 | 0,51  | 0,823098095 |
| Snora70  | -0,29 | 0,737256032 | 0,1   | 0,932292974 | -0,73 | 0,385844948 | 0,46  | 0,691869626 | 0,95  | 0,314909475 |
| Snora73a | -0,5  | 0,471686307 | -0,48 | 0,547271497 | 0,27  | 0,66225859  | 0,88  | 0,203580306 | 0,95  | 0,193796626 |
| Snora73b | -0,59 | 0,248395417 | -0,75 | 0,30567226  | 0,11  | 0,915321116 | 0,59  | 0,223134478 | 0,82  | 0,135418412 |
| Snora74a | -0,08 | 0,928103232 | 0,53  | 0,495031183 | -0,49 | 0,747599709 | -0,18 | 0,794100987 | -0,23 | 0,770282628 |
| Snora75  | -0,83 | 0,256112056 | -0,21 | 0,863347936 | -0,88 | 0,272483397 | -0,64 | 0,716994919 | -1,03 | 0,512028199 |
| Snora78  | -0,12 | 0,818587047 | 0,21  | 0,862430716 | -0,69 | 0,456595062 | -0,88 | 0,328768596 | -0,21 | 0,870978345 |
| Snora7a  | -0,25 | 0,800851935 | -0,32 | 0,724572503 | 0,54  | 0,631855861 | 1,47  | 0,134275521 | 0,59  | 0,570167801 |
| Snora81  | -1,36 | 0,083335073 | 1,1   | 0,104457339 | 0,3   | 0,888677583 | -0,31 | 0,51992597  | 0,91  | 0,635612479 |
| Snord100 | -0,04 | 0,955836484 | 0,46  | 0,455170487 | -0,02 | 0,983439952 | -0,41 | 0,327808042 | 0,33  | 0,600537288 |
| Snord104 | 0,17  | 0,761212734 | 0,32  | 0,703291096 | -0,76 | 0,271950186 | -0,58 | 0,512613133 | 0,85  | 0,266832581 |
| Snord11  | 0,28  | 0,663318436 | 0,75  | 0,495197335 | -0,32 | 0,591404136 | -0,43 | 0,63252606  | -0,2  | 0,890957032 |
| Snord110 | 0,69  | 0,484960336 | -0,13 | 0,895950162 | -0,06 | 0,963221639 | -1    | 0,530193027 | -0,75 | 0,655546511 |
| Snord111 | 0,41  | 0,834672627 | -0,23 | 0,912535732 | -0,07 | 0,967767582 | 0,83  | 0,250038016 | 0,52  | 0,698858628 |
| Snord118 | 0,63  | 0,371473145 | 0,67  | 0,340148488 | -0,33 | 0,733423502 | -0,79 | 0,285621337 | 0,61  | 0,573106355 |
| Snord12  | 0,77  | 0,625573018 | 0,06  | 0,985764487 | -0,79 | 0,425782502 | -0,17 | 0,935441511 | 1,34  | 0,3223162   |
| Snord123 | -0,03 | 0,963457823 | 0,01  | 0,99357702  | -0,1  | 0,896231565 | -0,26 | 0,506014175 | -0,17 | 0,906031862 |

|          |       |             |       |             |       |             |       |             |       |             |
|----------|-------|-------------|-------|-------------|-------|-------------|-------|-------------|-------|-------------|
| Snord14e | 0,17  | 0,780861943 | 0,61  | 0,291965439 | -0,76 | 0,241662423 | -2,04 | 0,01465719  | 0,35  | 0,599822901 |
| Snord15a | -0,39 | 0,834200067 | 0,26  | 0,906234611 | -0,1  | 0,972669335 | 0,78  | 0,329004867 | 0,37  | 0,467165141 |
| Snord15b | -1,77 | 0,251832801 | -0,03 | 0,989843833 | -0,36 | 0,760721308 | 0,14  | 0,911023213 | -0,16 | 0,97425848  |
| Snord16a | -0,36 | 0,455714377 | -0,16 | 0,821227978 | -0,09 | 0,934890696 | 2,46  | 0,194460147 | 1,26  | 0,538495665 |
| Snord17  | 0,39  | 0,670741124 | 0,57  | 0,655302559 | -0,09 | 0,959650277 | -0,94 | 0,0456902   | 0,09  | 0,920748161 |
| Snord1b  | 0,08  | 0,890974575 | 0,14  | 0,717074519 | -0,27 | 0,837806957 | -0,14 | 0,69938772  | 0     | 0,998704075 |
| Snord2   | 0,34  | 0,764288636 | 0,25  | 0,64119235  | -0,15 | 0,896467636 | -0,58 | 0,384391033 | 0,45  | 0,543925432 |
| Snord23  | 0,05  | 0,943751509 | 0,21  | 0,682024272 | -0,34 | 0,578390661 | 0,2   | 0,646776742 | 0,09  | 0,914176188 |
| Snord33  | -0,84 | 0,411594676 | 0,07  | 0,958187617 | 0,11  | 0,956650841 | -0,58 | 0,296127415 | 0,33  | 0,829280005 |
| Snord35a | 0,14  | 0,869565514 | 0,05  | 0,962138182 | 0,67  | 0,616924301 | 0,24  | 0,830129736 | 0,1   | 0,94989088  |
| Snord35b | -0,3  | 0,657051035 | 0,66  | 0,608466494 | -1,05 | 0,053837762 | -0,41 | 0,806984706 | -0,43 | 0,822398711 |
| Snord37  | 0,27  | 0,830575431 | 0,17  | 0,917642287 | 1,18  | 0,294906717 | 0,06  | 0,953222061 | 0,48  | 0,85508146  |
| Snord38a | 0,16  | 0,908658974 | -0,5  | 0,563666333 | -0,8  | 0,179552168 | 1,53  | 0,210730036 | 1,04  | 0,434347686 |
| Snord42a | -0,13 | 0,923450219 | 0,82  | 0,223066162 | -0,45 | 0,740600774 | -0,12 | 0,884326814 | 0,63  | 0,612321677 |
| Snord42b | 0,53  | 0,291011995 | 0,13  | 0,863823062 | 0,24  | 0,906301115 | -0,32 | 0,586174926 | -0,59 | 0,48229889  |
| Snord43  | -0,49 | 0,50667946  | 0,62  | 0,406817158 | -0,21 | 0,757251687 | 0,46  | 0,426488138 | 0,22  | 0,839474287 |
| Snord47  | 0,4   | 0,520545783 | 0,72  | 0,35466662  | -0,62 | 0,427338848 | -0,73 | 0,511044878 | 0,72  | 0,58512161  |
| Snord49a | -0,09 | 0,943079514 | 0,49  | 0,801259805 | 0,21  | 0,897233315 | -0,03 | 0,976644651 | 1,07  | 0,426055761 |
| Snord49b | -0,32 | 0,692446087 | 0,58  | 0,29534854  | -0,14 | 0,910212299 | 0,04  | 0,923775458 | 0,54  | 0,268100359 |
| Snord4a  | -0,12 | 0,957233345 | -0,75 | 0,404968424 | 2,49  | 0,109754934 | 0,45  | 0,625954847 | -0,77 | 0,534755057 |
| Snord52  | 0,05  | 0,943538971 | -0,13 | 0,761929694 | 0,2   | 0,689700431 | 1,17  | 0,081778495 | 0,73  | 0,257285213 |
| Snord53  | 0,92  | 0,388432897 | -0,32 | 0,904698551 | -0,81 | 0,625568832 | -0,24 | 0,923775458 | -0,88 | 0,434997258 |
| Snord55  | -0,01 | 0,996219097 | 0,48  | 0,590722193 | 0,09  | 0,932706021 | -0,08 | 0,895221658 | 0,24  | 0,642493829 |
| Snord57  | -0,15 | 0,89546421  | 0,06  | 0,991507752 | 0,8   | 0,536616434 | -0,69 | 0,414123109 | -0,5  | 0,813308036 |
| Snord58b | 0,88  | 0,175498937 | 0,05  | 0,974580396 | -0,56 | 0,726725386 | 0,91  | 0,188497007 | 1,4   | 0,053570529 |
| Snord61  | -0,8  | 0,783200207 | 0,69  | 0,832686271 | -0,68 | 0,780601987 | -2,31 | 0,221259004 | 0,03  | 0,990091016 |
| Snord64  | 0,12  | 0,842292335 | 0,27  | 0,66913532  | -0,03 | 0,961293403 | -0,05 | 0,914931176 | 0,09  | 0,923951087 |
| Snord65  | 0,11  | 0,950837484 | 0,7   | 0,590819012 | -0,35 | 0,591286453 | -0,45 | 0,661219211 | 0,71  | 0,264122193 |
| Snord66  | -0,17 | 0,875803416 | -0,16 | 0,851085879 | -0,02 | 0,99129124  | 0,08  | 0,95961934  | 0,02  | 0,991291007 |
| Snord67  | -0,09 | 0,861049109 | 0,09  | 0,894563348 | 0,31  | 0,809498779 | 0,01  | 0,978709235 | 0,24  | 0,655956123 |
| Snord69  | -0,81 | 0,37023946  | 0,05  | 0,9860901   | 0,72  | 0,324893924 | 0,56  | 0,704328661 | 0,72  | 0,586214748 |
| Snord70  | -0,17 | 0,818485458 | 0,61  | 0,745921616 | -0,32 | 0,791845015 | 0,29  | 0,835573451 | 0,79  | 0,563077271 |
| Snord71  | -0,1  | 0,934675994 | 0,18  | 0,925078626 | -0,61 | 0,453323275 | -1,1  | 0,366832276 | -0,65 | 0,614805193 |
| Snord72  | -0,72 | 0,712932137 | 0,09  | 0,896322235 | -0,03 | 0,977934465 | 0,22  | 0,751985387 | 0,81  | 0,221049107 |
| Snord73a | -0,09 | 0,940081423 | 0,43  | 0,599021965 | -0,36 | 0,667037569 | 0,24  | 0,85457567  | 1,18  | 0,381486385 |

|          |       |             |       |             |       |             |       |             |       |             |
|----------|-------|-------------|-------|-------------|-------|-------------|-------|-------------|-------|-------------|
| Snord8   | 0,12  | 0,826083295 | 0,06  | 0,928134372 | -0,15 | 0,859779899 | 0,06  | 0,932315462 | 0,35  | 0,616321633 |
| Snord82  | -0,59 | 0,46799262  | 0,09  | 0,862024138 | -0,26 | 0,90345282  | -0,76 | 0,68047104  | 1,23  | 0,716979399 |
| Snord83b | 0,01  | 0,991125401 | 0,31  | 0,595287483 | -0,29 | 0,806044178 | 0,41  | 0,501004985 | 0,44  | 0,598276475 |
| Snord85  | -0,12 | 0,793209485 | -0,21 | 0,827331203 | -0,11 | 0,911860447 | 0,32  | 0,656559309 | -0,26 | 0,861056054 |
| Snord87  | 0,03  | 0,995075117 | 0,22  | 0,852461907 | 0,57  | 0,744612355 | 1,38  | 0,143383775 | 1,21  | 0,149867393 |
| Snord88a | -0,44 | 0,790694396 | -0,33 | 0,870974837 | -0,65 | 0,764364882 | 0,1   | 0,871925977 | 0,44  | 0,721825544 |
| Snord88c | 0,04  | 0,960597621 | -0,15 | 0,824853794 | 0,21  | 0,707662594 | 0,12  | 0,868743047 | 0,33  | 0,715879151 |
| Snord89  | -0,05 | 0,949874616 | 0,62  | 0,383504117 | -0,12 | 0,90555701  | -1,67 | 0,005986083 | -0,03 | 0,979456872 |
| Snord90  | 0,35  | 0,756091915 | -1,26 | 0,475024915 | -0,91 | 0,507095234 | 1,11  | 0,679648561 | 1,11  | 0,681924457 |
| Snord91a | -0,38 | 0,468111704 | 0,2   | 0,870974837 | -0,09 | 0,892905856 | 0,38  | 0,514350696 | 0,49  | 0,299914055 |
| Snord92  | -1,38 | 0,102058516 | 0,71  | 0,635735492 | 0,22  | 0,896728577 | 0,62  | 0,654016303 | 0,29  | 0,884676277 |
| Snord95  | -0,24 | 0,824340202 | 0,05  | 0,966717367 | 0,16  | 0,873457545 | 0,54  | 0,187709521 | 0,57  | 0,328817797 |
| Snord96a | 0,08  | 0,922591969 | 0,22  | 0,615311543 | 0     | 0,999002132 | 0,53  | 0,382991753 | 0,72  | 0,4665641   |
| Snord99  | -0,41 | 0,735860437 | 0,25  | 0,716668427 | -0,63 | 0,406359307 | 0,05  | 0,965915023 | 1,1   | 0,150310916 |
| Snph     | 0,24  | 0,816537086 | 0,22  | 0,707790154 | 0,03  | 0,984951555 | 0,29  | 0,539551389 | 0,33  | 0,561168046 |
| Snrk     | -0,18 | 0,678857468 | -0,07 | 0,871864119 | 0,04  | 0,964654526 | -0,67 | 0,135013585 | -0,81 | 0,150296522 |
| Snrnp200 | -0,62 | 0,116800904 | -0,14 | 0,782652703 | 0,23  | 0,599648113 | -0,14 | 0,704106328 | -0,14 | 0,830013971 |
| Snrnp25  | -0,04 | 0,954349573 | -0,28 | 0,588131423 | 0,85  | 0,26430961  | 0,77  | 0,206698166 | -0,44 | 0,534755057 |
| Snrnp27  | 0,04  | 0,944969851 | -0,06 | 0,894022563 | -0,11 | 0,854599398 | 0,16  | 0,612909689 | 0,28  | 0,668747774 |
| Snrnp35  | 0,4   | 0,401159049 | -0,29 | 0,631511605 | -0,3  | 0,702689055 | 0,5   | 0,18011302  | 0,22  | 0,730330131 |
| Snrnp40  | -0,21 | 0,806104221 | -0,5  | 0,398684036 | 0,38  | 0,569097406 | 0,51  | 0,170346048 | 0,01  | 0,991980521 |
| Snrnp48  | 0,43  | 0,364497258 | 0,33  | 0,524812666 | -0,25 | 0,808348219 | -0,26 | 0,596670571 | 0,28  | 0,666758661 |
| Snrnp70  | -0,08 | 0,913546177 | 0,1   | 0,90082829  | 0,12  | 0,887429895 | 0,08  | 0,885958674 | -0,21 | 0,803654898 |
| Snrpa1   | -0,02 | 0,983663467 | -0,34 | 0,569612894 | 0,42  | 0,355300312 | 1,42  | 0,02073291  | 0,39  | 0,414033358 |
| Snrpb    | -0,07 | 0,893137556 | -0,37 | 0,49599855  | -0,09 | 0,903366838 | 0,41  | 0,177569419 | 0,25  | 0,640213665 |
| Snrpb2   | -0,16 | 0,766575514 | -0,18 | 0,729172466 | 0,01  | 0,997268369 | 0,64  | 0,094538857 | 0,34  | 0,631479776 |
| Snrpc    | 0,21  | 0,68856731  | 0,03  | 0,971118451 | 0,06  | 0,956570063 | 0     | 0,998658463 | 0,17  | 0,801384636 |
| Snrpd1   | -0,11 | 0,908281692 | -0,52 | 0,245917773 | 0,51  | 0,49582632  | 1,31  | 0,085369647 | 0,47  | 0,506613075 |
| Snrpd2   | -0,26 | 0,624941638 | -0,37 | 0,35381781  | 0,68  | 0,101024489 | 0,77  | 0,065441734 | -0,24 | 0,698816716 |
| Snrpd3   | -0,21 | 0,642618049 | -0,38 | 0,373555617 | 0,72  | 0,258186783 | 0,51  | 0,173600687 | 0,04  | 0,960974478 |
| Snrpe    | -0,08 | 0,875046718 | -0,28 | 0,564387918 | 0,41  | 0,589451508 | 1,02  | 0,024477499 | -0,07 | 0,917030581 |
| Snrpf    | -0,64 | 0,241909582 | -0,3  | 0,460241239 | 0,25  | 0,714832472 | 0,85  | 0,035059836 | 0,37  | 0,526235238 |
| Snrpg    | -0,27 | 0,489008935 | -0,24 | 0,666450149 | 0,18  | 0,787455112 | 0,18  | 0,671348066 | -0,28 | 0,666026291 |
| Snta1    | -0,45 | 0,37023946  | -0,24 | 0,720177658 | -0,19 | 0,840824939 | -0,09 | 0,903739255 | -0,16 | 0,879075155 |
| Sntb1    | -0,18 | 0,813824216 | 0,36  | 0,697354745 | -0,35 | 0,70687778  | -3,17 | 0,044757829 | -0,81 | 0,559721978 |

|       |       |             |       |             |       |             |       |             |       |             |
|-------|-------|-------------|-------|-------------|-------|-------------|-------|-------------|-------|-------------|
| Sntb2 | 0,42  | 0,274586973 | 0,16  | 0,707071624 | -0,18 | 0,750826735 | 0,88  | 0,032929006 | 0,35  | 0,517887746 |
| Sntg1 | 0,36  | 0,664036618 | 0,25  | 0,839673299 | -0,05 | 0,956570063 | 0,03  | 0,966701307 | 0,27  | 0,665326953 |
| Sntg2 | -0,95 | 0,156998083 | -0,15 | 0,874835107 | -0,23 | 0,775478253 | -0,25 | 0,71158821  | -0,51 | 0,572917283 |
| Sntn  | 0,26  | 0,718996404 | 0,38  | 0,599783551 | -0,12 | 0,887429895 | -0,19 | 0,784270703 | 0,49  | 0,437487716 |
| Snupn | -0,56 | 0,556793286 | -0,06 | 0,973043968 | 0,45  | 0,506457255 | 0,3   | 0,841644929 | -0,04 | 0,982577187 |
| Snw1  | -0,05 | 0,942184897 | 0,13  | 0,824916914 | -0,05 | 0,963199274 | 0,07  | 0,924477001 | 0,16  | 0,849460116 |
| Snx1  | -0,22 | 0,659860831 | 0,01  | 0,998237793 | 0,14  | 0,813287877 | 0,03  | 0,963999463 | 0,06  | 0,952141995 |
| Snx10 | 0,78  | 0,341853862 | 0,72  | 0,293559172 | -0,68 | 0,406432856 | 0,99  | 0,053438615 | 1,69  | 0,004275249 |
| Snx11 | -0,48 | 0,579630863 | -0,03 | 0,949792535 | -0,54 | 0,570568062 | -0,16 | 0,831253708 | -0,07 | 0,951429597 |
| Snx12 | -0,34 | 0,631219977 | 0,55  | 0,49125334  | -0,07 | 0,946810097 | -0,6  | 0,244769083 | 0,09  | 0,935812103 |
| Snx13 | -0,56 | 0,474293292 | 0,15  | 0,845852338 | 0,03  | 0,976042637 | 0,47  | 0,623819945 | 0,32  | 0,794001669 |
| Snx14 | -0,04 | 0,976574175 | 0,16  | 0,867516325 | 0,45  | 0,671680785 | -0,62 | 0,140579662 | -0,64 | 0,287590871 |
| Snx15 | 0,06  | 0,92366013  | 0,18  | 0,761404909 | 0,29  | 0,637321546 | 0,44  | 0,374915325 | 0,49  | 0,488240178 |
| Snx16 | 0,41  | 0,510737023 | 0,51  | 0,655693341 | -0,12 | 0,926046487 | -0,49 | 0,645842474 | 0,63  | 0,46173543  |
| Snx17 | -0,26 | 0,637315473 | -0,48 | 0,277253387 | 0,58  | 0,283560455 | 0,46  | 0,291280701 | 0,21  | 0,773401088 |
| Snx18 | -0,23 | 0,587011701 | -0,22 | 0,666450149 | 0,3   | 0,669894613 | -1,08 | 0,040875837 | -0,23 | 0,745574572 |
| Snx19 | -0,03 | 0,963036332 | 0,06  | 0,958545812 | -0,54 | 0,260131517 | -1,7  | 0,010692197 | -0,83 | 0,069195544 |
| Snx2  | 0,55  | 0,299137084 | 0,36  | 0,494161701 | -0,46 | 0,469544898 | 0,51  | 0,170020969 | 0,04  | 0,966951657 |
| Snx20 | 0,22  | 0,795424954 | 0,13  | 0,812432185 | -0,04 | 0,978012085 | 0,64  | 0,10670439  | 0,32  | 0,755576335 |
| Snx21 | -0,35 | 0,575127945 | -0,53 | 0,313668241 | -0,3  | 0,786701319 | -0,05 | 0,900618083 | -0,1  | 0,89162919  |
| Snx22 | -0,09 | 0,919758492 | -0,24 | 0,764491894 | -0,11 | 0,921119153 | 0,2   | 0,661916932 | 0,03  | 0,976186017 |
| Snx24 | 1,11  | 0,282853913 | 1,26  | 0,175892375 | -0,99 | 0,309053396 | 2     | 0,007738248 | 0,54  | 0,421255613 |
| Snx25 | -0,5  | 0,437188558 | 0,31  | 0,538124718 | -0,17 | 0,862202772 | 0,95  | 0,30435522  | 0,45  | 0,723262402 |
| Snx27 | -0,13 | 0,893283341 | 0,03  | 0,983363427 | 0,85  | 0,18363414  | -0,14 | 0,916072825 | 0,21  | 0,881613493 |
| Snx29 | -0,42 | 0,277154156 | 0,04  | 0,969296652 | 0,48  | 0,622546805 | -0,47 | 0,444856128 | -0,17 | 0,868032772 |
| Snx3  | -0,48 | 0,272814314 | -0,17 | 0,823530278 | 0,32  | 0,474479799 | 0,11  | 0,784373652 | 0,03  | 0,967522546 |
| Snx30 | -0,87 | 0,642618049 | 0,53  | 0,591241501 | -0,35 | 0,840308671 | -0,67 | 0,355548781 | -0,71 | 0,537706015 |
| Snx31 | 0,2   | 0,808572184 | -0,06 | 0,968235275 | -0,22 | 0,713620433 | -0,07 | 0,932312961 | 0,01  | 0,992607235 |
| Snx32 | 0,02  | 0,991919022 | -0,58 | 0,408026646 | -0,19 | 0,886433055 | -0,29 | 0,762935413 | 0,4   | 0,707344637 |
| Snx33 | -0,14 | 0,834473269 | 0,24  | 0,698886888 | 0,25  | 0,804607903 | -0,79 | 0,19275315  | 0,1   | 0,905581898 |
| Snx4  | -0,59 | 0,464460918 | 0,02  | 0,994161588 | 0,39  | 0,451450652 | 0,54  | 0,314467607 | -0,08 | 0,934242963 |
| Snx5  | 0     | 0,997888714 | 0,29  | 0,493482658 | 0,02  | 0,987007223 | 0,35  | 0,42749877  | 0,42  | 0,456327568 |
| Snx6  | 0,42  | 0,327594687 | 0,43  | 0,261996361 | 0,14  | 0,856923247 | 1,06  | 0,047695121 | 0,47  | 0,400708488 |
| Snx7  | -0,23 | 0,505856084 | -0,04 | 0,956049982 | 0,14  | 0,867571963 | 0,85  | 0,041009258 | 0     | 0,998664337 |
| Snx8  | -0,2  | 0,717502566 | -0,34 | 0,761267765 | -0,53 | 0,569485613 | 0,09  | 0,928065995 | 0,08  | 0,937558003 |

|          |       |             |       |             |       |             |       |             |       |             |
|----------|-------|-------------|-------|-------------|-------|-------------|-------|-------------|-------|-------------|
| Snx9     | 0,07  | 0,883130741 | 0,36  | 0,365822265 | 0,12  | 0,904844142 | 0,32  | 0,408140825 | 0,63  | 0,186454486 |
| Soat1    | -0,45 | 0,241021853 | -0,4  | 0,429168189 | 0,73  | 0,085429661 | 0,99  | 0,072914823 | -0,35 | 0,61355523  |
| Soat2    | 0,2   | 0,889252203 | 0,42  | 0,62131397  | -0,55 | 0,544756897 | 1,08  | 0,08358638  | 0,55  | 0,431894609 |
| Sobp     | -0,07 | 0,925315048 | -0,13 | 0,89081665  | -0,16 | 0,760030911 | -0,54 | 0,259200755 | -0,17 | 0,821517568 |
| Socs1    | 2,04  | 0,021908222 | 1,3   | 0,104457339 | -1,47 | 0,002848711 | -0,47 | 0,228384791 | 1,42  | 0,015349051 |
| Socs2    | 0,36  | 0,532965036 | 0,16  | 0,700297886 | 0,14  | 0,884861819 | 0,22  | 0,504625503 | 0,35  | 0,606147711 |
| Socs3    | 0,79  | 0,13473547  | 0,71  | 0,271145766 | -0,53 | 0,27037497  | -0,4  | 0,348565724 | 0,15  | 0,834671019 |
| Socs4    | 0,22  | 0,734646609 | 0,12  | 0,880473303 | 0,06  | 0,953484852 | -0,01 | 0,994512187 | 0,23  | 0,727066601 |
| Socs5    | -0,27 | 0,651732317 | 0,2   | 0,654621987 | 1     | 0,290996536 | -0,52 | 0,389411111 | 0,26  | 0,735052158 |
| Socs6    | 0,09  | 0,94914647  | 0,49  | 0,75824583  | 0,59  | 0,277909635 | 0,14  | 0,904971257 | 0,99  | 0,205234814 |
| Socs7    | 0,2   | 0,852198853 | 0,13  | 0,817110093 | -0,19 | 0,736203613 | 0,24  | 0,653400029 | 0,4   | 0,635195583 |
| Sod1     | -0,12 | 0,776877258 | -0,21 | 0,586557931 | 0,11  | 0,882540073 | -0,17 | 0,58838089  | -0,1  | 0,877257205 |
| Sod2     | 0,7   | 0,110762724 | 0,82  | 0,116597686 | -0,42 | 0,391323462 | -0,05 | 0,944800115 | 0,75  | 0,183207911 |
| Sod3     | -0,34 | 0,675149694 | 0,23  | 0,596449666 | 0,02  | 0,993379272 | -0,26 | 0,658011013 | -0,13 | 0,942649328 |
| Soga1    | -0,06 | 0,95290436  | -0,26 | 0,800591362 | 0,16  | 0,80546411  | 0,6   | 0,119967954 | -0,32 | 0,592394512 |
| Soga3    | -0,05 | 0,970938013 | 0,38  | 0,661734303 | 0,76  | 0,264273523 | -0,68 | 0,203657513 | -0,26 | 0,723698105 |
| Sohlh1   | 0,58  | 0,185926518 | 0,1   | 0,928134372 | -0,19 | 0,816883729 | 0,14  | 0,823146103 | 0,16  | 0,825272094 |
| Sohlh2   | 0,09  | 0,852363306 | 0,1   | 0,843493142 | -0,05 | 0,959437564 | -0,21 | 0,799669326 | 0,19  | 0,82517732  |
| Son      | 0,27  | 0,617280733 | -0,1  | 0,818889977 | -0,3  | 0,543696688 | 0,41  | 0,328105019 | 0,53  | 0,306747854 |
| Sorbs1   | -0,9  | 0,305623485 | -0,41 | 0,575306502 | 0,17  | 0,8768401   | -0,95 | 0,092370756 | -0,7  | 0,232692564 |
| Sorbs2   | -0,14 | 0,902628825 | -0,53 | 0,296841418 | -0,13 | 0,909963525 | 0,5   | 0,370292046 | 0,33  | 0,659694081 |
| Sorbs2os | 0,18  | 0,752042687 | -0,08 | 0,883631611 | 0,14  | 0,831266864 | 0,11  | 0,778817721 | 0,22  | 0,708898543 |
| Sorbs3   | -0,49 | 0,447068257 | -0,27 | 0,615311543 | -0,06 | 0,953622038 | -2,51 | 0,013089317 | -1,01 | 0,214123599 |
| Sorcs1   | 0,03  | 0,98600909  | 0,04  | 0,977324409 | 0,37  | 0,776071062 | 0,32  | 0,701150944 | 0,51  | 0,496445233 |
| Sorcs2   | -0,51 | 0,421378808 | 0,54  | 0,78209856  | 1,08  | 0,15883036  | 0,76  | 0,448670175 | 0,69  | 0,488152382 |
| Sorcs3   | 0,08  | 0,942342146 | 0,32  | 0,664787536 | -0,42 | 0,523778151 | -0,49 | 0,376628904 | -0,19 | 0,845769651 |
| Sord     | 0,31  | 0,791150064 | -0,05 | 0,982466032 | -0,67 | 0,197507065 | -0,32 | 0,810891431 | 0,28  | 0,825966687 |
| Sorl1    | 0,23  | 0,777099028 | 0,16  | 0,700306103 | -0,36 | 0,503650142 | -0,51 | 0,582048768 | 0,04  | 0,981439632 |
| Sort1    | -0,16 | 0,874688734 | -0,46 | 0,446926355 | 0,25  | 0,70635953  | -3,58 | 0,00517713  | -1    | 0,127656125 |
| Sos1     | 0,06  | 0,914090929 | 0,02  | 0,989873399 | 0,36  | 0,510827216 | 0,17  | 0,703627304 | -0,05 | 0,954657649 |
| Sos2     | 0,07  | 0,929279372 | 0,63  | 0,15478032  | 0,03  | 0,978207511 | -1,11 | 0,018937125 | -0,25 | 0,66608849  |
| Sost     | 0,01  | 0,993728727 | 0,08  | 0,944460866 | 0,08  | 0,947316802 | -0,25 | 0,672487578 | -0,08 | 0,937446198 |
| Sostdc1  | -0,26 | 0,614250688 | -0,23 | 0,647475869 | -0,06 | 0,936840991 | 0,29  | 0,67240427  | -0,26 | 0,779630262 |
| Sowaha   | 0,14  | 0,813201941 | 0,14  | 0,817367084 | 0,13  | 0,842767638 | -0,22 | 0,676423843 | -0,38 | 0,498496176 |
| Sowahb   | -0,18 | 0,735304978 | -0,08 | 0,932390453 | -0,28 | 0,757980709 | 0,29  | 0,530930502 | -0,23 | 0,752420653 |

|         |       |             |       |             |       |             |       |             |       |             |
|---------|-------|-------------|-------|-------------|-------|-------------|-------|-------------|-------|-------------|
| Sowahc  | -0,09 | 0,888503049 | 0,05  | 0,917863429 | 0,12  | 0,864411302 | -0,36 | 0,585277734 | 0,24  | 0,814864454 |
| Sowahd  | 0,11  | 0,856118781 | -0,12 | 0,833656099 | -0,12 | 0,876687326 | 0,45  | 0,546441525 | 0,54  | 0,422263547 |
| Sox1    | -0,02 | 0,964210818 | 0,04  | 0,926210163 | -0,07 | 0,904057901 | -0,09 | 0,789082749 | -0,06 | 0,933759514 |
| Sox10   | 0,3   | 0,460585665 | 0,22  | 0,802788292 | -0,23 | 0,605980826 | -0,16 | 0,788101738 | 0,21  | 0,829834904 |
| Sox11   | 0,12  | 0,800851935 | 0,04  | 0,951374483 | -0,05 | 0,964792312 | 0,12  | 0,821045725 | 0,04  | 0,967522546 |
| Sox12   | -0,06 | 0,93113484  | -0,17 | 0,80192513  | -0,19 | 0,906007019 | -0,01 | 0,991453278 | -0,09 | 0,909363599 |
| Sox13   | -0,04 | 0,95290436  | -0,21 | 0,581931436 | -0,36 | 0,385710224 | -0,48 | 0,220875656 | -0,27 | 0,638780444 |
| Sox14   | 0,2   | 0,673291416 | -0,06 | 0,956670485 | -0,55 | 0,452489311 | 0,3   | 0,534171194 | -0,05 | 0,958259949 |
| Sox15   | -0,28 | 0,56461489  | -0,17 | 0,690383756 | -0,02 | 0,977827235 | 0,2   | 0,610149813 | -0,35 | 0,541844974 |
| Sox17   | -0,44 | 0,356810943 | 0,11  | 0,904698551 | 0,24  | 0,665199188 | -1,49 | 0,042308687 | -0,65 | 0,311800369 |
| Sox18   | -0,76 | 0,106666298 | -0,5  | 0,275147283 | 0,04  | 0,958885013 | 0     | 1           | -0,47 | 0,432621109 |
| Sox2    | -0,22 | 0,760660571 | -0,14 | 0,925558044 | -0,18 | 0,830541787 | 0,29  | 0,692059018 | 0,35  | 0,535470748 |
| Sox21   | -0,01 | 0,991919022 | -0,14 | 0,800067055 | 0,3   | 0,651996539 | 0,03  | 0,965982652 | 0,31  | 0,654271552 |
| Sox2ot  | 0,11  | 0,928318035 | 0,17  | 0,912773944 | -0,38 | 0,544236372 | -0,41 | 0,666001651 | 0     | 0,997254437 |
| Sox3    | 0,07  | 0,913425276 | -0,01 | 0,994137877 | 0,07  | 0,919116989 | 0     | 0,994512187 | -0,03 | 0,977236465 |
| Sox30   | -0,08 | 0,916792859 | 0,22  | 0,753679288 | 0,12  | 0,891011584 | 0,06  | 0,898690469 | -0,18 | 0,825680274 |
| Sox4    | -0,04 | 0,948087131 | -0,28 | 0,732529148 | 0,07  | 0,937538924 | 2,06  | 0,014715419 | -0,12 | 0,912250982 |
| Sox5    | -0,29 | 0,647258858 | -0,51 | 0,242593184 | 0     | 0,999931921 | -1,14 | 0,069351821 | -0,04 | 0,978604922 |
| Sox5it  | 0,15  | 0,736503749 | -0,09 | 0,879407921 | -0,25 | 0,603819103 | 0,05  | 0,91118635  | 0,08  | 0,932590263 |
| Sox5os1 | 0,01  | 0,984040323 | -0,05 | 0,926760642 | 0,03  | 0,973186233 | 0,01  | 0,981203009 | 0,02  | 0,979456872 |
| Sox5os3 | 0,04  | 0,962012205 | 0,23  | 0,609632892 | -0,12 | 0,892905856 | -0,41 | 0,495340036 | 0,06  | 0,956236782 |
| Sox6    | -0,01 | 0,993728727 | -0,17 | 0,852719676 | -0,48 | 0,465949919 | -3,17 | 0,008006726 | -0,43 | 0,495345787 |
| Sox6os  | -0,2  | 0,732251435 | -0,06 | 0,958856577 | 0,25  | 0,715689361 | -0,88 | 0,270661824 | -0,4  | 0,697336851 |
| Sox7    | -0,45 | 0,277692472 | 0,12  | 0,813541606 | -0,13 | 0,825174342 | 0,63  | 0,0863352   | 0,11  | 0,865258929 |
| Sox8    | -0,12 | 0,816465857 | 0,03  | 0,983028198 | 0,01  | 0,993379272 | 0,22  | 0,677756558 | -0,23 | 0,864166878 |
| Sox9    | 0,05  | 0,9231839   | 0,08  | 0,880892852 | 0,84  | 0,17564176  | -0,53 | 0,25487338  | -0,22 | 0,723883531 |
| Sp1     | 0,2   | 0,771793584 | -0,02 | 0,982053677 | -0,28 | 0,705811313 | -0,55 | 0,214912434 | -0,26 | 0,726042963 |
| Sp100   | 0,59  | 0,20942884  | 0,52  | 0,210141501 | -0,96 | 0,135693106 | -0,8  | 0,04470267  | 0,47  | 0,325133129 |
| Sp140   | 2,45  | 0,30122822  | 2,7   | 0,077861305 | -2,04 | 0,095178556 | -0,61 | 0,585277734 | 2,49  | 0,016526131 |
| Sp2     | 0,14  | 0,803064624 | -0,05 | 0,9369583   | 0,02  | 0,990836784 | 0,16  | 0,696299377 | -0,14 | 0,877865585 |
| Sp3     | 0,15  | 0,723086689 | 0,17  | 0,828219939 | 0,13  | 0,85092959  | 0,02  | 0,978659719 | 0,36  | 0,697818445 |
| Sp3os   | 0,43  | 0,766575514 | -0,2  | 0,826814267 | 0,04  | 0,96858449  | 0,7   | 0,532234359 | 0,33  | 0,810027901 |
| Sp4     | 0,25  | 0,626864341 | 0,76  | 0,325242663 | -0,33 | 0,705327054 | -0,9  | 0,173600687 | 0,56  | 0,456619394 |
| Sp5     | -0,12 | 0,814888638 | 0,04  | 0,953631922 | 0,17  | 0,815951038 | -0,05 | 0,929835301 | -0,07 | 0,939448119 |
| Sp6     | 0,39  | 0,551572626 | -0,12 | 0,870989562 | -0,37 | 0,457766911 | 0,19  | 0,749554449 | 0,05  | 0,967788345 |



|          |       |             |       |             |       |             |       |             |       |             |
|----------|-------|-------------|-------|-------------|-------|-------------|-------|-------------|-------|-------------|
| Sp7      | 0,04  | 0,966889339 | 0     | 1           | -0,18 | 0,866421366 | 0,04  | 0,963498897 | -0,05 | 0,956610289 |
| Sp8      | -0,1  | 0,90814211  | -0,26 | 0,772558681 | -0,48 | 0,574360438 | -0,25 | 0,571326529 | 0,05  | 0,956822408 |
| Sp9      | 0,42  | 0,7348094   | -0,32 | 0,559617305 | -0,18 | 0,818550316 | 0,31  | 0,473552953 | 0,09  | 0,919979016 |
| Spa17    | -0,32 | 0,803737003 | -0,95 | 0,297321006 | 0,02  | 0,99416325  | 0,26  | 0,892186579 | 0,78  | 0,561876467 |
| Spaca1   | 0,08  | 0,919567534 | 0,55  | 0,715733316 | 0,09  | 0,911634383 | 0,13  | 0,870043183 | -0,13 | 0,884248437 |
| Spaca3   | 0,03  | 0,962810563 | -0,29 | 0,524932637 | 0,19  | 0,780601987 | -0,08 | 0,864379203 | -0,23 | 0,655956123 |
| Spaca4   | -0,01 | 0,991919022 | -0,12 | 0,863064855 | 0,27  | 0,700186861 | -0,03 | 0,9704566   | -0,12 | 0,907903208 |
| Spaca5   | -0,26 | 0,766541178 | -0,12 | 0,916255958 | 0,11  | 0,842767638 | -0,06 | 0,87811903  | 0,05  | 0,969928296 |
| Spaca6   | 0,04  | 0,972667767 | 0,49  | 0,457889449 | -0,08 | 0,973802765 | -0,96 | 0,113474695 | -0,05 | 0,961879805 |
| Spaca7   | 0,35  | 0,739833092 | -0,75 | 0,494704387 | 0,11  | 0,904516738 | 0,38  | 0,460670943 | -0,14 | 0,872665918 |
| Spag1    | -0,17 | 0,904633081 | -0,03 | 0,988550087 | -0,57 | 0,249821562 | -0,29 | 0,603550136 | -0,36 | 0,585118808 |
| Spag11a  | 0,53  | 0,388432897 | -0,04 | 0,95647337  | 0,2   | 0,720590502 | -0,06 | 0,916072825 | 0,17  | 0,794586838 |
| Spag11b  | 0,09  | 0,9174562   | 0,05  | 0,926210163 | -0,3  | 0,598313143 | -0,21 | 0,812468015 | -0,14 | 0,91314596  |
| Spag16   | 0,42  | 0,249614815 | 0,15  | 0,89081665  | -0,38 | 0,638965268 | 0,11  | 0,886806548 | 0,32  | 0,611234576 |
| Spag17   | 0,07  | 0,896036407 | 0,11  | 0,919602924 | -0,3  | 0,660920525 | -0,05 | 0,938689944 | 0,12  | 0,891228529 |
| Spag17os | -0,07 | 0,913921068 | 0,31  | 0,641804702 | 0,01  | 0,99394877  | -0,01 | 0,988205241 | 0,05  | 0,957130917 |
| Spag4    | -0,7  | 0,172698611 | -0,14 | 0,859954464 | 0,63  | 0,188127144 | 0,15  | 0,706619788 | -0,2  | 0,733190569 |
| Spag5    | -0,95 | 0,223116031 | -1,14 | 0,159075122 | 1,13  | 0,218714399 | 1,98  | 0,008757518 | -0,11 | 0,92519473  |
| Spag6    | 0,44  | 0,473832525 | 0,8   | 0,261054232 | 0,16  | 0,799949177 | -1,01 | 0,140538478 | -0,38 | 0,622342377 |
| Spag6l   | 0,09  | 0,91409989  | 0,27  | 0,627893736 | 0,09  | 0,940550094 | -0,33 | 0,609023716 | 0,38  | 0,633360146 |
| Spag7    | -0,27 | 0,433492052 | -0,04 | 0,975836193 | 0,58  | 0,458498879 | 0,22  | 0,518203237 | 0,07  | 0,930575749 |
| Spag8    | -0,18 | 0,725966386 | -0,19 | 0,792234642 | -0,3  | 0,548750983 | -0,08 | 0,926698477 | -0,17 | 0,876418697 |
| Spag9    | -0,1  | 0,897481914 | -0,05 | 0,966078321 | -0,18 | 0,797537534 | -0,04 | 0,938689944 | -0,19 | 0,765762541 |
| Spam1    | -0,09 | 0,847000357 | 0,08  | 0,937249855 | 0,04  | 0,958767792 | -0,04 | 0,972449766 | -0,09 | 0,929780699 |
| Spanxn4  | 0,07  | 0,909167171 | 0,19  | 0,758359259 | -0,05 | 0,938771378 | -0,08 | 0,823795118 | 0,11  | 0,860919132 |
| Sparc    | -0,24 | 0,531771765 | -0,17 | 0,684726882 | 0,14  | 0,823823322 | 0,85  | 0,044757829 | -0,49 | 0,290610657 |
| Sparcl1  | -0,3  | 0,438315603 | -0,07 | 0,867834749 | 0,31  | 0,60061447  | 0,84  | 0,044184887 | -0,71 | 0,106983116 |
| Spast    | 0,26  | 0,62085984  | -0,25 | 0,805620382 | 0,8   | 0,36356264  | 0,36  | 0,677270263 | 0,32  | 0,702993783 |
| Spata1   | 0,71  | 0,514055995 | 0,05  | 0,971118451 | 0,89  | 0,462123525 | -1,51 | 0,105677167 | -0,73 | 0,587735967 |
| Spata13  | -0,39 | 0,297096518 | 0,08  | 0,936792848 | -0,02 | 0,993071391 | 1,27  | 0,038935822 | 0     | 0,996625245 |
| Spata16  | 0,28  | 0,656095444 | 0,3   | 0,599495018 | 0,15  | 0,847564027 | -0,23 | 0,676359734 | -0,42 | 0,46391899  |
| Spata17  | -0,27 | 0,627254596 | 0,43  | 0,429168189 | 0,06  | 0,952104131 | -0,12 | 0,876895238 | -0,37 | 0,601753447 |
| Spata18  | 0,23  | 0,592777985 | 0,03  | 0,975959817 | -0,12 | 0,878636183 | 0,03  | 0,97063258  | -0,08 | 0,932268703 |
| Spata19  | 0,46  | 0,546026761 | 0,48  | 0,308187511 | -0,09 | 0,904132011 | -0,12 | 0,817887397 | 0,37  | 0,452989679 |
| Spata2   | -0,25 | 0,505785794 | 0,25  | 0,643743213 | -0,07 | 0,94930407  | -0,52 | 0,143543466 | -0,4  | 0,403887774 |

|            |       |             |       |             |       |             |       |             |       |             |
|------------|-------|-------------|-------|-------------|-------|-------------|-------|-------------|-------|-------------|
| Spata20    | 0,1   | 0,854588321 | -0,08 | 0,93451524  | -0,46 | 0,39993468  | 0,18  | 0,671576377 | 0,18  | 0,789358981 |
| Spata21    | 0,16  | 0,84900712  | -0,03 | 0,982137548 | -0,09 | 0,911894304 | 0,53  | 0,224380957 | 0,42  | 0,428613647 |
| Spata22    | -0,2  | 0,707197684 | -0,88 | 0,460241239 | -0,49 | 0,424394835 | 0,65  | 0,413780059 | 0,44  | 0,521691028 |
| Spata24    | -0,98 | 0,227036204 | -0,05 | 0,96497149  | 0,41  | 0,589859931 | 0,39  | 0,215039864 | -0,47 | 0,618748455 |
| Spata25    | 0,1   | 0,842504427 | 0,15  | 0,780374403 | -0,51 | 0,516728404 | -0,4  | 0,342603593 | 0,15  | 0,891925115 |
| Spata2l    | 0,5   | 0,470166881 | -0,08 | 0,952443691 | 0,03  | 0,973739008 | 0,08  | 0,924113945 | -0,28 | 0,831975531 |
| Spata3     | -0,56 | 0,213935959 | 0,6   | 0,345336822 | -0,36 | 0,530264141 | -0,26 | 0,797123056 | 0,15  | 0,899196564 |
| Spata31    | 0,27  | 0,473832525 | -0,15 | 0,876388374 | -0,16 | 0,855887253 | -0,05 | 0,939275881 | -0,19 | 0,851207222 |
| Spata31d1a | -0,53 | 0,242987368 | 0,04  | 0,969019461 | 0,02  | 0,976042637 | 0,52  | 0,205384534 | 0,34  | 0,622910734 |
| Spata31d1b | -0,53 | 0,575887113 | 0,09  | 0,924916733 | 0,69  | 0,278260113 | -0,39 | 0,428767536 | -0,05 | 0,976743304 |
| Spata31d1c | -0,15 | 0,858159992 | -0,66 | 0,468035796 | -0,32 | 0,596163134 | 0,33  | 0,760641895 | -0,07 | 0,960974478 |
| Spata31d1d | 0,13  | 0,822107047 | -0,16 | 0,922703368 | -0,15 | 0,910973975 | 0,15  | 0,902095386 | 0,18  | 0,902802615 |
| Spata32    | 0,1   | 0,940328252 | 0,09  | 0,974159037 | 0,01  | 0,994076654 | 0,06  | 0,979088341 | -0,09 | 0,97425848  |
| Spata33    | -0,32 | 0,701086418 | 0,33  | 0,664787536 | -0,02 | 0,979791644 | 0,05  | 0,975478082 | -0,44 | 0,655956123 |
| Spata4     | -0,14 | 0,762798673 | 0,01  | 0,996113371 | -0,03 | 0,974628464 | 0,02  | 0,971151107 | 0,16  | 0,812549515 |
| Spata45    | -0,05 | 0,950669622 | -0,07 | 0,92046066  | 0,03  | 0,977797071 | 0,3   | 0,710688722 | 0,22  | 0,825871709 |
| Spata5     | -0,22 | 0,818182081 | -0,16 | 0,884434898 | 0,01  | 0,997220401 | 0,44  | 0,560049354 | 1,1   | 0,113935413 |
| Spata5l1   | 0,62  | 0,148272667 | -0,01 | 0,999395995 | -0,02 | 0,983189886 | 0,12  | 0,754808755 | 0,47  | 0,328821044 |
| Spata6     | -0,02 | 0,978853388 | 0,14  | 0,783325809 | 0,44  | 0,543291636 | 0,6   | 0,522511755 | 0,41  | 0,705047619 |
| Spata7     | 0,09  | 0,877942803 | 0,21  | 0,887005798 | 0,32  | 0,70398922  | -0,33 | 0,460652402 | -0,74 | 0,497752039 |
| Spata9     | 0,29  | 0,601276046 | -0,03 | 0,987162042 | -0,41 | 0,672683349 | 0,09  | 0,869497105 | -0,22 | 0,675151504 |
| Spatc1     | 0,53  | 0,513299782 | 0,35  | 0,644818618 | -0,23 | 0,838289412 | 0,32  | 0,430056151 | 0,21  | 0,739804907 |
| Spatc1l    | 0,07  | 0,916275746 | 0,16  | 0,828498885 | -0,18 | 0,871284554 | 0,19  | 0,702446624 | -0,11 | 0,935812103 |
| Spats1     | 0,26  | 0,778869381 | -0,39 | 0,568304052 | -0,46 | 0,485752425 | 0,43  | 0,43636337  | 0,41  | 0,583969091 |
| Spats2     | -0,69 | 0,110762724 | -0,41 | 0,753873417 | 0,92  | 0,140777124 | 1,52  | 0,128164731 | -0,75 | 0,436708262 |
| Spats2l    | -0,12 | 0,867243066 | 0,44  | 0,275848556 | 0,02  | 0,991568687 | -0,67 | 0,319385987 | 0,83  | 0,216124082 |
| Spc24      | -1,14 | 0,180321324 | -1,54 | 0,137833549 | 1,11  | 0,032673349 | 1,75  | 0,031862962 | -0,13 | 0,899093911 |
| Spc25      | -0,75 | 0,480280008 | -0,42 | 0,683623242 | 1,4   | 0,189146758 | 1,85  | 0,021416936 | -0,2  | 0,865258929 |
| Spcs1      | 0,32  | 0,550956224 | -0,12 | 0,935041212 | -0,17 | 0,899913569 | 0,02  | 0,987977078 | -0,25 | 0,828679046 |
| Spcs2      | 0,05  | 0,945233773 | -0,12 | 0,842145037 | 0,57  | 0,445616611 | 0,34  | 0,324794827 | 0,2   | 0,760401775 |
| Spcs3      | -0,2  | 0,820750197 | -0,61 | 0,232378975 | 0,98  | 0,548913544 | 0,58  | 0,461089385 | 0,23  | 0,830813323 |
| Spdef      | 0,01  | 0,991919022 | -0,03 | 0,989873399 | -0,35 | 0,625745801 | -0,16 | 0,835214439 | -0,02 | 0,984724142 |
| Spdl1      | -0,13 | 0,899660614 | -1,2  | 0,451300267 | 1,19  | 0,078902804 | 2,24  | 0,037141974 | 0,37  | 0,748710615 |
| Spdya      | 0,46  | 0,480085261 | -0,17 | 0,882847123 | -0,45 | 0,446809981 | -0,16 | 0,861140391 | 0,3   | 0,743487161 |
| Spdye4a    | -0,12 | 0,84241758  | -0,08 | 0,958545812 | -0,14 | 0,830336321 | 0,06  | 0,899335603 | 0,06  | 0,951471487 |

|            |       |             |       |             |       |             |       |             |       |             |
|------------|-------|-------------|-------|-------------|-------|-------------|-------|-------------|-------|-------------|
| Spdye4b    | 0,65  | 0,257958071 | 0,13  | 0,938233008 | 0,09  | 0,956445791 | 0,31  | 0,698362346 | 0,04  | 0,979456872 |
| Specc1     | -0,66 | 0,421029929 | 0,24  | 0,790939978 | 0,26  | 0,804464833 | -1,7  | 0,090151414 | 0,22  | 0,885872093 |
| Specc1l    | -0,33 | 0,687662951 | -0,02 | 0,982466032 | 0,13  | 0,909233941 | -0,53 | 0,189010089 | -0,16 | 0,868602248 |
| Speer2     | 0     | 0,999042849 | 0,12  | 0,790958831 | -0,48 | 0,273645359 | -0,25 | 0,548530772 | 0,14  | 0,872443959 |
| Speer3     | -0,22 | 0,692841452 | -0,32 | 0,68442935  | -0,08 | 0,907367497 | 0,17  | 0,720900596 | 0,17  | 0,860058375 |
| Speer4c    | 0,11  | 0,894248924 | 0,17  | 0,820806352 | -0,17 | 0,777210497 | -0,28 | 0,371522408 | 0,03  | 0,971058066 |
| Speer4cos  | 0,32  | 0,701391957 | 0,09  | 0,854940418 | 0,06  | 0,950725218 | 0,37  | 0,541971276 | 0,08  | 0,948163009 |
| Speer4f1   | 0,32  | 0,665037431 | 0,12  | 0,829839151 | -0,2  | 0,816883729 | -0,25 | 0,710116369 | 0,26  | 0,731527639 |
| Speer4f2   | -0,8  | 0,298771977 | 0,48  | 0,756813839 | 0,28  | 0,777417583 | 0,4   | 0,253174967 | 0,58  | 0,278863058 |
| Speer5-ps1 | 0,19  | 0,634025092 | 0,21  | 0,798252199 | 0,14  | 0,857466061 | -0,28 | 0,383379702 | -0,16 | 0,779920985 |
| Speer6-ps1 | 0,31  | 0,712570929 | 0,01  | 0,992175086 | -0,33 | 0,661089127 | 0,06  | 0,921423877 | 0,17  | 0,85843845  |
| Speer8-ps1 | 0,29  | 0,617280733 | 0,04  | 0,954948291 | -0,32 | 0,500343254 | -0,21 | 0,70517561  | -0,08 | 0,933307994 |
| Speer9-ps1 | 0,14  | 0,798459433 | 0,12  | 0,912137323 | -0,02 | 0,982262443 | -0,07 | 0,908535783 | 0,38  | 0,443817964 |
| Spf1       | -0,25 | 0,701391957 | 0,28  | 0,593830815 | 0,17  | 0,953456022 | 0,35  | 0,622994555 | 0,01  | 0,991437885 |
| Spf2       | -0,33 | 0,436359527 | 0,24  | 0,689924866 | -0,09 | 0,955984004 | -0,66 | 0,097061027 | -0,51 | 0,274394155 |
| Spf3       | 0,18  | 0,688503606 | 0,18  | 0,729741948 | 0,17  | 0,770526999 | -0,79 | 0,063285142 | -0,18 | 0,792404969 |
| Spem1      | -0,05 | 0,953868772 | 1,24  | 0,352137531 | 0,04  | 0,986853659 | -0,4  | 0,679886975 | -0,11 | 0,948759136 |
| Spem       | -0,11 | 0,907748757 | 0,05  | 0,958818588 | 0,15  | 0,807786405 | -0,88 | 0,124176793 | -0,3  | 0,71265105  |
| Spert      | 0,23  | 0,772704833 | 0,14  | 0,805949528 | -0,08 | 0,922274387 | 0,01  | 0,985865561 | 0,03  | 0,979152939 |
| Spesp1     | 0,08  | 0,890205603 | -0,29 | 0,732847182 | -0,06 | 0,947881687 | 0,11  | 0,858632076 | -0,03 | 0,976743304 |
| Spg11      | -0,11 | 0,888962766 | -0,03 | 0,956935029 | 0,06  | 0,964792312 | 0,13  | 0,873812847 | 0,22  | 0,82482852  |
| Spg20      | -0,61 | 0,489008935 | 0,15  | 0,848821789 | 0,48  | 0,465949919 | -0,68 | 0,363922515 | -0,7  | 0,442579293 |
| Spg21      | 0,29  | 0,532523475 | 0,46  | 0,317755212 | 0,32  | 0,703647945 | 0,01  | 0,996287679 | 0,13  | 0,906031862 |
| Spg7       | -0,42 | 0,546545311 | -0,05 | 0,952937385 | 0,07  | 0,943788892 | 0,05  | 0,962528932 | -0,16 | 0,890833196 |
| Sphk1      | 0,64  | 0,253433585 | 0,47  | 0,255730657 | -0,19 | 0,764671707 | -0,53 | 0,142462049 | 0,12  | 0,875421436 |
| Sphk2      | -0,14 | 0,864403632 | 0,09  | 0,929692416 | 0,08  | 0,930836343 | 0     | 1           | 0,25  | 0,650292523 |
| Sphkap     | 0,31  | 0,513313111 | 0,28  | 0,73623784  | 0,02  | 0,988120354 | -0,77 | 0,520046332 | -0,54 | 0,710864518 |
| Spi1       | 0,16  | 0,829299665 | -0,3  | 0,569633919 | -0,26 | 0,669266652 | 0,48  | 0,230415121 | 0,37  | 0,508153495 |
| Spib       | 0,04  | 0,975664126 | -0,57 | 0,656204868 | 0,09  | 0,919116989 | 0,03  | 0,958172386 | 0,41  | 0,573801069 |
| Spic       | -0,08 | 0,911800803 | 0,08  | 0,903595287 | 0,3   | 0,633535699 | 0,03  | 0,967866794 | 0,5   | 0,526113427 |
| Spice1     | 0,1   | 0,964154899 | 0,4   | 0,746587808 | 0,71  | 0,199678278 | -1,75 | 0,094011812 | -0,6  | 0,558284622 |
| Spidr      | 0,18  | 0,853941141 | 0,14  | 0,814336446 | -0,33 | 0,763155127 | -0,39 | 0,330726444 | -0,64 | 0,351204278 |
| Spin1      | -0,26 | 0,592989013 | -0,03 | 0,959209847 | 0,18  | 0,777918093 | -0,04 | 0,943508556 | 0,1   | 0,894882026 |
| Spin2c     | -0,42 | 0,580512951 | 0,05  | 0,981926729 | -0,11 | 0,904057901 | 0,02  | 0,98149042  | -0,65 | 0,348831911 |
| Spin2d     | 0,85  | 0,232146071 | 0,25  | 0,926157704 | -0,09 | 0,915418147 | -0,54 | 0,433860147 | 0,58  | 0,565817768 |

|           |       |             |       |             |       |             |       |             |       |             |
|-----------|-------|-------------|-------|-------------|-------|-------------|-------|-------------|-------|-------------|
| Spin2-ps1 | 0,04  | 0,948926586 | 0,01  | 0,985415913 | 0,07  | 0,94178334  | -0,11 | 0,7593408   | 0,28  | 0,585285463 |
| Spin4     | 0,11  | 0,822107047 | -0,22 | 0,680709276 | 0,22  | 0,794189201 | -0,54 | 0,344978832 | 0,02  | 0,990633766 |
| Spink1    | 0,43  | 0,358272587 | -0,45 | 0,728372441 | 0,03  | 0,982373116 | -3,46 | 0,012590736 | -0,14 | 0,967522546 |
| Spink10   | 0,38  | 0,321798414 | -0,12 | 0,924916733 | -0,18 | 0,860716182 | 0,29  | 0,725672514 | -0,34 | 0,592505698 |
| Spink11   | 0,04  | 0,960597621 | 0,08  | 0,933320126 | 0,31  | 0,792886254 | -0,04 | 0,97089733  | 0,13  | 0,92132927  |
| Spink12   | -0,32 | 0,696105742 | 0,08  | 0,936792848 | 0,09  | 0,947460329 | 0,09  | 0,831289571 | 0,17  | 0,863207879 |
| Spink13   | 0,04  | 0,94916801  | 0,15  | 0,781665479 | 0,01  | 0,99416325  | -0,16 | 0,680884988 | 0,03  | 0,979483246 |
| Spink14   | -0,18 | 0,687662951 | 0,1   | 0,916730432 | -0,15 | 0,808747196 | -0,22 | 0,682436767 | -0,1  | 0,896355106 |
| Spink2    | 0,07  | 0,972682121 | -0,66 | 0,574343122 | 0,07  | 0,963725374 | 0,85  | 0,115649738 | -0,1  | 0,890957032 |
| Spink4    | -0,49 | 0,39120208  | -0,12 | 0,877594785 | 0     | 0,999931921 | 0,31  | 0,732505868 | -0,15 | 0,917075631 |
| Spink5    | -0,52 | 0,302609278 | 0,04  | 0,971801869 | 0,13  | 0,905209657 | -0,09 | 0,962528932 | -0,06 | 0,979456872 |
| Spink6    | 0,41  | 0,302609278 | 0,11  | 0,900801202 | -0,33 | 0,471873683 | -0,06 | 0,922778648 | -0,03 | 0,977967676 |
| Spink7    | 0,01  | 0,993175772 | 0,27  | 0,586770731 | -0,5  | 0,455246363 | 0,05  | 0,935479799 | 0,54  | 0,316401979 |
| Spink8    | 0,01  | 0,991919022 | 0,34  | 0,674643073 | -0,54 | 0,172712848 | -0,31 | 0,758772982 | -0,55 | 0,632342806 |
| Spinkl    | 0,2   | 0,692978458 | 0,05  | 0,941811651 | 0,14  | 0,85952125  | -0,51 | 0,547286019 | 0,06  | 0,968130547 |
| Spint1    | -0,06 | 0,948291116 | 0,32  | 0,77148563  | 1,45  | 0,066172795 | -0,08 | 0,914640741 | 0,63  | 0,515556164 |
| Spint2    | -0,35 | 0,59710379  | -0,22 | 0,840864779 | 1,62  | 0,038411212 | 0,51  | 0,219633386 | -0,05 | 0,954657649 |
| Spint3    | -0,13 | 0,840909921 | -0,07 | 0,92948115  | -0,28 | 0,544756897 | 0,62  | 0,15999424  | 0,09  | 0,923040447 |
| Spint4    | -0,05 | 0,944807001 | 0,34  | 0,758387553 | -0,18 | 0,811424918 | -0,48 | 0,146822291 | -0,39 | 0,496305418 |
| Spint5    | 0,03  | 0,955321816 | -0,2  | 0,746613401 | -0,11 | 0,876494149 | -0,01 | 0,97580676  | 0,06  | 0,948163009 |
| Spire1    | -0,76 | 0,260634235 | -0,73 | 0,555811578 | 0,55  | 0,435916963 | 0,58  | 0,664161531 | 0,09  | 0,973333131 |
| Spire2    | -0,29 | 0,69184055  | -0,02 | 0,98459889  | -0,19 | 0,809062815 | 0,91  | 0,046206622 | 0,14  | 0,861254758 |
| Spn       | 0,06  | 0,9231839   | -0,28 | 0,680007285 | 0,37  | 0,66027586  | 0,04  | 0,9704566   | -0,02 | 0,989183416 |
| Spn-ps    | -0,13 | 0,843046001 | -0,31 | 0,638366221 | -0,39 | 0,549836783 | 0,33  | 0,382558073 | -0,33 | 0,731041564 |
| Spns1     | 0     | 0,999041198 | 0,03  | 0,973945454 | 0,3   | 0,590832576 | -0,12 | 0,85301747  | -0,26 | 0,677687906 |
| Spns2     | 0,01  | 0,991216662 | -0,3  | 0,508633526 | -0,33 | 0,635864143 | 0,97  | 0,105547956 | -0,06 | 0,961746463 |
| Spns3     | 0,04  | 0,964502812 | 0,14  | 0,850001559 | 0,22  | 0,718340918 | 0,51  | 0,237578972 | 0,03  | 0,974553568 |
| Spo11     | 0,61  | 0,673425553 | 0,79  | 0,221902756 | -0,06 | 0,948637233 | -0,37 | 0,402631598 | 0,06  | 0,955836352 |
| Spocd1    | -0,3  | 0,696679393 | 0,13  | 0,867265251 | 0     | 0,999571656 | 0,21  | 0,609415126 | -0,11 | 0,917298633 |
| Spock1    | 0,21  | 0,717407143 | 0,11  | 0,845762833 | -0,83 | 0,13589176  | -0,39 | 0,64965626  | -0,14 | 0,915067495 |
| Spock2    | 0,29  | 0,62872508  | -0,29 | 0,707071624 | 0,17  | 0,853976176 | -0,02 | 0,985897275 | 0,13  | 0,894623317 |
| Spock3    | 0,61  | 0,187002581 | 0,38  | 0,775914311 | -0,53 | 0,409611548 | -0,26 | 0,689594535 | -0,12 | 0,91314596  |
| Spon1     | -0,01 | 0,989536427 | 0,11  | 0,874049742 | 0,06  | 0,940186069 | -1,62 | 0,065649822 | -0,58 | 0,549785483 |
| Spon2     | -0,09 | 0,929470074 | -0,14 | 0,815791007 | 0,26  | 0,743652947 | -0,26 | 0,648473202 | -0,25 | 0,745134899 |
| Spop      | 0,07  | 0,911399028 | 0,35  | 0,622161495 | -0,61 | 0,440550754 | 1,1   | 0,031576273 | 1,17  | 0,027120309 |

|           |       |             |       |             |       |             |       |             |       |             |
|-----------|-------|-------------|-------|-------------|-------|-------------|-------|-------------|-------|-------------|
| Spopl     | -1,17 | 0,256112056 | -0,64 | 0,214682893 | 0,27  | 0,864691151 | 0,98  | 0,187168058 | 0,9   | 0,291178873 |
| Spp1      | -0,61 | 0,13473547  | -0,59 | 0,576723643 | 1,77  | 0,009489185 | -0,38 | 0,56693064  | -0,21 | 0,888662371 |
| Spp2      | 0,27  | 0,599011121 | 0,45  | 0,688435265 | 0,1   | 0,864411302 | -0,87 | 0,230297952 | 0,16  | 0,913661935 |
| Sppl2a    | 0,63  | 0,205427898 | 0,43  | 0,404698188 | -0,54 | 0,35431494  | -0,19 | 0,626690659 | 0,65  | 0,177156585 |
| Sppl2b    | -0,22 | 0,769299413 | -0,17 | 0,75380926  | -0,42 | 0,592642641 | 0,16  | 0,694965346 | -0,35 | 0,456658287 |
| Sppl2c    | 0,07  | 0,917014629 | -0,08 | 0,924916733 | -0,46 | 0,317001071 | 0,02  | 0,969859375 | 0,51  | 0,336101453 |
| Sppl3     | -0,05 | 0,962460951 | -0,27 | 0,722369153 | 0,11  | 0,902833174 | 0,23  | 0,55067293  | -0,09 | 0,905758282 |
| Spr       | -0,71 | 0,147882334 | -0,3  | 0,426168855 | 0,69  | 0,37541846  | -0,28 | 0,512311402 | -0,02 | 0,984125319 |
| Spred1    | -0,41 | 0,578154278 | 0,1   | 0,906234611 | -0,4  | 0,669548016 | 1,18  | 0,096085093 | 0,31  | 0,765340194 |
| Spred2    | -0,24 | 0,679451519 | -0,01 | 0,994161588 | -0,19 | 0,747599709 | 0,11  | 0,857884225 | -0,49 | 0,359549867 |
| Spred3    | 0,02  | 0,981660925 | 0,25  | 0,623157194 | -0,31 | 0,860923344 | 1,39  | 0,040937914 | -0,04 | 0,960974478 |
| Sprn      | 0,05  | 0,94727537  | -0,28 | 0,708684603 | 0,12  | 0,921538779 | 0,3   | 0,696607541 | -0,51 | 0,420919138 |
| Sprr1a    | 0,06  | 0,91694318  | -0,39 | 0,418418761 | 0,75  | 0,36356264  | 0,17  | 0,660110505 | 0,2   | 0,765809384 |
| Sprr1b    | -0,46 | 0,305864243 | -0,5  | 0,574512197 | -0,31 | 0,71713065  | 0,4   | 0,728067633 | 0,38  | 0,726042963 |
| Sprr2a3   | 0,14  | 0,785268526 | -0,24 | 0,616390644 | -0,01 | 0,997394645 | 0,1   | 0,817350846 | -0,08 | 0,910721379 |
| Sprr2b    | 0,12  | 0,840909921 | -0,01 | 0,990380046 | -0,13 | 0,843617662 | 0,05  | 0,921731995 | -0,07 | 0,942469511 |
| Sprr2d    | -0,02 | 0,983516046 | 0,04  | 0,946885634 | -0,11 | 0,90345282  | 0,09  | 0,878232273 | 0,08  | 0,925858284 |
| Sprr2e    | 0,05  | 0,919758492 | 0,08  | 0,919873208 | -0,11 | 0,880706627 | -0,28 | 0,485363243 | -0,33 | 0,583434544 |
| Sprr2f    | -0,07 | 0,921306075 | 0,11  | 0,943202063 | -0,17 | 0,86935713  | -0,03 | 0,976294623 | 0,13  | 0,864006331 |
| Sprr2g    | -0,01 | 0,995013944 | 0,2   | 0,775155136 | 0,01  | 0,991456043 | -0,44 | 0,235558038 | -0,16 | 0,840132007 |
| Sprr2h    | -0,51 | 0,220541198 | 0,22  | 0,792112243 | -0,28 | 0,698662367 | 0,06  | 0,920521047 | 0,09  | 0,925858284 |
| Sprr2i    | 0,18  | 0,757032046 | 0,12  | 0,854940418 | 0,16  | 0,786933951 | -0,07 | 0,872512015 | 0,16  | 0,864373858 |
| Sprr2j-ps | -0,05 | 0,943079514 | 0,06  | 0,978904487 | -0,16 | 0,862441091 | -0,22 | 0,631307578 | -0,37 | 0,448887062 |
| Sprr2k    | 0,27  | 0,598582945 | 0,29  | 0,815022365 | -0,04 | 0,974971222 | 0,3   | 0,578754575 | 0,84  | 0,266832581 |
| Sprr3     | 0,11  | 0,815489016 | 0,16  | 0,764289173 | 0     | 0,998479656 | -0,46 | 0,43636337  | -0,32 | 0,608367062 |
| Sprr4     | 0,03  | 0,959985598 | 0,01  | 0,986782918 | -0,03 | 0,966359868 | 0,1   | 0,820745707 | -0,09 | 0,916297433 |
| Sprtn     | -0,31 | 0,614815588 | 0,12  | 0,80678645  | 0,51  | 0,30134516  | -0,48 | 0,603471344 | -0,03 | 0,982321176 |
| Spry1     | -0,41 | 0,500870793 | -0,01 | 0,99687092  | -0,04 | 0,97674065  | 0,03  | 0,969561409 | -0,79 | 0,257751018 |
| Spry2     | 0,05  | 0,948291116 | 0,22  | 0,583764309 | 0,34  | 0,514610288 | 0,47  | 0,156217103 | -0,05 | 0,954921335 |
| Spry3     | -0,39 | 0,607568823 | 0,08  | 0,912340934 | -0,26 | 0,656037746 | -0,19 | 0,619611108 | -0,16 | 0,880552266 |
| Spry4     | -0,5  | 0,233724704 | -0,17 | 0,665732591 | 0,62  | 0,465949919 | 0,48  | 0,134164817 | -0,44 | 0,340006862 |
| Spryd3    | -0,71 | 0,433492052 | -0,4  | 0,539322374 | 1,17  | 0,034161362 | -0,22 | 0,721611115 | -0,31 | 0,673120647 |
| Spryd4    | -0,43 | 0,456603923 | -0,5  | 0,485998876 | 0,2   | 0,833575885 | 0,59  | 0,300462395 | 0,01  | 0,996625245 |
| Spryd7    | 0,04  | 0,957427783 | 0,52  | 0,410689889 | -0,57 | 0,379227535 | -1,7  | 0,03032795  | 0,36  | 0,631872562 |
| Spsb1     | 0,2   | 0,810208393 | 0,09  | 0,910688765 | 0,58  | 0,178604539 | 1,34  | 0,070650676 | 0,23  | 0,796713037 |

|          |       |             |       |             |       |             |       |             |       |             |
|----------|-------|-------------|-------|-------------|-------|-------------|-------|-------------|-------|-------------|
| Spsb2    | 0,02  | 0,986795639 | -0,01 | 0,998239324 | 0,49  | 0,666788913 | 0,26  | 0,48546658  | 0,05  | 0,976743304 |
| Spsb3    | -0,18 | 0,795424954 | 0,22  | 0,813516293 | 0,4   | 0,632683708 | -0,18 | 0,840946891 | -0,6  | 0,462558109 |
| Spsb4    | -0,12 | 0,892124736 | 0,1   | 0,919841135 | -0,33 | 0,611144549 | 0,42  | 0,381877273 | 0,06  | 0,965421285 |
| Spta1    | 0,16  | 0,753450161 | -0,03 | 0,970832543 | -0,19 | 0,729796531 | -0,07 | 0,926377487 | 0,1   | 0,935812103 |
| Sptan1   | -0,56 | 0,204159006 | -0,13 | 0,822581347 | 0,02  | 0,982305856 | -0,42 | 0,185628374 | -0,46 | 0,338461772 |
| Sptb     | 0,19  | 0,758636946 | -0,29 | 0,568282579 | 0,13  | 0,830541787 | 0,06  | 0,939446012 | -0,43 | 0,585244465 |
| Sptbn1   | -0,09 | 0,883923631 | -0,1  | 0,860142618 | 0,04  | 0,968742139 | -0,68 | 0,091029903 | -0,21 | 0,724669859 |
| Sptbn2   | 0,83  | 0,354604769 | 0,61  | 0,327968427 | -0,3  | 0,729031049 | 0,57  | 0,574022844 | -0,12 | 0,940774655 |
| Sptbn4   | 0,14  | 0,840563112 | -0,19 | 0,894640653 | -0,71 | 0,119299768 | 0,08  | 0,900918368 | -0,2  | 0,732679577 |
| Sptbn5   | 0,06  | 0,913546177 | -0,23 | 0,714047107 | -0,23 | 0,647928093 | 0,33  | 0,70517561  | 0,09  | 0,954565959 |
| Sptlc1   | -0,19 | 0,825308689 | 0,04  | 0,980518468 | 0,17  | 0,831266864 | -0,31 | 0,486912097 | 0,26  | 0,677687906 |
| Sptlc2   | -0,2  | 0,661820776 | -0,09 | 0,900801202 | 0,11  | 0,909717677 | -0,45 | 0,371522408 | 0,26  | 0,703670469 |
| Sptlc3   | 0,12  | 0,873017028 | 0,08  | 0,913909539 | -0,51 | 0,569973916 | 0,13  | 0,790111178 | 0,23  | 0,853107295 |
| Sptssa   | -0,35 | 0,680520303 | -0,41 | 0,5008494   | -0,14 | 0,922318683 | -0,72 | 0,091324653 | -0,72 | 0,207567334 |
| Sptssb   | 0,37  | 0,648730873 | 0,38  | 0,783766709 | -0,08 | 0,95204022  | 0,05  | 0,927735789 | -0,04 | 0,973428839 |
| Spty2d1  | 0,1   | 0,872356025 | 0,1   | 0,897811179 | 0,24  | 0,738086762 | -0,24 | 0,532742484 | -0,23 | 0,707081609 |
| Spx      | 0,75  | 0,399784464 | -0,26 | 0,898154642 | -0,02 | 0,986322196 | 0,44  | 0,530723335 | 0,2   | 0,800540569 |
| Spz1     | -0,31 | 0,572570614 | 0     | 0,998929981 | 0,01  | 0,996260936 | 0,16  | 0,843906148 | 0,13  | 0,913414593 |
| Sqle     | -0,9  | 0,173834488 | -0,14 | 0,829839151 | 2,01  | 0,010747791 | 1,11  | 0,097755932 | 1,17  | 0,142148848 |
| Sqrdl    | -0,06 | 0,956452501 | -0,17 | 0,908953517 | 0,27  | 0,868451584 | -0,57 | 0,651912181 | 0,62  | 0,592460098 |
| Sqstm1   | -0,03 | 0,96311249  | -0,11 | 0,828219939 | -0,04 | 0,953345773 | 0,12  | 0,778817721 | -0,1  | 0,890833196 |
| Sra1     | 0,35  | 0,534498513 | -0,04 | 0,952352299 | 0,29  | 0,613380021 | 0,25  | 0,531468445 | -0,01 | 0,9939542   |
| Srbd1    | -0,08 | 0,955365755 | -0,01 | 0,997935558 | 1,66  | 0,094893928 | 0,54  | 0,82237355  | 0,53  | 0,825272094 |
| Src      | 0,14  | 0,846840544 | -0,32 | 0,660836021 | 0,5   | 0,412427594 | 0,56  | 0,140956925 | 0,38  | 0,555783555 |
| Srcap    | -0,32 | 0,68423035  | 0,23  | 0,637452806 | 0     | 0,998479656 | -0,37 | 0,37252791  | -0,21 | 0,752187547 |
| Srcin1   | -0,06 | 0,940507691 | -0,09 | 0,908448947 | -0,21 | 0,748973263 | 0,05  | 0,94180692  | -0,01 | 0,990755546 |
| Srd5a1   | -0,44 | 0,752287362 | -0,44 | 0,805949528 | 1,72  | 0,04567432  | 0,93  | 0,175013276 | -1,97 | 0,01706209  |
| Srd5a2   | 0,18  | 0,703606438 | 0,21  | 0,809683705 | -0,04 | 0,958214619 | -0,26 | 0,602857619 | 0,86  | 0,104993705 |
| Srd5a3   | -0,22 | 0,736653192 | 0,15  | 0,88325516  | 1,73  | 0,1667993   | 0,22  | 0,879741594 | 0,3   | 0,861977667 |
| Srebf1   | -0,6  | 0,273887426 | -0,15 | 0,849598968 | 0,09  | 0,897932497 | 0,27  | 0,617560575 | -0,43 | 0,40189401  |
| Srebf2   | -0,67 | 0,25387015  | -0,43 | 0,30567226  | 0,58  | 0,517794976 | 0,3   | 0,358292362 | -0,19 | 0,856029945 |
| Srek1    | -0,03 | 0,969826004 | -0,09 | 0,89034555  | 0     | 0,998479656 | 0,5   | 0,140016857 | 0,48  | 0,558284622 |
| Srek1ip1 | -0,21 | 0,761457464 | -0,66 | 0,244905942 | -0,02 | 0,993379272 | 0,21  | 0,71158821  | -0,46 | 0,529563246 |
| Srf      | -0,14 | 0,859481811 | 0,04  | 0,956555856 | 0,25  | 0,770526999 | 0,8   | 0,126608574 | -0,1  | 0,890833196 |
| Srfbp1   | 0,12  | 0,895400682 | 0,34  | 0,555137972 | 0,44  | 0,787455112 | 0,32  | 0,806145597 | 0,65  | 0,578461575 |

|         |       |             |       |             |       |             |       |             |       |             |
|---------|-------|-------------|-------|-------------|-------|-------------|-------|-------------|-------|-------------|
| Srgap1  | -0,37 | 0,597519827 | -0,41 | 0,501438027 | 0,69  | 0,546857162 | 1,33  | 0,139647943 | -0,33 | 0,763240477 |
| Srgap2  | 0,06  | 0,911800803 | 0,2   | 0,697354745 | -0,16 | 0,840187016 | 0,42  | 0,213931075 | -0,3  | 0,585528929 |
| Srgap3  | -0,07 | 0,950897622 | -0,07 | 0,958621018 | 0,09  | 0,947460329 | 0,25  | 0,594574312 | -0,57 | 0,192920243 |
| Srgn    | 0,47  | 0,389373004 | 0,55  | 0,167620151 | -0,27 | 0,689975873 | -0,93 | 0,027443269 | 0,2   | 0,702149091 |
| Sri     | 0,1   | 0,801665973 | 0,03  | 0,959837002 | 0,04  | 0,96080423  | -0,2  | 0,534370279 | -0,12 | 0,852287138 |
| Srl     | -0,22 | 0,729638783 | 0,14  | 0,735689605 | -0,22 | 0,64759465  | -0,34 | 0,512724455 | -0,4  | 0,40189401  |
| Srm     | -0,52 | 0,235549559 | -1,12 | 0,104971247 | 0,76  | 0,180205458 | 1,52  | 0,016268665 | -0,1  | 0,916510826 |
| Srms    | 0,4   | 0,701297763 | 0,25  | 0,613429827 | 0,26  | 0,777417583 | -1,39 | 0,076292801 | -0,88 | 0,127165186 |
| Srp14   | 0,05  | 0,944291635 | 0,07  | 0,958545812 | -0,13 | 0,830541787 | 0     | 0,999809258 | 0,41  | 0,562557824 |
| Srp19   | -0,21 | 0,81630789  | -0,34 | 0,593605226 | 0,23  | 0,838242917 | 0,72  | 0,141647436 | 0,4   | 0,502676586 |
| Srp54a  | -0,58 | 0,395628811 | 0,28  | 0,694017753 | 0,86  | 0,151352948 | 0,24  | 0,737710335 | 0,42  | 0,607522533 |
| Srp54c  | -0,1  | 0,835292881 | 0,12  | 0,853162838 | -0,03 | 0,975982548 | 0,52  | 0,216503048 | 0,37  | 0,475018341 |
| Srp68   | -0,39 | 0,408189594 | -0,38 | 0,424031137 | 0     | 0,999931921 | 0,57  | 0,149197029 | -0,34 | 0,640213665 |
| Srp72   | -0,09 | 0,858750474 | -0,23 | 0,614233457 | 0,3   | 0,57717258  | 0,56  | 0,094488825 | 0,12  | 0,876666201 |
| Srp9    | -0,12 | 0,818182081 | 0,07  | 0,890680587 | 0,51  | 0,265846442 | 0,68  | 0,071772884 | 0,16  | 0,795326093 |
| Srpk1   | -0,62 | 0,104496111 | -0,27 | 0,594415097 | 0,22  | 0,654193421 | 0,77  | 0,075624853 | 0,15  | 0,824818547 |
| Srpk2   | 0,12  | 0,811215544 | 0,59  | 0,242593184 | 0,04  | 0,974410099 | -0,55 | 0,259461306 | -0,36 | 0,585298066 |
| Srpk3   | 0,07  | 0,884190046 | 0,09  | 0,932292974 | 0,01  | 0,993379272 | -0,14 | 0,900529161 | -0,35 | 0,712968816 |
| Srpr    | -0,12 | 0,849751597 | -0,02 | 0,9860901   | -0,5  | 0,392729956 | -0,01 | 0,994279933 | 0,07  | 0,934344891 |
| Srprb   | -0,45 | 0,214699934 | -0,44 | 0,424863079 | 0,46  | 0,321280032 | 0,61  | 0,078238769 | 0,06  | 0,939607682 |
| Srpx    | 0,02  | 0,982432452 | 0,38  | 0,733269724 | -0,03 | 0,977534311 | 0,12  | 0,86288133  | -0,36 | 0,724153471 |
| Srpx2   | -0,51 | 0,241909582 | -0,67 | 0,362448332 | -0,28 | 0,672766751 | 0,57  | 0,27199617  | -0,11 | 0,917388463 |
| Srr     | 0,31  | 0,680520303 | 0,12  | 0,912137323 | 0,02  | 0,991563244 | -0,56 | 0,125117251 | -0,23 | 0,678357331 |
| Srrd    | -0,45 | 0,680520303 | -0,77 | 0,245917773 | 0,35  | 0,585530343 | 0,01  | 0,988559695 | 0,27  | 0,687273054 |
| Srrm1   | -0,17 | 0,831656655 | -0,31 | 0,434114626 | -0,08 | 0,924900978 | 0,55  | 0,165106019 | 0,22  | 0,757674948 |
| Srrm2   | 0,24  | 0,560461791 | 0,3   | 0,424863079 | -0,26 | 0,745313546 | -0,46 | 0,267203723 | 0,21  | 0,77959286  |
| Srrm3   | 0,24  | 0,64866902  | 0     | 0,999438768 | -0,36 | 0,70635953  | 0,42  | 0,460307888 | 0,16  | 0,86229485  |
| Srrm3os | 0,36  | 0,460231397 | 0,11  | 0,820806352 | -0,26 | 0,659555232 | -0,27 | 0,416790004 | -0,08 | 0,92577365  |
| Srrm4   | 0,22  | 0,690720312 | -0,11 | 0,910010735 | -0,54 | 0,310532869 | 0,17  | 0,789076738 | 0,12  | 0,891925115 |
| Srrm4os | 0,15  | 0,856984761 | 0,05  | 0,969314504 | 0,34  | 0,782903557 | -0,07 | 0,949328732 | 0,19  | 0,904280267 |
| Srrt    | -0,45 | 0,446039618 | -0,37 | 0,466871612 | -0,09 | 0,921956183 | 0,27  | 0,673534755 | 0,3   | 0,715721584 |
| Srsf1   | -0,14 | 0,858977038 | -0,16 | 0,939289739 | 0,09  | 0,941254389 | 0,51  | 0,699435233 | 0,61  | 0,489004857 |
| Srsf11  | 0,12  | 0,79059266  | -0,08 | 0,927073711 | -0,01 | 0,994076654 | -0,08 | 0,904690757 | -0,1  | 0,902802615 |
| Srsf12  | -0,12 | 0,839668007 | 0,07  | 0,939289739 | -0,36 | 0,568619313 | 0,27  | 0,432798483 | 0,19  | 0,762105118 |
| Srsf2   | -0,34 | 0,736503749 | -0,27 | 0,775155136 | 0,02  | 0,990512579 | -0,35 | 0,428855564 | 0,47  | 0,376385479 |

|        |       |             |       |             |       |             |       |             |       |             |
|--------|-------|-------------|-------|-------------|-------|-------------|-------|-------------|-------|-------------|
| Srsf3  | 0,09  | 0,902939265 | -0,04 | 0,966078321 | 0,05  | 0,966414094 | -0,34 | 0,316697742 | 0,55  | 0,249774523 |
| Srsf4  | 0,01  | 0,996998625 | -0,06 | 0,972336944 | 0,25  | 0,794194778 | 0,42  | 0,576859946 | 0,83  | 0,131528623 |
| Srsf5  | -0,36 | 0,581127661 | 0,27  | 0,530022884 | -0,2  | 0,823890116 | -0,21 | 0,743102918 | 0,17  | 0,83178796  |
| Srsf6  | 0,24  | 0,690085958 | -0,15 | 0,780374403 | 0,26  | 0,685933617 | 0,58  | 0,123961932 | 0,37  | 0,442579293 |
| Srsf7  | -0,25 | 0,617280733 | 0,11  | 0,858860016 | -0,02 | 0,974628464 | -0,22 | 0,703281567 | 0,47  | 0,424134691 |
| Srsf9  | -0,49 | 0,256385653 | -0,08 | 0,917832564 | 0,33  | 0,543981459 | 0,31  | 0,307420592 | -0,17 | 0,817625207 |
| Srsy   | 0,1   | 0,832696131 | -0,01 | 0,984000632 | -0,09 | 0,899292348 | 0     | 0,999774614 | -0,18 | 0,740830591 |
| Srxn1  | -0,53 | 0,491560172 | -0,34 | 0,357085199 | 0,03  | 0,972531974 | 1,01  | 0,414522125 | 0,14  | 0,939448119 |
| Sry    | 0,05  | 0,94881239  | 0,2   | 0,703923817 | 0,08  | 0,911017075 | -0,07 | 0,894805454 | 0,13  | 0,876714296 |
| Ss18   | -0,15 | 0,838825457 | 0     | 0,999395995 | -0,04 | 0,960189482 | 0,19  | 0,675642366 | 0,36  | 0,487884435 |
| Ss18l1 | 0,18  | 0,877539178 | 0,63  | 0,431022747 | 0,31  | 0,713620433 | -0,01 | 0,994986217 | 0,46  | 0,450543672 |
| Ssb    | -0,17 | 0,657124524 | -0,25 | 0,628174614 | 0,25  | 0,718286531 | 0,64  | 0,107636192 | 0,61  | 0,142592596 |
| Ssbp1  | 0,07  | 0,954349573 | 0,19  | 0,904651548 | -0,55 | 0,38818495  | -0,27 | 0,747946366 | 1,02  | 0,193796626 |
| Ssbp2  | -0,28 | 0,777335496 | -0,01 | 1           | 0,24  | 0,693217111 | -1,96 | 0,031576273 | 0,69  | 0,246316824 |
| Ssbp3  | 0,11  | 0,83892072  | -0,28 | 0,744473639 | 0,57  | 0,240110915 | 0,96  | 0,08259808  | -0,25 | 0,716979399 |
| Ssbp4  | -0,33 | 0,444864485 | -0,09 | 0,861828582 | 0,35  | 0,546286708 | -0,02 | 0,978089878 | 0,2   | 0,773401088 |
| Ssc4d  | 0,22  | 0,680794685 | -0,05 | 0,965389843 | -0,52 | 0,493682776 | 0,41  | 0,378102359 | -0,1  | 0,934185668 |
| Ssc5d  | 0,01  | 0,989017567 | -0,24 | 0,809683705 | 0,27  | 0,751090942 | 0,28  | 0,722766722 | 0,21  | 0,810821641 |
| Ssfa2  | 0,39  | 0,257546457 | 0,66  | 0,131076642 | 0,29  | 0,67329304  | -1,09 | 0,01904208  | 0,43  | 0,342250812 |
| Ssh1   | 0,44  | 0,231101726 | -0,01 | 0,996259587 | -0,02 | 0,991834178 | 0,34  | 0,585080184 | 0,24  | 0,830813323 |
| Ssh2   | -0,34 | 0,576009654 | -0,07 | 0,892916262 | 0,29  | 0,587418258 | 0,32  | 0,388065491 | -0,45 | 0,488057052 |
| Ssh3   | -0,29 | 0,803045877 | 0,15  | 0,868839934 | 0,35  | 0,660462891 | -0,17 | 0,822922136 | 0,07  | 0,952190189 |
| Ssmem1 | 0,09  | 0,926207964 | -0,26 | 0,732847182 | 0,24  | 0,628142669 | 0,31  | 0,512797637 | -0,02 | 0,983613958 |
| Ssna1  | -0,28 | 0,640236418 | -0,31 | 0,68182838  | 0,73  | 0,172712848 | 0,47  | 0,423926874 | -0,1  | 0,917075631 |
| Sspn   | -0,4  | 0,627312744 | -0,28 | 0,651363268 | 0,73  | 0,358495431 | -1,15 | 0,1764693   | -0,96 | 0,335268519 |
| Sspo   | -0,05 | 0,937546002 | 0,02  | 0,985148348 | -0,06 | 0,939590181 | 0,19  | 0,577360837 | 0,23  | 0,702993783 |
| Ssr1   | -0,37 | 0,628296708 | -0,02 | 0,991344729 | 1,36  | 0,034161362 | 0,18  | 0,850749612 | -0,34 | 0,587305934 |
| Ssr2   | -0,34 | 0,311460152 | -0,32 | 0,420826753 | 0,76  | 0,197579894 | 0,6   | 0,096403516 | -0,11 | 0,8736151   |
| Ssr3   | -0,13 | 0,813153742 | -0,2  | 0,659883931 | 0,33  | 0,594794519 | 0,7   | 0,154643227 | 0,06  | 0,948935854 |
| Ssr4   | 0,12  | 0,808379727 | -0,34 | 0,593605226 | 0,25  | 0,711135497 | -0,1  | 0,864379203 | 0,06  | 0,940438527 |
| Ssrp1  | -1,36 | 0,104092085 | -0,63 | 0,434358293 | 0,98  | 0,321560439 | 0,98  | 0,209491757 | 0,32  | 0,730951829 |
| Sssca1 | -0,24 | 0,787452068 | -0,13 | 0,849052981 | -0,18 | 0,896291411 | 0,59  | 0,42854479  | 0,31  | 0,648312151 |
| Sst    | -0,02 | 0,976314749 | 0,12  | 0,862079816 | -0,25 | 0,678840444 | -0,15 | 0,717305989 | -0,03 | 0,975441362 |
| Sstr1  | -0,24 | 0,543570731 | 0,01  | 0,997700959 | -0,33 | 0,550662565 | -0,05 | 0,952584231 | 0,05  | 0,972590168 |
| Sstr2  | 0,18  | 0,842159948 | 0,37  | 0,555979534 | -0,7  | 0,465949919 | -0,22 | 0,773887201 | 0,16  | 0,827104937 |



|            |       |             |       |             |       |             |       |             |       |             |
|------------|-------|-------------|-------|-------------|-------|-------------|-------|-------------|-------|-------------|
| Sstr3      | 0,03  | 0,967288782 | -0,16 | 0,842663656 | -0,1  | 0,927950027 | 0,31  | 0,431884865 | 0,32  | 0,62978577  |
| Sstr4      | 0,19  | 0,767083571 | -0,02 | 0,983071427 | -0,03 | 0,985093393 | -0,66 | 0,121193897 | 0,59  | 0,299240824 |
| Sstr5      | 0,17  | 0,889788892 | -0,06 | 0,957659362 | 0     | 0,999329448 | 0,16  | 0,757267334 | -0,22 | 0,757674948 |
| Ssu2       | -0,74 | 0,165137501 | -0,94 | 0,16219325  | 0,33  | 0,591217277 | -2,52 | 0,006048812 | -0,81 | 0,272406804 |
| Ssu72      | 0,02  | 0,976574175 | -0,12 | 0,877265044 | 0     | 0,999931921 | 0,4   | 0,221411237 | -0,24 | 0,655657337 |
| Ssx2ip     | -0,63 | 0,557114011 | -0,57 | 0,250902933 | 0,96  | 0,186615237 | 0,92  | 0,033468792 | 0,04  | 0,979456872 |
| Ssx9       | 0,14  | 0,885955034 | 0,07  | 0,980518468 | -0,61 | 0,60848236  | -0,5  | 0,618164093 | -0,25 | 0,84550602  |
| Ssxa1      | 0,06  | 0,946792769 | -0,03 | 0,976904127 | 0,05  | 0,953951069 | -0,02 | 0,959921588 | 0,2   | 0,776025316 |
| Ssxb1      | 0,85  | 0,339051395 | -0,95 | 0,585443341 | -0,27 | 0,698170879 | 0,75  | 0,34938668  | 0,28  | 0,801385411 |
| Ssxb10     | 0,14  | 0,835350283 | 0,34  | 0,574121139 | -0,28 | 0,625295543 | -0,17 | 0,886422917 | 0,15  | 0,86811326  |
| Ssxb2      | -0,09 | 0,921652597 | 0,14  | 0,881171171 | 0,22  | 0,665727181 | -0,06 | 0,957427513 | 0,11  | 0,912683275 |
| Ssxb3      | -0,63 | 0,40412179  | -0,24 | 0,867265251 | -0,01 | 0,996260936 | 0,55  | 0,557215591 | 0,03  | 0,979456872 |
| Ssxb5      | -0,88 | 0,293334505 | -0,02 | 0,994376785 | 0,73  | 0,379638471 | -0,12 | 0,922338609 | 0,16  | 0,913553402 |
| Ssxb6      | 0,34  | 0,631544171 | 0,38  | 0,735852142 | 0,08  | 0,927950027 | 0     | 0,997932303 | 0,66  | 0,349150128 |
| Ssxb7      | -0,14 | 0,918804282 | -0,18 | 0,853388981 | -0,32 | 0,776071062 | 0,69  | 0,151396301 | 0,24  | 0,823098095 |
| Ssxb9      | 0,05  | 0,964154899 | 0,24  | 0,678753304 | 0,05  | 0,96043738  | 0,12  | 0,868114518 | 0,12  | 0,895149377 |
| St13       | -0,14 | 0,752398295 | -0,03 | 0,981914565 | 0,04  | 0,962321429 | 0,29  | 0,483636515 | 0,14  | 0,824727805 |
| St14       | -0,56 | 0,333403216 | 0,34  | 0,762968641 | -0,2  | 0,841563482 | -1,53 | 0,022093882 | -0,18 | 0,864657678 |
| St18       | -0,2  | 0,793793954 | 0,39  | 0,702568161 | -0,11 | 0,859411859 | -0,61 | 0,40677203  | 0,26  | 0,78512653  |
| St3gal1    | 0,55  | 0,214139353 | 0,33  | 0,514781187 | -0,07 | 0,920926565 | -0,5  | 0,169538994 | 0,16  | 0,797293554 |
| St3gal2    | -0,27 | 0,720829271 | -0,6  | 0,310525594 | 0,45  | 0,607956353 | -0,17 | 0,73327254  | -0,79 | 0,418359955 |
| St3gal3    | 0,31  | 0,632053719 | -0,45 | 0,539764505 | 0,06  | 0,97041109  | 0,22  | 0,727316929 | -1,01 | 0,166595171 |
| St3gal4    | 0,8   | 0,184038495 | 0,49  | 0,247701679 | -0,51 | 0,333898672 | 1,18  | 0,033410912 | 0,84  | 0,166187239 |
| St3gal5    | -0,73 | 0,180862229 | -0,94 | 0,212039473 | 0,3   | 0,864284695 | -1,85 | 0,032693391 | -1,35 | 0,035870857 |
| St3gal6    | 0,05  | 0,952295903 | 0,11  | 0,818476671 | -0,36 | 0,527929204 | 0,22  | 0,591268629 | -0,22 | 0,715488821 |
| St5        | -0,33 | 0,586458491 | -0,5  | 0,218856242 | 0,18  | 0,854599398 | 0,26  | 0,619961752 | -0,74 | 0,240813036 |
| St6gal1    | 0,4   | 0,541134637 | -0,4  | 0,547180632 | 0,19  | 0,825963783 | 1,57  | 0,017662145 | 0,94  | 0,325920244 |
| St6gal2    | 0,07  | 0,925460743 | 0,26  | 0,628604582 | 0,23  | 0,738804472 | -0,16 | 0,783233481 | 0,04  | 0,974110019 |
| St6galnac2 | -0,39 | 0,454303869 | -0,24 | 0,803207823 | 0,46  | 0,56948206  | -2,07 | 0,078677403 | -0,73 | 0,495363692 |
| St6galnac3 | -1,75 | 0,180862229 | -1,43 | 0,261452339 | 1,14  | 0,277909635 | -2,38 | 0,017463671 | -1,27 | 0,060191534 |
| St6galnac4 | -0,22 | 0,616144081 | 0,11  | 0,849473761 | -0,12 | 0,873026373 | -0,24 | 0,507500457 | 0,19  | 0,745463091 |
| St6galnac5 | 0,34  | 0,416909288 | 0,33  | 0,680709276 | 0,08  | 0,917672398 | 0,43  | 0,360856557 | 0,59  | 0,40189401  |
| St6galnac6 | -0,89 | 0,124327015 | -0,4  | 0,594415097 | -0,01 | 0,996596939 | -0,6  | 0,346456077 | -0,92 | 0,056404855 |
| St7        | -0,92 | 0,179751021 | -0,42 | 0,641052915 | 1,1   | 0,287401098 | 0,71  | 0,427615276 | -0,72 | 0,481873486 |
| St7l       | 0,18  | 0,764288636 | 0,48  | 0,609494324 | 0,07  | 0,95106142  | -0,15 | 0,855472984 | 0,29  | 0,689780577 |

|           |       |             |       |             |       |             |       |             |       |             |
|-----------|-------|-------------|-------|-------------|-------|-------------|-------|-------------|-------|-------------|
| St8sia1   | -0,08 | 0,936542933 | 0,02  | 0,991997053 | -0,33 | 0,590619197 | -0,45 | 0,467410173 | -0,4  | 0,592460098 |
| St8sia2   | 0,07  | 0,937580579 | -0,2  | 0,854044527 | -0,29 | 0,695705149 | 0,2   | 0,805452009 | 0,18  | 0,844265172 |
| St8sia3   | -0,06 | 0,959218841 | 0,1   | 0,831580851 | -0,11 | 0,898382247 | 0,61  | 0,235695711 | 0,33  | 0,728184446 |
| St8sia3os | 0,59  | 0,189684245 | -0,11 | 0,851085879 | 0,12  | 0,920740272 | 0,28  | 0,683901621 | -0,1  | 0,914498972 |
| St8sia4   | -0,08 | 0,925510521 | 0,02  | 0,988074738 | 0,01  | 0,997220401 | 2,4   | 0,004818436 | 0,23  | 0,767310323 |
| St8sia5   | -0,25 | 0,565823399 | 0,53  | 0,457889449 | -0,28 | 0,676418104 | 0,21  | 0,6447962   | 0,32  | 0,57304314  |
| St8sia6   | -0,62 | 0,450132712 | -0,09 | 0,911519416 | 1,02  | 0,11637989  | -2,52 | 0,026495005 | -0,37 | 0,791708307 |
| Stab1     | -0,6  | 0,232588677 | -0,28 | 0,610506494 | -0,05 | 0,963221639 | 0,46  | 0,234246727 | -0,2  | 0,745958051 |
| Stab2     | 0,13  | 0,809762393 | 0,34  | 0,469147702 | -0,32 | 0,899941244 | -1,63 | 0,061549322 | -0,53 | 0,639784876 |
| Stac      | 0,12  | 0,911158473 | 0,21  | 0,832369851 | 0,47  | 0,34019912  | 0,07  | 0,947570266 | 0,22  | 0,824727805 |
| Stac2     | 0,18  | 0,84900712  | -0,68 | 0,309789903 | 0,18  | 0,873457545 | 0,2   | 0,868680052 | -0,53 | 0,657201901 |
| Stac3     | 0,47  | 0,66961506  | 1,26  | 0,231416775 | -0,12 | 0,898935616 | -0,49 | 0,690442683 | -0,24 | 0,875421436 |
| Stag1     | -0,05 | 0,971963261 | 0,2   | 0,729172466 | 0,06  | 0,950772658 | -0,71 | 0,193799    | 0,4   | 0,525018839 |
| Stag2     | -0,09 | 0,923075384 | 0,32  | 0,646613262 | 0,18  | 0,803991783 | -0,55 | 0,426488138 | -0,03 | 0,978981442 |
| Stag3     | 0,17  | 0,816922106 | -0,07 | 0,966717367 | 0,03  | 0,973802765 | 0     | 0,999224513 | -0,05 | 0,968130547 |
| Stam      | 0,18  | 0,838825457 | 0,3   | 0,499573414 | 0,36  | 0,755403453 | 0,19  | 0,798001113 | 0,23  | 0,794001669 |
| Stam2     | 0,22  | 0,711787423 | 0,25  | 0,703255839 | 0,31  | 0,601444701 | 0,43  | 0,310147991 | -0,06 | 0,958259949 |
| Stambp    | 0,06  | 0,929923958 | -0,08 | 0,947986685 | 0,63  | 0,599127793 | 0,3   | 0,821383017 | 0,47  | 0,719285827 |
| Stambpl1  | -0,89 | 0,316556547 | -0,6  | 0,49599855  | 0,85  | 0,15883036  | 1,09  | 0,078332465 | 0,01  | 0,994774512 |
| Stamos    | 0,41  | 0,548198    | -0,08 | 0,94347698  | -0,01 | 0,994420875 | 0,35  | 0,549014569 | 0,82  | 0,267677873 |
| Stap1     | 0     | 0,996219097 | -0,08 | 0,929634547 | -0,45 | 0,443039118 | 0,17  | 0,807101657 | 0,01  | 0,992370267 |
| Stap2     | -0,11 | 0,803557792 | -0,4  | 0,486118041 | 0,12  | 0,859517858 | 0,64  | 0,254277722 | -0,04 | 0,974447247 |
| Star      | -0,26 | 0,794571383 | -0,41 | 0,756778611 | 0,24  | 0,806955133 | 0,08  | 0,925391737 | 0,26  | 0,736229974 |
| Stard10   | -0,17 | 0,827173298 | 0,22  | 0,868234125 | 0,55  | 0,548288344 | -1,36 | 0,03032597  | -0,31 | 0,750359224 |
| Stard13   | 0     | 0,999288019 | 0,46  | 0,505089058 | -0,3  | 0,625253599 | 0,32  | 0,451614744 | -0,48 | 0,349150128 |
| Stard3    | 0,25  | 0,764957267 | 0,11  | 0,880259895 | -0,42 | 0,562334029 | 0,39  | 0,422600163 | 0,22  | 0,755507817 |
| Stard3nl  | 0,72  | 0,263583519 | -0,37 | 0,51825831  | -0,16 | 0,841563482 | 0,65  | 0,169955811 | -0,11 | 0,91339829  |
| Stard4    | -0,48 | 0,46877337  | -0,49 | 0,517288934 | 0,48  | 0,492069074 | 1,52  | 0,090583584 | 0,39  | 0,654148631 |
| Stard5    | 0,52  | 0,24508813  | 0,71  | 0,339372592 | -0,31 | 0,811779267 | 0,1   | 0,793027389 | 0,5   | 0,352110675 |
| Stard6    | 0,38  | 0,454505799 | -0,18 | 0,839283725 | -0,79 | 0,326707568 | 0,28  | 0,592457782 | -0,44 | 0,508751714 |
| Stard7    | -0,46 | 0,328021998 | -0,2  | 0,864680059 | 0,4   | 0,789768168 | -0,3  | 0,762935413 | -0,38 | 0,699964258 |
| Stard8    | -0,12 | 0,853439426 | -0,01 | 0,997700959 | -0,14 | 0,808747196 | -1,45 | 0,033468792 | -0,28 | 0,677222415 |
| Stard9    | -0,26 | 0,70854652  | 0,04  | 0,958545812 | -0,1  | 0,935190533 | -1,24 | 0,035685356 | -0,52 | 0,312896561 |
| Stat1     | 0,79  | 0,496123406 | 0,67  | 0,153524445 | -2,25 | 0,002978188 | 1,37  | 0,037302258 | 2,2   | 0,003940056 |
| Stat2     | 0,67  | 0,347969299 | 0,71  | 0,149865451 | -1,16 | 0,101949467 | -0,33 | 0,502210241 | 0,87  | 0,101473525 |

|         |       |             |       |             |       |             |       |             |       |             |
|---------|-------|-------------|-------|-------------|-------|-------------|-------|-------------|-------|-------------|
| Stat3   | 0,32  | 0,423859346 | 0,34  | 0,390751508 | -0,41 | 0,406359307 | -0,32 | 0,288784022 | 0,36  | 0,431894609 |
| Stat4   | -0,39 | 0,78682706  | -0,07 | 0,971801869 | 0,03  | 0,989772079 | -0,93 | 0,126136576 | -0,44 | 0,814438115 |
| Stat5a  | 0,27  | 0,575894977 | -0,02 | 0,969481475 | -0,31 | 0,721952929 | 0     | 0,996074006 | 0,02  | 0,984065984 |
| Stat5b  | -0,02 | 0,981777139 | 0,69  | 0,153049551 | -1,07 | 0,204247489 | -0,1  | 0,778212842 | 0,04  | 0,960000999 |
| Stat6   | 0,22  | 0,586458491 | 0,33  | 0,3653327   | -0,47 | 0,356121983 | 0,01  | 0,996714438 | 0,28  | 0,814394495 |
| Stau1   | -0,07 | 0,891730562 | 0,28  | 0,461920054 | -0,09 | 0,926982123 | -0,27 | 0,476414891 | -0,03 | 0,977791401 |
| Stau2   | -0,07 | 0,948291116 | -0,47 | 0,712500402 | 0,17  | 0,9122363   | 0,37  | 0,661579252 | -0,58 | 0,268016026 |
| Stbd1   | 0,21  | 0,800851935 | 0,2   | 0,782712411 | 0,76  | 0,166067688 | -1,55 | 0,1379799   | 0,22  | 0,823098095 |
| Stc1    | 0,69  | 0,184775719 | 0,59  | 0,213265335 | -0,1  | 0,936106999 | 1,61  | 0,02663501  | 0,04  | 0,970631145 |
| Stc2    | -0,08 | 0,93115708  | -0,27 | 0,842793123 | 0,69  | 0,401582612 | 0,49  | 0,427171447 | 0,14  | 0,894741611 |
| Steap1  | 1,45  | 0,222236104 | 1,23  | 0,0802723   | -0,4  | 0,830514771 | 1,56  | 0,045154322 | 0,53  | 0,406605038 |
| Steap2  | 1,74  | 0,239601221 | 1,76  | 0,279092572 | 0,81  | 0,226526555 | 1,4   | 0,287840988 | 0,37  | 0,661640717 |
| Steap3  | -0,47 | 0,455714377 | -0,73 | 0,508633526 | 1,27  | 0,13265466  | 0,16  | 0,774826947 | -0,15 | 0,868167014 |
| Steap4  | 0,36  | 0,7761658   | 0,44  | 0,750325684 | -0,71 | 0,499417366 | 1,11  | 0,298021209 | -0,28 | 0,832848337 |
| Stfa1   | 2,37  | 0,016666769 | 0,62  | 0,373555617 | -0,49 | 0,667037569 | 1,09  | 0,052722715 | 0,63  | 0,456980829 |
| Stfa2   | 0,09  | 0,934802231 | -0,56 | 0,44688209  | -0,44 | 0,679637065 | 0,37  | 0,665208114 | -0,18 | 0,881968395 |
| Stfa211 | 0,37  | 0,484535687 | 0,33  | 0,688450928 | 0,44  | 0,868054401 | 0,15  | 0,792979476 | 0,43  | 0,555315018 |
| Stfa3   | 0,27  | 0,66331039  | 0,46  | 0,714236324 | 0,22  | 0,800565527 | -0,06 | 0,944354166 | -0,09 | 0,920710557 |
| Stil    | -1,58 | 0,107441594 | -1,97 | 0,109267475 | 1,72  | 0,076696168 | 3,52  | 0,005494861 | -0,05 | 0,962820357 |
| Stim1   | -0,32 | 0,591692068 | -0,08 | 0,878725004 | 0,4   | 0,695026856 | 0,49  | 0,294345732 | -0,5  | 0,417370658 |
| Stim2   | -0,03 | 0,96153339  | 0     | 1           | 0,61  | 0,342213912 | 0,15  | 0,866063732 | 0,38  | 0,619885789 |
| Stip1   | 0,08  | 0,886876138 | 0,04  | 0,961370411 | 0,2   | 0,756666895 | 0,4   | 0,619134782 | 0,2   | 0,873357312 |
| Stk10   | -0,82 | 0,092850129 | -0,69 | 0,158696948 | 0,78  | 0,206163051 | -0,09 | 0,790404829 | -0,68 | 0,197981483 |
| Stk11   | -0,01 | 0,98659023  | -0,2  | 0,786190103 | -0,39 | 0,464639399 | -0,15 | 0,881829784 | -0,09 | 0,939448119 |
| Stk11ip | -0,16 | 0,757032046 | -0,83 | 0,090262898 | -0,04 | 0,962216849 | -0,07 | 0,923980964 | -0,77 | 0,329423825 |
| Stk16   | -0,05 | 0,914090929 | -0,16 | 0,841184864 | -0,19 | 0,745724322 | 0,2   | 0,669457175 | -0,04 | 0,975986697 |
| Stk17b  | 0,16  | 0,764824121 | 0,08  | 0,960594252 | 0,32  | 0,791940256 | 0,18  | 0,899413504 | 0,77  | 0,56717021  |
| Stk19   | 0,51  | 0,269151748 | 0,89  | 0,104392193 | -0,4  | 0,369527192 | -0,19 | 0,601151158 | 0,46  | 0,392467342 |
| Stk24   | 0,15  | 0,775296013 | 0,1   | 0,937377463 | 0,08  | 0,923258105 | -0,1  | 0,925049552 | -0,18 | 0,865258929 |
| Stk25   | -0,48 | 0,215251359 | -0,12 | 0,858935338 | 0,23  | 0,647988621 | 0,32  | 0,389207462 | -0,34 | 0,587735967 |
| Stk26   | 0,31  | 0,738714467 | -0,01 | 0,995709562 | -0,45 | 0,467927813 | 0,03  | 0,981610833 | 0,24  | 0,889613878 |
| Stk3    | 0,2   | 0,700094318 | 0,24  | 0,742730285 | 0,06  | 0,944078985 | 0,73  | 0,261593182 | 0,33  | 0,679993881 |
| Stk31   | 0,25  | 0,686076441 | 0,29  | 0,825210924 | -0,3  | 0,711793051 | 0,1   | 0,92678264  | 0,31  | 0,788546035 |
| Stk32a  | 0,35  | 0,453061353 | -0,29 | 0,796206036 | 0,11  | 0,906552276 | -0,61 | 0,690659674 | 0,07  | 0,982813638 |
| Stk32b  | 0,24  | 0,793209485 | 0,35  | 0,505089058 | 0,38  | 0,715407764 | -0,24 | 0,70800461  | 0,26  | 0,747614877 |

|           |       |             |       |             |       |             |       |             |       |             |
|-----------|-------|-------------|-------|-------------|-------|-------------|-------|-------------|-------|-------------|
| Stk32c    | 0,26  | 0,757499328 | 0,94  | 0,326531488 | -0,04 | 0,970913247 | -0,85 | 0,266021355 | 0,09  | 0,948163009 |
| Stk33     | 0,09  | 0,928770547 | -0,1  | 0,932292974 | -0,04 | 0,976092199 | -0,04 | 0,966334592 | 0,59  | 0,32673984  |
| Stk35     | -0,77 | 0,357553901 | -0,09 | 0,880892852 | 0,21  | 0,879141223 | 0,42  | 0,575297022 | 0,2   | 0,846526184 |
| Stk36     | 0,48  | 0,335253487 | 0,39  | 0,805949528 | -0,29 | 0,715497532 | 0,18  | 0,748929665 | 0,05  | 0,959398085 |
| Stk38     | -0,33 | 0,399464155 | 0,07  | 0,958187617 | -0,35 | 0,570568062 | -0,36 | 0,716994919 | 0,08  | 0,957467544 |
| Stk38l    | -0,22 | 0,841584453 | 1,55  | 0,121458348 | 0,49  | 0,568619313 | -1,81 | 0,016453475 | 0,59  | 0,32029895  |
| Stk39     | 0,55  | 0,389268664 | 0,68  | 0,214941361 | 0,75  | 0,370399672 | 0,76  | 0,073035707 | -0,02 | 0,980961333 |
| Stk4      | -0,1  | 0,90742841  | -0,07 | 0,929289366 | 0,09  | 0,915321116 | -0,55 | 0,188497007 | -0,3  | 0,697757911 |
| Stk40     | -0,4  | 0,329577496 | -0,14 | 0,879707211 | -0,01 | 0,99394877  | -0,11 | 0,795238169 | -0,51 | 0,267077511 |
| Stkld1    | -0,09 | 0,914090929 | 0,34  | 0,803283255 | 0,04  | 0,963357998 | -0,1  | 0,923775458 | -0,14 | 0,885318142 |
| Stmn1     | -0,93 | 0,138092806 | -0,91 | 0,152062404 | 1,32  | 0,036818657 | 1,82  | 0,028543744 | 0,5   | 0,469997945 |
| Stmn1-rs1 | 0,18  | 0,721797378 | 0,35  | 0,621330557 | 0,11  | 0,882540073 | -0,09 | 0,856170245 | 0,27  | 0,722556176 |
| Stmn2     | -0,95 | 0,154509914 | -0,08 | 0,87892334  | 0,39  | 0,481896699 | -2,28 | 0,003907268 | -0,88 | 0,142592596 |
| Stmn3     | 0,07  | 0,928544937 | 0,6   | 0,230688117 | -0,5  | 0,325754352 | -0,19 | 0,639812879 | -0,36 | 0,502522199 |
| Stmn4     | 0,21  | 0,782823969 | 0,56  | 0,439108392 | 0,1   | 0,90672161  | 0,28  | 0,713260063 | 0,06  | 0,97206128  |
| Stmnd1    | 0,13  | 0,860432757 | 0,02  | 0,994827472 | 0,2   | 0,830355655 | 0,61  | 0,441112475 | 0,19  | 0,865258929 |
| Stom      | 1,37  | 0,05571259  | 1,12  | 0,080612373 | -1,61 | 0,03244077  | -0,48 | 0,150463702 | 0,41  | 0,391102296 |
| Stoml1    | 0,79  | 0,129299808 | 0,84  | 0,297047741 | -0,43 | 0,676418104 | -1,13 | 0,112264739 | 0,25  | 0,750504485 |
| Stoml2    | -0,74 | 0,214139353 | -0,62 | 0,363349607 | 0,4   | 0,533023142 | 0,93  | 0,102207067 | -0,08 | 0,951471487 |
| Stoml3    | 0,26  | 0,64866902  | 0,06  | 0,925843899 | 0,2   | 0,781545738 | -0,13 | 0,845785501 | -0,01 | 0,9939542   |
| Ston1     | -0,35 | 0,698332739 | -0,29 | 0,686540452 | -0,13 | 0,83442082  | -0,88 | 0,098577249 | -0,72 | 0,272986942 |
| Ston2     | 0,83  | 0,546019769 | -0,19 | 0,880892852 | 0,07  | 0,975705913 | -1,55 | 0,078120606 | 0,36  | 0,727637428 |
| Stox1     | -0,32 | 0,630558551 | 0,01  | 0,998778009 | -0,28 | 0,772098345 | -0,22 | 0,8214961   | 0,46  | 0,510444912 |
| Stox2     | 0,27  | 0,762798673 | -0,06 | 0,96630649  | -0,77 | 0,542385406 | -0,08 | 0,924534789 | -0,32 | 0,829444633 |
| Stpg1     | -0,16 | 0,803337362 | -0,05 | 0,936792848 | 0,04  | 0,970939073 | -0,89 | 0,069060458 | -0,96 | 0,083660756 |
| Stpg2     | -0,01 | 0,983807636 | -0,05 | 0,966078321 | 0,14  | 0,877598693 | -0,06 | 0,904622977 | -0,24 | 0,706875815 |
| Stra13    | -0,72 | 0,457217612 | 0,55  | 0,535950767 | -0,72 | 0,377624172 | -1,46 | 0,081030036 | -0,7  | 0,373699539 |
| Stra6     | 0     | 0,996219097 | -0,03 | 0,970437908 | 0,1   | 0,910636006 | -0,01 | 0,987316384 | 0,1   | 0,935793128 |
| Stra6l    | 0,62  | 0,400171261 | 0,03  | 0,972706967 | -0,22 | 0,736555563 | 0,19  | 0,782526829 | 0,29  | 0,697757911 |
| Stra8     | -0,2  | 0,795286609 | -0,28 | 0,732044571 | -0,3  | 0,674333474 | 0,38  | 0,427171447 | -0,15 | 0,830889529 |
| Strada    | -0,45 | 0,520667704 | 0,07  | 0,973459105 | 0,83  | 0,321560439 | 0,4   | 0,721657141 | 0,39  | 0,735192953 |
| Stradb    | -0,59 | 0,480396246 | 0     | 1           | 0,11  | 0,885042765 | 0,13  | 0,912193677 | -0,4  | 0,697757911 |
| Strap     | -0,48 | 0,531771765 | -0,08 | 0,896707162 | 0,1   | 0,921956183 | 0,45  | 0,34148095  | 0,14  | 0,885777129 |
| Strbp     | -0,8  | 0,486330326 | -0,49 | 0,438536941 | 0,51  | 0,717856288 | 0,01  | 0,995921616 | -0,27 | 0,720312918 |
| Strc      | 0,02  | 0,969486005 | -0,23 | 0,775155136 | -0,84 | 0,114529044 | 0,43  | 0,351428925 | 0,03  | 0,978981442 |

|           |       |             |       |             |       |             |       |             |       |             |
|-----------|-------|-------------|-------|-------------|-------|-------------|-------|-------------|-------|-------------|
| Strip1    | -0,31 | 0,567937252 | -0,24 | 0,754916783 | 0,04  | 0,957552304 | 0,72  | 0,262386327 | 0,35  | 0,712121015 |
| Strip2    | -0,74 | 0,236944071 | -0,15 | 0,832460257 | -0,27 | 0,860939872 | 0,3   | 0,603611964 | -0,17 | 0,879418817 |
| Strn      | -0,19 | 0,722763958 | -0,37 | 0,651587568 | 0,38  | 0,610261791 | 0,4   | 0,455883516 | -0,5  | 0,313938752 |
| Strn3     | -0,29 | 0,611774824 | 0,22  | 0,857874036 | 0,88  | 0,259550802 | -0,08 | 0,943508556 | 0,29  | 0,723591535 |
| Strn4     | -0,7  | 0,111835724 | -0,1  | 0,877660987 | -0,21 | 0,726841125 | 0,04  | 0,943143586 | -0,66 | 0,254886057 |
| Sts       | 0,06  | 0,892823025 | -0,06 | 0,900801202 | -0,12 | 0,85833551  | 0,01  | 0,994376209 | -0,02 | 0,981206514 |
| Stt3a     | -0,29 | 0,655006949 | -0,3  | 0,512135467 | 1     | 0,124700416 | 0,58  | 0,220968309 | -0,16 | 0,822398711 |
| Stt3b     | -0,2  | 0,703606438 | 0,43  | 0,434358293 | -0,11 | 0,941627748 | -0,24 | 0,700431952 | -0,25 | 0,760657649 |
| Stub1     | -0,24 | 0,665625405 | -0,3  | 0,524552054 | 0,5   | 0,387068715 | 0,11  | 0,768817161 | 0,06  | 0,939948423 |
| Stx11     | 0,61  | 0,277692472 | 0,41  | 0,44688209  | 0,23  | 0,80210446  | 0,28  | 0,48505774  | 1,12  | 0,042920116 |
| Stx12     | -0,67 | 0,268112899 | 0,12  | 0,902790107 | -0,01 | 0,994420875 | -0,01 | 0,983166423 | 0,11  | 0,915238726 |
| Stx16     | 0,09  | 0,875890831 | -0,11 | 0,80350104  | -0,27 | 0,616401441 | 0,02  | 0,981203009 | -0,01 | 0,991628025 |
| Stx17     | -0,03 | 0,984040323 | -0,09 | 0,904467069 | 0,17  | 0,777417583 | 0,31  | 0,669326407 | 0,33  | 0,72393858  |
| Stx18     | -0,03 | 0,976855185 | -0,04 | 0,96095671  | 0,07  | 0,948161279 | 0,12  | 0,861506076 | -0,26 | 0,753328965 |
| Stx19     | -0,21 | 0,640223012 | -0,05 | 0,92640054  | 0,09  | 0,898190421 | -0,23 | 0,581624426 | -0,22 | 0,739851808 |
| Stx1a     | 0,13  | 0,84241758  | -0,45 | 0,530207532 | 0,53  | 0,383161457 | 0,52  | 0,19937858  | -0,06 | 0,957830821 |
| Stx1b     | 0,04  | 0,950532575 | -0,18 | 0,745921616 | -0,52 | 0,602775092 | -0,77 | 0,058319082 | 0,78  | 0,316076554 |
| Stx2      | -0,2  | 0,657723995 | 0,12  | 0,882847123 | -0,11 | 0,894229514 | -0,02 | 0,986773564 | 0,04  | 0,974805793 |
| Stx3      | -0,06 | 0,975506993 | 0,27  | 0,850001559 | 0,74  | 0,406359307 | -0,68 | 0,441112475 | 0,68  | 0,482921656 |
| Stx4a     | -0,28 | 0,534017117 | 0,1   | 0,839789639 | 0,3   | 0,617592492 | -0,01 | 0,991962381 | 0,14  | 0,890760783 |
| Stx5a     | 0,16  | 0,717407143 | -0,01 | 0,989873399 | 0,15  | 0,770526999 | 0,27  | 0,482483122 | 0,13  | 0,868037689 |
| Stx6      | 0,07  | 0,902710357 | 0,05  | 0,958974534 | -0,01 | 0,993231654 | 1,45  | 0,076348362 | -0,14 | 0,877711678 |
| Stx7      | 0,25  | 0,549743877 | 0,33  | 0,630199793 | -0,04 | 0,970398561 | -0,21 | 0,732709733 | 0,58  | 0,328821044 |
| Stx8      | 0,74  | 0,179001759 | 0,08  | 0,966719807 | -0,61 | 0,602775092 | -0,21 | 0,671991774 | 0,09  | 0,905581898 |
| Stxbp1    | -0,33 | 0,546026761 | 0,02  | 0,983544409 | 0,02  | 0,991451381 | -0,08 | 0,87148686  | 0,24  | 0,754099916 |
| Stxbp2    | -0,4  | 0,484460084 | 0,15  | 0,831580851 | 0,38  | 0,700186861 | -0,17 | 0,689752155 | 0,11  | 0,901174282 |
| Stxbp3    | 0,27  | 0,459857102 | 0,17  | 0,792617844 | -0,17 | 0,777417583 | -0,1  | 0,90529096  | 0,65  | 0,35853581  |
| Stxbp3-ps | 0,03  | 0,959985598 | 0,21  | 0,853458666 | -0,25 | 0,761599136 | -0,32 | 0,316055884 | 0,21  | 0,721620565 |
| Stxbp4    | 0,04  | 0,978542552 | -0,67 | 0,328485456 | 0,28  | 0,628315093 | -0,02 | 0,992906132 | -0,98 | 0,502000063 |
| Stxbp5    | 0,82  | 0,132779189 | 0,72  | 0,203321969 | -1,8  | 0,002978188 | 0,6   | 0,11470548  | 1,72  | 0,003984113 |
| Stxbp5l   | -0,01 | 0,992748202 | -0,1  | 0,877602011 | -0,23 | 0,747950844 | -0,01 | 0,994740586 | -0,07 | 0,952718905 |
| Stxbp6    | -0,04 | 0,971245076 | 0,03  | 0,966309714 | -0,09 | 0,948637233 | -1,84 | 0,066524162 | -0,4  | 0,757342197 |
| Styk1     | 0,36  | 0,617280733 | -0,19 | 0,829923566 | 0,58  | 0,35431494  | 0,75  | 0,161448886 | 0,28  | 0,837746808 |
| Styx      | -0,03 | 0,971922167 | -0,08 | 0,954307545 | 0,65  | 0,371125662 | 0,25  | 0,610314614 | -0,12 | 0,88282824  |
| Styxl1    | -0,1  | 0,936139343 | -0,12 | 0,804868131 | 0,28  | 0,61190379  | 0,09  | 0,812468015 | 0,07  | 0,936333982 |

|         |       |             |       |             |       |             |       |             |       |             |
|---------|-------|-------------|-------|-------------|-------|-------------|-------|-------------|-------|-------------|
| Sub1    | 0,08  | 0,864474622 | -0,07 | 0,88928164  | 0,33  | 0,598179126 | 0,62  | 0,088393639 | 0,1   | 0,892933968 |
| Sucla2  | -0,06 | 0,921898929 | -0,37 | 0,667038533 | 0,48  | 0,595253534 | -0,17 | 0,820218577 | -0,29 | 0,647876293 |
| Suclg1  | -0,62 | 0,172698611 | -0,41 | 0,605851161 | 0,36  | 0,737821076 | 0,44  | 0,295194175 | -0,28 | 0,675958562 |
| Suclg2  | 0,28  | 0,625573018 | 0,13  | 0,894022563 | -0,11 | 0,922318683 | -0,04 | 0,943143586 | -0,14 | 0,890957032 |
| Sucnr1  | -0,22 | 0,575887113 | -0,15 | 0,775155136 | -0,02 | 0,987270694 | 0,33  | 0,603471344 | -0,12 | 0,892386863 |
| Suco    | 0,14  | 0,829889828 | 0,65  | 0,181636532 | 0,06  | 0,943788892 | 0,65  | 0,64165168  | 0,7   | 0,608004947 |
| Suds3   | -0,14 | 0,807062435 | -0,15 | 0,697354745 | 0,02  | 0,990836784 | 0,62  | 0,547560357 | -0,01 | 0,992607235 |
| Sufu    | -0,57 | 0,222262142 | 0,33  | 0,707806354 | 0,25  | 0,724675525 | -0,26 | 0,779547737 | -0,7  | 0,311906172 |
| Sugct   | 0,28  | 0,808947569 | -0,26 | 0,85199963  | 0,03  | 0,986912078 | 0,1   | 0,917846549 | 0,41  | 0,846003361 |
| Sugp1   | -0,03 | 0,964086001 | 0,08  | 0,861650712 | 0,2   | 0,720069267 | -0,11 | 0,813465331 | 0,09  | 0,917075631 |
| Sugp2   | -0,31 | 0,70453516  | -0,08 | 0,934280572 | 0,6   | 0,391889599 | 0,09  | 0,928203787 | 0,25  | 0,791164832 |
| Sugt1   | 0,05  | 0,925510521 | -0,03 | 0,965589332 | -0,22 | 0,8315526   | 0,22  | 0,612464969 | 0,23  | 0,684349871 |
| Sulf1   | -0,33 | 0,772855197 | 0,21  | 0,811472247 | 0,2   | 0,904057901 | -0,86 | 0,246627022 | -0,68 | 0,338653241 |
| Sulf2   | -0,41 | 0,369418071 | -0,47 | 0,677713323 | -0,5  | 0,636722042 | -4,02 | 0,003009221 | 0,74  | 0,158709655 |
| Sult1a1 | 0,15  | 0,846447446 | 0,46  | 0,776548278 | -0,51 | 0,566535877 | -2,66 | 0,005499003 | -0,91 | 0,067602527 |
| Sult1b1 | -0,14 | 0,824044892 | -0,28 | 0,613344994 | 0,16  | 0,760930184 | 0,67  | 0,21580459  | 0,15  | 0,905581898 |
| Sult1c1 | -0,36 | 0,692490424 | -0,04 | 0,948411715 | -0,15 | 0,86101526  | -0,09 | 0,909873635 | -0,77 | 0,271713687 |
| Sult1c2 | -0,48 | 0,341853862 | -0,01 | 1           | 0,22  | 0,714557578 | -0,1  | 0,952133471 | -0,08 | 0,97425848  |
| Sult1d1 | -0,19 | 0,751237683 | -0,08 | 0,918400751 | -0,13 | 0,846458227 | -1,42 | 0,093705991 | 0,63  | 0,765419939 |
| Sult1e1 | -0,41 | 0,523556522 | 0,14  | 0,812664394 | 0,32  | 0,727548313 | -0,35 | 0,749218641 | -0,46 | 0,439301508 |
| Sult2a1 | -0,41 | 0,509815996 | 0,15  | 0,829923566 | -0,22 | 0,703647945 | 0,27  | 0,522230981 | 0,06  | 0,948163009 |
| Sult2a2 | 0,15  | 0,751956408 | -0,05 | 0,966436684 | -0,17 | 0,803439784 | 0,12  | 0,789717483 | -0,01 | 0,991977803 |
| Sult2a4 | 0,26  | 0,820023436 | 0,09  | 0,916489725 | -0,12 | 0,92422034  | -0,16 | 0,904971257 | -0,08 | 0,96216784  |
| Sult2a5 | -0,02 | 0,982213914 | 0     | 1           | -0,27 | 0,695306228 | 0,14  | 0,832150002 | 0,31  | 0,692027506 |
| Sult2a6 | 0,11  | 0,875582483 | 0,02  | 0,991732136 | 0,06  | 0,938795886 | -0,02 | 0,979088341 | 0,26  | 0,819072786 |
| Sult2a7 | -0,03 | 0,966775766 | -0,3  | 0,574304911 | -0,23 | 0,712697139 | -0,14 | 0,893609448 | 0,02  | 0,987948597 |
| Sult2a8 | -0,17 | 0,757032046 | 0,19  | 0,817110093 | -0,15 | 0,803439784 | -0,16 | 0,676714351 | -0,06 | 0,948335766 |
| Sult2b1 | -0,06 | 0,939317944 | 0,25  | 0,786394409 | 0,93  | 0,161469949 | -1,55 | 0,044115677 | -0,92 | 0,131482799 |
| Sult3a1 | -0,04 | 0,966775766 | 0,07  | 0,912394814 | -0,31 | 0,518319423 | -0,59 | 0,134275521 | -0,06 | 0,939948423 |
| Sult4a1 | -0,26 | 0,54401985  | -0,52 | 0,490814009 | -0,03 | 0,986912078 | 0,46  | 0,261354453 | 0,22  | 0,768768194 |
| Sult5a1 | -0,05 | 0,971922167 | -0,09 | 0,922058797 | -0,48 | 0,371125662 | 0,1   | 0,892186579 | -0,59 | 0,462558109 |
| Sult6b1 | 0,16  | 0,796294821 | 0,12  | 0,864989815 | 0,02  | 0,982986763 | -0,15 | 0,764713693 | 0,08  | 0,918897359 |
| Sumf1   | -0,14 | 0,859044359 | -0,11 | 0,872911699 | -0,32 | 0,748973263 | 0,24  | 0,715243994 | 0,34  | 0,662208123 |
| Sumf2   | 0,17  | 0,717662731 | 0,11  | 0,882589938 | -0,71 | 0,156156107 | -0,11 | 0,886806548 | -0,49 | 0,511034373 |
| Sumo1   | -0,1  | 0,877498793 | 0,01  | 0,997207127 | 0,45  | 0,700975611 | 0,45  | 0,358502795 | 0,2   | 0,788112596 |

|          |       |             |       |             |       |             |       |             |       |             |
|----------|-------|-------------|-------|-------------|-------|-------------|-------|-------------|-------|-------------|
| Sumo2    | -0,17 | 0,680520303 | -0,13 | 0,846178982 | -0,17 | 0,837273663 | 0,41  | 0,321541431 | 0,18  | 0,763240477 |
| Sumo3    | -0,21 | 0,648730873 | -0,25 | 0,540495893 | -0,06 | 0,967767582 | -0,12 | 0,723887166 | -0,23 | 0,654022675 |
| Sun1     | -0,42 | 0,362012674 | -0,61 | 0,18192694  | 0,22  | 0,674457491 | -1,35 | 0,018597004 | -0,3  | 0,604527903 |
| Sun2     | -0,46 | 0,354912365 | 0,13  | 0,913393253 | 0,45  | 0,497205965 | -0,27 | 0,575492019 | -0,02 | 0,98855352  |
| Sun3     | 0,24  | 0,806353432 | 0,02  | 0,994148616 | -0,16 | 0,825782434 | -0,27 | 0,612224887 | -0,07 | 0,951429597 |
| Sun5     | -0,06 | 0,944969851 | -0,42 | 0,359450941 | -0,19 | 0,824279952 | 0,76  | 0,296784007 | 0,54  | 0,541434584 |
| Suox     | -0,34 | 0,462016742 | -0,01 | 0,994802028 | 0,09  | 0,950862176 | -1,1  | 0,05133893  | -0,25 | 0,726687847 |
| Supt16   | -0,4  | 0,578185633 | -0,46 | 0,648367629 | 0,98  | 0,037381207 | 0,54  | 0,595625902 | -0,01 | 0,992406971 |
| Supt20   | -0,1  | 0,919567534 | 0,24  | 0,671319666 | -0,34 | 0,678840444 | -0,36 | 0,728155097 | -0,24 | 0,85508146  |
| Supt3    | -0,05 | 0,96311249  | -0,49 | 0,680709276 | 0,97  | 0,153175442 | 0,72  | 0,241162703 | 0,06  | 0,958113093 |
| Supt4a   | -0,22 | 0,741907626 | 0,18  | 0,732044571 | -0,01 | 0,997220401 | -0,12 | 0,841354324 | 0,17  | 0,82840392  |
| Supt4b   | -0,35 | 0,407100201 | 0,13  | 0,855632384 | 0,07  | 0,938864861 | 0,2   | 0,527350151 | 0,27  | 0,608004947 |
| Supt5    | -0,5  | 0,189644465 | -0,07 | 0,890813406 | 0,2   | 0,806044178 | 0,06  | 0,942739047 | -0,42 | 0,574285481 |
| Supt6    | -0,12 | 0,833851407 | -0,09 | 0,853306685 | 0,05  | 0,952888594 | -0,14 | 0,726953267 | -0,01 | 0,992022739 |
| Supt7l   | 0,01  | 0,990894139 | -0,1  | 0,903224505 | 0,36  | 0,712697139 | 0,38  | 0,71459805  | -0,1  | 0,94946865  |
| Supv3l1  | -0,23 | 0,797113928 | -0,32 | 0,482418048 | 0,53  | 0,576939208 | 0,94  | 0,341092706 | 0,07  | 0,969681536 |
| Surf1    | 0,58  | 0,435727378 | 0,16  | 0,855607772 | 0,02  | 0,990836784 | -1,34 | 0,019624978 | -0,34 | 0,521776411 |
| Surf2    | 0,18  | 0,8474836   | -0,04 | 0,942410245 | -0,04 | 0,965775869 | -0,47 | 0,270511921 | -0,2  | 0,799638391 |
| Surf4    | -0,15 | 0,778869381 | 0,07  | 0,918167746 | 0,23  | 0,809137779 | 1,25  | 0,012175785 | 0,47  | 0,389664866 |
| Surf6    | 0,12  | 0,867243066 | -0,38 | 0,603318326 | 0,07  | 0,946810097 | -0,04 | 0,95852873  | -0,37 | 0,628728585 |
| Susd1    | 0,36  | 0,63303446  | -0,5  | 0,294241321 | 0,12  | 0,855523214 | -1,09 | 0,193387685 | -0,12 | 0,935289427 |
| Susd2    | -0,04 | 0,98297164  | -0,36 | 0,852461907 | 0,7   | 0,399470425 | -0,03 | 0,988205241 | -0,34 | 0,840531579 |
| Susd3    | -0,11 | 0,852363306 | 0,07  | 0,89034555  | 0,2   | 0,763233047 | -0,01 | 0,986768223 | -0,07 | 0,942990206 |
| Susd4    | -0,65 | 0,339065946 | 0,38  | 0,383504117 | 0,22  | 0,798107953 | -1,13 | 0,093705991 | -0,65 | 0,54819971  |
| Susd5    | -0,01 | 0,989784447 | -0,18 | 0,807175471 | -0,08 | 0,923781798 | 0,06  | 0,932800758 | -0,03 | 0,976743304 |
| Susd6    | 0,04  | 0,972112267 | 0,27  | 0,654719935 | -0,51 | 0,398389729 | 0,61  | 0,148614136 | 0,21  | 0,734821787 |
| Suv39h1  | -0,51 | 0,22137005  | -0,04 | 0,977204386 | 0,54  | 0,509774432 | 0,38  | 0,783528833 | 0,48  | 0,694308779 |
| Suv39h2  | -0,43 | 0,532948347 | -1,27 | 0,333138474 | 0,68  | 0,329525512 | 1,21  | 0,046206622 | -0,15 | 0,938464659 |
| Suv420h1 | 0,23  | 0,655130976 | 0,27  | 0,694728666 | -0,15 | 0,920128463 | -0,64 | 0,215551139 | -0,02 | 0,98653183  |
| Suv420h2 | -0,22 | 0,754109937 | 0,13  | 0,946885634 | 0,63  | 0,372507295 | 0,23  | 0,818711104 | -0,54 | 0,499998316 |
| Suz12    | 0,12  | 0,914554423 | 0,38  | 0,593605226 | 0,29  | 0,638614862 | 0,1   | 0,875371281 | 0,51  | 0,450543672 |
| Sv2a     | -0,1  | 0,839375532 | 0,11  | 0,857408462 | -0,15 | 0,81820534  | -0,11 | 0,869148815 | 0,19  | 0,832578789 |
| Sv2b     | -0,11 | 0,859600103 | -0,3  | 0,689457783 | -0,25 | 0,636121785 | 0,59  | 0,518487814 | 0,47  | 0,637639125 |
| Sv2c     | 0,07  | 0,904633081 | -0,53 | 0,286908359 | -0,09 | 0,90345282  | 0,45  | 0,539442858 | 0,24  | 0,825990389 |
| Sva      | 0,22  | 0,714793039 | 0,14  | 0,810875398 | 0,02  | 0,983926261 | -0,09 | 0,87613802  | 0,02  | 0,982816728 |

|           |       |             |       |             |       |             |       |             |       |             |
|-----------|-------|-------------|-------|-------------|-------|-------------|-------|-------------|-------|-------------|
| Sval1     | 0,18  | 0,805313174 | 0,17  | 0,807175471 | -0,25 | 0,658721799 | 0,05  | 0,919889648 | -0,02 | 0,979338129 |
| Sval2     | 0,06  | 0,919758492 | 0,17  | 0,798420709 | 0,04  | 0,963578796 | -0,14 | 0,770940803 | -0,36 | 0,574285481 |
| Sval3     | 0,6   | 0,416726762 | 0,09  | 0,917256002 | -0,18 | 0,806062428 | 0,14  | 0,727197341 | 0,34  | 0,726042963 |
| Svbp      | 0,05  | 0,932531737 | 0,01  | 0,993221425 | -0,15 | 0,820245247 | 1,32  | 0,010660587 | -0,06 | 0,949544475 |
| Svep1     | -0,11 | 0,827441872 | -0,29 | 0,590722193 | -0,16 | 0,827656829 | 0,04  | 0,949239972 | -0,1  | 0,910083563 |
| Svil      | -0,07 | 0,910311858 | -0,32 | 0,665887221 | 0,2   | 0,782988471 | 0,25  | 0,624359865 | -0,13 | 0,873662525 |
| Svip      | -0,13 | 0,785516518 | 0,05  | 0,932965109 | -0,05 | 0,963221639 | -0,89 | 0,234549057 | 0,2   | 0,825564898 |
| Svop      | 0,49  | 0,375512713 | -0,19 | 0,764299173 | -0,28 | 0,661089127 | 0,2   | 0,825899927 | 0,36  | 0,735152891 |
| Svopl     | 0,02  | 0,984040323 | 0,03  | 0,981914565 | -0,12 | 0,860188243 | -0,06 | 0,949342852 | -0,06 | 0,952190189 |
| Svs1      | 0,02  | 0,990894139 | -0,25 | 0,735554037 | 0,11  | 0,894339966 | 0,4   | 0,543073902 | 0,46  | 0,633743395 |
| Svs2      | 0,11  | 0,858063681 | 0,26  | 0,750160982 | 0,04  | 0,950846671 | 0,24  | 0,640458069 | 0,08  | 0,938464659 |
| Svs3a     | 0,1   | 0,850952988 | -0,07 | 0,889437471 | 0,08  | 0,904057901 | 0,01  | 0,991135523 | 0,3   | 0,697757911 |
| Svs3b     | -0,15 | 0,701086418 | 0,05  | 0,919602924 | -0,24 | 0,715497532 | -0,17 | 0,727909265 | -0,12 | 0,859050817 |
| Svs4      | 0,17  | 0,783099876 | 0,19  | 0,782712411 | 0,13  | 0,809062815 | 0,47  | 0,260896922 | 0,07  | 0,940092696 |
| Svs5      | 0,36  | 0,658266451 | 0,57  | 0,501438027 | -0,34 | 0,638965268 | -0,1  | 0,882463873 | 0,11  | 0,875421436 |
| Svs6      | -0,21 | 0,69656531  | 0,2   | 0,840024986 | -0,22 | 0,709846532 | 0,35  | 0,632716183 | 0,16  | 0,876927228 |
| Swap70    | 0     | 0,997888714 | 0,21  | 0,674643073 | -0,44 | 0,404982221 | 0,16  | 0,729857506 | 0,14  | 0,881943508 |
| Swi5      | -0,06 | 0,923035054 | -0,36 | 0,439108392 | 0,36  | 0,550559442 | 0,72  | 0,178636708 | 0,26  | 0,735737121 |
| Swsap1    | -0,31 | 0,697356307 | -0,02 | 0,996113371 | -0,07 | 0,963199274 | -1,02 | 0,266021355 | -1,52 | 0,122783026 |
| Swt1      | 0,11  | 0,877849931 | -0,13 | 0,810340604 | -0,43 | 0,627536778 | -0,28 | 0,654230107 | 0,13  | 0,904836805 |
| Syap1     | -0,24 | 0,617280733 | 0,4   | 0,302028989 | -0,23 | 0,814575035 | -0,16 | 0,743691206 | 0,16  | 0,823098095 |
| Sybu      | -0,01 | 0,995491315 | 0,78  | 0,173488446 | -0,06 | 0,973006385 | -0,54 | 0,100206405 | 0,35  | 0,791971532 |
| Syce1     | -0,25 | 0,695932247 | 0,28  | 0,74583457  | 0,07  | 0,952366216 | 0,34  | 0,401127096 | 0,37  | 0,539008425 |
| Syce11    | -0,14 | 0,911074343 | 0,71  | 0,366789691 | 0,01  | 0,99416325  | 0,05  | 0,965653854 | -0,17 | 0,887287916 |
| Syce2     | -1,02 | 0,071512866 | -0,38 | 0,891749049 | 0,86  | 0,246580815 | 1,22  | 0,073035707 | 0,05  | 0,976743304 |
| Syce3     | 0,09  | 0,902939265 | 0,13  | 0,752038109 | 0,07  | 0,922318683 | 0,1   | 0,812048135 | 0,08  | 0,932111028 |
| Sycn      | 0,13  | 0,823462545 | 0,12  | 0,84536438  | 0,22  | 0,71018068  | 0,22  | 0,563786734 | -0,04 | 0,962820357 |
| Sycp1     | -0,29 | 0,656726345 | 0,16  | 0,929731201 | -0,18 | 0,849697489 | 0,5   | 0,542547247 | 0,17  | 0,794001669 |
| Sycp1-ps1 | 0,12  | 0,772859736 | 0     | 1           | -0,03 | 0,971268254 | 0,04  | 0,933020032 | 0,31  | 0,563077271 |
| Sycp2     | 0,26  | 0,701624105 | 0,41  | 0,652391899 | -0,15 | 0,839921239 | 0,1   | 0,899003207 | 0,78  | 0,114506165 |
| Sycp2l    | -0,41 | 0,491617162 | 0,08  | 0,962156009 | -0,02 | 0,991451381 | -0,05 | 0,978135806 | -0,02 | 0,991628025 |
| Sycp3     | 0,07  | 0,933815936 | 0,16  | 0,842663656 | 0,04  | 0,950052494 | -0,69 | 0,572854044 | -0,62 | 0,673577848 |
| Syde1     | 0,5   | 0,480319644 | 0,6   | 0,438549879 | -0,19 | 0,750624323 | 0,02  | 0,976464748 | 0,31  | 0,583434544 |
| Syde2     | 0,14  | 0,832798869 | 0,05  | 0,947986685 | 0,08  | 0,935945983 | -1,08 | 0,206540971 | -0,58 | 0,498553997 |
| Syf2      | 0,55  | 0,260634235 | 0,12  | 0,82485467  | -0,41 | 0,473499244 | -0,62 | 0,098577249 | 0,4   | 0,501644357 |



|               |       |             |       |             |       |             |       |             |       |             |
|---------------|-------|-------------|-------|-------------|-------|-------------|-------|-------------|-------|-------------|
| Syk           | -0,5  | 0,575887113 | 0,04  | 0,944539044 | 0,07  | 0,967304745 | 2,73  | 0,003977829 | 0,09  | 0,915356549 |
| Sympk         | -0,15 | 0,727387897 | -0,2  | 0,695823136 | 0,55  | 0,473499244 | 0,27  | 0,673403369 | -0,34 | 0,633315948 |
| Syn1          | -0,07 | 0,924561835 | -0,02 | 0,994802028 | 0,04  | 0,975866042 | -0,31 | 0,42749877  | 0,07  | 0,939127163 |
| Syn2          | -0,12 | 0,889161921 | -0,17 | 0,702251293 | -0,07 | 0,979791644 | -0,36 | 0,660443663 | -0,37 | 0,683162854 |
| Syn3          | -0,09 | 0,912338018 | 0,24  | 0,582502577 | -0,16 | 0,835677021 | 0,29  | 0,636971316 | 0,52  | 0,476496602 |
| Syna          | 0,11  | 0,816534187 | -0,19 | 0,740740501 | -0,01 | 0,995007689 | 0,25  | 0,656052937 | 0,41  | 0,708898543 |
| Synb          | -0,07 | 0,922118639 | -0,09 | 0,916730432 | 0     | 0,996265665 | 0,12  | 0,838236207 | 0,03  | 0,977599806 |
| Sync          | -0,36 | 0,718038014 | 0,1   | 0,918400751 | -0,42 | 0,777417583 | 0,27  | 0,833710589 | -0,14 | 0,91339829  |
| Syncrip       | -0,41 | 0,291156435 | -0,38 | 0,430154065 | 0,33  | 0,545465016 | 0,89  | 0,121042451 | 0,15  | 0,860282167 |
| Syndig1       | 0,32  | 0,757751953 | 0,29  | 0,860705326 | -0,43 | 0,527671039 | 0,18  | 0,849242587 | 0,08  | 0,93106202  |
| Syndig1l      | 0,17  | 0,747663533 | 0,34  | 0,5004399   | 0,4   | 0,518319423 | -0,13 | 0,776545078 | 0,08  | 0,947559952 |
| Syne1         | -0,3  | 0,612528603 | -0,36 | 0,514228058 | 0,07  | 0,926974012 | -1,88 | 0,008840293 | -0,49 | 0,328817797 |
| Syne2         | -0,36 | 0,496123406 | -0,22 | 0,595984402 | 0,37  | 0,598179126 | -1,63 | 0,008325129 | -0,62 | 0,164519422 |
| Syne3         | -0,73 | 0,296031134 | -0,16 | 0,692422395 | -0,42 | 0,759399009 | -0,47 | 0,770504914 | -0,13 | 0,954892212 |
| Syne4         | 0,34  | 0,457579878 | 0,03  | 0,977204386 | 0,71  | 0,435556279 | -0,27 | 0,64059095  | 0,41  | 0,696982232 |
| Syngap1       | 0,19  | 0,766705553 | 0,35  | 0,565639972 | -0,4  | 0,548750983 | -0,25 | 0,623678563 | 0,13  | 0,924431292 |
| Syng1         | 0,11  | 0,917289993 | 0,04  | 0,965147491 | -0,37 | 0,659555232 | 0,24  | 0,724314694 | 0,08  | 0,96506592  |
| Syng2         | -0,38 | 0,316599006 | -0,03 | 0,975103597 | 0,18  | 0,790487017 | 0,23  | 0,608524871 | -0,34 | 0,486794487 |
| Syng3         | -0,1  | 0,829299665 | -0,14 | 0,809683705 | -0,39 | 0,37168418  | 0,06  | 0,907425361 | 0,14  | 0,836061657 |
| Syng4         | 0,18  | 0,705666778 | -0,05 | 0,918041124 | -0,2  | 0,783326867 | 0,25  | 0,672306766 | 0,29  | 0,745497116 |
| Synj1         | -0,3  | 0,460231397 | -0,21 | 0,667502888 | 0,42  | 0,387362229 | -0,29 | 0,588534092 | -0,13 | 0,918288793 |
| Synj2         | -0,16 | 0,805438081 | -0,38 | 0,420953105 | 0,06  | 0,935778422 | 0,58  | 0,383914763 | -0,09 | 0,940092696 |
| Synj2bp       | -0,62 | 0,687662951 | -0,51 | 0,670859269 | 1,06  | 0,189578329 | 0,12  | 0,944509013 | 0,6   | 0,697757911 |
| Synj2bp-cox16 | -0,51 | 0,406819287 | -0,17 | 0,956049982 | 0,87  | 0,417082373 | -0,76 | 0,65865291  | -0,38 | 0,810572057 |
| Synm          | -0,37 | 0,500832169 | -0,46 | 0,628442147 | 0,38  | 0,527929204 | 0,82  | 0,053429531 | -0,22 | 0,71579227  |
| Synpo         | -0,08 | 0,870052902 | 0,1   | 0,861905894 | -0,84 | 0,265846442 | 0,38  | 0,24812886  | -0,54 | 0,438444904 |
| Synpo2        | 0,11  | 0,9231839   | 0,38  | 0,490814009 | -0,1  | 0,922971065 | -0,82 | 0,280695943 | -1,01 | 0,150296522 |
| Synpo2l       | 0,21  | 0,764288636 | -0,33 | 0,619025787 | -0,42 | 0,507425636 | 0,39  | 0,39527702  | -0,16 | 0,837746808 |
| Synpr         | -0,03 | 0,980474127 | 0,02  | 0,981586987 | 0,06  | 0,947460329 | -0,44 | 0,412398107 | 0,09  | 0,930287169 |
| Synrg         | -0,51 | 0,496123406 | 0,26  | 0,680709276 | -0,21 | 0,816934675 | -1    | 0,022056412 | -0,26 | 0,695575424 |
| Syp           | -0,37 | 0,470455626 | 0,01  | 0,995199255 | -0,27 | 0,614757107 | -1,07 | 0,129154295 | -0,22 | 0,878967193 |
| Sypl          | -0,15 | 0,926962211 | 0,29  | 0,827695062 | -0,07 | 0,969570532 | -0,42 | 0,696916504 | -0,13 | 0,913274952 |
| Sypl2         | 0,24  | 0,758721455 | -0,73 | 0,462629989 | -0,29 | 0,676066181 | 0,51  | 0,3645238   | -0,08 | 0,939948423 |
| Sys1          | 0,41  | 0,450520646 | -0,14 | 0,796137964 | 0,57  | 0,475944471 | 0,29  | 0,428978658 | 0,34  | 0,639345637 |
| Syt1          | -0,06 | 0,944291635 | 0,12  | 0,935984823 | 0,14  | 0,887450682 | -0,45 | 0,564245683 | -0,28 | 0,778593926 |

|        |       |             |       |             |       |             |       |             |       |             |
|--------|-------|-------------|-------|-------------|-------|-------------|-------|-------------|-------|-------------|
| Syt10  | 0,09  | 0,908108677 | -0,08 | 0,926157704 | -0,13 | 0,867109522 | 0,32  | 0,676010477 | 0,05  | 0,962820357 |
| Syt11  | -0,07 | 0,970463755 | 0,24  | 0,89474699  | 0,04  | 0,985899191 | -2,34 | 0,057447514 | -0,56 | 0,611006806 |
| Syt12  | 0,06  | 0,963914207 | -0,06 | 0,937348524 | 0,82  | 0,241609141 | 0,35  | 0,639359737 | 0,23  | 0,823776279 |
| Syt13  | 0,14  | 0,879088386 | 0,25  | 0,619655121 | -0,02 | 0,977939889 | -0,21 | 0,737087309 | 0,05  | 0,968934014 |
| Syt14  | 0,24  | 0,806351733 | 0,18  | 0,814499098 | 0,03  | 0,982331372 | -0,08 | 0,951235707 | 0,25  | 0,879788924 |
| Syt15  | -1,34 | 0,079733705 | -0,33 | 0,690453271 | 0,78  | 0,083676252 | 0,05  | 0,967866794 | 0,05  | 0,975441362 |
| Syt16  | 0,1   | 0,866989155 | -0,22 | 0,664787536 | -0,23 | 0,729259537 | -0,05 | 0,916072825 | 0,17  | 0,765809384 |
| Syt17  | -0,23 | 0,624159697 | -0,15 | 0,796106258 | 0,02  | 0,985187368 | -0,29 | 0,619134782 | -0,32 | 0,708734269 |
| Syt2   | -0,33 | 0,470634544 | -0,01 | 0,995205602 | 0,01  | 0,993379272 | -0,19 | 0,605919426 | -0,46 | 0,361452103 |
| Syt3   | -0,18 | 0,683531628 | 0,07  | 0,935984823 | 0,2   | 0,823695413 | -0,74 | 0,170192348 | -0,19 | 0,844265172 |
| Syt4   | 0,35  | 0,428049245 | -0,02 | 0,990962972 | 0,03  | 0,971182002 | 0,08  | 0,931477012 | -0,04 | 0,979643119 |
| Syt5   | 0,4   | 0,851458474 | -0,45 | 0,642545139 | -0,14 | 0,901032944 | -0,45 | 0,616285736 | -0,12 | 0,924867043 |
| Syt6   | -0,07 | 0,949362206 | -0,36 | 0,520395205 | 0,03  | 0,973732268 | -0,07 | 0,847641912 | -0,42 | 0,368102379 |
| Syt7   | -0,36 | 0,492576295 | 0,07  | 0,932628106 | -0,22 | 0,791940256 | -1,47 | 0,021644799 | -0,76 | 0,479585604 |
| Syt8   | 0,14  | 0,846396479 | -0,44 | 0,647475869 | -0,12 | 0,875434047 | -0,01 | 0,993849571 | -0,03 | 0,984125319 |
| Syt9   | -0,23 | 0,597519827 | 0,28  | 0,606999442 | 0,1   | 0,922318683 | -0,02 | 0,968311421 | -0,03 | 0,975651837 |
| Syt11  | -0,24 | 0,765643907 | -0,29 | 0,601295905 | -0,09 | 0,906709737 | 0,17  | 0,648154714 | 0,12  | 0,860591136 |
| Syt12  | -0,06 | 0,90742841  | 0,15  | 0,887752277 | -0,09 | 0,898935616 | -3,3  | 0,04182733  | 0,37  | 0,875520848 |
| Syt13  | -0,41 | 0,425529405 | 0,54  | 0,244759024 | -0,2  | 0,822718105 | -0,24 | 0,718510867 | -0,01 | 0,990633766 |
| Syt14  | 0,16  | 0,815665003 | 0,38  | 0,758297568 | 0,07  | 0,947174765 | 0,12  | 0,80174822  | 0,33  | 0,726042963 |
| Syt15  | 0,52  | 0,489766805 | 0,2   | 0,823530278 | -0,18 | 0,732624117 | -0,12 | 0,8556361   | 0,27  | 0,829541704 |
| Syvn1  | 0,26  | 0,741787285 | -0,1  | 0,892727342 | 0,16  | 0,835527943 | 0,31  | 0,638988093 | 0,49  | 0,562212408 |
| Szrd1  | -0,02 | 0,966775766 | -0,06 | 0,926157704 | -0,11 | 0,873457545 | 0,34  | 0,447310044 | -0,11 | 0,898448235 |
| Szt2   | -0,01 | 0,99658     | 0     | 0,999395995 | 0,37  | 0,569528065 | -0,19 | 0,831133242 | -0,74 | 0,304573171 |
| T      | 0,39  | 0,552070283 | -0,45 | 0,651587568 | 0,18  | 0,840187016 | -0,05 | 0,959557369 | 0     | 0,996733137 |
| T2     | 0,01  | 0,998017023 | -0,25 | 0,874448335 | 0,17  | 0,804607903 | 0,32  | 0,604127556 | -0,11 | 0,916837154 |
| Taar1  | 0,08  | 0,868854341 | 0,09  | 0,840864779 | -0,14 | 0,803963753 | -0,45 | 0,311910933 | -0,32 | 0,623046105 |
| Taar2  | 0,01  | 0,98297164  | 0     | 0,999395995 | -0,21 | 0,709317317 | 0,05  | 0,932800758 | -0,17 | 0,824818547 |
| Taar3  | -0,33 | 0,476324469 | 0,23  | 0,704681588 | 0,18  | 0,795128728 | -0,29 | 0,563786734 | -0,11 | 0,904636459 |
| Taar4  | -0,02 | 0,972164346 | 0,18  | 0,664502462 | 0,1   | 0,85562767  | -0,09 | 0,810172317 | -0,22 | 0,718653576 |
| Taar5  | 0,21  | 0,67806773  | -0,13 | 0,781665479 | 0,05  | 0,944441051 | 0,18  | 0,659707323 | -0,24 | 0,777561251 |
| Taar6  | 0,32  | 0,607696343 | -0,18 | 0,764977206 | 0,03  | 0,973641476 | 0,01  | 0,989926105 | -0,1  | 0,883592868 |
| Taar7a | 0,09  | 0,864598944 | 0,05  | 0,938233008 | 0,19  | 0,752954039 | -0,08 | 0,85846312  | -0,19 | 0,780761723 |
| Taar7b | -0,04 | 0,965116762 | -0,26 | 0,611052267 | -0,21 | 0,716685861 | 0,06  | 0,908141892 | 0,48  | 0,511962622 |
| Taar7e | -0,09 | 0,916234877 | 0,14  | 0,816072348 | -0,13 | 0,8768401   | -0,65 | 0,267147508 | -0,61 | 0,32029895  |

|         |       |             |       |             |       |             |       |             |       |             |
|---------|-------|-------------|-------|-------------|-------|-------------|-------|-------------|-------|-------------|
| Taar7f  | 0,19  | 0,680165801 | 0,04  | 0,963791015 | -0,11 | 0,896181325 | -0,11 | 0,886071047 | -0,29 | 0,671305308 |
| Taar8a  | 0,03  | 0,959065027 | -0,05 | 0,931676012 | -0,12 | 0,809137779 | -0,1  | 0,810172317 | -0,04 | 0,954316248 |
| Taar8b  | 0,02  | 0,976574175 | 0,1   | 0,85597055  | -0,27 | 0,572378632 | 0,05  | 0,92678264  | 0,06  | 0,942990206 |
| Taar8c  | 0,02  | 0,981777139 | -0,09 | 0,908937333 | 0,07  | 0,915321116 | 0,03  | 0,960052497 | -0,2  | 0,822201733 |
| Taar9   | -0,02 | 0,983516046 | 0,54  | 0,695689103 | 0,15  | 0,795128728 | -0,02 | 0,973294863 | 0,1   | 0,905581898 |
| Tab1    | -0,76 | 0,13473547  | -1,12 | 0,322591012 | 0,39  | 0,589715384 | 0,15  | 0,818151941 | -0,39 | 0,616797608 |
| Tab2    | 0,3   | 0,430173798 | 0,3   | 0,420485441 | -0,45 | 0,461784527 | -0,02 | 0,976330091 | 0,53  | 0,272986942 |
| Tab3    | 0     | 0,998769353 | -0,49 | 0,600177044 | -0,39 | 0,715663629 | 0,45  | 0,555880182 | -0,17 | 0,892912029 |
| Tac1    | 0,12  | 0,913425276 | -0,61 | 0,311904351 | 0,01  | 0,993379272 | 0,37  | 0,5823626   | -0,21 | 0,881943508 |
| Tac2    | 0,02  | 0,98456417  | -0,06 | 0,912137323 | 0,08  | 0,966359868 | -0,2  | 0,888267343 | -0,15 | 0,917075631 |
| Tac4    | -0,29 | 0,687662951 | 0,34  | 0,508633526 | -0,05 | 0,954550124 | 0,13  | 0,891748583 | 0,08  | 0,954657649 |
| Tacc1   | -0,7  | 0,308710171 | 0,15  | 0,782652703 | 0,01  | 0,99407001  | -1,11 | 0,11028862  | -0,88 | 0,276369104 |
| Tacc2   | -0,45 | 0,345171513 | -0,47 | 0,377007015 | 0,36  | 0,624235852 | -0,18 | 0,707807097 | -0,53 | 0,292707282 |
| Tacc3   | -0,47 | 0,290474279 | -1,28 | 0,087315688 | 1,18  | 0,287401098 | 1,69  | 0,049121256 | -0,42 | 0,74624632  |
| Taco1   | -0,11 | 0,877539178 | -0,05 | 0,962138182 | -0,18 | 0,734124133 | 0,3   | 0,633513    | -0,4  | 0,566248044 |
| Taco1os | -0,19 | 0,66961506  | 0,14  | 0,853569707 | -0,05 | 0,9690135   | -0,02 | 0,970931237 | -0,27 | 0,583279373 |
| Tacr1   | -0,32 | 0,683444889 | -0,51 | 0,390751508 | -0,26 | 0,743653977 | 3,81  | 0,003977829 | -0,17 | 0,82517732  |
| Tacr2   | 0,57  | 0,519845843 | 0,3   | 0,536246395 | 0,01  | 0,996596939 | -0,02 | 0,977322993 | 0,46  | 0,534171045 |
| Tacr3   | 0,32  | 0,728516314 | -0,43 | 0,424863079 | -0,21 | 0,798256373 | -0,11 | 0,945619692 | -0,52 | 0,721620565 |
| Tacstd2 | -0,15 | 0,783200207 | 0,29  | 0,575373651 | -0,02 | 0,990836784 | -0,68 | 0,299499224 | -0,49 | 0,615262323 |
| Tada1   | -0,15 | 0,813220024 | 0,04  | 0,975427696 | 0,26  | 0,788233735 | 0,74  | 0,206540971 | -0,33 | 0,774826589 |
| Tada2a  | -0,35 | 0,757032046 | 0,02  | 0,997344247 | 0,57  | 0,661089127 | 0     | 0,996287679 | -0,38 | 0,462558109 |
| Tada2b  | -0,09 | 0,909885273 | -0,28 | 0,627893736 | 0,09  | 0,90555701  | -0,24 | 0,490176405 | -0,13 | 0,865258929 |
| Tada3   | 0,14  | 0,803291325 | 0,05  | 0,967833514 | -0,08 | 0,911558649 | -0,02 | 0,979516321 | -0,13 | 0,874688007 |
| Taf1    | -0,73 | 0,178589155 | -0,24 | 0,615288453 | 0,41  | 0,411266584 | -0,12 | 0,888566393 | 0,16  | 0,885872093 |
| Taf10   | -0,06 | 0,942440481 | -0,23 | 0,568187167 | 0,21  | 0,738804472 | 0,37  | 0,474127813 | -0,1  | 0,904931004 |
| Taf11   | 0,01  | 0,992724708 | -0,02 | 0,975103597 | 0,63  | 0,324705558 | 0,39  | 0,4729993   | 0,09  | 0,947437555 |
| Taf12   | -0,47 | 0,487185115 | 0,14  | 0,822581347 | 0,3   | 0,617943722 | -0,05 | 0,97507484  | 0,15  | 0,933064949 |
| Taf13   | -0,8  | 0,114256435 | 0,09  | 0,945435648 | 0,39  | 0,552370922 | -0,52 | 0,639359737 | 0,19  | 0,901162079 |
| Taf15   | 0,08  | 0,886486962 | -0,03 | 0,957659362 | 0,09  | 0,906747817 | 0,27  | 0,490323016 | 0,29  | 0,613836622 |
| Taf1a   | -0,79 | 0,493444352 | -0,34 | 0,861862086 | 0,34  | 0,515835379 | -0,47 | 0,310757819 | 0,07  | 0,965141509 |
| Taf1b   | -0,02 | 0,983711346 | 0,34  | 0,638366221 | 0,44  | 0,760930184 | -0,61 | 0,129101197 | -0,45 | 0,418498045 |
| Taf1c   | -0,07 | 0,909167171 | 0,11  | 0,805949528 | -0,26 | 0,712697139 | -0,56 | 0,178451816 | -0,19 | 0,77360786  |
| Taf1d   | 0,4   | 0,468111704 | 0,06  | 0,948314657 | 0,17  | 0,873750496 | 0,83  | 0,313316285 | 0,49  | 0,587105866 |
| Taf2    | -0,29 | 0,474293292 | 0,03  | 0,970762922 | 1,04  | 0,206251592 | -0,01 | 0,993646757 | -0,3  | 0,669861917 |

|        |       |             |       |             |       |             |       |             |       |             |
|--------|-------|-------------|-------|-------------|-------|-------------|-------|-------------|-------|-------------|
| Taf3   | -0,06 | 0,934802231 | -0,21 | 0,646170664 | 0,82  | 0,372094545 | -0,25 | 0,474175236 | -0,06 | 0,946463658 |
| Taf4   | -0,3  | 0,665609782 | 0,03  | 0,978528738 | 0,05  | 0,970992385 | -0,32 | 0,51421599  | -0,31 | 0,715879151 |
| Taf4b  | 0,32  | 0,602160482 | 0,9   | 0,131076642 | 0,27  | 0,848462153 | -0,19 | 0,898628138 | 0,36  | 0,792305774 |
| Taf5   | 0,12  | 0,882119027 | -0,66 | 0,352228531 | -0,21 | 0,856046789 | 0,68  | 0,32072628  | 0,75  | 0,332695011 |
| Taf5l  | -0,14 | 0,803337362 | 0,15  | 0,756813839 | -0,06 | 0,943069255 | 0,37  | 0,509774032 | -0,01 | 0,991291007 |
| Taf6   | 0,08  | 0,932671813 | -0,11 | 0,859917649 | 0,69  | 0,13589176  | -0,02 | 0,965842143 | -0,28 | 0,640381913 |
| Taf6l  | -0,64 | 0,178589155 | 0,2   | 0,818072947 | -0,36 | 0,542398079 | 0,17  | 0,921036173 | 0,18  | 0,931519966 |
| Taf7   | 0,17  | 0,844880277 | 0,39  | 0,595136728 | -0,01 | 0,994886496 | -0,79 | 0,203937011 | 0,42  | 0,502335758 |
| Taf7l  | -0,3  | 0,675149694 | -0,44 | 0,666450149 | -0,47 | 0,474932301 | -0,13 | 0,898900573 | -0,06 | 0,960974478 |
| Taf8   | -0,16 | 0,833014543 | 0,11  | 0,935984823 | 0,08  | 0,952104131 | -0,62 | 0,246242665 | -0,11 | 0,885872093 |
| Taf9   | -0,34 | 0,540296693 | -0,11 | 0,793603525 | 0,44  | 0,421026326 | 0,09  | 0,838270726 | 0,03  | 0,979169422 |
| Taf9b  | -0,51 | 0,178589155 | -0,25 | 0,842663656 | -0,06 | 0,934813979 | -1,16 | 0,08326794  | -0,6  | 0,297385654 |
| Tagap  | 0,26  | 0,83569382  | -0,3  | 0,651587568 | -0,93 | 0,509702247 | -0,22 | 0,815481061 | -0,02 | 0,984724142 |
| Tagap1 | 0,02  | 0,983516046 | 0,17  | 0,808168923 | 0,35  | 0,703468807 | -0,33 | 0,627490125 | 0,12  | 0,937558003 |
| Tagln  | -0,45 | 0,63699384  | 0,5   | 0,475079924 | 1,25  | 0,038925327 | -1,92 | 0,01517378  | -0,99 | 0,074154538 |
| Tagln2 | -0,45 | 0,233248426 | -0,33 | 0,428913843 | 0,42  | 0,40680169  | 0,45  | 0,166319387 | -0,3  | 0,525980128 |
| Tagln3 | 0,27  | 0,659879365 | -0,16 | 0,873411651 | -0,24 | 0,83442082  | -0,19 | 0,893609448 | 0,45  | 0,694326198 |
| Tal1   | -0,47 | 0,450477491 | 0,1   | 0,924916733 | -0,21 | 0,757498725 | -0,7  | 0,239342446 | -0,12 | 0,879069474 |
| Tal2   | -0,28 | 0,533206739 | -0,01 | 0,994802028 | -0,19 | 0,774410417 | -0,04 | 0,943143586 | 0,6   | 0,563077271 |
| Taldo1 | -0,02 | 0,974267399 | -0,36 | 0,435170839 | 0,17  | 0,771809596 | 0,35  | 0,533677643 | -0,16 | 0,838957343 |
| Tamm41 | -0,45 | 0,316599006 | -0,14 | 0,847821325 | 0,3   | 0,739945591 | -0,01 | 0,992201557 | -0,2  | 0,760657649 |
| Tanc1  | 0,09  | 0,86554415  | 0,04  | 0,966125033 | 0,34  | 0,552093103 | 0,07  | 0,909976349 | -0,03 | 0,979152939 |
| Tanc2  | -0,08 | 0,933340518 | -0,41 | 0,77325041  | 0,32  | 0,765570799 | -0,93 | 0,04640378  | -0,75 | 0,14415153  |
| Tango2 | 0,09  | 0,892823025 | -0,59 | 0,394193157 | -0,57 | 0,215429632 | 0,1   | 0,874701048 | -0,19 | 0,776907684 |
| Tango6 | -0,46 | 0,52759289  | -0,53 | 0,51825831  | 0,6   | 0,156156107 | -0,55 | 0,173600687 | -0,86 | 0,137394562 |
| Tank   | 0,21  | 0,852363306 | 0,71  | 0,254708337 | 0,31  | 0,58160408  | 1,88  | 0,013116308 | 0,13  | 0,860292816 |
| Taok1  | 0,08  | 0,904043614 | 0,21  | 0,775481608 | -0,1  | 0,908526448 | -0,28 | 0,600013639 | -0,04 | 0,966206951 |
| Taok2  | -0,45 | 0,465553333 | -0,14 | 0,781665479 | 0,45  | 0,461745368 | -0,51 | 0,134706252 | -0,42 | 0,378814275 |
| Taok3  | 0,2   | 0,733583213 | 0,43  | 0,49125334  | -0,17 | 0,870745823 | -0,26 | 0,530930502 | -0,39 | 0,48837696  |
| Tap1   | 1,13  | 0,319316242 | 0,53  | 0,205273528 | -1,67 | 0,009489185 | 0,34  | 0,4272539   | 1,21  | 0,02705109  |
| Tap2   | 0,98  | 0,181672845 | 1,01  | 0,129650782 | -1,28 | 0,036818657 | -0,45 | 0,197435449 | 1,03  | 0,031098116 |
| Tapbp  | 0,86  | 0,239601221 | 0,84  | 0,147949735 | -1,16 | 0,068894819 | -0,17 | 0,703751395 | 0,91  | 0,05100134  |
| Tapbpl | 1,05  | 0,233527503 | 1,05  | 0,104457339 | -0,99 | 0,070777368 | -0,08 | 0,901377702 | 1,53  | 0,015056333 |
| Tapt1  | -0,34 | 0,778698463 | -0,13 | 0,883093763 | 0,54  | 0,593455611 | -0,56 | 0,188915451 | 0,32  | 0,556366004 |
| Tarbp2 | 0,17  | 0,838208309 | 0,16  | 0,850001559 | 0,36  | 0,611144549 | 0,34  | 0,293188316 | -0,41 | 0,537590834 |

|          |       |             |       |             |       |             |       |             |       |             |
|----------|-------|-------------|-------|-------------|-------|-------------|-------|-------------|-------|-------------|
| Tardbp   | 0,31  | 0,449954369 | -0,19 | 0,649611595 | 0,05  | 0,969269701 | 0,44  | 0,414522125 | -0,13 | 0,912250982 |
| Tarm1    | 0,18  | 0,801386084 | -0,15 | 0,849724834 | 1,13  | 0,503819492 | -0,21 | 0,802239788 | -0,15 | 0,859932186 |
| Tars     | -0,32 | 0,472847723 | 0,05  | 0,959685428 | 0,06  | 0,952366216 | 1,23  | 0,046206622 | 1,07  | 0,159047845 |
| Tars2    | -0,16 | 0,691658566 | 0,38  | 0,532743559 | -0,18 | 0,787011462 | 0,71  | 0,082074641 | -0,09 | 0,927296036 |
| Tarsl2   | -0,13 | 0,867766061 | -0,06 | 0,938233008 | 0,32  | 0,795128728 | -0,18 | 0,82581314  | -0,48 | 0,685336914 |
| Tas1r1   | -0,11 | 0,903817676 | -0,15 | 0,755393855 | 0,06  | 0,947207818 | 0,31  | 0,550483161 | 0,44  | 0,492198964 |
| Tas1r2   | 0,8   | 0,263252718 | -0,19 | 0,79295936  | 0,11  | 0,906097666 | 0,49  | 0,39527702  | 0,06  | 0,954321967 |
| Tas1r3   | 0,15  | 0,887501824 | 0,86  | 0,217093794 | -0,32 | 0,50620307  | -0,87 | 0,174313619 | -0,66 | 0,326307411 |
| Tas2r102 | 0,1   | 0,8102165   | 0,04  | 0,945374636 | 0,18  | 0,752157341 | -0,02 | 0,956930426 | 0,09  | 0,893117638 |
| Tas2r103 | 0,16  | 0,714662474 | 0,05  | 0,92643313  | -0,1  | 0,894415564 | 0,02  | 0,960914606 | -0,03 | 0,976743304 |
| Tas2r104 | 0,05  | 0,935744129 | -0,02 | 0,982047684 | -0,13 | 0,834017354 | 0,2   | 0,586887461 | -0,04 | 0,967522546 |
| Tas2r105 | 0,34  | 0,688110215 | -0,1  | 0,898238238 | 0,06  | 0,958867495 | -0,12 | 0,818919506 | -0,27 | 0,699060093 |
| Tas2r106 | -0,05 | 0,907844906 | 0,04  | 0,943254975 | 0,13  | 0,803963753 | -0,14 | 0,69938772  | -0,09 | 0,900494923 |
| Tas2r107 | -0,04 | 0,963228289 | -0,17 | 0,859816636 | -0,07 | 0,920926565 | 0,07  | 0,889515057 | 0,19  | 0,787488862 |
| Tas2r108 | -0,09 | 0,941218573 | -0,01 | 0,984812702 | 0,17  | 0,856605654 | 0,01  | 0,983061756 | 0,57  | 0,348831911 |
| Tas2r109 | 0,17  | 0,783929127 | 0,01  | 0,987282412 | -0,19 | 0,723987482 | -0,1  | 0,812625466 | -0,31 | 0,573495744 |
| Tas2r110 | 0,02  | 0,975506993 | -0,18 | 0,800393331 | 0,19  | 0,686394583 | 0,15  | 0,680884988 | -0,02 | 0,979456872 |
| Tas2r113 | -0,01 | 0,984068541 | 0     | 1           | -0,08 | 0,888956864 | -0,11 | 0,810508503 | 0,05  | 0,966157079 |
| Tas2r114 | 0,06  | 0,89900805  | -0,01 | 0,985151214 | -0,15 | 0,783424344 | -0,05 | 0,90529096  | -0,08 | 0,933827144 |
| Tas2r115 | 0,13  | 0,817601748 | -0,19 | 0,725783826 | -0,08 | 0,927978381 | 0,05  | 0,906178596 | 0,15  | 0,825966687 |
| Tas2r116 | 0,22  | 0,593405815 | 0,17  | 0,736366139 | -0,26 | 0,652919303 | -0,24 | 0,45532622  | -0,3  | 0,550083777 |
| Tas2r117 | -0,08 | 0,869225685 | -0,09 | 0,832655657 | 0,03  | 0,966359868 | 0,05  | 0,918648586 | 0,12  | 0,858534673 |
| Tas2r118 | 0,12  | 0,838208309 | -0,01 | 0,995350053 | -0,16 | 0,783006    | 0,09  | 0,85846312  | 0,08  | 0,913978885 |
| Tas2r119 | -0,14 | 0,785012364 | 0     | 1           | 0,02  | 0,979569273 | -0,02 | 0,959777804 | 0,03  | 0,974913681 |
| Tas2r120 | 0,2   | 0,628802144 | -0,07 | 0,892716986 | -0,31 | 0,527929204 | -0,03 | 0,952409831 | 0,22  | 0,745574572 |
| Tas2r121 | 0,29  | 0,520948125 | 0,12  | 0,842663656 | -0,08 | 0,911628908 | -0,06 | 0,895836916 | -0,06 | 0,952753183 |
| Tas2r122 | -0,11 | 0,803761785 | 0     | 1           | -0,15 | 0,742862028 | 0     | 1           | -0,01 | 0,985269236 |
| Tas2r123 | -0,09 | 0,873036861 | 0,13  | 0,801259805 | -0,05 | 0,94110925  | -0,05 | 0,908040243 | -0,05 | 0,953239987 |
| Tas2r124 | 0     | 0,999288019 | 0,02  | 0,978689001 | -0,07 | 0,917694073 | -0,01 | 0,984259903 | 0,08  | 0,920355527 |
| Tas2r125 | -0,03 | 0,953572732 | 0     | 1           | 0,09  | 0,910002544 | 0,15  | 0,655780295 | 0,1   | 0,884321797 |
| Tas2r126 | 0,25  | 0,657929675 | 0,45  | 0,647569143 | 0,33  | 0,533486746 | 0,06  | 0,893958719 | 1,29  | 0,067219139 |
| Tas2r129 | 0,19  | 0,712165686 | 0,44  | 0,410501758 | -0,29 | 0,533114844 | -0,36 | 0,241841256 | 0,15  | 0,801165628 |
| Tas2r130 | -0,1  | 0,886741208 | 0,51  | 0,265576333 | -0,2  | 0,770526999 | 0,03  | 0,971100918 | -0,18 | 0,819497528 |
| Tas2r131 | 0,65  | 0,306829062 | 0,36  | 0,862079816 | -0,2  | 0,744122364 | 0,01  | 0,987649291 | 0,06  | 0,960774794 |
| Tas2r134 | 0,05  | 0,937251448 | 0     | 1           | -0,14 | 0,816883729 | 0     | 0,997816344 | -0,12 | 0,854084773 |

|            |       |             |       |             |       |             |       |             |       |             |
|------------|-------|-------------|-------|-------------|-------|-------------|-------|-------------|-------|-------------|
| Tas2r135   | 1,62  | 0,090466364 | 0,33  | 0,874195024 | 0,52  | 0,340783964 | -0,33 | 0,759605176 | -0,02 | 0,991140351 |
| Tas2r136   | 0,13  | 0,807062435 | 0,1   | 0,883093763 | -0,09 | 0,891175722 | -0,06 | 0,89943107  | 0,1   | 0,91314596  |
| Tas2r137   | -0,3  | 0,492894586 | -0,08 | 0,857503073 | 0,39  | 0,797165207 | 0     | 0,999809258 | 0,33  | 0,57030321  |
| Tas2r138   | 0,02  | 0,978853388 | 0,03  | 0,953631922 | -0,05 | 0,948637233 | -0,04 | 0,943143586 | 0,11  | 0,91339829  |
| Tas2r139   | 0,01  | 0,983663467 | -0,01 | 0,994137877 | 0,11  | 0,871871109 | -0,02 | 0,969859375 | 0,08  | 0,91339829  |
| Tas2r140   | -0,12 | 0,7914678   | 0     | 1           | -0,14 | 0,824859002 | 0,02  | 0,965471779 | -0,04 | 0,958259949 |
| Tas2r143   | -0,57 | 0,393169325 | -0,11 | 0,956555856 | 0,15  | 0,912268947 | 0,46  | 0,774436663 | 0,27  | 0,895663184 |
| Tas2r144   | -0,23 | 0,692122761 | 0,14  | 0,764886087 | -0,13 | 0,82622365  | -0,04 | 0,941850565 | -0,02 | 0,980961333 |
| Tasp1      | 0,18  | 0,901611846 | 0,55  | 0,356307531 | 0,07  | 0,969476711 | -1,01 | 0,038569152 | -0,06 | 0,939948423 |
| Tat        | -0,09 | 0,870658484 | -0,34 | 0,48761393  | -0,42 | 0,564995575 | 0,12  | 0,879125869 | -0,01 | 0,991628025 |
| Tatdn1     | 0,14  | 0,864400092 | -0,27 | 0,855822577 | -0,37 | 0,835527943 | 0,73  | 0,234549057 | -0,85 | 0,444627076 |
| Tatdn2     | -0,09 | 0,933253663 | -0,48 | 0,557880587 | -0,25 | 0,77027744  | 0,42  | 0,245429212 | -0,39 | 0,523184505 |
| Tatdn3     | 0,02  | 0,98297164  | -0,6  | 0,493580894 | 0,69  | 0,70685843  | -0,1  | 0,882802901 | -0,73 | 0,241394095 |
| Tax1bp1    | 0,52  | 0,229780767 | 0,38  | 0,504611381 | 0,18  | 0,80931605  | -0,1  | 0,847253572 | 0,31  | 0,585298066 |
| Tax1bp3    | -0,11 | 0,843686315 | -0,14 | 0,730244888 | 0,36  | 0,418668458 | 1     | 0,024040886 | -0,33 | 0,579869722 |
| Taz        | -0,16 | 0,808572184 | -0,09 | 0,942593581 | 0,28  | 0,742758388 | -0,08 | 0,927360713 | 0,07  | 0,950308536 |
| Tbata      | 0,54  | 0,504629727 | -0,03 | 0,9860901   | -0,3  | 0,75076831  | -0,19 | 0,672122673 | -0,16 | 0,835191    |
| Tbc1d1     | -0,14 | 0,821267687 | -0,06 | 0,915282997 | 0,07  | 0,937520804 | -0,37 | 0,462394854 | -0,2  | 0,805875294 |
| Tbc1d10a   | -0,26 | 0,797266879 | -0,22 | 0,809683705 | 0,04  | 0,972482452 | 0,12  | 0,877656154 | -0,26 | 0,673635462 |
| Tbc1d10b   | -0,18 | 0,676906193 | -0,12 | 0,926157704 | 1,2   | 0,09059546  | 0,85  | 0,362132663 | -0,11 | 0,953297732 |
| Tbc1d10c   | 0,03  | 0,964272364 | -0,17 | 0,896890904 | 0,25  | 0,786922523 | -0,22 | 0,733028982 | 0,21  | 0,767285294 |
| Tbc1d12    | -0,26 | 0,829299665 | 0,43  | 0,49599855  | 0     | 0,999931921 | -0,26 | 0,801930792 | 0,23  | 0,868150458 |
| Tbc1d13    | -0,9  | 0,431394932 | -0,19 | 0,825162812 | 0,47  | 0,51127708  | 0,95  | 0,335352248 | 0,93  | 0,325920244 |
| Tbc1d14    | 0,35  | 0,830575431 | -0,35 | 0,829391238 | -0,14 | 0,911634383 | 0,57  | 0,588433913 | 0,21  | 0,904636459 |
| Tbc1d15    | 0,16  | 0,792909651 | 0,21  | 0,701492683 | -0,02 | 0,982449079 | -0,17 | 0,685229576 | -0,29 | 0,697757911 |
| Tbc1d16    | -0,82 | 0,277333992 | 0,03  | 0,992017084 | 0,22  | 0,773646012 | -0,37 | 0,726158589 | -0,21 | 0,874716101 |
| Tbc1d17    | -0,13 | 0,865776054 | -0,15 | 0,818476671 | -0,11 | 0,912268947 | -0,36 | 0,474992588 | -0,26 | 0,710634842 |
| Tbc1d19    | -0,41 | 0,49976831  | 0,31  | 0,426168855 | -0,4  | 0,633037349 | -0,12 | 0,830668785 | -0,53 | 0,341504509 |
| Tbc1d2     | -0,71 | 0,238936443 | -0,41 | 0,45420995  | -0,19 | 0,868125824 | 0,13  | 0,910298592 | 0,47  | 0,615772692 |
| Tbc1d20    | -0,38 | 0,356353147 | -0,47 | 0,286184895 | 0,08  | 0,925417014 | 0,63  | 0,224359493 | -0,24 | 0,743854135 |
| Tbc1d21    | -0,41 | 0,50685922  | -0,12 | 0,88928164  | 0,04  | 0,953951069 | 0     | 0,999997968 | -0,34 | 0,744117522 |
| Tbc1d22a   | 0,43  | 0,314833729 | 0,33  | 0,638535584 | -0,68 | 0,157041644 | -0,41 | 0,512594616 | -0,46 | 0,574285481 |
| Tbc1d22b   | -0,05 | 0,942440481 | -0,41 | 0,686540452 | 0,56  | 0,738890123 | 0,18  | 0,784099439 | -0,3  | 0,689607996 |
| Tbc1d22bos | -0,17 | 0,756141549 | -0,08 | 0,932292974 | 0,04  | 0,959505445 | -0,04 | 0,978717209 | -0,13 | 0,929312654 |
| Tbc1d23    | -0,07 | 0,953702758 | 0,23  | 0,829923566 | -0,34 | 0,662381139 | -0,01 | 0,992353899 | -0,07 | 0,939593587 |

|         |       |             |       |             |       |             |       |             |       |             |
|---------|-------|-------------|-------|-------------|-------|-------------|-------|-------------|-------|-------------|
| Tbc1d24 | -0,3  | 0,735860437 | 0,24  | 0,756165221 | -0,16 | 0,881924837 | -0,14 | 0,905282867 | -0,54 | 0,684349871 |
| Tbc1d25 | -0,14 | 0,847613888 | 0,11  | 0,946599376 | -0,19 | 0,877023506 | -0,3  | 0,690442683 | 0,12  | 0,927517199 |
| Tbc1d2b | -0,84 | 0,153755071 | -0,23 | 0,568282579 | 0,78  | 0,500343254 | -0,11 | 0,930116111 | -0,67 | 0,4940585   |
| Tbc1d30 | 0,49  | 0,655961186 | 1,16  | 0,087315688 | -0,2  | 0,830336321 | 0,49  | 0,649267216 | 0,57  | 0,702558142 |
| Tbc1d31 | -0,6  | 0,298607461 | -0,28 | 0,918694468 | 1,04  | 0,301089227 | 0,37  | 0,886422917 | -0,05 | 0,990905599 |
| Tbc1d32 | -0,11 | 0,940758951 | -0,17 | 0,900801202 | 0,18  | 0,886600095 | 0,93  | 0,407226548 | 0,65  | 0,615969748 |
| Tbc1d4  | -1,3  | 0,184172097 | -1,64 | 0,10752682  | 0,37  | 0,823823322 | -0,34 | 0,376776439 | -0,97 | 0,177261751 |
| Tbc1d5  | 0,28  | 0,518245839 | -0,24 | 0,723353163 | -0,21 | 0,661747229 | -0,28 | 0,578896547 | -0,36 | 0,623214829 |
| Tbc1d7  | -0,31 | 0,632053719 | -0,3  | 0,588131423 | 0,7   | 0,545431283 | 0,92  | 0,057964315 | -1,75 | 0,021111626 |
| Tbc1d8  | -0,49 | 0,389268664 | -0,38 | 0,399656446 | 0,49  | 0,329288211 | -0,15 | 0,777972613 | -0,99 | 0,220768726 |
| Tbc1d8b | -0,63 | 0,548094483 | -0,18 | 0,828818891 | 0,93  | 0,273645359 | 1,24  | 0,368725311 | 0,7   | 0,631479776 |
| Tbc1d9  | -0,07 | 0,924139727 | 0,13  | 0,831647298 | 0,73  | 0,330719676 | 3,82  | 0,024282032 | 0,82  | 0,559794251 |
| Tbc1d9b | -0,1  | 0,855264133 | -0,16 | 0,729741948 | 0,34  | 0,641366948 | 0,38  | 0,510589408 | -0,55 | 0,398637431 |
| Tbca    | -0,06 | 0,934682167 | 0,32  | 0,4009169   | 0,6   | 0,472308335 | 0,61  | 0,143104121 | 0,4   | 0,549181666 |
| Tbcb    | -0,14 | 0,724829885 | -0,06 | 0,946228006 | 0,44  | 0,353588425 | 0,37  | 0,657542921 | 0,44  | 0,616797608 |
| Tbcc    | -0,08 | 0,90308793  | -0,15 | 0,761404909 | -0,08 | 0,940335002 | -0,13 | 0,768796094 | 0     | 0,99589352  |
| Tbccd1  | -0,02 | 0,991919022 | 0,2   | 0,813235994 | -0,24 | 0,856605654 | -0,33 | 0,71429877  | 0,02  | 0,984125319 |
| Tbcd    | -0,62 | 0,218444456 | 0,05  | 0,961206626 | 0,03  | 0,978012085 | 0,53  | 0,384998966 | -0,04 | 0,975441362 |
| Tbce    | 0,27  | 0,679634012 | 0,24  | 0,755498335 | 0,35  | 0,607504628 | 0,1   | 0,920640884 | 0,29  | 0,689780577 |
| Tbcel   | 0,05  | 0,962399085 | 0,16  | 0,928565454 | 0,44  | 0,661747229 | -0,57 | 0,522511755 | -0,29 | 0,738219533 |
| Tbck    | -0,2  | 0,772855197 | 0,09  | 0,912535732 | -0,46 | 0,485752425 | -0,22 | 0,498550563 | -0,01 | 0,987603478 |
| Tbk1    | -0,02 | 0,976574175 | 0,27  | 0,765974961 | -0,62 | 0,381006373 | 0,2   | 0,843982538 | 0,63  | 0,469148703 |
| Tbkbp1  | 0,54  | 0,270547821 | 0,78  | 0,143690114 | -0,37 | 0,642542263 | -0,18 | 0,776545078 | 0,69  | 0,276336726 |
| Tbl1x   | -0,34 | 0,705457389 | -0,17 | 0,670859269 | 0,12  | 0,870377336 | 0,06  | 0,941611747 | 0,12  | 0,891991231 |
| Tbl1xr1 | -0,1  | 0,934802231 | 0,4   | 0,756778611 | 0,26  | 0,856605654 | -0,35 | 0,788818065 | 0,92  | 0,395349481 |
| Tbl2    | -0,23 | 0,724538829 | 0,25  | 0,748557287 | 0,27  | 0,750624323 | 0,16  | 0,800853287 | -0,08 | 0,947437555 |
| Tbl3    | -0,4  | 0,407100201 | -0,45 | 0,49125334  | 0,54  | 0,545465016 | 0,67  | 0,36787806  | -0,07 | 0,961764923 |
| Tbp     | -0,38 | 0,557053469 | -0,27 | 0,837035571 | -0,29 | 0,831266864 | -0,42 | 0,383204892 | 0,18  | 0,815693459 |
| Tbpl1   | 0,01  | 0,993728727 | 0,03  | 0,965147491 | 0,31  | 0,844651246 | 0,2   | 0,652349348 | 0,29  | 0,639050302 |
| Tbpl2   | 0,1   | 0,864212314 | 0     | 1           | 0,12  | 0,909233941 | 0,37  | 0,266024659 | 0,02  | 0,98587786  |
| Tbr1    | -0,14 | 0,840909921 | 0,36  | 0,814499098 | -0,15 | 0,911506558 | 0,1   | 0,884138056 | 0,17  | 0,860591136 |
| Tbrg1   | 0     | 0,997933333 | 0,15  | 0,750160982 | 0,24  | 0,663430276 | 0,83  | 0,181187575 | 0,53  | 0,429355511 |
| Tbrg3   | -0,13 | 0,87909897  | -0,23 | 0,650034357 | 0,13  | 0,909371204 | 0,02  | 0,979829655 | 0,27  | 0,782386442 |
| Tbrg4   | -0,08 | 0,909932316 | -0,24 | 0,674709201 | 0,39  | 0,433481425 | 0,72  | 0,143860446 | 0,23  | 0,731865047 |
| Tbx1    | -0,12 | 0,83565172  | 0,03  | 0,9860901   | -0,65 | 0,290996536 | -0,13 | 0,867221814 | -0,11 | 0,928775639 |

|         |       |             |       |             |       |             |       |             |       |             |
|---------|-------|-------------|-------|-------------|-------|-------------|-------|-------------|-------|-------------|
| Tbx10   | 0,24  | 0,702001327 | 0,67  | 0,563083992 | -0,36 | 0,669548016 | -0,43 | 0,62296101  | 0,05  | 0,951429597 |
| Tbx15   | -0,39 | 0,617280733 | -0,65 | 0,35496087  | 0,42  | 0,573933437 | 0,32  | 0,701167068 | -0,37 | 0,676132909 |
| Tbx18   | 0     | 0,998449912 | -0,02 | 0,976665596 | -0,4  | 0,616504992 | -0,08 | 0,926000142 | -0,09 | 0,934636927 |
| Tbx19   | 0,06  | 0,948087131 | 0,25  | 0,834508568 | 0,08  | 0,946845275 | -0,48 | 0,257502291 | -0,41 | 0,572768596 |
| Tbx2    | 0,06  | 0,949236157 | 0,09  | 0,929785201 | -0,12 | 0,83442082  | -1,24 | 0,027401066 | -0,18 | 0,817625207 |
| Tbx20   | 0,12  | 0,814888638 | 0,33  | 0,629493333 | -0,04 | 0,956164479 | 0,03  | 0,965664624 | 0     | 0,996085757 |
| Tbx21   | 0,26  | 0,659457675 | 0,02  | 0,987188179 | -0,35 | 0,487127071 | 0,08  | 0,913094241 | 0,35  | 0,685602077 |
| Tbx22   | -0,24 | 0,685826767 | 0,64  | 0,286184895 | -0,02 | 0,986872007 | -0,73 | 0,11333282  | -0,12 | 0,900126162 |
| Tbx3    | -0,25 | 0,791021845 | 0,06  | 0,948314657 | 0,1   | 0,916403684 | -1,11 | 0,205895339 | -0,02 | 0,986971861 |
| Tbx3os1 | -0,59 | 0,635319629 | -0,2  | 0,900801202 | 0,19  | 0,883534784 | -1,18 | 0,139498624 | 0,36  | 0,759948291 |
| Tbx3os2 | 0,37  | 0,608455671 | -0,06 | 0,899496232 | -0,01 | 0,994218677 | 0,36  | 0,469495727 | -0,2  | 0,726042963 |
| Tbx4    | 0,52  | 0,508688727 | 0,57  | 0,539700767 | -0,09 | 0,94768286  | -0,23 | 0,737087309 | 0,22  | 0,836061657 |
| Tbx5    | -0,04 | 0,955403502 | -0,34 | 0,708738408 | 0,16  | 0,79085032  | -0,33 | 0,615580787 | -0,32 | 0,802618378 |
| Tbx6    | 0,11  | 0,834672627 | -0,07 | 0,938088718 | -0,72 | 0,478875784 | -0,14 | 0,83280418  | -0,52 | 0,32673984  |
| Tbxa2r  | -0,62 | 0,189684245 | 0,08  | 0,868839934 | -0,43 | 0,622889541 | -2,04 | 0,007149669 | -0,81 | 0,11052218  |
| Tbxas1  | 0,04  | 0,95176371  | 0,35  | 0,733180951 | 0,36  | 0,65528516  | -1,59 | 0,087185242 | -0,05 | 0,975441362 |
| Tc2n    | 0,29  | 0,717603132 | 0,12  | 0,882589938 | -1,12 | 0,350153743 | -1,08 | 0,102474181 | -0,04 | 0,97934071  |
| Tcaf1   | -0,61 | 0,559760851 | -0,59 | 0,526101975 | -0,05 | 0,970387898 | -0,09 | 0,890998042 | -0,34 | 0,694233384 |
| Tcaf2   | -0,99 | 0,251832189 | -0,91 | 0,100303734 | 0,56  | 0,623318039 | 1,18  | 0,206882609 | -0,33 | 0,816305974 |
| Tcaf3   | 0,5   | 0,389909576 | -0,16 | 0,890738011 | -0,04 | 0,970308056 | -0,04 | 0,971438783 | -0,32 | 0,763240477 |
| Tcaim   | -0,1  | 0,908281692 | -0,1  | 0,827228251 | -0,39 | 0,628427952 | 0,05  | 0,909697685 | -0,2  | 0,823098095 |
| Tcam1   | 0,43  | 0,499947366 | -0,05 | 0,942965593 | -0,17 | 0,859411859 | 0,22  | 0,731281458 | -0,02 | 0,990905599 |
| Tcap    | -0,21 | 0,661010124 | -0,13 | 0,853569707 | -0,34 | 0,574125052 | 0,17  | 0,636945912 | 0,2   | 0,734725045 |
| Tcea1   | 0,09  | 0,84900712  | 0,04  | 0,981075015 | -0,08 | 0,946237452 | 0,34  | 0,379392822 | 0,22  | 0,724669859 |
| Tcea2   | -0,48 | 0,634025092 | 0,46  | 0,49599855  | 0,16  | 0,891047835 | -0,47 | 0,347951638 | -0,23 | 0,808285534 |
| Tcea3   | 0,07  | 0,948926586 | 0,78  | 0,485712513 | 1,06  | 0,041860694 | -0,75 | 0,37071509  | -0,64 | 0,511962622 |
| Tceal1  | -0,32 | 0,808947569 | 0,53  | 0,366674056 | 0,36  | 0,700061351 | -1,58 | 0,04747896  | 0,34  | 0,757428993 |
| Tceal5  | -0,12 | 0,846313357 | 0,62  | 0,48113885  | -0,11 | 0,85427147  | -0,62 | 0,13394272  | -0,2  | 0,879075155 |
| Tceal6  | 0,13  | 0,869225685 | -0,03 | 0,982786635 | -0,42 | 0,506222058 | 0,17  | 0,764489444 | 0,31  | 0,635612479 |
| Tceal7  | -0,35 | 0,500870793 | 0,32  | 0,68249752  | -0,03 | 0,978012085 | -0,27 | 0,594263953 | -0,2  | 0,800540569 |
| Tceal8  | -0,59 | 0,798244283 | -1,53 | 0,272116352 | 0,41  | 0,771729329 | 1,74  | 0,243098785 | 0,99  | 0,533119029 |
| Tceanc  | 0,83  | 0,275936037 | 0,12  | 0,947684955 | -0,27 | 0,661075357 | -0,77 | 0,259970167 | -0,38 | 0,712786855 |
| Tceanc2 | 0,79  | 0,132779189 | 0,3   | 0,744776669 | -0,35 | 0,791814863 | -0,4  | 0,420869535 | 0,03  | 0,979851387 |
| Tceb1   | 0,02  | 0,979827119 | 0,08  | 0,896065393 | -0,32 | 0,501664412 | 0,45  | 0,226158677 | 0,14  | 0,820657685 |
| Tceb2   | 0,17  | 0,67806773  | -0,22 | 0,631511605 | 0,28  | 0,625457487 | 0,29  | 0,626884812 | -0,14 | 0,886027227 |



|         |       |             |       |             |       |             |       |             |       |             |
|---------|-------|-------------|-------|-------------|-------|-------------|-------|-------------|-------|-------------|
| Tceb3   | -0,18 | 0,692118638 | 0,16  | 0,756778611 | 0,32  | 0,500075811 | 0,16  | 0,776545078 | -0,29 | 0,654121765 |
| Tcerg1  | -0,36 | 0,341853862 | -0,34 | 0,490598951 | 0,07  | 0,926974012 | 0,57  | 0,24812886  | 0,18  | 0,825990389 |
| Tcerg11 | 0,18  | 0,87350924  | 0,6   | 0,362188015 | 0,36  | 0,642027817 | -0,79 | 0,081554973 | -0,47 | 0,476496602 |
| Tcf12   | -0,03 | 0,958188047 | -0,04 | 0,959837002 | -0,1  | 0,928301121 | 0,03  | 0,96939036  | 0     | 0,99981982  |
| Tcf15   | -0,37 | 0,438932987 | 0,13  | 0,785153081 | -0,19 | 0,85092959  | -0,82 | 0,059730804 | 0,05  | 0,952718905 |
| Tcf19   | -0,3  | 0,779331628 | -0,52 | 0,521685055 | 0,43  | 0,711472088 | 0,64  | 0,174313619 | -0,6  | 0,323249283 |
| Tcf20   | -0,23 | 0,68223979  | -0,15 | 0,730244888 | 0,25  | 0,667052393 | 0,3   | 0,323734403 | 0,04  | 0,955784619 |
| Tcf21   | -0,07 | 0,914090929 | 0,29  | 0,62432723  | -0,16 | 0,786838878 | -0,58 | 0,177452749 | -0,15 | 0,861236592 |
| Tcf23   | -0,64 | 0,122600587 | -0,01 | 0,99305294  | -0,09 | 0,938571299 | -1,12 | 0,048096343 | -0,57 | 0,496796933 |
| Tcf24   | 0,22  | 0,665625405 | -0,12 | 0,807175471 | -0,12 | 0,859411859 | 0,03  | 0,954910308 | -0,07 | 0,934738565 |
| Tcf25   | -0,11 | 0,783200207 | -0,07 | 0,899624796 | 0,2   | 0,698473929 | 0,13  | 0,703831158 | -0,06 | 0,940149515 |
| Tcf3    | -0,54 | 0,203168309 | -0,4  | 0,365822265 | 0,72  | 0,093530523 | 0,51  | 0,163135163 | -0,26 | 0,6754671   |
| Tcf4    | -0,08 | 0,885454028 | -0,02 | 0,981196932 | -0,3  | 0,600679499 | 0,16  | 0,657542921 | -0,31 | 0,565817768 |
| Tcf7    | 1,05  | 0,074890017 | 0,64  | 0,19876663  | -0,69 | 0,276693782 | -0,94 | 0,061569622 | 1,64  | 0,041040337 |
| Tcf7l1  | -0,8  | 0,27593947  | -0,46 | 0,583200444 | 0,31  | 0,599202081 | -1,42 | 0,035059836 | -0,84 | 0,163953683 |
| Tcf7l2  | 0,02  | 0,98297164  | 0,21  | 0,804611595 | 0,08  | 0,949039966 | 0,83  | 0,180740963 | 0,31  | 0,680384389 |
| Tcf15   | 0,11  | 0,875555348 | -0,3  | 0,815022365 | -0,3  | 0,533486746 | 0,26  | 0,829087694 | 0     | 0,998444219 |
| Tchh    | 0,11  | 0,916074217 | -0,04 | 0,947107147 | 0,01  | 0,993379272 | -1,06 | 0,128741731 | 0,12  | 0,905446784 |
| Tchhl1  | -0,27 | 0,549420541 | 0,41  | 0,684980945 | 0,38  | 0,51127708  | -0,2  | 0,758588473 | 0,12  | 0,928724353 |
| Tchp    | 0,14  | 0,851543807 | 0,11  | 0,926353869 | -0,16 | 0,798320169 | -0,16 | 0,861140391 | -0,15 | 0,858526809 |
| Tc1rg1  | 0,55  | 0,376151377 | 0,74  | 0,231183878 | -0,12 | 0,906097666 | 0,27  | 0,638514768 | 0,11  | 0,896355106 |
| Tcl1    | -0,1  | 0,903102299 | -0,03 | 0,978741224 | 0,11  | 0,847178115 | 0,2   | 0,679295468 | 0,04  | 0,969117862 |
| Tcl1b1  | -0,1  | 0,916792859 | 0,23  | 0,682189381 | -0,19 | 0,822852885 | 0,3   | 0,702534189 | 0,61  | 0,448887062 |
| Tcl1b2  | 0,88  | 0,290377514 | -0,25 | 0,728434379 | -1,14 | 0,2034553   | 0,21  | 0,532393687 | -0,31 | 0,74624632  |
| Tcl1b3  | -0,18 | 0,702406672 | -0,01 | 0,990654073 | -0,36 | 0,653810439 | -0,06 | 0,911343784 | -0,01 | 0,992584094 |
| Tcl1b4  | 0,15  | 0,832696131 | 0,17  | 0,762968641 | -0,18 | 0,862869965 | -0,3  | 0,437773588 | -0,34 | 0,763240477 |
| Tcl1b5  | 0,44  | 0,489042022 | -0,18 | 0,842793123 | -0,38 | 0,446533009 | 0,15  | 0,716478691 | 0,35  | 0,510495103 |
| Tcn2    | 0     | 0,996673094 | -0,2  | 0,771641267 | 0,48  | 0,667986422 | -1,31 | 0,024850224 | -0,54 | 0,376217331 |
| Tcof1   | -0,33 | 0,429645338 | -0,33 | 0,540952673 | 0,25  | 0,746677927 | 0,09  | 0,827570958 | -0,16 | 0,797293554 |
| Tcp1    | -0,08 | 0,907391935 | -0,08 | 0,916730432 | 0,27  | 0,545431283 | 0,98  | 0,025068521 | 0,44  | 0,386757729 |
| Tcp10a  | 0,93  | 0,189644465 | -0,17 | 0,974731741 | -1,1  | 0,243511638 | 0,05  | 0,984136649 | -0,25 | 0,817544259 |
| Tcp10b  | -0,15 | 0,909885273 | -0,19 | 0,886728509 | -0,79 | 0,565218046 | -0,48 | 0,35953164  | 0,37  | 0,878471553 |
| Tcp10c  | -0,15 | 0,886406719 | 1,21  | 0,277568816 | 0,13  | 0,909371204 | -0,21 | 0,66448476  | 0,85  | 0,564320697 |
| Tcp11   | 0,27  | 0,662416763 | 0,54  | 0,530207532 | 0,17  | 0,82162081  | -0,04 | 0,967866794 | 0,61  | 0,433916911 |
| Tcp11l1 | -0,27 | 0,624481073 | -0,56 | 0,509013394 | 0,65  | 0,472884091 | -0,38 | 0,487308323 | -0,06 | 0,962631948 |

|            |       |             |       |             |       |             |       |             |       |             |
|------------|-------|-------------|-------|-------------|-------|-------------|-------|-------------|-------|-------------|
| Tcp11l2    | 0,21  | 0,678857468 | 0,04  | 0,98459889  | -0,02 | 0,991240121 | -1,28 | 0,064024514 | -0,15 | 0,831108986 |
| Tcp11x2    | 0,26  | 0,520545783 | 0,05  | 0,979551751 | 0,16  | 0,95633676  | 0,07  | 0,928203787 | 0,1   | 0,881613493 |
| Tcra-V22.1 | 0,21  | 0,705173108 | 0,2   | 0,785543886 | 0,11  | 0,873740233 | -0,18 | 0,57372642  | -0,1  | 0,884244347 |
| Tcrb-J     | 0,23  | 0,595466702 | 0,08  | 0,89034555  | 0     | 0,998479176 | -0,35 | 0,414181154 | -0,03 | 0,978981442 |
| Tcrg-V1    | -0,05 | 0,937251448 | 0,06  | 0,937377463 | -0,66 | 0,614237718 | -0,6  | 0,57069357  | -0,01 | 0,994116818 |
| Tcrg-V4    | -0,34 | 0,612955561 | -0,88 | 0,671319666 | -0,84 | 0,063243606 | 0,52  | 0,728249817 | 0,53  | 0,749647826 |
| Tcrg-V5    | -0,03 | 0,96094566  | 0,21  | 0,67317894  | -0,02 | 0,980801972 | -0,27 | 0,525704234 | -0,18 | 0,781860531 |
| Tcrg-V6    | 0,24  | 0,645057952 | -0,04 | 0,938233008 | -0,09 | 0,89935302  | 0,03  | 0,945487259 | -0,06 | 0,95421799  |
| Tcrg-V7    | 0,28  | 0,763657448 | -0,22 | 0,795115597 | -0,02 | 0,976991108 | 0,08  | 0,843922409 | 0,03  | 0,975441362 |
| Tcstv1     | 0,25  | 0,654203085 | 0,01  | 0,994137877 | -0,36 | 0,647988621 | 0,02  | 0,965524724 | 0,16  | 0,825564898 |
| Tcstv3     | -0,08 | 0,902574268 | -0,08 | 0,912604822 | -0,37 | 0,643853175 | 0,27  | 0,502511554 | -0,01 | 0,987948597 |
| Tcta       | 0,03  | 0,971245076 | 0,35  | 0,494666675 | 0,01  | 0,993379272 | -1,44 | 0,081302289 | -0,05 | 0,974553568 |
| Tcte1      | 0,19  | 0,808947569 | 0,28  | 0,855974935 | -0,31 | 0,561271294 | -0,07 | 0,957596559 | 0,22  | 0,765327693 |
| Tcte2      | -0,02 | 0,970286316 | 0,19  | 0,807175471 | -0,19 | 0,746920897 | -0,31 | 0,460652402 | -0,41 | 0,554986759 |
| Tctex1d1   | 0,13  | 0,84988108  | 0,42  | 0,459231649 | 0,31  | 0,639976167 | -0,07 | 0,922691243 | 0,44  | 0,4940585   |
| Tctex1d2   | -0,27 | 0,612955561 | -0,31 | 0,558135871 | 0,67  | 0,623447121 | 0,66  | 0,128119399 | -0,43 | 0,456564217 |
| Tctex1d4   | 0,44  | 0,381895665 | 0,32  | 0,651611182 | -0,13 | 0,897233315 | -0,03 | 0,962528932 | -0,09 | 0,937446198 |
| Tctn1      | 0,65  | 0,172698611 | 0,13  | 0,872330696 | 0,39  | 0,424460876 | -0,36 | 0,370726303 | -0,48 | 0,281633932 |
| Tctn2      | -0,26 | 0,496008309 | 0     | 1           | -0,04 | 0,95907725  | 0,64  | 0,263927906 | -0,08 | 0,91314596  |
| Tctn3      | -0,58 | 0,318041432 | 0,29  | 0,530213785 | -0,13 | 0,931176554 | 0,18  | 0,797914158 | -0,14 | 0,949178165 |
| TdGF1      | -0,08 | 0,905414735 | -0,15 | 0,909975293 | -0,2  | 0,853040826 | 0,2   | 0,82237355  | 0,49  | 0,450543672 |
| Tdh        | 0,16  | 0,793166737 | 0,09  | 0,896187678 | -0,16 | 0,805598605 | -0,01 | 0,991334473 | 0,32  | 0,641928139 |
| Tdo2       | 0,09  | 0,893283341 | -0,48 | 0,629397507 | -0,32 | 0,621363256 | 0,43  | 0,308476443 | -0,01 | 0,98653183  |
| Tdp1       | -0,43 | 0,480280008 | -0,92 | 0,302028989 | 0,02  | 0,987245628 | 0,69  | 0,080279239 | -0,3  | 0,602836525 |
| Tdp2       | -0,07 | 0,942119638 | -0,41 | 0,645276511 | 0,42  | 0,637835827 | 0,2   | 0,683145584 | -0,09 | 0,935510217 |
| Tdpoz1     | 0,61  | 0,59648949  | 0,29  | 0,651587568 | -0,29 | 0,749874602 | -0,61 | 0,159593558 | -0,01 | 0,991628025 |
| Tdpoz2     | -0,05 | 0,944291635 | -0,35 | 0,483507011 | -0,42 | 0,712697139 | 0,77  | 0,043005725 | -0,09 | 0,944070399 |
| Tdpoz3     | 0,08  | 0,923694449 | 0,06  | 0,90164068  | -0,24 | 0,702689055 | 0,05  | 0,89461226  | -0,07 | 0,933759514 |
| Tdpoz4     | 0,19  | 0,65525391  | 0,07  | 0,88481608  | -0,17 | 0,72066129  | -0,09 | 0,856878607 | 0,41  | 0,469594536 |
| Tdrd1      | 0,34  | 0,482077988 | -0,5  | 0,536821393 | 0,02  | 0,983917018 | 0,34  | 0,447310044 | 0,18  | 0,827032122 |
| Tdrd12     | -0,09 | 0,932531737 | 0,12  | 0,930253753 | 0,22  | 0,853517291 | 0,5   | 0,482483122 | 0,47  | 0,389664866 |
| Tdrd3      | -0,2  | 0,848780666 | -0,51 | 0,345409693 | -0,26 | 0,775163644 | -0,24 | 0,623245048 | -0,05 | 0,961303869 |
| Tdrd5      | 0     | 0,998027251 | -0,05 | 0,974159037 | -0,05 | 0,947460329 | -0,12 | 0,773449759 | -0,12 | 0,876634949 |
| Tdrd6      | 0,17  | 0,795051842 | -0,27 | 0,789363581 | -0,28 | 0,750027264 | -0,07 | 0,924492971 | 0,36  | 0,623214829 |
| Tdrd7      | 0,66  | 0,151176484 | 0,96  | 0,273305294 | -0,49 | 0,650923782 | 0     | 1           | 0,49  | 0,507400689 |

|         |       |             |       |             |       |             |       |             |       |             |
|---------|-------|-------------|-------|-------------|-------|-------------|-------|-------------|-------|-------------|
| Tdrd9   | -0,14 | 0,800209334 | -0,52 | 0,311904351 | -0,19 | 0,779970041 | 0,27  | 0,641461166 | -0,41 | 0,563077271 |
| Tdrkh   | 0,01  | 0,991919022 | -0,21 | 0,860629851 | 0,21  | 0,751758339 | -0,29 | 0,606018577 | 0,05  | 0,956610289 |
| Tdrp    | -1,25 | 0,074890017 | 0,5   | 0,732847182 | -0,4  | 0,797272969 | -1,8  | 0,04687876  | 0,32  | 0,85036399  |
| Tead1   | 0,03  | 0,978298504 | -0,14 | 0,907167997 | 0,06  | 0,952888594 | 0,28  | 0,677756558 | -0,11 | 0,929312654 |
| Tead2   | -0,76 | 0,215251359 | -0,75 | 0,360324171 | 1,1   | 0,172712848 | -0,3  | 0,728067633 | -0,09 | 0,940125698 |
| Tead3   | -0,03 | 0,973883276 | 0,13  | 0,796206036 | 0,63  | 0,443341184 | -0,49 | 0,30409281  | 0,09  | 0,934185668 |
| Tead4   | -0,12 | 0,821267687 | -0,29 | 0,55011938  | -0,22 | 0,710623413 | -0,02 | 0,978960493 | 0,32  | 0,555736589 |
| Tec     | 0,58  | 0,357054834 | 1,04  | 0,231416775 | -0,27 | 0,717856288 | 0,17  | 0,829591443 | 0,89  | 0,319238316 |
| Tecpr1  | -0,38 | 0,504081209 | -0,06 | 0,966078321 | -0,2  | 0,809137779 | -0,71 | 0,358795481 | -0,41 | 0,61355523  |
| Tecpr2  | -0,1  | 0,892823025 | -0,46 | 0,377669413 | 0,54  | 0,404341148 | 0,14  | 0,872449009 | -0,32 | 0,765809384 |
| Tecr    | -0,29 | 0,491531635 | -0,36 | 0,342437435 | 0,34  | 0,530318769 | 0     | 0,997771107 | -0,33 | 0,4940585   |
| Tecrl   | 0,42  | 0,301180874 | 0,29  | 0,544440118 | 0,06  | 0,941978727 | -1,33 | 0,296784007 | -1,17 | 0,324093515 |
| Tecta   | -0,31 | 0,791295946 | -0,22 | 0,673294705 | -0,01 | 0,990836784 | 0,1   | 0,903152864 | 0,02  | 0,984065984 |
| Tectb   | 0,18  | 0,666191847 | -0,19 | 0,716520032 | 0,12  | 0,894018349 | -0,06 | 0,921731995 | -0,25 | 0,694233384 |
| Teddm1a | 0,19  | 0,783200207 | 0,14  | 0,764406705 | -0,31 | 0,612239485 | -0,11 | 0,786750698 | 0,08  | 0,915238726 |
| Teddm1b | -0,06 | 0,916217568 | 0,1   | 0,828219939 | -0,04 | 0,956570063 | -0,19 | 0,750956508 | -0,16 | 0,839474287 |
| Teddm2  | -0,26 | 0,72556358  | -0,44 | 0,468035796 | 0,07  | 0,943900332 | 0,26  | 0,673774936 | 0,25  | 0,731927583 |
| Teddm3  | -0,01 | 0,992758399 | 0,02  | 0,972150454 | -0,2  | 0,772397144 | -0,01 | 0,981203009 | 0,23  | 0,738260196 |
| Tef     | -0,32 | 0,596550801 | -0,11 | 0,926157704 | -0,07 | 0,940489823 | -0,19 | 0,886806548 | -0,17 | 0,928724353 |
| Tefm    | -0,02 | 0,981412917 | 0,18  | 0,883639748 | 0,39  | 0,660561609 | 0,24  | 0,859466831 | 0,39  | 0,712901882 |
| Tek     | -1,1  | 0,278797445 | -0,89 | 0,147932554 | 0,63  | 0,201561559 | -2,07 | 0,006833849 | -0,59 | 0,209387396 |
| Tekt1   | 0,29  | 0,606922012 | 0,04  | 0,980518468 | 0,23  | 0,756257368 | -0,34 | 0,472796215 | 0,03  | 0,977236465 |
| Tekt2   | -0,27 | 0,497466519 | 0,74  | 0,517288934 | -0,33 | 0,758182762 | -0,38 | 0,715042501 | 0,04  | 0,980945466 |
| Tekt3   | 0,46  | 0,456603923 | 0,48  | 0,445210372 | 0,05  | 0,961293403 | -0,03 | 0,969193633 | -0,04 | 0,972231257 |
| Tekt4   | -0,06 | 0,925019201 | -0,02 | 0,99149407  | -0,21 | 0,770526999 | 0,08  | 0,876246814 | -0,05 | 0,960610384 |
| Tekt5   | 0,22  | 0,584537494 | 0,04  | 0,974580396 | -0,04 | 0,964509282 | 0,18  | 0,868771357 | -0,03 | 0,985464028 |
| Telo2   | -1,01 | 0,336952388 | -0,21 | 0,84526289  | -0,08 | 0,932577939 | 0,32  | 0,572635263 | -0,07 | 0,939948423 |
| Ten1    | -0,12 | 0,948538969 | -0,04 | 0,968420598 | -0,5  | 0,493193538 | 0,17  | 0,883575155 | -0,3  | 0,789294096 |
| Tenm1   | 0,51  | 0,277313998 | 0,17  | 0,731912687 | -0,3  | 0,703468807 | 0,22  | 0,742313334 | 0,56  | 0,479698242 |
| Tenm2   | -0,7  | 0,179001759 | -0,11 | 0,854387235 | -0,13 | 0,904844142 | -0,11 | 0,778212842 | -0,38 | 0,622910734 |
| Tenm3   | 0,2   | 0,803291325 | -0,28 | 0,750555245 | 0,71  | 0,379638471 | -0,28 | 0,50808678  | -0,17 | 0,848589284 |
| Tenm4   | 0,08  | 0,919078344 | 0,08  | 0,909161274 | 1,16  | 0,044715282 | -0,31 | 0,552259152 | -0,02 | 0,987680175 |
| Tep1    | 0,01  | 0,992774066 | -0,01 | 0,993789602 | -0,09 | 0,91378871  | 0,38  | 0,34860346  | 0,05  | 0,963556667 |
| Tepp    | 0,3   | 0,594113632 | 0,25  | 0,581228206 | 0,27  | 0,76031147  | -0,17 | 0,700431952 | -0,2  | 0,77959286  |
| Terc    | 0,43  | 0,498330333 | 0,03  | 0,975959817 | 0,46  | 0,646965864 | -0,37 | 0,557149783 | -0,24 | 0,707962968 |

|         |       |             |       |             |       |             |       |             |       |             |
|---------|-------|-------------|-------|-------------|-------|-------------|-------|-------------|-------|-------------|
| Terf1   | -0,68 | 0,173359555 | -0,05 | 0,9563413   | 0,52  | 0,598378377 | -0,18 | 0,758588473 | -0,15 | 0,898185407 |
| Terf2   | -0,39 | 0,501334077 | -0,43 | 0,271555794 | 0,08  | 0,937566473 | 0,08  | 0,864379203 | -0,09 | 0,925744028 |
| Terf2ip | -0,46 | 0,364497258 | -0,86 | 0,218601437 | 0,3   | 0,598179126 | -0,08 | 0,961256604 | 0,08  | 0,965348932 |
| Tert    | -0,02 | 0,979827119 | 0,1   | 0,952327737 | 0,03  | 0,978657055 | 0,09  | 0,879670655 | 0,02  | 0,980945466 |
| Tes     | 0,15  | 0,886889675 | 0,14  | 0,831404974 | 0,81  | 0,112229182 | 0,98  | 0,051131382 | -0,54 | 0,442056784 |
| Tes3-ps | 0,01  | 0,995482647 | 0,2   | 0,801609076 | -0,21 | 0,757498725 | -0,1  | 0,85846312  | 0,2   | 0,842050801 |
| Tesc    | -0,15 | 0,768063481 | -0,35 | 0,530158115 | 0,22  | 0,830300038 | -0,54 | 0,195204042 | -0,56 | 0,278863058 |
| Tescl   | 0,01  | 0,993728727 | -0,01 | 0,997289115 | -0,06 | 0,943365715 | -0,1  | 0,908141892 | 0,31  | 0,62559702  |
| Tesk1   | -0,24 | 0,719765184 | 0,06  | 0,974223336 | -0,06 | 0,970992385 | -0,12 | 0,819940884 | -0,25 | 0,745958051 |
| Tesk2   | -0,15 | 0,834764268 | 0,19  | 0,872388615 | 0,33  | 0,685713113 | -0,42 | 0,469495727 | -0,83 | 0,168532878 |
| Tespa1  | 0,15  | 0,828767158 | -0,17 | 0,76791538  | -0,46 | 0,685155077 | 0,12  | 0,807358183 | -0,11 | 0,875713596 |
| Tet1    | -0,49 | 0,198561534 | -0,45 | 0,443880886 | 0,15  | 0,906501943 | -0,58 | 0,426759693 | -0,4  | 0,642882589 |
| Tet2    | 0,15  | 0,808947569 | 0,17  | 0,849511429 | 0,1   | 0,906097666 | 0,08  | 0,951947057 | 0,06  | 0,969937563 |
| Tet3    | -0,68 | 0,235475031 | -0,2  | 0,725783826 | 0,63  | 0,225213429 | 0,07  | 0,911611841 | -0,77 | 0,163175752 |
| Tex10   | 0,05  | 0,949264674 | 0,22  | 0,806959399 | 0,18  | 0,879127552 | 0,85  | 0,103099267 | 0,78  | 0,119306657 |
| Tex101  | 0,43  | 0,249818981 | -0,35 | 0,384803204 | 0,04  | 0,97548193  | -0,25 | 0,779547737 | -0,18 | 0,839474287 |
| Tex11   | -0,06 | 0,95290436  | -0,15 | 0,869673273 | -0,2  | 0,703045192 | 0,21  | 0,629613169 | -0,29 | 0,696438684 |
| Tex12   | 0,23  | 0,658266451 | 0,18  | 0,750811049 | -0,05 | 0,944266382 | -0,21 | 0,594037577 | -0,12 | 0,869113953 |
| Tex13   | 0,09  | 0,925019201 | 0,13  | 0,908448947 | -0,04 | 0,967767582 | 0     | 0,996606419 | -0,08 | 0,935812103 |
| Tex13a  | 0,23  | 0,70137787  | 0,01  | 0,993789602 | 0,06  | 0,975119638 | -0,04 | 0,943864463 | -0,59 | 0,341238778 |
| Tex14   | 0,62  | 0,407600798 | -0,14 | 0,77046207  | 0,3   | 0,703647945 | 0,18  | 0,667619348 | 0,14  | 0,911850421 |
| Tex15   | 0,17  | 0,892823025 | 0,29  | 0,658438786 | -0,24 | 0,716022963 | 0,28  | 0,373240819 | 0,3   | 0,583799665 |
| Tex16   | 0,01  | 0,991919022 | -0,21 | 0,646170664 | -0,06 | 0,940068173 | -0,01 | 0,994517874 | 0,38  | 0,583064152 |
| Tex18   | 0,01  | 0,993728727 | 0     | 1           | -0,03 | 0,969844657 | -0,05 | 0,902095386 | 0,19  | 0,723883531 |
| Tex19.1 | -0,4  | 0,595047797 | -0,25 | 0,861828582 | -0,31 | 0,769583333 | 0,34  | 0,540549201 | 0,9   | 0,164885525 |
| Tex19.2 | 0,13  | 0,798333389 | -0,15 | 0,77148563  | -0,15 | 0,823823322 | 0,17  | 0,700672606 | 0,18  | 0,806246741 |
| Tex2    | 0,14  | 0,836107067 | 0,32  | 0,764491894 | -0,05 | 0,962216849 | 0,47  | 0,533941098 | 0,33  | 0,710864518 |
| Tex21   | 0,09  | 0,905414735 | -0,54 | 0,666285906 | 0,09  | 0,917637235 | 0,07  | 0,957432042 | -0,4  | 0,502522199 |
| Tex22   | 0,09  | 0,899550586 | 0,06  | 0,956934125 | -0,22 | 0,782988471 | 0,11  | 0,90300812  | 0,01  | 0,991628025 |
| Tex24   | 0,12  | 0,907008083 | -0,01 | 0,995205602 | -0,11 | 0,8768401   | -0,09 | 0,928062506 | -0,31 | 0,587735967 |
| Tex26   | 0,24  | 0,62872508  | 0,07  | 0,893816641 | 0,02  | 0,977290724 | 0,11  | 0,825017636 | 0,26  | 0,655657337 |
| Tex261  | -0,69 | 0,205216327 | -0,56 | 0,464360937 | 0,77  | 0,172712848 | -0,2  | 0,726040578 | -0,7  | 0,201490663 |
| Tex264  | 0,96  | 0,074890017 | 0,24  | 0,738199172 | 0,37  | 0,557023998 | 0,01  | 0,988205241 | 0,29  | 0,698711798 |
| Tex28   | 0,23  | 0,59710379  | 0,26  | 0,625081288 | -0,15 | 0,829543101 | -0,23 | 0,477211575 | -0,11 | 0,855281866 |
| Tex29   | 0,75  | 0,375264691 | 0,07  | 0,974580396 | 0,16  | 0,923350407 | 0,4   | 0,692059018 | -0,94 | 0,407585638 |

|         |       |             |       |             |       |             |       |             |       |             |
|---------|-------|-------------|-------|-------------|-------|-------------|-------|-------------|-------|-------------|
| Tex30   | -0,24 | 0,695313784 | -0,23 | 0,688585656 | 0,79  | 0,055857939 | 0,42  | 0,251846723 | 0,53  | 0,306747854 |
| Tex33   | -0,05 | 0,960887203 | 0,17  | 0,732847182 | -0,13 | 0,900287506 | -0,17 | 0,736730464 | 0,22  | 0,830813323 |
| Tex35   | 0,63  | 0,148685247 | -0,36 | 0,603510049 | 0,72  | 0,184164925 | 0,97  | 0,148636521 | -0,67 | 0,587305934 |
| Tex36   | -0,07 | 0,904043614 | 0,15  | 0,794404033 | -0,02 | 0,990836784 | -0,14 | 0,710688722 | -0,32 | 0,525018839 |
| Tex37   | 0,07  | 0,899079341 | -0,06 | 0,900801202 | 0,01  | 0,99407001  | 0,13  | 0,746580621 | 0,21  | 0,845872843 |
| Tex38   | 0,17  | 0,808947569 | 0,22  | 0,736902992 | 0,18  | 0,714263358 | -0,05 | 0,909976349 | -0,08 | 0,916841901 |
| Tex40   | -0,04 | 0,963177119 | 0,06  | 0,917623085 | -0,03 | 0,979791644 | 0,05  | 0,95852873  | 0,29  | 0,734750869 |
| Tex43   | 0,28  | 0,68887575  | -0,17 | 0,882931058 | -0,01 | 0,996260936 | 0     | 1           | -0,24 | 0,669861917 |
| Tex9    | -0,15 | 0,909164786 | -0,26 | 0,79526023  | 0,03  | 0,973802765 | 0,65  | 0,469174985 | 0,19  | 0,929312654 |
| Tfam    | 0,42  | 0,482952136 | -0,5  | 0,537538565 | 0,43  | 0,774292895 | 1,09  | 0,330477168 | -0,04 | 0,984125319 |
| Tfap2a  | 0,33  | 0,498717216 | 0,44  | 0,779825075 | 1     | 0,295720005 | -0,31 | 0,555880182 | 0,03  | 0,979392852 |
| Tfap2b  | 0,18  | 0,831744184 | -0,45 | 0,426168855 | -0,33 | 0,586522241 | -0,11 | 0,882244533 | -0,49 | 0,428613647 |
| Tfap2c  | 0,2   | 0,707111377 | 0,22  | 0,576723643 | 0,21  | 0,684745645 | -0,01 | 0,984917022 | 0,33  | 0,635418734 |
| Tfap2d  | 0,07  | 0,948926586 | 0,45  | 0,627228272 | 0,18  | 0,758166018 | -0,43 | 0,550164397 | 0,08  | 0,951429597 |
| Tfap2e  | 0,2   | 0,799145501 | -0,09 | 0,938638797 | -0,53 | 0,389841181 | -0,54 | 0,431801951 | -0,4  | 0,622910734 |
| Tfap4   | -0,1  | 0,892823025 | 0,16  | 0,708497748 | 0,14  | 0,869040655 | -0,28 | 0,698362346 | -0,15 | 0,840036408 |
| Tfb1m   | 0,37  | 0,757032046 | 0,19  | 0,882847123 | 0,26  | 0,779859477 | -1,66 | 0,124498386 | 0,3   | 0,830263037 |
| Tfb2m   | 0,44  | 0,414026998 | -0,56 | 0,760679726 | 0,03  | 0,993379272 | -0,43 | 0,465441751 | 0,09  | 0,956610289 |
| Tfcp2   | -0,16 | 0,923035054 | -0,51 | 0,470343559 | -0,49 | 0,532446034 | 0,38  | 0,444671197 | -0,56 | 0,280215047 |
| Tfcp2l1 | -0,47 | 0,61300824  | -0,63 | 0,297047741 | 0,6   | 0,638066726 | -0,5  | 0,640127733 | -0,02 | 0,991980521 |
| Tfdp1   | -0,48 | 0,264165327 | -0,92 | 0,109267475 | 1,2   | 0,087837853 | 1,34  | 0,01842722  | -0,37 | 0,545166604 |
| Tfdp2   | -0,14 | 0,840909921 | -0,71 | 0,282349086 | 0,5   | 0,337509636 | -0,14 | 0,85846312  | -0,37 | 0,640223591 |
| Tfe3    | -0,49 | 0,260634235 | -0,03 | 0,966705367 | 0,22  | 0,627536778 | -0,1  | 0,887559686 | -0,11 | 0,903153151 |
| Tfeb    | 0,17  | 0,845137004 | -0,05 | 0,934654121 | 0,12  | 0,938322304 | -1,06 | 0,155839442 | -0,39 | 0,720742956 |
| Tfec    | -0,03 | 0,990894139 | 1,31  | 0,127301007 | -0,21 | 0,798891687 | 1,6   | 0,009334604 | 0,82  | 0,154331583 |
| Tff1    | -0,12 | 0,790694396 | -0,09 | 0,889334606 | 0,12  | 0,841563482 | 0     | 1           | 0,02  | 0,987935971 |
| Tff2    | -0,24 | 0,707502054 | -0,19 | 0,824372931 | 0,2   | 0,791504463 | 0,08  | 0,827764222 | 0,03  | 0,978981442 |
| Tff3    | 0,23  | 0,694699901 | 0,28  | 0,856287448 | -0,33 | 0,503319245 | -0,12 | 0,768817161 | 0,07  | 0,928764431 |
| Tfg     | 0,02  | 0,979910955 | -0,24 | 0,664787536 | 0,3   | 0,675674731 | 0,9   | 0,041216174 | -0,06 | 0,949178165 |
| Tfip11  | -0,63 | 0,222236104 | -0,47 | 0,26375548  | 0,52  | 0,348577918 | 0,05  | 0,932315462 | -0,29 | 0,613970786 |
| Tfpi    | -0,44 | 0,422775151 | -0,71 | 0,350369095 | 0,28  | 0,809137779 | 1,64  | 0,058298656 | -0,17 | 0,864373858 |
| Tfpi2   | -0,61 | 0,24508813  | -0,47 | 0,565881295 | 1,55  | 0,112229182 | 1,55  | 0,058680593 | -0,02 | 0,991291007 |
| Tfpt    | 0,07  | 0,908281692 | 0,49  | 0,364268354 | -0,37 | 0,668331131 | 0,02  | 0,989096818 | 0,17  | 0,880656145 |
| Tfr2    | -0,09 | 0,877849931 | -0,1  | 0,927205716 | -0,03 | 0,971087234 | 0,06  | 0,958172386 | -0,23 | 0,753724249 |
| Tfrc    | -0,44 | 0,772692695 | -0,71 | 0,593423633 | 1,09  | 0,197403139 | 0,92  | 0,31632105  | 1,17  | 0,142592596 |

|          |       |             |       |             |       |             |       |             |       |             |
|----------|-------|-------------|-------|-------------|-------|-------------|-------|-------------|-------|-------------|
| Tg       | -0,09 | 0,883413827 | 0,2   | 0,854044527 | -0,1  | 0,894239558 | -0,02 | 0,969930486 | -0,07 | 0,929962198 |
| Tgds     | -0,32 | 0,648730873 | 0,28  | 0,832460257 | 0,28  | 0,757306958 | 0,46  | 0,699388639 | 0,16  | 0,923951087 |
| Tgfa     | 0,2   | 0,664456582 | 0,2   | 0,747728608 | -0,15 | 0,804607903 | -0,74 | 0,283428056 | 0,22  | 0,821727352 |
| Tgfb1    | -0,28 | 0,522076759 | -0,24 | 0,664787536 | 0,53  | 0,324321658 | 0,43  | 0,225317501 | -0,23 | 0,674843991 |
| Tgfb1i1  | -0,5  | 0,54401985  | 0     | 1           | 0,02  | 0,990836784 | 0,17  | 0,702534189 | -0,43 | 0,454357813 |
| Tgfb2    | -0,82 | 0,214430522 | -0,62 | 0,409234346 | 0,84  | 0,061794597 | -1,38 | 0,040207275 | -0,18 | 0,827032122 |
| Tgfb3    | 0,38  | 0,741767645 | 1,33  | 0,302028989 | 0,72  | 0,545465016 | -2,64 | 0,007014797 | -1,39 | 0,034868271 |
| Tgfbj    | -0,23 | 0,777255073 | 0,49  | 0,484006822 | 0,75  | 0,287010185 | 1,85  | 0,023007946 | -0,29 | 0,723861142 |
| Tgibr1   | 0,43  | 0,474293292 | 0,16  | 0,82894645  | -0,14 | 0,904644989 | 0,38  | 0,513116548 | -0,35 | 0,635612479 |
| Tgibr2   | -1,12 | 0,076108673 | -0,64 | 0,153524445 | 0,61  | 0,389841181 | -0,2  | 0,786750698 | -0,03 | 0,980945466 |
| Tgibr3   | -1,76 | 0,032275277 | -0,75 | 0,475079924 | 0,39  | 0,570298389 | -1,69 | 0,031868323 | -0,93 | 0,048387054 |
| Tgibr3l  | 1     | 0,17958326  | -0,42 | 0,73623784  | 0,41  | 0,621644149 | 0,38  | 0,510508734 | -0,99 | 0,128761584 |
| Tgibrap1 | -0,04 | 0,950532575 | 0,11  | 0,847885195 | 0,16  | 0,823823322 | -0,61 | 0,246971456 | -0,56 | 0,330314966 |
| Tgif1    | 0,32  | 0,567556465 | 0,04  | 0,956145324 | 0,07  | 0,919868008 | 1,74  | 0,053873365 | 0,06  | 0,968348427 |
| Tgif2    | -0,55 | 0,469049834 | -0,02 | 0,994486533 | -0,38 | 0,61483831  | -0,14 | 0,860410443 | 0,19  | 0,887367245 |
| Tgif2lx1 | -0,03 | 0,959458865 | -0,02 | 0,980518468 | 0,06  | 0,948637233 | 0,01  | 0,986768223 | 0,04  | 0,96484552  |
| Tgm1     | 0,33  | 0,598635457 | 0,25  | 0,807100558 | 1,02  | 0,063243606 | 0,1   | 0,911916626 | 0,42  | 0,583434544 |
| Tgm2     | 1,16  | 0,096471105 | 0,66  | 0,138101221 | -0,99 | 0,031028475 | -0,27 | 0,461824013 | 0,56  | 0,219224272 |
| Tgm3     | 0,05  | 0,958188047 | -0,14 | 0,882847123 | -0,01 | 0,993379272 | -0,08 | 0,851926687 | -0,26 | 0,704271976 |
| Tgm4     | 0,26  | 0,81630789  | -0,49 | 0,339235652 | -0,2  | 0,791504463 | 0,03  | 0,949606416 | -0,1  | 0,917347603 |
| Tgm5     | -0,17 | 0,78476082  | 0,03  | 0,965147491 | -0,12 | 0,834979811 | 0,01  | 0,988205241 | 0,04  | 0,972590168 |
| Tgm6     | 0,18  | 0,836838966 | -0,32 | 0,72665096  | -0,11 | 0,888377256 | 0,27  | 0,684056965 | 0,07  | 0,933064949 |
| Tgm7     | -0,85 | 0,318041432 | -0,19 | 0,764289173 | -0,53 | 0,706714392 | 0,16  | 0,781581766 | 0,43  | 0,424301504 |
| Tgoln1   | 0,33  | 0,521512105 | 0,22  | 0,687308213 | -0,04 | 0,959981309 | -0,01 | 0,985756322 | 0,19  | 0,761683333 |
| Tgs1     | 0,69  | 0,149740371 | 0,46  | 0,31069547  | -0,38 | 0,433353965 | -0,13 | 0,779796922 | 0,41  | 0,540089233 |
| Th       | -0,08 | 0,931964207 | -0,14 | 0,861828582 | -0,12 | 0,876412565 | 0,17  | 0,849767588 | 0,27  | 0,741902552 |
| Tha1     | 0,03  | 0,970078059 | 0,34  | 0,652758123 | -0,14 | 0,887769873 | -0,4  | 0,305080132 | 0,07  | 0,951429597 |
| Thada    | 0,05  | 0,959661454 | -0,49 | 0,565714809 | -0,14 | 0,877366773 | 0,05  | 0,967866794 | -0,05 | 0,971543996 |
| Thap1    | 0,13  | 0,861605323 | 0,15  | 0,828219939 | -0,14 | 0,882993082 | 0,1   | 0,920158794 | -0,14 | 0,883791272 |
| Thap11   | -0,43 | 0,663119768 | -0,14 | 0,837035571 | 0,53  | 0,472387041 | -0,26 | 0,834063294 | 0,01  | 0,994774512 |
| Thap2    | -0,12 | 0,883012121 | -0,38 | 0,4427505   | 0,57  | 0,735003288 | 0,37  | 0,490835105 | 0,01  | 0,9939542   |
| Thap3    | -0,09 | 0,864526424 | 0,24  | 0,589100557 | -0,25 | 0,702911636 | -0,11 | 0,795911056 | 0,17  | 0,799596237 |
| Thap4    | -0,2  | 0,823402057 | -0,01 | 0,996259587 | 0,55  | 0,280958182 | 0,4   | 0,550320623 | -0,08 | 0,938039082 |
| Thap6    | 0,77  | 0,36624708  | -0,23 | 0,829923566 | -0,2  | 0,800142198 | -0,59 | 0,141376967 | -0,62 | 0,279515946 |
| Thap7    | -0,23 | 0,633889248 | -0,23 | 0,857732355 | 0,44  | 0,34034009  | -0,11 | 0,86107717  | -0,3  | 0,647267682 |

|         |       |             |       |             |       |             |       |             |       |             |
|---------|-------|-------------|-------|-------------|-------|-------------|-------|-------------|-------|-------------|
| Thap8   | 0,22  | 0,694699901 | 0,09  | 0,891749049 | -0,15 | 0,83442082  | 0,14  | 0,862828669 | 0,44  | 0,50404638  |
| Thbd    | -1,1  | 0,05916852  | -1    | 0,100303734 | 0,25  | 0,733288021 | -2,48 | 0,004678667 | -0,66 | 0,251199318 |
| Thbs1   | 0,82  | 0,202687828 | 0,88  | 0,124059409 | -0,74 | 0,103030088 | 3,36  | 0,006007017 | -1,46 | 0,054271655 |
| Thbs2   | -0,35 | 0,803557792 | -0,03 | 0,989873399 | 0,24  | 0,864598204 | -4,41 | 0,003009221 | -0,36 | 0,633381473 |
| Thbs3   | 0,06  | 0,932354771 | -0,11 | 0,932918674 | 0,24  | 0,771729329 | 0,09  | 0,943864463 | 0,17  | 0,876899052 |
| Thbs4   | -0,18 | 0,808882471 | -0,2  | 0,788987411 | 0,93  | 0,380830666 | 0,22  | 0,619611108 | 0,18  | 0,799340413 |
| Theg    | -0,26 | 0,713874683 | -0,02 | 0,978904487 | -0,2  | 0,786933951 | 0,29  | 0,619134782 | 0,11  | 0,904931004 |
| Thegl   | 0,32  | 0,683531628 | -0,32 | 0,790350061 | -0,15 | 0,898382247 | 0,25  | 0,702311689 | -0,01 | 0,993413582 |
| Them4   | -0,49 | 0,610101544 | -0,58 | 0,493391321 | 0,34  | 0,712697139 | -0,07 | 0,943143586 | 0,75  | 0,083660756 |
| Them5   | -0,4  | 0,317205194 | -0,29 | 0,781344808 | -0,48 | 0,219362501 | -0,16 | 0,795911056 | -0,26 | 0,739555073 |
| Them6   | -0,49 | 0,58295432  | -0,32 | 0,68442935  | -0,31 | 0,86462271  | -0,74 | 0,193238554 | 0,58  | 0,271576025 |
| Them7   | 0,09  | 0,917948654 | 0,17  | 0,887493001 | 0,15  | 0,866424417 | 0,12  | 0,760649176 | 0,23  | 0,787221268 |
| Themis  | -0,37 | 0,52916082  | 0,29  | 0,831695248 | -0,07 | 0,929871006 | 0,12  | 0,866054559 | 0,23  | 0,745134899 |
| Themis2 | 1,04  | 0,173675956 | 1,49  | 0,080782813 | -0,36 | 0,816883729 | 1,38  | 0,102207067 | 1,42  | 0,122984965 |
| Themis3 | 0,14  | 0,816710776 | 0,1   | 0,896381982 | 0,08  | 0,921090652 | -0,07 | 0,853963723 | -0,39 | 0,471850346 |
| Thg1l   | 0,37  | 0,486330326 | -0,01 | 0,992175086 | 0,43  | 0,616978696 | 0,33  | 0,556481849 | -0,05 | 0,964146618 |
| Thnsl1  | 0,06  | 0,950532575 | 0     | 1           | -0,05 | 0,963199274 | -0,25 | 0,697336477 | 0,14  | 0,881968395 |
| Thnsl2  | -1,08 | 0,198046102 | 0,35  | 0,826265098 | -0,33 | 0,543696688 | -0,87 | 0,161251943 | -0,88 | 0,307250018 |
| Thoc1   | -0,26 | 0,735596307 | -0,49 | 0,700297886 | 0,01  | 0,996265665 | 0,47  | 0,508545999 | 0,61  | 0,424301504 |
| Thoc2   | 0,1   | 0,843101965 | 0,46  | 0,457281647 | 0,16  | 0,823823322 | -0,33 | 0,535627157 | 0,15  | 0,840952901 |
| Thoc3   | -0,3  | 0,460231397 | -0,33 | 0,696983491 | 0,8   | 0,185792544 | 0,58  | 0,301516971 | -0,14 | 0,852080109 |
| Thoc5   | -0,69 | 0,279256257 | -0,09 | 0,927205716 | 0,17  | 0,79407734  | 0,14  | 0,735358224 | -0,38 | 0,562212408 |
| Thoc6   | 0,05  | 0,972112267 | 0,36  | 0,804576975 | -0,56 | 0,513446928 | 0,01  | 0,996714438 | 0,04  | 0,96918257  |
| Thoc7   | -0,14 | 0,771381752 | -0,4  | 0,405702807 | 0,2   | 0,738241106 | 0,63  | 0,192516739 | -0,02 | 0,985448733 |
| Thop1   | -1,02 | 0,089531229 | -0,75 | 0,420485441 | 0,68  | 0,180205458 | 1,6   | 0,062738721 | -0,65 | 0,400500806 |
| Thpo    | 0,37  | 0,397054492 | -0,05 | 0,965147491 | -0,18 | 0,831266864 | -0,19 | 0,740792457 | 0,16  | 0,847312006 |
| Thra    | -0,24 | 0,59108421  | 0,08  | 0,910595744 | 0,43  | 0,708335441 | -1,06 | 0,033468792 | -0,09 | 0,899196564 |
| Thrap3  | -0,47 | 0,2369587   | -0,04 | 0,957968757 | 0,14  | 0,868590766 | -0,05 | 0,902657593 | 0,18  | 0,741456572 |
| Thrb    | 0,31  | 0,593908972 | 0,26  | 0,602956592 | -0,22 | 0,685838081 | -1,37 | 0,128383032 | -0,74 | 0,551972106 |
| Thrsp   | -0,07 | 0,922118639 | 0,52  | 0,830000589 | -0,52 | 0,688788757 | -4,91 | 0,004331967 | -0,79 | 0,237132147 |
| Thsd1   | -0,61 | 0,180862229 | -0,53 | 0,264702741 | 0,1   | 0,914134206 | 0,63  | 0,256722381 | -0,62 | 0,347477356 |
| Thsd4   | 0,35  | 0,54401985  | 0,6   | 0,477855502 | -0,18 | 0,810825081 | -2,23 | 0,020759346 | 0,22  | 0,765327693 |
| Thsd7a  | 0,08  | 0,915927879 | 0,15  | 0,690272092 | 0,36  | 0,676418104 | -1,25 | 0,012290044 | -0,36 | 0,525387388 |
| Thsd7b  | 0,11  | 0,86554415  | -0,09 | 0,948409105 | -0,15 | 0,792393268 | 0,02  | 0,96569569  | -0,14 | 0,861056054 |
| Thtpa   | -0,53 | 0,464107803 | 0,41  | 0,510558453 | 0,19  | 0,81745518  | -1,34 | 0,018041423 | -0,65 | 0,166595171 |

|          |       |             |       |             |       |             |       |             |       |             |
|----------|-------|-------------|-------|-------------|-------|-------------|-------|-------------|-------|-------------|
| Thumpd1  | -0,5  | 0,524085673 | 0,41  | 0,429168189 | 0,72  | 0,374722202 | -0,07 | 0,958927    | -0,32 | 0,795326093 |
| Thumpd2  | -0,36 | 0,754029145 | 0,3   | 0,891930795 | 0,2   | 0,906678445 | -0,24 | 0,838310589 | -0,05 | 0,970815167 |
| Thumpd3  | -0,34 | 0,612107783 | 0,03  | 0,987162042 | 0,12  | 0,95106142  | 0,39  | 0,818693228 | 0,56  | 0,761155953 |
| Thy1     | -0,58 | 0,316309977 | 0,19  | 0,681316719 | -0,36 | 0,729031049 | -0,18 | 0,793099857 | -0,06 | 0,96738578  |
| Thyn1    | -0,43 | 0,385512506 | -0,3  | 0,533180438 | 0,29  | 0,670631235 | 0,67  | 0,09552555  | 0,18  | 0,758052028 |
| Tia1     | -0,3  | 0,70137787  | -0,03 | 0,981586987 | -0,1  | 0,890473147 | 0,59  | 0,437507788 | 0,08  | 0,953971867 |
| Tiaf2    | 0,08  | 0,90742841  | 0,09  | 0,855187815 | 0,16  | 0,757498725 | -0,1  | 0,854342596 | -0,25 | 0,712793529 |
| Tial1    | 0,08  | 0,886889675 | -0,09 | 0,880362561 | -0,03 | 0,974887915 | 0,46  | 0,195886404 | 0,24  | 0,695702232 |
| Tiam1    | -0,12 | 0,877498793 | 0,2   | 0,74717977  | 0,33  | 0,613380041 | -1,06 | 0,04742959  | -0,4  | 0,486708315 |
| Tiam2    | -0,36 | 0,79498488  | 0,16  | 0,904671921 | 1,46  | 0,017935088 | -0,69 | 0,508104523 | 0,62  | 0,642685227 |
| Ticam1   | -0,31 | 0,495265339 | 0,18  | 0,761473181 | 0,3   | 0,501664412 | 0,58  | 0,116579425 | 0,13  | 0,912417636 |
| Ticam2   | 0,06  | 0,957427783 | 0,26  | 0,794404033 | -0,1  | 0,896467636 | -0,71 | 0,224277308 | -0,46 | 0,51509981  |
| Ticrr    | -1,58 | 0,023509566 | -1,28 | 0,208373622 | 1,43  | 0,174917581 | 1,94  | 0,033417496 | -0,12 | 0,907798813 |
| Tie1     | -0,36 | 0,325818963 | -0,07 | 0,928172808 | 0,34  | 0,511236157 | -0,34 | 0,3977091   | -0,49 | 0,305995061 |
| Tifa     | 0,37  | 0,677288845 | 0,68  | 0,671319666 | -0,49 | 0,309159791 | 0,45  | 0,707902199 | 1,05  | 0,087632866 |
| Tifab    | -0,05 | 0,942948768 | -0,12 | 0,926353869 | -0,14 | 0,813217657 | 0,91  | 0,036769299 | 0,2   | 0,768884521 |
| Tigar    | 0,26  | 0,69456255  | 0,2   | 0,667757755 | 0,26  | 0,705754446 | -0,18 | 0,75555626  | -0,56 | 0,275574262 |
| Tigd2    | 0,08  | 0,911404262 | 0,49  | 0,525626411 | -0,1  | 0,925417014 | 0,12  | 0,912872267 | 0,65  | 0,397952448 |
| Tigd3    | 0,23  | 0,586458491 | 0,45  | 0,524704569 | -0,12 | 0,824279952 | -0,82 | 0,376631277 | -1,04 | 0,271713687 |
| Tigd4    | 0,04  | 0,9664135   | -0,05 | 0,958247858 | -0,04 | 0,963221639 | 0,05  | 0,909922299 | 0,02  | 0,983768072 |
| Tigd5    | 0,09  | 0,879432304 | 0     | 0,998237793 | -0,35 | 0,589451508 | 0,01  | 0,991962381 | -0,16 | 0,823098095 |
| Tigit    | 0,13  | 0,874688734 | 0,01  | 0,994351904 | -0,09 | 0,904239687 | -0,08 | 0,940891309 | -0,14 | 0,937558003 |
| Timd2    | -0,19 | 0,77131302  | 0,25  | 0,741181313 | 0,09  | 0,92422034  | 0,26  | 0,473118872 | 0,39  | 0,5118664   |
| Timd4    | -0,23 | 0,71740567  | -0,34 | 0,538642201 | -0,37 | 0,570233796 | -0,09 | 0,8556361   | -0,1  | 0,91314596  |
| Timeless | 0,18  | 0,772855197 | 0,82  | 0,275147283 | 0     | 0,998779926 | -0,01 | 0,988205241 | 0,43  | 0,462558109 |
| Timm10   | -0,19 | 0,754029145 | -0,02 | 0,971708855 | 0,29  | 0,57717258  | 0,6   | 0,153265608 | 0,19  | 0,804576732 |
| Timm10b  | -0,09 | 0,881663401 | -0,01 | 0,998237793 | 0,05  | 0,948712735 | 0,64  | 0,077269482 | 0,17  | 0,796146369 |
| Timm13   | -0,09 | 0,838892004 | -0,19 | 0,691433995 | 0,36  | 0,482439444 | 0,45  | 0,163529439 | -0,1  | 0,887446756 |
| Timm17a  | -0,05 | 0,933509565 | -0,04 | 0,956555856 | 0,19  | 0,762549825 | 0,53  | 0,141794466 | 0,07  | 0,939127163 |
| Timm17b  | -0,11 | 0,839203781 | -0,33 | 0,526101975 | 1,21  | 0,208537585 | -0,12 | 0,777673386 | -0,32 | 0,570939418 |
| Timm21   | 0,26  | 0,734646609 | -0,22 | 0,821170447 | 0,5   | 0,620837479 | 0,39  | 0,502210241 | 0     | 0,998444219 |
| Timm22   | -0,37 | 0,427486466 | -0,7  | 0,394656972 | 0,11  | 0,911634383 | 0,74  | 0,337580631 | -0,06 | 0,970154126 |
| Timm23   | -0,28 | 0,496008309 | -0,18 | 0,669338008 | 0,45  | 0,498349888 | 0,78  | 0,045711543 | 0,2   | 0,765809384 |
| Timm44   | -0,5  | 0,257178091 | -0,16 | 0,831404974 | 0,17  | 0,809137779 | 0,27  | 0,603471344 | -0,07 | 0,927536545 |
| Timm50   | 0,06  | 0,935767468 | -0,61 | 0,223537    | 0,73  | 0,382532767 | 0,57  | 0,240061976 | -0,39 | 0,535557609 |



|         |       |             |       |             |       |             |       |             |       |             |
|---------|-------|-------------|-------|-------------|-------|-------------|-------|-------------|-------|-------------|
| Timm8a2 | 0,16  | 0,802806556 | 0,15  | 0,831685312 | 0,02  | 0,982179569 | 0,14  | 0,831289571 | 0,33  | 0,6425144   |
| Timm8b  | -0,18 | 0,714127381 | -0,22 | 0,666285906 | 0,49  | 0,343526576 | 0,59  | 0,238752213 | 0,02  | 0,988084587 |
| Timm9   | -1,2  | 0,229301605 | -0,82 | 0,31241009  | 0,72  | 0,383161457 | 0,92  | 0,202960417 | -0,2  | 0,894623317 |
| Timmdc1 | -0,05 | 0,955394263 | -0,02 | 0,981441793 | 0,16  | 0,887118162 | 0,46  | 0,507269846 | 0,24  | 0,801385411 |
| Timp1   | 0,22  | 0,680520303 | -0,57 | 0,401208626 | 1,27  | 0,133082189 | 2,57  | 0,032112461 | 0,15  | 0,931519966 |
| Timp2   | -0,88 | 0,220541198 | -0,79 | 0,628604582 | 0,44  | 0,688311192 | -2,2  | 0,013556826 | -0,95 | 0,311906172 |
| Timp3   | 1,21  | 0,261006087 | 0,86  | 0,183377483 | -1,56 | 0,001901807 | -1,13 | 0,034590782 | 0,1   | 0,875520848 |
| Timp4   | -0,08 | 0,953269094 | 0,26  | 0,790939978 | -1,45 | 0,299010171 | -2,71 | 0,131465838 | -2,84 | 0,053864142 |
| Tinag   | -0,32 | 0,477363665 | -0,22 | 0,842663656 | -0,41 | 0,43706094  | -0,09 | 0,921036173 | 0,62  | 0,679932345 |
| Tinagl1 | 0,28  | 0,504621759 | -0,53 | 0,450538273 | -0,32 | 0,761861872 | -1,96 | 0,008746145 | 0,17  | 0,77360786  |
| Tinf2   | -0,3  | 0,677867423 | 0,02  | 0,981236932 | -0,29 | 0,700684795 | -0,11 | 0,89865617  | 0,43  | 0,587576064 |
| Tip3    | 0     | 0,996998625 | -0,09 | 0,884434898 | -0,17 | 0,751632401 | 0,03  | 0,940972589 | 0,14  | 0,861506431 |
| Tiparp  | 0,26  | 0,658350988 | 0,58  | 0,274378139 | 0,09  | 0,941254389 | -0,63 | 0,16909689  | 0,15  | 0,840515079 |
| Tipin   | -1,11 | 0,123851261 | -1,2  | 0,154145842 | 1,27  | 0,280799775 | 0,73  | 0,131321325 | -0,03 | 0,982949444 |
| Tiprl   | 0,14  | 0,852363306 | 0,08  | 0,965147491 | -0,32 | 0,748973263 | 0,47  | 0,561612258 | 0,59  | 0,50483975  |
| Tirap   | -0,44 | 0,654324758 | 0,73  | 0,405702807 | 0,01  | 0,993379272 | 0,47  | 0,563779179 | 0,54  | 0,606264887 |
| Tjap1   | 0,8   | 0,400980668 | -0,16 | 0,89081665  | 0,56  | 0,323828391 | -0,32 | 0,827259542 | -0,45 | 0,752187547 |
| Tjp1    | -0,37 | 0,462062718 | -0,15 | 0,755393855 | 0,63  | 0,242316795 | 0,11  | 0,770598451 | -0,26 | 0,633360146 |
| Tjp2    | 0,48  | 0,456353173 | 0,14  | 0,883631611 | 0,43  | 0,416331324 | 0,76  | 0,137301874 | -0,32 | 0,628274636 |
| Tjp3    | -0,2  | 0,701297763 | -0,15 | 0,765937045 | 0,86  | 0,077115477 | 0,05  | 0,958927    | 0,01  | 0,991628025 |
| Tk1     | -0,33 | 0,472739337 | -0,96 | 0,124059409 | 1,25  | 0,179552168 | 1,17  | 0,037972964 | 0,25  | 0,732679577 |
| Tk2     | -0,23 | 0,832947001 | -0,29 | 0,840881774 | -0,29 | 0,877598693 | -1,57 | 0,121231601 | -0,19 | 0,881079068 |
| Tkfc    | -0,47 | 0,586458491 | 0,04  | 0,974890527 | 0,07  | 0,963199274 | 0,08  | 0,923775458 | -0,73 | 0,455836363 |
| Tkt     | -0,75 | 0,087125838 | -0,32 | 0,694725971 | 0,61  | 0,264885341 | 0,82  | 0,075379341 | -0,49 | 0,321326363 |
| Tktl1   | -0,07 | 0,931976704 | -0,29 | 0,561562373 | -0,54 | 0,385794091 | -0,06 | 0,925025576 | -0,17 | 0,835191    |
| Tktl2   | 0,01  | 0,991027737 | -0,1  | 0,827237618 | 0,4   | 0,37112141  | 0,17  | 0,662587743 | 0,18  | 0,85945887  |
| Tlcd1   | -0,41 | 0,681707424 | -0,29 | 0,695823136 | 0,77  | 0,180243962 | -0,05 | 0,981957534 | -0,26 | 0,911780802 |
| Tlcd2   | 1,23  | 0,074890017 | 0,44  | 0,587008183 | -0,42 | 0,658520591 | -0,02 | 0,993337409 | 0,26  | 0,881729238 |
| Tldc1   | -0,1  | 0,925449982 | 0,21  | 0,775823848 | -0,3  | 0,715386906 | -0,57 | 0,558718825 | -0,63 | 0,468672987 |
| Tldc2   | 0,4   | 0,468284568 | -0,03 | 0,970832543 | 0,22  | 0,765947831 | 0,02  | 0,983462169 | 0,22  | 0,84701421  |
| Tle1    | -0,03 | 0,964442449 | 1,15  | 0,070776028 | -0,54 | 0,379638471 | -1,37 | 0,029017177 | 0,27  | 0,68987325  |
| Tle2    | -0,27 | 0,604147886 | -0,34 | 0,44265541  | 0,47  | 0,432229079 | -0,6  | 0,156217103 | -0,59 | 0,2909847   |
| Tle3    | 0,02  | 0,976253759 | 0,09  | 0,894205636 | 0,15  | 0,809096485 | 0,21  | 0,523093635 | -0,21 | 0,725387944 |
| Tle4    | 0,69  | 0,162020271 | 1,15  | 0,094366643 | -0,95 | 0,066172795 | -0,8  | 0,05476074  | 0,62  | 0,195499187 |
| Tle6    | -0,38 | 0,489042022 | 0,3   | 0,561842393 | -0,07 | 0,960677449 | -0,15 | 0,697357121 | -0,11 | 0,884640084 |

|         |       |             |       |             |       |             |       |             |       |             |
|---------|-------|-------------|-------|-------------|-------|-------------|-------|-------------|-------|-------------|
| Tlk1    | 0,08  | 0,893143496 | 0,12  | 0,820134803 | 0,08  | 0,947117869 | -0,21 | 0,651514848 | -0,13 | 0,862102182 |
| Tlk2    | 0,05  | 0,953175228 | 0,42  | 0,670902144 | 0,23  | 0,834488055 | -0,08 | 0,931428395 | -0,06 | 0,951236192 |
| Tll1    | -0,83 | 0,534017117 | -0,63 | 0,268436493 | 1,45  | 0,004621866 | 0,47  | 0,629628837 | -0,56 | 0,578675445 |
| Tll2    | 0,09  | 0,897747251 | -0,12 | 0,88632917  | 0,1   | 0,906908822 | 0,44  | 0,5144446   | 0,02  | 0,984675109 |
| Tln1    | -0,49 | 0,208576708 | -0,24 | 0,558135871 | 0,56  | 0,194619745 | 0,24  | 0,512935647 | -0,33 | 0,575004207 |
| Tln2    | -0,47 | 0,424529546 | 0,08  | 0,930192503 | 0,66  | 0,102250397 | -1,4  | 0,02296991  | -0,35 | 0,631201077 |
| Tlr1    | 0,3   | 0,641870046 | 0,24  | 0,852461907 | 0,47  | 0,532815251 | 0,16  | 0,81439444  | 0,38  | 0,710368081 |
| Tlr11   | 0,37  | 0,476494431 | 0,02  | 0,980518468 | 0     | 0,996260936 | 0,07  | 0,93808802  | 0,06  | 0,955247021 |
| Tlr12   | -0,13 | 0,781976975 | 0,16  | 0,85154774  | -0,22 | 0,800561863 | 0,05  | 0,947940753 | 0,31  | 0,639071244 |
| Tlr13   | -0,46 | 0,772079485 | 0,44  | 0,738199172 | 0,73  | 0,657622487 | -0,17 | 0,84956075  | -0,83 | 0,267077511 |
| Tlr2    | 0,52  | 0,600952042 | 1,2   | 0,107449087 | 0,08  | 0,941627748 | -0,77 | 0,267147508 | 0,51  | 0,539230722 |
| Tlr3    | -0,19 | 0,745514605 | -0,03 | 0,97693208  | -0,38 | 0,568205473 | -0,37 | 0,260503826 | 0,21  | 0,715928244 |
| Tlr4    | 0,07  | 0,892823025 | -0,08 | 0,916496897 | -0,09 | 0,922971065 | -0,21 | 0,695429247 | 0,7   | 0,176186731 |
| Tlr5    | 0,16  | 0,775750172 | -0,4  | 0,571014364 | -0,1  | 0,907812602 | 0,38  | 0,378102359 | 0,07  | 0,949544475 |
| Tlr6    | -0,21 | 0,846853842 | -0,51 | 0,593236789 | -0,23 | 0,775747201 | 1,64  | 0,159021607 | 0,76  | 0,481762055 |
| Tlr7    | 0     | 0,998584113 | 0,38  | 0,400515868 | -0,3  | 0,8128837   | -0,41 | 0,622435789 | -0,15 | 0,899093911 |
| Tlr8    | 0,16  | 0,782369077 | -0,12 | 0,907271658 | 0,24  | 0,809137779 | 0,06  | 0,944800115 | 0,03  | 0,981640628 |
| Tlr9    | -0,22 | 0,655695308 | -0,11 | 0,812432185 | -0,61 | 0,274403371 | 0,57  | 0,153884707 | 0,54  | 0,49920065  |
| Tlx1    | -0,6  | 0,154393404 | -0,48 | 0,502876002 | -0,49 | 0,378741497 | 0,79  | 0,151903589 | 0,46  | 0,433201574 |
| Tlx2    | 0,26  | 0,716668029 | -0,2  | 0,732044571 | -0,26 | 0,712299253 | 0,06  | 0,891790388 | -0,05 | 0,960065122 |
| Tlx3    | -0,14 | 0,854484314 | -0,26 | 0,727238755 | -0,5  | 0,212922359 | 0,05  | 0,919835104 | -0,16 | 0,816296231 |
| Tm2d1   | 0,22  | 0,643938495 | 0,06  | 0,930192503 | 0,01  | 0,995401448 | -0,35 | 0,616062976 | 0,4   | 0,591101999 |
| Tm2d2   | 0,11  | 0,846773585 | 0,09  | 0,934468159 | -0,16 | 0,829762084 | 0,09  | 0,915710817 | -0,42 | 0,486708315 |
| Tm2d3   | -0,1  | 0,84377795  | -0,09 | 0,853162838 | -0,02 | 0,980423952 | -0,32 | 0,39058196  | -0,18 | 0,798598035 |
| Tm4sf1  | -0,27 | 0,565453765 | 0,28  | 0,666450149 | -0,17 | 0,859411859 | -0,68 | 0,092238747 | 0,1   | 0,898326354 |
| Tm4sf19 | -0,25 | 0,78476082  | -0,54 | 0,406817158 | 0,01  | 0,993071391 | 0,44  | 0,378525142 | -0,09 | 0,915067495 |
| Tm4sf20 | 0,19  | 0,799145501 | 0,12  | 0,841665238 | 0,16  | 0,782805427 | 0,19  | 0,628027498 | 0,27  | 0,616797608 |
| Tm4sf4  | -0,07 | 0,96528686  | -0,23 | 0,78280538  | 0,23  | 0,864590981 | 0,07  | 0,947809027 | 0,39  | 0,759535713 |
| Tm4sf5  | -0,17 | 0,707197684 | -0,09 | 0,884434898 | 0,22  | 0,70635953  | 0,28  | 0,495340036 | 0,01  | 0,994270272 |
| Tm6sf1  | -0,11 | 0,902628825 | -0,2  | 0,732847182 | 0,22  | 0,895520077 | -1,39 | 0,01904208  | 0,32  | 0,591108247 |
| Tm6sf2  | 0,27  | 0,560965941 | 0,06  | 0,923044405 | -0,05 | 0,955257293 | -0,81 | 0,207930072 | -0,31 | 0,545351562 |
| Tm7sf2  | 0,22  | 0,619165619 | -0,01 | 0,995205602 | 0,12  | 0,894229514 | -0,29 | 0,619134782 | -0,27 | 0,735052158 |
| Tm7sf3  | -0,4  | 0,342848678 | -0,21 | 0,812664394 | 0,28  | 0,516254562 | -1,07 | 0,079938142 | -0,96 | 0,096180357 |
| Tm9sf1  | -0,68 | 0,38528369  | -0,46 | 0,563746321 | 0,94  | 0,28504607  | 0,5   | 0,190838433 | -0,14 | 0,860919132 |
| Tm9sf2  | -0,16 | 0,775122619 | -0,03 | 0,958856577 | 0,04  | 0,969262382 | -0,84 | 0,066910258 | -0,36 | 0,490573302 |

|        |       |             |       |             |       |             |       |             |       |             |
|--------|-------|-------------|-------|-------------|-------|-------------|-------|-------------|-------|-------------|
| Tm9sf3 | -0,46 | 0,333403216 | -0,27 | 0,511371517 | 0,14  | 0,848089506 | 0,93  | 0,181153291 | 0,06  | 0,961406182 |
| Tm9sf4 | -0,1  | 0,884230844 | -0,19 | 0,764672565 | -0,18 | 0,716561895 | 0,56  | 0,433275732 | -0,12 | 0,91339829  |
| Tma16  | -0,49 | 0,732191837 | -0,14 | 0,849913233 | -0,44 | 0,743104512 | 0,92  | 0,36116404  | -0,35 | 0,87934258  |
| Tma7   | -0,29 | 0,469671947 | -0,42 | 0,434114626 | 0,32  | 0,602775092 | 0,98  | 0,125095638 | -0,15 | 0,879310059 |
| Tmbim1 | -0,51 | 0,430723846 | -0,44 | 0,565914475 | -0,04 | 0,969821374 | -0,58 | 0,081195751 | 0,05  | 0,952190189 |
| Tmbim4 | 0,81  | 0,26415811  | 0,65  | 0,200413483 | -1,08 | 0,036818657 | -0,14 | 0,77390173  | 0,49  | 0,367774608 |
| Tmbim6 | 0,23  | 0,562802786 | 0,35  | 0,470112519 | -0,34 | 0,497205965 | -0,31 | 0,382025024 | 0,35  | 0,46348763  |
| Tmbim7 | 0,15  | 0,825308689 | 0,16  | 0,867265251 | -0,01 | 0,993379272 | 0,36  | 0,433497759 | 0,52  | 0,32976535  |
| Tmc1   | -0,17 | 0,788623069 | -0,07 | 0,9554581   | 0,01  | 0,991240121 | 0,03  | 0,979535553 | -0,13 | 0,861819841 |
| Tmc2   | 0     | 0,996219097 | 0,22  | 0,649542145 | -0,21 | 0,783157601 | 0,03  | 0,957427513 | -0,02 | 0,981030324 |
| Tmc3   | 0,65  | 0,473832525 | 0,36  | 0,571014364 | 0,37  | 0,530591164 | 1,02  | 0,422943572 | 0,03  | 0,987948597 |
| Tmc4   | 0,43  | 0,389268664 | 0,22  | 0,709743701 | 0,58  | 0,309053396 | -0,52 | 0,324591518 | -0,11 | 0,935812103 |
| Tmc5   | -0,39 | 0,719381055 | -0,13 | 0,864288349 | -0,52 | 0,37970041  | -1,03 | 0,039454495 | -0,31 | 0,647175712 |
| Tmc6   | -0,09 | 0,886813669 | -0,04 | 0,965413567 | 0,06  | 0,95204022  | -0,29 | 0,444455078 | -0,54 | 0,278096307 |
| Tmc7   | -0,53 | 0,285063072 | -0,13 | 0,833407873 | 0,48  | 0,313065218 | -1,67 | 0,079167035 | -0,66 | 0,575447526 |
| Tmc8   | -0,43 | 0,493923359 | -0,52 | 0,425361939 | 0,28  | 0,68845998  | 0,26  | 0,618453093 | -0,45 | 0,563077271 |
| Tmcc1  | -0,32 | 0,465168175 | -0,37 | 0,693906911 | 0,61  | 0,330521283 | -0,25 | 0,610149813 | 0,07  | 0,949751787 |
| Tmcc2  | -0,13 | 0,838220858 | 0,56  | 0,373160177 | -0,73 | 0,219678148 | -0,94 | 0,308619545 | -0,08 | 0,961780852 |
| Tmcc3  | 0,62  | 0,523564775 | 0,39  | 0,646170664 | -0,25 | 0,703971104 | -0,35 | 0,56514466  | -0,45 | 0,537362127 |
| Tmco1  | -0,13 | 0,876019664 | -0,22 | 0,855632384 | -0,08 | 0,973690509 | -0,37 | 0,679886975 | 0,05  | 0,962820357 |
| Tmco2  | 0,49  | 0,565453765 | 0,01  | 1           | -0,45 | 0,391889599 | 0,31  | 0,745480006 | 0,4   | 0,416896732 |
| Tmco3  | 0,09  | 0,897213933 | 0,29  | 0,672416139 | -0,1  | 0,909963525 | 0,39  | 0,771362714 | 0,37  | 0,792404969 |
| Tmco4  | 0,52  | 0,217539055 | 0,64  | 0,304034247 | -0,15 | 0,876684089 | 0,14  | 0,742693508 | 0,86  | 0,163177787 |
| Tmco5  | -0,27 | 0,61807202  | -0,32 | 0,668667058 | -0,16 | 0,811424918 | 0,35  | 0,601890448 | 0,3   | 0,690741737 |
| Tmco5b | 0,2   | 0,75201912  | 0,43  | 0,436251163 | -0,18 | 0,715098904 | -0,02 | 0,979212436 | -0,1  | 0,902226626 |
| Tmco6  | -0,04 | 0,963036332 | 0,17  | 0,829201522 | -0,1  | 0,909717677 | -0,31 | 0,826341157 | -0,22 | 0,904636459 |
| Tmed1  | -0,12 | 0,895031891 | 0,25  | 0,761161909 | 0,21  | 0,870377336 | -0,08 | 0,911258809 | 0     | 0,996197742 |
| Tmed10 | 0,18  | 0,672226505 | -0,03 | 0,960071209 | 0,08  | 0,909963525 | -0,06 | 0,878569859 | 0,08  | 0,906366254 |
| Tmed11 | 0,08  | 0,883923631 | -0,07 | 0,919762719 | -0,15 | 0,832650971 | -0,17 | 0,683901621 | 0,01  | 0,990425708 |
| Tmed3  | 0,31  | 0,654363277 | 0,19  | 0,692189927 | -0,21 | 0,783052291 | 0,86  | 0,065063652 | -0,01 | 0,994265717 |
| Tmed4  | -0,23 | 0,729638783 | 0,27  | 0,599495018 | -0,28 | 0,620837479 | -0,71 | 0,125210827 | -0,26 | 0,698795718 |
| Tmed5  | 0,07  | 0,952474817 | -0,61 | 0,416417474 | -0,26 | 0,797422121 | -0,14 | 0,831487274 | 0,12  | 0,948759136 |
| Tmed6  | 0,22  | 0,701086418 | -0,01 | 0,993789602 | -0,1  | 0,904918185 | 0     | 1           | -0,1  | 0,8803747   |
| Tmed7  | -0,06 | 0,922118639 | 0,02  | 0,97636546  | 0,06  | 0,940131381 | -0,32 | 0,522230981 | -0,18 | 0,797293554 |
| Tmed8  | -1,06 | 0,189644465 | 0,07  | 0,94248518  | -0,41 | 0,451201263 | 0,1   | 0,894986166 | 0,31  | 0,624854325 |

|          |       |             |       |             |       |             |       |             |       |             |
|----------|-------|-------------|-------|-------------|-------|-------------|-------|-------------|-------|-------------|
| Tmed9    | -0,36 | 0,321798414 | -0,09 | 0,847473714 | 0,35  | 0,546286708 | 1,26  | 0,024477499 | 0,09  | 0,922012322 |
| Tmeff1   | 0,02  | 0,988559058 | 0,37  | 0,642775877 | 0     | 0,997581017 | 0     | 1           | 0,15  | 0,893064058 |
| Tmeff2   | 0,17  | 0,797266879 | 0,12  | 0,881113709 | -0,03 | 0,976092199 | -0,56 | 0,252551774 | -0,28 | 0,724154403 |
| Tmem100  | -0,76 | 0,260634235 | 0,15  | 0,946710245 | 0,5   | 0,566099777 | -0,89 | 0,172194249 | 0     | 0,999775166 |
| Tmem101  | -0,3  | 0,545543835 | -0,34 | 0,483643581 | 0,06  | 0,956570063 | 0,43  | 0,442280315 | -0,19 | 0,839493334 |
| Tmem102  | -0,18 | 0,70436391  | 0,43  | 0,487582623 | -0,16 | 0,890473147 | -0,84 | 0,14425577  | -0,22 | 0,7446186   |
| Tmem104  | -0,39 | 0,55640978  | -0,36 | 0,61193546  | -0,09 | 0,958851839 | -0,34 | 0,389981292 | -0,69 | 0,177268295 |
| Tmem106a | 0,46  | 0,476494431 | 0,31  | 0,561842393 | -0,15 | 0,923350407 | 0,81  | 0,134636808 | 0,88  | 0,107059332 |
| Tmem106b | -0,2  | 0,71129252  | 0,3   | 0,646170664 | 0,66  | 0,413129036 | -0,02 | 0,988205241 | 0,17  | 0,871038748 |
| Tmem106c | 0,07  | 0,897455401 | 0,34  | 0,747707816 | -0,6  | 0,368620918 | 0,6   | 0,450283107 | -0,69 | 0,576337996 |
| Tmem107  | -0,01 | 0,997285684 | -0,18 | 0,914952205 | 0,46  | 0,684455958 | -0,38 | 0,636945912 | -0,8  | 0,37287699  |
| Tmem108  | 0,19  | 0,832696131 | 0,43  | 0,695689103 | -0,21 | 0,850171327 | -1,03 | 0,232657638 | -0,08 | 0,947901649 |
| Tmem109  | -0,27 | 0,69801847  | -0,48 | 0,231499374 | 0,02  | 0,991255289 | -0,36 | 0,296322125 | -0,17 | 0,815693459 |
| Tmem11   | -0,11 | 0,877312739 | 0,18  | 0,783677427 | 0,41  | 0,375308286 | 0,05  | 0,908141892 | -0,08 | 0,912890826 |
| Tmem110  | -0,33 | 0,470166881 | -0,14 | 0,82263744  | 0,47  | 0,37970041  | -0,28 | 0,668850659 | -0,69 | 0,281633932 |
| Tmem114  | 0,16  | 0,810879711 | 0,25  | 0,693906911 | -0,01 | 0,993686224 | -0,11 | 0,876439802 | 0,18  | 0,851637639 |
| Tmem115  | -0,68 | 0,287459734 | -0,13 | 0,783677427 | 0,33  | 0,634604099 | 0,33  | 0,327902734 | -0,24 | 0,825564898 |
| Tmem116  | -0,37 | 0,601227779 | -0,15 | 0,9152526   | -0,06 | 0,950198596 | -0,01 | 0,99361557  | 0,07  | 0,955499131 |
| Tmem117  | -0,23 | 0,569100385 | 0,08  | 0,967338233 | 0,09  | 0,921956183 | 0     | 1           | 0,17  | 0,904836805 |
| Tmem119  | 0,01  | 0,995171458 | 0,11  | 0,839113337 | -0,46 | 0,31827973  | -0,81 | 0,201707164 | -0,65 | 0,342250812 |
| Tmem120a | -0,2  | 0,761212734 | 0,06  | 0,935041212 | 0,1   | 0,927986051 | -0,76 | 0,055241509 | 0,13  | 0,854067571 |
| Tmem120b | -0,04 | 0,950532575 | -0,25 | 0,793603525 | 1,02  | 0,197507065 | 1,62  | 0,053068175 | 0,26  | 0,796993902 |
| Tmem121  | -0,16 | 0,799493751 | -0,2  | 0,613780894 | 0,25  | 0,693655482 | 0,45  | 0,291551173 | -0,09 | 0,920355527 |
| Tmem123  | -0,13 | 0,764824121 | 0,1   | 0,838730743 | -0,34 | 0,666386083 | 0,05  | 0,926317009 | -0,09 | 0,91314596  |
| Tmem125  | 0,01  | 0,991919022 | 0,67  | 0,565639972 | 0,23  | 0,83603209  | -0,16 | 0,879339892 | -0,2  | 0,858526809 |
| Tmem126a | -0,17 | 0,779331628 | 0,09  | 0,893013712 | 0,47  | 0,66424919  | 0,31  | 0,560311751 | 0,52  | 0,566132912 |
| Tmem126b | 0,27  | 0,618100277 | -0,59 | 0,583200444 | -0,4  | 0,695705149 | -0,21 | 0,80555403  | -0,67 | 0,292058998 |
| Tmem127  | -0,45 | 0,214430522 | -0,06 | 0,90781211  | 0,08  | 0,9127937   | 0,33  | 0,470236257 | 0,09  | 0,928563569 |
| Tmem128  | 0,23  | 0,496123406 | 0,57  | 0,26375548  | -0,18 | 0,771789829 | 0,57  | 0,247548798 | 0,59  | 0,297385654 |
| Tmem129  | -0,05 | 0,964143575 | -0,11 | 0,823530278 | 0,32  | 0,751758339 | 0,04  | 0,974813898 | 0,29  | 0,760657649 |
| Tmem130  | -0,02 | 0,973698017 | 0,06  | 0,962242653 | 0,03  | 0,976042637 | -0,06 | 0,959958662 | -0,11 | 0,940438527 |
| Tmem131  | -0,06 | 0,903817676 | 0,02  | 0,969314504 | 0,29  | 0,64473731  | 0,53  | 0,281211901 | 0,11  | 0,90011553  |
| Tmem132a | -0,87 | 0,26418498  | -0,36 | 0,411058455 | 0,71  | 0,379231825 | 0,13  | 0,829561532 | -0,31 | 0,721429859 |
| Tmem132b | 0,27  | 0,663447662 | -0,43 | 0,664787536 | 0,07  | 0,939097402 | 0,51  | 0,497404577 | 0,43  | 0,625087577 |
| Tmem132c | -0,12 | 0,856803959 | -0,45 | 0,494666675 | 0,02  | 0,984778342 | 0,3   | 0,414522125 | 0,07  | 0,92741476  |

|            |       |             |       |             |       |             |       |             |       |             |
|------------|-------|-------------|-------|-------------|-------|-------------|-------|-------------|-------|-------------|
| Tmem132cos | -0,3  | 0,69801847  | -0,04 | 0,981758111 | 0,08  | 0,938291859 | 0,16  | 0,664161531 | 0,13  | 0,922322426 |
| Tmem132d   | -0,2  | 0,820023436 | 0     | 1           | -0,24 | 0,757498725 | -0,24 | 0,64059095  | 0     | 0,996733137 |
| Tmem132e   | 0,12  | 0,895870455 | 0,09  | 0,90781211  | -0,16 | 0,837003818 | 0,07  | 0,92755654  | -0,38 | 0,602231893 |
| Tmem134    | -0,02 | 0,971922167 | 0     | 1           | -0,13 | 0,823823322 | 0,42  | 0,441459023 | -0,2  | 0,844455252 |
| Tmem135    | -1,14 | 0,403765204 | 0,03  | 0,980518468 | -0,25 | 0,796418663 | 0,07  | 0,953998829 | -0,08 | 0,952190189 |
| Tmem136    | -0,42 | 0,474293292 | -0,27 | 0,656204868 | 0,35  | 0,512312279 | -0,75 | 0,348938015 | 0,02  | 0,985831064 |
| Tmem138    | -0,38 | 0,312439966 | -0,38 | 0,690219028 | 1,42  | 0,215654416 | 0,55  | 0,213931075 | 0,02  | 0,98847659  |
| Tmem139    | -0,02 | 0,988674093 | 0,28  | 0,748874675 | 0,17  | 0,857466061 | 0,17  | 0,800488711 | 0,13  | 0,906338603 |
| Tmem140    | 1,31  | 0,087125838 | 0,78  | 0,112811585 | -1,74 | 0,001356557 | -0,56 | 0,09620225  | 0,81  | 0,064977434 |
| Tmem141    | 0,82  | 0,111767257 | -0,25 | 0,781665479 | 0,76  | 0,246495472 | -0,38 | 0,663950892 | 0,09  | 0,940438527 |
| Tmem143    | -0,79 | 0,188870392 | 0,24  | 0,693906911 | 0,58  | 0,691107919 | -0,01 | 0,997245643 | -0,26 | 0,810572057 |
| Tmem144    | -0,36 | 0,617452158 | -0,35 | 0,435489861 | 0,34  | 0,811424918 | 0,31  | 0,700603284 | 0,33  | 0,745134899 |
| Tmem145    | 0,1   | 0,858731997 | -0,27 | 0,586770731 | 0,01  | 0,995985283 | 0,2   | 0,630159899 | 0,1   | 0,899196564 |
| Tmem147    | -0,06 | 0,912278501 | -0,46 | 0,250849989 | 0,54  | 0,437087993 | 0,21  | 0,587199948 | -0,28 | 0,808466523 |
| Tmem147os  | 0,29  | 0,79074505  | -0,4  | 0,70101997  | -0,47 | 0,734124133 | -1,07 | 0,132889006 | -0,41 | 0,677838252 |
| Tmem14a    | -0,51 | 0,464971517 | 0,19  | 0,697354745 | 0,27  | 0,637321546 | -0,6  | 0,164251214 | -0,26 | 0,730289864 |
| Tmem14c    | -0,58 | 0,254442524 | -0,15 | 0,815416975 | 0,71  | 0,402220741 | 0,49  | 0,412845847 | 0,07  | 0,955908741 |
| Tmem150a   | -0,19 | 0,796452078 | 0,07  | 0,940156926 | -0,23 | 0,807521381 | -0,77 | 0,048145525 | 0,4   | 0,407527353 |
| Tmem150b   | -0,19 | 0,746700079 | -0,22 | 0,842793123 | 0,01  | 0,997581017 | -0,08 | 0,922515487 | -0,02 | 0,979392852 |
| Tmem150c   | 0,54  | 0,470397003 | 1,93  | 0,087315688 | 0,07  | 0,969921262 | -0,64 | 0,475952768 | -0,11 | 0,95985938  |
| Tmem150cos | 0,23  | 0,707480624 | 0,03  | 0,978904487 | 0,06  | 0,947117869 | 0,24  | 0,47719968  | 0,01  | 0,990610351 |
| Tmem151a   | -0,4  | 0,554473314 | 0,28  | 0,818597532 | 0,12  | 0,863503599 | 0,1   | 0,80795564  | 0,33  | 0,74933755  |
| Tmem151b   | -0,06 | 0,962254712 | 0,15  | 0,842663656 | 0,53  | 0,490661923 | 0,02  | 0,980359749 | 0,08  | 0,931519966 |
| Tmem154    | -0,9  | 0,176868604 | -0,42 | 0,38334636  | 0,34  | 0,750874251 | 0,42  | 0,377681746 | 0,38  | 0,619416028 |
| Tmem156    | 0,29  | 0,77886874  | 0,21  | 0,825120426 | 0,05  | 0,955217689 | -0,21 | 0,850452008 | 0,37  | 0,694233384 |
| Tmem158    | -0,23 | 0,617280733 | -0,07 | 0,89474305  | 0,1   | 0,909963525 | 0,16  | 0,80174822  | 0,14  | 0,862853865 |
| Tmem159    | 0,18  | 0,757032046 | 0,5   | 0,409204827 | -0,48 | 0,451455806 | 0,17  | 0,861959213 | -0,01 | 0,993293923 |
| Tmem160    | -0,55 | 0,268112899 | -0,17 | 0,723353163 | 0,71  | 0,591420507 | 0,09  | 0,953420981 | 0,42  | 0,807816401 |
| Tmem161a   | -0,13 | 0,878562194 | 0,12  | 0,932292974 | 0,13  | 0,911860447 | 0,1   | 0,926704232 | 0,06  | 0,96625835  |
| Tmem161b   | 0,13  | 0,892823025 | 0,58  | 0,418712141 | 0,9   | 0,185085354 | -1,34 | 0,090387764 | 0,12  | 0,921063662 |
| Tmem163    | 0     | 0,996998625 | -0,53 | 0,467800898 | 0,42  | 0,680127367 | 0,67  | 0,299356529 | 0,68  | 0,467443662 |
| Tmem164    | -0,5  | 0,472993837 | 0,11  | 0,900476061 | 0,36  | 0,721369858 | 0,24  | 0,626827567 | 0,05  | 0,976743304 |
| Tmem165    | -0,54 | 0,217096023 | -0,07 | 0,921610565 | 1     | 0,057325847 | 0,36  | 0,36769451  | -0,12 | 0,872242794 |
| Tmem167    | -0,07 | 0,976870178 | -0,56 | 0,851707756 | 0,14  | 0,937802036 | 0,81  | 0,18825829  | 0,67  | 0,575543402 |
| Tmem167b   | -0,16 | 0,72711401  | -0,11 | 0,866244292 | -0,08 | 0,901410016 | -0,33 | 0,287471018 | -0,28 | 0,608004947 |

|             |       |             |       |             |       |             |       |             |       |             |
|-------------|-------|-------------|-------|-------------|-------|-------------|-------|-------------|-------|-------------|
| Tmem168     | 0,26  | 0,771827188 | 0,18  | 0,803870841 | -0,02 | 0,995218662 | -0,1  | 0,940891309 | 0,39  | 0,735192953 |
| Tmem169     | -0,06 | 0,932546706 | -0,33 | 0,722727486 | -0,01 | 0,995414392 | 0,08  | 0,835175707 | -0,61 | 0,348829447 |
| Tmem17      | -0,33 | 0,633989663 | -0,31 | 0,754054706 | 0,33  | 0,574032919 | -0,21 | 0,701167068 | -0,86 | 0,062036292 |
| Tmem170     | 0     | 0,999700495 | -0,18 | 0,820806352 | 0,15  | 0,914134206 | 0,53  | 0,434837088 | 0,57  | 0,409091862 |
| Tmem170b    | 0,31  | 0,734646609 | 0,54  | 0,430154065 | -0,05 | 0,973309739 | -0,19 | 0,781581766 | 0,37  | 0,698795718 |
| Tmem171     | 0,06  | 0,96177183  | -0,04 | 0,981356392 | 1,41  | 0,375948654 | 0,2   | 0,858632076 | 0,4   | 0,654872635 |
| Tmem173     | 0,45  | 0,281648139 | 0,27  | 0,49125334  | -0,06 | 0,950846671 | 1,94  | 0,009073953 | 1,28  | 0,018862549 |
| Tmem174     | 0,1   | 0,87909897  | 0,13  | 0,783858612 | -0,29 | 0,649960017 | -0,08 | 0,865206138 | 0,36  | 0,718869886 |
| Tmem175     | -0,2  | 0,813604928 | 0,22  | 0,612287919 | 0,12  | 0,921956183 | -0,73 | 0,167912675 | -0,66 | 0,390882671 |
| Tmem176a    | 0,13  | 0,815556659 | -0,09 | 0,903682621 | -0,21 | 0,805598605 | -0,95 | 0,096085093 | -0,51 | 0,418752801 |
| Tmem176b    | 0,42  | 0,256385653 | 0,26  | 0,608726006 | -0,14 | 0,851041834 | -0,75 | 0,18458304  | -0,22 | 0,796501308 |
| Tmem177     | -0,22 | 0,866900494 | -0,5  | 0,790939978 | 0,13  | 0,889687519 | -0,24 | 0,830299574 | -0,51 | 0,699060093 |
| Tmem178     | -0,06 | 0,962442672 | 0,66  | 0,708168221 | 0,05  | 0,978207511 | -1,79 | 0,123976493 | 0,02  | 0,990264435 |
| Tmem178b    | 0,24  | 0,800851935 | 0,1   | 0,880892852 | -0,27 | 0,68916793  | 0,19  | 0,77372709  | 0,02  | 0,982816728 |
| Tmem179     | -0,2  | 0,657006162 | -0,03 | 0,976423495 | 0,03  | 0,981207238 | 0,41  | 0,363922515 | -0,11 | 0,868660245 |
| Tmem179b    | 0,21  | 0,664456582 | 0,1   | 0,864363741 | -0,2  | 0,859578966 | -0,39 | 0,253124162 | 0,07  | 0,929780699 |
| Tmem18      | -0,54 | 0,256112056 | -0,17 | 0,78280538  | 0,64  | 0,419537272 | -0,09 | 0,794368434 | -0,04 | 0,974553568 |
| Tmem180     | -0,69 | 0,22556036  | -0,33 | 0,643102783 | 0,29  | 0,720389578 | 0,3   | 0,601573005 | -0,54 | 0,383190821 |
| Tmem181a    | -0,02 | 0,984956742 | 0,17  | 0,832194263 | -0,13 | 0,906501943 | 0,29  | 0,685226398 | 0,3   | 0,728388857 |
| Tmem181b-ps | -0,1  | 0,941388557 | -0,22 | 0,594415097 | -0,35 | 0,865148119 | -0,12 | 0,916072825 | -0,54 | 0,55254983  |
| Tmem182     | -0,13 | 0,870052902 | -0,14 | 0,940156926 | -0,76 | 0,340237423 | -2,71 | 0,029878973 | -2,45 | 0,01706209  |
| Tmem183a    | -0,04 | 0,946368282 | -0,14 | 0,756584634 | 0,45  | 0,457506381 | 0,63  | 0,144044949 | 0,12  | 0,876418697 |
| Tmem184a    | 0,1   | 0,88956316  | 0,22  | 0,674902403 | 0,11  | 0,91344763  | -0,11 | 0,838095051 | 0,37  | 0,728483022 |
| Tmem184b    | -0,3  | 0,447271895 | -0,3  | 0,501438027 | 0,28  | 0,659555232 | -0,26 | 0,447310044 | -0,24 | 0,640213665 |
| Tmem184c    | -1,37 | 0,074890017 | -0,07 | 0,90164068  | 0,09  | 0,967093319 | -0,25 | 0,682922205 | -0,17 | 0,883370317 |
| Tmem185b    | 0,1   | 0,84900712  | 0,15  | 0,685177845 | -0,07 | 0,941063967 | -0,07 | 0,85301747  | 0     | 0,9969305   |
| Tmem186     | -0,97 | 0,15548842  | -0,27 | 0,77148563  | 0,26  | 0,733423502 | -0,38 | 0,672571582 | -0,09 | 0,957346469 |
| Tmem189     | -0,44 | 0,652607099 | 0,29  | 0,587008183 | 0,45  | 0,363310189 | 1,11  | 0,060250087 | -0,03 | 0,982813638 |
| Tmem19      | -0,07 | 0,892195063 | -0,2  | 0,591305258 | 0,41  | 0,660610212 | 0,56  | 0,331697813 | 0,18  | 0,874554354 |
| Tmem190     | -0,33 | 0,583246144 | 0,01  | 0,997700959 | 0,1   | 0,905209657 | 0,11  | 0,817976855 | 0,14  | 0,885872093 |
| Tmem191c    | 0,28  | 0,597519827 | -0,01 | 0,993068441 | 0,19  | 0,701414584 | -0,24 | 0,621929361 | -0,16 | 0,859663155 |
| Tmem192     | 0,67  | 0,242651292 | 0,39  | 0,532983509 | 0,01  | 0,997816755 | -0,75 | 0,175621807 | -0,53 | 0,443763251 |
| Tmem194     | 0,37  | 0,755234272 | -0,39 | 0,674832256 | 0,83  | 0,692509177 | 1,16  | 0,109211967 | 0,03  | 0,980961333 |
| Tmem194b    | -0,34 | 0,738169244 | -0,19 | 0,934602811 | 0,13  | 0,926237505 | -0,68 | 0,207736059 | -0,48 | 0,378814275 |
| Tmem196     | -0,07 | 0,965116762 | -0,09 | 0,912137323 | -0,06 | 0,953951069 | -0,19 | 0,769821993 | -0,3  | 0,68987325  |

|          |       |             |       |             |       |             |       |             |       |             |
|----------|-------|-------------|-------|-------------|-------|-------------|-------|-------------|-------|-------------|
| Tmem198  | -0,13 | 0,791021845 | -0,06 | 0,95245564  | 0,02  | 0,990836784 | -0,1  | 0,813737813 | -0,12 | 0,876927228 |
| Tmem198b | -0,24 | 0,54180732  | -0,24 | 0,765180904 | -0,05 | 0,94940954  | 0,83  | 0,166727095 | -0,84 | 0,171064668 |
| Tmem199  | 0,03  | 0,967655963 | 0,2   | 0,711613217 | 0,25  | 0,782401983 | 0,44  | 0,39058196  | 0,52  | 0,487108558 |
| Tmem2    | 0,36  | 0,337173147 | 0,32  | 0,408153854 | 0,01  | 0,997220401 | 0,35  | 0,539796706 | -0,12 | 0,914492686 |
| Tmem200a | 0,17  | 0,720783705 | -0,08 | 0,888152531 | -0,33 | 0,440450916 | -0,68 | 0,074954507 | -0,43 | 0,549951038 |
| Tmem200b | 0     | 0,997205466 | 0,1   | 0,873140586 | -0,13 | 0,841464759 | -0,75 | 0,295360318 | -0,27 | 0,776907684 |
| Tmem200c | -0,05 | 0,929634271 | 0,12  | 0,819802664 | 0,06  | 0,927950027 | 0,06  | 0,897599603 | 0,12  | 0,890957032 |
| Tmem201  | -0,11 | 0,815332681 | -0,35 | 0,559630539 | -0,24 | 0,704809914 | -0,14 | 0,878232273 | -0,23 | 0,836061657 |
| Tmem202  | 0,49  | 0,430173798 | 0,25  | 0,842663656 | 0,09  | 0,955742302 | -0,28 | 0,595510906 | 0,23  | 0,788761628 |
| Tmem203  | -0,04 | 0,948926586 | -0,19 | 0,862293956 | 0,66  | 0,377624172 | 0,27  | 0,730951567 | -0,37 | 0,684349871 |
| Tmem204  | -0,41 | 0,362667708 | -0,19 | 0,671319666 | -0,08 | 0,911634383 | -1,09 | 0,077995751 | -0,42 | 0,590396118 |
| Tmem205  | 0,07  | 0,9231839   | 0,19  | 0,857388191 | -0,2  | 0,764668807 | -1,02 | 0,046133382 | -0,56 | 0,217859301 |
| Tmem206  | -0,02 | 0,983184832 | -0,07 | 0,955885753 | 0,58  | 0,404982221 | 0,22  | 0,778817721 | -0,45 | 0,545166604 |
| Tmem207  | -0,18 | 0,844688163 | 0,22  | 0,826862641 | 0,28  | 0,632676478 | 0,23  | 0,665890635 | 1,19  | 0,325920244 |
| Tmem208  | -0,06 | 0,950669622 | -0,19 | 0,710041414 | 0,07  | 0,927950027 | 0,26  | 0,529366123 | -0,03 | 0,97425848  |
| Tmem209  | -0,98 | 0,189866491 | 0,16  | 0,821227978 | 1,35  | 0,034677498 | -1,1  | 0,147745831 | 0,02  | 0,989016067 |
| Tmem210  | 0,22  | 0,760660571 | -0,01 | 0,993789602 | 0,16  | 0,850475685 | 0,08  | 0,919263182 | 0,01  | 0,987680175 |
| Tmem211  | 0,08  | 0,879514284 | 0,01  | 0,993789602 | 0,04  | 0,949912807 | 0,22  | 0,6696427   | 0,22  | 0,757428993 |
| Tmem212  | -0,54 | 0,580610288 | -0,48 | 0,38334636  | 0,22  | 0,810305776 | 1,02  | 0,145909546 | -0,12 | 0,915067495 |
| Tmem213  | 0,28  | 0,588801063 | 0     | 1           | -0,15 | 0,862480223 | -0,19 | 0,673131686 | -0,34 | 0,615874754 |
| Tmem214  | -0,5  | 0,232916935 | -0,31 | 0,435366158 | 0,64  | 0,138915123 | 1,1   | 0,107038056 | 0,21  | 0,826207788 |
| Tmem215  | -0,38 | 0,294535935 | -0,07 | 0,938044149 | -0,06 | 0,932986275 | 0,15  | 0,813804322 | -0,06 | 0,953297732 |
| Tmem216  | 0,01  | 0,991919022 | -0,34 | 0,73274163  | 0,68  | 0,61190379  | -0,29 | 0,662848818 | -0,48 | 0,535065209 |
| Tmem217  | 0,5   | 0,357036798 | 0,09  | 0,873881223 | -0,26 | 0,620837479 | 0,05  | 0,922740736 | 0,11  | 0,912594881 |
| Tmem218  | 0,06  | 0,956518553 | 0,06  | 0,961440613 | 0,15  | 0,872313115 | -0,3  | 0,71158821  | -0,28 | 0,747612008 |
| Tmem219  | 0,59  | 0,446039618 | 0,59  | 0,322806958 | 0,08  | 0,963018377 | -1,05 | 0,125239737 | 0,46  | 0,537593983 |
| Tmem220  | -0,67 | 0,270670946 | -0,44 | 0,494161701 | 0,63  | 0,501664412 | -0,53 | 0,575297022 | -0,16 | 0,920355527 |
| Tmem221  | 0,02  | 0,981412917 | 0,06  | 0,922703368 | -0,01 | 0,993379272 | 0,14  | 0,858956727 | -0,05 | 0,969117862 |
| Tmem222  | -0,11 | 0,917014629 | 0,06  | 0,945143056 | 0,36  | 0,493193538 | 0,1   | 0,94167689  | 0,21  | 0,884047752 |
| Tmem223  | -0,08 | 0,90742841  | -0,23 | 0,778678095 | 0,11  | 0,906501943 | 0,11  | 0,85301747  | 0,16  | 0,836094333 |
| Tmem225  | 0,08  | 0,89081819  | -0,36 | 0,563471886 | -0,07 | 0,922318683 | 0,19  | 0,58265052  | 0,14  | 0,858526809 |
| Tmem229a | -0,01 | 0,992296615 | 0,32  | 0,602956592 | 0     | 0,997145286 | -0,06 | 0,937079845 | 0,4   | 0,629683647 |
| Tmem229b | -0,16 | 0,831529237 | 0,18  | 0,882847123 | -0,12 | 0,953622038 | 0,6   | 0,383028572 | -0,1  | 0,904371266 |
| Tmem230  | 0,54  | 0,737887307 | 0,34  | 0,701043773 | -0,45 | 0,666575428 | -0,38 | 0,74524486  | 0,34  | 0,753273319 |
| Tmem231  | -0,2  | 0,818611891 | -0,05 | 0,953419196 | -0,23 | 0,816710945 | -0,06 | 0,968343227 | -0,03 | 0,986971861 |

|          |       |             |       |             |       |             |       |             |       |             |
|----------|-------|-------------|-------|-------------|-------|-------------|-------|-------------|-------|-------------|
| Tmem232  | 0,15  | 0,80309313  | -0,13 | 0,831404974 | -0,22 | 0,734124133 | 0,29  | 0,635869722 | -0,14 | 0,885872093 |
| Tmem233  | -0,16 | 0,753450161 | 0,23  | 0,666450149 | 0,03  | 0,97548193  | -0,15 | 0,858877782 | -0,06 | 0,948163009 |
| Tmem234  | 0,07  | 0,919989774 | 0,24  | 0,693906911 | 0,03  | 0,978255748 | -0,39 | 0,414522125 | -0,21 | 0,772619545 |
| Tmem235  | 0,03  | 0,950897622 | 0,31  | 0,667502888 | -0,08 | 0,953074345 | 0,03  | 0,973927614 | 0,34  | 0,650806881 |
| Tmem236  | -0,3  | 0,782542883 | 0     | 1           | 0,08  | 0,926566777 | 0,65  | 0,062125207 | 1,25  | 0,436708262 |
| Tmem237  | 0,07  | 0,912307086 | -0,01 | 0,9860901   | 0,02  | 0,991568687 | -0,04 | 0,920036779 | 0,01  | 0,993413582 |
| Tmem238  | -0,62 | 0,354119544 | -0,59 | 0,481105963 | 1,34  | 0,124912754 | -1,15 | 0,040406123 | -0,9  | 0,131482799 |
| Tmem239  | -0,26 | 0,597519827 | -0,19 | 0,720667099 | -0,14 | 0,872313115 | 0,24  | 0,418017948 | 0,34  | 0,624426919 |
| Tmem240  | -0,42 | 0,606922012 | -0,02 | 0,992929085 | -0,13 | 0,915388136 | -0,25 | 0,747440364 | 0,21  | 0,872429951 |
| Tmem241  | -0,39 | 0,740395303 | 0,08  | 0,958187617 | 0,52  | 0,469558664 | -0,7  | 0,330407596 | -0,66 | 0,474007701 |
| Tmem242  | -0,26 | 0,634025092 | -0,04 | 0,980771647 | 0,18  | 0,877127326 | 0,59  | 0,207752764 | -0,24 | 0,776025316 |
| Tmem243  | 0,83  | 0,153824107 | 0,62  | 0,200336704 | -0,73 | 0,209534486 | 0,01  | 0,98482897  | 0,72  | 0,196710506 |
| Tmem245  | -0,37 | 0,711274014 | -0,47 | 0,697811585 | 0,57  | 0,694535546 | -0,32 | 0,420894607 | -0,66 | 0,263026379 |
| Tmem246  | -0,31 | 0,595441823 | -0,13 | 0,885599656 | -0,08 | 0,932770159 | -0,58 | 0,304528829 | 0,04  | 0,979152939 |
| Tmem247  | -0,03 | 0,965991176 | 0,14  | 0,840564791 | -0,13 | 0,844191447 | 0,28  | 0,498372058 | -0,22 | 0,735606891 |
| Tmem248  | 0,2   | 0,715493304 | -0,16 | 0,764299173 | 0,05  | 0,967093319 | 0,81  | 0,078600315 | 0,17  | 0,826679825 |
| Tmem25   | -0,29 | 0,526856715 | -0,18 | 0,838730743 | 0,02  | 0,987356432 | 0,1   | 0,910859165 | -0,29 | 0,796586414 |
| Tmem251  | 0,45  | 0,392545323 | 0,36  | 0,361602374 | -0,09 | 0,902549288 | 0,2   | 0,601868312 | 0,26  | 0,722833796 |
| Tmem252  | 0,51  | 0,354424228 | 0,06  | 0,916042399 | -0,12 | 0,881380091 | 0,78  | 0,067623231 | 0,28  | 0,667292357 |
| Tmem253  | -0,03 | 0,976574175 | -0,52 | 0,459231649 | -0,23 | 0,795445046 | 0,07  | 0,946347378 | -0,41 | 0,639451374 |
| Tmem254a | -1,33 | 0,273887426 | -1,4  | 0,480808447 | 1,26  | 0,30134516  | 1,98  | 0,109978861 | 0,28  | 0,888182112 |
| Tmem255a | -0,79 | 0,214264122 | 0,13  | 0,810146573 | 2,04  | 0,069329557 | 6,01  | 0,003009221 | 0,25  | 0,85041485  |
| Tmem255b | -0,94 | 0,187868882 | 0,58  | 0,178589032 | 0,17  | 0,83818796  | -1,33 | 0,055569548 | -0,79 | 0,32029895  |
| Tmem256  | 0,11  | 0,841541699 | -0,18 | 0,732847182 | 0,07  | 0,961453721 | 0,74  | 0,083968806 | 0,07  | 0,935812103 |
| Tmem258  | -0,13 | 0,803879137 | -0,22 | 0,639603025 | 0,66  | 0,260408634 | 0,9   | 0,036676931 | -0,24 | 0,673577848 |
| Tmem259  | -0,02 | 0,973083901 | -0,02 | 0,981563536 | 0,04  | 0,969570532 | -0,44 | 0,402720968 | -0,27 | 0,701852402 |
| Tmem26   | 0,09  | 0,948926586 | -1,84 | 0,087435995 | 0,25  | 0,759399009 | -3,4  | 0,006048812 | -0,89 | 0,211018037 |
| Tmem260  | 0,04  | 0,972288114 | -0,13 | 0,916496897 | -0,14 | 0,882540073 | -0,37 | 0,550221299 | -0,13 | 0,874699689 |
| Tmem261  | -0,17 | 0,703606438 | 0     | 1           | -0,1  | 0,914134206 | 0,76  | 0,069208004 | 0,15  | 0,856336277 |
| Tmem263  | -0,32 | 0,420080103 | 0,02  | 0,986782918 | 0,24  | 0,594211231 | 1,33  | 0,023776029 | 0,28  | 0,684349871 |
| Tmem266  | -0,12 | 0,871728626 | -0,15 | 0,836404534 | -0,21 | 0,767822182 | 0,19  | 0,735958592 | -0,2  | 0,891991231 |
| Tmem27   | 0,22  | 0,729638783 | 0,03  | 0,993398521 | -0,22 | 0,750624323 | -3,53 | 0,004331967 | 0,53  | 0,720844381 |
| Tmem28   | 0,03  | 0,986191362 | 0,32  | 0,639167098 | -0,04 | 0,972332753 | -0,13 | 0,820360895 | -0,24 | 0,640213665 |
| Tmem29   | 0,33  | 0,557855331 | 0,01  | 0,994486533 | 0,5   | 0,454034987 | 0,8   | 0,474175236 | 0,94  | 0,455256406 |
| Tmem30a  | 0,28  | 0,421029929 | 0,24  | 0,648353961 | -0,18 | 0,820243663 | -0,47 | 0,297352003 | 0,64  | 0,198575493 |



|           |       |             |       |             |       |             |       |             |       |             |
|-----------|-------|-------------|-------|-------------|-------|-------------|-------|-------------|-------|-------------|
| Tmem30b   | 0,19  | 0,680776928 | 0,23  | 0,702741995 | 0,04  | 0,955257293 | -0,52 | 0,182595927 | -0,36 | 0,46348763  |
| Tmem30c   | -0,21 | 0,69656531  | 0,09  | 0,864363741 | 0,06  | 0,950720533 | 0,23  | 0,667849424 | 0,56  | 0,439038071 |
| Tmem33    | 0,19  | 0,882539359 | 1,02  | 0,112811585 | -0,41 | 0,456595062 | -0,51 | 0,346558785 | 1,23  | 0,04525359  |
| Tmem35    | 0,07  | 0,910211895 | -0,21 | 0,643743213 | -0,05 | 0,955303601 | 0,31  | 0,599550126 | 0,18  | 0,804991332 |
| Tmem37    | -0,02 | 0,99210236  | -0,5  | 0,509013394 | 0,58  | 0,37721644  | 0,02  | 0,981203009 | 0,55  | 0,499989818 |
| Tmem38a   | -0,2  | 0,882943798 | 1     | 0,693345761 | 0,17  | 0,8785896   | -1,36 | 0,248377606 | -0,46 | 0,611234576 |
| Tmem38b   | -0,3  | 0,792313188 | -0,01 | 0,997619997 | 0,66  | 0,599202081 | -1,99 | 0,086890299 | -0,5  | 0,753328965 |
| Tmem39a   | -0,25 | 0,637411708 | 0,29  | 0,805949528 | 0,96  | 0,087769132 | 0,48  | 0,497932899 | -0,43 | 0,487945047 |
| Tmem39b   | -0,1  | 0,889269361 | -0,26 | 0,756267547 | 0,01  | 0,995401448 | 0,44  | 0,290272891 | -0,18 | 0,890396963 |
| Tmem40    | 0,09  | 0,918758168 | 0,23  | 0,673817783 | -0,12 | 0,860923344 | 0,01  | 0,990388217 | 0,02  | 0,982321176 |
| Tmem41a   | -0,49 | 0,277333992 | -1,06 | 0,200336704 | 0,32  | 0,660920525 | -0,26 | 0,798222195 | -0,61 | 0,542678129 |
| Tmem41b   | -0,5  | 0,472847723 | -0,09 | 0,923541688 | -0,2  | 0,805444672 | -0,38 | 0,499022095 | -0,11 | 0,925858284 |
| Tmem42    | -0,34 | 0,79498488  | -0,05 | 0,92551102  | 0,37  | 0,709317317 | -0,07 | 0,96366591  | 0,33  | 0,830263037 |
| Tmem43    | -0,05 | 0,922118639 | -0,5  | 0,324289795 | 0,35  | 0,547740903 | 0,85  | 0,289854197 | -0,06 | 0,969117862 |
| Tmem44    | -1,07 | 0,169976209 | -0,24 | 0,733269724 | 0,52  | 0,427882775 | -1,78 | 0,029404195 | -0,91 | 0,139695595 |
| Tmem45a   | -0,61 | 0,409977631 | 0,64  | 0,605851161 | 0,06  | 0,977967694 | -0,97 | 0,051621689 | 0,47  | 0,590339443 |
| Tmem45a2  | -0,5  | 0,811009431 | -0,37 | 0,649104789 | 0,44  | 0,534240899 | 0,23  | 0,672839807 | 0,23  | 0,851265372 |
| Tmem45b   | 0,3   | 0,421029929 | -0,16 | 0,794303155 | -0,34 | 0,67074385  | 0,05  | 0,942744943 | 0,22  | 0,80222716  |
| Tmem47    | -0,39 | 0,425529405 | -0,05 | 0,919762719 | 0,63  | 0,364441112 | 1,01  | 0,053873365 | 0,11  | 0,904830156 |
| Tmem5     | -0,56 | 0,163088889 | -0,32 | 0,561842393 | 0,74  | 0,144099096 | 0,56  | 0,153265608 | -0,21 | 0,773503402 |
| Tmem50a   | 0,28  | 0,468111704 | 0,02  | 0,976583732 | -0,06 | 0,948359548 | -0,53 | 0,196315893 | -0,19 | 0,765340194 |
| Tmem50b   | 0,2   | 0,736648392 | 0,56  | 0,311099792 | 0,47  | 0,685841838 | -0,72 | 0,173128097 | 0,71  | 0,28097058  |
| Tmem51    | 0,63  | 0,15490509  | 0,3   | 0,561411813 | 0,46  | 0,317781369 | 2,16  | 0,007677736 | 0,79  | 0,193179561 |
| Tmem51os1 | -0,02 | 0,989030713 | 0,12  | 0,904748854 | -0,12 | 0,926633738 | 0,18  | 0,791056607 | 0,57  | 0,255330178 |
| Tmem52    | -0,25 | 0,560461791 | 0,05  | 0,962138182 | -0,09 | 0,922318683 | 0,06  | 0,92406164  | -0,32 | 0,642685227 |
| Tmem52b   | 0,36  | 0,718996404 | 1,05  | 0,568175466 | -0,14 | 0,913228427 | -1,36 | 0,40199632  | -0,86 | 0,643580968 |
| Tmem53    | -0,26 | 0,704720946 | -0,22 | 0,832841509 | -0,23 | 0,747906037 | -0,03 | 0,968548873 | -0,39 | 0,508153495 |
| Tmem54    | 1,01  | 0,256112056 | 1,06  | 0,51825831  | 0,45  | 0,708522391 | 1,12  | 0,37151602  | 1,77  | 0,053907225 |
| Tmem55a   | -0,45 | 0,568104198 | -0,37 | 0,666450149 | -0,03 | 0,985347628 | 0,58  | 0,610095355 | -0,11 | 0,955137605 |
| Tmem55b   | 0,27  | 0,511005771 | 0,29  | 0,709432782 | 0,26  | 0,841494923 | -0,51 | 0,447063419 | 0,91  | 0,111570414 |
| Tmem56    | -0,24 | 0,70137787  | 0,23  | 0,712500402 | -0,04 | 0,966647226 | -0,15 | 0,806596364 | -0,02 | 0,984065984 |
| Tmem57    | -0,15 | 0,758636946 | -0,34 | 0,367968212 | 0,15  | 0,861877024 | 0,09  | 0,920521047 | -0,07 | 0,952971656 |
| Tmem59    | 0,44  | 0,312439966 | 0,12  | 0,873628464 | 0,63  | 0,281817897 | -0,34 | 0,588987424 | 0,06  | 0,960974478 |
| Tmem59l   | 0,06  | 0,959714813 | 0     | 0,999438768 | -0,18 | 0,805783058 | -0,39 | 0,45698422  | -0,45 | 0,583279373 |
| Tmem60    | 0,17  | 0,686560012 | -0,2  | 0,613379428 | 0,84  | 0,247700466 | 0,09  | 0,80795564  | -0,37 | 0,537240604 |

|           |       |             |       |             |       |             |       |             |       |             |
|-----------|-------|-------------|-------|-------------|-------|-------------|-------|-------------|-------|-------------|
| Tmem61    | -0,07 | 0,932531737 | -0,6  | 0,501438027 | 0,07  | 0,92807676  | 0,26  | 0,535672313 | -0,05 | 0,952753183 |
| Tmem62    | 0,14  | 0,816465857 | 0,09  | 0,941732128 | 1,19  | 0,063300744 | 0,03  | 0,987801512 | 0,58  | 0,699060093 |
| Tmem63a   | -0,21 | 0,736503749 | 0,04  | 0,964443806 | 0,32  | 0,625745801 | -1,26 | 0,013556826 | -0,24 | 0,68177827  |
| Tmem63b   | 0,05  | 0,936354359 | -0,17 | 0,807674009 | 0,21  | 0,72066129  | 0,02  | 0,979829655 | -0,41 | 0,417815739 |
| Tmem63c   | -0,86 | 0,109547175 | -0,23 | 0,880259895 | 0,02  | 0,993071391 | -0,16 | 0,881381562 | -0,13 | 0,917088334 |
| Tmem64    | -0,1  | 0,950155871 | -0,63 | 0,738762579 | -0,19 | 0,839096222 | -0,79 | 0,165153744 | -0,3  | 0,640616198 |
| Tmem65    | 0,31  | 0,560461791 | -0,2  | 0,808863849 | 0,24  | 0,864598204 | 1,23  | 0,136397086 | -0,09 | 0,965854499 |
| Tmem67    | 0,22  | 0,765328991 | 0,03  | 0,975959817 | -0,53 | 0,370554673 | -0,16 | 0,806596364 | 0,6   | 0,44205912  |
| Tmem68    | -0,7  | 0,223441106 | -0,07 | 0,984812702 | -0,04 | 0,990836784 | 0,15  | 0,881021748 | -0,33 | 0,727368758 |
| Tmem69    | -0,93 | 0,340726276 | -0,41 | 0,518494408 | 0,93  | 0,209534486 | 0,26  | 0,775197231 | 0,46  | 0,599965447 |
| Tmem70    | -0,12 | 0,833275012 | -0,21 | 0,762909702 | 0,26  | 0,809137779 | 0,15  | 0,769870404 | 0,13  | 0,876666201 |
| Tmem71    | -0,25 | 0,832696131 | -0,68 | 0,766425161 | 0,52  | 0,570314838 | -0,96 | 0,316523758 | -0,76 | 0,643382128 |
| Tmem72    | 0,15  | 0,866720868 | 0,09  | 0,936792848 | -0,51 | 0,433481425 | -0,24 | 0,771144265 | 0,41  | 0,613018522 |
| Tmem74    | 0,12  | 0,898746854 | -0,06 | 0,958433118 | -0,07 | 0,911921787 | -0,05 | 0,922338609 | 0,14  | 0,845453161 |
| Tmem74b   | 0,58  | 0,239601221 | 0,11  | 0,892916262 | -0,02 | 0,988051722 | 0,01  | 0,992906132 | -0,21 | 0,765256761 |
| Tmem74bos | 0,33  | 0,680794685 | 0,08  | 0,919841135 | 0,22  | 0,742758388 | 0,12  | 0,780418936 | 0,03  | 0,981677577 |
| Tmem79    | 0,29  | 0,842504427 | 0,51  | 0,8107747   | 0,79  | 0,181435656 | -0,16 | 0,871289126 | -0,66 | 0,2047166   |
| Tmem8     | -0,36 | 0,671795384 | 0,25  | 0,683695236 | 1,06  | 0,10941419  | -1,01 | 0,045013657 | 0,17  | 0,821727352 |
| Tmem80    | -0,16 | 0,852363306 | -0,06 | 0,939289739 | -0,25 | 0,870980915 | -0,36 | 0,233806806 | -0,4  | 0,573106355 |
| Tmem81    | 0,49  | 0,612555967 | -0,13 | 0,863359785 | 0     | 0,997394645 | -0,19 | 0,74128357  | -0,14 | 0,928724353 |
| Tmem82    | 0,17  | 0,911074343 | -0,44 | 0,585308878 | 0,2   | 0,752954039 | 0,53  | 0,405337222 | -0,21 | 0,847511999 |
| Tmem86a   | -0,49 | 0,233678699 | -0,2  | 0,695639666 | 0,15  | 0,843623661 | -0,9  | 0,140249087 | -0,65 | 0,312577954 |
| Tmem86b   | -0,11 | 0,856969531 | -0,16 | 0,894205636 | 0,09  | 0,967930981 | 0,48  | 0,365195906 | 0,66  | 0,39676125  |
| Tmem87a   | -0,33 | 0,530808572 | 0,3   | 0,540394017 | 0,12  | 0,931055805 | -0,92 | 0,111694099 | 0,14  | 0,868885122 |
| Tmem87b   | -0,07 | 0,969376455 | 0,79  | 0,437942228 | 0,49  | 0,778867371 | -0,73 | 0,096085093 | 0,63  | 0,20045565  |
| Tmem88    | 0,1   | 0,808947569 | -0,17 | 0,745921616 | -0,08 | 0,926779779 | 0,1   | 0,879527088 | -0,64 | 0,254342407 |
| Tmem88b   | 0,21  | 0,663760226 | -0,11 | 0,911319259 | -0,02 | 0,982305856 | 0,51  | 0,254212331 | -0,15 | 0,864415219 |
| Tmem89    | 0,07  | 0,891309235 | 0,14  | 0,74327464  | 0,09  | 0,894158243 | -0,19 | 0,597332937 | -0,1  | 0,927296036 |
| Tmem8b    | 0,28  | 0,541417213 | -0,48 | 0,30887     | 0,41  | 0,497279163 | 0,33  | 0,675151978 | -0,01 | 0,994865893 |
| Tmem8c    | -0,11 | 0,862124608 | 0,14  | 0,843011441 | 0,12  | 0,909371204 | -0,31 | 0,493856127 | -0,05 | 0,969994712 |
| Tmem9     | -0,65 | 0,171930166 | 0     | 1           | 0,69  | 0,435556279 | 0,4   | 0,728249817 | 0,6   | 0,443067005 |
| Tmem91    | 0,28  | 0,547611777 | -0,04 | 0,946864476 | -0,44 | 0,324321658 | 0,08  | 0,89865617  | 0,05  | 0,956901602 |
| Tmem92    | -0,04 | 0,964124037 | -0,21 | 0,851208256 | 0     | 0,997695003 | -0,23 | 0,6282575   | 0,03  | 0,974697564 |
| Tmem94    | -0,28 | 0,655952547 | -0,17 | 0,711176844 | 0,06  | 0,962354011 | -0,01 | 0,985817346 | -0,47 | 0,321730626 |
| Tmem95    | 0,36  | 0,574782523 | -0,18 | 0,931811048 | 0,11  | 0,933597343 | 0,41  | 0,68585056  | 0,1   | 0,932742551 |

|           |       |             |       |             |       |             |       |             |       |             |
|-----------|-------|-------------|-------|-------------|-------|-------------|-------|-------------|-------|-------------|
| Tmem97    | -0,32 | 0,816465857 | -0,8  | 0,10752682  | 0,64  | 0,469102587 | 1,08  | 0,44274172  | -0,09 | 0,975441362 |
| Tmem98    | -0,52 | 0,355791787 | -0,47 | 0,496860901 | -0,08 | 0,940489823 | 0,2   | 0,75887854  | -1,53 | 0,015349051 |
| Tmem9b    | 0,08  | 0,944652244 | 0,08  | 0,88741189  | -0,09 | 0,949101317 | 0,18  | 0,854985529 | 0,36  | 0,668008337 |
| Tmf1      | 0,11  | 0,892823025 | 0,11  | 0,818072947 | 0,32  | 0,483761569 | 0,92  | 0,077038116 | 0,15  | 0,854372876 |
| Tmie      | 0,45  | 0,552045598 | 0,26  | 0,66315423  | -0,21 | 0,751758339 | -1,98 | 0,016626616 | -0,88 | 0,164519422 |
| Tmigd1    | 0,07  | 0,948926586 | 0,08  | 0,924916733 | -0,69 | 0,153027841 | -1,63 | 0,037633713 | -0,33 | 0,84854054  |
| Tmigd3    | 0,35  | 0,627617113 | -1,14 | 0,277253387 | -0,14 | 0,85952125  | 1,27  | 0,019624978 | 0,14  | 0,833488713 |
| Tmlhe     | -0,01 | 0,996219097 | -0,29 | 0,767178812 | -0,04 | 0,977934465 | 1,24  | 0,138836131 | -0,5  | 0,622910734 |
| Tmod1     | 0,81  | 0,228584744 | 0,14  | 0,818072947 | 0,22  | 0,794567505 | -0,9  | 0,228083123 | -0,39 | 0,7255121   |
| Tmod2     | -0,52 | 0,474293292 | 0,74  | 0,290322318 | -0,36 | 0,742758388 | -0,68 | 0,233583206 | 0,42  | 0,654872635 |
| Tmod3     | -0,07 | 0,892823025 | 0,06  | 0,911319259 | -0,18 | 0,741623367 | 0,27  | 0,533965374 | 0,13  | 0,865721995 |
| Tmod4     | 0,27  | 0,663760226 | -0,05 | 0,959521149 | 0,09  | 0,929639429 | 0,24  | 0,639359737 | 0,34  | 0,62147827  |
| Tmpo      | -0,54 | 0,25387015  | -0,45 | 0,644818618 | 0,6   | 0,5092632   | 0,26  | 0,637949303 | 0,26  | 0,698525207 |
| Tmppe     | -0,74 | 0,307798337 | 0,27  | 0,716668427 | 0,12  | 0,906097666 | -0,1  | 0,87148686  | -0,26 | 0,738260196 |
| Tmprss11a | -0,07 | 0,928396151 | 0,19  | 0,77667467  | -0,03 | 0,976092199 | -0,49 | 0,288263001 | -0,24 | 0,662208123 |
| Tmprss11b | 0,25  | 0,602118092 | 0,01  | 0,9951682   | 0,35  | 0,607956353 | 0,36  | 0,31536298  | -0,02 | 0,981439632 |
| Tmprss11c | 0,33  | 0,515770167 | -0,16 | 0,828297866 | 0,08  | 0,922318683 | -0,31 | 0,37176143  | -0,21 | 0,731527639 |
| Tmprss11d | 0,19  | 0,672109239 | -0,05 | 0,956555856 | 0,07  | 0,921956183 | 0,22  | 0,549779663 | 0,06  | 0,961749007 |
| Tmprss11e | -0,1  | 0,926316023 | -0,17 | 0,879707211 | -0,22 | 0,83528423  | -0,02 | 0,994639223 | -0,4  | 0,765809384 |
| Tmprss11f | 0,19  | 0,800209334 | 0,14  | 0,88266895  | 0,21  | 0,751758339 | -0,19 | 0,71158821  | 0,19  | 0,78960943  |
| Tmprss11g | 0,03  | 0,982842179 | -0,3  | 0,732044571 | -0,3  | 0,514610288 | -0,01 | 0,992183086 | 0,19  | 0,820905831 |
| Tmprss12  | -0,23 | 0,687662951 | -0,06 | 0,975427696 | 0,07  | 0,950725218 | 0,29  | 0,401230688 | -0,04 | 0,955137605 |
| Tmprss13  | 0,21  | 0,724829885 | -0,15 | 0,807463629 | -0,09 | 0,908297156 | -0,09 | 0,877717342 | -0,17 | 0,874716101 |
| Tmprss15  | -0,16 | 0,735429196 | 0,34  | 0,656204868 | 0,02  | 0,991568687 | -0,24 | 0,793099857 | -0,45 | 0,571269331 |
| Tmprss2   | 0,13  | 0,902628825 | 0,01  | 0,999395995 | -0,26 | 0,804576742 | -0,06 | 0,942739047 | 0,13  | 0,911034257 |
| Tmprss3   | 0,3   | 0,462803939 | 0,33  | 0,642775877 | 0,2   | 0,749456891 | -0,26 | 0,601688484 | 0,22  | 0,760401775 |
| Tmprss4   | 0,27  | 0,662416763 | 0,51  | 0,621658056 | -0,1  | 0,933212016 | -0,27 | 0,787615739 | -0,1  | 0,910083563 |
| Tmprss5   | -0,23 | 0,795659022 | -0,31 | 0,435489861 | 0,02  | 0,993231654 | 0,4   | 0,36184569  | 0,26  | 0,744117522 |
| Tmprss6   | 0,2   | 0,814888638 | 0,14  | 0,824471857 | 0,41  | 0,547368463 | 0,32  | 0,45844771  | -0,07 | 0,946425043 |
| Tmprss7   | 0,04  | 0,959985598 | 0,12  | 0,884087392 | -0,01 | 0,993379272 | -0,15 | 0,857884225 | -0,16 | 0,894779776 |
| Tmprss9   | 0,24  | 0,761457464 | 0,25  | 0,802979985 | 0,07  | 0,937222375 | -0,42 | 0,212357498 | -0,2  | 0,745958051 |
| Tmsb10    | 0,15  | 0,7494877   | 0,26  | 0,554469164 | -0,31 | 0,798320169 | 0,34  | 0,337938676 | 0,35  | 0,523184505 |
| Tmsb15a   | 0,24  | 0,656726345 | -0,23 | 0,877602011 | -0,02 | 0,990836784 | -0,06 | 0,948271051 | -0,15 | 0,828679046 |
| Tmsb15b1  | 0,4   | 0,728539265 | -1,11 | 0,293750976 | 0,14  | 0,824084853 | 0,49  | 0,514962191 | 0,02  | 0,985577642 |
| Tmsb15l   | 0,15  | 0,814888638 | 0,19  | 0,732847182 | 0,02  | 0,984407511 | -0,07 | 0,951229436 | -0,35 | 0,694503201 |

|           |       |             |       |             |       |             |       |             |       |             |
|-----------|-------|-------------|-------|-------------|-------|-------------|-------|-------------|-------|-------------|
| Tmsb4x    | 0,08  | 0,877539178 | -0,1  | 0,828219939 | -0,35 | 0,736837174 | 1,2   | 0,065441734 | 0,34  | 0,637685701 |
| Tmtc1     | 0,71  | 0,169313016 | 2,51  | 0,040620931 | -1,38 | 0,045360114 | -4,92 | 0,003009221 | -0,17 | 0,824818547 |
| Tmtc2     | -0,01 | 0,997842309 | -1,76 | 0,158696948 | 0,45  | 0,650169259 | 0,35  | 0,659409324 | -0,07 | 0,97425848  |
| Tmtc3     | -0,12 | 0,838208309 | -0,07 | 0,919762719 | 0,39  | 0,481896699 | 0,74  | 0,169160611 | 0,15  | 0,860759487 |
| Tmtc4     | 0,05  | 0,964272364 | 1,01  | 0,152199284 | 0,12  | 0,928233014 | -0,61 | 0,494989103 | 1,05  | 0,20389911  |
| Tmub1     | 0,01  | 0,990162934 | 0,29  | 0,628151214 | -0,32 | 0,624087446 | -0,92 | 0,19005982  | 0,06  | 0,96738578  |
| Tmub2     | -0,04 | 0,964272364 | 0,11  | 0,902148738 | -0,32 | 0,547368463 | -0,09 | 0,904971257 | 0,15  | 0,882728747 |
| Tmx1      | -0,53 | 0,260634235 | -0,43 | 0,65931908  | 0,34  | 0,72132637  | 0,3   | 0,547796639 | 0,35  | 0,58573866  |
| Tmx2      | 0,05  | 0,953868772 | 0,01  | 0,992585488 | 0,28  | 0,587174496 | -0,29 | 0,460872291 | -0,02 | 0,981677577 |
| Tmx3      | -0,27 | 0,723274949 | -0,05 | 0,948048585 | -0,41 | 0,599364835 | 0,03  | 0,959958662 | 0,12  | 0,869831411 |
| Tmx4      | 0,21  | 0,841140165 | 0,28  | 0,57675818  | -0,45 | 0,70635953  | 0,41  | 0,334794661 | 0,33  | 0,777805633 |
| Tnc       | -1,14 | 0,164672104 | -0,55 | 0,48206644  | 0,62  | 0,433481425 | 4,49  | 0,003907268 | -1,19 | 0,066051582 |
| Tnf       | -0,48 | 0,434641897 | 0,57  | 0,46025541  | -0,05 | 0,986692159 | 0,76  | 0,284963612 | 0,46  | 0,374083269 |
| Tnfaip1   | -0,47 | 0,261843547 | 0,1   | 0,92585897  | 0,16  | 0,756337516 | 0,95  | 0,154860627 | 0,05  | 0,966951657 |
| Tnfaip2   | 0,26  | 0,601066205 | -0,44 | 0,590722193 | -0,07 | 0,968677508 | -1,12 | 0,023328447 | -0,21 | 0,775753249 |
| Tnfaip3   | -0,05 | 0,928246602 | -0,11 | 0,808498635 | -0,13 | 0,90672161  | 0,72  | 0,173468279 | 0,23  | 0,751537762 |
| Tnfaip6   | -0,59 | 0,599261435 | 0,46  | 0,656204868 | -0,12 | 0,940489823 | -0,1  | 0,86815986  | 0,24  | 0,797167184 |
| Tnfaip8   | 1,73  | 0,097395165 | 0,47  | 0,708684603 | -0,31 | 0,789802954 | -0,27 | 0,752208331 | -0,49 | 0,479454706 |
| Tnfaip8I1 | -0,48 | 0,373794253 | -0,11 | 0,829238025 | 0,93  | 0,056067478 | 0,95  | 0,32072628  | -0,49 | 0,648312151 |
| Tnfaip8I2 | 0,24  | 0,656726345 | -0,07 | 0,912137323 | -0,15 | 0,845651772 | 0,54  | 0,49308144  | 0,19  | 0,729772738 |
| Tnfaip8I3 | 0,46  | 0,549538339 | -0,27 | 0,549208729 | -1,32 | 0,428556311 | -0,65 | 0,588987424 | -0,6  | 0,608004947 |
| Tnfrsf10b | -0,22 | 0,648730873 | -0,08 | 0,888759454 | 0,08  | 0,905517618 | 0,86  | 0,085964255 | 0,01  | 0,994116818 |
| Tnfrsf11a | -0,17 | 0,893143496 | 0,11  | 0,873978756 | -0,36 | 0,809062815 | 0,21  | 0,755398563 | 0,84  | 0,153676649 |
| Tnfrsf11b | -0,1  | 0,924139727 | 0,65  | 0,428093777 | 0,58  | 0,464651123 | 0,87  | 0,357869114 | 1,23  | 0,115102746 |
| Tnfrsf12a | 0,48  | 0,203077527 | 0,82  | 0,106577435 | 0,17  | 0,835611996 | 0,88  | 0,13999659  | 0,64  | 0,392063771 |
| Tnfrsf13b | 0,2   | 0,76339907  | -0,36 | 0,706028548 | -0,32 | 0,712697139 | 0,19  | 0,713435933 | 0,07  | 0,947437555 |
| Tnfrsf13c | 0,26  | 0,569100385 | -0,19 | 0,824372931 | -0,34 | 0,557758269 | 0,25  | 0,666828628 | 0,19  | 0,839474287 |
| Tnfrsf14  | 0,55  | 0,612156115 | 1,12  | 0,094438943 | -0,68 | 0,436171764 | 0,35  | 0,412460103 | 1,34  | 0,024119434 |
| Tnfrsf17  | 0,18  | 0,905414735 | -0,15 | 0,752804236 | -0,09 | 0,918291931 | 0,31  | 0,397058624 | 0,2   | 0,775441452 |
| Tnfrsf18  | 0,06  | 0,957780226 | -0,31 | 0,781665479 | -1,22 | 0,224747376 | -0,39 | 0,699241026 | -0,2  | 0,883154336 |
| Tnfrsf19  | 0,48  | 0,40477934  | 0,31  | 0,703923817 | 0,28  | 0,783326867 | -1,62 | 0,272219745 | 0,51  | 0,801987865 |
| Tnfrsf1a  | 0,15  | 0,707994482 | 0,11  | 0,834220463 | -0,39 | 0,500075811 | -0,46 | 0,185926554 | 0,21  | 0,720742956 |
| Tnfrsf1b  | 0,03  | 0,963914207 | 0,43  | 0,291180284 | -0,21 | 0,823890116 | 0,86  | 0,173600687 | 0,48  | 0,576452248 |
| Tnfrsf21  | -0,51 | 0,212091984 | -0,2  | 0,695689103 | 0,15  | 0,885134763 | 1,71  | 0,026263662 | -0,22 | 0,823098095 |
| Tnfrsf22  | -0,01 | 0,989017567 | -0,02 | 0,993068441 | 0,55  | 0,628048897 | 0,03  | 0,970931237 | -0,18 | 0,814438115 |

|           |       |             |       |             |       |             |       |             |       |             |
|-----------|-------|-------------|-------|-------------|-------|-------------|-------|-------------|-------|-------------|
| Tnfrsf23  | -0,06 | 0,964154899 | 0,33  | 0,599495018 | 0,24  | 0,85163752  | 1,61  | 0,110657093 | -0,28 | 0,867083528 |
| Tnfrsf25  | 0,6   | 0,469692532 | 0,52  | 0,654719935 | -1,2  | 0,109628477 | -0,05 | 0,962616064 | -0,78 | 0,229375311 |
| Tnfrsf26  | -0,32 | 0,68194299  | 0,09  | 0,927582737 | 0,17  | 0,874098993 | -0,42 | 0,468562522 | -0,78 | 0,346861365 |
| Tnfrsf4   | 0     | 0,998017023 | -0,44 | 0,740950263 | 0,51  | 0,374422909 | -0,2  | 0,611675751 | 0,03  | 0,980287043 |
| Tnfrsf8   | -1,05 | 0,151560276 | 0,16  | 0,793603525 | 0,85  | 0,332065223 | 1,39  | 0,12482407  | 0,24  | 0,863049278 |
| Tnfrsf9   | 0,92  | 0,173695409 | 0,16  | 0,786394409 | 0,46  | 0,548288344 | 5,96  | 0,007986109 | -0,23 | 0,924867043 |
| Tnfsf10   | 1,09  | 0,24489967  | 1,35  | 0,072228425 | -1,51 | 0,081005692 | -0,54 | 0,274415093 | 1,9   | 0,008416112 |
| Tnfsf11   | 0     | 0,999042849 | -0,09 | 0,881171171 | -0,27 | 0,672766751 | -0,06 | 0,883339799 | -0,43 | 0,618079407 |
| Tnfsf12   | -0,24 | 0,827116244 | -0,39 | 0,635138707 | 0,16  | 0,867543859 | -0,41 | 0,248595843 | -0,25 | 0,642685227 |
| Tnfsf13   | -0,46 | 0,546065357 | 0,21  | 0,917256002 | 0,08  | 0,932866273 | -0,36 | 0,726953267 | 0,19  | 0,880202418 |
| Tnfsf13b  | 0,4   | 0,586458491 | 0,04  | 0,959239915 | -0,05 | 0,947881687 | 0,01  | 0,995029729 | 0,48  | 0,533852533 |
| Tnfsf13os | 0,47  | 0,64866902  | -0,05 | 0,924598673 | -0,05 | 0,956570063 | 0,52  | 0,256290074 | 0,28  | 0,773125975 |
| Tnfsf14   | -0,25 | 0,562065081 | -0,04 | 0,955872959 | -0,03 | 0,979791644 | 0,07  | 0,891253074 | -0,19 | 0,811321326 |
| Tnfsf15   | -0,21 | 0,794532611 | 0,14  | 0,906029701 | -0,07 | 0,973341568 | -0,12 | 0,87616247  | 0,43  | 0,837163687 |
| Tnfsf18   | 1,44  | 0,328445973 | 3     | 0,106641953 | -0,23 | 0,872313115 | 0,59  | 0,585901571 | 0,11  | 0,962525821 |
| Tnfsf4    | -0,13 | 0,92554413  | 0,33  | 0,846168635 | 0,07  | 0,923258105 | -0,17 | 0,907406741 | 0,07  | 0,972590168 |
| Tnfsf8    | 0,18  | 0,894555208 | 0,21  | 0,880892852 | -0,78 | 0,153783119 | 0,35  | 0,438725241 | 0,14  | 0,860591136 |
| Tnfsf9    | -0,08 | 0,966775766 | 0,32  | 0,807175471 | 0,84  | 0,116607178 | -3,56 | 0,003907268 | -0,03 | 0,978604922 |
| Tnik      | -0,56 | 0,436969639 | -0,42 | 0,428565008 | 0,95  | 0,215429632 | 0,46  | 0,339308325 | -0,1  | 0,92741476  |
| Tnip1     | 0,31  | 0,586458491 | 0,35  | 0,756778611 | -0,1  | 0,925245169 | 1,76  | 0,041009258 | 0,2   | 0,731865047 |
| Tnip2     | -0,27 | 0,706900702 | 0,08  | 0,911024505 | 0,16  | 0,849342965 | 0,04  | 0,960885529 | 0,28  | 0,747828814 |
| Tnip3     | 0,08  | 0,895523206 | -0,23 | 0,740618526 | 0,35  | 0,550994751 | 0,16  | 0,696843539 | 0,13  | 0,844213516 |
| Tnk1      | 0,22  | 0,718901325 | 0,14  | 0,894676428 | 0,14  | 0,806044178 | 0,1   | 0,858659989 | -0,28 | 0,675282484 |
| Tnk2      | -0,75 | 0,139999287 | -0,52 | 0,56444197  | 0,48  | 0,675047768 | 0,27  | 0,505670384 | -0,53 | 0,368554903 |
| Tnk2os    | -0,07 | 0,965991176 | 0,34  | 0,858860016 | 0,17  | 0,841563482 | -0,17 | 0,87811903  | 0,81  | 0,511962622 |
| Tnks      | -0,12 | 0,849867944 | -0,07 | 0,931100468 | 0,09  | 0,940489823 | 0,04  | 0,936955674 | -0,02 | 0,984125319 |
| Tnks1bp1  | -0,39 | 0,42677652  | -0,14 | 0,831580851 | 0,58  | 0,23323402  | 0,09  | 0,838031265 | -0,22 | 0,694233384 |
| Tnks2     | 0,12  | 0,78476082  | 0,3   | 0,428093777 | 0,23  | 0,718448905 | 0,83  | 0,203580306 | 0,04  | 0,975200543 |
| Tnmd      | 0,41  | 0,656726345 | -0,17 | 0,906267371 | 0,71  | 0,304899885 | 0,22  | 0,848930763 | -0,31 | 0,731865047 |
| Tnn       | -0,08 | 0,886741208 | 0,18  | 0,903089182 | -0,07 | 0,909729307 | -0,21 | 0,845164782 | -0,13 | 0,927296036 |
| Tnnc1     | 0,1   | 0,939317944 | -0,34 | 0,785244931 | 0,04  | 0,970969012 | 0,42  | 0,627089222 | -0,5  | 0,542647134 |
| Tnnc2     | -0,09 | 0,916074217 | 0,61  | 0,439938322 | -0,25 | 0,716261194 | -0,37 | 0,512902457 | -0,15 | 0,826379382 |
| Tnni1     | 0,01  | 0,993175772 | -0,94 | 0,16219325  | 0,81  | 0,184686828 | 1,85  | 0,040875837 | -0,1  | 0,934344891 |
| Tnni2     | -0,02 | 0,983849271 | 0,29  | 0,800636573 | -0,18 | 0,767822182 | -0,34 | 0,554988456 | -0,01 | 0,994974941 |
| Tnni3     | 0,7   | 0,208116361 | 0,02  | 0,980771647 | -1,48 | 0,03223798  | -0,02 | 0,965949619 | 1,13  | 0,05100134  |

|          |       |             |       |             |       |             |       |             |       |             |
|----------|-------|-------------|-------|-------------|-------|-------------|-------|-------------|-------|-------------|
| Tnni3k   | 0,33  | 0,520667704 | 0,07  | 0,955382206 | -0,46 | 0,556088253 | 0,08  | 0,893958719 | 0,05  | 0,96761263  |
| Tnnt1    | -0,12 | 0,897759442 | -0,73 | 0,547180632 | 0,08  | 0,917368903 | 0,81  | 0,521617569 | -0,24 | 0,884247878 |
| Tnnt2    | -0,78 | 0,351881265 | -0,33 | 0,772558681 | 0,99  | 0,088950678 | 0,79  | 0,292700007 | 0     | 0,997254437 |
| Tnnt3    | 0     | 0,998769353 | -0,22 | 0,586289005 | -0,19 | 0,70924995  | 0,28  | 0,571641129 | 0,42  | 0,532954694 |
| Tnp1     | -0,27 | 0,578515102 | 0,11  | 0,811092266 | 0,04  | 0,963484965 | -0,03 | 0,962670023 | 0,16  | 0,818887323 |
| Tnp2     | 0,07  | 0,936611783 | 0,09  | 0,852461907 | -0,22 | 0,719709872 | -0,04 | 0,963676043 | 0,2   | 0,840952901 |
| Tnpo1    | -0,32 | 0,565453765 | -0,37 | 0,498607981 | 0,43  | 0,662451176 | 0,71  | 0,092770439 | 0,29  | 0,615772692 |
| Tnpo2    | -0,09 | 0,922407098 | -0,08 | 0,874448335 | 0,39  | 0,516427247 | 0,62  | 0,392084928 | -0,06 | 0,966951657 |
| Tnpo3    | -0,18 | 0,697992827 | -0,06 | 0,895578147 | 0,3   | 0,551231299 | 0,58  | 0,197646348 | 0,1   | 0,91314596  |
| Tnr      | 0,12  | 0,930710746 | -0,4  | 0,615311543 | -0,13 | 0,862441091 | 0,28  | 0,765822989 | 0,03  | 0,981079016 |
| Tnrc18   | -0,17 | 0,829198831 | -0,07 | 0,926157704 | 0,28  | 0,704122998 | 0,27  | 0,409576257 | 0,36  | 0,493920965 |
| Tnrc6a   | 0,08  | 0,921722224 | 0,05  | 0,956998711 | -0,12 | 0,840113881 | 0,4   | 0,448719761 | 0,18  | 0,827104937 |
| Tnrc6b   | 0,41  | 0,424529546 | 0,48  | 0,261054232 | -0,42 | 0,419537272 | 0,19  | 0,661977311 | 0,29  | 0,587305934 |
| Tnrc6c   | -0,41 | 0,502600185 | -0,27 | 0,626354464 | 0,61  | 0,592642641 | -1,44 | 0,015893503 | -0,81 | 0,067219139 |
| Tns1     | -0,35 | 0,295694434 | -0,14 | 0,831580851 | -0,51 | 0,339425194 | -0,99 | 0,035685356 | -0,7  | 0,170921075 |
| Tns2     | -0,78 | 0,194005514 | 0,09  | 0,906234611 | -0,14 | 0,843394396 | -1,63 | 0,006455698 | -0,74 | 0,097593946 |
| Tns3     | -0,45 | 0,464156384 | 0,03  | 0,9777932   | 0,27  | 0,779486228 | 1,11  | 0,05386085  | -0,09 | 0,915296984 |
| Tns4     | 0,02  | 0,978853388 | 0,26  | 0,739080134 | -0,09 | 0,922318683 | -0,01 | 0,989985514 | 0,1   | 0,939448119 |
| Tnxb     | 0,13  | 0,833900133 | -0,04 | 0,971801869 | -0,48 | 0,30251646  | -3,63 | 0,004331967 | -0,9  | 0,122922652 |
| Tob1     | -0,22 | 0,654286341 | 0     | 0,998237793 | -0,47 | 0,598076555 | -1,41 | 0,024473745 | -0,02 | 0,984125319 |
| Tob2     | -0,16 | 0,754255105 | 0,23  | 0,75062635  | -0,19 | 0,864151343 | -0,15 | 0,87613802  | 0,06  | 0,97872616  |
| Toe1     | -0,88 | 0,202613112 | -0,16 | 0,716668427 | 0,13  | 0,920158784 | 0,2   | 0,894462471 | 0,26  | 0,890957032 |
| Tollip   | -0,11 | 0,794704597 | 0,05  | 0,945756882 | -0,09 | 0,888476376 | -0,04 | 0,970534463 | 0,04  | 0,978550794 |
| Tom1     | 0,03  | 0,963738499 | 0,25  | 0,835326417 | 0,67  | 0,193794324 | -0,74 | 0,378102359 | 0,36  | 0,673120647 |
| Tom1l1   | 0     | 0,998017023 | -0,43 | 0,609522549 | 0,87  | 0,37686469  | -1,07 | 0,107563158 | -0,78 | 0,412193279 |
| Tom1l2   | -0,28 | 0,517149278 | -0,1  | 0,875474041 | -0,37 | 0,628048897 | -0,75 | 0,131321325 | -0,42 | 0,455257329 |
| Tommm20  | -0,28 | 0,568067613 | -0,03 | 0,981758111 | -0,06 | 0,948492928 | 0,52  | 0,177569419 | -0,14 | 0,821140509 |
| Tommm20l | 0,18  | 0,754095492 | -0,31 | 0,803870841 | -0,16 | 0,829285065 | 0,09  | 0,898801714 | -0,62 | 0,316401979 |
| Tommm22  | -0,37 | 0,423595612 | 0,35  | 0,612645853 | 0,24  | 0,715547198 | 0,47  | 0,371522408 | 0,2   | 0,845218636 |
| Tommm34  | -0,02 | 0,983663467 | -0,33 | 0,501055005 | -0,48 | 0,588879542 | -0,36 | 0,521617569 | -0,66 | 0,249774523 |
| Tommm40  | -0,67 | 0,189644465 | -0,61 | 0,468402736 | 0,67  | 0,225514917 | 0,43  | 0,32398458  | -0,81 | 0,104257693 |
| Tommm40l | -0,14 | 0,805666248 | -0,16 | 0,937424389 | 0,83  | 0,089775868 | -0,01 | 0,999818406 | -0,48 | 0,639892765 |
| Tommm5   | -0,19 | 0,687662951 | -0,32 | 0,604914697 | 0,12  | 0,862376532 | 0,75  | 0,185540234 | 0,28  | 0,698115018 |
| Tommm6   | 0,04  | 0,94815841  | -0,28 | 0,526101975 | 0,33  | 0,628048897 | -0,05 | 0,921731995 | -0,4  | 0,45660227  |
| Tommm6os | -0,04 | 0,949362206 | 0     | 1           | -0,25 | 0,670568581 | 0,06  | 0,907406741 | -0,14 | 0,855111264 |

|          |       |             |       |             |       |             |       |             |       |             |
|----------|-------|-------------|-------|-------------|-------|-------------|-------|-------------|-------|-------------|
| Tomm7    | -0,03 | 0,960052101 | -0,3  | 0,490062205 | 0,26  | 0,559099664 | 0,07  | 0,858659989 | 0,29  | 0,682134021 |
| Tomm70a  | -0,51 | 0,306829062 | -0,36 | 0,325242663 | 0,13  | 0,890842571 | 1,34  | 0,028029755 | 0,31  | 0,635418734 |
| Tomt     | 0,32  | 0,715858944 | 0,1   | 0,924138252 | 0,26  | 0,757306958 | -0,43 | 0,325923875 | -0,07 | 0,950965682 |
| Tonsl    | 0,08  | 0,898269435 | -0,46 | 0,628442147 | 0,56  | 0,269619863 | 0,44  | 0,603611964 | -0,97 | 0,198832044 |
| Top1     | 0,67  | 0,178589155 | 0,22  | 0,707524747 | 0,02  | 0,988661889 | 0,49  | 0,325056024 | 0,29  | 0,658272945 |
| Top1mt   | -0,5  | 0,321181267 | 0,55  | 0,400101233 | -0,51 | 0,392080366 | -0,25 | 0,483157344 | -0,46 | 0,442579293 |
| Top2a    | -1,75 | 0,089282283 | -1,63 | 0,114444312 | 1,78  | 0,051134303 | 2,78  | 0,011121575 | -0,71 | 0,335679372 |
| Top2b    | -0,27 | 0,790580834 | -0,03 | 0,973112447 | -0,13 | 0,838289412 | 0,48  | 0,655702995 | 0,65  | 0,544938455 |
| Top3a    | -0,03 | 0,981412917 | 0,18  | 0,782652703 | -0,1  | 0,936167504 | 0,46  | 0,380444012 | 0,5   | 0,410701945 |
| Top3b    | -0,42 | 0,372648236 | 0,2   | 0,792290003 | 0,47  | 0,521989794 | -0,5  | 0,45976466  | -0,11 | 0,920355527 |
| Topaz1   | -0,01 | 0,9905233   | -0,07 | 0,953198116 | -0,18 | 0,839669459 | 0,07  | 0,939446012 | -0,11 | 0,9162287   |
| Topbp1   | -0,56 | 0,254980266 | -0,83 | 0,205273528 | 1,15  | 0,096304296 | 0,99  | 0,122000926 | -0,03 | 0,980961333 |
| Topors   | -0,22 | 0,626534172 | 0,08  | 0,877660987 | -0,12 | 0,844191447 | -0,56 | 0,116103358 | 0,01  | 0,993413582 |
| Toporsl  | 0,02  | 0,98297164  | 0,05  | 0,965872249 | -0,09 | 0,929871006 | -0,16 | 0,766679066 | -0,14 | 0,86811326  |
| Toporsos | -0,25 | 0,697992827 | 0     | 1           | 0,52  | 0,512995479 | -0,27 | 0,561974365 | 0,29  | 0,719430166 |
| Tor1a    | 0,08  | 0,9124306   | -0,17 | 0,759873892 | 0,16  | 0,836625711 | 0,29  | 0,453676073 | 0,09  | 0,917844354 |
| Tor1aip1 | 0,22  | 0,683707839 | 0,24  | 0,709432782 | -0,05 | 0,964509282 | 0,15  | 0,829189554 | 0,63  | 0,325920244 |
| Tor1aip2 | 0,19  | 0,791297234 | 0,67  | 0,214378713 | 0,4   | 0,598179126 | 1,02  | 0,194460147 | 0,56  | 0,578347905 |
| Tor1b    | -0,18 | 0,810129283 | -0,27 | 0,652758123 | 0,05  | 0,954051244 | -0,16 | 0,642906557 | -0,35 | 0,470021545 |
| Tor2a    | 0,03  | 0,970938013 | -0,04 | 0,961206626 | -0,08 | 0,925417014 | 0,15  | 0,885417869 | 0,02  | 0,984125319 |
| Tor3a    | 0,35  | 0,474777426 | 0,5   | 0,297762088 | 0,06  | 0,963199274 | -0,38 | 0,289769731 | 0,46  | 0,574224514 |
| Tor4a    | -0,42 | 0,625617202 | -0,58 | 0,290322318 | 0,13  | 0,888956864 | -0,33 | 0,473075261 | -0,61 | 0,202472453 |
| Tox      | -0,01 | 0,993175772 | -0,27 | 0,815973308 | -0,15 | 0,871176083 | -0,37 | 0,747912066 | -0,03 | 0,986849867 |
| Tox2     | 0,1   | 0,891798972 | -0,11 | 0,939400268 | -0,54 | 0,397813485 | 0,08  | 0,926898299 | 0,32  | 0,613836622 |
| Tox3     | 0,29  | 0,692761089 | -0,4  | 0,666450149 | -0,05 | 0,936840991 | 0,22  | 0,643150861 | 0,45  | 0,616797608 |
| Tox4     | 0,12  | 0,868649724 | 0,16  | 0,852461907 | -0,24 | 0,694941328 | 0,65  | 0,190726804 | 0,41  | 0,466383943 |
| Tpbg     | 0,08  | 0,892141122 | -0,04 | 0,944460866 | 0,9   | 0,12691088  | -0,29 | 0,496236806 | -0,11 | 0,909294188 |
| Tpbgl    | -0,26 | 0,823402057 | -0,34 | 0,710334352 | 0,53  | 0,462123525 | 0,15  | 0,778773256 | -0,19 | 0,868602248 |
| Tpbpa    | 0,57  | 0,460231397 | -0,33 | 0,518998821 | -0,04 | 0,976042637 | 0,17  | 0,690659674 | -0,32 | 0,530189977 |
| Tpbpb    | 0,21  | 0,727387897 | 0,34  | 0,442001356 | 0,06  | 0,969928932 | -0,42 | 0,326253852 | -0,23 | 0,753328965 |
| Tpcn1    | -1,01 | 0,214430522 | -0,84 | 0,339235652 | 0,68  | 0,447140999 | 0,07  | 0,902095386 | -1,27 | 0,065506394 |
| Tpcn2    | 0,05  | 0,955321816 | 0,02  | 0,98859071  | -0,16 | 0,853040826 | 0     | 0,998945465 | 0,18  | 0,814567383 |
| Tpd52    | 0,12  | 0,826190054 | 0,67  | 0,40873647  | 0,73  | 0,412427594 | -0,69 | 0,399472679 | 0,39  | 0,634076489 |
| Tpd52l1  | -0,01 | 0,996998625 | 0,25  | 0,568187167 | 0,25  | 0,745313546 | -0,24 | 0,53532034  | -0,23 | 0,757855068 |
| Tpd52l2  | 0,28  | 0,610509826 | 0,31  | 0,467853942 | 0,02  | 0,982984296 | 0,74  | 0,169916512 | 0,06  | 0,962872595 |

|         |       |             |       |             |       |             |       |             |       |             |
|---------|-------|-------------|-------|-------------|-------|-------------|-------|-------------|-------|-------------|
| Tpgs1   | -0,29 | 0,485549215 | -0,11 | 0,857503073 | 0,38  | 0,757740418 | 0,12  | 0,776797043 | 0,07  | 0,933759514 |
| Tpgs2   | -0,07 | 0,908569912 | -0,68 | 0,220176471 | 0,11  | 0,880706627 | 0,2   | 0,749765256 | 0,24  | 0,755677288 |
| Tph1    | -0,08 | 0,932324918 | 0,29  | 0,467853942 | -0,42 | 0,814575035 | -0,15 | 0,695515516 | -0,01 | 0,993865559 |
| Tph2    | 0,16  | 0,869565514 | 0,3   | 0,703923817 | -0,11 | 0,909975745 | -0,81 | 0,109316844 | -0,28 | 0,653769438 |
| Tpi1    | 0,35  | 0,464411244 | -0,02 | 0,9860901   | 0,54  | 0,246877306 | 1,47  | 0,016043404 | -0,63 | 0,199143903 |
| Tpk1    | -1    | 0,355124955 | -0,12 | 0,970832543 | 0,12  | 0,930866621 | -0,62 | 0,378308626 | -0,73 | 0,319313273 |
| Tpm1    | -0,2  | 0,827974901 | -0,34 | 0,697354745 | 0,4   | 0,611145451 | 2,45  | 0,009399265 | -0,05 | 0,953971867 |
| Tpm2    | -0,11 | 0,924139727 | 0,51  | 0,314703215 | 0,69  | 0,536712236 | -0,81 | 0,080225573 | 0,21  | 0,824818547 |
| Tpm3    | 0,59  | 0,473832525 | 0,84  | 0,532181703 | -0,38 | 0,738557284 | -1,37 | 0,170433555 | 0,05  | 0,975441362 |
| Tpm4    | -0,32 | 0,587552401 | 0,22  | 0,786930449 | -0,13 | 0,879127552 | 0,68  | 0,152938593 | 0,09  | 0,929127539 |
| Tpmt    | -0,45 | 0,54401985  | 0,3   | 0,83456599  | 0,23  | 0,849342965 | 0,19  | 0,903602868 | 1,3   | 0,119306657 |
| Tpo     | 0,04  | 0,953269094 | 0,13  | 0,894563348 | -0,04 | 0,96736975  | -0,07 | 0,872899312 | 0,07  | 0,92741476  |
| Tpp1    | -0,05 | 0,940095939 | 0,64  | 0,191605725 | 0,04  | 0,961464515 | 0,01  | 0,983166423 | 0,02  | 0,984125319 |
| Tpp2    | 0,27  | 0,491095255 | 0,36  | 0,499573414 | 0,08  | 0,935168506 | 0,67  | 0,104977592 | 0,34  | 0,562557824 |
| Tppp    | -0,36 | 0,666383292 | -1,1  | 0,109267475 | 0,04  | 0,978207511 | 0,21  | 0,845767749 | -0,46 | 0,636598087 |
| Tppp2   | 0,13  | 0,782586323 | 0,3   | 0,80192513  | -0,08 | 0,955365521 | 0,05  | 0,975655831 | -0,32 | 0,752873495 |
| Tppp3   | 0,22  | 0,829299665 | -1,07 | 0,141157706 | 0,41  | 0,541363142 | -0,75 | 0,055073402 | -0,78 | 0,173631164 |
| Tpr     | -0,19 | 0,657124524 | -0,14 | 0,842663656 | 0,15  | 0,882540073 | 0,2   | 0,603471344 | 0,23  | 0,699060093 |
| Tpra1   | 0,24  | 0,613990129 | -0,18 | 0,801257272 | -0,01 | 0,991568687 | -0,01 | 0,988205241 | -0,1  | 0,894623317 |
| Tprg    | 0     | 1           | -0,28 | 0,51825831  | 0,06  | 0,940464217 | 0,13  | 0,874904932 | -0,06 | 0,960974478 |
| Tprgl   | -0,47 | 0,235549559 | -0,07 | 0,935329426 | 0,2   | 0,755781659 | -0,49 | 0,415968391 | -0,3  | 0,660989136 |
| Tprkb   | -0,29 | 0,736503749 | -0,11 | 0,886783077 | -0,15 | 0,881815785 | -0,53 | 0,619134782 | 0,47  | 0,745134899 |
| Tprn    | -0,38 | 0,421957622 | -0,63 | 0,426088176 | 0,39  | 0,578938863 | -0,19 | 0,808985118 | -0,18 | 0,919867638 |
| Tpsab1  | 0,06  | 0,947436857 | -0,25 | 0,779072675 | -0,65 | 0,743732051 | 0,14  | 0,873812847 | -0,28 | 0,816013994 |
| Tpsb2   | 0,4   | 0,370606588 | -0,48 | 0,667502888 | -1,29 | 0,637321546 | 0,36  | 0,510094799 | -0,03 | 0,979456872 |
| Tpsg1   | 0,43  | 0,640002115 | 0,18  | 0,747728608 | 0,24  | 0,765512875 | -0,25 | 0,543829463 | 0,1   | 0,884640084 |
| Tpst1   | 0,03  | 0,963177119 | 0,24  | 0,583246827 | -0,09 | 0,953074345 | 0,03  | 0,956803614 | 0,37  | 0,433916911 |
| Tpst2   | 0,07  | 0,926316023 | -0,15 | 0,755498335 | 0,1   | 0,904239687 | -0,33 | 0,480121746 | -0,16 | 0,845218636 |
| Tpt1    | 0,24  | 0,471980619 | 0,1   | 0,828219939 | -0,11 | 0,836731535 | 0,02  | 0,963752888 | 0,11  | 0,86811326  |
| Tpte    | 0,31  | 0,565823399 | -0,02 | 0,994567885 | -0,54 | 0,379231825 | -0,1  | 0,922740736 | 0,03  | 0,984125319 |
| Tpx2    | -1,13 | 0,173359555 | -1,96 | 0,087315688 | 1,5   | 0,04421786  | 2,98  | 0,026435879 | -0,28 | 0,829729297 |
| Tra2a   | -0,12 | 0,847127381 | 0,25  | 0,594803422 | -0,78 | 0,068894819 | 0,19  | 0,729999055 | 1,38  | 0,018242947 |
| Tra2b   | -0,07 | 0,892559851 | -0,19 | 0,677026666 | -0,12 | 0,849697489 | -0,14 | 0,709570719 | 0,16  | 0,792305774 |
| Trabd   | -0,2  | 0,700610923 | -0,12 | 0,903595287 | -0,51 | 0,371340619 | 0,84  | 0,307744759 | 0,46  | 0,665178099 |
| Trabd2b | -0,42 | 0,657124524 | -0,22 | 0,840214526 | 0,04  | 0,979791644 | -0,04 | 0,956277039 | -0,29 | 0,791800359 |



|          |       |             |       |             |       |             |       |             |       |             |
|----------|-------|-------------|-------|-------------|-------|-------------|-------|-------------|-------|-------------|
| Tradd    | -0,47 | 0,287459734 | -0,15 | 0,859932049 | 0,2   | 0,765490406 | 0,24  | 0,655780295 | -0,01 | 0,988374688 |
| Traf1    | 0,41  | 0,472739337 | 0,35  | 0,738762579 | -0,05 | 0,969570532 | 1,3   | 0,075520945 | 0,29  | 0,735152891 |
| Traf2    | -0,09 | 0,874037681 | -0,24 | 0,715733316 | -0,02 | 0,982305856 | 0,28  | 0,743170266 | 0,05  | 0,974939495 |
| Traf3    | 0,04  | 0,972370484 | 0,3   | 0,804394095 | 0,61  | 0,39810038  | 0,37  | 0,692179512 | 0,07  | 0,957289526 |
| Traf3ip1 | -0,26 | 0,761457464 | 0,36  | 0,69843     | 0,02  | 0,981447994 | -0,64 | 0,164099998 | 0,06  | 0,948117662 |
| Traf3ip2 | 0,73  | 0,277154156 | 0,57  | 0,212039473 | -0,19 | 0,850547289 | 0,07  | 0,896599656 | 0,68  | 0,111284498 |
| Traf3ip3 | 0,08  | 0,90799109  | 0,04  | 0,970020205 | 0,32  | 0,737325159 | -0,52 | 0,178335102 | -0,27 | 0,731982784 |
| Traf4    | -1,25 | 0,152857269 | -0,63 | 0,411059412 | 1,06  | 0,290123118 | 1,49  | 0,011121575 | 0,11  | 0,935708361 |
| Traf5    | -0,35 | 0,68161851  | 0,27  | 0,726204935 | 0,2   | 0,860094776 | -0,5  | 0,571108168 | 0,09  | 0,952753183 |
| Traf6    | 0,31  | 0,65525391  | -0,29 | 0,728434379 | 0,04  | 0,987563007 | 0,53  | 0,34632078  | -0,1  | 0,920355527 |
| Traf7    | -0,3  | 0,397054492 | -0,28 | 0,536246395 | 0,46  | 0,272277033 | 0,47  | 0,350800181 | -0,31 | 0,625751363 |
| Trafd1   | 0,75  | 0,157853388 | 1,08  | 0,127073819 | -1,21 | 0,006274682 | 0,33  | 0,700924597 | 1,39  | 0,05788468  |
| Traip    | -0,18 | 0,858182276 | -0,8  | 0,311099792 | 0,93  | 0,083866478 | 1,14  | 0,028363085 | 0,12  | 0,86570087  |
| Trak1    | -0,25 | 0,494679097 | -0,03 | 0,964442082 | 0,08  | 0,906360615 | 0,55  | 0,2423686   | -0,27 | 0,76521225  |
| Trak2    | -0,25 | 0,52759316  | -0,44 | 0,578047349 | 0,42  | 0,602928717 | -0,17 | 0,689858793 | -0,14 | 0,840036408 |
| Tram1    | -0,29 | 0,488559658 | -0,08 | 0,857732355 | 0,35  | 0,417082373 | 0,21  | 0,602988996 | -0,25 | 0,650806881 |
| Tram111  | 0,07  | 0,899359458 | -0,5  | 0,655607331 | 0,08  | 0,943144399 | -0,93 | 0,4272539   | -0,74 | 0,641928139 |
| Tram2    | -0,37 | 0,276476434 | -0,34 | 0,473401429 | 0,13  | 0,855523214 | 1,64  | 0,037611998 | -0,14 | 0,918288793 |
| Trank1   | -0,15 | 0,801995171 | 0     | 1           | -0,16 | 0,802903713 | -0,04 | 0,92678264  | -0,36 | 0,432621109 |
| Trap1    | -0,16 | 0,752654071 | -0,19 | 0,663288343 | -0,02 | 0,989156005 | 0,54  | 0,284968897 | -0,03 | 0,980961333 |
| Trap1a   | 0,01  | 0,989346684 | -0,13 | 0,814283558 | -0,06 | 0,934767777 | 0,14  | 0,737836742 | -0,15 | 0,828679046 |
| Trappc1  | -0,2  | 0,683707839 | -0,39 | 0,450997698 | -0,24 | 0,814576808 | 0,79  | 0,156679335 | -0,21 | 0,885872093 |
| Trappc10 | 0,81  | 0,187868882 | 1,18  | 0,396493445 | -1,17 | 0,193368921 | -1,75 | 0,071229953 | 0,1   | 0,904931004 |
| Trappc11 | -0,12 | 0,85029103  | 0,14  | 0,828219939 | -0,02 | 0,990836784 | -0,1  | 0,877053477 | 0,44  | 0,404813316 |
| Trappc12 | -0,79 | 0,099229964 | -0,11 | 0,901000778 | 0,27  | 0,752157341 | -0,08 | 0,932800758 | 0,16  | 0,888634933 |
| Trappc13 | -0,2  | 0,701900253 | -0,4  | 0,499573414 | 0,6   | 0,542758274 | 0,33  | 0,750633939 | 0,03  | 0,984125319 |
| Trappc2  | -0,17 | 0,813467786 | 0,01  | 0,997619997 | 0,75  | 0,605363924 | 0,32  | 0,690488202 | -0,08 | 0,94758725  |
| Trappc2l | 0,3   | 0,559760851 | -0,17 | 0,691433995 | 0,08  | 0,943069255 | 0,52  | 0,14358888  | -0,32 | 0,68987325  |
| Trappc3  | -0,07 | 0,908569912 | -0,12 | 0,866248527 | -0,46 | 0,303590987 | 0,42  | 0,344978832 | 0,06  | 0,959263411 |
| Trappc3l | -0,01 | 0,992748202 | 0,14  | 0,89081665  | 0,1   | 0,911634383 | 0,03  | 0,961864701 | -0,04 | 0,969720149 |
| Trappc4  | 0,27  | 0,502600185 | 0,03  | 0,961370411 | -0,1  | 0,868938606 | 0,5   | 0,163529439 | 0,23  | 0,692397745 |
| Trappc5  | -0,09 | 0,902359494 | 0,09  | 0,934294134 | 0,35  | 0,503838324 | -0,86 | 0,376817809 | 0,22  | 0,869403669 |
| Trappc6a | 0,48  | 0,189644465 | 0,23  | 0,626836996 | -0,03 | 0,978657055 | 0,36  | 0,533941098 | 0,08  | 0,927908317 |
| Trappc6b | 0,05  | 0,944291635 | 0,03  | 0,980916182 | 0,15  | 0,841669036 | -0,49 | 0,2831982   | 0,31  | 0,615976951 |
| Trappc8  | -0,3  | 0,576695743 | -0,22 | 0,596528787 | 1,12  | 0,324321658 | -0,48 | 0,17854439  | -0,01 | 0,992997824 |

|               |       |             |       |             |       |             |       |             |       |             |
|---------------|-------|-------------|-------|-------------|-------|-------------|-------|-------------|-------|-------------|
| Trappc9       | -0,04 | 0,948926586 | -0,32 | 0,764672565 | -0,12 | 0,899941244 | 0,53  | 0,365971139 | -0,28 | 0,744907709 |
| Trat1         | 0,28  | 0,493444352 | -0,02 | 0,992175086 | -0,23 | 0,716261194 | -0,11 | 0,750989679 | 0,24  | 0,719978183 |
| Trav12-2      | -0,07 | 0,92069393  | -0,32 | 0,590926908 | 0     | 0,997268369 | 0,61  | 0,250749402 | 0,07  | 0,948163009 |
| Trav12n-2     | 0,26  | 0,658266451 | 0,19  | 0,736902992 | -0,38 | 0,608068994 | 0,22  | 0,811505154 | 0,08  | 0,948759136 |
| Trav14-1      | 0,3   | 0,557114011 | 0,18  | 0,709743701 | -0,27 | 0,622546805 | -0,05 | 0,914828446 | 0,06  | 0,938142591 |
| Trav14d-3-dv8 | 0,01  | 0,984972115 | 0     | 1           | -0,08 | 0,933384842 | -0,04 | 0,918094663 | 0,02  | 0,980961333 |
| Trav16d-dv11  | 0,51  | 0,279793863 | -0,04 | 0,943915456 | -0,19 | 0,771873685 | 0,52  | 0,233806806 | 0,47  | 0,337186649 |
| Trav19        | 0,16  | 0,764288636 | -0,06 | 0,906777728 | -0,2  | 0,746662626 | -0,63 | 0,221786246 | -0,13 | 0,910083563 |
| Trav3-3       | 0,29  | 0,524475604 | 0,26  | 0,664380401 | -0,03 | 0,977126842 | -0,1  | 0,773739766 | 0,18  | 0,827032122 |
| Trav3-4       | 0,23  | 0,754653765 | 0     | 0,998237793 | -0,08 | 0,91472848  | -0,02 | 0,962291481 | 0,13  | 0,851207222 |
| Trav3n-3      | -0,25 | 0,576406658 | 0,05  | 0,935329426 | -0,02 | 0,983439952 | -0,19 | 0,832383062 | 0,09  | 0,935708361 |
| Trav4d-4      | 0,17  | 0,669220209 | -0,12 | 0,817110093 | -0,01 | 0,995007689 | 0,13  | 0,74162714  | -0,04 | 0,956660468 |
| Trav6-3       | -0,36 | 0,421957622 | 0,19  | 0,732847182 | -0,17 | 0,813180174 | -0,35 | 0,412023167 | 0,48  | 0,544064731 |
| Trav6d-6      | 0,23  | 0,593540946 | 0,02  | 0,972706967 | 0,01  | 0,991568687 | 0,03  | 0,954851353 | 0,03  | 0,973428839 |
| Trav7-4       | 0,12  | 0,802427928 | 0,06  | 0,900801202 | 0,16  | 0,847506224 | 0,22  | 0,640584782 | -0,15 | 0,870864709 |
| Trav7d-4      | 0,17  | 0,764957267 | -0,17 | 0,816018979 | 0,14  | 0,830685724 | -0,02 | 0,986768223 | 0,01  | 0,992370267 |
| Trav9d-3      | 0,06  | 0,937251448 | -0,15 | 0,766425161 | 0,26  | 0,667627312 | 0,22  | 0,682070739 | 0,18  | 0,842936569 |
| Trav9d-4      | -1,02 | 0,132157697 | -0,03 | 0,989873399 | -0,4  | 0,702423238 | 0,27  | 0,784300926 | -0,13 | 0,90992791  |
| Trbv1         | 0,34  | 0,534017117 | 0     | 1           | -0,1  | 0,911894304 | 0     | 0,996769706 | 0,21  | 0,85508146  |
| Trbv13-2      | 0,1   | 0,958188047 | 0,58  | 0,29546111  | -0,15 | 0,909793191 | -0,35 | 0,655202878 | -0,53 | 0,780016298 |
| Trcg1         | -0,06 | 0,950837484 | 0,53  | 0,336433977 | -0,24 | 0,746588628 | -0,33 | 0,601688484 | 0,06  | 0,968799126 |
| Trdmt1        | -0,66 | 0,376983801 | 0,07  | 0,936414321 | -0,18 | 0,908448118 | 0,46  | 0,775756066 | 0,93  | 0,582645174 |
| Trdn          | 0,55  | 0,433013961 | -0,24 | 0,829248009 | 0,02  | 0,990836784 | 0     | 0,999559327 | -0,33 | 0,50321372  |
| Treh          | -0,21 | 0,710325158 | -0,26 | 0,577539302 | 0,08  | 0,933384842 | 0,54  | 0,22512259  | -0,25 | 0,697757911 |
| Trem1         | -0,21 | 0,739833092 | 0,34  | 0,881113709 | 0,19  | 0,920828015 | 0,03  | 0,979039536 | -0,09 | 0,936447878 |
| Trem2         | 0,26  | 0,761457464 | 0,24  | 0,882589938 | -0,26 | 0,683305382 | -0,08 | 0,948213844 | 0,24  | 0,751971541 |
| Trem3         | -0,07 | 0,958535933 | 0,34  | 0,783325809 | 0,78  | 0,650169259 | -0,03 | 0,972597648 | 0,11  | 0,939930189 |
| Trem11        | -0,31 | 0,738448626 | 0,28  | 0,822796092 | 0,56  | 0,602775092 | 0,46  | 0,242691189 | 0,45  | 0,456067812 |
| Trem12        | -0,15 | 0,841140165 | -0,64 | 0,391122953 | -0,02 | 0,985347628 | 0,26  | 0,740451724 | 0,12  | 0,916841901 |
| Trem14        | 0,08  | 0,949236157 | -0,17 | 0,868839934 | -0,2  | 0,794830621 | 0,62  | 0,224135088 | 0,05  | 0,964566958 |
| Tref1         | -0,25 | 0,68194299  | -0,2  | 0,74031644  | 0,84  | 0,203107553 | -1,79 | 0,006048812 | -0,68 | 0,360718516 |
| Trex1         | 0,94  | 0,279386788 | 0,59  | 0,300718094 | -0,54 | 0,189460036 | -0,02 | 0,970931237 | 0,67  | 0,166318063 |
| Trex2         | -0,07 | 0,928435159 | -0,23 | 0,720667099 | -0,23 | 0,739644111 | 0,51  | 0,292154066 | 0,16  | 0,863819335 |
| Trf           | -0,36 | 0,728778101 | -0,92 | 0,286908359 | 0,17  | 0,880574524 | 0,19  | 0,859859031 | -1,26 | 0,163953683 |
| Trgv2         | 0,99  | 0,49976831  | -0,44 | 0,463954617 | -0,07 | 0,932866273 | 0,36  | 0,493036987 | 0,21  | 0,760555206 |

|             |       |             |       |             |       |             |       |             |       |             |
|-------------|-------|-------------|-------|-------------|-------|-------------|-------|-------------|-------|-------------|
| Trh         | 0,08  | 0,903268859 | 0,18  | 0,710814404 | 0,09  | 0,881463812 | -0,1  | 0,800026427 | 0,07  | 0,934128771 |
| Trhde       | 0,55  | 0,260634235 | 0,12  | 0,907169389 | -0,01 | 0,996265665 | -0,15 | 0,733028982 | 0,25  | 0,75684867  |
| Trhr        | 0,59  | 0,31190427  | -0,35 | 0,734096329 | -0,42 | 0,533114844 | -0,38 | 0,632395203 | 0,12  | 0,893737959 |
| Trhr2       | 0,06  | 0,965703244 | -0,08 | 0,950486453 | 0,09  | 0,909126689 | 0,17  | 0,829193043 | 0,03  | 0,975441362 |
| Triap1      | -0,46 | 0,655130976 | -0,09 | 0,894022563 | 0,18  | 0,898935616 | -0,19 | 0,800853287 | -0,84 | 0,38432665  |
| Trib1       | 0,75  | 0,175830295 | 0,67  | 0,145146608 | -0,66 | 0,167702488 | 0,19  | 0,626884812 | 0,19  | 0,78960943  |
| Trib2       | -0,75 | 0,27425637  | -0,57 | 0,263692874 | 0,5   | 0,523680014 | -1,51 | 0,146690702 | -1,11 | 0,266832581 |
| Trib3       | 0,67  | 0,458945277 | 0,48  | 0,555336098 | 0     | 0,998479176 | 0,6   | 0,247679503 | 0,02  | 0,981439632 |
| Tril        | -0,61 | 0,397054492 | -0,31 | 0,848071065 | 0,15  | 0,849342965 | -1,69 | 0,057381138 | -1,14 | 0,047253015 |
| Trim10      | 1,06  | 0,083421478 | 0,76  | 0,186259968 | -0,05 | 0,952518202 | 0,15  | 0,849201167 | 0,29  | 0,763240477 |
| Trim11      | -0,1  | 0,869565514 | 0,3   | 0,501438027 | -0,02 | 0,986912078 | -0,3  | 0,599145596 | -0,12 | 0,911034257 |
| Trim13      | 0,47  | 0,586970138 | 0,4   | 0,638598252 | -0,41 | 0,766796774 | 0,27  | 0,763366023 | 0,32  | 0,827532593 |
| Trim14      | -0,06 | 0,963228289 | -0,15 | 0,932209849 | -0,34 | 0,537547784 | -0,2  | 0,729299699 | -0,37 | 0,545166604 |
| Trim15      | 0,91  | 0,24489967  | 0,4   | 0,483436169 | -1,05 | 0,196405438 | 0,03  | 0,970163463 | 0,27  | 0,815693459 |
| Trim16      | -0,53 | 0,218444456 | -0,73 | 0,274017201 | 0,02  | 0,985817024 | -0,53 | 0,250385956 | -0,08 | 0,934615324 |
| Trim17      | 0,08  | 0,919567534 | 0,14  | 0,751382934 | -0,04 | 0,970387898 | -0,25 | 0,563786734 | -0,07 | 0,940438527 |
| Trim2       | -0,37 | 0,489715979 | 0,27  | 0,792434435 | 0,21  | 0,737241227 | -0,21 | 0,564749161 | -0,03 | 0,980945466 |
| Trim21      | 0,65  | 0,249044729 | 0,66  | 0,471355059 | -1,15 | 0,176443489 | -0,13 | 0,921774207 | 1,83  | 0,054271655 |
| Trim23      | 0,02  | 0,987965359 | -0,26 | 0,756702969 | 0,43  | 0,560847022 | 0,04  | 0,98238337  | 0,24  | 0,900126162 |
| Trim24      | 0,25  | 0,655624944 | -0,22 | 0,729423334 | 0,09  | 0,943144399 | -0,09 | 0,874607411 | -0,23 | 0,72846861  |
| Trim25      | 0,54  | 0,249044729 | 0,6   | 0,172014551 | -0,95 | 0,044715282 | -0,62 | 0,225077375 | 0,52  | 0,462558109 |
| Trim26      | 0,13  | 0,87419877  | 0,21  | 0,73623784  | -0,17 | 0,824084853 | 0,22  | 0,50808678  | 0,78  | 0,198883002 |
| Trim27      | -0,39 | 0,645158882 | 0,02  | 0,978904487 | 0,42  | 0,398389729 | 1,01  | 0,337787225 | 0,3   | 0,8024387   |
| Trim28      | -0,64 | 0,185492478 | -0,41 | 0,501438027 | 0,28  | 0,721952929 | 0,62  | 0,220875656 | -0,35 | 0,69063878  |
| Trim29      | -0,04 | 0,947630317 | 0,08  | 0,883145635 | -0,34 | 0,443039118 | 0,28  | 0,49601881  | 0,27  | 0,784375319 |
| Trim3       | -0,31 | 0,525053882 | -0,21 | 0,581931436 | 0,54  | 0,157676953 | 0,67  | 0,059120064 | 0     | 0,995918051 |
| Trim30a     | 1,91  | 0,017672591 | 2,57  | 0,208373622 | -2,31 | 0,044715282 | -1,9  | 0,171625869 | 1,66  | 0,045311431 |
| Trim30b     | -0,03 | 0,981777139 | 0,17  | 0,905229684 | -0,06 | 0,969262382 | 0,23  | 0,728293649 | 0,76  | 0,213688308 |
| Trim30d     | 0,96  | 0,253512837 | 1,47  | 0,0535509   | -1,17 | 0,062420645 | 0,13  | 0,806596364 | 1,63  | 0,016687099 |
| Trim30e-ps1 | 0,19  | 0,703606438 | 0,08  | 0,941258271 | -0,15 | 0,83213665  | 0,14  | 0,848431901 | 0,29  | 0,702402249 |
| Trim31      | -0,13 | 0,9230183   | 0,04  | 0,978689001 | -0,17 | 0,816081776 | -0,27 | 0,678009232 | -0,16 | 0,889106241 |
| Trim32      | -0,07 | 0,953740954 | -0,09 | 0,915297775 | 0,84  | 0,263873104 | -0,53 | 0,382581233 | -0,5  | 0,677687906 |
| Trim33      | -0,21 | 0,730833439 | 0,26  | 0,729172466 | 0,45  | 0,516673908 | -0,06 | 0,907350266 | 0,2   | 0,801385411 |
| Trim34a     | 0,47  | 0,260634235 | 0,15  | 0,809963911 | -1,19 | 0,09059546  | -0,1  | 0,842011593 | 0,3   | 0,610321928 |
| Trim35      | -0,24 | 0,791808536 | 0,01  | 0,998345861 | -0,89 | 0,191706163 | 0,15  | 0,864424908 | 0,07  | 0,943231038 |

|         |       |             |       |             |       |             |       |             |       |             |
|---------|-------|-------------|-------|-------------|-------|-------------|-------|-------------|-------|-------------|
| Trim36  | -0,14 | 0,874467978 | 0,14  | 0,814896288 | 0,29  | 0,591520086 | 0,61  | 0,393201346 | 0,55  | 0,639345637 |
| Trim37  | -0,58 | 0,448827508 | -0,36 | 0,766492323 | 0,99  | 0,177783684 | 0,12  | 0,879866481 | -0,03 | 0,979643119 |
| Trim38  | 0     | 0,996998625 | 0,44  | 0,557096406 | 0,18  | 0,717856288 | -0,85 | 0,5144446   | -0,44 | 0,728578071 |
| Trim39  | 0,02  | 0,979362045 | 0     | 0,999395995 | 0,53  | 0,380898605 | -0,39 | 0,55776895  | -0,06 | 0,952200672 |
| Trim40  | 0,36  | 0,664826805 | -0,1  | 0,923044405 | -0,13 | 0,867571963 | -0,01 | 0,99282298  | -0,24 | 0,763240477 |
| Trim41  | -0,67 | 0,351889801 | 0,11  | 0,854578468 | 0,34  | 0,674947565 | -0,16 | 0,730461667 | -0,43 | 0,394403137 |
| Trim42  | 0,31  | 0,746700079 | -0,15 | 0,882589938 | -0,23 | 0,76370647  | 0,29  | 0,572854044 | 0,49  | 0,321326363 |
| Trim43a | 0,31  | 0,707440816 | 0,28  | 0,692957522 | 0,19  | 0,813287877 | -0,14 | 0,87811903  | 0,6   | 0,524829864 |
| Trim43b | 0,1   | 0,908569912 | -0,6  | 0,505089058 | -0,47 | 0,242013904 | 0,3   | 0,603611964 | -0,3  | 0,664283099 |
| Trim43c | 0,18  | 0,841140165 | -0,43 | 0,761413306 | -0,51 | 0,473723328 | 0,91  | 0,067975729 | 1,31  | 0,02019977  |
| Trim44  | -0,03 | 0,960720096 | 0,13  | 0,903682621 | 0,02  | 0,993379272 | -0,35 | 0,437773588 | -0,09 | 0,890744062 |
| Trim45  | 0,43  | 0,421029929 | 0,18  | 0,857490594 | 0,46  | 0,584107565 | -0,19 | 0,875729708 | -0,23 | 0,84640312  |
| Trim46  | -0,01 | 0,995438679 | -0,06 | 0,943915456 | 0,04  | 0,9780054   | 0,77  | 0,077398185 | -0,25 | 0,752187547 |
| Trim47  | -0,74 | 0,226269901 | -0,26 | 0,716437544 | 0,22  | 0,76318151  | -0,43 | 0,232954672 | -0,37 | 0,525299501 |
| Trim50  | -0,02 | 0,98225675  | 0,16  | 0,808222835 | -0,14 | 0,807786405 | 0,12  | 0,856878607 | 0,16  | 0,82482852  |
| Trim52  | 0     | 0,998031456 | 0,3   | 0,804025406 | 0,19  | 0,880706627 | -0,29 | 0,490176405 | -0,15 | 0,890957032 |
| Trim54  | 0,02  | 0,965116762 | 0     | 1           | 0,15  | 0,892306682 | 0,03  | 0,94835703  | 0,03  | 0,972578221 |
| Trim55  | 0,51  | 0,321798414 | -0,09 | 0,896383881 | 0,59  | 0,259550802 | 0,29  | 0,70397934  | 0,54  | 0,497340464 |
| Trim56  | 0,33  | 0,630133896 | 0,54  | 0,29767135  | -0,34 | 0,69871815  | -1,04 | 0,025699992 | 0,17  | 0,764124978 |
| Trim58  | -0,2  | 0,780773609 | 0,07  | 0,949876961 | 0,28  | 0,703045192 | 0,07  | 0,920036779 | 0,51  | 0,393448838 |
| Trim59  | -0,15 | 0,785669218 | -0,17 | 0,887005798 | 0,38  | 0,513446928 | 0,23  | 0,663121129 | -0,27 | 0,825751733 |
| Trim6   | -0,04 | 0,983184832 | 0,09  | 0,926075536 | -0,18 | 0,823478881 | 0,14  | 0,878757115 | -0,39 | 0,673120647 |
| Trim60  | 0,6   | 0,454132443 | 0,32  | 0,648582774 | -0,01 | 0,993686224 | 0,12  | 0,866389603 | -0,41 | 0,502676586 |
| Trim61  | 0,06  | 0,936051646 | -0,07 | 0,977463004 | 0,01  | 0,990836784 | 0,22  | 0,625944412 | -0,06 | 0,953297732 |
| Trim62  | -0,81 | 0,095509762 | -0,79 | 0,494161701 | -0,12 | 0,922318683 | -0,94 | 0,074366038 | -0,29 | 0,656756924 |
| Trim63  | -0,08 | 0,948926586 | 0,16  | 0,775155136 | 0,36  | 0,605049228 | -0,15 | 0,866712375 | -0,11 | 0,934185668 |
| Trim65  | -0,43 | 0,594945461 | -0,02 | 0,995205602 | -0,41 | 0,611573953 | -1,05 | 0,036180488 | -0,47 | 0,313564306 |
| Trim66  | 0,03  | 0,970938013 | -0,59 | 0,400515868 | -0,09 | 0,935460375 | 0,37  | 0,407097145 | 0,23  | 0,830086988 |
| Trim67  | 0,01  | 0,996662208 | 0,09  | 0,936502479 | -0,15 | 0,834122191 | -0,51 | 0,358502795 | -0,16 | 0,864415219 |
| Trim68  | 0,29  | 0,66609472  | 0,99  | 0,393251171 | 0,21  | 0,909126689 | -1,05 | 0,045711543 | -0,25 | 0,842792279 |
| Trim69  | 0,89  | 0,356646108 | -0,02 | 0,9860901   | 0,27  | 0,74860644  | -0,22 | 0,899335603 | 0,4   | 0,869675527 |
| Trim7   | -0,1  | 0,903817676 | 0,61  | 0,424068004 | 0,25  | 0,613697542 | -0,79 | 0,310358435 | -0,45 | 0,570730838 |
| Trim71  | -0,32 | 0,376151377 | -0,22 | 0,807175471 | -0,08 | 0,90345282  | -0,06 | 0,923853611 | -0,46 | 0,508153495 |
| Trim72  | 0,02  | 0,993175772 | 0,52  | 0,433021363 | 0,37  | 0,659555232 | 0,07  | 0,89859643  | -0,01 | 0,98847659  |
| Trim75  | 0,02  | 0,971724975 | 0,05  | 0,919873208 | -0,15 | 0,85092959  | 0,02  | 0,982212444 | -0,25 | 0,701887274 |

|          |       |             |       |             |       |             |       |             |       |             |
|----------|-------|-------------|-------|-------------|-------|-------------|-------|-------------|-------|-------------|
| Trim8    | 0,01  | 0,986904999 | 0,16  | 0,782652703 | 0,01  | 0,994130625 | -0,59 | 0,208874333 | -0,19 | 0,765340194 |
| Trim80   | -0,52 | 0,347812134 | -0,05 | 0,950876136 | -0,32 | 0,521569092 | -0,05 | 0,979735809 | -0,27 | 0,887943873 |
| Trim9    | -0,27 | 0,537345693 | -0,46 | 0,367842221 | -0,23 | 0,661220717 | -0,18 | 0,740120833 | -0,65 | 0,229454456 |
| Triml1   | 0,14  | 0,858748956 | -0,07 | 0,930983876 | -0,43 | 0,455889638 | 0,3   | 0,60204354  | 0,4   | 0,674532832 |
| Triml2   | -0,26 | 0,565823399 | 0,36  | 0,694017753 | -0,08 | 0,911921787 | -0,06 | 0,876758879 | 0,2   | 0,82465949  |
| Trio     | -0,08 | 0,906061277 | -0,31 | 0,626813483 | 0,12  | 0,859460126 | 0,14  | 0,820360895 | -0,49 | 0,431894609 |
| Triobp   | 0,24  | 0,586458491 | 0,24  | 0,752804236 | -0,08 | 0,935887545 | -0,19 | 0,845617958 | 0,35  | 0,708898543 |
| Trip10   | 0,29  | 0,5409797   | 0,21  | 0,705747563 | -0,02 | 0,987208663 | 0,07  | 0,898641987 | 0,41  | 0,374754544 |
| Trip11   | -0,13 | 0,797266879 | -0,12 | 0,839789639 | 0,09  | 0,909975745 | 0,3   | 0,411076198 | 0,61  | 0,18003283  |
| Trip12   | 0     | 0,999288019 | 0,18  | 0,780552139 | -0,09 | 0,914867655 | 0,12  | 0,828256292 | 0,14  | 0,843199194 |
| Trip13   | -0,98 | 0,364628239 | -1,34 | 0,414656674 | 1,89  | 0,032673349 | 1,78  | 0,096085093 | -0,23 | 0,824725869 |
| Trip4    | -0,14 | 0,921564669 | -0,01 | 0,998239324 | 0,15  | 0,865148119 | 0,13  | 0,924569336 | -0,45 | 0,728578071 |
| Trip6    | -0,27 | 0,500832169 | -0,32 | 0,625875078 | 0,14  | 0,814998518 | 0,09  | 0,943382435 | -0,19 | 0,878966527 |
| Triqk    | -0,3  | 0,808379727 | 0,15  | 0,84619405  | -0,85 | 0,460914763 | 0,69  | 0,669457175 | -0,64 | 0,765002083 |
| Trit1    | -0,24 | 0,737470342 | -0,31 | 0,803710289 | 0,46  | 0,493193538 | -0,07 | 0,913974287 | -0,02 | 0,987603478 |
| Trmo     | -0,2  | 0,833275012 | -0,42 | 0,648437757 | 0,66  | 0,311923216 | -0,31 | 0,711725901 | -0,4  | 0,763240477 |
| Trmt1    | -0,22 | 0,538609985 | -0,12 | 0,853569707 | 0,39  | 0,393736455 | 1,09  | 0,110180553 | -0,19 | 0,874342066 |
| Trmt10a  | 0,1   | 0,899663802 | 0,15  | 0,811280211 | -0,42 | 0,598378377 | 1,26  | 0,045809254 | 0,48  | 0,387681311 |
| Trmt10b  | -0,41 | 0,53662401  | 0,25  | 0,880363126 | 0,89  | 0,372132412 | -0,58 | 0,193611261 | -0,27 | 0,830813323 |
| Trmt10c  | -0,21 | 0,66235833  | -0,03 | 0,97875059  | 0,38  | 0,473499244 | 0,31  | 0,523589033 | 0,32  | 0,677838252 |
| Trmt11   | -0,47 | 0,396229003 | 0,13  | 0,898238238 | -0,32 | 0,800107725 | -0,55 | 0,331328372 | -0,49 | 0,478324516 |
| Trmt112  | 0,07  | 0,928499167 | 0,52  | 0,497219788 | -0,06 | 0,956570063 | -1,1  | 0,043472413 | -0,18 | 0,820373868 |
| Trmt12   | 0,11  | 0,917014629 | -0,12 | 0,852181157 | -0,16 | 0,842645515 | -0,63 | 0,33347682  | 0,05  | 0,977707446 |
| Trmt13   | 0,32  | 0,758636946 | 0,09  | 0,897634338 | 0,89  | 0,426442479 | -0,24 | 0,63561149  | -0,09 | 0,954880424 |
| Trmt1l   | -0,17 | 0,78663317  | 0,29  | 0,747360238 | -0,98 | 0,046960007 | 0,02  | 0,992183086 | 0,61  | 0,471406593 |
| Trmt2a   | -0,17 | 0,798561927 | 0,05  | 0,926157704 | 0,17  | 0,772829778 | -0,23 | 0,639359737 | -0,17 | 0,822497462 |
| Trmt2b   | -0,29 | 0,72989626  | -0,54 | 0,496860901 | -0,37 | 0,648438146 | 0,14  | 0,858410573 | -0,52 | 0,499998316 |
| Trmt44   | -0,11 | 0,866897194 | -0,34 | 0,726494244 | 0,38  | 0,607390293 | 0,09  | 0,932364636 | 0,09  | 0,937558003 |
| Trmt5    | -0,43 | 0,616135436 | -0,11 | 0,919602924 | 0,35  | 0,672683349 | 0,29  | 0,639359737 | -0,91 | 0,442579293 |
| Trmt6    | -0,56 | 0,393350488 | -0,49 | 0,657081303 | 1,54  | 0,034161362 | 0,09  | 0,920640884 | -0,31 | 0,655657337 |
| Trmt61a  | -0,24 | 0,816616632 | -0,65 | 0,231183878 | 0,56  | 0,678840444 | 0,79  | 0,441533217 | -0,93 | 0,33777407  |
| Trmt61b  | -0,57 | 0,421378808 | -0,16 | 0,882847123 | -0,33 | 0,555443611 | 0,21  | 0,77523305  | 0,51  | 0,524198649 |
| Trmu     | -0,62 | 0,651113395 | 0,02  | 0,991131565 | -0,31 | 0,721369858 | -0,84 | 0,06413548  | -0,55 | 0,442040974 |
| Trnau1ap | 0,1   | 0,833900133 | -0,26 | 0,596005021 | 0,12  | 0,946990162 | -0,5  | 0,340399099 | -0,16 | 0,841522773 |
| Trnp1    | 0,39  | 0,430173798 | -0,01 | 0,999210601 | 0,12  | 0,845321518 | -0,18 | 0,618209904 | -0,06 | 0,951236192 |

|           |       |             |       |             |       |             |       |             |       |             |
|-----------|-------|-------------|-------|-------------|-------|-------------|-------|-------------|-------|-------------|
| Trnt1     | 0,63  | 0,483282428 | 0,16  | 0,935329426 | 0,3   | 0,611144549 | 0,48  | 0,680503649 | 0,72  | 0,351536668 |
| Tro       | 0,37  | 0,656726345 | -0,32 | 0,568187167 | -0,72 | 0,434537881 | -0,8  | 0,238777496 | -0,22 | 0,879075155 |
| Troap     | -0,75 | 0,214139353 | -1,42 | 0,109267475 | 1,48  | 0,092969854 | 1,87  | 0,018183641 | 0,09  | 0,920355527 |
| Trove2    | 0,43  | 0,72337861  | 0,58  | 0,669354789 | -0,36 | 0,573669385 | 0,01  | 0,998526865 | -0,46 | 0,794517953 |
| Trp53     | -0,31 | 0,589294335 | -0,32 | 0,577539302 | 0     | 0,99954948  | 1,56  | 0,017463671 | -0,04 | 0,97206128  |
| Trp53bp1  | -0,5  | 0,256112056 | -0,05 | 0,949498992 | -0,1  | 0,869042622 | 0,38  | 0,37338484  | -0,32 | 0,570939418 |
| Trp53bp2  | -0,18 | 0,816710776 | -0,04 | 0,95098509  | -0,1  | 0,927950027 | 0,06  | 0,928002892 | -0,12 | 0,880134862 |
| Trp53cor1 | 0     | 0,998210173 | 0,3   | 0,571026746 | -0,28 | 0,607689093 | -0,14 | 0,814810741 | -0,2  | 0,855354002 |
| Trp53i11  | 0,12  | 0,761832919 | 0,11  | 0,874195024 | -0,28 | 0,545418833 | 1,76  | 0,041009258 | -0,34 | 0,815177988 |
| Trp53i13  | -0,27 | 0,67806773  | -0,6  | 0,362188015 | 0,46  | 0,423897495 | 0,52  | 0,178728278 | -0,04 | 0,97007243  |
| Trp53inp1 | -0,71 | 0,832696131 | -0,35 | 0,873107937 | 0,14  | 0,924808211 | -0,73 | 0,323176599 | -0,03 | 0,986767228 |
| Trp53inp2 | -0,4  | 0,302006612 | -0,52 | 0,700187424 | -0,04 | 0,963221639 | 0,28  | 0,769870404 | -0,75 | 0,242796082 |
| Trp53rkb  | -0,31 | 0,614878886 | -0,47 | 0,726494244 | -0,19 | 0,816883729 | -0,18 | 0,809153665 | 0,24  | 0,714047012 |
| Trp53tg5  | -0,14 | 0,868854341 | 0,3   | 0,493391321 | 0,12  | 0,874639384 | -0,06 | 0,920158794 | 0,1   | 0,916530193 |
| Trp63     | 0     | 0,999288019 | -0,04 | 0,956049982 | -0,16 | 0,832676098 | 0,06  | 0,927735789 | -0,19 | 0,823098095 |
| Trp73     | -0,11 | 0,89763852  | -0,01 | 0,992175086 | -0,07 | 0,947117869 | 0,23  | 0,651440131 | 0,32  | 0,655956123 |
| Trpa1     | 0,09  | 0,929113259 | 0,18  | 0,844500324 | -0,48 | 0,557758269 | -0,05 | 0,943565161 | 0,18  | 0,876927228 |
| Trpc1     | 0,32  | 0,857052622 | 0,4   | 0,47742142  | 1     | 0,101024489 | -1,58 | 0,009399265 | -0,44 | 0,540645977 |
| Trpc3     | -0,56 | 0,619148266 | 0,71  | 0,473838777 | 0,37  | 0,719386001 | -2,99 | 0,009073953 | -1,51 | 0,015668823 |
| Trpc4     | 0,1   | 0,86929214  | 0,32  | 0,600177044 | -0,06 | 0,941344852 | -0,43 | 0,491106928 | -0,36 | 0,717210217 |
| Trpc4ap   | -0,2  | 0,680520303 | -0,1  | 0,873107937 | -0,01 | 0,993379272 | 0,52  | 0,219489403 | -0,18 | 0,841883545 |
| Trpc5     | 0,44  | 0,550197782 | 0,35  | 0,698886888 | -0,59 | 0,259804772 | -0,34 | 0,322275797 | 0,06  | 0,959940191 |
| Trpc5os   | -0,08 | 0,923180948 | 0,01  | 0,995205602 | -0,01 | 0,990836784 | -0,23 | 0,624359865 | 0,36  | 0,450543672 |
| Trpc6     | -0,33 | 0,829889828 | 0,47  | 0,355820982 | -0,17 | 0,791940256 | -0,73 | 0,581988484 | 0,07  | 0,976743304 |
| Trpc7     | -0,12 | 0,843029805 | -0,33 | 0,774377142 | -0,02 | 0,983439952 | 0,17  | 0,817972323 | -0,3  | 0,61355523  |
| Trpd52l3  | 0,13  | 0,815649066 | -0,32 | 0,569612894 | -0,34 | 0,56948206  | 0,05  | 0,916072825 | -0,16 | 0,85508146  |
| Trpm1     | 0,37  | 0,62872508  | 0,01  | 0,995205602 | -0,16 | 0,856046789 | 0,31  | 0,449018564 | -0,09 | 0,939930189 |
| Trpm2     | 0,73  | 0,153824107 | 0,28  | 0,772415321 | 0,1   | 0,887947732 | -0,27 | 0,712188797 | -0,43 | 0,763240477 |
| Trpm3     | -0,12 | 0,848780666 | 0,04  | 0,965907062 | -0,18 | 0,853040826 | -1,76 | 0,049121256 | -0,86 | 0,268016026 |
| Trpm4     | -0,19 | 0,78682706  | 0,02  | 0,9860901   | 0,22  | 0,751090942 | -0,09 | 0,895880186 | -0,34 | 0,76942924  |
| Trpm5     | 0,43  | 0,417617334 | -0,15 | 0,83694781  | -0,5  | 0,359828293 | -0,1  | 0,866941509 | -0,23 | 0,70666786  |
| Trpm6     | 0,14  | 0,852874623 | 0,77  | 0,442884795 | -0,06 | 0,973404462 | -0,34 | 0,66020673  | -0,14 | 0,910083563 |
| Trpm7     | 0,15  | 0,808947569 | 0,19  | 0,794404033 | 0,06  | 0,96043738  | -0,28 | 0,426488138 | 0,45  | 0,401279597 |
| Trpm8     | 0,17  | 0,884190046 | 0,27  | 0,627205829 | -0,01 | 0,995662132 | 0,43  | 0,24812886  | 0,58  | 0,304393671 |
| Trps1     | -0,22 | 0,753012482 | -0,07 | 0,961370411 | -0,23 | 0,723037215 | 1,42  | 0,052175326 | 0,04  | 0,975986697 |

|          |       |             |       |             |       |             |       |             |       |             |
|----------|-------|-------------|-------|-------------|-------|-------------|-------|-------------|-------|-------------|
| Trpt1    | 0     | 0,999288019 | -0,6  | 0,615698474 | -0,37 | 0,598063616 | -0,49 | 0,40199632  | -0,19 | 0,848679763 |
| Trpv1    | 0,02  | 0,986216037 | 0,48  | 0,453958512 | -0,38 | 0,465949919 | -0,15 | 0,758875849 | 0,1   | 0,920710557 |
| Trpv2    | -0,56 | 0,432863869 | 0,14  | 0,88325516  | 0,14  | 0,934354994 | 1,18  | 0,037337273 | -0,58 | 0,471421027 |
| Trpv3    | -0,21 | 0,653954984 | 0,06  | 0,944131807 | -0,07 | 0,922318683 | -0,63 | 0,347270841 | 0,01  | 0,992694729 |
| Trpv4    | -0,36 | 0,790694396 | -0,65 | 0,666450149 | 0,6   | 0,546857162 | -2,5  | 0,003977829 | -0,76 | 0,097375935 |
| Trpv5    | 0,77  | 0,153824107 | 0,21  | 0,765325717 | -0,16 | 0,822936218 | -0,24 | 0,744582932 | 0,13  | 0,909550161 |
| Trpv6    | 0,32  | 0,610509826 | -0,05 | 0,932292974 | -0,03 | 0,973341568 | 0,28  | 0,391970556 | 0,3   | 0,645088339 |
| Trrap    | -0,14 | 0,801386084 | -0,22 | 0,636808086 | 0,28  | 0,666834111 | 0,04  | 0,932803079 | -0,71 | 0,105052563 |
| Trub1    | -0,19 | 0,732609982 | -0,4  | 0,568187167 | -0,01 | 0,992239414 | -0,04 | 0,958889858 | -1,05 | 0,234282717 |
| Trub2    | -0,52 | 0,36631183  | 0     | 1           | 0,48  | 0,409427595 | 0,1   | 0,884009965 | 0,04  | 0,965421285 |
| Try10    | -0,06 | 0,945980486 | -0,24 | 0,824927818 | 0     | 0,998479656 | -0,02 | 0,974813898 | -0,33 | 0,630151021 |
| Try4     | 0,54  | 0,376399774 | 0,36  | 0,546455819 | -0,29 | 0,775290551 | -0,21 | 0,607380006 | -0,07 | 0,940092696 |
| Try5     | -0,35 | 0,519823113 | -0,18 | 0,894205636 | 0,35  | 0,492943578 | 0,04  | 0,958492887 | 0,13  | 0,860816928 |
| Tsacc    | 0,01  | 0,993728727 | 0,06  | 0,960094568 | 0,05  | 0,961464515 | -0,82 | 0,213861016 | -0,02 | 0,985982505 |
| Tsc1     | -0,09 | 0,925148331 | -0,02 | 0,992175086 | -0,12 | 0,926974012 | -0,47 | 0,467193994 | -0,36 | 0,600537288 |
| Tsc2     | -0,66 | 0,185196531 | -0,32 | 0,4411787   | 0,39  | 0,545465016 | -0,12 | 0,852024171 | -0,38 | 0,560248704 |
| Tsc22d1  | -0,14 | 0,799359492 | -0,25 | 0,666450149 | -0,38 | 0,608869472 | 0,06  | 0,908916282 | -0,24 | 0,673120647 |
| Tsc22d2  | -0,03 | 0,975179875 | 0,59  | 0,450922219 | -0,11 | 0,936106999 | 0,41  | 0,63172568  | 0,97  | 0,176186731 |
| Tsc22d3  | -0,36 | 0,735041635 | -0,24 | 0,758387553 | -0,36 | 0,624087446 | -1,59 | 0,045997065 | -0,9  | 0,129269376 |
| Tsc22d4  | -0,58 | 0,220541198 | -0,02 | 0,992585488 | 0,27  | 0,830541787 | -0,09 | 0,830129736 | -0,34 | 0,507234235 |
| Tsen15   | 0,01  | 0,989017567 | -0,25 | 0,497312937 | 0,18  | 0,843091338 | 0,03  | 0,959958662 | -0,01 | 0,993785683 |
| Tsen2    | -0,47 | 0,673291416 | -0,29 | 0,664502462 | -0,24 | 0,829543101 | -0,04 | 0,959080508 | -0,57 | 0,329487003 |
| Tsen34   | -0,34 | 0,434971319 | -0,32 | 0,565456041 | 0,63  | 0,351609143 | -0,23 | 0,495340036 | -0,38 | 0,422739533 |
| Tsen54   | -1,03 | 0,222236104 | -0,46 | 0,644516897 | -0,14 | 0,898935616 | 0,19  | 0,903739255 | -0,08 | 0,957620856 |
| Tsfm     | -0,07 | 0,946792769 | -0,15 | 0,77148563  | 0,12  | 0,922318683 | 0,65  | 0,190551808 | 0,35  | 0,702558142 |
| Tsg101   | 0,16  | 0,691651468 | -0,18 | 0,82719852  | 0,46  | 0,30134516  | 0,09  | 0,874607411 | 0,02  | 0,984675109 |
| Tsga10   | -0,01 | 0,990200396 | -0,12 | 0,898238238 | 0,14  | 0,874639384 | -0,81 | 0,313562807 | 0,15  | 0,925858284 |
| Tsga10ip | 0,1   | 0,881760681 | 0,01  | 0,9951682   | 0,13  | 0,819509208 | 0,05  | 0,913974287 | -0,02 | 0,983613958 |
| Tsga13   | -0,34 | 0,520667704 | 0,42  | 0,30567226  | 0,15  | 0,791940256 | -0,27 | 0,601151158 | -0,28 | 0,740020498 |
| Tsga8    | 0,1   | 0,874676538 | -0,2  | 0,622499716 | -0,21 | 0,701508321 | 0,06  | 0,940972589 | 0,01  | 0,991216325 |
| Tshb     | 0,2   | 0,758636946 | 0,23  | 0,555137972 | -0,11 | 0,906097666 | 0,5   | 0,51910611  | -0,04 | 0,97683359  |
| Tshr     | 0,11  | 0,846840544 | -0,16 | 0,845712013 | -0,13 | 0,848462153 | -0,09 | 0,924303497 | -0,24 | 0,80222716  |
| Tshz1    | -0,54 | 0,48807403  | -0,32 | 0,678450473 | 0,11  | 0,893603026 | -0,88 | 0,325923875 | -0,7  | 0,188143555 |
| Tshz2    | 0,45  | 0,464717154 | 0,5   | 0,30567226  | -0,92 | 0,034997504 | 0,13  | 0,793438229 | 0,37  | 0,445839943 |
| Tshz3    | -0,09 | 0,900340189 | 0,13  | 0,77148563  | -0,3  | 0,56948206  | -0,11 | 0,828955037 | -0,21 | 0,74624632  |

|          |       |             |       |             |       |             |       |             |       |             |
|----------|-------|-------------|-------|-------------|-------|-------------|-------|-------------|-------|-------------|
| Tsix     | -0,04 | 0,964124037 | 0     | 0,999546856 | -0,02 | 0,982664533 | -0,07 | 0,899003207 | -0,03 | 0,979392852 |
| Tsks     | 0,09  | 0,928944712 | -0,73 | 0,427990501 | 0,43  | 0,615059269 | 0,43  | 0,597332937 | -0,02 | 0,987680175 |
| Tsku     | -0,08 | 0,909477787 | -0,03 | 0,979002922 | -0,2  | 0,834985569 | 1,23  | 0,032478538 | 0,12  | 0,858561604 |
| Tslp     | -0,26 | 0,807475951 | -0,34 | 0,639167098 | 0,26  | 0,774410417 | 1,93  | 0,008160952 | 0,45  | 0,52829338  |
| Tsn      | -0,14 | 0,741787285 | -0,36 | 0,480740776 | 0,9   | 0,18961333  | 0,43  | 0,263383558 | -0,44 | 0,462558109 |
| Tsnax    | -0,44 | 0,586458491 | -0,53 | 0,526182879 | 0,32  | 0,747599709 | 1,64  | 0,063503394 | 0,26  | 0,796713037 |
| Tsnaxip1 | -0,17 | 0,785268526 | -0,08 | 0,854940418 | 0,04  | 0,961453721 | -0,28 | 0,497511291 | -0,45 | 0,553405078 |
| Tspan1   | 0,08  | 0,904541231 | -0,12 | 0,941609372 | 0,59  | 0,558148937 | -0,5  | 0,45580171  | 0,14  | 0,937446198 |
| Tspan10  | 0,12  | 0,801665973 | 0,24  | 0,824927818 | -0,06 | 0,946893165 | -0,21 | 0,603471344 | 0,33  | 0,623046105 |
| Tspan11  | -0,38 | 0,613990129 | -0,22 | 0,6102591   | -0,24 | 0,668567922 | -0,2  | 0,698921024 | -0,45 | 0,520948388 |
| Tspan12  | -0,55 | 0,581332165 | -0,66 | 0,385935063 | 0,5   | 0,663585217 | -1,03 | 0,032346574 | -0,55 | 0,274394155 |
| Tspan13  | -0,44 | 0,431885822 | 0,33  | 0,42658714  | -0,4  | 0,404120029 | 0,26  | 0,674657338 | -0,33 | 0,641850319 |
| Tspan14  | -0,5  | 0,191492041 | -0,44 | 0,438549879 | 0,26  | 0,647988621 | -0,52 | 0,238763429 | -0,47 | 0,351618597 |
| Tspan15  | -0,09 | 0,889978058 | 0,28  | 0,606605405 | -0,25 | 0,858393835 | -0,13 | 0,814810741 | -0,14 | 0,862867603 |
| Tspan17  | -0,28 | 0,402954668 | -0,28 | 0,645950583 | -0,25 | 0,717856288 | -0,46 | 0,227822618 | -1,1  | 0,020685912 |
| Tspan18  | -1,6  | 0,143037124 | -1,06 | 0,203778449 | 1,09  | 0,142272657 | -0,59 | 0,464949508 | -1,26 | 0,142148848 |
| Tspan2   | -0,98 | 0,38528369  | -0,63 | 0,162295608 | 1,19  | 0,164627016 | 0,33  | 0,428028856 | 0,04  | 0,980945466 |
| Tspan2os | 0,3   | 0,625573018 | 0,02  | 0,9860901   | -0,11 | 0,87734396  | 0,02  | 0,977608888 | 0,06  | 0,942285623 |
| Tspan3   | -0,69 | 0,552800669 | -0,34 | 0,796482292 | 1,34  | 0,089647275 | -1,09 | 0,235630129 | -0,24 | 0,795326093 |
| Tspan31  | -0,12 | 0,761457464 | -0,19 | 0,664765388 | 0,36  | 0,484304973 | 0,16  | 0,689941532 | -0,11 | 0,873940364 |
| Tspan32  | -0,2  | 0,765643907 | -0,05 | 0,957968757 | -0,35 | 0,660517013 | 0,14  | 0,774826947 | 0,06  | 0,940438527 |
| Tspan33  | 0,39  | 0,738983642 | 0,13  | 0,920194416 | 0,3   | 0,704279802 | 0,22  | 0,639812879 | -0,34 | 0,694233384 |
| Tspan4   | 0,76  | 0,15490509  | 0,41  | 0,321992901 | -0,5  | 0,340237423 | -0,09 | 0,875653489 | 0,21  | 0,743880431 |
| Tspan5   | 0,17  | 0,811215544 | 0,02  | 0,986440493 | -0,15 | 0,824306509 | 0,13  | 0,931162893 | 0,28  | 0,839824817 |
| Tspan6   | -0,35 | 0,493024489 | -0,12 | 0,842824184 | 0,3   | 0,683917899 | 3,25  | 0,088655398 | -0,21 | 0,940438527 |
| Tspan7   | -0,27 | 0,526856715 | -0,23 | 0,568282579 | 0,34  | 0,59976087  | 0,51  | 0,425642055 | -0,72 | 0,394403137 |
| Tspan8   | 1,04  | 0,244269955 | 0,48  | 0,508633526 | 0,18  | 0,909963525 | -2,9  | 0,006194852 | 0,22  | 0,765809384 |
| Tspan9   | -0,53 | 0,259269077 | -0,29 | 0,74035876  | 0,26  | 0,807786405 | -0,07 | 0,943143586 | -0,36 | 0,684349871 |
| Tspear   | -0,04 | 0,972720447 | 0,33  | 0,538356106 | -0,02 | 0,987390039 | -0,32 | 0,588987424 | 0     | 0,998045983 |
| Tspo     | 0,27  | 0,510434756 | 0,32  | 0,407898733 | 0,13  | 0,887782273 | 0,16  | 0,773887201 | 0,67  | 0,21050749  |
| Tspo2    | -0,24 | 0,750634506 | 0,23  | 0,649611595 | -0,23 | 0,820823892 | -0,26 | 0,592151809 | -0,45 | 0,608004947 |
| Tspyl1   | -0,22 | 0,578185633 | -0,01 | 0,992017084 | 0,05  | 0,952888594 | -0,21 | 0,705900676 | -0,32 | 0,642845938 |
| Tspyl2   | -0,14 | 0,865776054 | 0,05  | 0,92643313  | 0,01  | 0,992510518 | -0,38 | 0,357477395 | 0,32  | 0,568949282 |
| Tspyl3   | -0,61 | 0,215708749 | -0,01 | 0,984812702 | 0,16  | 0,893858379 | -0,39 | 0,531765246 | -1,1  | 0,107059332 |
| Tspyl4   | -0,25 | 0,714127381 | 0,12  | 0,839789639 | -0,41 | 0,509702247 | -0,07 | 0,921423877 | 0,46  | 0,421404776 |



|         |       |             |       |             |       |             |       |             |       |             |
|---------|-------|-------------|-------|-------------|-------|-------------|-------|-------------|-------|-------------|
| Tspyl5  | 0,01  | 0,990656037 | -0,24 | 0,649104789 | 0,15  | 0,86185852  | 0,01  | 0,986062574 | -0,26 | 0,80155635  |
| Tspy-ps | -0,11 | 0,820023436 | 0,17  | 0,841007084 | 0,08  | 0,908526448 | 0,02  | 0,97878854  | -0,09 | 0,921263496 |
| Tsr1    | -0,2  | 0,892823025 | -0,52 | 0,220316311 | 0,93  | 0,23829372  | 2,44  | 0,007014797 | 0,47  | 0,626544401 |
| Tsr2    | -0,68 | 0,474293292 | 0,7   | 0,505089058 | -0,08 | 0,963775512 | -1,06 | 0,21001567  | 0,15  | 0,90224512  |
| Tsr3    | -0,18 | 0,774076242 | 0,02  | 0,992383215 | 0,39  | 0,425782502 | 0,32  | 0,543829463 | -0,24 | 0,803267274 |
| Tssc1   | 0     | 0,998017023 | -0,13 | 0,867265251 | 0,21  | 0,783326867 | 0,5   | 0,336483286 | -0,07 | 0,948163009 |
| Tssc4   | -0,66 | 0,336229721 | -0,03 | 0,95830747  | 0,55  | 0,225406443 | 0,02  | 0,985897275 | 0,18  | 0,872746019 |
| Tssk1   | 0,16  | 0,788231572 | 0,62  | 0,35381781  | -0,18 | 0,775807039 | 0,05  | 0,928129133 | -0,21 | 0,834322236 |
| Tssk2   | 0,04  | 0,940507691 | 0,05  | 0,922058797 | -0,17 | 0,78984366  | -0,18 | 0,565906862 | -0,01 | 0,987603478 |
| Tssk3   | 0,16  | 0,71064867  | -0,23 | 0,813423328 | -0,02 | 0,989500801 | 0,15  | 0,767425289 | -0,82 | 0,095402351 |
| Tssk4   | -0,24 | 0,808572184 | -0,1  | 0,956934125 | -0,91 | 0,3924048   | -0,05 | 0,955434247 | -0,07 | 0,968130547 |
| Tssk5   | -0,31 | 0,545805455 | 0,05  | 0,967338233 | 0,14  | 0,86459621  | 0,18  | 0,798007688 | 0,22  | 0,77360786  |
| Tssk6   | 0,14  | 0,892124736 | -0,37 | 0,728669599 | -0,19 | 0,893001595 | 0,5   | 0,558052472 | 0,36  | 0,447019099 |
| Tst     | 0,17  | 0,737270162 | -0,13 | 0,873872616 | 0,1   | 0,897932497 | 0,09  | 0,912858228 | 0,17  | 0,864801064 |
| Tsta3   | -0,24 | 0,704720946 | -0,39 | 0,456109017 | 0,5   | 0,343526576 | 0,71  | 0,146332437 | -0,19 | 0,799638391 |
| Tstd1   | 0,66  | 0,27832114  | 0,87  | 0,370517584 | 0,28  | 0,857690649 | -0,75 | 0,398422441 | 0,57  | 0,587011728 |
| Tstd2   | -0,65 | 0,189684245 | 0,5   | 0,758596097 | 0,55  | 0,492721892 | -0,14 | 0,830978499 | -0,05 | 0,958856121 |
| Tstd3   | -0,62 | 0,32082549  | -0,32 | 0,812664394 | -0,31 | 0,566099777 | 0,66  | 0,623649597 | -0,77 | 0,437194199 |
| Tsx     | 0,14  | 0,9230183   | 0,52  | 0,673542391 | 0,05  | 0,967154353 | -0,13 | 0,927265002 | 0,16  | 0,912733818 |
| Ttbk1   | -0,21 | 0,685823963 | 0,05  | 0,937432848 | 0,09  | 0,917672398 | -0,29 | 0,493485636 | -0,39 | 0,525387388 |
| Ttbk2   | 0,03  | 0,978853388 | 0,05  | 0,956935029 | 0,33  | 0,816081776 | -0,61 | 0,175411914 | -0,09 | 0,931519966 |
| Ttc1    | 0,02  | 0,984964779 | -0,05 | 0,941258271 | 0,2   | 0,813866345 | 0,14  | 0,738406742 | 0,41  | 0,403140132 |
| Ttc12   | -0,12 | 0,903817676 | -0,17 | 0,871370631 | -0,02 | 0,990836784 | 0,35  | 0,527078672 | -0,16 | 0,86493772  |
| Ttc13   | -0,84 | 0,185970906 | -0,25 | 0,671302172 | -0,02 | 0,990836784 | 1,59  | 0,035434214 | 0,07  | 0,952520836 |
| Ttc14   | -0,07 | 0,959458865 | 0,22  | 0,815416975 | -0,28 | 0,498736751 | -0,14 | 0,802221833 | -0,24 | 0,763321251 |
| Ttc16   | 0,52  | 0,543570731 | 0,15  | 0,866844066 | -0,56 | 0,421739243 | -0,35 | 0,535895689 | -0,19 | 0,820234867 |
| Ttc17   | -0,07 | 0,963914207 | 0,26  | 0,641804702 | 0,29  | 0,534543192 | -0,46 | 0,254784646 | -0,36 | 0,571626211 |
| Ttc19   | -0,19 | 0,666546952 | 0,23  | 0,722938629 | -0,21 | 0,829285065 | -0,12 | 0,851877307 | -0,37 | 0,646672171 |
| Ttc21a  | -0,07 | 0,957427783 | -0,27 | 0,604914697 | -0,23 | 0,846458227 | 0,36  | 0,461501892 | -0,24 | 0,823098095 |
| Ttc21b  | -0,32 | 0,784951771 | 0,43  | 0,703291096 | 0,53  | 0,545431283 | -0,62 | 0,449420775 | -0,15 | 0,914459636 |
| Ttc22   | 0,05  | 0,940936429 | 0,02  | 0,992585488 | 0,08  | 0,940550094 | 0,22  | 0,799696249 | 0,59  | 0,390391798 |
| Ttc23   | -0,35 | 0,637135317 | 0,29  | 0,57266322  | 0,72  | 0,26839941  | 0,43  | 0,337568585 | -0,46 | 0,611234576 |
| Ttc23l  | 0,12  | 0,939308558 | 0,37  | 0,88632917  | -0,1  | 0,876684089 | 0,1   | 0,959921588 | -0,38 | 0,655912577 |
| Ttc24   | -0,02 | 0,982842179 | -0,17 | 0,892716986 | 0     | 0,99879674  | 0,41  | 0,263246878 | 0,63  | 0,193796626 |
| Ttc25   | 0,22  | 0,735860437 | 0,13  | 0,906678859 | -0,38 | 0,424320252 | -0,2  | 0,839333217 | 0,03  | 0,979456872 |

|           |       |             |       |             |       |             |       |             |       |             |
|-----------|-------|-------------|-------|-------------|-------|-------------|-------|-------------|-------|-------------|
| Ttc26     | -0,01 | 0,994104887 | 0,64  | 0,251811923 | 0,9   | 0,172712848 | 0,53  | 0,698459607 | -0,79 | 0,593599703 |
| Ttc27     | -1,2  | 0,211427717 | 0,16  | 0,782652703 | 1,23  | 0,239963458 | 0,78  | 0,588844463 | -0,19 | 0,949544475 |
| Ttc28     | -0,52 | 0,414026998 | -0,65 | 0,156759607 | 0,72  | 0,402220741 | -0,55 | 0,130690458 | -1,09 | 0,026772305 |
| Ttc29     | -0,12 | 0,88956316  | 0,08  | 0,944172549 | 0,15  | 0,830300038 | 0,23  | 0,654016303 | 0,39  | 0,514266435 |
| Ttc3      | 0,03  | 0,964154899 | 0,2   | 0,71637181  | 0,19  | 0,760721308 | -0,59 | 0,152279687 | -0,05 | 0,952971656 |
| Ttc30a1   | 0,12  | 0,863048221 | 0,37  | 0,761560013 | -0,01 | 0,997581017 | -0,35 | 0,758261026 | -0,63 | 0,59705803  |
| Ttc30a2   | -0,22 | 0,67806773  | 0,43  | 0,518546531 | 0,16  | 0,878810468 | -0,5  | 0,437635562 | -0,11 | 0,939948423 |
| Ttc30b    | -0,29 | 0,662416763 | 0,3   | 0,706671369 | -0,43 | 0,374422909 | -0,34 | 0,722849444 | -0,4  | 0,677687906 |
| Ttc32     | -0,01 | 0,991919022 | -0,29 | 0,754578715 | 0,21  | 0,858016859 | -0,23 | 0,749554449 | 0,15  | 0,844105751 |
| Ttc33     | 0,22  | 0,775122619 | 0,09  | 0,93163271  | -0,12 | 0,896164273 | 0,19  | 0,894462471 | 0,27  | 0,735152891 |
| Ttc34     | 0,16  | 0,830575431 | 0,13  | 0,872939051 | -0,1  | 0,911921787 | -0,19 | 0,649999605 | 0,03  | 0,982175252 |
| Ttc36     | 0,38  | 0,5082537   | 0,17  | 0,874195024 | -0,07 | 0,948637233 | -0,43 | 0,400664527 | -0,25 | 0,749854941 |
| Ttc37     | -0,98 | 0,116800904 | 0,22  | 0,879693148 | 0,97  | 0,180063257 | 0,13  | 0,911182257 | -0,16 | 0,831923128 |
| Ttc38     | -0,08 | 0,94881239  | 0,19  | 0,789051952 | -0,23 | 0,819509208 | -0,14 | 0,900529161 | -1,11 | 0,159047845 |
| Ttc39a    | -0,38 | 0,378598836 | 0,1   | 0,872288225 | 0,99  | 0,154586266 | -0,08 | 0,9130534   | -0,29 | 0,703332663 |
| Ttc39aos1 | -0,07 | 0,950532575 | -0,69 | 0,375026056 | 0,22  | 0,77115153  | 0,72  | 0,216001644 | 0,01  | 0,990633766 |
| Ttc39b    | 1,38  | 0,054075482 | 0,92  | 0,149425967 | -2,09 | 0,006274682 | 1,61  | 0,021980565 | 2,3   | 0,005499662 |
| Ttc39c    | -0,32 | 0,630710347 | 0,79  | 0,450538273 | 0,54  | 0,56948206  | -1,22 | 0,155837102 | 0,13  | 0,922921816 |
| Ttc39d    | 0     | 0,996998625 | -0,08 | 0,880892852 | 0,07  | 0,928085218 | 0,2   | 0,611632616 | 0,16  | 0,800540569 |
| Ttc4      | -0,16 | 0,780091784 | -0,02 | 0,981394744 | 0,38  | 0,566351122 | -0,25 | 0,703281567 | -0,5  | 0,513517573 |
| Ttc41     | 0,2   | 0,660432795 | 0,37  | 0,73274163  | -0,09 | 0,881461218 | -0,13 | 0,87613802  | 0,31  | 0,653551273 |
| Ttc5      | 0,19  | 0,776839834 | 0,06  | 0,956441911 | 0,17  | 0,856416051 | -0,05 | 0,950433921 | 0,19  | 0,859663155 |
| Ttc6      | 0,53  | 0,36631183  | 0,37  | 0,612662008 | -0,21 | 0,813180174 | 0,23  | 0,778817721 | 0,17  | 0,885872093 |
| Ttc7      | 0,1   | 0,877312739 | -0,09 | 0,861905894 | -0,11 | 0,908709142 | -0,17 | 0,820745707 | -0,3  | 0,765809384 |
| Ttc7b     | -0,15 | 0,786186141 | -0,18 | 0,824372931 | 0,14  | 0,899136251 | 0,55  | 0,121460273 | -0,05 | 0,953971867 |
| Ttc8      | -0,65 | 0,32982243  | -0,18 | 0,900801202 | 0,46  | 0,598179126 | 0,51  | 0,397950785 | 0,09  | 0,943113747 |
| Ttc9      | 0,12  | 0,822107047 | 0,1   | 0,895853001 | 0,06  | 0,96186488  | 2,57  | 0,010727294 | -0,26 | 0,816731898 |
| Ttc9b     | -0,42 | 0,370332344 | -0,15 | 0,850001559 | -0,1  | 0,911506558 | 0,26  | 0,675526343 | 0,03  | 0,979392852 |
| Ttc9c     | 0,28  | 0,64776317  | 0,25  | 0,804576975 | 0,67  | 0,30134516  | -0,08 | 0,883339799 | 0,08  | 0,939127163 |
| Ttf1      | -0,27 | 0,529626842 | -0,22 | 0,8515863   | 0,39  | 0,571405665 | -0,3  | 0,480111634 | -0,21 | 0,876719251 |
| Ttf2      | -1,19 | 0,090466364 | -0,29 | 0,765325717 | 0,45  | 0,72316448  | 0,32  | 0,704106328 | -1,42 | 0,032750472 |
| Tti1      | -0,45 | 0,518833456 | -0,35 | 0,591305258 | 0,3   | 0,768817142 | 0,26  | 0,496826555 | -0,52 | 0,643382128 |
| Tti2      | 0,12  | 0,862322913 | 0,02  | 0,981441793 | 0,76  | 0,265181245 | -0,04 | 0,929835301 | -0,01 | 0,99316648  |
| Ttk       | -1,42 | 0,175572914 | -0,88 | 0,532539731 | 0,46  | 0,654402247 | 1,98  | 0,024096    | -0,76 | 0,167270572 |
| Ttl       | -0,51 | 0,546019769 | 0,31  | 0,796482292 | 0,9   | 0,169619185 | -0,66 | 0,27906148  | -0,31 | 0,609598467 |

|            |       |             |       |             |       |             |       |             |       |             |
|------------|-------|-------------|-------|-------------|-------|-------------|-------|-------------|-------|-------------|
| Ttll1      | -0,11 | 0,892124736 | -0,06 | 0,95021587  | -0,05 | 0,959437564 | 1,05  | 0,310590719 | -0,1  | 0,956585095 |
| Ttll10     | 0,16  | 0,738581634 | -0,12 | 0,872187376 | -0,12 | 0,849342965 | 0,17  | 0,720743596 | -0,05 | 0,958259949 |
| Ttll11     | 0,12  | 0,829299665 | 0,11  | 0,940507154 | -0,29 | 0,488069118 | 0,15  | 0,814810741 | 0,13  | 0,912733818 |
| Ttll12     | -0,56 | 0,247582979 | -0,93 | 0,150681594 | 0,91  | 0,149785118 | 1,68  | 0,07770141  | -0,95 | 0,245859871 |
| Ttll13     | -0,27 | 0,697992827 | 0,29  | 0,553252496 | -0,42 | 0,370128951 | -0,11 | 0,793095699 | 0,33  | 0,623046105 |
| Ttll2      | 0,05  | 0,952755551 | -0,13 | 0,892716986 | -0,1  | 0,910060392 | 0,17  | 0,724510943 | 0,37  | 0,550083777 |
| Ttll3      | 1,08  | 0,074890017 | 0,77  | 0,507925771 | 0,11  | 0,926365431 | -0,1  | 0,931425028 | -0,34 | 0,495065595 |
| Ttll4      | -0,09 | 0,928396151 | 0,04  | 0,966078321 | 0,03  | 0,983094261 | 0,6   | 0,315848249 | 0,31  | 0,65140403  |
| Ttll5      | -0,15 | 0,902442039 | -0,4  | 0,569814824 | 1,18  | 0,224586767 | 0,09  | 0,932633294 | -0,2  | 0,845218636 |
| Ttll6      | 0,07  | 0,943079514 | 0,03  | 0,969019461 | 0,1   | 0,878636183 | -0,12 | 0,793351209 | -0,01 | 0,991437885 |
| Ttll7      | -0,48 | 0,2488289   | -0,73 | 0,490814009 | 0,83  | 0,206505714 | -0,88 | 0,283477648 | -0,15 | 0,913553402 |
| Ttll8      | 0,02  | 0,983563266 | 0,09  | 0,867324954 | -0,01 | 0,993379272 | 0,16  | 0,791535825 | 0,03  | 0,980945466 |
| Ttll9      | -0,03 | 0,966250856 | 0,04  | 0,961370411 | -0,34 | 0,595395621 | -0,16 | 0,6786069   | 0,12  | 0,862456985 |
| Ttn        | 0,15  | 0,701297763 | -0,18 | 0,661976216 | 0,08  | 0,913177179 | 0,04  | 0,931477012 | 0,02  | 0,981452448 |
| Ttpa       | 0,03  | 0,972458819 | -0,39 | 0,635553733 | 0,22  | 0,816374369 | -0,07 | 0,959566803 | 0,13  | 0,952296554 |
| Ttpal      | -0,51 | 0,491531635 | -0,08 | 0,924384966 | -0,15 | 0,851323838 | -0,4  | 0,357261043 | -0,03 | 0,974553568 |
| Ttr        | -0,01 | 0,995973965 | 0,13  | 0,797098822 | 0,17  | 0,812157641 | -0,13 | 0,812549062 | -0,15 | 0,861218943 |
| Ttyh1      | 0,89  | 0,124654295 | 0,99  | 0,435223036 | -1,19 | 0,321761132 | -0,45 | 0,654540934 | 0,03  | 0,980961333 |
| Ttyh2      | -1,6  | 0,148685247 | -1,07 | 0,16219325  | 0,46  | 0,647072042 | 2,07  | 0,04232117  | -0,78 | 0,316401979 |
| Ttyh3      | -0,46 | 0,241021853 | -0,45 | 0,589733014 | 0,57  | 0,340237423 | -0,09 | 0,896599656 | -0,93 | 0,119306657 |
| Tub        | -0,05 | 0,949362206 | -0,36 | 0,45420995  | 0,47  | 0,209005345 | 0,14  | 0,82281663  | -0,56 | 0,376051367 |
| Tuba1a     | -0,43 | 0,495249753 | -0,46 | 0,30567226  | 0,7   | 0,54367169  | 0,83  | 0,179236207 | -0,3  | 0,677222415 |
| Tuba1b     | -0,58 | 0,189736931 | -0,98 | 0,087435995 | 0,45  | 0,517995686 | 0,12  | 0,77073646  | 0,06  | 0,948163009 |
| Tuba1c     | 0,03  | 0,962660554 | -0,07 | 0,916496897 | 0,3   | 0,538676107 | 0,34  | 0,256514519 | 0,03  | 0,969720149 |
| Tuba3a     | 0,05  | 0,939788769 | -0,25 | 0,690202315 | -0,19 | 0,737241227 | 0,31  | 0,454995407 | -0,15 | 0,823098095 |
| Tuba4a     | -0,04 | 0,96177183  | 0,05  | 0,966717367 | 1,27  | 0,068894819 | -1,88 | 0,06195481  | 0,36  | 0,706246121 |
| Tuba8      | -0,07 | 0,898572877 | 0,03  | 0,946885634 | 0,41  | 0,450605545 | 0,17  | 0,664276008 | 0,51  | 0,354221316 |
| Tubal3     | -0,21 | 0,721484809 | 0,42  | 0,517288934 | -0,19 | 0,856046789 | 0,37  | 0,677089514 | -0,23 | 0,817563348 |
| Tubb1      | 0,47  | 0,59710379  | 0,06  | 0,952427593 | 0,8   | 0,280958182 | 1,15  | 0,195886404 | -0,02 | 0,988334908 |
| Tubb2a     | -0,34 | 0,311022075 | -0,26 | 0,514781187 | 0,28  | 0,638066726 | 0,06  | 0,893022174 | 0,42  | 0,350160338 |
| Tubb2a-ps2 | 0,09  | 0,844251633 | 0,13  | 0,786394409 | -0,05 | 0,936053792 | 0,03  | 0,959921588 | 0,1   | 0,875421436 |
| Tubb2b     | -0,03 | 0,963378584 | -0,02 | 0,985291538 | 0,44  | 0,506787649 | 0,95  | 0,106129389 | 0,22  | 0,779920985 |
| Tubb3      | 1,38  | 0,181672845 | 0,79  | 0,195016179 | -1,27 | 0,144099096 | 3,81  | 0,007965753 | 2,51  | 0,005561774 |
| Tubb4a     | -0,32 | 0,758136438 | 0,46  | 0,67087404  | -0,02 | 0,986912078 | -0,31 | 0,634807339 | -0,06 | 0,961406182 |
| Tubb4b     | -0,29 | 0,665901437 | -0,3  | 0,646693191 | 0,45  | 0,660567041 | -0,42 | 0,280446361 | 0,44  | 0,334365666 |

|          |       |             |       |             |       |             |       |             |       |             |
|----------|-------|-------------|-------|-------------|-------|-------------|-------|-------------|-------|-------------|
| Tubb5    | -0,32 | 0,471980619 | -0,5  | 0,229666828 | 0,71  | 0,108206799 | 0,93  | 0,05133893  | -0,21 | 0,771954227 |
| Tubb6    | -0,15 | 0,704720946 | -0,13 | 0,7887747   | 0,25  | 0,650169259 | 2,01  | 0,010315712 | -0,35 | 0,494227984 |
| Tubd1    | -1,08 | 0,189644465 | -0,22 | 0,683938974 | -0,29 | 0,8191559   | -0,69 | 0,303816416 | -0,51 | 0,682944949 |
| Tube1    | 0,46  | 0,279793863 | -0,56 | 0,790939978 | 0,33  | 0,706842882 | 0,41  | 0,640025224 | -0,34 | 0,682714738 |
| Tubg1    | -0,54 | 0,29523865  | -0,85 | 0,087315688 | 0,08  | 0,947460329 | 0,74  | 0,276093686 | -0,04 | 0,97425848  |
| Tubg2    | -0,68 | 0,687662951 | -0,41 | 0,624292684 | -0,71 | 0,642400849 | 0,83  | 0,162931969 | -1,11 | 0,328922692 |
| Tubgcp2  | -0,22 | 0,74672311  | -0,18 | 0,823246376 | 0,41  | 0,404341148 | -0,04 | 0,931392535 | 0     | 0,999595686 |
| Tubgcp3  | 0,07  | 0,914090929 | 0,23  | 0,72665096  | 0,07  | 0,938864861 | -0,56 | 0,160390801 | -0,13 | 0,861056054 |
| Tubgcp4  | 0,1   | 0,843029805 | -0,14 | 0,886124811 | 0,08  | 0,923350407 | 0,01  | 0,994271059 | -0,26 | 0,616091772 |
| Tubgcp5  | -1,14 | 0,132779189 | -0,17 | 0,781665479 | 1,08  | 0,036231726 | -0,56 | 0,63061082  | 0,01  | 0,994774512 |
| Tubgcp6  | -0,03 | 0,973117883 | -0,29 | 0,666450149 | 0,14  | 0,815942732 | -0,3  | 0,571108168 | -0,59 | 0,376217331 |
| Tufm     | -0,21 | 0,657723995 | -0,11 | 0,804868131 | 0,19  | 0,773365699 | 0,27  | 0,384319247 | -0,27 | 0,608072805 |
| Tuft1    | -0,07 | 0,963378584 | 0,66  | 0,328485456 | 0,78  | 0,215429632 | -0,26 | 0,756436475 | 0,46  | 0,583279373 |
| Tug1     | 0,06  | 0,948926586 | 0,19  | 0,645775005 | 0,37  | 0,684002106 | -0,21 | 0,524105498 | 0,12  | 0,871939686 |
| Tulp1    | 0,41  | 0,523556522 | 0,21  | 0,688641724 | -0,4  | 0,613380041 | -0,28 | 0,555470395 | -0,39 | 0,620866926 |
| Tulp2    | 0,34  | 0,393169325 | 0,18  | 0,723989536 | 0,03  | 0,973732268 | 0,04  | 0,955119589 | -0,11 | 0,902540251 |
| Tulp3    | -0,1  | 0,9124306   | 0,34  | 0,621731873 | 0,25  | 0,652071699 | -0,07 | 0,911253055 | -0,27 | 0,662758219 |
| Tulp4    | 0,1   | 0,865613265 | -0,08 | 0,868234125 | 0,12  | 0,947460329 | -0,66 | 0,068934318 | -0,14 | 0,881943508 |
| Tunar    | 0,09  | 0,922118639 | -0,3  | 0,418279074 | 0,06  | 0,941063967 | -0,04 | 0,954285053 | 0,1   | 0,904040121 |
| Tusc1    | 0,06  | 0,933743025 | 0,03  | 0,951534789 | -0,01 | 0,996260936 | -0,07 | 0,902632056 | -0,12 | 0,881135847 |
| Tusc2    | -0,05 | 0,963914207 | 0,51  | 0,250869803 | 0,2   | 0,708852886 | -0,19 | 0,812468015 | 0,06  | 0,949032619 |
| Tusc3    | -0,13 | 0,813824216 | -0,25 | 0,569532701 | 0,88  | 0,091628027 | -0,24 | 0,513394174 | -0,6  | 0,193796626 |
| Tusc5    | -0,21 | 0,921652597 | -0,48 | 0,436251163 | 0,22  | 0,804576742 | -1,81 | 0,011121575 | -0,87 | 0,196710506 |
| Tut1     | -0,06 | 0,964502812 | 0,08  | 0,942729248 | -0,49 | 0,525871472 | 0,21  | 0,55808558  | 0,37  | 0,598284204 |
| Tvp23a   | 0,67  | 0,754029145 | 0,98  | 0,219431116 | 0,23  | 0,912268947 | 1,22  | 0,046243188 | 0,49  | 0,565817768 |
| Tvp23b   | 0,38  | 0,645187928 | -0,07 | 0,926157704 | 0,57  | 0,507988847 | -0,34 | 0,554731173 | -0,06 | 0,953297732 |
| Tvp23bos | 0,1   | 0,892848629 | 0,01  | 0,992383215 | -0,06 | 0,963199274 | 0,55  | 0,389492505 | 0,6   | 0,368554903 |
| Twf1     | -0,25 | 0,666405577 | -0,17 | 0,674832256 | 0,5   | 0,342915451 | 0,36  | 0,320980074 | -0,68 | 0,37287699  |
| Twf2     | -0,24 | 0,695932247 | -0,07 | 0,912535732 | 0,2   | 0,702448924 | -0,2  | 0,671346789 | -0,49 | 0,493455429 |
| Twist1   | 0,14  | 0,893492748 | 1,04  | 0,585138173 | 0,05  | 0,96043738  | -0,6  | 0,774779055 | 0,68  | 0,629382922 |
| Twist2   | 0,34  | 0,630133896 | 0,27  | 0,732847182 | -0,18 | 0,777138187 | -0,09 | 0,818485589 | 0,03  | 0,978993162 |
| Twistnb  | -0,5  | 0,446515613 | 0,16  | 0,781665479 | 0,1   | 0,903942509 | 0,51  | 0,293520924 | 0,44  | 0,499998316 |
| Twsg1    | 0,7   | 0,12351475  | 0,59  | 0,297762088 | -0,14 | 0,80210446  | 0,13  | 0,892186579 | 0,31  | 0,834332046 |
| Txk      | 0,94  | 0,336358735 | 0,74  | 0,318798133 | -0,5  | 0,543291636 | -0,32 | 0,442066053 | 0,32  | 0,77360786  |
| Txlna    | -0,57 | 0,318333634 | 0,05  | 0,94603362  | 0,38  | 0,584507923 | 0,31  | 0,432409505 | 0,38  | 0,543479168 |

|         |       |             |       |             |       |             |       |             |       |             |
|---------|-------|-------------|-------|-------------|-------|-------------|-------|-------------|-------|-------------|
| Txlnb   | 0,25  | 0,721486597 | 0,05  | 0,966717367 | -0,11 | 0,941627748 | -1,44 | 0,009018221 | -0,24 | 0,796365991 |
| Txlng   | 0,29  | 0,683299822 | -0,07 | 0,915784454 | -0,21 | 0,81820534  | 0,26  | 0,450383855 | 0,26  | 0,677222415 |
| Txn1    | 0,53  | 0,247254947 | -0,02 | 0,977697653 | -0,3  | 0,755588608 | 0,62  | 0,089273257 | 0,75  | 0,088382056 |
| Txn2    | -0,01 | 0,989017567 | -0,17 | 0,850001559 | 0,05  | 0,965775869 | 0,52  | 0,381974077 | -0,21 | 0,796146369 |
| Txndc11 | -0,43 | 0,572825051 | -0,55 | 0,526182879 | 0,24  | 0,736310979 | 0,6   | 0,177747639 | -0,27 | 0,697818445 |
| Txndc12 | 0,05  | 0,94881239  | -0,2  | 0,595984402 | 0,45  | 0,530587266 | 0,39  | 0,215252719 | -0,59 | 0,215020606 |
| Txndc15 | -0,32 | 0,754095492 | 0,03  | 0,977463004 | -0,14 | 0,882540073 | -0,02 | 0,981706816 | 0,07  | 0,934242963 |
| Txndc16 | -0,12 | 0,894248924 | 0,42  | 0,553056965 | 0,43  | 0,51127708  | -1,13 | 0,045809254 | -0,93 | 0,23784438  |
| Txndc17 | 0,24  | 0,545635346 | -0,01 | 0,990380046 | -0,32 | 0,591205604 | 0,66  | 0,1122689   | 0,54  | 0,271713687 |
| Txndc2  | 0,54  | 0,38838066  | -0,17 | 0,87566343  | 0,26  | 0,635864143 | 0,16  | 0,767937787 | 0,15  | 0,823098095 |
| Txndc5  | -0,18 | 0,718038014 | -0,52 | 0,242981491 | 0,27  | 0,648315091 | 1,4   | 0,016293976 | -0,4  | 0,496693032 |
| Txndc8  | 0,27  | 0,632053719 | 0,07  | 0,934294134 | -0,25 | 0,770526999 | -0,1  | 0,938387989 | -0,02 | 0,990091016 |
| Txndc9  | 0,21  | 0,855264133 | 0,11  | 0,945978501 | -0,39 | 0,727874974 | -0,52 | 0,39058196  | 0,22  | 0,876188515 |
| Txnip   | 0,54  | 0,172698611 | 0,83  | 0,235116318 | -0,74 | 0,180209764 | -1,96 | 0,005310772 | -0,17 | 0,762656141 |
| TxnI1   | -0,06 | 0,898116888 | -0,17 | 0,676123799 | 0,19  | 0,711135497 | 0,3   | 0,338716513 | -0,16 | 0,794840052 |
| TxnI4a  | -0,16 | 0,748619201 | -0,07 | 0,90164068  | 0,49  | 0,250186067 | 0,38  | 0,254786075 | 0,15  | 0,844265172 |
| TxnI4b  | 0,19  | 0,833275012 | 0,34  | 0,392515169 | 0,66  | 0,402779579 | 1,35  | 0,045034122 | -0,14 | 0,932742551 |
| Txnrd1  | -0,06 | 0,933253663 | -0,06 | 0,929604416 | -0,3  | 0,684455958 | 1,16  | 0,090753756 | 0,5   | 0,462232367 |
| Txnrd2  | -0,43 | 0,407591936 | -0,7  | 0,317755212 | 0,13  | 0,844258774 | 0,68  | 0,149359147 | -0,13 | 0,880134862 |
| Txnrd3  | 0,72  | 0,527354429 | -0,6  | 0,470335388 | 0,5   | 0,545465016 | -0,2  | 0,920339234 | 0,79  | 0,598234808 |
| Tyk2    | -0,33 | 0,580909375 | -0,02 | 0,985764487 | -0,1  | 0,911634383 | -0,07 | 0,902841605 | -0,18 | 0,799803346 |
| Tymp    | 0,22  | 0,729638783 | -0,53 | 0,539700767 | 0,13  | 0,938313208 | -0,3  | 0,581595063 | -0,45 | 0,443096537 |
| Tyms    | -0,74 | 0,421029929 | -0,06 | 0,977204386 | 0,44  | 0,786634846 | 0,47  | 0,664161531 | 0,65  | 0,713710128 |
| Tyr     | -0,03 | 0,964358894 | 0,08  | 0,918167746 | 0     | 0,998479176 | 0     | 0,998710655 | 0,25  | 0,792346596 |
| Tyro3   | -0,39 | 0,602404073 | -0,3  | 0,741531154 | 0,29  | 0,750624323 | -0,06 | 0,900277174 | -0,33 | 0,549951038 |
| Tyrobp  | -0,3  | 0,622541886 | -0,42 | 0,501917143 | 0,25  | 0,910151906 | 0,52  | 0,21617485  | -0,77 | 0,091661588 |
| Tyrp1   | 0,3   | 0,498030624 | -0,45 | 0,561842393 | 0,35  | 0,72902724  | 0,34  | 0,406187448 | -0,09 | 0,933173742 |
| Tysnd1  | -0,27 | 0,557114011 | -0,43 | 0,389996405 | 0,89  | 0,091301999 | 0,41  | 0,250595614 | -0,1  | 0,879308929 |
| Tyw1    | -0,47 | 0,380793004 | -0,01 | 0,996259587 | 0,46  | 0,448189249 | 0,06  | 0,951229436 | -0,24 | 0,801087157 |
| Tyw3    | -0,04 | 0,983663467 | -0,14 | 0,804394095 | 0,1   | 0,887630371 | 0,21  | 0,845767749 | -0,29 | 0,805875294 |
| Tyw5    | -0,43 | 0,59130483  | -0,13 | 0,884325686 | 0,4   | 0,598378377 | 0,61  | 0,079157342 | 0,02  | 0,985269236 |
| U2af1   | -0,04 | 0,979827119 | -0,26 | 0,614530823 | 0,15  | 0,885556448 | 0,55  | 0,476284901 | 0,32  | 0,735152891 |
| U2af1I4 | 0,09  | 0,893137556 | -0,11 | 0,858860016 | 0,04  | 0,969928932 | -0,38 | 0,313115535 | -0,47 | 0,373929884 |
| U2af2   | -0,5  | 0,421029929 | -0,45 | 0,406817158 | 0,39  | 0,672490033 | 0,14  | 0,858632076 | 0,01  | 0,995682364 |
| U2surp  | 0     | 0,998769353 | 0,08  | 0,924525687 | 0,32  | 0,596163134 | 0,13  | 0,770328731 | 0,57  | 0,292707282 |

|          |       |             |       |             |       |             |       |             |       |             |
|----------|-------|-------------|-------|-------------|-------|-------------|-------|-------------|-------|-------------|
| U90926   | 0,04  | 0,968252417 | 0,12  | 0,958856577 | -0,04 | 0,957856253 | -1,06 | 0,477859088 | 2,95  | 0,038285087 |
| Uaca     | 0,03  | 0,974144325 | 0,58  | 0,353692234 | -0,62 | 0,381097038 | 0,57  | 0,22686003  | 0,42  | 0,487064794 |
| Uap1     | 0,16  | 0,840882072 | 0,15  | 0,823564094 | 1,3   | 0,13589176  | -0,92 | 0,170192348 | 0,03  | 0,978974612 |
| Uap111   | -0,02 | 0,98077643  | 0,35  | 0,61193546  | -0,18 | 0,772397144 | -0,43 | 0,239956061 | -0,04 | 0,961448496 |
| Uba1     | -0,19 | 0,604403643 | -0,09 | 0,862088357 | 0,36  | 0,520548688 | 0,52  | 0,150931608 | 0,22  | 0,69839069  |
| Uba1y    | 0,23  | 0,727858536 | 0,23  | 0,817904541 | -0,14 | 0,899387868 | -0,08 | 0,947809027 | 0,22  | 0,885318142 |
| Uba2     | -0,71 | 0,260634235 | 0,01  | 0,992017084 | 0,25  | 0,714893141 | -0,25 | 0,817984254 | -0,32 | 0,766559546 |
| Uba3     | -0,12 | 0,801665973 | -0,29 | 0,625875078 | 0,03  | 0,982664533 | 0,82  | 0,139056058 | 0,58  | 0,375162254 |
| Uba5     | 0     | 0,998027251 | 0,07  | 0,936333402 | 0,16  | 0,865145801 | 0,38  | 0,325265273 | -0,08 | 0,915587326 |
| Uba52    | 0,08  | 0,84900712  | -0,04 | 0,934294134 | 0,14  | 0,767822182 | 0,26  | 0,396250826 | -0,12 | 0,841522773 |
| Uba6     | -0,16 | 0,871717973 | 0,51  | 0,365256482 | 0,53  | 0,56948206  | 1,01  | 0,378525142 | 0,81  | 0,562836808 |
| Uba7     | 0,68  | 0,265900491 | 0,72  | 0,158696948 | -1,75 | 0,002978188 | 0,09  | 0,828955037 | 1,25  | 0,016135768 |
| Ubac1    | -0,22 | 0,783200207 | -0,56 | 0,477855502 | 0,43  | 0,593455611 | 0,46  | 0,69938772  | 0,18  | 0,907715372 |
| Ubac2    | -0,32 | 0,522710796 | -0,1  | 0,919934184 | -0,6  | 0,305273726 | 0,34  | 0,310873282 | -0,17 | 0,792889876 |
| Ubald1   | -0,2  | 0,718996404 | -0,11 | 0,89081665  | 0,42  | 0,36193667  | 0,81  | 0,055569548 | -0,36 | 0,619958052 |
| Ubald2   | 0,13  | 0,782411329 | -0,09 | 0,864363741 | 0,05  | 0,962519999 | 0,44  | 0,240123494 | -0,02 | 0,981913783 |
| Udap1    | 0,45  | 0,238140392 | 0,23  | 0,641792237 | -0,26 | 0,53777995  | -0,18 | 0,707298546 | -0,2  | 0,799495162 |
| Udap11   | 0,47  | 0,525216441 | 1,08  | 0,530742692 | 0,04  | 0,982305856 | -0,46 | 0,744893532 | 0,28  | 0,911813187 |
| Udap2    | -0,42 | 0,36631183  | -0,5  | 0,245917773 | 0,45  | 0,47804917  | 1,06  | 0,027552613 | -0,06 | 0,939930189 |
| Udap21   | -0,34 | 0,396167292 | -0,36 | 0,436251163 | -0,06 | 0,953951069 | 0,25  | 0,561974208 | -0,33 | 0,560964387 |
| Ubash3a  | -0,09 | 0,885622132 | -0,08 | 0,894400782 | -0,46 | 0,433353965 | 0,07  | 0,901395825 | -0,03 | 0,972615084 |
| Ubash3b  | 0,28  | 0,537134376 | -0,07 | 0,954105319 | -0,05 | 0,972847253 | 0,58  | 0,501637928 | 0,01  | 0,992980215 |
| Ubc      | 0,52  | 0,318041432 | 0,43  | 0,899110485 | -1,11 | 0,359184145 | -0,73 | 0,527184341 | 0,22  | 0,7446186   |
| Ubd      | 1,59  | 0,175830295 | 0,83  | 0,200674509 | -3,48 | 0,000783118 | 5,58  | 0,005310772 | 3,43  | 0,006269121 |
| Ube2a    | -0,13 | 0,9231839   | 0,33  | 0,49761736  | 0,89  | 0,267693111 | -0,28 | 0,737710335 | 0,29  | 0,815685084 |
| Ube2b    | 0,1   | 0,882060783 | 0,04  | 0,945193428 | 0,22  | 0,777417583 | 0,24  | 0,549014569 | 0,09  | 0,902802615 |
| Ube2c    | -0,54 | 0,617280733 | -0,93 | 0,288456022 | 1,16  | 0,215987004 | 3,2   | 0,106117449 | -0,74 | 0,647278902 |
| Ube2cbp  | -0,34 | 0,78851504  | 0,83  | 0,402975324 | -0,65 | 0,548288344 | -0,41 | 0,660090125 | 0,43  | 0,710368081 |
| Ube2d1   | 0,22  | 0,602160482 | -0,28 | 0,589281517 | 0,03  | 0,973046409 | 0,97  | 0,279093539 | -0,19 | 0,88064229  |
| Ube2d2a  | -0,01 | 0,993175772 | -0,03 | 0,958856577 | 0,57  | 0,357216772 | 0,1   | 0,817237762 | 0,14  | 0,824818547 |
| Ube2d2b  | 0,09  | 0,964272364 | -0,25 | 0,764491894 | 0,02  | 0,991005494 | 0,49  | 0,446858732 | 0,41  | 0,665933079 |
| Ube2d3   | 0,07  | 0,881366092 | 0,11  | 0,818613446 | -0,02 | 0,978207511 | 0,12  | 0,739942224 | 0,2   | 0,706086004 |
| Ube2dnl1 | 0,06  | 0,967635221 | 0,54  | 0,214321569 | -0,11 | 0,918441706 | -0,18 | 0,633071558 | -0,09 | 0,91423979  |
| Ube2dnl2 | 0,33  | 0,61200942  | 0     | 0,999692079 | -0,39 | 0,464639399 | -0,16 | 0,855131903 | 0,2   | 0,840952901 |
| Ube2d-ps | 0,14  | 0,869225685 | -0,05 | 0,933075539 | -0,03 | 0,983439952 | -0,43 | 0,487885164 | -0,21 | 0,817563348 |

|          |       |             |       |             |       |             |       |             |       |             |
|----------|-------|-------------|-------|-------------|-------|-------------|-------|-------------|-------|-------------|
| Ube2e1   | 0,07  | 0,925084264 | 0,3   | 0,753890677 | 0,04  | 0,959862254 | 0,38  | 0,595731091 | 0,35  | 0,674843991 |
| Ube2e2   | 0,14  | 0,802427928 | 0,48  | 0,700928109 | -0,23 | 0,864598204 | -0,04 | 0,958172386 | -0,15 | 0,874195313 |
| Ube2e3   | -0,02 | 0,984223418 | -0,44 | 0,707806354 | 0,11  | 0,933242192 | -0,02 | 0,973637901 | 0,01  | 0,99257599  |
| Ube2f    | 0,81  | 0,247254947 | 0,4   | 0,732847182 | 0,07  | 0,9360611   | 0,71  | 0,223254991 | 0,77  | 0,185914462 |
| Ube2g1   | 0,04  | 0,949541186 | 0,22  | 0,629816545 | -0,05 | 0,95106142  | 0,56  | 0,137646112 | -0,1  | 0,897225874 |
| Ube2g2   | -0,06 | 0,946792769 | -0,05 | 0,951647929 | -0,37 | 0,617592492 | -0,12 | 0,800853287 | -0,29 | 0,573405587 |
| Ube2h    | -0,25 | 0,651614017 | -0,37 | 0,432633995 | -0,15 | 0,908400411 | 0,73  | 0,091721204 | 0,05  | 0,961281513 |
| Ube2i    | 0     | 0,998017023 | 0,08  | 0,915265253 | -0,04 | 0,962519999 | 0,66  | 0,18011302  | 0,36  | 0,540645977 |
| Ube2j1   | -0,18 | 0,724803365 | 0,25  | 0,535229346 | 0,27  | 0,679157998 | 0,32  | 0,311046631 | 0,33  | 0,4940585   |
| Ube2j2   | -0,1  | 0,919758492 | -0,23 | 0,862425749 | 0,78  | 0,42076447  | 0,79  | 0,220294327 | 0,63  | 0,199590993 |
| Ube2k    | 0     | 0,996998625 | 0,05  | 0,917223247 | 0,2   | 0,665727181 | 0,52  | 0,200210053 | 0,03  | 0,976743304 |
| Ube2l3   | -0,08 | 0,869946494 | -0,24 | 0,697811585 | 0,13  | 0,89935302  | 0,25  | 0,556454714 | -0,35 | 0,556441073 |
| Ube2l6   | 0,71  | 0,142684805 | 0,98  | 0,087315688 | -1,3  | 0,036818657 | 0,03  | 0,965664624 | 1,67  | 0,010449134 |
| Ube2m    | -0,12 | 0,897013506 | -0,31 | 0,68486263  | 0,59  | 0,462643491 | 1,43  | 0,032533846 | -0,32 | 0,666758661 |
| Ube2n    | 0,26  | 0,683444889 | 0     | 1           | 0,56  | 0,493193538 | 0,1   | 0,953222061 | 0,42  | 0,757147567 |
| Ube2o    | -0,55 | 0,344087078 | -0,37 | 0,715688609 | 0,13  | 0,888677583 | -0,13 | 0,837704951 | -0,48 | 0,432720148 |
| Ube2q1   | -0,2  | 0,61660035  | 0,02  | 0,980518468 | -0,11 | 0,896164273 | 0,31  | 0,64059095  | 0,14  | 0,880134862 |
| Ube2q2   | -0,92 | 0,213935959 | -0,06 | 0,925569254 | 0,55  | 0,603802059 | 1,12  | 0,575912901 | 0,99  | 0,621590361 |
| Ube2q11  | -0,15 | 0,842297453 | 0     | 1           | -0,3  | 0,677597361 | 0,01  | 0,977322993 | 0,03  | 0,976743304 |
| Ube2r2   | 0,1   | 0,808379727 | -0,15 | 0,822383509 | -0,04 | 0,97041109  | 0,9   | 0,044831585 | 0,15  | 0,876418697 |
| Ube2s    | -0,39 | 0,301226191 | -0,32 | 0,467271424 | 0,55  | 0,274359445 | 0,61  | 0,126001164 | 0,18  | 0,768020562 |
| Ube2t    | -0,55 | 0,757499328 | -0,96 | 0,383504117 | 0,28  | 0,674947565 | 1,8   | 0,075762884 | 0,02  | 0,980961333 |
| Ube2u    | 0,37  | 0,598582945 | 0,07  | 0,929785201 | -0,1  | 0,906780086 | -0,35 | 0,714226488 | 0,02  | 0,990846056 |
| Ube2uos  | 0,13  | 0,813460438 | 0,15  | 0,826127202 | 0,03  | 0,965656549 | 0,07  | 0,912193677 | 0,01  | 0,984125319 |
| Ube2v2   | -0,02 | 0,990615139 | -0,33 | 0,544380607 | 0,45  | 0,800142198 | 0,1   | 0,902632056 | -0,35 | 0,700875396 |
| Ube2w    | 0,04  | 0,967225725 | -0,49 | 0,599021965 | 0,09  | 0,908364112 | 0,18  | 0,81096279  | 0,05  | 0,96963338  |
| Ube2z    | -0,01 | 0,993728727 | 0     | 1           | 0,24  | 0,789969951 | 0,21  | 0,628137192 | -0,09 | 0,917844354 |
| Ube3a    | -0,2  | 0,78682706  | 0,02  | 0,994137877 | 0,25  | 0,809137779 | -0,35 | 0,270683904 | 0,19  | 0,831834722 |
| Ube3b    | -0,1  | 0,895359408 | 0,02  | 0,992017084 | 0,54  | 0,494593149 | -0,27 | 0,74514989  | -0,73 | 0,395349481 |
| Ube3c    | 0     | 0,998769353 | -0,29 | 0,686227358 | 0,44  | 0,638689491 | 0,1   | 0,813792791 | -0,32 | 0,514744181 |
| Ube4a    | -0,39 | 0,586458491 | -0,13 | 0,887448685 | -0,44 | 0,425782502 | 0,27  | 0,601688484 | 0,03  | 0,976743304 |
| Ube4b    | -0,19 | 0,724499969 | -0,14 | 0,765370871 | 0,23  | 0,742758388 | 0,54  | 0,186919907 | -0,22 | 0,731527639 |
| Ube4bos1 | 0,38  | 0,588118389 | 0,65  | 0,649611595 | 0,24  | 0,804821595 | -0,15 | 0,854613369 | -0,18 | 0,868602248 |
| Ube4bos3 | 0,07  | 0,916074217 | 0,17  | 0,855632384 | 0,14  | 0,826840894 | 0,3   | 0,48312393  | -0,02 | 0,985448733 |
| Ubfd1    | -0,12 | 0,816316218 | -0,28 | 0,575306502 | -0,1  | 0,910060392 | 1,01  | 0,195975781 | -0,09 | 0,927906411 |

|        |       |             |       |             |       |             |       |             |       |             |
|--------|-------|-------------|-------|-------------|-------|-------------|-------|-------------|-------|-------------|
| Ubiad1 | 0,24  | 0,670542104 | 0,27  | 0,617055108 | -0,22 | 0,802795561 | 0,2   | 0,788850877 | 0,47  | 0,50482419  |
| Ubl3   | 0,1   | 0,86967476  | 0,42  | 0,390330254 | 0,26  | 0,754337745 | -0,34 | 0,367482816 | 0,29  | 0,601753447 |
| Ubl4a  | -0,52 | 0,388432897 | -0,53 | 0,555137972 | 0,51  | 0,473293361 | 0,41  | 0,57372642  | 0,25  | 0,684658891 |
| Ubl4b  | -0,03 | 0,970979277 | 0     | 0,998513452 | 0,15  | 0,76031147  | 0,08  | 0,866389603 | -0,11 | 0,890417696 |
| Ubl5   | -0,16 | 0,871941635 | -0,03 | 0,975427696 | -0,65 | 0,308773662 | 0,39  | 0,71986392  | 0,63  | 0,527815148 |
| Ubl7   | -0,07 | 0,928103232 | 0,28  | 0,486712798 | 0,19  | 0,786933951 | -0,1  | 0,824541521 | -0,22 | 0,734672945 |
| Ublcp1 | 0,17  | 0,844688163 | -0,11 | 0,855632384 | 0,02  | 0,987390039 | 0,13  | 0,804193987 | 0,09  | 0,916173996 |
| Ubn1   | -0,03 | 0,965482773 | 0,29  | 0,484308011 | 0,16  | 0,845993227 | -0,21 | 0,695155091 | -0,41 | 0,662284041 |
| Ubn2   | 0,57  | 0,20299588  | -0,12 | 0,851208256 | -0,49 | 0,323246778 | 0,29  | 0,639765346 | 0,18  | 0,866693394 |
| Ubox5  | -0,77 | 0,297096518 | -0,03 | 0,990272104 | 0,05  | 0,982305856 | 0,21  | 0,870202269 | 0,6   | 0,574285481 |
| Ubp1   | -0,22 | 0,613387484 | -0,18 | 0,753873417 | 0,09  | 0,915836302 | 0,48  | 0,333300162 | 0,45  | 0,476496602 |
| Ubqln1 | -0,1  | 0,87094817  | -0,37 | 0,494161701 | 0,2   | 0,763076859 | 0,67  | 0,123780343 | -0,04 | 0,977236465 |
| Ubqln2 | -0,27 | 0,49976831  | -0,09 | 0,855261337 | 0,33  | 0,460914763 | 0,21  | 0,598657551 | -0,15 | 0,833989952 |
| Ubqln3 | -0,04 | 0,958512892 | 0,03  | 0,956935029 | 0,12  | 0,885556448 | 0,05  | 0,908141892 | 0,02  | 0,983469081 |
| Ubqln4 | -0,37 | 0,583196213 | -0,04 | 0,958545812 | 0,28  | 0,68845998  | 0,14  | 0,765285697 | -0,19 | 0,741766428 |
| Ubqlnl | 0,42  | 0,573557207 | 0,21  | 0,619709049 | 0,3   | 0,529358903 | -0,07 | 0,913974287 | -0,09 | 0,920355527 |
| Ubr1   | -0,11 | 0,846868468 | 0,32  | 0,388595716 | -0,17 | 0,861307315 | -0,72 | 0,23511456  | 0,3   | 0,721664501 |
| Ubr2   | -0,05 | 0,945504973 | -0,26 | 0,620236896 | 0,08  | 0,9241587   | -0,03 | 0,95852873  | -0,06 | 0,931519966 |
| Ubr3   | -0,39 | 0,341853862 | 0,21  | 0,75336328  | 0,02  | 0,98722236  | -0,16 | 0,793438229 | 0,35  | 0,608072805 |
| Ubr4   | 0,08  | 0,90814211  | 0,28  | 0,544440118 | -0,12 | 0,9113279   | 0,04  | 0,921929178 | -0,19 | 0,751523405 |
| Ubr5   | 0,2   | 0,610662221 | 0,24  | 0,568187167 | 0,33  | 0,570786931 | 0,08  | 0,830938104 | -0,2  | 0,738844505 |
| Ubr7   | -0,59 | 0,282070177 | -0,47 | 0,815791007 | 0,84  | 0,324705558 | 0,46  | 0,3016644   | -0,34 | 0,696378681 |
| Ubt1   | -0,33 | 0,546065357 | -0,31 | 0,609632892 | 0,32  | 0,702689055 | 2,07  | 0,007936109 | 0,36  | 0,536639649 |
| Ubt2   | 0,18  | 0,770347758 | 0,04  | 0,962980292 | 0,46  | 0,404120029 | 0,37  | 0,71158821  | 0,59  | 0,567367057 |
| Ubtif  | -0,24 | 0,697992827 | -0,07 | 0,932292974 | -0,11 | 0,888677583 | 0,13  | 0,899176026 | -0,2  | 0,842936569 |
| Ubtfl1 | 0,19  | 0,805259259 | 0,08  | 0,926353869 | -0,11 | 0,930645703 | 0,05  | 0,952342947 | 0,85  | 0,155716667 |
| Ubxn1  | -0,05 | 0,936047326 | 0,05  | 0,911258707 | 0,11  | 0,876684089 | 0,68  | 0,262571926 | 0,54  | 0,403953654 |
| Ubxn10 | 0,12  | 0,798990216 | -0,5  | 0,4732289   | -0,37 | 0,530603857 | 0,32  | 0,601996277 | 0,38  | 0,548884611 |
| Ubxn11 | -0,05 | 0,958188047 | 0,46  | 0,670859269 | -0,24 | 0,646965864 | -0,08 | 0,932800758 | 0,32  | 0,674381312 |
| Ubxn2a | -0,59 | 0,214534082 | 0,14  | 0,792290003 | 0,75  | 0,163524963 | 0,91  | 0,310584393 | 0,14  | 0,952753183 |
| Ubxn2b | -0,81 | 0,504621759 | -0,28 | 0,788759447 | 0,3   | 0,71773035  | 0,2   | 0,84745429  | 0,29  | 0,835191    |
| Ubxn4  | 0,13  | 0,752554638 | 0,02  | 0,981441793 | -0,3  | 0,579810168 | 0,15  | 0,736423588 | 0,22  | 0,724669859 |
| Ubxn6  | 0,18  | 0,719765184 | 0,07  | 0,95121799  | 0,2   | 0,763552205 | -0,25 | 0,522894482 | 0,07  | 0,924988445 |
| Ubxn7  | -0,06 | 0,916056273 | -0,16 | 0,792290003 | -0,02 | 0,991456043 | -0,16 | 0,778817721 | -0,34 | 0,6440655   |
| Ubxn8  | 0,04  | 0,95290436  | -0,02 | 0,980518468 | 0,49  | 0,473499244 | -0,24 | 0,550271886 | -0,04 | 0,969617491 |



|         |       |             |       |             |       |             |       |             |       |             |
|---------|-------|-------------|-------|-------------|-------|-------------|-------|-------------|-------|-------------|
| Uchl1   | -0,62 | 0,278657576 | -0,54 | 0,356307531 | 0,59  | 0,112229182 | -1,24 | 0,034590782 | -0,99 | 0,083660756 |
| Uchl1os | 0,18  | 0,652607099 | -0,14 | 0,857490594 | -0,25 | 0,637020491 | 0,15  | 0,860410443 | -0,12 | 0,932846086 |
| Uchl3   | -0,62 | 0,778150987 | -0,74 | 0,383504117 | 0,78  | 0,764620512 | 1,49  | 0,212925448 | 0,74  | 0,487064794 |
| Uchl4   | -0,13 | 0,780084058 | -0,65 | 0,261025347 | 0,27  | 0,628978443 | 0,77  | 0,152658168 | 0,41  | 0,51891273  |
| Uchl5   | -0,19 | 0,823117065 | -0,47 | 0,428093777 | 0,68  | 0,61190379  | 0,98  | 0,283477648 | 0,18  | 0,914218722 |
| Uck1    | -0,38 | 0,776839834 | 0,78  | 0,216491969 | -1,15 | 0,194748155 | -0,22 | 0,896893    | 0,31  | 0,858534673 |
| Uck2    | -0,78 | 0,20299588  | -0,6  | 0,154882285 | 0,43  | 0,302861841 | 3,17  | 0,005660788 | -0,4  | 0,635612479 |
| Uckl1   | -0,22 | 0,737939986 | -0,04 | 0,97190521  | 0,72  | 0,415635321 | 0,16  | 0,737366847 | 0,04  | 0,965244101 |
| Uckl1os | 0,02  | 0,988674093 | -0,68 | 0,135303558 | -0,1  | 0,905232693 | 0,86  | 0,033318269 | -0,07 | 0,943835199 |
| Ucma    | 0,07  | 0,950532575 | -0,13 | 0,818613446 | 0,05  | 0,9512408   | 0,05  | 0,902967602 | 0,39  | 0,419559908 |
| Ucn     | -0,03 | 0,972720447 | -0,13 | 0,814499098 | -0,01 | 0,993379272 | -0,03 | 0,93808802  | -0,11 | 0,874554354 |
| Ucn2    | -0,15 | 0,832350641 | -0,11 | 0,818597532 | 0,32  | 0,450605545 | 0,17  | 0,77523305  | 0,14  | 0,835772048 |
| Ucn3    | -0,07 | 0,922118639 | -0,05 | 0,966436684 | -0,2  | 0,806102885 | 0,05  | 0,905304704 | 0,13  | 0,864166878 |
| Ucp1    | 0,7   | 0,171930166 | 0,5   | 0,647475869 | 0,33  | 0,641775458 | 0,43  | 0,287840988 | 0,34  | 0,655956123 |
| Ucp2    | -0,68 | 0,46691413  | 0,14  | 0,946885634 | -0,55 | 0,676139587 | -1,68 | 0,17725751  | -0,86 | 0,671059641 |
| Ucp3    | 0,08  | 0,925089986 | -0,64 | 0,602549494 | -0,27 | 0,723037215 | 0,44  | 0,726287112 | 0,16  | 0,906189244 |
| Uevld   | -0,59 | 0,44306682  | 0,15  | 0,831685312 | 0,53  | 0,50329134  | -0,09 | 0,928315881 | -0,67 | 0,487884435 |
| Ufc1    | -0,02 | 0,970959475 | -0,06 | 0,90164068  | 0,17  | 0,841669036 | 0,88  | 0,074176128 | 0,15  | 0,854494093 |
| Ufd1l   | -0,05 | 0,928103232 | -0,01 | 0,993068441 | -0,07 | 0,927950027 | 0,57  | 0,247845465 | 0,18  | 0,826492226 |
| Ufl1    | 0,03  | 0,95538722  | -0,37 | 0,585595533 | 0,81  | 0,154824552 | 0,25  | 0,713062148 | 0,23  | 0,855741842 |
| Ufm1    | -0,3  | 0,532948347 | -0,49 | 0,219055424 | 0,65  | 0,26430961  | 1,01  | 0,046206622 | -0,29 | 0,631872562 |
| Ufsp1   | -0,19 | 0,757499328 | 0,19  | 0,903682621 | 0,3   | 0,66170364  | -0,24 | 0,683342816 | 0,41  | 0,587305934 |
| Ufsp2   | -0,02 | 0,975506993 | -0,32 | 0,679872735 | 0,86  | 0,159167301 | 0,91  | 0,146784762 | -0,06 | 0,952296554 |
| Ugcg    | 0,03  | 0,964154899 | 0,36  | 0,511537984 | 0,27  | 0,729031049 | 1,98  | 0,008655926 | 0,33  | 0,524708288 |
| Ugdh    | -0,45 | 0,427374823 | 0     | 1           | 0,59  | 0,400880567 | -0,53 | 0,471723559 | -0,62 | 0,304393671 |
| Uggt1   | -0,07 | 0,922591969 | -0,16 | 0,765325717 | 0,02  | 0,987076439 | 0,44  | 0,225546705 | 0,46  | 0,456327568 |
| Uggt2   | -0,44 | 0,51326218  | 0,77  | 0,490814009 | 0,08  | 0,950862176 | -0,86 | 0,174313619 | -0,01 | 0,992980215 |
| Ugp2    | 0     | 0,999549745 | -0,1  | 0,882589938 | 0,24  | 0,789396261 | -0,2  | 0,739921734 | -0,08 | 0,940438527 |
| Ugt1a1  | 0,53  | 0,187868882 | -0,85 | 0,395346308 | -1,51 | 0,527929204 | 0,79  | 0,070652116 | 0,39  | 0,783707054 |
| Ugt1a10 | -0,11 | 0,888652674 | -0,14 | 0,842145037 | -0,1  | 0,943788892 | -0,18 | 0,783961371 | -0,17 | 0,881943508 |
| Ugt1a2  | -1,35 | 0,242651292 | -1,05 | 0,762380259 | 0,93  | 0,548839869 | -1,19 | 0,740192523 | 2,99  | 0,203422529 |
| Ugt1a5  | 0,25  | 0,616460255 | -0,09 | 0,929895266 | 0,08  | 0,94665439  | 0,19  | 0,806311687 | 0     | 0,99584117  |
| Ugt1a6a | -0,71 | 0,768809729 | -0,44 | 0,912137323 | 0,65  | 0,831720346 | 0,49  | 0,825332212 | -1,04 | 0,550744961 |
| Ugt1a6b | -0,81 | 0,154931826 | -1,93 | 0,098272554 | -0,29 | 0,875486206 | 1,68  | 0,01505046  | -0,47 | 0,604239727 |
| Ugt1a7c | -0,46 | 0,899663752 | -0,09 | 0,986535927 | 1,9   | 0,083866478 | 3,17  | 0,190917389 | 0,27  | 0,910212022 |

|           |       |             |       |             |       |             |       |             |       |             |
|-----------|-------|-------------|-------|-------------|-------|-------------|-------|-------------|-------|-------------|
| Ugt1a9    | 0,5   | 0,680850255 | -0,6  | 0,624712123 | -0,55 | 0,613433145 | 0,33  | 0,695795786 | -0,18 | 0,873506336 |
| Ugt2a1    | -0,03 | 0,975664126 | 0,07  | 0,929692416 | 0,3   | 0,721952929 | -0,19 | 0,715825968 | 0,06  | 0,953691882 |
| Ugt2a2    | 0,22  | 0,766188287 | 0     | 1           | -0,3  | 0,839628065 | -0,56 | 0,626029171 | -0,74 | 0,141623517 |
| Ugt2a3    | 0,6   | 0,37235038  | 0,09  | 0,927073711 | -0,1  | 0,928606229 | 0,06  | 0,942491333 | 0,06  | 0,961749007 |
| Ugt2b1    | -0,01 | 0,991919022 | 0,13  | 0,829839151 | -0,29 | 0,712506769 | 0,04  | 0,970771707 | 0,07  | 0,953297732 |
| Ugt2b34   | -0,46 | 0,606922012 | 0,61  | 0,792112243 | 0,01  | 0,995401448 | -0,5  | 0,404009989 | 0,22  | 0,871038748 |
| Ugt2b35   | 0,16  | 0,800851935 | 0,61  | 0,383563451 | 0,09  | 0,934813979 | -0,64 | 0,173468279 | -0,31 | 0,633417089 |
| Ugt2b37   | 0,27  | 0,496008309 | -0,08 | 0,8733735   | -0,55 | 0,530603857 | 0,19  | 0,740510034 | -0,25 | 0,741766428 |
| Ugt2b38   | 0,12  | 0,896152991 | -0,2  | 0,821227978 | 0,12  | 0,914320423 | 0,32  | 0,749078673 | 0,36  | 0,787061733 |
| Ugt2b5    | 0,18  | 0,761457464 | -0,13 | 0,839673299 | 0,03  | 0,973732268 | -0,06 | 0,911258809 | 0,11  | 0,891925115 |
| Ugt3a1    | -0,02 | 0,971746213 | -0,06 | 0,925569254 | 0,1   | 0,859411859 | -0,22 | 0,743170266 | 1,17  | 0,510946331 |
| Ugt3a2    | -0,33 | 0,688503606 | -0,24 | 0,857408462 | -0,02 | 0,989464734 | -1,13 | 0,549139201 | 0,88  | 0,799803346 |
| Ugt8a     | 0,16  | 0,87350924  | 0,52  | 0,373459266 | 0,23  | 0,717856288 | -0,12 | 0,881064884 | 0,14  | 0,914498972 |
| Uhmk1     | -0,37 | 0,795567544 | 0,08  | 0,924342001 | -0,75 | 0,388144291 | 0,74  | 0,474113119 | 0,77  | 0,564402665 |
| Uhrf1     | -1,94 | 0,053789028 | -1,88 | 0,084290601 | 2,09  | 0,068894819 | 2,88  | 0,003907268 | -0,28 | 0,640381913 |
| Uhrf1bp1  | -0,22 | 0,765643907 | -0,28 | 0,652585874 | 0,67  | 0,445616611 | 0,4   | 0,36787806  | -0,01 | 0,992370267 |
| Uhrf1bp1l | -0,42 | 0,419591944 | 0,05  | 0,969019461 | -0,21 | 0,740579016 | 0,32  | 0,580120569 | -0,09 | 0,952200672 |
| Uhrf2     | 0,3   | 0,707440816 | 0,21  | 0,670902144 | -0,05 | 0,952435822 | 0     | 0,999221046 | 0,42  | 0,587305934 |
| Uimc1     | -0,54 | 0,180356049 | 0,1   | 0,896322235 | -0,11 | 0,933880691 | 0,25  | 0,728067633 | 0,36  | 0,629683647 |
| Ulbp1     | 0     | 0,999549745 | 0,6   | 0,302028989 | 0,44  | 0,716587297 | 0,65  | 0,385018483 | -0,92 | 0,513517573 |
| Ulk1      | -0,06 | 0,937580579 | -0,26 | 0,785128233 | 0,44  | 0,379638471 | -0,09 | 0,858632076 | -0,44 | 0,487064794 |
| Ulk2      | -0,08 | 0,90651164  | -0,22 | 0,703041962 | 0,37  | 0,684455958 | 0,2   | 0,611276029 | -0,21 | 0,743091876 |
| Ulk3      | -0,33 | 0,73787988  | 0,21  | 0,851738945 | -0,42 | 0,652544551 | -0,5  | 0,535964704 | -0,44 | 0,749100093 |
| Ulk4      | -0,33 | 0,542031994 | -0,27 | 0,700297886 | -0,11 | 0,909233941 | 0,48  | 0,513261302 | 0,17  | 0,872242794 |
| Umad1     | -0,16 | 0,8634587   | -0,22 | 0,765325717 | 0,1   | 0,915328186 | 0,12  | 0,841644929 | -0,13 | 0,894623317 |
| Umod      | 0,22  | 0,70137787  | 0,07  | 0,954324398 | -0,23 | 0,656878693 | -4,22 | 0,032044874 | -1    | 0,490247948 |
| Umodl1    | -0,38 | 0,472993837 | 0,13  | 0,878066294 | -0,47 | 0,373207762 | 0,1   | 0,879546426 | 0,45  | 0,447019099 |
| Umps      | -1,04 | 0,293334505 | -1,36 | 0,051918634 | 0,97  | 0,044715282 | 0,52  | 0,389966246 | -0,41 | 0,783490449 |
| Unc119    | -1,05 | 0,134471564 | -0,97 | 0,410641926 | 0,75  | 0,570755021 | 0,45  | 0,707902199 | -0,63 | 0,679019677 |
| Unc119b   | -0,27 | 0,597519827 | 0,2   | 0,697354745 | -0,08 | 0,923350407 | -1,48 | 0,009344805 | -0,43 | 0,33353181  |
| Unc13a    | 0,25  | 0,572123254 | -0,44 | 0,296555248 | -0,28 | 0,760721308 | 1,04  | 0,021262879 | 0,05  | 0,951334914 |
| Unc13b    | -0,27 | 0,724803365 | 0,45  | 0,493391321 | 0,42  | 0,398319086 | -0,94 | 0,219776615 | -0,43 | 0,628127128 |
| Unc13c    | -0,2  | 0,769718017 | 0,48  | 0,298168653 | -0,06 | 0,95204022  | -0,33 | 0,408140825 | -0,08 | 0,946170694 |
| Unc13d    | 0,18  | 0,846313357 | 0,27  | 0,774377142 | 0,3   | 0,712506769 | -0,16 | 0,837974367 | -0,5  | 0,32673984  |
| Unc45a    | -0,27 | 0,74140155  | -0,24 | 0,605292801 | -0,05 | 0,961873441 | 0,08  | 0,8914104   | -0,68 | 0,211416778 |

|          |       |             |       |             |       |             |       |             |       |             |
|----------|-------|-------------|-------|-------------|-------|-------------|-------|-------------|-------|-------------|
| Unc45b   | 0     | 0,998245534 | 0,43  | 0,347137683 | -0,03 | 0,976042637 | -0,25 | 0,480319034 | -0,28 | 0,673577848 |
| Unc45bos | 0,03  | 0,984040323 | 0,25  | 0,831580851 | 0,27  | 0,772782651 | -0,4  | 0,470236257 | 0,12  | 0,867093565 |
| Unc50    | 0,26  | 0,744826448 | -0,11 | 0,885939034 | 0,25  | 0,843394396 | 0,38  | 0,308317338 | 0,52  | 0,244456027 |
| Unc5a    | -0,5  | 0,427983825 | -0,1  | 0,896187678 | 0     | 0,997268369 | -0,7  | 0,140538478 | -0,4  | 0,583535515 |
| Unc5b    | -1,11 | 0,097625832 | -0,92 | 0,188301476 | 0,72  | 0,204247489 | 1,23  | 0,075796859 | 0,29  | 0,758052028 |
| Unc5c    | 0,03  | 0,967663777 | -0,04 | 0,975427696 | -0,19 | 0,811424918 | -0,81 | 0,266719882 | -0,83 | 0,387681311 |
| Unc5cl   | -0,11 | 0,886464924 | -0,42 | 0,337556346 | 0,03  | 0,980423952 | 0,41  | 0,484534044 | -0,3  | 0,662029815 |
| Unc5d    | 0,07  | 0,877707741 | 0,1   | 0,817437045 | 0,05  | 0,944441051 | -0,15 | 0,657493591 | 0,27  | 0,657201901 |
| Unc79    | 0,47  | 0,470397003 | -0,04 | 0,967776673 | -0,24 | 0,737532305 | -0,15 | 0,839149192 | -0,34 | 0,744850786 |
| Unc80    | 0,14  | 0,770393994 | 0,06  | 0,926277251 | -0,21 | 0,772397144 | 0,03  | 0,967866794 | 0,12  | 0,885673683 |
| Unc93a   | -0,03 | 0,972989101 | -0,17 | 0,896322235 | -0,73 | 0,153783119 | 0,04  | 0,959557369 | -0,06 | 0,939127163 |
| Unc93b1  | 0,37  | 0,540951867 | 0,38  | 0,666450149 | -0,35 | 0,550662565 | 0,64  | 0,230237236 | 0,42  | 0,445839943 |
| Uncx     | 0,01  | 0,992748202 | 0,2   | 0,832194263 | -0,1  | 0,937222375 | 0,32  | 0,393138399 | 0,3   | 0,745574572 |
| Ung      | -0,71 | 0,241072435 | -0,42 | 0,670859269 | 0,93  | 0,288923753 | 0,82  | 0,407384348 | -0,63 | 0,587305934 |
| Unk      | -0,31 | 0,707070061 | 0,13  | 0,855632384 | -0,18 | 0,838592669 | -0,15 | 0,749715866 | -0,13 | 0,866285506 |
| Unkl     | 0,4   | 0,263252718 | 0,03  | 0,964757836 | 0,13  | 0,855523214 | -0,76 | 0,107316411 | -0,16 | 0,796713037 |
| Uox      | -0,22 | 0,734138206 | 0,08  | 0,951374483 | -0,14 | 0,831266864 | -0,12 | 0,886149988 | -0,47 | 0,480475596 |
| Upb1     | -0,07 | 0,954746388 | 0,64  | 0,219055424 | -0,42 | 0,462643491 | -1,15 | 0,190450965 | 0,01  | 0,994116818 |
| Upf1     | -0,69 | 0,233248426 | -0,03 | 0,976583732 | -0,02 | 0,983759267 | 0,11  | 0,880719206 | 0,15  | 0,86811326  |
| Upf2     | -0,34 | 0,586458491 | -0,28 | 0,803629137 | 0,59  | 0,617095989 | 0,11  | 0,905614221 | 0,3   | 0,720844381 |
| Upf3a    | -0,22 | 0,647337606 | 0,19  | 0,855648379 | 0,21  | 0,77957681  | -0,1  | 0,796472332 | 0,14  | 0,894327929 |
| Upf3b    | -0,12 | 0,905410659 | -0,7  | 0,287110213 | 0,21  | 0,84318645  | 0,38  | 0,650692364 | 0,12  | 0,939448119 |
| Upk1a    | -0,75 | 0,294535935 | 0,05  | 0,956049982 | 0,29  | 0,760075811 | 0     | 0,996714438 | -0,12 | 0,869051917 |
| Upk1b    | 0,28  | 0,630133896 | -0,03 | 0,969481475 | 0,04  | 0,976874033 | -0,26 | 0,721544352 | 0,02  | 0,984065984 |
| Upk2     | 0,43  | 0,473521576 | -0,15 | 0,813541606 | -0,1  | 0,922318683 | -0,15 | 0,705369216 | -0,31 | 0,640616198 |
| Upk3a    | -0,25 | 0,645559207 | -0,03 | 0,977103763 | -0,16 | 0,845655136 | -0,19 | 0,680255321 | 0     | 0,997254437 |
| Upk3b    | 0,12  | 0,886680488 | -0,24 | 0,570505903 | 0,08  | 0,936840991 | 0,25  | 0,4729993   | 0,04  | 0,979456872 |
| Upk3bl   | -0,07 | 0,9231839   | 0,12  | 0,849211072 | -0,43 | 0,541560473 | 0,05  | 0,936267288 | -0,07 | 0,951471487 |
| Upp1     | 1,13  | 0,023509566 | 0,82  | 0,091198946 | -1,02 | 0,017324961 | 0,75  | 0,100873888 | 1,52  | 0,011688351 |
| Upp2     | 0,06  | 0,94669491  | -0,05 | 0,949563977 | -0,39 | 0,612977553 | 0,46  | 0,34448777  | -0,02 | 0,98653183  |
| Uprt     | -0,58 | 0,575127945 | -0,47 | 0,725935658 | 0,18  | 0,834998056 | 0,1   | 0,935525116 | -0,37 | 0,573106355 |
| Uqcc1    | -0,23 | 0,829299665 | 0,53  | 0,667502888 | 0,59  | 0,421026326 | -0,76 | 0,200341841 | 0,05  | 0,9651757   |
| Uqcc2    | 0,36  | 0,443068183 | -0,44 | 0,291906994 | 0,26  | 0,671012215 | 0,26  | 0,526586186 | -0,01 | 0,990091016 |
| Uqcc3    | -0,25 | 0,505856084 | 0,19  | 0,74583457  | 0,16  | 0,828036964 | 0,43  | 0,299111488 | 0,25  | 0,64934615  |
| Uqcr10   | -0,16 | 0,698332739 | -0,3  | 0,517288934 | 0,39  | 0,641764537 | 0,65  | 0,25645371  | 0     | 0,9969305   |

|         |       |             |       |             |       |             |       |             |       |             |
|---------|-------|-------------|-------|-------------|-------|-------------|-------|-------------|-------|-------------|
| Uqcr11  | 0,05  | 0,93534828  | -0,34 | 0,565639972 | 0,17  | 0,766234611 | 0,26  | 0,486912097 | -0,04 | 0,968038677 |
| Uqcrb   | -0,02 | 0,966775766 | -0,14 | 0,76847744  | 0,15  | 0,817818413 | 0,09  | 0,820745707 | 0,02  | 0,984125319 |
| Uqcrc1  | -0,6  | 0,124654295 | -0,42 | 0,391122953 | 0,63  | 0,215429632 | 0,1   | 0,802221833 | -0,6  | 0,220634131 |
| Uqcrc2  | -0,32 | 0,496123406 | -0,08 | 0,896187678 | 0,79  | 0,304899885 | 0,04  | 0,961123444 | 0,01  | 0,992370267 |
| Uqcrfs1 | -0,13 | 0,757499328 | 0,14  | 0,755498335 | 0,15  | 0,842645515 | 0,4   | 0,194768944 | 0     | 0,994265717 |
| Uqcrh   | 0,12  | 0,787002876 | 0,18  | 0,644818618 | -0,14 | 0,888829018 | 0,08  | 0,879339892 | -0,12 | 0,870231809 |
| Uqcrq   | 0,28  | 0,595245851 | -0,12 | 0,858485979 | 0,12  | 0,909340521 | 0,5   | 0,407758202 | -0,03 | 0,979392852 |
| Urad    | 0,25  | 0,680520303 | 0,18  | 0,831685312 | 0,01  | 0,990836784 | 0,01  | 0,989926105 | 0,56  | 0,31182908  |
| Urah    | 0,03  | 0,973117883 | -0,04 | 0,955390807 | 0,28  | 0,706714392 | -0,06 | 0,929835301 | -0,34 | 0,562557824 |
| Urb1    | -0,18 | 0,809762393 | -0,36 | 0,651587568 | 0,84  | 0,232806399 | 0,49  | 0,481353031 | -0,05 | 0,977236465 |
| Urb2    | -0,41 | 0,36631183  | -0,23 | 0,67087404  | 0,91  | 0,660352863 | 0,61  | 0,48728376  | 0,17  | 0,893664107 |
| Urgcp   | 0,25  | 0,774822327 | -0,2  | 0,789051952 | 0,58  | 0,624087446 | -0,19 | 0,708926889 | -0,23 | 0,671841038 |
| Uri1    | -0,2  | 0,829299665 | -0,1  | 0,904429034 | 0,26  | 0,707447086 | 0,35  | 0,330898178 | -0,13 | 0,875713596 |
| Urm1    | 0,06  | 0,93534828  | 0,1   | 0,876406533 | 0,72  | 0,36121902  | 0,46  | 0,364934009 | 0,02  | 0,983613958 |
| Uroc1   | 0,11  | 0,86103164  | 0,04  | 0,946599376 | -0,08 | 0,915321116 | -0,17 | 0,823045201 | 0,16  | 0,886027227 |
| Urod    | -0,03 | 0,964857772 | -0,17 | 0,863915215 | 1,02  | 0,184164925 | 0,12  | 0,89132531  | -0,22 | 0,780128151 |
| Uros    | 0,13  | 0,922118639 | -0,14 | 0,849099971 | 0,03  | 0,985326269 | 0,41  | 0,687605168 | 0,38  | 0,780396104 |
| Usb1    | -0,2  | 0,813220024 | 0,4   | 0,655607331 | 0,1   | 0,897854072 | 1,33  | 0,258695369 | 0,74  | 0,541403235 |
| Use1    | 0,2   | 0,67905469  | 0,21  | 0,794259612 | -0,05 | 0,967930981 | -0,04 | 0,944558253 | 0,24  | 0,672033361 |
| Usf1    | 0,53  | 0,412607475 | 0,28  | 0,751382934 | 0,02  | 0,98773763  | 0,34  | 0,283327727 | 0,26  | 0,697757911 |
| Usf2    | -0,01 | 0,996219097 | -0,14 | 0,774278866 | -0,22 | 0,834069966 | -0,04 | 0,952133471 | -0,19 | 0,789505562 |
| Usf3    | 0,51  | 0,388392471 | 0,16  | 0,709432782 | 0,29  | 0,71773035  | -0,08 | 0,915941532 | -0,17 | 0,86809582  |
| Ush1c   | -0,28 | 0,657929675 | -0,37 | 0,728669599 | 0,21  | 0,880153436 | 0,17  | 0,758588473 | -0,22 | 0,782889048 |
| Ush1g   | 0,09  | 0,859285209 | 0,08  | 0,888906195 | 0,16  | 0,83480907  | -0,05 | 0,920317721 | -0,11 | 0,902638028 |
| Ush2a   | -0,17 | 0,786095978 | -0,12 | 0,850545717 | 0,18  | 0,709317317 | -0,04 | 0,939446012 | -0,22 | 0,726339638 |
| Ushbp1  | -0,64 | 0,146504462 | 0,02  | 0,981914565 | 0,03  | 0,977600423 | -0,76 | 0,076348362 | 0,12  | 0,867093565 |
| Usmg5   | -0,07 | 0,911399028 | -0,34 | 0,429168189 | 0,58  | 0,184201012 | 0,8   | 0,098563991 | -0,03 | 0,977967676 |
| Uso1    | -0,12 | 0,809050839 | -0,21 | 0,670644394 | 0,19  | 0,832665595 | 0,98  | 0,085675702 | 0,24  | 0,764124978 |
| Usp1    | -0,85 | 0,421378808 | -0,81 | 0,466954112 | 0,4   | 0,818172172 | 0,05  | 0,914828446 | 0,25  | 0,72393858  |
| Usp10   | -0,1  | 0,842292335 | -0,48 | 0,235116318 | 0,51  | 0,40953269  | 0,63  | 0,074454367 | 0,03  | 0,969230771 |
| Usp11   | 0,36  | 0,61200942  | -0,02 | 0,994802028 | 0,17  | 0,878688944 | -1,55 | 0,044831585 | -0,77 | 0,241394095 |
| Usp12   | -0,73 | 0,364497258 | 0,29  | 0,847821325 | -1,15 | 0,043102992 | 1,01  | 0,266567927 | 0,35  | 0,698795718 |
| Usp13   | -0,15 | 0,761212734 | 0,31  | 0,712500402 | -0,15 | 0,839921239 | 0,34  | 0,499929121 | 0,34  | 0,664512023 |
| Usp14   | -0,58 | 0,473521576 | -0,52 | 0,604765797 | 0,69  | 0,467503988 | 1,45  | 0,121193897 | 0,22  | 0,874717264 |
| Usp15   | -0,32 | 0,4827193   | 0,32  | 0,425465202 | 0,11  | 0,913797757 | 0,48  | 0,256790046 | 0,48  | 0,34276619  |

|          |       |             |       |             |       |             |       |             |       |             |
|----------|-------|-------------|-------|-------------|-------|-------------|-------|-------------|-------|-------------|
| Usp16    | -0,11 | 0,870163304 | -0,08 | 0,873446866 | -0,01 | 0,993686224 | 0,61  | 0,095106906 | 0,03  | 0,979456872 |
| Usp17la  | 0,29  | 0,707480624 | -0,09 | 0,956689397 | -0,28 | 0,757498725 | -0,14 | 0,937627059 | -0,16 | 0,947190443 |
| Usp17lb  | 0,17  | 0,852431537 | -0,56 | 0,508633526 | -0,04 | 0,961800548 | 0,13  | 0,800193063 | -0,22 | 0,771986794 |
| Usp18    | 0,77  | 0,097395165 | 0,63  | 0,222263752 | -0,09 | 0,942067055 | -0,94 | 0,051116277 | 0,81  | 0,114822669 |
| Usp19    | -0,17 | 0,808947569 | -0,16 | 0,830481143 | 0,11  | 0,891365932 | -0,19 | 0,609023716 | -0,15 | 0,825311688 |
| Usp2     | 0,13  | 0,861244408 | 0,76  | 0,373555617 | 0,09  | 0,901071918 | -1,04 | 0,051749824 | 0,06  | 0,947559952 |
| Usp20    | -0,23 | 0,859044359 | 0,05  | 0,937348524 | 0,9   | 0,222367762 | 0,1   | 0,886806548 | 0,33  | 0,628728585 |
| Usp21    | -0,68 | 0,109113269 | 0,81  | 0,188301476 | 0,11  | 0,907353858 | 0,05  | 0,923119077 | -0,25 | 0,725587145 |
| Usp22    | -0,27 | 0,59108421  | 0,03  | 0,970020205 | 0,54  | 0,468633043 | 0,27  | 0,585700527 | -0,31 | 0,655956123 |
| Usp24    | -0,16 | 0,761457464 | -0,11 | 0,821941061 | 0,43  | 0,430507107 | 0,15  | 0,728291963 | 0,09  | 0,909294188 |
| Usp25    | 0,24  | 0,683299822 | 0,36  | 0,469830103 | -0,1  | 0,934813979 | -0,32 | 0,482608486 | 0,54  | 0,380135725 |
| Usp26    | -0,26 | 0,496123406 | 0,11  | 0,875688773 | -0,04 | 0,963357998 | 0,13  | 0,790283101 | -0,13 | 0,879072575 |
| Usp27x   | -0,07 | 0,942661036 | -0,03 | 0,986440493 | 0,28  | 0,705811313 | -1,18 | 0,04599999  | -0,49 | 0,398637431 |
| Usp28    | -0,52 | 0,418840148 | 0,03  | 0,989873399 | 0,4   | 0,653810439 | -0,41 | 0,499384622 | -0,77 | 0,335679372 |
| Usp29    | -0,93 | 0,239601221 | -0,51 | 0,793476974 | 0,45  | 0,447140999 | 0,75  | 0,332938698 | -0,01 | 0,9939542   |
| Usp3     | 0     | 0,997266885 | 0,35  | 0,623534166 | 0,32  | 0,665554804 | 0,77  | 0,322409987 | 0,53  | 0,550083777 |
| Usp30    | -0,11 | 0,913546177 | 0,06  | 0,952737865 | -0,03 | 0,973874884 | -0,35 | 0,496666336 | -0,55 | 0,322663615 |
| Usp31    | 0,51  | 0,190677329 | 0,11  | 0,858860016 | -0,18 | 0,778653031 | 0,49  | 0,135560136 | 0,09  | 0,900611003 |
| Usp32    | 0,47  | 0,274586973 | 0,65  | 0,466238885 | 0,37  | 0,617626731 | -0,5  | 0,563779179 | 0,39  | 0,638780444 |
| Usp33    | -0,14 | 0,840882072 | 0,12  | 0,794404033 | 0,46  | 0,457740325 | -0,5  | 0,195855387 | -0,16 | 0,823098095 |
| Usp34    | -0,03 | 0,959985598 | 0,1   | 0,863912115 | -0,09 | 0,917694073 | -0,16 | 0,79260405  | -0,05 | 0,956610289 |
| Usp35    | 0,2   | 0,785400637 | -0,03 | 0,968437059 | -0,07 | 0,944441051 | 0,24  | 0,568480521 | -0,05 | 0,969617491 |
| Usp36    | -0,32 | 0,580610288 | 0     | 1           | 0,17  | 0,789969951 | 0,45  | 0,530766711 | 0,32  | 0,700875396 |
| Usp37    | -0,22 | 0,743485447 | -0,26 | 0,725783826 | 0,88  | 0,168170957 | -0,33 | 0,331911754 | -0,09 | 0,891375716 |
| Usp38    | -0,13 | 0,874467978 | -0,06 | 0,957627351 | 0,32  | 0,501053983 | 0,27  | 0,709570719 | 0,48  | 0,483068417 |
| Usp39    | 0,27  | 0,644174496 | -0,36 | 0,459417799 | 0,3   | 0,631612216 | 0,5   | 0,220646497 | -0,04 | 0,976840237 |
| Usp4     | -0,82 | 0,087125838 | -0,11 | 0,87095497  | 0,39  | 0,490489841 | -0,64 | 0,088393639 | -0,11 | 0,877669996 |
| Usp40    | -0,16 | 0,895278749 | -0,01 | 0,997700959 | -0,38 | 0,671466953 | -0,05 | 0,974454293 | -0,34 | 0,825272094 |
| Usp42    | -0,15 | 0,814905765 | 0,54  | 0,256702217 | -0,6  | 0,484661972 | 0,14  | 0,843949302 | 0,24  | 0,75695866  |
| Usp43    | -0,08 | 0,925510521 | -0,34 | 0,494666675 | 0,32  | 0,498419585 | -0,25 | 0,71158821  | -0,27 | 0,781220138 |
| Usp44    | 0,08  | 0,941218573 | 0,01  | 0,998513452 | -0,27 | 0,61190379  | -0,1  | 0,896599656 | 0     | 0,999791144 |
| Usp45    | -0,62 | 0,209811856 | -0,07 | 0,884434898 | 0,93  | 0,17378444  | 1,03  | 0,160438233 | -0,1  | 0,940092696 |
| Usp46    | -0,64 | 0,344302765 | 0,33  | 0,568282579 | 0,11  | 0,935438674 | 0,24  | 0,758588473 | -0,08 | 0,952686875 |
| Usp46os1 | 0,02  | 0,975949545 | 0,01  | 0,992175086 | -0,1  | 0,85952125  | -0,05 | 0,943143586 | 0,01  | 0,991559961 |
| Usp46os2 | 0,05  | 0,925510521 | -0,28 | 0,647475869 | 0,32  | 0,535437817 | 0,24  | 0,548775366 | 0,19  | 0,734725045 |

|        |       |             |       |             |       |             |       |             |       |             |
|--------|-------|-------------|-------|-------------|-------|-------------|-------|-------------|-------|-------------|
| Usp47  | -0,05 | 0,95491769  | 0,02  | 0,989260323 | 0,69  | 0,107994175 | 0,55  | 0,289597723 | 0     | 0,99981982  |
| Usp48  | -0,16 | 0,870052902 | -0,2  | 0,783879206 | 0,46  | 0,453446323 | -0,21 | 0,669410879 | 0,15  | 0,839474287 |
| Usp49  | 0,74  | 0,559760851 | 1,44  | 0,182771552 | 0,27  | 0,722775581 | -1,77 | 0,204791706 | 0,03  | 0,991559961 |
| Usp5   | -0,39 | 0,39231917  | -0,25 | 0,671319666 | -0,33 | 0,647006895 | 0,46  | 0,36184569  | -0,22 | 0,860292816 |
| Usp50  | -0,23 | 0,827442439 | 0,58  | 0,311963583 | -0,31 | 0,622546805 | -0,78 | 0,546274162 | -0,3  | 0,855632076 |
| Usp51  | -0,07 | 0,9231839   | 0,15  | 0,883843639 | -0,72 | 0,280580035 | -0,28 | 0,62296101  | -0,28 | 0,719233469 |
| Usp53  | -0,17 | 0,811859636 | 0,34  | 0,690272092 | 0,31  | 0,68845998  | -1,37 | 0,1122689   | 0,31  | 0,796586414 |
| Usp54  | -0,87 | 0,156998083 | -0,73 | 0,246996894 | 0,58  | 0,465949919 | -1,53 | 0,070595145 | -1,45 | 0,05100134  |
| Usp6nl | 0,18  | 0,800023642 | 0,33  | 0,523313205 | 0,78  | 0,548750983 | -0,68 | 0,168143396 | -0,33 | 0,678938588 |
| Usp7   | -0,17 | 0,722415783 | 0,09  | 0,887448685 | -0,19 | 0,834979811 | 0,17  | 0,733028982 | 0,11  | 0,880556628 |
| Usp8   | -0,05 | 0,9231839   | -0,09 | 0,935439333 | -0,53 | 0,471873683 | 0,25  | 0,671991774 | 0,28  | 0,705203579 |
| Usp9x  | -0,04 | 0,966775766 | 0,12  | 0,795638071 | 0,24  | 0,733423502 | 0,19  | 0,703281567 | 0,02  | 0,983469081 |
| Usp9y  | 0,37  | 0,602160482 | 0,35  | 0,678357594 | 0,12  | 0,886000685 | -0,12 | 0,87148686  | 0,02  | 0,985269236 |
| Uspl1  | -0,23 | 0,79498488  | -0,25 | 0,629493333 | 0,35  | 0,714376082 | 0,02  | 0,967866794 | -0,01 | 0,990610351 |
| Ust    | 0,23  | 0,824639882 | 0,46  | 0,483305197 | 0,32  | 0,811424918 | -0,01 | 0,987244151 | 0,61  | 0,615772692 |
| Utf1   | 0,27  | 0,806052344 | -0,3  | 0,531518093 | 0,05  | 0,963221639 | 0,02  | 0,966196518 | 0,35  | 0,73096179  |
| Utp11l | -0,12 | 0,892124736 | -0,18 | 0,801259805 | -0,18 | 0,777810365 | -0,24 | 0,584151489 | 0,19  | 0,762256548 |
| Utp14a | -0,06 | 0,953621667 | -0,29 | 0,796994306 | -0,06 | 0,968677508 | 0,61  | 0,496431317 | -0,08 | 0,958856121 |
| Utp14b | -0,5  | 0,673314315 | 0,56  | 0,801513852 | 0,89  | 0,565822909 | -1,1  | 0,441740032 | 0,54  | 0,720742956 |
| Utp15  | -0,91 | 0,189684245 | 0,28  | 0,654719935 | -0,04 | 0,977126842 | 0,6   | 0,259810388 | 0,32  | 0,650104155 |
| Utp18  | -0,28 | 0,665460488 | -0,05 | 0,970020205 | 0,07  | 0,966414094 | 0,74  | 0,131650622 | 0,78  | 0,111570414 |
| Utp20  | -0,72 | 0,148685247 | -0,57 | 0,353692234 | 0,36  | 0,633535699 | 1,21  | 0,146027384 | 0,11  | 0,930649939 |
| Utp23  | 0,61  | 0,178589155 | -0,07 | 0,969019461 | 0,51  | 0,543696688 | -0,2  | 0,599774385 | -0,34 | 0,639785525 |
| Utp3   | -0,25 | 0,556793286 | 0,12  | 0,775155136 | 0,34  | 0,549836783 | 0,11  | 0,777673386 | 0,3   | 0,551972106 |
| Utp6   | 0,28  | 0,742995005 | -0,61 | 0,4201554   | 0,86  | 0,197898931 | 0,65  | 0,35134637  | 0,28  | 0,792889876 |
| Utrn   | -0,26 | 0,464531121 | 0,02  | 0,979293032 | -0,02 | 0,990836784 | -1,28 | 0,036105091 | -0,37 | 0,54060764  |
| Uts2   | 0,32  | 0,490731724 | -0,12 | 0,884226482 | -0,07 | 0,935168506 | 0,22  | 0,673534755 | 0,07  | 0,947559952 |
| Uts2b  | 0,05  | 0,963914207 | 0,13  | 0,764491894 | 0,15  | 0,818696714 | -0,35 | 0,671346789 | -0,4  | 0,715879151 |
| Uts2r  | 0,07  | 0,922118639 | 0,25  | 0,564817526 | -0,03 | 0,968742139 | 0,21  | 0,650531076 | 0,25  | 0,745568459 |
| Uty    | 0,08  | 0,903666411 | 0,08  | 0,916042399 | -0,37 | 0,541816551 | -0,08 | 0,943143586 | 0,16  | 0,892349039 |
| Uvrag  | -0,15 | 0,811419663 | 0,16  | 0,75380926  | -0,39 | 0,475629395 | -0,1  | 0,877053477 | 0,34  | 0,58512161  |
| Uvssa  | -1,04 | 0,424529546 | 0,52  | 0,725076224 | 0,58  | 0,368620918 | -1,11 | 0,240621937 | -1,12 | 0,330057248 |
| Uxs1   | -0,2  | 0,767083571 | -0,25 | 0,770521007 | 0,17  | 0,831360311 | 0,08  | 0,918492221 | -0,2  | 0,774395978 |
| Uxt    | 0,04  | 0,957820843 | -0,1  | 0,881113709 | -0,13 | 0,906301115 | 0,58  | 0,221481521 | 0,23  | 0,708051749 |
| V1ra8  | 0,18  | 0,739833092 | 0     | 1           | 0,11  | 0,899387868 | 0,16  | 0,630514597 | 0,16  | 0,831446445 |

|          |       |             |       |             |       |             |       |             |       |             |
|----------|-------|-------------|-------|-------------|-------|-------------|-------|-------------|-------|-------------|
| V1rd18   | 0,49  | 0,468284568 | 0,26  | 0,557875295 | -0,28 | 0,598517413 | 0,07  | 0,912449153 | 0,05  | 0,962820357 |
| Vac14    | -0,42 | 0,556304196 | -0,15 | 0,786394409 | 0,27  | 0,656894717 | 0,45  | 0,592708932 | -0,4  | 0,664141521 |
| Vamp1    | -0,4  | 0,546019769 | -0,27 | 0,896581126 | 0,24  | 0,856218874 | -0,71 | 0,686514009 | 0,18  | 0,916837154 |
| Vamp2    | -0,42 | 0,446515613 | 0,16  | 0,758297568 | -0,17 | 0,733423502 | -0,24 | 0,698459607 | 0,13  | 0,885872093 |
| Vamp3    | 0,13  | 0,793616893 | 0,16  | 0,806866948 | -0,1  | 0,877366773 | 0,13  | 0,779547737 | 0,09  | 0,904684159 |
| Vamp4    | 0,47  | 0,523556522 | 0     | 1           | 0,12  | 0,941627748 | -0,4  | 0,710116369 | 0,45  | 0,747875132 |
| Vamp5    | -0,09 | 0,86572559  | 0,09  | 0,906777728 | -0,12 | 0,87140695  | -0,81 | 0,092516401 | 0,26  | 0,633381473 |
| Vamp7    | 0,21  | 0,690085958 | -0,1  | 0,933320126 | 0,15  | 0,880574524 | 0,93  | 0,110810902 | 0,34  | 0,708533352 |
| Vamp8    | 0,05  | 0,944291635 | 0,1   | 0,840275737 | 0,18  | 0,822852885 | -0,02 | 0,974813898 | 0,32  | 0,523861129 |
| Vangl1   | -0,17 | 0,766887753 | -0,49 | 0,391928422 | 0,4   | 0,599202081 | 0,13  | 0,921423877 | -0,1  | 0,950333151 |
| Vangl2   | -0,63 | 0,315801833 | -0,48 | 0,584191373 | 0,43  | 0,277277238 | 0,42  | 0,525409031 | -0,74 | 0,256989438 |
| Vapa     | -0,15 | 0,800990411 | -0,04 | 0,974159037 | 0,46  | 0,602775092 | 0,56  | 0,140538478 | 0,27  | 0,626176831 |
| Vapb     | -0,06 | 0,959985598 | -0,16 | 0,80970465  | 0,23  | 0,821593262 | 0,04  | 0,941093315 | -0,67 | 0,17964145  |
| Vars     | -0,31 | 0,555287219 | 0,2   | 0,677026666 | 0,14  | 0,854226893 | 1,07  | 0,031950799 | -0,28 | 0,633449435 |
| Vars2    | -0,96 | 0,079135571 | 0,26  | 0,792929643 | 0,59  | 0,418405756 | -0,19 | 0,764819621 | -0,92 | 0,05633712  |
| Vash1    | -1,08 | 0,049002071 | -0,39 | 0,475024915 | 1,08  | 0,093530523 | 3,42  | 0,006436174 | -0,68 | 0,224070009 |
| Vash2    | -0,26 | 0,69184055  | -0,1  | 0,899496232 | 0,96  | 0,184787884 | 0,49  | 0,604889831 | -0,07 | 0,95985938  |
| Vasn     | 0,46  | 0,214430522 | 0,05  | 0,959209847 | 1,11  | 0,059478617 | 0,34  | 0,747854799 | -0,29 | 0,744868254 |
| Vasp     | -0,29 | 0,654475039 | 0,08  | 0,89081665  | 0,16  | 0,867589536 | 0,89  | 0,040875837 | 0,07  | 0,937280132 |
| Vat1     | -0,12 | 0,80377975  | -0,42 | 0,362188015 | 0,46  | 0,37686469  | 0,54  | 0,125856673 | -0,56 | 0,193796626 |
| Vat1l    | -0,09 | 0,955836484 | -0,15 | 0,842663656 | -0,39 | 0,628048897 | 0,2   | 0,891204936 | 0,14  | 0,947657002 |
| Vaultrc5 | 0,54  | 0,242446083 | 0,16  | 0,896322235 | -0,41 | 0,658477739 | -0,83 | 0,136046497 | 0,13  | 0,913274952 |
| Vav1     | -0,05 | 0,932324918 | 0,08  | 0,93163271  | -0,21 | 0,798348773 | 0,56  | 0,152591813 | 0,57  | 0,426055761 |
| Vav2     | -0,67 | 0,196478065 | -0,42 | 0,370515616 | -0,19 | 0,77027744  | 1,25  | 0,074454367 | -0,35 | 0,701887274 |
| Vav3     | -0,28 | 0,631544171 | 0,13  | 0,905517116 | -0,44 | 0,668633375 | -0,72 | 0,068401155 | -0,39 | 0,420470441 |
| Vax1     | -0,05 | 0,966775766 | -0,02 | 0,989036108 | -0,08 | 0,927538596 | -0,21 | 0,594135493 | 0,27  | 0,759233513 |
| Vax2     | 0,06  | 0,940936429 | -0,01 | 0,994802028 | -0,01 | 0,993379272 | 0,2   | 0,699348716 | 0,18  | 0,773503402 |
| Vax2os   | -0,22 | 0,639346687 | 0,07  | 0,920894784 | -0,06 | 0,921817943 | -0,16 | 0,728293649 | -0,1  | 0,912478587 |
| Vbp1     | 0,01  | 0,996401897 | -0,15 | 0,932390453 | 0,38  | 0,630805418 | 0,68  | 0,385593155 | 0,72  | 0,541137006 |
| Vcam1    | 1,32  | 0,217479741 | 1,45  | 0,12411466  | -1,35 | 0,017748885 | -0,24 | 0,694452175 | 1,78  | 0,004582818 |
| Vcan     | 1,34  | 0,13473547  | 1,75  | 0,205273528 | 0     | 0,997581017 | 2,48  | 0,070439035 | 0,45  | 0,795033998 |
| Vcl      | -0,35 | 0,355118268 | 0,14  | 0,732847182 | -0,01 | 0,989772079 | 0,57  | 0,188526724 | -0,35 | 0,608957273 |
| Vcp      | -0,31 | 0,416909288 | -0,21 | 0,766425161 | 0,44  | 0,540576838 | 0,98  | 0,031574061 | 0,22  | 0,728530603 |
| Vcpip1   | 0,04  | 0,932155394 | 0,8   | 0,104971247 | -0,35 | 0,476804224 | 0,41  | 0,357560472 | 0,72  | 0,119306657 |
| Vcpcmt   | 0,26  | 0,90799109  | -1,19 | 0,087435995 | 0,32  | 0,906678445 | 2     | 0,086452922 | 0,37  | 0,89044341  |

|          |       |             |       |             |       |             |       |             |       |             |
|----------|-------|-------------|-------|-------------|-------|-------------|-------|-------------|-------|-------------|
| Vdac1    | 0,18  | 0,701391957 | 0,34  | 0,605851161 | 0,57  | 0,46668176  | 1,03  | 0,183217579 | 0,21  | 0,875434819 |
| Vdac2    | -0,28 | 0,597519827 | -0,02 | 0,981415366 | -0,08 | 0,923350407 | 0,63  | 0,458051971 | 0,39  | 0,700875396 |
| Vdac3    | -0,13 | 0,813304253 | -0,25 | 0,689957982 | -0,15 | 0,911634383 | 0,01  | 0,992365775 | 0,06  | 0,958975954 |
| Vdr      | 0,98  | 0,111767257 | 0,05  | 0,925569254 | 0,65  | 0,238291911 | -1,33 | 0,081747651 | -1,31 | 0,206819215 |
| Vegfa    | 1,32  | 0,130391477 | 0,8   | 0,544440118 | 0,1   | 0,915671966 | -2,65 | 0,007919254 | -0,14 | 0,876714296 |
| Vegfb    | 0,03  | 0,962030279 | -0,08 | 0,930849936 | -0,01 | 0,996260936 | -0,35 | 0,428295778 | -0,33 | 0,528661994 |
| Vegfc    | 0,16  | 0,753482572 | 0,57  | 0,418712141 | 0,43  | 0,659694447 | -1,1  | 0,039715403 | -0,26 | 0,675282484 |
| Vephl    | -0,1  | 0,853515273 | -0,14 | 0,793603525 | -0,31 | 0,501664412 | -0,33 | 0,632440348 | -0,07 | 0,952656556 |
| Vezi1    | -0,02 | 0,978501161 | 0,08  | 0,85141132  | 0,21  | 0,82162081  | -0,78 | 0,037302258 | 0,08  | 0,914498972 |
| Vezi2    | -0,57 | 0,223226436 | 0,4   | 0,488525923 | 0,33  | 0,483761569 | -0,43 | 0,352630383 | -0,18 | 0,808178104 |
| Vgf      | -0,35 | 0,613990129 | -0,38 | 0,602506767 | 0,27  | 0,602319645 | 0,44  | 0,296784007 | -0,03 | 0,97425848  |
| Vgll1    | 0,05  | 0,942661036 | 0,01  | 0,993789602 | -0,21 | 0,809137779 | 0,16  | 0,759473443 | -0,19 | 0,830268209 |
| Vgll2    | -0,2  | 0,686916378 | 0,59  | 0,505731706 | -0,32 | 0,602259493 | -0,41 | 0,469378969 | 0,16  | 0,864373858 |
| Vgll3    | 0,2   | 0,62130248  | -0,14 | 0,832841509 | 0,17  | 0,859411859 | 0,03  | 0,962670023 | 0,15  | 0,807620467 |
| Vgll4    | 0,13  | 0,806869659 | -0,17 | 0,647569143 | 0,3   | 0,541560473 | 0,11  | 0,757725211 | -0,56 | 0,292707282 |
| Vhl      | 0     | 0,99882685  | 0,09  | 0,892727342 | 0,44  | 0,548288344 | -0,11 | 0,815377513 | -0,67 | 0,45155383  |
| Vil1     | -0,62 | 0,571404655 | -0,21 | 0,880892852 | 0,12  | 0,886920133 | -0,33 | 0,699020163 | -0,16 | 0,865258929 |
| Vill     | -0,1  | 0,922118639 | 0,19  | 0,804311994 | 1,16  | 0,012844221 | -0,51 | 0,313316285 | -0,56 | 0,378847663 |
| Vim      | -0,35 | 0,325246268 | -0,06 | 0,922588722 | 0,36  | 0,394340089 | 1,48  | 0,024040886 | -0,17 | 0,85508146  |
| Vimp     | 0,16  | 0,795659022 | -0,11 | 0,887448685 | 0,15  | 0,877714146 | 1,11  | 0,076348362 | 0,69  | 0,220768726 |
| Vip      | 0,23  | 0,707480624 | 0,2   | 0,910184435 | 0,69  | 0,569619692 | 0,43  | 0,692483691 | 0,2   | 0,919867638 |
| Vipas39  | -0,54 | 0,557802791 | -0,28 | 0,548847572 | -0,44 | 0,501664412 | 0,55  | 0,42551403  | 0,14  | 0,898309858 |
| Vipr1    | -0,15 | 0,840515514 | -0,22 | 0,742218653 | -0,21 | 0,821418477 | -0,13 | 0,824118176 | -0,41 | 0,530072156 |
| Vipr2    | -0,39 | 0,757239936 | -0,31 | 0,790939978 | -0,04 | 0,9617386   | -0,31 | 0,790653255 | -0,27 | 0,846526184 |
| Vit      | 0,53  | 0,296031134 | 0,21  | 0,666450149 | -0,16 | 0,851593229 | -0,06 | 0,944802384 | -0,06 | 0,967545266 |
| Vkorc1   | 0,05  | 0,932654105 | -0,2  | 0,753920808 | 0,35  | 0,660920525 | -0,07 | 0,907485612 | -0,36 | 0,525188239 |
| Vkorc1l1 | -0,77 | 0,207875051 | -0,19 | 0,792112243 | 0,35  | 0,530404705 | 0,51  | 0,302214149 | -0,03 | 0,980961333 |
| Vldlr    | -0,23 | 0,832798869 | 0,08  | 0,923044405 | -0,38 | 0,76031147  | -0,03 | 0,979039536 | 0,3   | 0,797293554 |
| Vma21    | -0,66 | 0,235549559 | 0,51  | 0,450538273 | 0,24  | 0,831266864 | 0,27  | 0,715821479 | -0,39 | 0,465535486 |
| Vmac     | 0,37  | 0,54401985  | 0,22  | 0,845833295 | 0,12  | 0,938291859 | -0,35 | 0,627125745 | 0,31  | 0,719430166 |
| Vmn1r1   | 0,08  | 0,864526424 | -0,04 | 0,9381453   | -0,22 | 0,689847701 | -0,08 | 0,899003207 | -0,02 | 0,990633766 |
| Vmn1r10  | 0,08  | 0,882595596 | 0,02  | 0,977587409 | -0,11 | 0,865148119 | 0,01  | 0,988205241 | -0,02 | 0,979392852 |
| Vmn1r103 | 0,22  | 0,722348441 | -0,14 | 0,88483892  | -0,96 | 0,162456758 | 0,76  | 0,115380139 | 0,06  | 0,942935749 |
| Vmn1r11  | -0,03 | 0,966775766 | 0,13  | 0,796206036 | 0,05  | 0,941514253 | -0,05 | 0,955666315 | -0,05 | 0,973506731 |
| Vmn1r113 | 0,69  | 0,470455626 | -0,01 | 0,99687092  | -0,12 | 0,871149274 | 0,01  | 0,990388217 | -0,1  | 0,913274952 |



|          |       |             |       |             |       |             |       |             |       |             |
|----------|-------|-------------|-------|-------------|-------|-------------|-------|-------------|-------|-------------|
| Vmn1r115 | 0,34  | 0,561590064 | 0,09  | 0,87190125  | -0,24 | 0,705727576 | 0,03  | 0,949239972 | 0,02  | 0,981913783 |
| Vmn1r116 | -0,01 | 0,987242447 | 0     | 1           | -0,09 | 0,932866273 | 0,21  | 0,795196848 | 0,95  | 0,211308904 |
| Vmn1r119 | 0,24  | 0,59141369  | 0,14  | 0,777979675 | -0,1  | 0,897932497 | -0,02 | 0,965983604 | 0,08  | 0,92519473  |
| Vmn1r12  | 0,04  | 0,950532575 | -0,02 | 0,964757836 | -0,07 | 0,922318683 | -0,05 | 0,936279921 | 0     | 0,998444219 |
| Vmn1r120 | -0,18 | 0,734622176 | 0,04  | 0,940752425 | -0,12 | 0,885042765 | 0,24  | 0,753242411 | -0,14 | 0,896310407 |
| Vmn1r121 | -0,01 | 0,996219097 | 0,08  | 0,88741189  | -0,14 | 0,786634846 | -0,04 | 0,921036173 | -0,28 | 0,573801069 |
| Vmn1r122 | 0,2   | 0,654203085 | 0,16  | 0,717942902 | -0,5  | 0,467503988 | -0,07 | 0,880043745 | 0,14  | 0,814726639 |
| Vmn1r123 | 0,02  | 0,97300035  | 0,26  | 0,668839557 | 0,08  | 0,895434884 | -0,06 | 0,883821307 | -0,1  | 0,879072575 |
| Vmn1r124 | 0,16  | 0,747211305 | 0,19  | 0,768690422 | -0,18 | 0,766119437 | -0,06 | 0,881406072 | -0,12 | 0,86493772  |
| Vmn1r125 | -0,03 | 0,954349573 | 0,01  | 0,996259587 | 0,09  | 0,882540073 | 0,04  | 0,932315462 | -0,02 | 0,983886537 |
| Vmn1r127 | 0,2   | 0,803737003 | 0,25  | 0,630915338 | -0,56 | 0,370554673 | -0,25 | 0,678469783 | 0,09  | 0,956610289 |
| Vmn1r128 | -0,16 | 0,775236271 | 0,11  | 0,882931058 | -0,1  | 0,867543859 | -0,12 | 0,740451724 | -0,08 | 0,909363599 |
| Vmn1r129 | 0,38  | 0,760872819 | 0     | 0,997700959 | -0,55 | 0,546857162 | -1,13 | 0,499022095 | -1,25 | 0,447019099 |
| Vmn1r13  | 0,03  | 0,972720447 | 0,31  | 0,559577499 | 0,16  | 0,79007666  | -0,01 | 0,994512187 | -0,28 | 0,72393858  |
| Vmn1r132 | -0,22 | 0,680520303 | 0,01  | 0,996341424 | 0,7   | 0,37970041  | -0,29 | 0,655842156 | -0,18 | 0,761594239 |
| Vmn1r14  | 0,63  | 0,695218128 | 0,06  | 0,951768918 | -0,04 | 0,953456022 | 0,27  | 0,668235059 | 1     | 0,186064144 |
| Vmn1r143 | 0,25  | 0,675149694 | 0,15  | 0,792112243 | 0,1   | 0,865822154 | -0,23 | 0,823146103 | -0,02 | 0,990091016 |
| Vmn1r148 | 0,22  | 0,615064142 | 0,1   | 0,901000778 | -0,45 | 0,435916963 | -0,04 | 0,945195883 | -0,19 | 0,895118675 |
| Vmn1r149 | 0,17  | 0,816357053 | 0,12  | 0,878066294 | -0,04 | 0,970939073 | 0     | 1           | 0,1   | 0,905758282 |
| Vmn1r15  | -0,12 | 0,827055517 | -0,04 | 0,947107147 | 0,11  | 0,88340482  | 0,09  | 0,807489629 | 0,17  | 0,765342998 |
| Vmn1r157 | 0,33  | 0,715991706 | 0,19  | 0,746843431 | -0,08 | 0,912772955 | -0,39 | 0,588755637 | 0,45  | 0,583535515 |
| Vmn1r158 | 0,22  | 0,739833092 | -0,22 | 0,697354745 | -0,28 | 0,688187934 | 0,28  | 0,533818852 | 0,3   | 0,677838252 |
| Vmn1r159 | 0,88  | 0,242446083 | 0,74  | 0,138101221 | -1,21 | 0,068894819 | 0,22  | 0,593856968 | 1,36  | 0,015349051 |
| Vmn1r16  | 0,05  | 0,931976704 | 0,29  | 0,643955364 | -0,02 | 0,984407511 | 0,19  | 0,627089222 | 0,25  | 0,635612479 |
| Vmn1r160 | 0,33  | 0,434364009 | -0,04 | 0,949201983 | 0,2   | 0,690924502 | -0,31 | 0,699520594 | -0,56 | 0,499989818 |
| Vmn1r167 | 0,11  | 0,820023436 | 0,07  | 0,886286684 | 0,11  | 0,845651772 | -0,06 | 0,921584021 | -0,05 | 0,953297732 |
| Vmn1r168 | 0,56  | 0,401159049 | -0,04 | 0,945143056 | -0,2  | 0,662322838 | 0,17  | 0,722766722 | -0,14 | 0,818825401 |
| Vmn1r169 | 0,26  | 0,620655916 | -0,26 | 0,616204398 | 0,03  | 0,973641476 | 0,18  | 0,807101657 | 0,31  | 0,785640104 |
| Vmn1r17  | -0,24 | 0,708528261 | -0,03 | 0,955204677 | 0,05  | 0,944361294 | -0,14 | 0,68585056  | -0,1  | 0,885986069 |
| Vmn1r170 | -0,05 | 0,926316023 | 0,06  | 0,904258936 | -0,07 | 0,911921787 | 0,09  | 0,810891431 | -0,24 | 0,763277172 |
| Vmn1r171 | -0,1  | 0,849751597 | -0,13 | 0,794404033 | 0,04  | 0,95136091  | 0,19  | 0,728730534 | 0,24  | 0,777307101 |
| Vmn1r174 | 0,03  | 0,95538722  | -0,1  | 0,87892334  | -0,31 | 0,534543192 | 0,11  | 0,781338312 | -0,13 | 0,860058375 |
| Vmn1r175 | 0,52  | 0,42935185  | -0,09 | 0,844425286 | 0,55  | 0,602259493 | 0,27  | 0,560447427 | -0,11 | 0,871329314 |
| Vmn1r176 | 0,14  | 0,806884829 | -0,08 | 0,880362561 | 0,04  | 0,956894731 | 0,03  | 0,937079845 | -0,09 | 0,899196564 |
| Vmn1r177 | 0,21  | 0,675149694 | -0,19 | 0,703401105 | -0,15 | 0,800107725 | 0,02  | 0,982212444 | -0,07 | 0,940878193 |

|             |       |             |       |             |       |             |       |             |       |             |
|-------------|-------|-------------|-------|-------------|-------|-------------|-------|-------------|-------|-------------|
| Vmn1r178    | -0,02 | 0,981308673 | -0,09 | 0,859223551 | -0,04 | 0,95106142  | -0,01 | 0,978135806 | 0,1   | 0,88321585  |
| Vmn1r179    | -0,01 | 0,993735766 | -0,27 | 0,470112519 | -0,09 | 0,894441229 | 0,38  | 0,35953164  | -0,21 | 0,702402249 |
| Vmn1r18     | 0,06  | 0,938204779 | -0,41 | 0,61193546  | -0,06 | 0,949192864 | -0,1  | 0,915691108 | -0,01 | 0,997106233 |
| Vmn1r180    | 0,16  | 0,827441872 | -0,09 | 0,95885009  | -0,26 | 0,778707372 | -0,27 | 0,81096279  | -0,06 | 0,971719739 |
| Vmn1r181    | -0,31 | 0,565823399 | 0,09  | 0,939215878 | -0,04 | 0,950846671 | 0,22  | 0,631934349 | -0,34 | 0,521841588 |
| Vmn1r183    | 0,27  | 0,584287872 | 0,08  | 0,855187815 | -0,4  | 0,649733839 | 0,21  | 0,637157307 | -0,08 | 0,917844354 |
| Vmn1r184    | 0,28  | 0,589442341 | -0,16 | 0,771523338 | -0,43 | 0,35180566  | 0,18  | 0,713435933 | 0,2   | 0,799510708 |
| Vmn1r185    | 0,13  | 0,749658322 | 0,27  | 0,832117565 | 0,08  | 0,915598278 | 0,21  | 0,810172317 | -0,02 | 0,983613958 |
| Vmn1r188    | -0,12 | 0,859664969 | -0,12 | 0,842793123 | -0,04 | 0,96858449  | -0,02 | 0,960547981 | 0,29  | 0,545867782 |
| Vmn1r189    | 0,18  | 0,747910979 | -0,03 | 0,979002922 | 0,12  | 0,865545635 | -0,14 | 0,732505868 | -0,03 | 0,980961333 |
| Vmn1r19     | 0,03  | 0,969949459 | -0,02 | 0,994351904 | 0,04  | 0,973732268 | 0,06  | 0,923055132 | 0,11  | 0,885872093 |
| Vmn1r191    | 0,4   | 0,311022075 | -0,14 | 0,811472247 | -0,15 | 0,751758339 | 0,04  | 0,921731995 | 0,14  | 0,829444633 |
| Vmn1r192    | -0,07 | 0,888962766 | 0,05  | 0,909975293 | 0,11  | 0,867571963 | -0,08 | 0,839567244 | 0,04  | 0,961406182 |
| Vmn1r193    | 0,2   | 0,722474851 | 0,04  | 0,940852764 | -0,2  | 0,725191296 | 0,12  | 0,818216797 | 0,07  | 0,940878193 |
| Vmn1r194    | -0,16 | 0,701627731 | -0,07 | 0,907186434 | -0,1  | 0,873980509 | -0,03 | 0,939706372 | -0,24 | 0,67134429  |
| Vmn1r195    | 0,34  | 0,476595145 | -0,69 | 0,619756114 | -0,14 | 0,782022139 | -0,13 | 0,899892355 | -0,25 | 0,823191628 |
| Vmn1r196    | 0,13  | 0,777335496 | 0,07  | 0,881574142 | -0,19 | 0,71593256  | -0,04 | 0,913170886 | 0,08  | 0,916139921 |
| Vmn1r197    | 0,25  | 0,66609472  | -0,27 | 0,536246395 | -0,03 | 0,969928932 | 0,21  | 0,530723335 | 0,1   | 0,899196564 |
| Vmn1r198    | 0     | 0,995658455 | -0,12 | 0,80097084  | -0,15 | 0,762462025 | 0,04  | 0,940734733 | -0,13 | 0,84970727  |
| Vmn1r199    | -0,23 | 0,66331039  | 0,25  | 0,774089094 | -0,1  | 0,882993082 | -0,24 | 0,551681549 | 0,09  | 0,925858284 |
| Vmn1r2      | 0,23  | 0,718996404 | -0,04 | 0,930192503 | -0,43 | 0,475398917 | 0,28  | 0,499384622 | 0,21  | 0,780906047 |
| Vmn1r20     | 0,35  | 0,797113928 | -0,01 | 0,995205602 | -0,61 | 0,346143883 | 0,17  | 0,864633859 | -0,06 | 0,966951657 |
| Vmn1r200    | -0,17 | 0,661975134 | 0,07  | 0,903595287 | 0,11  | 0,827067584 | -0,03 | 0,962290391 | 0,41  | 0,764656525 |
| Vmn1r201    | 0,15  | 0,792328154 | 0,13  | 0,801259805 | -0,02 | 0,979822436 | -0,15 | 0,680497621 | -0,04 | 0,969617491 |
| Vmn1r202    | 0,01  | 0,996426171 | 0,02  | 0,977071702 | 0,03  | 0,968862748 | -0,06 | 0,912109446 | -0,11 | 0,899870137 |
| Vmn1r203    | 0,09  | 0,859451324 | 0,11  | 0,849511429 | -0,02 | 0,978255748 | 0,07  | 0,891773132 | 0,11  | 0,874699689 |
| Vmn1r204    | -0,03 | 0,96263856  | 0,02  | 0,978528738 | 0,04  | 0,953951069 | -0,15 | 0,730351442 | 0,07  | 0,940092696 |
| Vmn1r205    | 0,24  | 0,616638675 | -0,18 | 0,707071624 | -0,09 | 0,880706627 | 0,04  | 0,921186059 | -0,11 | 0,869148467 |
| Vmn1r206    | 0,55  | 0,423395139 | 0,09  | 0,889696475 | -0,02 | 0,986800862 | 0,07  | 0,943864463 | 0,28  | 0,742080065 |
| Vmn1r207-ps | 0,11  | 0,820004812 | 0,01  | 0,995123842 | -0,19 | 0,782182029 | -0,16 | 0,676010477 | -0,04 | 0,962820357 |
| Vmn1r208    | -0,12 | 0,846313357 | 0,14  | 0,816344828 | 0,02  | 0,992510518 | 0,1   | 0,87048472  | 0,51  | 0,595497964 |
| Vmn1r209    | 0,14  | 0,733583213 | 0,09  | 0,848912129 | -0,27 | 0,540576838 | 0,08  | 0,846098872 | 0,02  | 0,981913783 |
| Vmn1r21     | 0,05  | 0,944722622 | 0,5   | 0,606999442 | 0,04  | 0,963199274 | -0,24 | 0,723460553 | -0,07 | 0,951125195 |
| Vmn1r210    | -0,02 | 0,980913066 | 0,46  | 0,746439988 | -0,06 | 0,941627748 | -0,08 | 0,905468987 | 0,18  | 0,7983507   |
| Vmn1r211    | 0,01  | 0,986470463 | -0,15 | 0,926157704 | -0,26 | 0,555082225 | -0,2  | 0,593856968 | -0,04 | 0,966951657 |

|          |       |             |       |             |       |             |       |             |       |             |
|----------|-------|-------------|-------|-------------|-------|-------------|-------|-------------|-------|-------------|
| Vmn1r212 | -0,01 | 0,987134449 | -0,28 | 0,752804236 | 0     | 0,998315898 | 0,11  | 0,737820092 | 0,21  | 0,735152891 |
| Vmn1r213 | 0,11  | 0,815205811 | -0,1  | 0,825162812 | -0,23 | 0,775290551 | 0,03  | 0,958172386 | 0,15  | 0,825871709 |
| Vmn1r214 | -0,02 | 0,985279076 | 0,38  | 0,76677473  | 0,14  | 0,861307315 | -0,17 | 0,762561024 | -0,47 | 0,370187845 |
| Vmn1r215 | -0,05 | 0,922118639 | -0,06 | 0,932292974 | -0,01 | 0,990699622 | -0,01 | 0,981754717 | -0,05 | 0,976743304 |
| Vmn1r216 | 0,03  | 0,964124037 | 0,22  | 0,697811585 | -0,05 | 0,940213182 | -0,17 | 0,6447962   | -0,23 | 0,666758661 |
| Vmn1r217 | -0,23 | 0,596550801 | 0,02  | 0,966717367 | -0,04 | 0,952019801 | 0     | 1           | 0,04  | 0,966951657 |
| Vmn1r218 | 0,03  | 0,955200574 | -0,05 | 0,912535732 | 0     | 0,999931921 | -0,01 | 0,989791016 | 0,36  | 0,439301508 |
| Vmn1r219 | 0,1   | 0,83227597  | 0,18  | 0,791642883 | -0,09 | 0,947217648 | -0,05 | 0,910298592 | 0,11  | 0,88762419  |
| Vmn1r22  | -0,04 | 0,950532575 | 0,03  | 0,95429671  | -0,03 | 0,97260511  | -0,1  | 0,79260405  | 0,28  | 0,71579227  |
| Vmn1r220 | -0,08 | 0,882060783 | -0,26 | 0,618450333 | 0,25  | 0,736310979 | 0,4   | 0,217079936 | 0,23  | 0,673120647 |
| Vmn1r221 | 0,11  | 0,829299665 | 0,09  | 0,897811179 | -0,04 | 0,973802765 | -0,21 | 0,534171194 | -0,27 | 0,671145344 |
| Vmn1r222 | 0,13  | 0,820821561 | -0,21 | 0,758932518 | -0,1  | 0,901410016 | -0,17 | 0,819184097 | -0,12 | 0,918288793 |
| Vmn1r223 | -0,01 | 0,995165528 | -0,01 | 0,98459889  | 0,08  | 0,908390194 | 0,02  | 0,973328764 | -0,3  | 0,627145497 |
| Vmn1r224 | 0     | 0,998769353 | 0,09  | 0,854580121 | 0     | 0,997268369 | -0,07 | 0,853963723 | 0,13  | 0,865258929 |
| Vmn1r225 | 0,11  | 0,84900712  | -0,14 | 0,836988617 | 0     | 0,998779926 | 0,18  | 0,647770751 | 0,14  | 0,871038748 |
| Vmn1r226 | 0,02  | 0,971963261 | 0,03  | 0,946885634 | -0,23 | 0,663029337 | 0,03  | 0,938689944 | -0,05 | 0,948935854 |
| Vmn1r227 | -0,06 | 0,902591179 | 0     | 0,998504901 | 0,09  | 0,922318683 | 0,12  | 0,747830911 | 0,19  | 0,731897025 |
| Vmn1r228 | 0,31  | 0,628802144 | 0,13  | 0,794404033 | -0,2  | 0,702677589 | -0,1  | 0,872512015 | 0,03  | 0,973428839 |
| Vmn1r229 | -0,41 | 0,280499699 | 0,02  | 0,980309105 | 0,14  | 0,814956693 | -0,23 | 0,607090688 | 0,25  | 0,662029815 |
| Vmn1r23  | -0,04 | 0,937251448 | 0     | 1           | -0,05 | 0,963199274 | -0,14 | 0,698362346 | -0,22 | 0,699060093 |
| Vmn1r230 | -0,05 | 0,928103232 | 0,09  | 0,909079807 | 0,12  | 0,842919139 | 0     | 0,999753096 | -0,1  | 0,913274952 |
| Vmn1r231 | -0,3  | 0,631796741 | 0,12  | 0,794259612 | 0     | 0,997268369 | -0,06 | 0,891939768 | 0,15  | 0,821727352 |
| Vmn1r232 | 0,17  | 0,803737003 | 0,07  | 0,938991098 | -0,21 | 0,702677589 | 0,02  | 0,970165633 | -0,59 | 0,318374272 |
| Vmn1r233 | -0,03 | 0,965116762 | 0,04  | 0,947107147 | 0,04  | 0,957904357 | -0,03 | 0,947809027 | 0,04  | 0,964102498 |
| Vmn1r234 | 0,05  | 0,931340184 | -0,01 | 0,994879351 | -0,13 | 0,859456057 | -0,05 | 0,925025576 | 0,11  | 0,86809582  |
| Vmn1r235 | 0,36  | 0,408267856 | 0,03  | 0,946885634 | -0,02 | 0,985347628 | 0     | 1           | 0,06  | 0,940092696 |
| Vmn1r236 | 0,07  | 0,895278749 | -0,17 | 0,702154437 | 0     | 0,997581017 | 0,05  | 0,942739047 | -0,27 | 0,68987325  |
| Vmn1r237 | 0,13  | 0,733471786 | 0,05  | 0,932292974 | 0,06  | 0,92145606  | -0,27 | 0,503735127 | -0,19 | 0,786084304 |
| Vmn1r238 | 0,34  | 0,474293292 | -0,03 | 0,944172549 | 0,06  | 0,954453764 | -0,14 | 0,66020673  | 0,27  | 0,745134899 |
| Vmn1r24  | -0,06 | 0,89546421  | 0,31  | 0,716668427 | -0,24 | 0,752157341 | -0,55 | 0,203937011 | 0,06  | 0,97203071  |
| Vmn1r25  | 0,33  | 0,608742569 | -0,12 | 0,806715517 | -0,35 | 0,686287078 | 0,35  | 0,433670101 | 0,21  | 0,82482852  |
| Vmn1r26  | 0,14  | 0,778850365 | 0,16  | 0,823530278 | 0,09  | 0,922971065 | 0,05  | 0,921032395 | -0,11 | 0,871038748 |
| Vmn1r27  | 0,67  | 0,292713469 | 0     | 1           | -0,24 | 0,691268573 | -0,34 | 0,716994919 | 0,15  | 0,920355527 |
| Vmn1r28  | -0,05 | 0,950532575 | 0,18  | 0,813541606 | -0,02 | 0,975866042 | -0,38 | 0,425029495 | -0,16 | 0,811321326 |
| Vmn1r29  | -0,01 | 0,991919022 | 0,19  | 0,656204868 | 0,26  | 0,630056981 | -0,13 | 0,709570719 | 0,08  | 0,918288793 |

|         |       |             |       |             |       |             |       |             |       |             |
|---------|-------|-------------|-------|-------------|-------|-------------|-------|-------------|-------|-------------|
| Vmn1r3  | 0,16  | 0,764824121 | 0,22  | 0,640299669 | -0,21 | 0,652112262 | 0     | 1           | 0,2   | 0,763240477 |
| Vmn1r30 | 0,32  | 0,465168175 | -0,21 | 0,786394409 | -0,03 | 0,978012085 | -0,46 | 0,600327117 | 0,57  | 0,73486361  |
| Vmn1r31 | 0,17  | 0,676906193 | 0,01  | 0,996259587 | -0,24 | 0,638614862 | 0     | 1           | 0,18  | 0,787304651 |
| Vmn1r32 | -0,03 | 0,963914207 | 0,07  | 0,929289366 | 0,32  | 0,581392512 | 0,12  | 0,873812847 | 0,2   | 0,860591136 |
| Vmn1r33 | 0,88  | 0,388392471 | 0,19  | 0,786394409 | 0,21  | 0,654328013 | -0,03 | 0,968422534 | -0,36 | 0,539165219 |
| Vmn1r34 | 0,13  | 0,80309313  | 0     | 1           | 0,13  | 0,833493578 | 0,01  | 0,986768223 | -0,1  | 0,910301996 |
| Vmn1r35 | -0,08 | 0,915575695 | 0,38  | 0,373555617 | -0,16 | 0,770526999 | -0,12 | 0,816053567 | -0,24 | 0,734042268 |
| Vmn1r36 | 0,47  | 0,455001921 | 0,23  | 0,673542391 | -0,37 | 0,59595639  | -0,18 | 0,805452009 | 0,07  | 0,953744167 |
| Vmn1r37 | 0,01  | 0,989349635 | -0,12 | 0,856881728 | -0,05 | 0,95204022  | 0,12  | 0,758588473 | 0,23  | 0,709995567 |
| Vmn1r38 | -0,05 | 0,935140077 | 0,02  | 0,969019461 | -0,08 | 0,900945102 | -0,04 | 0,915119168 | -0,14 | 0,854369491 |
| Vmn1r39 | 0,06  | 0,922118639 | 0,11  | 0,810875398 | 0,12  | 0,868054401 | -0,17 | 0,694362194 | 0,13  | 0,850520145 |
| Vmn1r4  | 0,12  | 0,845591898 | 0,14  | 0,82485467  | 0,02  | 0,976138805 | 0,15  | 0,702496496 | 0,05  | 0,961406182 |
| Vmn1r40 | 0,03  | 0,953868772 | -0,09 | 0,853569707 | 0     | 0,999571656 | 0     | 1           | -0,1  | 0,885872093 |
| Vmn1r41 | 0,14  | 0,810208393 | -0,02 | 0,97657246  | -0,11 | 0,896854446 | 0     | 0,997598211 | -0,05 | 0,959398085 |
| Vmn1r42 | -0,03 | 0,965116762 | 0,24  | 0,572692182 | -0,02 | 0,976138805 | -0,05 | 0,914828446 | -0,25 | 0,686467526 |
| Vmn1r43 | 0,33  | 0,673291416 | 0,16  | 0,912604822 | -0,53 | 0,497205965 | 0,23  | 0,639359737 | 0,08  | 0,933759514 |
| Vmn1r44 | -0,01 | 0,990352291 | 0     | 0,998754213 | -0,06 | 0,935978536 | -0,13 | 0,875988768 | 0,02  | 0,983713871 |
| Vmn1r45 | 0,42  | 0,58675329  | -0,12 | 0,766425161 | -0,13 | 0,845993227 | 0,24  | 0,559599448 | -0,05 | 0,959573673 |
| Vmn1r46 | 0,04  | 0,945980486 | -0,16 | 0,790350061 | -0,31 | 0,527929204 | 0,35  | 0,513757118 | 0,45  | 0,513776994 |
| Vmn1r47 | 0,26  | 0,561643132 | 0,26  | 0,602129681 | -0,1  | 0,898684568 | -0,18 | 0,690659674 | -0,06 | 0,950267521 |
| Vmn1r48 | 0     | 0,999041198 | -0,17 | 0,706671369 | -0,16 | 0,763484901 | 0,2   | 0,712115859 | -0,33 | 0,650245555 |
| Vmn1r49 | 0,24  | 0,639039342 | -0,29 | 0,49252156  | -0,08 | 0,907353858 | 0,07  | 0,878455911 | 0,09  | 0,911561712 |
| Vmn1r5  | -0,05 | 0,927051853 | 0,1   | 0,933767558 | -0,28 | 0,51912977  | 0,14  | 0,753507011 | -0,01 | 0,993293923 |
| Vmn1r50 | 0,27  | 0,619750703 | -0,12 | 0,800986193 | -0,15 | 0,801888549 | -0,29 | 0,507570518 | -0,33 | 0,715721584 |
| Vmn1r51 | 0,05  | 0,951885977 | 0,02  | 0,996113371 | -0,13 | 0,891510964 | -0,67 | 0,459037624 | -0,58 | 0,613836622 |
| Vmn1r52 | 0,25  | 0,554519131 | -0,24 | 0,619501651 | 0,14  | 0,780601987 | 0,09  | 0,837974367 | 0,14  | 0,829834904 |
| Vmn1r53 | 0,1   | 0,850491134 | 0,06  | 0,906234611 | -0,23 | 0,653810439 | -0,16 | 0,726241914 | 0,2   | 0,764656525 |
| Vmn1r54 | 0,02  | 0,969577981 | -0,04 | 0,933320126 | -0,25 | 0,564103482 | 0     | 1           | 0,04  | 0,968130547 |
| Vmn1r56 | 0,35  | 0,421378808 | -0,07 | 0,928780248 | 0,21  | 0,69775501  | -0,09 | 0,846179094 | 0,36  | 0,492198964 |
| Vmn1r57 | -0,19 | 0,673291416 | -0,12 | 0,811280211 | 0,08  | 0,918291931 | 0,12  | 0,766936722 | 0,2   | 0,764124978 |
| Vmn1r58 | -0,08 | 0,902861556 | -0,46 | 0,615733281 | 0,06  | 0,940489823 | 0     | 0,998810504 | 0,36  | 0,644533534 |
| Vmn1r59 | 0     | 0,996998625 | -0,23 | 0,541301427 | -0,33 | 0,543291636 | 0,15  | 0,680951303 | 0,02  | 0,984125319 |
| Vmn1r6  | 0,2   | 0,733583213 | 0,58  | 0,586775333 | -0,3  | 0,718448905 | -0,54 | 0,655202878 | -0,06 | 0,977129365 |
| Vmn1r60 | -0,16 | 0,701391957 | 0,08  | 0,868010263 | -0,17 | 0,744387748 | -0,08 | 0,852687535 | 0,03  | 0,973588648 |
| Vmn1r61 | 0,02  | 0,978501161 | -0,15 | 0,790350061 | -0,11 | 0,841563482 | 0,02  | 0,966197507 | 0,02  | 0,980593822 |

|             |       |             |       |             |       |             |       |             |       |             |
|-------------|-------|-------------|-------|-------------|-------|-------------|-------|-------------|-------|-------------|
| Vmn1r64     | -0,13 | 0,743593944 | 0,02  | 0,982786635 | -0,02 | 0,97674065  | -0,12 | 0,763621113 | -0,16 | 0,830813323 |
| Vmn1r65     | -0,02 | 0,986795639 | -0,13 | 0,839789639 | 0,22  | 0,721952929 | 0,21  | 0,697364261 | 0     | 0,999572304 |
| Vmn1r66     | 0,53  | 0,533410889 | 0,12  | 0,86245211  | 0,07  | 0,919754592 | 0,11  | 0,857884225 | 0,25  | 0,730289864 |
| Vmn1r67     | -0,19 | 0,782586323 | -0,02 | 0,973945454 | 0,05  | 0,950725218 | -0,04 | 0,958900399 | -0,11 | 0,911850421 |
| Vmn1r68     | -0,1  | 0,818418973 | 0,06  | 0,901002199 | -0,26 | 0,587531732 | -0,3  | 0,364250425 | -0,24 | 0,670793583 |
| Vmn1r69     | -0,09 | 0,903268859 | 0,07  | 0,892869412 | 0,05  | 0,952104131 | -0,09 | 0,866703824 | -0,1  | 0,894327929 |
| Vmn1r7      | -0,01 | 0,986795639 | 0,07  | 0,880473303 | -0,21 | 0,711793051 | -0,21 | 0,532367854 | -0,29 | 0,562557824 |
| Vmn1r70     | -0,13 | 0,793209485 | 0,09  | 0,850282029 | 0,07  | 0,915321116 | -0,15 | 0,803228733 | -0,02 | 0,984125319 |
| Vmn1r71     | 0,22  | 0,64776317  | -0,1  | 0,907235638 | 0,03  | 0,96865009  | -0,11 | 0,775247776 | -0,06 | 0,939248399 |
| Vmn1r72     | 0,39  | 0,509815996 | 0,29  | 0,609977513 | -0,2  | 0,774393816 | -0,4  | 0,464815834 | 0,08  | 0,920710557 |
| Vmn1r73     | 0,1   | 0,910211895 | -0,29 | 0,606866408 | -0,02 | 0,982736769 | 0,28  | 0,464815834 | 0,1   | 0,898448235 |
| Vmn1r74     | -0,1  | 0,910758076 | 0,26  | 0,716080623 | -0,09 | 0,878636183 | -0,01 | 0,979829655 | 0,32  | 0,655956123 |
| Vmn1r75     | 0,2   | 0,619738681 | -0,02 | 0,964894023 | -0,12 | 0,865195598 | 0,02  | 0,971954402 | 0,11  | 0,917766344 |
| Vmn1r76     | -0,01 | 0,991859434 | -0,1  | 0,841184864 | 0,15  | 0,807521381 | 0,03  | 0,943143586 | -0,1  | 0,92261128  |
| Vmn1r77     | -0,01 | 0,988846353 | -0,07 | 0,893671357 | -0,07 | 0,949489888 | -0,07 | 0,876246814 | 0,21  | 0,824818547 |
| Vmn1r78     | 0,13  | 0,805603729 | -0,22 | 0,715688609 | -0,13 | 0,851970427 | 0,34  | 0,443238713 | 0,17  | 0,844265172 |
| Vmn1r79     | 0,31  | 0,70297447  | -0,17 | 0,730536814 | -0,21 | 0,736837174 | 0,13  | 0,75629951  | 0,34  | 0,563077271 |
| Vmn1r8      | 0,2   | 0,619769947 | 0,09  | 0,928081092 | 0,05  | 0,950725218 | -0,02 | 0,967866794 | 0,21  | 0,718299139 |
| Vmn1r80     | 0,32  | 0,778486036 | -0,57 | 0,414206292 | -0,06 | 0,94110925  | 0,14  | 0,751187418 | -0,35 | 0,4940585   |
| Vmn1r81     | 0,29  | 0,575746847 | 0,01  | 0,986782918 | -0,08 | 0,932577939 | 0,03  | 0,959958662 | -0,21 | 0,755677288 |
| Vmn1r82     | 0     | 0,998964203 | -0,04 | 0,944460866 | -0,1  | 0,904159642 | -0,02 | 0,960747562 | 0,31  | 0,562557824 |
| Vmn1r83     | 0,23  | 0,605377261 | 0,31  | 0,583764309 | -0,1  | 0,868125824 | -0,45 | 0,575912901 | -0,65 | 0,331912927 |
| Vmn1r84     | 0,14  | 0,76339907  | 0,02  | 0,969019461 | -0,11 | 0,870060547 | 0     | 1           | 0,05  | 0,956959946 |
| Vmn1r85     | 0,16  | 0,721797378 | -0,09 | 0,83933922  | 0     | 0,997394645 | 0,05  | 0,908792069 | -0,02 | 0,977967676 |
| Vmn1r86     | 0,08  | 0,89763852  | 0,47  | 0,559630539 | -0,08 | 0,901032944 | -0,13 | 0,727917871 | -0,05 | 0,956702425 |
| Vmn1r87     | 0,1   | 0,853743824 | 0,08  | 0,853388981 | -0,09 | 0,880840964 | 0,13  | 0,745246784 | 0,04  | 0,965348932 |
| Vmn1r88     | 0,21  | 0,617280733 | -0,08 | 0,882589938 | 0,18  | 0,774996627 | 0,13  | 0,736321894 | 0,11  | 0,894623317 |
| Vmn1r89     | -0,12 | 0,839375532 | 0,21  | 0,704681588 | 0,07  | 0,930308787 | 0     | 1           | -0,03 | 0,977775233 |
| Vmn1r9      | 0,18  | 0,669648882 | 0,2   | 0,745921616 | -0,1  | 0,898382247 | 0,08  | 0,850699918 | 0,01  | 0,992890723 |
| Vmn1r91     | 0,35  | 0,621072378 | 0,07  | 0,888759454 | 0,04  | 0,97041109  | 0     | 1           | 0,22  | 0,774028498 |
| Vmn1r94     | 0,5   | 0,374444487 | -0,4  | 0,800067055 | 0,22  | 0,747599709 | 0,3   | 0,654230107 | -0,18 | 0,766703448 |
| Vmn1r-ps103 | 0,1   | 0,813243595 | 0,11  | 0,855607772 | 0,01  | 0,995401448 | -0,11 | 0,784621098 | -0,07 | 0,927807084 |
| Vmn2r1      | -0,3  | 0,770640793 | 0,54  | 0,6840278   | -0,2  | 0,665727181 | 0,3   | 0,693136389 | 0,5   | 0,469594536 |
| Vmn2r10     | 0     | 0,995583843 | 0,22  | 0,79295936  | -0,27 | 0,667627312 | -0,11 | 0,845813504 | -0,17 | 0,841333243 |
| Vmn2r100    | 0,18  | 0,777335496 | 0,72  | 0,314703215 | 0,22  | 0,801755243 | -0,18 | 0,725672514 | 0,18  | 0,813475751 |

|          |       |             |       |             |       |             |       |             |       |             |
|----------|-------|-------------|-------|-------------|-------|-------------|-------|-------------|-------|-------------|
| Vmn2r101 | 0,29  | 0,497195909 | 0,29  | 0,565639972 | -0,1  | 0,879995372 | -0,42 | 0,236937742 | 0,07  | 0,937446198 |
| Vmn2r102 | 0,16  | 0,672603785 | 0     | 0,999395995 | -0,18 | 0,785676028 | 0,16  | 0,62736758  | 0,2   | 0,715584608 |
| Vmn2r103 | 0,11  | 0,794588318 | 0,01  | 0,987282412 | -0,08 | 0,897127882 | -0,11 | 0,828256292 | -0,01 | 0,988951212 |
| Vmn2r104 | 0,12  | 0,810101389 | 0,12  | 0,874049742 | -0,1  | 0,898684568 | -0,17 | 0,812334745 | -0,19 | 0,765419939 |
| Vmn2r105 | 0,24  | 0,832696131 | -0,51 | 0,586770731 | -0,04 | 0,973998536 | 0,33  | 0,645842474 | 0,3   | 0,745574572 |
| Vmn2r106 | 0,3   | 0,679989164 | 0,16  | 0,783476914 | -0,26 | 0,825782434 | -0,31 | 0,37252791  | 0,22  | 0,702402249 |
| Vmn2r107 | 0,09  | 0,903666411 | 0,13  | 0,892869412 | -0,76 | 0,207797844 | 0,13  | 0,885020399 | 0,3   | 0,792305774 |
| Vmn2r108 | 0,06  | 0,944291635 | -0,28 | 0,595141091 | -0,22 | 0,701501564 | 0,19  | 0,837946196 | 0,5   | 0,587915673 |
| Vmn2r109 | -0,61 | 0,454252481 | -0,04 | 0,987680094 | -0,04 | 0,967154353 | 0,22  | 0,825908912 | -0,26 | 0,855413544 |
| Vmn2r11  | 0,16  | 0,707480624 | -0,17 | 0,763005394 | 0,05  | 0,950725218 | -0,24 | 0,590307186 | -0,01 | 0,991977803 |
| Vmn2r110 | 0,5   | 0,533289554 | -0,14 | 0,854940418 | -0,08 | 0,935551541 | 0,05  | 0,906206563 | -0,39 | 0,562836808 |
| Vmn2r111 | -0,36 | 0,626534172 | 0,02  | 0,981630855 | -0,59 | 0,202239836 | -0,48 | 0,584887631 | -0,48 | 0,587199571 |
| Vmn2r112 | 0,38  | 0,520667704 | 0,35  | 0,710407859 | 0,12  | 0,896181325 | -0,12 | 0,866391439 | -0,19 | 0,835191    |
| Vmn2r113 | 0,36  | 0,393754139 | -0,13 | 0,789363581 | -0,25 | 0,702689055 | 0,13  | 0,745159546 | 0,38  | 0,583952152 |
| Vmn2r114 | 0,3   | 0,50199908  | 0,48  | 0,375351538 | -0,1  | 0,858393835 | -0,32 | 0,48485622  | -0,36 | 0,566248044 |
| Vmn2r115 | -0,11 | 0,895072199 | 0,01  | 0,997628855 | -0,06 | 0,947034823 | 0,25  | 0,640840438 | 0,27  | 0,669019143 |
| Vmn2r116 | -0,24 | 0,665901437 | 0,04  | 0,943958275 | -0,02 | 0,991562229 | -0,25 | 0,642729506 | 0     | 0,998704075 |
| Vmn2r117 | -0,26 | 0,687662951 | -0,24 | 0,812664394 | -0,03 | 0,973006385 | 0,11  | 0,87148686  | -0,05 | 0,956800412 |
| Vmn2r118 | 0,13  | 0,802427928 | -0,38 | 0,526182879 | -0,14 | 0,807521381 | 0,01  | 0,991453278 | -0,07 | 0,955910202 |
| Vmn2r12  | -0,06 | 0,943079514 | -0,26 | 0,524552054 | 0,36  | 0,611144549 | 0,23  | 0,776545078 | -0,3  | 0,845142293 |
| Vmn2r120 | -0,3  | 0,59710379  | -0,24 | 0,677713323 | -0,19 | 0,77027744  | 0,26  | 0,602392504 | 0,18  | 0,85155002  |
| Vmn2r121 | 0,35  | 0,631219977 | 0,11  | 0,807463629 | 0,01  | 0,993379272 | -0,13 | 0,882478591 | -0,09 | 0,940774655 |
| Vmn2r122 | 0,02  | 0,981412917 | 0,05  | 0,930849936 | -0,31 | 0,457506381 | -0,01 | 0,994638711 | 0,26  | 0,735152891 |
| Vmn2r124 | 0,28  | 0,537328866 | -0,07 | 0,90251322  | -0,12 | 0,843394396 | -0,16 | 0,740434535 | -0,35 | 0,560964387 |
| Vmn2r14  | -0,19 | 0,829299665 | 0,13  | 0,868839934 | -0,07 | 0,911601881 | -0,2  | 0,761591561 | -0,2  | 0,808378459 |
| Vmn2r15  | 0,13  | 0,78340049  | 0,19  | 0,664787536 | 0,03  | 0,972669335 | -0,08 | 0,82581314  | 0,06  | 0,940149515 |
| Vmn2r16  | -0,14 | 0,843281524 | 0,26  | 0,857408462 | -0,19 | 0,79500424  | 0,02  | 0,986544789 | -0,11 | 0,911793849 |
| Vmn2r17  | 0,03  | 0,973083012 | 0,28  | 0,747707816 | 0,17  | 0,861877024 | -0,05 | 0,923403061 | -0,29 | 0,633084591 |
| Vmn2r18  | -0,08 | 0,939061259 | 0,19  | 0,862894611 | -0,22 | 0,792778751 | -0,08 | 0,905282867 | 0,16  | 0,876418697 |
| Vmn2r19  | -0,07 | 0,907748757 | 0,21  | 0,789051952 | 0,23  | 0,750027264 | -0,08 | 0,932803079 | 0,15  | 0,91314596  |
| Vmn2r2   | -0,08 | 0,904633081 | 0,48  | 0,667502888 | -0,25 | 0,786553108 | -0,25 | 0,577914953 | -0,29 | 0,677222415 |
| Vmn2r20  | -0,11 | 0,808947569 | -0,13 | 0,771278839 | -0,38 | 0,550001843 | 0,02  | 0,971338071 | 0,31  | 0,649846438 |
| Vmn2r23  | 0,6   | 0,604260074 | 0,14  | 0,953631922 | -0,82 | 0,210837457 | 0,03  | 0,973030822 | 0,04  | 0,979392852 |
| Vmn2r24  | -0,19 | 0,874146026 | 0,13  | 0,904698551 | 0,07  | 0,925245169 | -0,14 | 0,847641912 | 0     | 0,997254437 |
| Vmn2r26  | -0,13 | 0,899359458 | 0,19  | 0,764299173 | -0,1  | 0,935887545 | 0,17  | 0,754878742 | 0,02  | 0,984125319 |

|         |       |             |       |             |       |             |       |             |       |             |
|---------|-------|-------------|-------|-------------|-------|-------------|-------|-------------|-------|-------------|
| Vmn2r27 | 0,27  | 0,593861914 | -0,08 | 0,94581674  | -0,02 | 0,980409788 | -0,26 | 0,656559309 | 0,11  | 0,906933153 |
| Vmn2r28 | 0,28  | 0,758636946 | -0,21 | 0,784390856 | -0,02 | 0,984518072 | 0,01  | 0,985865561 | 0,02  | 0,98580625  |
| Vmn2r29 | -0,37 | 0,700762684 | 0,14  | 0,943436096 | -1,59 | 0,163016798 | 0,04  | 0,970874875 | -0,02 | 0,987506432 |
| Vmn2r3  | 0,46  | 0,48475579  | 0,21  | 0,783858612 | 0,18  | 0,819577283 | -0,45 | 0,446566698 | -0,11 | 0,932627212 |
| Vmn2r30 | 0,38  | 0,836559066 | -0,32 | 0,883895522 | -0,69 | 0,469102587 | 0,25  | 0,872399256 | 0,11  | 0,939127163 |
| Vmn2r32 | 0,31  | 0,640002115 | 0,02  | 0,982420791 | -0,24 | 0,682301483 | -0,03 | 0,970897388 | 0,15  | 0,871038748 |
| Vmn2r33 | 0,17  | 0,838208309 | 0,25  | 0,797124845 | -0,23 | 0,814956693 | -0,5  | 0,452143621 | 0,17  | 0,880901187 |
| Vmn2r34 | 0,01  | 0,989925592 | -0,35 | 0,654485156 | -0,48 | 0,584320897 | 0,4   | 0,422943572 | -0,29 | 0,811321326 |
| Vmn2r35 | 0,69  | 0,57018113  | -0,26 | 0,792617844 | -0,1  | 0,959437564 | -0,31 | 0,62296101  | 0,42  | 0,71650814  |
| Vmn2r37 | -0,37 | 0,61660035  | -0,32 | 0,701043773 | -0,12 | 0,862892093 | 0,36  | 0,527184341 | 0,23  | 0,85508146  |
| Vmn2r4  | 0,17  | 0,673291416 | -0,11 | 0,819120994 | 0,02  | 0,979791644 | 0,03  | 0,957427513 | 0,06  | 0,947901649 |
| Vmn2r42 | 0,02  | 0,989349635 | 0,36  | 0,630975718 | 0,27  | 0,792929018 | -0,02 | 0,963115212 | 0,2   | 0,728483022 |
| Vmn2r43 | 0,02  | 0,985886594 | -0,31 | 0,716668427 | -0,56 | 0,289144374 | -0,03 | 0,965653854 | -0,38 | 0,628438378 |
| Vmn2r51 | 0,29  | 0,617280733 | 0,02  | 0,97875059  | -0,2  | 0,757498725 | -0,2  | 0,669457175 | -0,19 | 0,827532593 |
| Vmn2r52 | 0,14  | 0,816596478 | -0,12 | 0,881916966 | -0,12 | 0,824306509 | -0,21 | 0,602988996 | -0,21 | 0,723883531 |
| Vmn2r53 | -0,06 | 0,912842584 | 0,15  | 0,791426435 | -0,32 | 0,483761569 | -0,04 | 0,949166455 | 0,54  | 0,255267133 |
| Vmn2r54 | 0,47  | 0,364628239 | 0,1   | 0,842793123 | -0,21 | 0,718448905 | -0,01 | 0,988205241 | 0,03  | 0,974767202 |
| Vmn2r55 | 0,03  | 0,960052101 | 0,21  | 0,861854217 | -0,16 | 0,863503599 | 0,08  | 0,898791139 | 0,21  | 0,724153471 |
| Vmn2r56 | 0,08  | 0,913588642 | 0,58  | 0,583615754 | -0,4  | 0,517794976 | -0,33 | 0,653067727 | -0,12 | 0,872417427 |
| Vmn2r58 | 0,09  | 0,90742841  | 0,26  | 0,853048435 | -0,13 | 0,912968686 | 0,13  | 0,886769103 | -0,19 | 0,803732051 |
| Vmn2r59 | 0,07  | 0,905414735 | 0,05  | 0,972776489 | 0,04  | 0,968638834 | 0,11  | 0,818849811 | 0,09  | 0,913553402 |
| Vmn2r60 | 0     | 0,998027251 | 0,33  | 0,694017753 | 0,12  | 0,897127882 | -0,47 | 0,404293645 | 0,3   | 0,720844381 |
| Vmn2r61 | -0,41 | 0,501682835 | 0,2   | 0,808765248 | -0,58 | 0,565000624 | -0,51 | 0,437441721 | -0,32 | 0,763240477 |
| Vmn2r63 | 0,31  | 0,51663224  | 0,19  | 0,810875398 | -0,23 | 0,672490033 | -0,22 | 0,577126259 | -0,1  | 0,905581898 |
| Vmn2r65 | 0,09  | 0,844095084 | 0,41  | 0,299901212 | -0,06 | 0,941514253 | -0,28 | 0,370540188 | 0     | 0,995109577 |
| Vmn2r66 | 0,33  | 0,679733535 | 0,38  | 0,613449608 | -0,1  | 0,903918012 | 0,21  | 0,663875303 | 0,27  | 0,60105426  |
| Vmn2r67 | 0,42  | 0,489008935 | -0,54 | 0,594415097 | -0,46 | 0,555899224 | 0,23  | 0,806145597 | 0,57  | 0,534171045 |
| Vmn2r68 | -0,11 | 0,903817676 | 0,21  | 0,924525687 | -0,27 | 0,585645978 | -0,01 | 0,996451727 | -0,33 | 0,797293554 |
| Vmn2r69 | -0,16 | 0,77027589  | 0,24  | 0,670902144 | -0,17 | 0,730738549 | -0,13 | 0,783119247 | 0,2   | 0,763240477 |
| Vmn2r7  | 0,24  | 0,689966234 | -0,01 | 0,999438768 | 0,16  | 0,893010661 | 0,01  | 0,984136649 | -0,11 | 0,948163009 |
| Vmn2r70 | 0,28  | 0,612486546 | 0,53  | 0,268436493 | 0,09  | 0,925211014 | 0,03  | 0,97047829  | 0,16  | 0,865258929 |
| Vmn2r71 | 0,05  | 0,946082673 | 0,26  | 0,785543886 | -0,12 | 0,841563482 | -0,45 | 0,543629136 | -0,32 | 0,622910734 |
| Vmn2r72 | -0,02 | 0,972164346 | -0,33 | 0,531718087 | -0,05 | 0,946768463 | 0,38  | 0,357261043 | 0,04  | 0,962820357 |
| Vmn2r73 | 0,12  | 0,803557792 | 0,37  | 0,723566168 | 0,04  | 0,958029325 | -0,14 | 0,770159985 | -0,12 | 0,884640084 |
| Vmn2r74 | 0,01  | 0,995778597 | 0,39  | 0,519915586 | 0,02  | 0,993379272 | 0,34  | 0,718510867 | 0,04  | 0,976743304 |

|             |       |             |       |             |       |             |       |             |       |             |
|-------------|-------|-------------|-------|-------------|-------|-------------|-------|-------------|-------|-------------|
| Vmn2r75     | 0,5   | 0,589442341 | -0,27 | 0,585443341 | -0,03 | 0,975771514 | 0,03  | 0,967047406 | 0,31  | 0,684349871 |
| Vmn2r76     | 0,22  | 0,773899768 | -0,46 | 0,73623784  | 0,01  | 0,993379272 | 0,43  | 0,254784646 | 0,2   | 0,728388857 |
| Vmn2r77     | 0,08  | 0,899922256 | 0,1   | 0,894022563 | -0,27 | 0,815942732 | 0     | 0,999811182 | 0,37  | 0,649849091 |
| Vmn2r79     | 0,37  | 0,576695743 | -0,24 | 0,698886888 | 0,27  | 0,611144549 | 0,15  | 0,785282034 | -0,08 | 0,933307994 |
| Vmn2r8      | -0,31 | 0,506163514 | 0,39  | 0,459417799 | 0,04  | 0,973641476 | 0,04  | 0,95852873  | 0,15  | 0,904830156 |
| Vmn2r80     | -0,06 | 0,9231839   | -0,2  | 0,75247655  | -0,17 | 0,777210497 | 0,04  | 0,953222061 | -0,35 | 0,503212672 |
| Vmn2r81     | -0,26 | 0,627243562 | -0,29 | 0,496223407 | -0,06 | 0,949334141 | 0,33  | 0,570557051 | 0,27  | 0,715879151 |
| Vmn2r82     | 0,29  | 0,714127381 | 0,21  | 0,853458666 | -0,06 | 0,949135765 | 0,03  | 0,958366323 | -0,03 | 0,968047896 |
| Vmn2r83     | -0,25 | 0,781976975 | 0,01  | 0,999785703 | -0,1  | 0,887977305 | 0,67  | 0,260572741 | 0,08  | 0,94480601  |
| Vmn2r84     | 1,02  | 0,598023261 | 0,11  | 0,948048585 | 0,04  | 0,956894731 | 0,23  | 0,881280979 | -0,06 | 0,979152939 |
| Vmn2r85     | 0,33  | 0,576009654 | 0,05  | 0,970020205 | -0,36 | 0,660394995 | -0,1  | 0,914272156 | -0,07 | 0,956754595 |
| Vmn2r86     | 0,03  | 0,978542552 | -0,2  | 0,824691053 | -0,2  | 0,744122364 | 0     | 1           | -0,14 | 0,845872843 |
| Vmn2r87     | -0,21 | 0,813025176 | -0,16 | 0,732847182 | -0,1  | 0,920186705 | 0,27  | 0,628651685 | 0,15  | 0,910301996 |
| Vmn2r88     | -0,1  | 0,856118781 | -0,27 | 0,619597617 | -0,03 | 0,967767582 | 0,18  | 0,58168661  | -0,18 | 0,868167014 |
| Vmn2r89     | -0,32 | 0,496123406 | 0,07  | 0,956555856 | -0,12 | 0,872313115 | -0,28 | 0,71544265  | 0,08  | 0,935747791 |
| Vmn2r9      | 0,25  | 0,651593352 | 0,01  | 0,995592294 | 0,05  | 0,962766843 | -0,05 | 0,910189972 | -0,12 | 0,860469017 |
| Vmn2r90     | 0,25  | 0,833900133 | -0,02 | 0,998513452 | -0,37 | 0,675539876 | 0,47  | 0,552551232 | -0,12 | 0,874452469 |
| Vmn2r92     | 0,14  | 0,779331628 | 0,44  | 0,565881295 | -0,5  | 0,379638471 | -0,24 | 0,582839576 | 0,06  | 0,947254077 |
| Vmn2r93     | 0,06  | 0,958395861 | -0,16 | 0,750811049 | -0,18 | 0,757498725 | 0,28  | 0,560223278 | 0,41  | 0,583882299 |
| Vmn2r94     | -0,03 | 0,975386402 | 0,2   | 0,927205716 | -0,22 | 0,676418104 | -0,02 | 0,986768223 | 0,04  | 0,980945466 |
| Vmn2r95     | -0,13 | 0,841714806 | 0,06  | 0,947986685 | -0,33 | 0,570568062 | 0,02  | 0,974835696 | 0,09  | 0,890417696 |
| Vmn2r96     | 0,18  | 0,864400092 | 0,2   | 0,786074087 | -0,01 | 0,99407001  | -0,72 | 0,276093686 | -0,51 | 0,459584226 |
| Vmn2r97     | -0,07 | 0,924139727 | -0,25 | 0,654778612 | -0,12 | 0,839669459 | 0,23  | 0,575846032 | 0,03  | 0,976743304 |
| Vmn2r98     | -0,18 | 0,778869381 | 0,53  | 0,732847182 | -0,39 | 0,448782702 | 0,07  | 0,921036173 | 0,32  | 0,568949282 |
| Vmn2r99     | 0,07  | 0,943079514 | -0,34 | 0,588299809 | -0,33 | 0,581742447 | -0,21 | 0,880590198 | -0,18 | 0,933759514 |
| Vmn2r-ps104 | 0,16  | 0,764189777 | -0,04 | 0,945143056 | -0,32 | 0,508096454 | -0,16 | 0,768036061 | -0,04 | 0,971058066 |
| Vmn2r-ps129 | 0,05  | 0,909325137 | 0,04  | 0,93451524  | 0,05  | 0,946046271 | 0,22  | 0,535895689 | 0,06  | 0,947437555 |
| Vmn2r-ps159 | -0,14 | 0,930847983 | 0,03  | 0,993789602 | 0,17  | 0,863964732 | 0,2   | 0,876439802 | -0,24 | 0,880202418 |
| Vmn2r-ps54  | -0,12 | 0,853962146 | -0,32 | 0,798963476 | 0,1   | 0,913333366 | 0,09  | 0,943143586 | 0,16  | 0,887859063 |
| Vmn2r-ps60  | -0,06 | 0,911496714 | -0,07 | 0,907167997 | 0,12  | 0,865917495 | 0,07  | 0,85478242  | 0     | 0,999303691 |
| Vmo1        | 0,26  | 0,552940583 | 0,38  | 0,508633526 | -0,2  | 0,736669204 | 0,29  | 0,522013196 | 0,1   | 0,935708361 |
| Vmp1        | -0,11 | 0,843924925 | -0,41 | 0,300191093 | 0,97  | 0,302861841 | 0,98  | 0,325202655 | 0,15  | 0,934185668 |
| Vnn1        | 0,18  | 0,778869381 | -0,06 | 0,927804354 | 0,25  | 0,712697139 | -0,54 | 0,377733267 | 0,82  | 0,450543672 |
| Vnn3        | -0,49 | 0,364497258 | -0,21 | 0,755393855 | 0,39  | 0,502327845 | 0,15  | 0,70800461  | 0,13  | 0,894623317 |
| Vopp1       | 0,47  | 0,372888083 | -0,06 | 0,952878559 | 0,14  | 0,943365715 | 0,5   | 0,415968391 | 0,13  | 0,891925115 |



|        |       |             |       |             |       |             |       |             |       |             |
|--------|-------|-------------|-------|-------------|-------|-------------|-------|-------------|-------|-------------|
| Vprbp  | -0,18 | 0,84241758  | 0,13  | 0,855607772 | 0,56  | 0,557268968 | 0,51  | 0,479762968 | 0,35  | 0,682134021 |
| Vpreb1 | -0,2  | 0,874688734 | -1,2  | 0,5012237   | 1,42  | 0,337509636 | 0,22  | 0,943143586 | 0,41  | 0,894623317 |
| Vpreb2 | -0,03 | 0,964154899 | 0,28  | 0,612645853 | 0,43  | 0,54913284  | 0,1   | 0,873812847 | 0,13  | 0,878643371 |
| Vpreb3 | 0,28  | 0,578278667 | -0,18 | 0,838808011 | 0,19  | 0,702149525 | -0,46 | 0,506357609 | -0,3  | 0,807909378 |
| Vps11  | -0,24 | 0,69656531  | 0,32  | 0,561842393 | -0,03 | 0,977827235 | -0,68 | 0,149566901 | -0,24 | 0,745574572 |
| Vps13a | 0,11  | 0,921306075 | 0,5   | 0,558015928 | 0,49  | 0,478810325 | -0,9  | 0,186919907 | 0,11  | 0,911265816 |
| Vps13b | -0,55 | 0,581066391 | -0,19 | 0,746613401 | -0,06 | 0,93605596  | -0,08 | 0,861140391 | -0,29 | 0,651930786 |
| Vps13c | 0,27  | 0,630133896 | 0,66  | 0,328485456 | -0,37 | 0,653810439 | -0,77 | 0,219624257 | 0,49  | 0,45155383  |
| Vps13d | -0,13 | 0,889406162 | -0,02 | 0,987282412 | -0,02 | 0,982241391 | -0,74 | 0,153265608 | -0,48 | 0,385014622 |
| Vps16  | -0,41 | 0,602588901 | 0,08  | 0,945143056 | 0,46  | 0,520548688 | 0,12  | 0,917183011 | -0,07 | 0,961406182 |
| Vps18  | 0     | 1           | -0,18 | 0,788759447 | -0,1  | 0,909963525 | -0,11 | 0,786750698 | -0,25 | 0,697818445 |
| Vps25  | 0,02  | 0,981889402 | -0,34 | 0,487451484 | 0,28  | 0,726425559 | -0,22 | 0,585422472 | -0,55 | 0,319597889 |
| Vps26a | 0,34  | 0,652819827 | 0,08  | 0,940046211 | -0,17 | 0,866141679 | -0,34 | 0,577059558 | 0,38  | 0,518216192 |
| Vps26b | -0,53 | 0,177782553 | -0,45 | 0,476383101 | -0,17 | 0,849697489 | 0,18  | 0,634468023 | -0,84 | 0,058154114 |
| Vps28  | -0,08 | 0,876689985 | -0,19 | 0,732847182 | 0,31  | 0,635864143 | -0,1  | 0,791822555 | 0     | 0,999775166 |
| Vps29  | 0,03  | 0,950780433 | -0,19 | 0,695823136 | 0,08  | 0,914725972 | 0,07  | 0,921063977 | 0,09  | 0,922709938 |
| Vps33a | 0,19  | 0,692923111 | -0,33 | 0,630385231 | 0,25  | 0,688298291 | -0,19 | 0,710912745 | -0,17 | 0,825272094 |
| Vps33b | -1,11 | 0,189684245 | -0,44 | 0,321139738 | 0,42  | 0,729031049 | 0,32  | 0,645988169 | 0,24  | 0,865258929 |
| Vps35  | -0,2  | 0,679008919 | 0     | 1           | 0,34  | 0,615286789 | 0,06  | 0,922275195 | 0,28  | 0,651895091 |
| Vps36  | 0,05  | 0,932155394 | 0,23  | 0,750646319 | -0,12 | 0,925195648 | -0,19 | 0,586519845 | -0,13 | 0,85945887  |
| Vps37a | 0,11  | 0,916216582 | 0,11  | 0,907186434 | -0,17 | 0,898909646 | 0,62  | 0,387496385 | 0,55  | 0,474007701 |
| Vps37b | -0,25 | 0,687537872 | 0,86  | 0,487771533 | -0,29 | 0,727262258 | -0,74 | 0,212698904 | 0,17  | 0,844105751 |
| Vps37c | -0,09 | 0,878548823 | 0,16  | 0,70385918  | -0,45 | 0,322097188 | 0,27  | 0,480493327 | 0,13  | 0,846540618 |
| Vps37d | -0,05 | 0,947760642 | 0,39  | 0,661566887 | -0,36 | 0,545721901 | -0,05 | 0,945796985 | -0,03 | 0,980932608 |
| Vps39  | 0,08  | 0,921924723 | 0,41  | 0,51915071  | 0,58  | 0,598063616 | -0,26 | 0,602738935 | -0,4  | 0,514887811 |
| Vps41  | -0,43 | 0,364107408 | 0,19  | 0,874448335 | 0,35  | 0,747847718 | 0,19  | 0,84748792  | 0,26  | 0,789659931 |
| Vps45  | -0,43 | 0,423595612 | -0,16 | 0,790939978 | 0,7   | 0,628048897 | -0,01 | 0,997670938 | -0,61 | 0,550083777 |
| Vps4a  | -0,11 | 0,815219917 | -0,03 | 0,97657246  | 0,68  | 0,294972378 | -0,36 | 0,298503592 | -0,39 | 0,587735967 |
| Vps4b  | -0,05 | 0,932354771 | -0,02 | 0,973043968 | -0,23 | 0,807805075 | 0,1   | 0,910298592 | -0,37 | 0,669861917 |
| Vps50  | 0,25  | 0,791084597 | -0,32 | 0,572942783 | 1,03  | 0,242752144 | 0,53  | 0,267639393 | 0,15  | 0,860469017 |
| Vps51  | -0,1  | 0,869565514 | 0,17  | 0,781665479 | -0,21 | 0,834017354 | -0,22 | 0,75526266  | -0,57 | 0,498582364 |
| Vps52  | -0,52 | 0,374743123 | -0,15 | 0,857388191 | 0,59  | 0,574125052 | -0,13 | 0,834014806 | -0,45 | 0,537706015 |
| Vps53  | -0,48 | 0,205427898 | -0,27 | 0,586770731 | 0,05  | 0,978012085 | -0,44 | 0,254784646 | -0,28 | 0,665054064 |
| Vps54  | 0,5   | 0,26178903  | 0,77  | 0,265576333 | -0,8  | 0,164732119 | 0,34  | 0,291566387 | 1,13  | 0,061085652 |
| Vps72  | -0,42 | 0,39713821  | -0,19 | 0,643955364 | 0,45  | 0,409611548 | -0,06 | 0,943864463 | -0,18 | 0,840952901 |

|         |       |             |       |             |       |             |       |             |       |             |
|---------|-------|-------------|-------|-------------|-------|-------------|-------|-------------|-------|-------------|
| Vps8    | -0,38 | 0,419180544 | 0,24  | 0,62407696  | 0,38  | 0,62544037  | -0,43 | 0,335079211 | 0,11  | 0,927536545 |
| Vps9d1  | 0,05  | 0,93115708  | 0,06  | 0,902830091 | 0,02  | 0,982072218 | 0,24  | 0,579663223 | 0,28  | 0,674843991 |
| Vrk1    | 0,04  | 0,972315612 | -0,52 | 0,619501651 | 0,61  | 0,530744363 | 0,36  | 0,858956727 | 0,63  | 0,726042963 |
| Vrk2    | -0,27 | 0,7830424   | 0,01  | 0,997344247 | 0,11  | 0,943069255 | -0,12 | 0,938387989 | -0,56 | 0,608072805 |
| Vrk3    | 0,31  | 0,489042022 | 0,38  | 0,40486209  | -0,59 | 0,329525512 | 0,02  | 0,968211182 | 0,35  | 0,507222763 |
| Vrtn    | -0,06 | 0,9231839   | 0,05  | 0,95429671  | -0,22 | 0,770526999 | -0,11 | 0,871577562 | 0,05  | 0,965651505 |
| Vsig1   | 0,15  | 0,869565514 | -0,61 | 0,402975324 | -0,08 | 0,944078985 | 0,55  | 0,395424668 | 0,2   | 0,848899219 |
| Vsig10  | -0,51 | 0,576879913 | 0,16  | 0,864363741 | 0,13  | 0,846591983 | 0,72  | 0,471387138 | -0,14 | 0,934615324 |
| Vsig10l | -0,4  | 0,673291416 | -0,09 | 0,932429589 | 0,07  | 0,946952673 | -0,47 | 0,307850065 | -0,27 | 0,675958562 |
| Vsig2   | -0,62 | 0,505859046 | -0,39 | 0,706408751 | -0,12 | 0,950846671 | -0,61 | 0,36184569  | -0,39 | 0,583882299 |
| Vsig4   | 0,01  | 0,987703111 | 0,03  | 0,984812702 | -0,45 | 0,369527192 | -0,21 | 0,747003908 | -0,02 | 0,981079016 |
| Vsig8   | 0,5   | 0,314547808 | 0,2   | 0,856287448 | 0,33  | 0,546514616 | 0,68  | 0,149866673 | -0,07 | 0,944994259 |
| Vsir    | -0,48 | 0,413705714 | -0,13 | 0,880473303 | 0,29  | 0,720364004 | 0,01  | 0,993337409 | -1    | 0,168781914 |
| Vsnl1   | -0,01 | 0,990894139 | -0,11 | 0,842663656 | -0,71 | 0,385794091 | -0,18 | 0,660949118 | 0,03  | 0,979456872 |
| Vstm2a  | 0,25  | 0,69801847  | 0,01  | 0,996113371 | -0,16 | 0,853033407 | 0,3   | 0,731281458 | 0,34  | 0,613482057 |
| Vstm2b  | 0,12  | 0,823834951 | 0,01  | 0,993789602 | -0,1  | 0,892905856 | -0,01 | 0,995662115 | -0,22 | 0,807816401 |
| Vstm2l  | 0,26  | 0,674821764 | -0,27 | 0,768495353 | -0,18 | 0,817583707 | 0,12  | 0,893176593 | 0,33  | 0,643382128 |
| Vstm4   | 0,17  | 0,924097714 | 0,27  | 0,729741948 | -0,72 | 0,324321658 | -0,31 | 0,588987424 | -0,35 | 0,530189977 |
| Vstm5   | -0,37 | 0,680189208 | -0,08 | 0,966717367 | -0,14 | 0,934235869 | -1,1  | 0,216919521 | 0,19  | 0,850599661 |
| Vsx1    | 0,03  | 0,970134229 | -0,35 | 0,627230934 | 0,08  | 0,944078985 | 0,19  | 0,740997825 | -0,5  | 0,416214309 |
| Vsx2    | 0,33  | 0,631448839 | 0,04  | 0,947986685 | 0,14  | 0,861342997 | 0,06  | 0,931250259 | 0,13  | 0,854135221 |
| Vta1    | -0,28 | 0,532523475 | -0,18 | 0,756514853 | -0,09 | 0,9113279   | 1,09  | 0,325923875 | 0,72  | 0,485535389 |
| Vtcn1   | 0,16  | 0,765643907 | 0,1   | 0,932301281 | 0,12  | 0,9113279   | -0,22 | 0,703751395 | -0,14 | 0,884640084 |
| Vti1a   | -0,14 | 0,848780666 | -0,38 | 0,793603525 | 0,52  | 0,50145282  | 0,56  | 0,436661219 | 0,4   | 0,618748455 |
| Vti1b   | -0,25 | 0,598573679 | -0,13 | 0,887493001 | 0,13  | 0,897233315 | -0,04 | 0,95852873  | -0,21 | 0,775482866 |
| Vtn     | 0,15  | 0,911714617 | 0,32  | 0,495561337 | -0,16 | 0,789768168 | -1,66 | 0,018650312 | -1,16 | 0,04667208  |
| Vwa1    | -0,32 | 0,593540946 | -0,15 | 0,852461907 | 0,52  | 0,474076205 | 1,14  | 0,094014104 | -0,09 | 0,927536545 |
| Vwa2    | -0,15 | 0,803737003 | -0,01 | 0,996560611 | 0,09  | 0,923520317 | 0,2   | 0,595407509 | 0,34  | 0,760601931 |
| Vwa3a   | 0,03  | 0,98225675  | -0,22 | 0,602640286 | -0,41 | 0,450605545 | -2,19 | 0,015797024 | -1,35 | 0,122225826 |
| Vwa3b   | -0,28 | 0,580117138 | -0,13 | 0,89034555  | -0,33 | 0,671222427 | -0,55 | 0,253294027 | -0,16 | 0,825966687 |
| Vwa5a   | 0,83  | 0,139492533 | 0,83  | 0,22001825  | -0,79 | 0,085757866 | 0,26  | 0,588930505 | 1,13  | 0,034092284 |
| Vwa5b1  | -0,12 | 0,874467978 | -0,15 | 0,823564094 | 0,26  | 0,688126003 | 0,25  | 0,695760666 | -0,2  | 0,827032122 |
| Vwa5b2  | -0,02 | 0,981777139 | 0,18  | 0,75380926  | -0,22 | 0,68263937  | -0,1  | 0,855041248 | -0,22 | 0,720312918 |
| Vwa7    | 0,42  | 0,525541839 | -0,66 | 0,410501758 | 0,15  | 0,901286451 | 0,34  | 0,716390067 | -0,26 | 0,835786084 |
| Vwa8    | -0,13 | 0,814888638 | -0,12 | 0,89518658  | 0,31  | 0,61483831  | -0,69 | 0,085339914 | -0,35 | 0,587199571 |

|         |       |             |       |             |       |             |       |             |       |             |
|---------|-------|-------------|-------|-------------|-------|-------------|-------|-------------|-------|-------------|
| Vwa9    | -0,2  | 0,728643996 | -0,35 | 0,488326518 | -0,12 | 0,877598693 | 0,75  | 0,064177589 | -0,32 | 0,559558581 |
| Vwc2    | -0,2  | 0,761457464 | 0,02  | 0,981914565 | -0,16 | 0,846176253 | 0,05  | 0,95956355  | 0,03  | 0,979456872 |
| Vwc2l   | 0,18  | 0,753450161 | 0,08  | 0,940111449 | -0,15 | 0,778383291 | -0,01 | 0,99017416  | -0,12 | 0,879072575 |
| Vwce    | 0,19  | 0,699906083 | 0,06  | 0,939289739 | -0,07 | 0,946201063 | 0,02  | 0,980947421 | -0,3  | 0,628274636 |
| Vwde    | 0,15  | 0,827055517 | 0,08  | 0,892727342 | 0,12  | 0,856605654 | 0     | 1           | 0,05  | 0,956610289 |
| Vwf     | -0,45 | 0,319031761 | -0,63 | 0,49125334  | 0,76  | 0,197939663 | 0,61  | 0,336751022 | -1,01 | 0,271713687 |
| Wac     | 0,18  | 0,749231241 | 0,06  | 0,945143056 | -0,17 | 0,808065828 | -0,03 | 0,9704566   | 0,31  | 0,673577848 |
| Wap     | 0,11  | 0,889867231 | 0,29  | 0,493525791 | -0,49 | 0,530318769 | 0,03  | 0,959165274 | -0,01 | 0,992980215 |
| Wapl    | 0,04  | 0,960720096 | 0,12  | 0,924916733 | 0,12  | 0,94768286  | 0,26  | 0,680978695 | 0,06  | 0,952190189 |
| Wars    | 1,26  | 0,155059556 | 1,47  | 0,057631851 | -3,08 | 0,00063463  | 0,37  | 0,233923392 | 2,07  | 0,001769815 |
| Wars2   | -0,44 | 0,496123406 | -0,24 | 0,706417672 | -0,08 | 0,915544298 | 0,03  | 0,988205241 | -0,05 | 0,979456872 |
| Was     | -0,3  | 0,696379019 | 0,57  | 0,538642201 | -0,33 | 0,749783695 | 0,36  | 0,575846032 | -0,1  | 0,904636459 |
| Wasf1   | -0,36 | 0,412428444 | 0,27  | 0,825210924 | 1,09  | 0,114280228 | -0,22 | 0,793483164 | -0,42 | 0,559845734 |
| Wasf2   | -0,04 | 0,944291635 | 0,31  | 0,568187167 | -0,09 | 0,890842571 | -0,63 | 0,156217103 | -0,2  | 0,756418986 |
| Wasf3   | 0,3   | 0,620361515 | -0,17 | 0,765447593 | 0,12  | 0,845518448 | -1,3  | 0,032105469 | -1    | 0,06934133  |
| Wash1   | -0,3  | 0,600313897 | 0,19  | 0,887752277 | 0     | 0,998479656 | 0,12  | 0,825332212 | -0,1  | 0,921063662 |
| Wasl    | -0,14 | 0,832756958 | -0,15 | 0,803104485 | 0,26  | 0,676675094 | -0,19 | 0,541298462 | -0,17 | 0,769280739 |
| Wbp1    | -0,33 | 0,485159825 | 0,04  | 0,970263211 | 0,78  | 0,207797844 | -0,18 | 0,807711977 | -0,86 | 0,164519422 |
| Wbp11   | -0,29 | 0,507090099 | -0,37 | 0,366789691 | 0,5   | 0,304899885 | 0,21  | 0,603766013 | -0,35 | 0,497446382 |
| Wbp1l   | -0,32 | 0,384846699 | 0,03  | 0,953355735 | 0,17  | 0,782182029 | 0,11  | 0,797527363 | -0,28 | 0,608004947 |
| Wbp2    | -0,16 | 0,751568489 | 0,28  | 0,518494408 | -0,23 | 0,757498725 | -0,43 | 0,234246727 | -0,09 | 0,910185187 |
| Wbp2nl  | 0,31  | 0,593510013 | 0,56  | 0,580042259 | -0,26 | 0,655423069 | -0,72 | 0,193431014 | -0,15 | 0,910721379 |
| Wbp4    | -0,03 | 0,967731408 | 0,13  | 0,815317911 | -0,03 | 0,980894511 | -0,22 | 0,540549201 | 0,11  | 0,864166878 |
| Wbp5    | 0,4   | 0,315801833 | 0,13  | 0,781665479 | -0,13 | 0,841245324 | 0,52  | 0,231196038 | 0,94  | 0,061085652 |
| Wbscr16 | -0,61 | 0,249044729 | -0,24 | 0,729172466 | 0,23  | 0,775492921 | 0,2   | 0,633611025 | 0,12  | 0,903153151 |
| Wbscr17 | 0,03  | 0,976495648 | 0,4   | 0,40486209  | 0,13  | 0,842960684 | -0,44 | 0,612464969 | -0,24 | 0,834045122 |
| Wbscr22 | 0,27  | 0,701391957 | -0,62 | 0,16219325  | 0,31  | 0,817780561 | 0     | 1           | -0,39 | 0,669861917 |
| Wbscr25 | -0,17 | 0,741182094 | 0,06  | 0,957659362 | 0,09  | 0,930866621 | -0,09 | 0,857522633 | -0,24 | 0,832848337 |
| Wbscr27 | 1,16  | 0,049002071 | 1,52  | 0,080612373 | -0,2  | 0,770526999 | 0,15  | 0,820360895 | 0,2   | 0,830086988 |
| Wbscr28 | 1,37  | 0,027081255 | 0,4   | 0,345409693 | 0,03  | 0,986853659 | 0,12  | 0,76869079  | 0,1   | 0,895663184 |
| Wdfy1   | 0,34  | 0,81094595  | 0,08  | 0,900801202 | -0,2  | 0,755403453 | 0,22  | 0,768880868 | -0,06 | 0,957993472 |
| Wdfy2   | -0,75 | 0,244269955 | -0,24 | 0,790100113 | -0,35 | 0,629611104 | 0,38  | 0,50447234  | -0,07 | 0,947559952 |
| Wdfy3   | -0,25 | 0,553849378 | -0,16 | 0,808498635 | 0,17  | 0,732540375 | -0,29 | 0,615904804 | -0,3  | 0,629015316 |
| Wdfy4   | 0,11  | 0,853594835 | 0,25  | 0,589051408 | -0,25 | 0,771789829 | 0,26  | 0,618316391 | -0,13 | 0,890396963 |
| Wdhd1   | -0,43 | 0,455526465 | -0,78 | 0,411125721 | 1,65  | 0,046519414 | 0,81  | 0,310183343 | -0,06 | 0,966268839 |

|         |       |             |       |             |       |             |       |             |       |             |
|---------|-------|-------------|-------|-------------|-------|-------------|-------|-------------|-------|-------------|
| Wdpcp   | -0,33 | 0,803737003 | 0,49  | 0,733708652 | 0,51  | 0,640924712 | -0,71 | 0,226196019 | -0,57 | 0,454711077 |
| Wdr1    | -0,45 | 0,268283142 | -0,08 | 0,90164068  | 0,2   | 0,811994297 | 0,83  | 0,124142377 | 0,41  | 0,512907543 |
| Wdr11   | -0,52 | 0,189644465 | -0,22 | 0,697354745 | 0,44  | 0,470379063 | 0,4   | 0,234019266 | 0,13  | 0,862456985 |
| Wdr12   | -0,6  | 0,149941264 | -0,7  | 0,492021207 | 0,16  | 0,922971065 | 0,81  | 0,033468792 | -0,03 | 0,976743304 |
| Wdr13   | 0,43  | 0,483262226 | 0,24  | 0,693906911 | -0,65 | 0,353880101 | 0,06  | 0,922338609 | -0,27 | 0,719285827 |
| Wdr17   | 0,19  | 0,803557792 | -0,25 | 0,818485287 | 0,34  | 0,743604411 | 0,36  | 0,610314614 | 0,16  | 0,866231214 |
| Wdr18   | -0,55 | 0,29396833  | -0,76 | 0,131890974 | 0,53  | 0,57717258  | 0,9   | 0,055624907 | 0,07  | 0,93601271  |
| Wdr19   | -0,57 | 0,59648949  | 0,33  | 0,664787536 | 0,51  | 0,6058212   | -0,15 | 0,944769683 | -0,45 | 0,81954505  |
| Wdr20   | 0,24  | 0,717407143 | 0,46  | 0,567278336 | 0,32  | 0,536115779 | -0,23 | 0,784300926 | 0,21  | 0,83753759  |
| Wdr20rt | -0,15 | 0,813220024 | -0,03 | 0,958545812 | -0,22 | 0,68845998  | 0,02  | 0,968211182 | -0,13 | 0,876666201 |
| Wdr24   | 0,15  | 0,928816764 | 0,11  | 0,943713379 | -0,39 | 0,71593256  | 0,04  | 0,929835301 | -0,32 | 0,653705362 |
| Wdr25   | 0,32  | 0,54401985  | 0,2   | 0,756952478 | 0,26  | 0,821229302 | -0,42 | 0,264453071 | -0,09 | 0,934745577 |
| Wdr26   | 0,21  | 0,638328948 | 0,35  | 0,599471467 | 0,27  | 0,735507379 | 0,31  | 0,483534052 | 0,16  | 0,843403563 |
| Wdr27   | -0,43 | 0,662416763 | 0,57  | 0,540905261 | -0,09 | 0,943170329 | -0,8  | 0,321257704 | -0,29 | 0,793326429 |
| Wdr3    | -0,61 | 0,406819287 | -0,53 | 0,508633526 | 0,62  | 0,576592414 | 0,45  | 0,39527702  | -0,18 | 0,80155635  |
| Wdr31   | 0,27  | 0,689966234 | -0,29 | 0,605851161 | -0,37 | 0,462643491 | -0,06 | 0,958889858 | -0,53 | 0,504660722 |
| Wdr33   | -0,55 | 0,189644465 | -0,15 | 0,921974639 | 0,21  | 0,717856288 | -0,05 | 0,964692144 | 0,72  | 0,462558109 |
| Wdr34   | 0,14  | 0,805603729 | 0,02  | 0,98230594  | -0,56 | 0,272570712 | 0,51  | 0,349146791 | 0,23  | 0,828679046 |
| Wdr35   | -0,1  | 0,948926586 | -0,58 | 0,362448332 | 1,71  | 0,055974537 | -2,14 | 0,026588488 | -0,52 | 0,739121045 |
| Wdr36   | -0,45 | 0,507090099 | -0,5  | 0,467271424 | -0,06 | 0,948637233 | 1,21  | 0,074454367 | 0,26  | 0,739851808 |
| Wdr37   | 0,04  | 0,963228289 | 0,07  | 0,937358556 | -0,34 | 0,708876309 | -0,01 | 0,98810036  | 0,11  | 0,860919132 |
| Wdr38   | -0,15 | 0,816465857 | 0,02  | 0,990052916 | -0,03 | 0,977418982 | -0,03 | 0,974473704 | 0,25  | 0,783143364 |
| Wdr4    | -0,22 | 0,803045877 | -0,38 | 0,553831024 | 0,36  | 0,740579016 | 0,3   | 0,579333727 | -0,28 | 0,759161888 |
| Wdr41   | -0,67 | 0,327334001 | -0,15 | 0,761820188 | 0,16  | 0,901032944 | 0,01  | 0,996074006 | -0,53 | 0,664141521 |
| Wdr43   | -0,6  | 0,180168214 | -0,1  | 0,834836889 | -0,04 | 0,97548193  | 1,27  | 0,076818363 | 0,81  | 0,202369779 |
| Wdr44   | 0,4   | 0,701391957 | 0,34  | 0,84314495  | -0,01 | 0,996633595 | -0,13 | 0,896893    | 1,07  | 0,035693318 |
| Wdr45   | -0,01 | 0,993175772 | -0,3  | 0,583200444 | 0,58  | 0,271482188 | -0,16 | 0,656084967 | -0,27 | 0,684349871 |
| Wdr45b  | 0,11  | 0,781674999 | 0     | 1           | 0,25  | 0,757498725 | 0,33  | 0,329957507 | 0,08  | 0,918465043 |
| Wdr46   | -0,04 | 0,962857082 | -0,39 | 0,507054817 | 0,84  | 0,153842853 | 0,62  | 0,14464678  | -0,05 | 0,960974478 |
| Wdr47   | -0,78 | 0,310190975 | -0,88 | 0,371189141 | 0,38  | 0,662451176 | -0,54 | 0,380919985 | -0,28 | 0,673577848 |
| Wdr48   | 0,24  | 0,586458491 | -0,13 | 0,828498885 | 0,13  | 0,862441091 | -0,4  | 0,294345732 | -0,17 | 0,810234617 |
| Wdr49   | 0,06  | 0,917337233 | -0,21 | 0,852000868 | 0,13  | 0,846689137 | 0,24  | 0,725974026 | -0,07 | 0,953297732 |
| Wdr5    | -0,2  | 0,662416763 | -0,17 | 0,809703475 | 0,92  | 0,37686469  | 0,93  | 0,057045858 | 0,37  | 0,518216192 |
| Wdr53   | -0,27 | 0,578154278 | -0,39 | 0,634673885 | 0,41  | 0,497407038 | 0,73  | 0,380649619 | 0,69  | 0,518216192 |
| Wdr54   | -0,42 | 0,651352627 | 0,19  | 0,831580851 | -0,19 | 0,891365932 | -0,42 | 0,510835785 | -0,44 | 0,523184505 |

|        |       |             |       |             |       |             |       |             |       |             |
|--------|-------|-------------|-------|-------------|-------|-------------|-------|-------------|-------|-------------|
| Wdr55  | -0,47 | 0,420942329 | -0,55 | 0,300832923 | 0,23  | 0,794522895 | 0,33  | 0,696558026 | -0,24 | 0,888182112 |
| Wdr59  | 0,38  | 0,412575527 | 0,12  | 0,787527418 | 0,32  | 0,737241227 | 0,02  | 0,985188901 | -0,17 | 0,868167014 |
| Wdr5b  | 0,83  | 0,553849378 | 0,25  | 0,855474571 | 0,04  | 0,967214231 | -0,92 | 0,308923754 | 0,11  | 0,947559952 |
| Wdr6   | -0,71 | 0,270642335 | -0,44 | 0,600177044 | 1,04  | 0,0981596   | 0,38  | 0,671348066 | -1,06 | 0,200801504 |
| Wdr60  | 0,5   | 0,326781036 | -0,04 | 0,98230594  | 0,35  | 0,598179126 | -1,8  | 0,037611998 | -1,09 | 0,232692564 |
| Wdr61  | 0,06  | 0,925449982 | -0,46 | 0,404812628 | 0,07  | 0,952424681 | 0,52  | 0,253294027 | -0,1  | 0,899561934 |
| Wdr62  | -0,59 | 0,269026142 | -0,69 | 0,182771552 | 0,26  | 0,767822182 | 1,46  | 0,037157499 | 0,15  | 0,872429951 |
| Wdr63  | -0,3  | 0,701086418 | 0,11  | 0,959209847 | 0,28  | 0,712697139 | -0,08 | 0,943143586 | 0,21  | 0,808077941 |
| Wdr64  | -0,02 | 0,979827119 | -0,2  | 0,898238238 | -0,28 | 0,681398968 | 0,11  | 0,857066028 | -0,05 | 0,965421285 |
| Wdr66  | 0,61  | 0,199966188 | -0,36 | 0,561488075 | -0,17 | 0,819410193 | 0,43  | 0,330202502 | 0,36  | 0,680340254 |
| Wdr7   | 0,09  | 0,937415031 | 0,48  | 0,262833667 | -0,82 | 0,264885341 | -0,03 | 0,973637901 | 0,51  | 0,467711492 |
| Wdr70  | 0,35  | 0,524475604 | -0,33 | 0,641792237 | -0,14 | 0,893858379 | 0,23  | 0,744773464 | -0,47 | 0,596092228 |
| Wdr72  | -0,21 | 0,730947422 | -0,13 | 0,930192503 | 0,13  | 0,909233941 | -0,45 | 0,41448158  | -0,39 | 0,510946331 |
| Wdr73  | 0,1   | 0,921652597 | -0,37 | 0,781665479 | -0,32 | 0,842767638 | 0,05  | 0,966834679 | 0,16  | 0,878967193 |
| Wdr74  | -0,41 | 0,460231397 | -0,3  | 0,670859269 | 0,41  | 0,453312132 | 0,34  | 0,434100348 | -0,1  | 0,904040121 |
| Wdr75  | -0,57 | 0,610662221 | -0,33 | 0,629493333 | 0,94  | 0,424701978 | 0,38  | 0,437773588 | 0,25  | 0,731641995 |
| Wdr76  | -1,13 | 0,285061939 | -0,83 | 0,370515616 | 0,85  | 0,665514797 | 1,19  | 0,190726804 | -0,04 | 0,982422915 |
| Wdr77  | -1,29 | 0,147880323 | -0,69 | 0,302845725 | 0,63  | 0,200488648 | 0,92  | 0,112357983 | -0,02 | 0,986418729 |
| Wdr78  | 0,2   | 0,882539359 | -0,42 | 0,781665479 | -0,07 | 0,964509282 | -0,23 | 0,768817161 | -0,35 | 0,456564217 |
| Wdr81  | 0,01  | 0,995438679 | -0,1  | 0,901321339 | 0,08  | 0,930645703 | -0,81 | 0,039996125 | -0,61 | 0,374616846 |
| Wdr82  | -0,14 | 0,803737003 | -0,1  | 0,902637648 | -0,3  | 0,75990504  | -0,12 | 0,799176054 | -0,08 | 0,91314596  |
| Wdr83  | -0,37 | 0,579444251 | -0,14 | 0,816121519 | -0,31 | 0,594211231 | -0,09 | 0,90300812  | -0,3  | 0,77006342  |
| Wdr86  | 0,17  | 0,687662951 | -0,07 | 0,916822926 | 0,42  | 0,372662558 | 0,21  | 0,630728779 | 0,16  | 0,792404969 |
| Wdr88  | 0,05  | 0,947474694 | -0,26 | 0,682018994 | 0,21  | 0,659694447 | 0,26  | 0,408833757 | 0,16  | 0,836094333 |
| Wdr89  | -0,32 | 0,811215544 | -0,59 | 0,704681588 | -0,01 | 0,997394645 | 0,12  | 0,903284702 | -0,56 | 0,486708315 |
| Wdr90  | -0,22 | 0,810208393 | -0,37 | 0,506383744 | 0,12  | 0,911601881 | 0,4   | 0,603379381 | -0,44 | 0,668411245 |
| Wdr91  | 0,03  | 0,97952009  | -0,19 | 0,794404033 | 0,46  | 0,57717258  | 0,05  | 0,947551542 | -0,31 | 0,722556176 |
| Wdr92  | 0,56  | 0,67806773  | -0,67 | 0,664787536 | 0,16  | 0,888377256 | 1,24  | 0,263895667 | -0,03 | 0,988314991 |
| Wdr93  | 0,06  | 0,93113484  | 0,17  | 0,839636434 | -0,17 | 0,795235368 | -0,01 | 0,985865561 | -0,06 | 0,949751787 |
| Wdr95  | -0,18 | 0,875555348 | -0,32 | 0,732044571 | -0,25 | 0,761861872 | -0,01 | 0,996074006 | -0,07 | 0,967860497 |
| Wdsub1 | -0,67 | 0,501682835 | 0,38  | 0,483020336 | 0,06  | 0,956894731 | -1,43 | 0,025040776 | -0,51 | 0,347905594 |
| Wdte1  | -0,42 | 0,460654094 | -0,53 | 0,449152601 | 0,66  | 0,502343952 | -0,45 | 0,155687636 | -0,83 | 0,089607313 |
| Wdyhv1 | 0,02  | 0,978170903 | -0,35 | 0,818072947 | -0,42 | 0,648438146 | -0,17 | 0,839333217 | -0,24 | 0,825311688 |
| Wee1   | -0,66 | 0,553849378 | -0,36 | 0,837035571 | -0,21 | 0,80335039  | -0,15 | 0,658866873 | -0,74 | 0,468672987 |
| Wee2   | 0,12  | 0,84900712  | 0,01  | 0,993789602 | -0,28 | 0,664130139 | -0,08 | 0,892186579 | 0,01  | 0,992370267 |

|         |       |             |       |             |       |             |       |             |       |             |
|---------|-------|-------------|-------|-------------|-------|-------------|-------|-------------|-------|-------------|
| Wfdc1   | -0,19 | 0,828332985 | -0,05 | 0,964205869 | 0,18  | 0,88187364  | -2,57 | 0,018915917 | -0,93 | 0,328817797 |
| Wfdc10  | 0,16  | 0,701627731 | 0,11  | 0,82827759  | -0,05 | 0,948637233 | 0,02  | 0,981203009 | -0,28 | 0,641928139 |
| Wfdc11  | -0,24 | 0,784951771 | -0,23 | 0,856242883 | -0,32 | 0,811669636 | 0     | 1           | -0,22 | 0,888141972 |
| Wfdc12  | 0,01  | 0,995491315 | 0,35  | 0,669354789 | -0,03 | 0,976092199 | -0,15 | 0,754339703 | 0,21  | 0,855829359 |
| Wfdc13  | 0,1   | 0,87282087  | 0,12  | 0,847885195 | -0,13 | 0,819233039 | 0,06  | 0,906178596 | 0,05  | 0,953883081 |
| Wfdc15a | 0,05  | 0,948926586 | 0,22  | 0,639498475 | -0,12 | 0,877366773 | -0,34 | 0,378056559 | -0,13 | 0,848977077 |
| Wfdc15b | 0,27  | 0,757032046 | -0,02 | 0,989873399 | -0,1  | 0,882540073 | -3,5  | 0,01607134  | -0,47 | 0,655956123 |
| Wfdc16  | 0,7   | 0,22000732  | 0,1   | 0,88741189  | -0,38 | 0,70635953  | 0,31  | 0,600519686 | 0,4   | 0,512907543 |
| Wfdc17  | 0,04  | 0,975108898 | 0,01  | 0,999395995 | 0,6   | 0,560376292 | -0,09 | 0,96366591  | 0,3   | 0,675282484 |
| Wfdc18  | 0,27  | 0,516132409 | -0,3  | 0,453958512 | -0,39 | 0,520931071 | 0,53  | 0,111635568 | 0,15  | 0,836205142 |
| Wfdc2   | 0,19  | 0,791021845 | 0,04  | 0,966717367 | -0,02 | 0,985849814 | -1,1  | 0,041615252 | 0,13  | 0,887719506 |
| Wfdc21  | 0,19  | 0,741974321 | 0     | 1           | 1,89  | 0,12691088  | -0,03 | 0,969016842 | -0,16 | 0,833049562 |
| Wfdc3   | -0,27 | 0,782889069 | -0,35 | 0,475079924 | -0,78 | 0,419537272 | 0,75  | 0,058564376 | 0,6   | 0,344052279 |
| Wfdc5   | 0,18  | 0,866989155 | -0,36 | 0,680570135 | 0,03  | 0,985326269 | 0,06  | 0,932315462 | 0,18  | 0,777805633 |
| Wfdc6a  | 0,36  | 0,595245851 | -0,13 | 0,927870953 | -0,33 | 0,719386001 | -0,44 | 0,50659543  | -0,93 | 0,309552724 |
| Wfdc6b  | -0,04 | 0,971245076 | 0,08  | 0,877265044 | 0,09  | 0,925417014 | 0,05  | 0,910913209 | 0,04  | 0,961406182 |
| Wfdc8   | 0,48  | 0,535013574 | 0,38  | 0,700846519 | -0,1  | 0,910060392 | 0,26  | 0,713579222 | 0,52  | 0,592460098 |
| Wfdc9   | -0,02 | 0,990352291 | 0,14  | 0,89034555  | -0,08 | 0,916403684 | -0,5  | 0,518969598 | -0,3  | 0,626176831 |
| Wfikkn1 | -0,08 | 0,914090929 | -0,23 | 0,652323754 | -0,33 | 0,628048897 | -0,08 | 0,87811903  | -0,8  | 0,155259138 |
| Wfikkn2 | -0,18 | 0,68423035  | -0,16 | 0,825192868 | -0,77 | 0,374422909 | 0,17  | 0,88335157  | -0,05 | 0,974553568 |
| Wfs1    | -0,48 | 0,469179532 | -0,08 | 0,948441665 | 1,1   | 0,302861841 | -0,51 | 0,66396234  | -0,18 | 0,917075631 |
| Whamm   | 0,34  | 0,357233557 | 0,3   | 0,716668427 | -0,46 | 0,317001071 | -0,02 | 0,981203009 | 0,14  | 0,844842508 |
| Whrn    | 0,04  | 0,963329626 | -0,17 | 0,832686271 | 0,29  | 0,64473731  | 0,03  | 0,970161197 | 0,33  | 0,673120647 |
| Whsc1   | -0,43 | 0,226007645 | -0,65 | 0,219241031 | 0,32  | 0,68573346  | 1,41  | 0,049678856 | 0,24  | 0,8244614   |
| Whsc111 | 0,13  | 0,783200207 | -0,1  | 0,881680797 | 0,32  | 0,635911877 | 0,36  | 0,63007404  | 0,19  | 0,84701421  |
| Wif1    | -0,05 | 0,924926388 | -0,18 | 0,816617486 | -0,21 | 0,691009366 | -0,14 | 0,87811903  | 0,34  | 0,726042963 |
| Wipf1   | -0,34 | 0,520609641 | -0,12 | 0,791143346 | 0,03  | 0,981728622 | 0,24  | 0,608625666 | -0,2  | 0,78512653  |
| Wipf2   | 0,28  | 0,673516656 | 0,59  | 0,262026824 | 0     | 0,997598048 | -0,17 | 0,810508503 | -0,62 | 0,422103696 |
| Wipf3   | 0,08  | 0,954648978 | -0,09 | 0,867265251 | 0,14  | 0,90672161  | -0,56 | 0,117501364 | 0,24  | 0,786434393 |
| Wipi1   | 0,04  | 0,935607349 | -0,39 | 0,619501651 | 0,67  | 0,186321498 | 1,54  | 0,164154995 | -0,43 | 0,734821787 |
| Wipi2   | -0,09 | 0,852363306 | -0,05 | 0,943504705 | 0,59  | 0,379638471 | 0,41  | 0,27199617  | -0,02 | 0,982718    |
| Wisp1   | -0,65 | 0,268112899 | -0,15 | 0,852461907 | 1,44  | 0,062420645 | 0,59  | 0,741452902 | -0,66 | 0,756418986 |
| Wisp2   | -0,02 | 0,984967814 | 0,01  | 0,994666786 | -0,34 | 0,734944001 | -0,27 | 0,635664904 | 0,07  | 0,960974478 |
| Wisp3   | -0,01 | 0,995091369 | 0,08  | 0,941339703 | -0,43 | 0,530318769 | -0,33 | 0,713435933 | -0,37 | 0,655912577 |
| Wiz     | -0,17 | 0,776139269 | 0,1   | 0,891099    | -0,01 | 0,993379272 | -0,59 | 0,192100746 | -0,39 | 0,461334294 |

|        |       |             |       |             |       |             |       |             |       |             |
|--------|-------|-------------|-------|-------------|-------|-------------|-------|-------------|-------|-------------|
| Wls    | -0,12 | 0,840218728 | -0,65 | 0,441593532 | 0,07  | 0,932577939 | -1,09 | 0,019559361 | -0,08 | 0,916173996 |
| Wnk1   | 0,25  | 0,592999225 | -0,1  | 0,805949528 | -0,24 | 0,647093717 | -0,22 | 0,511609847 | 0,06  | 0,94327736  |
| Wnk2   | 0,07  | 0,932067554 | 0,04  | 0,9860901   | -0,39 | 0,423885191 | -0,19 | 0,801091541 | -0,17 | 0,830813323 |
| Wnk3   | 0,34  | 0,628398333 | -0,18 | 0,679757061 | -0,01 | 0,990836784 | 0,02  | 0,987043519 | -0,06 | 0,961406182 |
| Wnk4   | -0,48 | 0,370779677 | -0,13 | 0,915282997 | -0,31 | 0,628048897 | -0,05 | 0,951221613 | -0,12 | 0,879072575 |
| Wnt1   | 0,21  | 0,640002115 | -0,12 | 0,875546225 | -0,41 | 0,404699128 | 0,4   | 0,466586615 | 0,1   | 0,915356549 |
| Wnt10a | 0,27  | 0,612186892 | -0,39 | 0,365968146 | 0,6   | 0,421258302 | 0,08  | 0,931428395 | -0,31 | 0,599124106 |
| Wnt10b | 0,71  | 0,428049245 | -0,32 | 0,756369219 | -0,52 | 0,38497941  | -0,32 | 0,692179512 | 0,04  | 0,973999815 |
| Wnt11  | 0,16  | 0,758136438 | 0,3   | 0,732834316 | -0,28 | 0,617613613 | -0,21 | 0,684247831 | -0,27 | 0,841160223 |
| Wnt16  | 0,27  | 0,634740228 | 0,31  | 0,514880019 | -0,23 | 0,65375211  | 0,1   | 0,849520464 | 0,47  | 0,359850349 |
| Wnt2   | -0,11 | 0,82191345  | -0,13 | 0,859954464 | 0,09  | 0,904537071 | -1,8  | 0,032929006 | -0,46 | 0,576452248 |
| Wnt2b  | -0,02 | 0,976495648 | -0,07 | 0,932292974 | 0,17  | 0,793050348 | 0,12  | 0,794100987 | 0,11  | 0,916489445 |
| Wnt3   | -0,14 | 0,7494877   | 0,34  | 0,550207979 | -0,41 | 0,37970041  | -0,1  | 0,914500436 | 0,21  | 0,861977667 |
| Wnt3a  | -0,15 | 0,913921068 | -0,22 | 0,612941322 | -0,17 | 0,867489743 | 0,1   | 0,846179094 | -0,19 | 0,851744744 |
| Wnt4   | -0,29 | 0,433492052 | -0,37 | 0,419795665 | 0,2   | 0,817818413 | -0,36 | 0,386868809 | -0,87 | 0,155716667 |
| Wnt5a  | 0,37  | 0,445207046 | -0,05 | 0,954024651 | -0,06 | 0,964695682 | -0,01 | 0,993704041 | -0,28 | 0,752497404 |
| Wnt5b  | 0,08  | 0,925510521 | 0,44  | 0,600177044 | -0,07 | 0,940550094 | 0,28  | 0,595943686 | 0,38  | 0,498553997 |
| Wnt6   | 0,2   | 0,83325465  | -0,26 | 0,738762579 | -0,04 | 0,96500395  | 0,04  | 0,953222061 | 0,07  | 0,928671864 |
| Wnt7a  | 0,09  | 0,914758024 | 0,14  | 0,93451524  | 0,66  | 0,356121983 | 0,28  | 0,762553403 | 0,1   | 0,890957032 |
| Wnt7b  | 0,29  | 0,686076441 | 0,15  | 0,809248387 | 0,71  | 0,186321498 | -0,24 | 0,726560696 | 0,05  | 0,972590168 |
| Wnt8a  | -0,18 | 0,701391957 | 0,01  | 0,996259587 | -0,13 | 0,917672398 | 0,19  | 0,658011013 | 0,25  | 0,681597394 |
| Wnt8b  | 0,09  | 0,907391935 | -0,15 | 0,842430108 | 0,01  | 0,990836784 | -0,05 | 0,939576087 | -0,17 | 0,826847432 |
| Wnt9a  | 0,19  | 0,803761785 | 0,35  | 0,564634931 | 0,3   | 0,557268968 | -0,07 | 0,924534789 | 0,26  | 0,673497091 |
| Wnt9b  | -0,26 | 0,70841898  | -0,02 | 0,991507752 | -0,06 | 0,937892242 | 0,28  | 0,644491109 | 0,11  | 0,936447878 |
| Wrap53 | -0,67 | 0,302609278 | -1,05 | 0,219055424 | 1,58  | 0,032673349 | 0,29  | 0,678068491 | -0,69 | 0,520240481 |
| Wrap73 | 0,02  | 0,981669483 | 0,16  | 0,838485645 | 0,47  | 0,564288452 | -0,13 | 0,885958674 | 0,63  | 0,447019099 |
| Wrb    | -0,63 | 0,321600657 | -0,12 | 0,784390856 | 0,33  | 0,864411302 | -0,01 | 0,974617862 | -0,2  | 0,711637936 |
| Wrn    | 0,31  | 0,47707835  | 0,79  | 0,188301476 | -0,4  | 0,757498725 | -0,33 | 0,438313935 | 0,44  | 0,387681311 |
| Wrnip1 | -0,23 | 0,7738386   | -0,5  | 0,219055424 | -0,28 | 0,622546805 | 0,54  | 0,137848361 | 0,09  | 0,918897359 |
| Wsb1   | 0,28  | 0,484960336 | 0,41  | 0,310525594 | -0,18 | 0,856046789 | -0,05 | 0,967405057 | 0,35  | 0,745574572 |
| Wsb2   | -0,08 | 0,890084566 | -0,12 | 0,802788292 | 0,04  | 0,969570532 | 1,07  | 0,022522121 | 0,03  | 0,979152939 |
| Wscd1  | -1,17 | 0,074890017 | -0,76 | 0,242002134 | 0,16  | 0,864004194 | -0,32 | 0,342324861 | -0,79 | 0,070864778 |
| Wscd2  | 0,1   | 0,850685339 | 0,21  | 0,654621987 | -0,45 | 0,366384165 | -0,18 | 0,736730464 | 0,13  | 0,856309792 |
| Wt1    | 0,14  | 0,840909921 | -0,17 | 0,732847182 | -0,18 | 0,846689137 | 0,24  | 0,647682542 | -0,2  | 0,81375759  |
| Wt1os  | 0,08  | 0,893125265 | 0     | 1           | -0,02 | 0,984778342 | -0,57 | 0,494887206 | 0,22  | 0,787488862 |

|       |       |             |       |             |       |             |       |             |       |             |
|-------|-------|-------------|-------|-------------|-------|-------------|-------|-------------|-------|-------------|
| Wtap  | -0,34 | 0,773258372 | -0,04 | 0,972336944 | 0,14  | 0,872313115 | 0,01  | 0,983166423 | 0,1   | 0,905753594 |
| Wtip  | 0,02  | 0,9852886   | 0,06  | 0,966668383 | -0,33 | 0,543291636 | -0,91 | 0,220883241 | -1,07 | 0,063347582 |
| Wwc1  | -0,13 | 0,899660614 | 0,2   | 0,893340254 | 1,06  | 0,224747376 | -0,6  | 0,191690951 | 0,47  | 0,422263547 |
| Wwc2  | -0,03 | 0,966775766 | -0,15 | 0,707524747 | 0,35  | 0,689795081 | -0,41 | 0,258540102 | -0,4  | 0,529128921 |
| Wwox  | -0,21 | 0,674403127 | -0,13 | 0,903504389 | -0,17 | 0,856046789 | 0,05  | 0,932454025 | -0,51 | 0,266832581 |
| Wwp1  | -0,39 | 0,579630863 | -0,6  | 0,424068004 | 0,72  | 0,198762674 | -0,74 | 0,073275563 | -0,38 | 0,45660227  |
| Wwp2  | -0,18 | 0,778869381 | 0     | 1           | -0,16 | 0,799586974 | -0,59 | 0,439173785 | -0,1  | 0,913553402 |
| Wwtr1 | 0,21  | 0,597519827 | -0,16 | 0,746204894 | -0,34 | 0,6348675   | 0,88  | 0,04637489  | -0,16 | 0,817563348 |
| Xab2  | 0,05  | 0,937622935 | -0,12 | 0,824372931 | 0,25  | 0,743652947 | -0,35 | 0,267217938 | 0,09  | 0,895579031 |
| Xaf1  | 0,82  | 0,179751021 | 0,8   | 0,277253387 | -1    | 0,045360114 | -1,21 | 0,021172356 | 0,4   | 0,411909918 |
| Xbp1  | -0,02 | 0,966775766 | 0,01  | 0,990380046 | 0,19  | 0,71593256  | 0,47  | 0,156195724 | 0,12  | 0,864166878 |
| Xcl1  | -0,15 | 0,867243066 | -0,06 | 0,900801202 | 0,25  | 0,909975745 | -1,7  | 0,167766415 | -1,01 | 0,538811506 |
| Xcr1  | 0,09  | 0,869565514 | -0,09 | 0,874448335 | -0,13 | 0,835611996 | 0,16  | 0,703281567 | 0,22  | 0,790143089 |
| Xdh   | 1,66  | 0,074890017 | 2,32  | 0,040620931 | -3,4  | 0,001316657 | -2,11 | 0,007965753 | 1,5   | 0,01012797  |
| Xiap  | -0,3  | 0,513299782 | -0,72 | 0,242323765 | -0,55 | 0,72132637  | 0,6   | 0,413519024 | 0,54  | 0,490248984 |
| Xirp1 | 0,11  | 0,931445059 | -0,13 | 0,859816636 | -0,01 | 0,993280531 | -0,53 | 0,171149061 | -0,07 | 0,941241684 |
| Xirp2 | -0,07 | 0,935644409 | -0,17 | 0,906631077 | -0,35 | 0,477461651 | 0,41  | 0,63252606  | 0,13  | 0,869831411 |
| Xist  | 0,12  | 0,831697563 | -0,14 | 0,764289173 | 0,05  | 0,968677508 | -0,04 | 0,919062567 | -0,39 | 0,394654462 |
| Xk    | 1,61  | 0,016666769 | 1,85  | 0,087315688 | -0,76 | 0,151352948 | -0,15 | 0,870113725 | -0,36 | 0,687514851 |
| Xkr4  | 0,4   | 0,523556522 | 0,06  | 0,935984823 | 0,17  | 0,823396412 | -0,04 | 0,922740736 | 0,03  | 0,976743304 |
| Xkr5  | 0,17  | 0,771252343 | -0,3  | 0,533646692 | -0,12 | 0,841563482 | 0,4   | 0,342459451 | -0,31 | 0,707962968 |
| Xkr6  | -0,55 | 0,362306469 | 0,72  | 0,574767565 | -0,4  | 0,465949919 | -0,31 | 0,785996319 | 0,08  | 0,960974478 |
| Xkr7  | 0,21  | 0,718904956 | 0,15  | 0,788759447 | 0,23  | 0,76370647  | 0,48  | 0,504754586 | 0,04  | 0,977967676 |
| Xkr8  | -0,06 | 0,930846275 | 0,34  | 0,571092292 | -0,37 | 0,58160408  | -0,05 | 0,941644811 | 0,26  | 0,725669526 |
| Xkr9  | -0,19 | 0,717407143 | 0,15  | 0,818072947 | 0,01  | 0,997268369 | 0,05  | 0,931392535 | 0,16  | 0,828288883 |
| Xkrx  | -0,29 | 0,553849378 | 0,13  | 0,849399044 | -0,09 | 0,890842571 | -0,15 | 0,729392851 | 0,08  | 0,916625149 |
| Xlr   | -0,04 | 0,964154899 | 0,32  | 0,794404033 | 0,62  | 0,360171267 | -0,2  | 0,857884225 | 0,07  | 0,960108878 |
| Xlr3a | -0,28 | 0,744679935 | 0,14  | 0,891393919 | 0,15  | 0,889371168 | -0,2  | 0,719257786 | -0,46 | 0,414033358 |
| Xlr3b | 0,71  | 0,582837718 | -0,18 | 0,925723924 | -0,8  | 0,335127479 | 0,38  | 0,740451724 | 0,65  | 0,710368081 |
| Xlr3c | 0,86  | 0,302609278 | 0,29  | 0,900338519 | -0,66 | 0,545010185 | -0,78 | 0,260503826 | 0,32  | 0,823098095 |
| Xlr4a | 0,29  | 0,685972631 | 0,5   | 0,781665479 | -0,82 | 0,456805299 | -1,05 | 0,139364796 | 1,01  | 0,122922652 |
| Xlr5a | 0,64  | 0,36631183  | 0,4   | 0,520255546 | -0,62 | 0,593642513 | -0,02 | 0,987229847 | 0,5   | 0,794054354 |
| Xlr5b | -0,08 | 0,944121268 | 0,08  | 0,937424389 | -0,07 | 0,960666071 | -0,04 | 0,970247298 | -0,01 | 0,991628025 |
| Xndc1 | -0,16 | 0,895400682 | 0,42  | 0,60864972  | 0,45  | 0,715497532 | -0,74 | 0,565335362 | -0,45 | 0,785294197 |
| Xpa   | -0,78 | 0,269151748 | -0,16 | 0,940525711 | -0,05 | 0,975686446 | -0,24 | 0,804362093 | -0,01 | 0,991628025 |



|          |       |             |       |             |       |             |       |             |       |             |
|----------|-------|-------------|-------|-------------|-------|-------------|-------|-------------|-------|-------------|
| Xpc      | -0,25 | 0,663447662 | -0,07 | 0,941705846 | 0,27  | 0,870184236 | -0,66 | 0,283974903 | -1,11 | 0,145471772 |
| Xpnpep1  | -0,38 | 0,362306469 | -0,41 | 0,466238885 | 0,09  | 0,899136251 | 0,79  | 0,165885593 | -0,59 | 0,312830548 |
| Xpnpep2  | 0     | 0,998769353 | -0,48 | 0,618087796 | -0,05 | 0,960650487 | 0,32  | 0,573662795 | -0,19 | 0,780418062 |
| Xpnpep3  | -0,43 | 0,54401985  | -0,62 | 0,646170664 | 0,72  | 0,388931947 | 0,42  | 0,667408547 | -0,14 | 0,929962198 |
| Xpo1     | -0,62 | 0,339433887 | -0,33 | 0,747928263 | -0,13 | 0,917108186 | 0,11  | 0,933553186 | -0,22 | 0,831815586 |
| Xpo4     | -0,19 | 0,719130558 | -0,78 | 0,391911674 | 0,48  | 0,646206018 | 0,51  | 0,439928303 | -0,32 | 0,628999683 |
| Xpo5     | -0,52 | 0,346039644 | -0,05 | 0,93451524  | 0,81  | 0,140802581 | 0,18  | 0,580312555 | -0,13 | 0,851207222 |
| Xpo6     | 0,07  | 0,914090929 | -0,25 | 0,602601189 | -0,13 | 0,891365932 | 0,66  | 0,059011691 | 0,02  | 0,981913783 |
| Xpo7     | 0,21  | 0,707502054 | -0,35 | 0,456432716 | 0,45  | 0,507058256 | 0,01  | 0,990392071 | -0,26 | 0,656299574 |
| Xpot     | -0,66 | 0,489108813 | -0,36 | 0,809772798 | 0,46  | 0,701109737 | 0,15  | 0,828644629 | -0,38 | 0,612061926 |
| Xpr1     | -0,13 | 0,808882471 | 0,08  | 0,912137323 | 0,66  | 0,265688162 | -0,51 | 0,229401849 | -0,48 | 0,34118587  |
| Xrcc1    | -0,29 | 0,573488393 | -0,33 | 0,48206644  | 0,26  | 0,669548016 | 0,4   | 0,272309285 | -0,05 | 0,966288748 |
| Xrcc2    | -0,49 | 0,612186892 | -0,42 | 0,694725971 | 0,38  | 0,560191012 | 0,08  | 0,962871535 | 0,21  | 0,904636459 |
| Xrcc3    | -0,46 | 0,486906643 | -0,18 | 0,902830091 | 0,23  | 0,712697139 | 0,35  | 0,523442241 | -0,79 | 0,244183551 |
| Xrcc4    | 0,32  | 0,782499831 | 0,38  | 0,762657778 | 0,98  | 0,207797844 | -0,09 | 0,929073978 | -0,13 | 0,947437555 |
| Xrcc5    | -1,89 | 0,089531229 | -1,39 | 0,231055627 | 0,67  | 0,435556279 | -0,25 | 0,831252023 | 0,14  | 0,91339829  |
| Xrcc6    | -0,58 | 0,41815235  | -0,64 | 0,341083995 | 0,52  | 0,537671687 | 0,56  | 0,451933362 | -1,02 | 0,268639901 |
| Xrcc6bp1 | -0,03 | 0,987170782 | -0,41 | 0,629397507 | 0,74  | 0,512398053 | 0,57  | 0,313701653 | -0,01 | 0,991628025 |
| Xrn1     | 0,1   | 0,88948467  | 0,33  | 0,420485441 | -0,42 | 0,665514797 | -0,43 | 0,212666842 | 0,56  | 0,210816646 |
| Xrn2     | -0,2  | 0,712446214 | -0,07 | 0,932292974 | -0,08 | 0,935488673 | 0,34  | 0,425042031 | 0,18  | 0,770308019 |
| Xrra1    | 0,2   | 0,808947569 | 0,29  | 0,723594605 | -0,08 | 0,91596537  | -0,32 | 0,475226389 | -0,21 | 0,746799932 |
| Xxylt1   | -0,13 | 0,854588321 | 0,13  | 0,89081665  | 1,38  | 0,231640032 | -0,12 | 0,810891431 | -1,08 | 0,40189401  |
| Xylb     | 0,49  | 0,476072345 | 0,2   | 0,761404909 | -0,06 | 0,95907725  | -0,36 | 0,454377175 | -0,22 | 0,842569065 |
| Xylt1    | -0,28 | 0,64499665  | -0,28 | 0,694759677 | 0,04  | 0,977897176 | 3,48  | 0,003009221 | -1,12 | 0,135418412 |
| Xylt2    | -0,96 | 0,552300521 | -0,33 | 0,746998924 | 0,64  | 0,605363924 | 0,01  | 0,993456467 | -0,16 | 0,821140509 |
| Yae1d1   | 0,14  | 0,80941122  | -0,32 | 0,802979985 | -0,17 | 0,868451584 | -0,97 | 0,229392527 | -0,18 | 0,788761628 |
| Yaf2     | -0,39 | 0,62403153  | -0,3  | 0,632414396 | -0,36 | 0,58699516  | 1,05  | 0,139736872 | -0,02 | 0,987603478 |
| Yap1     | 0,23  | 0,663119768 | 0,54  | 0,268436493 | -0,17 | 0,79541037  | -0,34 | 0,351862282 | -0,02 | 0,983469081 |
| Yars     | 0,08  | 0,937370837 | 0,59  | 0,430154065 | -0,18 | 0,779428    | 0,3   | 0,55999753  | 0,47  | 0,469148703 |
| Yars2    | -0,02 | 0,983516046 | -0,23 | 0,707482114 | 0,26  | 0,831214914 | 0,76  | 0,133183454 | 0,23  | 0,75662761  |
| Ybey     | -0,22 | 0,634165685 | -0,16 | 0,900441037 | -0,11 | 0,91291518  | -0,3  | 0,706619788 | -0,03 | 0,982175252 |
| Ybx1     | -0,22 | 0,577809864 | -0,3  | 0,544380607 | 0,15  | 0,765783874 | 0,54  | 0,14945306  | 0,21  | 0,697757911 |
| Ybx2     | 0,76  | 0,187439983 | 0,74  | 0,468035796 | 0,26  | 0,676675094 | -0,73 | 0,444041732 | -0,34 | 0,825272094 |
| Ybx3     | -0,46 | 0,277692472 | -0,48 | 0,297762088 | 0,4   | 0,527929204 | 0,57  | 0,137669798 | -0,06 | 0,933759514 |
| Ydjc     | 0,13  | 0,895585982 | -0,1  | 0,880107273 | -0,32 | 0,505254379 | 0,45  | 0,198716114 | -0,6  | 0,205235667 |

|        |       |             |       |             |       |             |       |             |       |             |
|--------|-------|-------------|-------|-------------|-------|-------------|-------|-------------|-------|-------------|
| Yeats2 | -0,27 | 0,764288636 | -0,29 | 0,666450149 | 0,35  | 0,661089127 | 0,41  | 0,351428925 | -0,33 | 0,612920986 |
| Yeats4 | -0,2  | 0,738714467 | 0,24  | 0,708684603 | 0,06  | 0,946665322 | 0,11  | 0,859914509 | -0,08 | 0,917844354 |
| Yes1   | -0,5  | 0,164604058 | -0,33 | 0,794404033 | 1,06  | 0,239152738 | 0,72  | 0,315007821 | 0,06  | 0,968130547 |
| Yif1a  | -0,38 | 0,463168964 | 0,02  | 0,987282412 | 0,28  | 0,742862028 | 0,28  | 0,397361621 | 0,19  | 0,741681074 |
| Yif1b  | 0,03  | 0,959218841 | -0,39 | 0,428798015 | 0,74  | 0,260663465 | -0,33 | 0,428855564 | -0,37 | 0,508153495 |
| Yipf1  | 0,06  | 0,937129467 | 0,18  | 0,697354745 | 0,48  | 0,433682567 | 0,22  | 0,687560664 | 0,22  | 0,751494143 |
| Yipf2  | 0,57  | 0,221240269 | 0,05  | 0,946843873 | 0,1   | 0,887630371 | -0,66 | 0,384120617 | -0,25 | 0,797293554 |
| Yipf3  | -0,25 | 0,575756156 | -0,02 | 0,981411052 | 0,14  | 0,902637441 | 0,3   | 0,465031303 | -0,34 | 0,564485034 |
| Yipf4  | 0,51  | 0,410773729 | -0,04 | 0,988550087 | 0,01  | 0,99394877  | -0,44 | 0,441112475 | 0,35  | 0,641928139 |
| Yipf5  | 0,04  | 0,960597621 | -0,07 | 0,926157704 | 0,49  | 0,30742781  | 1,06  | 0,054445933 | 0,11  | 0,890957032 |
| Yipf6  | -0,32 | 0,510434756 | 0,1   | 0,906777728 | -0,36 | 0,712697139 | -0,23 | 0,702563225 | -0,09 | 0,92489713  |
| Yipf7  | 0,22  | 0,900079681 | 0,25  | 0,655302559 | 0,09  | 0,930069312 | -0,02 | 0,982117419 | 0,32  | 0,730289864 |
| Yjefn3 | -0,42 | 0,389158073 | -0,3  | 0,525576575 | 0,26  | 0,714796589 | 0,05  | 0,92123654  | -0,06 | 0,941798006 |
| Ykt6   | -0,03 | 0,96097593  | -0,15 | 0,777369073 | 0,4   | 0,591475381 | 0,87  | 0,239653037 | -0,28 | 0,767960772 |
| Ylpm1  | -0,52 | 0,15490509  | -0,11 | 0,841398333 | 0,26  | 0,715497532 | 0,05  | 0,922338609 | -0,16 | 0,795033998 |
| Yme111 | -0,02 | 0,98225675  | -0,2  | 0,660058778 | 0,26  | 0,839034159 | 0,02  | 0,963465533 | 0,04  | 0,961749007 |
| Yod1   | 0,46  | 0,373844376 | 0,06  | 0,963369162 | -0,17 | 0,901816517 | 0,18  | 0,830741954 | 0,61  | 0,363378859 |
| Ypel1  | 0,11  | 0,926316023 | -1,02 | 0,330707782 | 0,84  | 0,235612389 | 0,18  | 0,854342596 | -0,66 | 0,551972106 |
| Ypel2  | 0,54  | 0,412607475 | -0,49 | 0,561562373 | -0,01 | 0,993379272 | 2,18  | 0,021172356 | -0,25 | 0,851143481 |
| Ypel3  | -0,01 | 0,994165645 | 0     | 1           | -0,28 | 0,68573346  | -0,95 | 0,070652116 | -0,67 | 0,169311853 |
| Ypel4  | 0,69  | 0,097625832 | -0,16 | 0,859954464 | -0,11 | 0,918291931 | 0,56  | 0,16321411  | -0,1  | 0,896355106 |
| Ypel5  | 0,43  | 0,270547821 | 0,6   | 0,296979243 | -0,16 | 0,764964006 | -0,22 | 0,68709897  | 0,55  | 0,393448838 |
| Yrdc   | -0,48 | 0,597519827 | -0,5  | 0,424068004 | -0,07 | 0,956340132 | 1,04  | 0,219519453 | 0,14  | 0,923040447 |
| Ythdc1 | 0,25  | 0,544582488 | 0,13  | 0,792112243 | 0     | 0,996260936 | -0,17 | 0,659461543 | 0,6   | 0,176186731 |
| Ythdc2 | 0,12  | 0,897583596 | -0,1  | 0,972374516 | 0,26  | 0,899387868 | -0,22 | 0,816899875 | -0,23 | 0,836061657 |
| Ythdf1 | -0,04 | 0,959044734 | 0,15  | 0,807463629 | 0,58  | 0,260587376 | 0,08  | 0,940292598 | -0,22 | 0,825871709 |
| Ythdf2 | 0,12  | 0,884507763 | 0,11  | 0,887493001 | -0,05 | 0,982305856 | 0,36  | 0,71383199  | 0,35  | 0,835191    |
| Ythdf3 | 0,25  | 0,727972319 | -0,12 | 0,843162191 | -0,15 | 0,881318437 | 1,09  | 0,042479765 | 0,25  | 0,813878315 |
| Ywhab  | -0,11 | 0,803557792 | -0,24 | 0,51825831  | 0,55  | 0,342804036 | 0,49  | 0,353241029 | 0,14  | 0,879485813 |
| Ywhae  | -0,22 | 0,541417213 | -0,07 | 0,882589938 | 0,22  | 0,617139025 | 0,12  | 0,730274025 | 0,06  | 0,932846639 |
| Ywhag  | -0,18 | 0,646878637 | 0,15  | 0,722938629 | -0,13 | 0,868054401 | 0,73  | 0,056397205 | 0,34  | 0,549181666 |
| Ywhah  | 0,07  | 0,882943798 | 0,23  | 0,678357594 | 0     | 0,998565782 | 0,13  | 0,718433562 | 0,19  | 0,765809384 |
| Ywhaq  | -0,07 | 0,92069393  | 0,48  | 0,271257402 | 0,13  | 0,835772439 | 0,15  | 0,664421412 | 0,17  | 0,787061733 |
| Ywhaz  | -0,13 | 0,766898048 | -0,16 | 0,776548278 | 0,07  | 0,927950027 | 0,63  | 0,321981709 | 0,19  | 0,840036408 |
| Yy1    | -0,02 | 0,968636377 | 0,22  | 0,76847744  | 0,14  | 0,846176253 | -0,06 | 0,911258809 | 0,38  | 0,468672987 |

|           |       |             |       |             |       |             |       |             |       |             |
|-----------|-------|-------------|-------|-------------|-------|-------------|-------|-------------|-------|-------------|
| Yy2       | -0,44 | 0,66331039  | -0,06 | 0,972706967 | 0,22  | 0,873329692 | 0,64  | 0,294661776 | 0,76  | 0,272406804 |
| Zadh2     | -0,07 | 0,959714813 | -0,1  | 0,832841509 | 0,68  | 0,13589176  | -0,84 | 0,197856917 | -0,41 | 0,567590783 |
| Zak       | -0,57 | 0,314729119 | -0,63 | 0,467362999 | 0,5   | 0,433481425 | 1,22  | 0,116706163 | -0,82 | 0,337492586 |
| Zan       | 0,2   | 0,742823915 | -0,14 | 0,812406561 | -0,09 | 0,894018349 | 0,07  | 0,891790388 | 0,08  | 0,923846654 |
| Zap70     | -0,36 | 0,546826053 | -0,02 | 0,989873399 | -0,37 | 0,585672186 | -1    | 0,10398546  | 0,14  | 0,890833196 |
| Zar1      | -0,72 | 0,157853388 | -0,18 | 0,873640843 | 0,96  | 0,303023024 | 0,81  | 0,50659543  | 0,08  | 0,973382116 |
| Zar1l     | 0,18  | 0,740324615 | 0,21  | 0,701043773 | 0,05  | 0,956570063 | -0,07 | 0,931477012 | -0,12 | 0,899797564 |
| Zbbx      | 0,12  | 0,88090997  | -0,44 | 0,424863079 | -0,41 | 0,460955903 | 0,47  | 0,32245101  | 0,38  | 0,593298551 |
| Zbed3     | -0,41 | 0,316599006 | -0,15 | 0,872690378 | -0,39 | 0,478782868 | 0,42  | 0,331328372 | -0,44 | 0,579869722 |
| Zbed4     | -0,19 | 0,775296013 | 0,19  | 0,852461907 | -0,04 | 0,984778342 | 0,82  | 0,277445847 | 0,24  | 0,864257719 |
| Zbed5     | -0,67 | 0,272587269 | -0,5  | 0,771278839 | -0,06 | 0,953917674 | 0,51  | 0,548063783 | 0,06  | 0,959573673 |
| Zbp1      | 1,43  | 0,153132474 | 1,05  | 0,068264599 | -1,77 | 0,004992193 | 1,1   | 0,039454495 | 1,76  | 0,006571912 |
| Zbtb1     | -0,4  | 0,552995103 | 0,22  | 0,738762579 | 0,67  | 0,379638471 | 0,6   | 0,736730464 | -0,06 | 0,980961333 |
| Zbtb10    | -0,03 | 0,975788214 | 0,84  | 0,141157706 | 0,33  | 0,721083003 | -0,18 | 0,776545078 | -0,64 | 0,442579293 |
| Zbtb11    | -0,54 | 0,680520303 | 0,06  | 0,965796793 | -0,52 | 0,405394696 | -0,02 | 0,979829655 | -0,02 | 0,991206114 |
| Zbtb11os1 | -0,06 | 0,943079514 | -0,1  | 0,847885195 | -0,12 | 0,887782273 | -0,21 | 0,592457782 | -0,24 | 0,68987325  |
| Zbtb12    | 0,02  | 0,98456417  | -0,64 | 0,38209442  | -0,42 | 0,725191296 | 0,34  | 0,676659386 | 0,04  | 0,960974478 |
| Zbtb14    | -0,39 | 0,74552063  | -0,25 | 0,662134711 | 1,08  | 0,411893403 | -1,04 | 0,065831648 | -0,44 | 0,479585604 |
| Zbtb16    | -0,6  | 0,375878015 | -0,84 | 0,223066162 | -0,66 | 0,648315091 | -3,68 | 0,003863434 | -3,64 | 0,002545536 |
| Zbtb17    | -0,19 | 0,774822327 | -0,26 | 0,617497649 | 0,29  | 0,65528516  | 1,19  | 0,029839725 | 0,35  | 0,635951679 |
| Zbtb18    | -0,03 | 0,964358894 | -0,29 | 0,696303123 | -0,5  | 0,476920529 | 0,19  | 0,695337192 | 0,4   | 0,689031841 |
| Zbtb2     | 0,17  | 0,683444889 | 0,42  | 0,418913373 | 0,02  | 0,991107468 | 0,07  | 0,967758979 | 0,12  | 0,946463658 |
| Zbtb20    | 0,07  | 0,905414735 | -0,02 | 0,984000632 | -0,13 | 0,815567598 | -1,18 | 0,028472437 | -0,14 | 0,828679046 |
| Zbtb21    | -0,37 | 0,758636946 | 0,06  | 0,969019461 | -0,26 | 0,781453168 | 0,53  | 0,446566698 | -0,16 | 0,890933993 |
| Zbtb22    | -0,17 | 0,690928973 | -0,06 | 0,926157704 | 0,35  | 0,479303047 | -0,36 | 0,47532893  | -0,39 | 0,498598092 |
| Zbtb24    | 0,49  | 0,564366449 | 0,35  | 0,602956592 | 0,3   | 0,778653031 | -0,24 | 0,757442222 | -0,06 | 0,955784619 |
| Zbtb25    | -0,21 | 0,777460994 | -0,51 | 0,65582744  | 0,15  | 0,894866237 | -0,42 | 0,359659301 | 0,13  | 0,840952901 |
| Zbtb26    | -0,05 | 0,965444591 | 0,34  | 0,783325809 | -0,5  | 0,621385343 | 0,37  | 0,672571582 | 0,35  | 0,761782208 |
| Zbtb3     | -0,05 | 0,960720096 | 0,45  | 0,582016856 | -0,45 | 0,571974018 | -0,39 | 0,558649561 | 0,21  | 0,90813354  |
| Zbtb32    | 0,12  | 0,810208393 | 0,08  | 0,912137323 | 0,26  | 0,779859477 | 0,15  | 0,686891365 | -0,1  | 0,911034257 |
| Zbtb33    | 0     | 1           | 0,28  | 0,667684858 | 0,01  | 0,997268369 | -0,09 | 0,857910103 | 0,17  | 0,818041383 |
| Zbtb34    | -0,33 | 0,787002876 | 0,41  | 0,724772268 | 0,21  | 0,913333366 | -0,38 | 0,468765073 | -0,55 | 0,400303226 |
| Zbtb37    | -0,2  | 0,720829271 | -0,13 | 0,781665479 | 0,23  | 0,826072965 | 0,1   | 0,841769276 | 0,53  | 0,366079495 |
| Zbtb38    | -0,68 | 0,218444456 | -0,29 | 0,638366221 | 0,35  | 0,580962367 | 0,43  | 0,450283107 | 0,17  | 0,844105751 |
| Zbtb39    | -0,17 | 0,763270657 | 0,3   | 0,68486263  | -0,09 | 0,908390194 | -0,57 | 0,285810975 | 0,05  | 0,953297732 |

|         |       |             |       |             |       |             |       |             |       |             |
|---------|-------|-------------|-------|-------------|-------|-------------|-------|-------------|-------|-------------|
| Zbtb4   | -0,29 | 0,597519827 | 0,03  | 0,973112447 | -0,07 | 0,929272323 | -0,51 | 0,290272891 | 0,03  | 0,979152939 |
| Zbtb40  | 0,25  | 0,615064142 | 0,09  | 0,908690899 | -0,04 | 0,962216849 | 0,14  | 0,748929665 | -0,3  | 0,66855342  |
| Zbtb41  | 0,35  | 0,682102965 | 0,16  | 0,79526023  | 0,46  | 0,548288344 | 0,32  | 0,443238713 | 0,72  | 0,128226867 |
| Zbtb42  | 0,19  | 0,760660571 | 0,11  | 0,804868131 | -0,07 | 0,929898564 | 0,41  | 0,320957723 | 0,13  | 0,881943508 |
| Zbtb43  | 0,6   | 0,225716868 | -0,59 | 0,683761476 | 0,5   | 0,847223474 | 0,61  | 0,593913827 | -0,59 | 0,809335788 |
| Zbtb44  | -0,07 | 0,964216121 | -0,91 | 0,377007015 | 0,62  | 0,783006    | 0,19  | 0,64875897  | -0,12 | 0,88146483  |
| Zbtb45  | -0,84 | 0,453709151 | -0,4  | 0,568187167 | 0,45  | 0,654281993 | -0,27 | 0,676020276 | -0,69 | 0,633381473 |
| Zbtb46  | -0,16 | 0,902675112 | -0,35 | 0,583200444 | 0,34  | 0,671680785 | -0,47 | 0,437087824 | 0,23  | 0,83296791  |
| Zbtb48  | 0,15  | 0,864400092 | -0,15 | 0,868538818 | 0,51  | 0,688643408 | -0,16 | 0,767703032 | -0,28 | 0,735152891 |
| Zbtb49  | 0,35  | 0,697356307 | 0,36  | 0,680709276 | 0,25  | 0,786838878 | -0,85 | 0,236774759 | 0,22  | 0,830813323 |
| Zbtb5   | 0,59  | 0,586458491 | 0,24  | 0,605851161 | 0,03  | 0,975866042 | 0,24  | 0,772464056 | 0,98  | 0,206819215 |
| Zbtb6   | -0,03 | 0,9852886   | -0,15 | 0,816938367 | 0,83  | 0,164746948 | -0,24 | 0,60204354  | 0,03  | 0,975441362 |
| Zbtb7a  | -0,42 | 0,470166881 | 0,21  | 0,735689605 | 0,37  | 0,608702079 | -0,2  | 0,688152796 | 0,15  | 0,828278125 |
| Zbtb7b  | 0,11  | 0,930612466 | 0,38  | 0,808498635 | -0,17 | 0,915447788 | -0,96 | 0,303773954 | -0,09 | 0,957130917 |
| Zbtb7c  | -0,54 | 0,472993837 | -0,08 | 0,901000778 | 0,23  | 0,712697139 | -1,35 | 0,020805477 | 0,22  | 0,715300768 |
| Zbtb8a  | -0,07 | 0,946411755 | 0,28  | 0,873628464 | 1,09  | 0,076696168 | -1,35 | 0,107563158 | -0,28 | 0,606745732 |
| Zbtb8b  | 0,35  | 0,540296693 | 0,24  | 0,715688609 | -0,14 | 0,865318296 | 0     | 1           | -0,07 | 0,956755884 |
| Zbtb8os | -0,21 | 0,651352627 | -0,28 | 0,728083849 | 1     | 0,116395149 | 0,87  | 0,56551441  | 0,5   | 0,785640104 |
| Zbtb9   | 0,39  | 0,46691413  | -0,17 | 0,803629137 | -0,12 | 0,881918514 | -0,4  | 0,327985937 | -0,17 | 0,789505562 |
| Zc2hc1a | 0,4   | 0,327798253 | 0,48  | 0,508267988 | 0     | 0,999931921 | -0,31 | 0,576295027 | 0,58  | 0,261508216 |
| Zc2hc1b | -0,01 | 0,984040323 | 0,04  | 0,958856577 | 0,09  | 0,9122363   | -0,1  | 0,845785501 | -0,11 | 0,884247878 |
| Zc2hc1c | 0,12  | 0,867243066 | 0,03  | 0,981853964 | 0,1   | 0,890842571 | -0,24 | 0,588844463 | 0,18  | 0,807725933 |
| Zc3h10  | -0,03 | 0,965991176 | 0,38  | 0,641804702 | 0,32  | 0,418083387 | -0,66 | 0,335755837 | -0,15 | 0,868167014 |
| Zc3h12a | 0,26  | 0,69184055  | 0,51  | 0,679900421 | 0,17  | 0,859917869 | -0,47 | 0,555470395 | 0,1   | 0,917075631 |
| Zc3h12b | 0,16  | 0,922591969 | -0,13 | 0,956559486 | 0     | 0,999931921 | -0,5  | 0,805169421 | -0,31 | 0,884247878 |
| Zc3h12c | 0,25  | 0,652260778 | 0,19  | 0,667757755 | -0,43 | 0,613496662 | 1,32  | 0,080602785 | -0,05 | 0,97683359  |
| Zc3h12d | -0,05 | 0,966775766 | 0,76  | 0,278753499 | 0,42  | 0,543696688 | -0,96 | 0,157857546 | -0,19 | 0,854494093 |
| Zc3h13  | 0,15  | 0,839273617 | -0,62 | 0,280779553 | -0,01 | 0,993379272 | 0,08  | 0,921036173 | -0,37 | 0,685316571 |
| Zc3h14  | -0,17 | 0,740529913 | -0,18 | 0,677208272 | 0,39  | 0,711793051 | -0,04 | 0,950913753 | -0,01 | 0,989179767 |
| Zc3h15  | 0,25  | 0,652774205 | 0,29  | 0,604677094 | 0,05  | 0,947890113 | 0,83  | 0,197646348 | 0,47  | 0,567590783 |
| Zc3h18  | -0,19 | 0,721378796 | -0,23 | 0,702154437 | 0,29  | 0,599127793 | -0,18 | 0,6887428   | -0,36 | 0,464042598 |
| Zc3h3   | -0,4  | 0,359025965 | -0,36 | 0,738810128 | -0,01 | 0,991456043 | 0,05  | 0,963665251 | -0,11 | 0,895613466 |
| Zc3h4   | -0,38 | 0,423395139 | -0,25 | 0,682851626 | -0,13 | 0,822609079 | -0,21 | 0,606342076 | -0,23 | 0,725669526 |
| Zc3h6   | 0,29  | 0,717407143 | -0,5  | 0,463954617 | 1,01  | 0,243742561 | -0,1  | 0,897599603 | 0,64  | 0,446990293 |
| Zc3h7a  | 0,82  | 0,182425433 | 0,61  | 0,394656972 | -0,52 | 0,321560439 | 0,43  | 0,499564387 | 0,57  | 0,487064794 |

|          |       |             |       |             |       |             |       |             |       |             |
|----------|-------|-------------|-------|-------------|-------|-------------|-------|-------------|-------|-------------|
| Zc3h7b   | -0,51 | 0,239601221 | -0,25 | 0,518494408 | 0,21  | 0,777568498 | 0,06  | 0,94976969  | -0,41 | 0,653769438 |
| Zc3h8    | -0,27 | 0,754029145 | 0,08  | 0,92856048  | -0,45 | 0,575442169 | -0,09 | 0,81848916  | 0,51  | 0,51513254  |
| Zc3hav1  | 0,23  | 0,679648318 | 0,49  | 0,208373622 | -0,01 | 0,997220401 | -0,11 | 0,78925905  | 0,68  | 0,177156585 |
| Zc3hav11 | -0,36 | 0,673314315 | 0,03  | 0,955302758 | 0,24  | 0,816710945 | 0,38  | 0,353716436 | 0,46  | 0,457522975 |
| Zc3hc1   | -0,38 | 0,456582405 | -0,01 | 0,994486533 | 1,22  | 0,056888083 | -0,03 | 0,971338071 | -0,38 | 0,4940585   |
| Zc4h2    | -0,47 | 0,552073244 | -0,06 | 0,94576641  | -0,06 | 0,967965018 | 0,08  | 0,933070045 | -0,99 | 0,271967431 |
| Zcchc10  | -0,7  | 0,599566593 | 0,18  | 0,79295936  | -0,17 | 0,849635871 | -0,04 | 0,973927614 | 0,37  | 0,823098095 |
| Zcchc11  | -0,26 | 0,656726345 | 0,16  | 0,88319997  | 0,76  | 0,486238146 | -0,38 | 0,594037577 | 0,35  | 0,65779331  |
| Zcchc12  | -0,25 | 0,618093813 | 0,43  | 0,641952023 | -0,18 | 0,925245169 | -0,74 | 0,22823617  | 0,13  | 0,921063662 |
| Zcchc13  | -0,14 | 0,829299665 | 0,04  | 0,954143906 | 0,01  | 0,992510518 | 0,2   | 0,581261175 | -0,03 | 0,973576804 |
| Zcchc14  | 0,04  | 0,956194544 | -0,54 | 0,230688117 | 0,11  | 0,877598693 | -0,05 | 0,932315462 | -0,3  | 0,607021246 |
| Zcchc16  | -0,42 | 0,443580998 | 0,17  | 0,867324954 | -0,11 | 0,915321116 | 0,28  | 0,556763864 | -0,35 | 0,525387388 |
| Zcchc17  | -0,21 | 0,717380591 | -0,47 | 0,244237144 | 0,35  | 0,558069445 | 0,19  | 0,680497621 | -0,39 | 0,628728585 |
| Zcchc18  | -0,14 | 0,886725624 | 0,15  | 0,89034555  | -0,03 | 0,969909716 | -0,11 | 0,794165367 | -0,35 | 0,537706015 |
| Zcchc2   | 0,63  | 0,247531815 | 0,28  | 0,77148563  | -0,38 | 0,704834115 | 0,5   | 0,388427913 | 0,87  | 0,087632866 |
| Zcchc24  | -0,41 | 0,422033372 | -0,28 | 0,536246395 | 0,04  | 0,972847253 | 0,15  | 0,764855242 | -0,01 | 0,994821569 |
| Zcchc3   | 0     | 0,999288019 | -0,29 | 0,550207979 | 0,18  | 0,871283127 | -0,2  | 0,715048779 | -0,17 | 0,840515079 |
| Zcchc4   | 0,34  | 0,634935991 | -0,32 | 0,48206644  | 0,22  | 0,882595833 | -0,2  | 0,606907787 | -0,9  | 0,151411882 |
| Zcchc5   | -0,11 | 0,89395175  | 0,11  | 0,891566803 | -0,54 | 0,174007047 | 0,03  | 0,949432584 | -0,15 | 0,852287138 |
| Zcchc6   | 0,39  | 0,397504196 | 0,46  | 0,290839749 | -0,46 | 0,453446323 | -0,37 | 0,279113894 | 0,42  | 0,37740661  |
| Zcchc7   | 0,09  | 0,928944712 | 0,05  | 0,976423495 | 0,33  | 0,644036028 | -0,27 | 0,664416283 | 0,07  | 0,943668392 |
| Zcchc8   | -0,33 | 0,755234272 | 0,09  | 0,919762719 | 0,2   | 0,852821279 | -0,36 | 0,315848249 | -0,17 | 0,799199452 |
| Zcchc9   | -0,45 | 0,652819827 | -0,23 | 0,766139392 | 0     | 0,998779926 | 0,85  | 0,076348362 | -0,15 | 0,85806566  |
| Zcrb1    | 0,01  | 0,982759333 | -0,21 | 0,818613446 | 0,22  | 0,796272987 | 0,38  | 0,596432013 | 0,23  | 0,795033998 |
| Zcwpw1   | -0,05 | 0,969746898 | -0,75 | 0,426168855 | 0,42  | 0,632531784 | 0,68  | 0,569104269 | -0,42 | 0,765419939 |
| Zcwpw2   | -0,14 | 0,915575695 | 0,29  | 0,826401928 | -0,45 | 0,506222058 | -0,89 | 0,105578151 | 0,21  | 0,830788023 |
| Zdbf2    | -0,06 | 0,927072151 | -0,16 | 0,708726036 | 0,13  | 0,866876618 | -0,16 | 0,65327421  | -0,07 | 0,953882756 |
| Zdhhc1   | -0,16 | 0,7494877   | -0,39 | 0,34168142  | 0,14  | 0,846975965 | -0,66 | 0,250595614 | -0,25 | 0,764656525 |
| Zdhhc11  | 0,11  | 0,923820085 | -0,3  | 0,757293036 | -0,02 | 0,990554477 | -0,07 | 0,93808802  | -0,36 | 0,702558142 |
| Zdhhc12  | 0,2   | 0,712165686 | -0,39 | 0,589448711 | 0,18  | 0,780601987 | 0,78  | 0,240941728 | 0,34  | 0,698858628 |
| Zdhhc13  | -0,37 | 0,498087659 | -0,38 | 0,716668427 | 0,32  | 0,806102885 | -0,23 | 0,81096279  | -0,42 | 0,584694999 |
| Zdhhc14  | -0,64 | 0,451062093 | -1,04 | 0,341083995 | -0,08 | 0,973802765 | -2,92 | 0,004876398 | -0,67 | 0,278240482 |
| Zdhhc15  | -2    | 0,053226128 | -0,85 | 0,586289005 | 1,16  | 0,379638471 | -0,88 | 0,152809511 | -1,16 | 0,253125485 |
| Zdhhc16  | -0,34 | 0,374444487 | -0,13 | 0,804492523 | 0,59  | 0,469558664 | 0,63  | 0,170803336 | -0,1  | 0,912683275 |
| Zdhhc17  | 0,08  | 0,911800803 | 0,68  | 0,20159159  | -0,99 | 0,085429661 | -0,78 | 0,19247613  | 0,24  | 0,779027509 |

|         |       |             |       |             |       |             |       |             |       |             |
|---------|-------|-------------|-------|-------------|-------|-------------|-------|-------------|-------|-------------|
| Zdhhc18 | -0,24 | 0,632053719 | -0,18 | 0,762909702 | 0,25  | 0,791940256 | -0,06 | 0,899737654 | -0,29 | 0,682929195 |
| Zdhhc19 | 0,03  | 0,971922167 | -0,69 | 0,655607331 | 0,23  | 0,789902399 | 0,16  | 0,814762053 | -0,52 | 0,465292641 |
| Zdhhc2  | 0,09  | 0,921306075 | 0,02  | 0,994137877 | 0,34  | 0,57717258  | 3,81  | 0,009399265 | -0,12 | 0,960974478 |
| Zdhhc20 | -0,24 | 0,660215768 | -0,2  | 0,655607331 | 0,33  | 0,650638751 | 1,16  | 0,128716159 | 0,49  | 0,55122001  |
| Zdhhc21 | -0,16 | 0,823108731 | 0,26  | 0,716769193 | 0,4   | 0,629611104 | 1     | 0,485770197 | 0,46  | 0,825680274 |
| Zdhhc22 | 0,18  | 0,690560567 | 0,39  | 0,455170487 | 0,17  | 0,838592669 | -0,23 | 0,572900056 | 0,08  | 0,915356549 |
| Zdhhc23 | 0,05  | 0,960720096 | 0,41  | 0,602549494 | 0,7   | 0,190867064 | -0,44 | 0,250724569 | -0,16 | 0,888662371 |
| Zdhhc24 | 0,08  | 0,926962211 | -0,37 | 0,810418074 | 0,09  | 0,940550094 | -0,41 | 0,715220925 | -0,66 | 0,595752354 |
| Zdhhc25 | -0,04 | 0,939858259 | 0     | 1           | 0,04  | 0,963221639 | 0,02  | 0,956598819 | -0,05 | 0,948163009 |
| Zdhhc3  | -0,72 | 0,550197991 | -0,71 | 0,398684036 | 0,52  | 0,348577918 | 0,48  | 0,288067607 | -0,33 | 0,493920965 |
| Zdhhc4  | -0,18 | 0,760264985 | -0,01 | 0,991061965 | 0,28  | 0,667675815 | -0,45 | 0,25823811  | 0,11  | 0,912594881 |
| Zdhhc5  | -0,43 | 0,270642335 | -0,09 | 0,882931058 | 0,31  | 0,681398968 | 0,49  | 0,168967728 | 0,09  | 0,905842374 |
| Zdhhc6  | -0,08 | 0,932324918 | -0,16 | 0,790939978 | 0,29  | 0,613380021 | 0,47  | 0,34969032  | 0,06  | 0,961406182 |
| Zdhhc7  | -0,17 | 0,928944712 | 0,15  | 0,907169389 | 0,4   | 0,840187016 | 0,15  | 0,795107733 | -0,61 | 0,32976535  |
| Zdhhc8  | -0,58 | 0,441176207 | -0,14 | 0,898238238 | 0,81  | 0,271482188 | 0,13  | 0,881829784 | 0,09  | 0,926008345 |
| Zdhhc9  | -0,4  | 0,445434312 | -0,52 | 0,217571257 | 0,63  | 0,41106377  | 0,8   | 0,107290551 | -0,17 | 0,824164005 |
| Zeb1    | -0,44 | 0,434641897 | -0,01 | 0,990052916 | -0,24 | 0,758005616 | 0,1   | 0,813792791 | -0,23 | 0,68987325  |
| Zeb2    | 0,17  | 0,878162057 | 0,71  | 0,392001643 | 0     | 0,999931921 | -1,72 | 0,040937914 | 0,35  | 0,728578071 |
| Zeb2os  | -0,22 | 0,764189777 | 0,14  | 0,83733456  | -0,04 | 0,963199274 | -0,92 | 0,37252791  | -0,32 | 0,794517953 |
| Zer1    | -0,02 | 0,976574175 | -0,08 | 0,927073711 | 0,37  | 0,541500129 | -0,71 | 0,083974472 | -0,52 | 0,375162254 |
| Zf12    | 0,21  | 0,721922161 | -0,32 | 0,599353083 | -0,36 | 0,727131283 | -0,28 | 0,576295027 | 0,08  | 0,948794329 |
| Zfand1  | -0,47 | 0,5261831   | -0,12 | 0,89081665  | -0,52 | 0,661747229 | -0,91 | 0,076348362 | -0,67 | 0,21468203  |
| Zfand2a | 0,36  | 0,438932987 | 0,17  | 0,852719676 | -0,31 | 0,548839869 | 0,04  | 0,961384516 | 0,17  | 0,774345211 |
| Zfand2b | -0,21 | 0,73787988  | -0,27 | 0,787503301 | -0,06 | 0,939807731 | 0,68  | 0,242380187 | 0,44  | 0,559845734 |
| Zfand3  | 0,03  | 0,967226721 | 0,13  | 0,882847123 | -0,01 | 0,990836784 | 0,17  | 0,767218704 | 0,04  | 0,969750339 |
| Zfand4  | -0,65 | 0,279889648 | 0,83  | 0,486712798 | 0,89  | 0,280780716 | 1,24  | 0,091266384 | 0,04  | 0,976743304 |
| Zfand5  | 0,22  | 0,585966685 | 0,06  | 0,89545828  | 0,06  | 0,931374368 | 0,29  | 0,5508774   | 0,05  | 0,954316248 |
| Zfand6  | 0,52  | 0,191492041 | 0,02  | 0,988550087 | 0,58  | 0,324705558 | 0,3   | 0,433215748 | 0,05  | 0,959398085 |
| Zfa-ps  | -0,14 | 0,850952988 | -0,12 | 0,845712013 | -0,02 | 0,981188621 | 0,15  | 0,817536845 | -0,03 | 0,978652131 |
| Zfat    | -0,07 | 0,940281494 | 0,1   | 0,879693148 | 0,44  | 0,508853757 | 0,03  | 0,967866794 | -0,52 | 0,415767777 |
| Zfc3h1  | 0,23  | 0,757499328 | -0,05 | 0,949168867 | 0,34  | 0,62535327  | 0,4   | 0,567550832 | 0,01  | 0,990091016 |
| Zfhx2   | -0,08 | 0,902520824 | -0,18 | 0,747707816 | -0,1  | 0,9346616   | -0,3  | 0,641893855 | -0,08 | 0,951429597 |
| Zfhx2os | 0,01  | 0,984183188 | 0,2   | 0,791519472 | -0,14 | 0,802795561 | -0,29 | 0,48505774  | -0,01 | 0,990633766 |
| Zfhx3   | -0,18 | 0,776721795 | 0,02  | 0,99074556  | 0,72  | 0,240511385 | -2,1  | 0,005240816 | -0,64 | 0,20482955  |
| Zfhx4   | 0,31  | 0,72337861  | 0,26  | 0,612645853 | 0,54  | 0,622946887 | -0,02 | 0,979932562 | 0,37  | 0,719430166 |

|           |       |             |       |             |       |             |       |             |       |             |
|-----------|-------|-------------|-------|-------------|-------|-------------|-------|-------------|-------|-------------|
| Zfos1     | 0,76  | 0,091179957 | 0,72  | 0,145709196 | -0,74 | 0,096957153 | 0,32  | 0,378102359 | 0,8   | 0,121021611 |
| Zfp1      | 0,35  | 0,586458491 | 0,45  | 0,558135871 | -0,27 | 0,68845998  | -0,11 | 0,898801714 | 0,55  | 0,493673209 |
| Zfp101    | 0,27  | 0,722415783 | 0,09  | 0,873628464 | 0,28  | 0,654377421 | -0,03 | 0,944558253 | -0,03 | 0,975441362 |
| Zfp105    | -0,03 | 0,976855185 | -0,38 | 0,580456226 | -0,19 | 0,825782434 | -1,34 | 0,022696538 | -0,27 | 0,683361017 |
| Zfp106    | -0,07 | 0,930710746 | -0,12 | 0,785459083 | -0,08 | 0,940489823 | 0,17  | 0,653513975 | -0,22 | 0,711387654 |
| Zfp108    | -0,17 | 0,793172703 | 0,32  | 0,812664394 | -0,58 | 0,485917439 | -1,05 | 0,258695369 | -0,67 | 0,354557431 |
| Zfp109    | 0,2   | 0,738483516 | -0,25 | 0,804868131 | 0,1   | 0,882540073 | -0,24 | 0,65865291  | -0,21 | 0,823098095 |
| Zfp11     | -0,35 | 0,841140165 | 0,76  | 0,769023033 | 0,57  | 0,633044706 | -2,25 | 0,253124162 | -0,39 | 0,832289552 |
| Zfp110    | 0,15  | 0,898269435 | -0,23 | 0,756267547 | 0,44  | 0,687245138 | -0,09 | 0,921545436 | 0,16  | 0,874716101 |
| Zfp111    | -0,01 | 0,984202289 | -0,05 | 0,9563413   | 0,66  | 0,560847022 | -0,27 | 0,766455981 | -0,61 | 0,697818445 |
| Zfp112    | -0,39 | 0,427151602 | -0,06 | 0,946885634 | -0,29 | 0,698662367 | -0,19 | 0,709465672 | -0,1  | 0,884640084 |
| Zfp113    | -0,06 | 0,963378584 | -0,43 | 0,656768093 | -0,55 | 0,715497532 | -1,38 | 0,167766415 | -1    | 0,097807949 |
| Zfp114    | 0,11  | 0,926181408 | 0,48  | 0,459417799 | -0,52 | 0,709317317 | -0,06 | 0,960547981 | 0,25  | 0,84970727  |
| Zfp119a   | -0,28 | 0,820023436 | -0,47 | 0,815317911 | -0,21 | 0,944441051 | 0     | 1           | -0,27 | 0,799087329 |
| Zfp119b   | 0,43  | 0,490731724 | -0,55 | 0,707455401 | 0,49  | 0,548288344 | -0,13 | 0,955220155 | 0,36  | 0,860591136 |
| Zfp12     | 0,01  | 0,996219097 | 0,04  | 0,982877166 | -0,41 | 0,629611104 | -0,29 | 0,709632549 | -0,32 | 0,702402249 |
| Zfp120    | -0,38 | 0,689966234 | -0,3  | 0,867265251 | 0,09  | 0,946571863 | -0,81 | 0,676010477 | -1,1  | 0,450543672 |
| Zfp125    | -0,01 | 0,997645768 | 0,06  | 0,956998711 | -0,07 | 0,944441051 | 0,95  | 0,171773102 | -0,42 | 0,714399075 |
| Zfp128    | -0,91 | 0,251832189 | -0,26 | 0,900801202 | -0,38 | 0,543291636 | -0,27 | 0,737646112 | 0,15  | 0,940092696 |
| Zfp13     | 0,11  | 0,89763852  | 0,02  | 0,996560611 | 0,04  | 0,967754737 | -0,48 | 0,591204599 | -0,21 | 0,844324205 |
| Zfp131    | 0,58  | 0,156158686 | 0,35  | 0,667502888 | -0,13 | 0,877023506 | 0,04  | 0,947387294 | 0,45  | 0,342250812 |
| Zfp133-ps | -0,04 | 0,976870178 | -0,14 | 0,947107147 | -0,1  | 0,935451631 | -0,25 | 0,733903742 | -0,37 | 0,779920985 |
| Zfp14     | 0,06  | 0,966775766 | 0,34  | 0,377669413 | -0,17 | 0,841464759 | -0,7  | 0,122194306 | -0,51 | 0,262189892 |
| Zfp141    | 0,02  | 0,996219097 | 0,77  | 0,48761393  | 0,13  | 0,960345802 | -0,38 | 0,734497576 | -0,07 | 0,969617491 |
| Zfp142    | 0,18  | 0,686076441 | 0,12  | 0,891749049 | 0,24  | 0,70635953  | -0,82 | 0,046894705 | -0,01 | 0,989183416 |
| Zfp143    | 0,17  | 0,766662919 | 0,29  | 0,672416139 | 0,47  | 0,477258573 | -0,22 | 0,868473157 | 0,52  | 0,60563194  |
| Zfp146    | -0,49 | 0,434641897 | -0,32 | 0,441593532 | -0,12 | 0,935978536 | 0,13  | 0,81156973  | -0,21 | 0,749887358 |
| Zfp148    | -0,02 | 0,984096321 | 0,23  | 0,557875295 | 0,15  | 0,877023506 | -0,11 | 0,923775458 | -0,09 | 0,950267521 |
| Zfp157    | -0,68 | 0,26056536  | -0,54 | 0,6588839   | 0,36  | 0,876005604 | 0,26  | 0,75555626  | 0,09  | 0,943296691 |
| Zfp160    | -0,03 | 0,969016153 | 0,22  | 0,901000778 | -0,17 | 0,783006    | -0,24 | 0,769711676 | 0,5   | 0,338653241 |
| Zfp169    | -0,13 | 0,87915779  | 0,01  | 0,99804971  | -0,35 | 0,740600774 | -0,54 | 0,544706569 | -0,29 | 0,786745037 |
| Zfp174    | 0,16  | 0,827116244 | 0,13  | 0,786394409 | -0,03 | 0,970939073 | -0,03 | 0,970931237 | -0,4  | 0,612054078 |
| Zfp180    | -0,25 | 0,731173847 | 0,19  | 0,882589938 | 0     | 0,998290268 | 0,16  | 0,884495394 | 0,53  | 0,587440076 |
| Zfp182    | -0,76 | 0,390295548 | -0,08 | 0,956145324 | 0,04  | 0,983471086 | -0,53 | 0,414522125 | -0,46 | 0,402633074 |
| Zfp184    | 0,31  | 0,535111205 | -0,1  | 0,832968521 | 0     | 0,999931921 | -0,34 | 0,700123926 | -0,33 | 0,761591521 |

|          |       |             |       |             |       |             |       |             |       |             |
|----------|-------|-------------|-------|-------------|-------|-------------|-------|-------------|-------|-------------|
| Zfp185   | 0,27  | 0,663760226 | -0,11 | 0,882589938 | 0,11  | 0,932706021 | -0,16 | 0,823045201 | -0,25 | 0,836061657 |
| Zfp189   | 0,12  | 0,789588113 | -0,6  | 0,561562373 | -0,33 | 0,831139996 | -0,12 | 0,9159536   | -0,27 | 0,843351909 |
| Zfp2     | -0,42 | 0,664036618 | 1     | 0,116326024 | 0,2   | 0,791083767 | -0,69 | 0,207373361 | 0,19  | 0,853225105 |
| Zfp202   | -0,14 | 0,871963866 | -0,04 | 0,967833514 | 0,06  | 0,967930981 | 0,68  | 0,406029112 | 0,66  | 0,502234944 |
| Zfp207   | 0,13  | 0,754298754 | 0,33  | 0,458336745 | 0,37  | 0,501664412 | 0,14  | 0,73719503  | 0,25  | 0,652746284 |
| Zfp212   | 0,27  | 0,587552401 | -0,17 | 0,819120994 | -0,62 | 0,37686469  | 0,35  | 0,715821479 | 0,42  | 0,637294627 |
| Zfp213   | 0,22  | 0,833382917 | -0,15 | 0,779562915 | 0,1   | 0,894229514 | -0,2  | 0,637969052 | 0,16  | 0,805072752 |
| Zfp217   | -0,14 | 0,893137556 | 0,24  | 0,65041955  | -0,08 | 0,963221639 | 0,8   | 0,126859944 | 0,32  | 0,713710128 |
| Zfp219   | 0,61  | 0,16297454  | 0,34  | 0,51825831  | -0,23 | 0,805383348 | -0,57 | 0,149186672 | -0,1  | 0,930287169 |
| Zfp229   | -0,09 | 0,90742841  | 0,32  | 0,828524523 | 0,27  | 0,84235099  | -0,44 | 0,763751448 | -0,51 | 0,751494143 |
| Zfp235   | -0,55 | 0,363930021 | -0,04 | 0,978904487 | 0,29  | 0,673807963 | -0,19 | 0,772462401 | -0,19 | 0,793839436 |
| Zfp236   | -0,02 | 0,982703709 | -0,05 | 0,919602924 | 0,04  | 0,955984004 | -0,14 | 0,718323562 | -0,16 | 0,784872568 |
| Zfp239   | 0,72  | 0,430173798 | -0,44 | 0,470165933 | 0,17  | 0,802635544 | 0,09  | 0,81096279  | 0,05  | 0,953297732 |
| Zfp24    | -0,32 | 0,589079174 | 0,2   | 0,740618526 | 0,45  | 0,590228748 | 0,08  | 0,920055701 | -0,1  | 0,948163009 |
| Zfp248   | -0,41 | 0,653379837 | -0,64 | 0,703010486 | 0,1   | 0,95106142  | -0,01 | 1           | -0,76 | 0,587305934 |
| Zfp251   | -0,2  | 0,760660571 | -0,58 | 0,49125334  | 0,21  | 0,791940256 | -0,49 | 0,324727263 | -0,57 | 0,20389911  |
| Zfp26    | -0,64 | 0,328303644 | -0,68 | 0,658998976 | -0,24 | 0,885680687 | 0,12  | 0,93355189  | -0,4  | 0,605912145 |
| Zfp260   | 0,48  | 0,495249753 | -0,16 | 0,868839934 | -0,12 | 0,946777487 | -0,07 | 0,895705411 | 0,48  | 0,389664866 |
| Zfp263   | 0,59  | 0,561405935 | -0,4  | 0,638366221 | 0,4   | 0,702928613 | 0,26  | 0,634935038 | -0,25 | 0,775465662 |
| Zfp266   | -0,43 | 0,619127292 | -0,15 | 0,824428761 | -0,29 | 0,791601562 | 0,58  | 0,644720709 | 0,02  | 0,990633766 |
| Zfp27    | -0,44 | 0,491813856 | -0,22 | 0,781665479 | 0,24  | 0,850171327 | -1,32 | 0,116267286 | -0,74 | 0,499998316 |
| Zfp273   | -0,48 | 0,699989503 | -0,22 | 0,932965109 | 0,4   | 0,548288344 | -0,74 | 0,636971316 | -0,54 | 0,778000995 |
| Zfp275   | -0,23 | 0,597519827 | -0,26 | 0,817367084 | 0,03  | 0,977827235 | 0,17  | 0,675160655 | -0,27 | 0,708051749 |
| Zfp276   | -0,47 | 0,369418071 | -0,03 | 0,983396644 | 0,16  | 0,872313115 | -0,5  | 0,369466071 | -0,2  | 0,808378459 |
| Zfp277   | 0,1   | 0,901141323 | 0,36  | 0,48206644  | 0,16  | 0,864364089 | 0,01  | 0,981057922 | 0,08  | 0,91461345  |
| Zfp28    | 0,14  | 0,892203477 | -0,2  | 0,805949528 | 0,51  | 0,552542989 | 0,67  | 0,517178455 | 0,65  | 0,638780444 |
| Zfp280b  | -0,05 | 0,939752703 | -0,33 | 0,688435265 | -0,01 | 0,997268369 | -0,18 | 0,85301747  | -0,87 | 0,290772983 |
| Zfp280c  | -0,22 | 0,82298173  | -0,17 | 0,851083531 | 1,07  | 0,348577918 | 0,61  | 0,346300638 | 0,06  | 0,962665265 |
| Zfp280d  | -0,03 | 0,964154899 | 0,04  | 0,977697653 | -0,75 | 0,230173776 | -0,39 | 0,485555968 | 0,28  | 0,700875396 |
| Zfp281   | 0,33  | 0,398157125 | 0,41  | 0,290322318 | -0,32 | 0,483761569 | 0,1   | 0,813667931 | 1,01  | 0,037726966 |
| Zfp282   | -0,94 | 0,164698985 | 0,42  | 0,732847182 | 0,09  | 0,933597343 | -0,29 | 0,743093921 | -0,35 | 0,644533534 |
| Zfp286   | 0,2   | 0,747541552 | 0,07  | 0,926810709 | -0,02 | 0,984119559 | -0,12 | 0,825022928 | -0,09 | 0,928014634 |
| Zfp286it | -0,05 | 0,925510521 | -0,01 | 0,994137877 | -0,21 | 0,73501607  | 0,14  | 0,717489777 | 0,18  | 0,767310323 |
| Zfp287   | -0,38 | 0,520667704 | 0,39  | 0,643631572 | -0,32 | 0,478553804 | -0,34 | 0,398222471 | 0,99  | 0,064929499 |
| Zfp292   | -0,65 | 0,476494431 | 1     | 0,424068004 | 0,14  | 0,835677021 | -0,07 | 0,957596559 | 0,52  | 0,493920965 |



|           |       |             |       |             |       |             |       |             |       |             |
|-----------|-------|-------------|-------|-------------|-------|-------------|-------|-------------|-------|-------------|
| Zfp296    | 0,05  | 0,941878618 | 0,62  | 0,418279074 | -0,1  | 0,929871006 | -0,35 | 0,648169038 | 0,23  | 0,742080065 |
| Zfp3      | -0,13 | 0,841584453 | 0,01  | 0,986742203 | -0,19 | 0,807391473 | -0,22 | 0,53999606  | -0,44 | 0,464623963 |
| Zfp30     | -0,28 | 0,579630863 | 0,17  | 0,774278866 | -0,23 | 0,706842882 | -0,33 | 0,426759693 | -0,1  | 0,922424838 |
| Zfp300    | -0,54 | 0,308681872 | -0,16 | 0,882847123 | 0,03  | 0,979585868 | -2,15 | 0,162840413 | -0,24 | 0,935812103 |
| Zfp316    | 0,17  | 0,744309999 | 0,17  | 0,751116121 | -0,29 | 0,610141978 | -0,04 | 0,948515439 | -0,04 | 0,953989345 |
| Zfp317    | 0,37  | 0,815489016 | -0,25 | 0,847821325 | 0,3   | 0,696047476 | -0,93 | 0,137867451 | -0,36 | 0,676132909 |
| Zfp318    | -0,36 | 0,74140155  | -0,31 | 0,693906911 | 0,59  | 0,607318275 | -0,31 | 0,700431952 | -0,01 | 0,991437885 |
| Zfp319    | 0,07  | 0,892823025 | 0,22  | 0,731098047 | -0,34 | 0,533114844 | -0,13 | 0,73574774  | -0,03 | 0,970154126 |
| Zfp322a   | -0,55 | 0,207906161 | 0,64  | 0,680709276 | 0,29  | 0,789396261 | -0,92 | 0,06824225  | 0,2   | 0,77360786  |
| Zfp324    | 0,06  | 0,976574175 | 0,11  | 0,946599376 | -0,33 | 0,71018068  | -0,2  | 0,861164772 | 0,51  | 0,635994476 |
| Zfp326    | 0,02  | 0,985522311 | 0,17  | 0,907552582 | -0,41 | 0,698662367 | -0,21 | 0,899869278 | 0,2   | 0,899196564 |
| Zfp329    | 0,37  | 0,36624708  | 0,09  | 0,947107147 | -0,42 | 0,469558664 | -1,21 | 0,120568928 | -0,66 | 0,322976948 |
| Zfp330    | 0,52  | 0,287459734 | 0,17  | 0,737385437 | -0,01 | 0,993379272 | 0,44  | 0,174375684 | -0,01 | 0,989369298 |
| Zfp334    | -0,55 | 0,486012121 | 0,06  | 0,945980281 | 0,14  | 0,931254862 | -0,32 | 0,316697742 | -0,63 | 0,319952112 |
| Zfp335    | 0,24  | 0,621037557 | -0,03 | 0,977618172 | 0,44  | 0,54913284  | 0,17  | 0,728293649 | -0,24 | 0,650235387 |
| Zfp335os  | 0,07  | 0,874688734 | -0,01 | 0,990088847 | -0,33 | 0,560191012 | 0,22  | 0,621957002 | -0,43 | 0,409720233 |
| Zfp341    | -0,35 | 0,494884125 | -0,09 | 0,855632384 | -0,07 | 0,93278571  | -0,1  | 0,841251202 | -0,36 | 0,509461732 |
| Zfp345    | -0,07 | 0,902084882 | -0,2  | 0,602956592 | 0,49  | 0,340707231 | 0,19  | 0,732130462 | 0,15  | 0,872943048 |
| Zfp346    | -0,07 | 0,94881239  | -0,27 | 0,642538803 | -0,51 | 0,62535327  | -0,2  | 0,827259542 | 0,04  | 0,978604922 |
| Zfp35     | 0,19  | 0,944291635 | 0,04  | 0,994137877 | 0,49  | 0,662451176 | 0,16  | 0,879546426 | 0,06  | 0,967325392 |
| Zfp353-ps | -0,35 | 0,656726345 | 0,28  | 0,703291096 | -0,03 | 0,974887915 | -0,79 | 0,197646348 | 0,03  | 0,969617491 |
| Zfp354a   | 0,21  | 0,833275012 | 0,1   | 0,936273494 | -0,03 | 0,975982548 | 0,14  | 0,914684276 | -0,16 | 0,879316255 |
| Zfp354b   | 0,28  | 0,750634506 | 0,42  | 0,747707816 | -0,31 | 0,605049228 | -0,6  | 0,401585047 | -0,26 | 0,835191    |
| Zfp354c   | 0,01  | 0,992748202 | -0,03 | 0,989873399 | -0,28 | 0,79284622  | -0,69 | 0,564749161 | 0,19  | 0,932268703 |
| Zfp358    | -0,61 | 0,148685247 | -0,27 | 0,642775877 | -0,12 | 0,850171327 | -0,38 | 0,36184569  | -0,13 | 0,846306738 |
| Zfp36     | -0,17 | 0,702313432 | 0,57  | 0,17827498  | -0,47 | 0,339430209 | -0,92 | 0,085964255 | -0,17 | 0,823776279 |
| Zfp362    | -0,46 | 0,535873415 | -0,14 | 0,954307545 | -0,16 | 0,841053092 | -0,65 | 0,141743063 | -0,58 | 0,201193058 |
| Zfp365    | 0,07  | 0,946368282 | 0,21  | 0,843162191 | -0,36 | 0,572424778 | -0,32 | 0,52218381  | -0,6  | 0,308256382 |
| Zfp366    | -0,37 | 0,810208393 | 0     | 0,999395995 | -1,21 | 0,209534486 | -0,18 | 0,876895238 | 0,34  | 0,772971095 |
| Zfp367    | -1,02 | 0,176046708 | -1,46 | 0,154882285 | 0,24  | 0,744122364 | -0,74 | 0,152893731 | -0,68 | 0,212051906 |
| Zfp369    | 0,09  | 0,943079514 | -0,56 | 0,454826113 | 0,41  | 0,78162625  | 0,25  | 0,641962463 | -0,2  | 0,77360786  |
| Zfp361l1  | -0,18 | 0,81131326  | -0,01 | 0,994137877 | 0,08  | 0,909963525 | -0,26 | 0,415342328 | -0,01 | 0,984724142 |
| Zfp361l2  | -0,17 | 0,810208393 | 0,02  | 0,989873399 | 0,47  | 0,601125209 | 0,1   | 0,900618083 | -0,27 | 0,728388857 |
| Zfp361l3  | 0,15  | 0,885955034 | 0,01  | 0,989543827 | -0,23 | 0,713620433 | -0,04 | 0,950082402 | 0,07  | 0,929780699 |
| Zfp37     | -0,03 | 0,984759626 | -0,6  | 0,527287574 | -0,08 | 0,924467592 | -0,87 | 0,152307397 | -0,72 | 0,469148703 |

|         |       |             |       |             |       |             |       |             |       |             |
|---------|-------|-------------|-------|-------------|-------|-------------|-------|-------------|-------|-------------|
| Zfp382  | -0,55 | 0,472993837 | -0,28 | 0,542255924 | -0,14 | 0,908400411 | 0,78  | 0,064119729 | 0,72  | 0,198575493 |
| Zfp383  | 0,24  | 0,764824121 | -0,61 | 0,246996894 | -0,41 | 0,575442169 | 0,8   | 0,529965498 | -0,11 | 0,952718905 |
| Zfp384  | 0,1   | 0,854988906 | 0,09  | 0,918294209 | -0,36 | 0,60220411  | -0,06 | 0,908141892 | -0,17 | 0,772515111 |
| Zfp385a | 0,25  | 0,767797797 | 0,21  | 0,882589938 | 0,58  | 0,489556221 | 0,25  | 0,689441036 | -0,31 | 0,765327693 |
| Zfp385b | -0,28 | 0,565789735 | 0,08  | 0,956998711 | -0,11 | 0,937096585 | -0,1  | 0,838270726 | -0,18 | 0,885318142 |
| Zfp385c | -0,12 | 0,846313357 | -0,34 | 0,579543516 | -0,13 | 0,87140695  | 0,02  | 0,975040952 | -0,38 | 0,616797608 |
| Zfp386  | 0,2   | 0,887555241 | -0,3  | 0,847821325 | -0,02 | 0,99416325  | -0,26 | 0,642212952 | -0,38 | 0,699671375 |
| Zfp389  | -0,71 | 0,164598631 | -0,23 | 0,78836254  | -0,1  | 0,901823472 | 0,24  | 0,763366023 | -0,26 | 0,710368081 |
| Zfp39   | -0,58 | 0,555287219 | -0,15 | 0,907186434 | 0,04  | 0,967965018 | -1,08 | 0,241372443 | 0,47  | 0,586118577 |
| Zfp395  | 0,21  | 0,80548452  | -0,13 | 0,943782735 | 0,09  | 0,938795886 | -0,37 | 0,715804103 | -0,71 | 0,312830548 |
| Zfp397  | -0,22 | 0,795544692 | -0,16 | 0,877770697 | 0,49  | 0,685933617 | -1,5  | 0,040803179 | -0,21 | 0,765809384 |
| Zfp398  | -0,28 | 0,785012364 | -0,11 | 0,919762719 | 0,11  | 0,967540576 | -1,11 | 0,079938142 | -0,32 | 0,827532593 |
| Zfp40   | -0,18 | 0,858181818 | 0,06  | 0,98336499  | 0,1   | 0,956570063 | -0,97 | 0,552562986 | -0,57 | 0,722348247 |
| Zfp407  | -0,07 | 0,907391935 | -0,08 | 0,956049982 | 0,01  | 0,997581017 | -0,31 | 0,647512496 | -0,34 | 0,534550896 |
| Zfp408  | -0,19 | 0,820785667 | 0,28  | 0,703041962 | 0,5   | 0,630805418 | -0,36 | 0,369310497 | -0,16 | 0,875682429 |
| Zfp41   | 0     | 0,997205466 | -0,07 | 0,945143056 | -0,17 | 0,868054401 | 0,7   | 0,337036364 | -0,36 | 0,661367728 |
| Zfp410  | -0,35 | 0,50199908  | -0,08 | 0,946885634 | 0,57  | 0,379638471 | 0,29  | 0,586887461 | -0,06 | 0,942854766 |
| Zfp414  | -0,32 | 0,437152348 | -0,17 | 0,708168221 | -0,15 | 0,791955135 | -0,05 | 0,922740736 | -0,01 | 0,991980521 |
| Zfp418  | -0,53 | 0,704646948 | 0,2   | 0,898952381 | 0,07  | 0,956894731 | -1,38 | 0,228083123 | -0,1  | 0,965776227 |
| Zfp42   | 0,49  | 0,488681054 | 0,52  | 0,488690234 | -0,43 | 0,397324055 | -0,32 | 0,298756888 | 0,58  | 0,308256382 |
| Zfp420  | -0,23 | 0,722763958 | -0,16 | 0,84786877  | -0,16 | 0,838280035 | -0,26 | 0,874904932 | 1,1   | 0,433531721 |
| Zfp422  | -0,12 | 0,847749486 | 0,04  | 0,961370411 | -0,39 | 0,50296943  | -0,12 | 0,918492221 | 0,25  | 0,843975299 |
| Zfp423  | -0,34 | 0,364243885 | -0,12 | 0,859816636 | -0,52 | 0,307649242 | 0,43  | 0,200972441 | -0,14 | 0,830575776 |
| Zfp426  | -0,05 | 0,967226721 | 0,24  | 0,909975293 | -0,56 | 0,675320774 | -0,69 | 0,45976466  | 0,07  | 0,968047896 |
| Zfp428  | 0,1   | 0,84988108  | -0,18 | 0,924138252 | 0,35  | 0,660357394 | -0,01 | 0,992365775 | -0,32 | 0,601753447 |
| Zfp429  | 0,57  | 0,322835282 | 0,61  | 0,230688117 | 0     | 0,997268369 | -0,03 | 0,972126574 | 0,75  | 0,239898845 |
| Zfp433  | 0,21  | 0,846868468 | -0,17 | 0,729957667 | -0,19 | 0,852052683 | 0,2   | 0,87148686  | 0,08  | 0,979173761 |
| Zfp438  | 0,15  | 0,868134822 | 0,03  | 0,983363427 | -0,45 | 0,547279853 | 0,3   | 0,639097424 | 0,68  | 0,367892599 |
| Zfp444  | -0,47 | 0,460231397 | 0,32  | 0,619807116 | -0,28 | 0,688643408 | -0,32 | 0,477503193 | -0,18 | 0,833124162 |
| Zfp445  | -0,08 | 0,895359408 | 0,42  | 0,568187167 | -0,7  | 0,364663958 | 0,15  | 0,847194434 | 0,46  | 0,535113522 |
| Zfp446  | -0,27 | 0,662416763 | 0,68  | 0,143113166 | -0,07 | 0,934813979 | -0,22 | 0,531468445 | 0,23  | 0,673120647 |
| Zfp449  | 0,28  | 0,780084058 | 0,03  | 0,994944319 | -0,1  | 0,933055892 | -0,15 | 0,951235707 | 0,28  | 0,885777129 |
| Zfp451  | 0,11  | 0,871094329 | -0,47 | 0,230688117 | 0,35  | 0,571681705 | -0,05 | 0,952627777 | -0,19 | 0,845453161 |
| Zfp454  | 0,07  | 0,963378584 | 0,1   | 0,955475499 | 0,16  | 0,904573436 | -0,82 | 0,433215748 | -0,62 | 0,327246128 |
| Zfp455  | 0,25  | 0,730385117 | 0,28  | 0,832246845 | -0,46 | 0,569943085 | -0,26 | 0,848335311 | 1,21  | 0,383190821 |

|         |       |             |       |             |       |             |       |             |       |             |
|---------|-------|-------------|-------|-------------|-------|-------------|-------|-------------|-------|-------------|
| Zfp456  | -0,11 | 0,922988869 | 0,14  | 0,931100468 | 0,02  | 0,989513871 | -0,19 | 0,848930763 | 0,16  | 0,909550161 |
| Zfp457  | 0,19  | 0,685835074 | -0,02 | 0,968851247 | -0,07 | 0,912539816 | -0,06 | 0,954787299 | -0,09 | 0,946185373 |
| Zfp458  | 0,01  | 0,997205466 | -0,96 | 0,723842223 | -0,92 | 0,628978443 | 0,08  | 0,971338071 | 0,51  | 0,742614391 |
| Zfp459  | 0,07  | 0,919567534 | 0,36  | 0,648582774 | -0,26 | 0,612317172 | -0,29 | 0,626690659 | 0,45  | 0,437452807 |
| Zfp46   | -0,8  | 0,178589155 | -0,14 | 0,771641267 | 0,42  | 0,631323805 | 0,76  | 0,154588425 | -0,57 | 0,470021545 |
| Zfp462  | -0,45 | 0,474293292 | -0,39 | 0,434035118 | 0,88  | 0,218714399 | -0,92 | 0,189349008 | -0,82 | 0,272406804 |
| Zfp467  | -0,06 | 0,91366065  | -0,42 | 0,432587683 | -0,32 | 0,490845508 | -0,24 | 0,444137162 | -0,01 | 0,991418175 |
| Zfp472  | -0,32 | 0,606922012 | -0,35 | 0,807175471 | 0,69  | 0,414922527 | 0,63  | 0,183937868 | 0,95  | 0,104257693 |
| Zfp473  | 0,38  | 0,607051612 | 0,07  | 0,945622616 | -0,14 | 0,823823322 | -0,07 | 0,926085733 | 0,01  | 0,993903627 |
| Zfp474  | 0,11  | 0,829299665 | 0,03  | 0,971464245 | -0,23 | 0,654076196 | -0,03 | 0,94180692  | 0,02  | 0,980306863 |
| Zfp488  | -0,27 | 0,508688727 | -0,74 | 0,490905542 | 0,02  | 0,982305856 | 0,03  | 0,969124536 | 0,36  | 0,74106181  |
| Zfp493  | -0,57 | 0,552331623 | 0,18  | 0,839789639 | -0,06 | 0,959862254 | -0,61 | 0,091324653 | -0,12 | 0,916458035 |
| Zfp503  | -0,17 | 0,733583213 | -0,23 | 0,612878948 | -0,03 | 0,982664533 | -0,93 | 0,077102845 | -0,11 | 0,912594881 |
| Zfp507  | 0,12  | 0,882060783 | -0,19 | 0,894022563 | 0,31  | 0,619311437 | 0,12  | 0,87812231  | -0,08 | 0,954565959 |
| Zfp51   | -0,19 | 0,911800803 | 0,12  | 0,955248177 | -0,38 | 0,82104737  | -1,85 | 0,066524162 | -0,78 | 0,481784958 |
| Zfp511  | -0,06 | 0,929651784 | 0,07  | 0,930192503 | 0,05  | 0,95106142  | -0,02 | 0,971151107 | 0,04  | 0,95985938  |
| Zfp512  | -0,31 | 0,701789703 | 0,36  | 0,571026746 | 0,36  | 0,687245138 | -0,66 | 0,355784039 | -0,51 | 0,592053999 |
| Zfp512b | -0,83 | 0,160714051 | 0,13  | 0,910193022 | 0,57  | 0,698170879 | -0,36 | 0,477226066 | 0     | 0,999303691 |
| Zfp513  | -0,37 | 0,593510013 | 0,17  | 0,854940418 | -0,11 | 0,926182797 | 0,08  | 0,832162054 | -0,38 | 0,431894609 |
| Zfp516  | 0,11  | 0,921306075 | 0,09  | 0,919934184 | 0,32  | 0,697622949 | 0,75  | 0,175733334 | 0,17  | 0,898309858 |
| Zfp518a | -0,98 | 0,171833254 | 0,09  | 0,934907409 | -0,05 | 0,984119559 | -0,88 | 0,560223278 | 0,68  | 0,68987325  |
| Zfp518b | -0,23 | 0,81266486  | -0,07 | 0,936693859 | 0,4   | 0,477461651 | 0,33  | 0,504653282 | -0,01 | 0,990633766 |
| Zfp52   | -0,64 | 0,419481733 | 0,01  | 0,997700959 | -0,25 | 0,753964513 | 1,97  | 0,109212663 | -0,37 | 0,846526184 |
| Zfp521  | -0,29 | 0,470455626 | -0,17 | 0,775155136 | -0,3  | 0,622546805 | 2,29  | 0,009182057 | 0,97  | 0,074022462 |
| Zfp523  | -0,28 | 0,644174496 | -0,27 | 0,651611182 | 1,01  | 0,092842349 | -0,29 | 0,506792594 | -0,77 | 0,134845548 |
| Zfp524  | 0,33  | 0,367416674 | 0,33  | 0,487477927 | -0,11 | 0,930193129 | -0,25 | 0,623393594 | 0,08  | 0,940485831 |
| Zfp526  | -0,56 | 0,305864243 | 0,06  | 0,952178482 | -0,13 | 0,899144679 | -0,32 | 0,646776742 | 0,21  | 0,807620467 |
| Zfp53   | -0,03 | 0,970134229 | -0,11 | 0,869024111 | 0,22  | 0,678468552 | -0,12 | 0,808343584 | 0,06  | 0,953278094 |
| Zfp532  | -0,16 | 0,833900133 | -0,39 | 0,591180668 | -0,02 | 0,992633165 | 0,03  | 0,952768654 | -1,22 | 0,137555956 |
| Zfp534  | -0,07 | 0,949437499 | 0,56  | 0,539246778 | -0,44 | 0,2771516   | 0,17  | 0,810172317 | -0,03 | 0,988084587 |
| Zfp536  | -0,01 | 0,995106813 | 0,55  | 0,293982265 | 0,1   | 0,90345282  | -0,68 | 0,117453724 | -0,64 | 0,202710391 |
| Zfp54   | 0,06  | 0,96311249  | -0,05 | 0,979338536 | 0,17  | 0,894339966 | 0,29  | 0,798741105 | 0,54  | 0,551972106 |
| Zfp541  | -0,06 | 0,940514265 | 0,27  | 0,859954464 | -0,13 | 0,894229514 | -0,3  | 0,376628904 | -0,09 | 0,904830156 |
| Zfp551  | 0,05  | 0,963914207 | 0,18  | 0,668463436 | -0,08 | 0,955334536 | -0,4  | 0,477211575 | -0,27 | 0,742636733 |
| Zfp553  | -0,35 | 0,632420805 | -0,4  | 0,565456041 | -0,03 | 0,964659521 | 0,38  | 0,435241831 | -0,04 | 0,96918257  |

|        |       |             |       |             |       |             |       |             |       |             |
|--------|-------|-------------|-------|-------------|-------|-------------|-------|-------------|-------|-------------|
| Zfp558 | 0,36  | 0,813790257 | -0,36 | 0,765325717 | -0,08 | 0,959544822 | 0,64  | 0,367726725 | 0,08  | 0,939948423 |
| Zfp560 | 0,47  | 0,618317596 | 0,53  | 0,667097376 | 0,54  | 0,279980018 | 0,02  | 0,984714881 | 0,03  | 0,980961333 |
| Zfp563 | 0,07  | 0,956705598 | 0,16  | 0,826265098 | -0,17 | 0,894229514 | -1,01 | 0,254373421 | 0,05  | 0,969937563 |
| Zfp566 | -0,01 | 0,993175772 | 0,01  | 0,998237793 | 0,29  | 0,753966565 | -0,16 | 0,908862851 | 0,17  | 0,917766344 |
| Zfp568 | -0,44 | 0,316599006 | -0,39 | 0,639133791 | 0,17  | 0,831266864 | 0,47  | 0,274415093 | -0,06 | 0,960974478 |
| Zfp57  | -0,28 | 0,580117138 | 0,18  | 0,826486917 | 0,18  | 0,904057901 | 0,83  | 0,103418783 | 0,03  | 0,973428839 |
| Zfp572 | 0,26  | 0,54401985  | -0,05 | 0,917832564 | -0,07 | 0,922318683 | 0,02  | 0,972244785 | 0,19  | 0,725587145 |
| Zfp574 | 0,03  | 0,97454391  | 0,03  | 0,970020205 | 0,18  | 0,823823322 | -0,28 | 0,537912396 | -0,27 | 0,633381473 |
| Zfp575 | -0,16 | 0,777335496 | 0,12  | 0,854578468 | -0,14 | 0,813180174 | -0,06 | 0,898801714 | 0,13  | 0,886027227 |
| Zfp579 | -0,31 | 0,645120888 | 0,55  | 0,51915071  | 0,39  | 0,654076196 | -0,49 | 0,490200621 | -0,33 | 0,75103789  |
| Zfp58  | -0,38 | 0,499007529 | 0     | 1           | 0,11  | 0,928606229 | -0,23 | 0,762999762 | 0,06  | 0,943296691 |
| Zfp580 | -0,08 | 0,8634587   | -0,05 | 0,914014028 | 0     | 0,999931921 | 0,26  | 0,599572973 | 0,13  | 0,87233004  |
| Zfp583 | 0,27  | 0,820102157 | 0,21  | 0,932429589 | 0,06  | 0,973732268 | -1,29 | 0,057435078 | 0,12  | 0,885872093 |
| Zfp59  | 0,51  | 0,61300824  | 0,56  | 0,656204868 | -0,16 | 0,873867385 | -0,7  | 0,561974208 | -0,33 | 0,76521225  |
| Zfp592 | 0,47  | 0,364243885 | 0,09  | 0,897038013 | 0,07  | 0,969928932 | -0,24 | 0,80341881  | 0,43  | 0,572463557 |
| Zfp593 | 0,51  | 0,388432897 | 0,15  | 0,74534168  | 0,28  | 0,661747229 | 0,64  | 0,258942884 | 1     | 0,110728904 |
| Zfp595 | -0,11 | 0,944546118 | 0,72  | 0,325242663 | -0,88 | 0,255047612 | -1,69 | 0,011088797 | -0,46 | 0,791694696 |
| Zfp597 | 0,41  | 0,586161271 | 0,31  | 0,66248025  | -0,75 | 0,544583457 | 0,34  | 0,555470395 | -0,28 | 0,742614391 |
| Zfp598 | -0,35 | 0,479545376 | -0,24 | 0,531706188 | 0,03  | 0,97548193  | 0,42  | 0,37151602  | 0,11  | 0,898185407 |
| Zfp599 | -0,84 | 0,324249353 | 0,07  | 0,961440613 | 0,96  | 0,23829372  | 0,51  | 0,402472168 | -0,58 | 0,464702845 |
| Zfp60  | 0,12  | 0,873017028 | -0,02 | 0,994802028 | 0,24  | 0,865439478 | -1,5  | 0,042274887 | -0,52 | 0,34521709  |
| Zfp605 | -0,28 | 0,707480624 | -0,06 | 0,973945454 | -0,41 | 0,66170364  | -1,07 | 0,201807072 | 0,04  | 0,985982505 |
| Zfp606 | -0,09 | 0,914180919 | 0,27  | 0,692197518 | 0,18  | 0,895696786 | -0,06 | 0,947940753 | -0,24 | 0,907798813 |
| Zfp607 | -0,25 | 0,671077469 | -0,26 | 0,841184864 | -0,19 | 0,803209705 | -0,24 | 0,803590668 | -0,44 | 0,639345637 |
| Zfp608 | -0,26 | 0,834672627 | 0,26  | 0,582502577 | 0,06  | 0,956232887 | 1,02  | 0,29280701  | 0,94  | 0,316401979 |
| Zfp609 | 0,11  | 0,832513798 | 0     | 1           | 0,37  | 0,432229079 | -0,01 | 0,987977078 | -0,35 | 0,534767398 |
| Zfp61  | 0,38  | 0,766705553 | 0,47  | 0,715688609 | 0,42  | 0,581148105 | -1,17 | 0,298836375 | -0,08 | 0,973162988 |
| Zfp612 | 0,17  | 0,909885273 | -0,55 | 0,45420995  | -0,54 | 0,483761569 | 0,12  | 0,765866501 | 0,06  | 0,952206434 |
| Zfp616 | -0,02 | 0,98555838  | 0,55  | 0,467362999 | -0,12 | 0,912968686 | -0,86 | 0,419446232 | -0,16 | 0,917347603 |
| Zfp617 | -0,21 | 0,732196499 | -0,03 | 0,994137877 | 0,07  | 0,966359868 | -0,43 | 0,696508135 | 0,04  | 0,976393169 |
| Zfp618 | 0,16  | 0,893137556 | 0,05  | 0,967338233 | -0,02 | 0,990836784 | -0,32 | 0,869497105 | 0,32  | 0,880878318 |
| Zfp619 | -0,3  | 0,869565514 | 0,07  | 0,970630941 | -0,72 | 0,537671687 | -0,42 | 0,56514466  | 0,38  | 0,616140729 |
| Zfp62  | -0,23 | 0,831529237 | -0,23 | 0,847885195 | 0     | 0,998779926 | 0,23  | 0,792680799 | 0,25  | 0,884248437 |
| Zfp622 | -0,06 | 0,933912196 | 0,19  | 0,618087796 | 0,29  | 0,591404136 | 0,04  | 0,949257442 | 0     | 0,994905191 |
| Zfp623 | 0,73  | 0,664036618 | -0,1  | 0,935984823 | 0,76  | 0,705915392 | -1,49 | 0,008249806 | -0,32 | 0,55122001  |

|          |       |             |       |             |       |             |       |             |       |             |
|----------|-------|-------------|-------|-------------|-------|-------------|-------|-------------|-------|-------------|
| Zfp626   | -0,1  | 0,944685982 | 1,29  | 0,4427505   | -0,12 | 0,957152002 | -0,8  | 0,520506543 | 0,12  | 0,950965682 |
| Zfp628   | 0,1   | 0,869565514 | -0,18 | 0,850135665 | 0,01  | 0,994700527 | -0,58 | 0,245000756 | -0,87 | 0,107696714 |
| Zfp629   | -0,46 | 0,419591944 | -0,39 | 0,832460257 | -0,87 | 0,14251251  | -0,08 | 0,909873635 | -0,35 | 0,718869886 |
| Zfp637   | 0,03  | 0,973859723 | -0,35 | 0,547143296 | -0,48 | 0,485752425 | -0,07 | 0,927867778 | 0,01  | 0,991559961 |
| Zfp638   | 0,25  | 0,69373851  | 0,25  | 0,564859581 | -0,21 | 0,830336321 | -0,43 | 0,529366123 | 0,61  | 0,360726287 |
| Zfp639   | 1,01  | 0,230372335 | 0,39  | 0,475079924 | -0,57 | 0,546514616 | 0,42  | 0,690442683 | 0,88  | 0,456564217 |
| Zfp64    | -0,87 | 0,079135571 | -0,48 | 0,694422914 | 0,31  | 0,660517013 | 0,68  | 0,279770006 | -0,83 | 0,334666016 |
| Zfp640   | -0,08 | 0,877610332 | 0,1   | 0,854940418 | -0,19 | 0,737241227 | -0,04 | 0,919889648 | 0,12  | 0,861056054 |
| Zfp641   | 0,03  | 0,960597621 | 0,05  | 0,958856577 | -0,32 | 0,592021373 | -0,21 | 0,685043191 | 0,03  | 0,97425848  |
| Zfp644   | 0,04  | 0,967380775 | -0,11 | 0,852752397 | -0,1  | 0,922318683 | 0,12  | 0,789516436 | 0,09  | 0,912250982 |
| Zfp646   | -0,02 | 0,980085387 | -0,2  | 0,789051952 | -0,63 | 0,292557534 | -0,75 | 0,074366038 | -0,62 | 0,20389911  |
| Zfp647   | 0,3   | 0,687662951 | 0,07  | 0,94766092  | -0,22 | 0,772098345 | -0,14 | 0,874984008 | -0,02 | 0,981439632 |
| Zfp648   | 0,2   | 0,592100391 | 0,01  | 0,988550087 | -0,07 | 0,921956183 | 0,05  | 0,912867628 | -0,14 | 0,838030732 |
| Zfp65    | 0,38  | 0,672753295 | 0,49  | 0,639698557 | -0,84 | 0,498531839 | -0,29 | 0,614617075 | 0,54  | 0,385014622 |
| Zfp651   | 0,44  | 0,676800971 | 0,33  | 0,582478031 | 0,32  | 0,905632058 | -0,82 | 0,413953044 | -0,24 | 0,895756587 |
| Zfp652   | -0,11 | 0,854484314 | -0,06 | 0,926247439 | 0,55  | 0,397324055 | -0,18 | 0,63322171  | -0,13 | 0,855281866 |
| Zfp652os | 0,15  | 0,751534367 | -0,14 | 0,786405071 | -0,11 | 0,867543859 | 0,29  | 0,57819548  | -0,05 | 0,953297732 |
| Zfp653   | 0,22  | 0,644636    | 0,27  | 0,686540452 | 0,43  | 0,479303047 | -0,68 | 0,122179076 | -0,32 | 0,634398349 |
| Zfp654   | 0,04  | 0,957427783 | 0,16  | 0,872939051 | 0     | 0,998425248 | -0,31 | 0,490447708 | 0,21  | 0,792404969 |
| Zfp655   | 0,07  | 0,964358894 | -0,07 | 0,981475625 | 0,23  | 0,805542835 | 0,04  | 0,968266606 | 0,07  | 0,956822408 |
| Zfp658   | -0,18 | 0,807062435 | 0,14  | 0,781046971 | -0,22 | 0,804607903 | -0,25 | 0,648192366 | 0,09  | 0,935812103 |
| Zfp661   | 0,23  | 0,754255105 | 0,08  | 0,963226008 | -0,39 | 0,637321546 | -0,34 | 0,815182755 | -0,31 | 0,825966687 |
| Zfp663   | 0,12  | 0,905445944 | 0,17  | 0,896187678 | -0,35 | 0,569943085 | 0,43  | 0,198447056 | 0,3   | 0,726042963 |
| Zfp664   | -0,2  | 0,676429707 | 0,45  | 0,764886087 | 0,27  | 0,666575428 | 0,08  | 0,945086901 | 0,21  | 0,836205142 |
| Zfp667   | -0,48 | 0,719941262 | -0,54 | 0,629355436 | 0,12  | 0,924808211 | -0,56 | 0,295154663 | -0,51 | 0,503166372 |
| Zfp668   | -0,41 | 0,717407143 | -0,56 | 0,31069547  | 0,09  | 0,911634383 | 0,24  | 0,460307888 | -0,72 | 0,360718516 |
| Zfp672   | 0,14  | 0,793209485 | 0,12  | 0,932292974 | 0,02  | 0,99129124  | -0,67 | 0,124505112 | -0,1  | 0,950056013 |
| Zfp677   | 0,18  | 0,854858973 | -0,2  | 0,831580851 | 0,15  | 0,930645703 | 0,17  | 0,908141892 | -0,3  | 0,836061657 |
| Zfp68    | -0,21 | 0,812059531 | 0,05  | 0,943915456 | 0,76  | 0,194619745 | 0,05  | 0,983166423 | 0,76  | 0,619416028 |
| Zfp687   | -0,24 | 0,751534367 | -0,47 | 0,373555617 | 0,79  | 0,432912125 | 0,37  | 0,519073085 | 0,08  | 0,939948423 |
| Zfp688   | 0,1   | 0,892141122 | -0,35 | 0,545981335 | 0,24  | 0,856313091 | -0,34 | 0,490835105 | -0,09 | 0,939948423 |
| Zfp689   | 0,4   | 0,565920521 | -0,38 | 0,625404791 | 0,06  | 0,914301036 | 0,24  | 0,779796922 | 0,17  | 0,873380019 |
| Zfp69    | 0,07  | 0,897717279 | -0,04 | 0,98845779  | 0,73  | 0,547368463 | 0,5   | 0,608614479 | 0,37  | 0,587305934 |
| Zfp691   | 0,28  | 0,70137787  | -0,2  | 0,747433721 | -0,12 | 0,893321094 | 0,86  | 0,069388938 | -0,19 | 0,765327693 |
| Zfp692   | -0,4  | 0,547519398 | -0,05 | 0,958187617 | 0,24  | 0,791940256 | -0,22 | 0,744077504 | -0,91 | 0,140018656 |

|         |       |             |       |             |       |             |       |             |       |             |
|---------|-------|-------------|-------|-------------|-------|-------------|-------|-------------|-------|-------------|
| Zfp697  | 0,23  | 0,707480624 | 0,02  | 0,986742203 | -0,04 | 0,980423952 | -0,09 | 0,869234665 | 0,05  | 0,956790564 |
| Zfp7    | -0,2  | 0,801386084 | -0,3  | 0,815973308 | 0,33  | 0,771729329 | -0,5  | 0,610095355 | -0,62 | 0,422263547 |
| Zfp703  | -0,12 | 0,840909921 | -0,14 | 0,882589938 | -0,09 | 0,922318683 | 0,97  | 0,087979099 | 0,13  | 0,920748161 |
| Zfp704  | -0,15 | 0,859007415 | 0,31  | 0,625875078 | 0,14  | 0,899941244 | -1,34 | 0,013195605 | -0,5  | 0,265670764 |
| Zfp706  | 0,16  | 0,69184055  | 0,03  | 0,965147491 | 0,11  | 0,85833551  | 0,25  | 0,434097802 | 0,23  | 0,68987325  |
| Zfp707  | 0,21  | 0,694841396 | -0,09 | 0,912535732 | -0,27 | 0,713746744 | -0,6  | 0,611632616 | -0,72 | 0,518337819 |
| Zfp708  | 0,26  | 0,883130741 | 0,58  | 0,598869078 | -0,96 | 0,222624355 | -0,2  | 0,734497576 | 0,12  | 0,947559952 |
| Zfp709  | -0,39 | 0,61300824  | 0,26  | 0,587634717 | 0,09  | 0,954453764 | -1,16 | 0,159711276 | -0,06 | 0,968130547 |
| Zfp710  | -0,37 | 0,545805455 | -0,14 | 0,820806352 | -0,23 | 0,682309944 | 0,03  | 0,946065261 | -0,06 | 0,939464844 |
| Zfp711  | -0,28 | 0,714662474 | -0,07 | 0,955872959 | 0,53  | 0,380602105 | 1,38  | 0,094014104 | -0,04 | 0,980945466 |
| Zfp712  | -0,38 | 0,811215544 | 0,45  | 0,720857435 | -1,19 | 0,375948654 | -1,31 | 0,407559474 | 0,28  | 0,925126264 |
| Zfp715  | -0,43 | 0,687662951 | 0,3   | 0,824009135 | 0,36  | 0,684873751 | -1,7  | 0,069407862 | -0,01 | 0,992671375 |
| Zfp719  | 0,36  | 0,758183995 | 0,5   | 0,446315327 | -0,27 | 0,700259013 | -0,88 | 0,067770937 | -0,13 | 0,878683884 |
| Zfp72   | -0,23 | 0,576400203 | -0,26 | 0,785244931 | -0,06 | 0,951210125 | -0,94 | 0,098909699 | -0,35 | 0,734445655 |
| Zfp729a | -0,22 | 0,932826874 | 0,97  | 0,245041145 | 0,11  | 0,955689221 | -1,25 | 0,45869835  | 0,2   | 0,940438527 |
| Zfp729b | -0,24 | 0,520196827 | -0,55 | 0,606605405 | 0,64  | 0,500343254 | -0,75 | 0,447310044 | -0,28 | 0,835191    |
| Zfp735  | 0,08  | 0,903817676 | 0,08  | 0,908247038 | -0,28 | 0,57717258  | -0,13 | 0,82237355  | 0,02  | 0,980961333 |
| Zfp74   | -1,02 | 0,416382346 | -0,26 | 0,852000868 | 0,08  | 0,975982548 | -0,23 | 0,858266288 | 0,66  | 0,443159458 |
| Zfp740  | 0,23  | 0,773823304 | -0,07 | 0,968235275 | 0,09  | 0,921207094 | -0,25 | 0,798741105 | 0,27  | 0,841160223 |
| Zfp746  | -0,36 | 0,637682938 | 0,42  | 0,536246395 | -0,23 | 0,840824939 | -0,3  | 0,679886975 | -0,17 | 0,860469017 |
| Zfp747  | -0,47 | 0,463897981 | -0,22 | 0,676064277 | 0,29  | 0,809137779 | 0,09  | 0,935076398 | 0,37  | 0,792305774 |
| Zfp748  | -0,09 | 0,906885053 | -0,5  | 0,758114521 | 0,19  | 0,882540073 | -0,6  | 0,510589408 | -0,23 | 0,862984047 |
| Zfp750  | 0,16  | 0,830575431 | -0,07 | 0,886728509 | -0,28 | 0,666305832 | 0,33  | 0,364250425 | 0,06  | 0,948163009 |
| Zfp758  | 0,25  | 0,866720868 | 1,01  | 0,410501758 | 0,15  | 0,941627748 | -0,19 | 0,960747562 | 1,48  | 0,558817182 |
| Zfp759  | -0,36 | 0,632635324 | -0,38 | 0,483329454 | 0,33  | 0,727554633 | -1,34 | 0,311626709 | 0,15  | 0,966268839 |
| Zfp760  | -0,18 | 0,922118639 | 0,14  | 0,96172404  | 0,45  | 0,660920525 | -0,98 | 0,452750906 | -0,73 | 0,583882299 |
| Zfp763  | -0,42 | 0,572652085 | -0,02 | 0,994390365 | -0,06 | 0,966884313 | -1,27 | 0,216231559 | -0,87 | 0,276728769 |
| Zfp764  | -0,44 | 0,495413345 | 0,2   | 0,847821325 | 0,2   | 0,920926565 | -0,14 | 0,817348489 | -0,21 | 0,814864454 |
| Zfp768  | -0,12 | 0,895072199 | 0,63  | 0,430658524 | -0,69 | 0,465949919 | -0,53 | 0,321336556 | -0,5  | 0,559721978 |
| Zfp770  | 0,23  | 0,7830424   | 0,3   | 0,821227978 | -0,14 | 0,898380589 | -0,73 | 0,079938142 | -0,18 | 0,822818919 |
| Zfp771  | -0,75 | 0,132779189 | 0,03  | 0,996285446 | 0,01  | 0,997268369 | -0,49 | 0,405818144 | -0,51 | 0,805718723 |
| Zfp772  | 0,76  | 0,111767257 | 0,59  | 0,651942972 | 0,07  | 0,979788785 | -0,88 | 0,699027667 | -1,18 | 0,583434544 |
| Zfp773  | 0,6   | 0,357726359 | 0,27  | 0,703291096 | -0,11 | 0,878636183 | -0,16 | 0,897334554 | 0,04  | 0,980961333 |
| Zfp775  | -0,34 | 0,546026761 | 0,12  | 0,914014028 | -0,17 | 0,828127077 | 0,08  | 0,928002892 | 0,04  | 0,97203474  |
| Zfp777  | 0,16  | 0,869644066 | -0,37 | 0,693906911 | 0,65  | 0,36401558  | 0,13  | 0,829591443 | -0,62 | 0,450989196 |

|           |       |             |       |             |       |             |       |             |       |             |
|-----------|-------|-------------|-------|-------------|-------|-------------|-------|-------------|-------|-------------|
| Zfp78     | 0,61  | 0,239601221 | -0,35 | 0,737385437 | -0,17 | 0,91821779  | 0,18  | 0,825258543 | 0,24  | 0,827032122 |
| Zfp780b   | 0,85  | 0,588801063 | 0,19  | 0,855632384 | -0,69 | 0,702677589 | -1,17 | 0,09591711  | 0,32  | 0,612061926 |
| Zfp781    | 0,24  | 0,717407143 | -0,08 | 0,927205716 | -0,25 | 0,718016051 | -0,01 | 0,993595251 | -0,07 | 0,949544475 |
| Zfp783    | 0,17  | 0,887555241 | -0,36 | 0,6041496   | -0,12 | 0,895434884 | 0,36  | 0,372503505 | 0,24  | 0,637926661 |
| Zfp784    | -0,18 | 0,703606438 | -0,04 | 0,956504634 | 0,02  | 0,990185412 | -0,63 | 0,128641759 | -0,56 | 0,305995061 |
| Zfp786    | -0,14 | 0,860723207 | 0,05  | 0,958376623 | 0,2   | 0,859484164 | 0,19  | 0,899335603 | 0,13  | 0,944506507 |
| Zfp787    | 0,1   | 0,91774858  | 0,55  | 0,48352062  | -0,23 | 0,791504463 | 0,06  | 0,932800758 | 0,22  | 0,772772997 |
| Zfp788    | -0,19 | 0,865689677 | 0,12  | 0,889728253 | 0,55  | 0,462123525 | -0,8  | 0,151602463 | -1,12 | 0,056791486 |
| Zfp790    | 0,02  | 0,990717834 | 0,41  | 0,631460903 | -0,65 | 0,291981713 | -1,11 | 0,040750961 | -0,42 | 0,540089233 |
| Zfp791    | 0,2   | 0,832947001 | -0,3  | 0,750160982 | 0,02  | 0,993379272 | 0,1   | 0,922778648 | -0,34 | 0,695593525 |
| Zfp799    | -0,21 | 0,844095084 | -0,37 | 0,882822729 | -0,71 | 0,321560439 | -1,08 | 0,021666564 | -0,32 | 0,702558142 |
| Zfp800    | 0,41  | 0,525216441 | 0,09  | 0,87892334  | 0,1   | 0,898557764 | 0,29  | 0,415968391 | 0,75  | 0,104212171 |
| Zfp804a   | 0,37  | 0,718996404 | 0,17  | 0,883145635 | 0,17  | 0,864598204 | -0,26 | 0,729857506 | -0,05 | 0,974553568 |
| Zfp804b   | 0,2   | 0,618050407 | 0,07  | 0,885072868 | -0,13 | 0,852219946 | -0,08 | 0,886806548 | -0,18 | 0,778286965 |
| Zfp808    | 0,25  | 0,904043614 | -0,49 | 0,906676303 | 0,42  | 0,485752425 | 0,63  | 0,805452009 | -1,05 | 0,537589934 |
| Zfp809    | -0,83 | 0,180862229 | -0,09 | 0,854940418 | 0,27  | 0,702689055 | 0,09  | 0,84279206  | 0,16  | 0,848955614 |
| Zfp81     | -0,58 | 0,409977631 | 0,56  | 0,674902403 | 0,36  | 0,679406979 | -0,22 | 0,854971757 | 0,77  | 0,509987724 |
| Zfp810    | -0,02 | 0,984972115 | 0,04  | 0,958545812 | 0,11  | 0,909800082 | 0,28  | 0,597350222 | 0,87  | 0,21468203  |
| Zfp811    | -0,15 | 0,850952988 | 0,13  | 0,902847035 | -0,09 | 0,885042765 | 0,26  | 0,635869722 | 0,29  | 0,675282484 |
| Zfp819    | 0,19  | 0,690560567 | -0,24 | 0,678357594 | -0,3  | 0,727262258 | 0,12  | 0,893846627 | -0,11 | 0,928724353 |
| Zfp82     | 0,54  | 0,65525391  | 0,05  | 0,982328934 | -0,09 | 0,926566777 | -0,49 | 0,461824013 | -0,17 | 0,847001197 |
| Zfp820    | -0,49 | 0,782369077 | 0,46  | 0,877770697 | -1    | 0,386628051 | -0,81 | 0,6405928   | -1,15 | 0,322765215 |
| Zfp821    | -0,41 | 0,546166185 | -0,09 | 0,911319259 | -0,03 | 0,985977985 | -0,13 | 0,902095386 | -0,29 | 0,720844381 |
| Zfp825    | 0,32  | 0,642516435 | 0,36  | 0,74031644  | -0,24 | 0,810997588 | -1,07 | 0,24748215  | -0,13 | 0,913553402 |
| Zfp827    | -0,09 | 0,865884601 | 0,13  | 0,916496897 | 0,88  | 0,308914223 | 1,01  | 0,161937858 | -0,43 | 0,601753447 |
| Zfp830    | 0,03  | 0,972112267 | -0,14 | 0,831404974 | -0,14 | 0,914134206 | 0,16  | 0,70344102  | 0,17  | 0,855646079 |
| Zfp831    | -0,26 | 0,584008829 | 0,28  | 0,754578715 | -0,36 | 0,603802059 | -0,19 | 0,715042501 | -0,32 | 0,633381473 |
| Zfp839    | 0,36  | 0,603330883 | 0,1   | 0,916496897 | -0,11 | 0,904057901 | -0,72 | 0,477226066 | -0,32 | 0,831612519 |
| Zfp84     | -0,14 | 0,888652674 | 0,16  | 0,91395667  | 0,95  | 0,253878285 | -0,56 | 0,474538793 | 0,04  | 0,979456872 |
| Zfp846    | -0,5  | 0,507090099 | -0,15 | 0,915727653 | -0,07 | 0,963199274 | -0,69 | 0,320611937 | 0,36  | 0,44306977  |
| Zfp85     | -0,22 | 0,803064624 | 0,12  | 0,936792848 | 0,09  | 0,935456304 | -1,09 | 0,312323585 | -0,43 | 0,862182983 |
| Zfp850    | 0,07  | 0,964358894 | -0,55 | 0,564634931 | 0,23  | 0,894239558 | -0,1  | 0,921731995 | -0,54 | 0,389664866 |
| Zfp853    | 0,25  | 0,634740228 | 0,05  | 0,942410245 | -0,22 | 0,736445534 | -0,14 | 0,715042501 | 0,2   | 0,809134979 |
| Zfp85os   | 0,17  | 0,852358078 | -0,45 | 0,60897378  | 0,31  | 0,719386001 | 0,07  | 0,923775458 | -0,1  | 0,934242963 |
| Zfp862-ps | -0,19 | 0,784558415 | 0,17  | 0,828219939 | -0,14 | 0,862480223 | -0,55 | 0,284940277 | 0,47  | 0,731927583 |

|         |       |             |       |             |       |             |       |             |       |             |
|---------|-------|-------------|-------|-------------|-------|-------------|-------|-------------|-------|-------------|
| Zfp865  | -0,67 | 0,200222183 | -0,26 | 0,702251293 | 0,4   | 0,540458576 | -0,02 | 0,987979751 | -0,14 | 0,889884382 |
| Zfp866  | -0,12 | 0,859600103 | -0,07 | 0,971337832 | 0,07  | 0,955742302 | -0,56 | 0,33036166  | -0,34 | 0,765809384 |
| Zfp867  | -0,65 | 0,455526465 | 0,46  | 0,551002019 | 0,22  | 0,870377336 | -1    | 0,077970276 | 0     | 0,997876986 |
| Zfp868  | 0,75  | 0,406819287 | -0,06 | 0,955872959 | -0,11 | 0,935978536 | -0,59 | 0,239405289 | -0,07 | 0,939448119 |
| Zfp869  | -0,28 | 0,593540946 | 0,31  | 0,593605226 | -0,29 | 0,527929204 | -0,22 | 0,716951875 | 0,07  | 0,948163009 |
| Zfp87   | 0,09  | 0,91938052  | -0,02 | 0,991507752 | 0,67  | 0,483761569 | -0,48 | 0,331469785 | -0,4  | 0,648312151 |
| Zfp870  | -0,3  | 0,61300824  | 0,3   | 0,654719935 | 0,35  | 0,57717258  | 0     | 0,999997968 | -0,41 | 0,836061657 |
| Zfp871  | -0,53 | 0,430723846 | -0,21 | 0,843162191 | -0,15 | 0,906069709 | 0,1   | 0,899737654 | -0,47 | 0,558833293 |
| Zfp872  | 0,04  | 0,97300035  | 0,3   | 0,808222835 | -0,39 | 0,628978443 | -0,02 | 0,988205241 | 0,54  | 0,529853591 |
| Zfp873  | 0,47  | 0,5409797   | 0,06  | 0,97566802  | 0,18  | 0,913422365 | 0,4   | 0,799835488 | -0,03 | 0,983613958 |
| Zfp874a | 0,23  | 0,892358883 | 0,04  | 0,986782918 | 0,66  | 0,660517013 | -0,7  | 0,428767536 | -0,72 | 0,450543672 |
| Zfp874b | -0,56 | 0,613347532 | -0,26 | 0,93163271  | -0,84 | 0,539319843 | -0,77 | 0,652007823 | 0,38  | 0,822732686 |
| Zfp879  | 0,2   | 0,761259992 | -0,11 | 0,880892852 | -0,09 | 0,950846671 | 0,22  | 0,696843539 | -0,4  | 0,726042963 |
| Zfp882  | 0,12  | 0,836107067 | -0,02 | 0,9860901   | -0,15 | 0,840187016 | -0,18 | 0,664161531 | 0,25  | 0,886027227 |
| Zfp9    | -0,13 | 0,858748956 | -0,64 | 0,589733014 | 0,54  | 0,509459765 | 1,75  | 0,017059793 | -0,09 | 0,939448119 |
| Zfp90   | 0,05  | 0,939156623 | -0,06 | 0,916042399 | 0,03  | 0,985347628 | -0,19 | 0,743093921 | 0,02  | 0,99004065  |
| Zfp91   | -0,15 | 0,742958309 | -0,08 | 0,925078626 | 0,02  | 0,991240121 | 0,13  | 0,726061111 | -0,31 | 0,574285481 |
| Zfp92   | 0,23  | 0,738448626 | 0,26  | 0,658998976 | -0,02 | 0,991416175 | 0,14  | 0,866735562 | 0,44  | 0,518980587 |
| Zfp93   | -0,44 | 0,74817039  | -0,53 | 0,648353961 | 0,21  | 0,917508513 | -0,81 | 0,337568585 | -0,45 | 0,692784012 |
| Zfp930  | -0,61 | 0,49976831  | -0,95 | 0,560357477 | 0,21  | 0,921956183 | -0,48 | 0,686514009 | -0,45 | 0,836061657 |
| Zfp933  | -0,4  | 0,568473441 | 0,04  | 0,978487997 | 0,01  | 0,996260936 | -0,42 | 0,61105561  | -0,36 | 0,794054354 |
| Zfp934  | -0,69 | 0,422668323 | -0,17 | 0,903595287 | 0,05  | 0,976092199 | 0,25  | 0,80718406  | -0,16 | 0,824818547 |
| Zfp935  | -0,09 | 0,9231839   | -0,08 | 0,980518468 | 0,35  | 0,881924837 | 0,23  | 0,851926687 | 0,7   | 0,623214829 |
| Zfp936  | -0,13 | 0,923033769 | 0,07  | 0,925569254 | -0,24 | 0,775963444 | 0,04  | 0,969377207 | 0,04  | 0,980945466 |
| Zfp937  | 0,13  | 0,882027826 | 0,15  | 0,809003394 | -0,26 | 0,666305832 | -0,3  | 0,627887862 | -0,03 | 0,979643119 |
| Zfp938  | -1,35 | 0,378598836 | -1,72 | 0,425465202 | -0,04 | 0,99131872  | 0,44  | 0,75629951  | -1,07 | 0,499287915 |
| Zfp939  | -0,18 | 0,736503749 | 0,56  | 0,705845461 | 0,05  | 0,976042637 | -1,22 | 0,247845465 | 0,22  | 0,782552648 |
| Zfp94   | -0,02 | 0,981937173 | -0,07 | 0,9002387   | 0,08  | 0,923350407 | -0,75 | 0,212316393 | -0,66 | 0,255267133 |
| Zfp940  | -0,17 | 0,91409989  | 0,46  | 0,632895831 | 0,24  | 0,841669036 | -0,68 | 0,337568585 | -1,09 | 0,097560409 |
| Zfp941  | -0,11 | 0,857585372 | 0     | 1           | -0,41 | 0,570086392 | 0,21  | 0,675727528 | 0,1   | 0,922921816 |
| Zfp942  | 0,08  | 0,96497803  | 0,4   | 0,747707816 | 0,86  | 0,37814131  | 0,95  | 0,243098785 | 1,81  | 0,048272729 |
| Zfp943  | -0,88 | 0,658350988 | -0,34 | 0,812664394 | 0,34  | 0,715407764 | 0,36  | 0,475216812 | 0,47  | 0,337960521 |
| Zfp944  | -0,17 | 0,840909921 | 0,19  | 0,89034555  | 0,64  | 0,534543192 | -0,37 | 0,74514989  | 0     | 0,99888749  |
| Zfp945  | 0,88  | 0,089531229 | 0,93  | 0,324694411 | -0,46 | 0,714808135 | -0,38 | 0,709570719 | 1,56  | 0,036486741 |
| Zfp946  | -0,36 | 0,653605926 | 0,52  | 0,633883634 | 0,35  | 0,853998055 | -0,38 | 0,575586039 | -0,22 | 0,752710644 |



|         |       |             |       |             |       |             |       |             |       |             |
|---------|-------|-------------|-------|-------------|-------|-------------|-------|-------------|-------|-------------|
| Zfp947  | -0,32 | 0,821755762 | 0,76  | 0,606112034 | -0,6  | 0,469053827 | -0,85 | 0,717280617 | 0,1   | 0,979152939 |
| Zfp948  | 0,23  | 0,791295946 | -0,16 | 0,761820188 | 0,11  | 0,871603067 | 1,11  | 0,149106695 | 0,23  | 0,864373858 |
| Zfp949  | -0,42 | 0,626036023 | -0,02 | 0,994099344 | 0,53  | 0,608818938 | 0,48  | 0,257502291 | 0,54  | 0,314622557 |
| Zfp950  | 0,24  | 0,840909921 | -0,34 | 0,656294004 | 0,43  | 0,769583333 | -0,66 | 0,11232717  | 0,07  | 0,963556667 |
| Zfp951  | 0,49  | 0,794033774 | -0,42 | 0,875768275 | 0     | 0,997581017 | 0,54  | 0,471733727 | -0,03 | 0,969994712 |
| Zfp952  | 0,38  | 0,68161851  | -0,05 | 0,970020205 | 0,26  | 0,79007666  | 0,12  | 0,925196626 | 0,51  | 0,668706357 |
| Zfp953  | -1,15 | 0,455714377 | 0,42  | 0,48565018  | -1,04 | 0,240865131 | -1,77 | 0,13999659  | -0,9  | 0,468250907 |
| Zfp954  | -0,21 | 0,720829271 | 0,21  | 0,781046971 | 0,31  | 0,841563482 | -0,25 | 0,626711668 | -0,82 | 0,205694842 |
| Zfp955a | -0,14 | 0,797377565 | 0,33  | 0,565159043 | 0,14  | 0,885042765 | -0,8  | 0,312961819 | -0,34 | 0,681187459 |
| Zfp955b | -0,14 | 0,810208393 | -0,16 | 0,85154774  | 0,48  | 0,576625659 | -0,76 | 0,304896332 | -0,48 | 0,584681923 |
| Zfp956  | 0,47  | 0,576695743 | 0,11  | 0,95098509  | 0,19  | 0,849342965 | 0,34  | 0,852687535 | 0,27  | 0,916900441 |
| Zfp957  | 0,33  | 0,626534172 | -0,12 | 0,848835547 | -0,03 | 0,987563007 | 0,41  | 0,561182346 | 0,15  | 0,875421436 |
| Zfp958  | -0,38 | 0,374444487 | 0,1   | 0,839673299 | 0,06  | 0,947316802 | -0,74 | 0,192714889 | -0,48 | 0,521841588 |
| Zfp959  | -0,11 | 0,948926586 | -0,76 | 0,324289795 | 0,23  | 0,878688944 | 0,92  | 0,218506289 | 0,05  | 0,981439632 |
| Zfp960  | -0,05 | 0,964216121 | -0,22 | 0,919602924 | 0,03  | 0,988120354 | -0,71 | 0,535522582 | -0,24 | 0,840515079 |
| Zfp961  | -0,09 | 0,871087325 | 0,08  | 0,912535732 | 0,24  | 0,807786405 | -0,32 | 0,709632549 | -0,46 | 0,690409949 |
| Zfp963  | -0,51 | 0,546019769 | -0,08 | 0,978528738 | 0,11  | 0,900549137 | -0,49 | 0,618164093 | -1,2  | 0,253926408 |
| Zfp964  | -0,26 | 0,744748605 | 0,29  | 0,782652703 | -0,49 | 0,659636136 | -1,36 | 0,310873282 | 0,47  | 0,80155635  |
| Zfp97   | -0,05 | 0,982213914 | 0,04  | 0,984812702 | 0,17  | 0,862869965 | -1,61 | 0,113474052 | -0,91 | 0,471892288 |
| Zfpl1   | -0,04 | 0,94881239  | 0,05  | 0,958621018 | 0,41  | 0,720069267 | 0,16  | 0,706521454 | -0,53 | 0,417370658 |
| Zfpm1   | 0,19  | 0,772859736 | -0,23 | 0,615311543 | 0,21  | 0,789802954 | -0,42 | 0,575229515 | -0,47 | 0,552984261 |
| Zfpm2   | 0,7   | 0,172698611 | 0,05  | 0,981214034 | 0,82  | 0,582116339 | 1,17  | 0,269023716 | 0,91  | 0,443067005 |
| Zfr     | 0,04  | 0,964358894 | -0,09 | 0,941280932 | 0,24  | 0,691009366 | 0,11  | 0,758772982 | 0,22  | 0,697818445 |
| Zfr2    | 0,12  | 0,799145501 | -0,5  | 0,216491969 | -0,09 | 0,911921787 | -0,01 | 0,979829655 | -0,09 | 0,922931338 |
| Zfx     | 0,32  | 0,798561927 | 0,29  | 0,649542145 | 0,3   | 0,774337646 | -0,18 | 0,847641912 | -0,15 | 0,91314596  |
| Zfy1    | 0,03  | 0,982217147 | 0,1   | 0,900801202 | -0,33 | 0,477735848 | 0,44  | 0,488724747 | 0,01  | 0,992694729 |
| Zfy2    | -0,06 | 0,928103232 | -0,37 | 0,722938629 | -0,35 | 0,479698621 | 0,36  | 0,353241029 | 0,12  | 0,91339829  |
| Zfyve1  | -0,11 | 0,833900133 | 0,11  | 0,890196173 | 0,28  | 0,569619692 | 0,02  | 0,987129323 | -0,05 | 0,973428839 |
| Zfyve16 | -0,62 | 0,59141369  | 0,54  | 0,208445991 | 0,3   | 0,751201307 | -0,03 | 0,955931622 | 0,28  | 0,593298551 |
| Zfyve19 | -0,06 | 0,94881239  | -0,2  | 0,798434186 | 0,06  | 0,96260087  | 0,05  | 0,955119589 | -0,43 | 0,576617913 |
| Zfyve21 | 0,22  | 0,667514029 | 0,41  | 0,557875295 | -0,36 | 0,838724766 | -0,24 | 0,545372369 | -0,81 | 0,15855616  |
| Zfyve26 | -0,12 | 0,882500171 | -0,05 | 0,948048585 | 0,02  | 0,984778342 | -0,44 | 0,232695925 | -0,47 | 0,388661175 |
| Zfyve27 | 0,02  | 0,983516046 | 0,22  | 0,810146573 | -0,04 | 0,971268254 | -0,53 | 0,235558038 | -0,43 | 0,358556306 |
| Zfyve28 | 0,31  | 0,698332739 | 0,33  | 0,508633526 | -0,47 | 0,613433145 | -0,65 | 0,128119399 | -0,41 | 0,483349426 |
| Zfyve9  | -0,24 | 0,597519827 | -0,24 | 0,689957982 | 0,47  | 0,610559205 | -0,52 | 0,197646348 | -0,76 | 0,244965154 |

|          |       |             |       |             |       |             |       |             |       |             |
|----------|-------|-------------|-------|-------------|-------|-------------|-------|-------------|-------|-------------|
| Zg16     | 0,13  | 0,856118781 | -0,11 | 0,827289479 | -0,23 | 0,711649664 | 0,05  | 0,907157184 | -0,16 | 0,845142293 |
| Zglp1    | 0,06  | 0,939317944 | -0,37 | 0,746132762 | 0,1   | 0,892881818 | 0,58  | 0,16761671  | 0,48  | 0,34276619  |
| Zgpat    | -0,14 | 0,831744184 | 0,13  | 0,831580851 | -0,06 | 0,935978536 | 0,18  | 0,817768517 | 0,22  | 0,825697364 |
| Zgrf1    | -0,32 | 0,825308689 | -0,64 | 0,481874669 | 1,28  | 0,068894819 | 0,53  | 0,48505774  | -0,42 | 0,673120647 |
| Zhx1     | -0,28 | 0,698158351 | -0,18 | 0,817110093 | -0,44 | 0,664130139 | -0,34 | 0,262882898 | 0,13  | 0,884640084 |
| Zhx2     | -0,78 | 0,299107037 | 0,05  | 0,964757836 | 0,04  | 0,97548193  | -1,05 | 0,09952751  | -0,16 | 0,857890348 |
| Zhx3     | -0,15 | 0,761457464 | -0,29 | 0,503323618 | -0,04 | 0,968067891 | -1,1  | 0,064119729 | -1,02 | 0,070962571 |
| Zic1     | 0,42  | 0,433492052 | -0,27 | 0,802616913 | 0,04  | 0,965007082 | 0,83  | 0,244334606 | 0,55  | 0,269299455 |
| Zic2     | 0,13  | 0,808572184 | -0,04 | 0,987162042 | 0,04  | 0,968742139 | -0,06 | 0,950597099 | 0,11  | 0,864943787 |
| Zic3     | 0,23  | 0,714127381 | 0,1   | 0,872388615 | 0,16  | 0,777918093 | 0,4   | 0,201771306 | 0,45  | 0,337960521 |
| Zic4     | -0,52 | 0,423595612 | 0,42  | 0,683632754 | 0,26  | 0,85092959  | -0,2  | 0,786750698 | -0,1  | 0,939607682 |
| Zic5     | 0,02  | 0,973545171 | 0,11  | 0,922399849 | -0,02 | 0,980665308 | 0,27  | 0,561566618 | 0,32  | 0,502676586 |
| Zik1     | -1,84 | 0,259797168 | -0,8  | 0,402393337 | 0,22  | 0,85974488  | 0,74  | 0,31851075  | 0,16  | 0,934223529 |
| Zim1     | 0,08  | 0,973545171 | -0,24 | 0,763005394 | 0,35  | 0,610313044 | -0,33 | 0,845785501 | -0,15 | 0,955836352 |
| Zim3     | 0,2   | 0,747541552 | -0,11 | 0,930192503 | 0,34  | 0,697890099 | -0,3  | 0,642973595 | 0,47  | 0,633315948 |
| Zkscan1  | 0,01  | 0,990894139 | 0,04  | 0,954024651 | 0,51  | 0,679178305 | -0,13 | 0,847311525 | -0,32 | 0,540089233 |
| Zkscan14 | -0,15 | 0,884560043 | -0,84 | 0,213731156 | -0,44 | 0,43566321  | 0,01  | 0,99232579  | -0,41 | 0,673120647 |
| Zkscan16 | -0,07 | 0,922118639 | -0,62 | 0,609632892 | -0,28 | 0,62463782  | -0,1  | 0,911705784 | -0,32 | 0,745958051 |
| Zkscan17 | 0,22  | 0,72696312  | 0,02  | 0,98459889  | -0,16 | 0,819011008 | 0,73  | 0,118191105 | 0,1   | 0,930689432 |
| Zkscan2  | -0,11 | 0,865055523 | 0,1   | 0,910193022 | 0     | 0,999931921 | -0,1  | 0,827432986 | 0,06  | 0,95587699  |
| Zkscan3  | 0,17  | 0,897717279 | 0,47  | 0,734712271 | 0,33  | 0,844258774 | -0,58 | 0,284374871 | 0,25  | 0,760042789 |
| Zkscan4  | 0     | 0,998584113 | -0,21 | 0,639698557 | -0,04 | 0,95907725  | -0,34 | 0,260474964 | -0,51 | 0,306747854 |
| Zkscan5  | -0,06 | 0,924561835 | -0,35 | 0,599495018 | 0,03  | 0,988120354 | -0,34 | 0,586817197 | -0,21 | 0,858526809 |
| Zkscan6  | 0,03  | 0,990894139 | 0,02  | 0,993398521 | -0,26 | 0,846176253 | 0,16  | 0,871940348 | 0,41  | 0,766559546 |
| Zkscan7  | 0,16  | 0,897077512 | 0,28  | 0,602956592 | -1,25 | 0,291981713 | -1,51 | 0,045034122 | -0,56 | 0,686012752 |
| Zkscan8  | -0,9  | 0,269161604 | 0,12  | 0,950654933 | 0,07  | 0,962401213 | -1,81 | 0,079938142 | -0,28 | 0,759191514 |
| Zmat1    | -0,03 | 0,988602915 | 0,23  | 0,826165513 | -0,83 | 0,205580227 | -1,36 | 0,043852819 | -0,06 | 0,952299975 |
| Zmat2    | -0,22 | 0,712165686 | -0,17 | 0,701492683 | 0,06  | 0,97041109  | -0,22 | 0,742313334 | -0,18 | 0,873506336 |
| Zmat3    | -0,45 | 0,673291416 | 0,14  | 0,890989791 | 0,58  | 0,264273523 | 0,2   | 0,660608351 | 0,13  | 0,859609058 |
| Zmat4    | -0,14 | 0,923820085 | 0,01  | 0,996259587 | -0,06 | 0,950846671 | 0,56  | 0,578867273 | -0,09 | 0,948935854 |
| Zmat5    | -0,35 | 0,413477239 | -0,42 | 0,325242663 | -0,07 | 0,954453764 | -0,2  | 0,686521503 | -0,8  | 0,215131944 |
| Zmiz1    | -0,33 | 0,470146816 | -0,71 | 0,187729631 | 0,12  | 0,835677021 | -0,3  | 0,425113866 | -0,54 | 0,344052279 |
| Zmiz1os1 | -0,02 | 0,976574175 | 0,08  | 0,910818577 | 0,37  | 0,412427594 | -0,19 | 0,68639254  | -0,16 | 0,792236484 |
| Zmiz2    | -0,41 | 0,364628239 | -0,32 | 0,427797998 | 0,4   | 0,538966694 | -0,5  | 0,139647943 | -0,43 | 0,365240345 |
| Zmpste24 | -0,31 | 0,536848116 | -0,37 | 0,536246395 | 0,45  | 0,568984164 | 0,79  | 0,418644417 | 0,33  | 0,77959286  |

|          |       |             |       |             |       |             |       |             |       |             |
|----------|-------|-------------|-------|-------------|-------|-------------|-------|-------------|-------|-------------|
| Zmym1    | 0,91  | 0,51663224  | -1,03 | 0,104971247 | 0,78  | 0,500278506 | 0,59  | 0,475255589 | -0,09 | 0,95985938  |
| Zmym2    | 0,01  | 0,993175772 | -0,36 | 0,656204868 | -0,49 | 0,332444911 | -0,05 | 0,929835301 | -0,15 | 0,853107295 |
| Zmym3    | -0,32 | 0,619463695 | 0,25  | 0,742730285 | -0,47 | 0,307848353 | -0,52 | 0,493856127 | -0,17 | 0,910721379 |
| Zmym4    | 0     | 0,999551145 | -0,1  | 0,916176914 | 0,4   | 0,399470425 | 0,65  | 0,253124162 | 0,26  | 0,723883531 |
| Zmym5    | 0,25  | 0,552073244 | 0,13  | 0,884620032 | -0,45 | 0,548750983 | 0,05  | 0,958172386 | 0,29  | 0,723861142 |
| Zmym6    | 0,25  | 0,632053719 | 0,52  | 0,715688609 | -0,36 | 0,742758388 | -0,97 | 0,197646348 | -0,32 | 0,718299139 |
| Zmynd10  | 0,22  | 0,665320629 | 0,13  | 0,910688765 | -0,56 | 0,622546805 | -0,02 | 0,984136649 | 0,45  | 0,702993783 |
| Zmynd11  | -0,08 | 0,892559851 | 0,15  | 0,746025194 | -0,01 | 0,9954711   | -0,19 | 0,664095843 | 0,32  | 0,621590361 |
| Zmynd12  | -0,1  | 0,928544937 | 0,14  | 0,874479139 | 0,09  | 0,882540073 | -0,29 | 0,716763005 | 0,04  | 0,976743304 |
| Zmynd15  | 0,3   | 0,658898834 | 0,75  | 0,260289589 | -0,03 | 0,991240121 | -0,72 | 0,07836971  | 0,77  | 0,360199105 |
| Zmynd19  | -0,56 | 0,642618049 | -0,9  | 0,213731156 | 0,87  | 0,332905005 | 0,73  | 0,48728376  | 0,03  | 0,984125319 |
| Zmynd8   | 0,24  | 0,691033117 | 0,26  | 0,692004648 | -0,53 | 0,238418725 | -0,48 | 0,253124162 | -0,43 | 0,457431943 |
| Znf41-ps | -0,68 | 0,23876753  | 0,71  | 0,505089058 | -0,21 | 0,922318683 | 0,3   | 0,673568397 | -0,43 | 0,761782208 |
| Znf660   | -0,14 | 0,864400092 | -0,03 | 0,977697653 | -0,25 | 0,640810851 | -0,45 | 0,529366123 | 0,02  | 0,990633766 |
| Znfx1    | 0,2   | 0,788231572 | 0,48  | 0,319029651 | -0,51 | 0,405230228 | -1,02 | 0,080185028 | 0,48  | 0,436708262 |
| Znhit1   | 0,79  | 0,15490509  | 0,06  | 0,933075539 | -0,11 | 0,892364621 | 0,22  | 0,700431952 | -0,08 | 0,951429597 |
| Znhit2   | -0,12 | 0,867243066 | 0,01  | 0,989873399 | -0,12 | 0,887630371 | 0,04  | 0,943143586 | -0,09 | 0,909363599 |
| Znhit3   | 0,3   | 0,600995396 | 0,06  | 0,938944149 | -0,4  | 0,59891105  | 0,03  | 0,972529187 | 0,31  | 0,675519772 |
| Znhit6   | -0,64 | 0,247531815 | -0,42 | 0,488407055 | 0,2   | 0,860738021 | 0,67  | 0,339858865 | 0,42  | 0,673945231 |
| Znrd1    | 0,11  | 0,792735264 | 0,19  | 0,721114342 | -0,36 | 0,487799104 | -0,06 | 0,932315462 | 0,34  | 0,5617737   |
| Znrd1as  | -0,74 | 0,567790521 | 0,44  | 0,75198259  | 0,25  | 0,839096359 | -2,02 | 0,044184887 | 0,14  | 0,890957032 |
| Znrf1    | 0,22  | 0,631544171 | 0,44  | 0,391783269 | -0,18 | 0,794284994 | 0,11  | 0,800853287 | 0,44  | 0,317819733 |
| Znrf2    | -0,23 | 0,832696131 | 0,16  | 0,808222835 | -0,65 | 0,291949275 | 0,26  | 0,690659674 | 0,87  | 0,20277408  |
| Znrf3    | -0,91 | 0,111767257 | -0,55 | 0,518494408 | 0,32  | 0,69942327  | -0,58 | 0,182875687 | -0,14 | 0,881943508 |
| Znrf4    | -0,3  | 0,595466702 | -0,04 | 0,956776447 | 0,25  | 0,763552205 | 0,11  | 0,802239788 | 0,19  | 0,830415283 |
| Zp1      | 0,32  | 0,550197782 | 0,26  | 0,828034932 | 0,03  | 0,973732268 | 0,11  | 0,898641987 | 0,13  | 0,876719251 |
| Zp2      | 0,48  | 0,397054492 | 0,08  | 0,903089182 | -0,14 | 0,830336321 | 0,09  | 0,920563784 | 0,02  | 0,986849867 |
| Zp3      | -0,33 | 0,498030624 | -0,41 | 0,620236896 | 0,27  | 0,779114798 | -0,07 | 0,94771993  | -0,02 | 0,990633766 |
| Zp3r     | 0,06  | 0,955200574 | -0,1  | 0,862430716 | 0,16  | 0,887118162 | 0,25  | 0,751051801 | 0,47  | 0,600537288 |
| Zp4-ps   | 0,63  | 0,250204222 | 0,14  | 0,747707816 | -0,41 | 0,718431268 | -0,2  | 0,620416677 | 0,1   | 0,923530475 |
| Zpbp     | 0,49  | 0,412817433 | -0,35 | 0,561842393 | 0     | 0,999571656 | -0,15 | 0,911258809 | 0,04  | 0,979152939 |
| Zpbp2    | 0,38  | 0,613990129 | -0,04 | 0,98954147  | 0,42  | 0,566351122 | -0,51 | 0,495000574 | -0,76 | 0,329284951 |
| Zpld1    | 0,09  | 0,948291116 | -0,25 | 0,827289479 | -0,27 | 0,580049353 | 0,07  | 0,943864463 | -0,27 | 0,646919634 |
| Zpr1     | -0,52 | 0,379999787 | -0,07 | 0,910688765 | -0,6  | 0,281059383 | 0,15  | 0,71158821  | -0,04 | 0,965634816 |
| Zranb1   | -0,6  | 0,285699243 | 0,04  | 0,983496065 | -0,22 | 0,777918093 | -0,32 | 0,679886975 | 0,1   | 0,9478833   |

|         |       |             |       |             |       |             |       |             |       |             |
|---------|-------|-------------|-------|-------------|-------|-------------|-------|-------------|-------|-------------|
| Zranb2  | 0,32  | 0,61321357  | 0,2   | 0,854858856 | -0,38 | 0,598076555 | 0,04  | 0,937780843 | 0,11  | 0,933064949 |
| Zranb3  | -0,5  | 0,36240006  | -0,97 | 0,467937133 | 0,53  | 0,352057666 | 0,44  | 0,70800461  | -0,81 | 0,286600165 |
| Zrsr1   | 0,17  | 0,888313403 | -0,66 | 0,651611182 | -0,1  | 0,953951069 | -1,24 | 0,15999424  | 0,02  | 0,986971861 |
| Zrsr2   | -0,05 | 0,925460743 | 0,58  | 0,297241815 | 0,4   | 0,616398569 | -0,27 | 0,48485622  | 0,18  | 0,867655169 |
| Zscan10 | 0,04  | 0,959218841 | 0,12  | 0,91742429  | 0,08  | 0,935939183 | 0,17  | 0,822922136 | -0,18 | 0,800540569 |
| Zscan12 | 0,49  | 0,66331039  | 0,21  | 0,744425745 | -0,58 | 0,532815251 | -0,77 | 0,377065598 | -0,92 | 0,394654462 |
| Zscan18 | 0,09  | 0,864526424 | 0,06  | 0,958238294 | -0,04 | 0,949851253 | -0,3  | 0,70587063  | -0,61 | 0,436665335 |
| Zscan2  | 0,34  | 0,576959972 | -1,03 | 0,35804906  | 0,42  | 0,542398079 | -0,03 | 0,983775137 | -0,6  | 0,726339638 |
| Zscan20 | 0,21  | 0,764288636 | -0,06 | 0,926157704 | -0,27 | 0,693655482 | 0,04  | 0,943143586 | -0,13 | 0,836061657 |
| Zscan21 | -0,63 | 0,59710379  | 0,51  | 0,602956592 | -0,07 | 0,95167092  | -0,8  | 0,339858865 | -0,59 | 0,467061108 |
| Zscan22 | -0,07 | 0,942948768 | 0,08  | 0,919865797 | 0,22  | 0,720389578 | -0,94 | 0,061286094 | -0,13 | 0,904836805 |
| Zscan25 | -0,42 | 0,639605295 | -0,03 | 0,98459889  | -0,1  | 0,907367497 | 0,06  | 0,925176701 | -0,1  | 0,943668392 |
| Zscan26 | -0,48 | 0,313477058 | -0,03 | 0,957968757 | -0,45 | 0,382532767 | -0,3  | 0,548530772 | 0,25  | 0,713599145 |
| Zscan29 | -0,17 | 0,943079514 | 0,19  | 0,828219939 | 0,76  | 0,278260113 | -1,07 | 0,067122689 | -0,26 | 0,820905831 |
| Zscan30 | 0,15  | 0,84377795  | 0,41  | 0,480808447 | -0,08 | 0,963357998 | -0,89 | 0,2423686   | -0,39 | 0,783046884 |
| Zscan4a | -0,16 | 0,854061266 | 0,11  | 0,882589938 | -0,13 | 0,867543859 | -0,08 | 0,868619473 | 0,02  | 0,99004065  |
| Zscan4b | 0,07  | 0,925019201 | 0,2   | 0,610055593 | -0,23 | 0,744387748 | -0,04 | 0,959450564 | 0,13  | 0,906903733 |
| Zscan4c | 0,14  | 0,832696131 | 0,55  | 0,487097639 | -0,4  | 0,647928093 | -0,04 | 0,95328957  | 0,51  | 0,292832428 |
| Zscan4d | 0,04  | 0,955200574 | -0,11 | 0,932292974 | 0,07  | 0,95106142  | 0,36  | 0,391807778 | 0,57  | 0,416349602 |
| Zscan4f | 0,34  | 0,641985857 | 0,33  | 0,577864062 | -0,09 | 0,911506558 | -0,28 | 0,64875897  | 0,14  | 0,884321797 |
| Zscan5b | 0,08  | 0,909167171 | 0,07  | 0,887493001 | -0,36 | 0,676693033 | 0,2   | 0,619134782 | 0,13  | 0,868037689 |
| Zswim1  | -0,94 | 0,413608373 | 0,07  | 0,943915456 | 0,4   | 0,51127708  | -0,13 | 0,911253055 | -0,33 | 0,768768194 |
| Zswim2  | 0,21  | 0,795567544 | -0,05 | 0,928126994 | -0,6  | 0,557268968 | -0,07 | 0,898900573 | -0,04 | 0,971193667 |
| Zswim3  | 0,08  | 0,909284689 | 0,53  | 0,274378139 | 0,34  | 0,706780092 | -0,65 | 0,075079192 | -0,03 | 0,982779069 |
| Zswim4  | 0,04  | 0,957309423 | 0,19  | 0,805949528 | 0,07  | 0,9241587   | 1,27  | 0,05745194  | -0,17 | 0,850611225 |
| Zswim5  | 0     | 0,997282602 | 0,05  | 0,923044405 | -0,09 | 0,888371896 | -1,12 | 0,229901935 | -0,07 | 0,977967676 |
| Zswim6  | 0,27  | 0,586458491 | 0,14  | 0,801259805 | 0,23  | 0,660561609 | 0,66  | 0,094011812 | 0,57  | 0,202710391 |
| Zswim7  | -0,2  | 0,730965673 | -0,53 | 0,509349707 | -0,1  | 0,938710861 | -0,01 | 0,996714438 | -0,17 | 0,901139449 |
| Zswim8  | -0,1  | 0,858748956 | 0,09  | 0,929895266 | 0,08  | 0,910002544 | -0,3  | 0,596561607 | -0,25 | 0,723861142 |
| Zufsp   | 0,72  | 0,13473547  | 1,22  | 0,110541472 | -1,23 | 0,021585048 | -0,12 | 0,779059536 | 1,23  | 0,051651981 |
| Zw10    | -0,47 | 0,325246268 | -0,94 | 0,087435995 | 0,09  | 0,920828015 | 0,21  | 0,690488202 | -0,72 | 0,213451615 |
| Zwilch  | -0,58 | 0,376151377 | -1,16 | 0,194990095 | 0,6   | 0,37686469  | 1,64  | 0,04640378  | -0,05 | 0,973817481 |
| Zwint   | -0,14 | 0,808947569 | -0,6  | 0,208445991 | 0,28  | 0,595036513 | 1,32  | 0,065527079 | 0,02  | 0,98932552  |
| Zxda    | -0,27 | 0,680520303 | -0,01 | 0,985764487 | -0,38 | 0,709885771 | 0,02  | 0,986608648 | 0,29  | 0,639071244 |
| Zxdb    | 0,3   | 0,664688117 | 0     | 1           | 0,5   | 0,653769944 | 0,85  | 0,603439118 | 0,61  | 0,655956123 |

|        |       |             |       |             |       |             |       |             |       |             |
|--------|-------|-------------|-------|-------------|-------|-------------|-------|-------------|-------|-------------|
| Zxdc   | 0,03  | 0,972682121 | 0,24  | 0,695689103 | -0,3  | 0,700186861 | -0,43 | 0,516439928 | -0,02 | 0,990633766 |
| Zyg11a | -0,05 | 0,94913976  | 0,32  | 0,388662754 | -0,43 | 0,43566321  | -0,02 | 0,967247581 | 0,31  | 0,608072805 |
| Zyg11b | -0,45 | 0,471408054 | -0,23 | 0,6547161   | -0,28 | 0,662451176 | 0,51  | 0,310289034 | 0,08  | 0,939448119 |
| Zyx    | 0     | 0,996998625 | 0,16  | 0,674832256 | 0,68  | 0,1795202   | 0,55  | 0,192863761 | -0,35 | 0,559721978 |
| Zzef1  | -0,15 | 0,754092173 | 0,3   | 0,564634931 | -0,69 | 0,374422909 | 0,68  | 0,09620225  | -0,29 | 0,588529144 |
| Zzz3   | -0,02 | 0,984967814 | 0,14  | 0,9152526   | 0,41  | 0,622546805 | 0,2   | 0,837190176 | 0,24  | 0,823098095 |

**Supplementary Table 3 | Statistics and reproducibility information**

| Figure | Experiment type/Treatmentgroup | "n" value total | Group size | Biological replications | Comment statistics (centre value/ error bars) | Comment                                           |
|--------|--------------------------------|-----------------|------------|-------------------------|-----------------------------------------------|---------------------------------------------------|
| 1b     | Cell culture                   | 3               | -          | 3                       | Mean + SD                                     |                                                   |
| 1c     | ATT                            | 16              | (8/8)      | 2                       | Mean + s.e.m.                                 |                                                   |
|        | Dox                            | 9               | (5/4)      | 2                       | Mean + s.e.m.                                 |                                                   |
|        | Dox                            | 10              | 10         | 1                       | Mean + s.e.m.                                 |                                                   |
| 1d     | Dox                            | 2               |            | 2                       |                                               | Shown is the same mouse before and 120h after dox |
| 1e     | Histology                      |                 |            |                         |                                               |                                                   |
|        | No dox                         | 2               |            | 2                       |                                               |                                                   |
|        | 120 h dox                      | 2               |            | 2                       |                                               |                                                   |
| 1f     | No dox                         | 8               | (6/2)      | 2                       |                                               |                                                   |
|        | Dox                            | 7               | (5/2)      | 2                       |                                               |                                                   |
| 1g     | Dox                            | 5               | (3/2)      | 2                       |                                               | Shown is the same mouse before and 120h after dox |
| 1h     | Histology                      |                 |            |                         |                                               |                                                   |
|        | No dox                         | 3               |            | 3                       |                                               |                                                   |
|        | 120 h dox                      | 2               |            | 2                       |                                               |                                                   |

|    |        |   |       |   |
|----|--------|---|-------|---|
| 1i | No dox | 7 | (4/3) | 2 |
|    | Dox    | 7 | (4/3) | 2 |

|    |     |   |       |   |
|----|-----|---|-------|---|
| 2a | Dox | 5 | (3/2) | 2 |
|----|-----|---|-------|---|

Shown is the same mouse before and 120h after dox

|    |           |   |  |   |
|----|-----------|---|--|---|
| 2b | Histology |   |  |   |
|    | No dox    | 2 |  | 2 |
|    | 120 h dox | 3 |  | 3 |

|    |        |   |       |   |
|----|--------|---|-------|---|
| 2c | No dox | 8 | (5/3) | 2 |
|    | Dox    | 7 | (4/3) | 2 |

|    |     |   |       |   |
|----|-----|---|-------|---|
| 2d | Dox | 4 | (3/1) | 2 |
|----|-----|---|-------|---|

Shown is the same mouse before and 120h after dox

|    |           |   |  |   |
|----|-----------|---|--|---|
| 2e | Histology |   |  |   |
|    | No dox    | 2 |  | 2 |
|    | 120 h dox | 3 |  | 3 |

|    |        |   |       |   |
|----|--------|---|-------|---|
| 2f | No dox | 6 | (2/4) | 2 |
|    | Dox    | 8 | (4/4) | 2 |

|    |     |   |  |   |
|----|-----|---|--|---|
| 2g | Dox | 3 |  | 3 |
|----|-----|---|--|---|

Shown is the same mouse before and 120h after dox

|    |           |   |  |   |
|----|-----------|---|--|---|
| 2h | Histology |   |  |   |
|    | No dox    | 2 |  | 2 |
|    | 120 h dox | 2 |  | 2 |

|    |                                                                |              |         |   |           |                         |                                                                      |
|----|----------------------------------------------------------------|--------------|---------|---|-----------|-------------------------|----------------------------------------------------------------------|
| 2i | No dox                                                         | 6            | (2/4)   | 2 |           |                         |                                                                      |
|    | Dox                                                            | 6            | (2/4)   | 2 |           |                         |                                                                      |
| 2j | No dox                                                         | 6            | (2/4)   | 2 |           | Same mice as in Fig. 2i |                                                                      |
|    | GFP pos                                                        |              |         |   | Mean + SD |                         |                                                                      |
|    | GFP neg                                                        |              |         |   | Mean + SD |                         |                                                                      |
|    | Dox                                                            | 6            | (2/4)   | 2 |           | Same mice as in Fig. 2i |                                                                      |
|    | GFP pos                                                        |              |         |   | Mean + SD |                         |                                                                      |
|    | GFP neg                                                        |              |         |   | Mean + SD |                         |                                                                      |
| 2k | No dox, WT                                                     | 6            | (3/3)   | 2 | Mean + SD |                         |                                                                      |
|    | 120 h dox, WT                                                  | 5            | (3/2)   | 2 | Mean + SD |                         |                                                                      |
|    | No dox, PIG <sup>Cmv-Cre</sup>                                 | 3            |         | 1 | Mean + SD |                         |                                                                      |
|    | 120 h dox, PIG <sup>Cmv-Cre</sup>                              | 5            | (3/2)   | 2 | Mean + SD |                         |                                                                      |
|    | No dox, PIG <sup>Pdgtb-Cre-IFN<math>\gamma</math>-del</sup>    | 9            | (3/3/3) | 3 | Mean + SD |                         |                                                                      |
|    | 120 h dox, PIG <sup>Pdgtb-Cre-IFN<math>\gamma</math>-del</sup> | 6            | (2/2/2) | 3 | Mean + SD |                         |                                                                      |
|    | No dox, PIG <sup>Fsp-Cre</sup>                                 | 4            | (3/1)   | 2 | Mean + SD |                         |                                                                      |
|    | 120 h dox, PIG <sup>Fsp-Cre</sup>                              | 3            | (2/1)   | 2 | Mean + SD |                         |                                                                      |
|    | No dox, PIG <sup>Lys-Cre</sup>                                 | 4            | (3/1)   | 2 | Mean + SD |                         |                                                                      |
|    | 120 h dox, PIG <sup>Lys-Cre</sup>                              | 5            | (3/2)   | 2 | Mean + SD |                         |                                                                      |
|    | No dox, PIG <sup>IFN<math>\gamma</math>R-del</sup>             | 7            | (2/2/3) | 3 | Mean + SD |                         |                                                                      |
|    | 120 h dox, PIG <sup>IFN<math>\gamma</math>R-del</sup>          | 4            | (2/2)   | 2 | Mean + SD |                         |                                                                      |
|    |                                                                |              |         |   |           |                         |                                                                      |
|    | 3a                                                             | Cell culture | 3       | - | 3<br>2    | Mean + SD<br>Mean       | IFN $\gamma$ ELISA from supernatant<br>Flowcytometry analysis of GFP |



|    |                         |   |   |        | expression                                                                                  |
|----|-------------------------|---|---|--------|---------------------------------------------------------------------------------------------|
| 3b | Cell culture            | 2 |   | 2      |                                                                                             |
| 3c | Window chamber analysis | 3 |   | 3      |                                                                                             |
| 3d | Window chamber analysis | 3 |   | 3      | Mean + s.e.m. Same mice as in Fig. 3c                                                       |
| 3e | Cell culture            | 3 | - | 3<br>2 | Mean + SD<br>Mean<br>TNF ELISA from supernatant<br>Flowcytometry analysis of GFP expression |
| 3f | L929 assay              | 2 |   | 2      | Mean + SD                                                                                   |
| 3g | Window chamber analysis | 4 |   | 4      |                                                                                             |
| 3h | Window chamber analysis | 4 |   | 4      | Mean + s.e.m. Same mice as in Fig. 3g                                                       |

|        |                                        |   |           |   |
|--------|----------------------------------------|---|-----------|---|
| EDF 1a | No dox, WT                             | 8 | (2/2/2/2) | 4 |
|        | Dox, WT                                | 8 | (5/3)     | 2 |
|        | No dox, IFN $\gamma$ R <sup>-del</sup> | 8 | (2/2/4)   | 3 |
|        | Dox, IFN $\gamma$ R <sup>-del</sup>    | 8 | (3/3/2)   | 3 |
|        | Dox, Rag <sup>-del</sup>               | 5 |           | 1 |
|        | Dox, WT                                | 6 |           | 1 |

|        |                                         |    |       |   |           |                                                   |
|--------|-----------------------------------------|----|-------|---|-----------|---------------------------------------------------|
| EDF 1b | Dox                                     | 5  | (3/2) | 2 |           | Shown is the same mouse before and 120h after dox |
| EDF 1c | No dox, WT                              | 3  |       | 3 |           | H&E                                               |
|        | Dox, WT                                 | 3  |       | 3 |           | H&E                                               |
|        | No dox, WT                              | 2  |       | 2 |           | Immunohistology                                   |
|        | Dox, WT                                 | 3  |       | 3 |           | Immunohistology                                   |
| EDF 1d | ATT                                     | 16 | (8/8) | 2 |           | Tumour growth of mice in Fig 1c                   |
| EDF 1e | Cell culture                            | 2  |       | 2 | Mean      | IFN $\gamma$ ELISA from supernatant               |
| EDF 1f | No dox                                  | 6  |       | 1 |           |                                                   |
|        | Dox                                     | 4  |       | 1 |           |                                                   |
| EDF 1g | No dox                                  | 5  |       | 1 | Mean + SD |                                                   |
|        | 120 h dox                               | 6  |       | 1 | Mean + SD |                                                   |
| EDF 1h | no ATT                                  | 4  |       | 1 | Mean + SD |                                                   |
|        | ATT WT T cells                          | 7  |       | 1 | Mean + SD |                                                   |
|        | ATT IFN $\gamma$ <sup>-/-</sup> T cells | 8  |       | 1 | Mean + SD |                                                   |

|        |              |   |  |   |  |                                                             |
|--------|--------------|---|--|---|--|-------------------------------------------------------------|
| EDF 2b | Cell culture | 2 |  | 2 |  | Flowcytometry analysis of GFP and IFN $\gamma$ R expression |
| EDF 2c | Cell culture | 2 |  | 2 |  | Flowcytometry analysis of MHC-I expression                  |

|        |  |   |  |   |  |                 |
|--------|--|---|--|---|--|-----------------|
| EDF 2d |  | 3 |  | 3 |  | Immunohistology |
| EDF 2e |  | 3 |  | 3 |  | Immunohistology |

|        |                                               |   |  |   |           |                 |
|--------|-----------------------------------------------|---|--|---|-----------|-----------------|
| EDF 3a |                                               | 3 |  | 3 |           | Immunohistology |
| EDF 3b | PIG <sup>If-NyR-del</sup>                     | 6 |  | 6 |           |                 |
|        | PIG <sup>Fsp-Cre</sup>                        | 5 |  | 5 |           |                 |
| EDF 3c |                                               | 2 |  | 2 |           | Immunohistology |
| EDF 3d | 120 h dox, Rag <sup>-del</sup>                | 6 |  | 1 | Mean + SD |                 |
|        | 120 h dox, Rag <sup>-del</sup> x<br>IFNgR-del | 5 |  | 1 | Mean + SD |                 |

|        |              |   |       |   |           |                 |
|--------|--------------|---|-------|---|-----------|-----------------|
| EDF 4a | No tamoxifen | 2 |       | 2 |           |                 |
|        | Tamoxifen    | 3 |       | 3 |           |                 |
| EDF 4b | No tamoxifen | 2 |       | 2 |           |                 |
|        | Tamoxifen    | 4 |       | 4 | Mean + SD |                 |
| EDF 4c |              | 3 |       | 3 |           | Immunohistology |
| EDF 4d | No dox       | 5 | (3/2) | 2 |           |                 |
|        | Dox          | 6 | (3/3) | 2 |           |                 |

|        |        |   |  |   |           |                                                   |
|--------|--------|---|--|---|-----------|---------------------------------------------------|
| EDF 4e | Dox    | 3 |  | 3 |           | Shown is the same mouse before and 120h after dox |
| EDF 4f | No dox | 2 |  | 2 |           |                                                   |
|        | Dox    | 3 |  | 3 |           |                                                   |
| EDF 4g | No dox | 3 |  | 1 | Mean + SD |                                                   |
|        | Dox    | 4 |  | 1 | Mean + SD |                                                   |

|        |                                            |   |       |   |           |                                               |
|--------|--------------------------------------------|---|-------|---|-----------|-----------------------------------------------|
| EDF 5a | No dox                                     | 3 |       | 3 |           | Immunohistology                               |
| EDF 5b | 1st row                                    | 3 |       | 1 |           | CD119 and GFP expression on endothelial cells |
|        | 2nd row                                    | 2 | (1/1) | 2 |           |                                               |
|        | 3rd row                                    | 3 | (2/1) | 2 |           |                                               |
|        | 4th row                                    | 3 | (2/1) | 2 |           |                                               |
| EDF 5c | WT                                         | 2 |       | 2 | Mean + SD |                                               |
|        | PIG <sup>Cmv-Cre</sup>                     | 3 |       | 3 | Mean + SD |                                               |
|        | PIG <sup>Pdgfb-Cre</sup>                   | 4 |       | 4 | Mean + SD |                                               |
|        | PIG <sup>Hsp-Cre</sup>                     | 3 |       | 3 | Mean + SD |                                               |
|        | PIG <sup>Lys-Cre</sup>                     | 4 |       | 4 | Mean + SD |                                               |
|        | PIG <sup>IFN<math>\gamma</math>R-del</sup> | 3 |       | 3 | Mean + SD |                                               |
| EDF 5f | WT, reisolated cells                       | 1 |       | 1 |           | IFN $\gamma$ ELISA from supernatant           |
|        | CMV, reisolated cells                      | 3 |       | 1 | Mean + SD | IFN $\gamma$ ELISA from supernatant           |
|        | PDGFB, reisolated cells                    | 3 |       | 1 | Mean + SD | IFN $\gamma$ ELISA from supernatant           |

|        |                                        |   |  |   |           |                                                                                                                                          |
|--------|----------------------------------------|---|--|---|-----------|------------------------------------------------------------------------------------------------------------------------------------------|
| EDF 5g | No dox, IFN $\gamma$ R <sup>-del</sup> | 2 |  | 1 |           |                                                                                                                                          |
|        | Dox, IFN $\gamma$ R <sup>-del</sup>    | 3 |  | 1 |           |                                                                                                                                          |
|        | No dox, WT                             | 3 |  | 1 | Mean + SD |                                                                                                                                          |
|        | Dox, WT                                | 3 |  | 1 | Mean + SD |                                                                                                                                          |
|        | No dox, PIG <sup>Pdgb-Cre</sup>        | 4 |  | 1 | Mean + SD | 2 mice of this group were additionally IFN $\gamma$ <sup>del</sup><br>3 mice of this group were additionally IFN $\gamma$ <sup>del</sup> |
|        | Dox, PIG <sup>Pdgb-Cre</sup>           | 6 |  | 1 | Mean + SD |                                                                                                                                          |

EDF 5h Same mice as in EDF 5g

|        |        |    |       |   |
|--------|--------|----|-------|---|
| EDF 6a | No dox | 10 | (7/3) | 2 |
|        | Dox    | 10 | (3/7) | 2 |

EDF 6b Same as Fig. 3c, different magnification

|        |           |   |  |   |           |
|--------|-----------|---|--|---|-----------|
| EDF 6c | No dox    | 3 |  | 3 | Mean + SD |
|        | 24 h dox  | 3 |  | 3 | Mean + SD |
|        | 48 h dox  | 3 |  | 3 | Mean + SD |
|        | 120 h dox | 3 |  | 3 | Mean + SD |

|        |           |   |  |   |           |                           |
|--------|-----------|---|--|---|-----------|---------------------------|
| EDF 6d | No dox    | 3 |  | 3 | Mean + SD | Same samples as in EDF 6c |
|        | 24 h dox  | 3 |  | 3 | Mean + SD |                           |
|        | 48 h dox  | 3 |  | 3 | Mean + SD |                           |
|        | 120 h dox | 3 |  | 3 | Mean + SD |                           |

|        |  |                           |
|--------|--|---------------------------|
| EDF 6e |  | Same samples as in EDF 6c |
| EDF 6f |  | Same samples as in EDF 6c |
| EDF 6g |  | Same samples as in EDF 6c |

|        |        |    |       |   |
|--------|--------|----|-------|---|
| EDF 7a | No dox | 9  | (5/4) | 2 |
|        | Dox    | 10 | (5/5) | 2 |

EDF 7b

Same as Fig. 3g, different magnification

|        |           |   |  |   |           |
|--------|-----------|---|--|---|-----------|
| EDF 7c | No dox    | 3 |  | 3 | Mean + SD |
|        | 24 h dox  | 3 |  | 3 | Mean + SD |
|        | 48 h dox  | 3 |  | 3 | Mean + SD |
|        | 120 h dox | 3 |  | 3 | Mean + SD |

|        |           |   |  |   |           |                           |
|--------|-----------|---|--|---|-----------|---------------------------|
| EDF 7d | No dox    | 3 |  | 3 | Mean + SD | Same samples as in EDF 7c |
|        | 24 h dox  | 3 |  | 3 | Mean + SD |                           |
|        | 48 h dox  | 3 |  | 3 | Mean + SD |                           |
|        | 120 h dox | 3 |  | 3 | Mean + SD |                           |

EDF 7e

Same samples as in EDF 7c

EDF 7f

Same samples as in EDF 7c

EDF 7g

Same samples as in EDF 7c

|        |                    |   |   |
|--------|--------------------|---|---|
| EDF 8a | No dox, IFNg-GFP   | 3 | 3 |
|        | 48 h dox, IFNg-GFP | 4 | 4 |
|        | No dox, TNF-GFP    | 3 | 3 |
|        | 120 h dox, TNF-GFP | 4 | 4 |

EDF 8b Mean + SD Same samples as in EDF 8a

|        |        |   |   |                 |
|--------|--------|---|---|-----------------|
| EDF 9a | No dox | 2 | 2 | Immunohistology |
|        | Dox    | 2 | 2 | Immunohistology |

|        |                          |   |   |
|--------|--------------------------|---|---|
| EDF 9b | Gene expression analysis | 3 | 3 |
|--------|--------------------------|---|---|

|        |                                                      |   |   |
|--------|------------------------------------------------------|---|---|
| EDF 9c | T cells, WT                                          | 3 | 3 |
|        | T cells, IFNg-del                                    | 5 | 5 |
|        | No dox, MCA313 <sup>IFN<math>\gamma</math>-IND</sup> | 3 | 3 |
|        | Dox, MCA313 <sup>IFN<math>\gamma</math>-IND</sup>    | 4 | 4 |
|        | No dox, J558L <sup>IFN<math>\gamma</math>-IND</sup>  | 3 | 3 |
|        | Dox, J558L <sup>IFN<math>\gamma</math>-IND</sup>     | 2 | 2 |

EDF 9d Same as in EDF 9c

|        |              |   |   |
|--------|--------------|---|---|
| EDF 9e | Cell culture | 2 | 2 |
|--------|--------------|---|---|

|        |                                  |   |       |                           |                                                         |
|--------|----------------------------------|---|-------|---------------------------|---------------------------------------------------------|
| EDF 9f | Cell culture                     | 2 |       | 2                         |                                                         |
| EDF 9g | No dox IRF4 <sup>wt/del</sup>    | 5 | (2/3) | 2                         |                                                         |
|        | 48 h dox IRF4 <sup>wt/del</sup>  | 5 | (2/3) | 2                         |                                                         |
|        | No dox IRF4 <sup>del/del</sup>   | 4 | (2/2) | 2                         |                                                         |
|        | 48 h dox IRF4 <sup>del/del</sup> | 5 | (2/3) | 2                         |                                                         |
| EDF 9h |                                  |   |       | Same samples as in EDF 9g |                                                         |
| EDF 9i | No dox, WT                       | 3 |       | 3                         | Same samples as in EDF 9g,<br>plus 3 WT mice each group |
|        | 48 h dox, WT                     | 3 |       | 3                         |                                                         |
| EDF 9j |                                  |   |       |                           | Same samples as in EDF 9g                               |

|         |           |   |  |   |           |                            |
|---------|-----------|---|--|---|-----------|----------------------------|
| EDF 10a |           |   |  |   |           | Same samples as in EDF 10b |
| EDF 10b | 0 h dox   | 5 |  | 5 | Mean + SD |                            |
|         | 48 h dox  | 3 |  | 3 |           |                            |
|         | 120 h dox | 5 |  | 5 |           |                            |
| EDF 10c | 0 h dox   | 5 |  | 5 | Mean + SD | Same samples as in EDF 10b |
|         | 48 h dox  | 3 |  | 3 |           |                            |
|         | 120 h dox | 5 |  | 5 |           |                            |
| EDF 10d | 0 h dox   | 5 |  | 5 | Mean + SD | Same samples as in EDF 10b |
|         | 48 h dox  | 3 |  | 3 |           |                            |



|               |           |   |   |                            |
|---------------|-----------|---|---|----------------------------|
|               | 120 h dox | 5 | 5 |                            |
| EDF 10e       |           |   |   | Same samples as in EDF 10b |
| EDF 10f       | 0 h dox   | 6 | 6 | Mean + SD                  |
|               | 48 h dox  | 3 | 3 |                            |
|               | 120 h dox | 5 | 5 |                            |
| EDF 10g       | 0 h dox   | 6 | 6 | Mean + SD                  |
|               | 48 h dox  | 3 | 3 |                            |
|               | 120 h dox | 4 | 4 |                            |
| EDF 10h and i | 0 h dox   |   |   | Same samples as in EDF 10g |
|               | 48 h dox  |   |   |                            |
|               | 120 h dox |   |   |                            |
| EDF 10j       | 0 h dox   | 3 | 3 |                            |
|               | 48 h dox  | 3 | 3 |                            |
|               | 120 h dox | 3 | 3 |                            |
| EDF 10k       |           |   |   | Same samples as in EDF 10j |
| EDF 10l       | 0 h dox   | 3 | 3 | Same samples as in EDF 10j |
|               | 48 h dox  | 3 | 3 |                            |
|               | 120 h dox | 3 | 3 |                            |
| EDF 10m       | No dox    | 2 | 2 |                            |
|               | Dox       | 2 | 2 |                            |

|         |          |   |   |           |                            |
|---------|----------|---|---|-----------|----------------------------|
| EDF 10n | Dox      |   |   |           | Same samples as in EDF 10o |
| EDF 10o | 0 h dox  | 3 | 3 | Mean + SD |                            |
|         | 48 h dox | 3 | 3 | Mean + SD |                            |

Shown are the number of mice included in experiments, replications of experiments, center value- and error bar information for each experiment.
